# Supplementary material
Source: PubMed Central journal article supplement (PMC2920892)

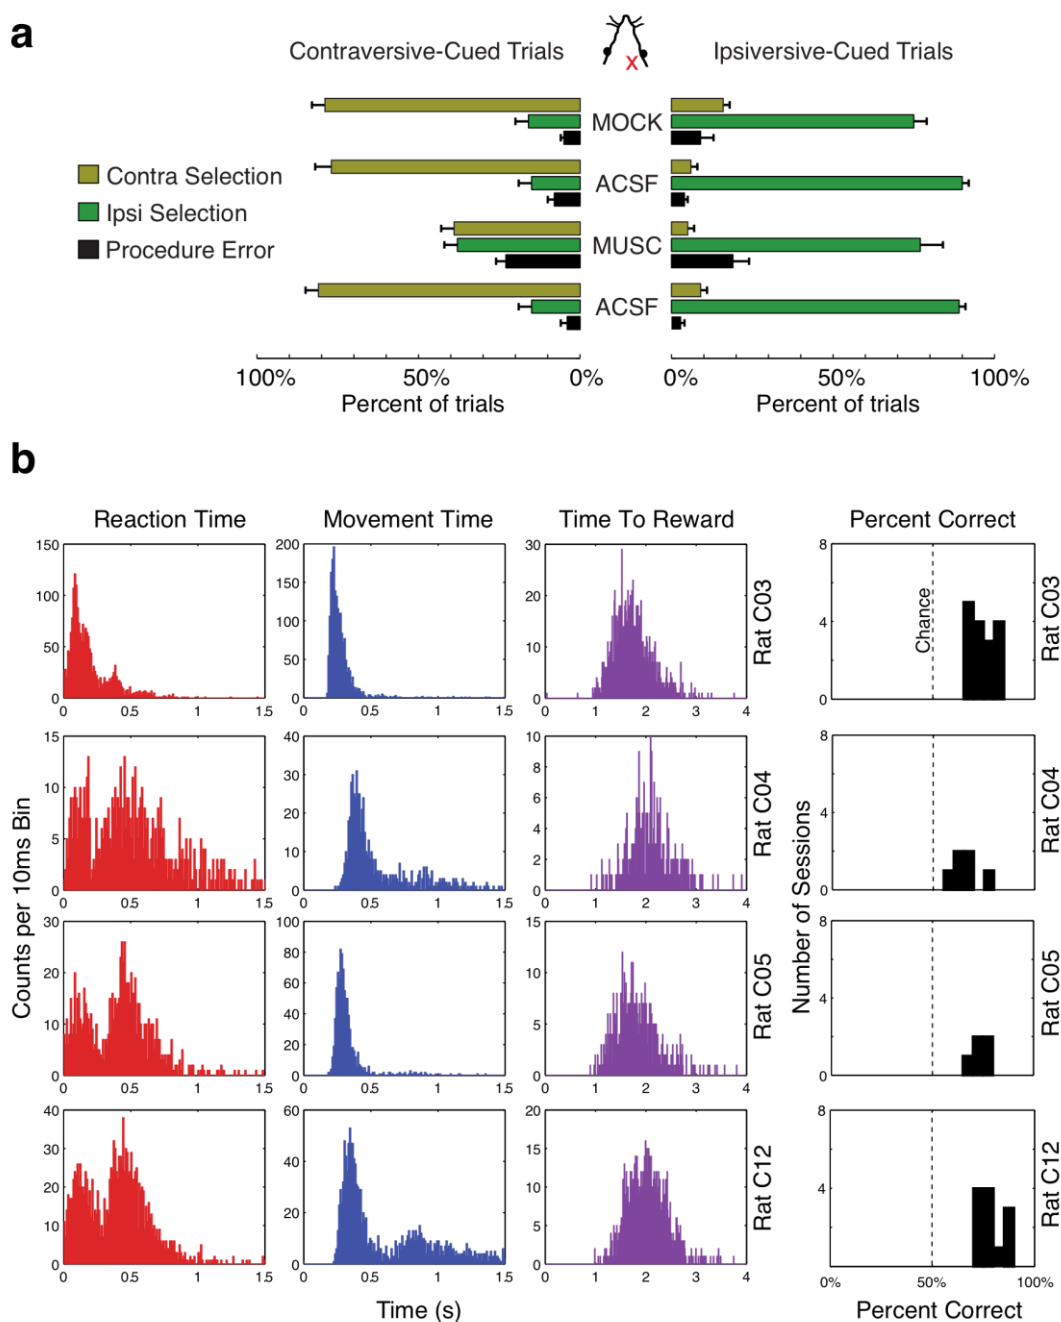

**Supplementary Figure 1: a)** Unilateral striatal injection of a GABA<sub>A</sub> agonist causes a selective, reversible deficit in contraversive responding. Results shown are from each of four successive daily behavioral sessions in which rats ( $n=6$ ) were tethered to an injection cannula but not infused (“MOCK” infusion, session 1), infused with artificial cerebrospinal fluid (“ACSF”, Sessions 2,4) or infused with 0.05  $\mu\text{g}$  muscimol (“MUSC”, session 3). “Contraversive-Cued Trials”, “Ipsiversive-Cued Trials” indicate whether the rat received an instruction cue to move to the nosepoke hole contralateral or ipsilateral to the injection side, respectively. Error bars, S.E.M. **b)** Reaction time, movement time, time to reward, and percent correct for each subject of the electrophysiology experiments. Behavioral data shown is only for those sessions for which we included neurons in the electrophysiological analyses. Note the prominent bimodal distribution in the reaction times. Regression analysis revealed that short RTs ( $< 300\text{ms}$ ) inversely varied with the hold time (“Go” - “Nose In”;  $p = 0.00004$ , regression t-test), while long RTs did not ( $p = 0.39$ , regression t-test) This suggests that the rats were sometimes anticipating the Go cue (short RT peak) and sometimes reacting to it (long RT peak). The percent correct session histograms are divided into 5% bins.

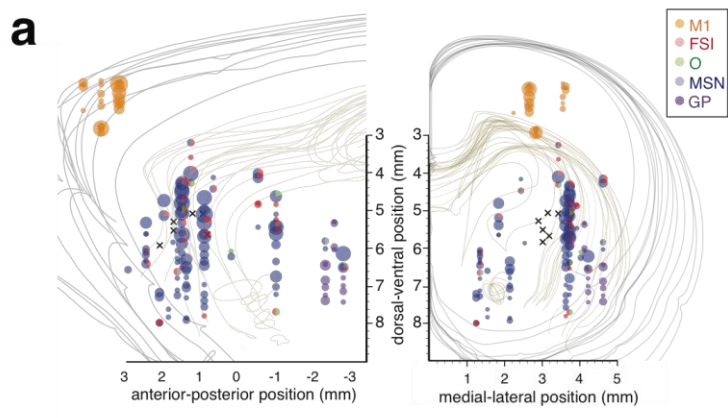

**Supplementary Figure 2:** **a)** Locations of electrophysiological recordings and drug infusions. Locations are shown as projections onto sagittal (left) and coronal (right) stacked atlas sections (Paxinos and Watson, 2005). Area of circles is proportion to number of simultaneously recorded cells, segment colors indicate the class of cells from each location. The location of each muscimol injection in the separate behavioral experiment is indicated with an "x". Note that the GP cells were recorded from caudal parts of that structure. **b)** Location of cells with peak activity during the "choice" or "reward" epochs. (Top) Location histogram of reward- and choice-related cells for FSI and MSN populations. Histogramical locations are given relative to bregma in the ML (left), AP (center), and DV (right) directions. The choice-related FSIs and MSNs did not show a significant relationship to position ( $p > 0.05$ , regression t-test for both choice and reward preference regressed against the recording location: ML, DV, AP, and distance from origin). (Bottom) Sagittal and coronal view of cell locations of FSI and MSN cells of each functional category.

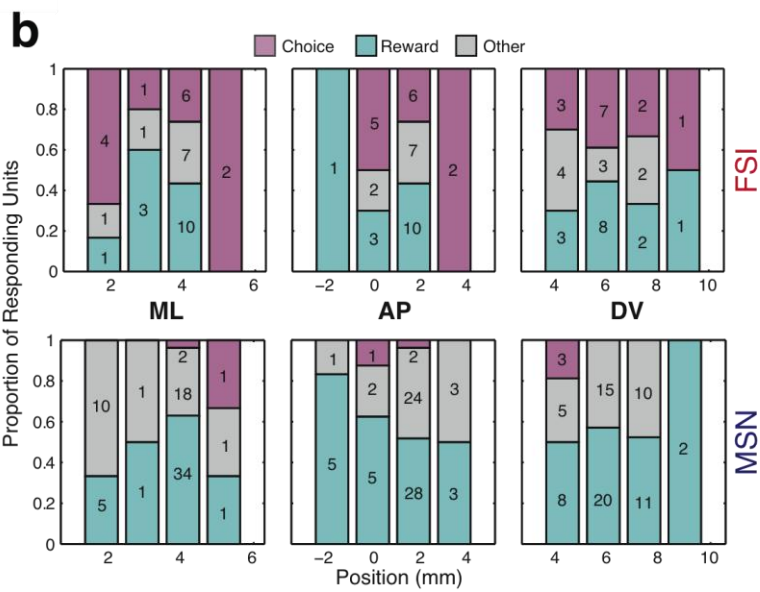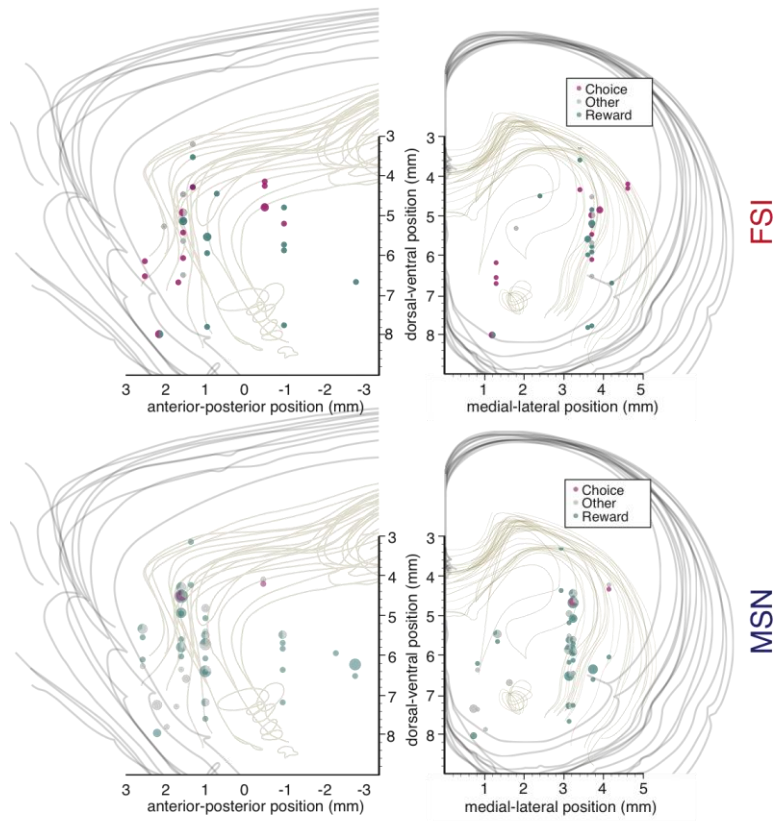

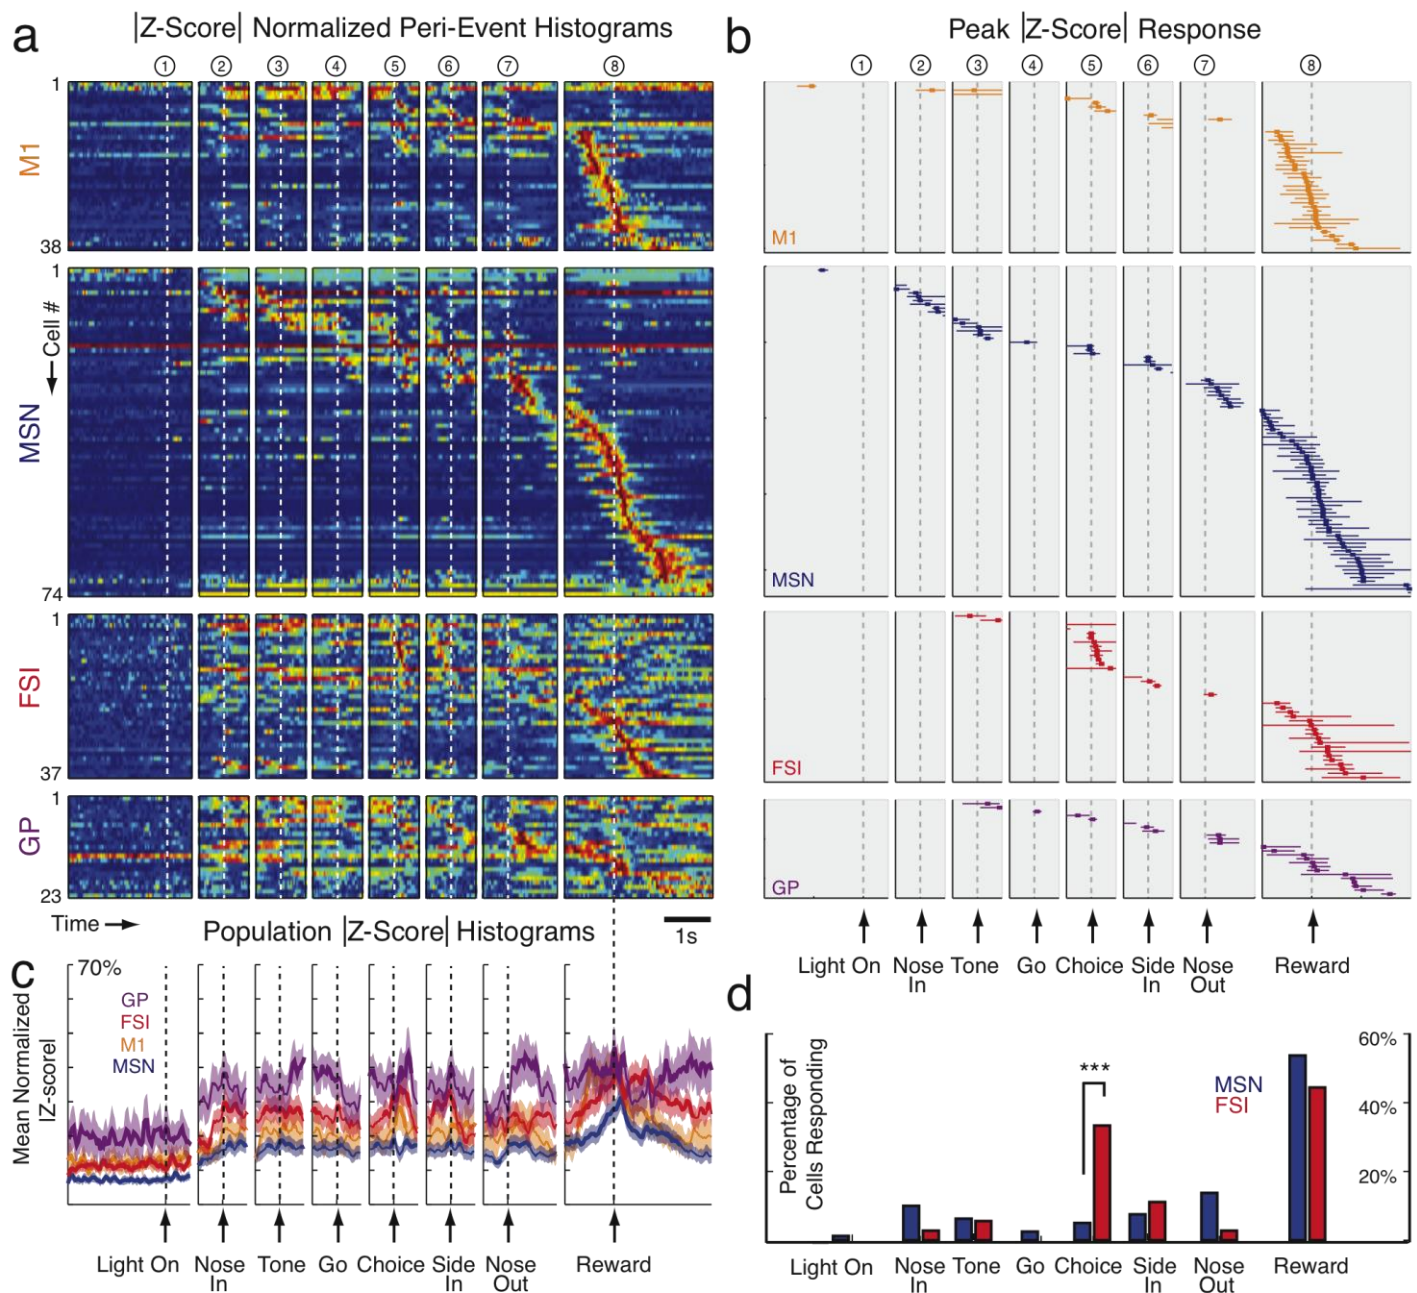

**Supplementary Figure 3:** |Z-score| normalized response profile. Format is identical to Figure 4, except that instead of firing rate the absolute value of the firing rate Z-scores are used instead (see Methods). This serves to highlight both increases and decreases in firing rate. PETHs are displayed as a heat map from blue (no change from baseline) to red (maximum change from baseline, either positive or negative). Using this variant of the analysis, the difference between the proportion of FSIs and MSNs responding to the choice execution event remained significant ( $p = 0.00065$ , two-sample population proportions test, adjusted for multiple comparisons), and all other pairs remained not significant ( $p > 0.05$ , adjusted for multiple comparisons).



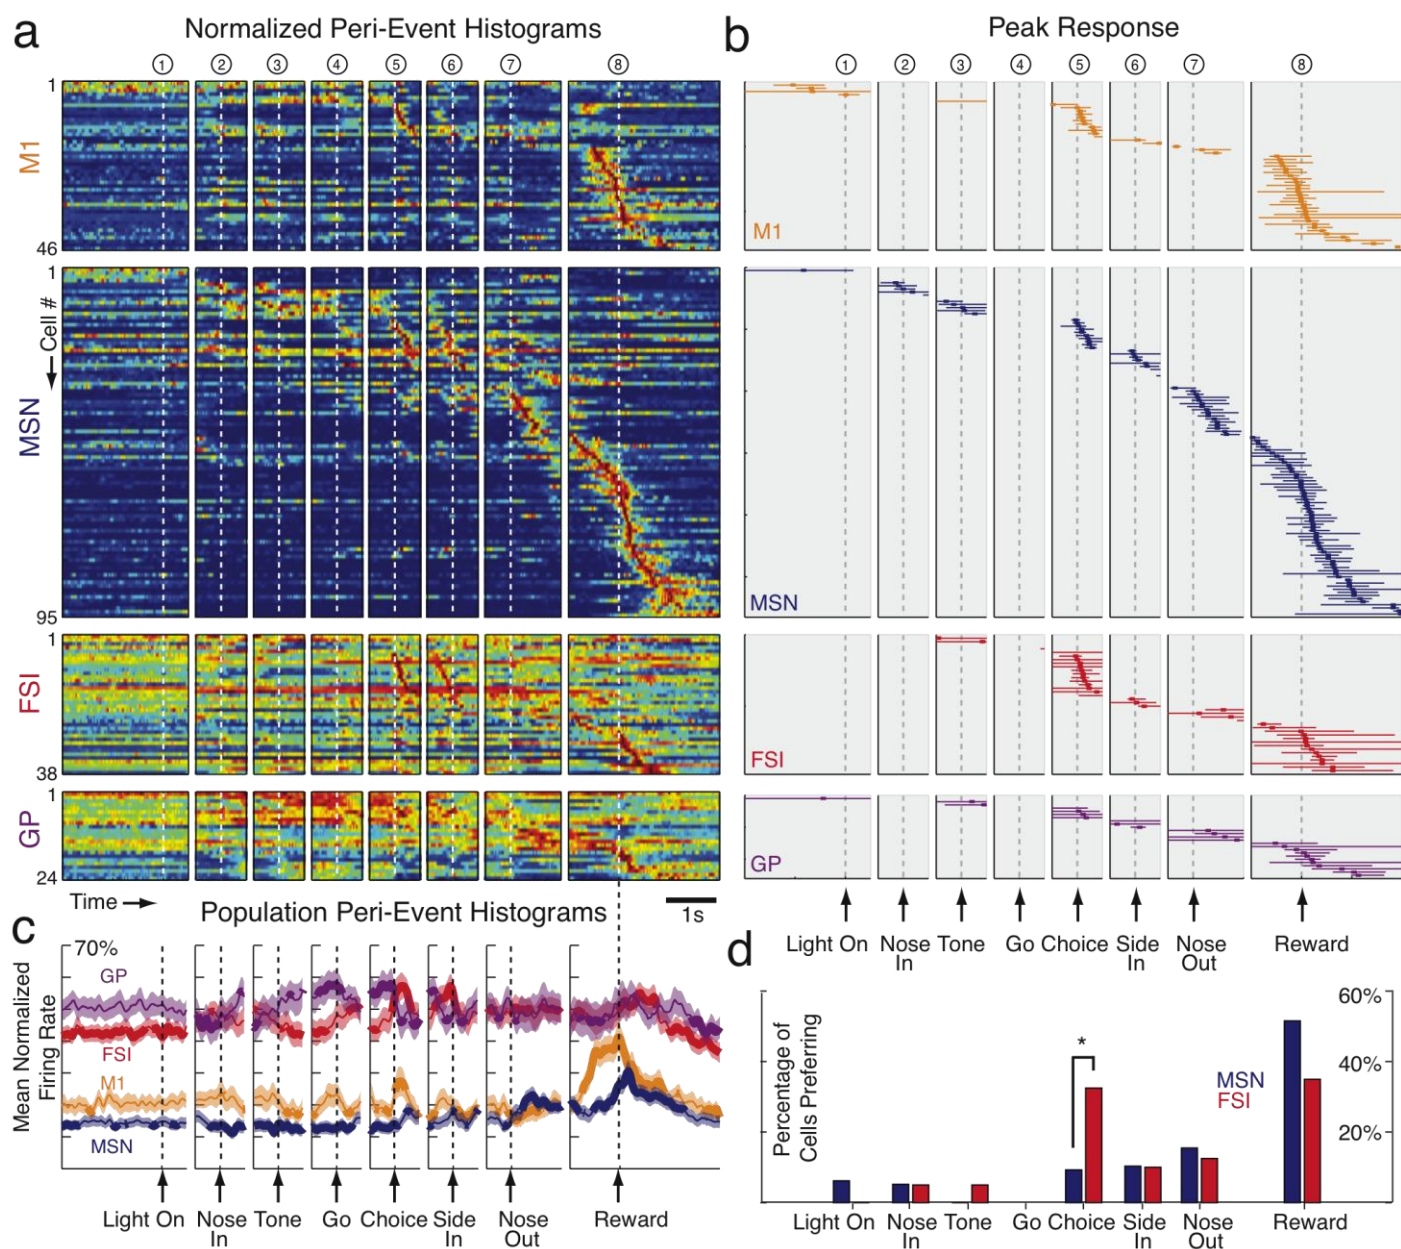

**Supplementary Figure 4:** Selective PETH response profiles. Format is identical to Figure 4, except that the peak firing rates were calculated for each of four subsets of trials, during which (1) the high tone played, (2) the low tone played, (3) movement was contraversive, or (4) movement was ipsiversive. PETHs and peak firing epochs were then calculated using only the subset with the highest peak firing rate. This serves two purposes. First, it includes cells for which the 5 Hz peak inclusion criterion was reached, but only on a specific subset of trials. Second, it helps to find the preferred event for some neurons, in which firing rate increases on one subset of trials were matched by decreases on another subset. Under these conditions, the choice execution event remained associated with a significantly different proportion of FSI and MSN peak firing (\*  $p = 0.012$ , two-sample proportion, adjusted for multiple comparisons), and all other pairs remained not significant ( $p > 0.05$ , adjusted for multiple comparisons).



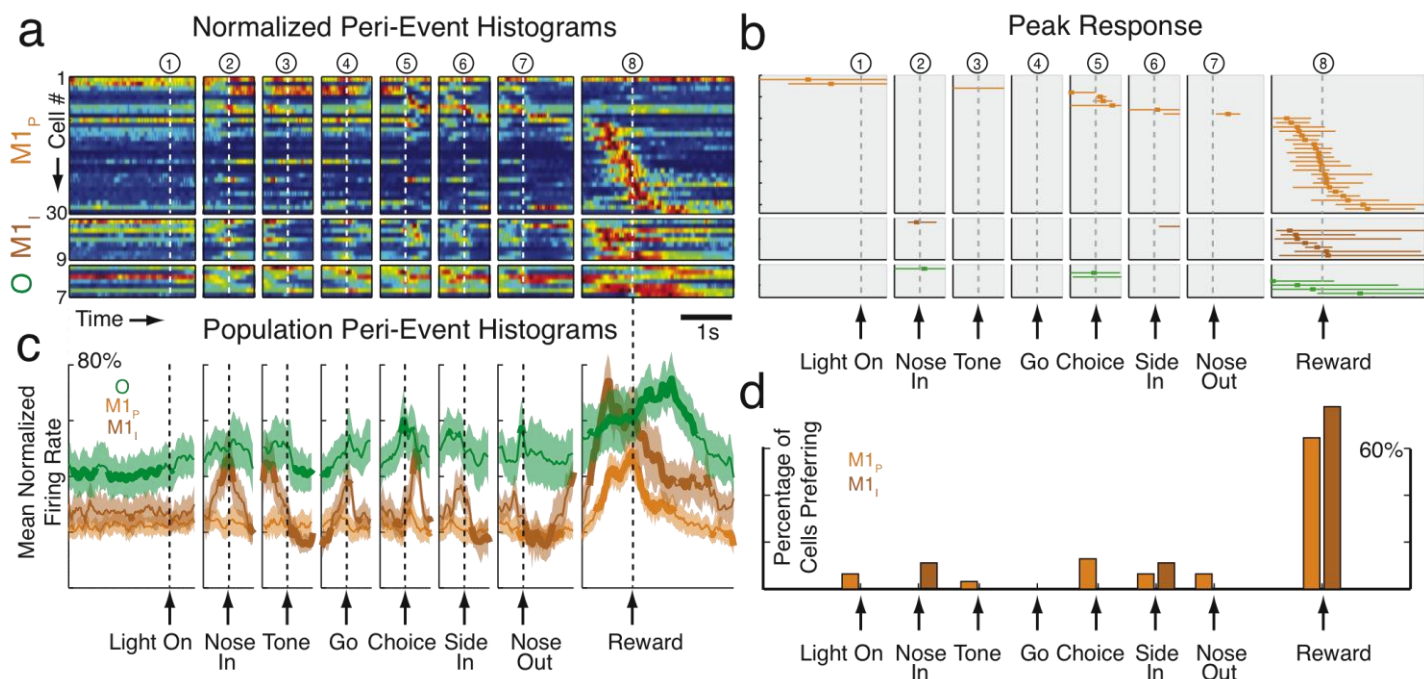

**Supplementary Figure 5:** Analysis of O, M1, and M1 neuronal classes. (a-d) Same analysis described in Figure 4, but for additional cell classes. O cells may represent an additional class of striatal interneurons (see Berke, 2008); M1 and M1 are motor cortex presumed projection and interneuron populations (see Figure 2). d) Presumed cortical interneurons did not show the same pattern of event preference as striatal FSIs, and there were no significant differences in the events that cortical subpopulations preferred ( $p > 0.05$  for all comparisons; note however that the number of cells analyzed is not large). As in previous work (Berke, 2008), O cells preferred the rewarding event, although slightly less uniformly in this task.

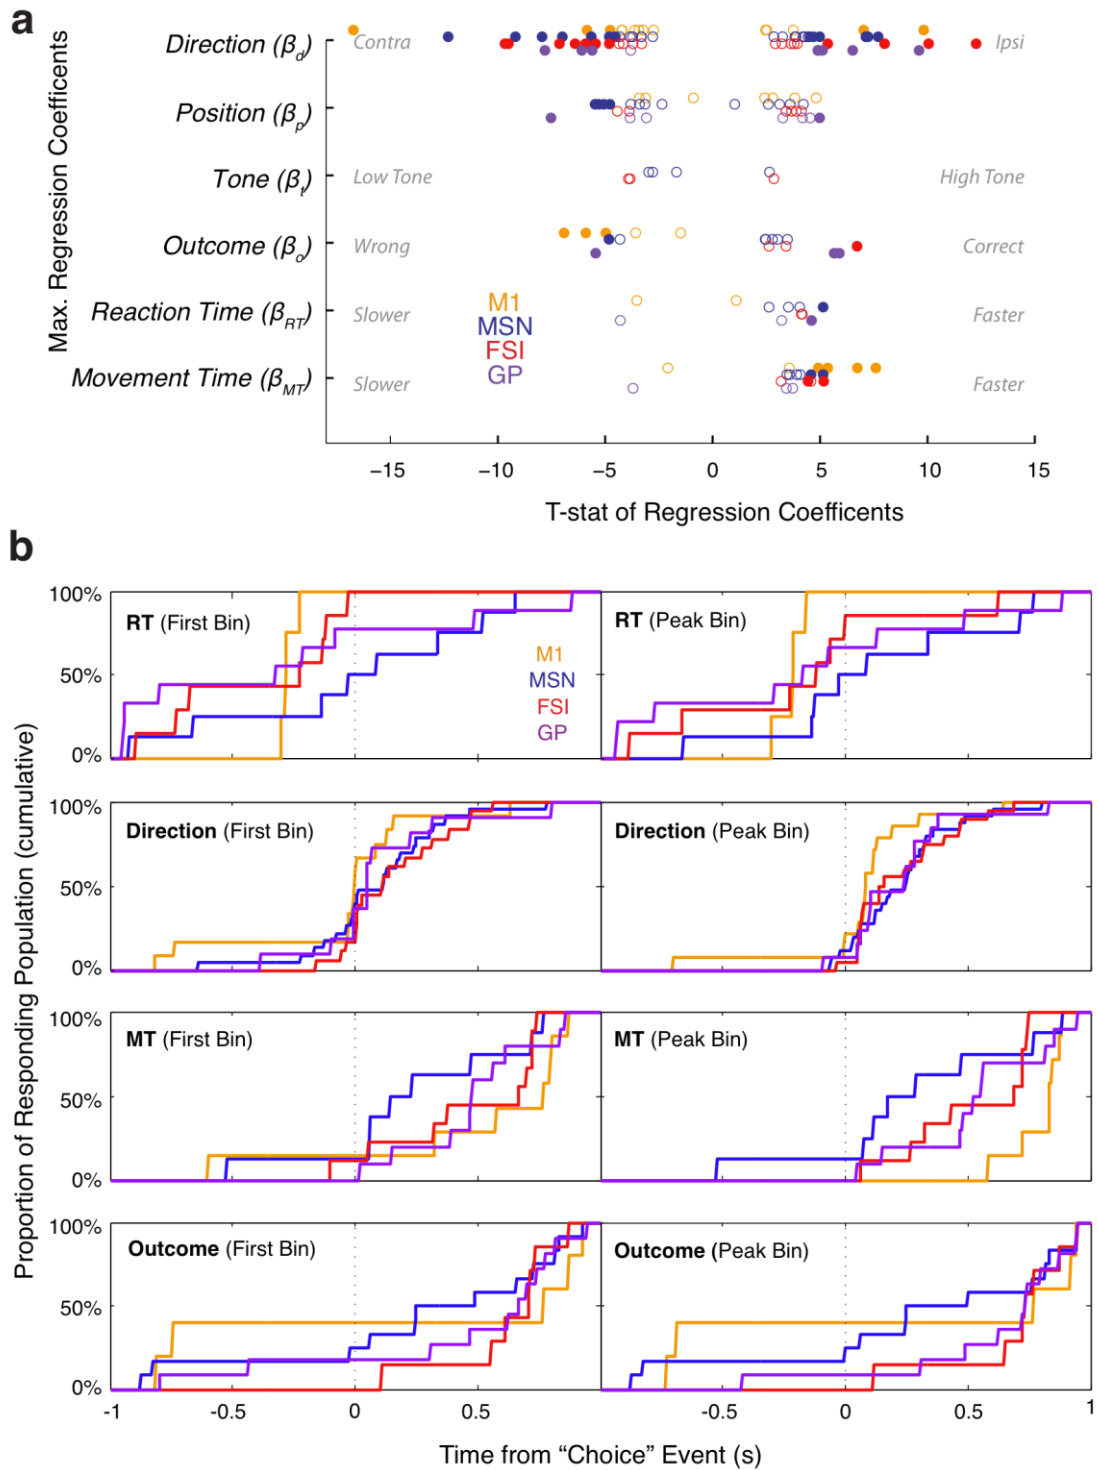

**Supplementary Figure 6:** **a)** Information coding by single cells, around choice event. Maximum t-statistics are displayed for four cell classes (M1, MSN, FSI, GP) for six regression coefficients: Direction ( $\beta_d$ ), Position ( $\beta_p$ ), Tone ( $\beta_T$ ), Outcome ( $\beta_o$ ), Reaction Time ( $\beta_{RT}$ ), Movement Time ( $\beta_{MT}$ ). Only the maximum t-stat for each cell is plotted. Solid markers indicate that the coefficient was significant ( $p < 0.01$ , regression t-test, corrected for multiple comparisons). **b)** Timing of information coding in each cell population. Cumulative distribution functions for each of four cell populations, examining when each cell showed significant regression coefficients for either: (a) Reaction Time, (b) Direction, (c) Movement Time, or (d) Outcome (Correct/Wrong). Graphs at left use the first time bin at which each neuron showed significantly selective firing, while those at right use the time bin with peak selectivity (i.e. most significant). To be included in these graphs, a neuron had to have a significant coefficient t-stat ( $p < 0.01$ ) after adjusting for multiple comparisons. No overall differences were significant between the cell population distributions ( $p > 0.05$ , Two-sample Kolmogorov-Smirnov).

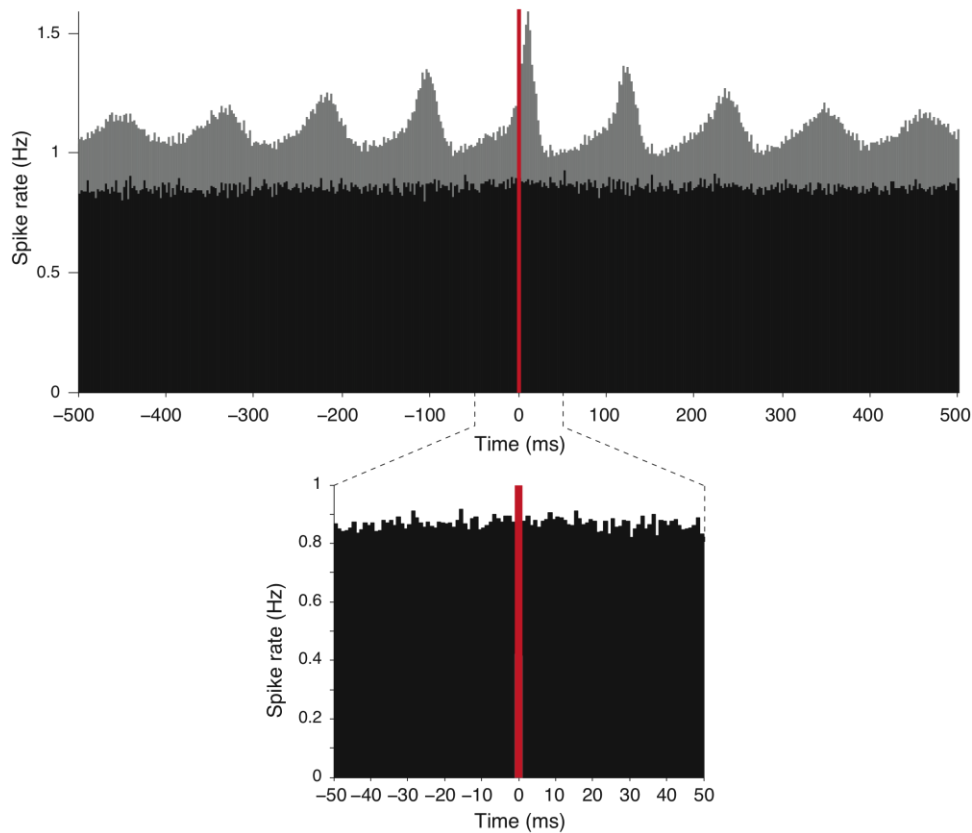

**Supplementary Figure 7:** Fast FSI-MSN interactions are also not apparent in a separate data set (described in Wiltschko *et al.*, 2010). Averaged cross-correlograms (from 133 FSI:MSN pairs) are shown using FSI spikes as reference (time zero), as in Fig. 7. Top shows results either including all data (grey) or excluding periods of high-voltage spindle oscillations and drug manipulations (black). As previously observed (Berke *et al.* 2004), FSI spikes tend to precede MSN spikes during HVS. Bottom shows close-up of period of potential fast monosynaptic interactions, but no such interactions are apparent.

**Supplementary Figure 8 (in separate file).** Neuron database for the simple choice task. Top row: (top left) Neuron information as follows: Cell: identifier of cell in the database; AP,ML,DV: location of neuron; w: tetrode wire number (1-4) of the peak waveform; n: number of spikes recorded; PropISI > 2s: proportion of time spent in long inter-spike intervals; 1/2pw: waveform measurement of 1/2 the peak width; p-v: waveform measurement of peak to valley time;  $\beta_t$ ,  $\beta_d$ ,  $\beta_p$ : regression coefficients for tone, direction, and position respectively; bold text indicates coefficients are significant. SI: selectivity index; Session FR: session-wide mean firing rate; Pk Ev: peak event from response profile analysis (using trial-type-specific PETHs); Pk FR: peak firing rate (with time relative to peak event). (top left center) Spike waveform, showing both wide-band (colored) and Butterworth filtered (600–6,000 Hz, grey); x-axis: time (5 ms) y-axis: arbitrary AD units. (top center) x-axis: Wide-band waveform 1/2 peak width (0–500  $\mu$ s) y-axis: Wide-band waveform peak to valley time (100–1350  $\mu$ s). Yellow circle indicates position of current cell in cluster. (top center right) x-axis: session firing rate (log scale: 0.01–100 s) y-axis: wide-band waveform peak to valley time (100–1350  $\mu$ s). (top right) Inter-spike-interval (ISI) histogram, on log scale: 1 ms–10 s. Center and bottom rows: Spike rasters (center row) and PETHs (bottom row) for the eight trial epochs shown in Fig. 1. PETHs calculated using all trials are shown in black, while high tone, low tone, contra, and ipsi trials are shown in orange, blue, gold, and green respectively. From left to right: (1) Cue on, (2) Nose In. Rasters for events 1,2 show trials in chronological order. (3) Tone. Rasters are divided into high-tone- (orange bar) and low-tone- (blue bar) trials. (4) Go cue. Rasters are sorted by reaction time. Detection of event 5 (“Choice” execution) is indicated with a gold (green) marker for contraversive- (ipsiversive-) trials. Side in (event 6) detection noted by a blue (red) marker for correct (incorrect) trials. (5) Choice. Rasters for events 5–8 are divided into contraversive- (gold bar) and ipsiversive- (green bar) trials. (6) Side In. (7) Nose Out. (8) Reward. Bracketed numbers indicate the totals number of epochs displayed in above raster. Time range for each epoch is -0.5 s to +0.5 s around each event, except for event 8 (-1 s to +2 s).



**Cell: C0320070704T09a**

AP: 1.6 ML: 3.7 DV: 6.7

w: 1 n: 92773  $P_{ISI>2}$ : 01/2pw: 77 $\mu$ s p $\rightarrow$ v: 150 $\mu$ s $\beta_T$ : 2  $\beta_D$ : 3.3 $\beta_P$ : -3.6 SI: 0.19

Session FR: 21.4 Hz

Pk Ev: 3 - Tone (Contra)

Pk FR: 34.4Hz (-0.45s) **FSI**

Waveform

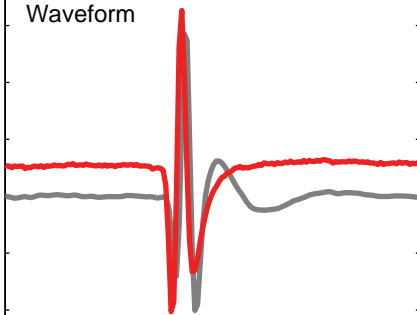

HP/PV

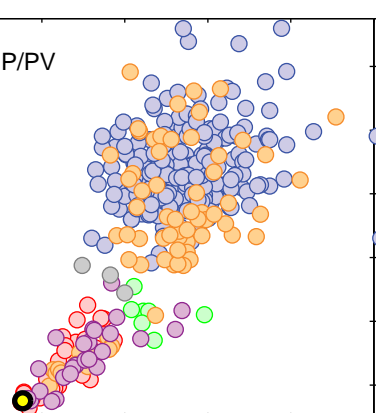

FR/PV

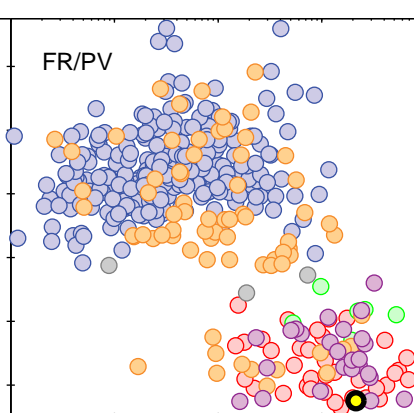

ISI Histogram [3736]

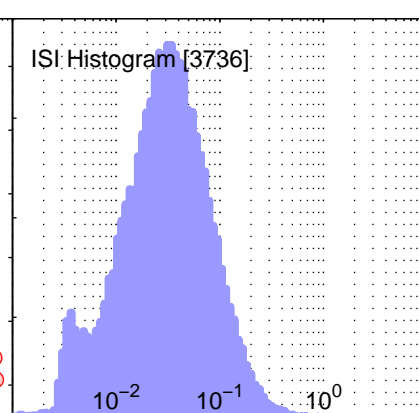

20

40

60

80

100

120

140

1 Cue On [141]

2 Nose In [141]

3 Tone [80,61]

4 Go [141]

5 Choice [64,77]

6 Side In [64,77]

7 Nose Out [64,77]

8 Reward [52,49]

35

30

25

20

15

10

5

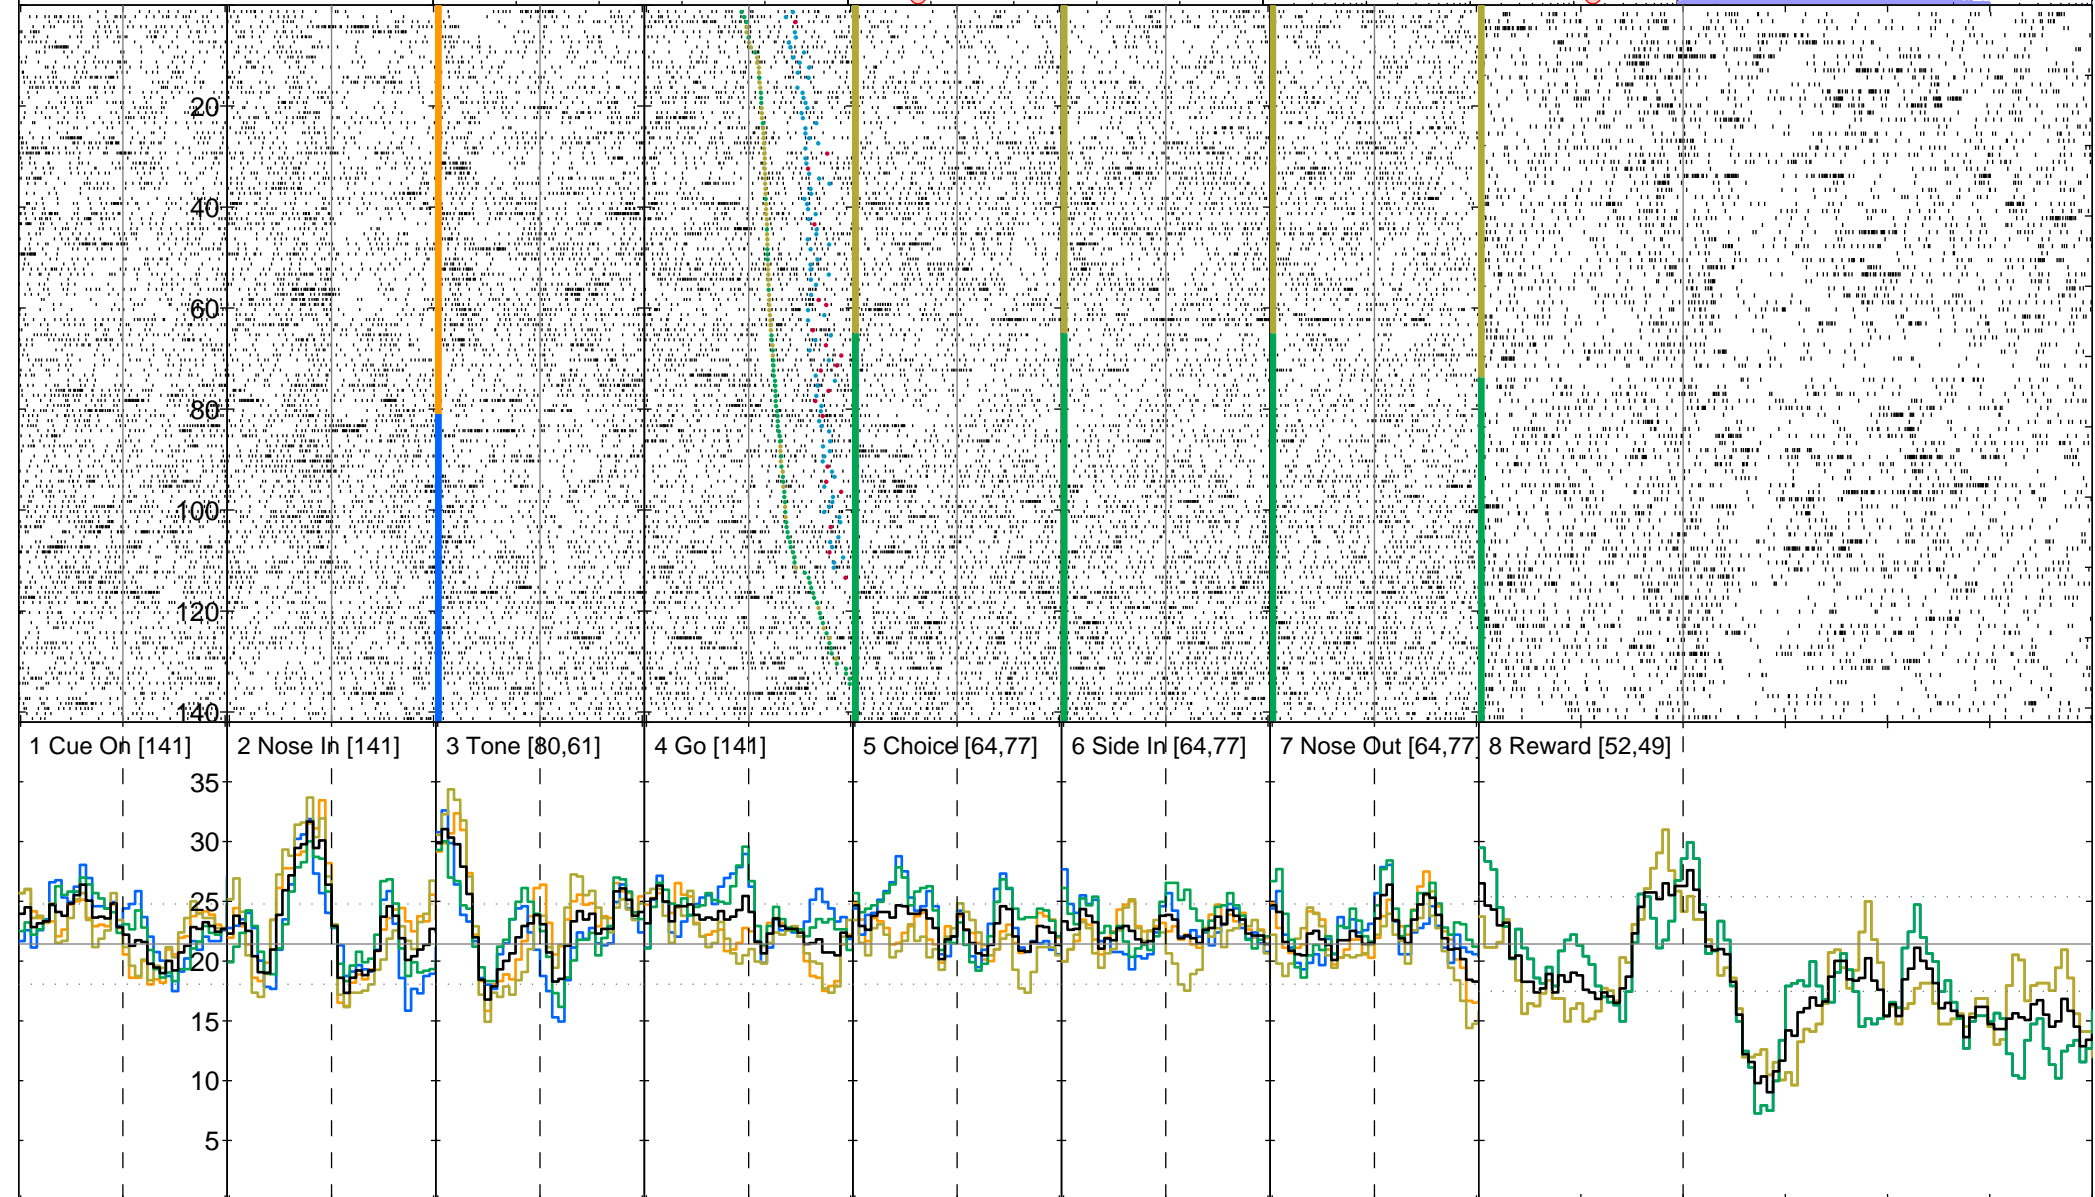

Cell: C0520070405T12a

AP: -0.48 ML: 3.9 DV: 5

w: 4 n: 67463  $P_{ISI>2}$ : 0

1/2pw: 85 $\mu$ s p->v: 128 $\mu$ s

$\beta_T$ : 2.9  $\beta_D$ : -2

$\beta_P$ : -2.7 SI: -0.19

Session FR: 15.3 Hz

Pk Ev: 3 - Tone (Tone2)

Pk FR: 23.9Hz (0.42s) **FSI**

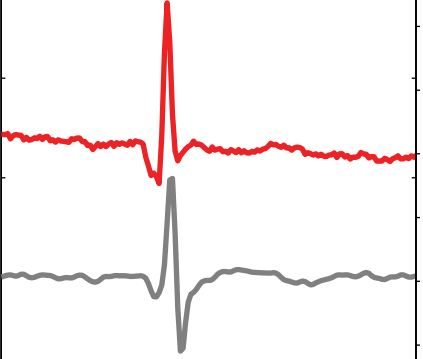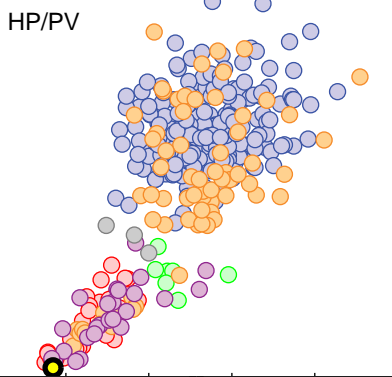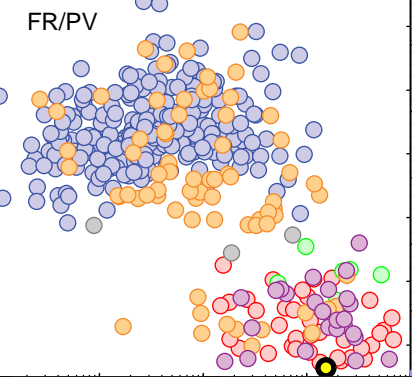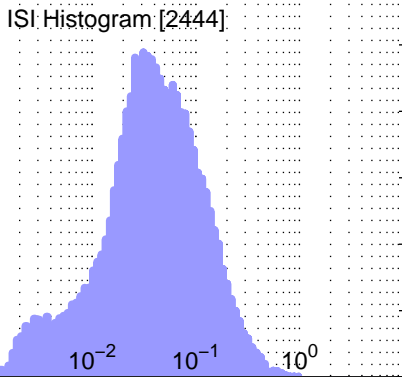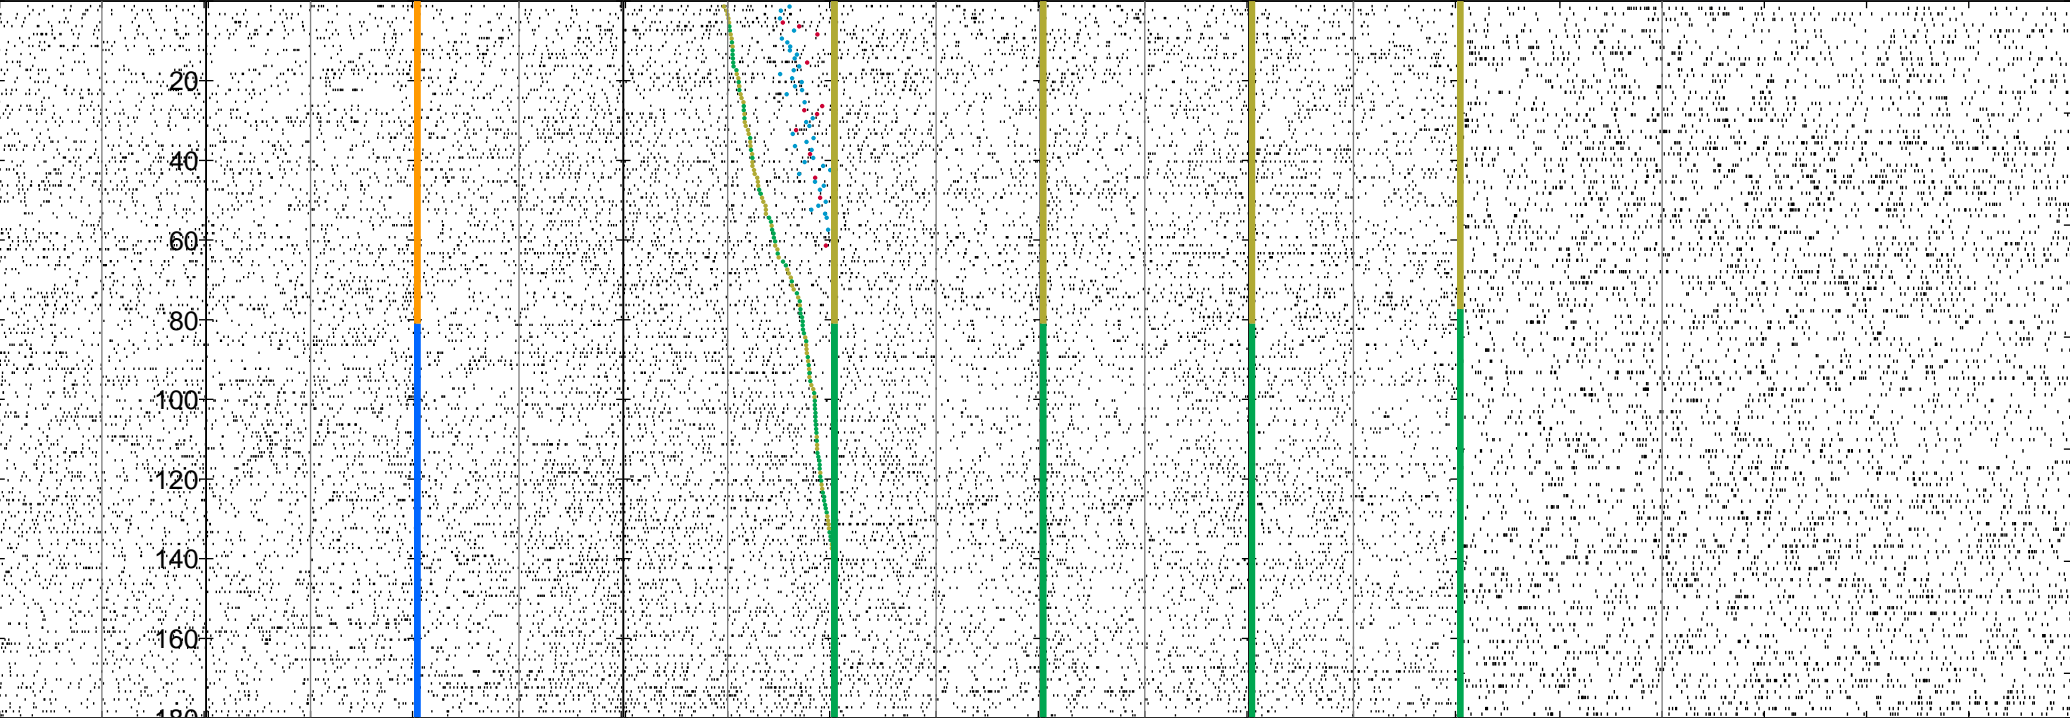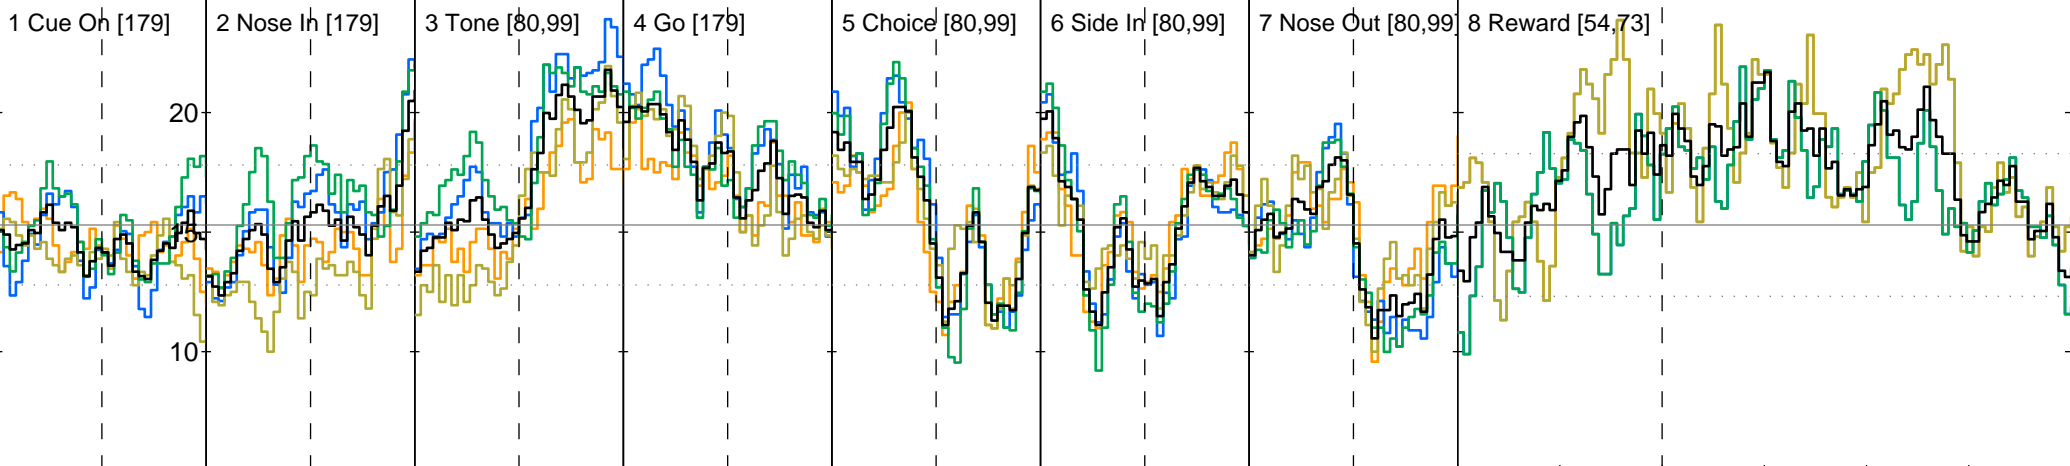

**Cell: C0420070314T06b**

AP: 2 ML: 1.8 DV: 5.5  
w: 3 n: 13318  $P_{ISI>2}$ : 0.49  
1/2pw: 141 $\mu$ s p->v: 334 $\mu$ s  
 $\beta_T$ : -2.5  $\beta_D$ : 3.2  
 $\beta_P$ : 3.9 SI: 0.72  
Session FR: 1.79 Hz  
Pk Ev: 4 - Go (Ipsi)  
Pk FR: 9.66Hz (-0.78s) **FSI**

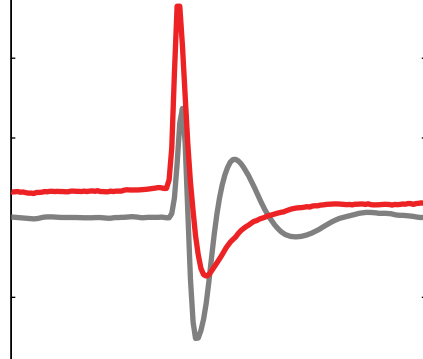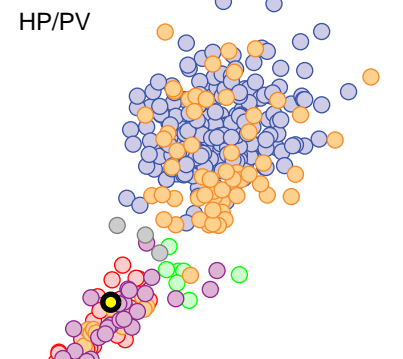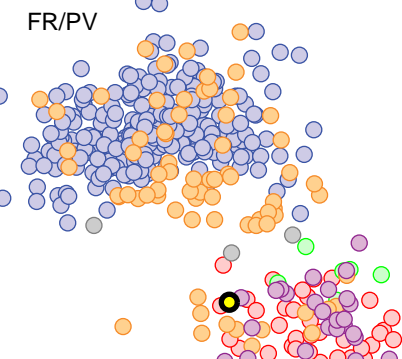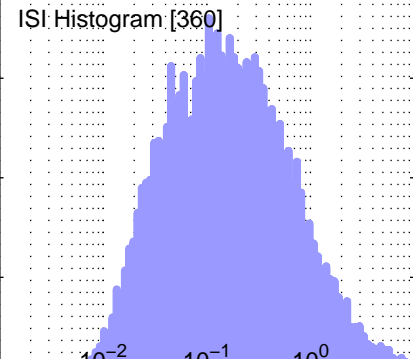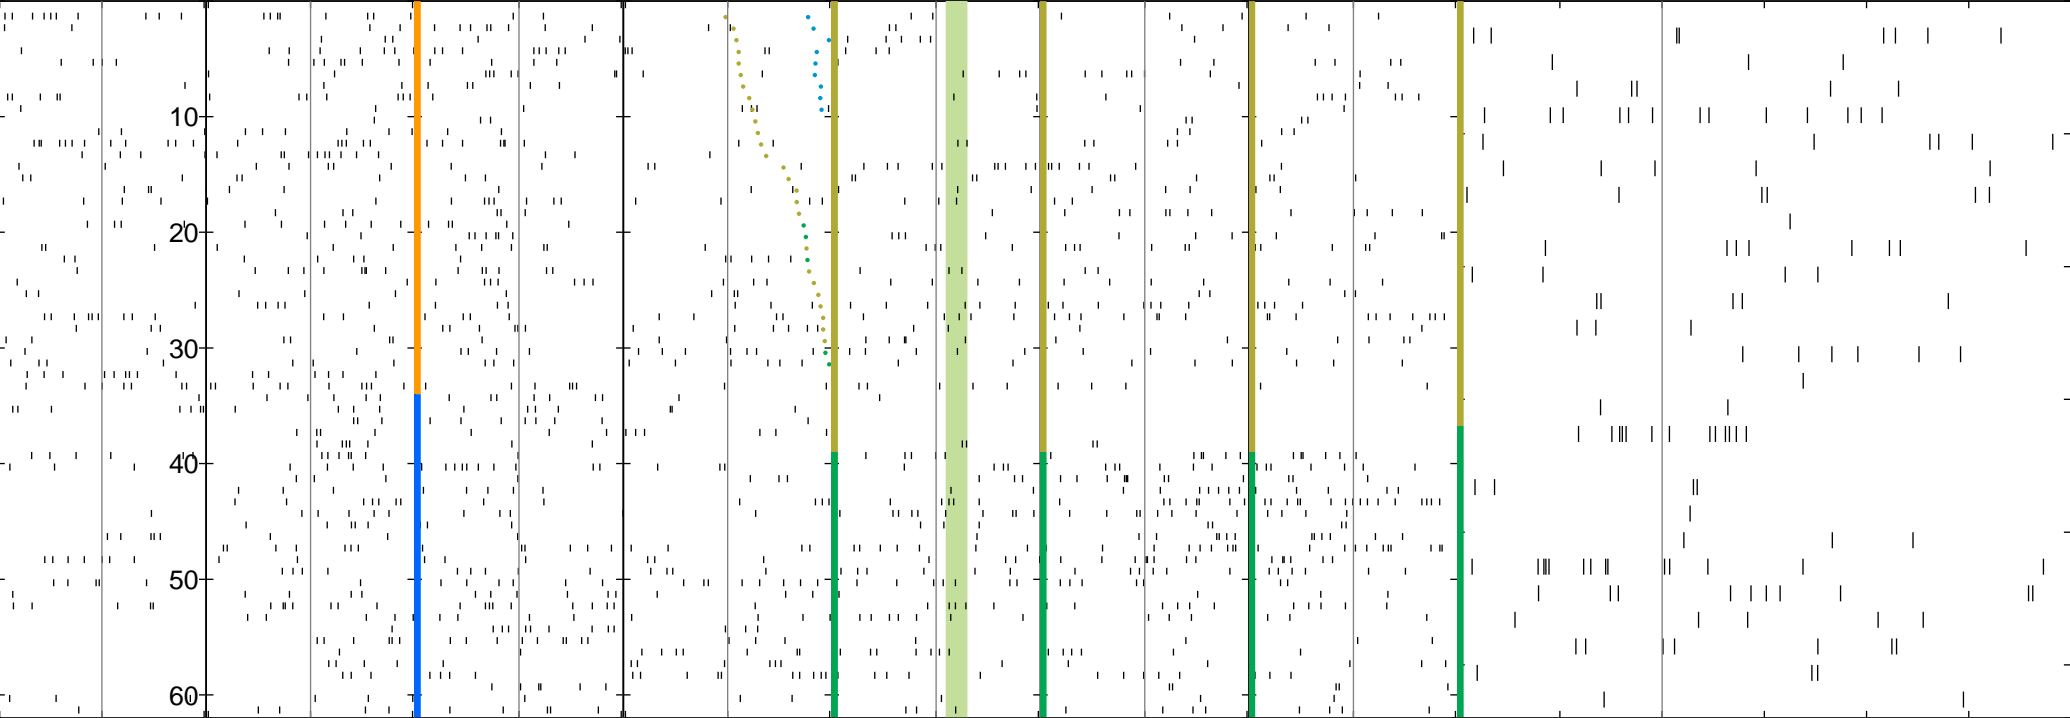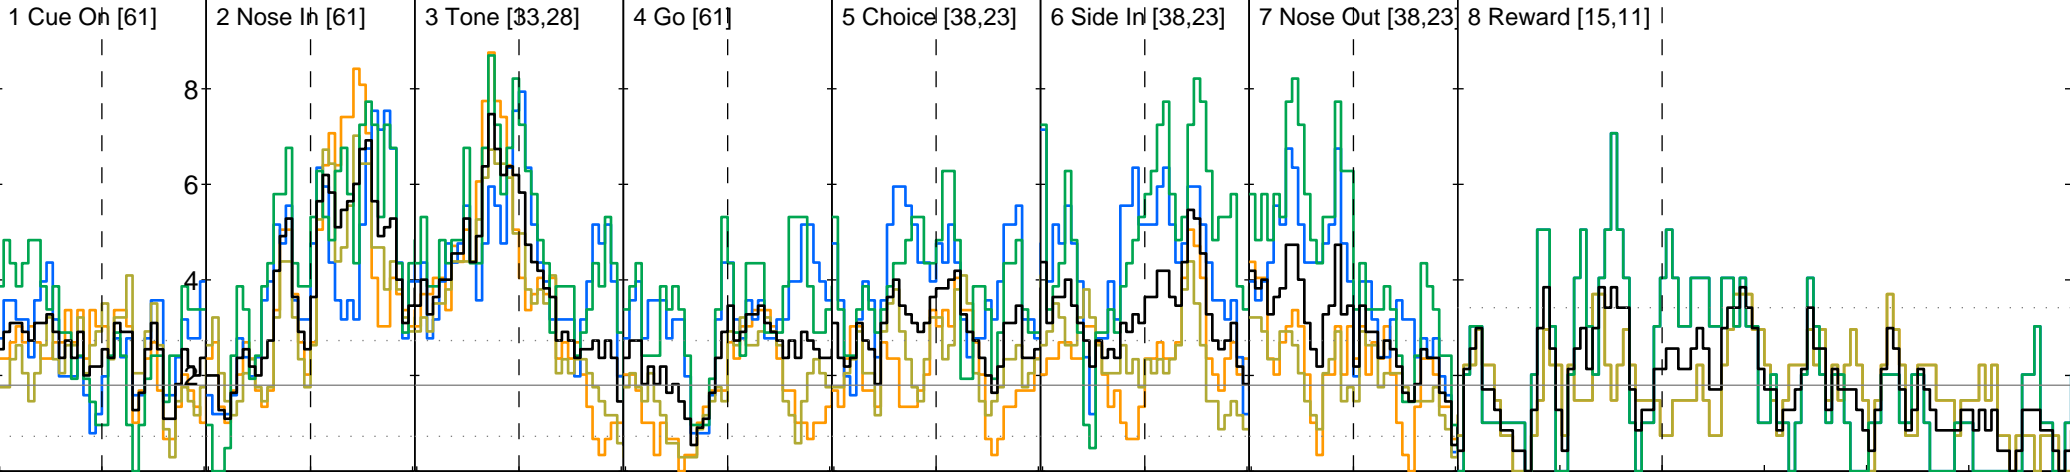



Cell: C0320070622T09c

AP: 1.6 ML: 3.7 DV: 5.2

w: 3 n: 40386  $P_{ISI>2}$ : 0.0011

1/2pw: 125 $\mu$ s p $\rightarrow$ v: 352 $\mu$ s

$\beta_T$ : 3  $\beta_D$ : 2.8

$\beta_P$ : 3.4 SI: 0.26

Session FR: 10.2 Hz

Pk Ev: 5 - Choice (Tone2)

Pk FR: 30.2Hz (-0.96s) **FSI**

Waveform

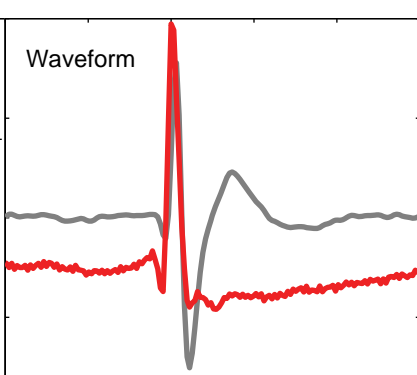

HP/PV

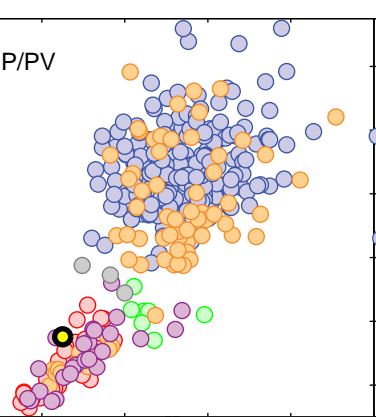

FR/PV

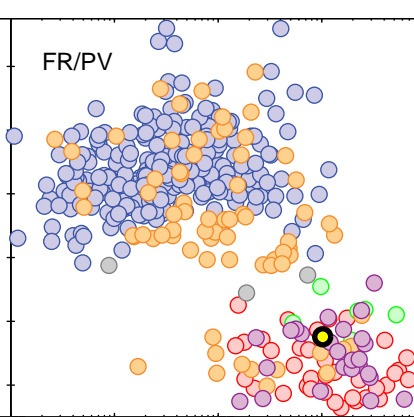

ISI Histogram [1352]

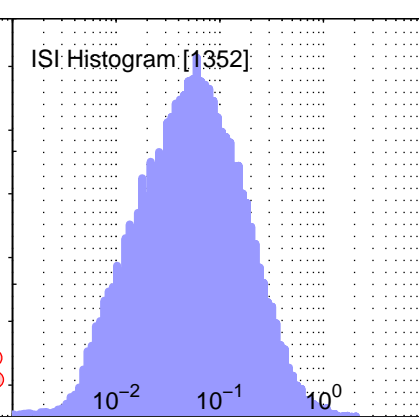

20

40

60

80

100

1 Cue On [114]

2 Nose In [114]

3 Tone [57,57]

4 Go [114]

5 Choice [67,47]

6 Side In [67,47]

7 Nose Out [67,47]

8 Reward [49,39]

35

30

25

20

15

10

5

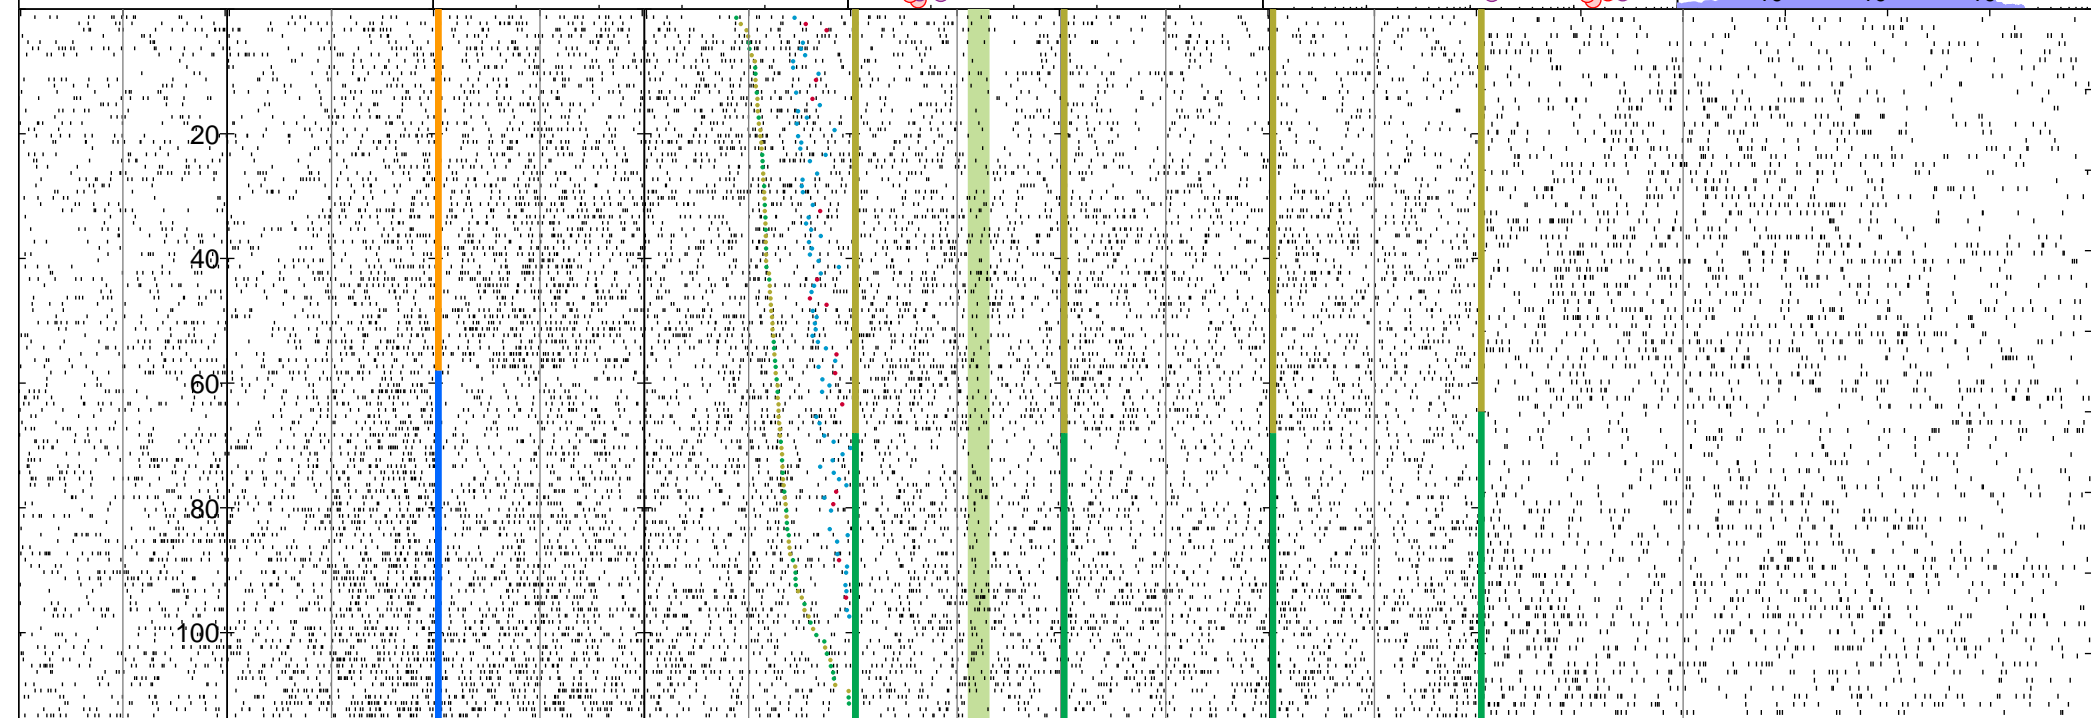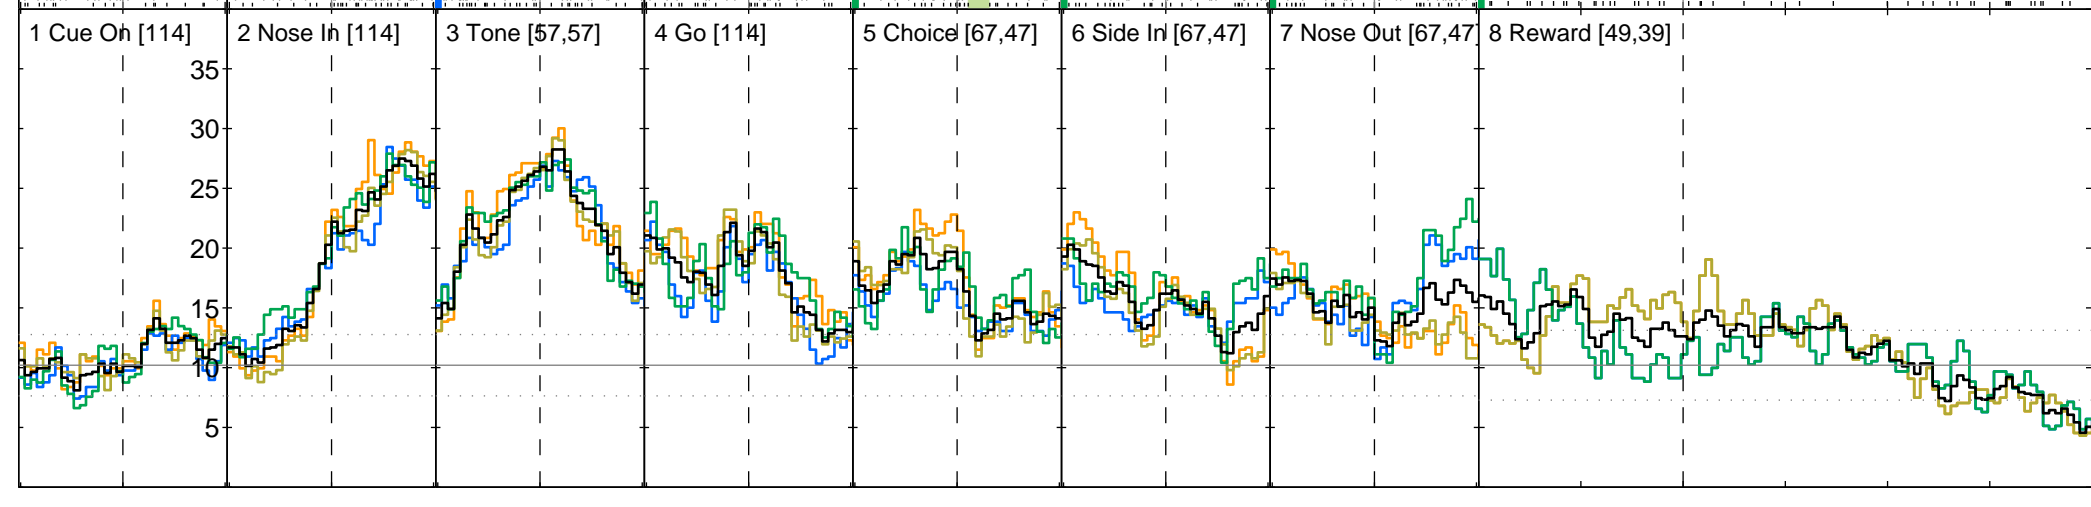

Cell: C0520070406T12c

AP: -0.48 ML: 3.9 DV: 5.1

w: 4 n: 31625  $P_{ISI>2}$ : 0.0072

1/2pw: 120 $\mu$ s p $\rightarrow$ v: 197 $\mu$ s

$\beta_T$ : -3.1  $\beta_D$ : 3.2

$\beta_P$ : -2.9 SI: 0.29

Session FR: 7.24 Hz

Pk Ev: 5 - Choice (Tone1)

Pk FR: 15.1Hz (-0.03s) **FSI**

Waveform

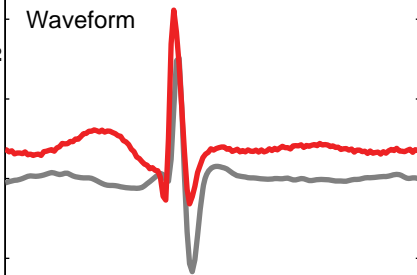

HP/PV

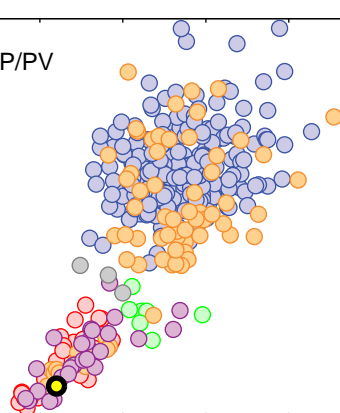

FR/PV

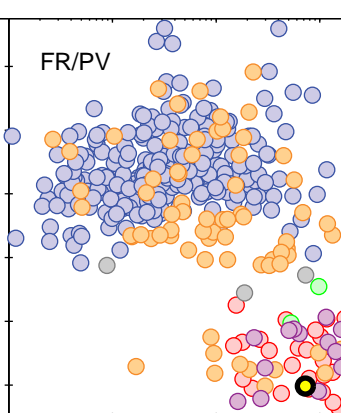

ISI Histogram [1075]

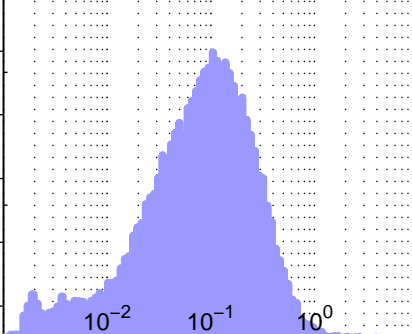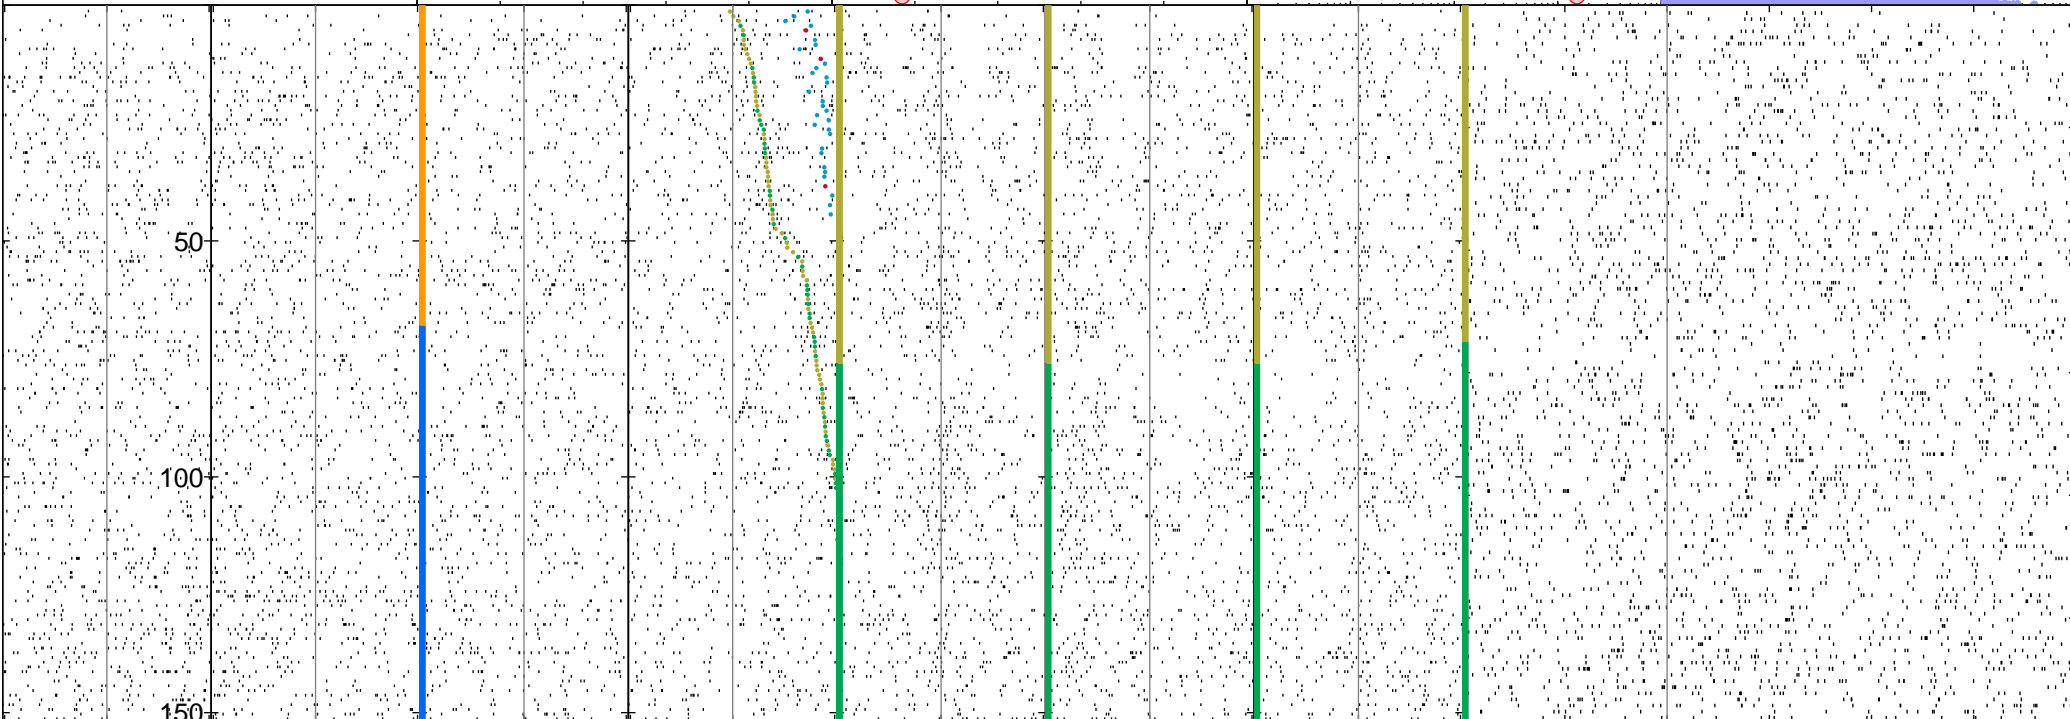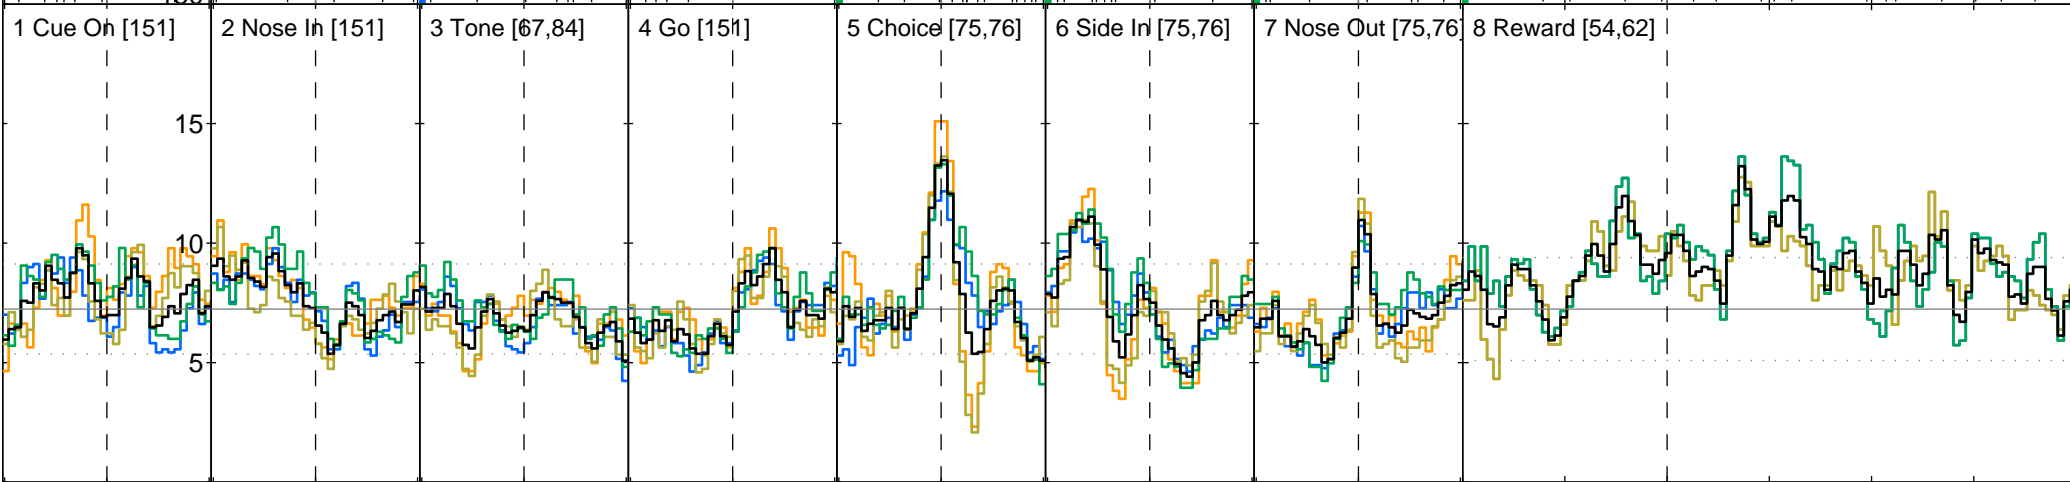

Cell: C0520070406T11d

AP: -0.48 ML: 4.6 DV: 4.5

w: 1 n: 116925  $P_{ISI>2}$ : 0

1/2pw: 98 $\mu$ s p $\rightarrow$ v: 160 $\mu$ s

$\beta_T$ : 2.1  $\beta_D$ : 4.7

$\beta_P$ : 3.6 SI: 0.46

Session FR: 26.8 Hz

Pk Ev: 5 - Choice (Ipsi)

Pk FR: 45.3Hz (0.00s) **FSI**

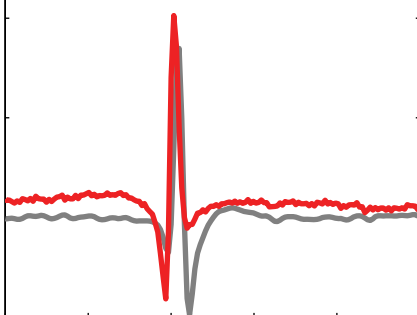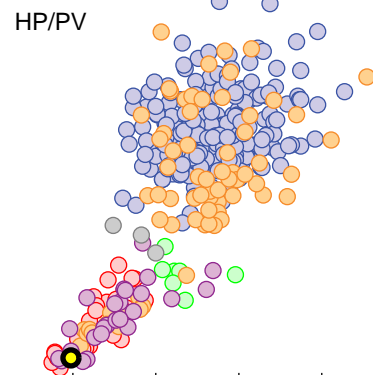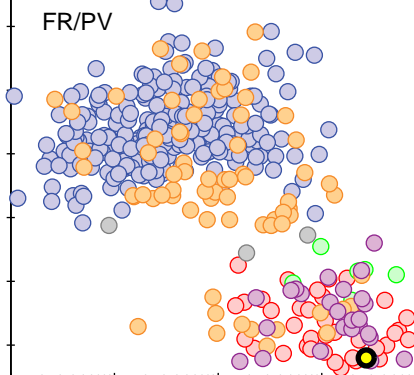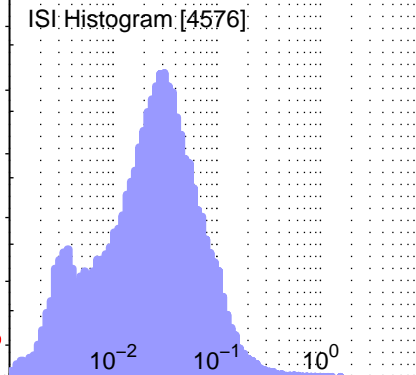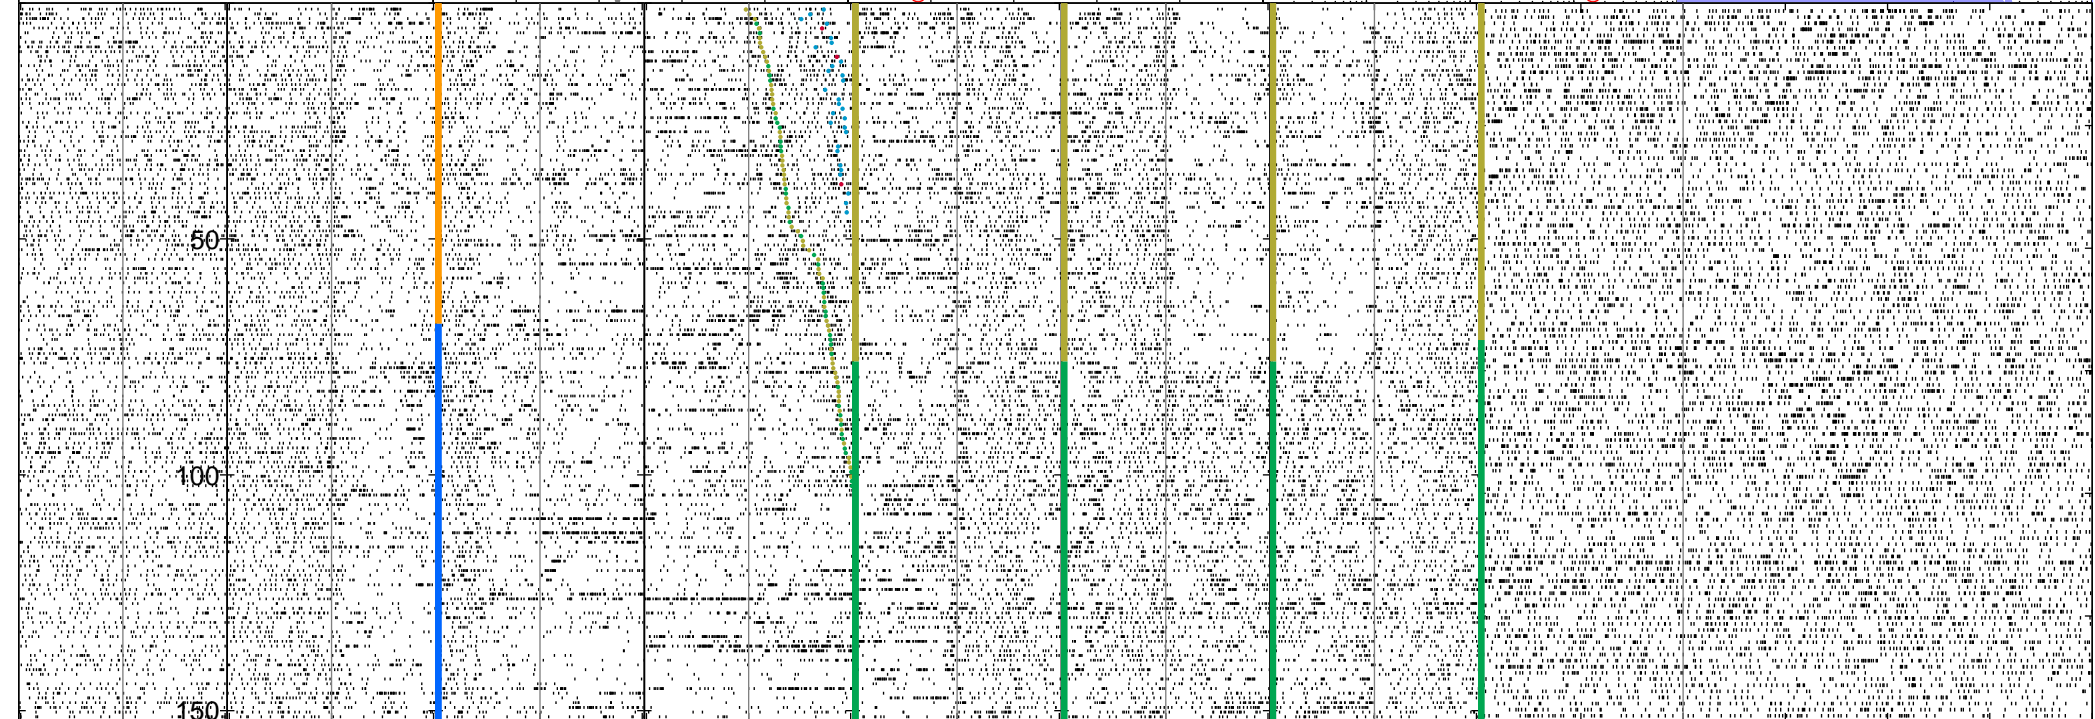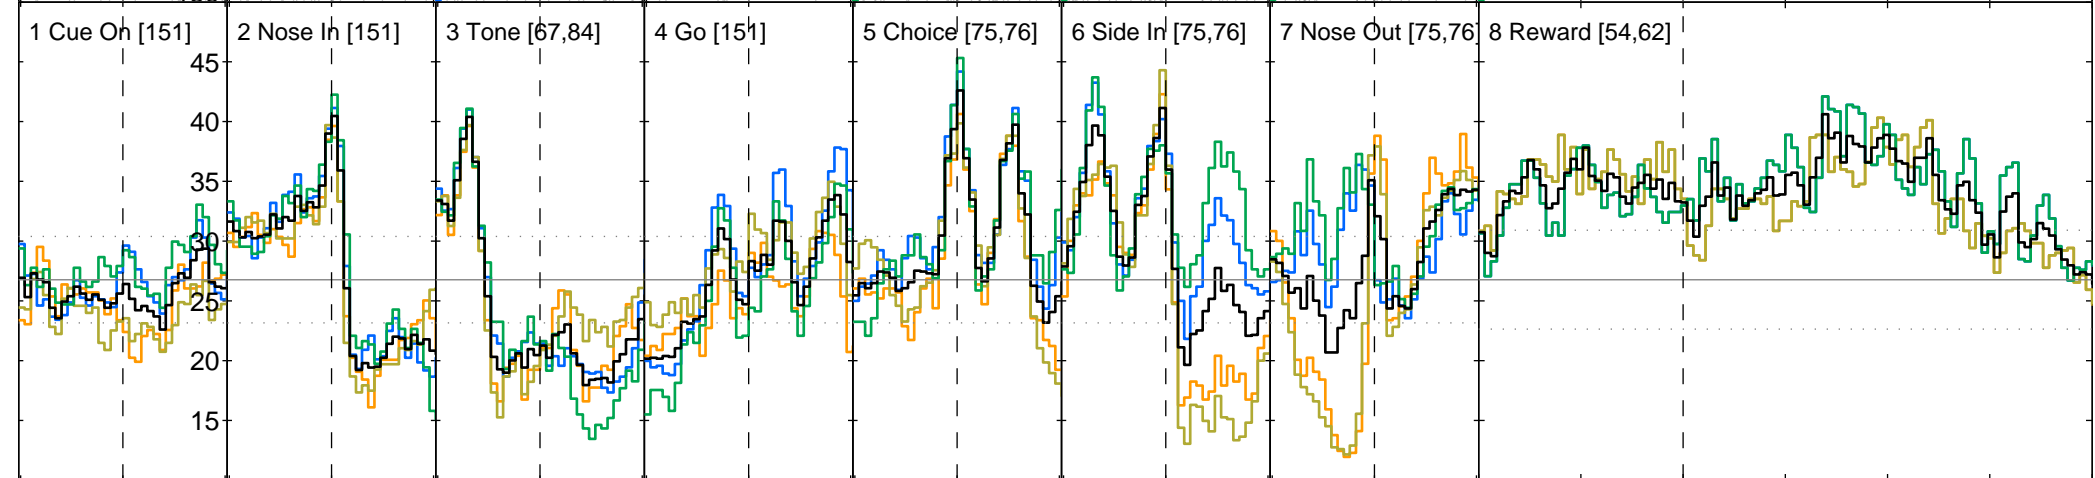



Cell: C0320070701T09a

AP: 1.6 ML: 3.7 DV: 6.3

w: 3 n: 309660 P<sub>ISI>2</sub>: 0

1/2pw: 139µs p->v: 246µs

β<sub>T</sub>: -2.7 β<sub>D</sub>: -4.4

β<sub>P</sub>: -2.6 SI: -0.094

Session FR: 55.2 Hz

Pk Ev: 5 - Choice (Tone1)

Pk FR: 95Hz (0.06s) FSI

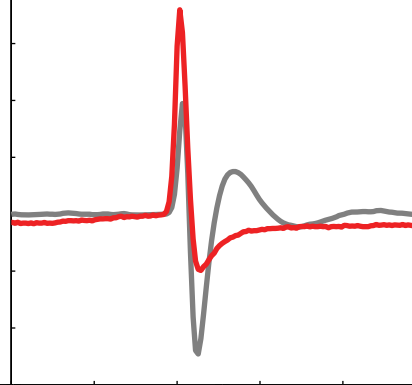

HP/PV

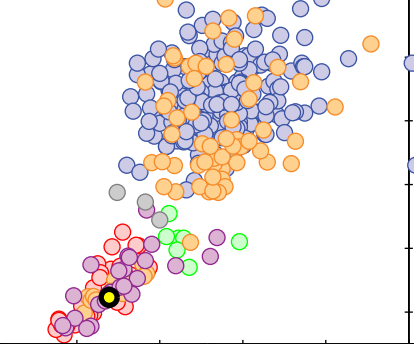

FR/PV

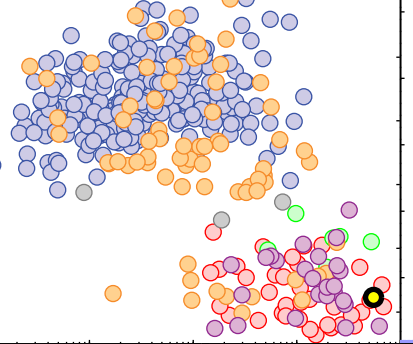

ISI Histogram [29072]

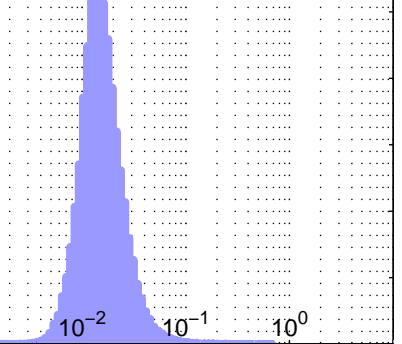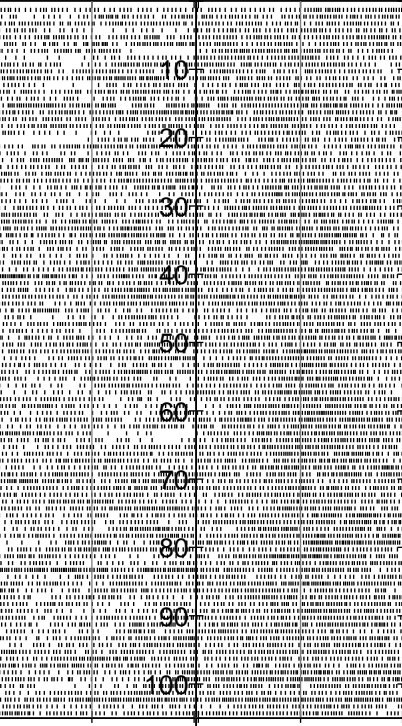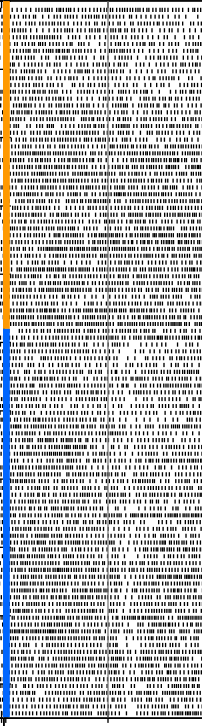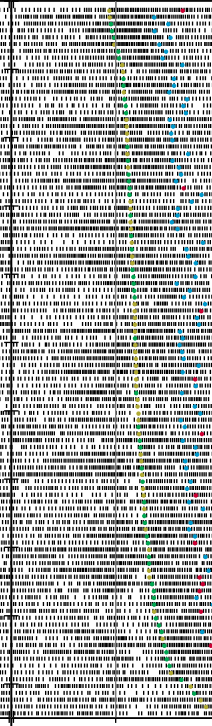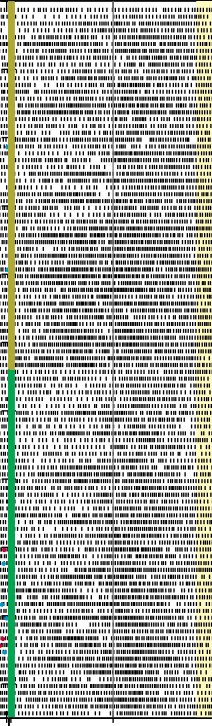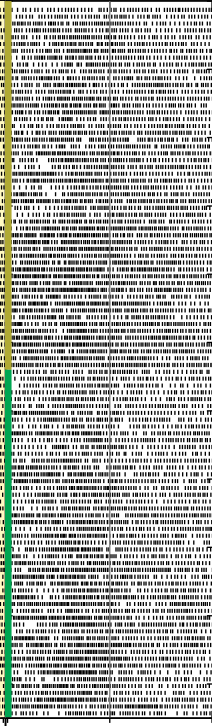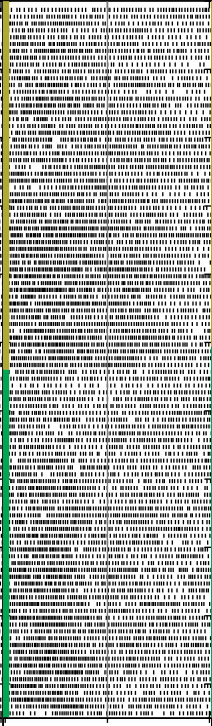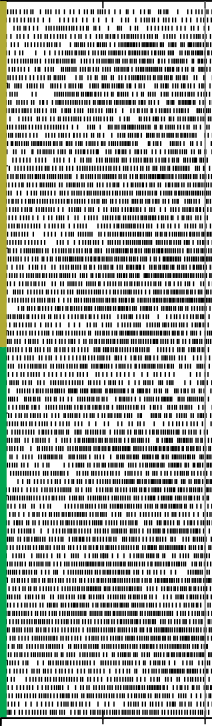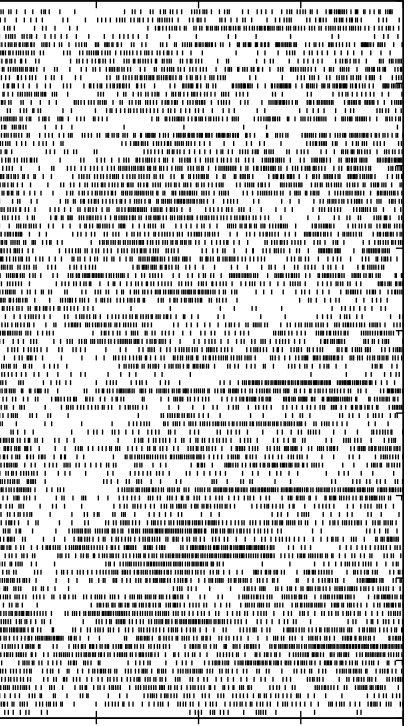

1 Cue Oh [104]

2 Nose In [104]

3 Tone [47,57]

4 Go [104]

5 Choice [53,51]

6 Side In [53,51]

7 Nose Out [53,51]

8 Reward [41,45]

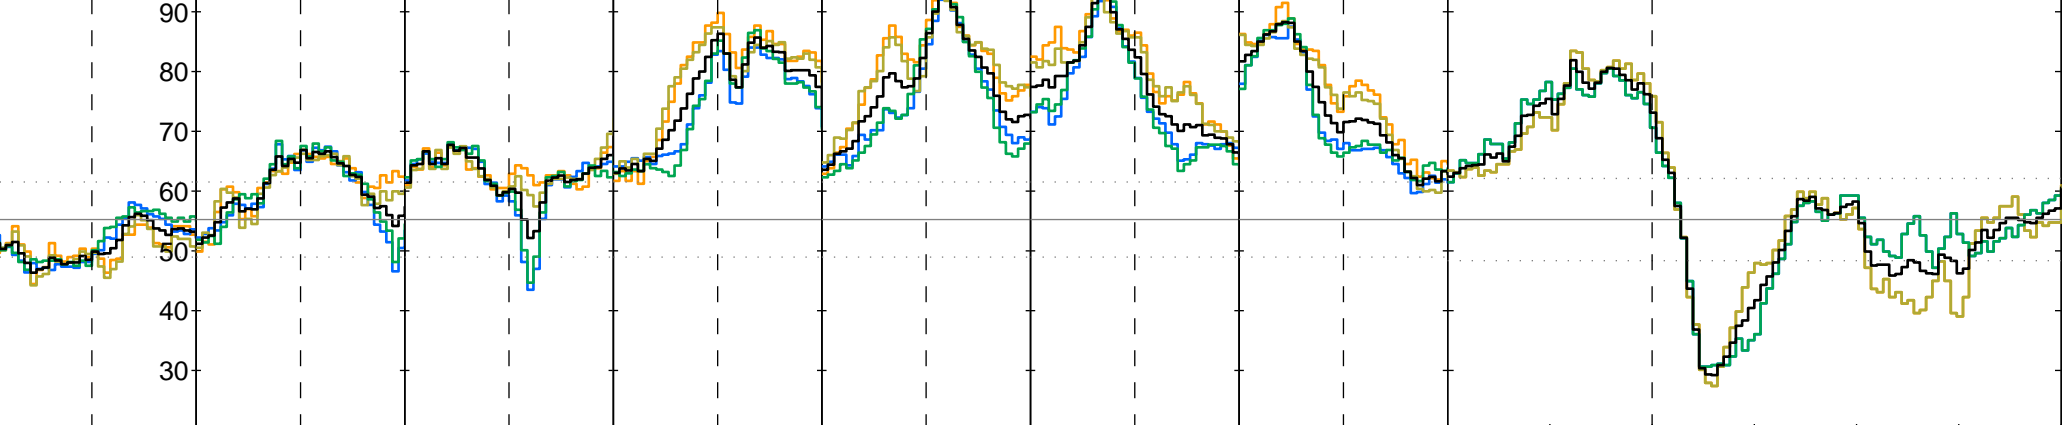

Cell: C0520070406T09a

AP: 0.72 ML: 2.4 DV: 4.7

w: 3 n: 184985  $P_{ISI>2}$ : 0

1/2pw: 115 $\mu$ s p $\rightarrow$ v: 200 $\mu$ s

$\beta_T$ : 2.7  $\beta_D$ : 8

$\beta_P$ : 3.7 SI: 0.36

Session FR: 42.4 Hz

Pk Ev: 5 - Choice (Ipsi)

Pk FR: 95.9Hz (0.06s) **FSI**

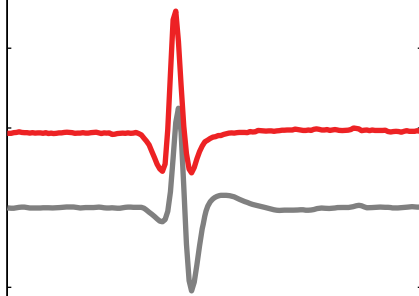

HP/PV

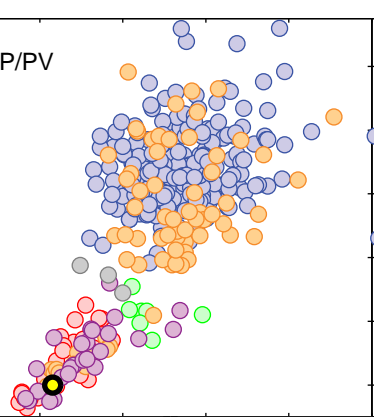

FR/PV

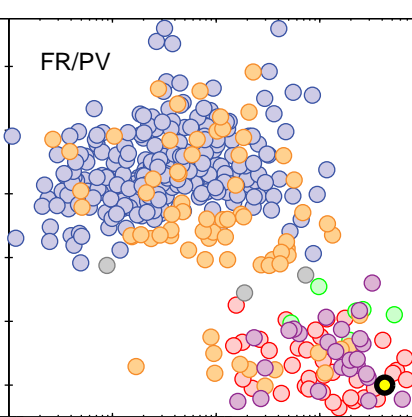

ISI Histogram [11466]

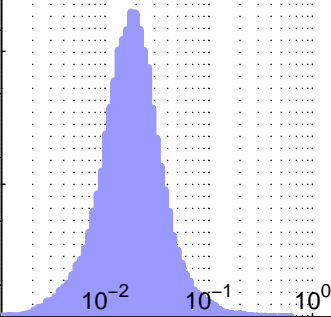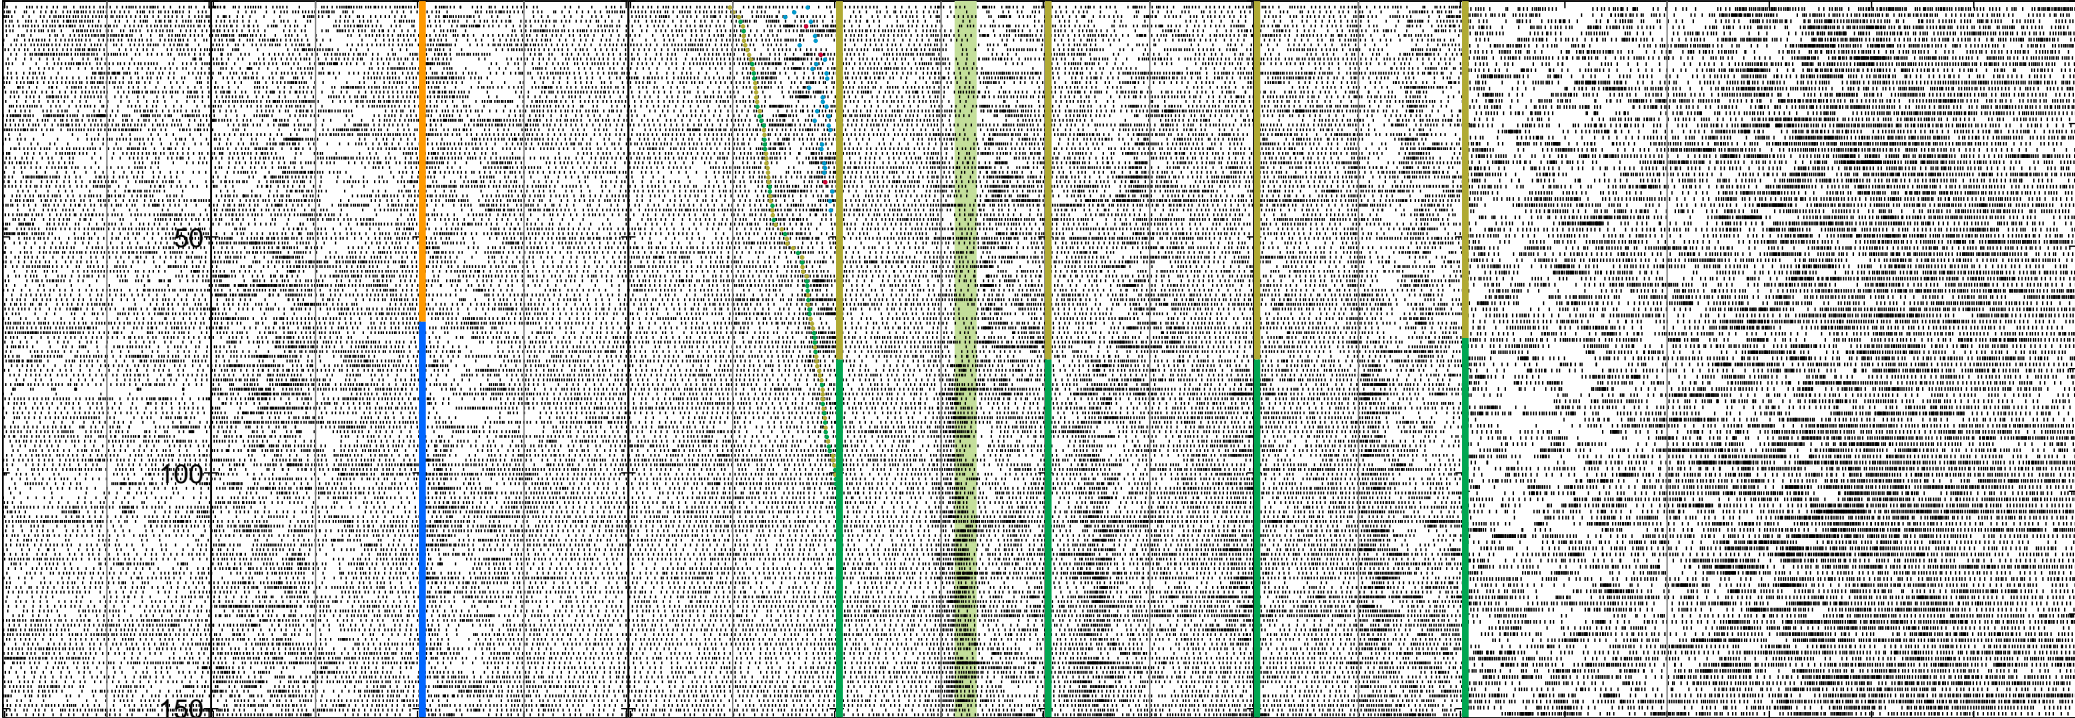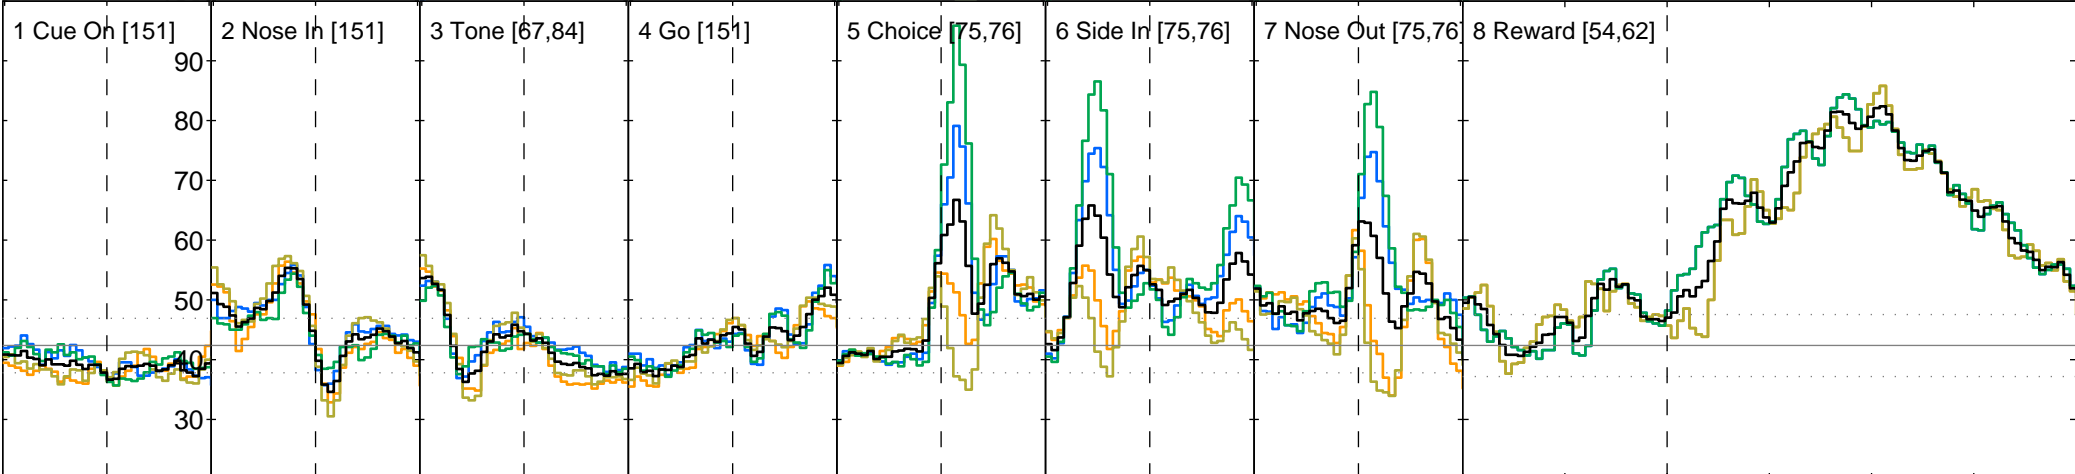

Cell: C0520070405T11b

AP: -0.48 ML: 4.6 DV: 4.4

w: 1 n: 14553  $P_{ISI>2}$ : 0.049

1/2pw: 162 $\mu$ s p $\rightarrow$ v: 373 $\mu$ s

$\beta_T$ : -2.6  $\beta_D$ : -2.5

$\beta_P$ : 3.4 SI: -0.44

Session FR: 9.1 Hz

Pk Ev: 5 - Choice (Contra)

Pk FR: 24Hz (0.09s) **FSI**

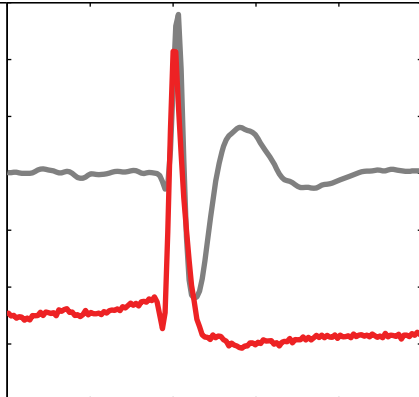

HP/PV

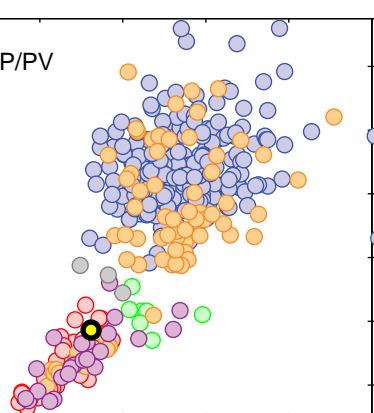

FR/PV

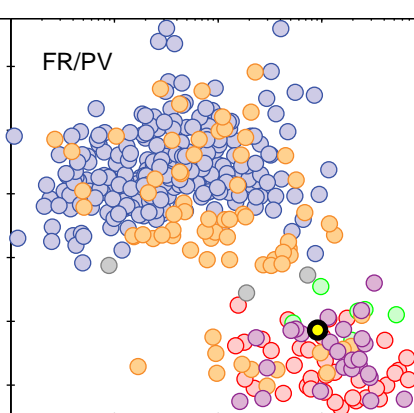

ISI Histogram [469]

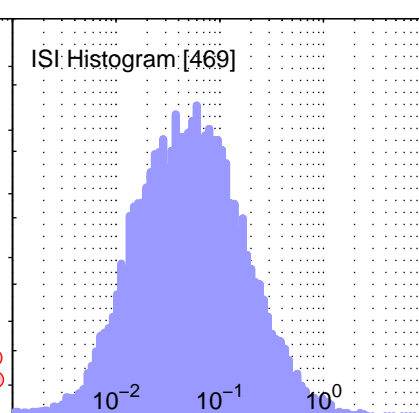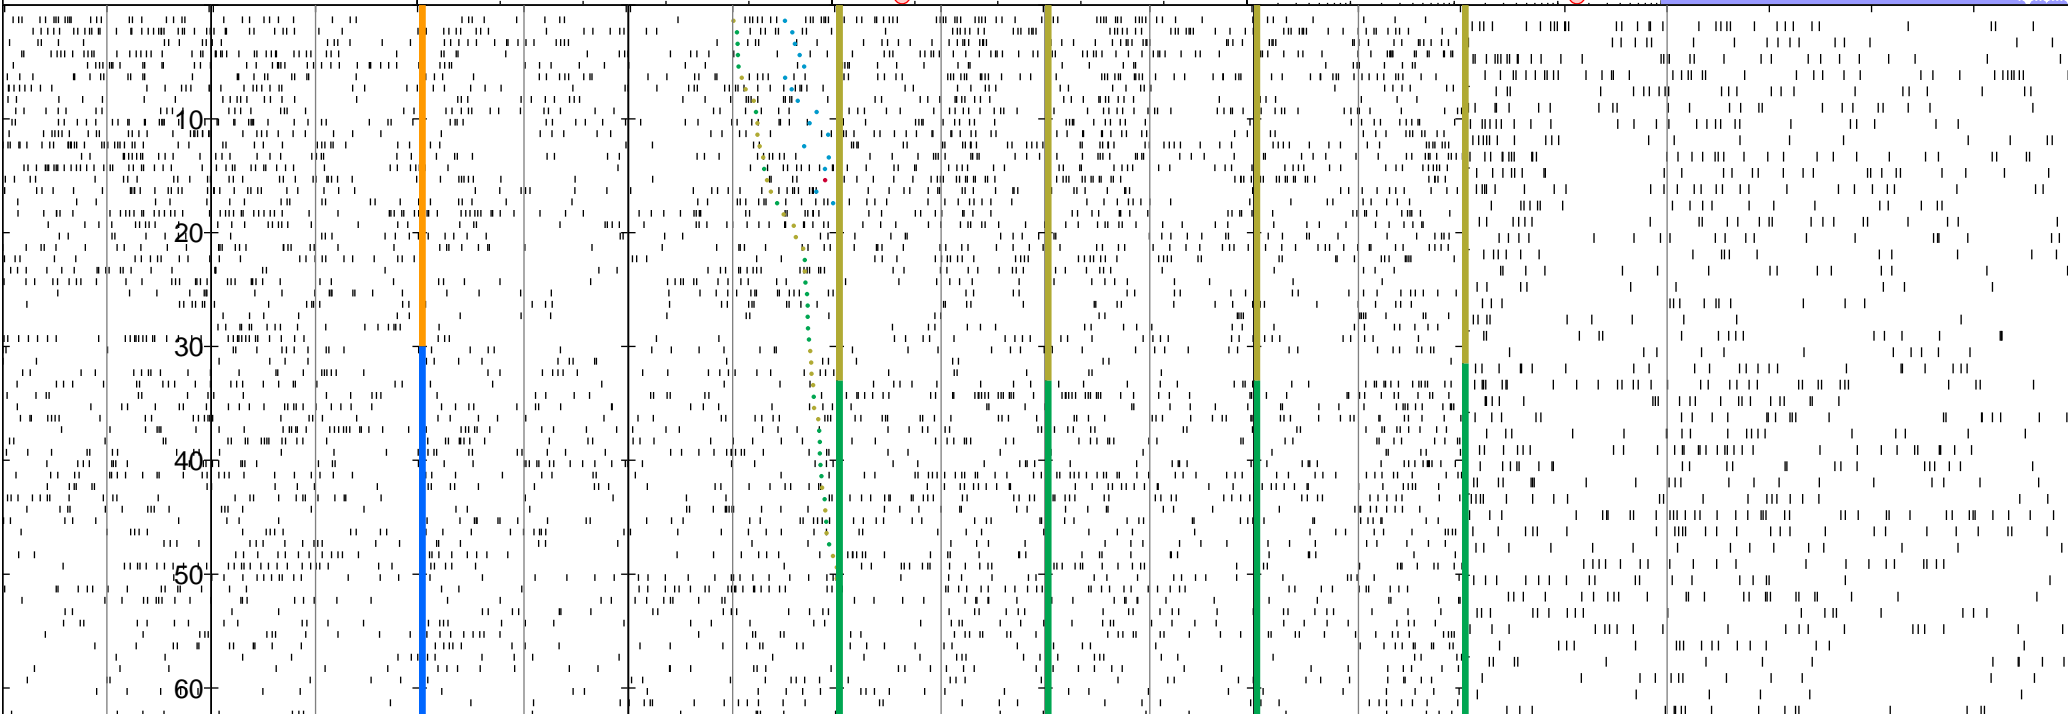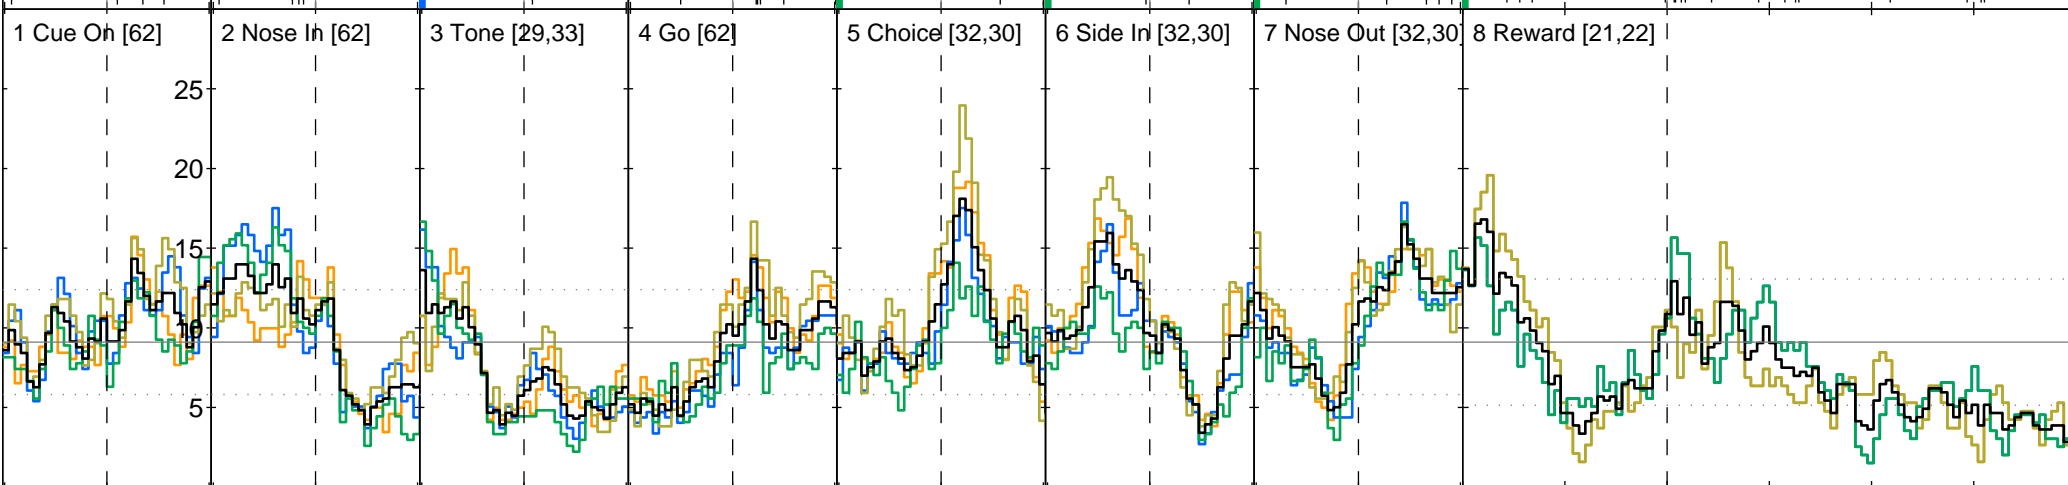

1 Cue On [62]

2 Nose In [62]

3 Tone [29,33]

4 Go [62]

5 Choice [32,30]

6 Side In [32,30]

7 Nose Out [32,30]

8 Reward [21,22]



**Cell: C0420070301T05a**

AP: 2.5 ML: 1.3 DV: 6.3  
w: 1 n: 9694  $P_{ISI>2}$ : 0.092  
1/2pw: 152 $\mu$ s p $\rightarrow$ v: 344 $\mu$ s  
 $\beta_T$ : 2.4  $\beta_D$ : 3.9  
 $\beta_P$ : 2.9 SI: -0.43  
Session FR: 2.66 Hz  
Pk Ev: 5 - Choice (Tone1)  
Pk FR: 7.36Hz (0.12s) **FSI**

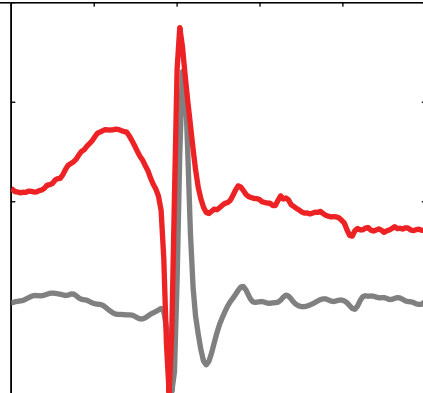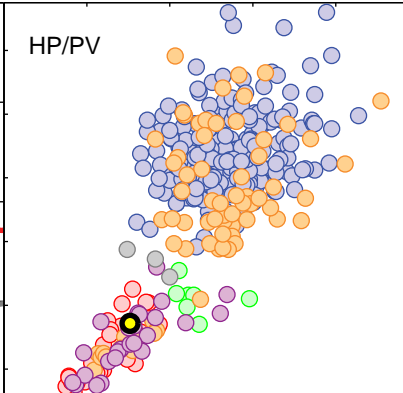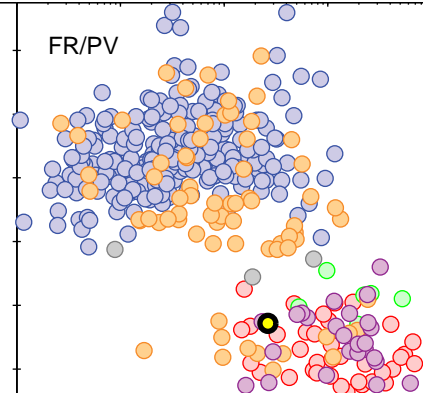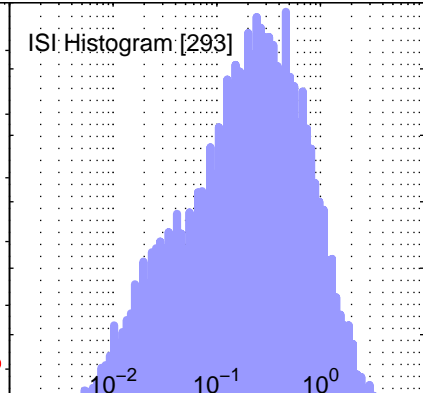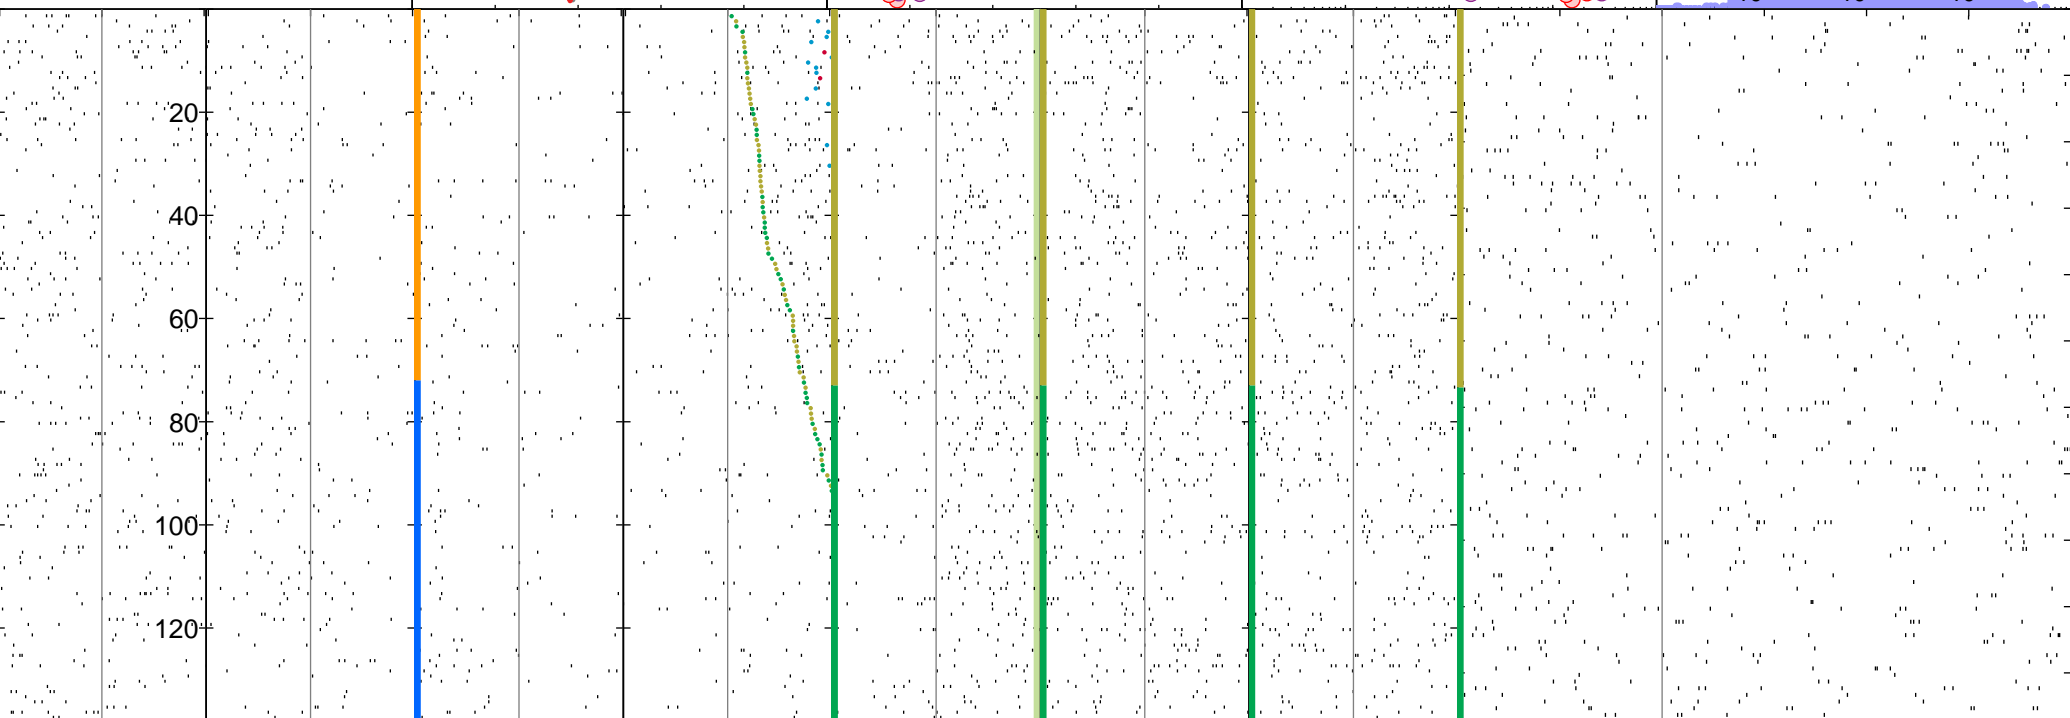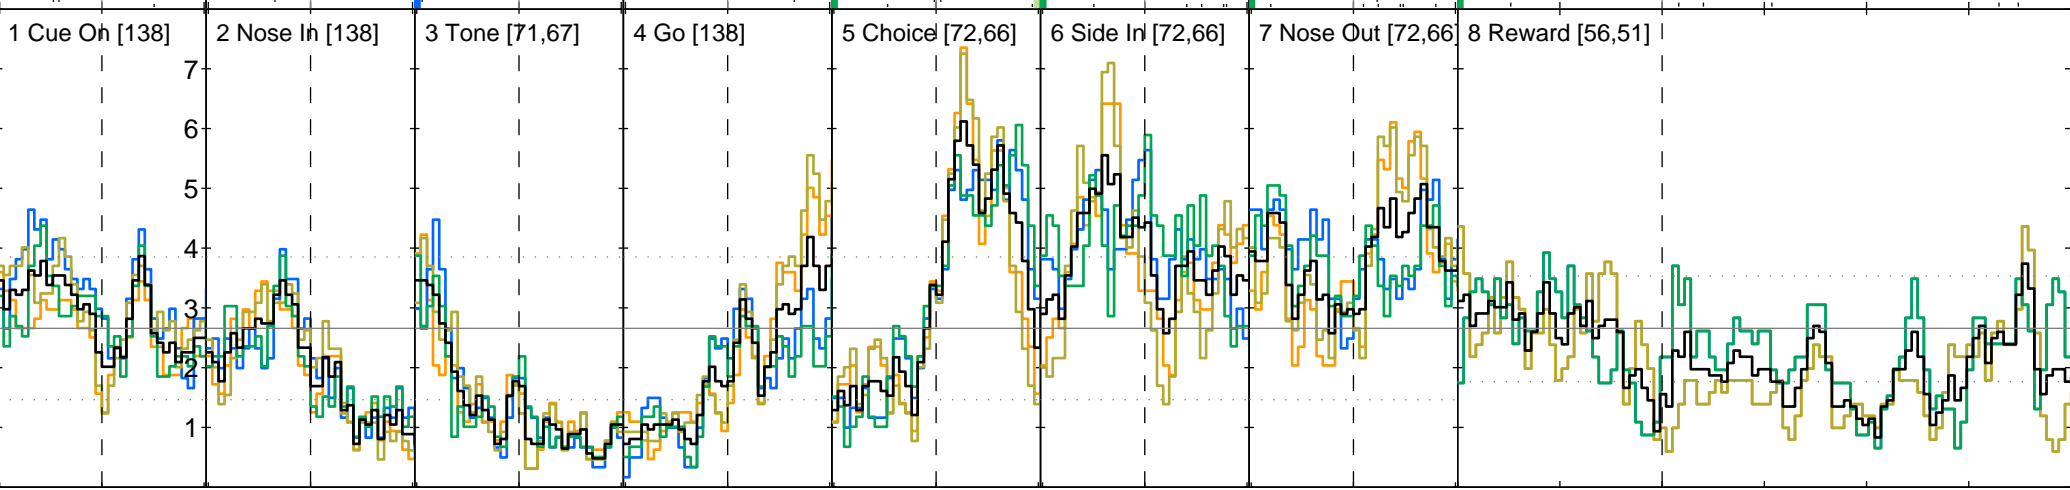

Cell: C0520070416T07a

AP: 1.3 ML: 3.4 DV: 4.5

w: 3 n: 159960  $P_{ISI>2}$ : 0

1/2pw: 88 $\mu$ s p $\rightarrow$ v: 157 $\mu$ s

$\beta_T$ : -2.6  $\beta_D$ : 9.8

$\beta_P$ : -3.8 SI: 0.45

Session FR: 35.9 Hz

Pk Ev: 5 - Choice (Ipsi)

Pk FR: 76Hz (0.12s) **FSI**

Waveform

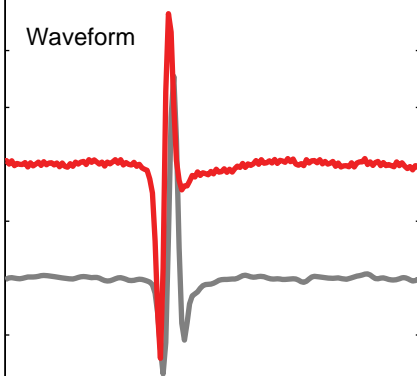

HP/PV

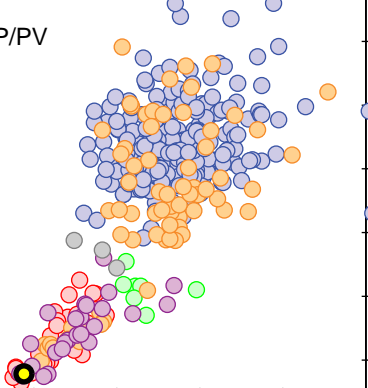

FR/PV

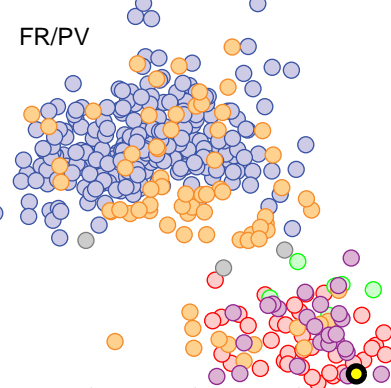

ISI Histogram [9607]

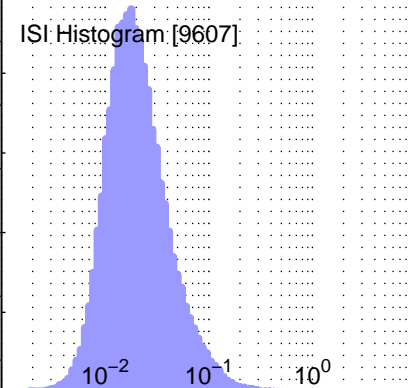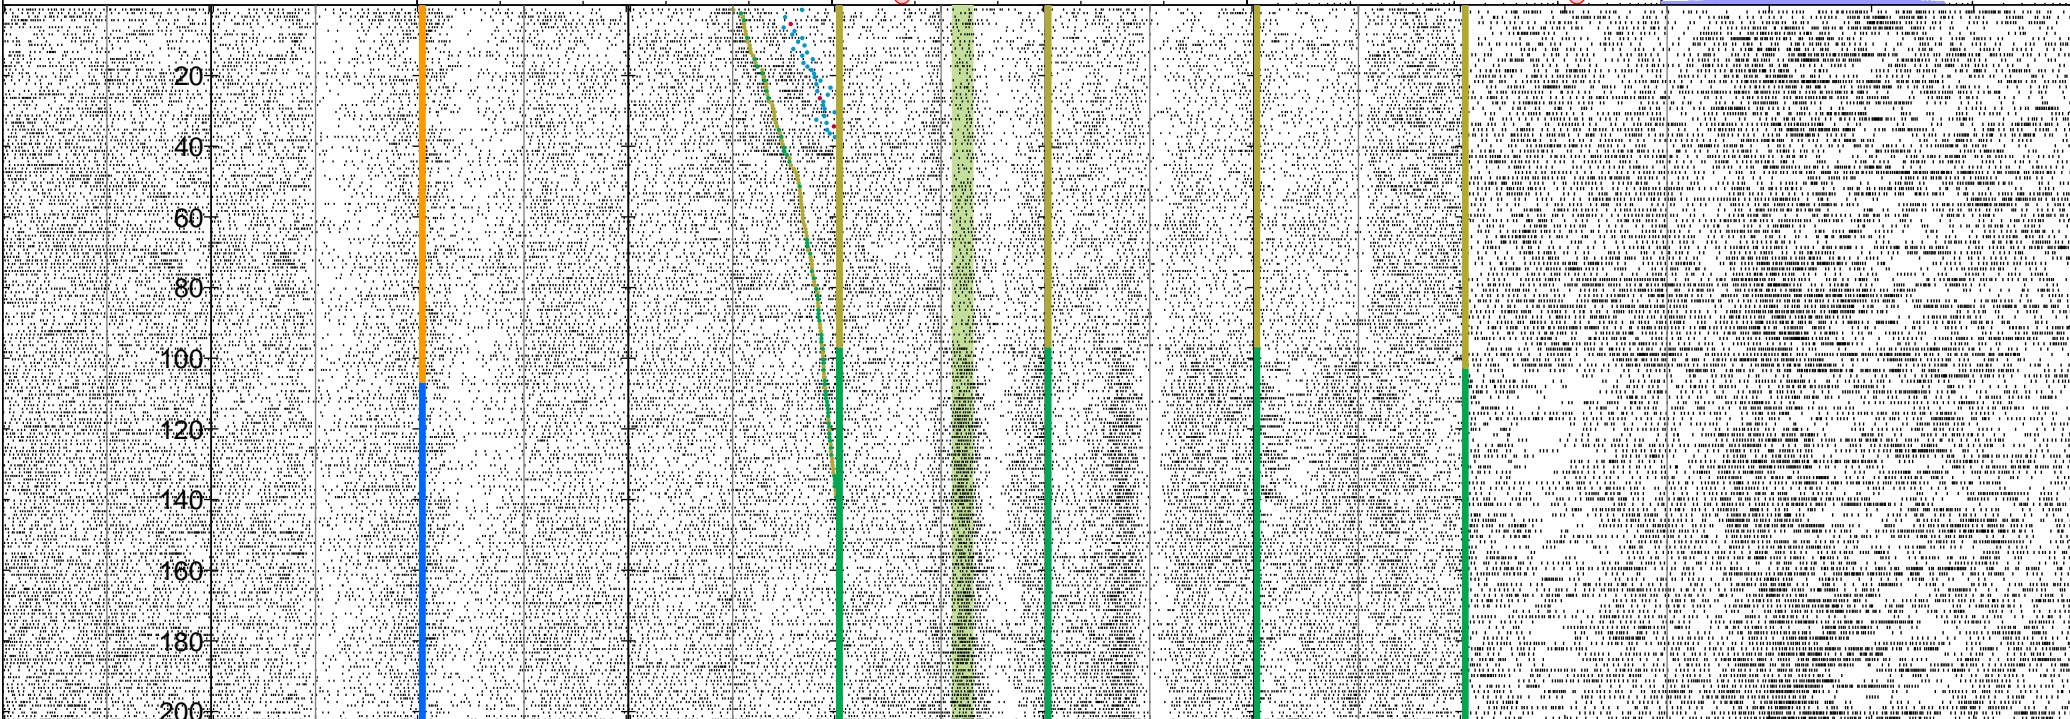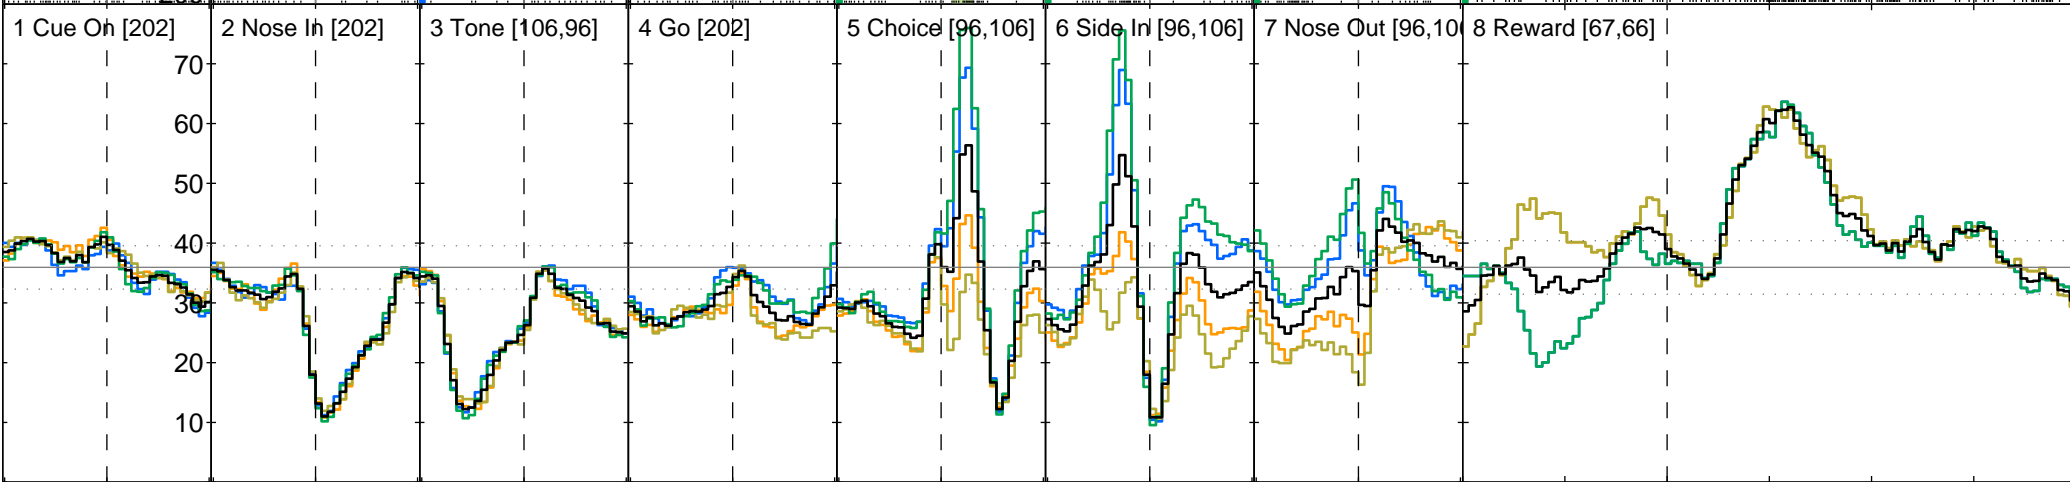

Cell: C0320070619T11d

AP: -0.96 ML: 3.7 DV: 5.4

w: 4 n: 57400  $P_{ISI>2}$ : 0

1/2pw: 75 $\mu$ s p->v: 146 $\mu$ s

$\beta_T$ : -3.9  $\beta_D$ : -2.8

$\beta_P$ : 2.7 SI: -0.23

Session FR: 13.5 Hz

Pk Ev: 5 - Choice (Ipsi)

Pk FR: 24.8Hz (0.15s) **FSI**

Waveform

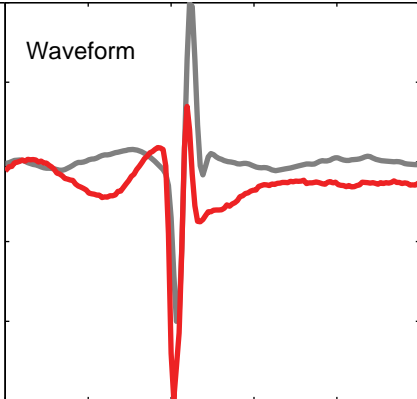

HP/PV

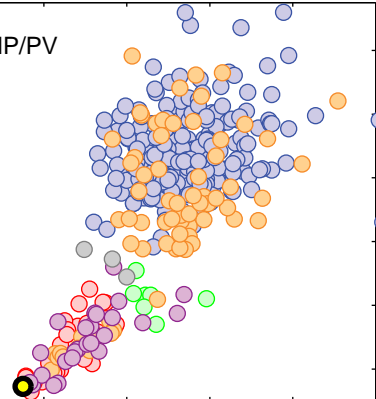

FR/PV

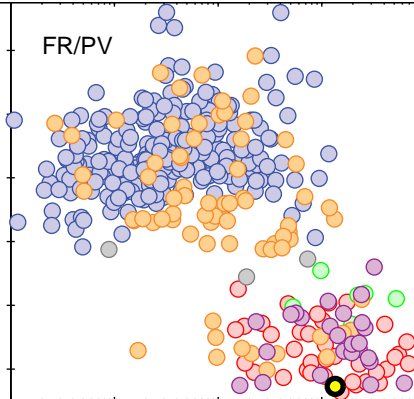

ISI Histogram [1942]

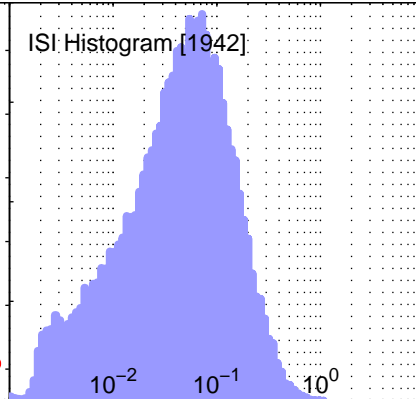

10  
20  
30  
40  
50  
60  
70  
80  
90

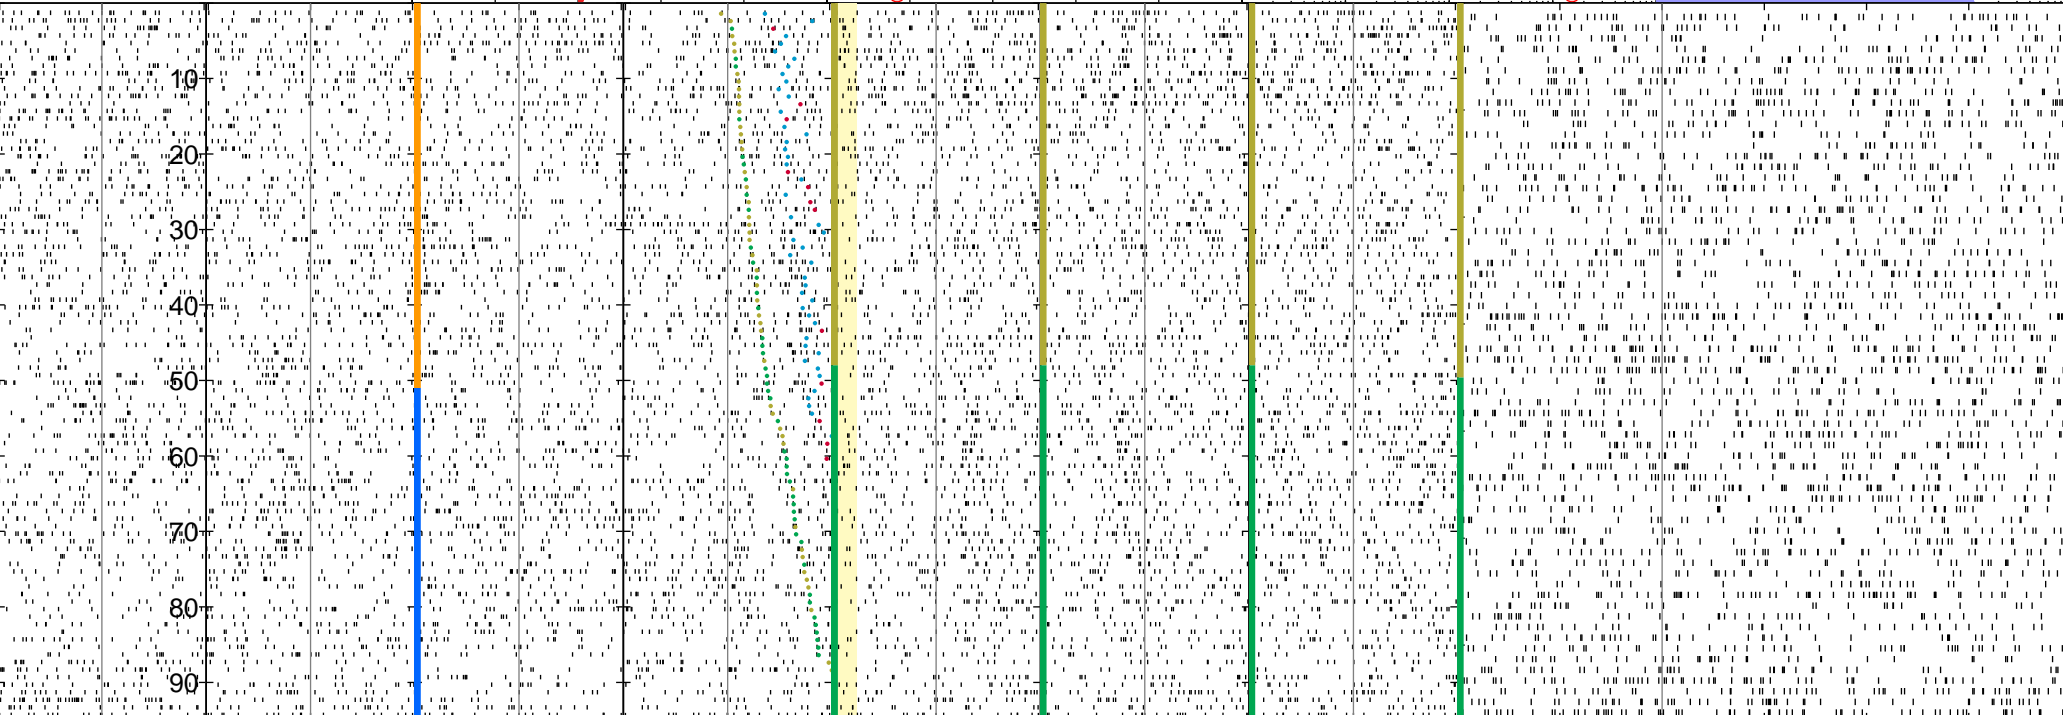

1 Cue Oh [94] 2 Nose In [94] 3 Tone [50,44] 4 Go [94] 5 Choice [47,47] 6 Side In [47,47] 7 Nose Out [47,47] 8 Reward [34,32]

20  
15  
10

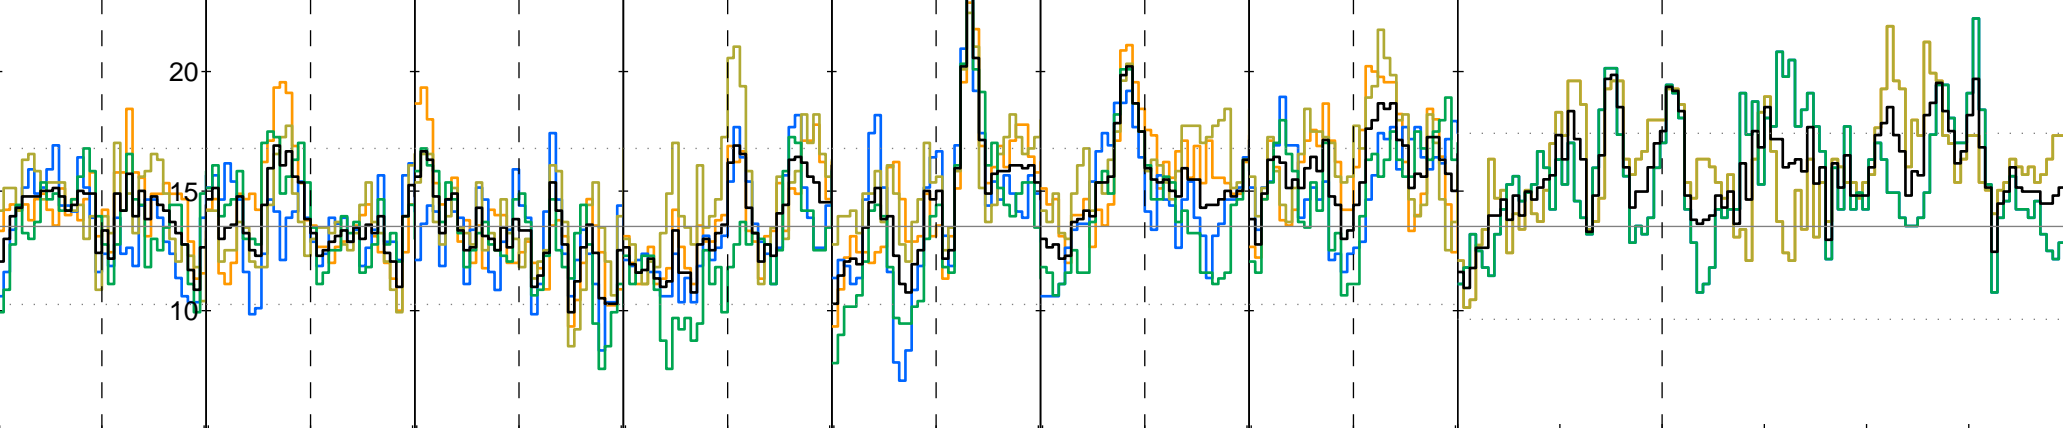

Cell: C0520070417T07g

AP: 1.3 ML: 3.4 DV: 4.5

w: 3 n: 4814  $P_{ISI>2}$ : 0.38

1/2pw: 128 $\mu$ s p $\rightarrow$ v: 323 $\mu$ s

$\beta_T$ : -3  $\beta_D$ : 2.5

$\beta_P$ : 2.1 SI: -0.27

Session FR: 1.48 Hz

Pk Ev: 5 - Choice (Contra)

Pk FR: 6.46Hz (0.21s) **FSI**

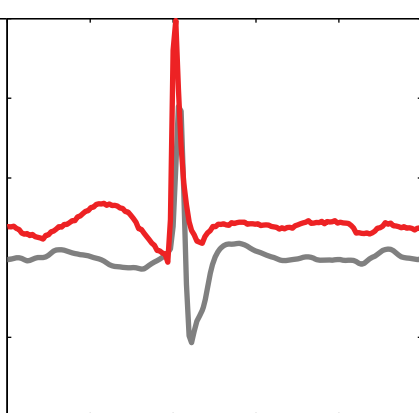

HP/PV

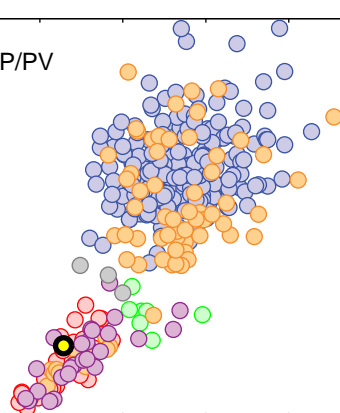

FR/PV

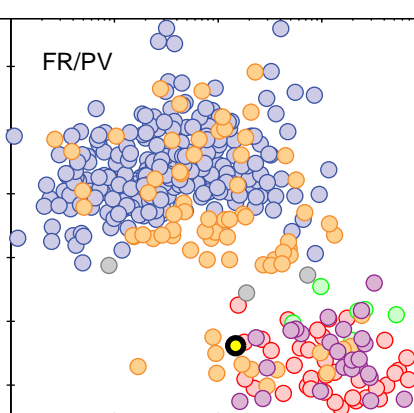

ISI Histogram [135]

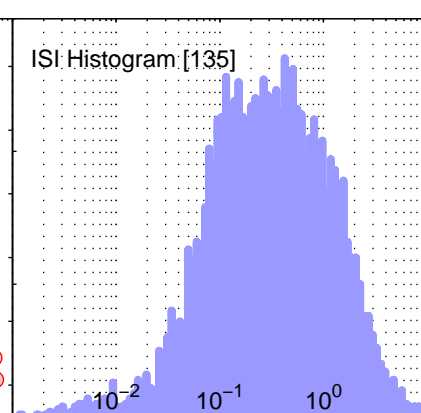

10  
20  
30  
40  
50  
60  
70  
80  
90  
100

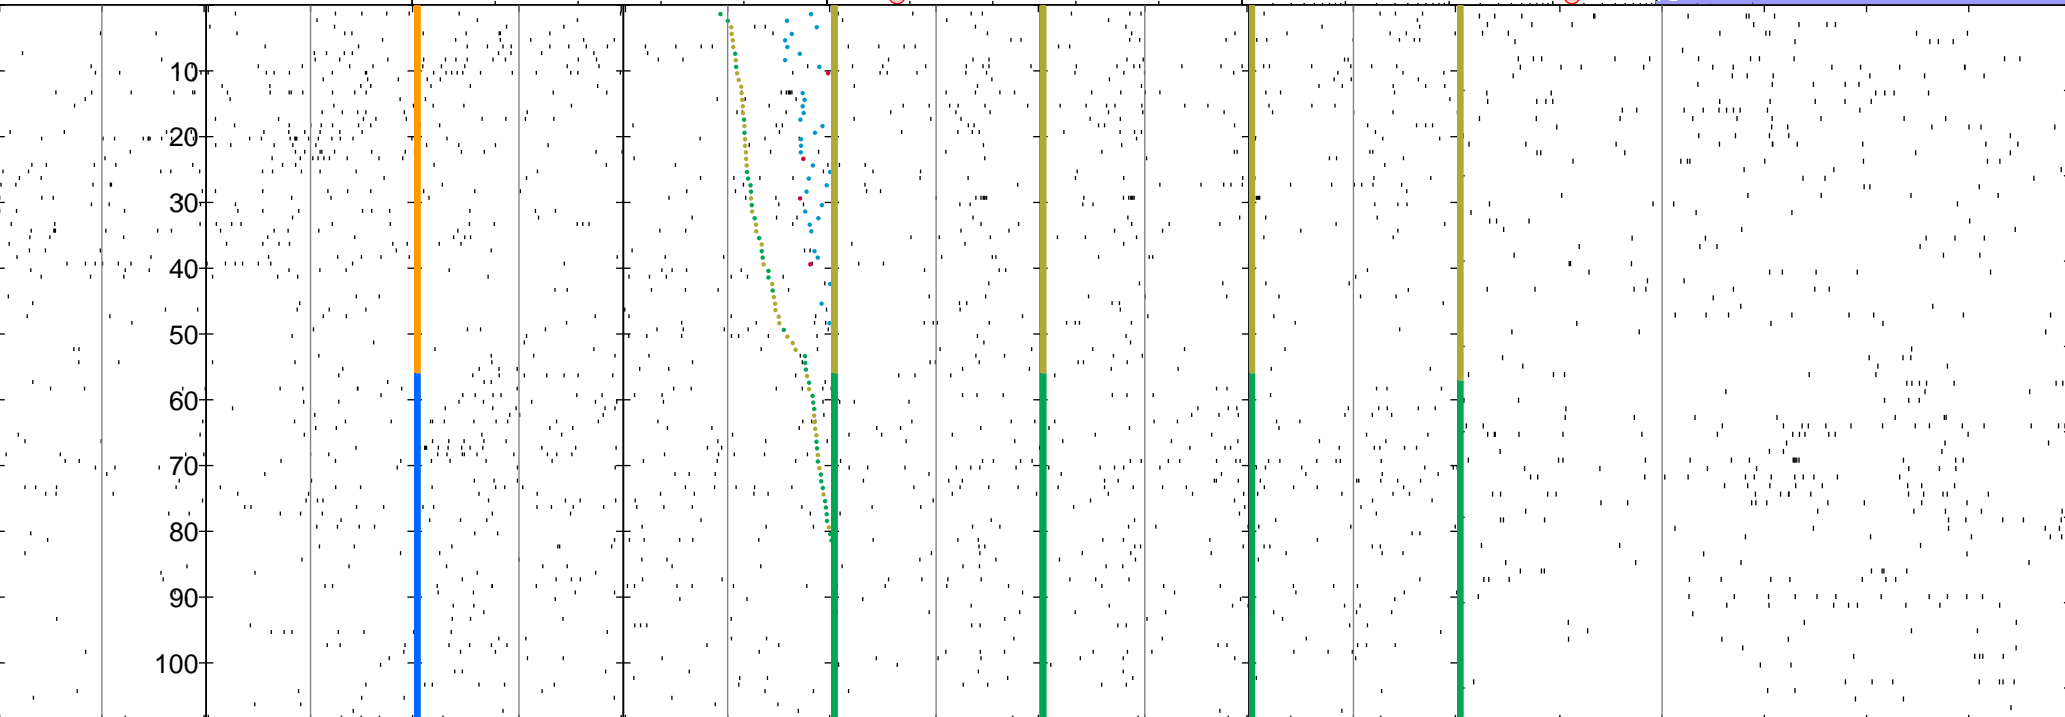

1 Cue On [108]

2 Nose In [108]

3 Tone [55,53]

4 Go [108]

5 Choice [55,53]

6 Side In [55,53]

7 Nose Out [55,53]

8 Reward [43,40]

7  
6  
5  
4  
3  
2  
1

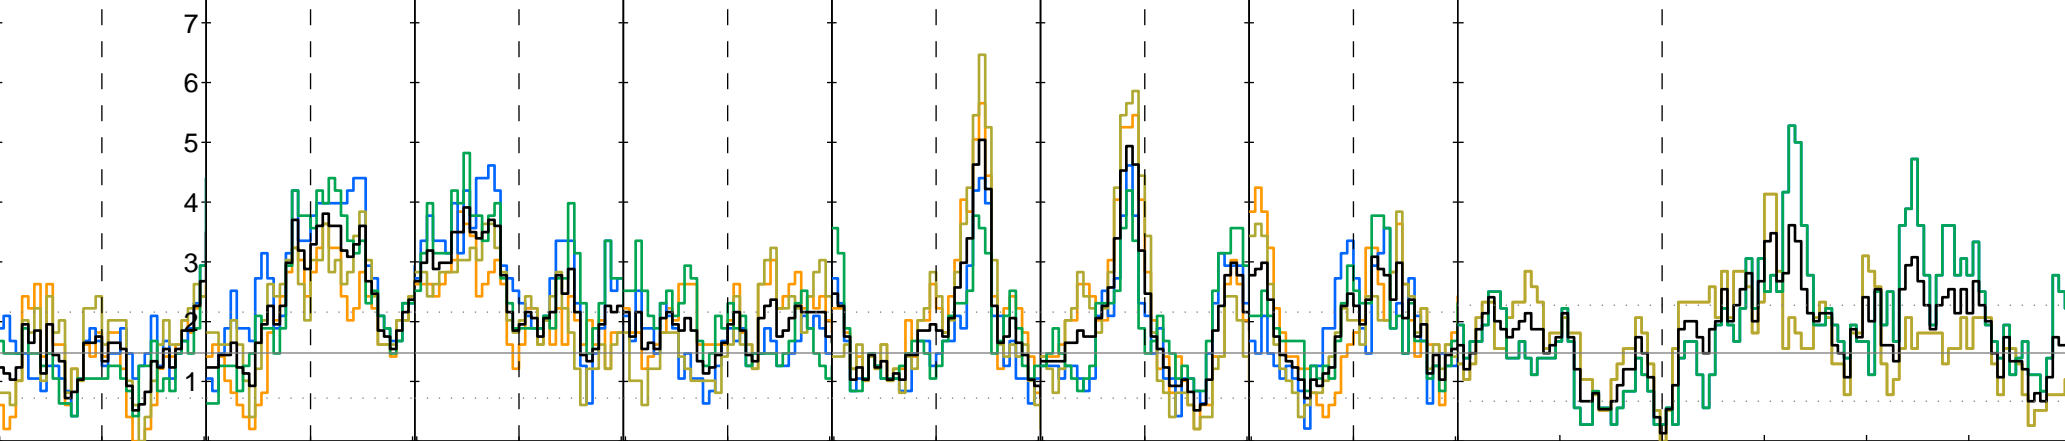



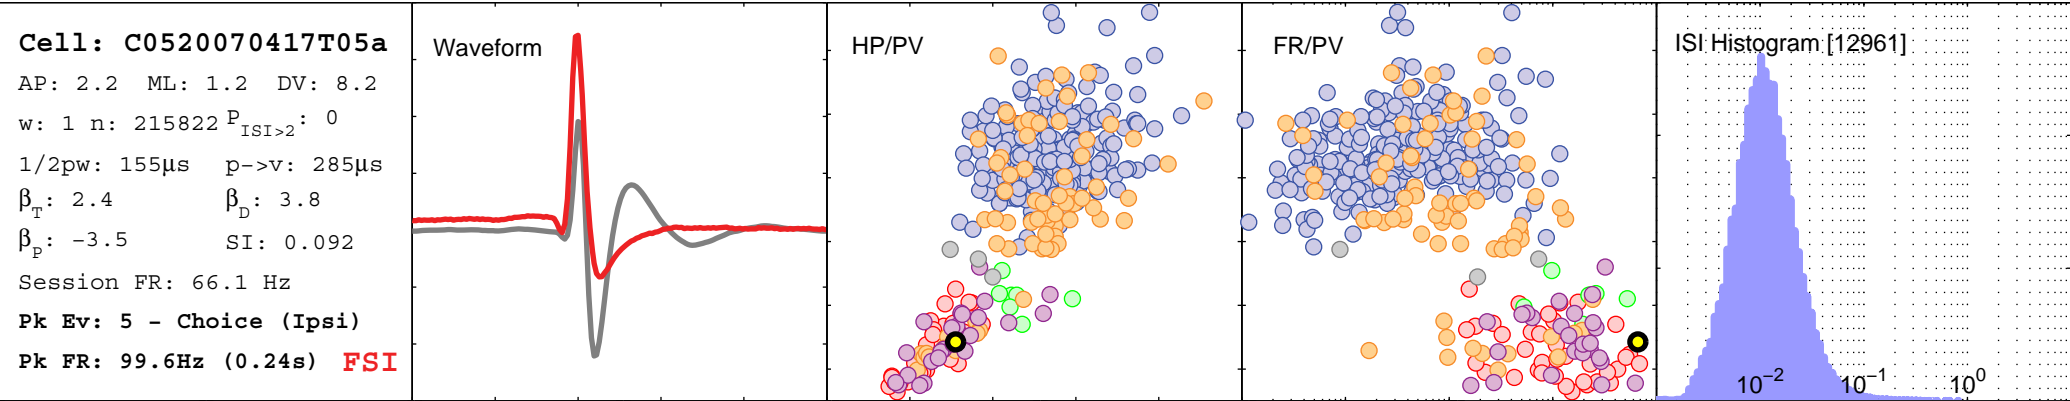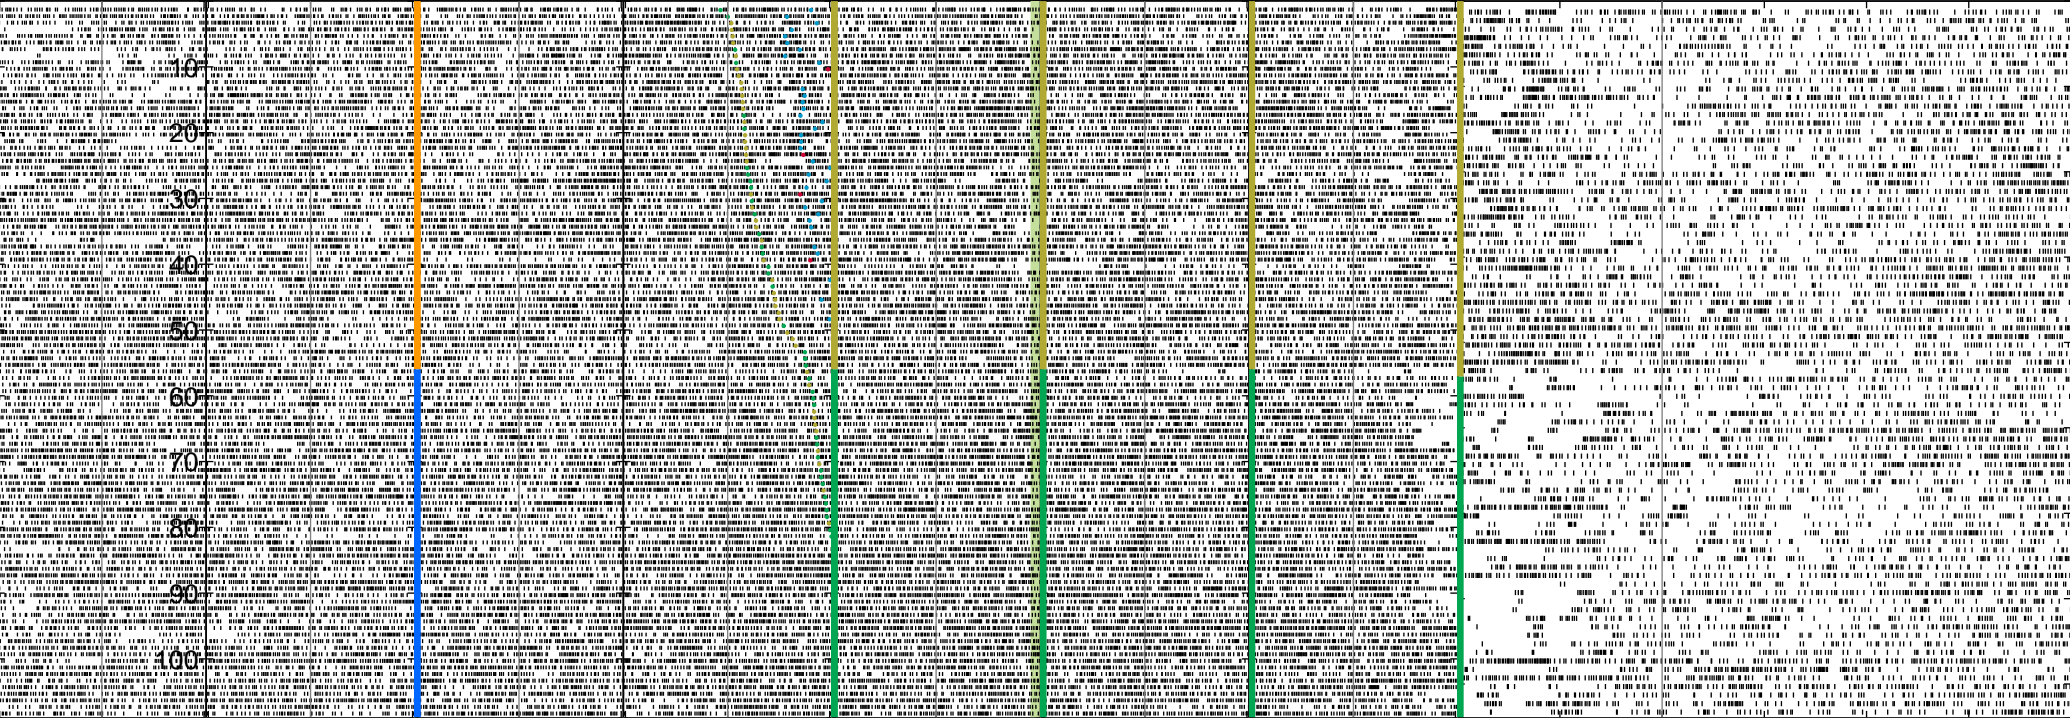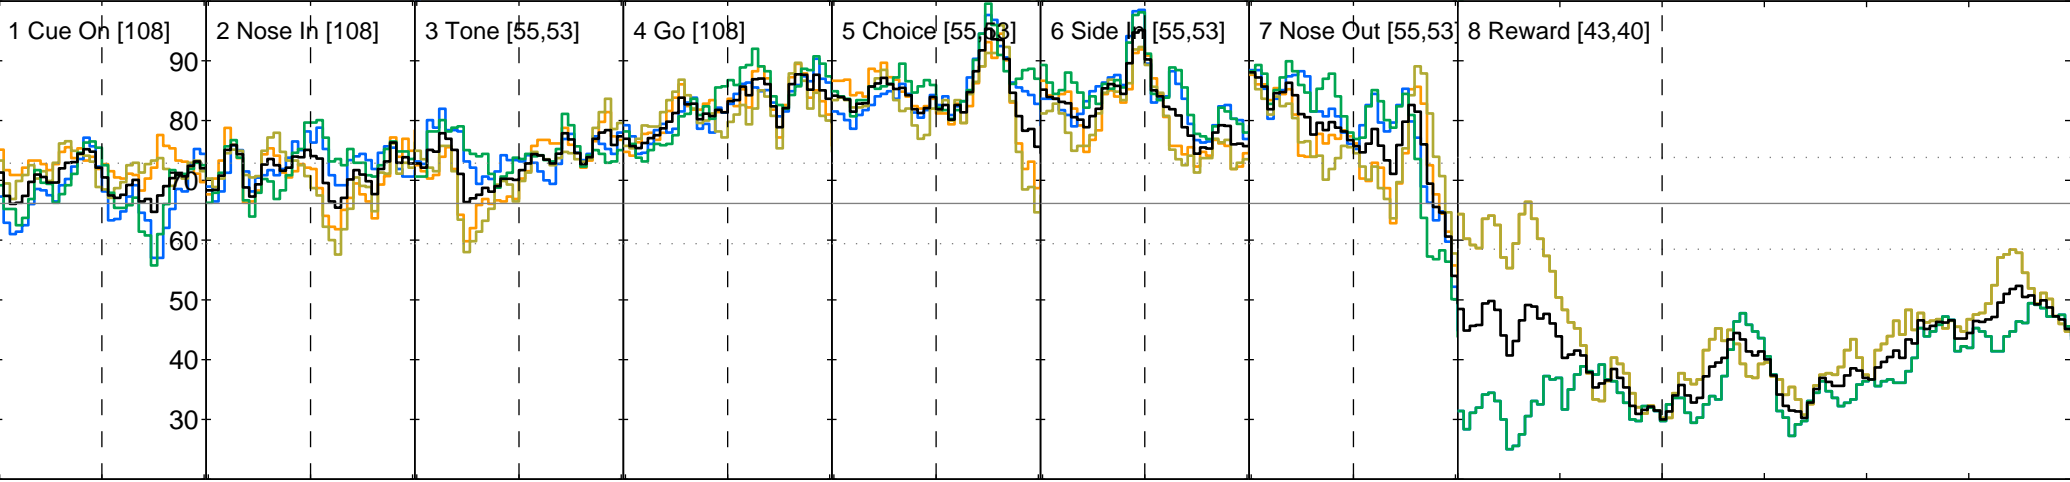

Cell: C0320070624T06a

AP: 1.7 ML: 1.3 DV: 6.8

w: 4 n: 190479  $P_{ISI>2}$ : 0

1/2pw: 130 $\mu$ s p $\rightarrow$ v: 237 $\mu$ s

$\beta_T$ : 2.3  $\beta_D$ : -2.4

$\beta_P$ : -2.9 SI: 0.074

Session FR: 50.9 Hz

Pk Ev: 5 - Choice (Ipsi)

Pk FR: 99.1Hz (0.39s) **FSI**

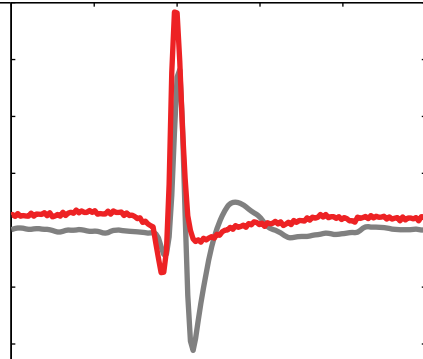

HP/PV

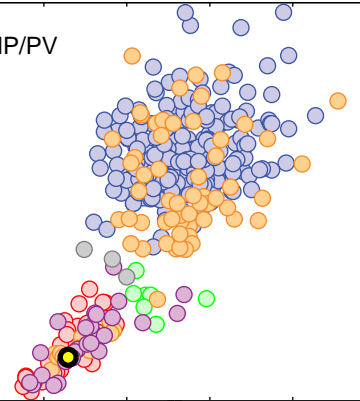

FR/PV

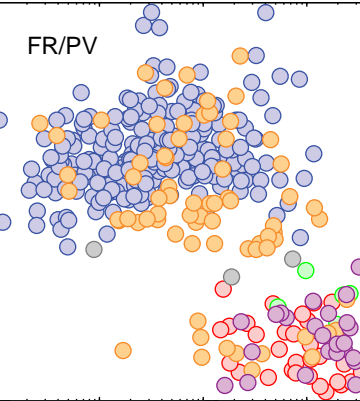

ISI Histogram [8395]

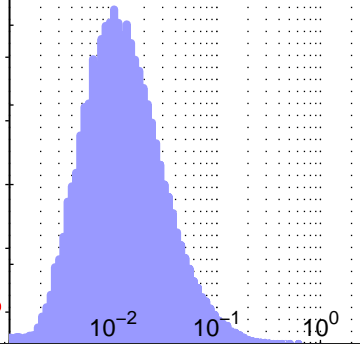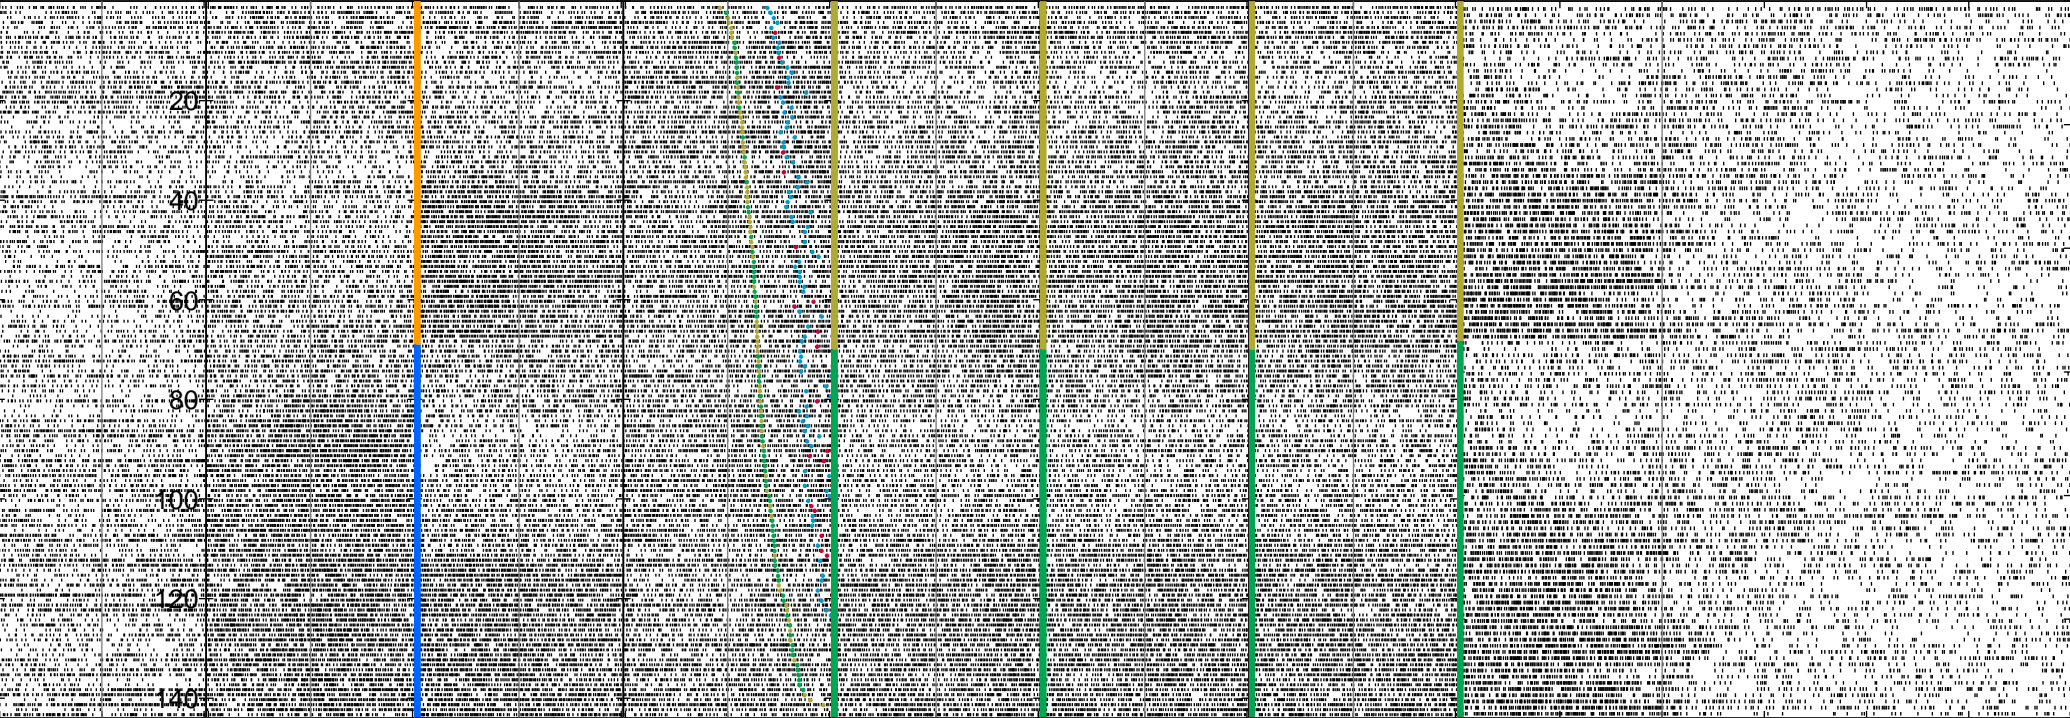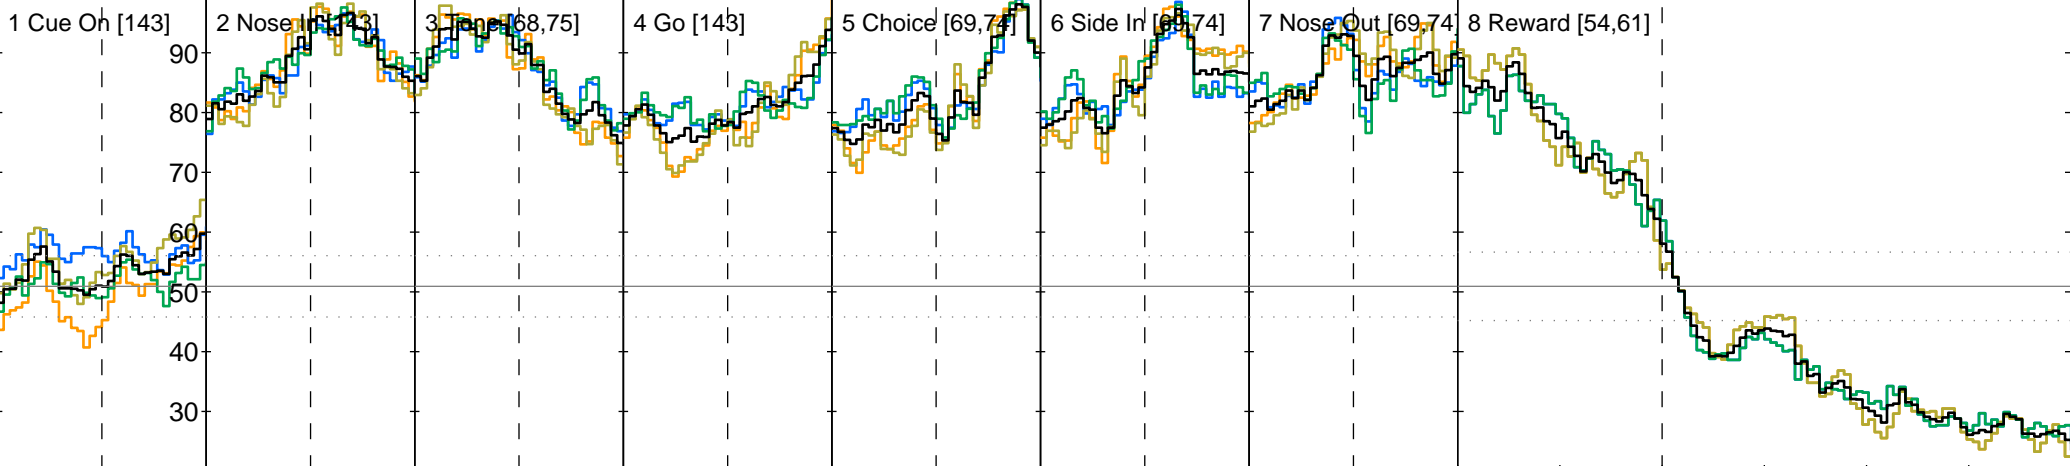

**Cell: C0420070314T05b**

AP: 2.5 ML: 1.3 DV: 6.7

w: 4 n: 86309  $P_{ISI>2}$ : 0.0121/2pw: 174 $\mu$ s p $\rightarrow$ v: 408 $\mu$ s $\beta_T$ : -2.4  $\beta_D$ : -4.1 $\beta_P$ : -3.2 SI: 0.29

Session FR: 11.6 Hz

Pk Ev: 5 - Choice (Ipsi)

Pk FR: 23.7Hz (1.26s) **FSI**

Waveform

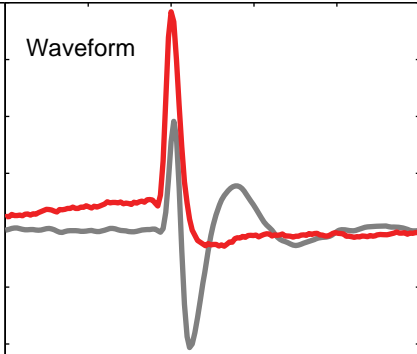

HP/PV

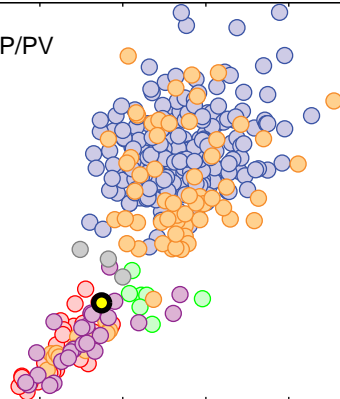

FR/PV

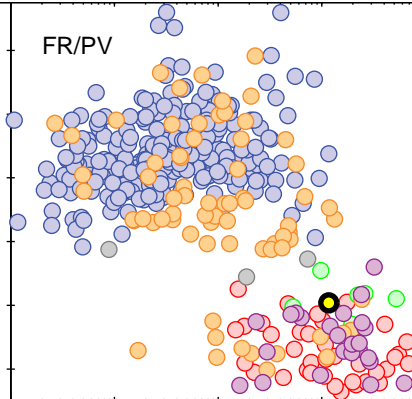

ISI Histogram [2634]

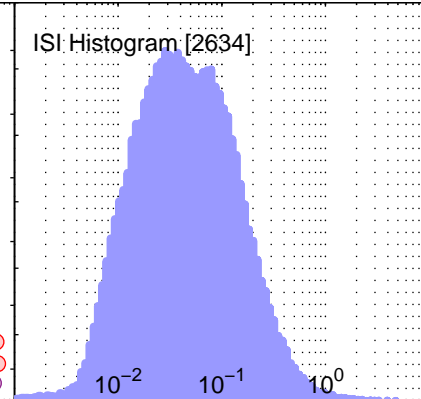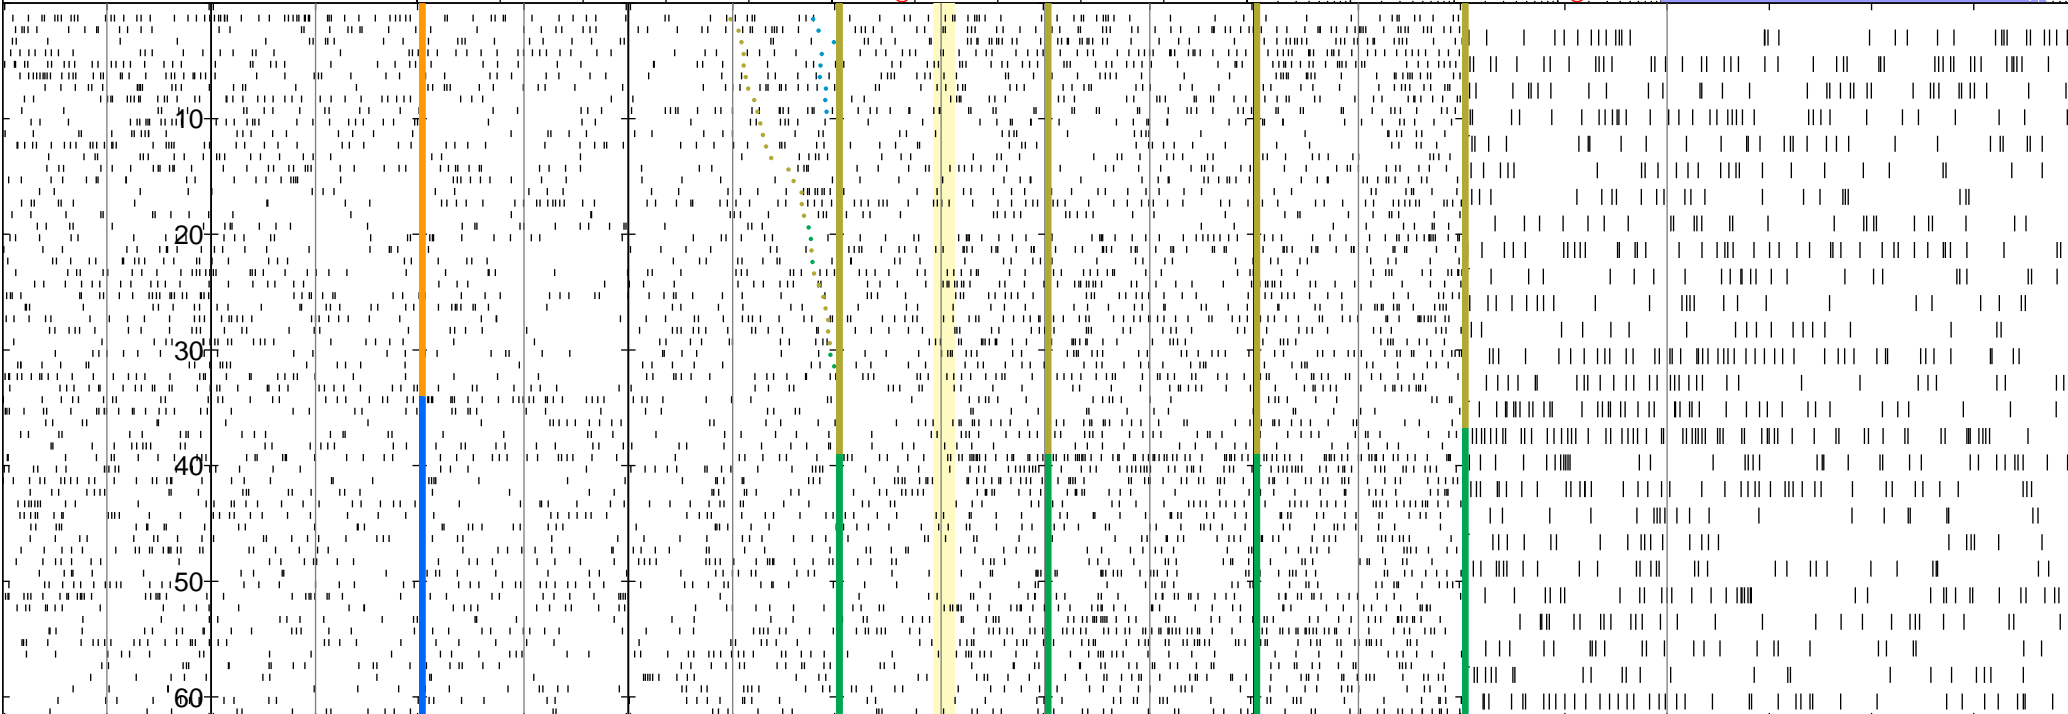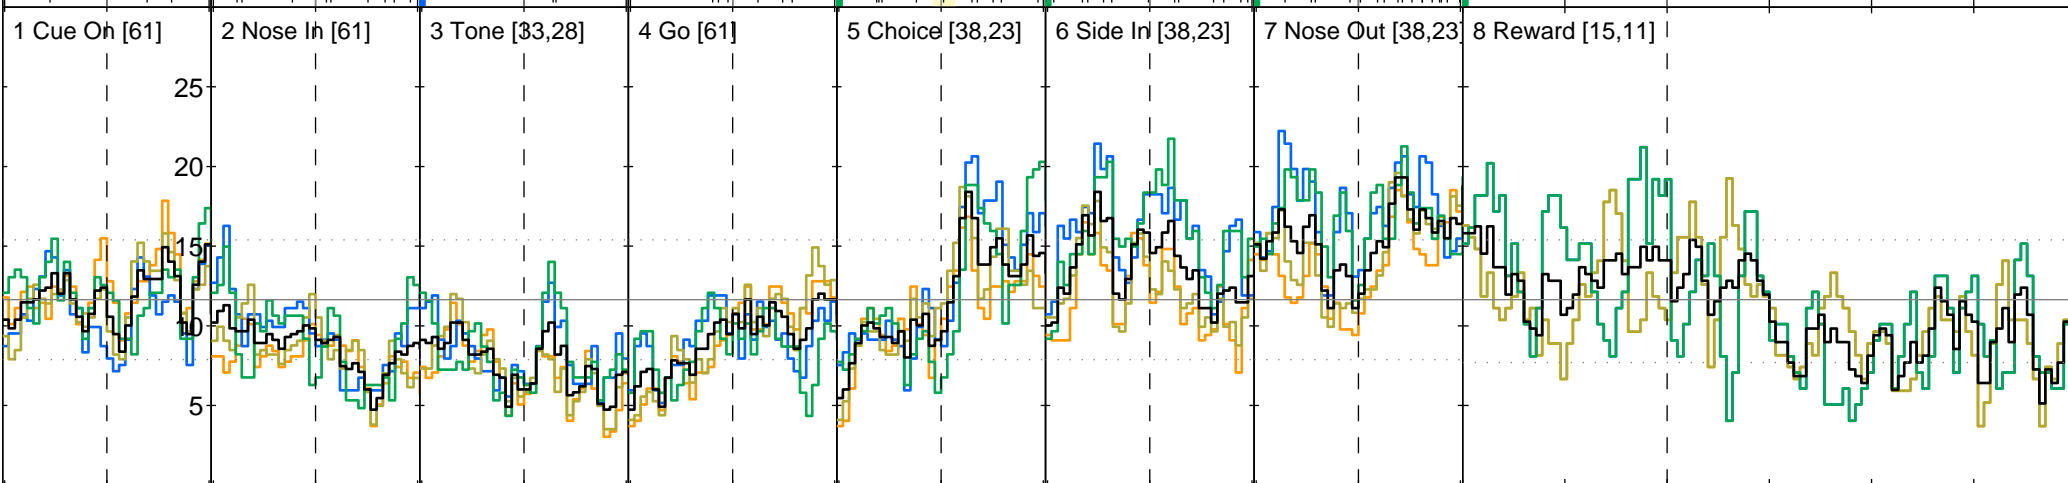

Cell: C0320070624T09c

AP: 1.6 ML: 3.7 DV: 5.4

w: 2 n: 74683  $P_{ISI>2}$ : 0

1/2pw: 82 $\mu$ s p $\rightarrow$ v: 160 $\mu$ s

$\beta_T$ : 4.3  $\beta_D$ : 10

$\beta_P$ : 3.3 SI: 0.61

Session FR: 20 Hz

Pk Ev: 6 - Side In (Contra)

Pk FR: 37.7Hz (-0.06s) **FSI**

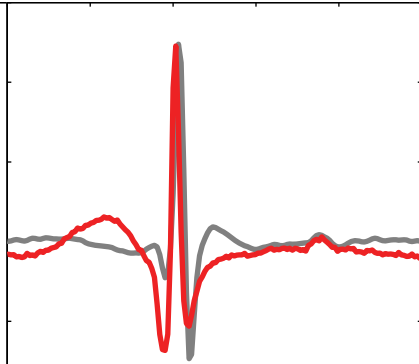

HP/PV

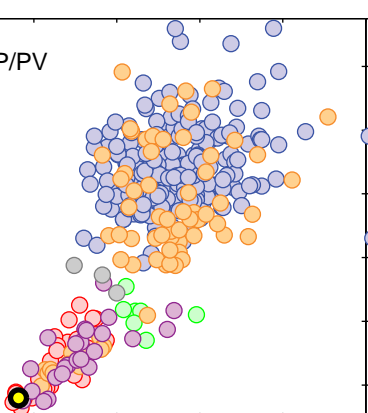

FR/PV

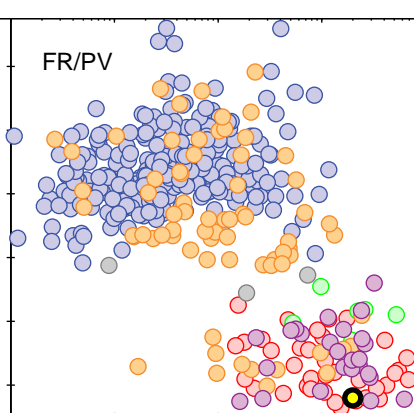

ISI Histogram [2450]

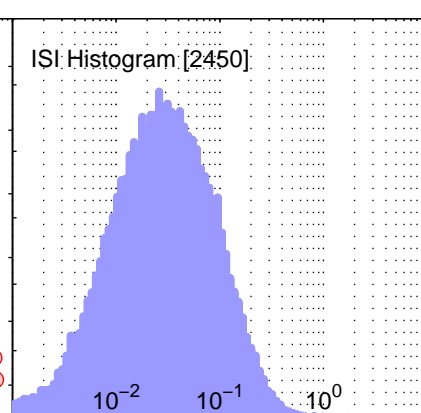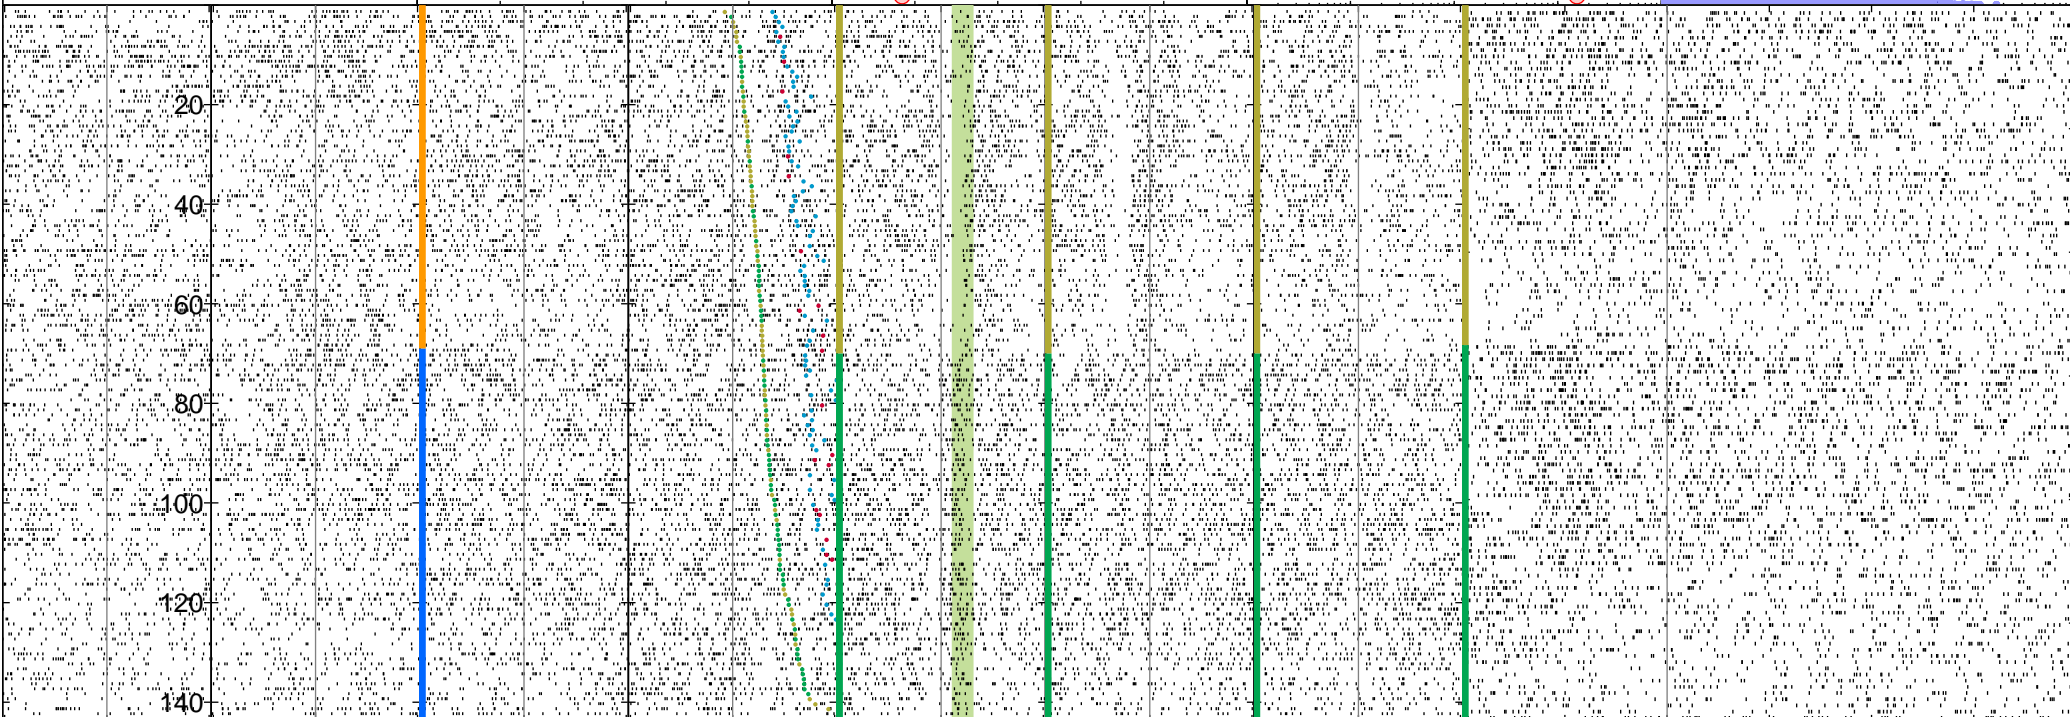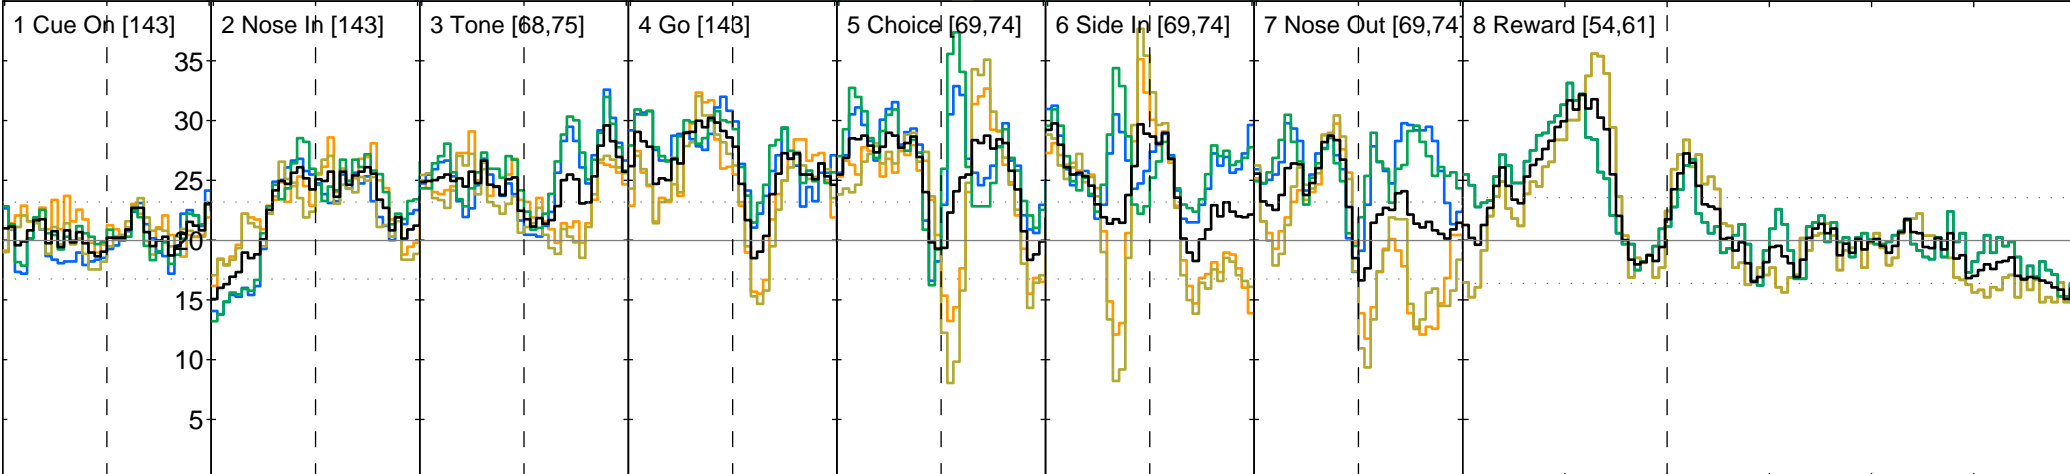



Cell: C0320070627T09a

AP: 1.6 ML: 3.7 DV: 5.8

w: 1 n: 36513  $P_{ISI>2}$ : 0.0019

1/2pw: 78 $\mu$ s p $\rightarrow$ v: 178 $\mu$ s

$\beta_T$ : 3  $\beta_D$ : -4.2

$\beta_P$ : -4 SI: -0.27

Session FR: 10.6 Hz

Pk Ev: 6 - Side In (Contra)

Pk FR: 27.2Hz (0.03s) **FSI**

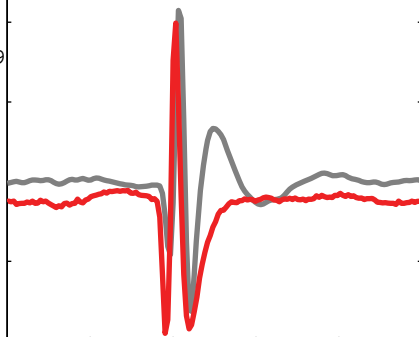

HP/PV

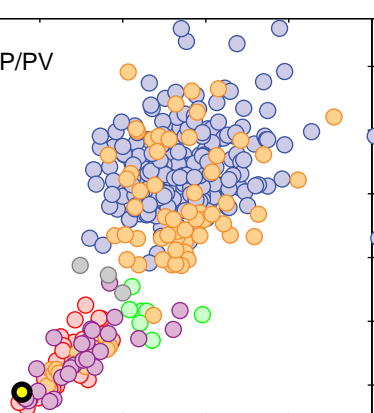

FR/PV

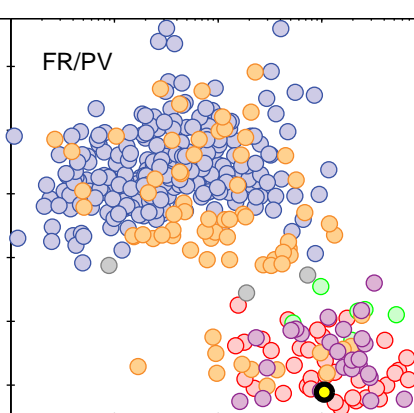

ISI Histogram [1199]

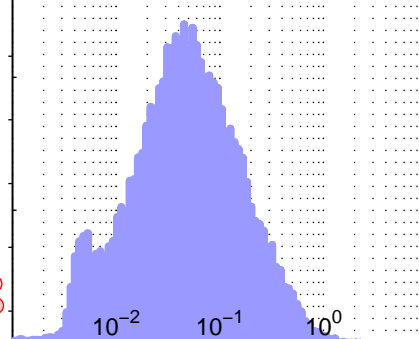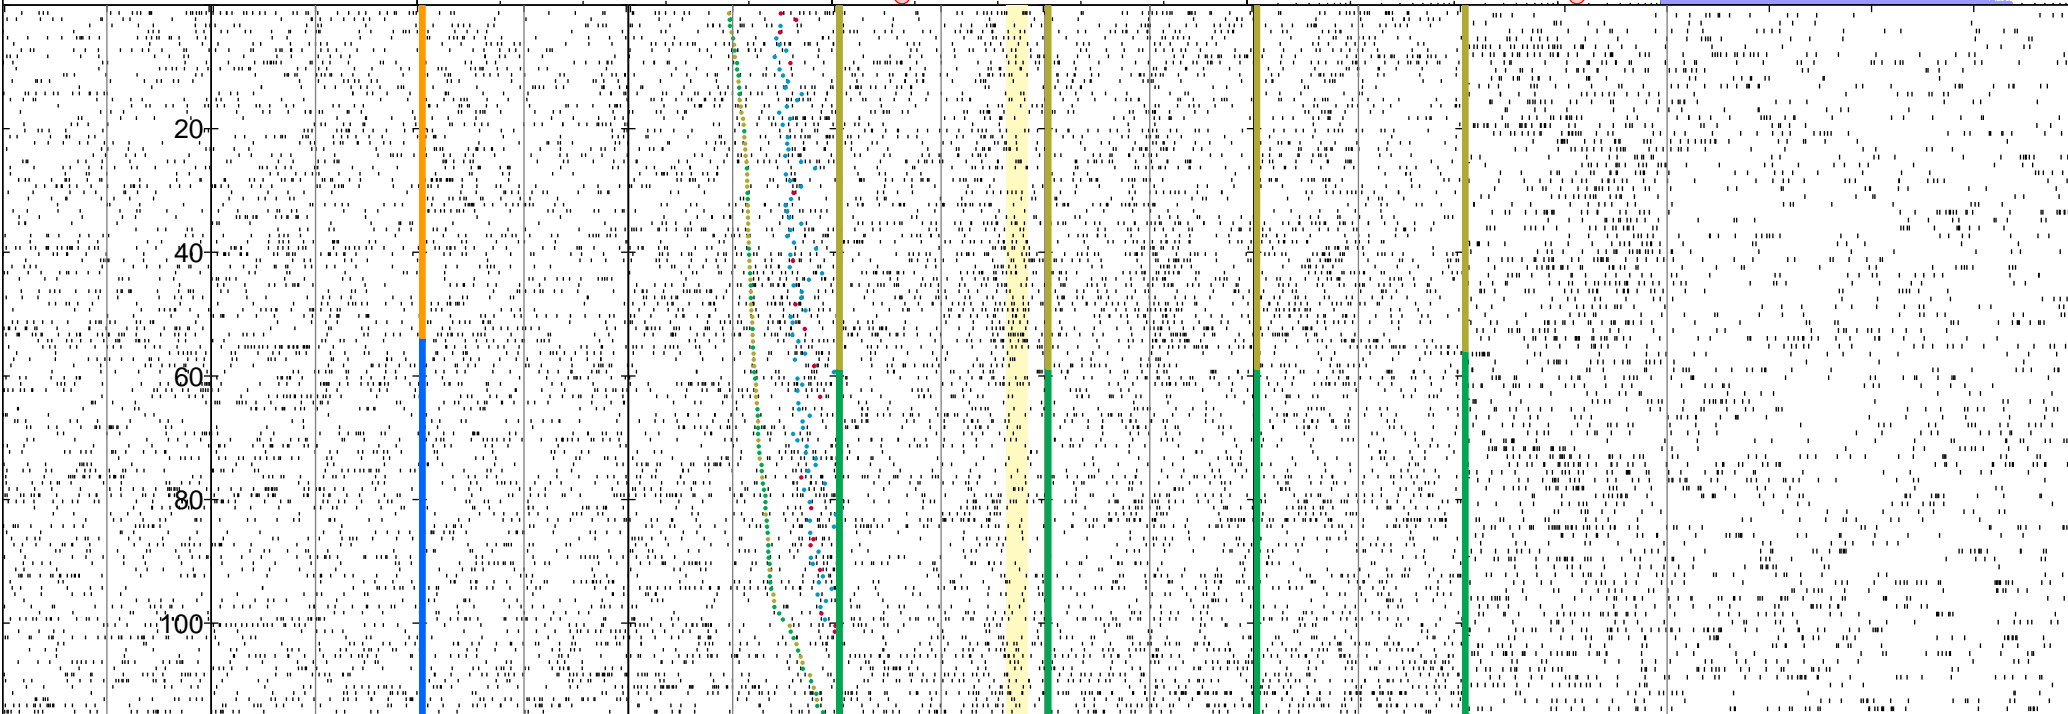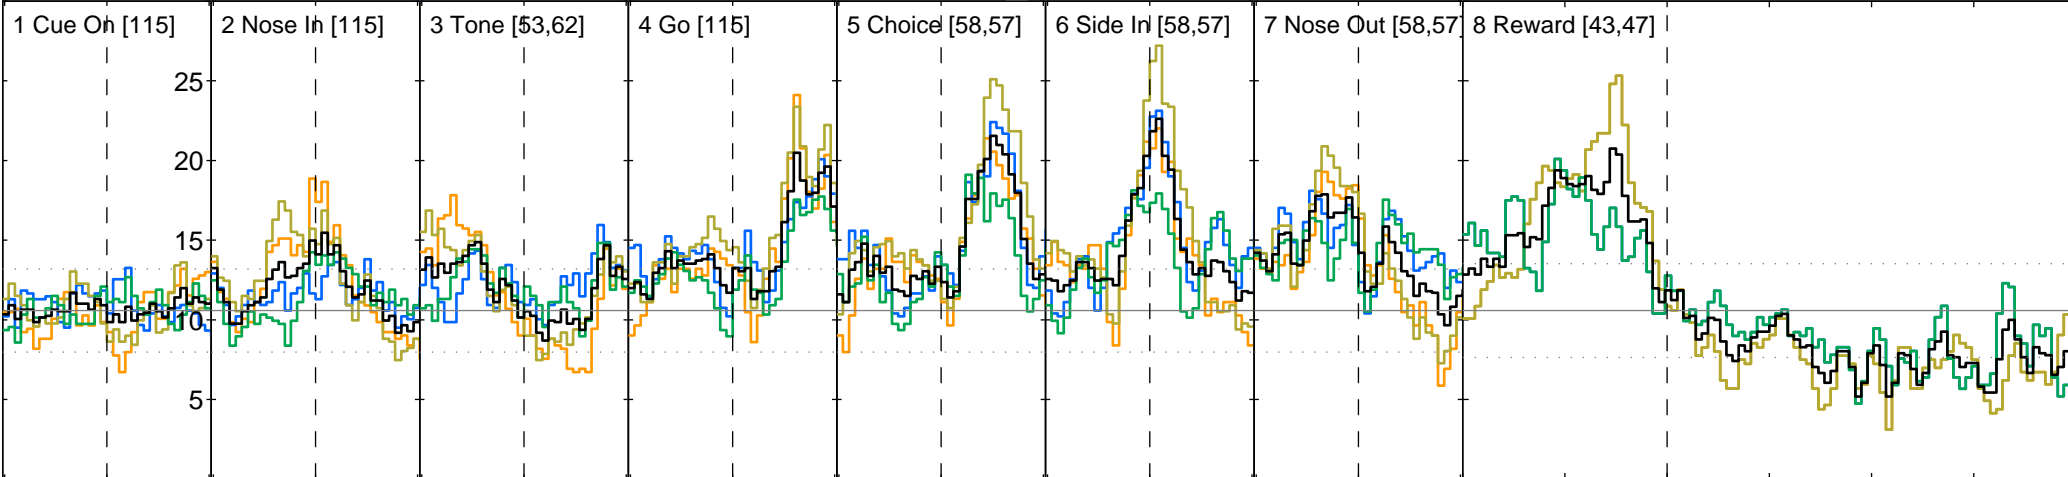

**Cell: C0520070402T07a**

AP: 1.3 ML: 3.4 DV: 3.4

w: 3 n: 60502  $P_{ISI>2}$ : 0.00821/2pw: 133 $\mu$ s p $\rightarrow$ v: 240 $\mu$ s $\beta_T$ : 3.1  $\beta_D$ : 3.5 $\beta_P$ : 3.7 SI: 0.32

Session FR: 13.3 Hz

Pk Ev: 6 - Side In (Ipsi)

Pk FR: 28.7Hz (0.18s) **FSI**

Waveform

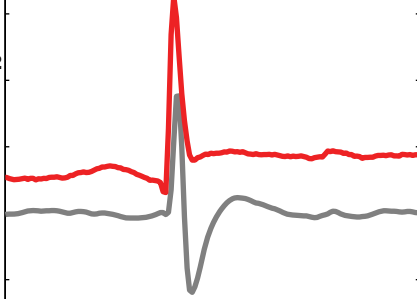

HP/PV

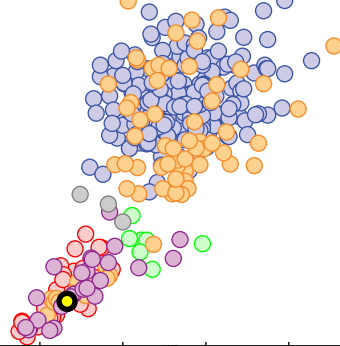

FR/PV

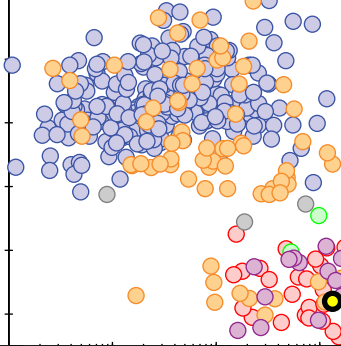

ISI Histogram [1786]

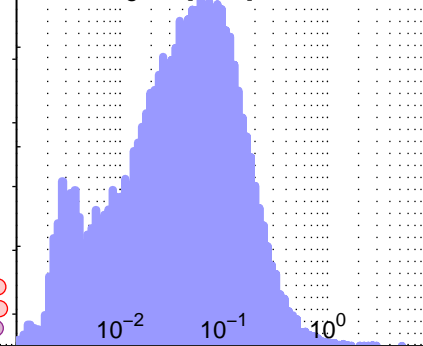

20

40

60

80

100

120

140

160

1 Cue On [177]

2 Nose In [177]

3 Tone [84,93]

4 Go [177]

5 Choice [96,81]

6 Side In [96,81]

7 Nose Out [96,81]

8 Reward [64,62]

25

20

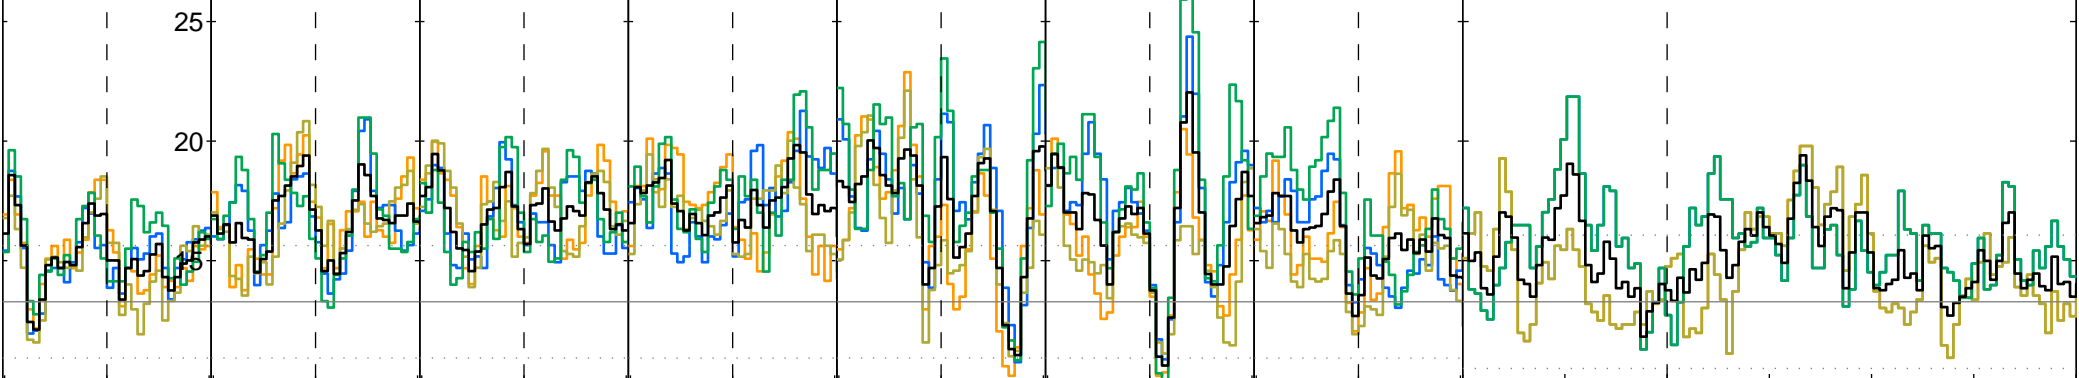

Cell: C0320070622T09a

AP: 1.6 ML: 3.7 DV: 5.2

w: 2 n: 42931  $P_{ISI>2}$ : 0

1/2pw: 120 $\mu$ s p $\rightarrow$ v: 277 $\mu$ s

$\beta_T$ : 2.3  $\beta_D$ : -5.4

$\beta_P$ : 2.9 SI: -0.48

Session FR: 10.8 Hz

Pk Ev: 7 - Nose out (Contra)

Pk FR: 26.4Hz (0.12s) **FSI**

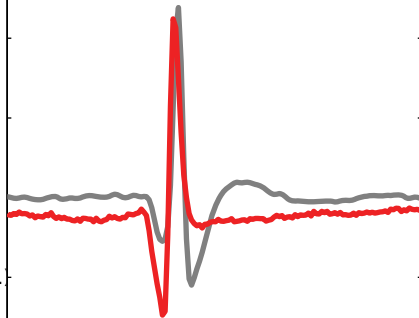

HP/PV

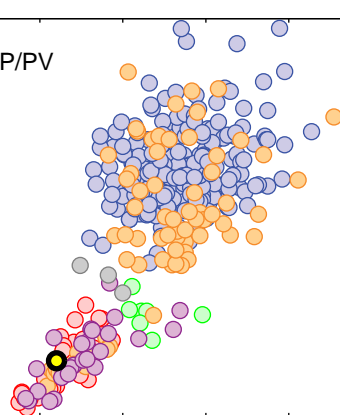

FR/PV

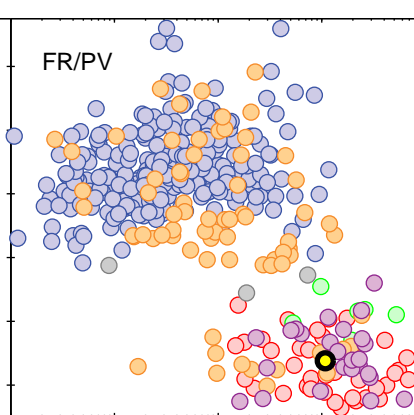

ISI Histogram [1540]

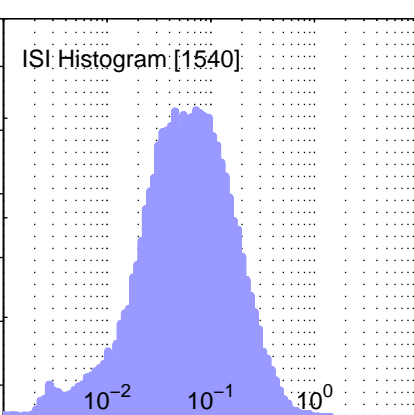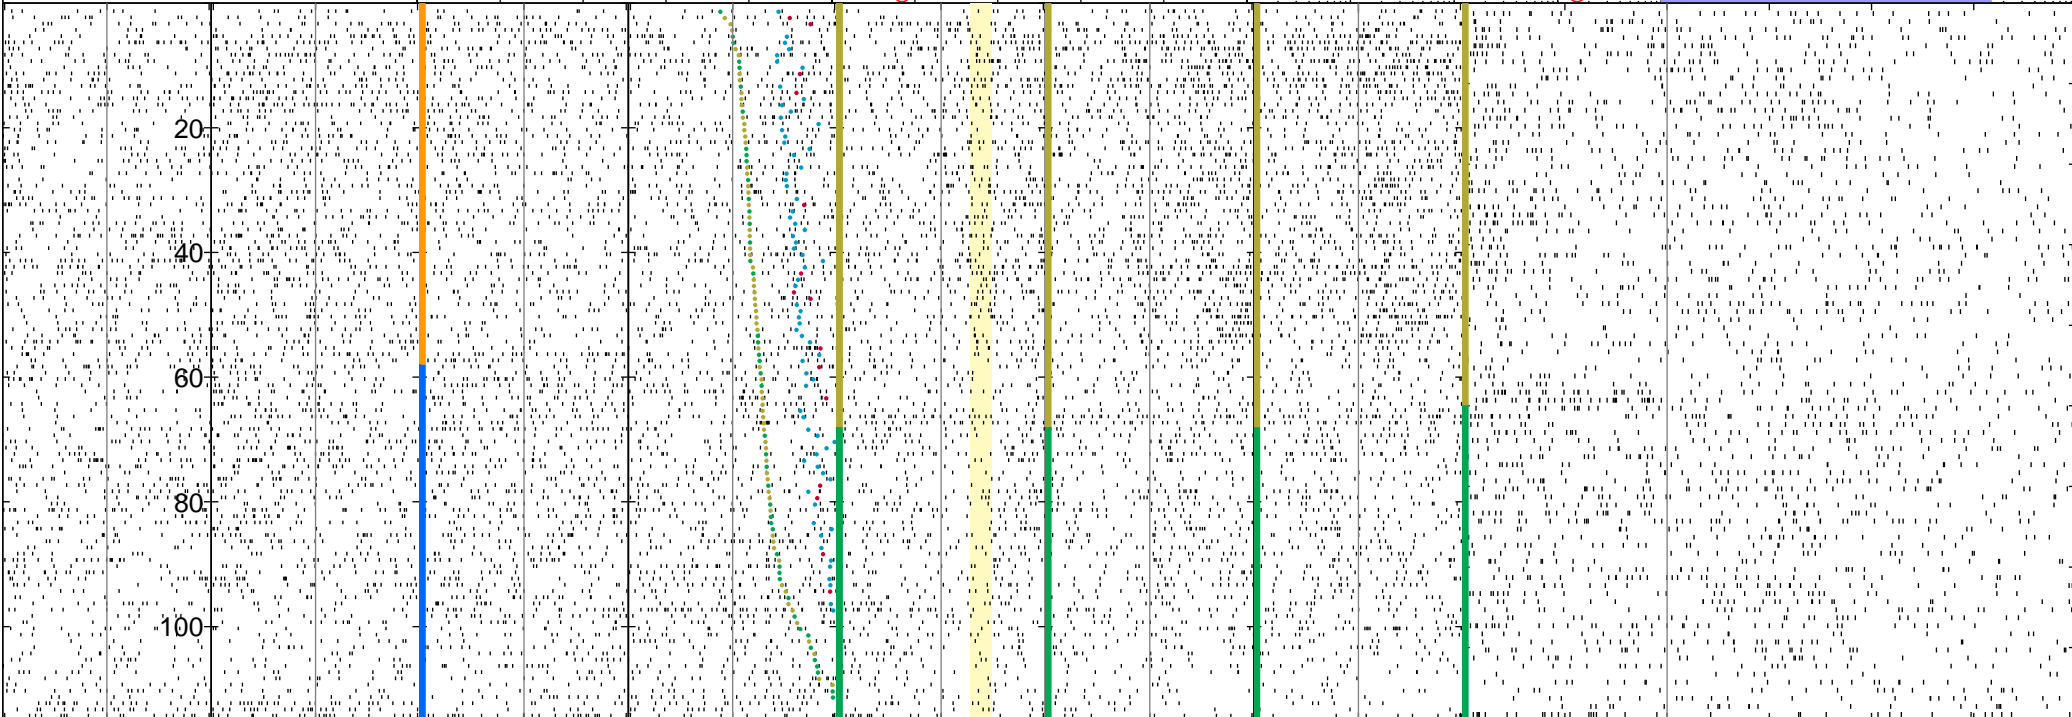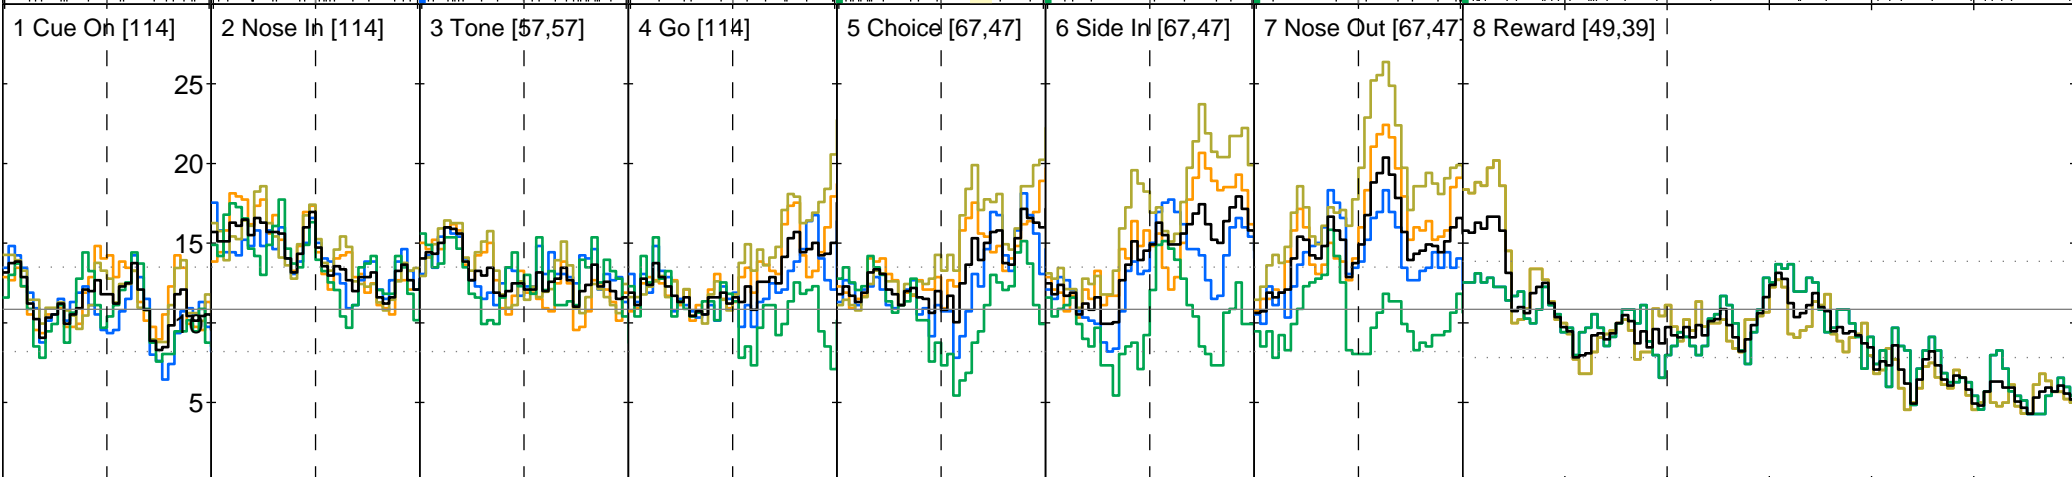

Cell: C0320070623T09j

AP: 1.6 ML: 3.7 DV: 5.3

w: 4 n: 29991  $P_{ISI>2}$ : 0.0052

1/2pw: 122 $\mu$ s p $\rightarrow$ v: 221 $\mu$ s

$\beta_T$ : 2  $\beta_D$ : 5.4

$\beta_P$ : 3.2 SI: 0.6

Session FR: 7.89 Hz

Pk Ev: 7 - Nose out (Ipsi)

Pk FR: 13.7Hz (0.21s) **FSI**

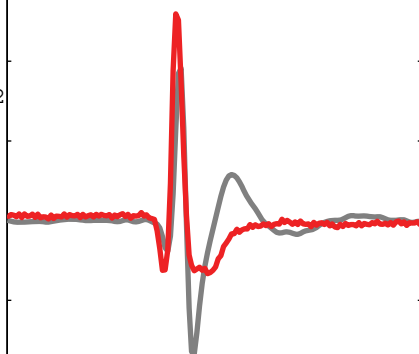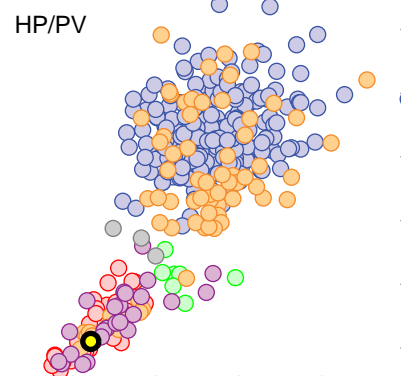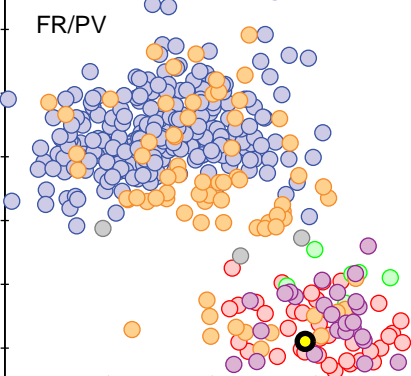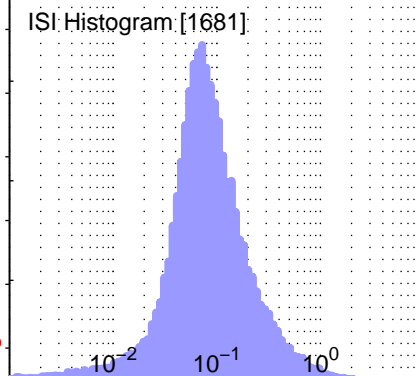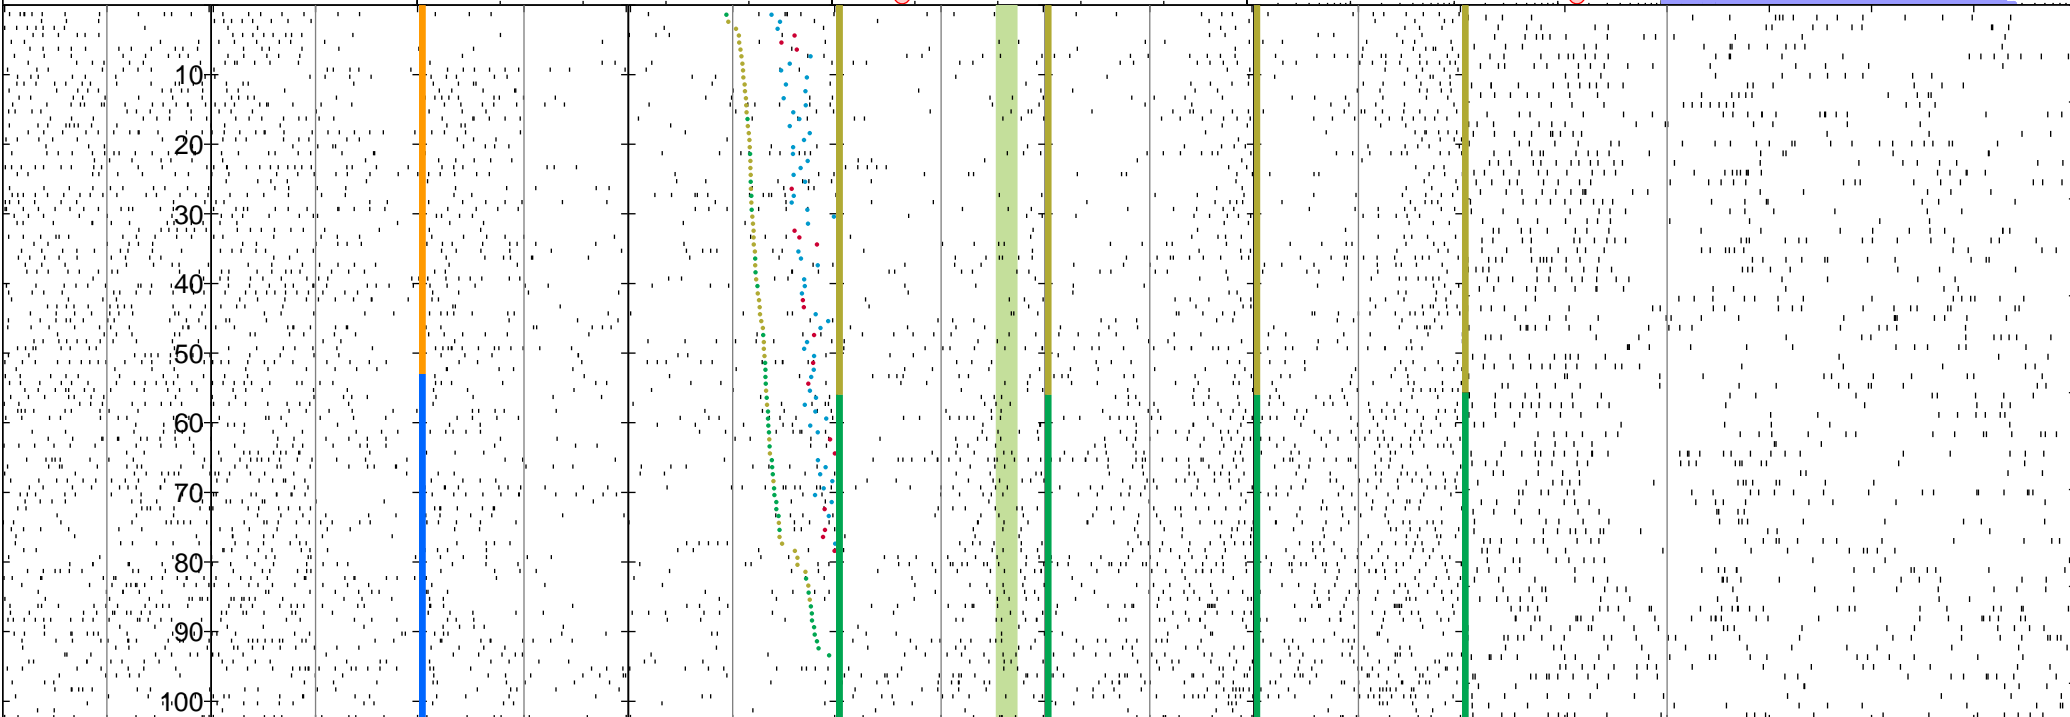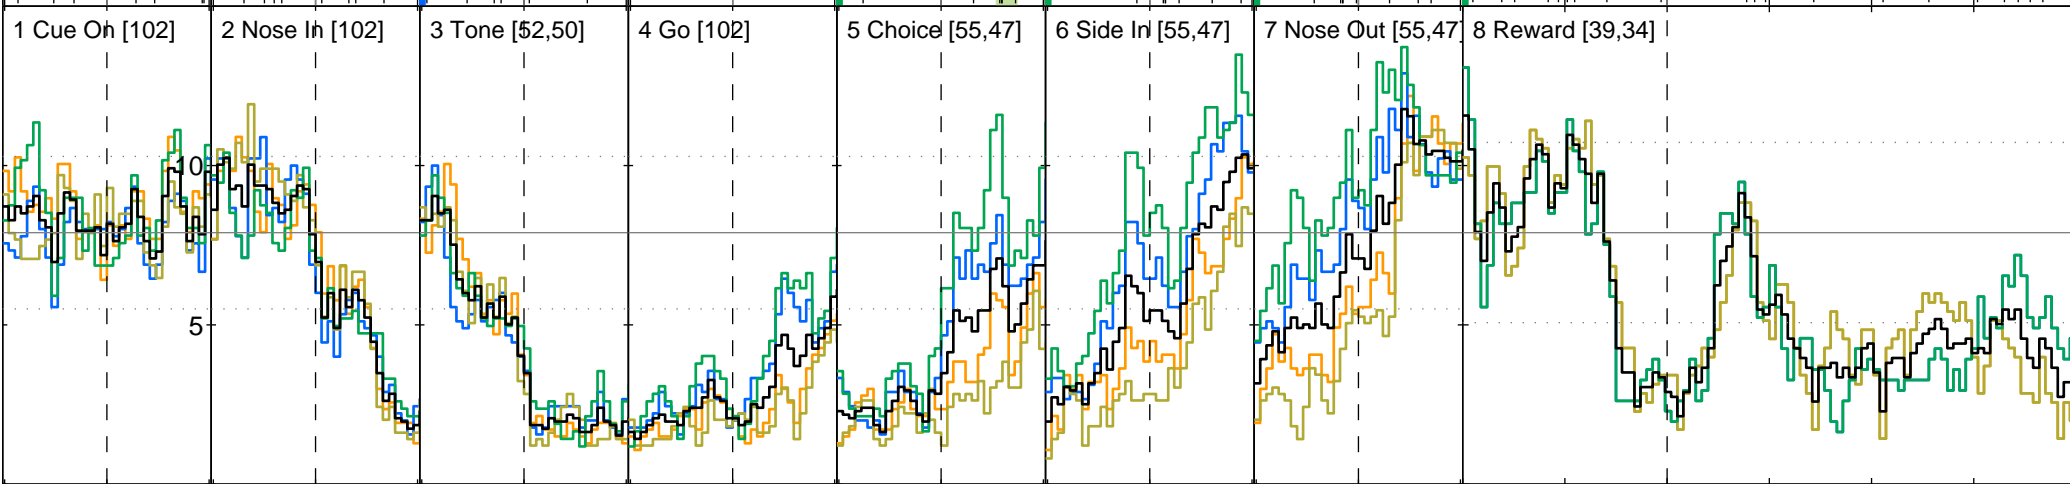



**Cell: C0320070611T09f**

AP: 1.6 ML: 3.7 DV: 4.7  
w: 3 n: 35511  $P_{ISI>2}$ : 0.081  
1/2pw: 142 $\mu$ s p->v: 405 $\mu$ s  
 $\beta_T$ : -2.4  $\beta_D$ : -3.7  
 $\beta_P$ : -3.1 SI: -0.92  
Session FR: 4.74 Hz  
Pk Ev: 7 - Nose out (Contra)  
Pk FR: 11.1Hz (0.6s) **FSI**

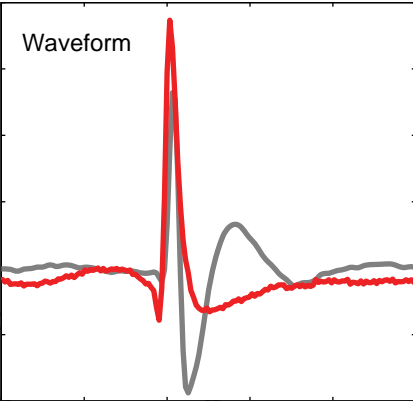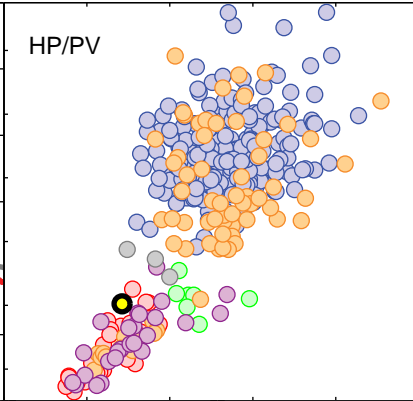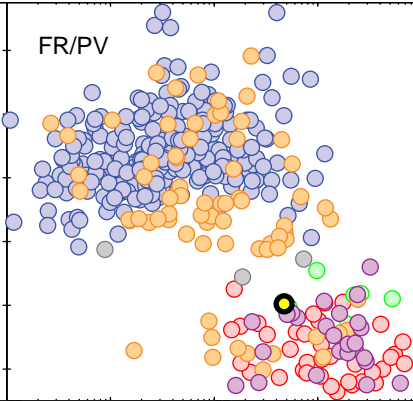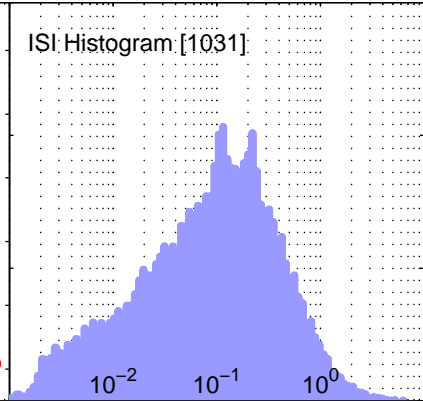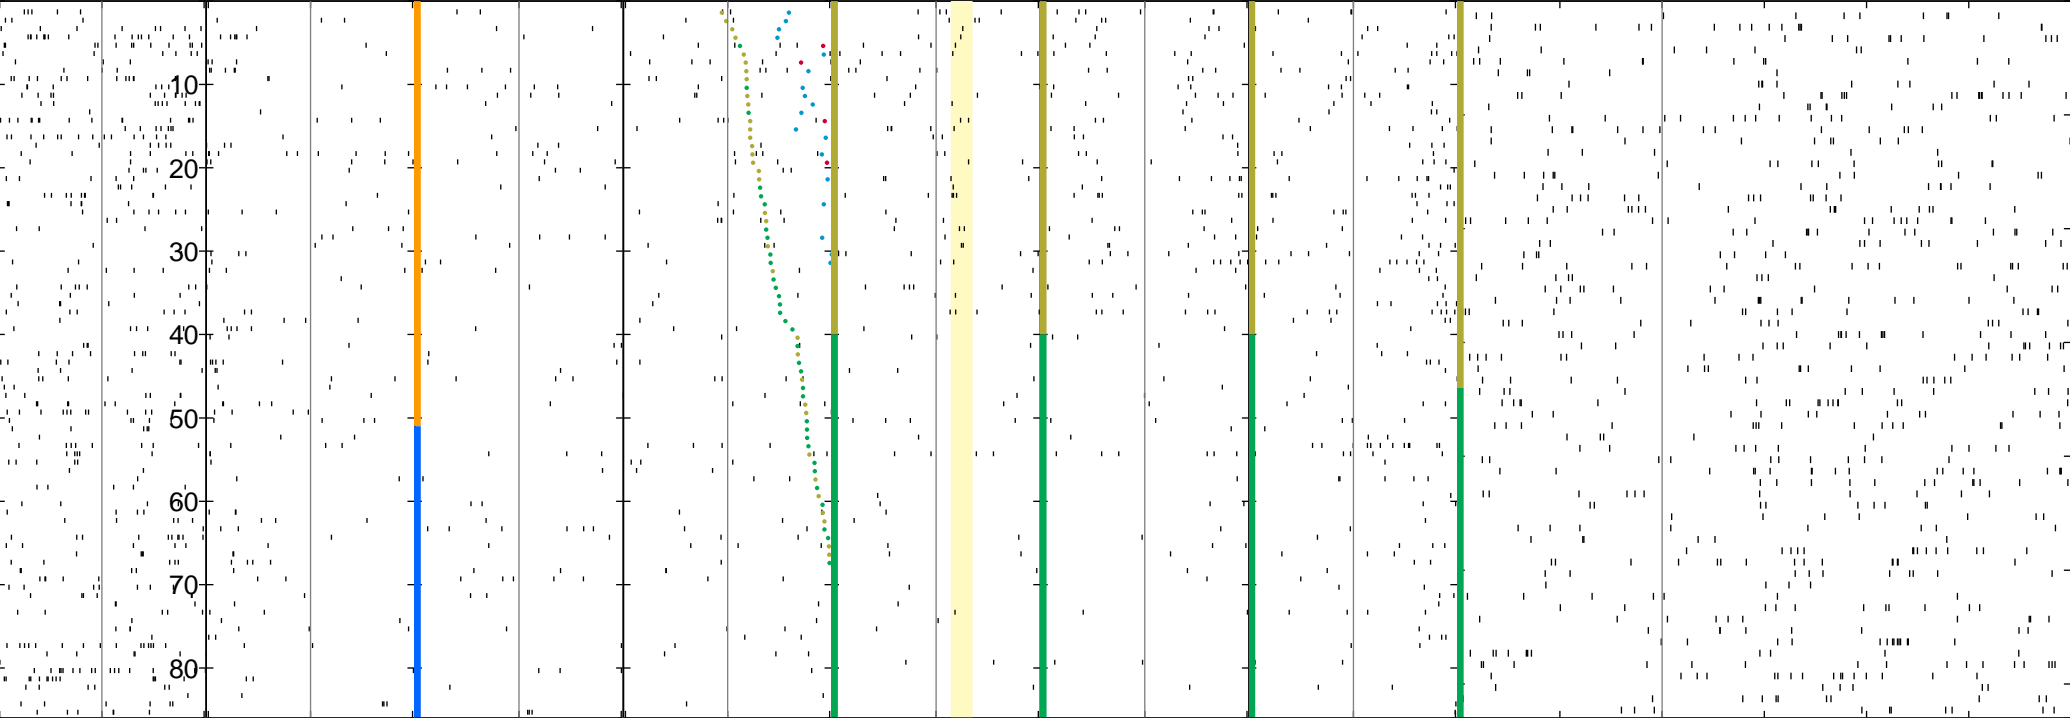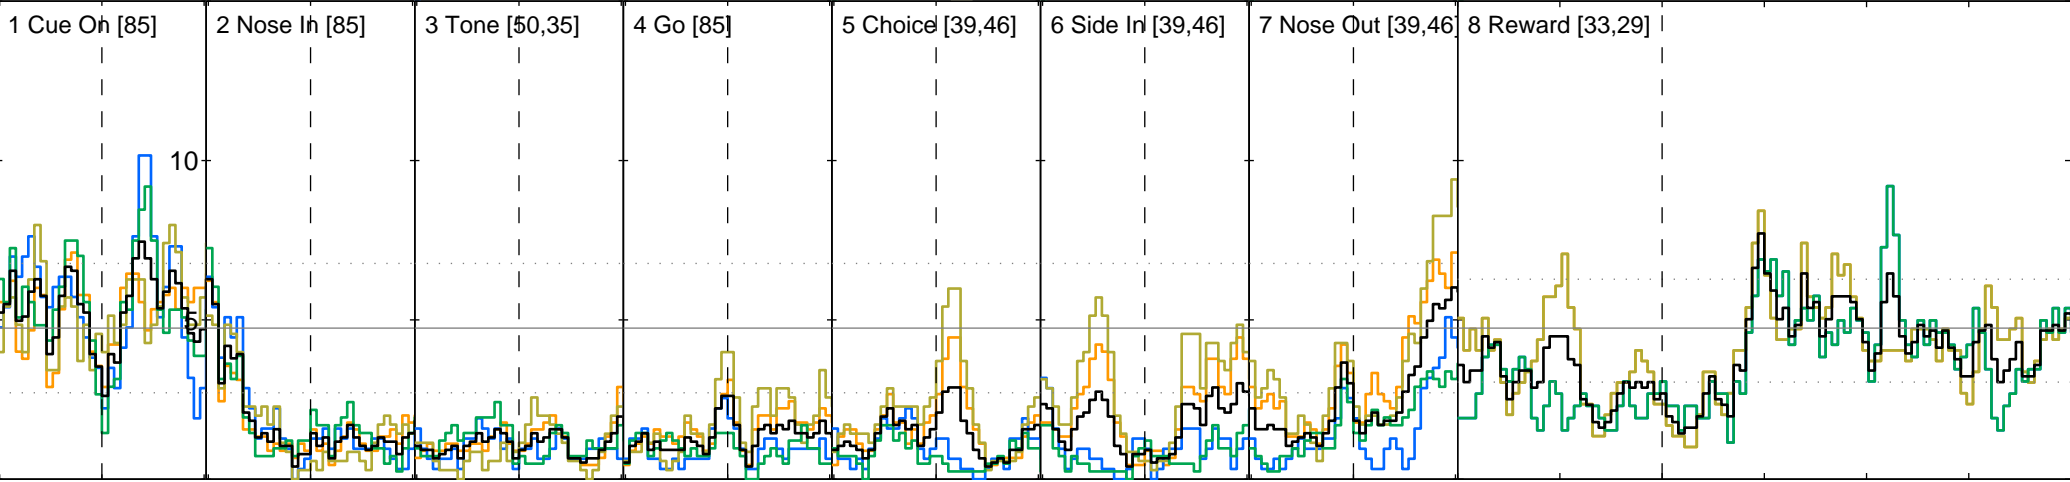

1 Cue On [85]

2 Nose In [85]

3 Tone [50,35]

4 Go [85]

5 Choice [39,46]

6 Side In [39,46]

7 Nose Out [39,46]

8 Reward [33,29]

Cell: C0320070622T07c

AP: 0.96 ML: 3.6 DV: 6.1

w: 3 n: 83618  $P_{ISI>2}$ : 0.039

1/2pw: 186 $\mu$ s p->v: 333 $\mu$ s

$\beta_T$ : -3.1  $\beta_D$ : -7.1

$\beta_P$ : -3.8 SI: -0.47

Session FR: 21.1 Hz

Pk Ev: 7 - Nose out (Ipsi)

Pk FR: 59.1Hz (0.75s) **FSI**

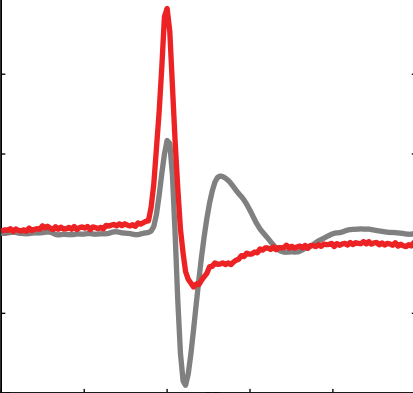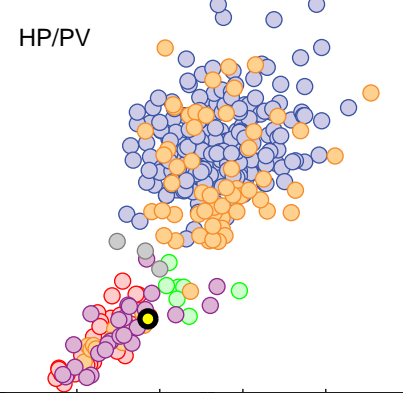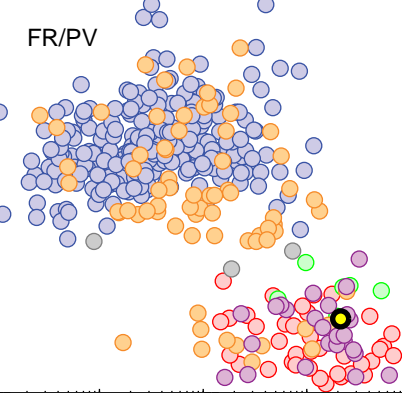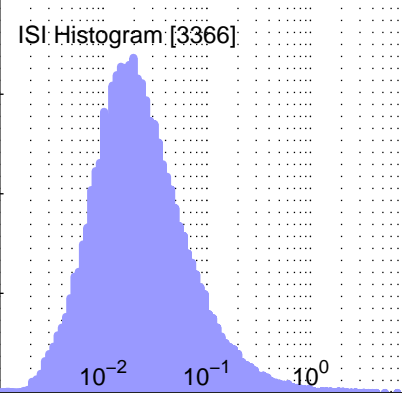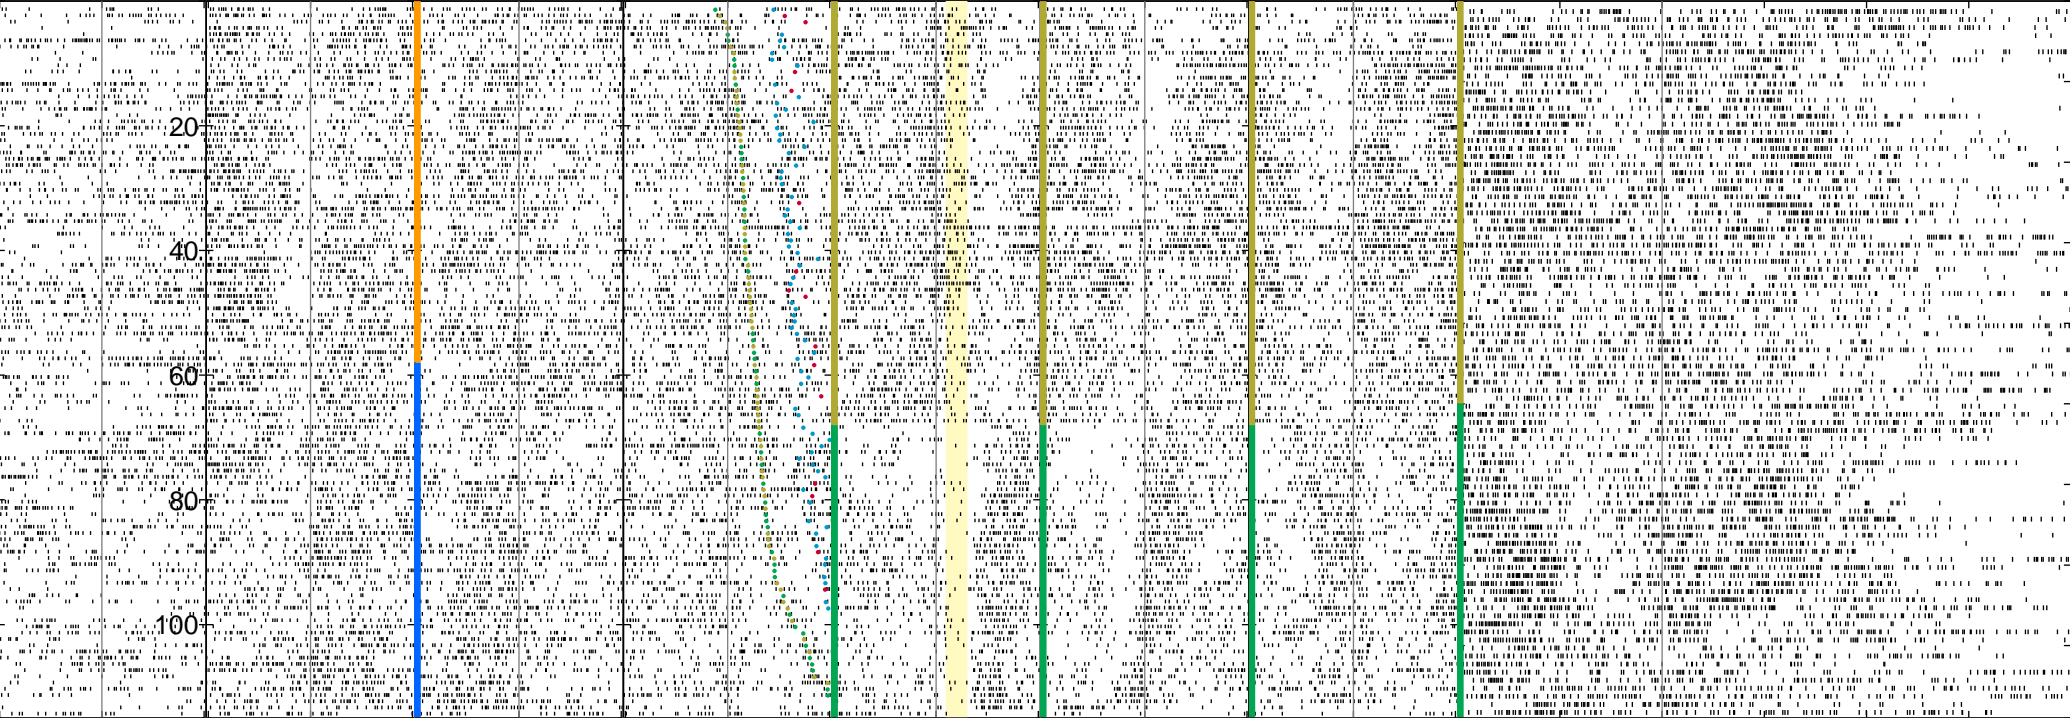

1 Cue On [114] 2 Nose In [114] 3 Tone [57,57] 4 Go [114] 5 Choice [67,47] 6 Side In [67,47] 7 Nose Out [67,47] 8 Reward [49,39]

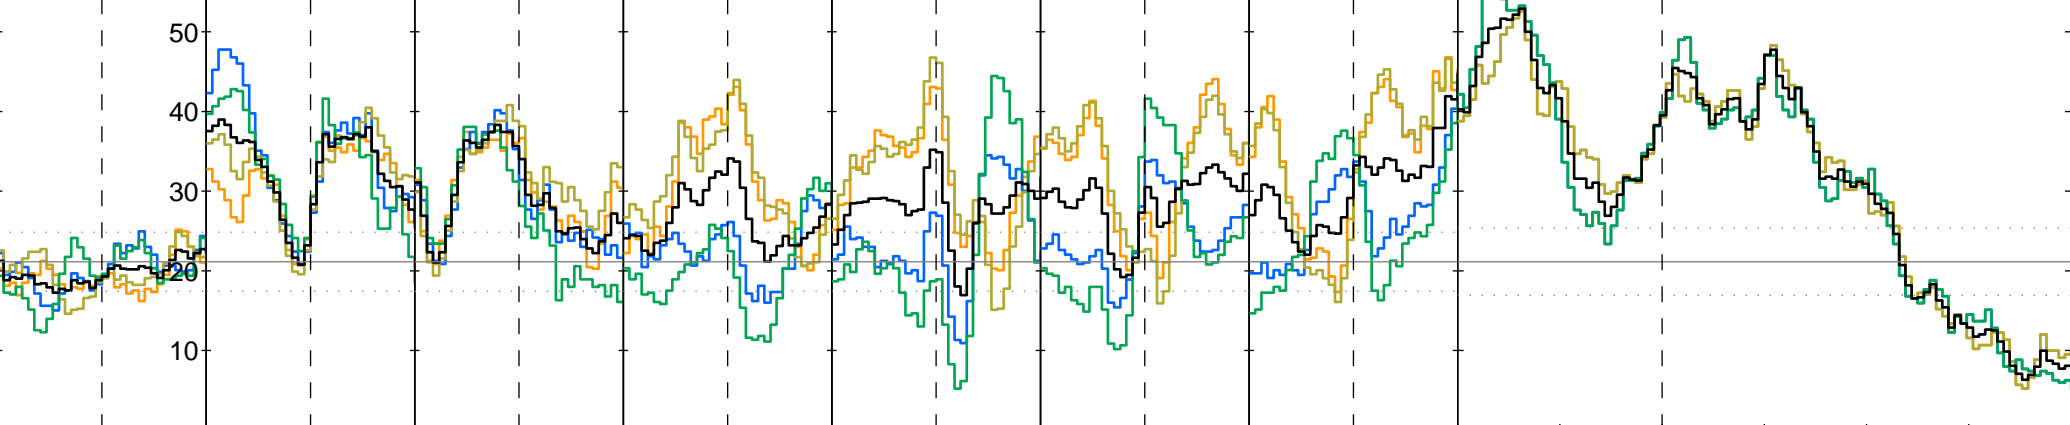

**Cell: C0520070405T11c**

AP: -0.48 ML: 4.6 DV: 4.4  
w: 4 n: 3563  $P_{ISI>2}$ : 0.098  
1/2pw: 115 $\mu$ s p->v: 190 $\mu$ s  
 $\beta_T$ : -1.9  $\beta_D$ : -1.2  
 $\beta_P$ : 1.8 SI: NaN  
Session FR: 2.23 Hz  
Pk Ev: 7 - Nose out (Tone2)  
Pk FR: 6.4Hz (1.11s) **FSI**

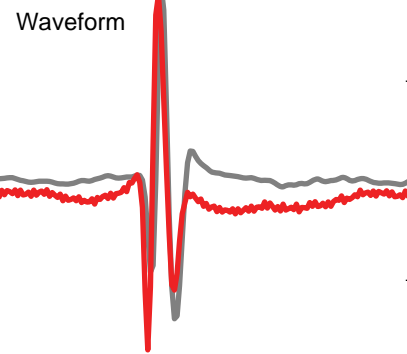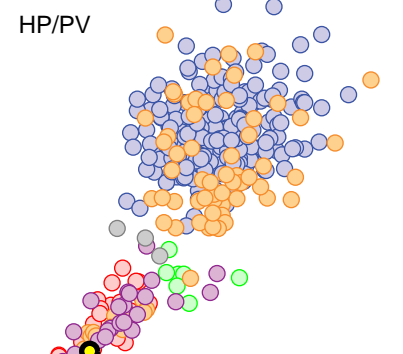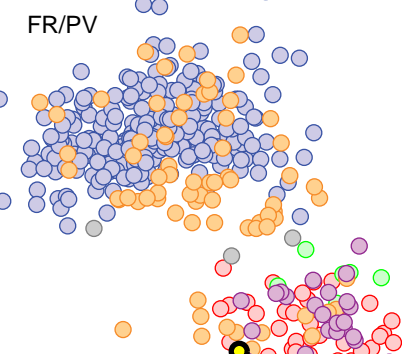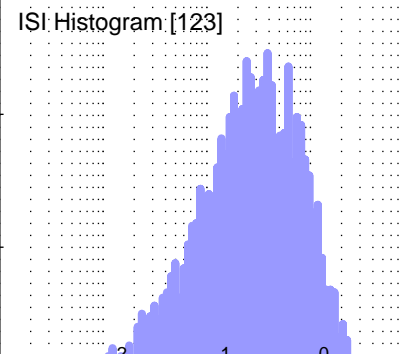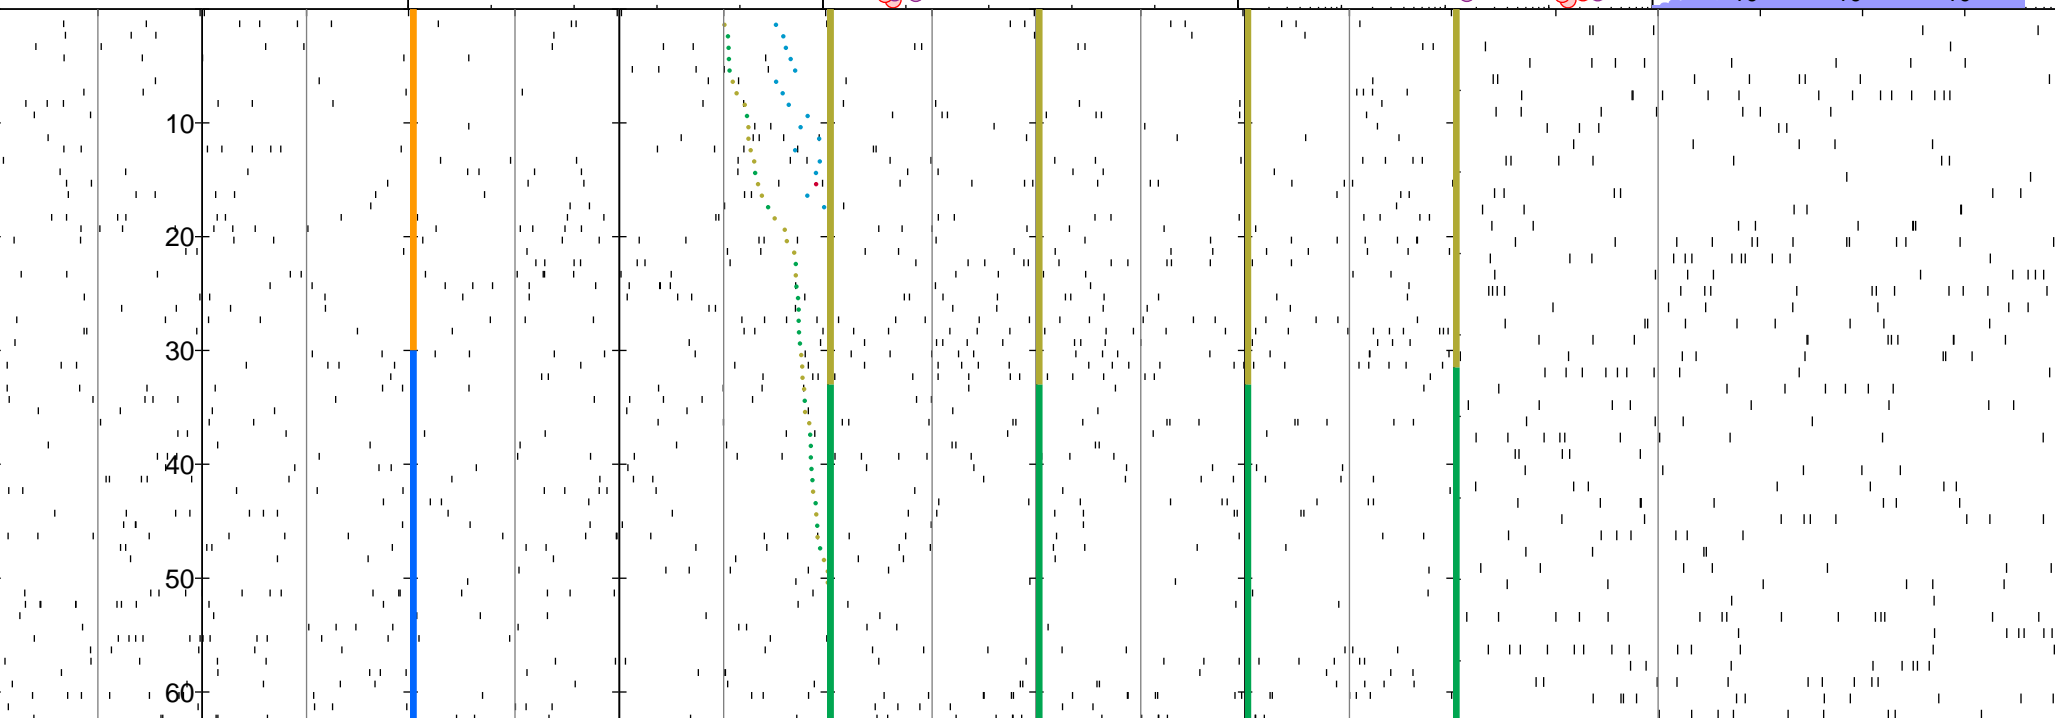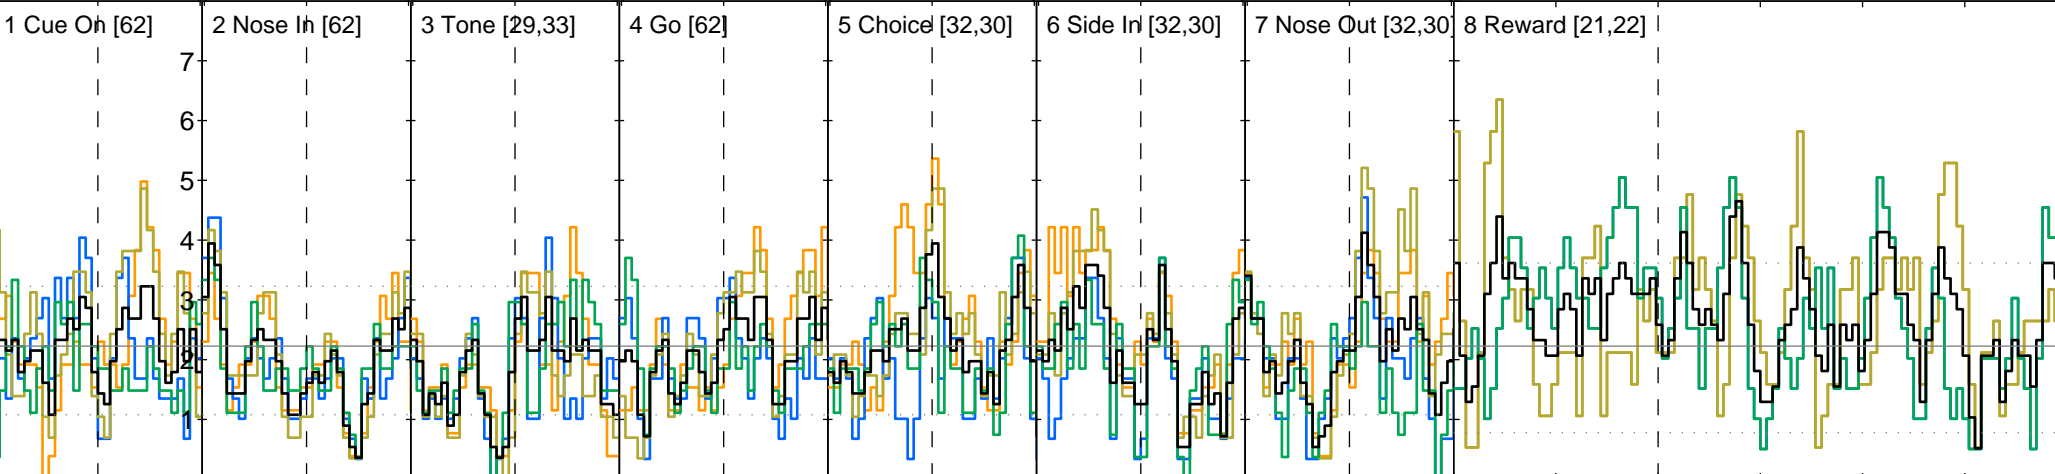

**Cell: C0320070613T09g**

AP: 1.6 ML: 3.7 DV: 4.7

w: 4 n: 11888  $P_{ISI>2}$ : 0.181/2pw: 78 $\mu$ s p $\rightarrow$ v: 174 $\mu$ s $\beta_T$ : -1.8  $\beta_D$ : -3.3 $\beta_P$ : -3 SI: -0.82

Session FR: 4.25 Hz

Pk Ev: 8 - Reward (T1/Con)

Pk FR: 25.2Hz (-0.76s) **FSI**

Waveform

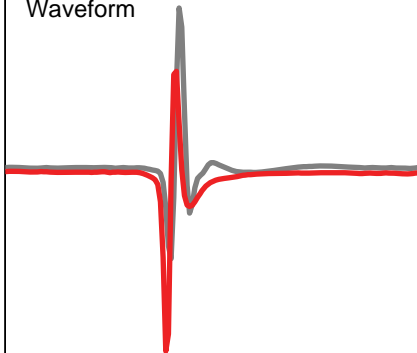

HP/PV

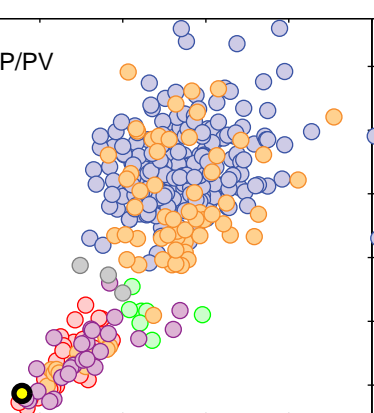

FR/PV

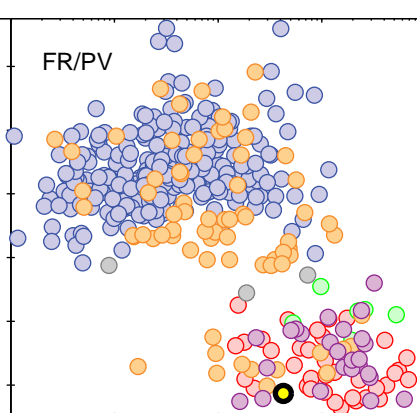

ISI Histogram [276]

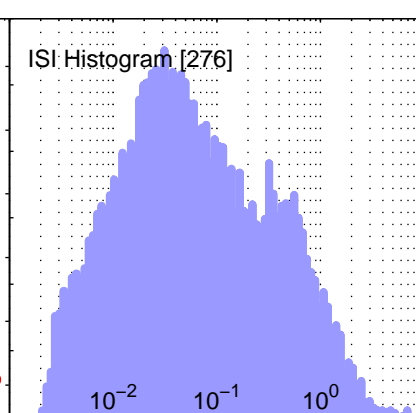10  
20  
30  
40  
50  
60  
70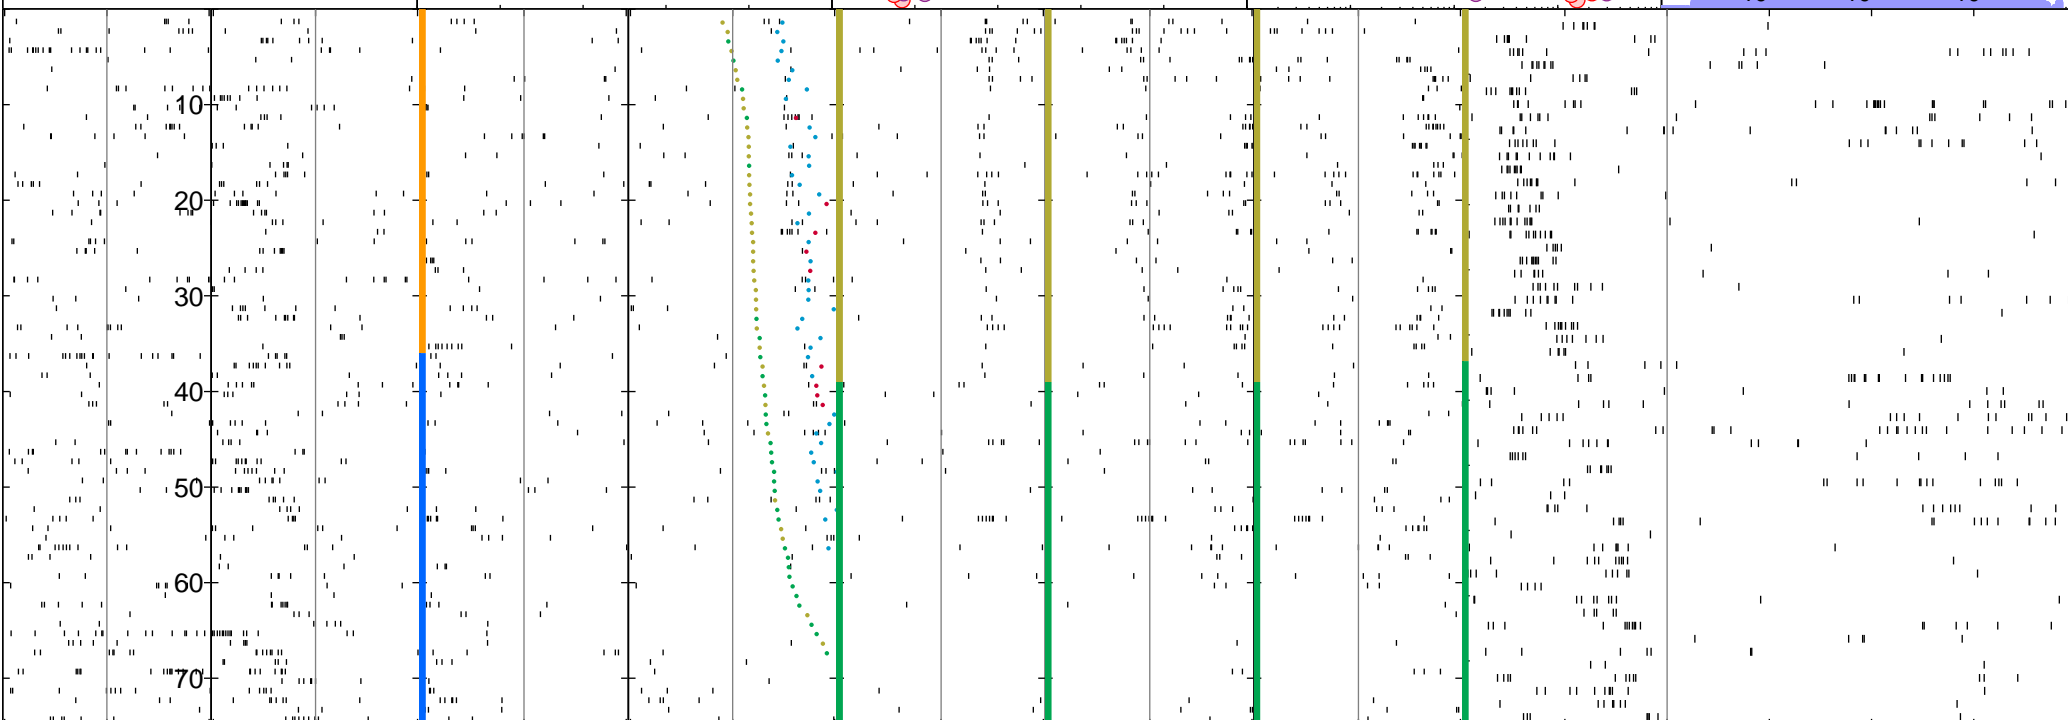

1 Cue On [74]

2 Nose In [74]

3 Tone [35,39]

4 Go [74]

5 Choice [38,36]

6 Side In [38,36]

7 Nose Out [38,36]

8 Reward [26,28]

25  
20  
15  
10  
5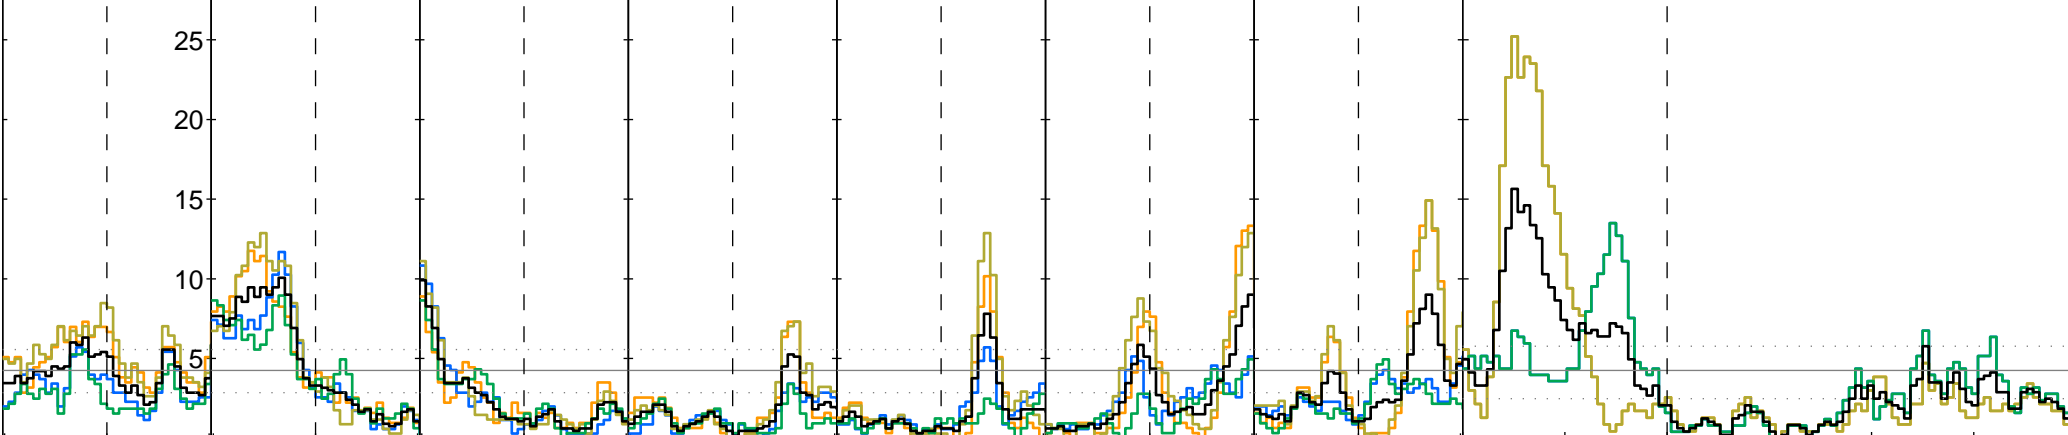



Cell: C0320070624T11f

AP: -0.96 ML: 3.7 DV: 6.1

w: 3 n: 20234  $P_{ISI>2}$ : 0.065

1/2pw: 142 $\mu$ s p $\rightarrow$ v: 262 $\mu$ s

$\beta_T$ : -3.8  $\beta_D$ : 3.4

$\beta_P$ : 3.1 SI: 0.33

Session FR: 5.41 Hz

Pk Ev: 8 - Reward (T1/Con)

Pk FR: 13.8Hz (-0.58s) **FSI**

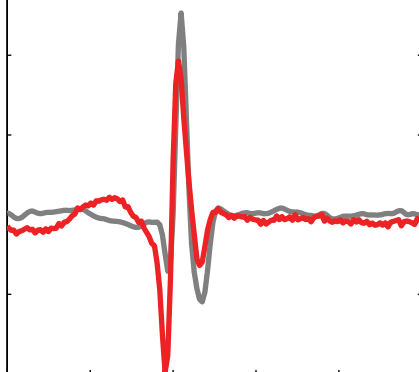

HP/PV

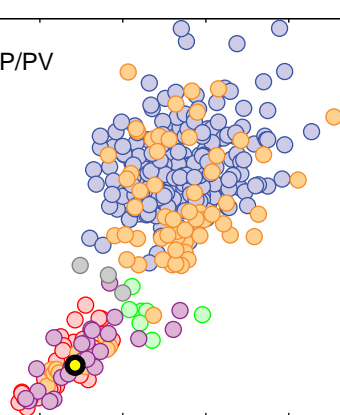

FR/PV

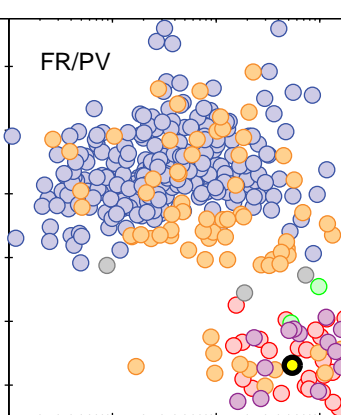

ISI Histogram [635]

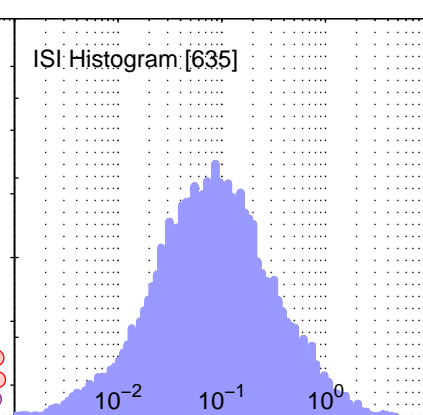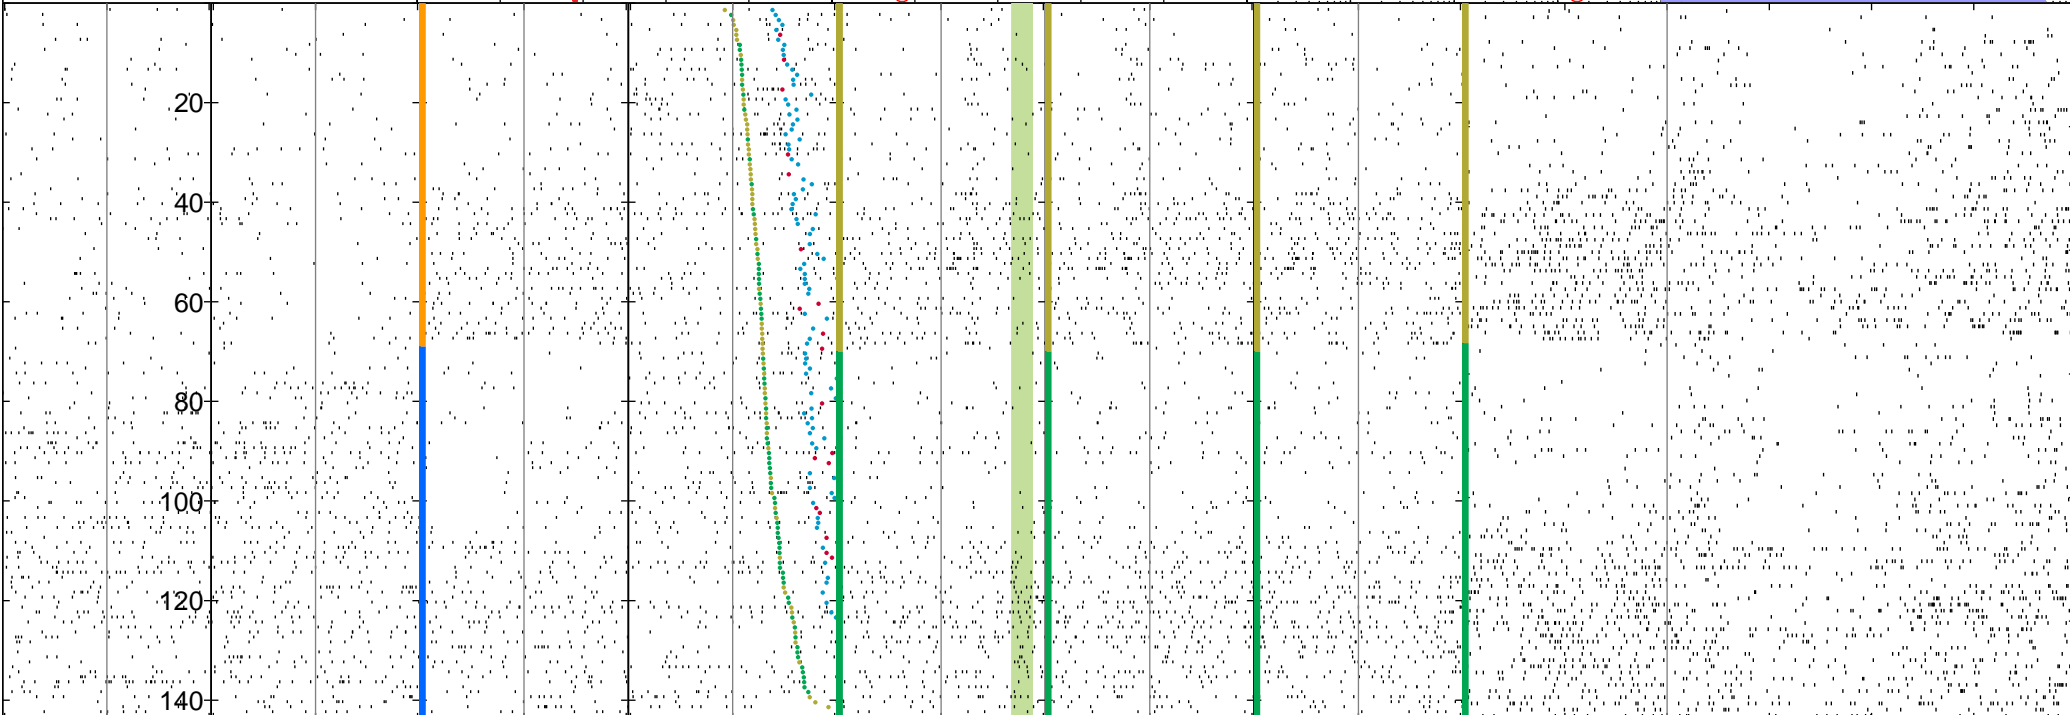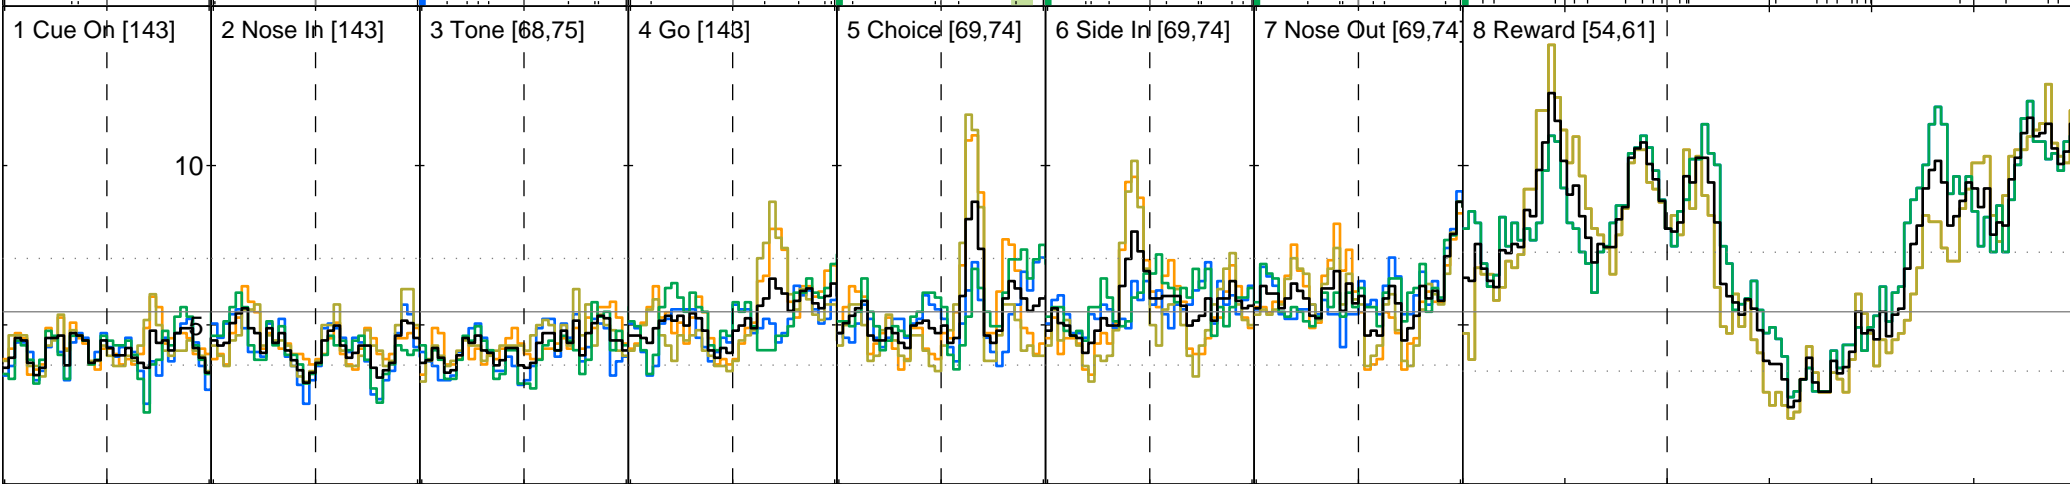

Cell: C0320070613T11a

AP: -0.96 ML: 3.7 DV: 5

w: 3 n: 9187  $P_{ISI>2}$ : 0.35

1/2pw: 155 $\mu$ s p $\rightarrow$ v: 451 $\mu$ s

$\beta_T$ : 2.4  $\beta_D$ : -6.4

$\beta_P$ : 3.1 SI: -0.68

Session FR: 1.57 Hz

Pk Ev: 8 - Reward (T1/Con)

Pk FR: 6.1Hz (-0.01s) **FSI**

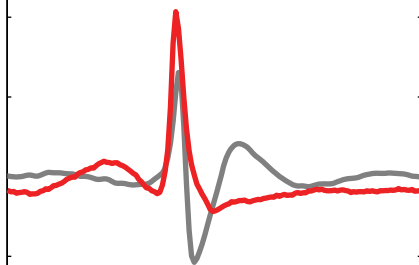

HP/PV

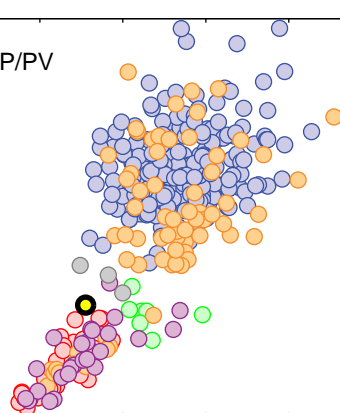

FR/PV

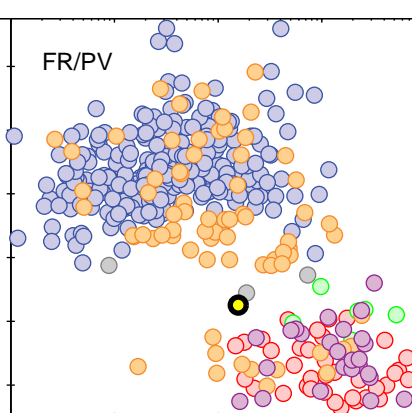

ISI Histogram [257]

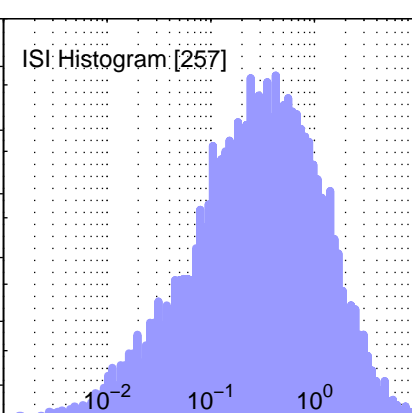

50

100

150

1 Cue On [153]

2 Nose In [153]

3 Tone [78,75]

4 Go [158]

5 Choice [73,80]

6 Side In [73,80]

7 Nose Out [73,80]

8 Reward [51,58]

7

6

5

4

3

2

1

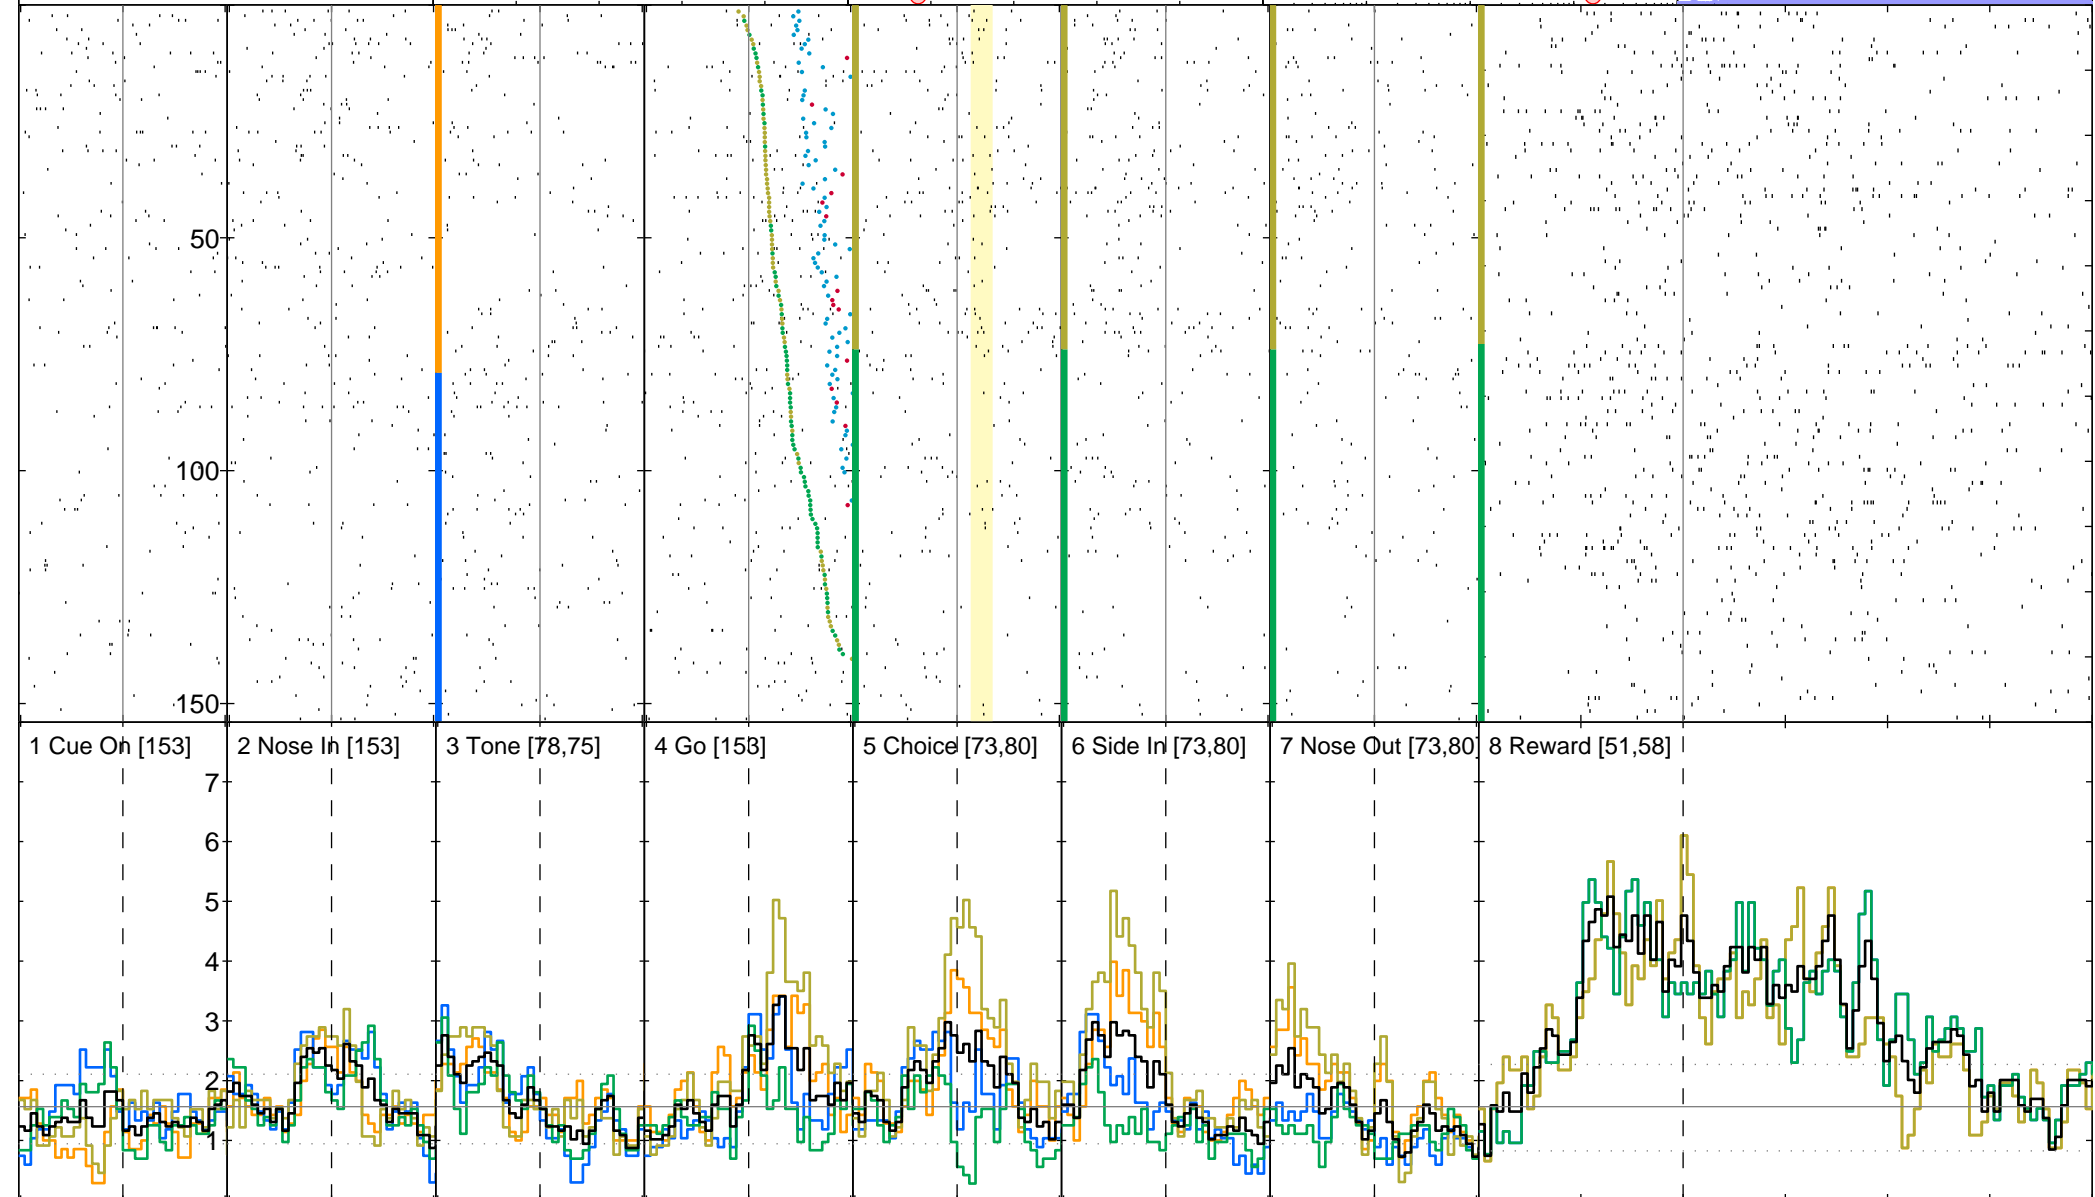

Cell: C0320070623T11e

AP: -0.96 ML: 3.7 DV: 5.9

w: 4 n: 87621  $P_{ISI>2}$ : 0

1/2pw: 110 $\mu$ s p->v: 216 $\mu$ s

$\beta_T$ : -3.8  $\beta_D$ : -3.8

$\beta_P$ : 4.1 SI: -0.2

Session FR: 23.1 Hz

Pk Ev: 8 - Reward (T1/Con)

Pk FR: 47.9Hz (0.05s) **FSI**

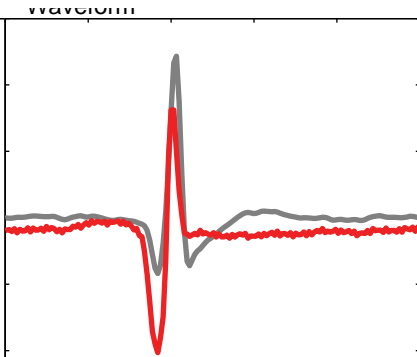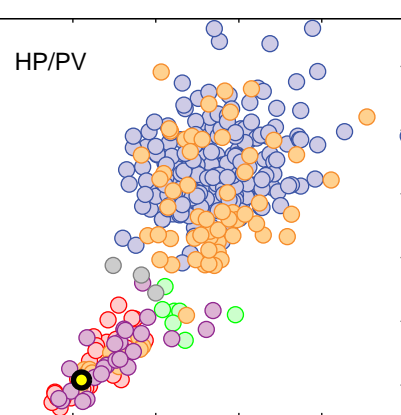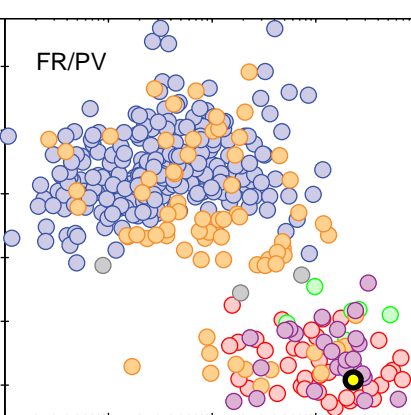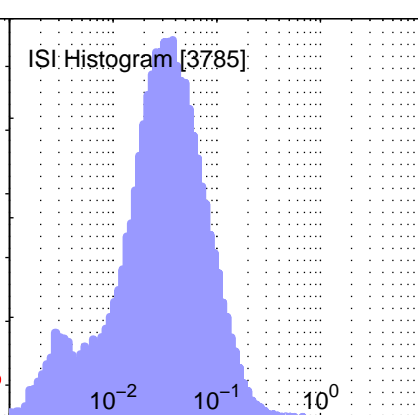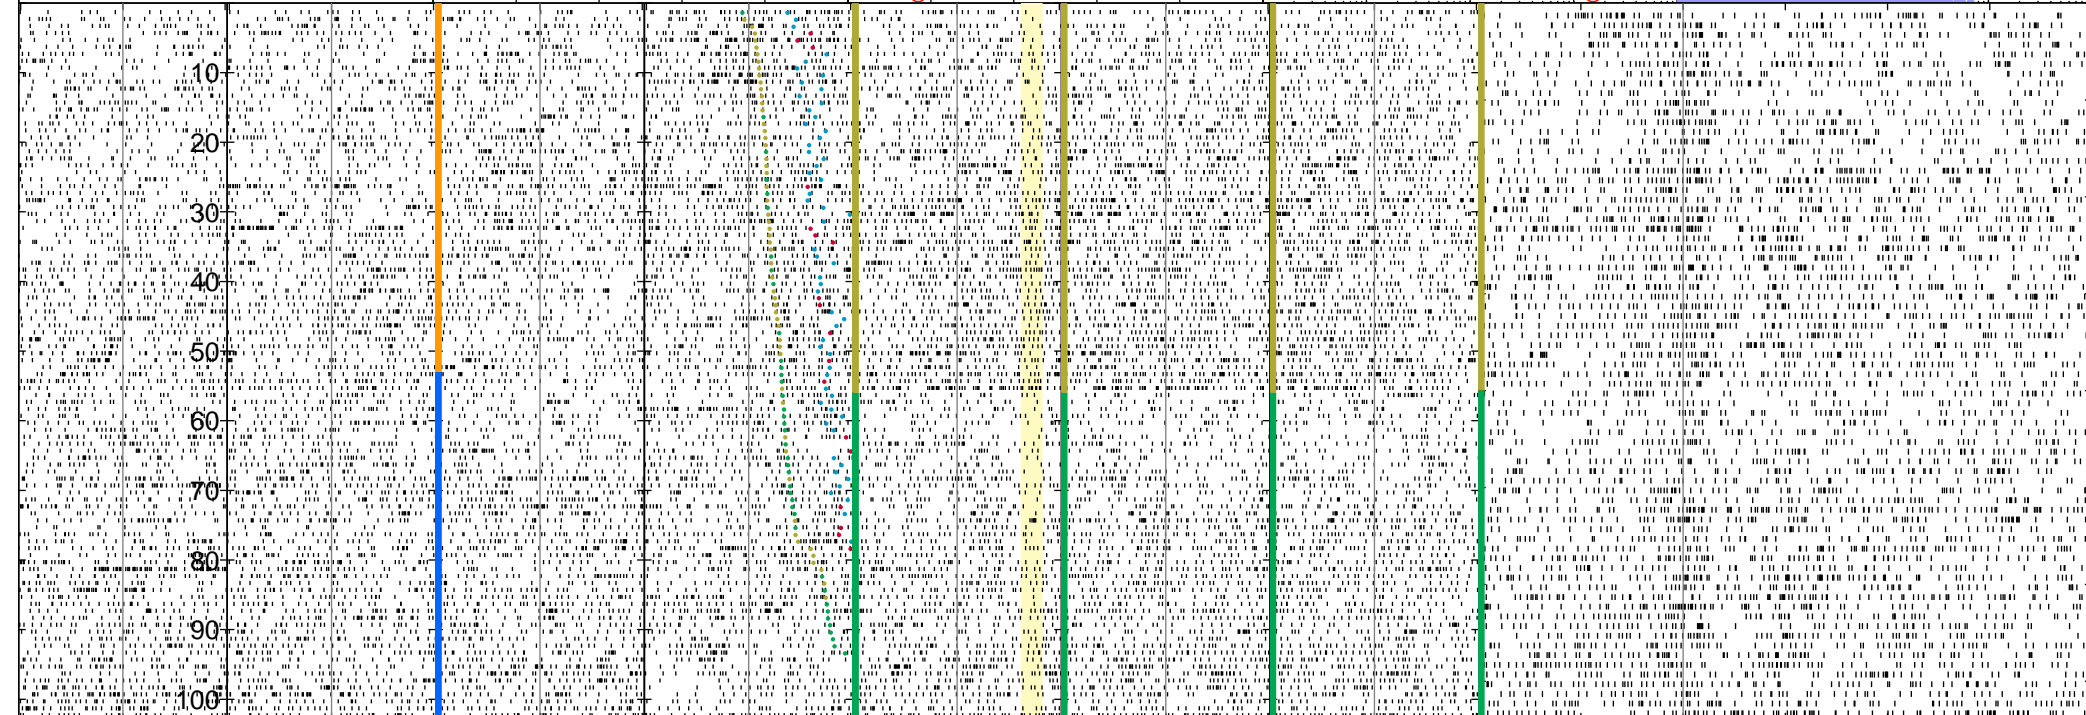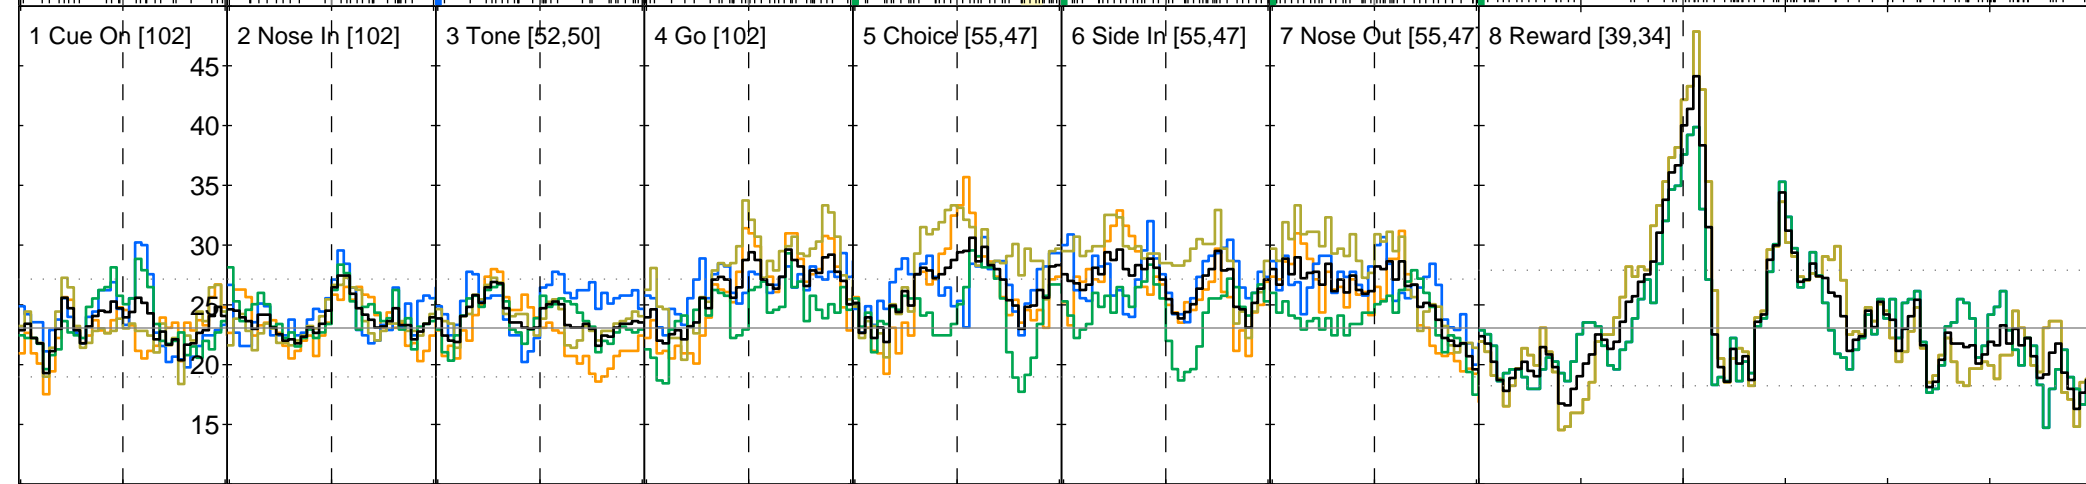

Cell: C0320070619T07h

AP: 0.96 ML: 3.6 DV: 5.8

w: 2 n: 13735  $P_{ISI>2}$ : 0.068

1/2pw: 128 $\mu$ s p $\rightarrow$ v: 309 $\mu$ s

$\beta_T$ : 2.1  $\beta_D$ : -2.2

$\beta_P$ : 3.7 SI: -0.2

Session FR: 3.24 Hz

Pk Ev: 8 - Reward (T2/Ipsi)

Pk FR: 13.5Hz (0.08s) **FSI**

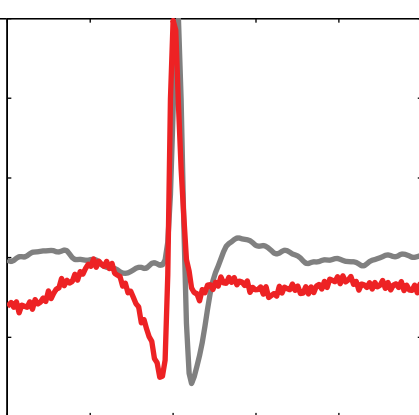

HP/PV

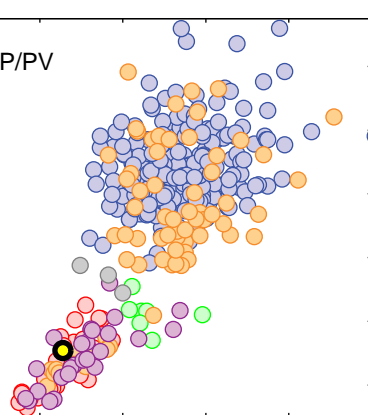

FR/PV

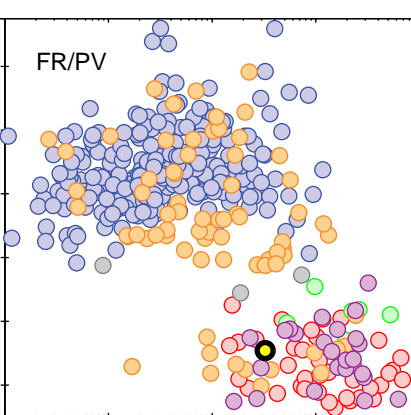

ISI Histogram [365]

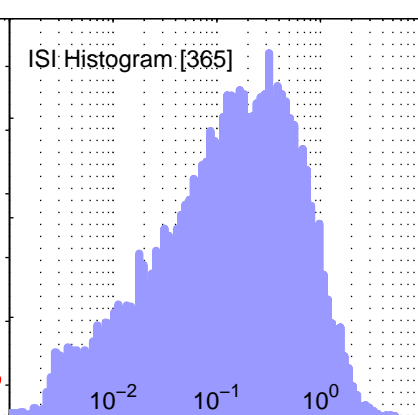

10  
20  
30  
40  
50  
60  
70  
80  
90

1 Cue On [94]

2 Nose In [94]

3 Tone [50,44]

4 Go [94]

5 Choice [47,47]

6 Side In [47,47]

7 Nose Out [47,47]

8 Reward [34,32]

10

5

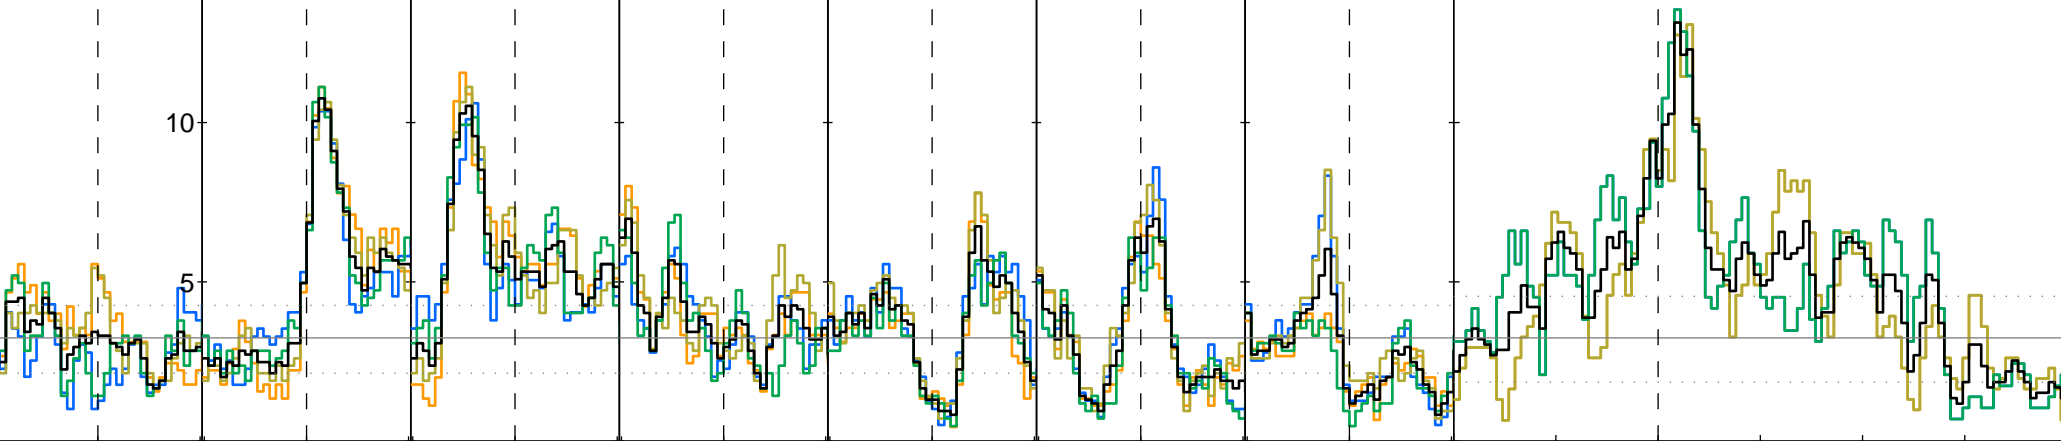



Cell: C0520070406T12a

AP: -0.48 ML: 3.9 DV: 5.1

w: 2 n: 147270  $P_{ISI>2}$ : 0

1/2pw: 104 $\mu$ s p $\rightarrow$ v: 190 $\mu$ s

$\beta_T$ : 2.6  $\beta_D$ : 3.3

$\beta_P$ : -4.4 SI: -0.13

Session FR: 33.7 Hz

Pk Ev: 8 - Reward (T1/Con)

Pk FR: 57.8Hz (0.08s) **FSI**

Waveform

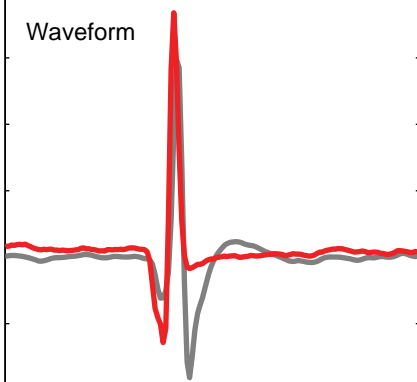

HP/PV

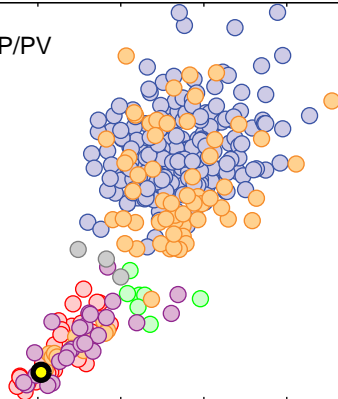

FR/PV

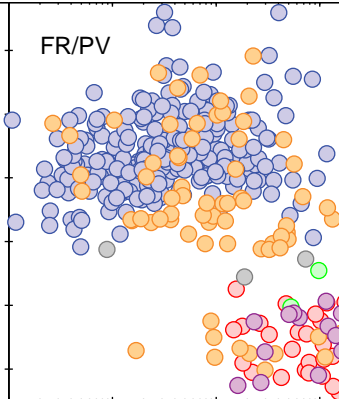

ISI Histogram [8223]

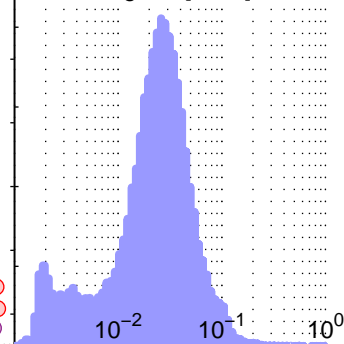

50

100

150

1 Cue On [151]

2 Nose In [151]

3 Tone [67,84]

4 Go [151]

5 Choice [75,76]

6 Side In [75,76]

7 Nose Out [75,76]

8 Reward [54,62]

55

50

45

40

35

30

25

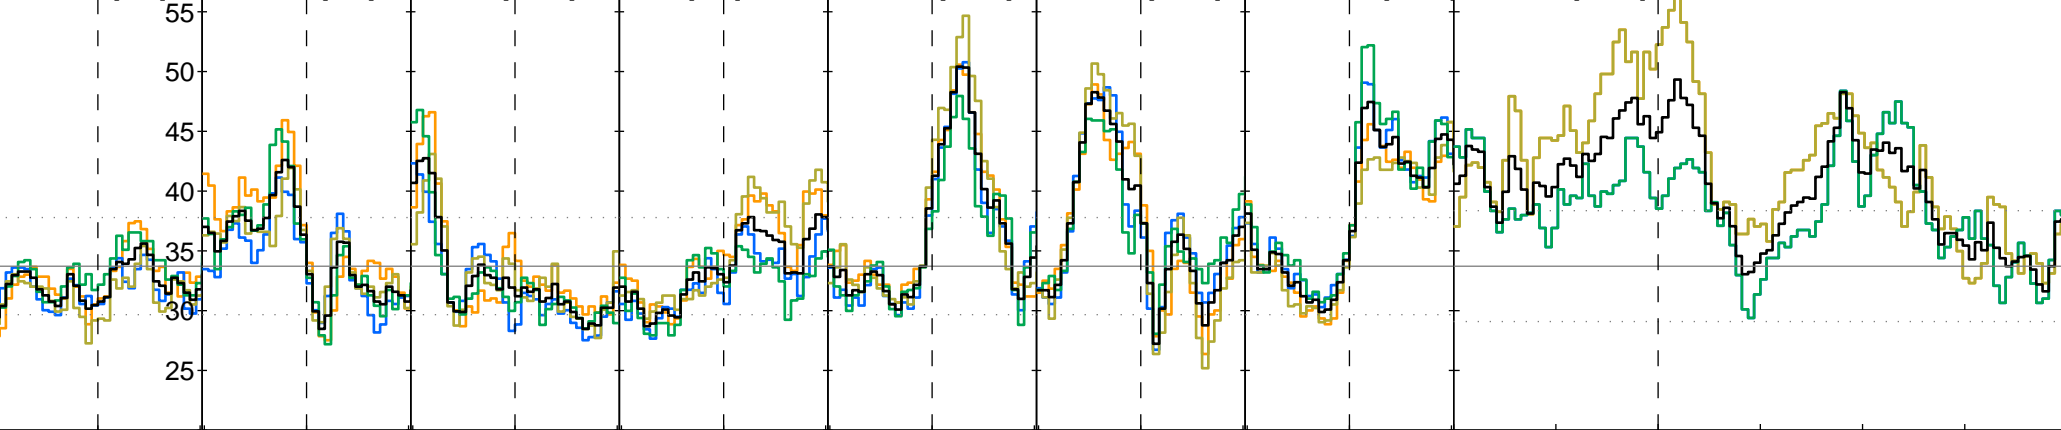

**Cell: C0320070703T07a**

AP: 0.96 ML: 3.6 DV: 8

w: 4 n: 27059  $P_{ISI>2}$ : 0.0181/2pw: 165 $\mu$ s p $\rightarrow$ v: 317 $\mu$ s $\beta_T$ : -2.6  $\beta_D$ : -4.8 $\beta_P$ : -3.5 SI: -0.8

Session FR: 6.21 Hz

Pk Ev: 8 - Reward (T1/Con)

Pk FR: 28.7Hz (0.11s) **FSI**

Waveform

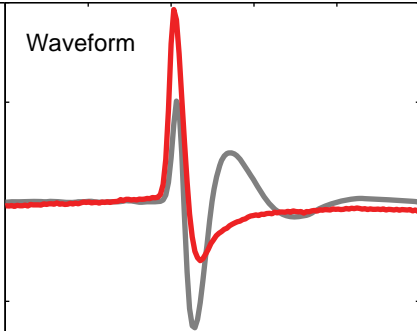

HP/PV

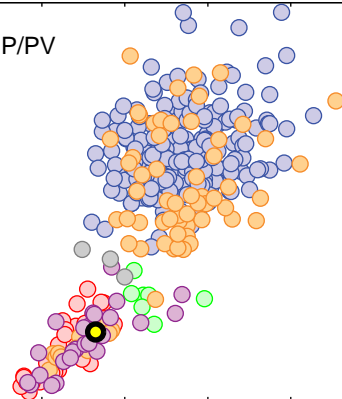

FR/PV

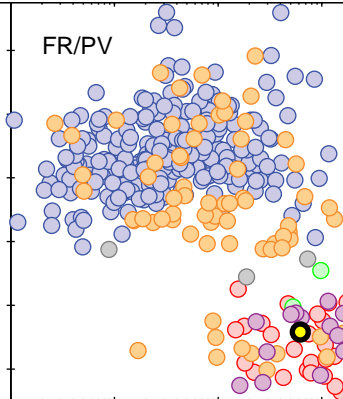

ISI Histogram [923]

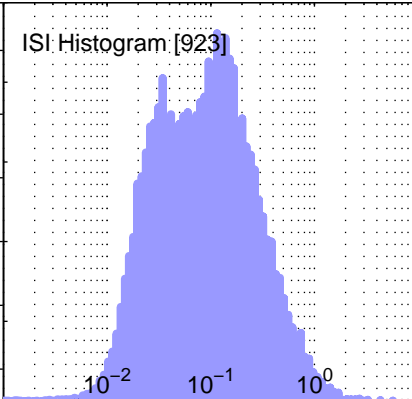

20

40

60

80

100

1 Cue On [116]

2 Nose In [116]

3 Tone [50,66]

4 Go [116]

5 Choice [57,59]

6 Side In [57,59]

7 Nose Out [57,59]

8 Reward [43,52]

25

20

15

10

5

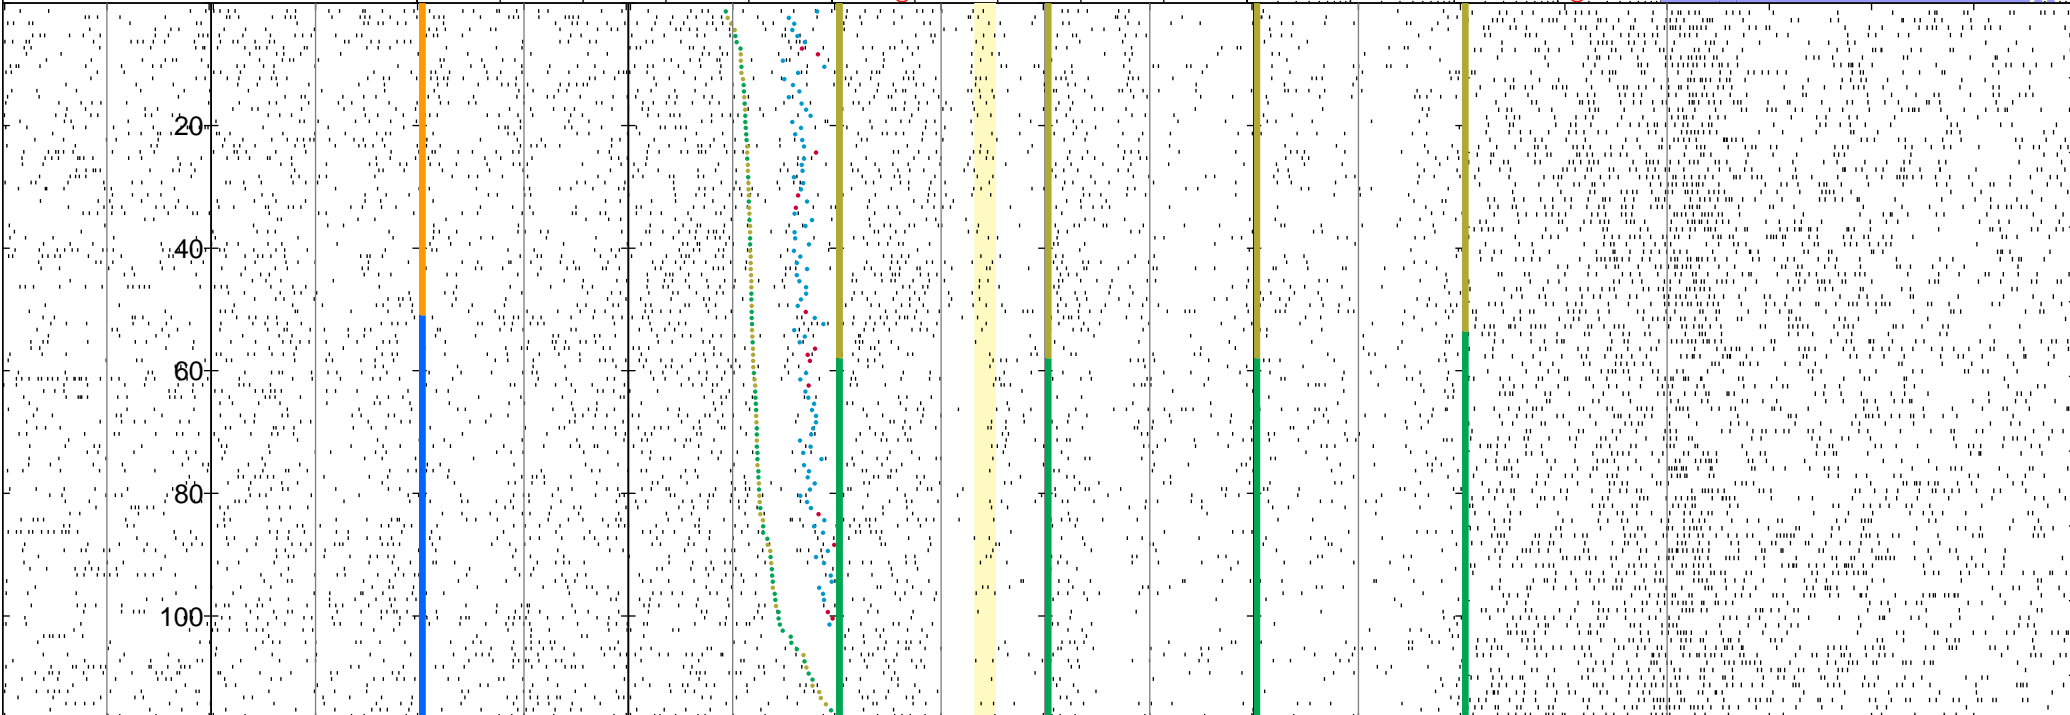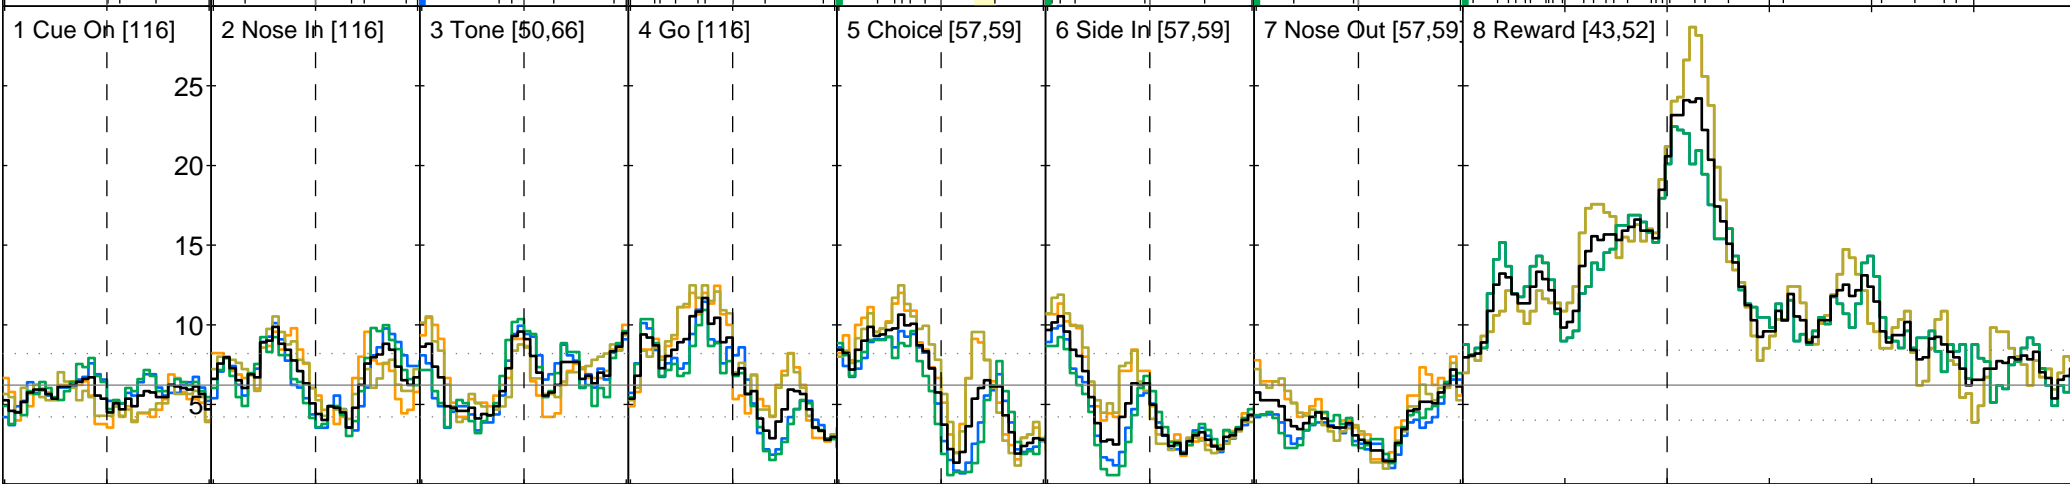

**Cell: C0320070624T09a**

AP: 1.6 ML: 3.7 DV: 5.4  
w: 1 n: 29299  $P_{ISI>2}$ : 0.042  
1/2pw: 112 $\mu$ s p $\rightarrow$ v: 187 $\mu$ s  
 $\beta_T$ : 2.6  $\beta_D$ : 3.6  
 $\beta_P$ : -3.4 SI: 0.56  
Session FR: 7.83 Hz  
Pk Ev: 8 - Reward (T2/Ipsi)  
Pk FR: 33.7Hz (0.2s) **FSI**

## Waveform

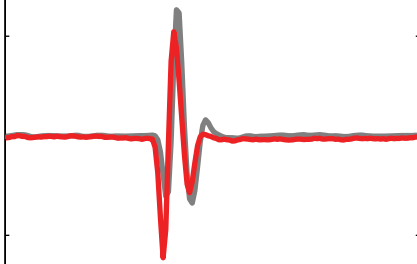

## HP/PV

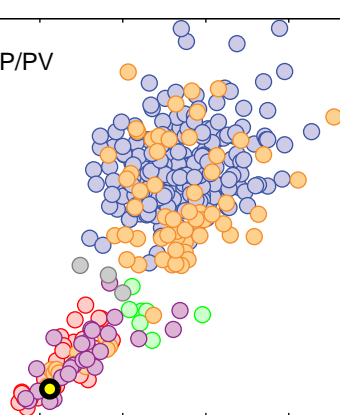

## FR/PV

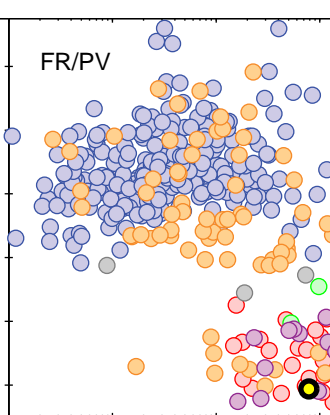

## ISI Histogram [1375]

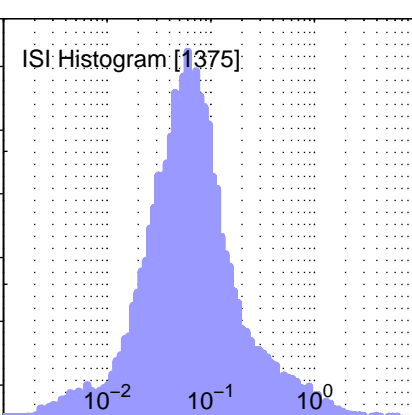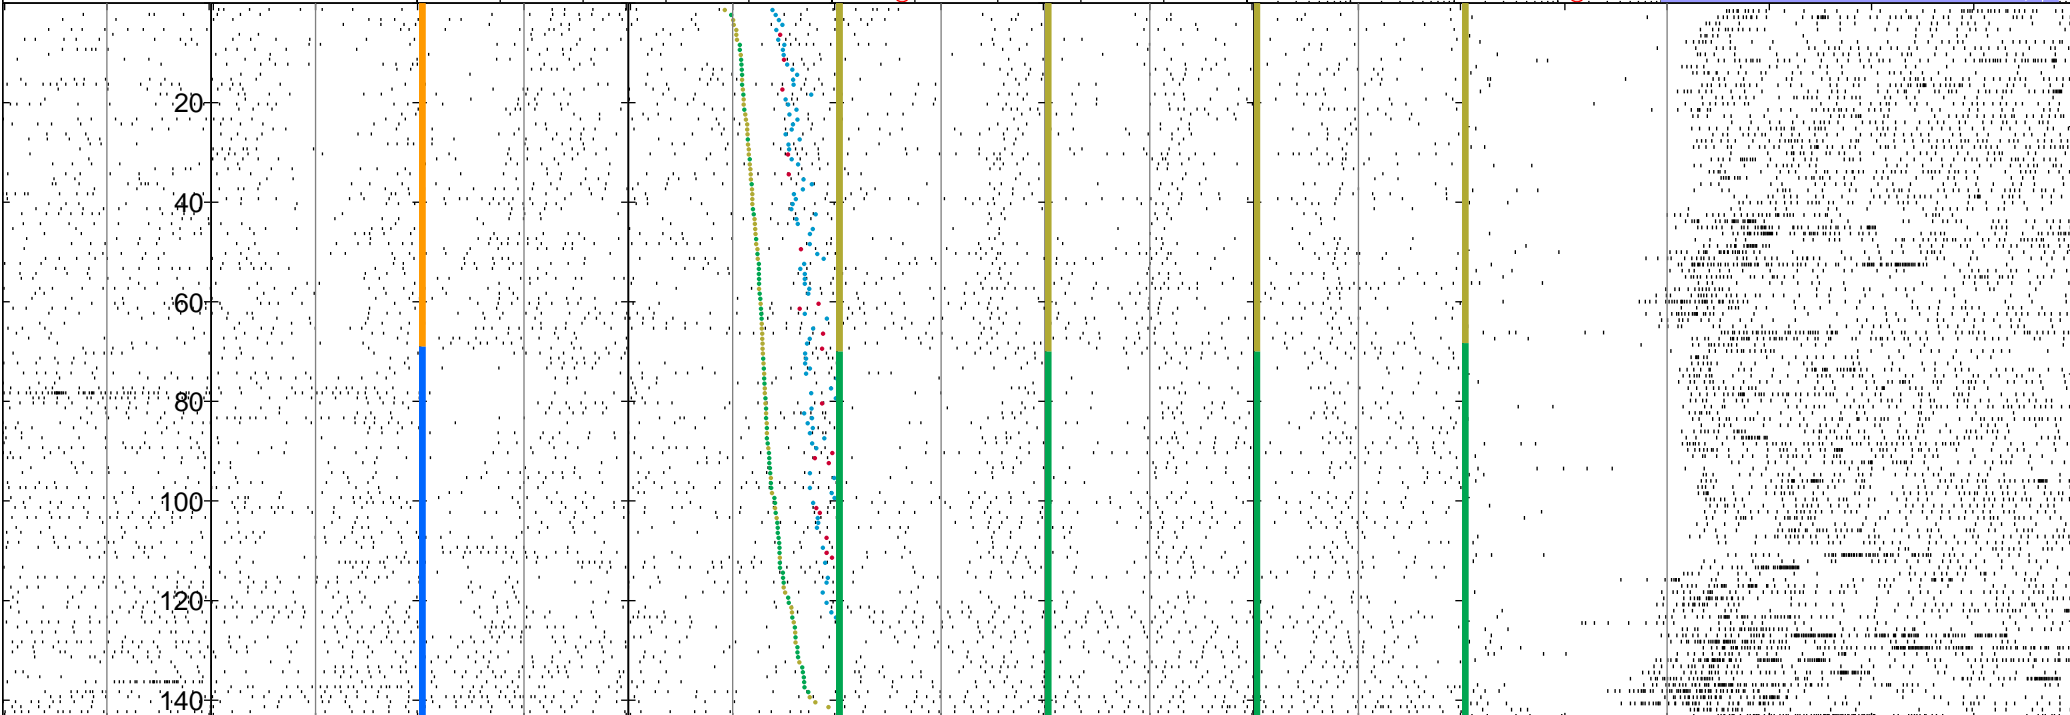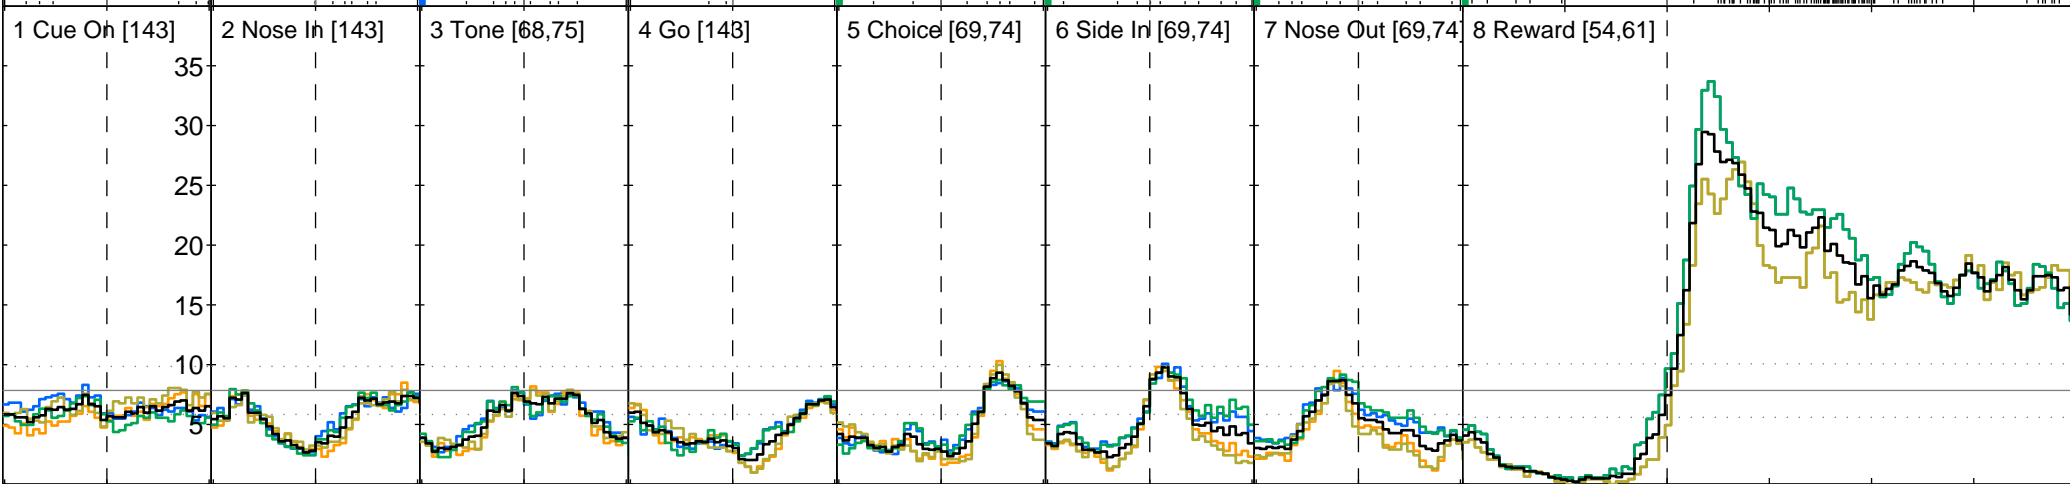

**Cell: C0520070417T05b**

AP: 2.2 ML: 1.2 DV: 8.2

w: 3 n: 24395  $P_{ISI>2}$ : 01/2pw: 160 $\mu$ s p $\rightarrow$ v: 310 $\mu$ s $\beta_T$ : 2.5  $\beta_D$ : -2.6 $\beta_P$ : 3.4 SI: 0.27

Session FR: 7.48 Hz

Pk Ev: 8 - Reward (T2/Ipsi)

Pk FR: 16.4Hz (0.29s) **FSI**

Waveform

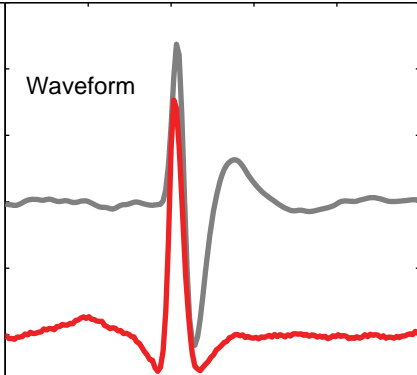

HP/PV

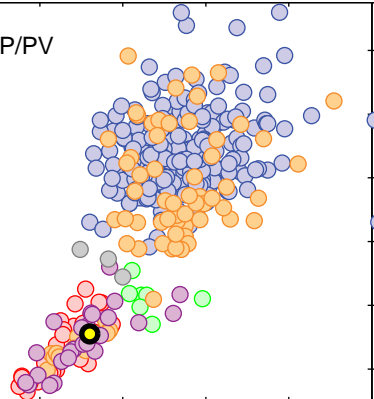

FR/PV

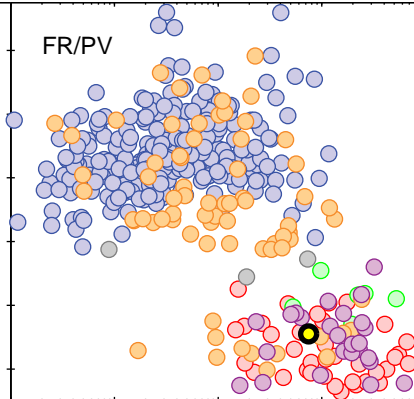

ISI Histogram [835]

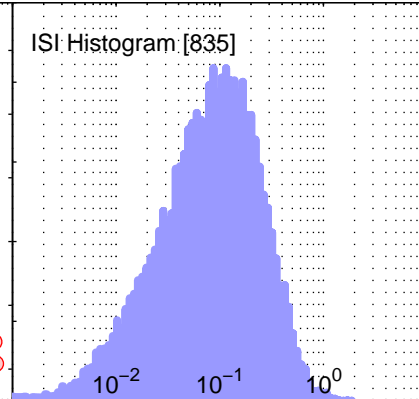10  
20  
30  
40  
50  
60  
70  
80  
90  
100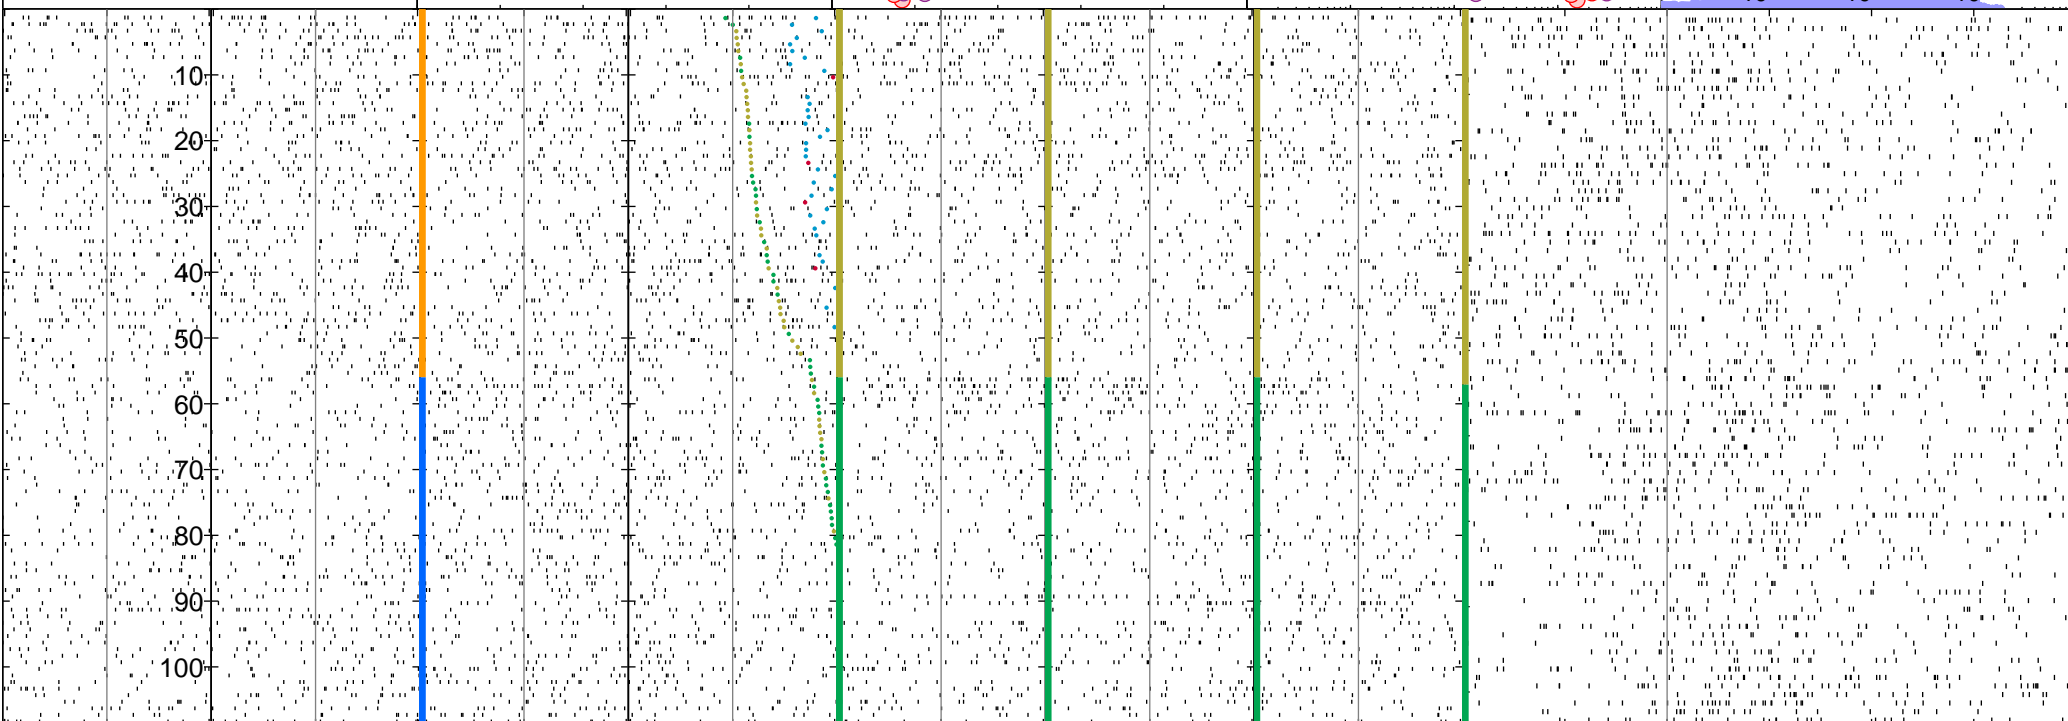

1 Cue On [108]

2 Nose In [108]

3 Tone [55,53]

4 Go [108]

5 Choice [55,53]

6 Side In [55,53]

7 Nose Out [55,53]

8 Reward [43,40]

15  
10  
5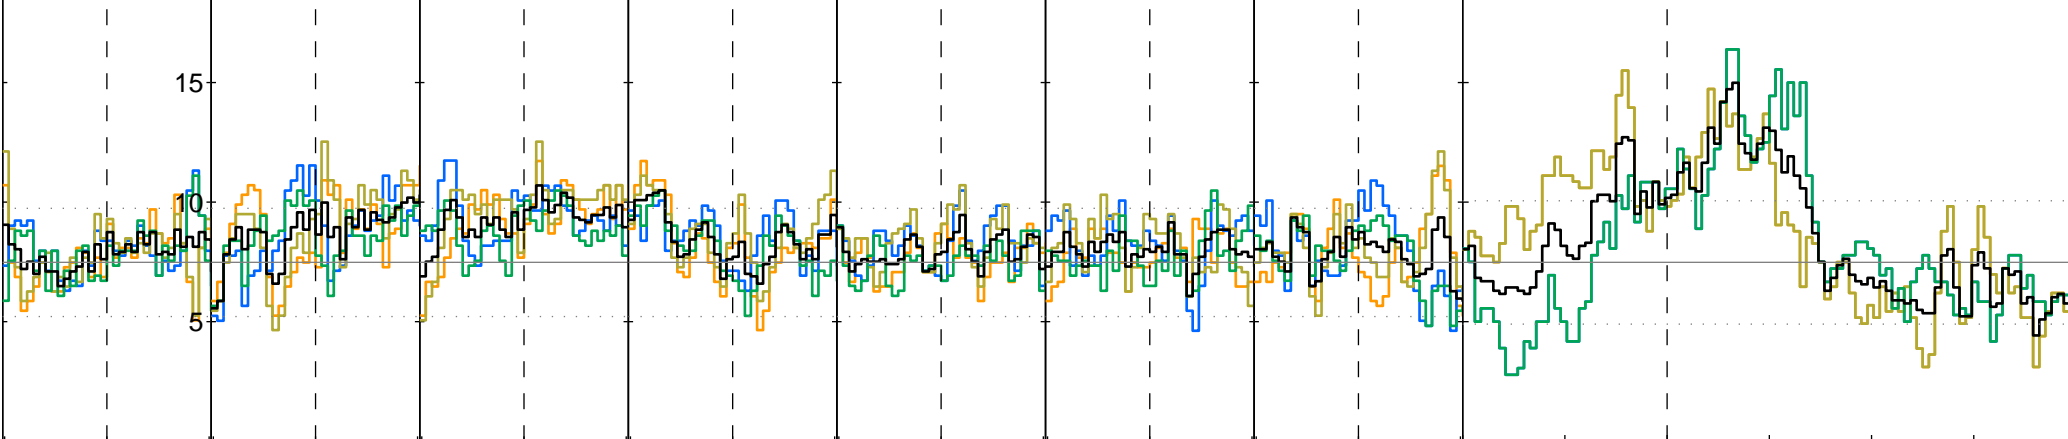

Cell: C0320070619T07f

AP: 0.96 ML: 3.6 DV: 5.8

w: 3 n: 7693  $P_{ISI>2}$ : 0.47

1/2pw: 106 $\mu$ s p->v: 219 $\mu$ s

$\beta_T$ : -2.3  $\beta_D$ : 2.9

$\beta_P$ : 2 SI: 0.44

Session FR: 1.81 Hz

Pk Ev: 8 - Reward (T1/Con)

Pk FR: 17.6Hz (0.35s) **FSI**

Waveform

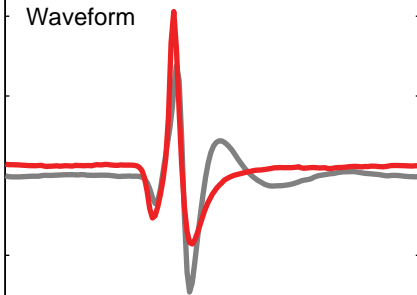

HP/PV

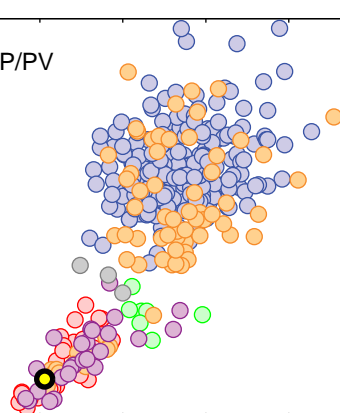

FR/PV

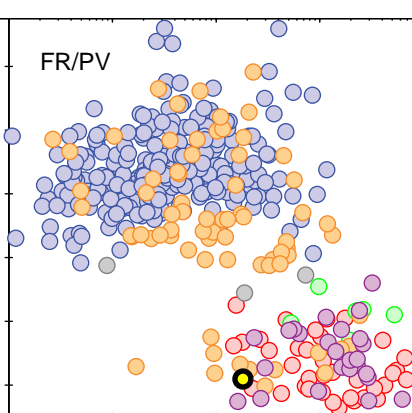

ISI Histogram [253]

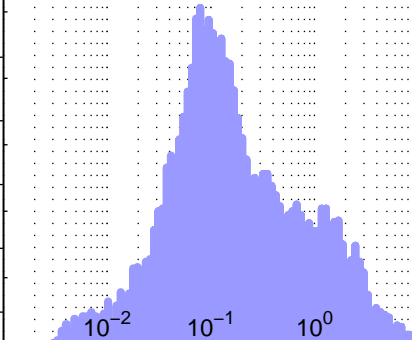

10  
20  
30  
40  
50  
60  
70  
80  
90

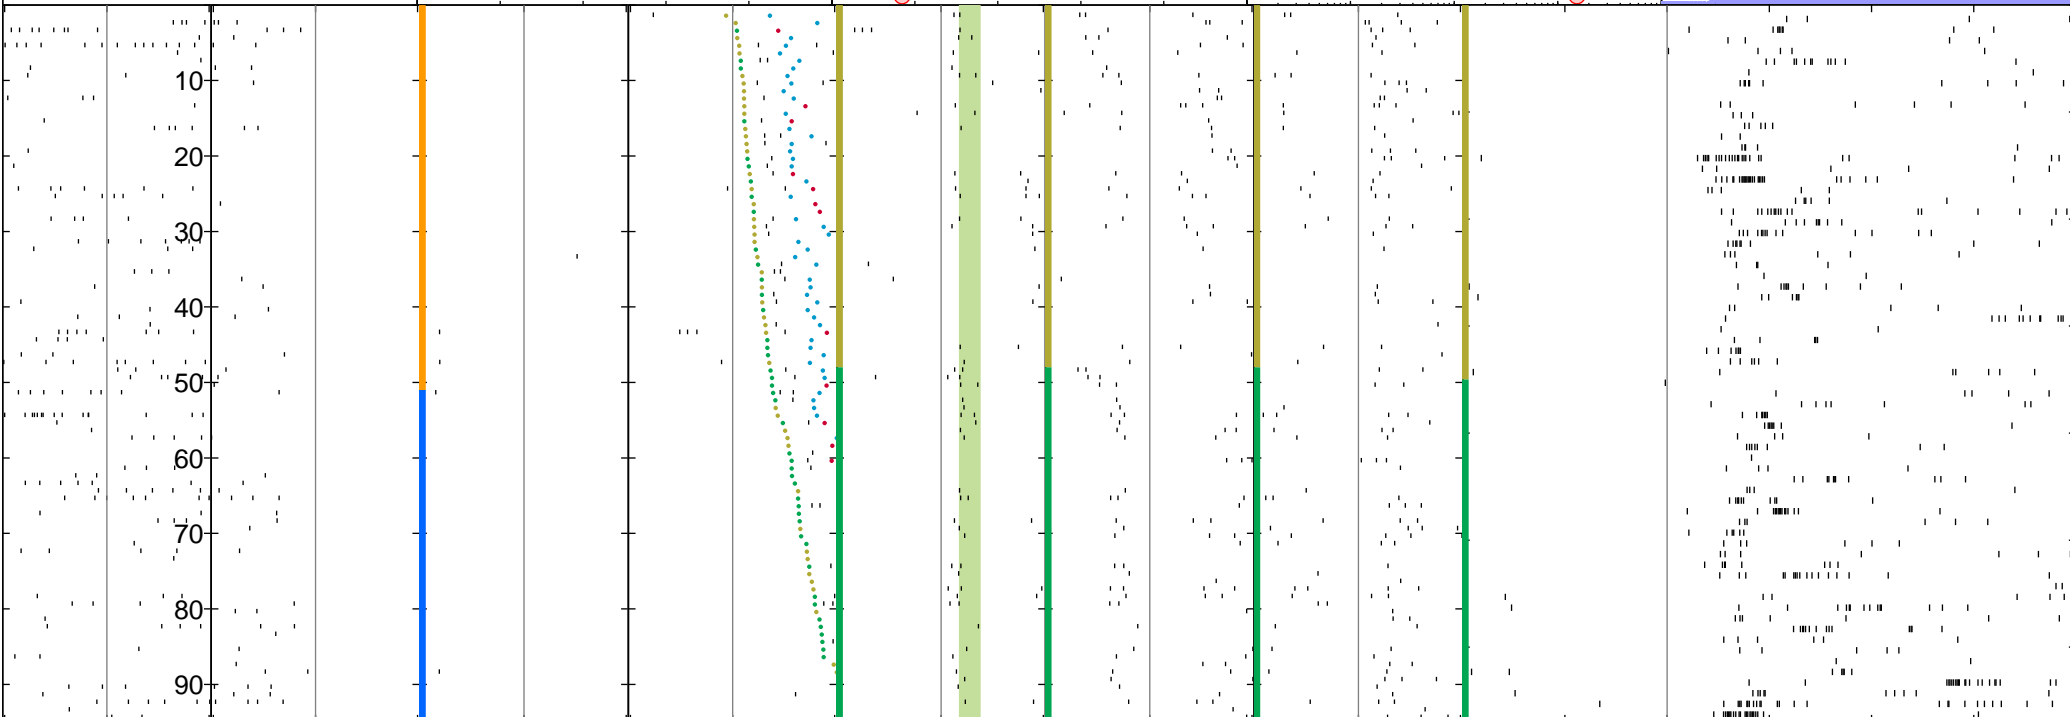

1 Cue On [94]

2 Nose In [94]

3 Tone [50,44]

4 Go [94]

5 Choice [47,47]

6 Side In [47,47]

7 Nose Out [47,47]

8 Reward [34,32]

15  
10  
5

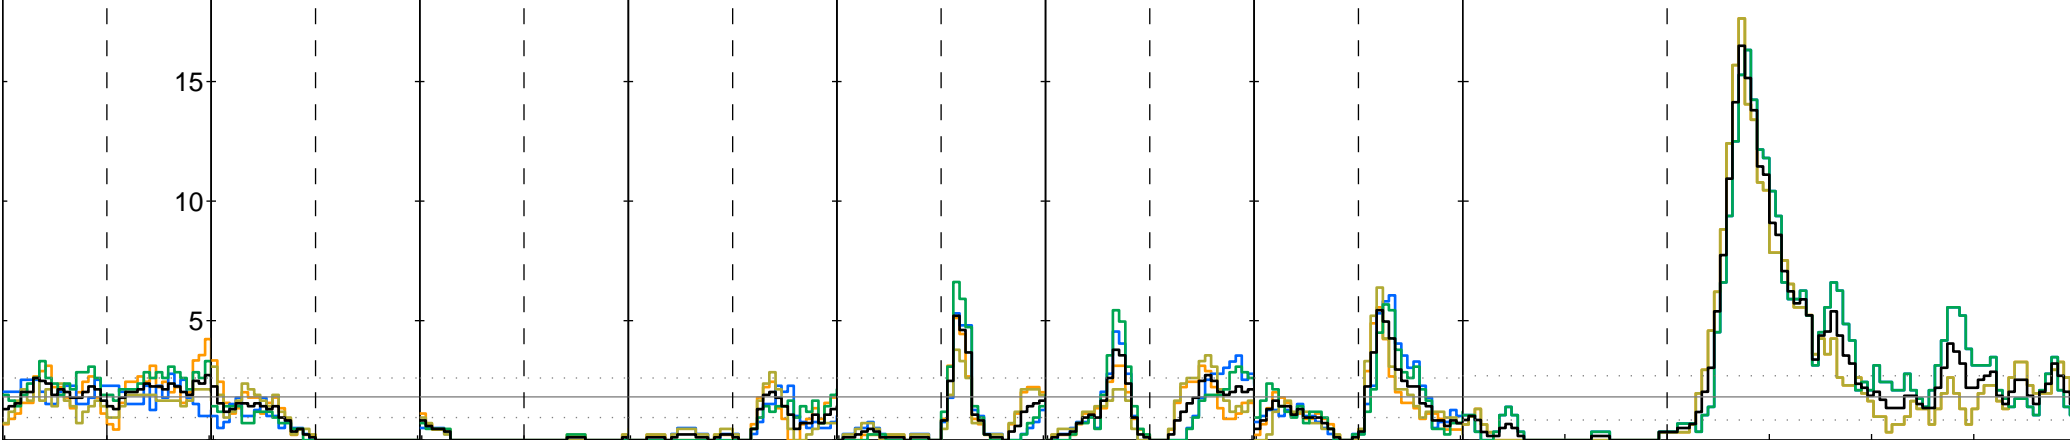



Cell: C0320070626T09a

AP: 1.6 ML: 3.7 DV: 5.6

w: 1 n: 65947  $P_{ISI>2}$ : 0

1/2pw: 171 $\mu$ s p->v: 410 $\mu$ s

$\beta_T$ : 2.3  $\beta_D$ : 3.6

$\beta_P$ : -3.9 SI: 0.22

Session FR: 17.6 Hz

Pk Ev: 8 - Reward (T1/Con)

Pk FR: 29.5Hz (0.41s) **FSI**

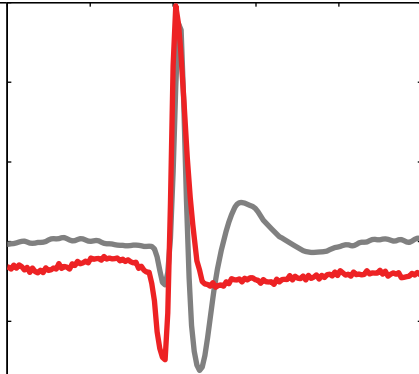

HP/PV

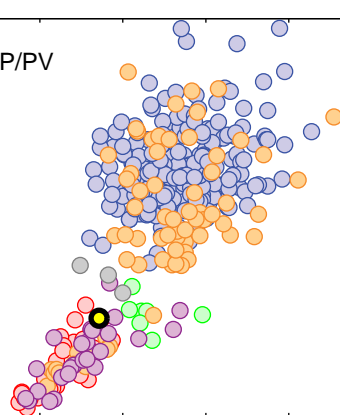

FR/PV

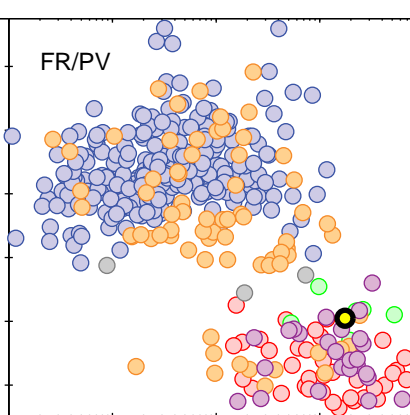

ISI Histogram [3732]

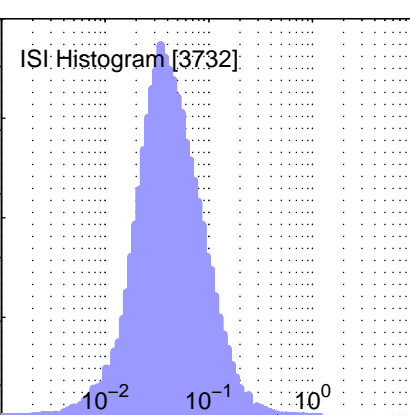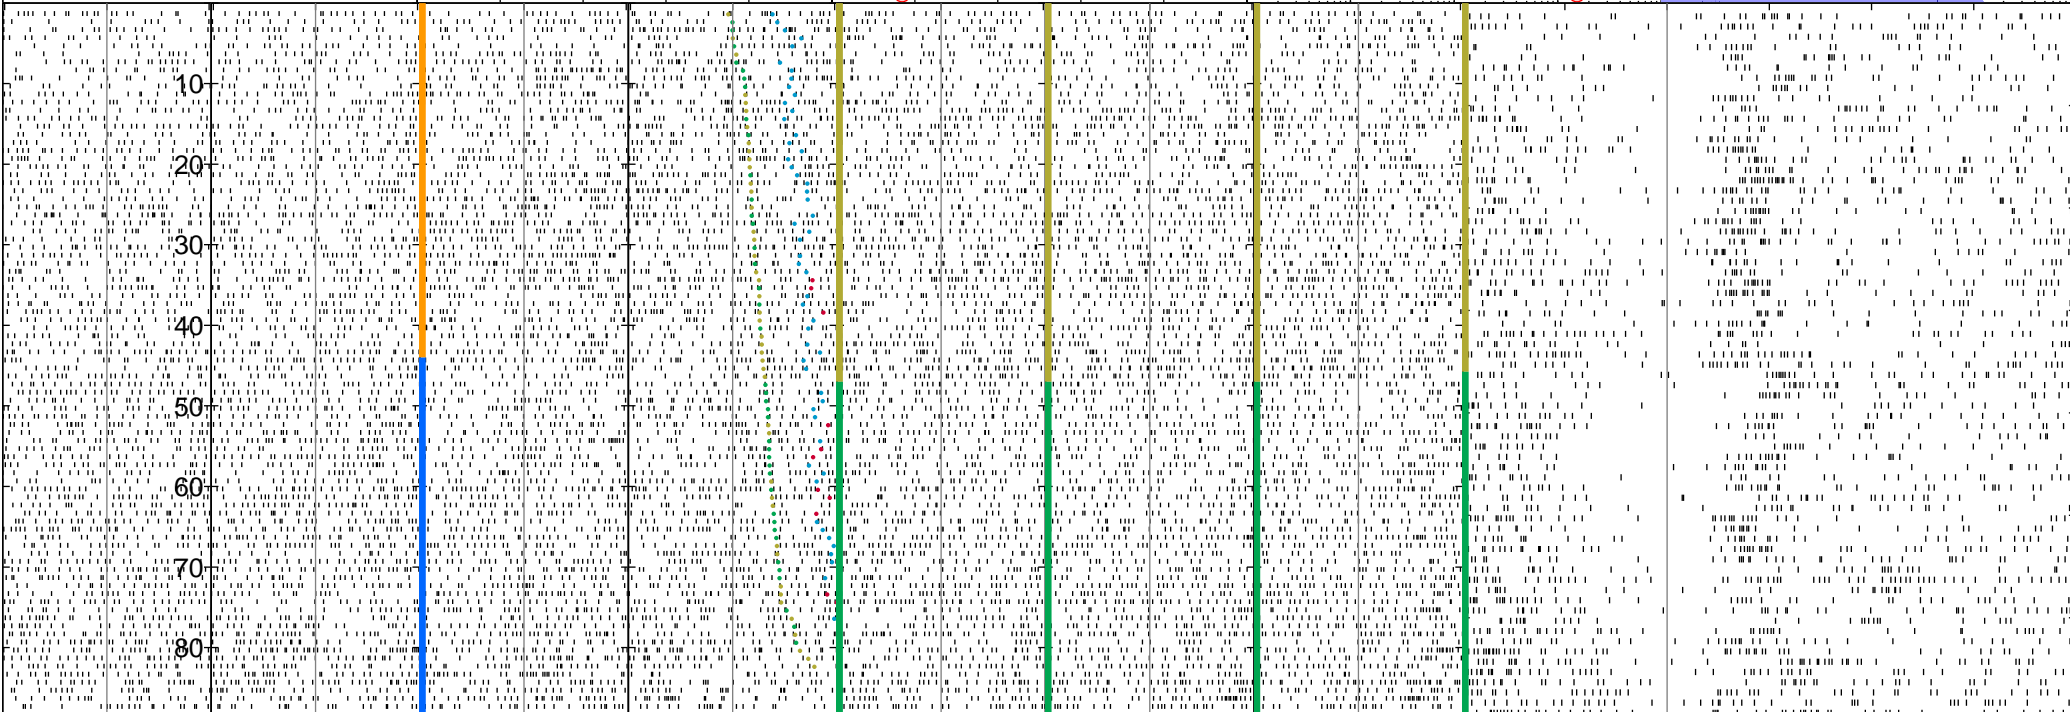

1 Cue On [88]

2 Nose In [88]

3 Tone [43,45]

4 Go [88]

5 Choice [46,42]

6 Side In [46,42]

7 Nose Out [46,42]

8 Reward [35,34]

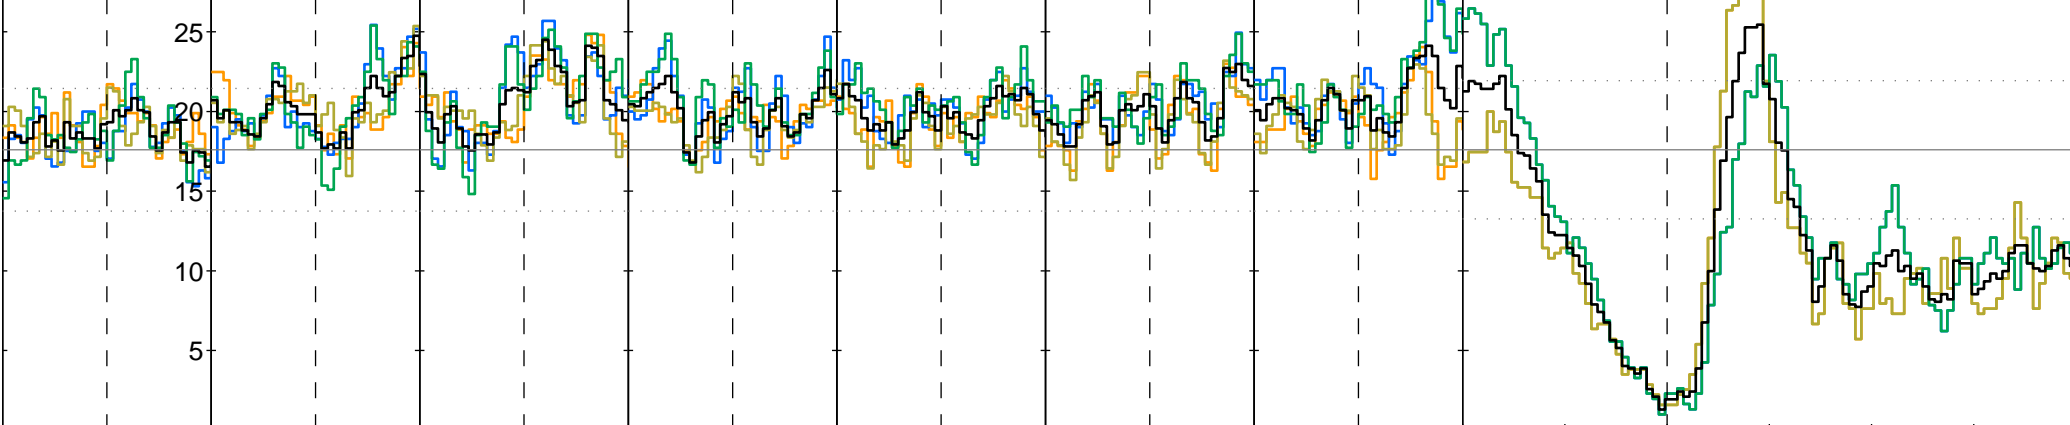

Cell: C1220071025T11b

AP: -2.8 ML: 4.2 DV: 6.8

w: 4 n: 462037  $P_{ISI>2}$ : 0

1/2pw: 158 $\mu$ s p->v: 218 $\mu$ s

$\beta_T$ : -2.6  $\beta_D$ : -9.7

$\beta_P$ : 2.9 SI: -0.11

Session FR: 68.4 Hz

Pk Ev: 8 - Reward (T2/Ipsi)

Pk FR: 154Hz (0.41s) **FSI**

Waveform

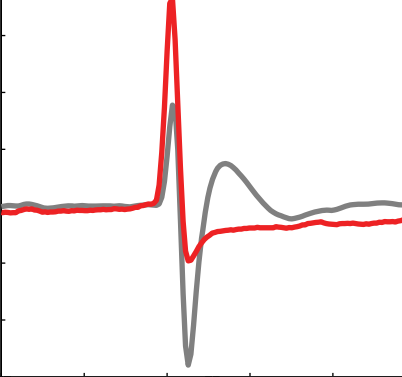

HP/PV

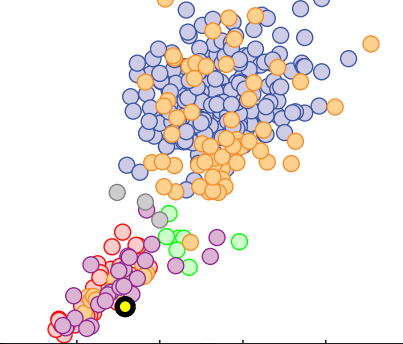

FR/PV

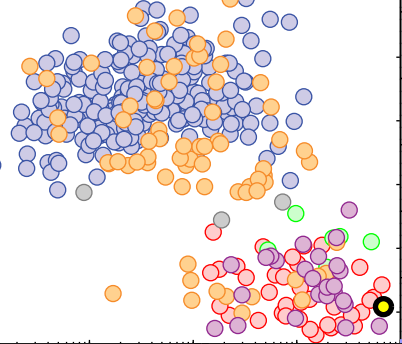

ISI Histogram [50419]

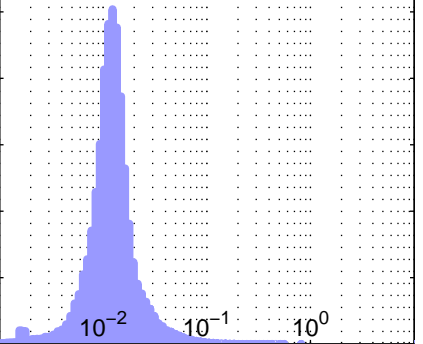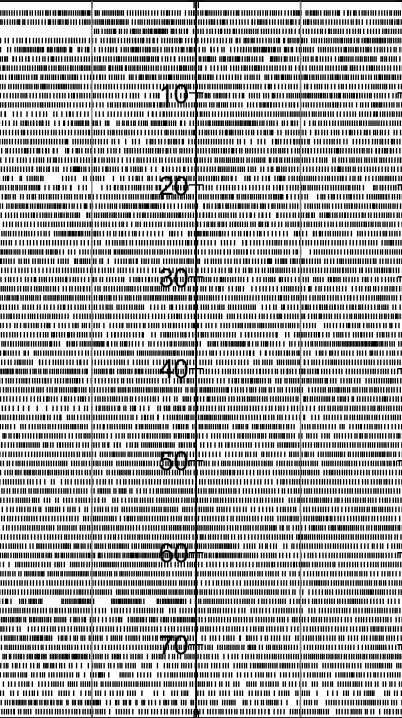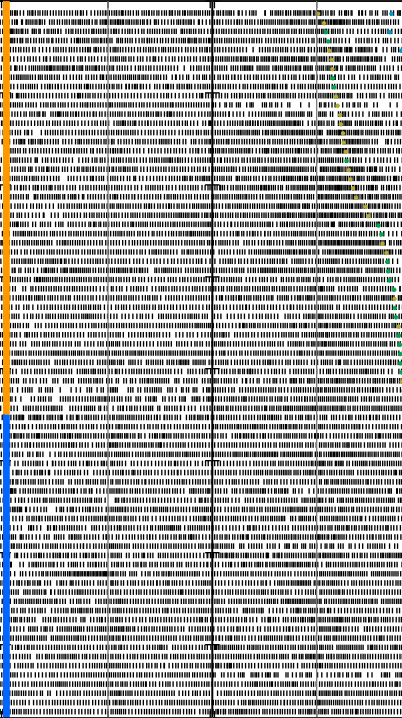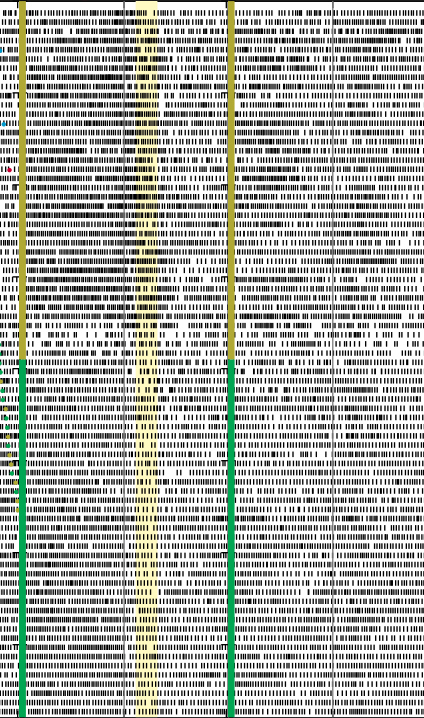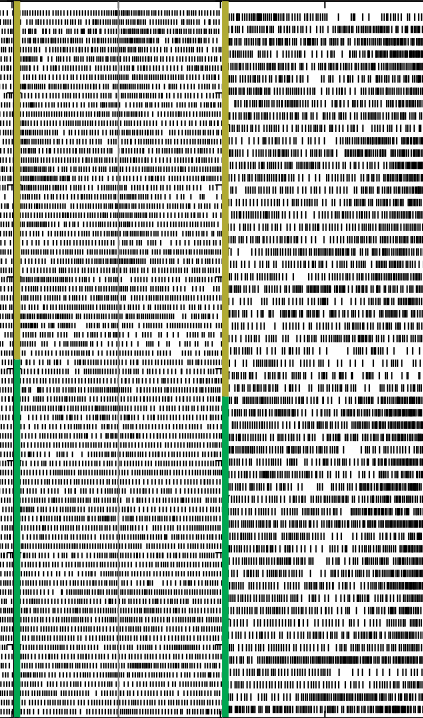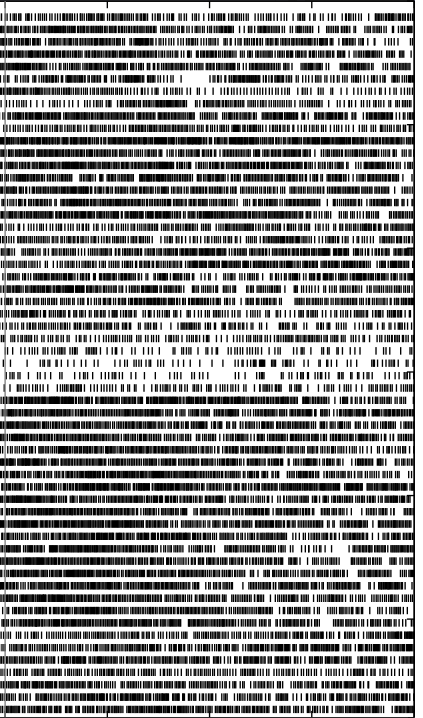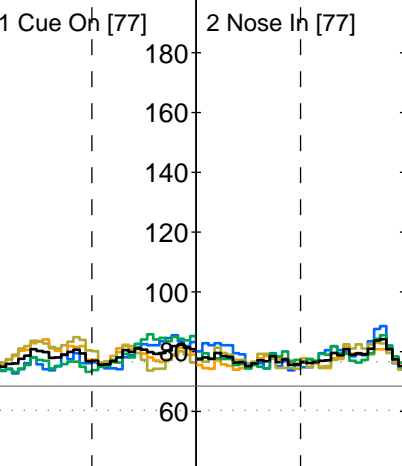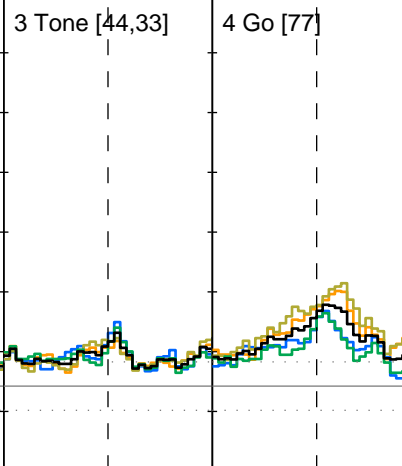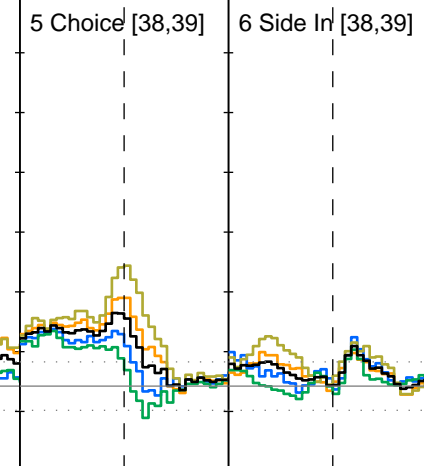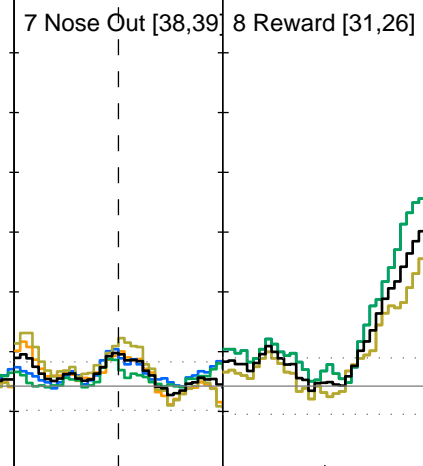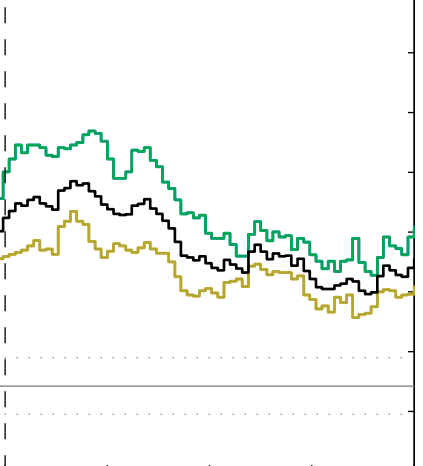

Cell: C0320070704T11b

AP: -0.96 ML: 3.7 DV: 7.9

w: 4 n: 131971  $P_{ISI>2}$ : 0

1/2pw: 187 $\mu$ s p->v: 341 $\mu$ s

$\beta_T$ : 3.6  $\beta_D$ : -8.6

$\beta_P$ : 2.2 SI: -0.28

Session FR: 40.6 Hz

Pk Ev: 8 - Reward (T1/Con)

Pk FR: 88.6Hz (0.62s) FSI

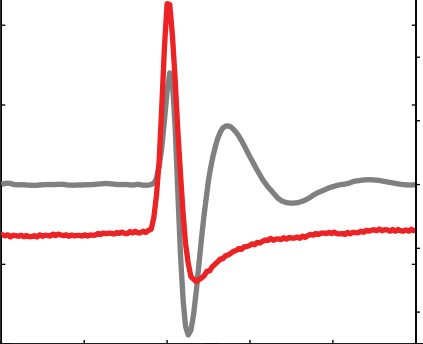

HP/PV

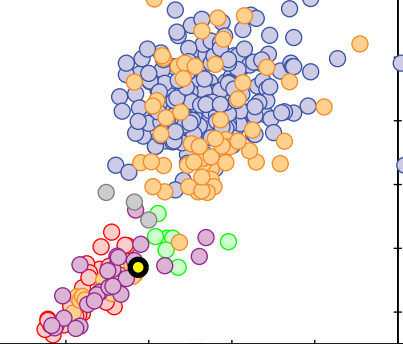

FR/PV

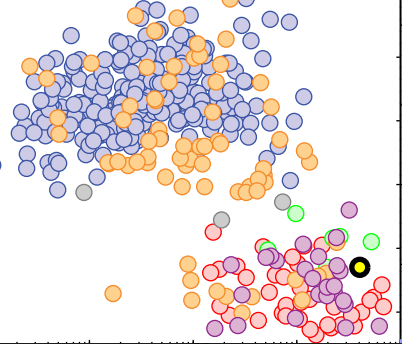

ISI Histogram [7069]

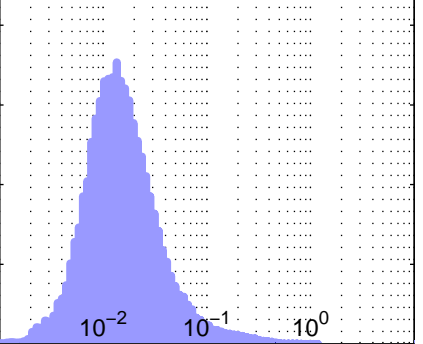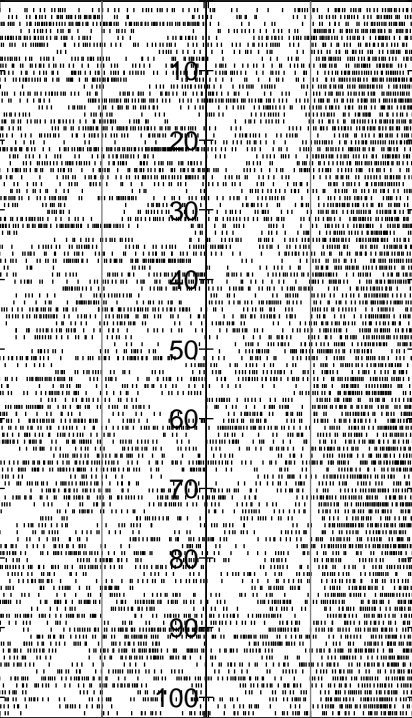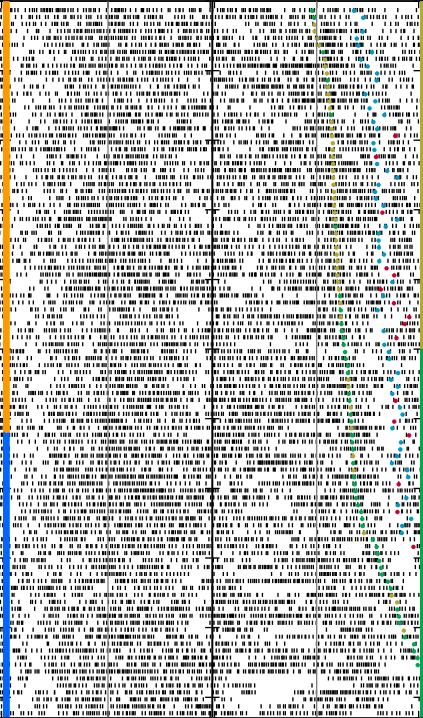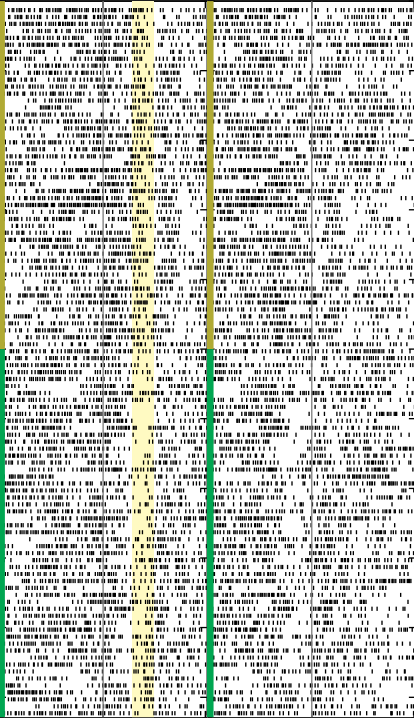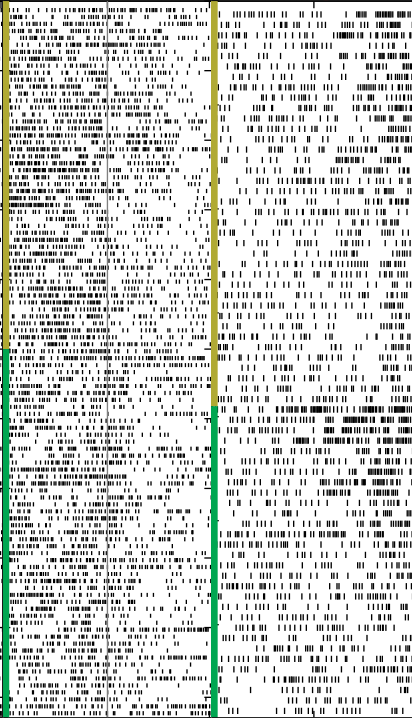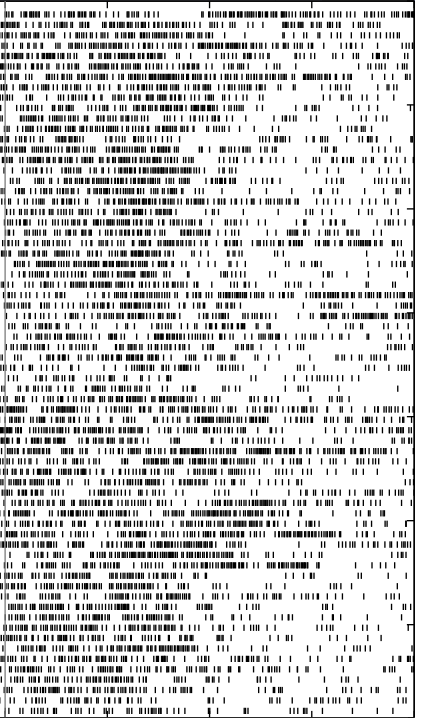

1 Cue On [102]

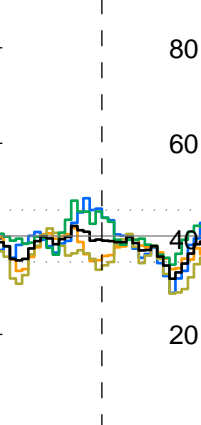

2 Nose In [102]

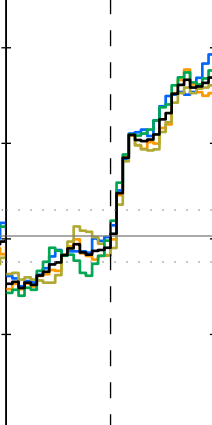

3 Tone [61,41]

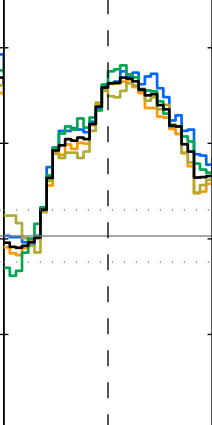

4 Go [102]

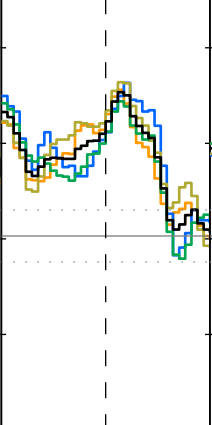

5 Choice [49,53]

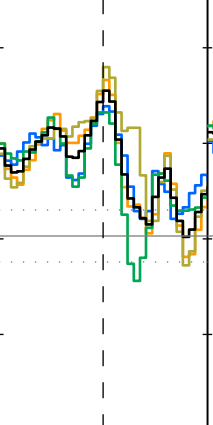

6 Side In [49,53]

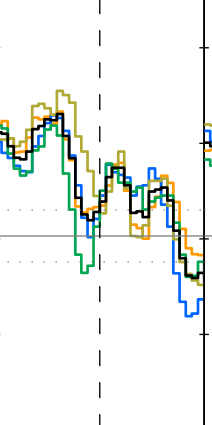

7 Nose Out [49,53]

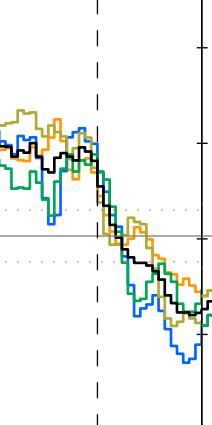

8 Reward [38,30]

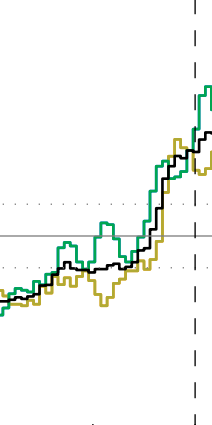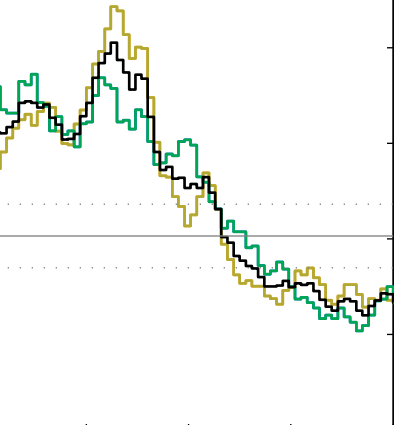

Cell: C0520070406T07a

AP: 1.3 ML: 3.4 DV: 3.8

w: 2 n: 36689  $P_{ISI>2}$ : 0.11

1/2pw: 149 $\mu$ s p->v: 230 $\mu$ s

$\beta_T$ : -1.8  $\beta_D$ : -5.6

$\beta_P$ : 4.8 SI: -0.46

Session FR: 11 Hz

Pk Ev: 8 - Reward (T1/Con)

Pk FR: 51.7Hz (0.62s) **FSI**

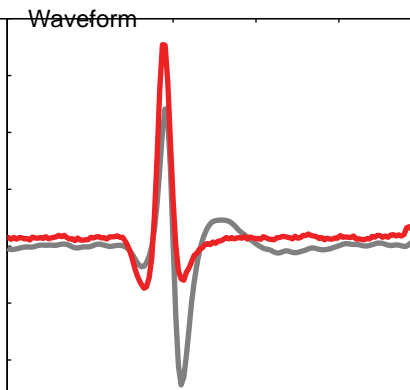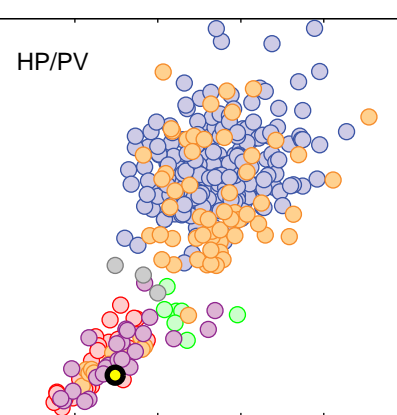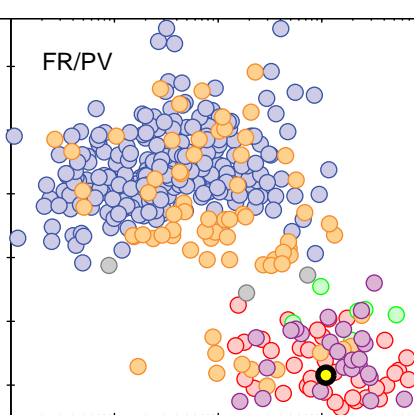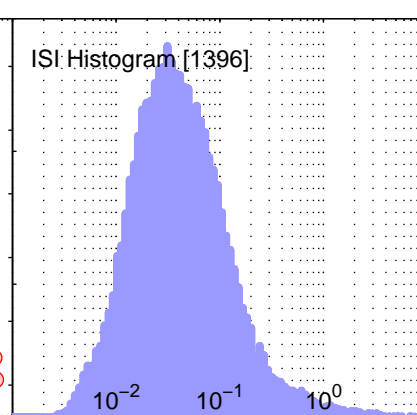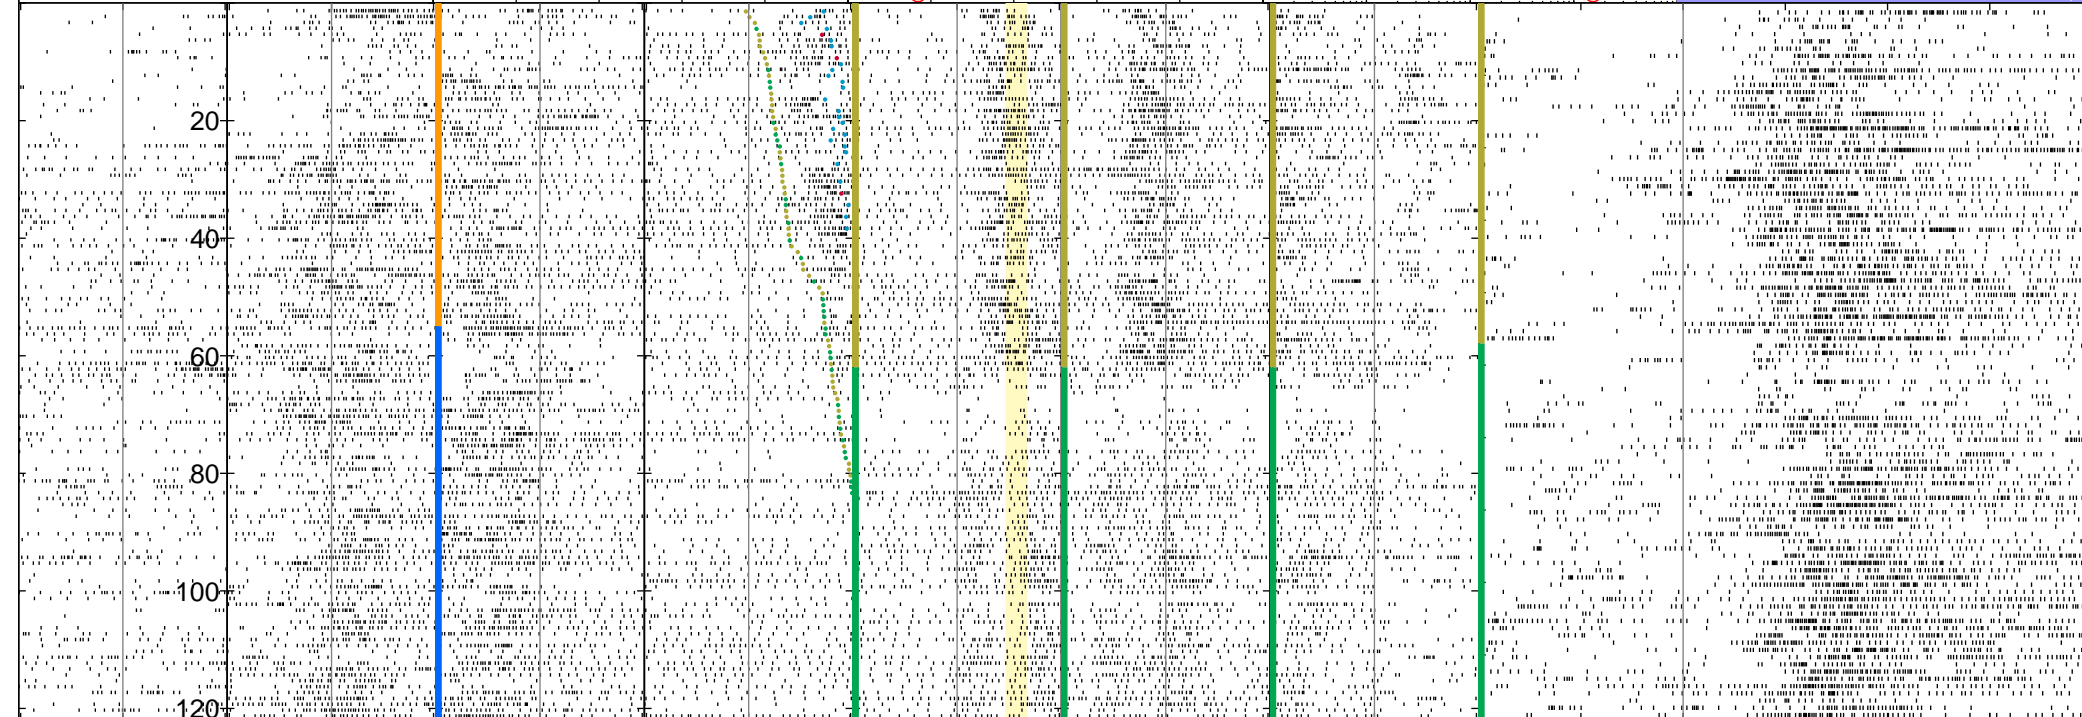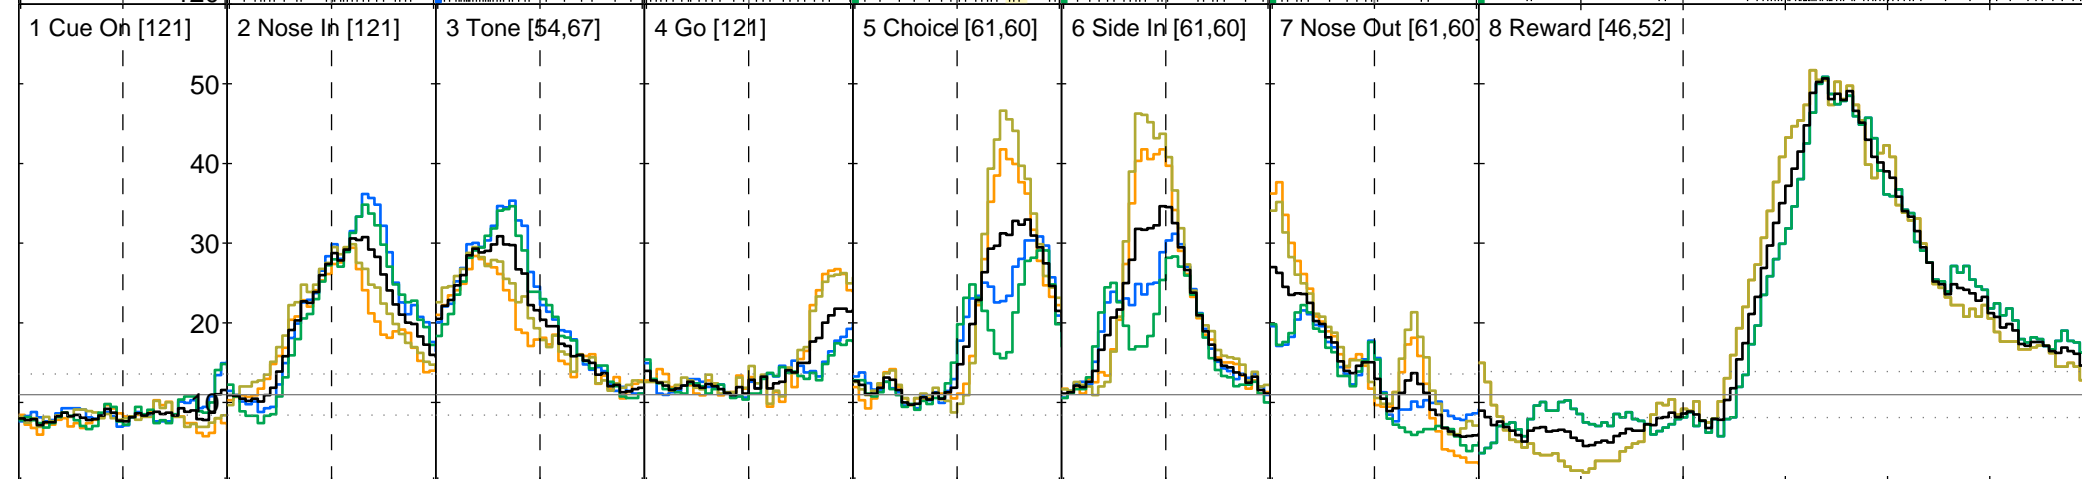

Cell: C0320070611T09d

AP: 1.6 ML: 3.7 DV: 4.7

w: 2 n: 15569  $P_{ISI>2}$ : 0.55

1/2pw: 304 $\mu$ s p->v: 829 $\mu$ s

$\beta_T$ : NaN  $\beta_D$ : NaN

$\beta_P$ : NaN SI: NaN

Session FR: 2.08 Hz

Pk Ev: 1 - Cue on (Tone1)

Pk FR: 7.11Hz (-0.83s) **MSN**

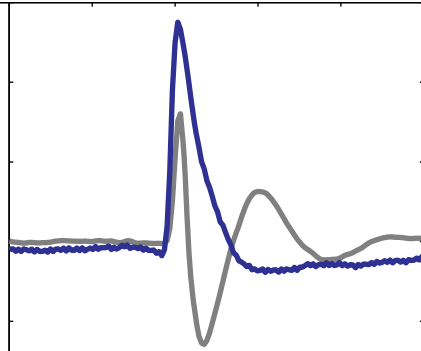

HP/PV

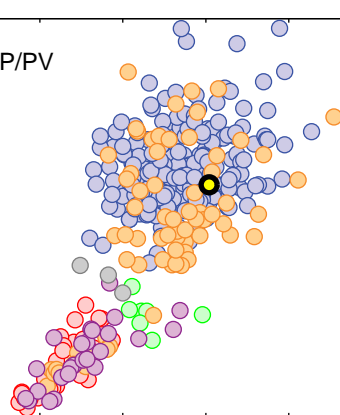

FR/PV

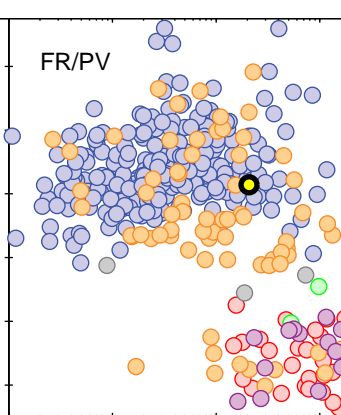

ISI Histogram [403]

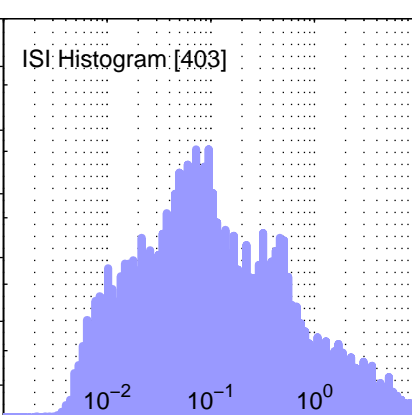

10  
20  
30  
40  
50  
60  
70  
80

1 Cue On [85] 2 Nose In [85] 3 Tone [50,35] 4 Go [85] 5 Choice [39,46] 6 Side In [39,46] 7 Nose Out [39,46] 8 Reward [33,29]

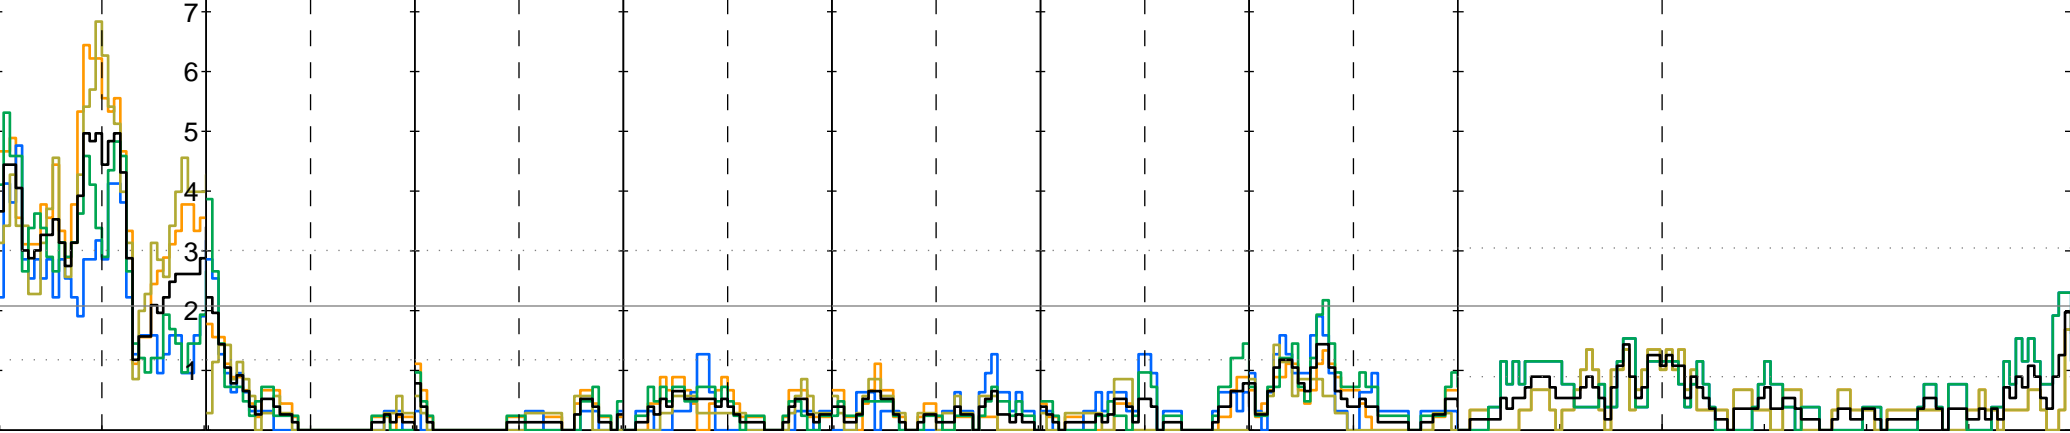



Cell: C0320070625T11c

AP: -0.96 ML: 3.7 DV: 6.2

w: 4 n: 6769  $P_{ISI>2}$ : 0.45

1/2pw: 254 $\mu$ s p $\rightarrow$ v: 840 $\mu$ s

$\beta_T$ : NaN  $\beta_D$ : NaN

$\beta_P$ : NaN SI: NaN

Session FR: 2.4 Hz

Pk Ev: 1 - Cue on (Tone2)

Pk FR: 6.67Hz (0.85s) MSN

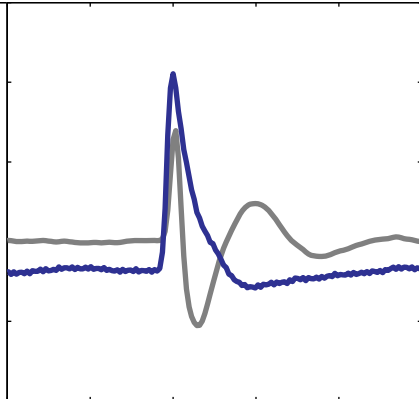

HP/PV

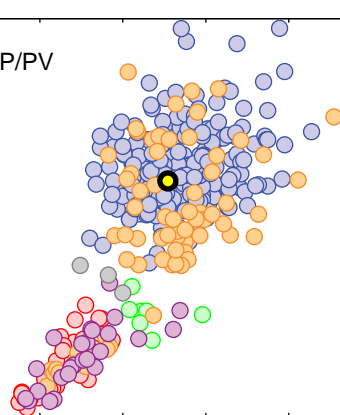

FR/PV

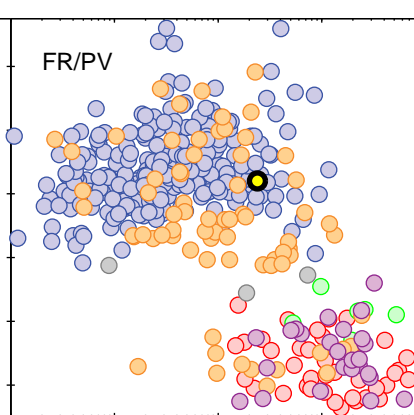

ISI Histogram [201]

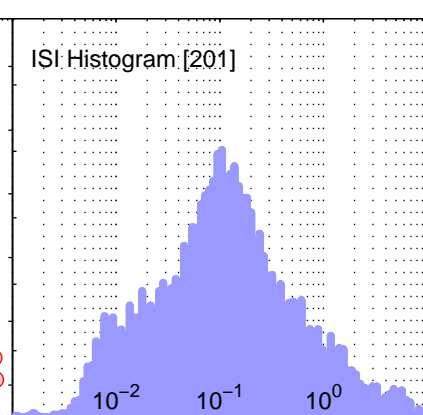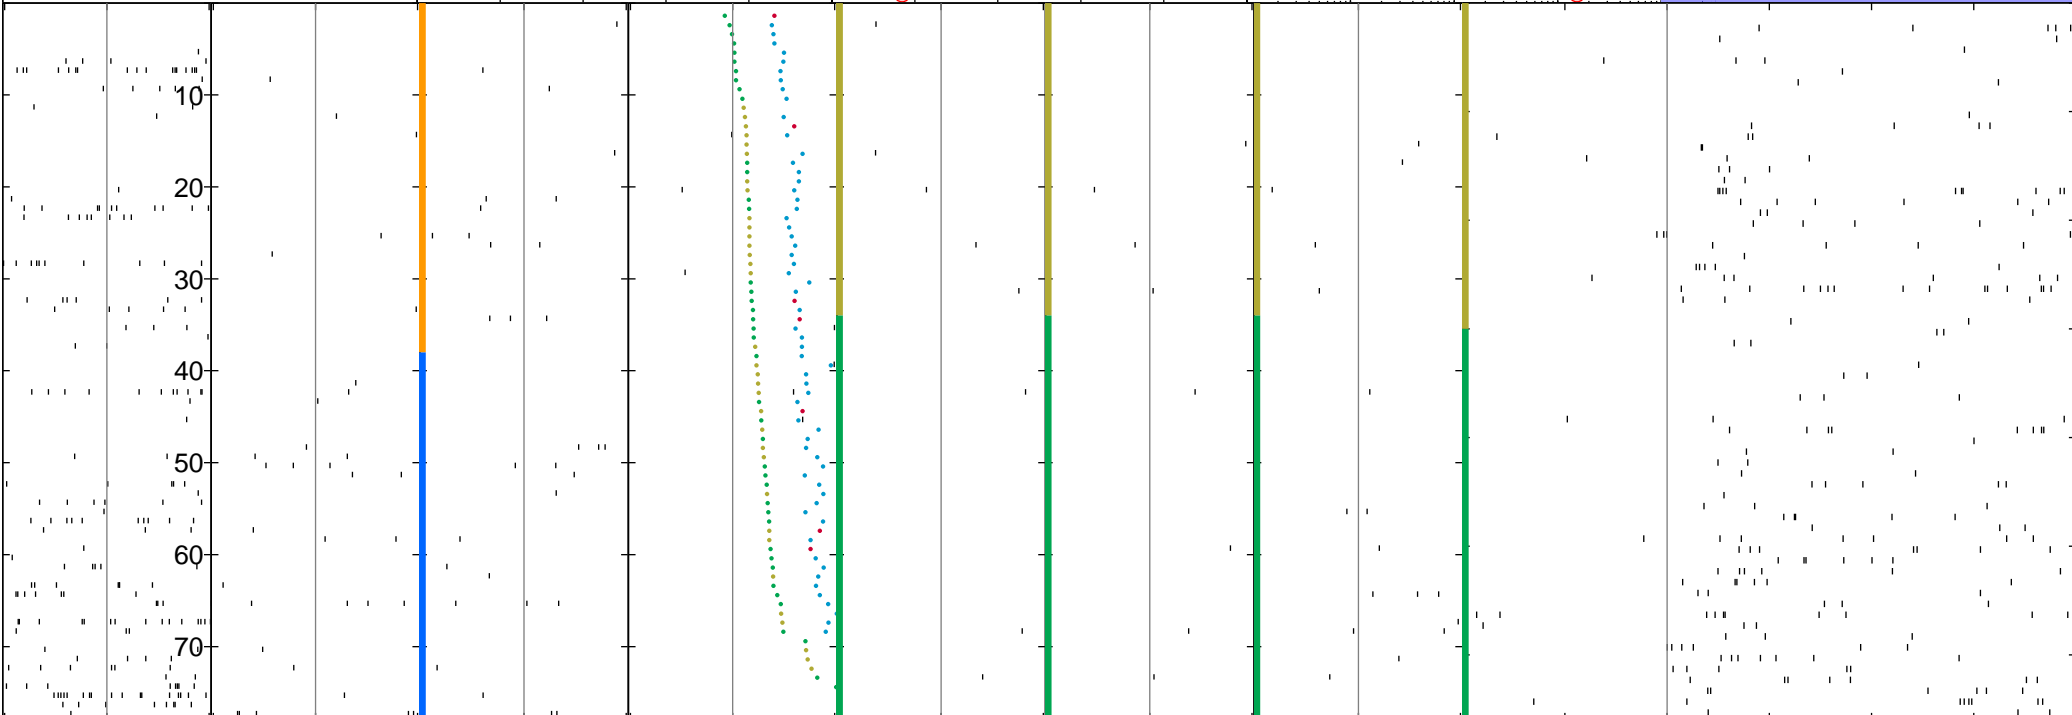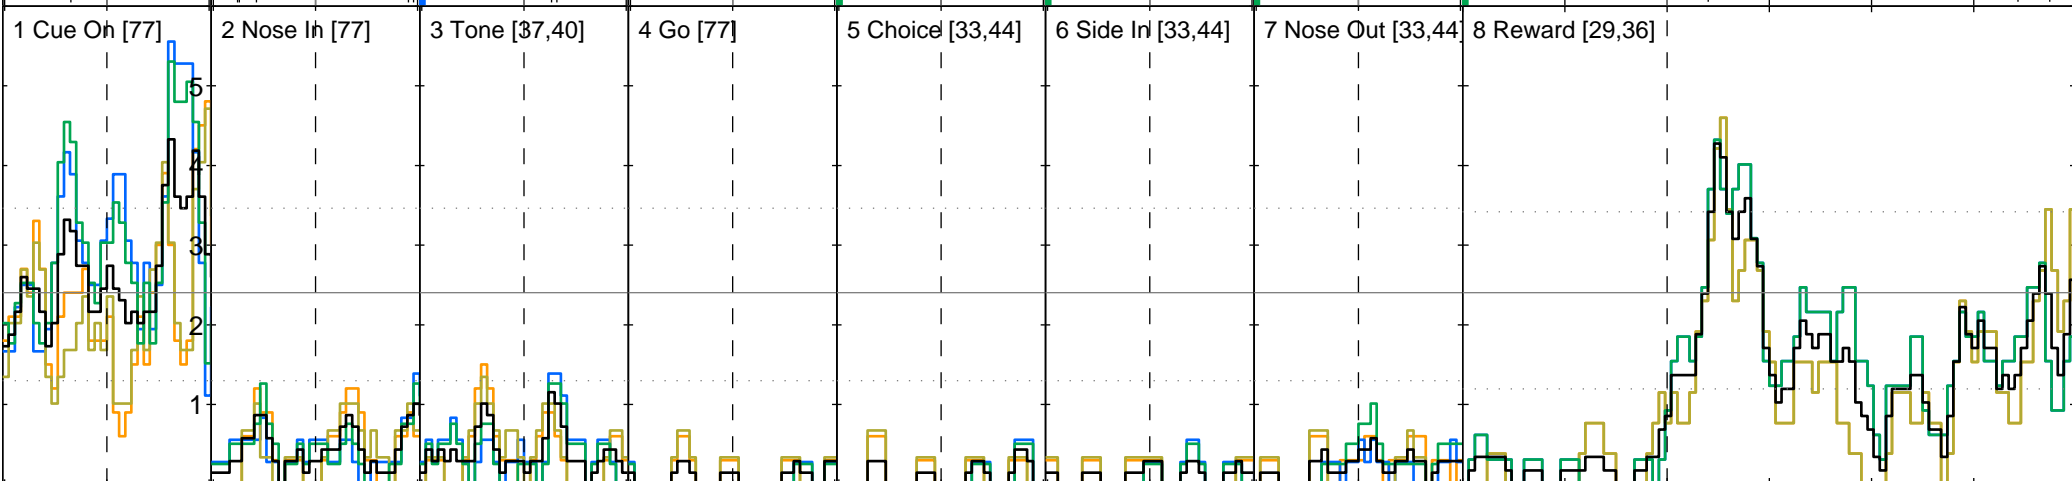

Cell: C1220071024T05e

AP: 1.4 ML: 2.1 DV: 6.9

w: 2 n: 23979  $P_{ISI>2}$ : 0.66

1/2pw: 395 $\mu$ s p $\rightarrow$ v: 1184 $\mu$ s

$\beta_T$ : -1.9  $\beta_D$ : 4.7

$\beta_P$ : 2.8 SI: 0.56

Session FR: 3.25 Hz

Pk Ev: 2 - Nose in (Tone1)

Pk FR: 13.9Hz (-1.5s) MSN

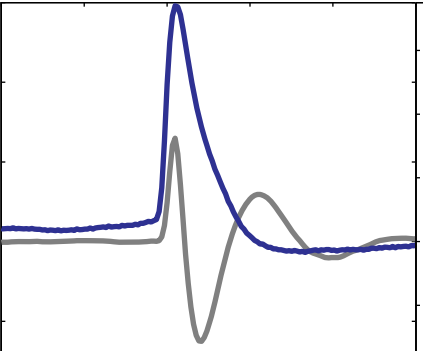

HP/PV

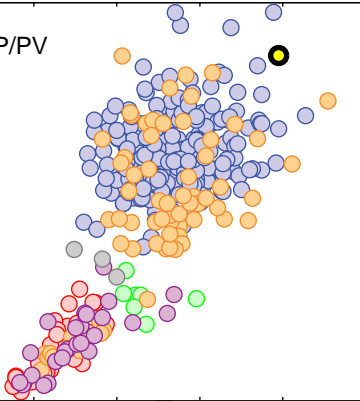

FR/PV

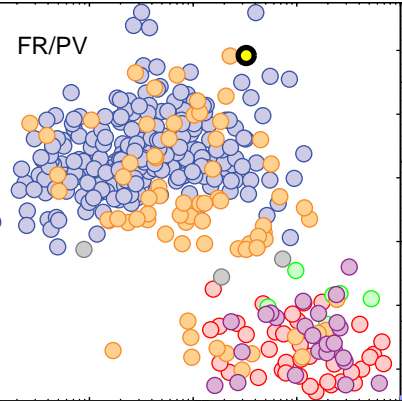

ISI Histogram [639]

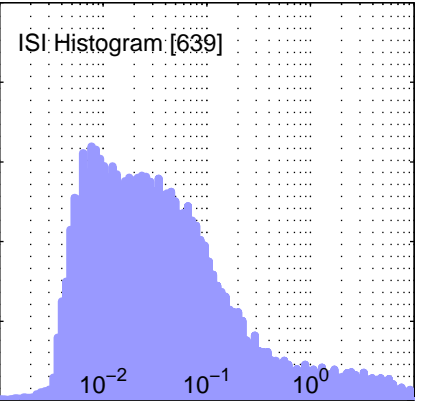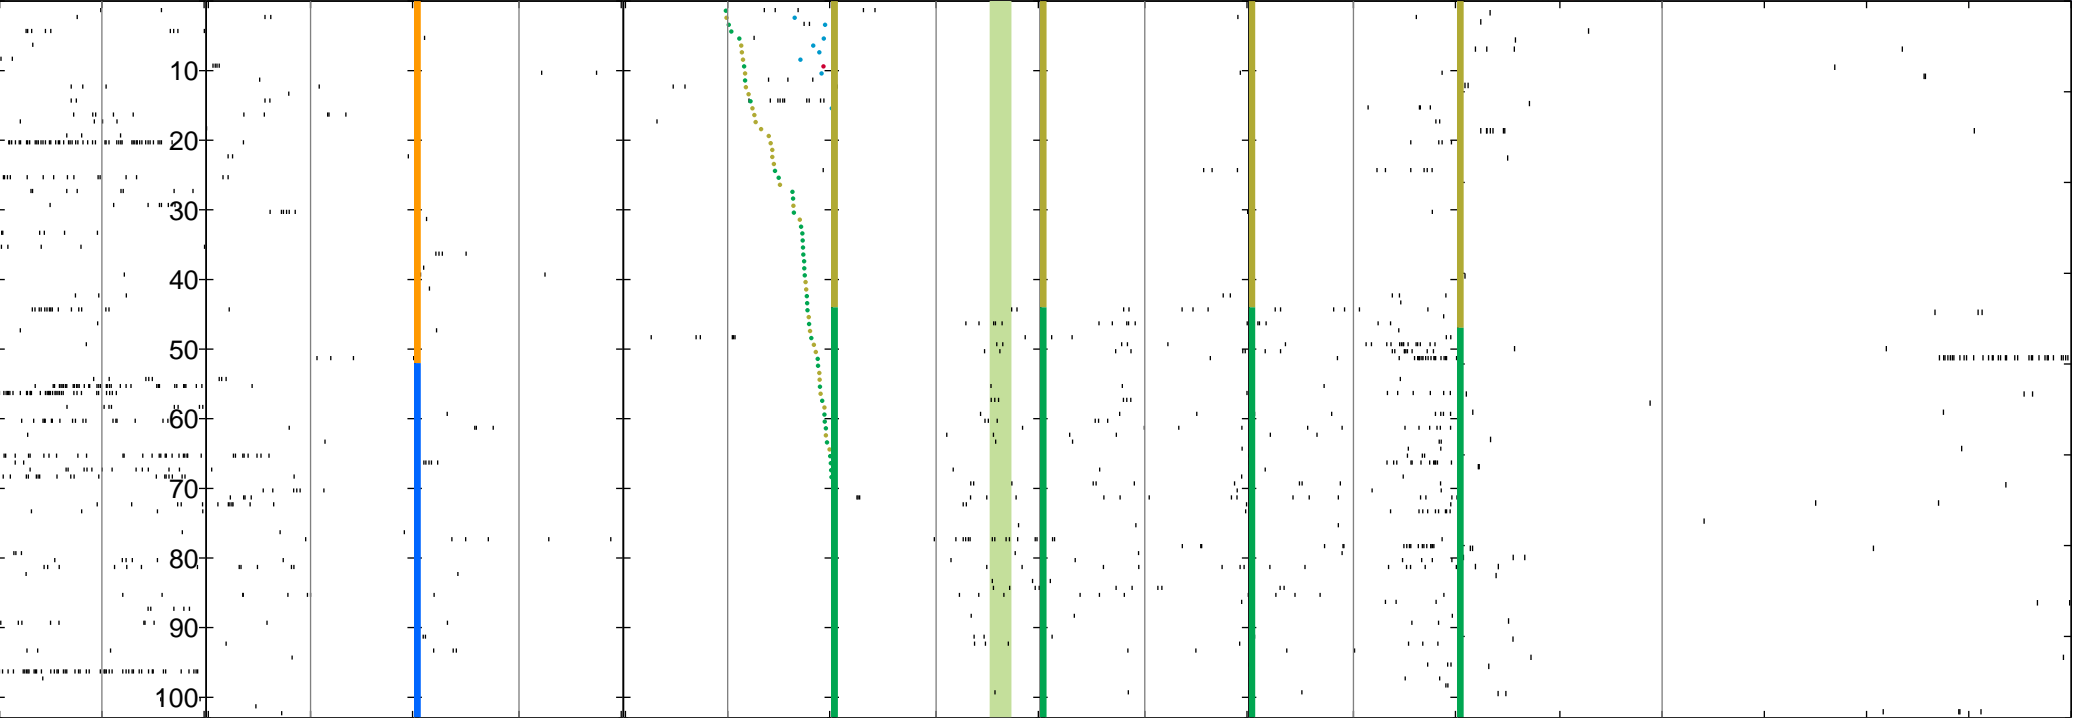

1 Cue On [102] 2 Nose In [102] 3 Tone [51,51] 4 Go [102] 5 Choice [43,59] 6 Side In [43,59] 7 Nose Out [43,59] 8 Reward [35,43]

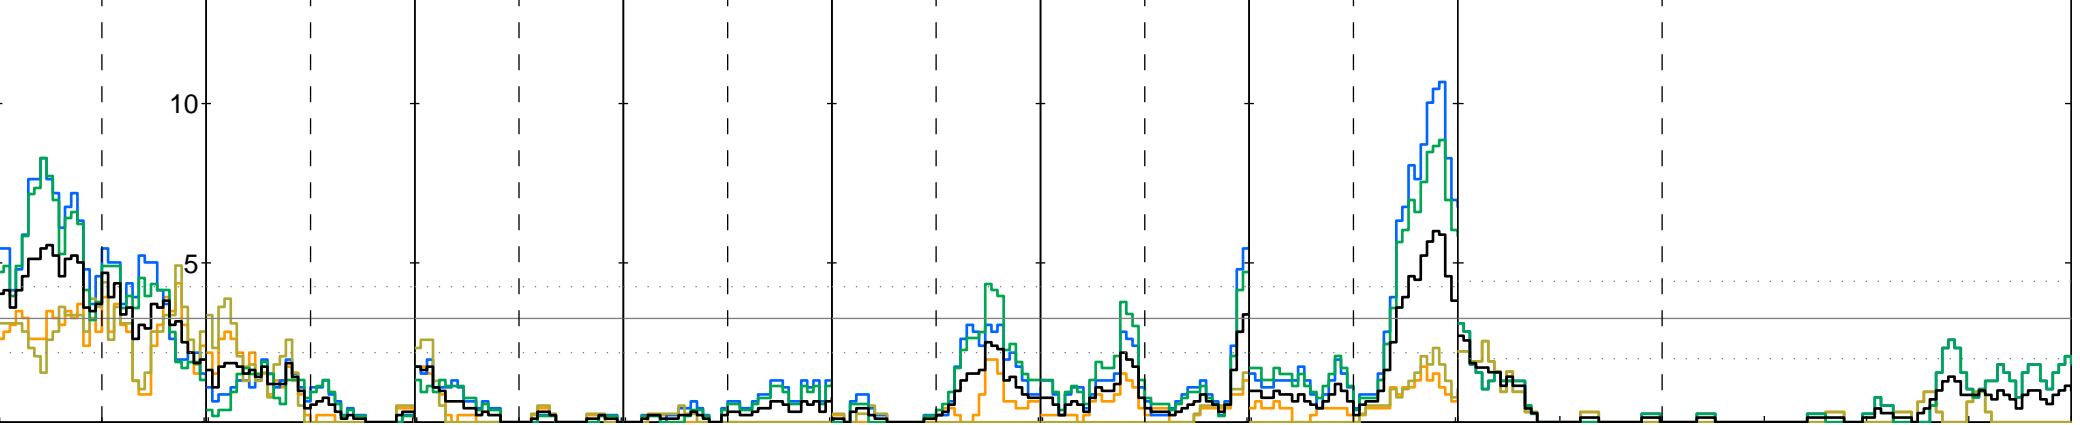

**Cell: C0420070312T05a**

AP: 2.5 ML: 1.3 DV: 6.5  
w: 4 n: 13067  $P_{ISI>2}$ : 0.54  
1/2pw: 251 $\mu$ s p->v: 1099 $\mu$ s  
 $\beta_T$ : NaN  $\beta_D$ : NaN  
 $\beta_P$ : NaN SI: NaN  
Session FR: 2.94 Hz  
Pk Ev: 2 - Nose in (Contra)  
Pk FR: 7.41Hz (-1.26s) **MSN**

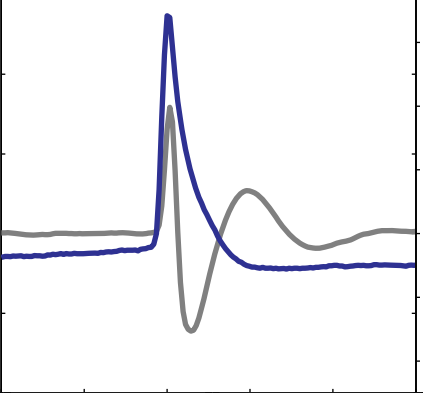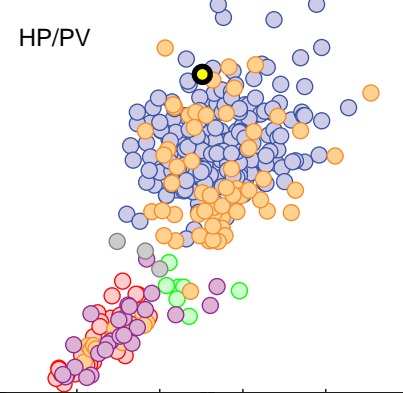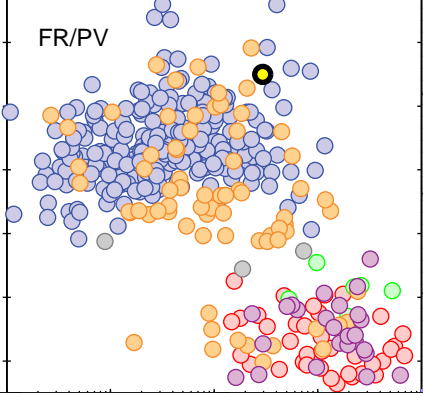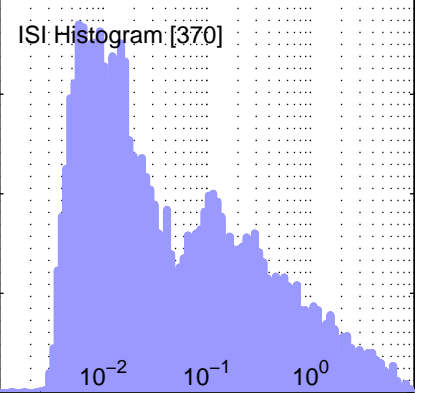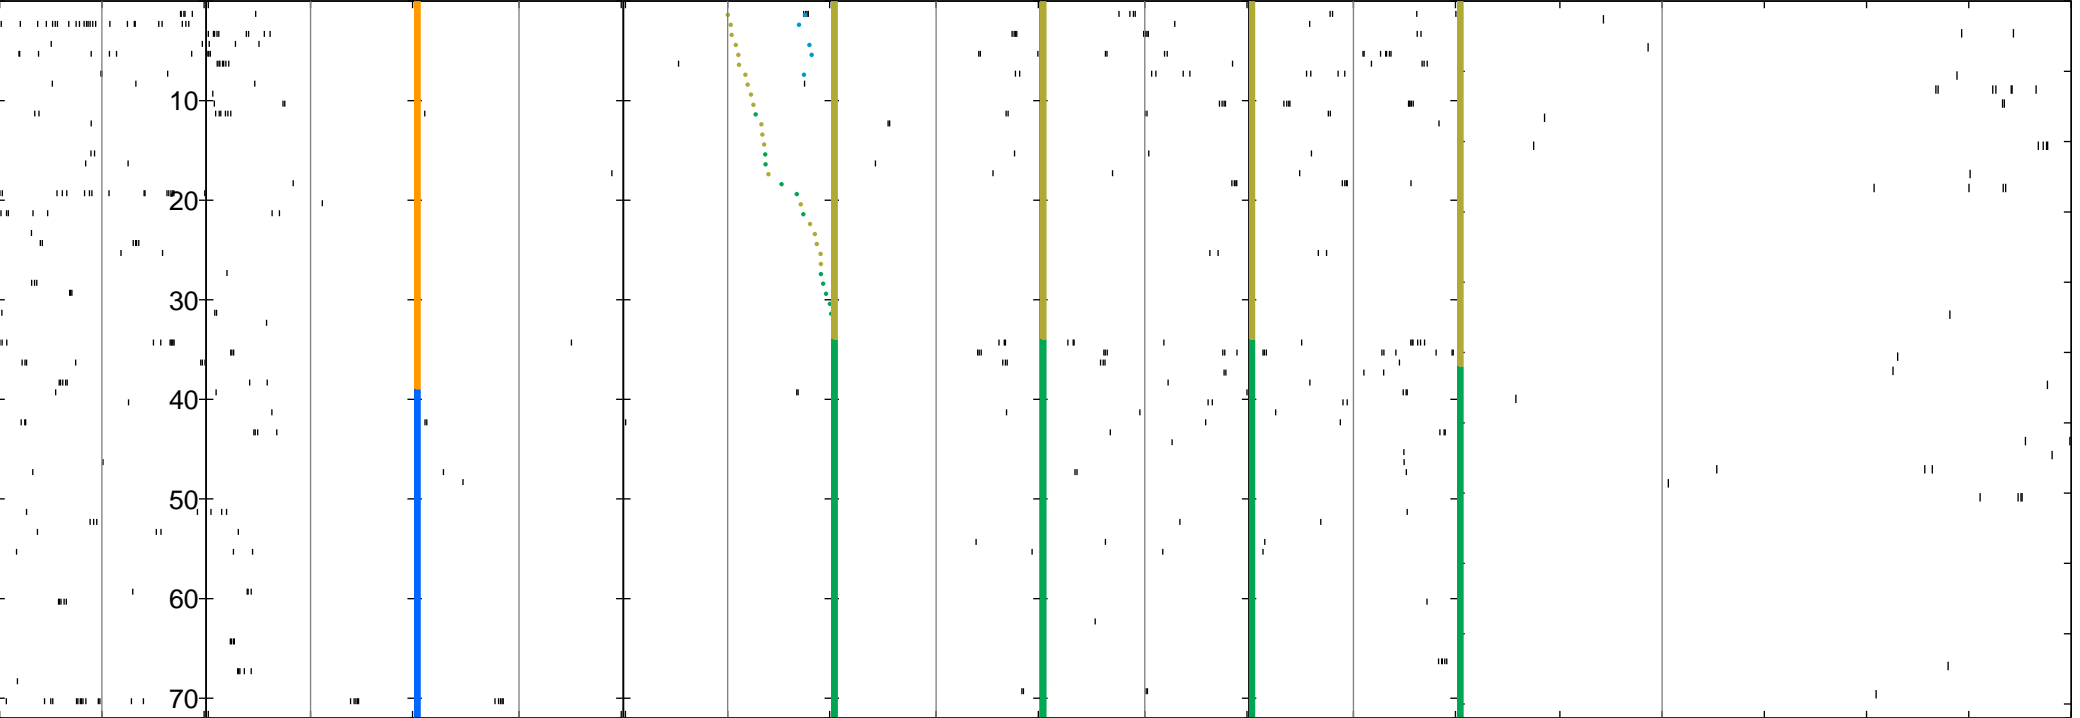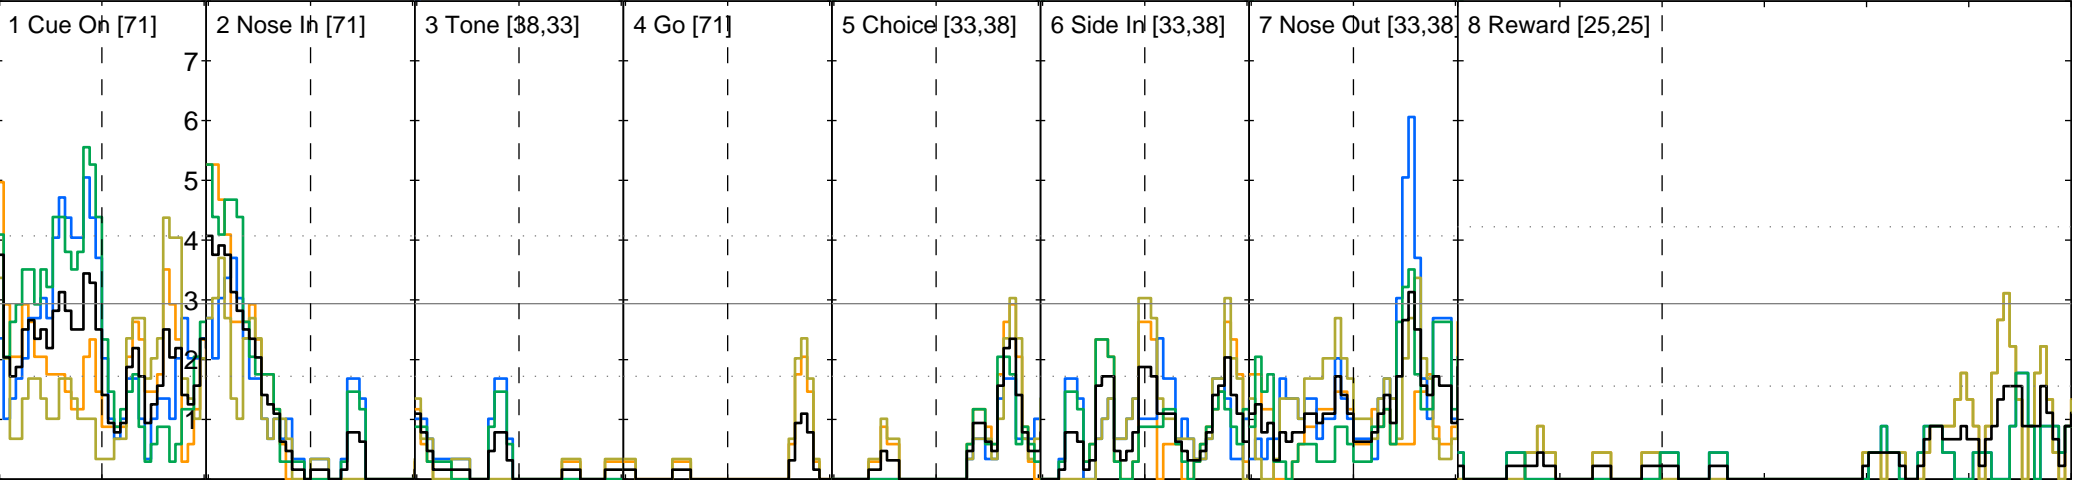

Cell: C0520070406T05b

AP: 2.2 ML: 1.2 DV: 7.6

w: 1 n: 11141  $P_{ISI>2}$ : 0.55

1/2pw: 358 $\mu$ s p $\rightarrow$ v: 957 $\mu$ s

$\beta_T$ : -3  $\beta_D$ : 3.4

$\beta_P$ : -5.5 SI: 0.34

Session FR: 2.55 Hz

Pk Ev: 2 - Nose in (Tone2)

Pk FR: 19.7Hz (-0.09s) MSN

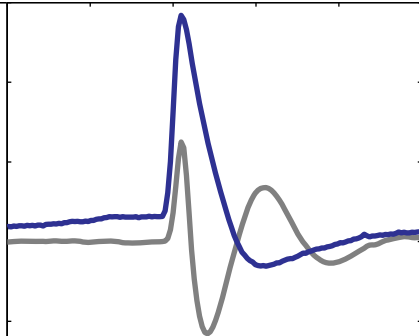

HP/PV

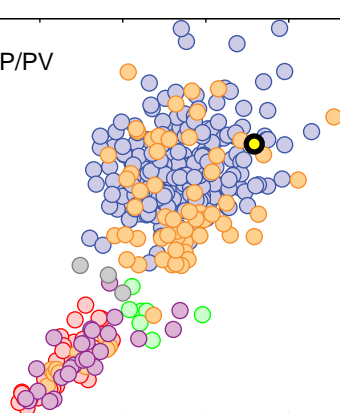

FR/PV

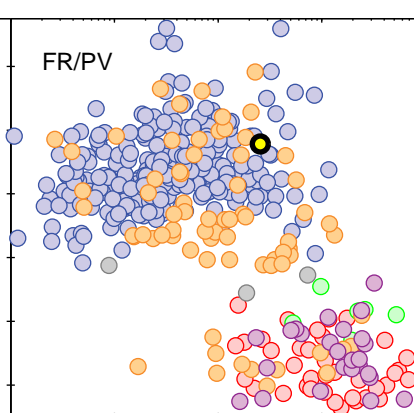

ISI Histogram [414]

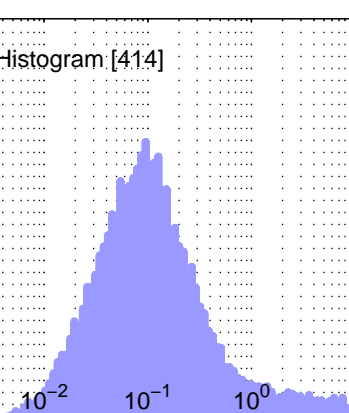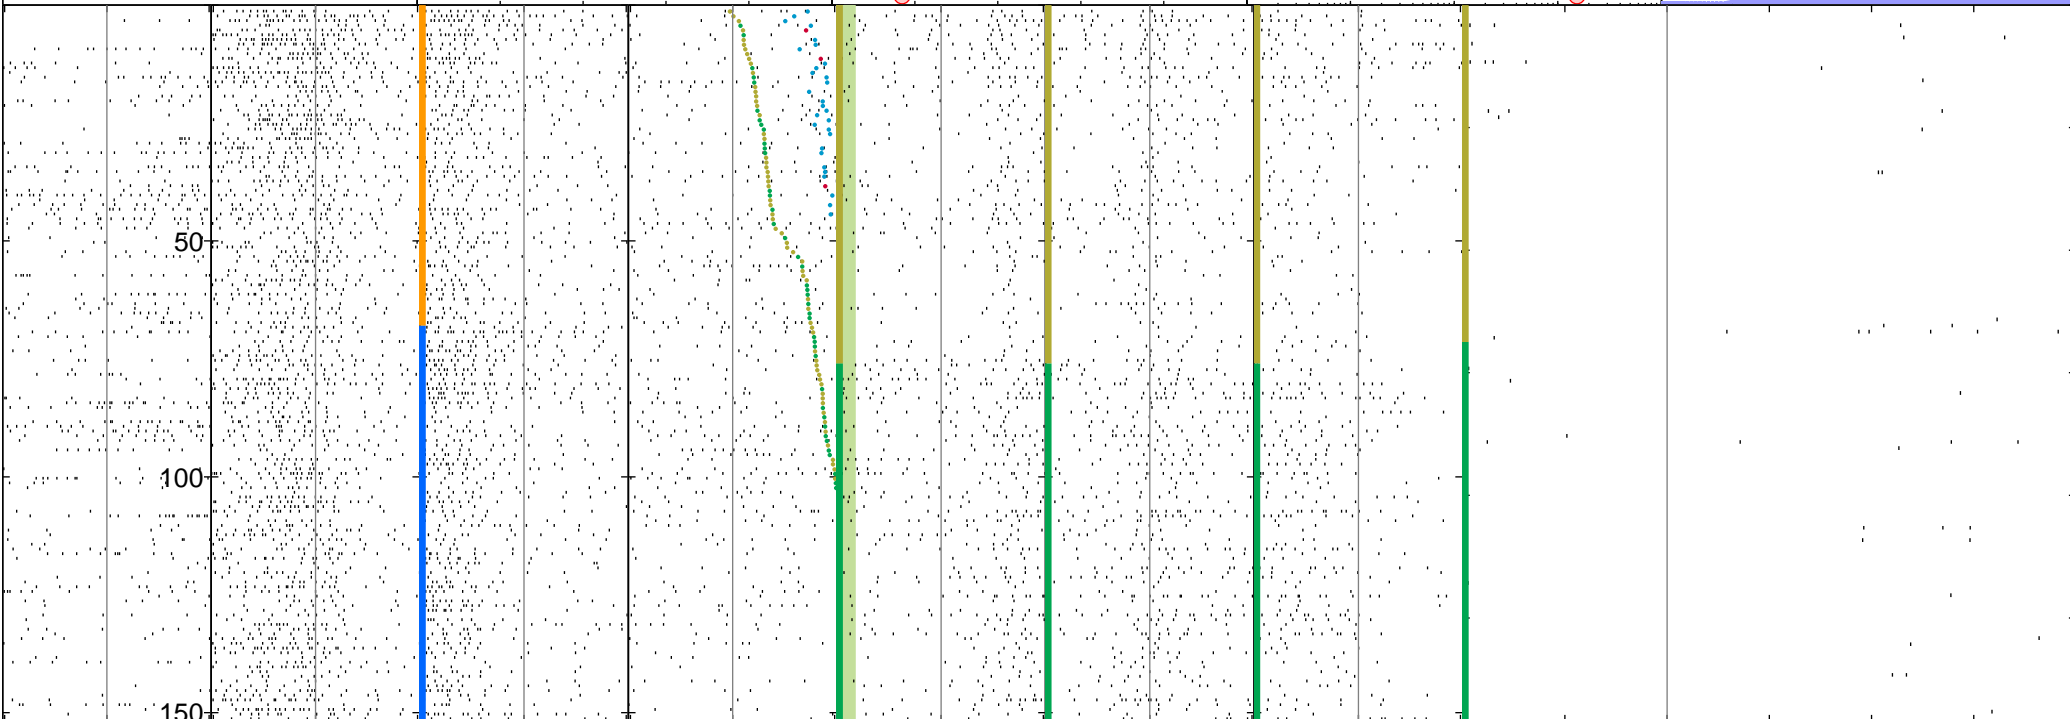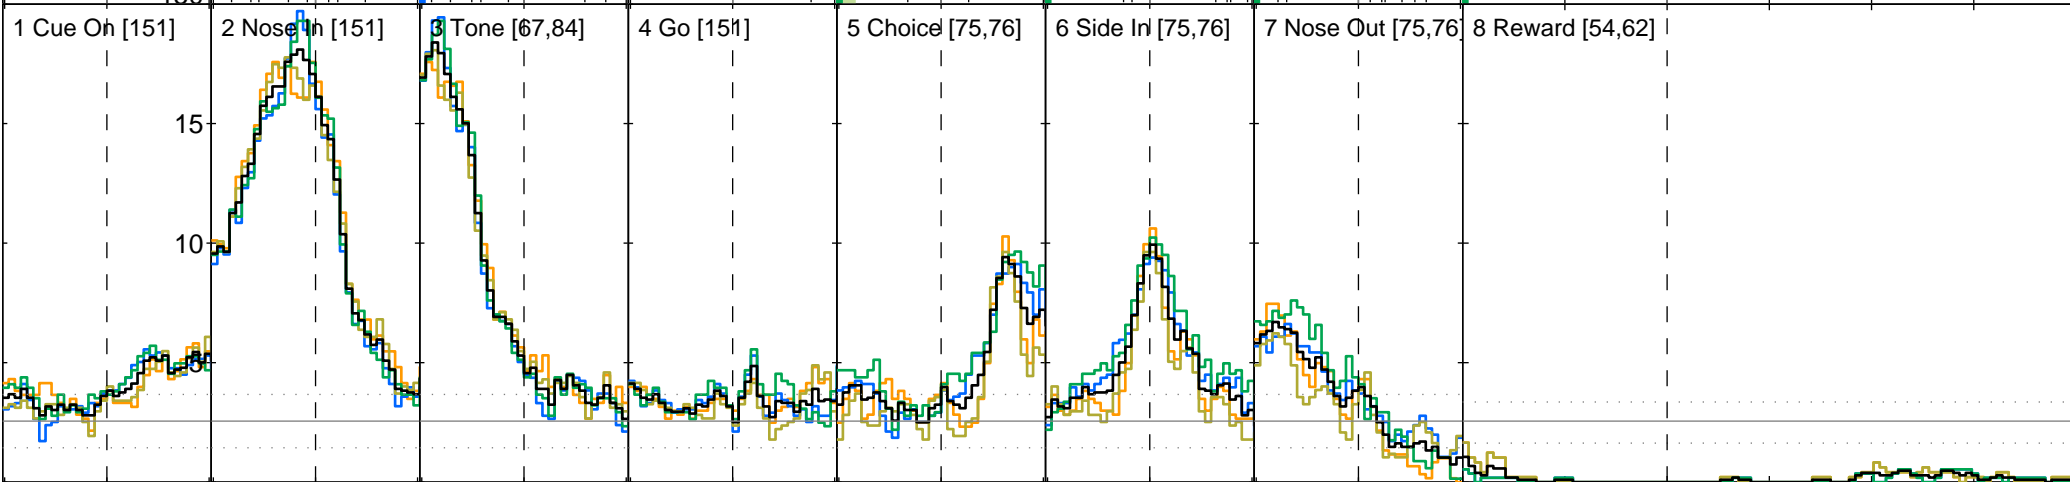

**Cell: C0320070621T07a**

AP: 0.96 ML: 3.6 DV: 6  
w: 3 n: 6270  $P_{ISI>2}$ : 0.56  
1/2pw: 278 $\mu$ s p->v: 854 $\mu$ s  
 $\beta_T$ : -2.5  $\beta_D$ : -3.7  
 $\beta_P$ : 2.1 SI: 0.87  
Session FR: 2.05 Hz  
Pk Ev: 2 - Nose in (Tone2)  
Pk FR: 31.8Hz (0.00s) **MSN**

Waveform

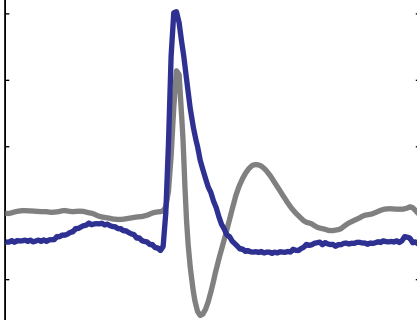

HP/PV

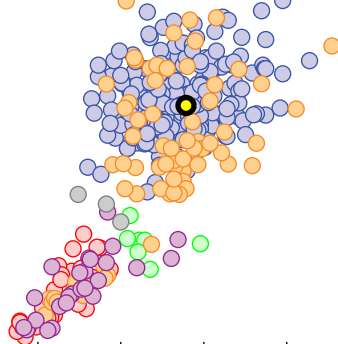

FR/PV

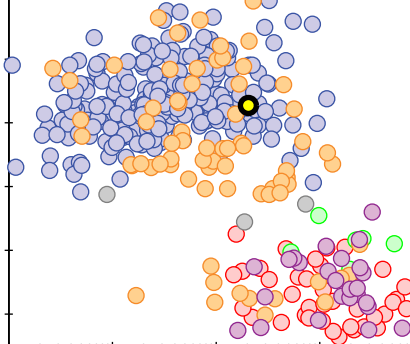

ISI Histogram [149]

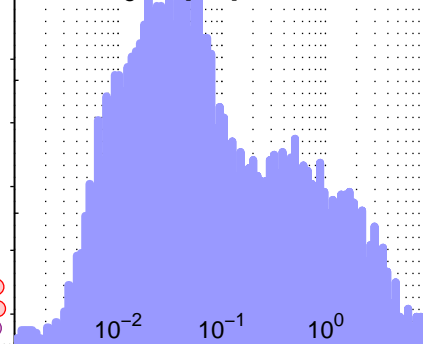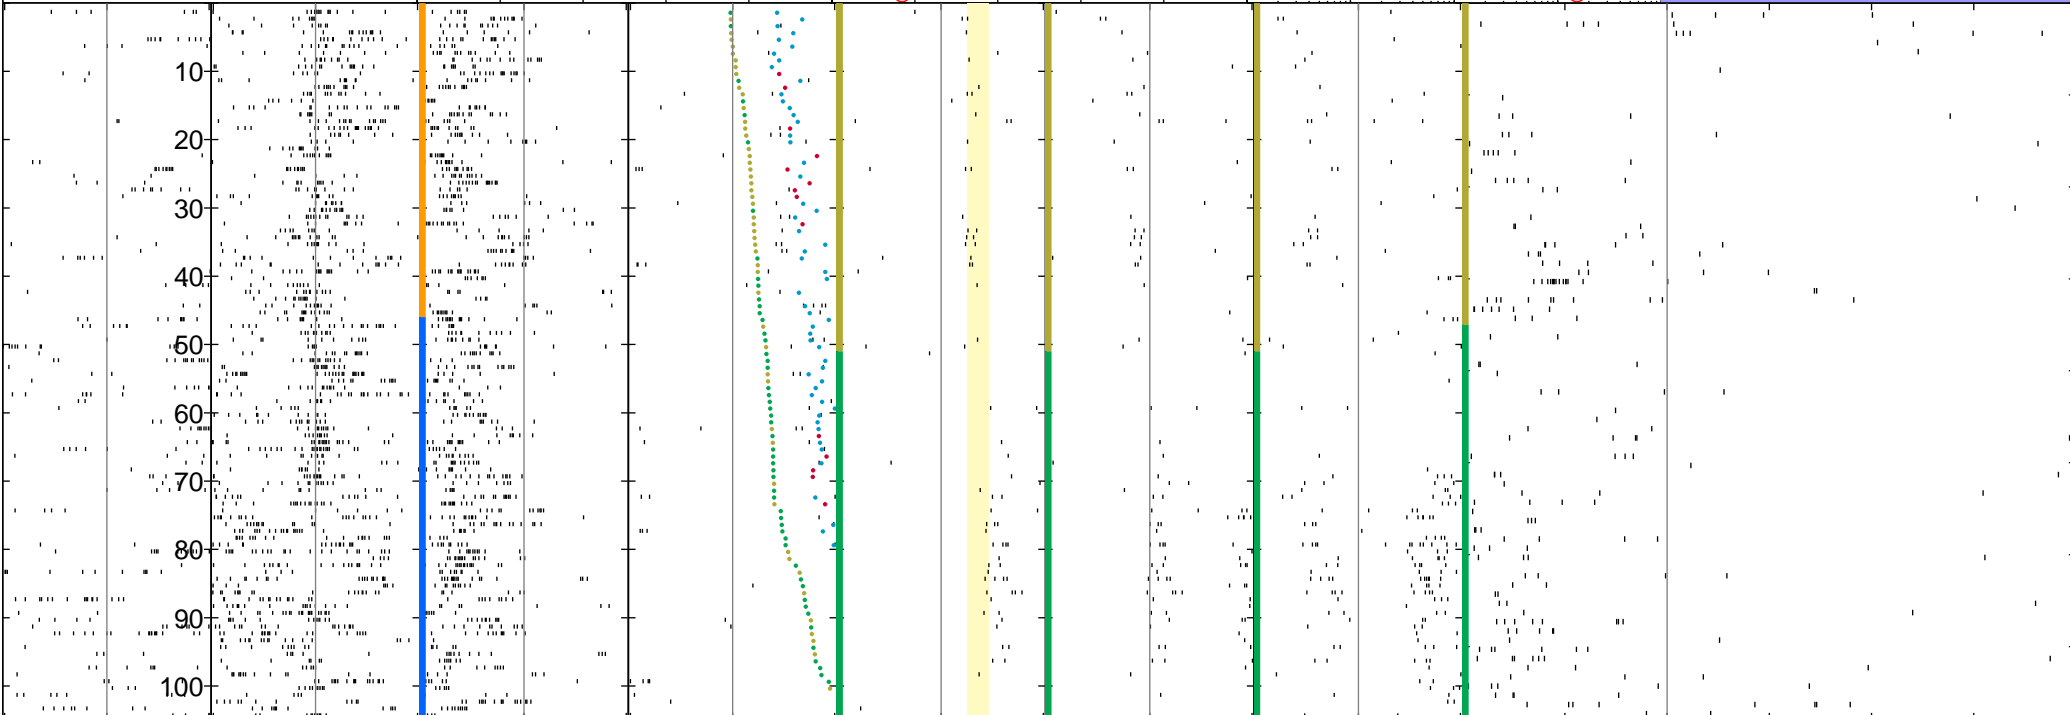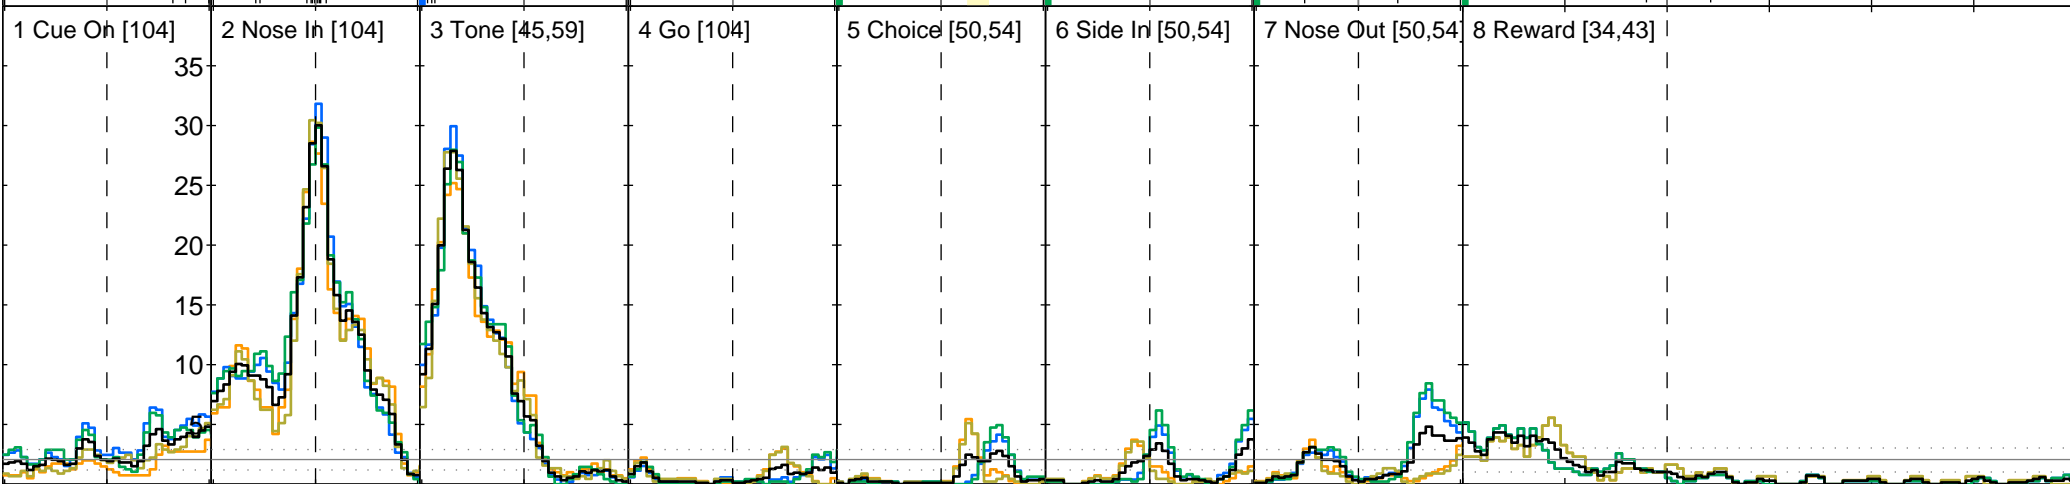



Cell: C0420070226T04d

AP: 2.5 ML: 1.8 DV: 5.7

w: 4 n: 52964  $P_{ISI>2}$ : 0.0095

1/2pw: 288 $\mu$ s p $\rightarrow$ v: 1109 $\mu$ s

$\beta_T$ : 2.8  $\beta_D$ : -3

$\beta_P$ : 3 SI: -0.25

Session FR: 8.49 Hz

Pk Ev: 2 - Nose in (Tone2)

Pk FR: 30.2Hz (0.18s) **MSN**

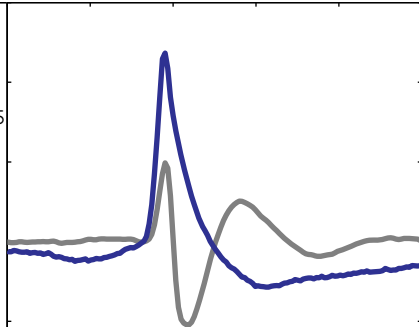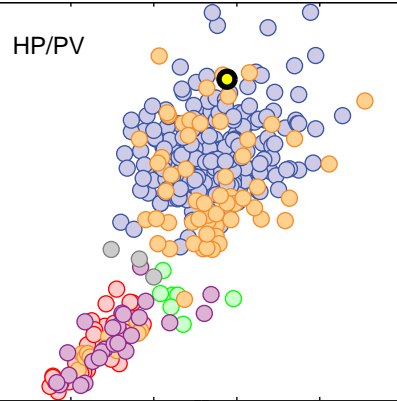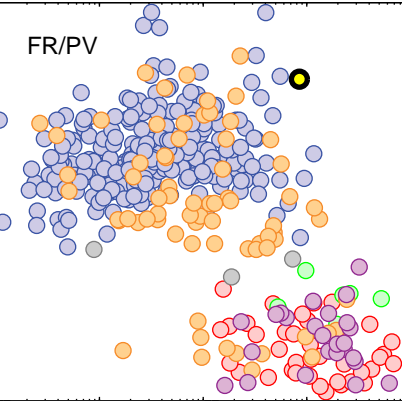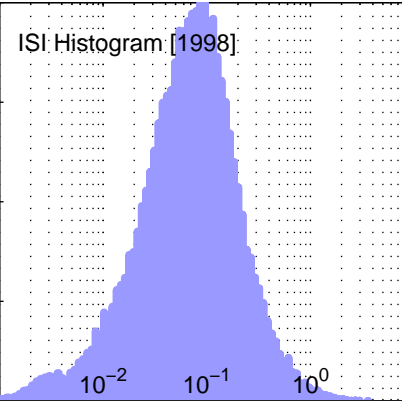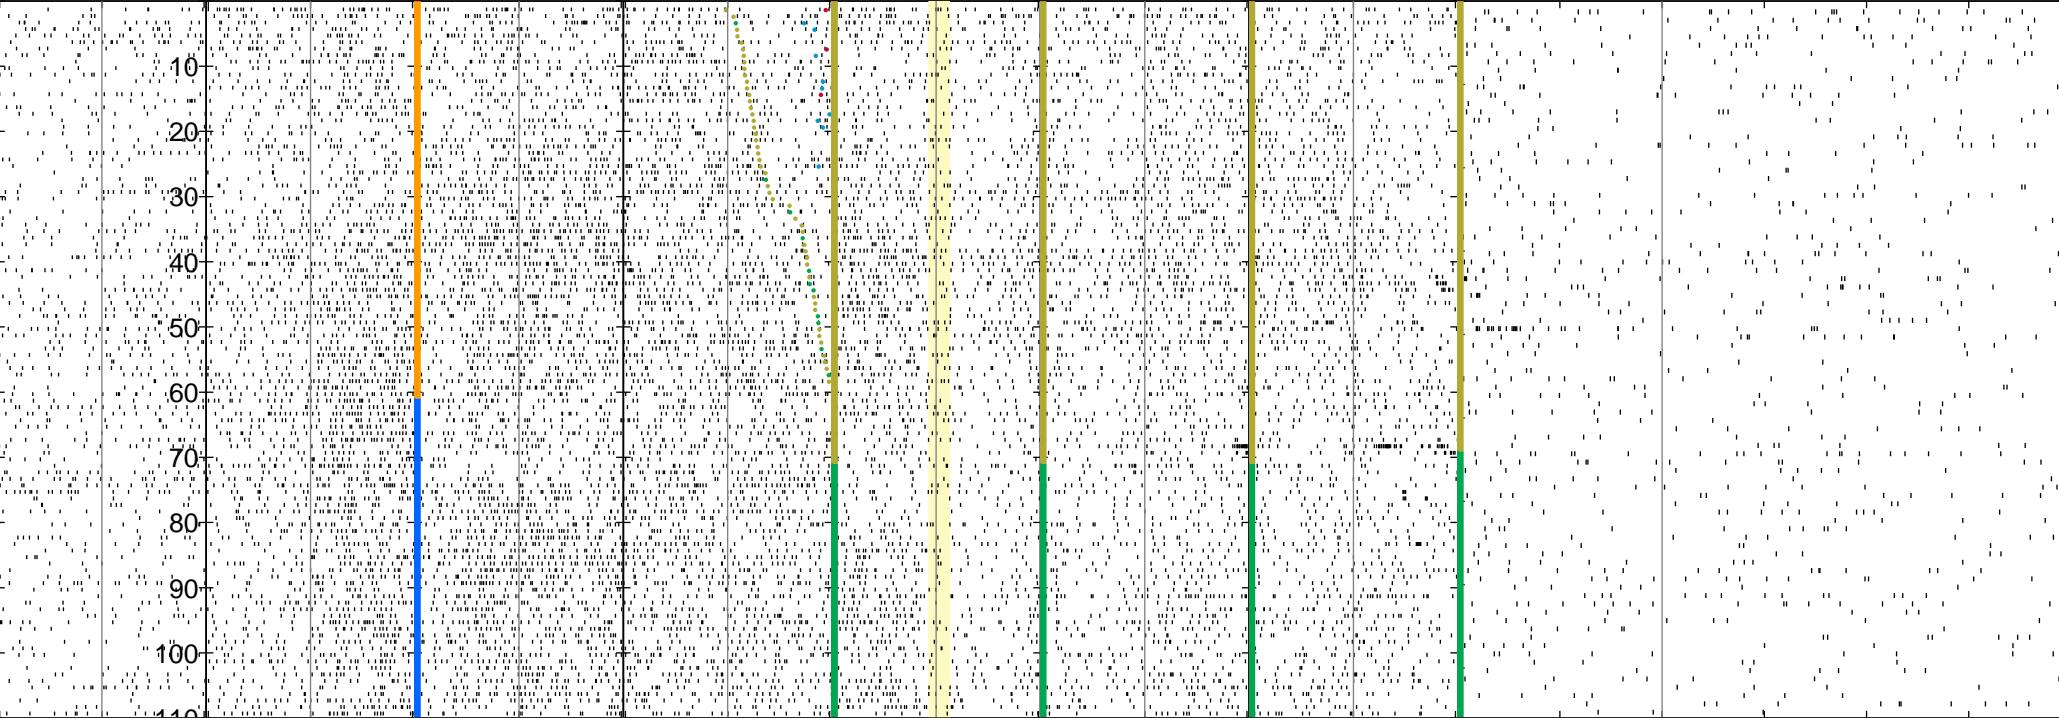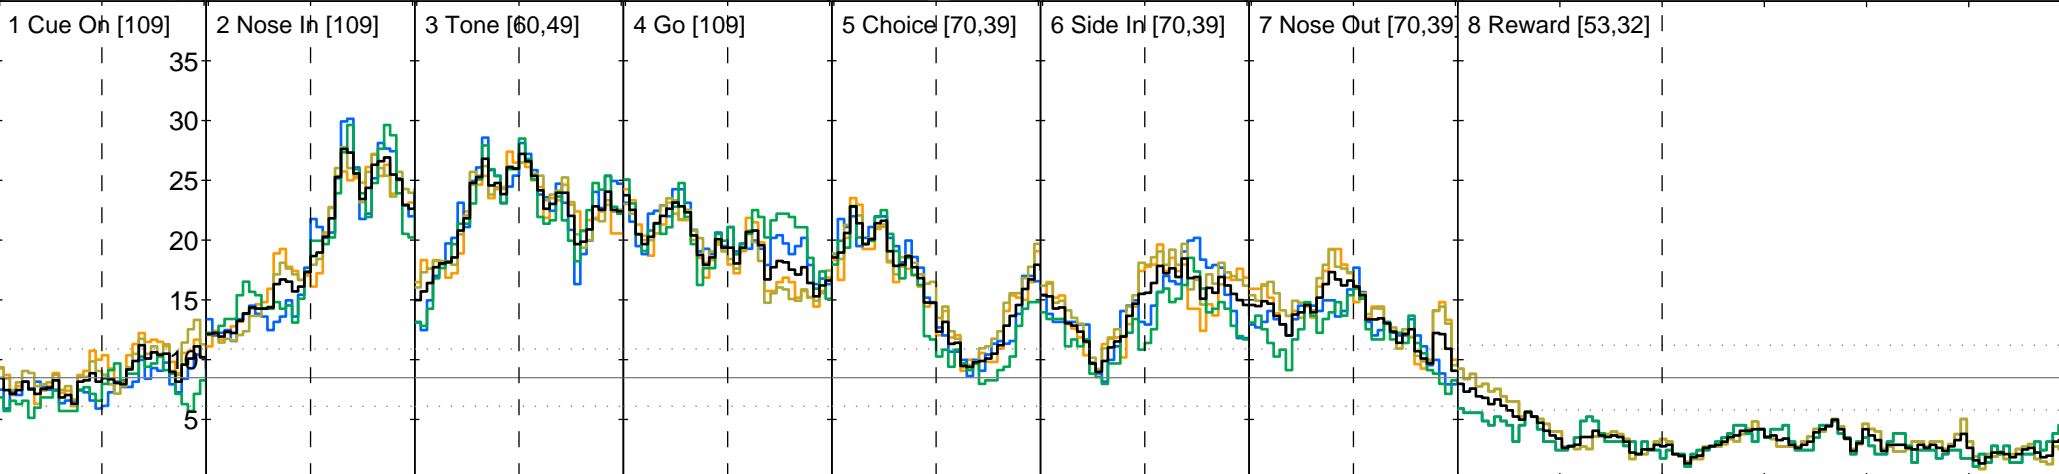

Cell: C0320070626T07a

AP: 0.96 ML: 3.6 DV: 6.8

w: 3 n: 2916  $P_{ISI>2}$ : 0.76

1/2pw: 331 $\mu$ s p->v: 909 $\mu$ s

$\beta_T$ : -2.9  $\beta_D$ : 2.7

$\beta_P$ : -3.2 SI: -0.14

Session FR: 0.778 Hz

Pk Ev: 2 - Nose in (Tone1)

Pk FR: 9.04Hz (0.96s) **MSN**

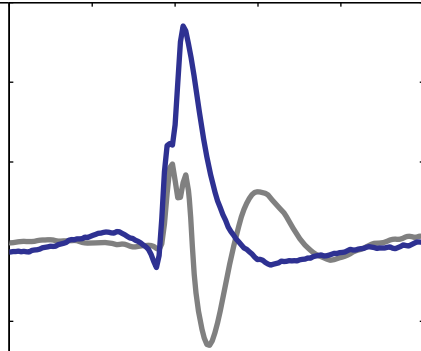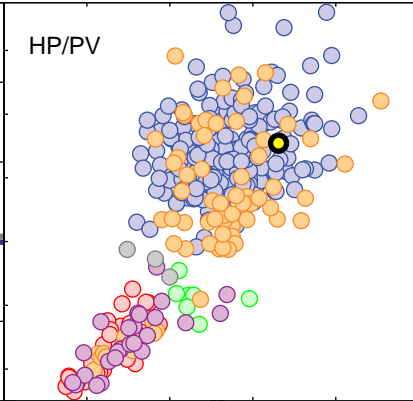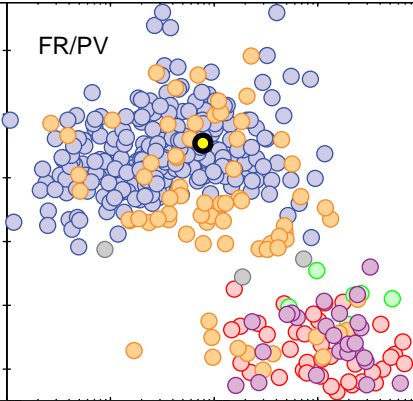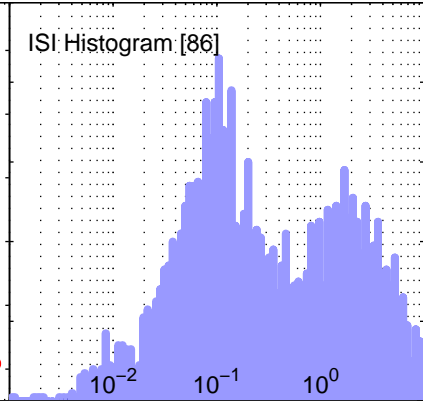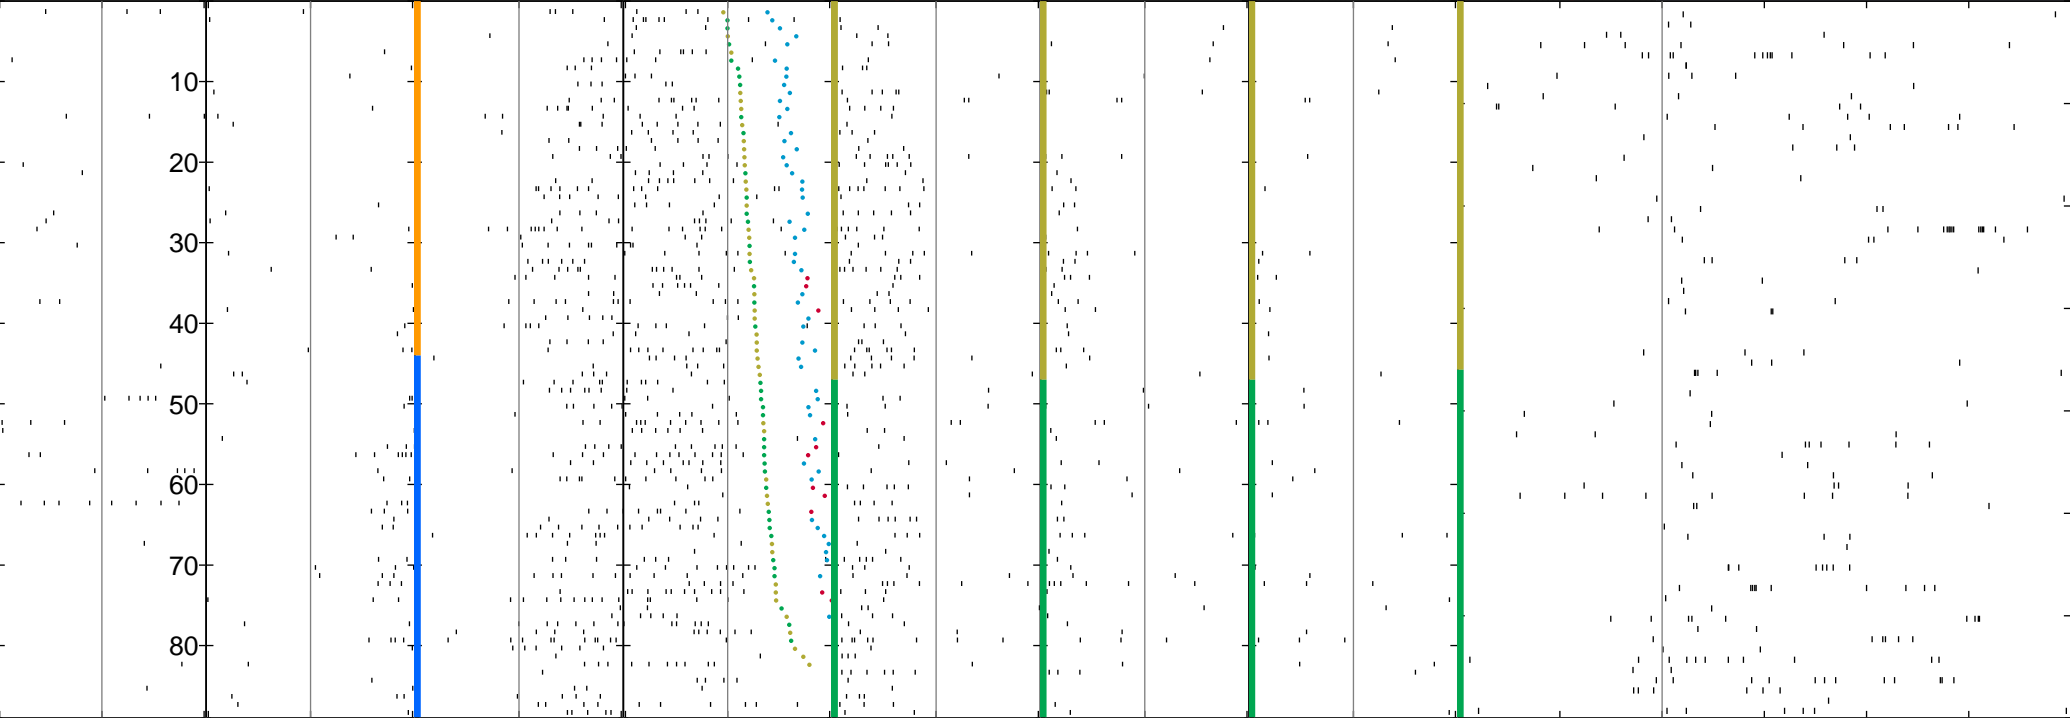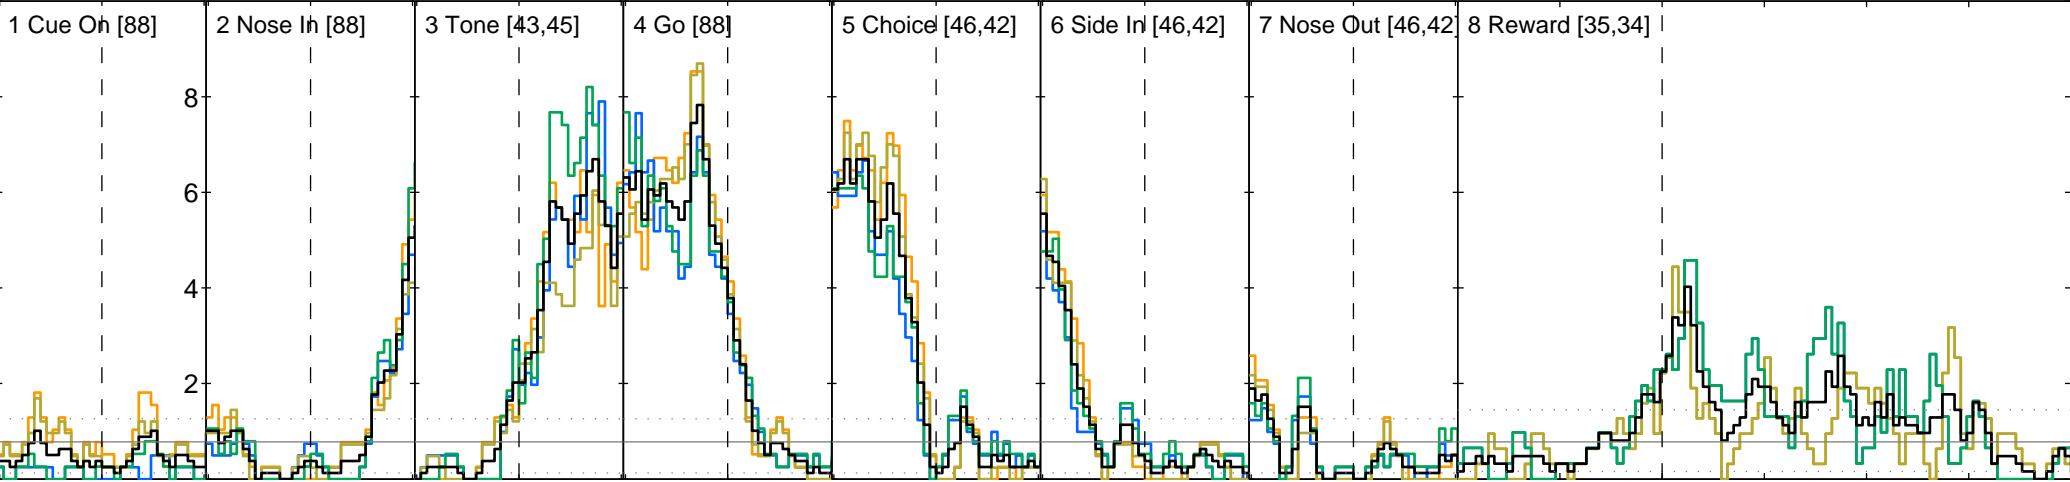

Cell: C0320070622T07e

AP: 0.96 ML: 3.6 DV: 6.1

w: 3 n: 21757  $P_{ISI>2}$ : 0.1

1/2pw: 282 $\mu$ s p $\rightarrow$ v: 794 $\mu$ s

$\beta_T$ : 3.6  $\beta_D$ : 7.1

$\beta_P$ : -3.5 SI: 0.78

Session FR: 5.5 Hz

Pk Ev: 3 - Tone (Tone2)

Pk FR: 23Hz (-0.99s) **MSN**

Waveform

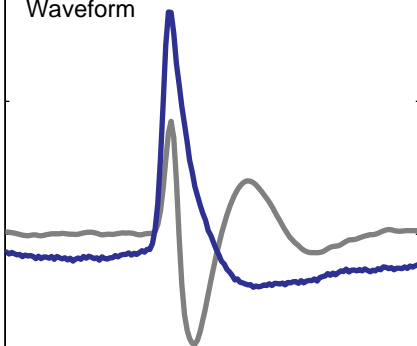

HP/PV

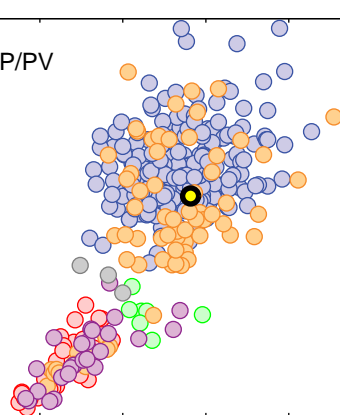

FR/PV

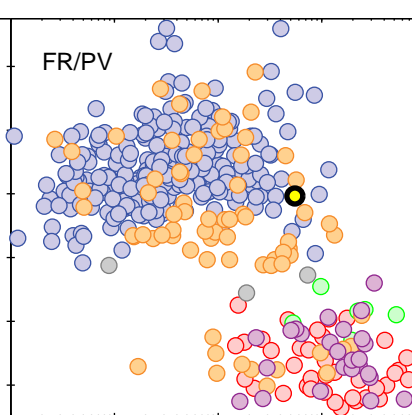

ISI Histogram [545]

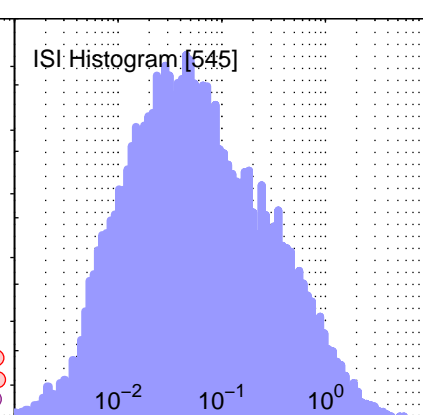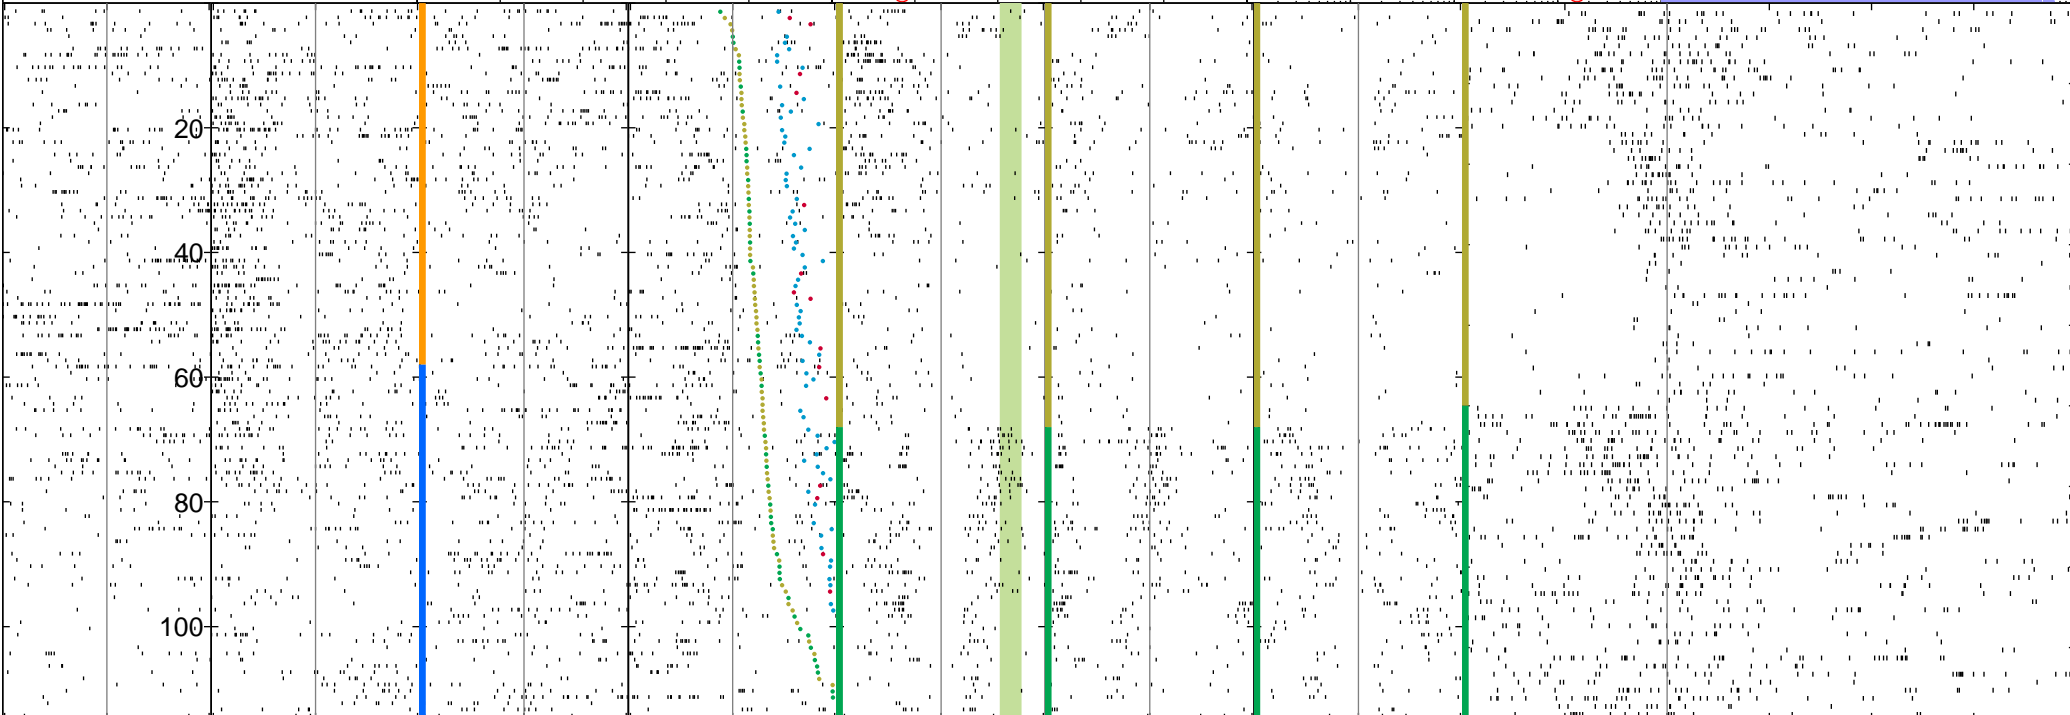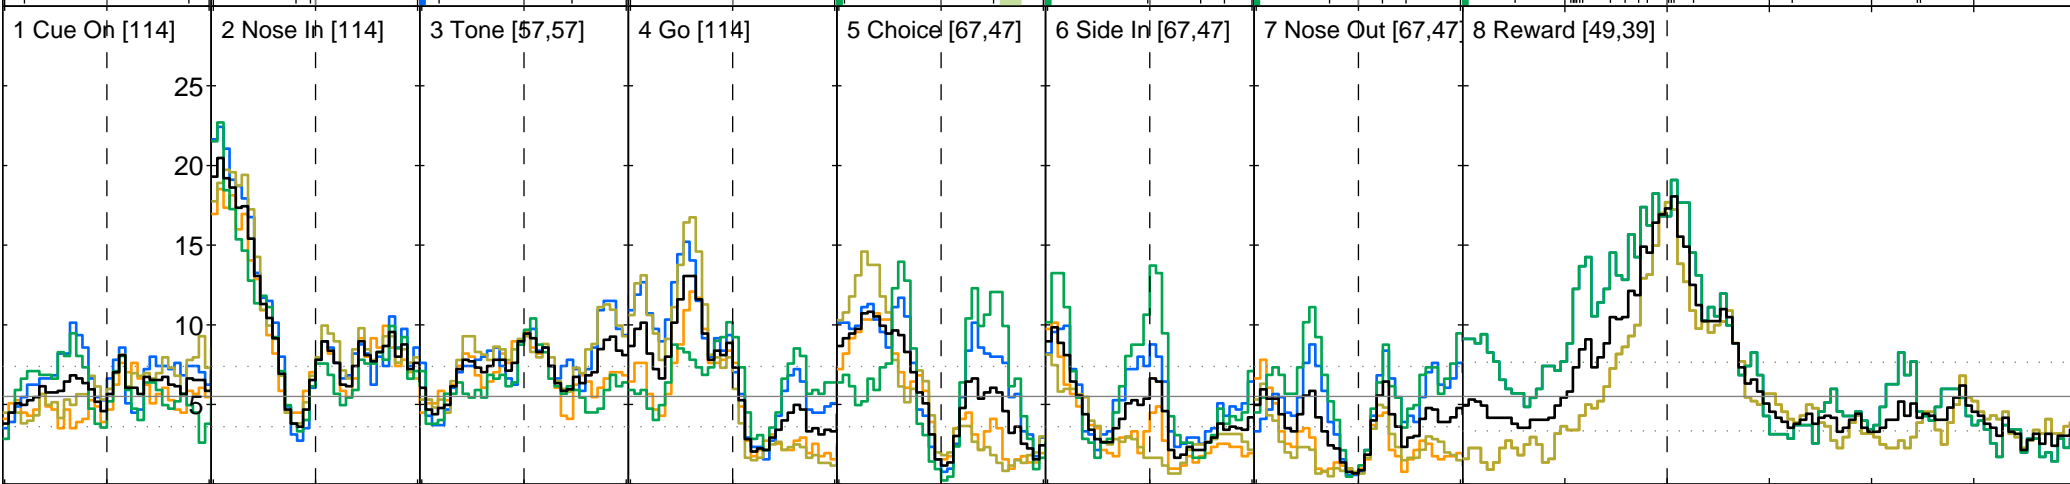

**Cell: C1220071025T05c**

AP: 1.4 ML: 2.1 DV: 6.9

w: 4 n: 9927  $P_{ISI>2}$ : 0.491/2pw: 317 $\mu$ s p->v: 821 $\mu$ s $\beta_T$ : -1.7  $\beta_D$ : 1.4 $\beta_P$ : -0.92 SI: NaN

Session FR: 1.47 Hz

Pk Ev: 3 - Tone (Tone2)

Pk FR: 5.72Hz (-0.3s) **MSN**

Waveform

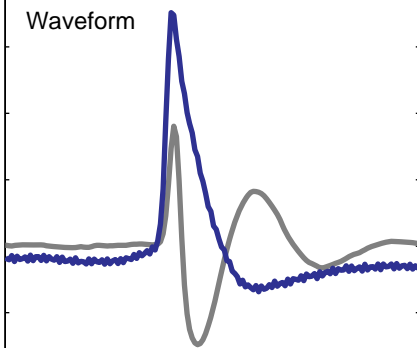

HP/PV

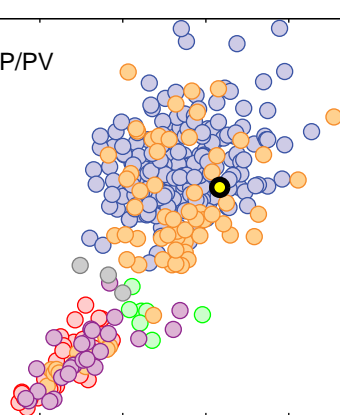

FR/PV

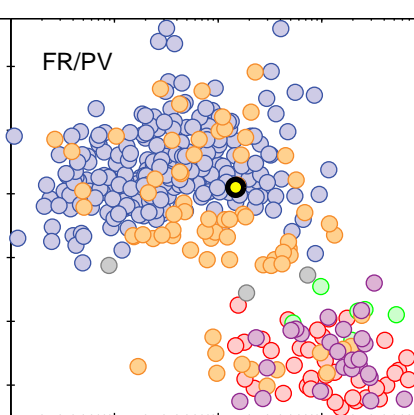

ISI Histogram [277]

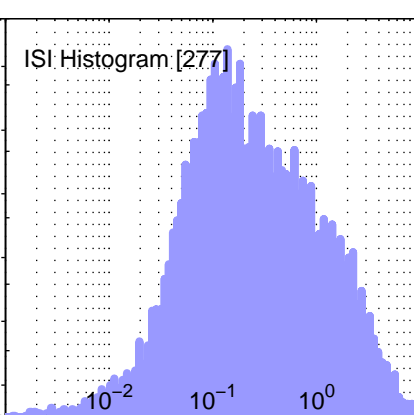

10

20

30

40

50

60

70

1 Cue On [77]

2 Nose In [77]

3 Tone [44,33]

4 Go [77]

5 Choice [38,39]

6 Side In [38,39]

7 Nose Out [38,39]

8 Reward [31,26]

5

4

3

2

1

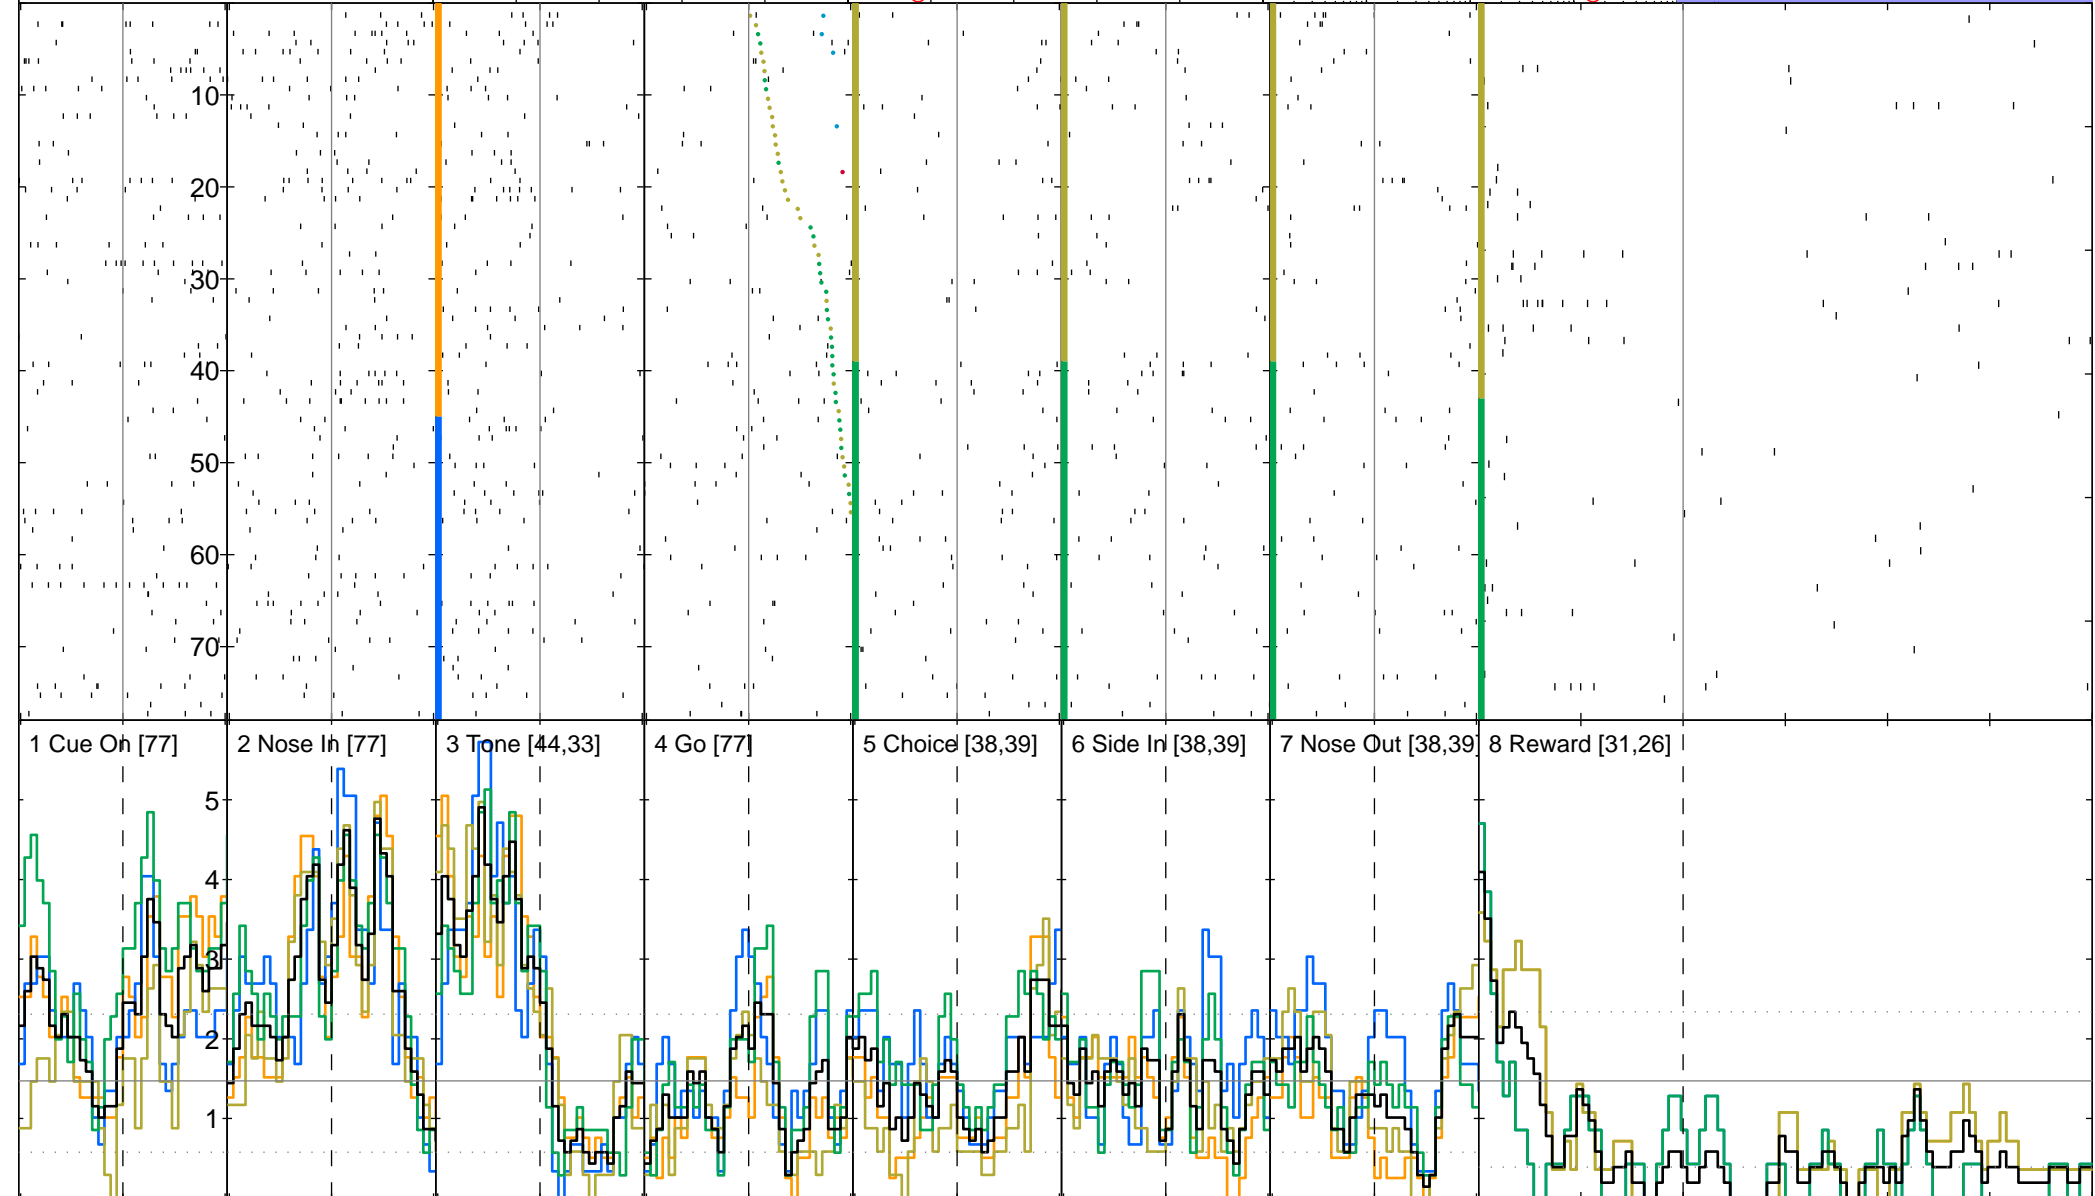

Cell: C0320070630T09g

AP: 1.6 ML: 3.7 DV: 6.2

w: 2 n: 7730  $P_{ISI>2}$ : 0.15

1/2pw: 309 $\mu$ s p $\rightarrow$ v: 792 $\mu$ s

$\beta_T$ : -3.6  $\beta_D$ : 2.7

$\beta_P$ : 4.2 SI: -0.23

Session FR: 2.55 Hz

Pk Ev: 3 - Tone (Tone1)

Pk FR: 14.6Hz (-0.15s) MSN

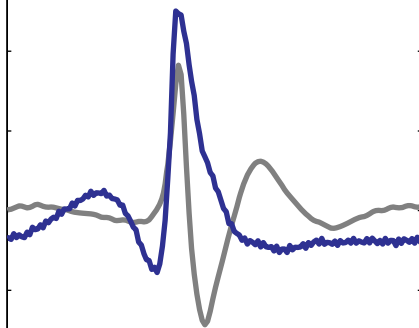

HP/PV

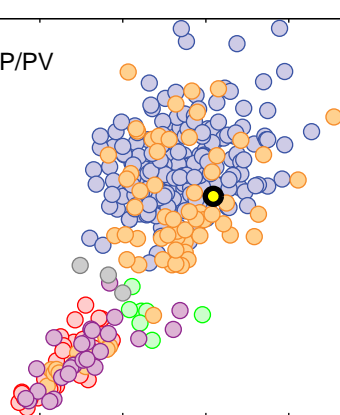

FR/PV

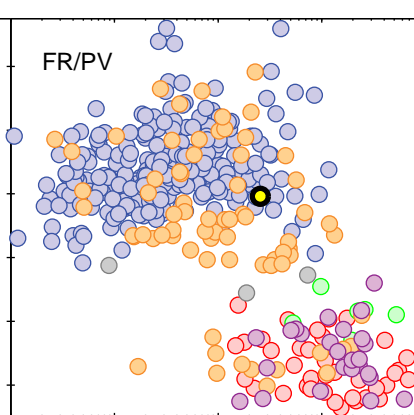

ISI Histogram [228]

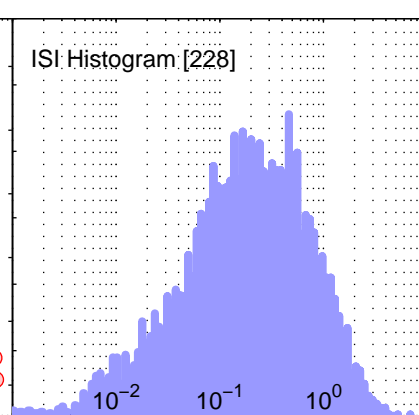

10  
20  
30  
40  
50  
60  
70  
80

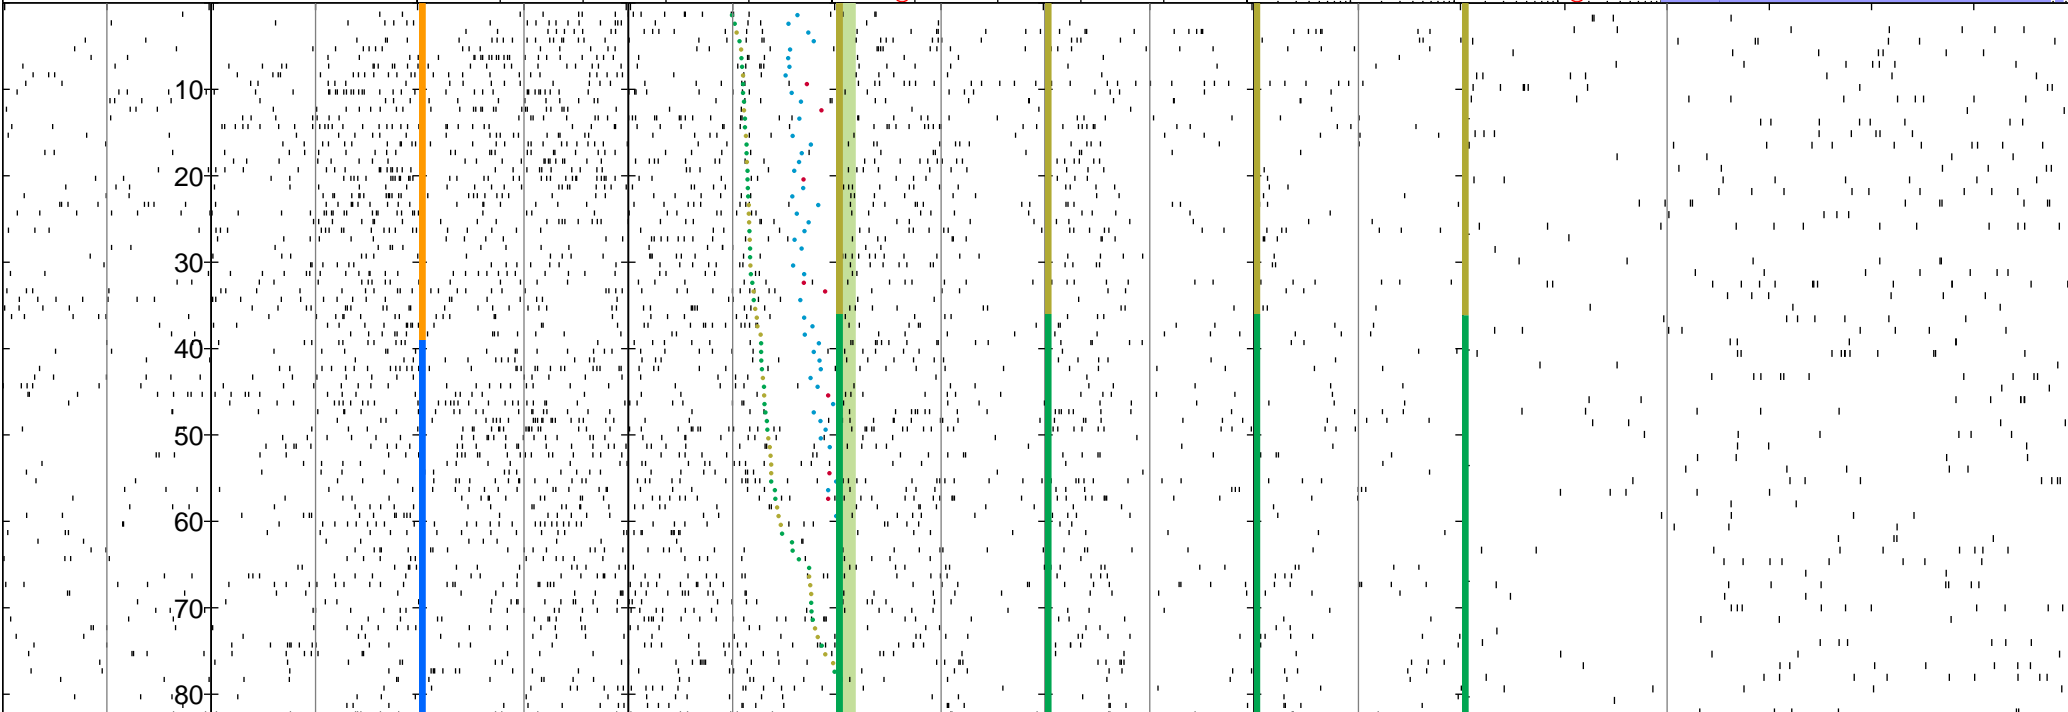

1 Cue On [82]

2 Nose In [82]

3 Tone [38,44]

4 Go [82]

5 Choice [35,47]

6 Side In [35,47]

7 Nose Out [35,47]

8 Reward [26,35]

10  
5

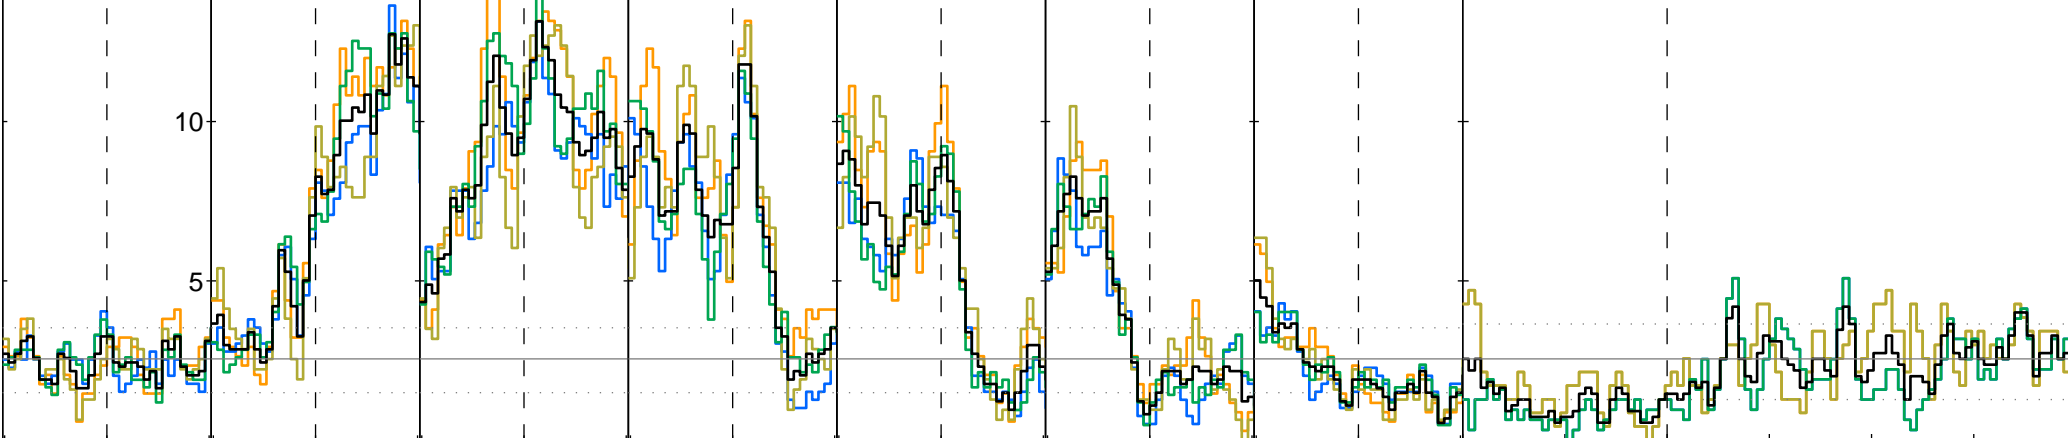



**Cell: C0320070622T07d**

AP: 0.96 ML: 3.6 DV: 6.1

w: 3 n: 1493  $P_{ISI>2}$ : 0.91

1/2pw: 262 $\mu$ s p->v: 888 $\mu$ s

$\beta_T$ : -4.5  $\beta_D$ : 7.2

$\beta_P$ : -3.6 SI: 1

Session FR: 0.378 Hz

Pk Ev: 3 - Tone (Tone2)

Pk FR: 8.38Hz (0.03s) **MSN**

Waveform

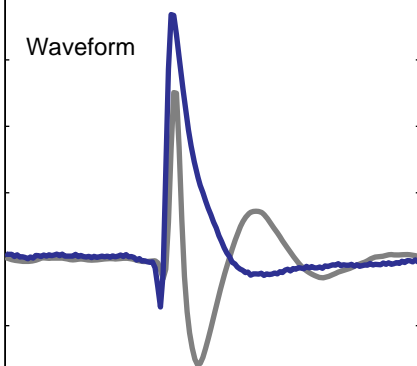

HP/PV

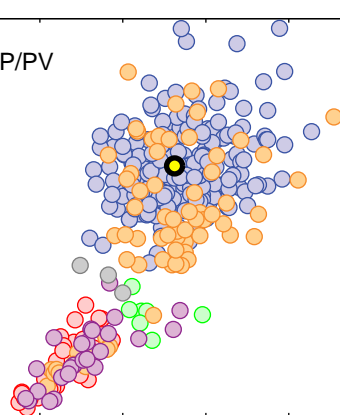

FR/PV

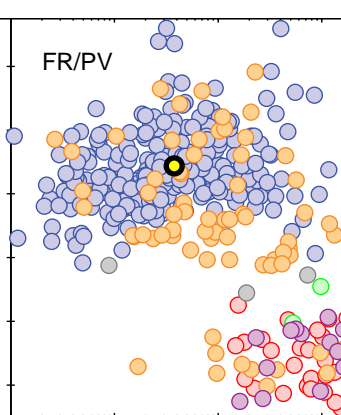

ISI Histogram [29]

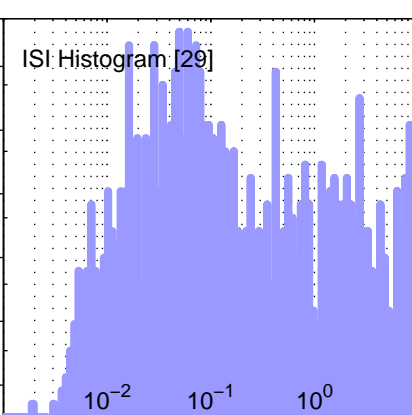

20  
40  
60  
80  
100

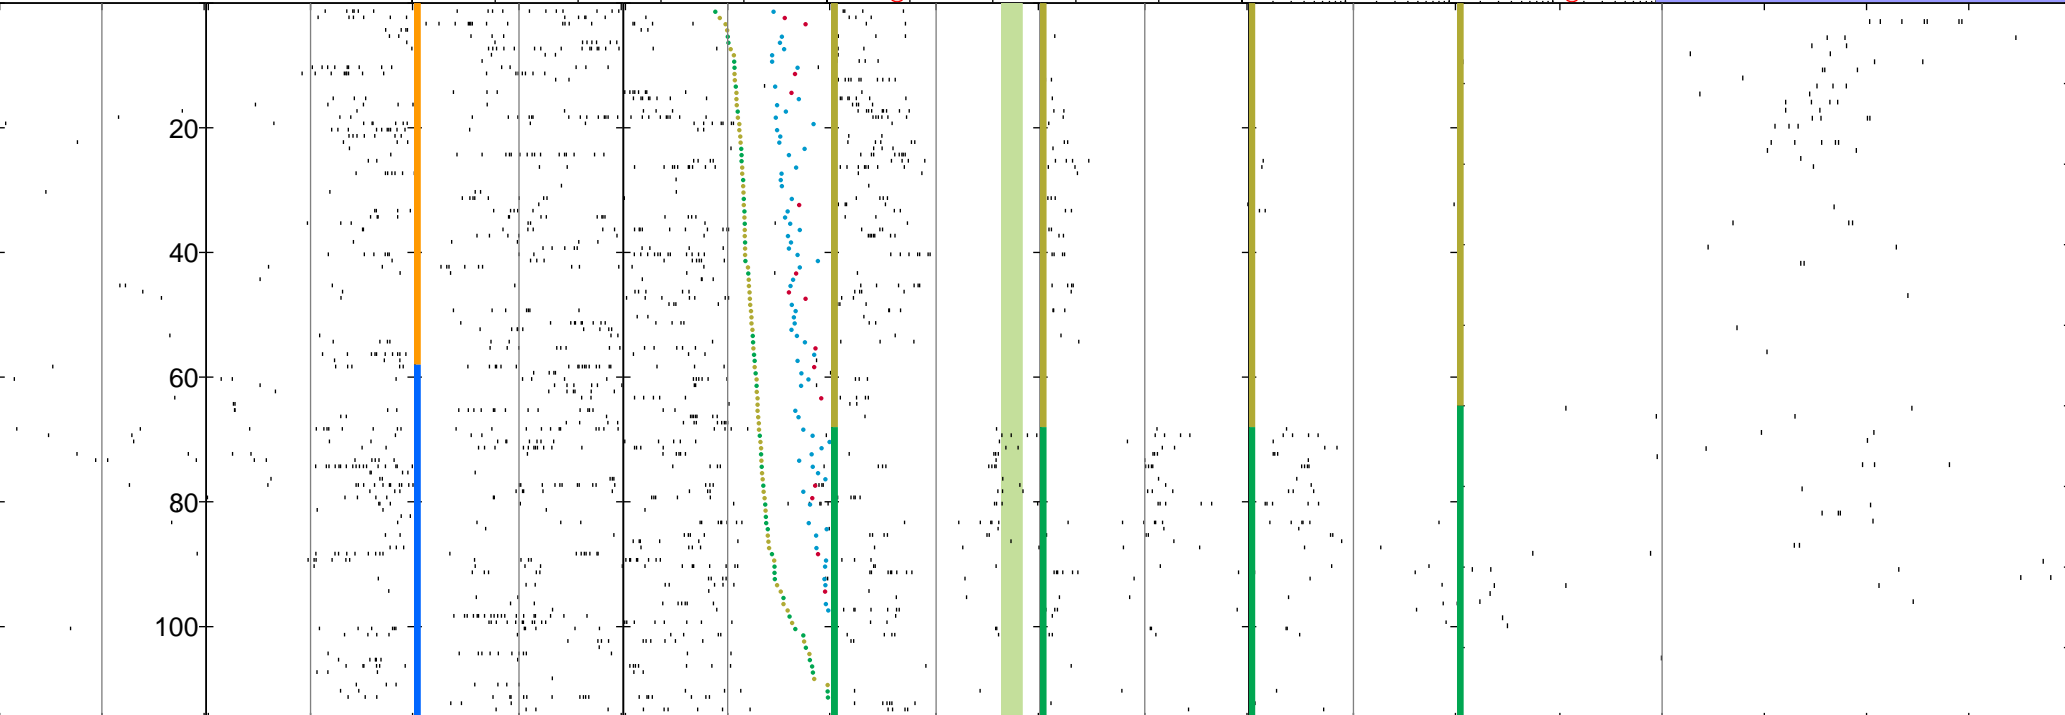

1 Cue On [114] 2 Nose In [114] 3 Tone [57,57] 4 Go [114] 5 Choice [67,47] 6 Side In [67,47] 7 Nose Out [67,47] 8 Reward [49,39]

8  
6  
4  
2

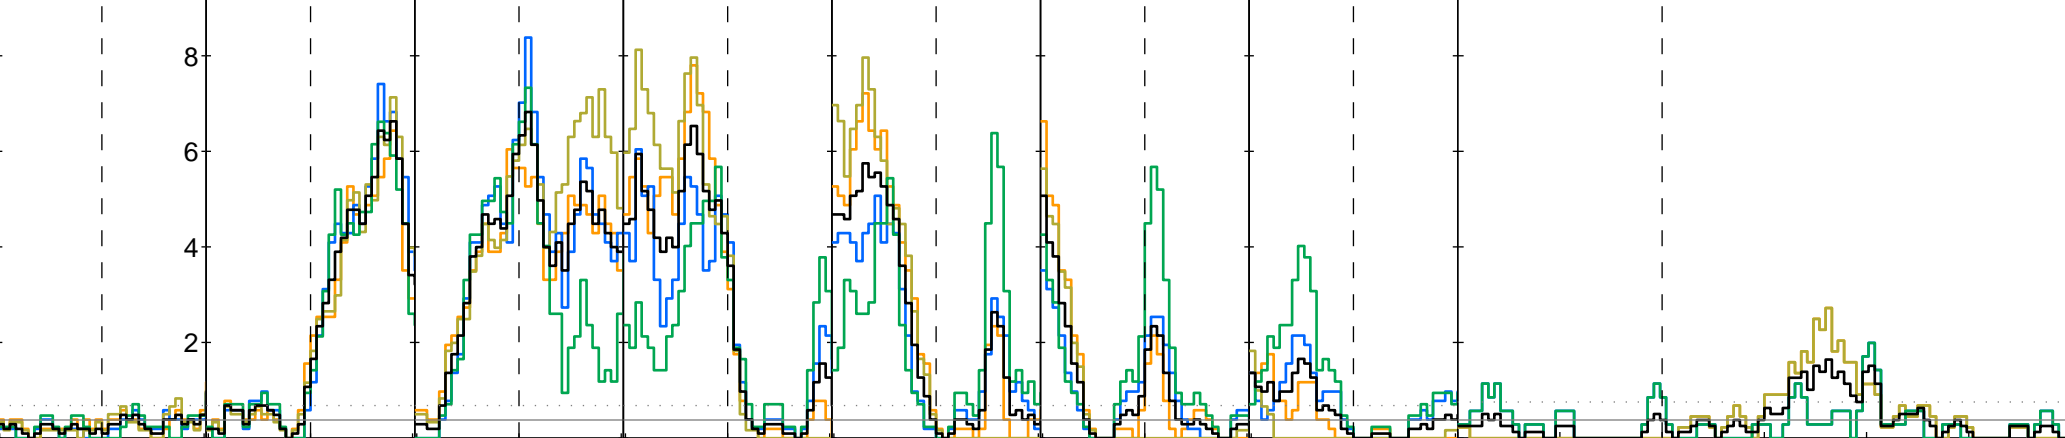

Cell: C1220071024T11a

AP: -2.8 ML: 4.2 DV: 6.7

w: 1 n: 63772  $P_{ISI>2}$ : 1.8

1/2pw: 242 $\mu$ s p->v: 613 $\mu$ s

$\beta_T$ : NaN  $\beta_D$ : NaN

$\beta_P$ : NaN SI: -0.18

Session FR: 8.65 Hz

Pk Ev: 3 - Tone (Tone2)

Pk FR: 31.2Hz (0.1s) **MSN**

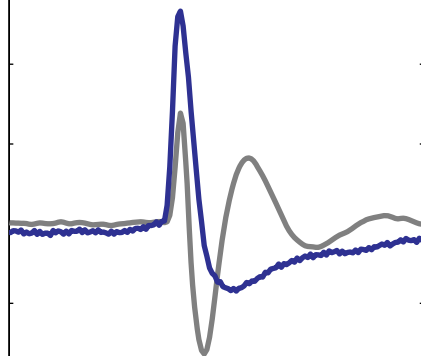

HP/PV

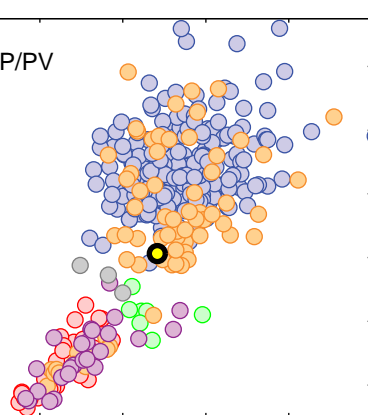

FR/PV

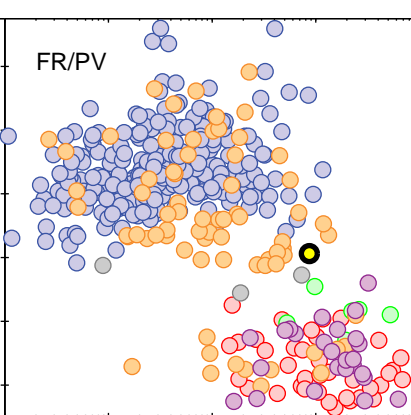

ISI Histogram [2532]

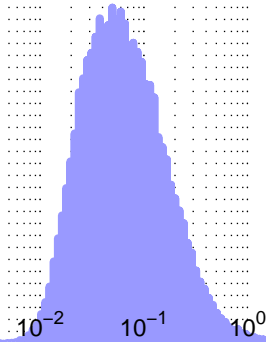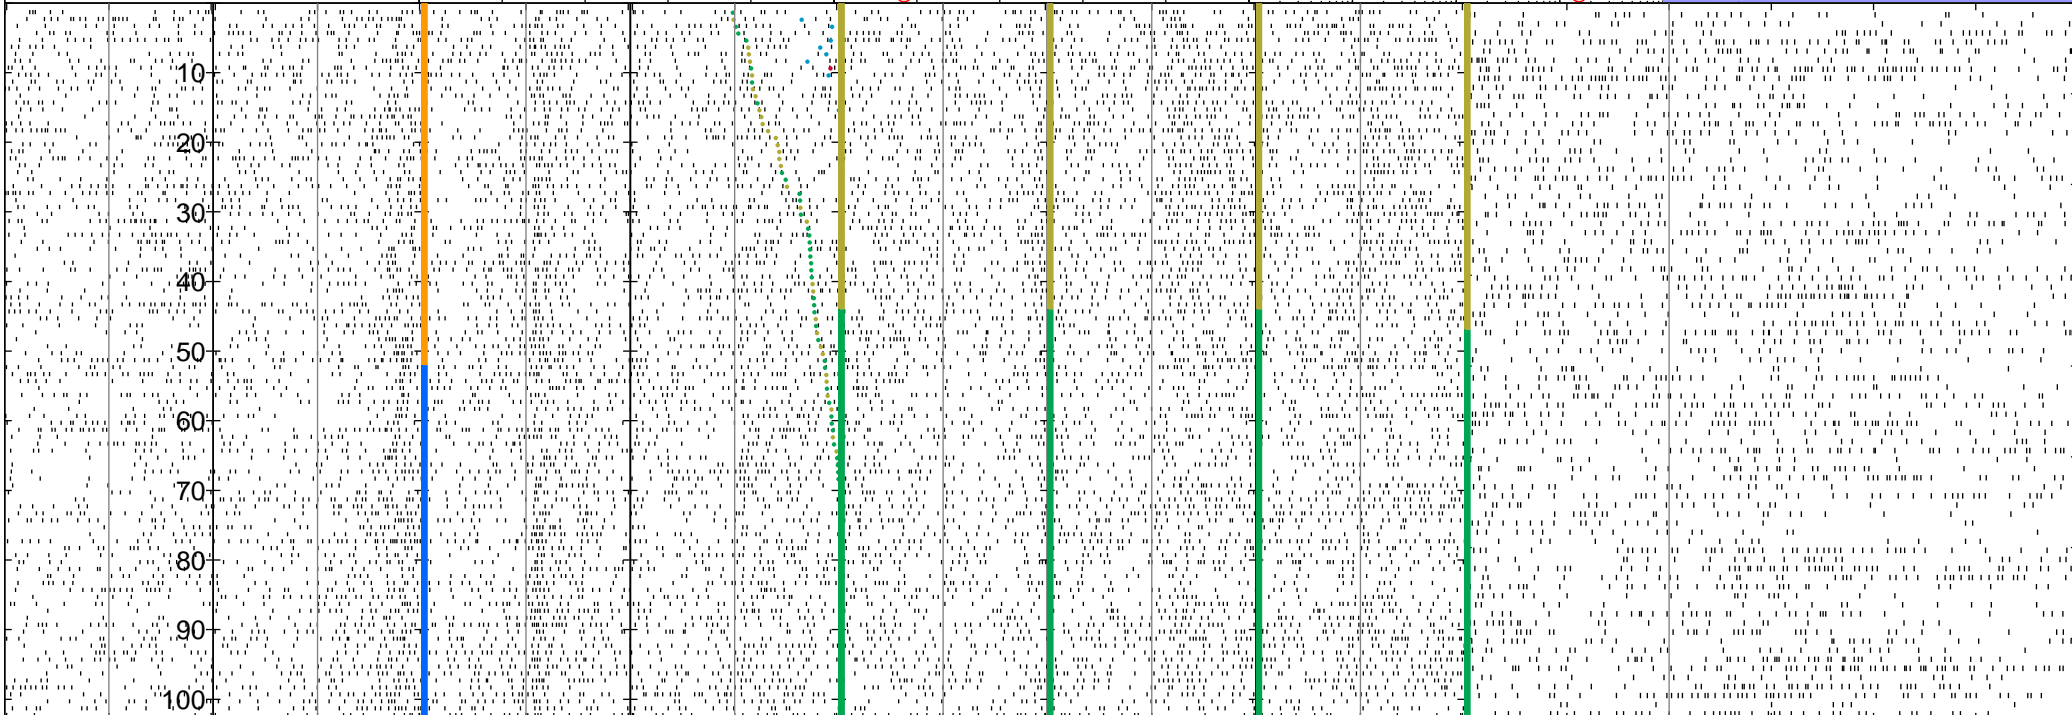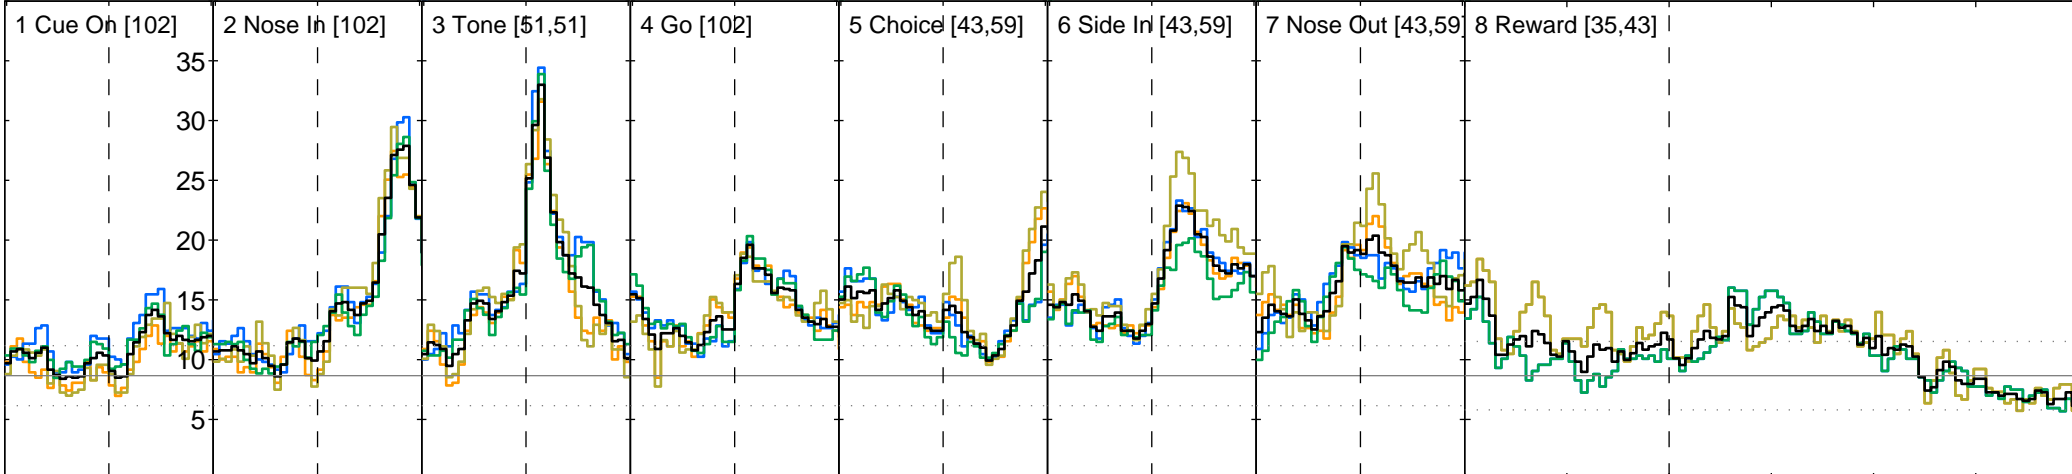

Cell: C0320070618T07F

AP: 0.96 ML: 3.6 DV: 5.6

w: 2 n: 58840  $P_{ISI>2}$ : 0.0042

1/2pw: 165 $\mu$ s p $\rightarrow$ v: 876 $\mu$ s

$\beta_T$ : 2.9  $\beta_D$ : -2.3

$\beta_P$ : -2.5 SI: -0.31

Session FR: 11.7 Hz

Pk Ev: 3 - Tone (Contra)

Pk FR: 27.1Hz (0.27s) MSN

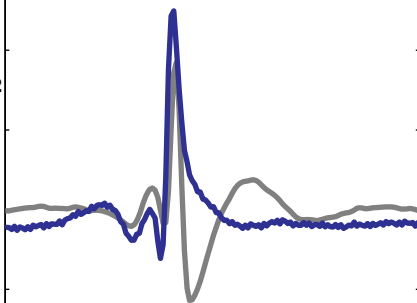

HP/PV

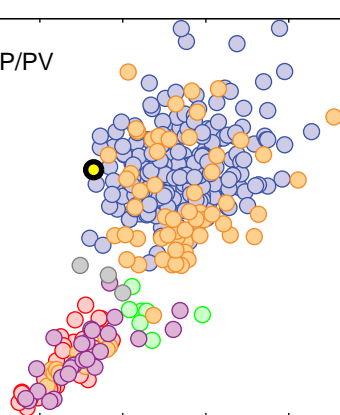

FR/PV

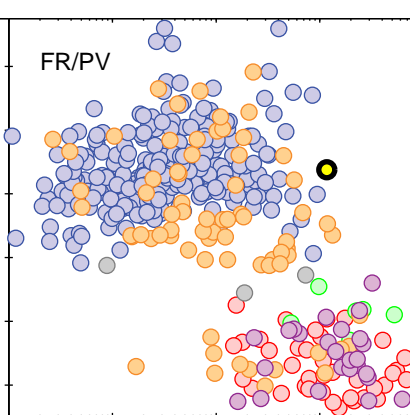

ISI Histogram [1423]

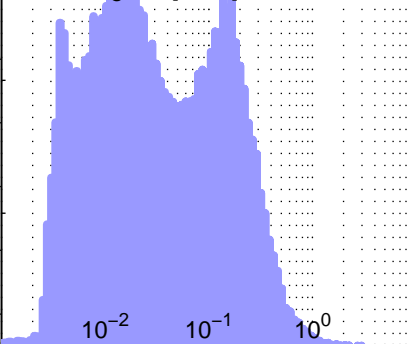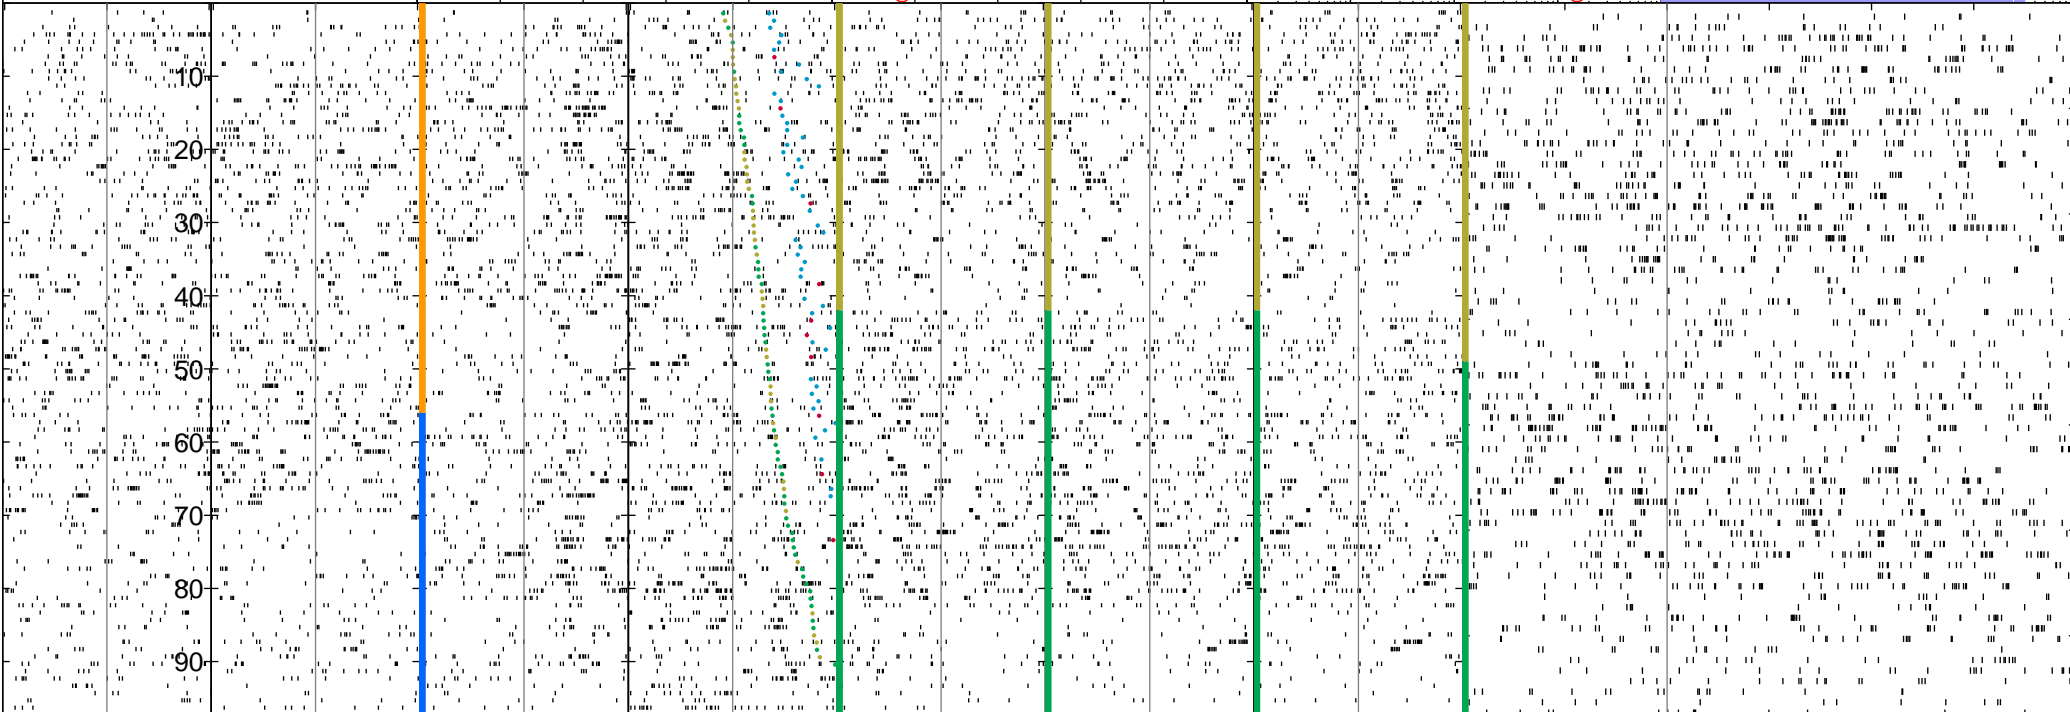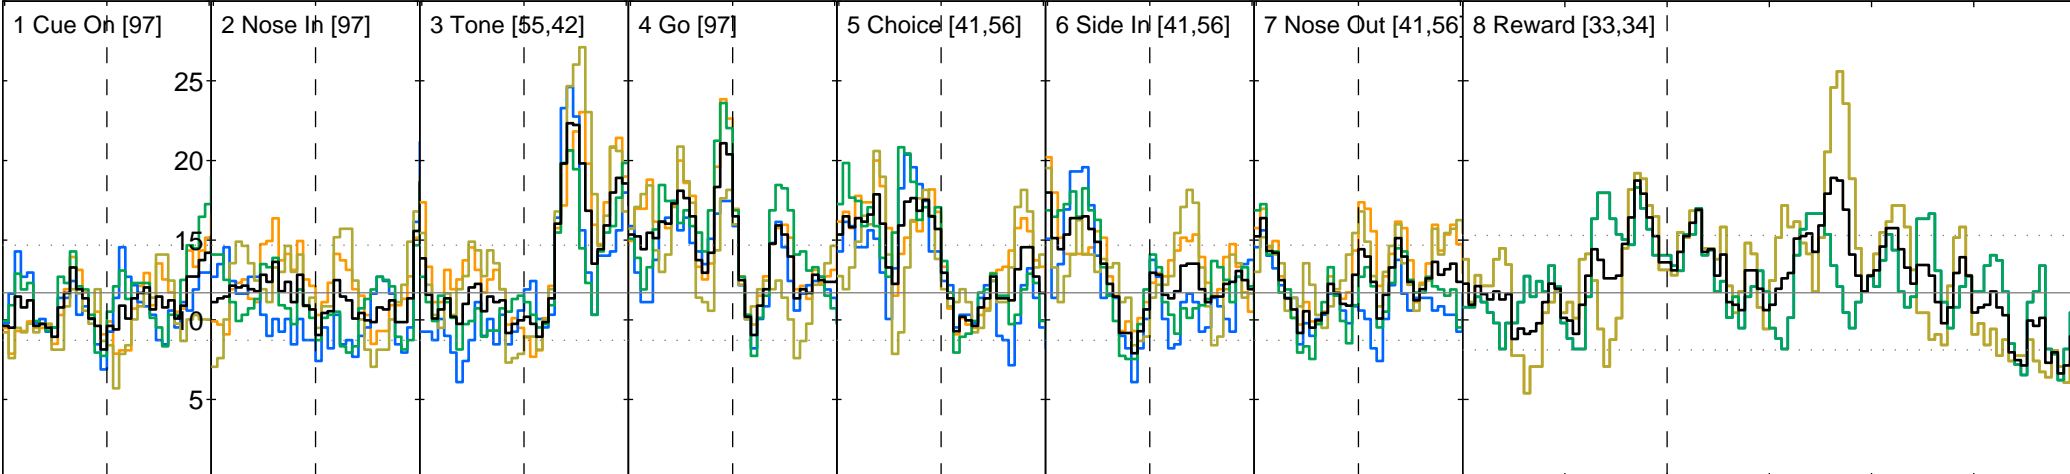

**Cell: C0320070630T07b**

AP: 0.96 ML: 3.6 DV: 7.5

w: 4 n: 6899  $P_{ISI>2}$ : 0.181/2pw: 326 $\mu$ s p->v: 758 $\mu$ s $\beta_T$ : 2.6  $\beta_D$ : -2.8 $\beta_P$ : -2.1 SI: NaN

Session FR: 2.27 Hz

Pk Ev: 5 - Choice (Contra)

Pk FR: 9.52Hz (-0.78s) **MSN**

Waveform

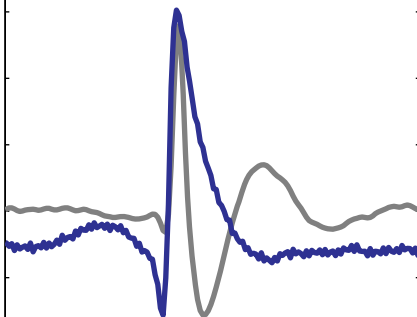

HP/PV

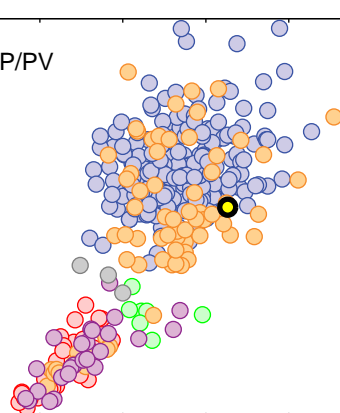

FR/PV

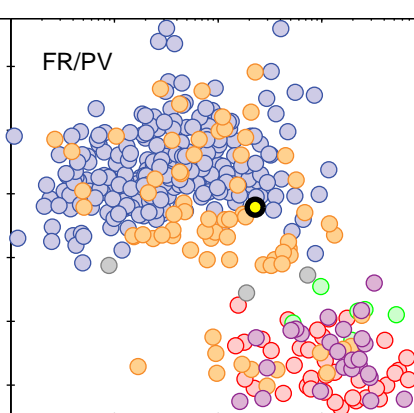

ISI Histogram [214]

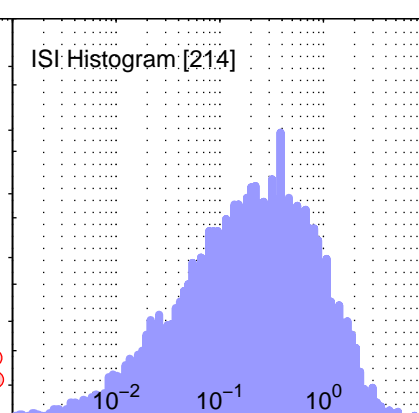

10

20

30

40

50

60

70

80

1 Cue On [82]

2 Nose In [82]

3 Tone [38,44]

4 Go [82]

5 Choice [35,47]

6 Side In [35,47]

7 Nose Out [35,47]

8 Reward [26,35]

8

6

4

2

Cell: C1220071022T11c

AP: -2.8 ML: 4.2 DV: 6.6

w: 1 n: 27790  $P_{ISI>2}$ : 0.29

1/2pw: 427 $\mu$ s p->v: 995 $\mu$ s

$\beta_T$ : -1.8  $\beta_D$ : -3.8

$\beta_P$ : -3.8 SI: -0.81

Session FR: 4.7 Hz

Pk Ev: 5 - Choice (Contra)

Pk FR: 17.3Hz (0.00s) MSN

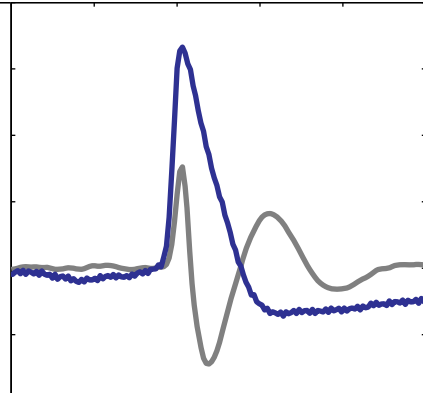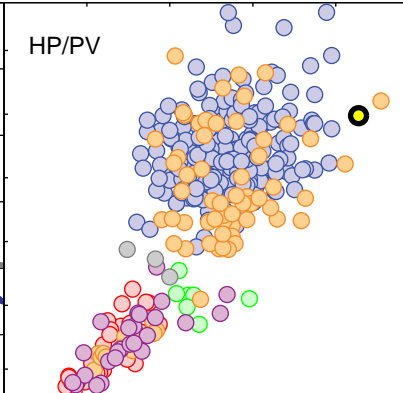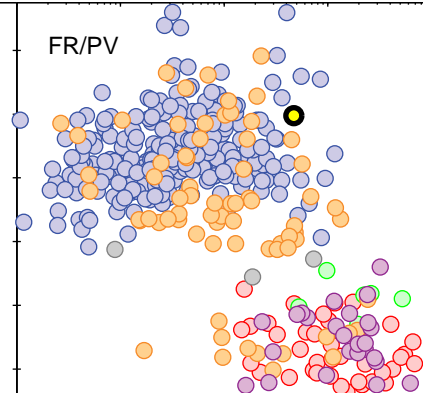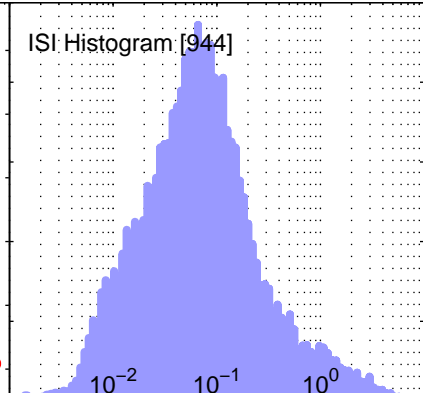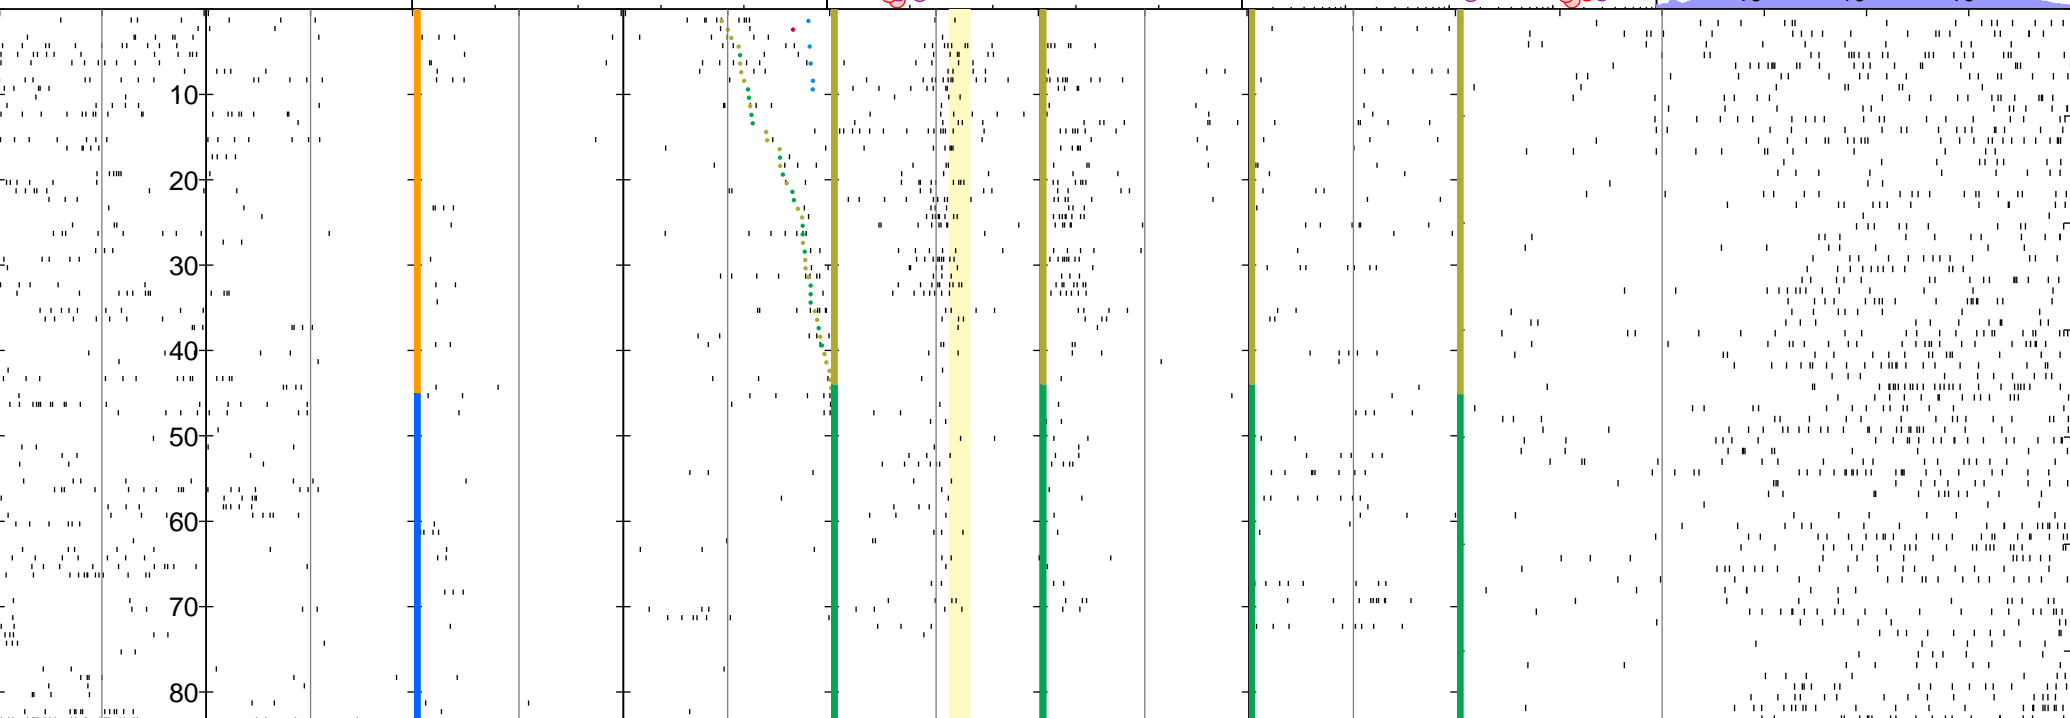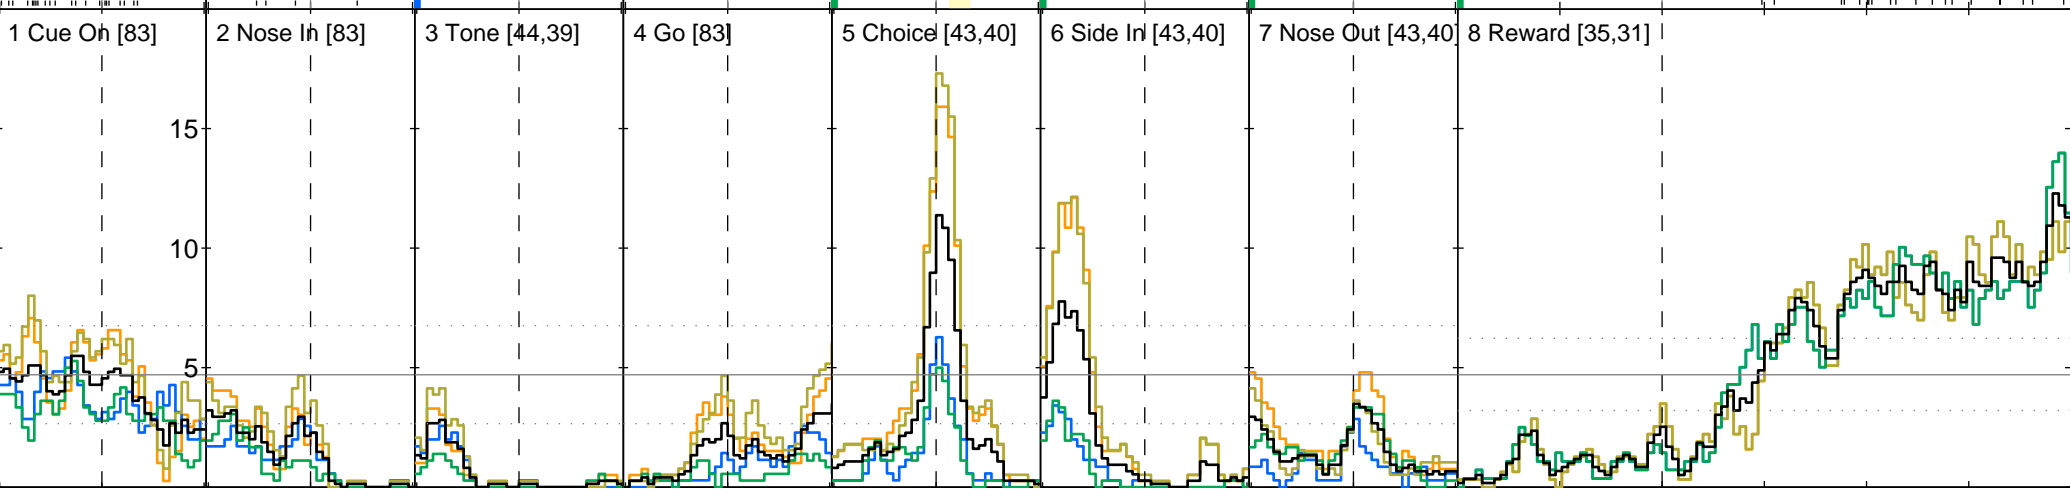



Cell: C0520070406T11c

AP: -0.48 ML: 4.6 DV: 4.5

w: 4 n: 2446  $P_{ISI>2}$ : 0.93

1/2pw: 293 $\mu$ s p->v: 922 $\mu$ s

$\beta_T$ : 1.9  $\beta_D$ : -9.7

$\beta_P$ : -5.7 SI: -0.88

Session FR: 0.564 Hz

Pk Ev: 5 - Choice (Contra)

Pk FR: 37.9Hz (0.03s) **MSN**

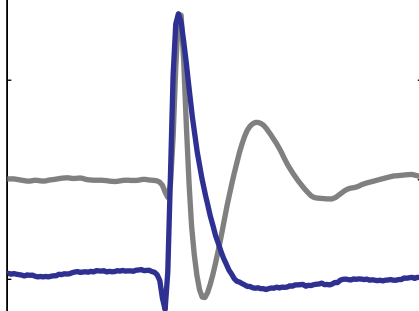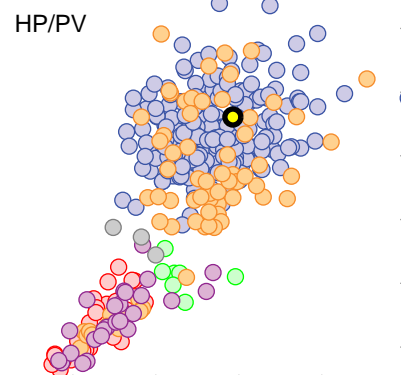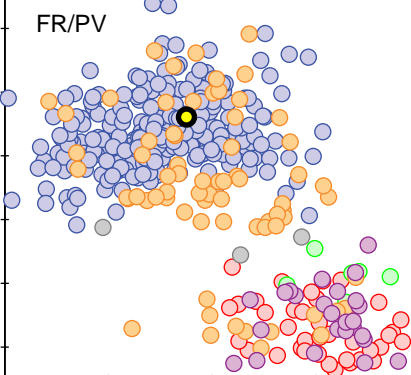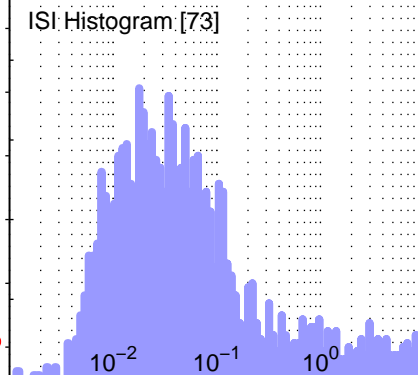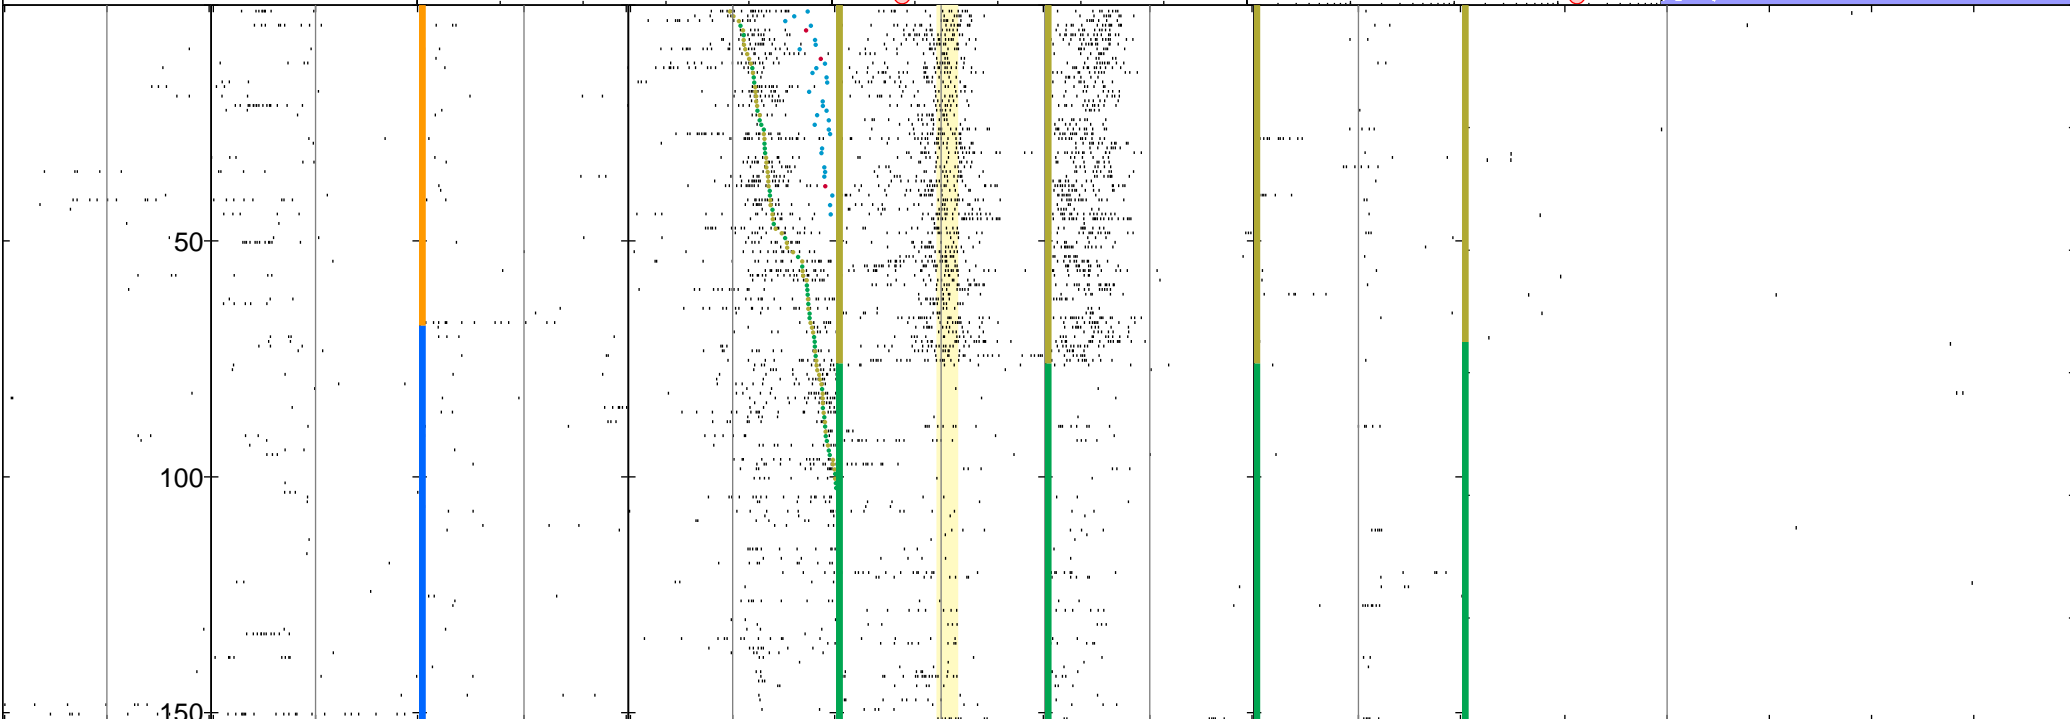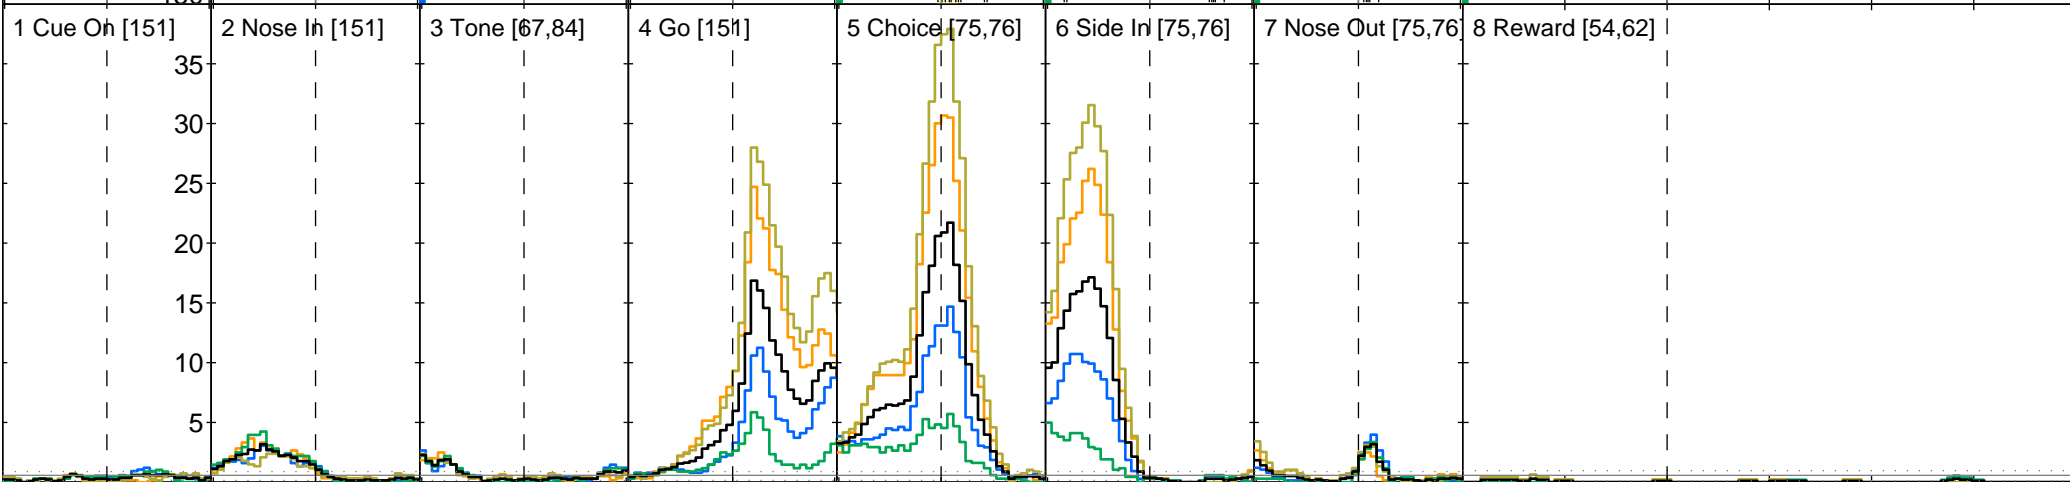

Cell: C0320070621T07d

AP: 0.96 ML: 3.6 DV: 6

w: 4 n: 4353  $P_{ISI>2}$ : 0.77

1/2pw: 302 $\mu$ s p->v: 861 $\mu$ s

$\beta_T$ : 3.9  $\beta_D$ : -9.2

$\beta_P$ : 2.1 SI: -1

Session FR: 1.42 Hz

Pk Ev: 5 - Choice (Contra)

Pk FR: 22Hz (0.09s) **MSN**

Waveform

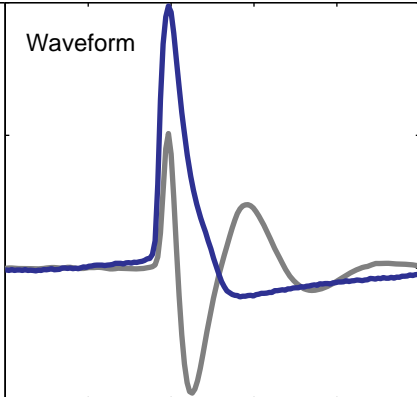

HP/PV

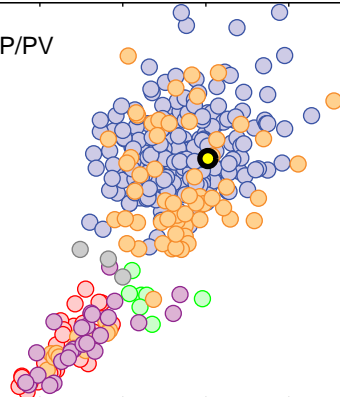

FR/PV

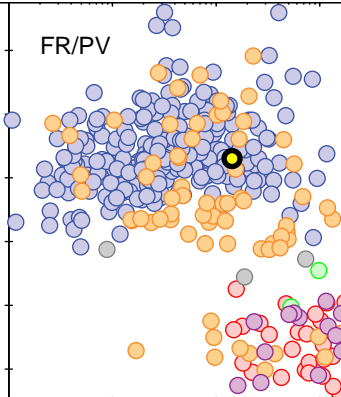

ISI Histogram [137]

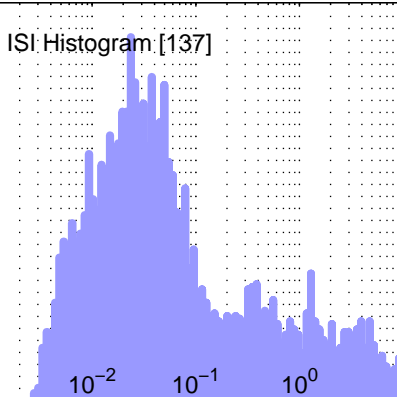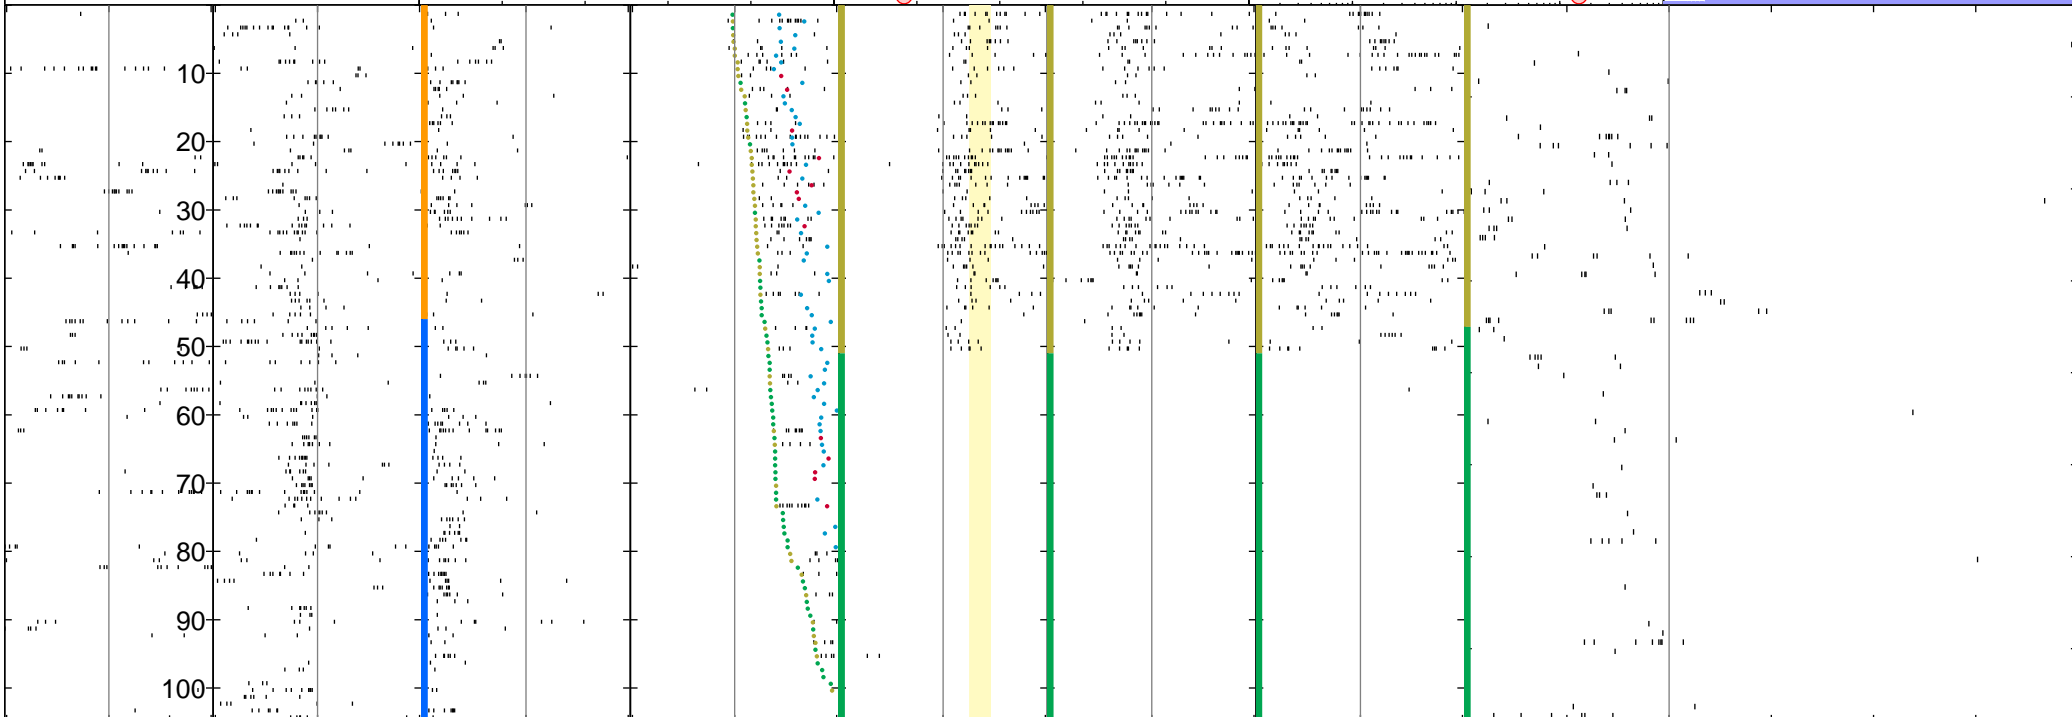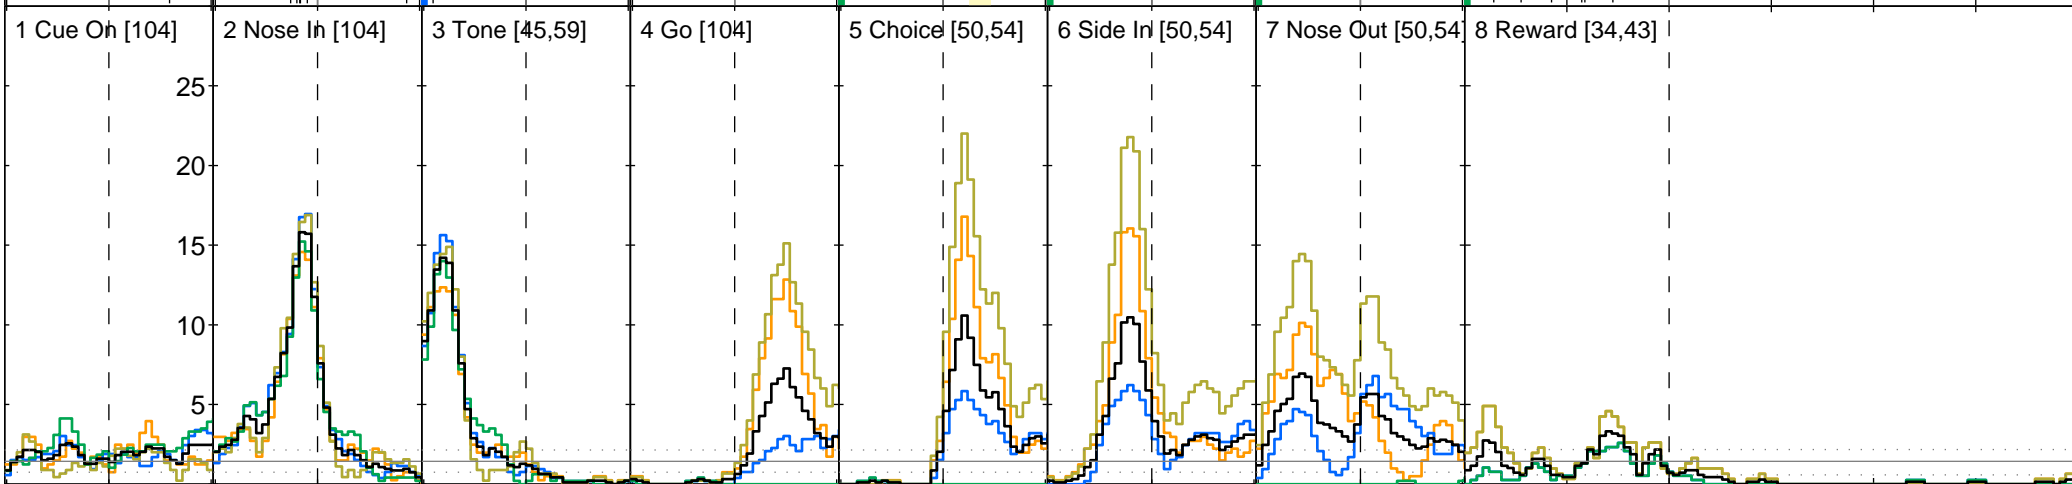

Cell: C0320070703T09b

AP: 1.6 ML: 3.7 DV: 6.6

w: 3 n: 25787  $P_{ISI>2}$ : 0.0012

1/2pw: 208 $\mu$ s p $\rightarrow$ v: 720 $\mu$ s

$\beta_T$ : -2.7  $\beta_D$ : 2.1

$\beta_P$ : -2.7 SI: -0.33

Session FR: 6.61 Hz

Pk Ev: 5 - Choice (Tone1)

Pk FR: 11.4Hz (0.21s) MSN

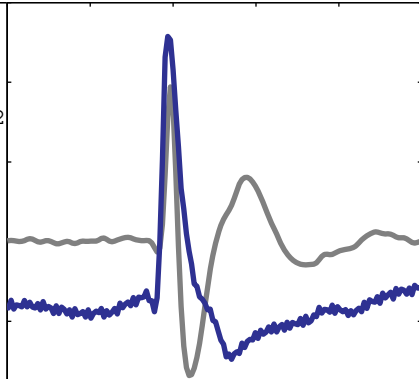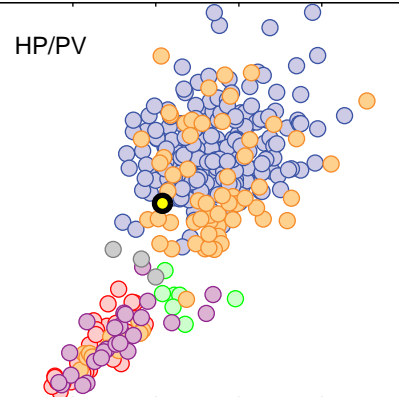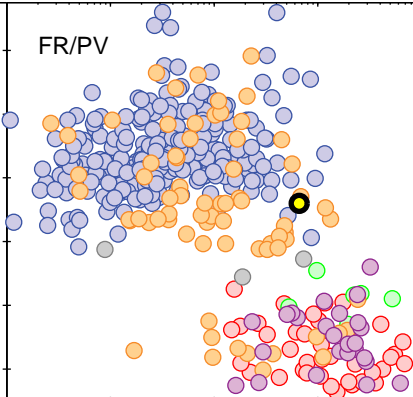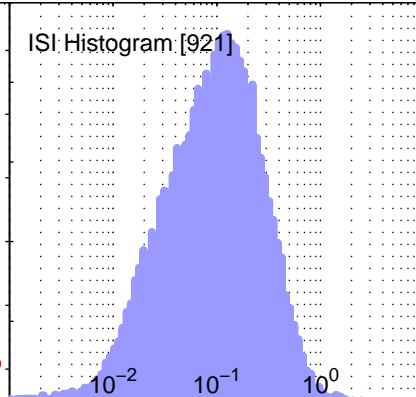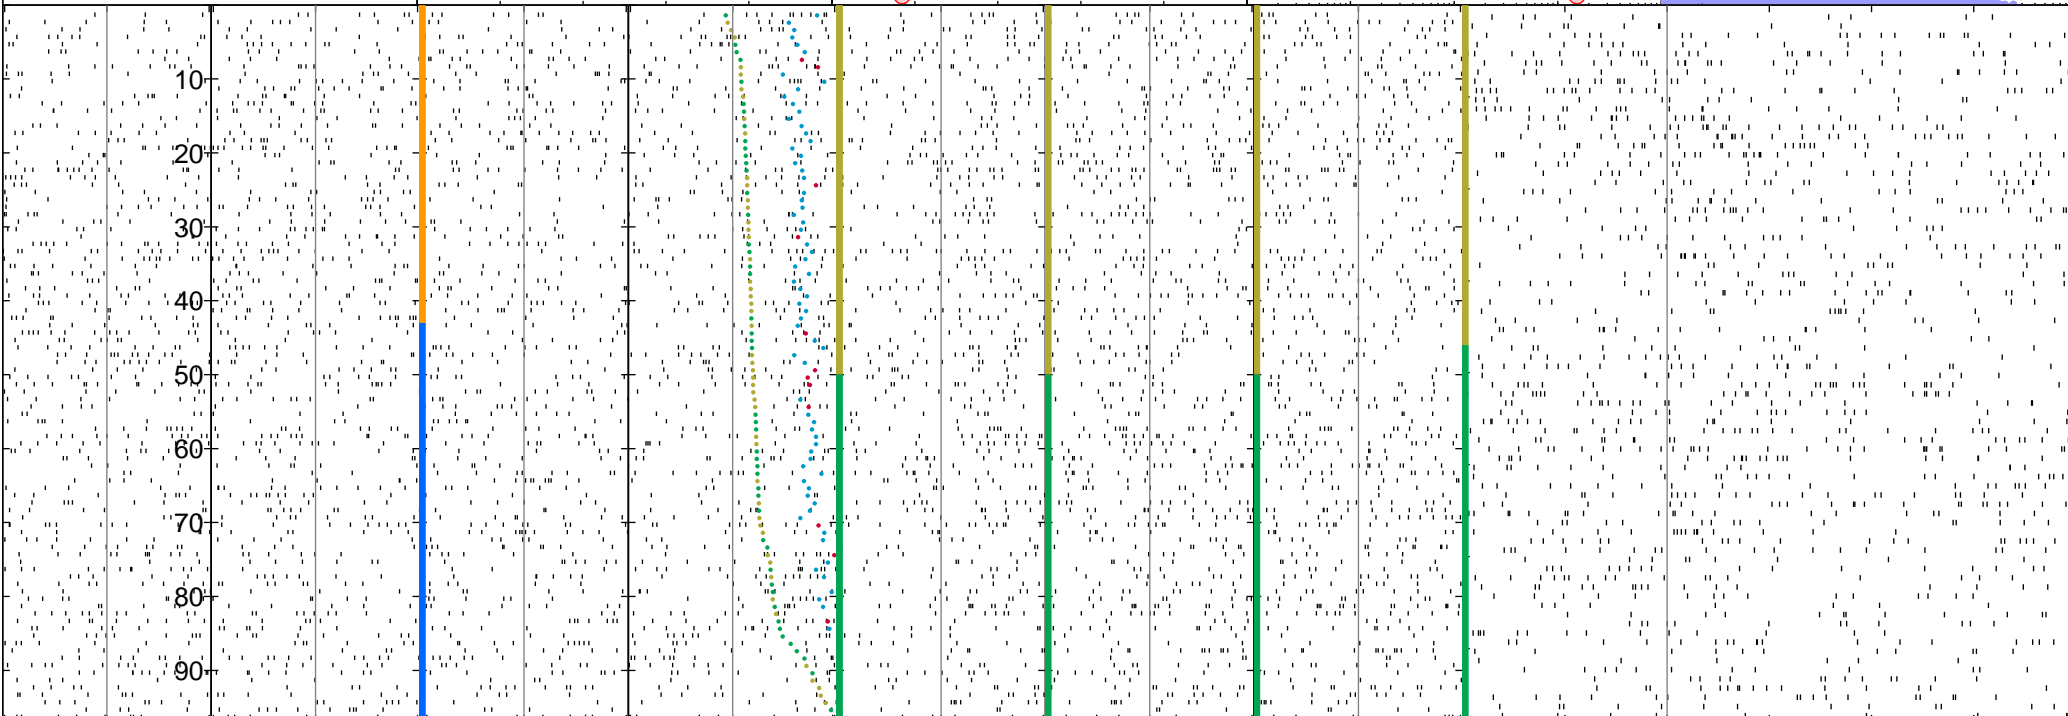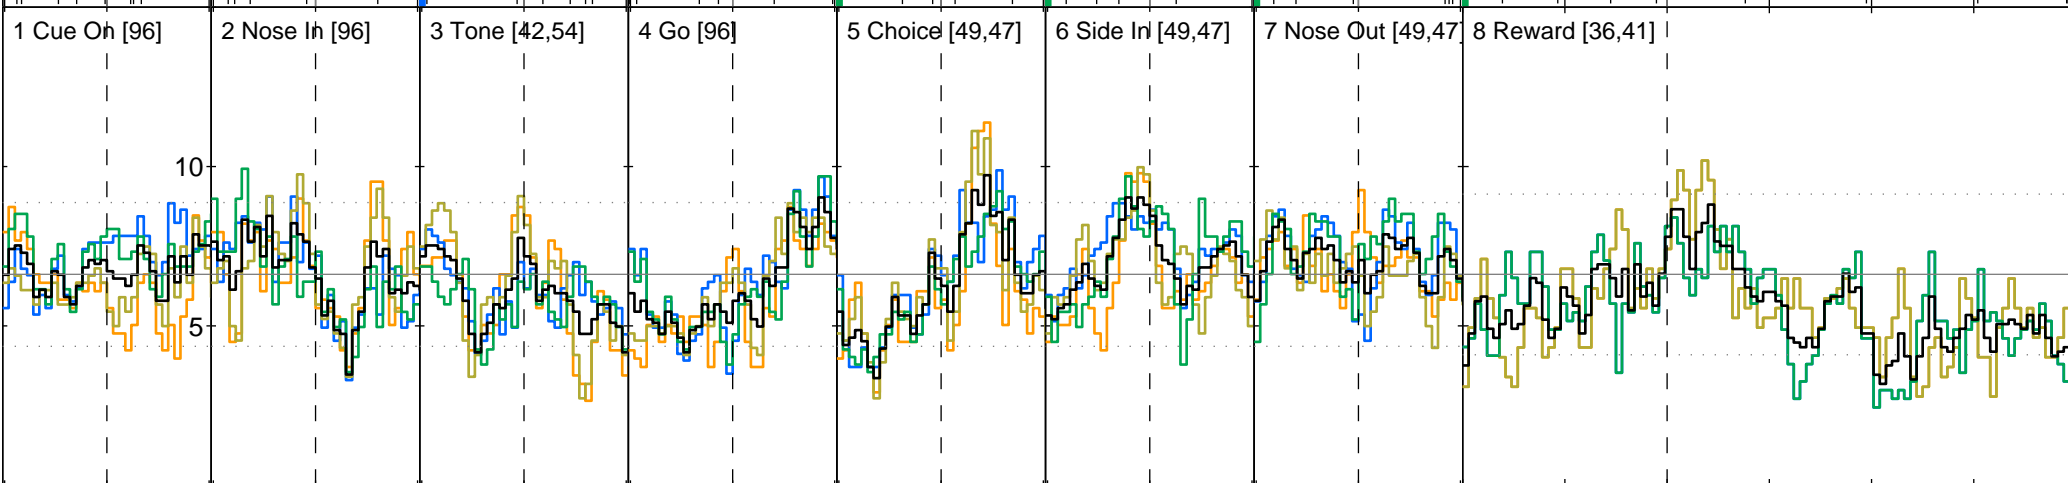

Cell: C0520070402T07b

AP: 1.3 ML: 3.4 DV: 3.4

w: 3 n: 8986  $P_{ISI>2}$ : 0.47

1/2pw: 392 $\mu$ s p $\rightarrow$ v: 846 $\mu$ s

$\beta_T$ : 3.3  $\beta_D$ : -7

$\beta_P$ : 3.1 SI: -0.96

Session FR: 1.97 Hz

Pk Ev: 5 - Choice (Contra)

Pk FR: 14.6Hz (0.24s) **MSN**

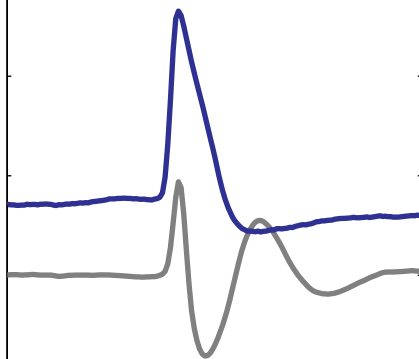

HP/PV

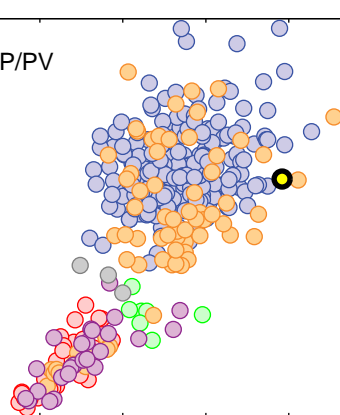

FR/PV

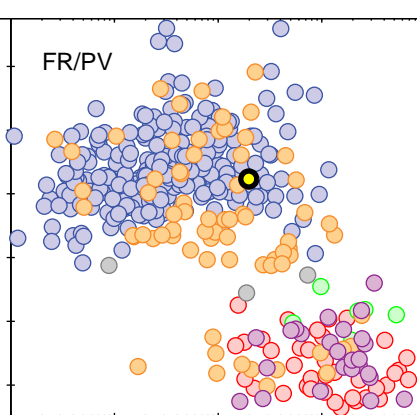

ISI Histogram [173]

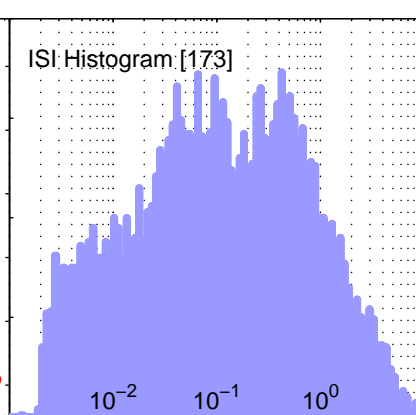

20

40

60

80

100

120

140

160

1 Cue On [177]

2 Nose In [177]

3 Tone [84,93]

4 Go [177]

5 Choice [96,81]

6 Side In [96,81]

7 Nose Out [96,81]

8 Reward [64,62]

10

5

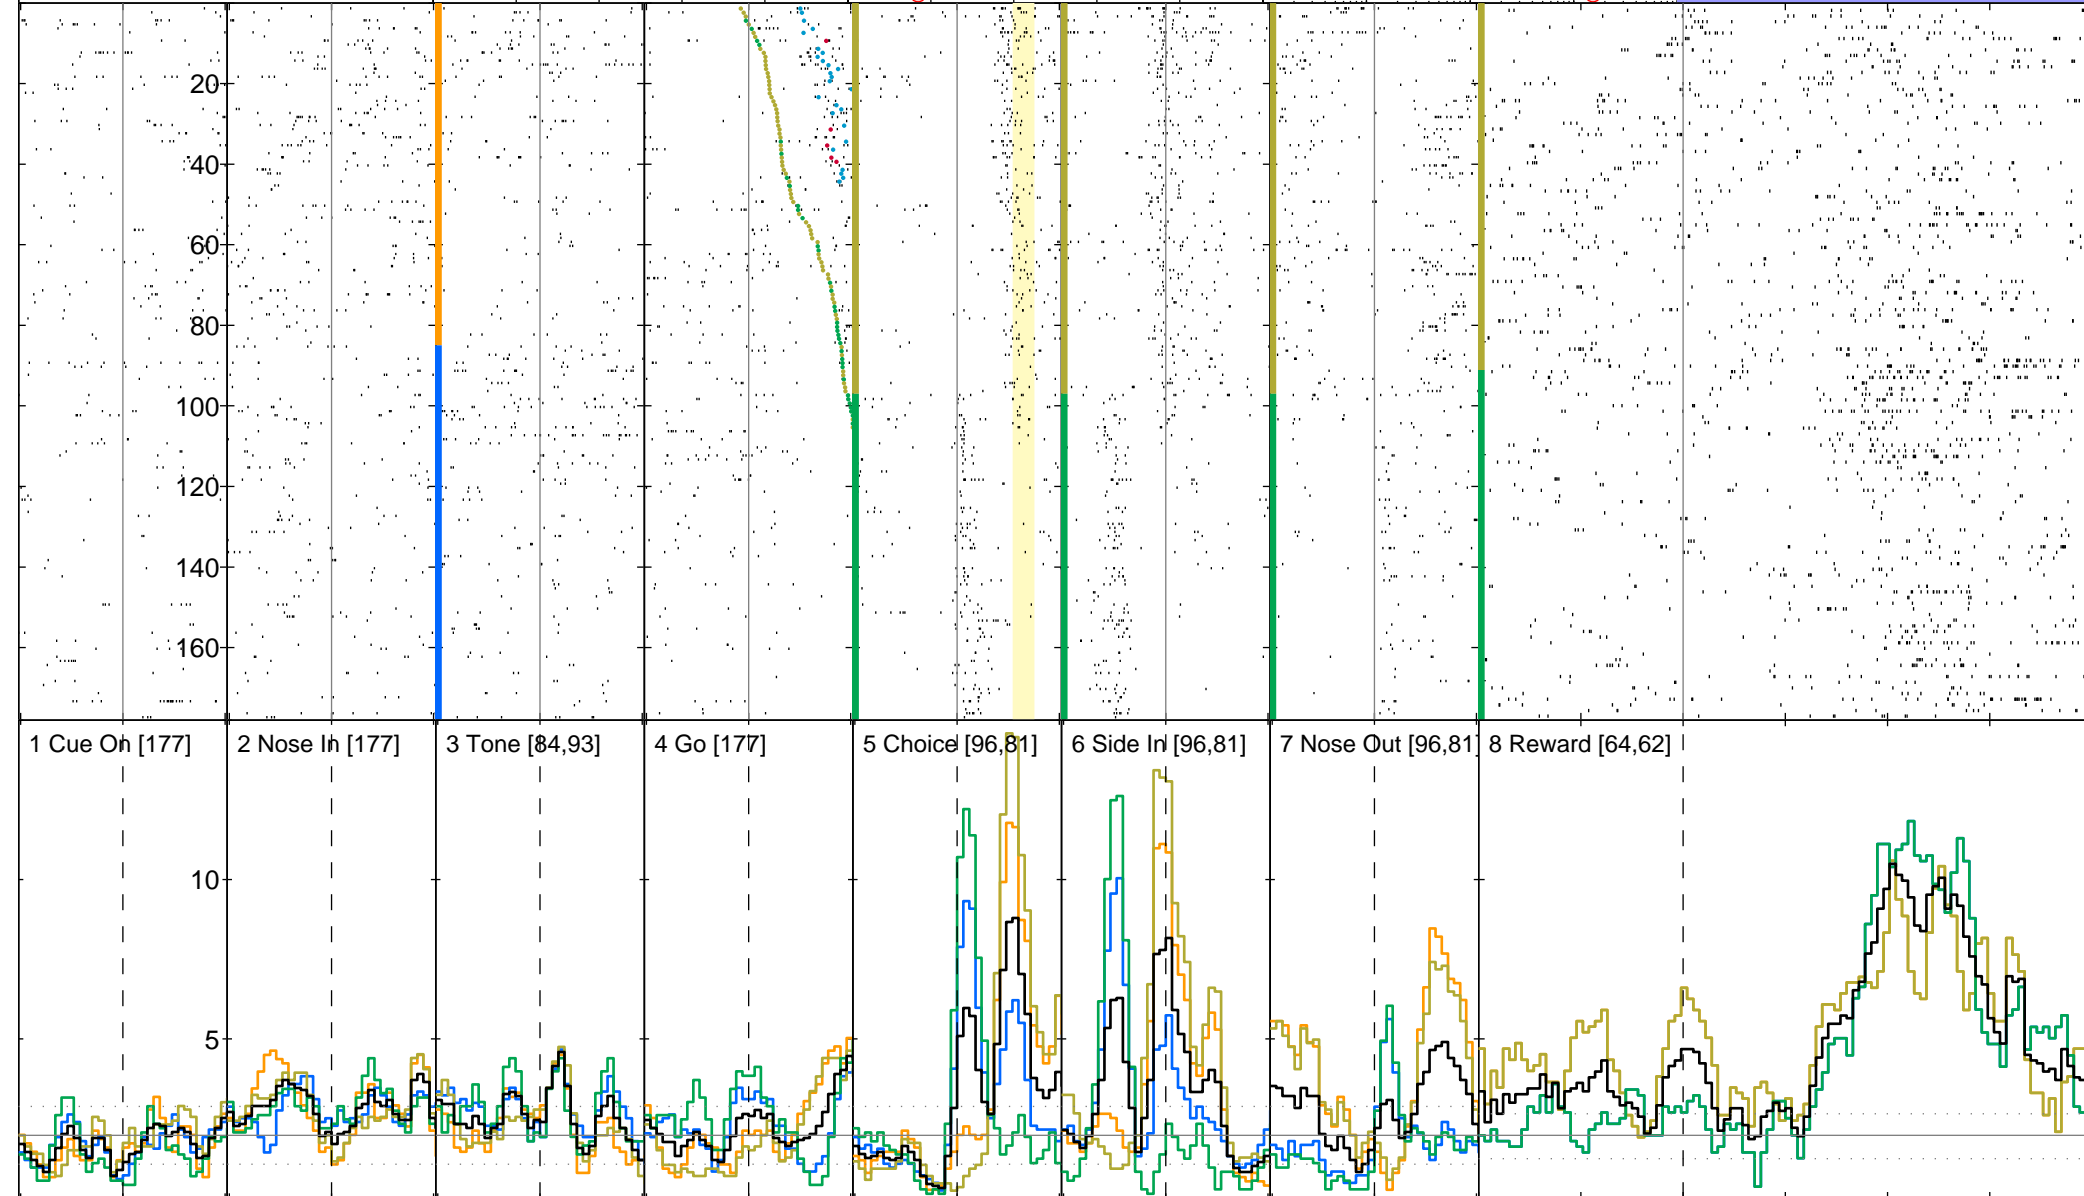

**Cell: C0520070406T05a**

AP: 2.2 ML: 1.2 DV: 7.6

w: 2 n: 17852  $P_{ISI>2}$ : 0.41/2pw: 294 $\mu$ s p $\rightarrow$ v: 846 $\mu$ s $\beta_T$ : -3.3  $\beta_D$ : -4.7 $\beta_P$ : -5.1 SI: 0.46

Session FR: 4.09 Hz

Pk Ev: 5 - Choice (Contra)

Pk FR: 24.7Hz (0.24s) **MSN**

Waveform

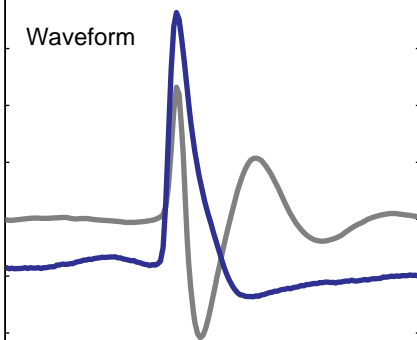

HP/PV

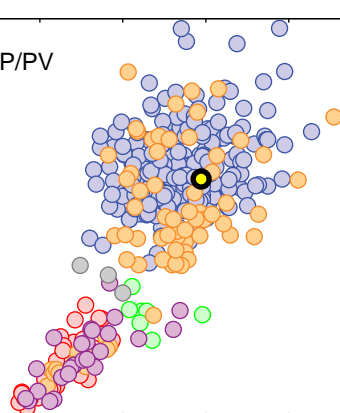

FR/PV

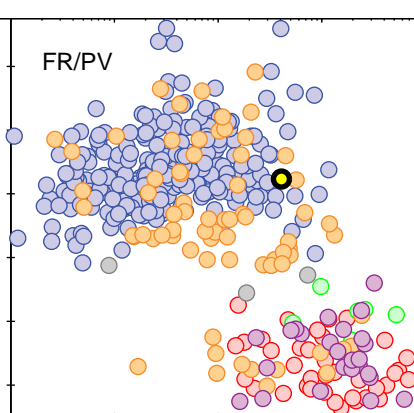

ISI Histogram [702]

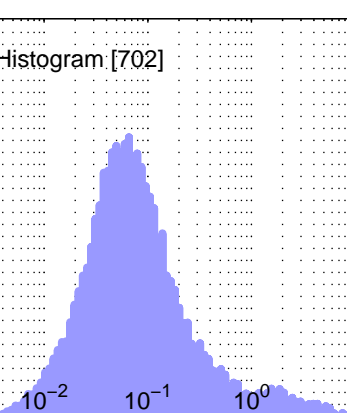

50

100

150

1 Cue On [151]

2 Nose In [151]

3 Tone [67,84]

4 Go [151]

5 Choice [75,76]

6 Side In [75,76]

7 Nose Out [75,76]

8 Reward [54,62]

25

20

15

10

5

0

-5

-10

-15

-20

-25

-30

-35

-40

-45

-50

-55

-60

-65

-70

-75

-80

-85

-90

-95

-100

-105

-110

-115

-120

-125

-130

-135

-140

-145

-150

-155

-160

-165

-170

-175

-180

-185

-190

-195

-200

-205

-210

-215

-220

-225

-230

-235

-240

-245

-250

-255

-260

-265

-270

-275

-280

-285

-290

-295

-300

-305

-310

-315

-320

-325

-330

-335

-340

-345

-350

-355

-360

-365

-370

-375

-380

-385

-390

-395

-400

-405

-410

-415

-420

-425

-430

-435

-440

-445

-450

-455

-460

-465

-470

-475

-480

-485

-490

-495

-500

-505

-510

-515

-520

-525

-530

-535

-540

-545

-550

-555

-560

-565

-570

-575

-580

-585

-590

-595

-600

-605

-610

-615

-620

-625

-630

-635

-640

-645

-650

-655

-660

-665

-670

-675

-680

-685

-690

-695

-700

-705

-710

-715

-720

-725

-730

-735

-740

-745

-750

-755

-760

-765

-770

-775

-780

-785

-790

-795

-800

-805

-810

-815

-820

-825

-830

-835

-840

-845

-850

-855

-860

-865

-870

-875

-880

-885

-890

-895

-900

-905

-910

-915

-920

-925

-930

-935

-940

-945

-950

-955

-960

-965

-970

-975

-980

-985

-990

-995

-1000

-1005

-1010

-1015

-1020

-1025

-1030

-1035

-1040

-1045

-1050

-1055

-1060

-1065

-1070

-1075

-1080

-1085

-1090

-1095

-1100

-1105

-1110

-1115

-1120

-1125

-1130

-1135

-1140

-1145

-1150

-1155

-1160

-1165

-1170

-1175

-1180

-1185

-1190

-1195

-1200

-1205

-1210

-1215

-1220

-1225

-1230

-1235

-1240

-1245

-1250

-1255

-1260

-1265

-1270

-1275

-1280

-1285

-1290

-1295

-1300

-1305

-1310

-1315

-1320

-1325

-1330

-1335

-1340

-1345

-1350

-1355

-1360

-1365

-1370

-1375

-1380

-1385

-1390

-1395

-1400

-1405

-1410

-1415

-1420

-1425

-1430

-1435

-1440

-1445

-1450

-1455

-1460

-1465

-1470

-1475

-1480

-1485

-1490

-1495

-1500

-1505

-1510

-1515

-1520

-1525

-1530

-1535

-1540

-1545

-1550

-1555

-1560

-1565

-1570

-1575

-1580

-1585

-1590

-1595

-1600

-1605

-1610

-1615

-1620

-1625

-1630

-1635

-1640

-1645

-1650

-1655

-1660

-1665

-1670

-1675

-1680

-1685

-1690

-1695

-1700

-1705



**Cell: C1220071022T05a**

AP: 1.4 ML: 2.1 DV: 6.7

w: 1 n: 5187  $P_{ISI>2}$ : 0.871/2pw: 374 $\mu$ s p $\rightarrow$ v: 1061 $\mu$ s $\beta_T$ : 1.7  $\beta_D$ : 3.8 $\beta_P$ : 1.8 SI: 1

Session FR: 0.878 Hz

Pk Ev: 5 - Choice (Ipsi)

Pk FR: 6.67Hz (0.3s) **MSN**

Waveform

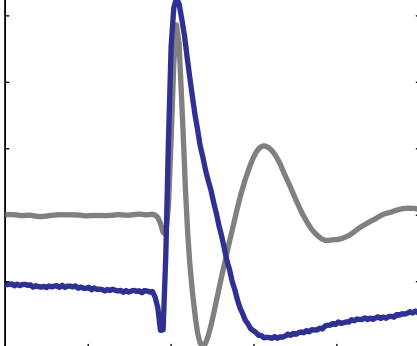

HP/PV

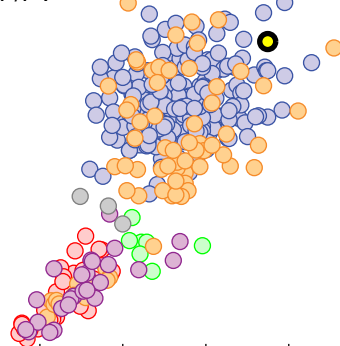

FR/PV

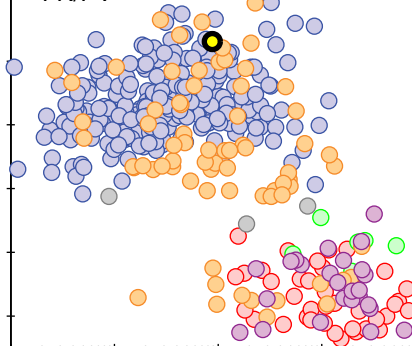

ISI Histogram [125]

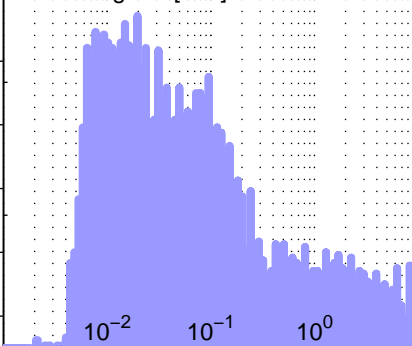10  
20  
30  
40  
50  
60  
70  
80

1 Cue On [83]

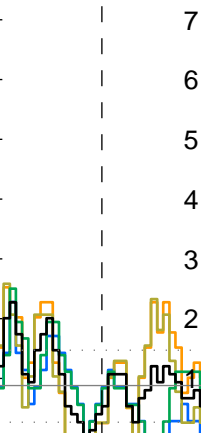

2 Nose In [83]

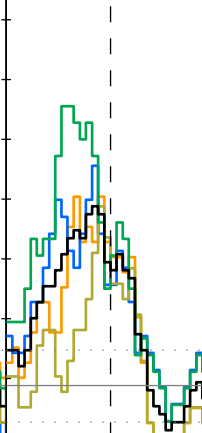

3 Tone [44,39]

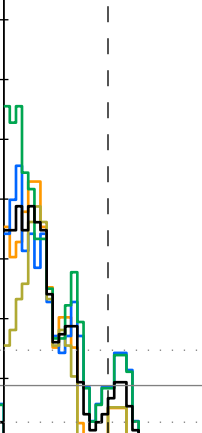

4 Go [83]

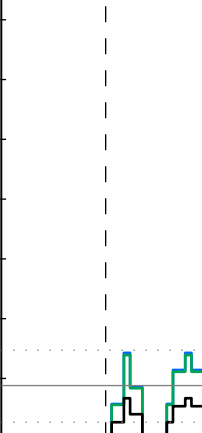

5 Choice [43,40]

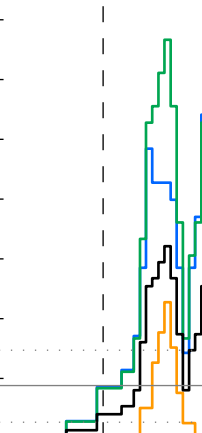

6 Side In [43,40]

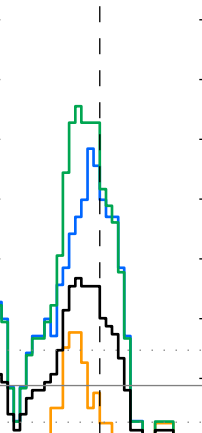

7 Nose Out [43,40]

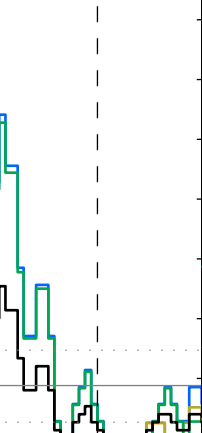

8 Reward [35,31]

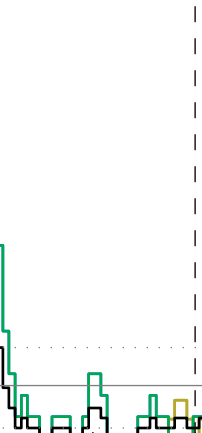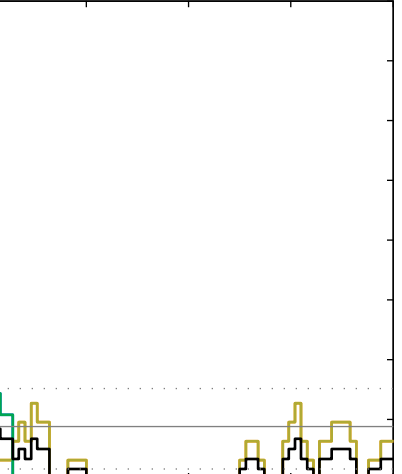

**Cell: C0520070405T06a**

AP: 1.9 ML: 1.5 DV: 8

w: 3 n: 14077  $P_{ISI>2}$ : 0.721/2pw: 274 $\mu$ s p $\rightarrow$ v: 922 $\mu$ s $\beta_T$ : 2.9  $\beta_D$ : 7.7 $\beta_P$ : -5.2 SI: 0.49

Session FR: 3.21 Hz

Pk Ev: 6 - Side In (Ipsi)

Pk FR: 36.9Hz (-0.03s) **MSN**

Waveform

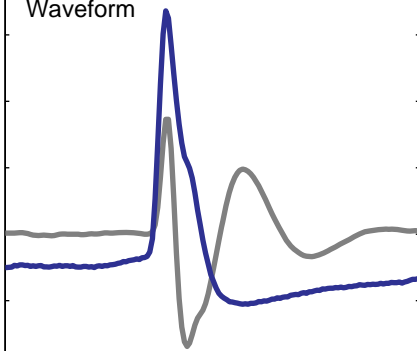

HP/PV

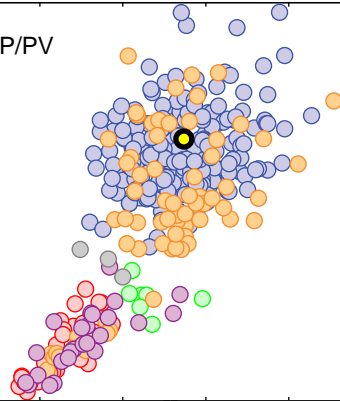

FR/PV

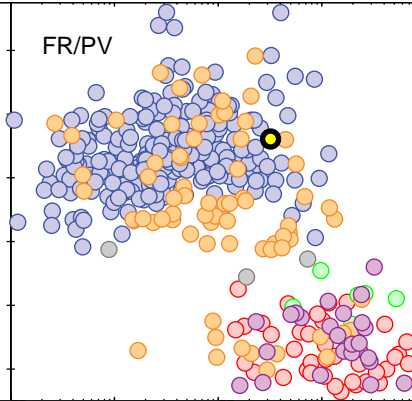

ISI Histogram [481]

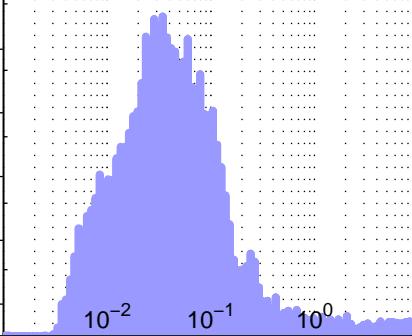

20

40

60

80

100

120

140

160

180

200

1 Cue On [179]

2 Nose In [179]

3 Tone [80,99]

4 Go [179]

5 Choice [80,99]

6 Side In [80,99]

7 Nose Out [80,99]

8 Reward [54,73]

35

30

25

20

15

10

5

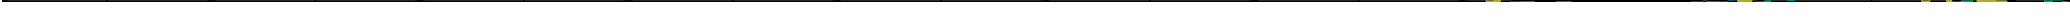

**Cell: C0320070611T09a**

AP: 1.6 ML: 3.7 DV: 4.7

w: 1 n: 19318  $P_{ISI>2}$ : 0.38

1/2pw: 334 $\mu$ s p->v: 861 $\mu$ s

$\beta_T$ : -2.3  $\beta_D$ : 5

$\beta_P$ : -3.6 SI: 0.74

Session FR: 2.58 Hz

Pk Ev: 6 - Side In (Ipsi)

Pk FR: 11.6Hz (0.00s) **MSN**

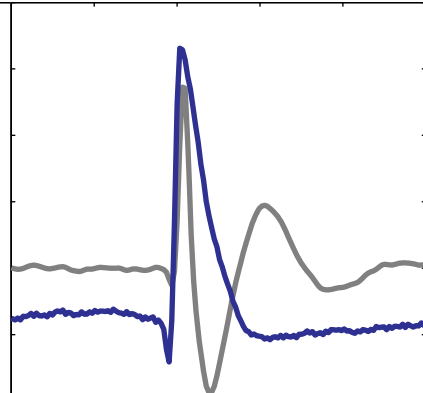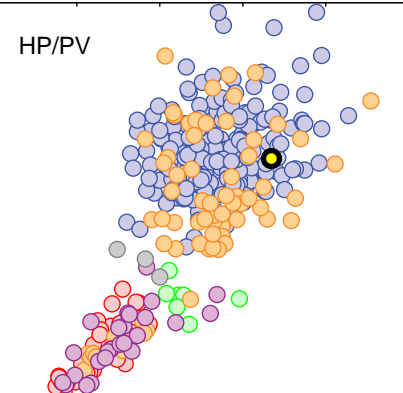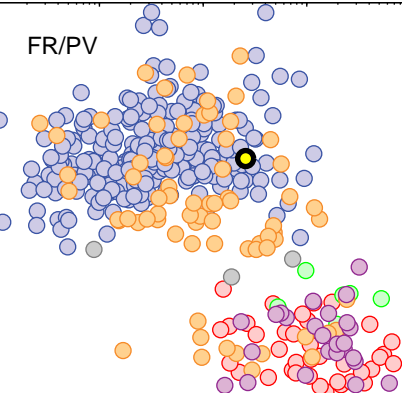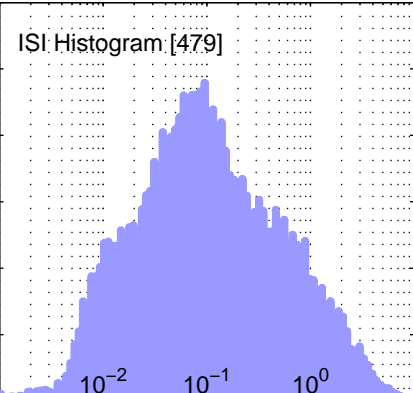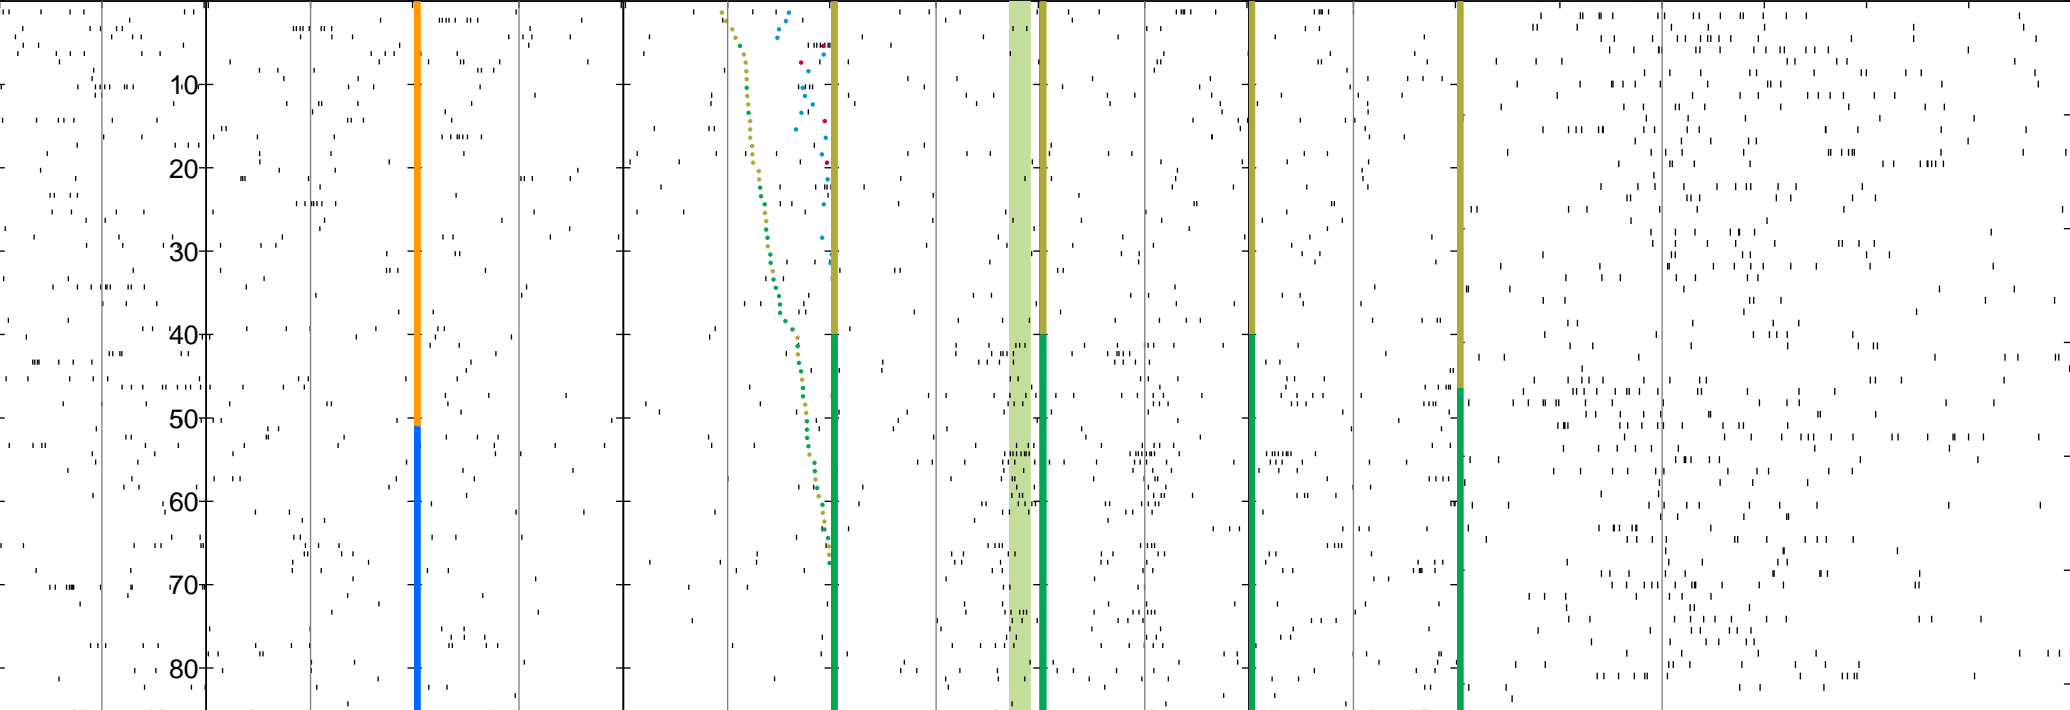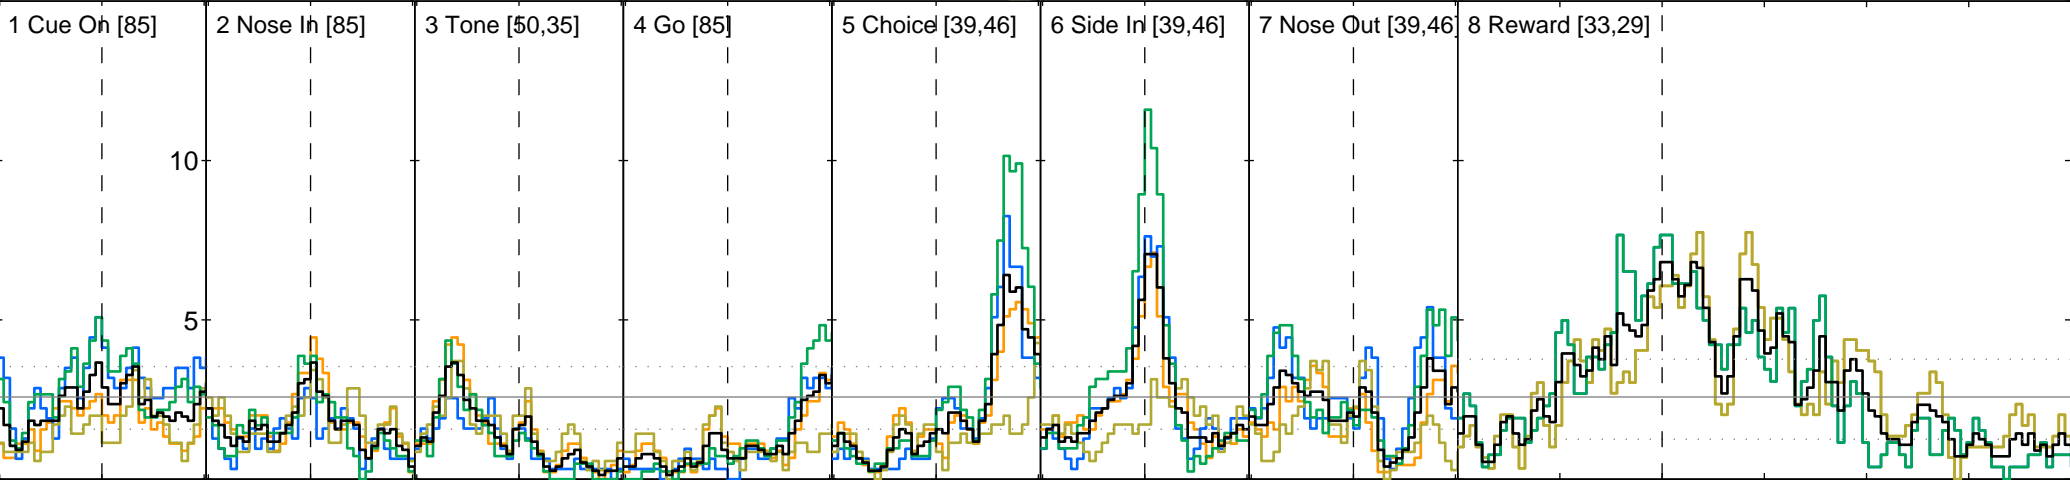

**Cell: C0420070310T05b**

AP: 2.5 ML: 1.3 DV: 6.4  
w: 2 n: 5106  $P_{ISI>2}$ : 0.67  
1/2pw: 314 $\mu$ s p->v: 974 $\mu$ s  
 $\beta_T$ : NaN  $\beta_D$ : NaN  
 $\beta_P$ : NaN SI: -0.71  
Session FR: 1.13 Hz  
Pk Ev: 6 - Side In (Contra)  
Pk FR: 6.06Hz (0.06s) **MSN**

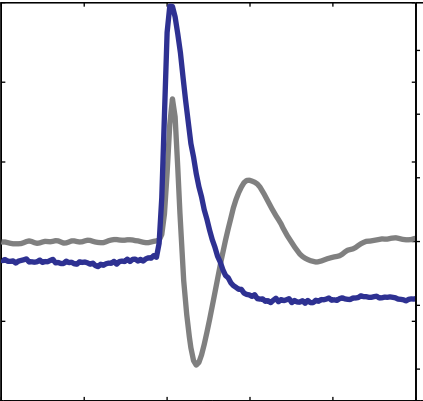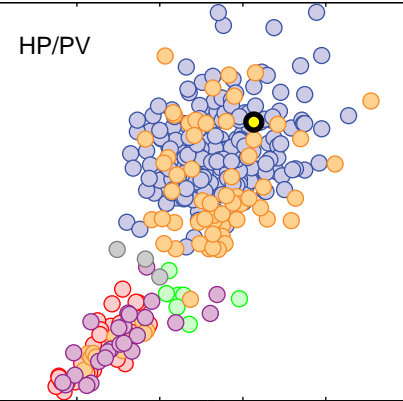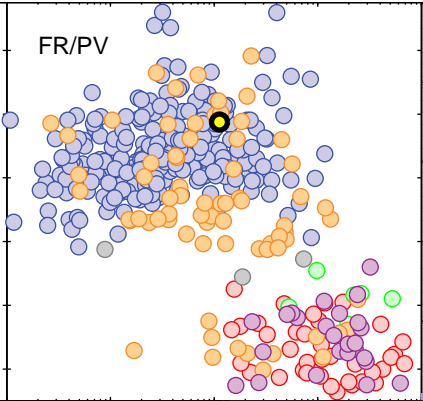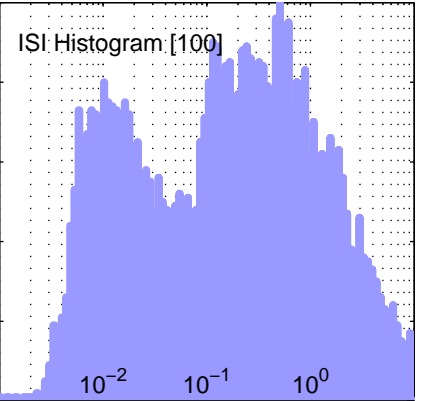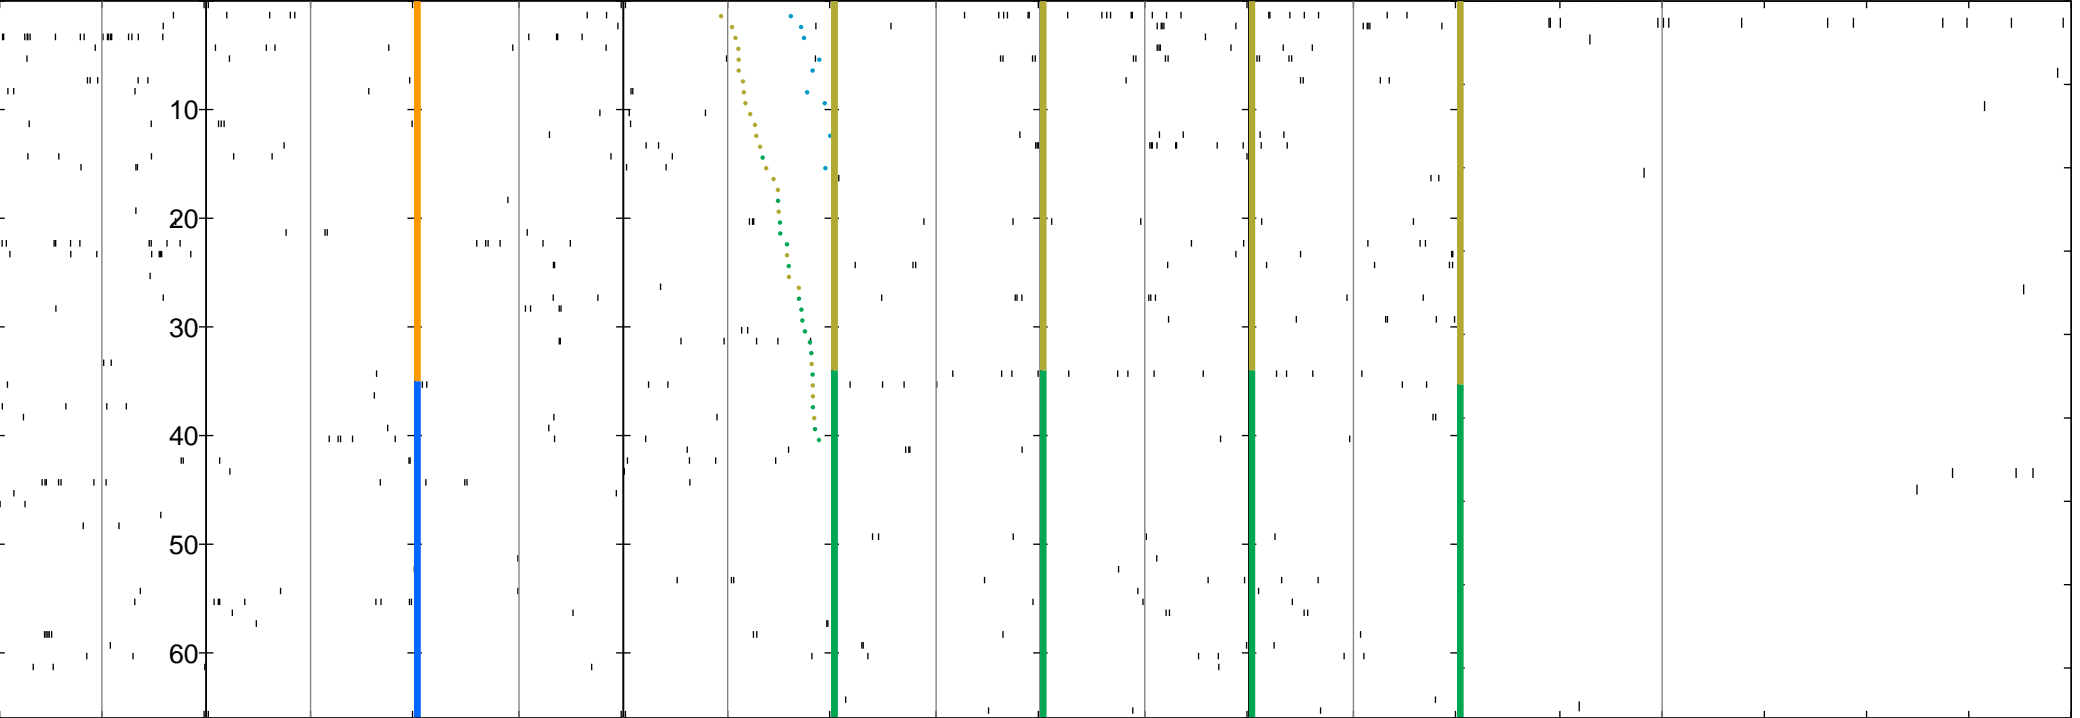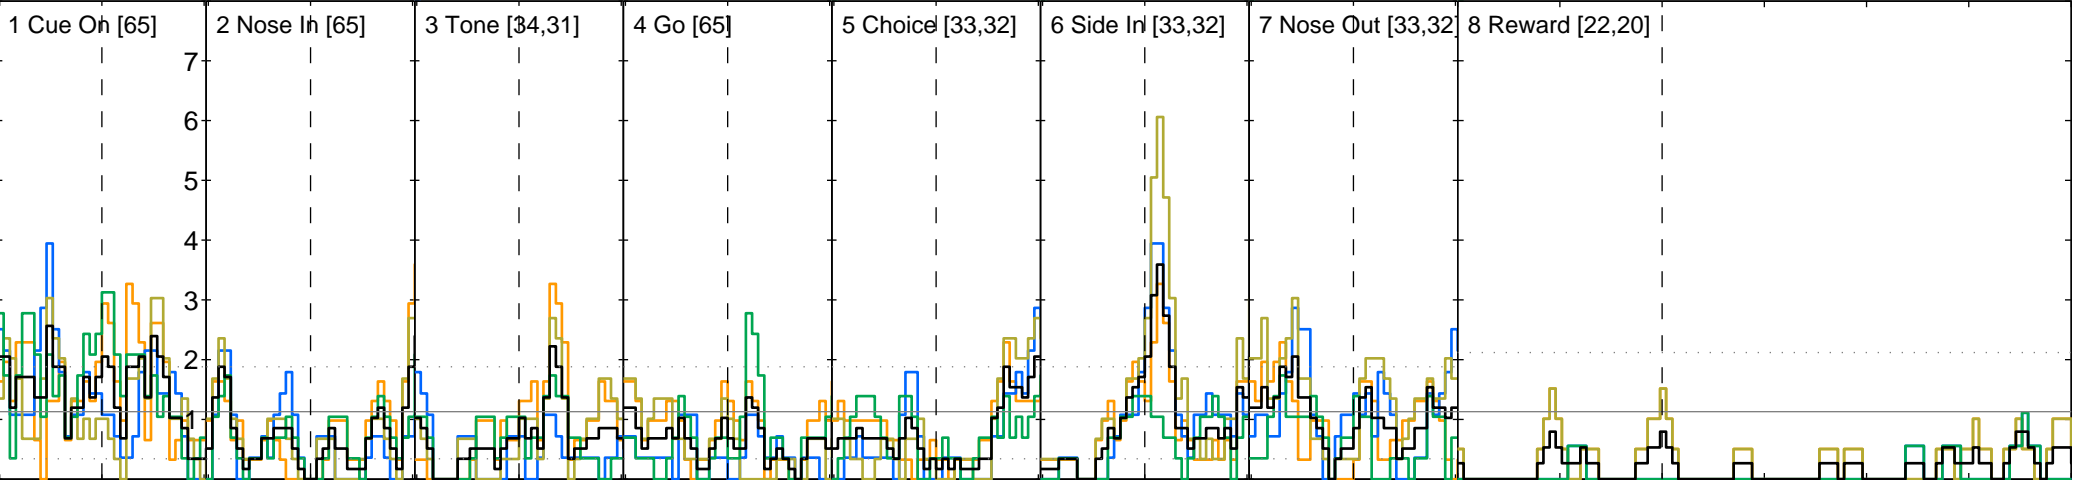

Cell: C0420070226T04a

AP: 2.5 ML: 1.8 DV: 5.7

w: 1 n: 59094  $P_{ISI>2}$ : 0.0014

1/2pw: 254 $\mu$ s p $\rightarrow$ v: 798 $\mu$ s

$\beta_T$ : -2.4  $\beta_D$ : 2.8

$\beta_P$ : 2.5 SI: -0.47

Session FR: 9.47 Hz

Pk Ev: 6 - Side In (Tone1)

Pk FR: 20.9Hz (0.21s) **MSN**

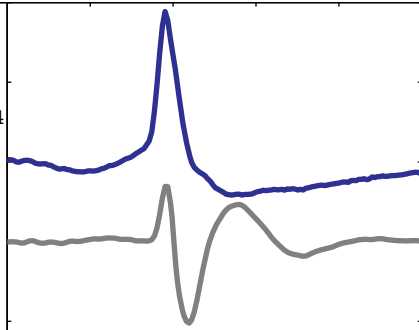

HP/PV

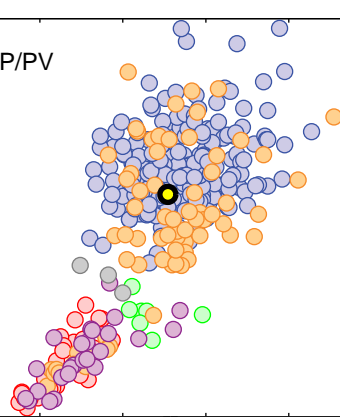

FR/PV

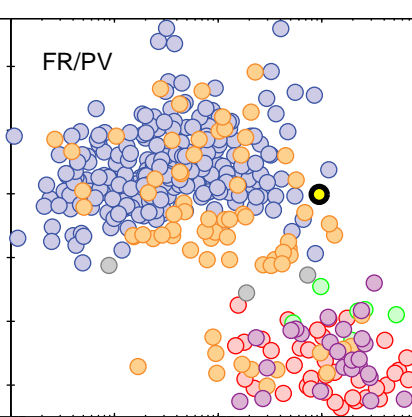

ISI Histogram [1582]

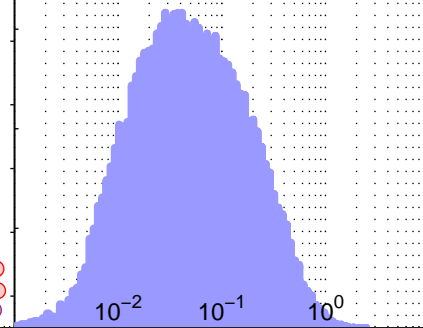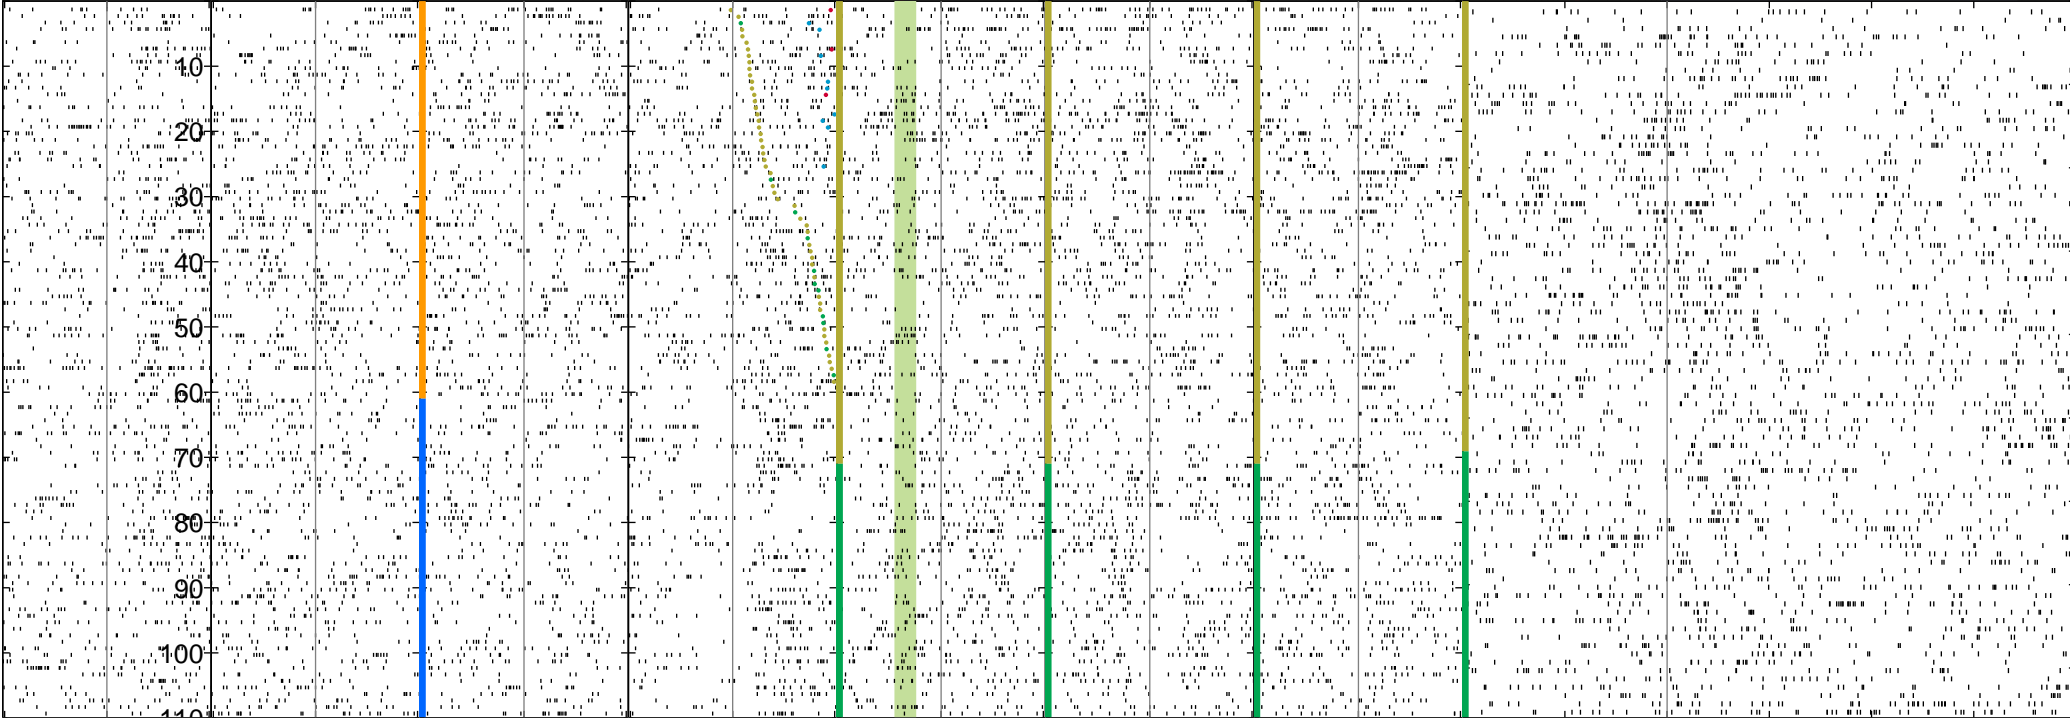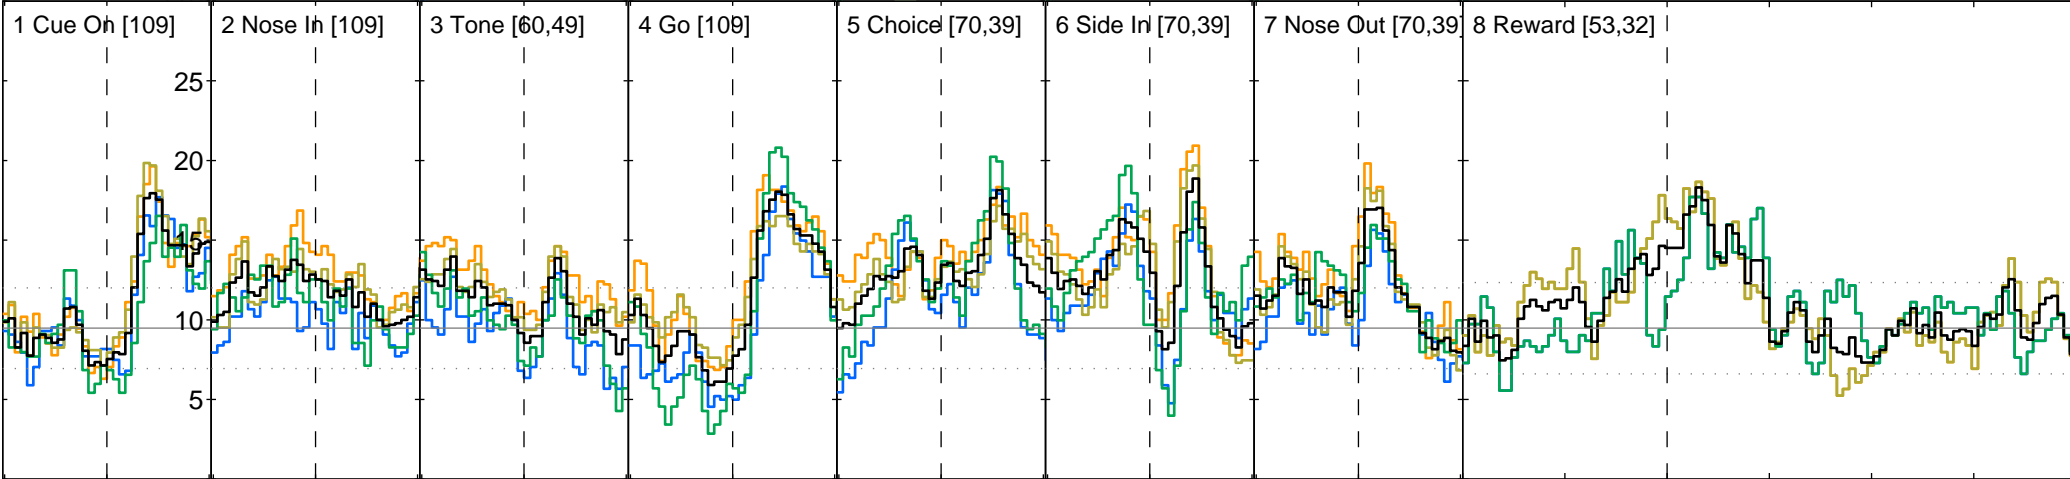



**Cell: C0320070619T09a**

AP: 1.6 ML: 3.7 DV: 5  
w: 1 n: 4286  $P_{ISI>2}$ : 0.68  
1/2pw: 280 $\mu$ s p->v: 891 $\mu$ s  
 $\beta_T$ : -2.7  $\beta_D$ : 4.4  
 $\beta_P$ : -1.6 SI: 0.86  
Session FR: 1.01 Hz  
Pk Ev: 6 - Side In (Ipsi)  
Pk FR: 6.15Hz (0.24s) **MSN**

Waveform

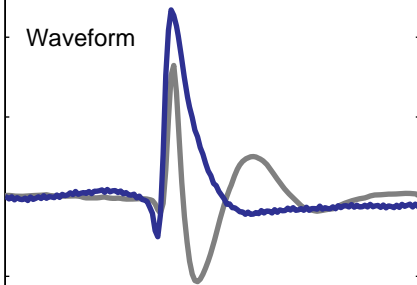

HP/PV

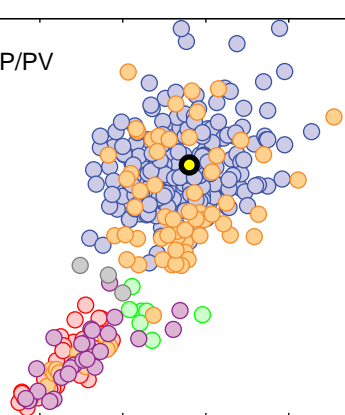

FR/PV

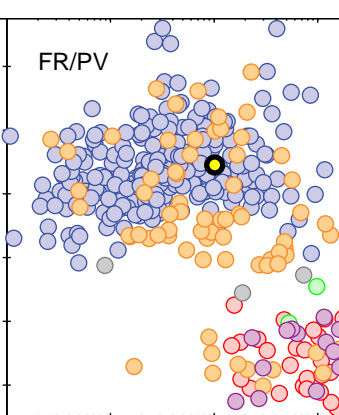

ISI Histogram [105]

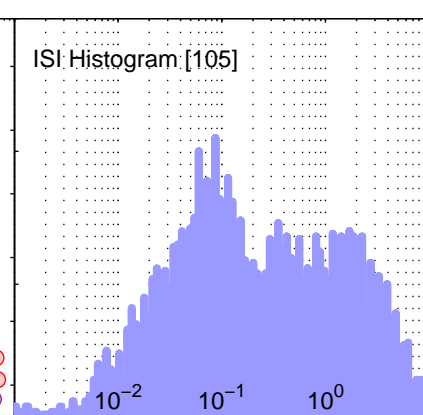

10  
20  
30  
40  
50  
60  
70  
80  
90

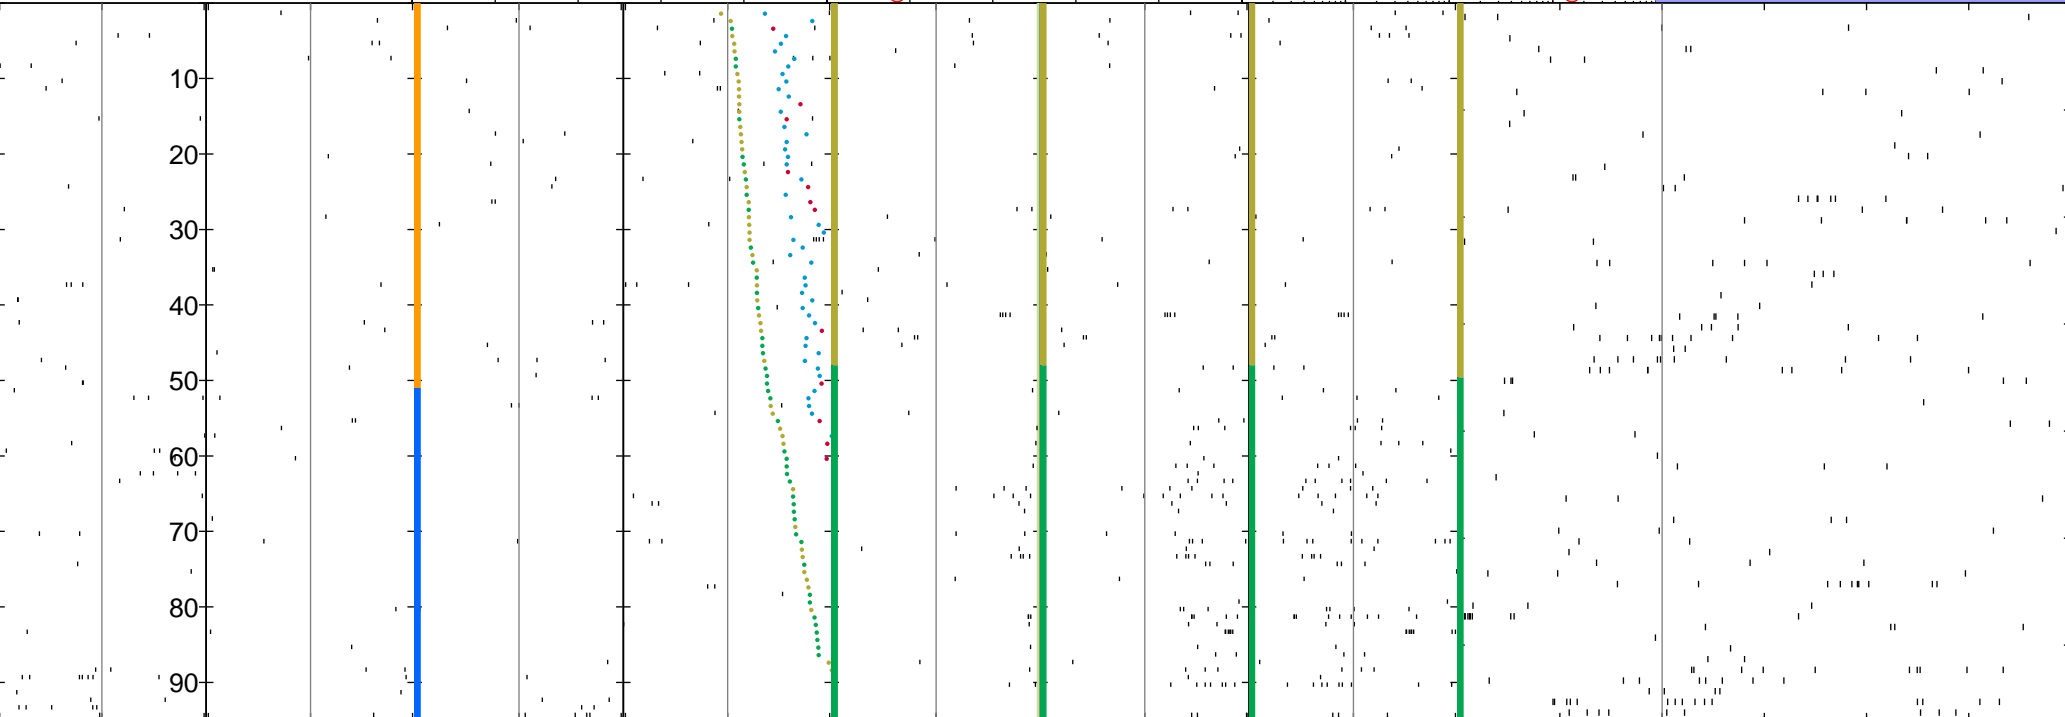

1 Cue On [94] 2 Nose In [94] 3 Tone [50,44] 4 Go [94] 5 Choice [47,47] 6 Side In [47,47] 7 Nose Out [47,47] 8 Reward [34,32]

7  
6  
5  
4  
3  
2  
1

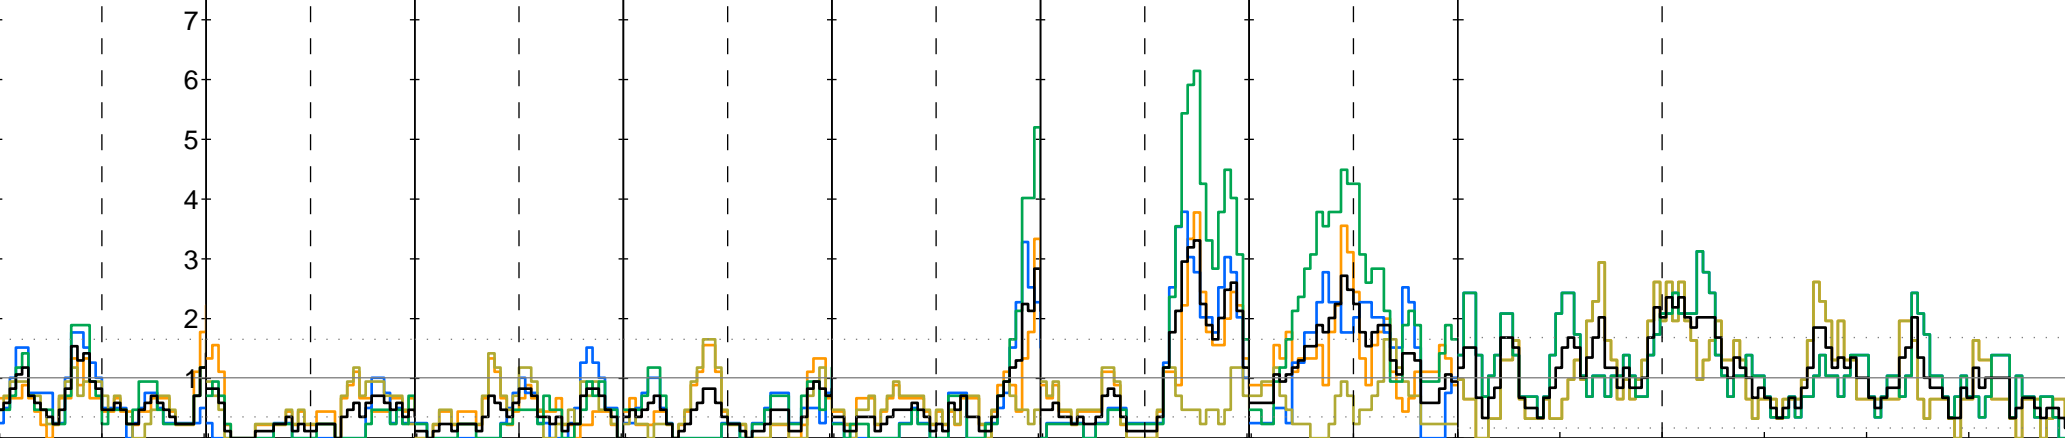

**Cell: C0320070630T06a**

AP: 1.7 ML: 1.3 DV: 7.5

w: 4 n: 2457  $P_{ISI>2}$ : 0.641/2pw: 317 $\mu$ s p->v: 806 $\mu$ s $\beta_T$ : -2.5  $\beta_D$ : -2.9 $\beta_P$ : 3.1 SI: NaN

Session FR: 0.81 Hz

Pk Ev: 6 - Side In (Ipsi)

Pk FR: 7.8Hz (1.14s) **MSN**

Waveform

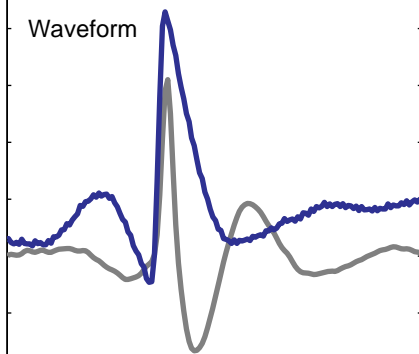

HP/PV

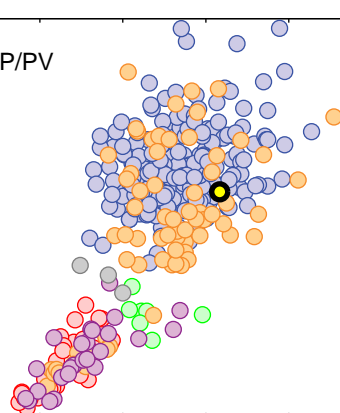

FR/PV

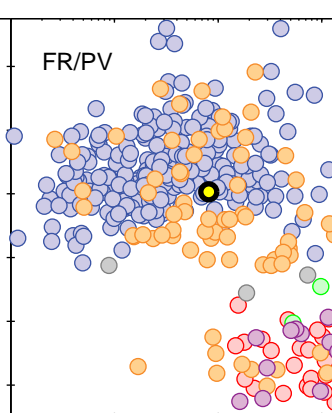

ISI Histogram [77]

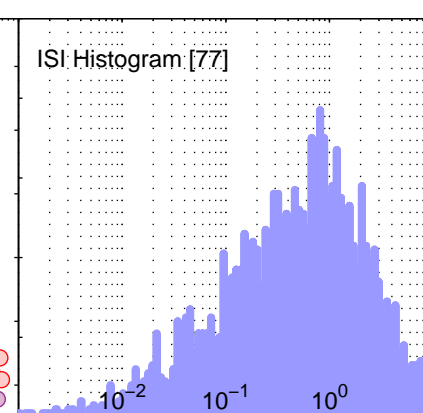

10

20

30

40

50

60

70

80

1 Cue On [82]

2 Nose In [82]

3 Tone [38,44]

4 Go [82]

5 Choice [35,47]

6 Side In [35,47]

7 Nose Out [35,47]

8 Reward [26,35]

7

6

5

4

3

2

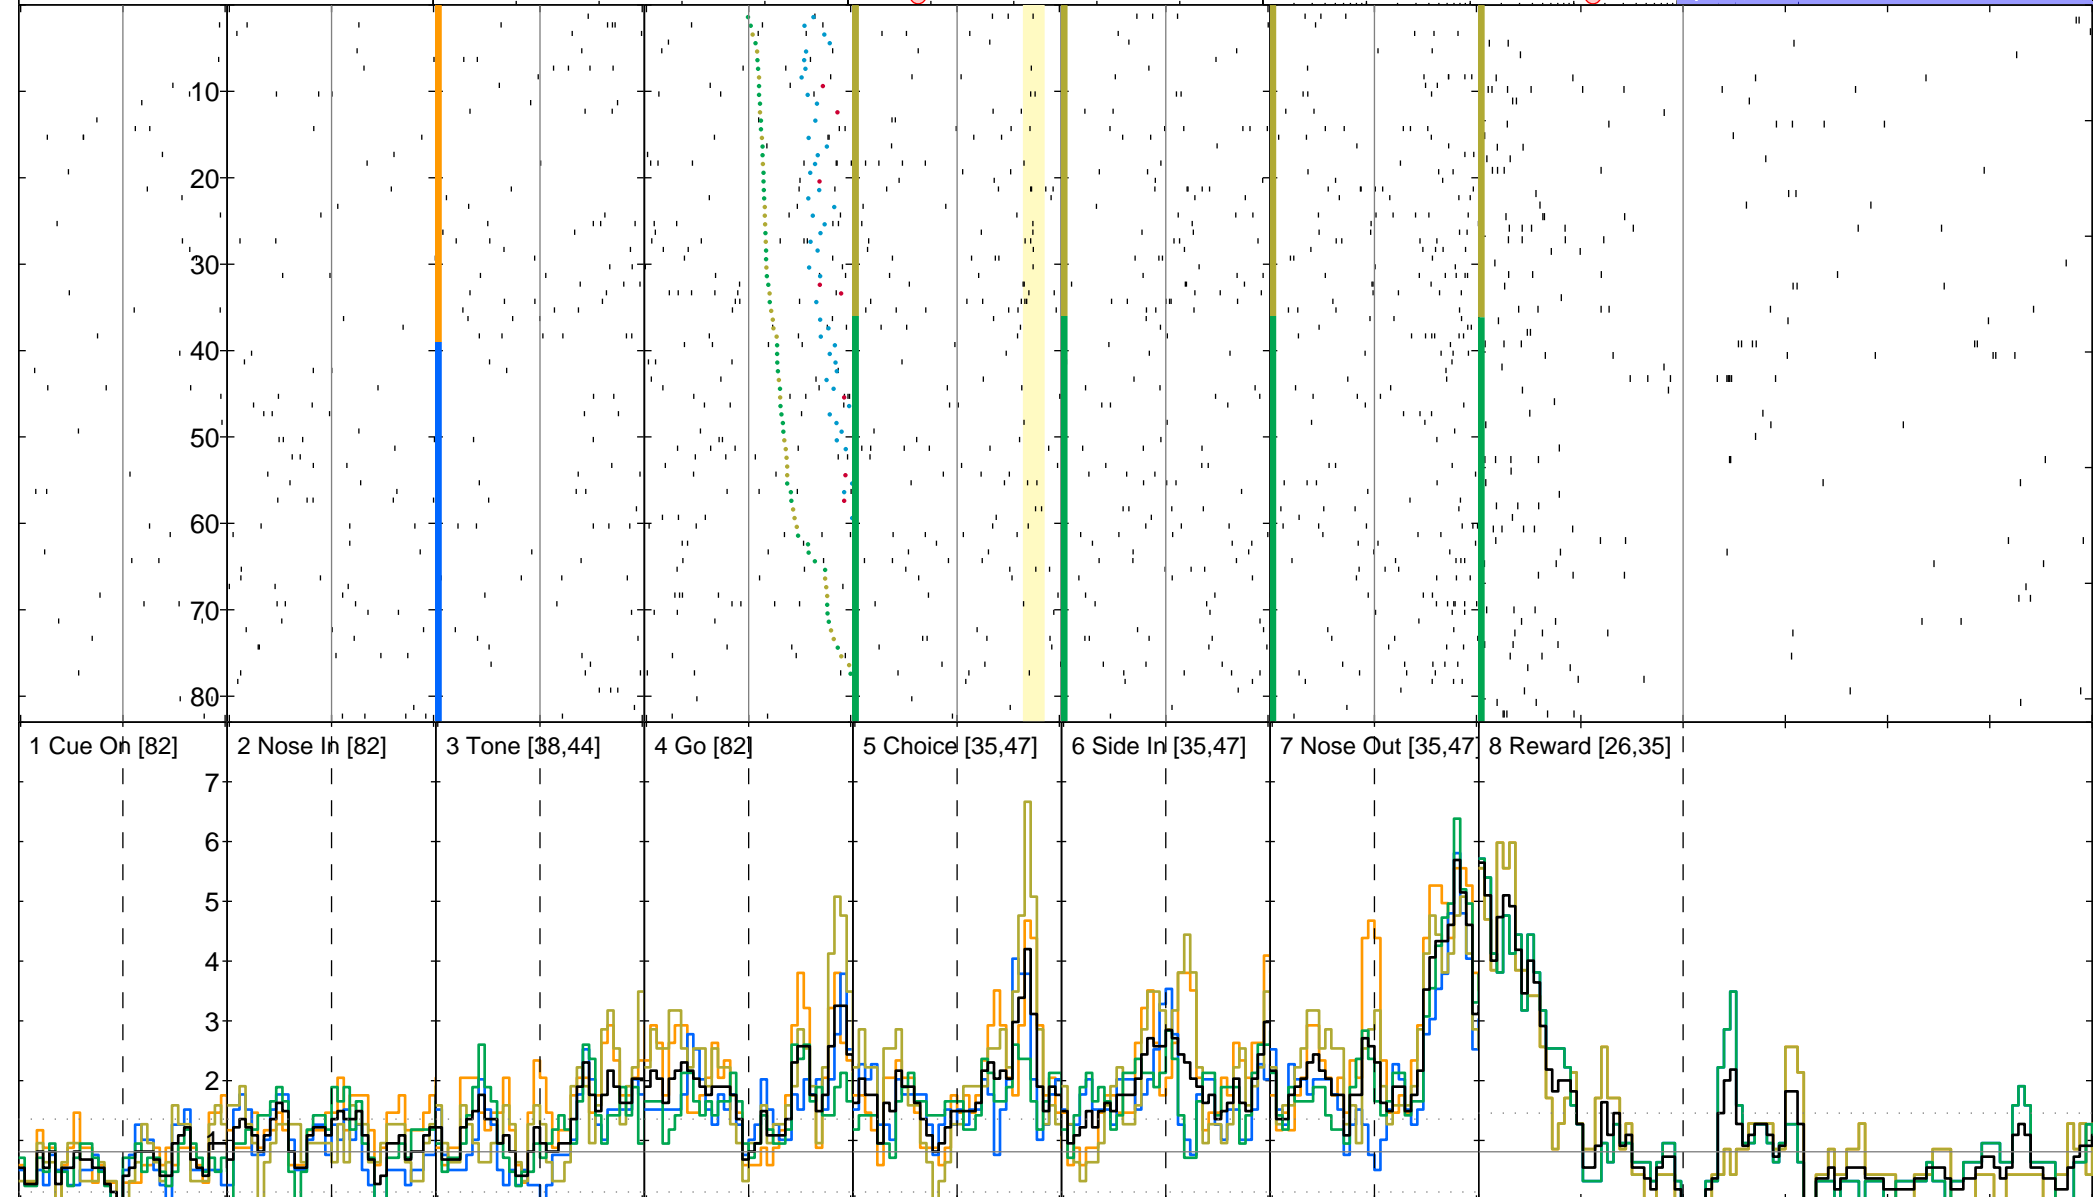

**Cell: C0420070226T04b**

AP: 2.5 ML: 1.8 DV: 5.7  
w: 1 n: 9822  $P_{ISI>2}$ : 0.67  
1/2pw: 322 $\mu$ s p->v: 826 $\mu$ s  
 $\beta_T$ : NaN  $\beta_D$ : NaN  
 $\beta_P$ : NaN SI: NaN  
Session FR: 1.57 Hz  
Pk Ev: 6 - Side In (Tone1)  
Pk FR: 11.1Hz (1.23s) **MSN**

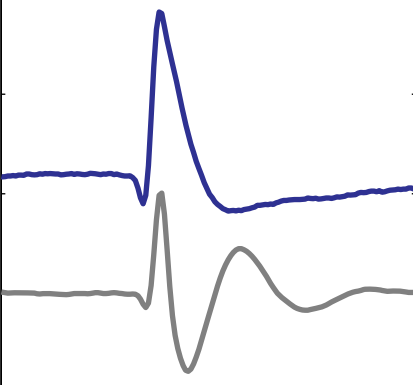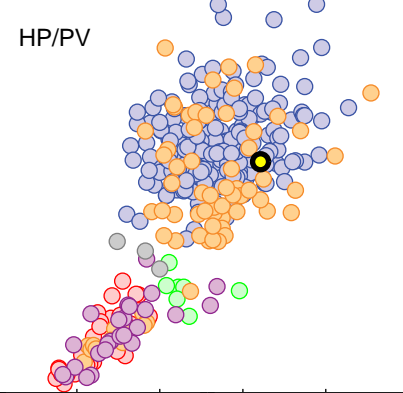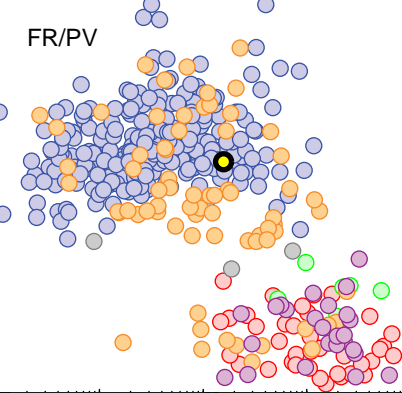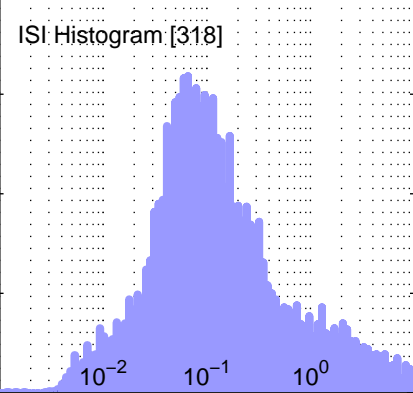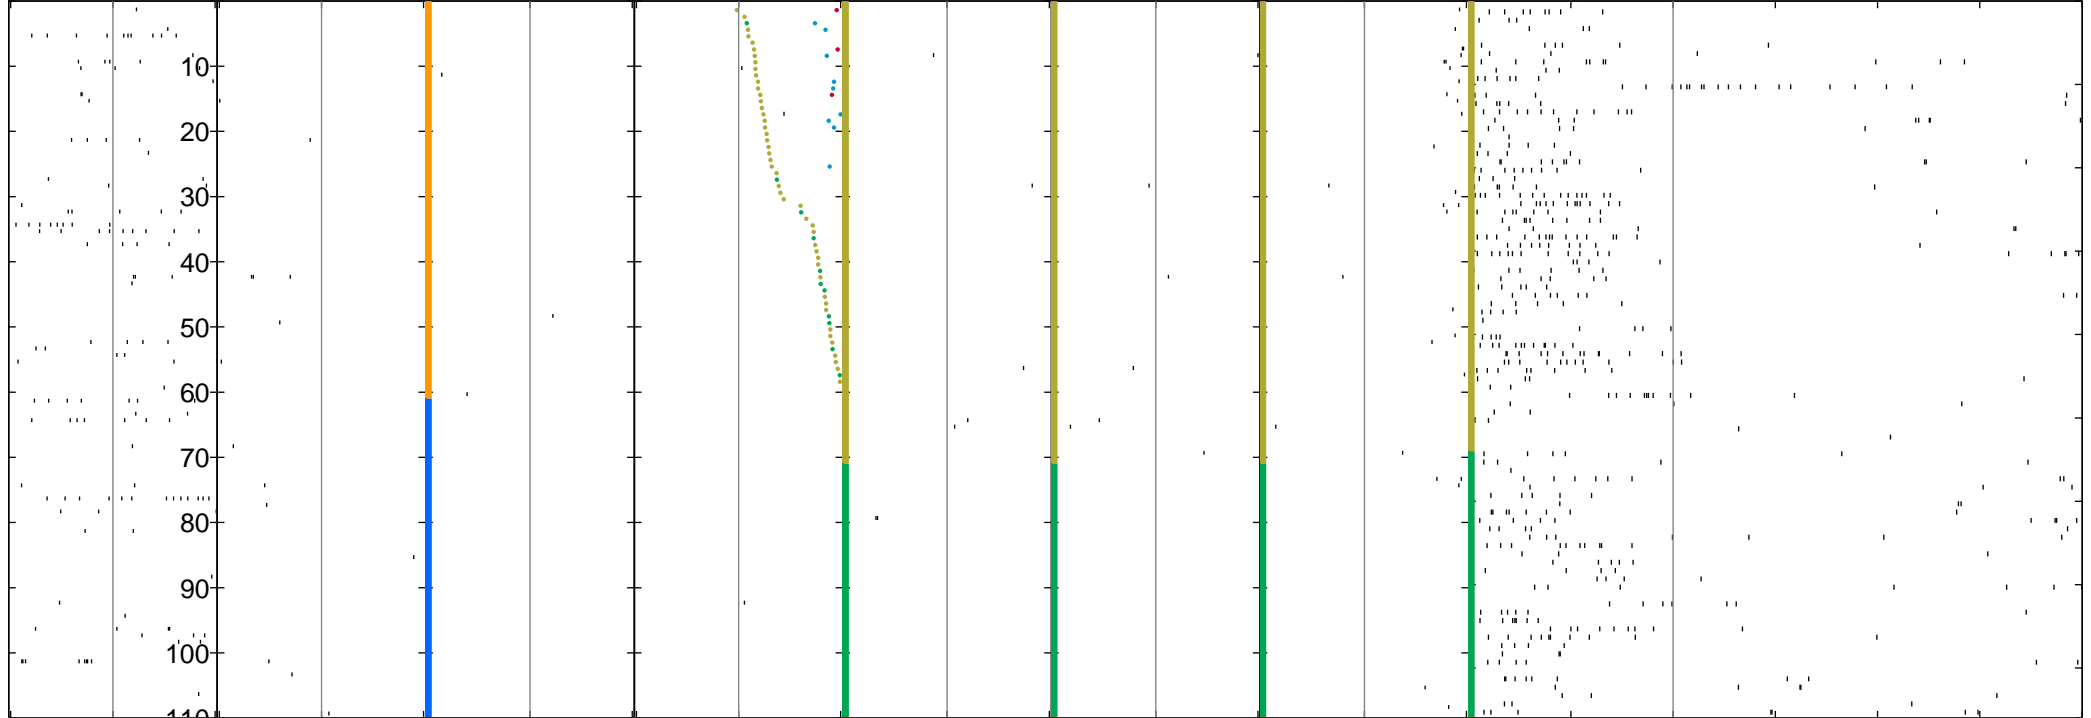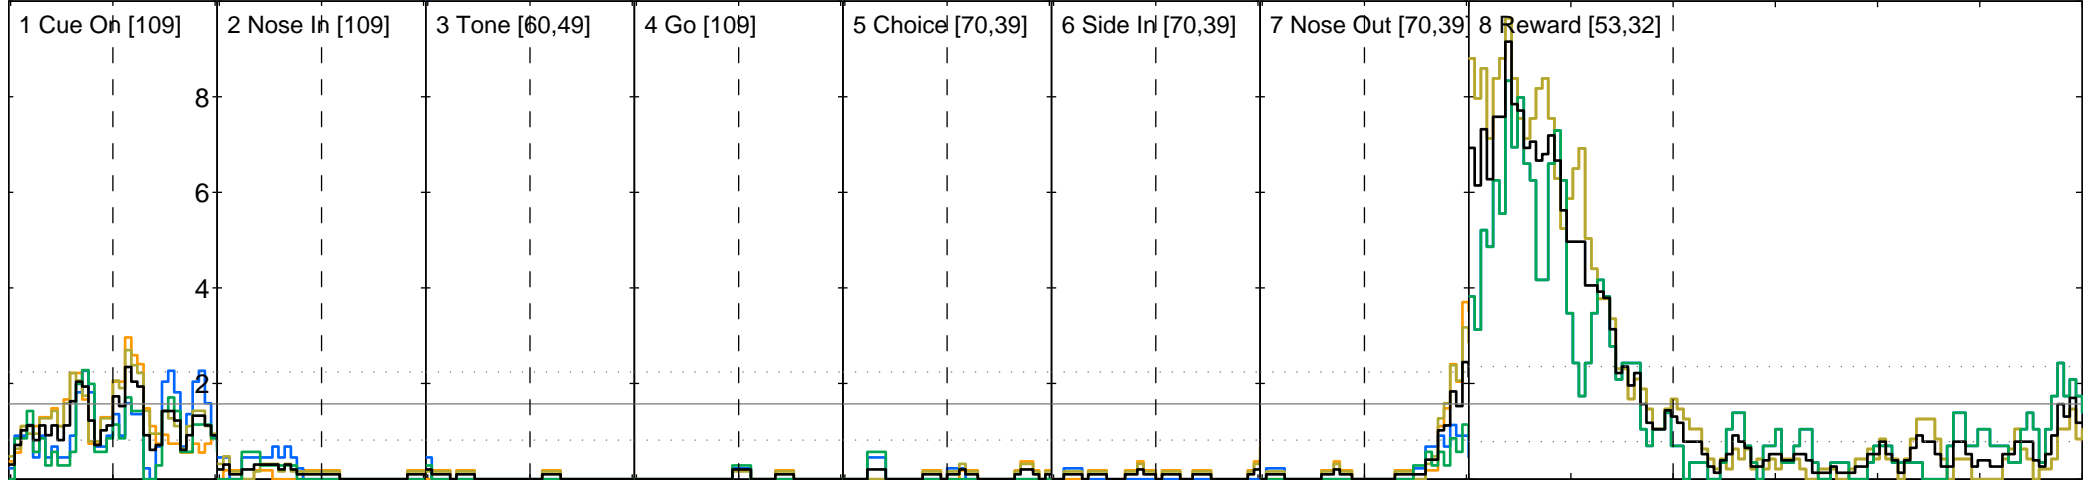

Cell: C0420070301T05b

AP: 2.5 ML: 1.3 DV: 6.3

w: 3 n: 13176  $P_{ISI>2}$ : 0.012

1/2pw: 272 $\mu$ s p $\rightarrow$ v: 1051 $\mu$ s

$\beta_T$ : 3.1  $\beta_D$ : 2.5

$\beta_P$ : -3.5 SI: 0.43

Session FR: 3.61 Hz

Pk Ev: 6 - Side In (Contra)

Pk FR: 9.26Hz (1.32s) **MSN**

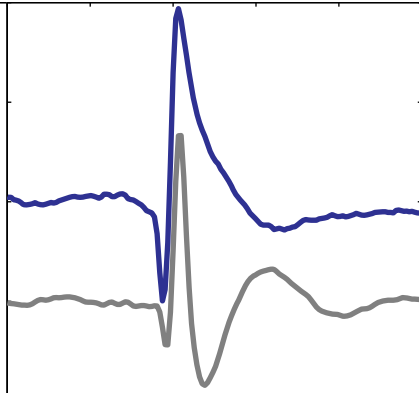

HP/PV

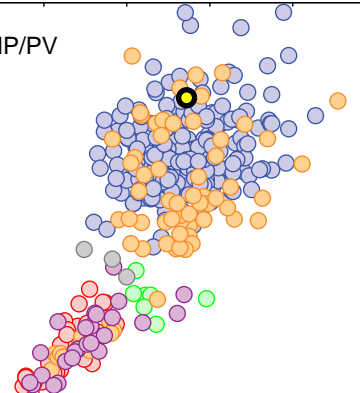

FR/PV

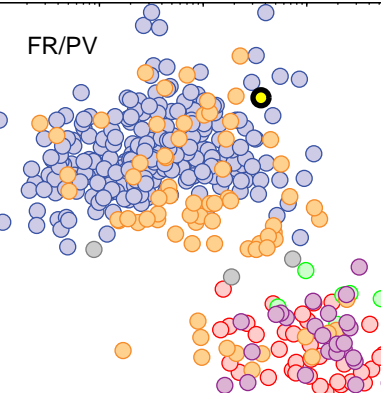

ISI Histogram [443]

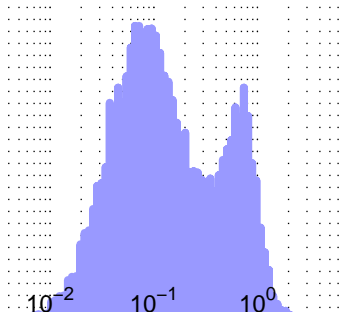

20  
40  
60  
80  
100  
120

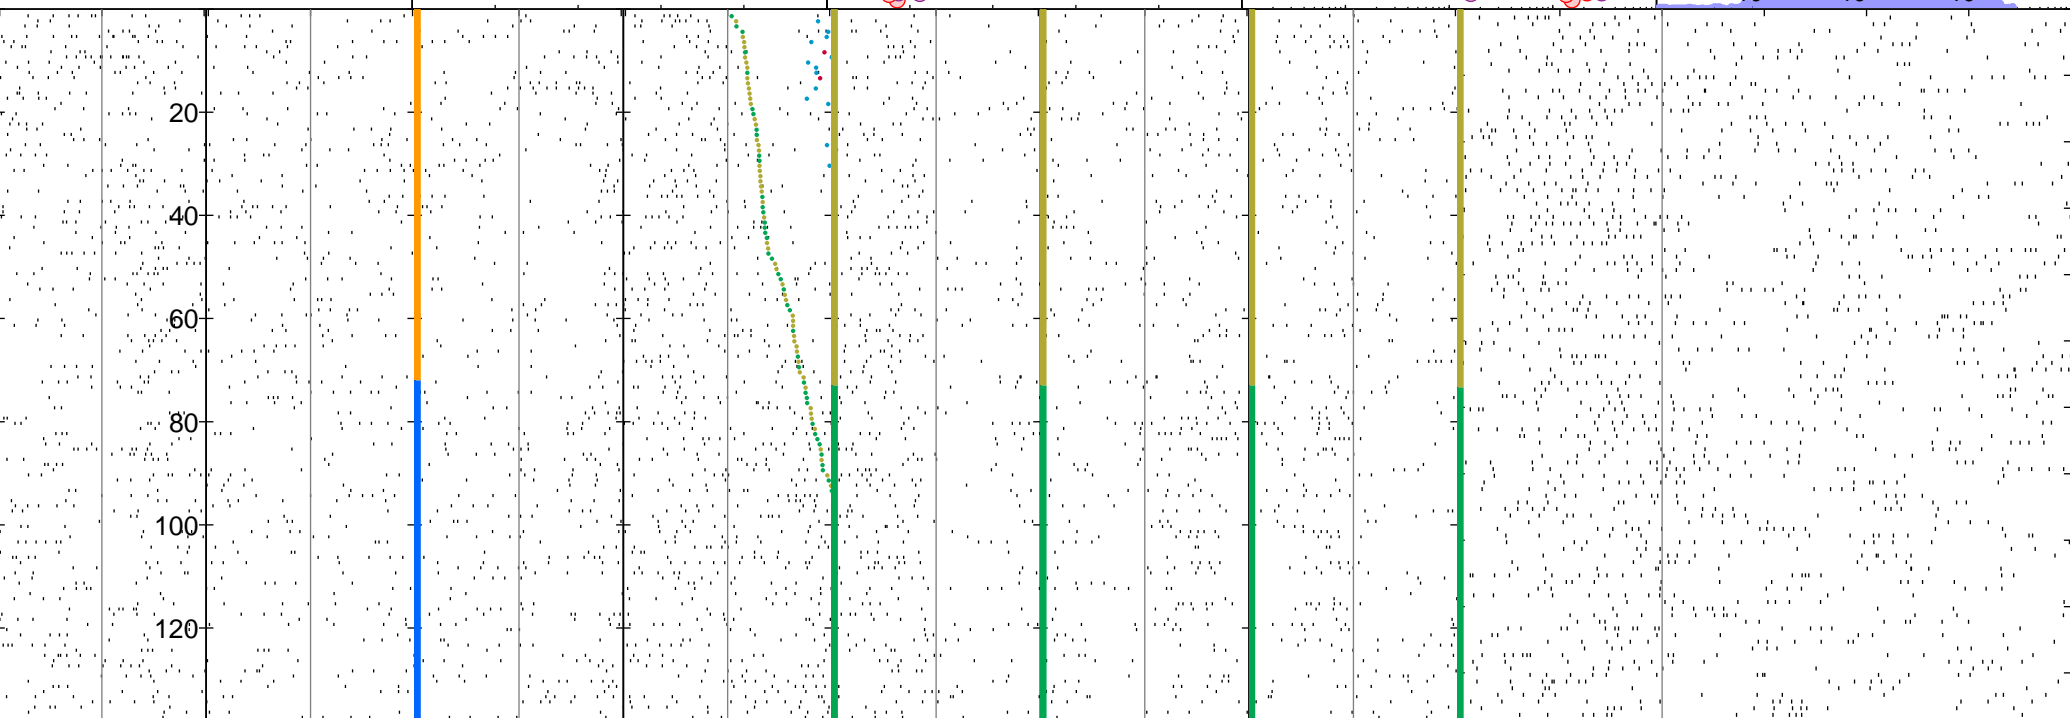

1 Cue On [138] 2 Nose In [138] 3 Tone [71,67] 4 Go [138] 5 Choice [72,66] 6 Side In [72,66] 7 Nose Out [72,66] 8 Reward [56,51]

8  
6  
4  
2

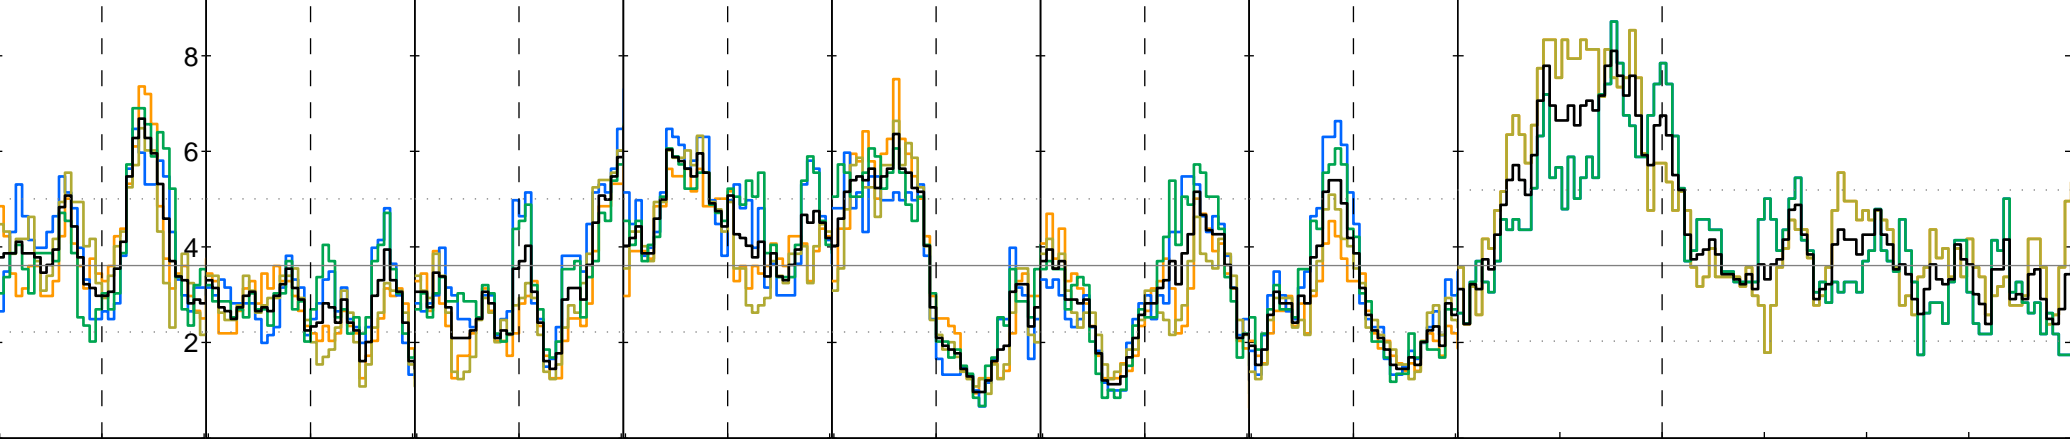

Cell: C0420070310T05a

AP: 2.5 ML: 1.3 DV: 6.4

w: 2 n: 8587  $P_{ISI>2}$ : 0.61

1/2pw: 246 $\mu$ s p->v: 888 $\mu$ s

$\beta_T$ : -0.97  $\beta_D$ : -3.3

$\beta_P$ : 3.1 SI: -1

Session FR: 1.9 Hz

Pk Ev: 7 - Nose out (Contra)

Pk FR: 9.09Hz (-0.36s) **MSN**

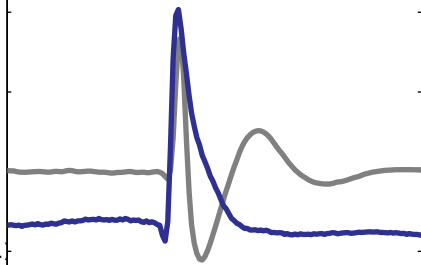

HP/PV

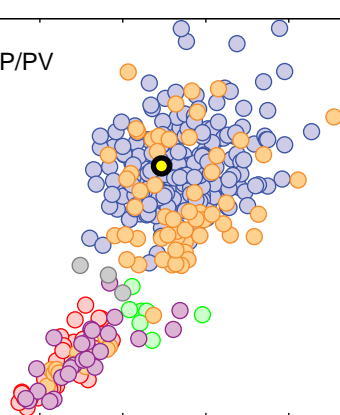

FR/PV

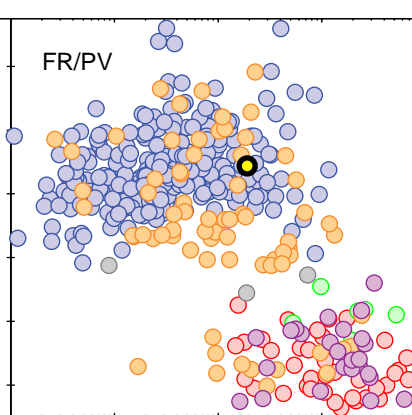

ISI Histogram [229]

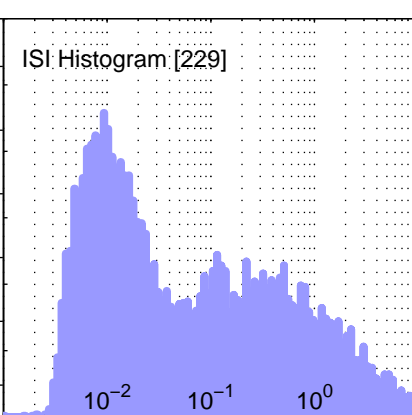

10<sup>-2</sup> 10<sup>-1</sup> 10<sup>0</sup>

10  
20  
30  
40  
50  
60

8  
6  
4  
2

1 Cue On [65]

2 Nose In [65]

3 Tone [34,31]

4 Go [65]

5 Choice [33,32]

6 Side In [33,32]

7 Nose Out [33,32]

8 Reward [22,20]

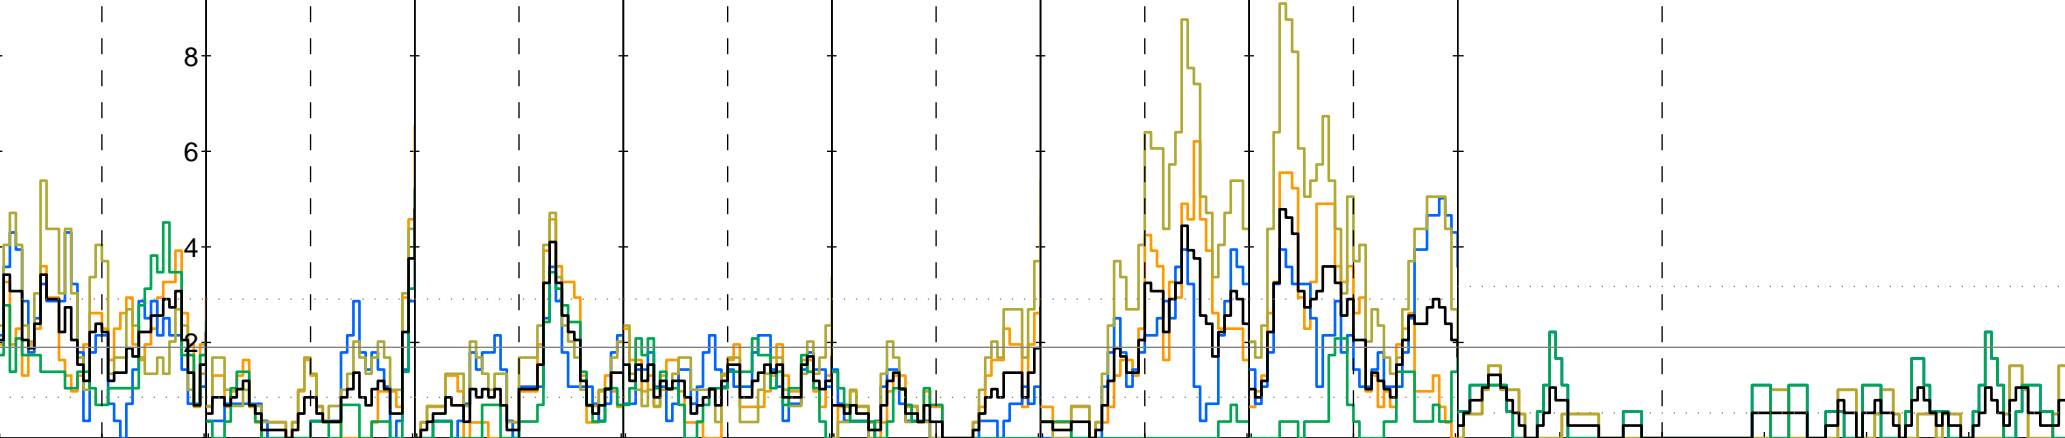



Cell: C0320070618T09c

AP: 1.6 ML: 3.7 DV: 4.9

w: 2 n: 4912  $P_{ISI>2}$ : 0.85

1/2pw: 259 $\mu$ s p->v: 1019 $\mu$ s

$\beta_T$ : 3.5  $\beta_D$ : -4.7

$\beta_P$ : -4.8 SI: -0.77

Session FR: 0.976 Hz

Pk Ev: 7 - Nose out (Contra)

Pk FR: 32.8Hz (0.00s) **MSN**

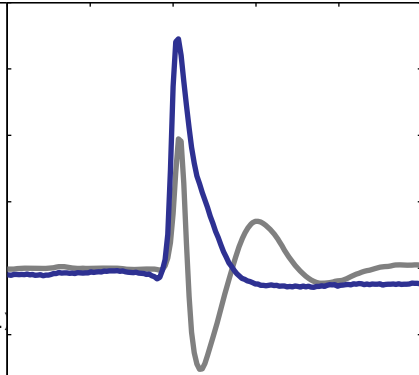

HP/PV

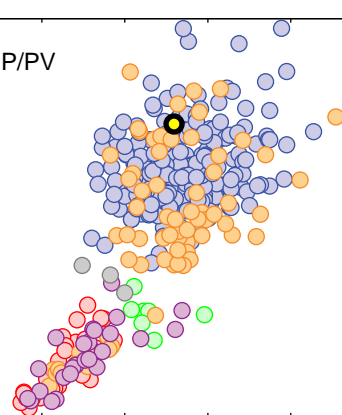

FR/PV

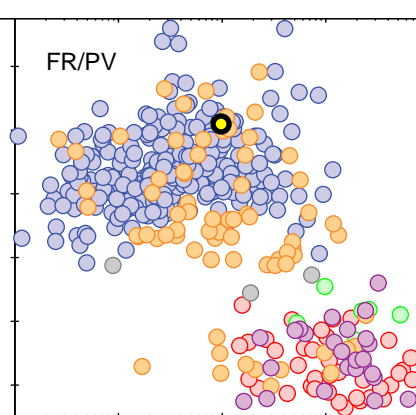

ISI Histogram [121]

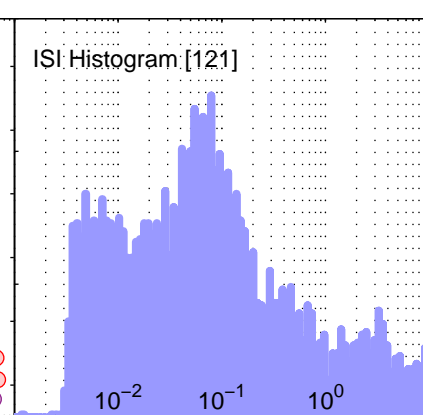

10  
20  
30  
40  
50  
60  
70  
80  
90

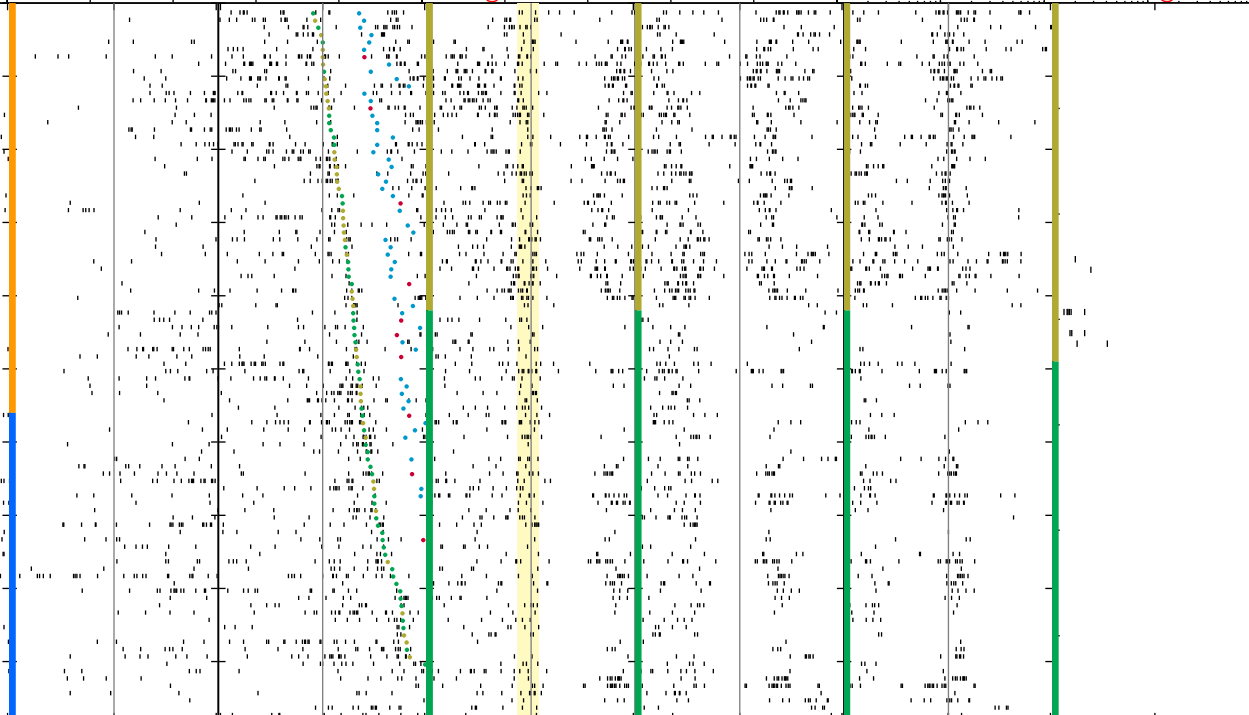

1 Cue On [97]

2 Nose In [97]

3 Tone [55,42]

4 Go [97]

5 Choice [41,56]

6 Side In [41,56]

7 Nose Out [41,56]

8 Reward [33,34]

35  
30  
25  
20  
15  
10  
5

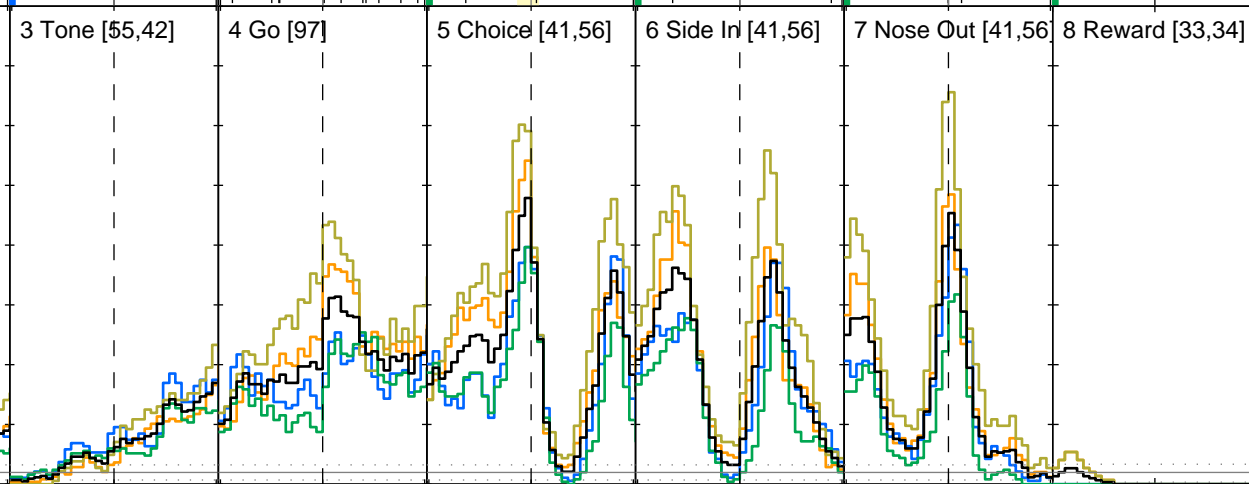

**Cell: C0320070618T09e**

AP: 1.6 ML: 3.7 DV: 4.9

w: 2 n: 1340  $P_{ISI>2}$ : 0.94

1/2pw: 267 $\mu$ s p $\rightarrow$ v: 781 $\mu$ s

$\beta_T$ : 2.4  $\beta_D$ : -4.8

$\beta_P$ : -1.7 SI: -0.83

Session FR: 0.269 Hz

Pk Ev: 7 - Nose out (Contra)

Pk FR: 8.94Hz (0.06s) **MSN**

Waveform

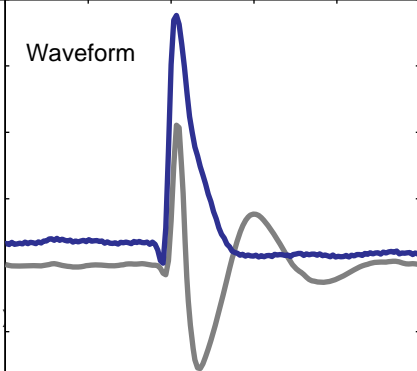

HP/PV

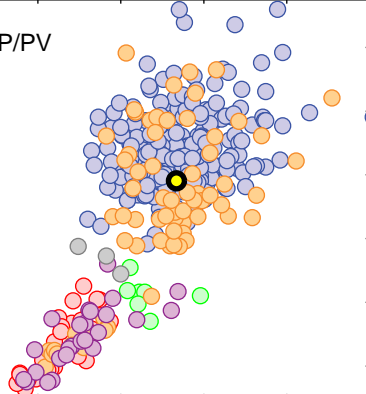

FR/PV

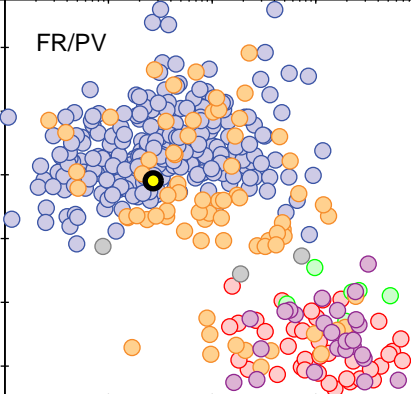

ISI Histogram [31]

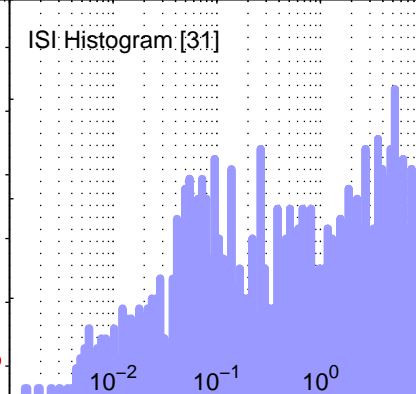

10  
20  
30  
40  
50  
60  
70  
80  
90

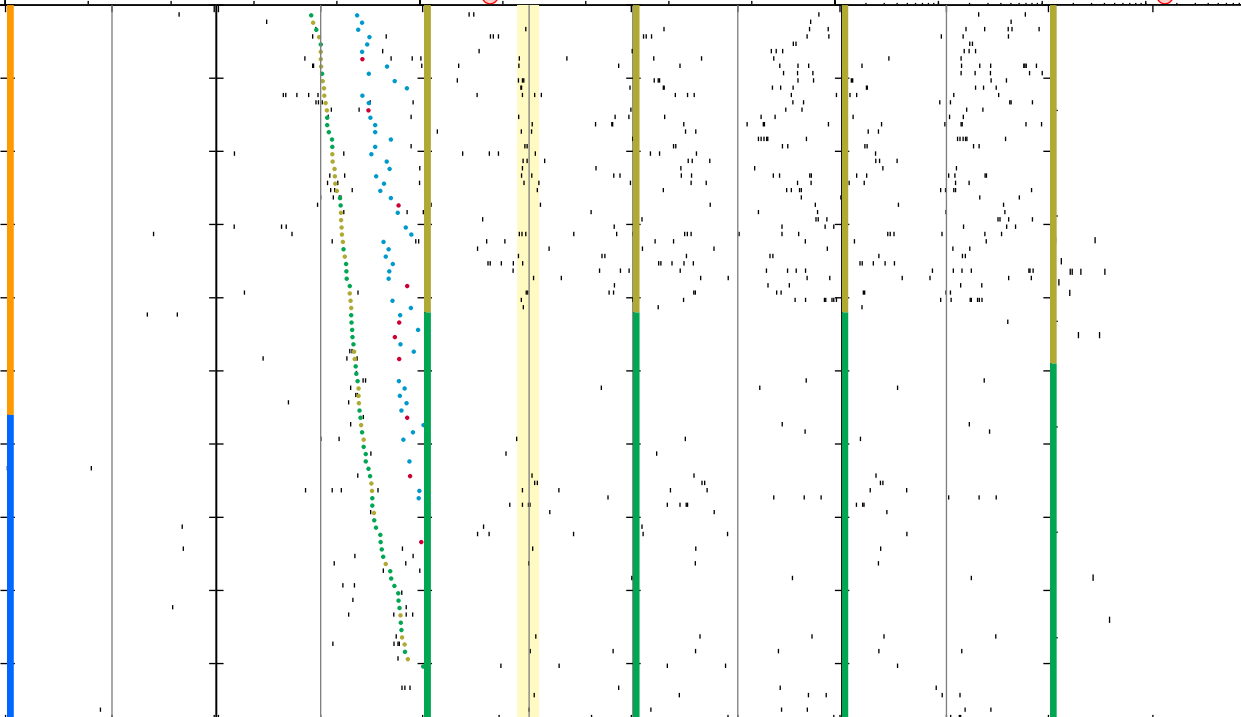

1 Cue On [97]

2 Nose In [97]

3 Tone [55,42]

4 Go [97]

5 Choice [41,56]

6 Side In [41,56]

7 Nose Out [41,56]

8 Reward [33,34]

8  
6  
4  
2

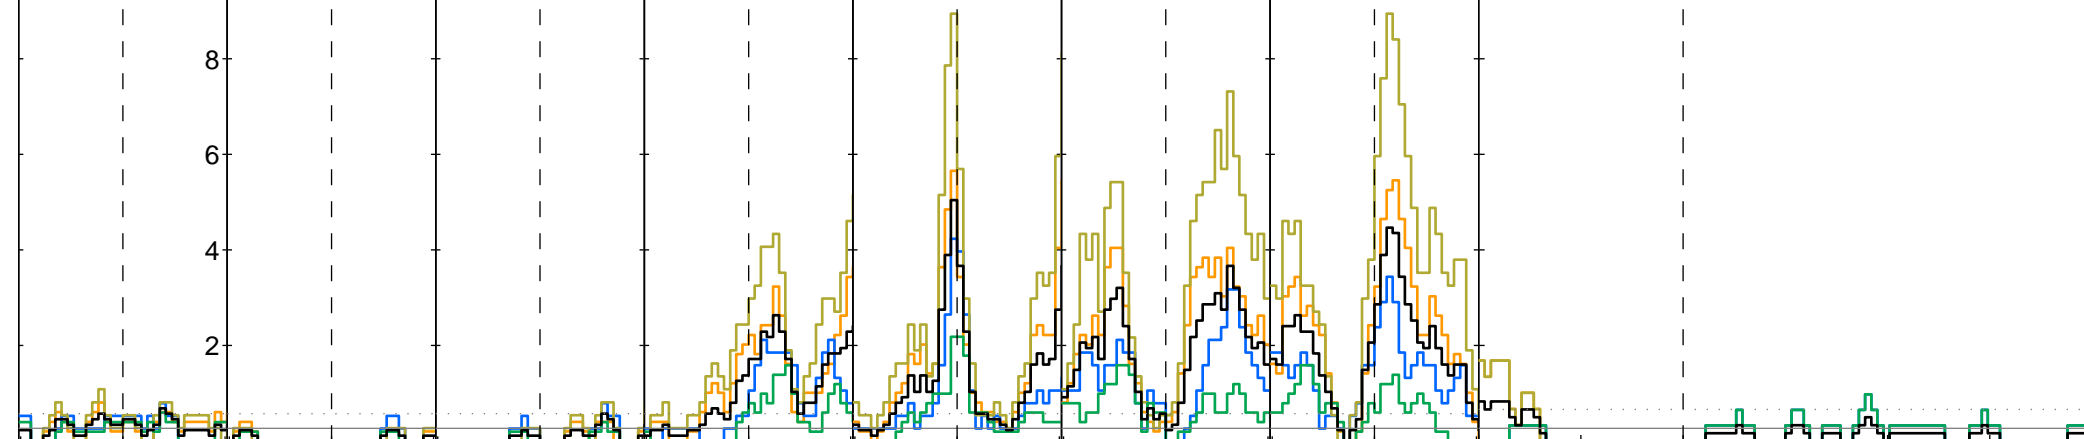

Cell: C0520070405T11d

AP: -0.48 ML: 4.6 DV: 4.4

w: 1 n: 1576  $P_{ISI>2}$ : 0.9

1/2pw: 285 $\mu$ s p $\rightarrow$ v: 1042 $\mu$ s

$\beta_T$ : 1.7  $\beta_D$ : 3.1

$\beta_P$ : -3.4 SI: 1

Session FR: 1.03 Hz

Pk Ev: 7 - Nose out (Ipsi)

Pk FR: 26.3Hz (0.06s) MSN

Waveform

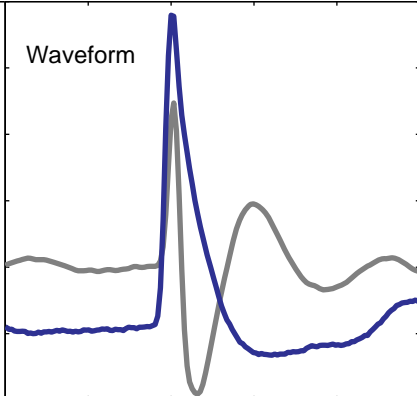

HP/PV

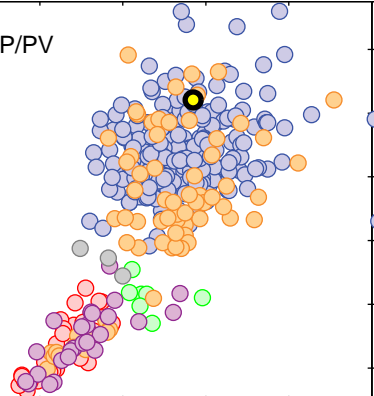

FR/PV

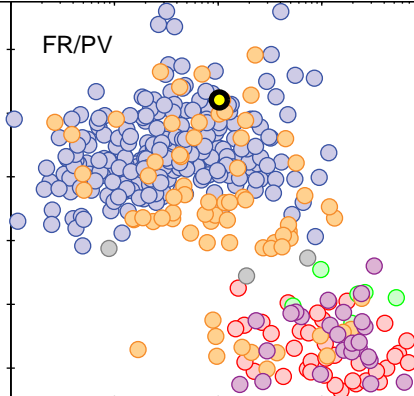

ISI Histogram [96]

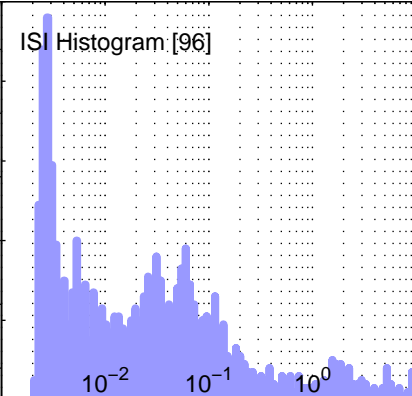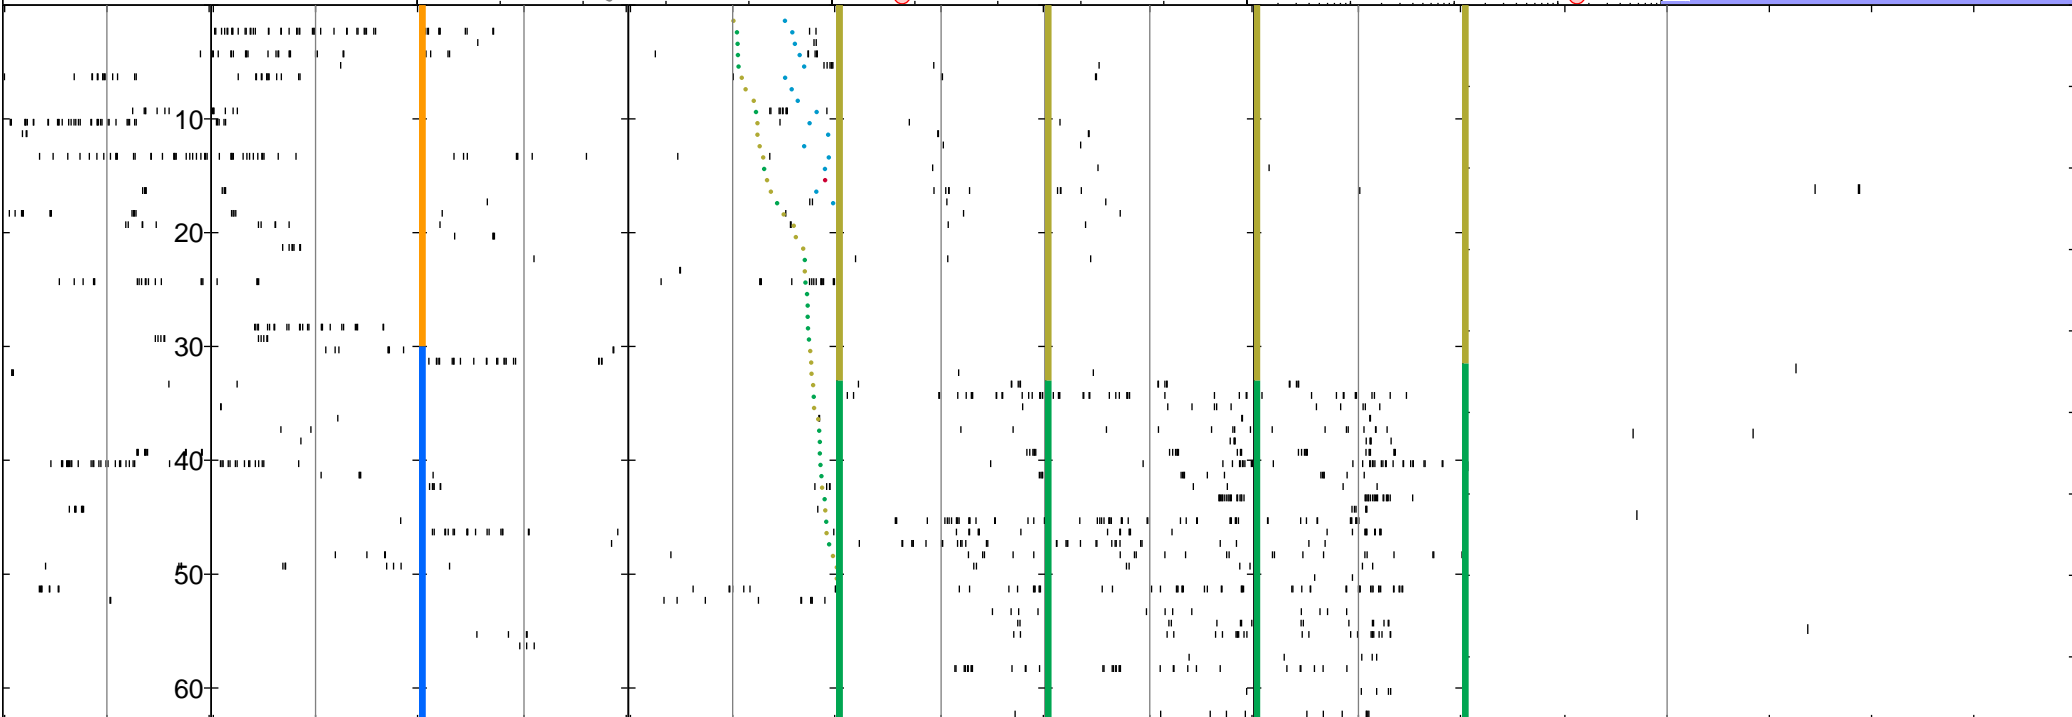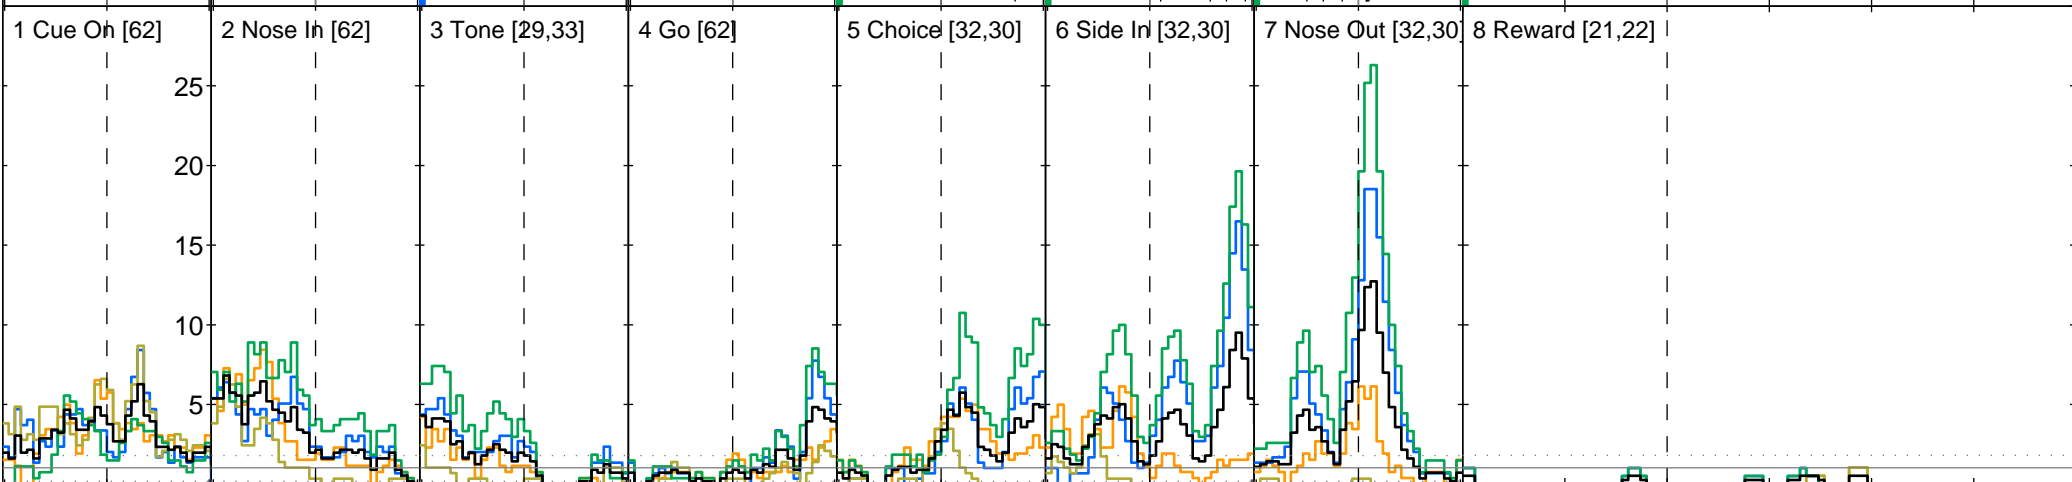

Cell: C0320070622T11b

AP: -0.96 ML: 3.7 DV: 5.8

w: 3 n: 3777  $P_{ISI>2}$ : 0.81

1/2pw: 189 $\mu$ s p->v: 947 $\mu$ s

$\beta_T$ : -2.5  $\beta_D$ : 7.2

$\beta_P$ : 2.5 SI: 0.81

Session FR: 0.955 Hz

Pk Ev: 7 - Nose out (Ipsi)

Pk FR: 31.7Hz (0.09s) MSN

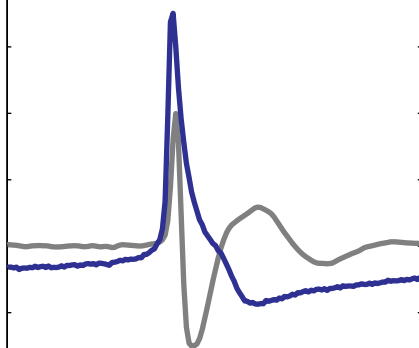

HP/PV

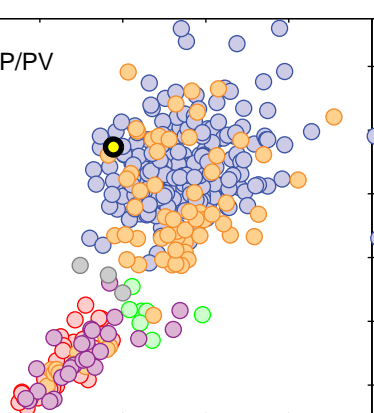

FR/PV

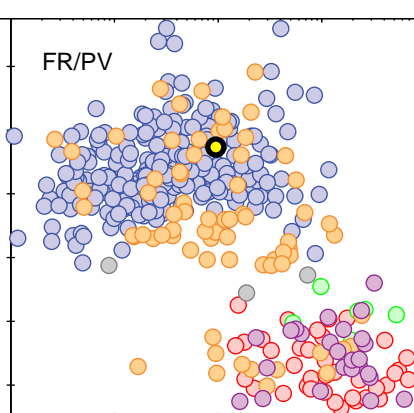

ISI Histogram [131]

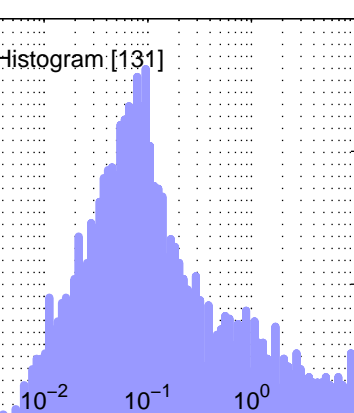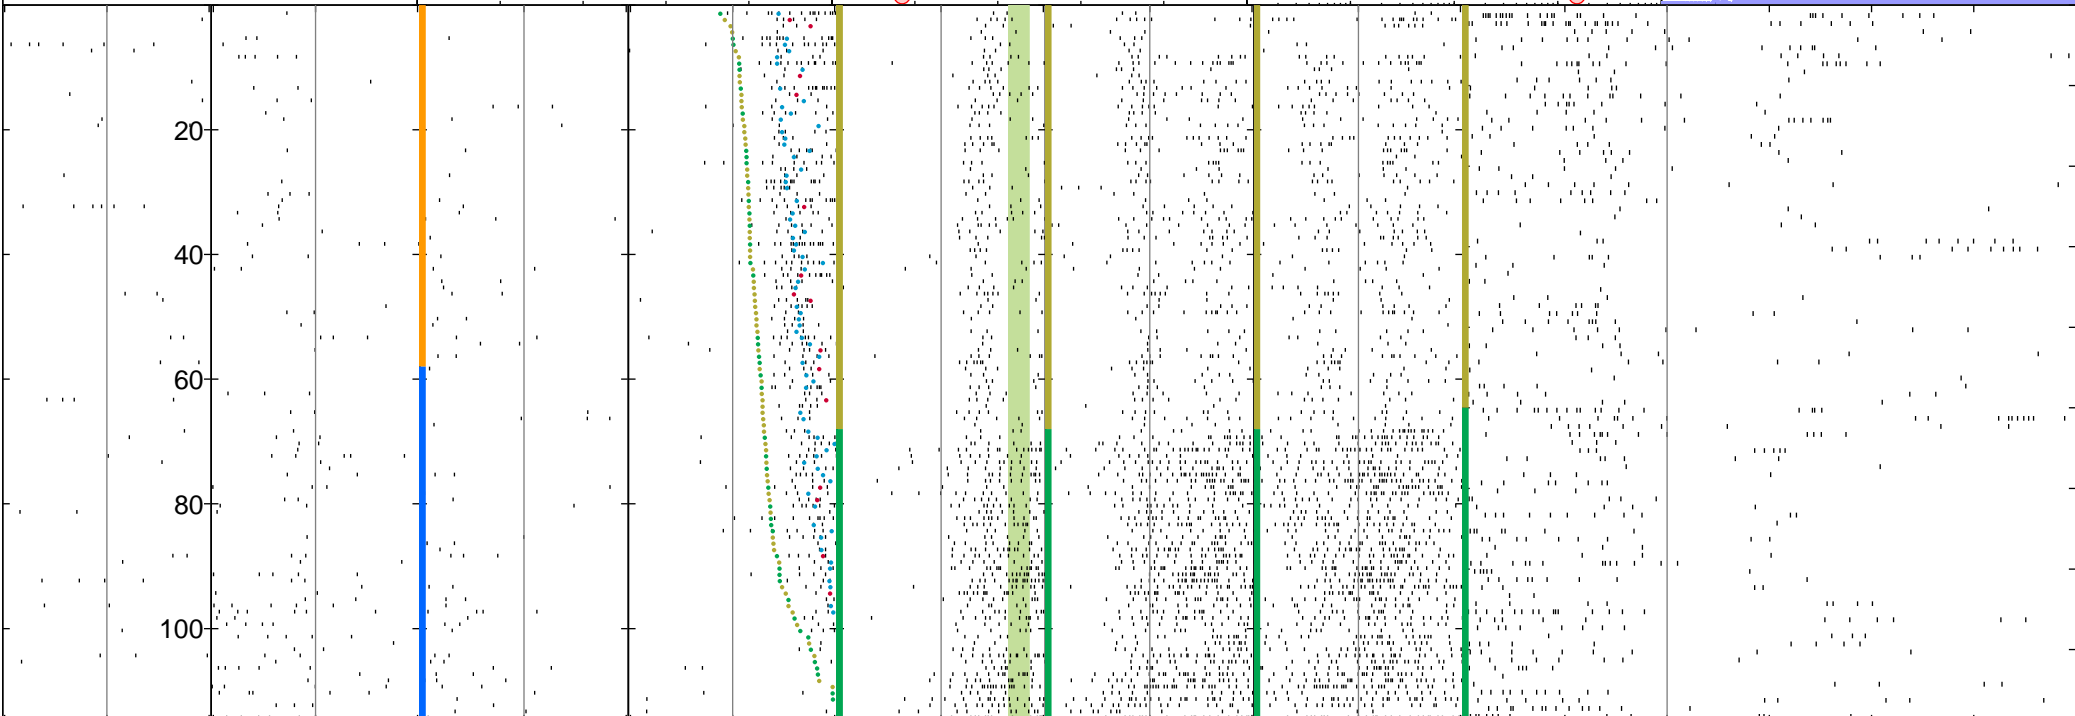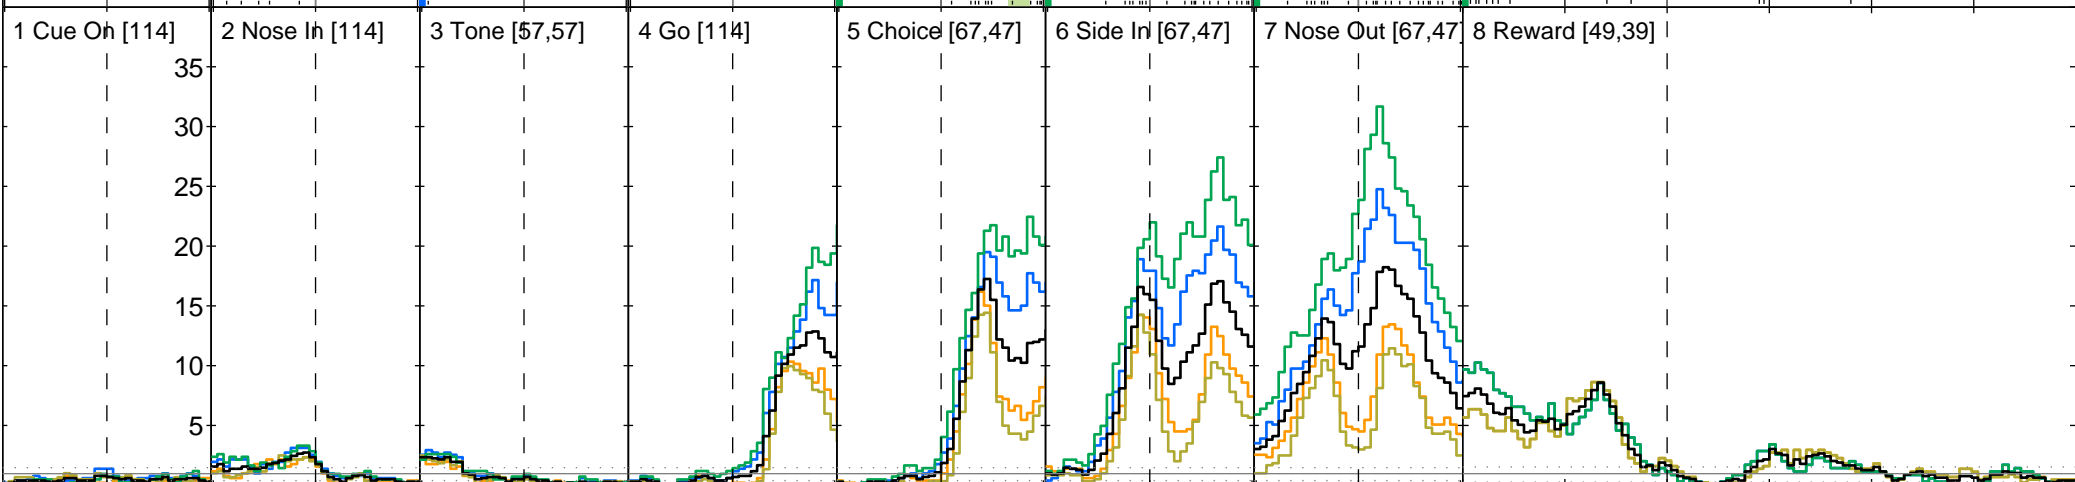

**Cell: C0520070406T05c**

AP: 2.2 ML: 1.2 DV: 7.6  
w: 2 n: 6430  $P_{ISI>2}$ : 0.49  
1/2pw: 304 $\mu$ s p->v: 773 $\mu$ s  
 $\beta_T$ : -2.3  $\beta_D$ : -2.6  
 $\beta_P$ : 4.5 SI: -0.58  
Session FR: 1.47 Hz  
Pk Ev: 7 - Nose out (Tone1)  
Pk FR: 10.3Hz (0.12s) **MSN**

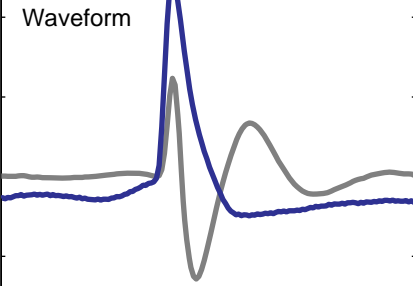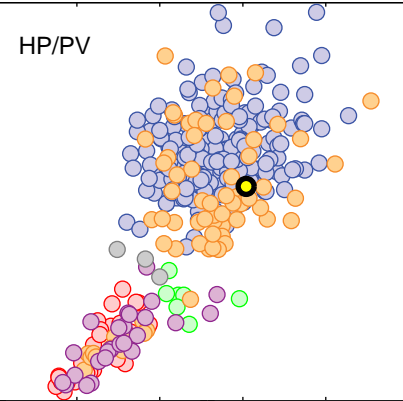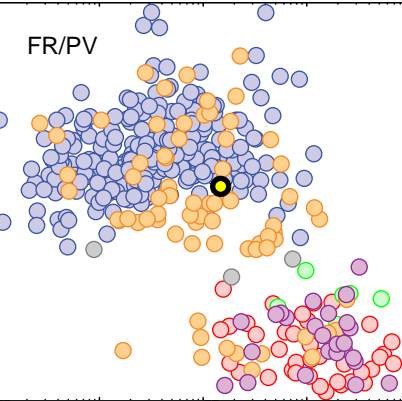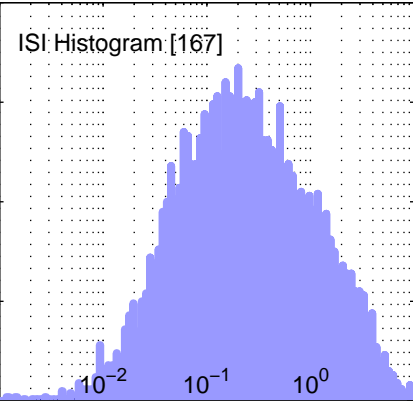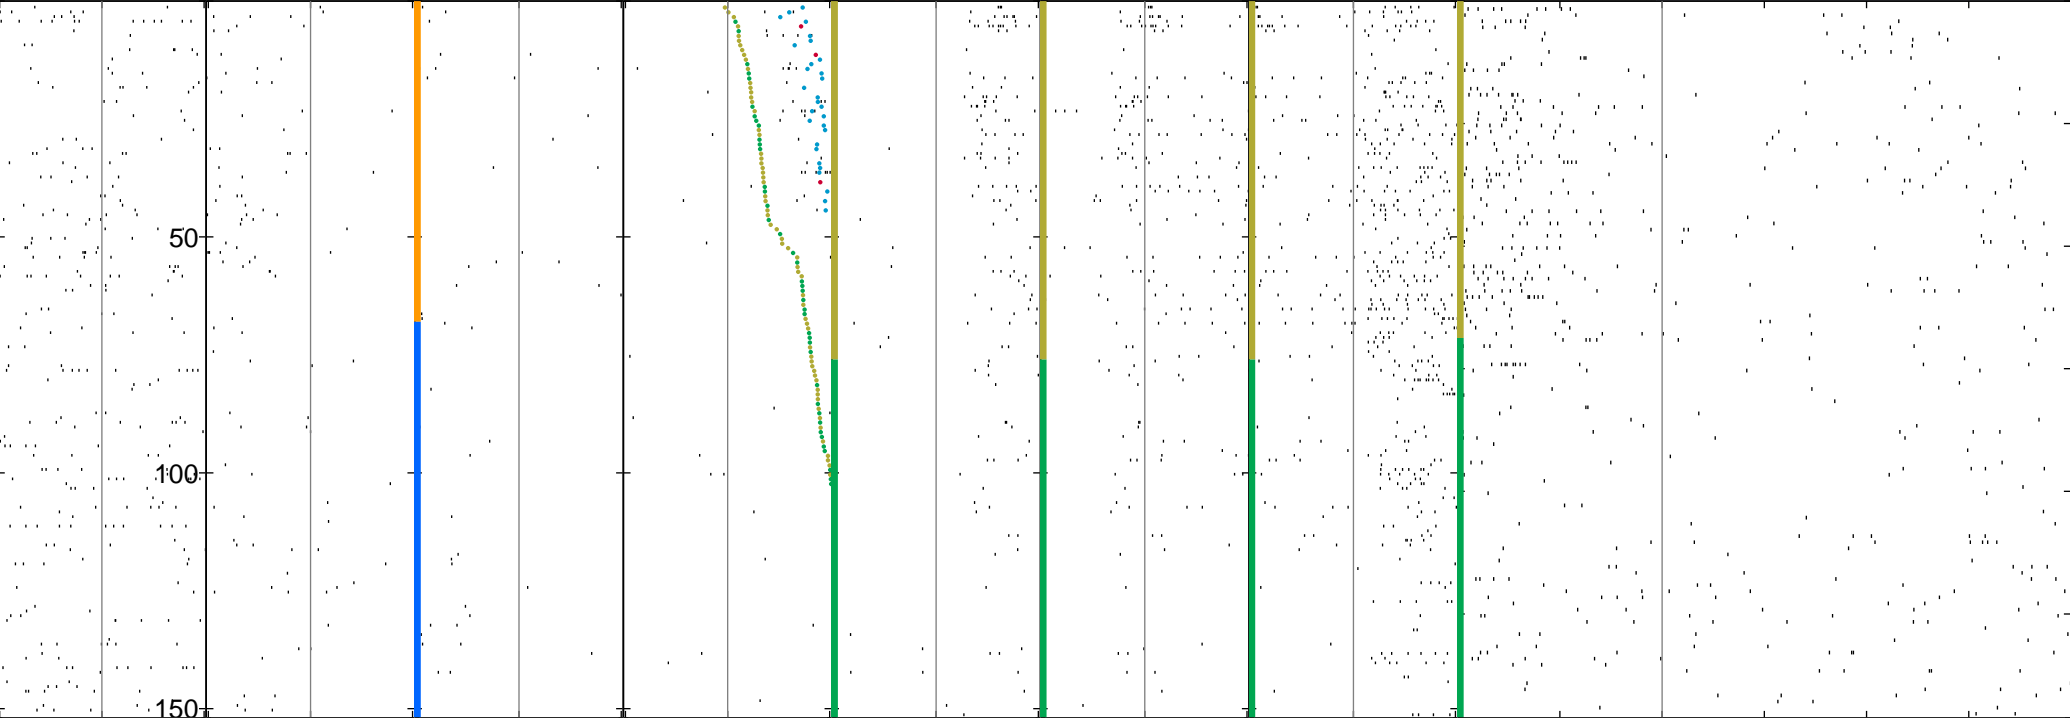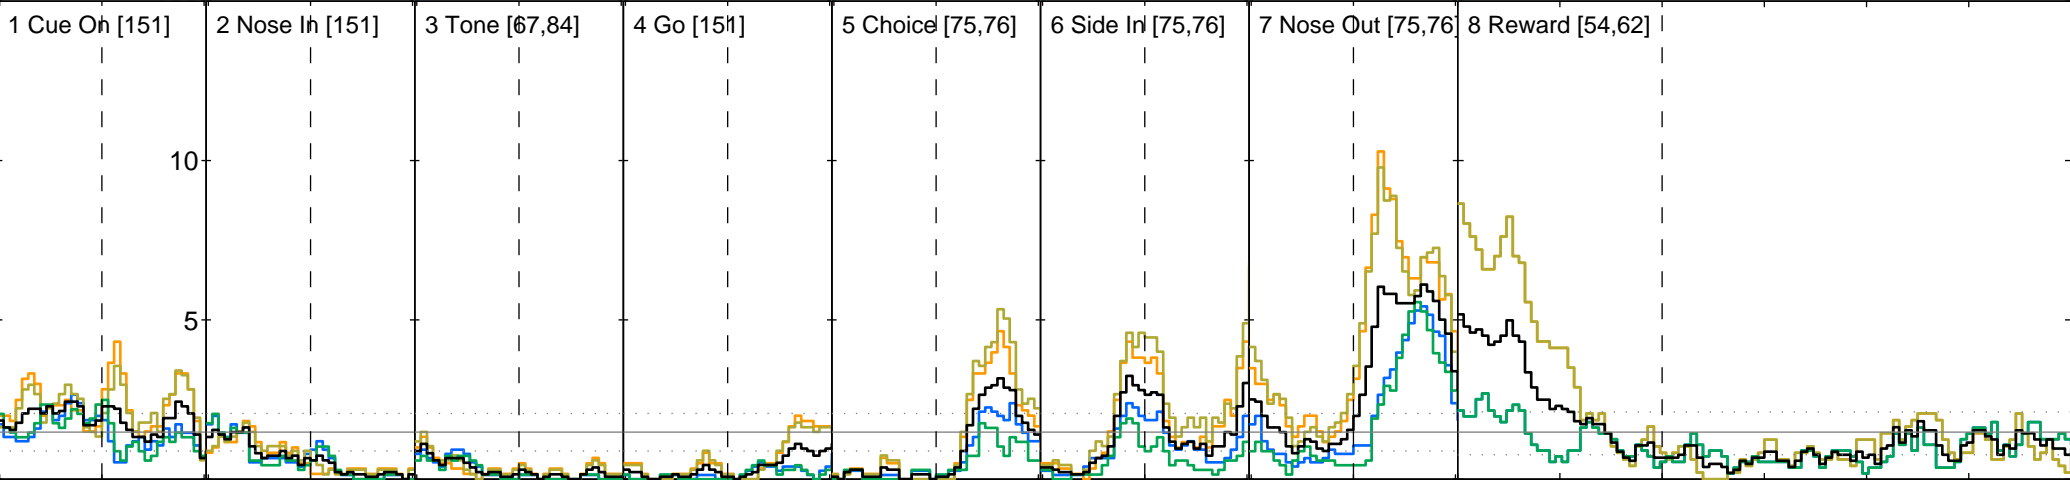



**Cell: C0320070622T07a**

AP: 0.96 ML: 3.6 DV: 6.1

w: 2 n: 5674  $P_{ISI>2}$ : 0.5

1/2pw: 312 $\mu$ s p $\rightarrow$ v: 968 $\mu$ s

$\beta_T$ : -3.1  $\beta_D$ : 7.1

$\beta_P$ : -3 SI: 0.9

Session FR: 1.43 Hz

Pk Ev: 7 - Nose out (Ipsi)

Pk FR: 13.2Hz (0.18s) **MSN**

Waveform

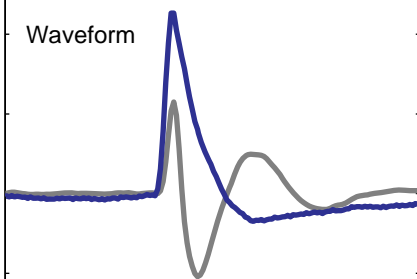

HP/PV

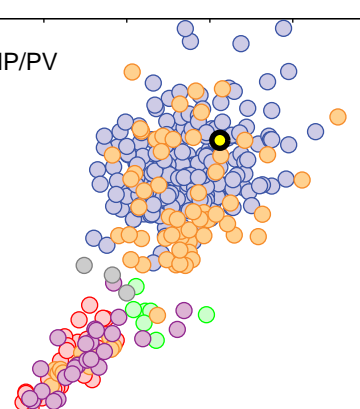

FR/PV

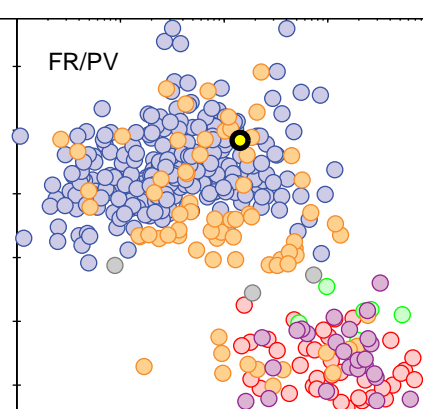

ISI Histogram [149]

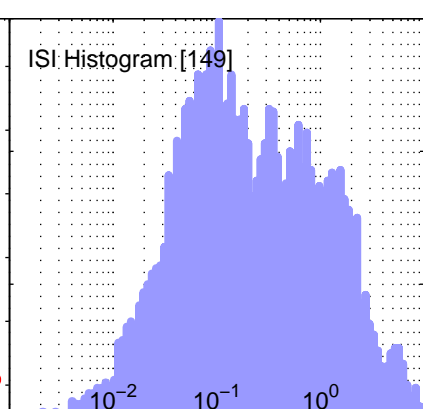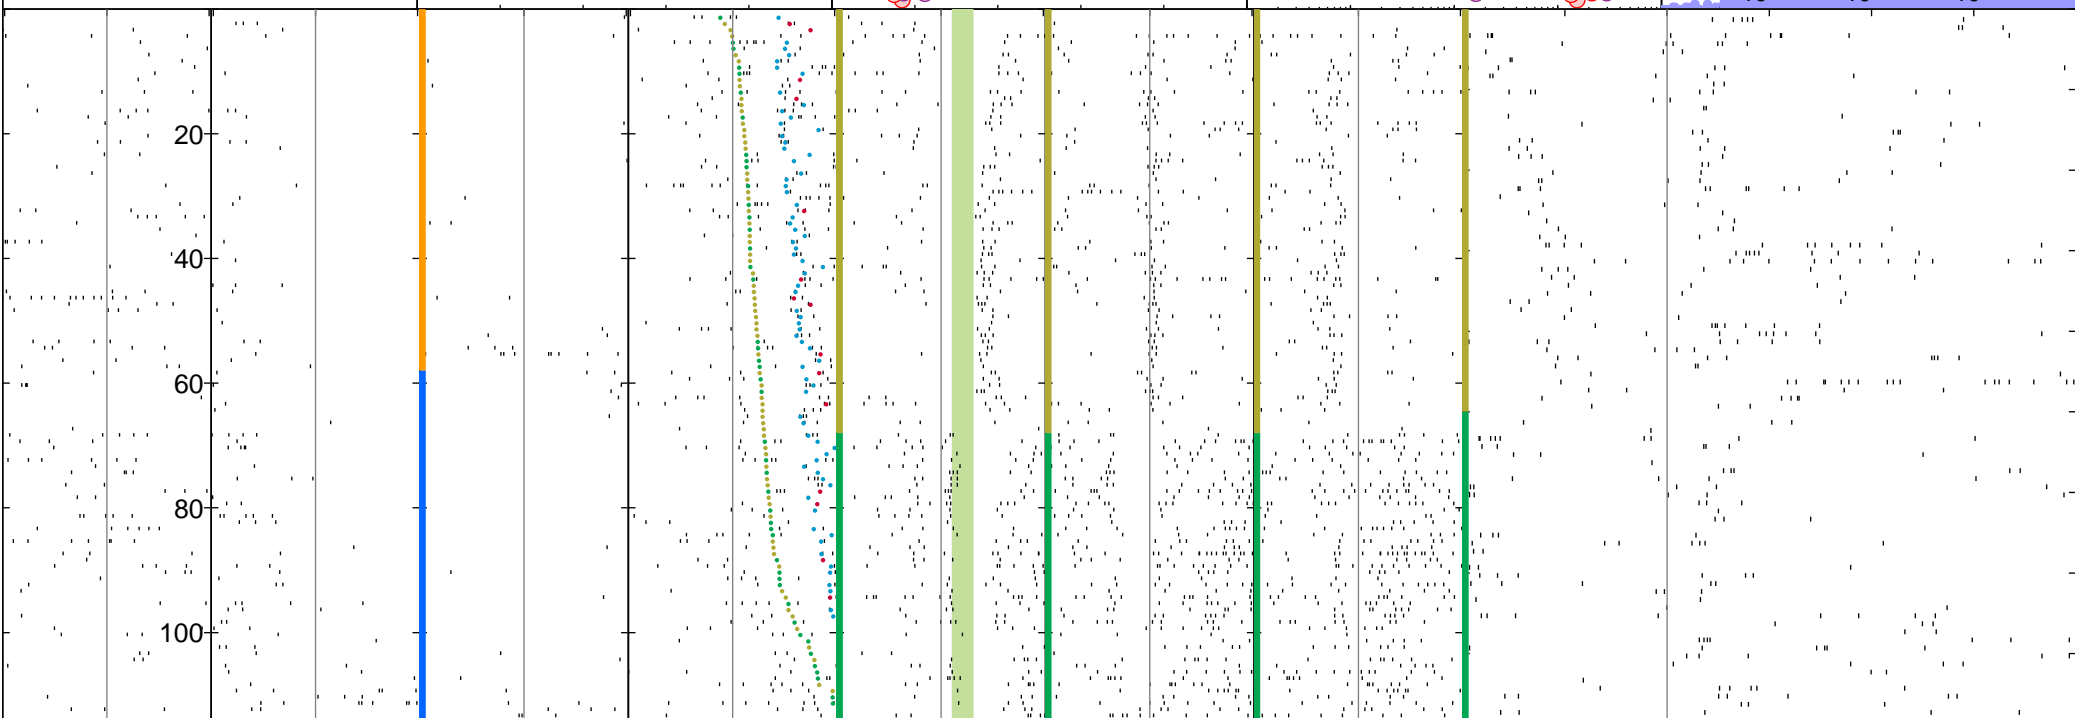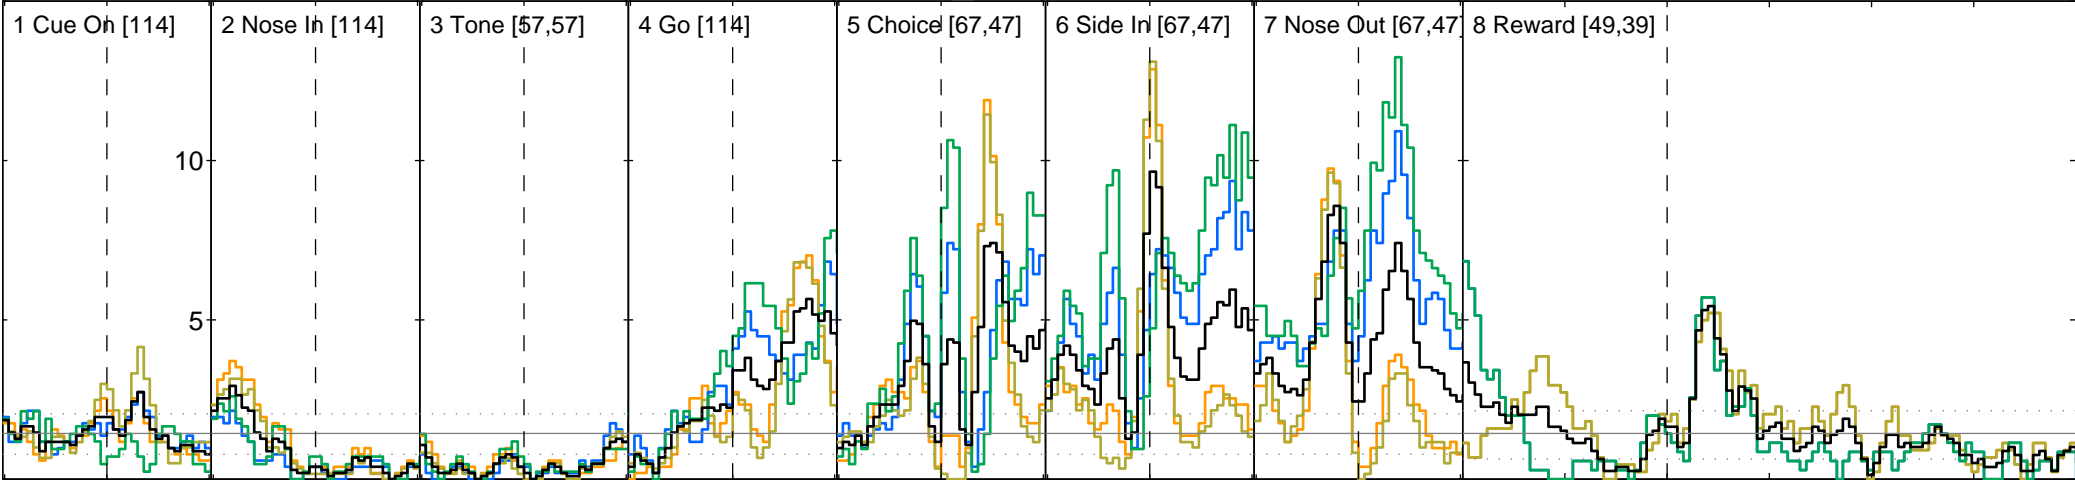

Cell: C0320070618T09d

AP: 1.6 ML: 3.7 DV: 4.9

w: 2 n: 7206  $P_{ISI>2}$ : 0.81

1/2pw: 302 $\mu$ s p->v: 920 $\mu$ s

$\beta_T$ : -2.1  $\beta_D$ : -7.9

$\beta_P$ : -1.2 SI: -1

Session FR: 1.44 Hz

Pk Ev: 7 - Nose out (Contra)

Pk FR: 36Hz (0.27s) MSN

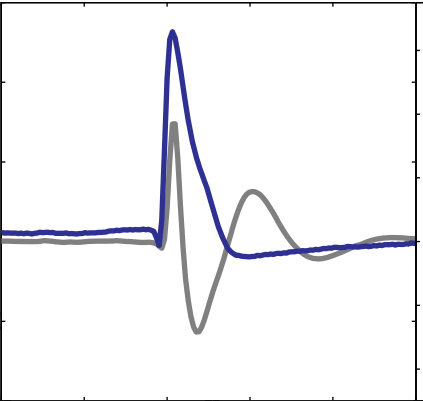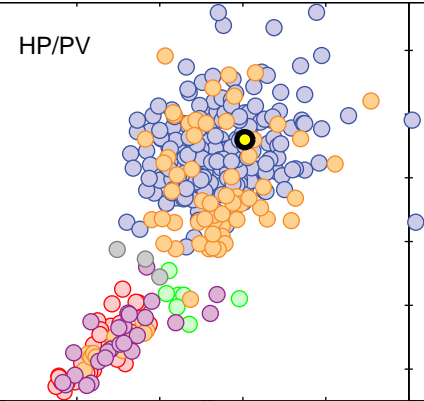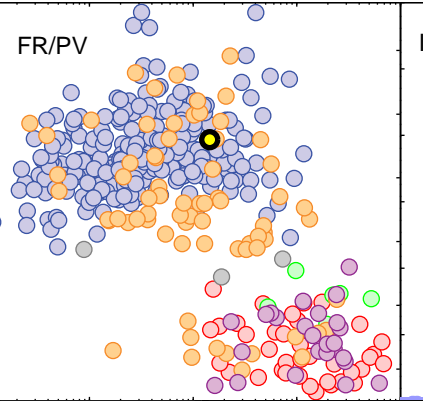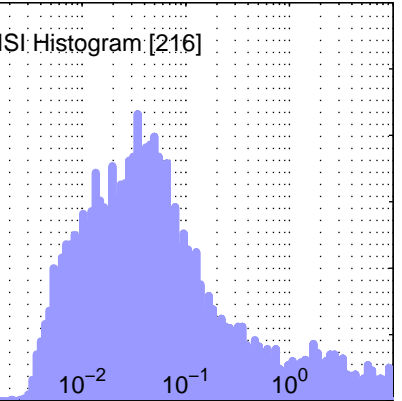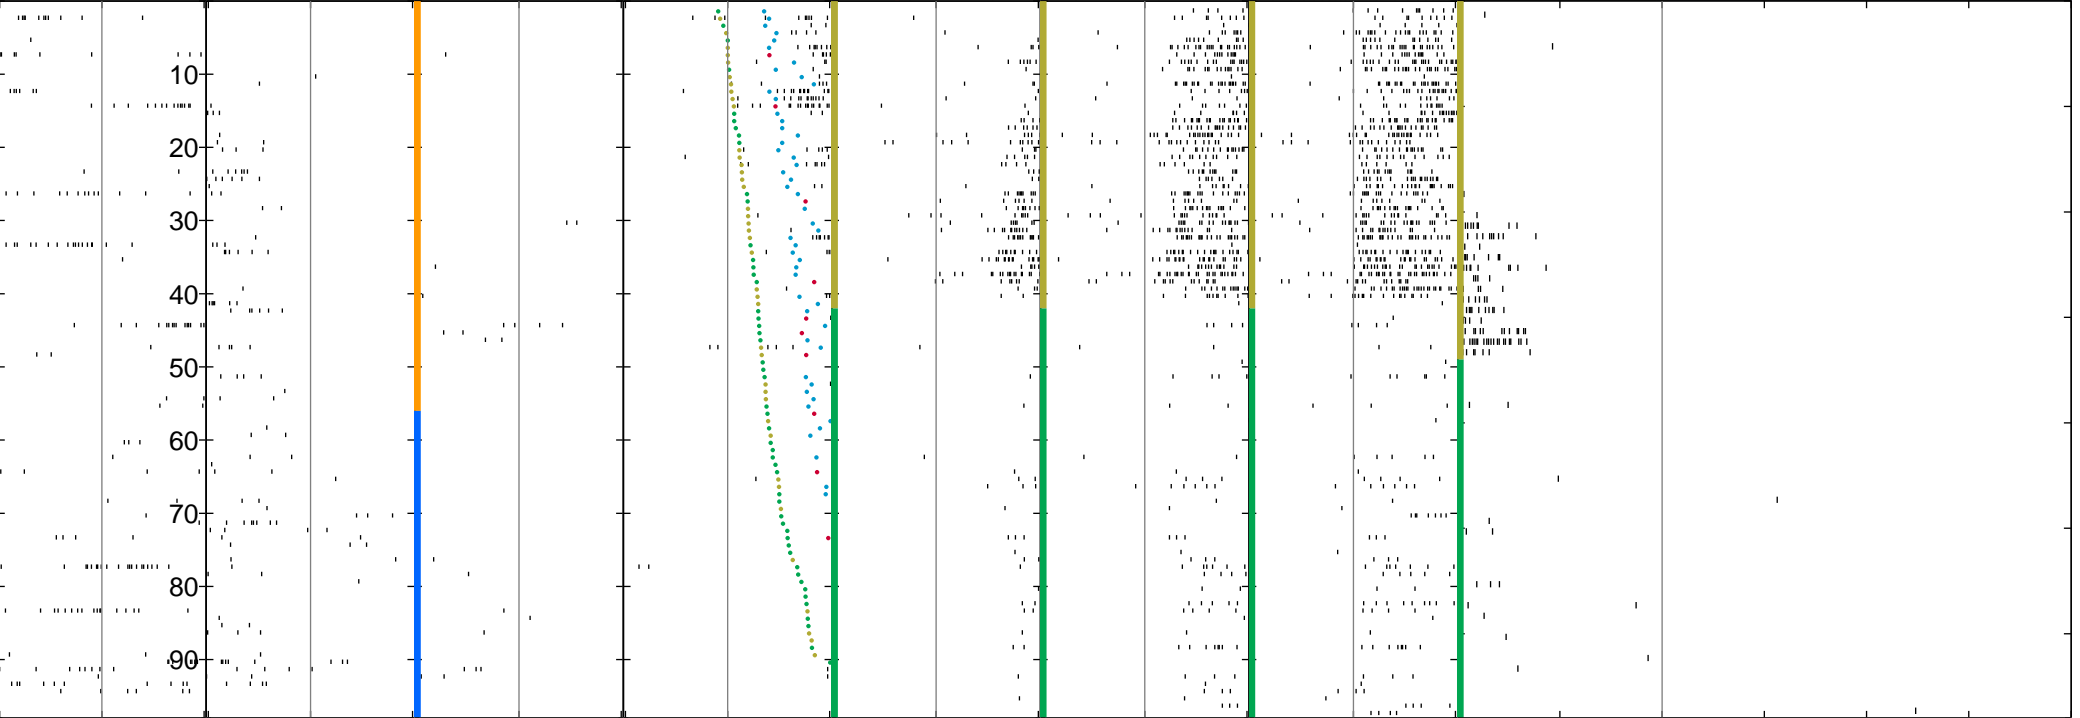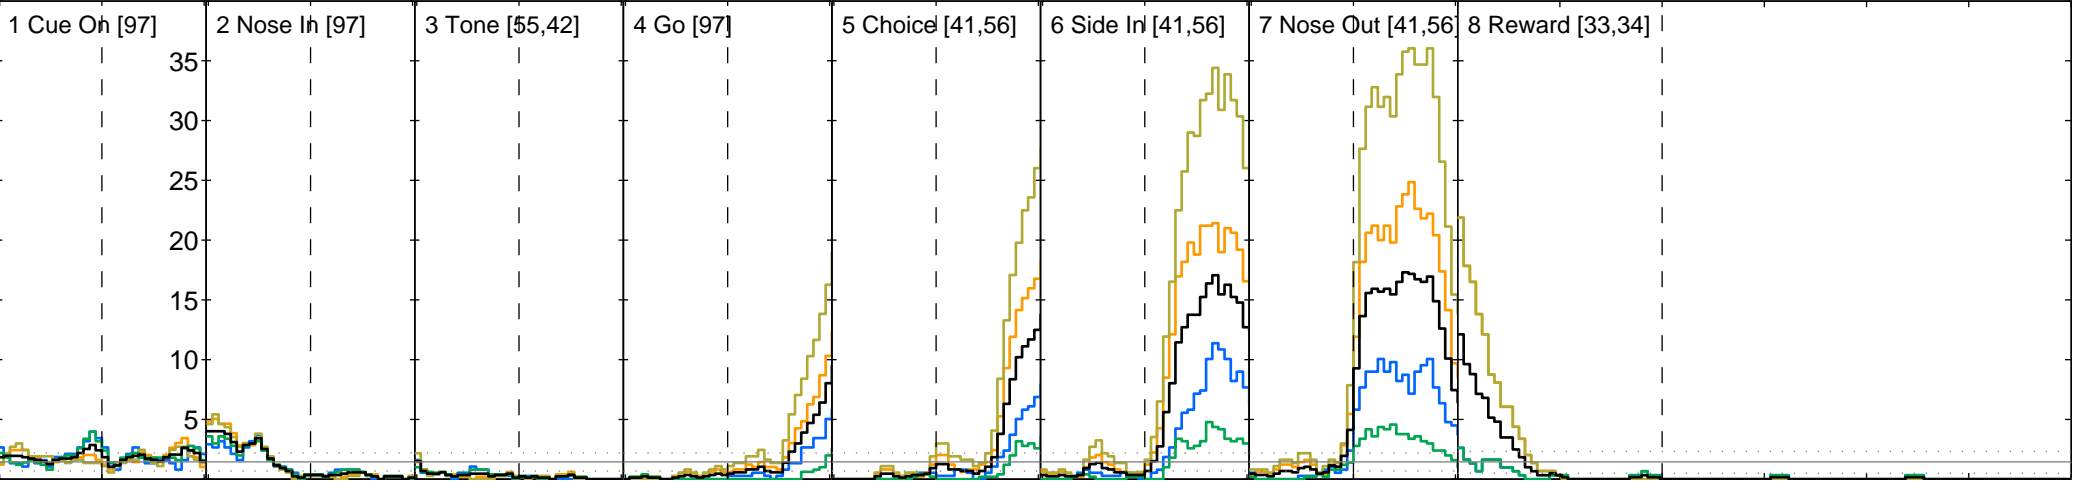

**Cell: C0320070624T07b**

AP: 0.96 ML: 3.6 DV: 6.5

w: 4 n: 8693  $P_{ISI>2}$ : 0.261/2pw: 274 $\mu$ s p $\rightarrow$ v: 790 $\mu$ s $\beta_T$ : 2.2  $\beta_D$ : 3.3 $\beta_P$ : 2.7 SI: 0.94

Session FR: 2.33 Hz

Pk Ev: 7 - Nose out (Ipsi)

Pk FR: 8.11Hz (0.3s) **MSN**

Waveform

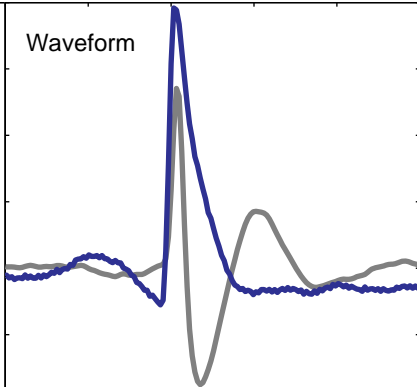

HP/PV

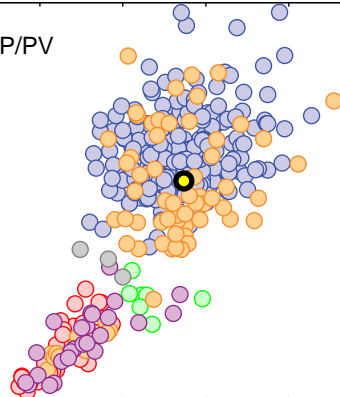

FR/PV

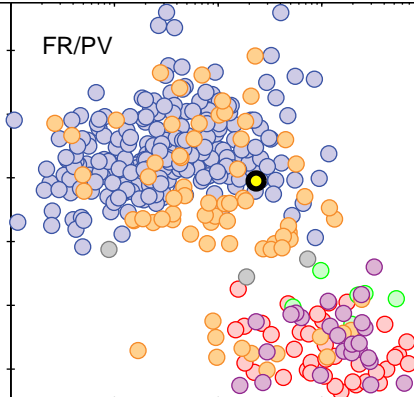

ISI Histogram [188]

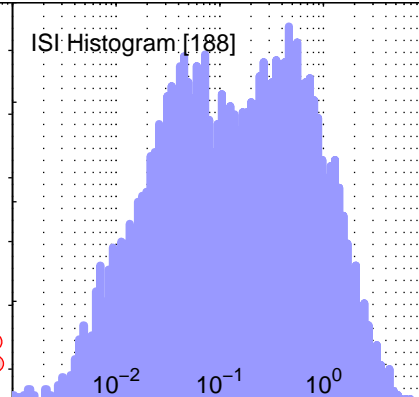

20

40

60

80

100

120

140

1 Cue On [143]

2 Nose In [143]

3 Tone [68,75]

4 Go [148]

5 Choice [69,74]

6 Side In [69,74]

7 Nose Out [69,74]

8 Reward [54,61]

8

6

4

2

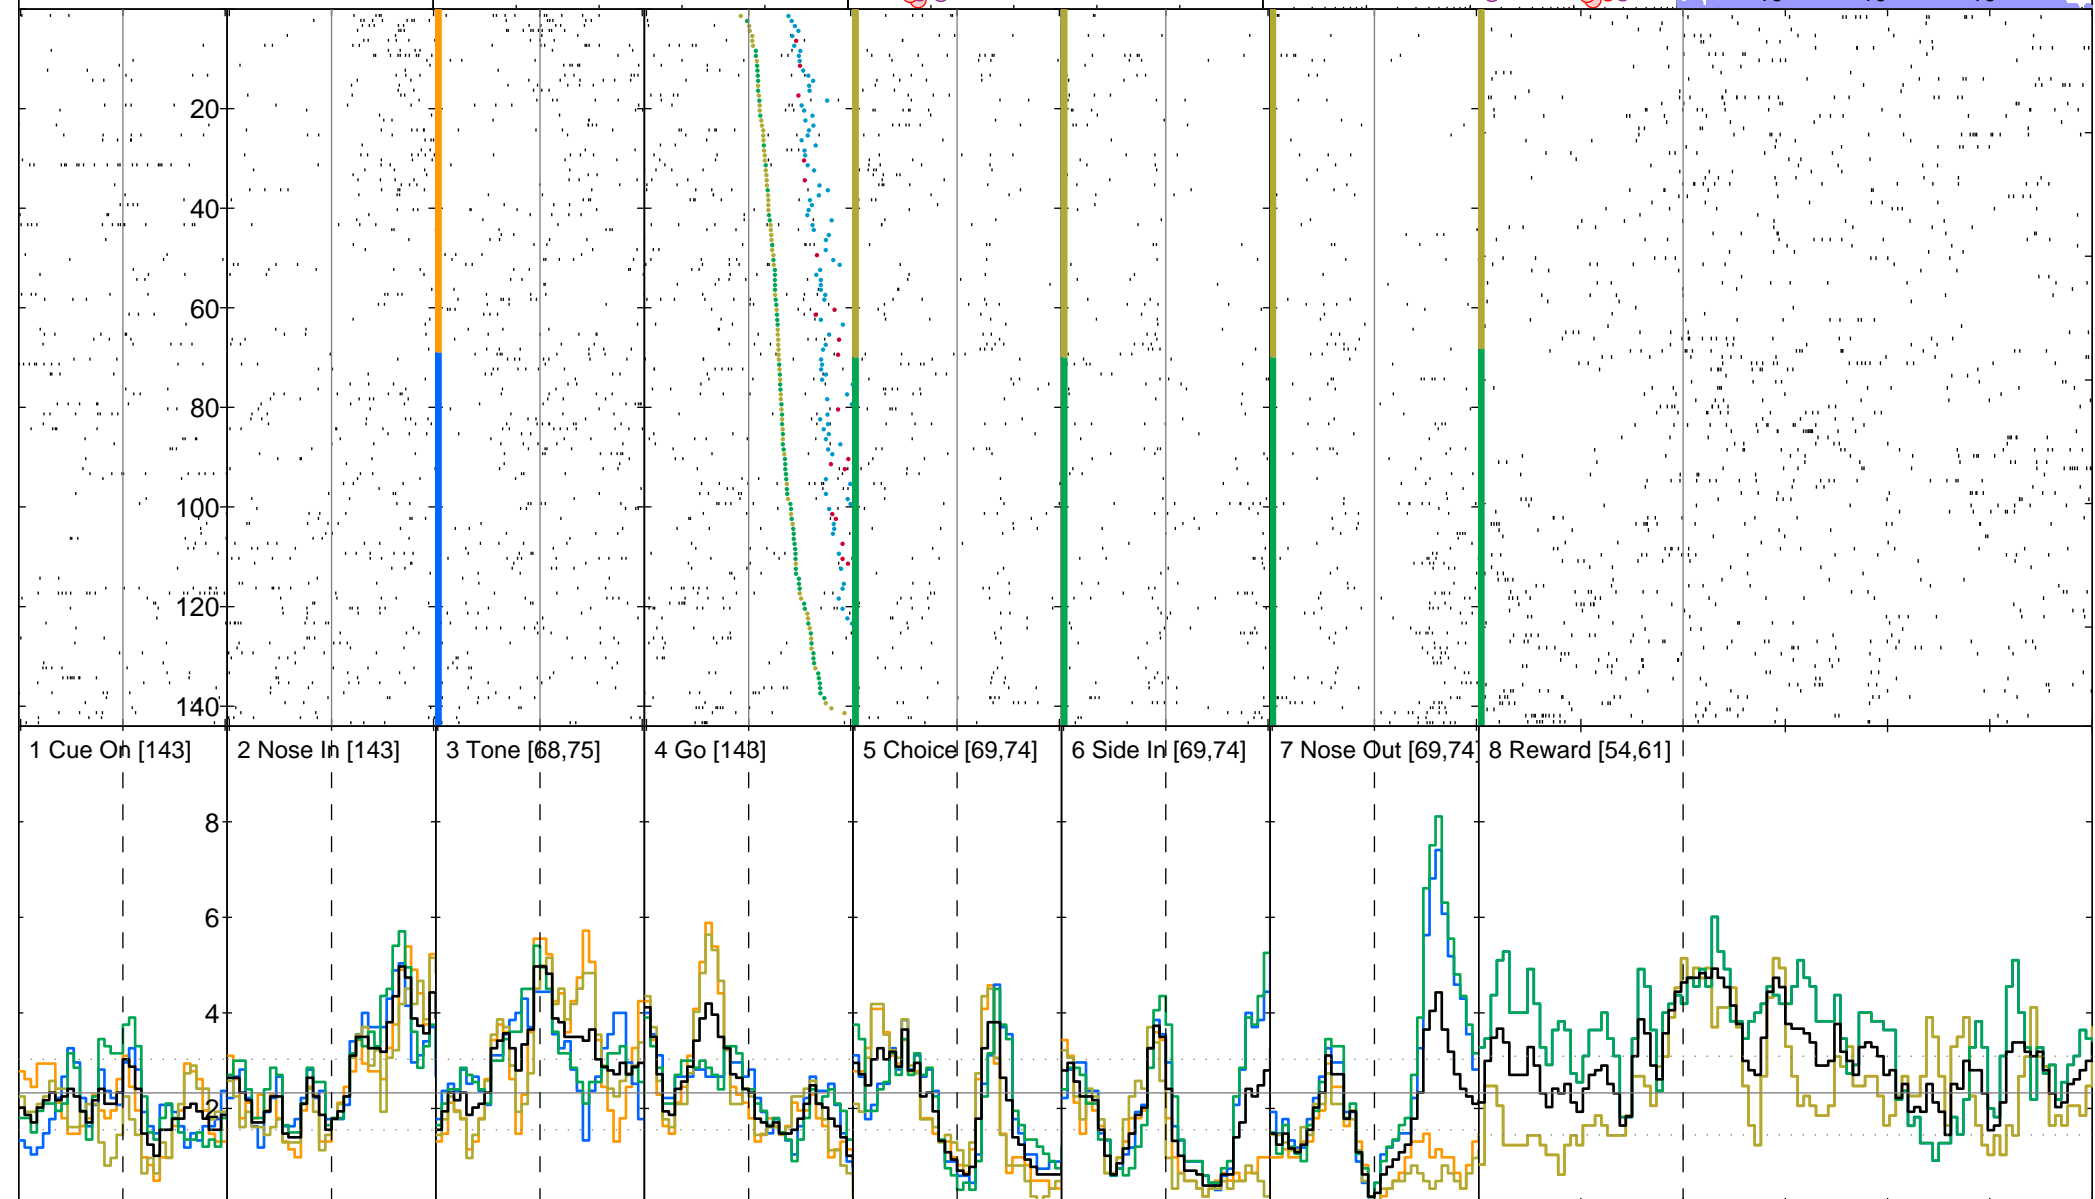

**Cell: C0520070417T07e**

AP: 1.3 ML: 3.4 DV: 4.5

w: 2 n: 1573  $P_{ISI>2}$ : 0.91/2pw: 267 $\mu$ s p->v: 829 $\mu$ s $\beta_T$ : -2.4  $\beta_D$ : -2.5 $\beta_P$ : -2.2 SI: -0.89

Session FR: 0.482 Hz

Pk Ev: 7 - Nose out (Contra)

Pk FR: 10.1Hz (0.3s) **MSN**

Waveform

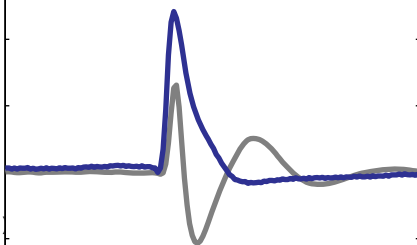

HP/PV

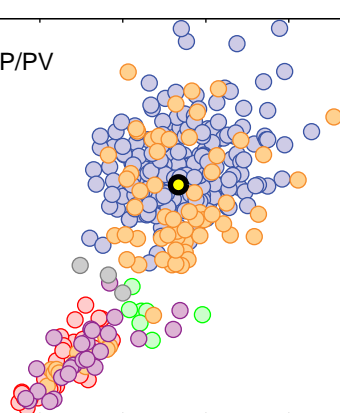

FR/PV

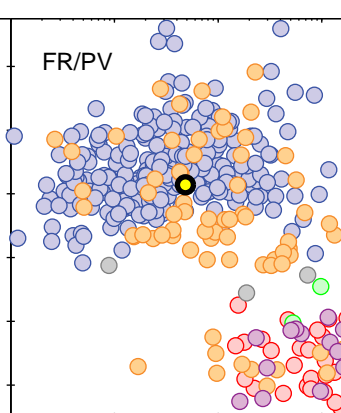

ISI Histogram [29]

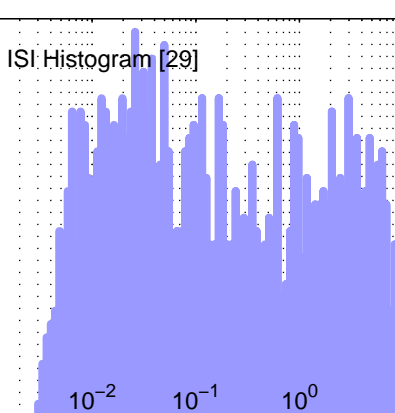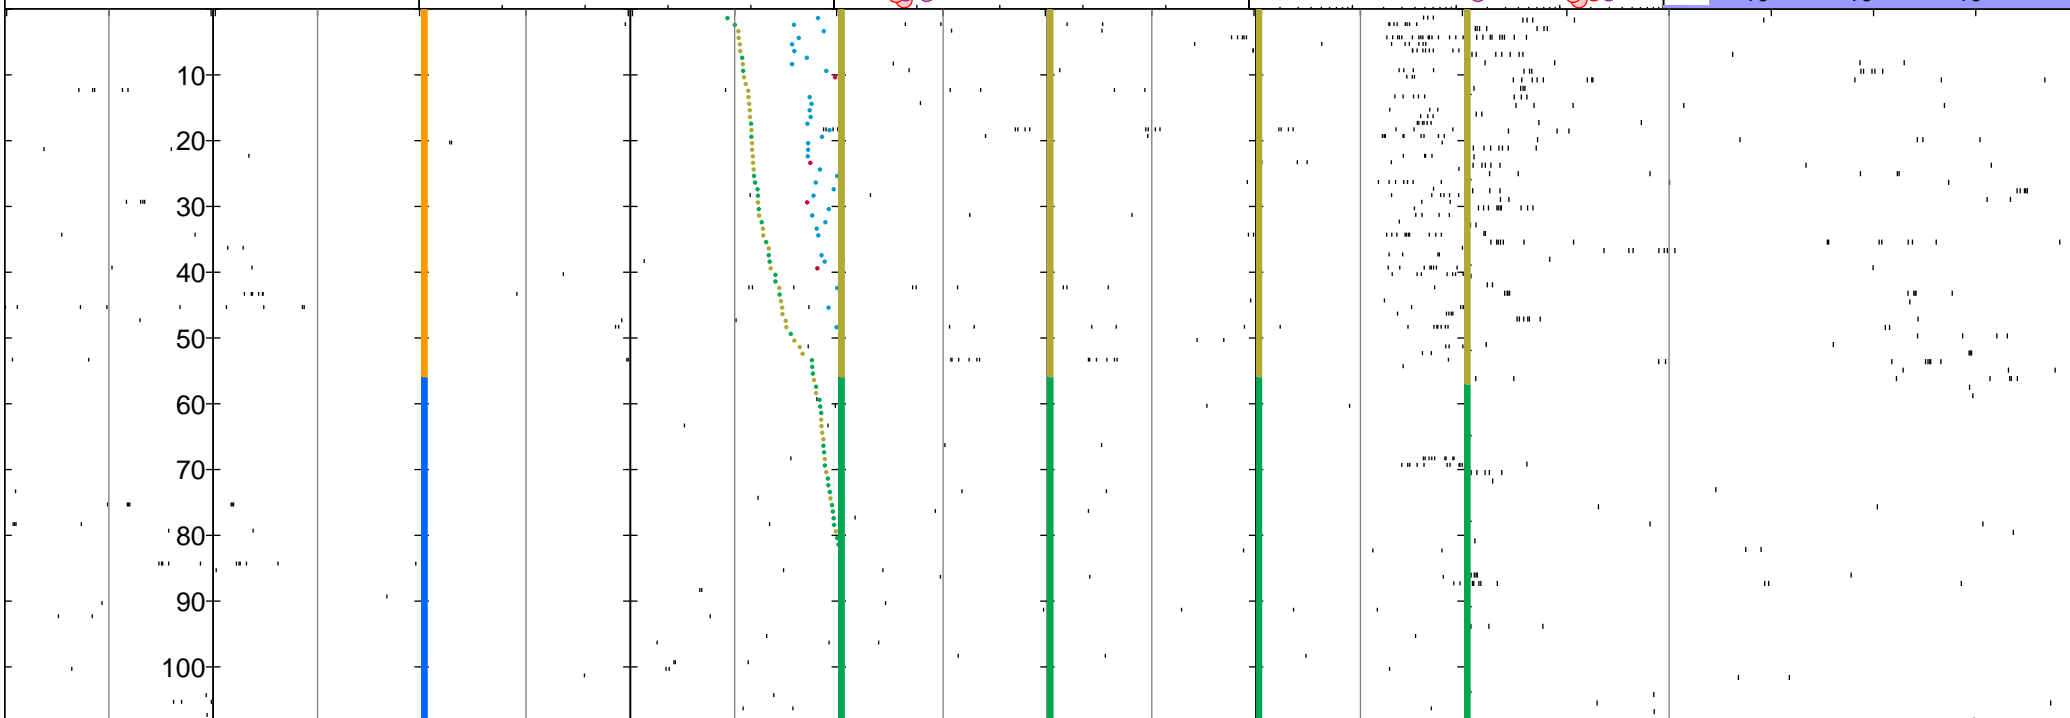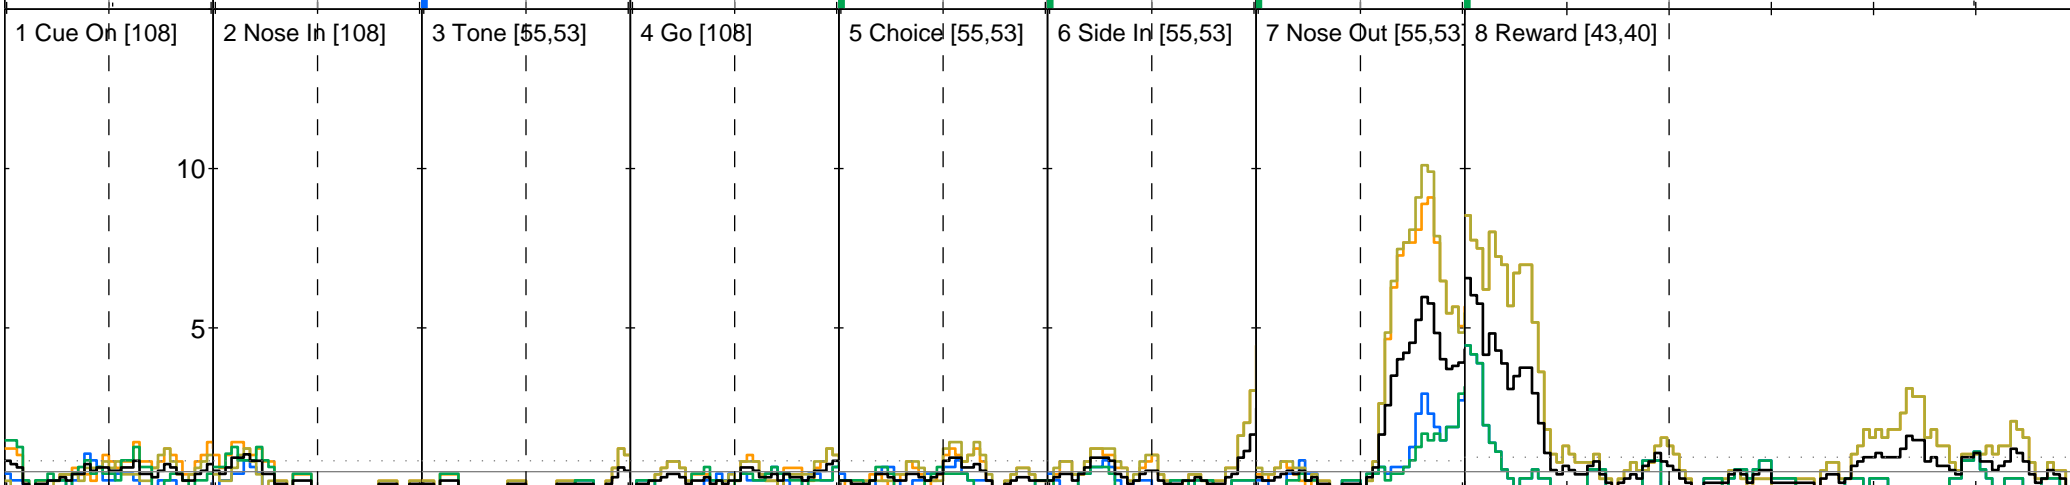

**Cell: C0320070611T07a**

AP: 0.96 ML: 3.6 DV: 5.1  
w: 2 n: 7098  $P_{ISI>2}$ : 0.75  
1/2pw: 299 $\mu$ s p->v: 938 $\mu$ s  
 $\beta_T$ : -1.8  $\beta_D$ : -1.3  
 $\beta_P$ : 2.1 SI: -1  
Session FR: 0.948 Hz  
Pk Ev: 7 - Nose out (Contra)  
Pk FR: 17.4Hz (0.42s) **MSN**

Waveform

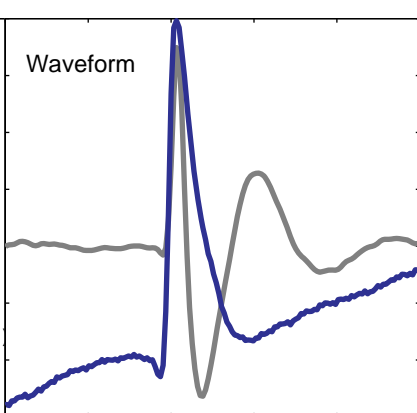

HP/PV

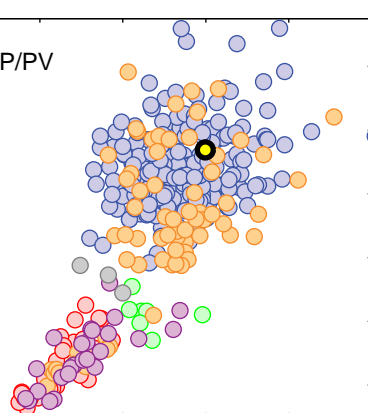

FR/PV

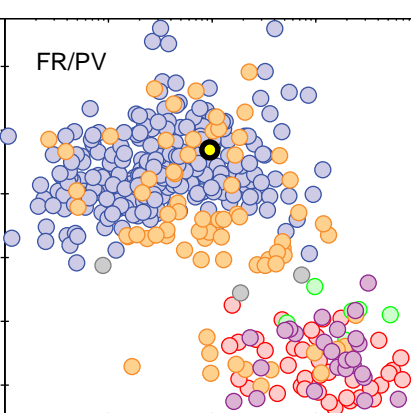

ISI Histogram [241]

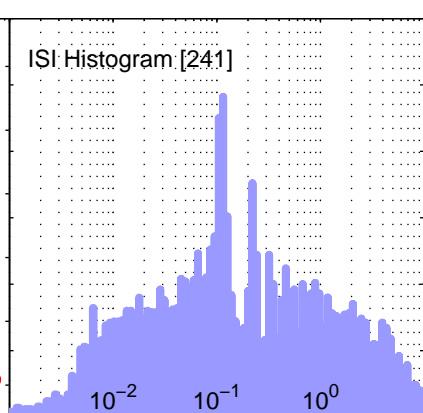

10  
20  
30  
40  
50  
60  
70  
80

1 Cue On [85] 2 Nose In [85] 3 Tone [50,35] 4 Go [85] 5 Choice [39,46] 6 Side In [39,46] 7 Nose Out [39,46] 8 Reward [33,29]

15  
10  
5

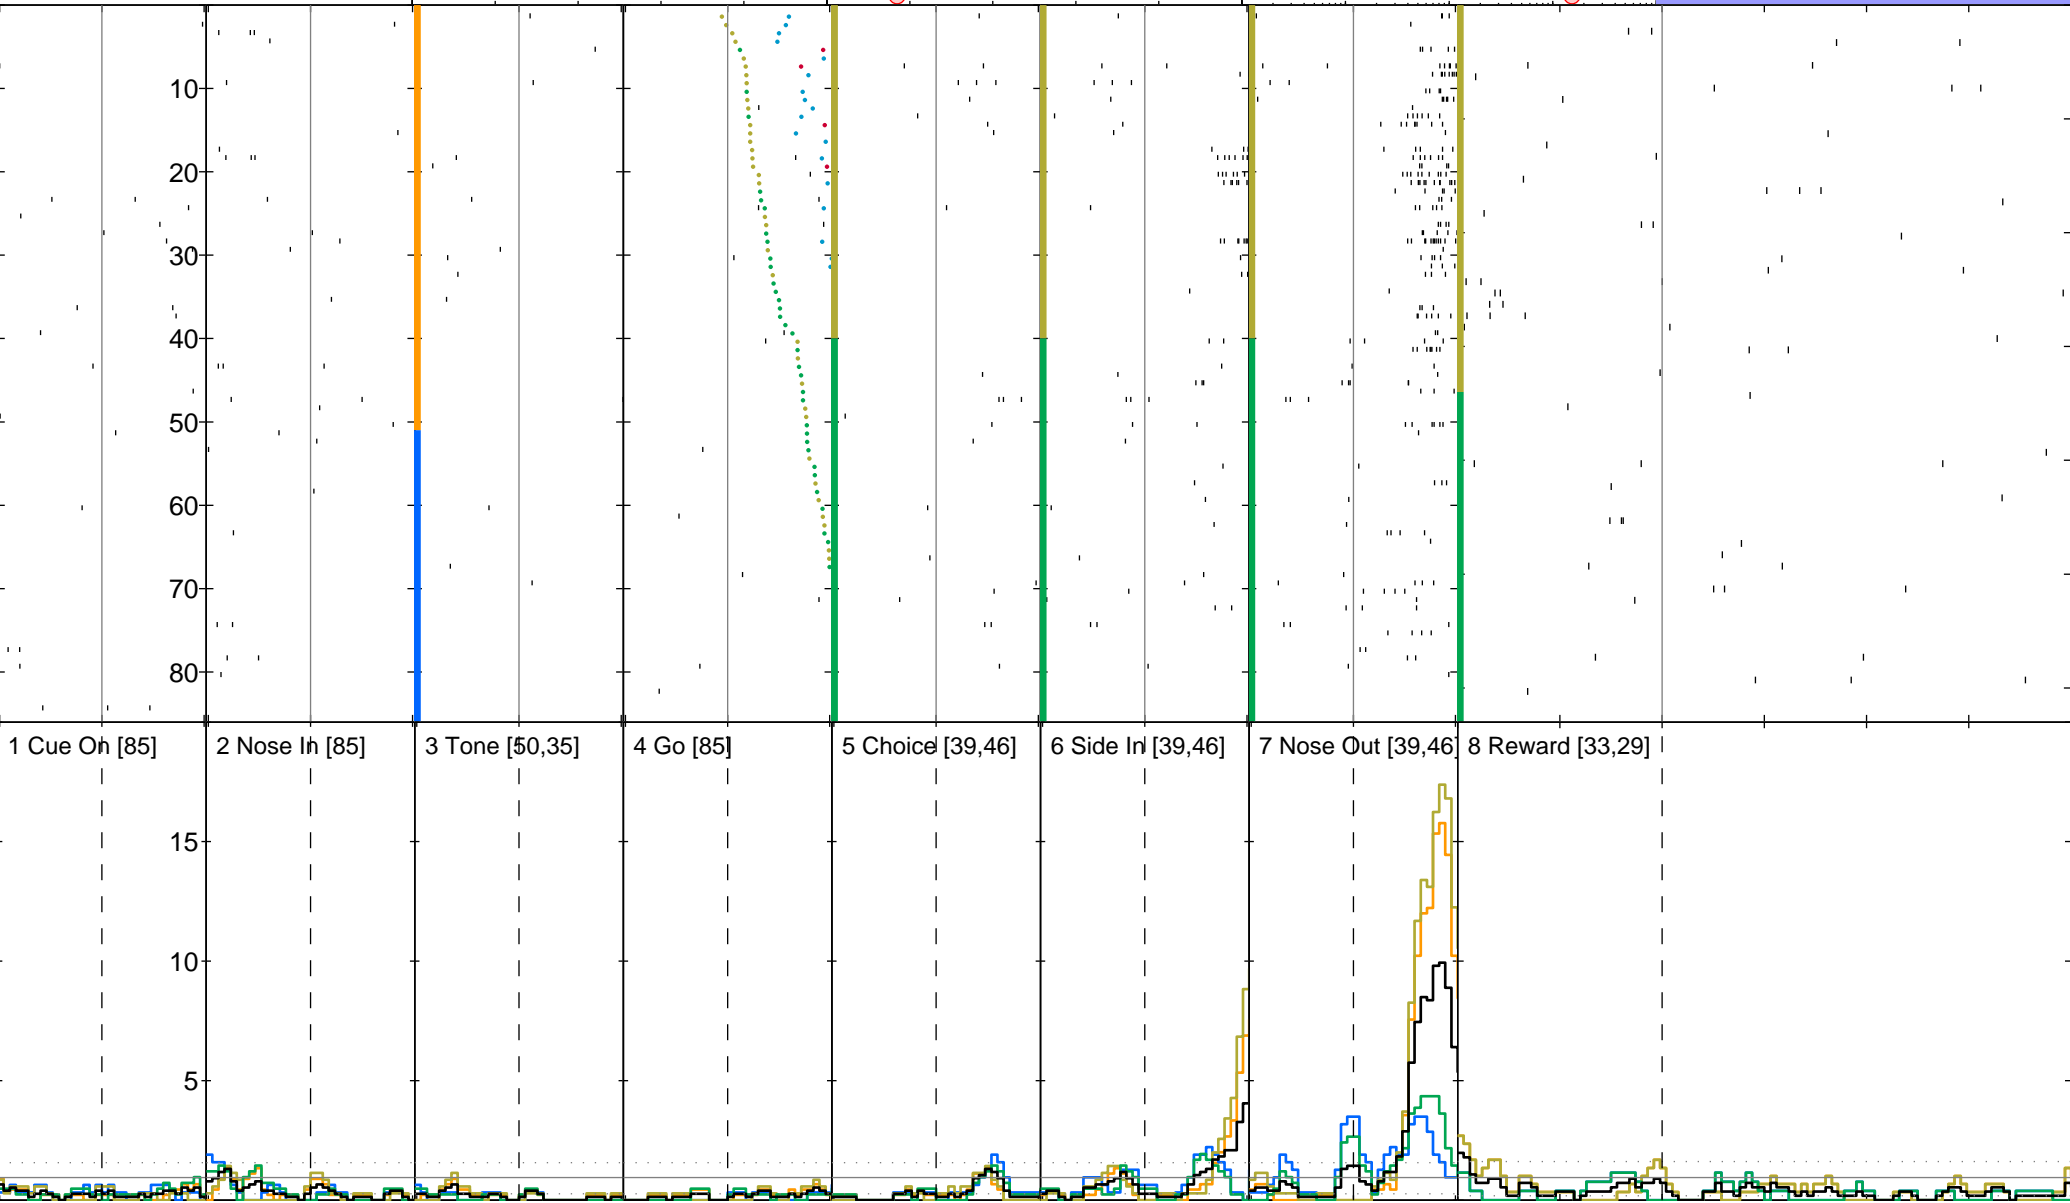



Cell: C0320070611T07c

AP: 0.96 ML: 3.6 DV: 5.1

w: 3 n: 8371  $P_{ISI>2}$ : 0.64

1/2pw: 278 $\mu$ s p->v: 886 $\mu$ s

$\beta_T$ : 1.4  $\beta_D$ : 2.5

$\beta_P$ : 1.8 SI: 0.24

Session FR: 1.12 Hz

Pk Ev: 7 - Nose out (Contra)

Pk FR: 17.1Hz (0.48s) MSN

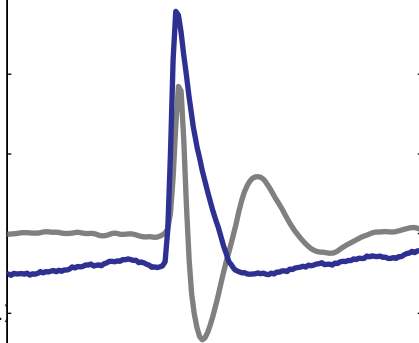

HP/PV

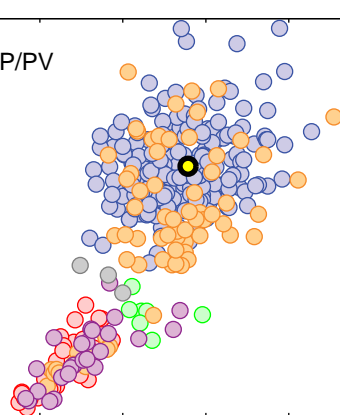

FR/PV

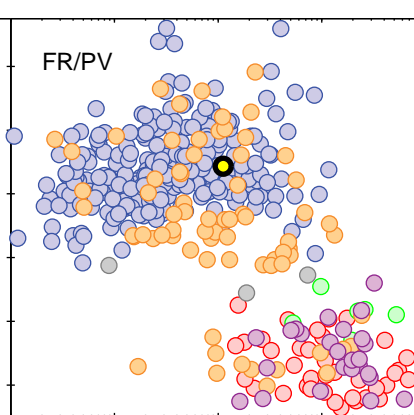

ISI Histogram [165]

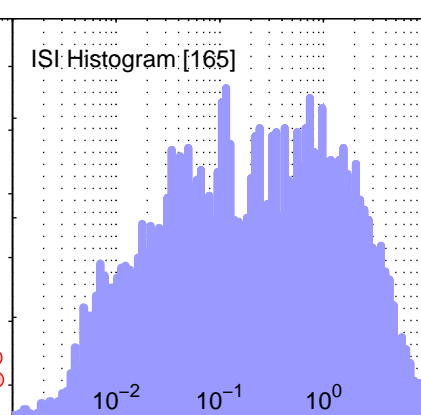

10  
20  
30  
40  
50  
60  
70  
80

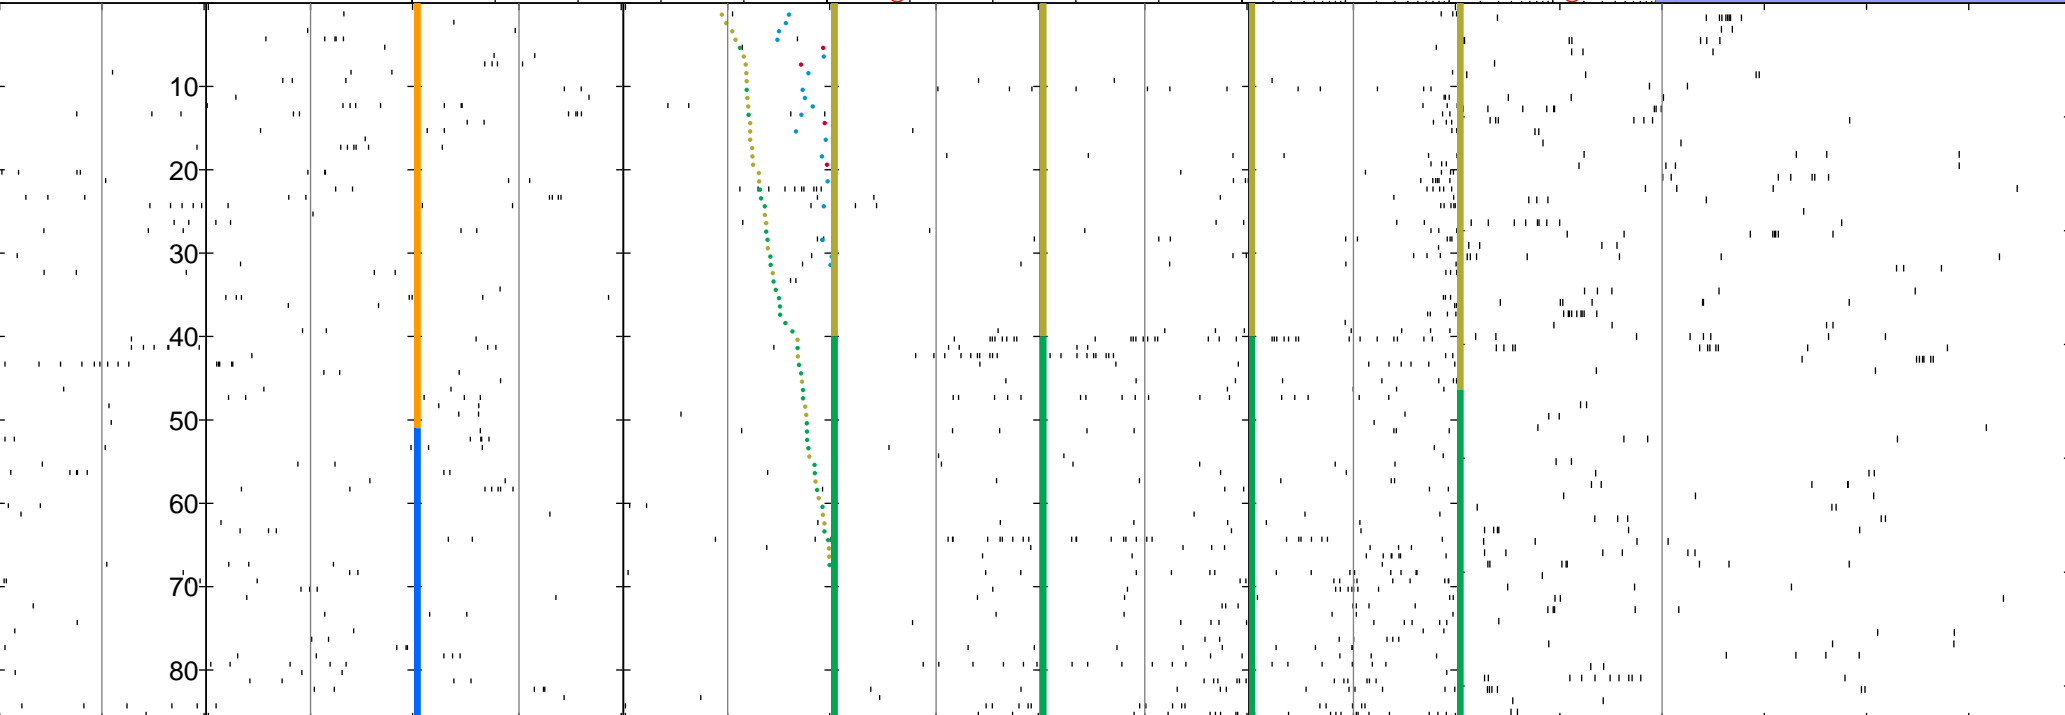

1 Cue On [85] 2 Nose In [85] 3 Tone [50,35] 4 Go [85] 5 Choice [39,46] 6 Side In [39,46] 7 Nose Out [39,46] 8 Reward [33,29]

15  
10  
5

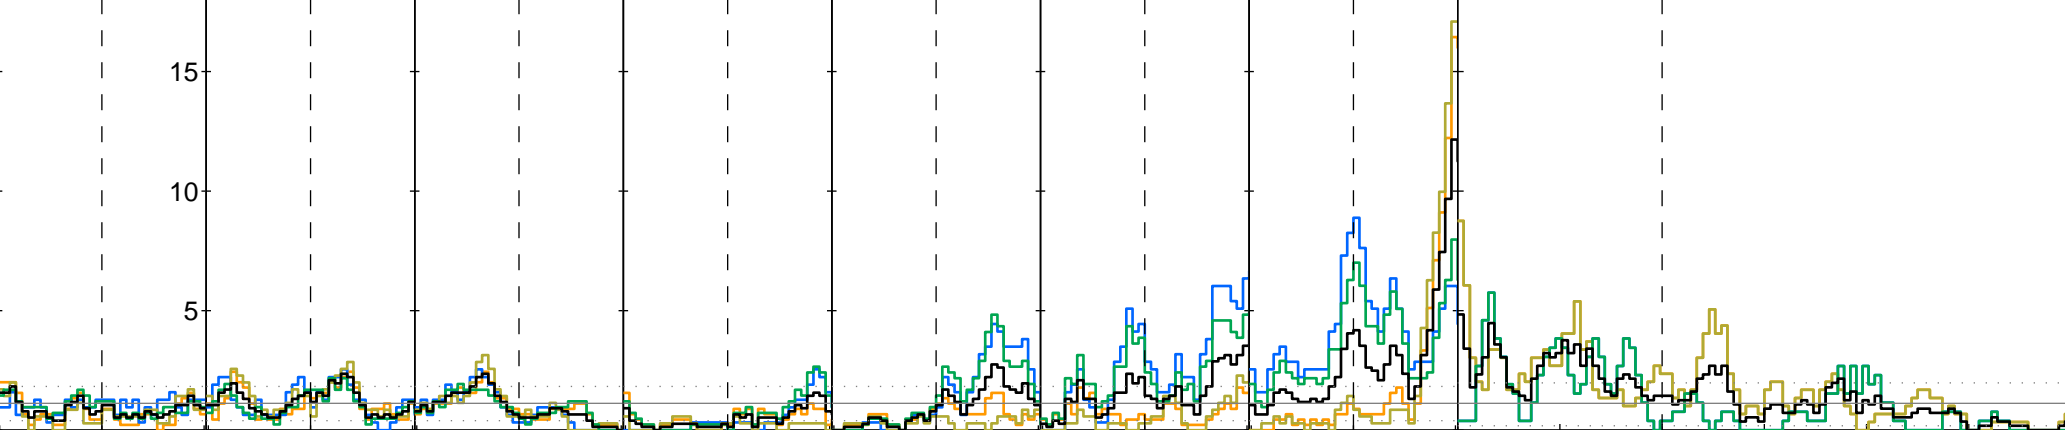

**Cell: C0320070611T09e**

AP: 1.6 ML: 3.7 DV: 4.7  
w: 3 n: 1951  $P_{ISI>2}$ : 0.92  
1/2pw: 227 $\mu$ s p->v: 736 $\mu$ s  
 $\beta_T$ : NaN  $\beta_D$ : NaN  
 $\beta_P$ : NaN SI: NaN  
Session FR: 0.261 Hz  
Pk Ev: 7 - Nose out (Contra)  
Pk FR: 5.13Hz (0.48s) **MSN**

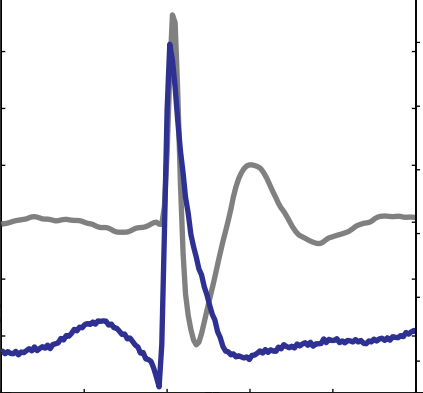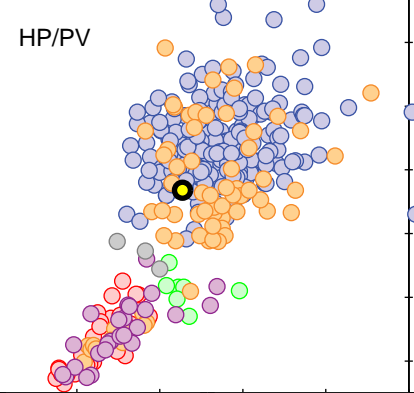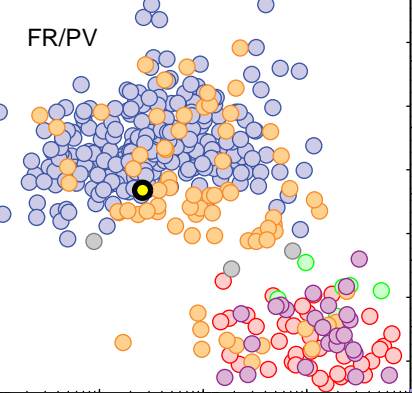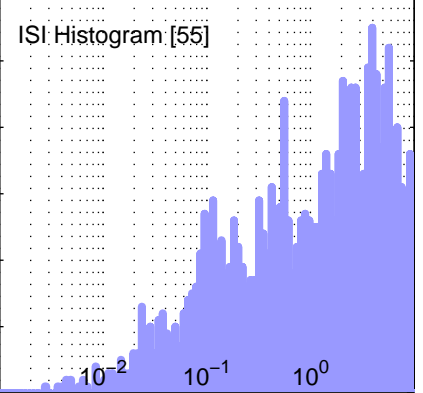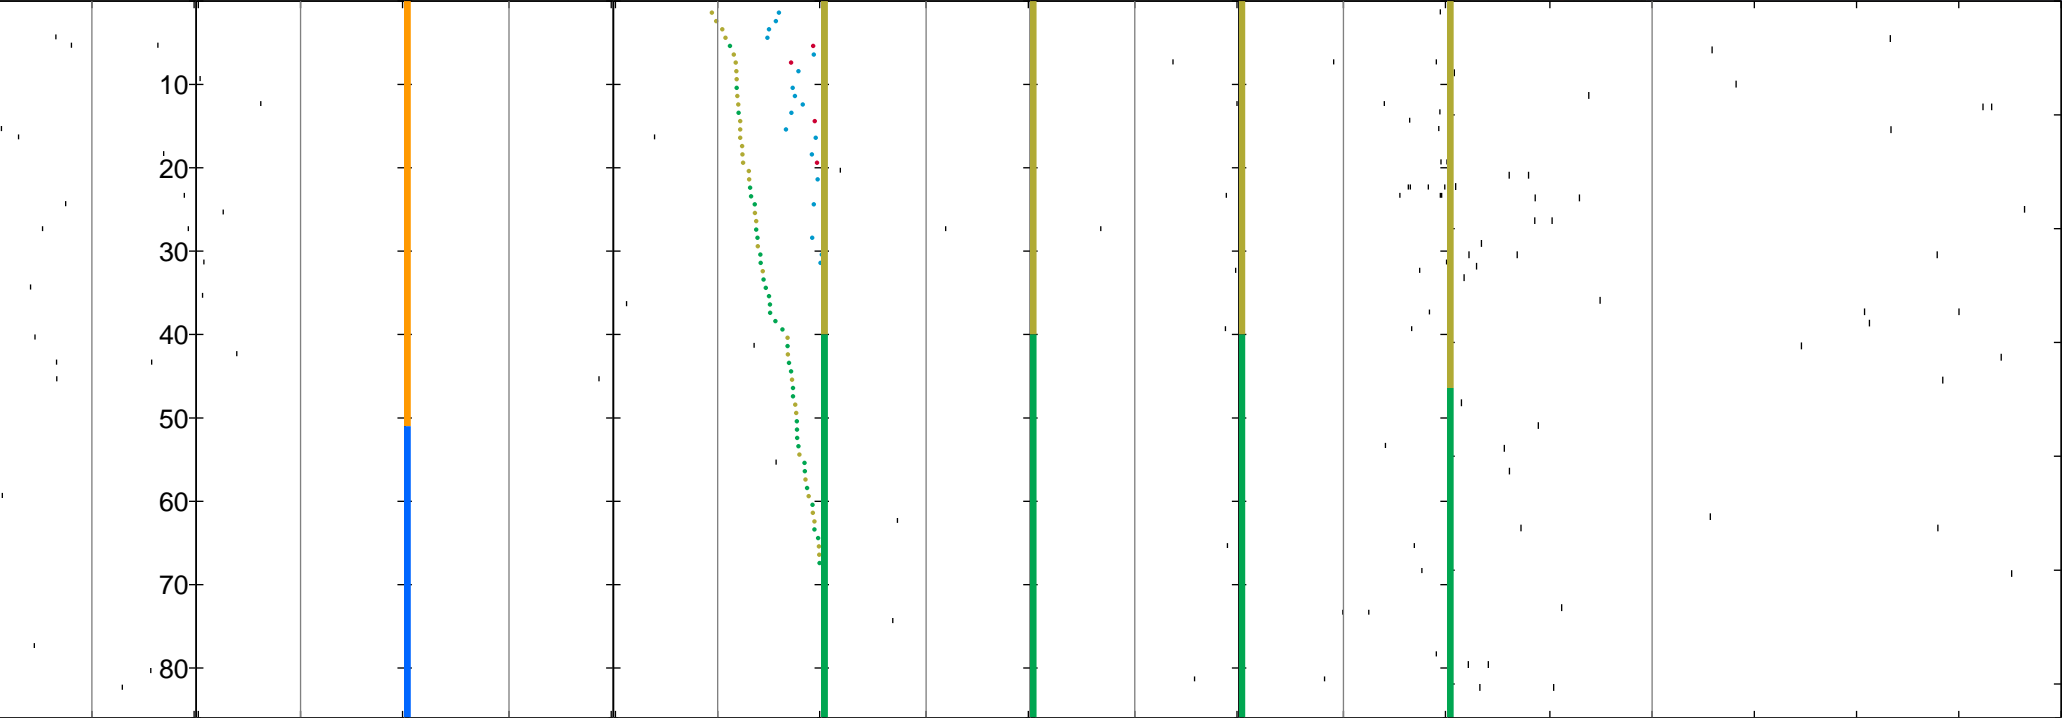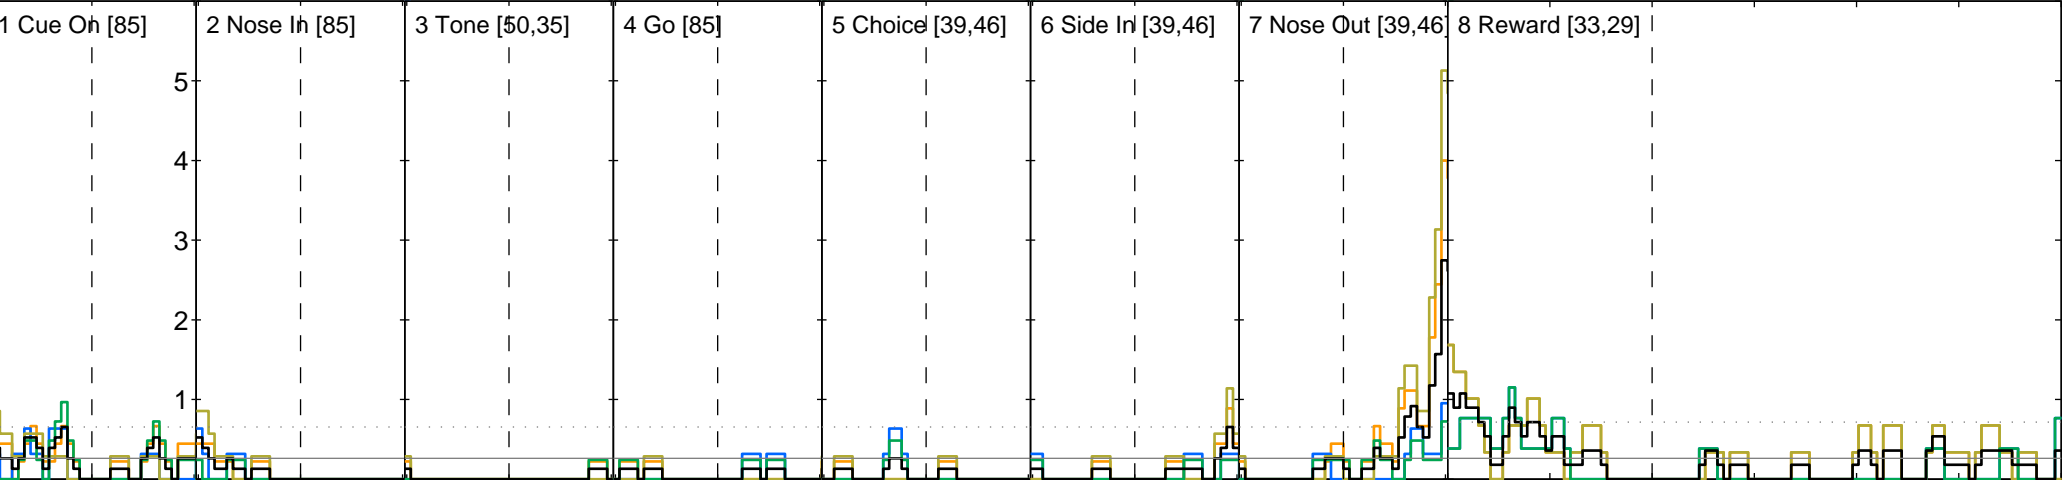

Cell: C0320070619T07g

AP: 0.96 ML: 3.6 DV: 5.8

w: 4 n: 1341  $P_{ISI>2}$ : 0.98

1/2pw: 173 $\mu$ s p $\rightarrow$ v: 946 $\mu$ s

$\beta_T$ : -2.6  $\beta_D$ : -3.3

$\beta_P$ : -1.9 SI: -1

Session FR: 0.317 Hz

Pk Ev: 7 - Nose out (Contra)

Pk FR: 20.8Hz (0.48s) MSN

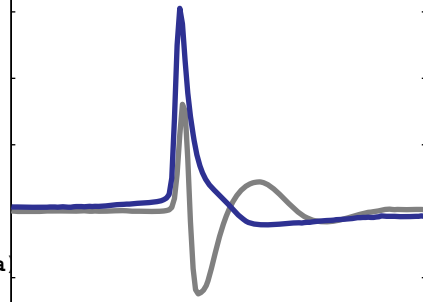

HP/PV

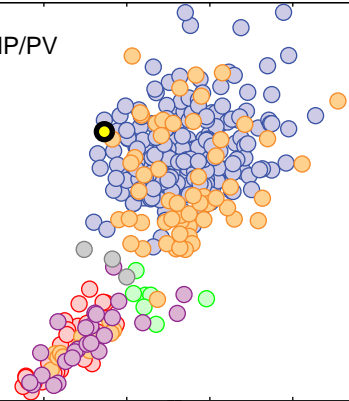

FR/PV

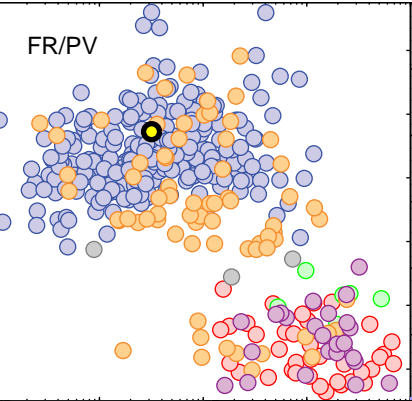

ISI Histogram [42]

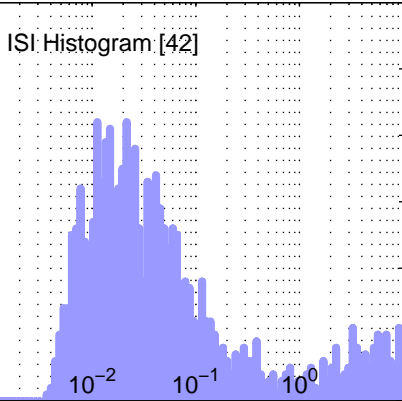

10  
20  
30  
40  
50  
60  
70  
80  
90

1 Cue On [94] 2 Nose In [94] 3 Tone [50,44] 4 Go [94] 5 Choice [47,47] 6 Side In [47,47] 7 Nose Out [47,47] 8 Reward [34,32]

25  
15  
10  
5

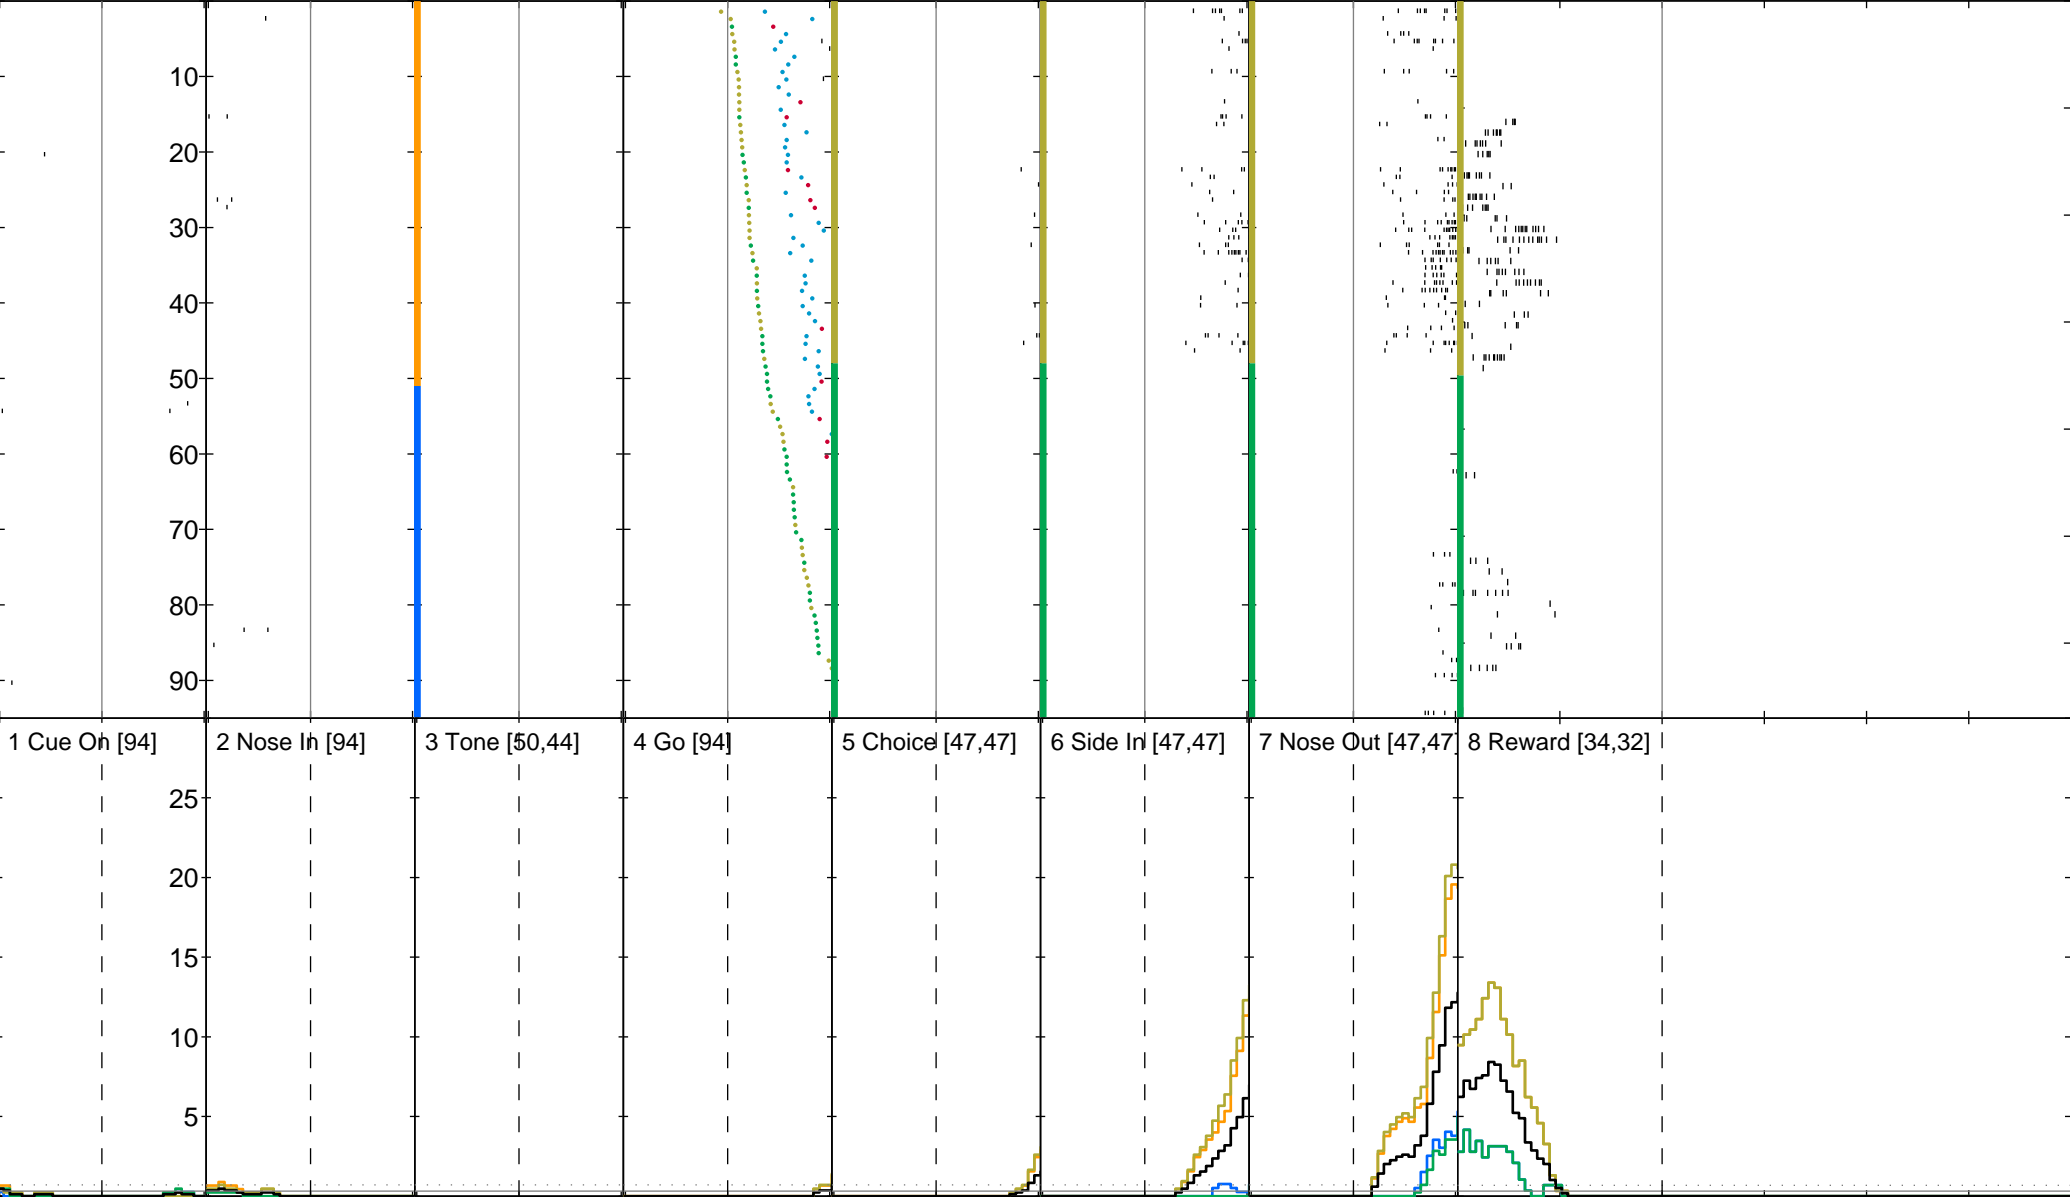

**Cell: C1220071024T05a**

AP: 1.4 ML: 2.1 DV: 6.9  
w: 2 n: 15151  $P_{ISI>2}$ : 0.8  
1/2pw: 371 $\mu$ s p->v: 981 $\mu$ s  
 $\beta_T$ : NaN  $\beta_D$ : NaN  
 $\beta_P$ : NaN SI: NaN  
Session FR: 2.08 Hz  
Pk Ev: 7 - Nose out (Tone2)  
Pk FR: 9.59Hz (0.63s) **MSN**

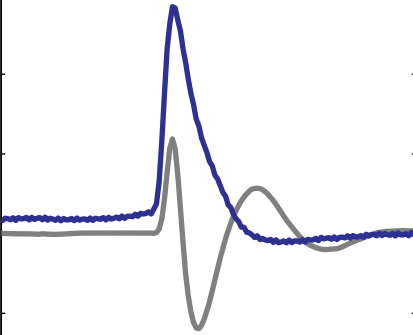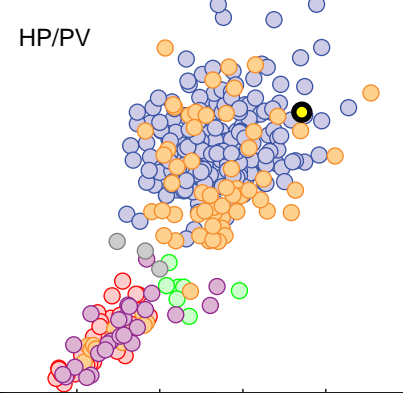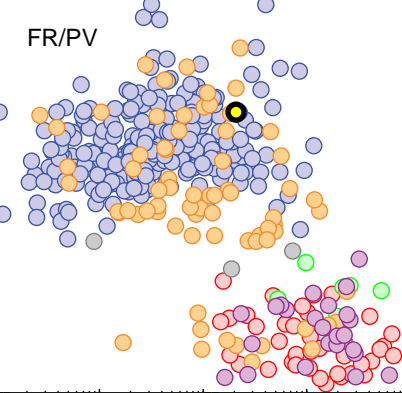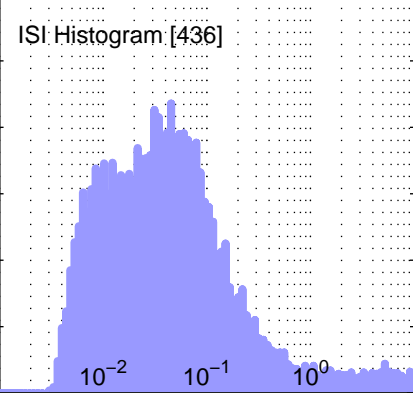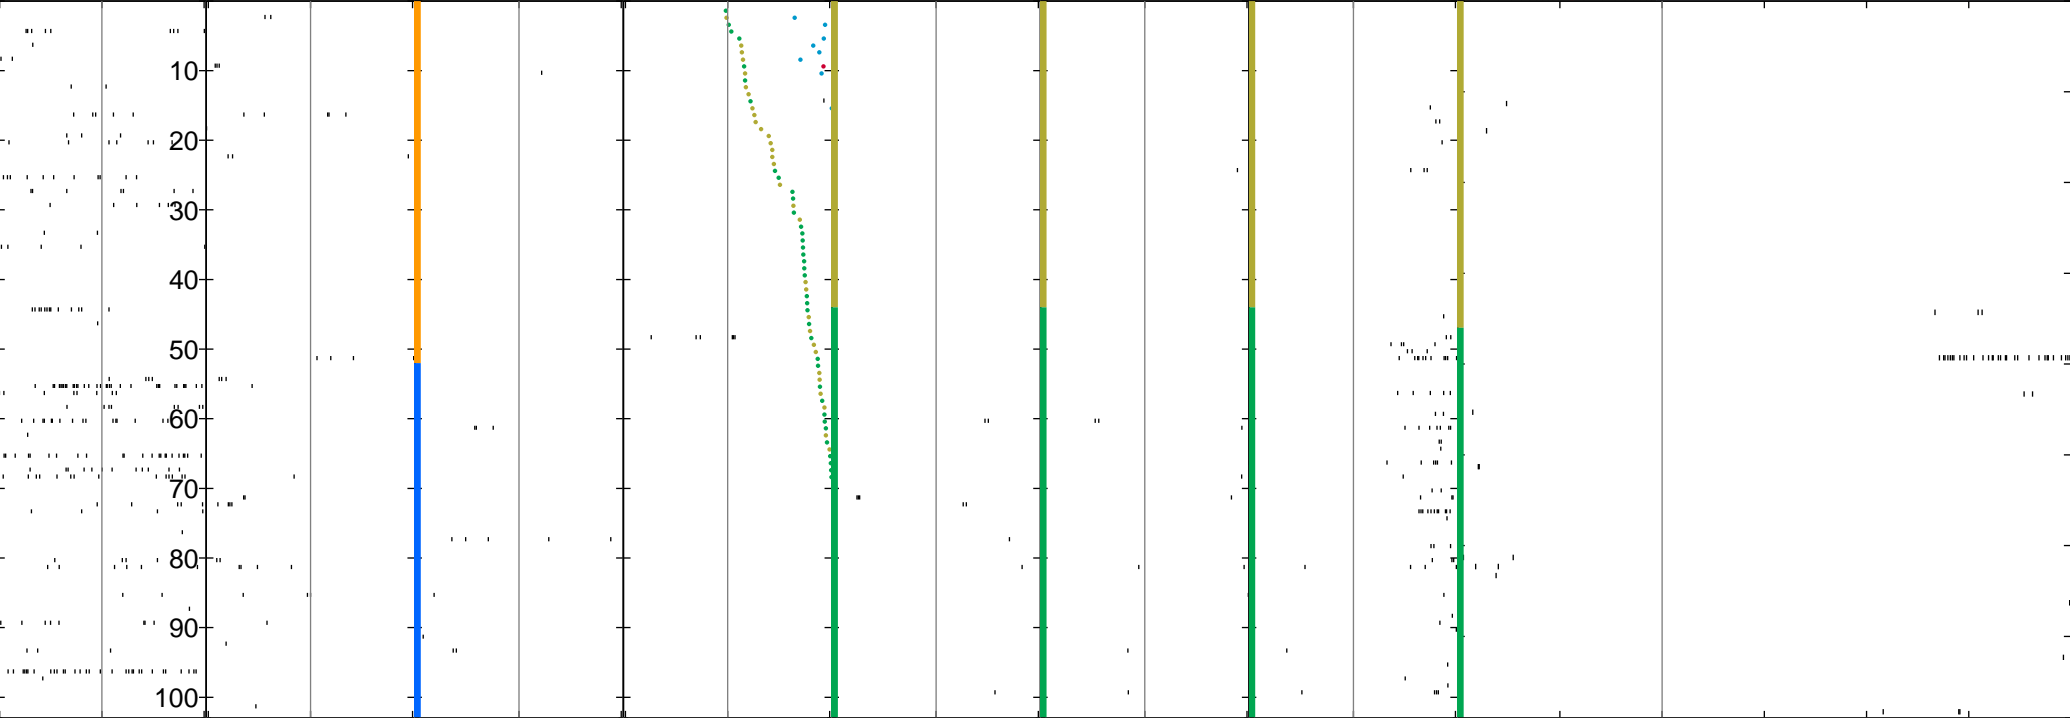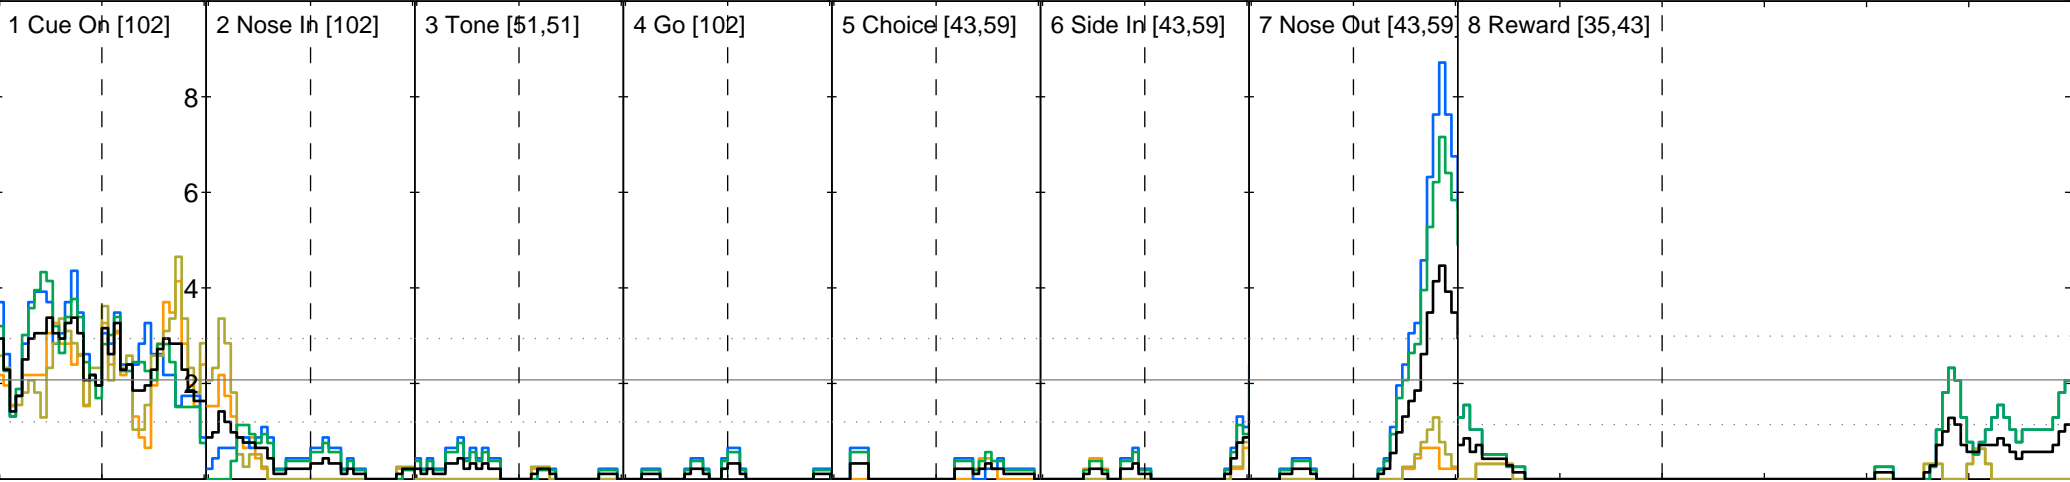

**Cell: C0320070613T07a**

AP: 0.96 ML: 3.6 DV: 5.3

w: 2 n: 880  $P_{ISI>2}$ : 0.97

1/2pw: 278 $\mu$ s p->v: 866 $\mu$ s

$\beta_T$ : -1.5  $\beta_D$ : -1.5

$\beta_P$ : 1.7 SI: -1

Session FR: 0.228 Hz

Pk Ev: 8 - Reward (T1/Con)

Pk FR: 9.15Hz (-0.97s) **MSN**

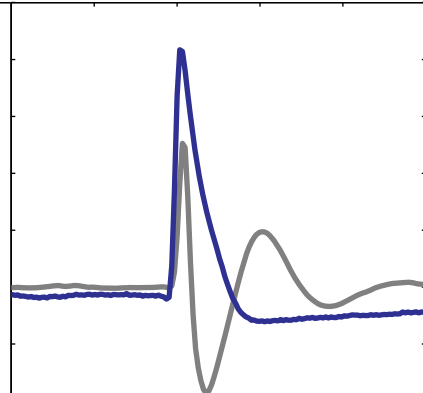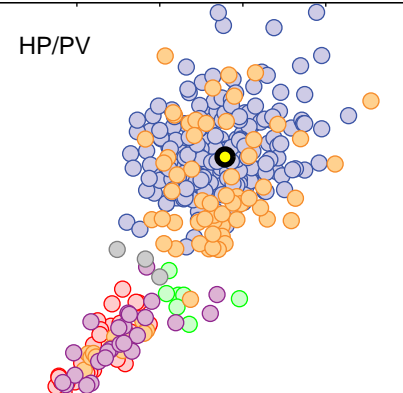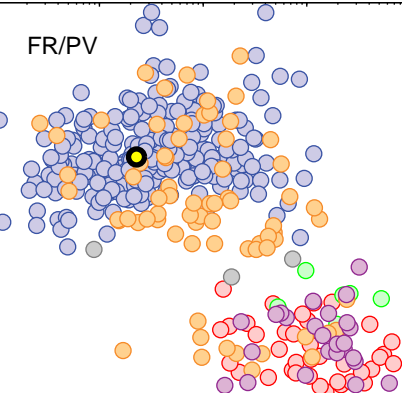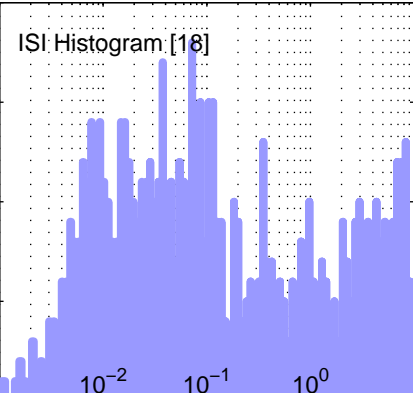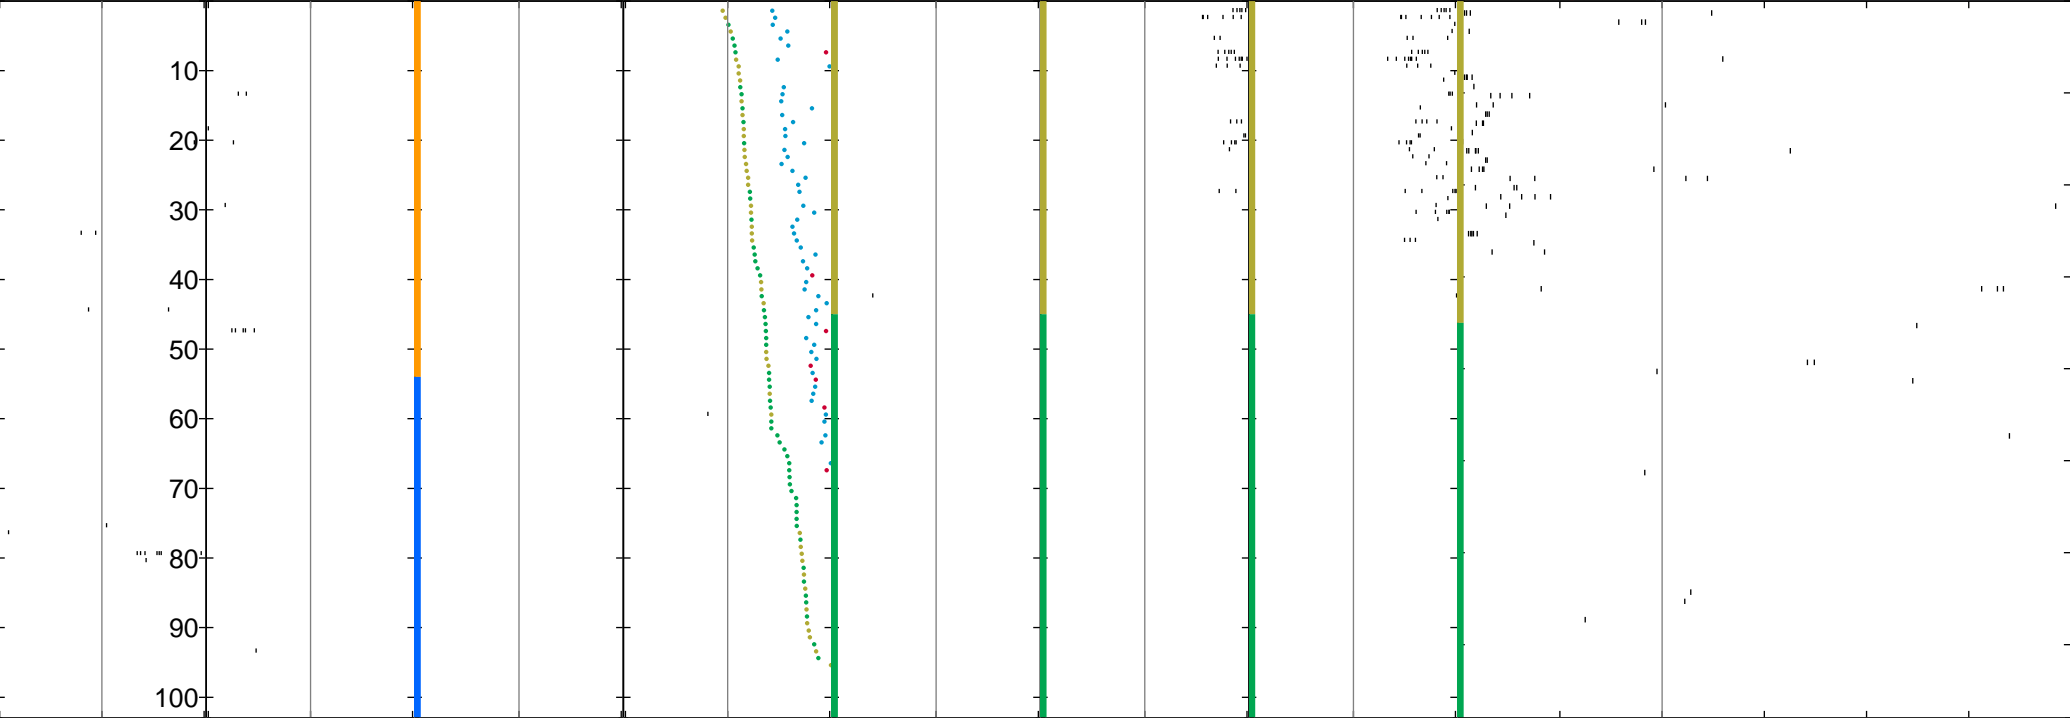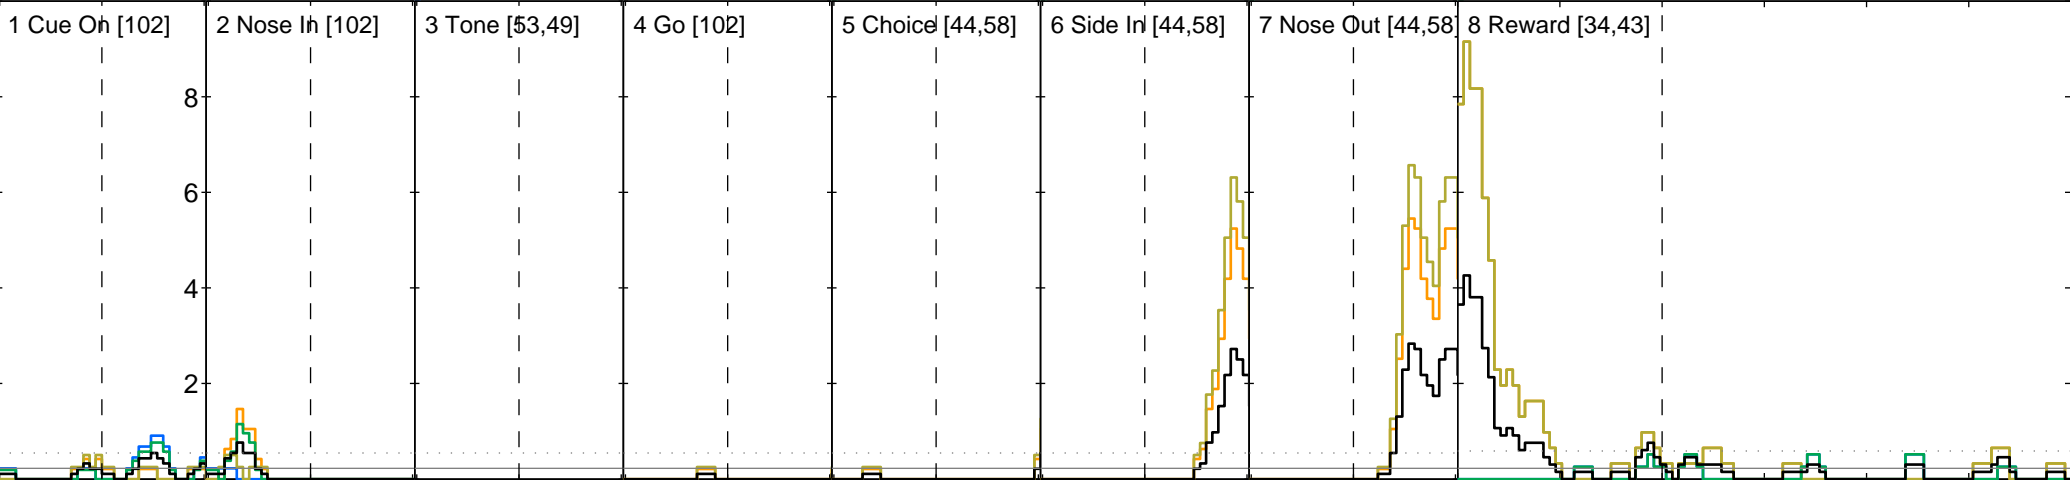

**Cell: C0320070623T07a**

AP: 0.96 ML: 3.6 DV: 6.3  
w: 3 n: 1582  $P_{ISI>2}$ : 0.93  
1/2pw: 264 $\mu$ s p->v: 981 $\mu$ s  
 $\beta_T$ : NaN  $\beta_D$ : NaN  
 $\beta_P$ : NaN SI: NaN  
Session FR: 0.417 Hz  
Pk Ev: 8 - Reward (T2/Ipsi)  
Pk FR: 5.88Hz (-0.88s) **MSN**

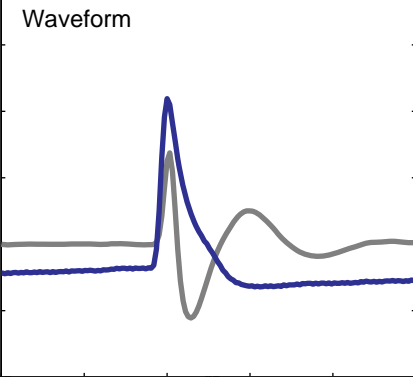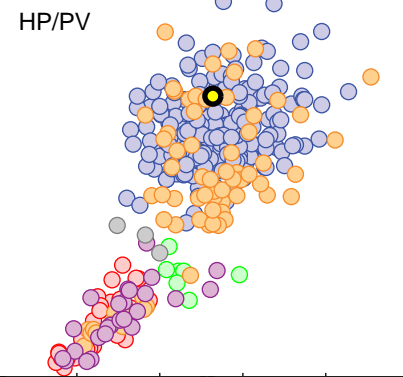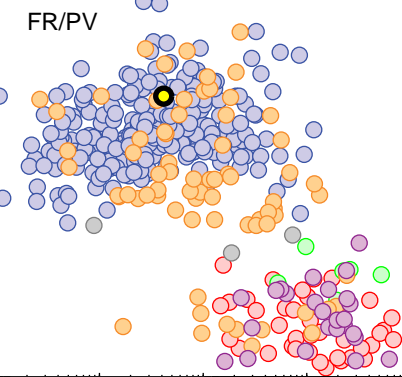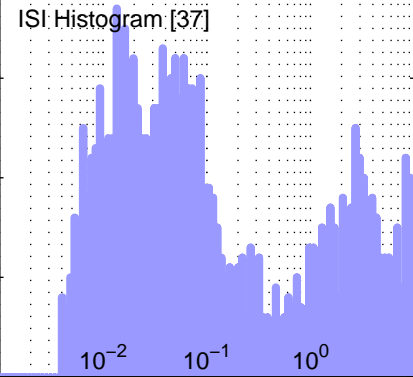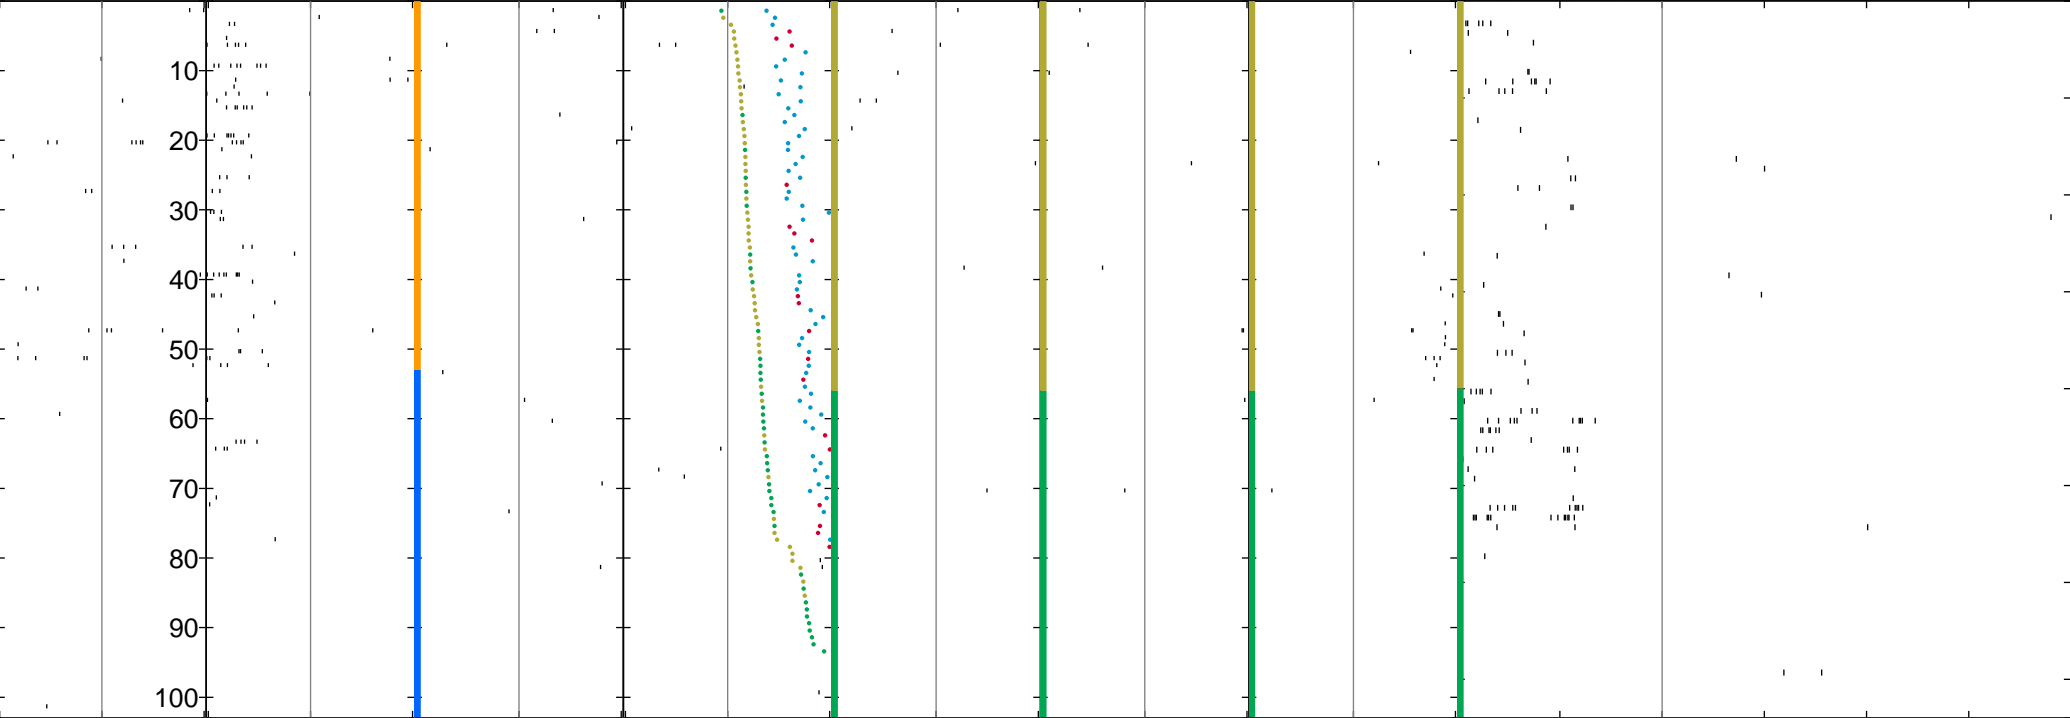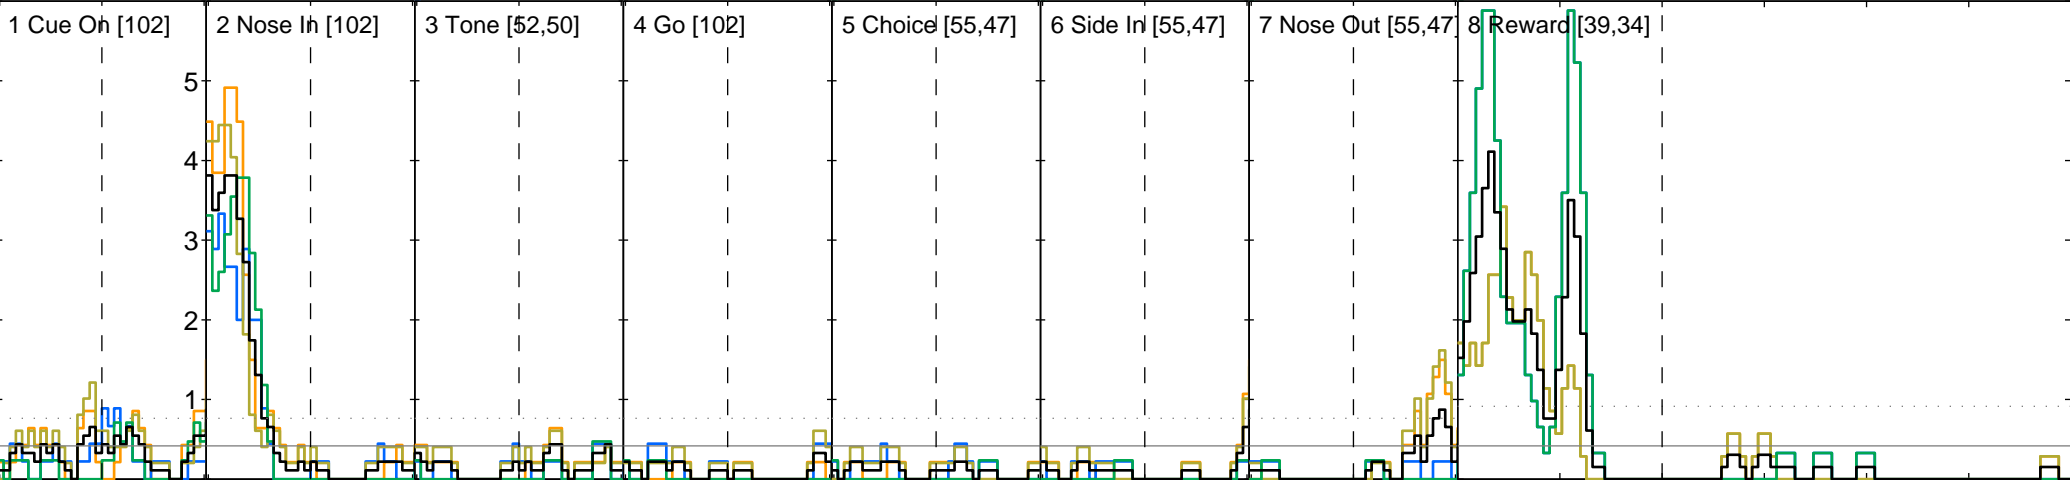



**Cell: C0520070402T09a**

AP: 0.72 ML: 2.4 DV: 4.3  
w: 1 n: 5165  $P_{ISI>2}$ : 0.72  
1/2pw: 338 $\mu$ s p $\rightarrow$ v: 832 $\mu$ s  
 $\beta_T$ : 1.7  $\beta_D$ : -5.6  
 $\beta_P$ : 3.2 SI: NaN  
Session FR: 1.13 Hz  
Pk Ev: 8 - Reward (T1/Con)  
Pk FR: 6.94Hz (-0.85s) **MSN**

Waveform

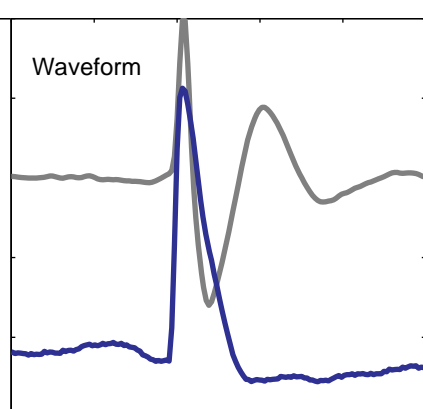

HP/PV

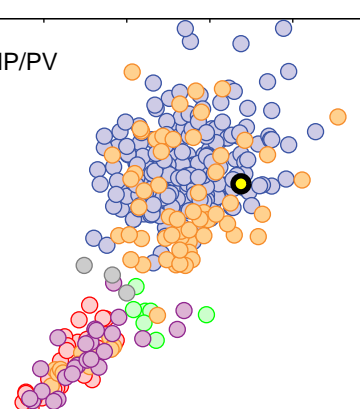

FR/PV

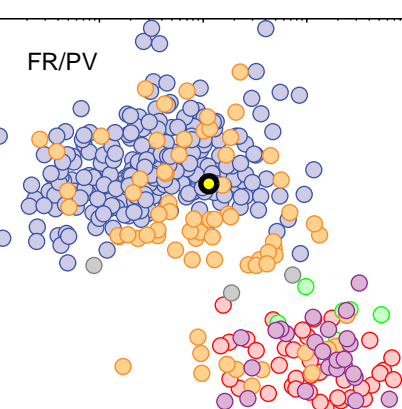

ISI Histogram [116]

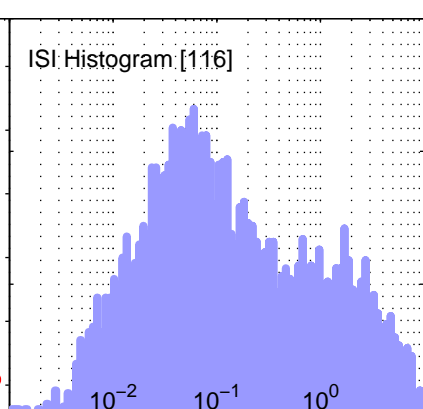

20  
40  
60  
80  
100  
120  
140  
160

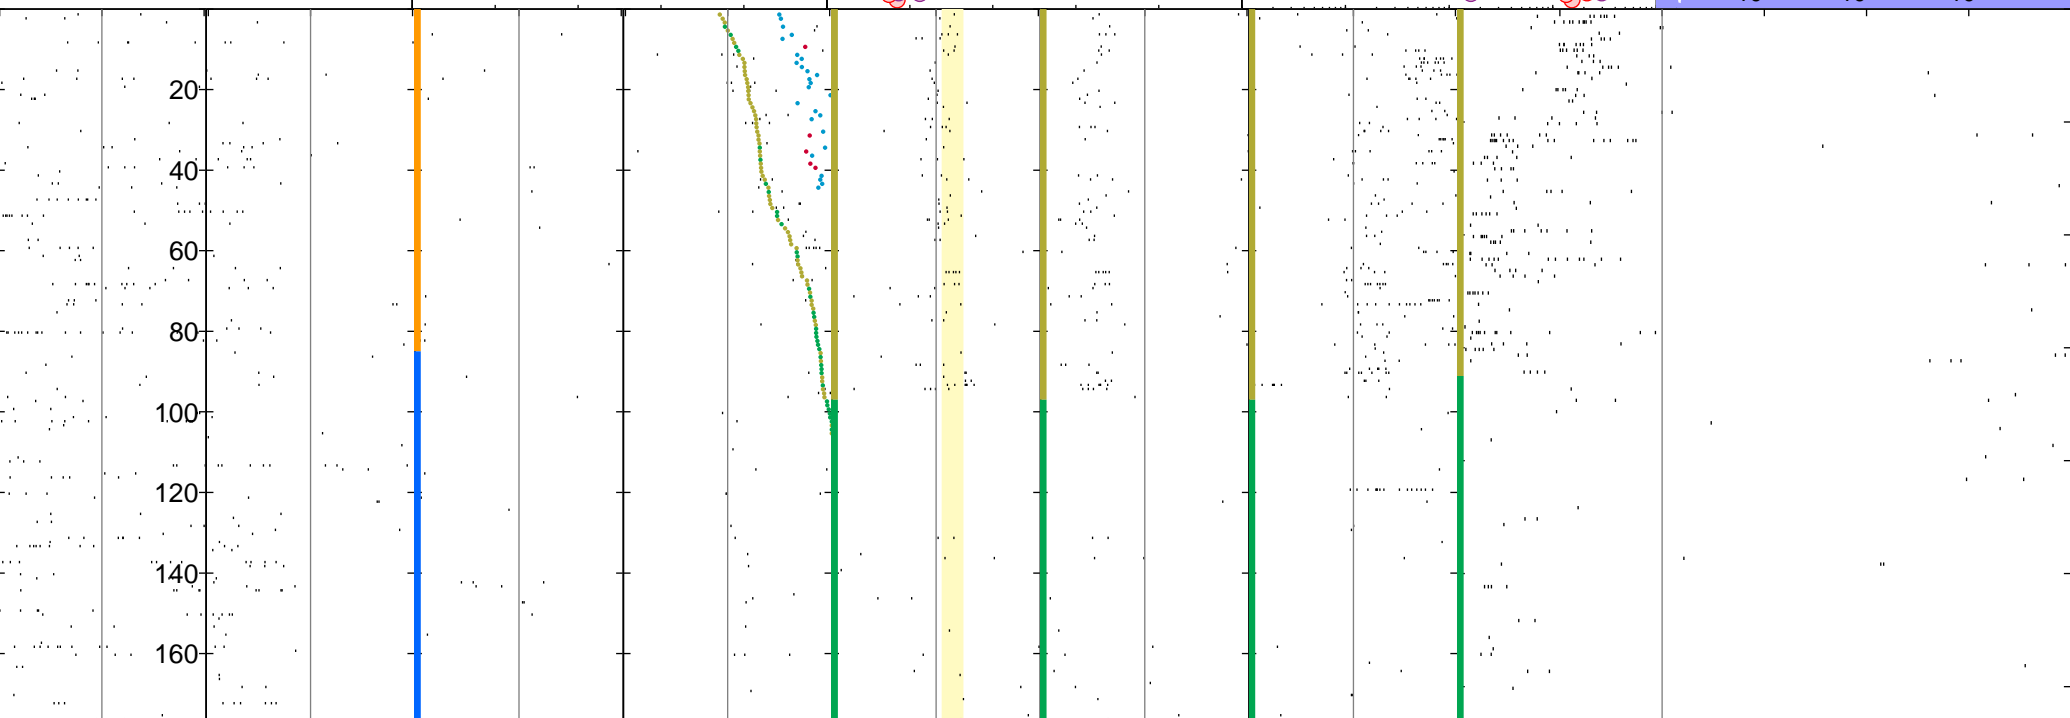

1 Cue On [177] 2 Nose In [177] 3 Tone [84,93] 4 Go [177] 5 Choice [96,81] 6 Side In [96,81] 7 Nose Out [96,81] 8 Reward [64,62]

7  
6  
5  
4  
3  
2

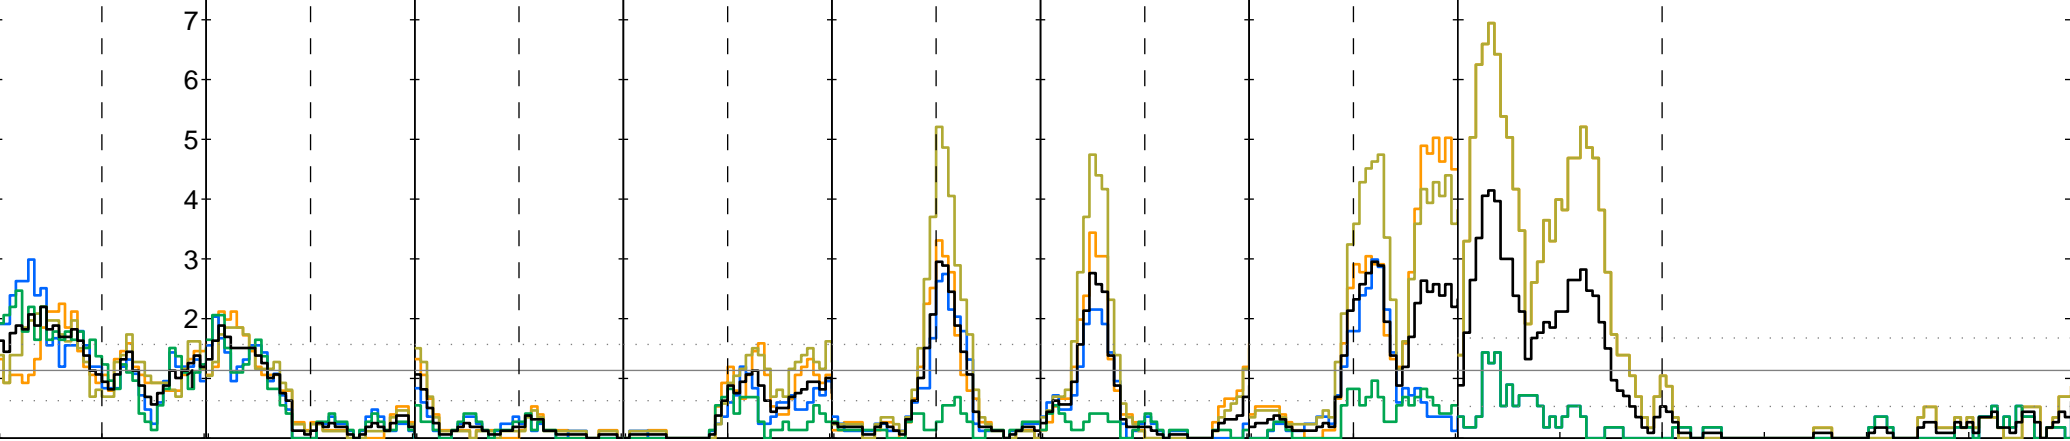

Cell: C0320070630T09h

AP: 1.6 ML: 3.7 DV: 6.2

w: 2 n: 5141  $P_{ISI>2}$ : 0.14

1/2pw: 245 $\mu$ s p $\rightarrow$ v: 887 $\mu$ s

$\beta_T$ : -0.35  $\beta_D$ : -0.49

$\beta_P$ : 1 SI: NaN

Session FR: 1.69 Hz

Pk Ev: 8 - Reward (T2/Ipsi)

Pk FR: 5.08Hz (-0.76s) MSN

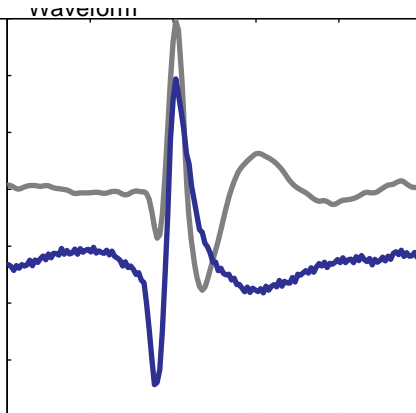

HP/PV

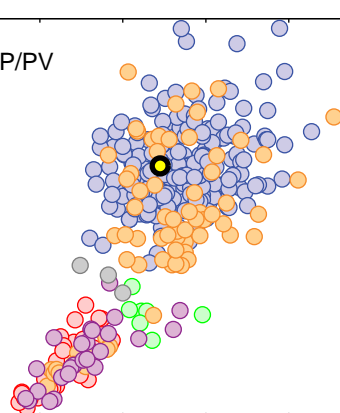

FR/PV

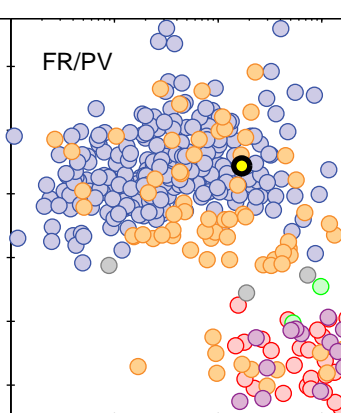

ISI Histogram [195]

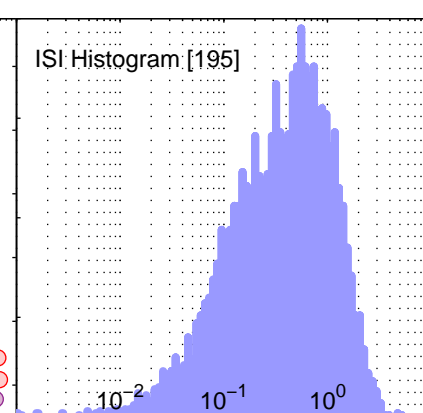

10

20

30

40

50

60

70

80

1 Cue On [82]

2 Nose In [82]

3 Tone [38,44]

4 Go [82]

5 Choice [35,47]

6 Side In [35,47]

7 Nose Out [35,47]

8 Reward [26,35]

5

4

3

2

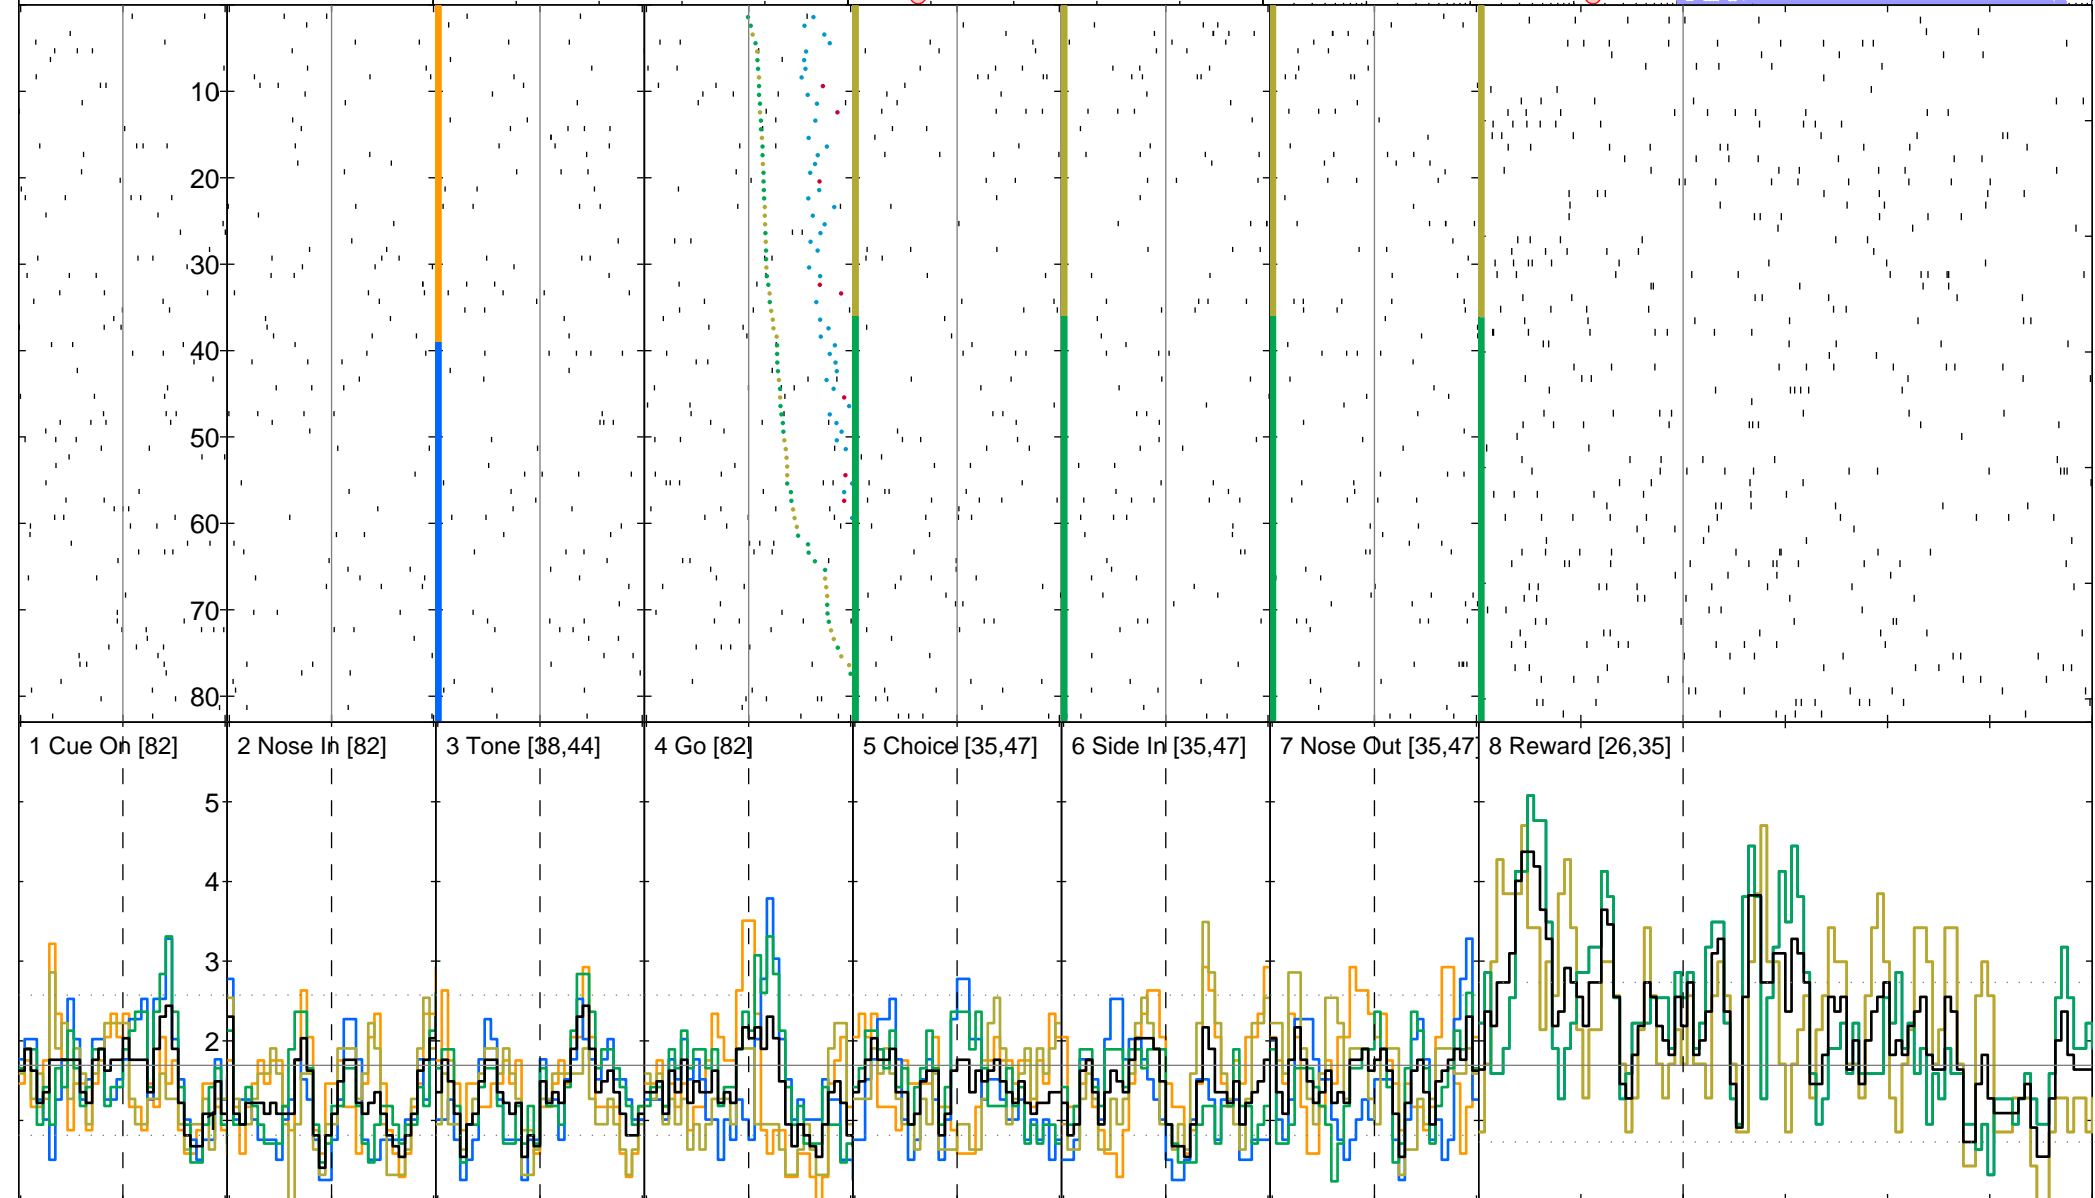

**Cell: C0320070625T07c**

AP: 0.96 ML: 3.6 DV: 6.6

w: 3 n: 18055  $P_{ISI>2}$ : 0.1

1/2pw: 248 $\mu$ s p $\rightarrow$ v: 682 $\mu$ s

$\beta_T$ : -3.6  $\beta_D$ : 3.1

$\beta_P$ : 3 SI: 0.57

Session FR: 5.16 Hz

Pk Ev: 8 - Reward (T2/Ipsi)

Pk FR: 38.7Hz (-0.67s) **MSN**

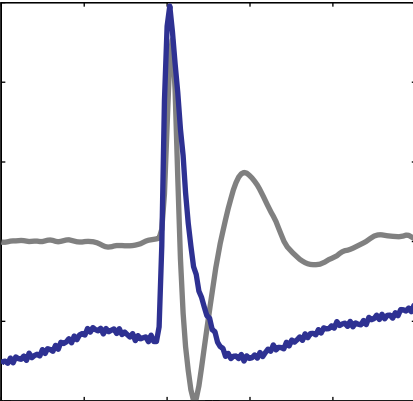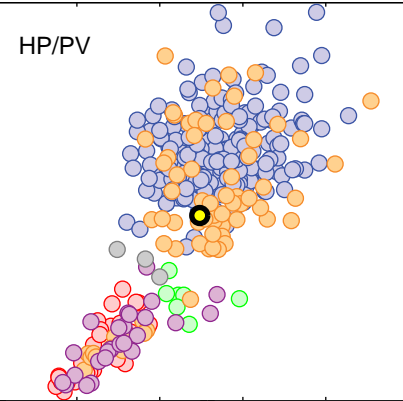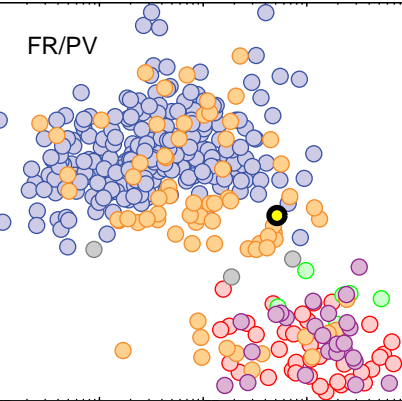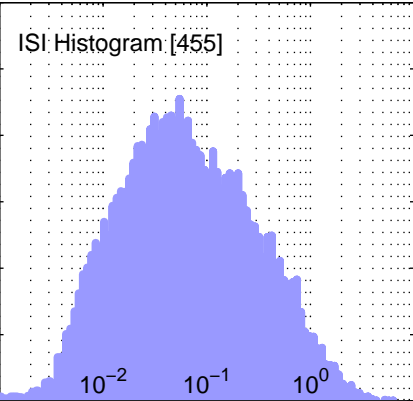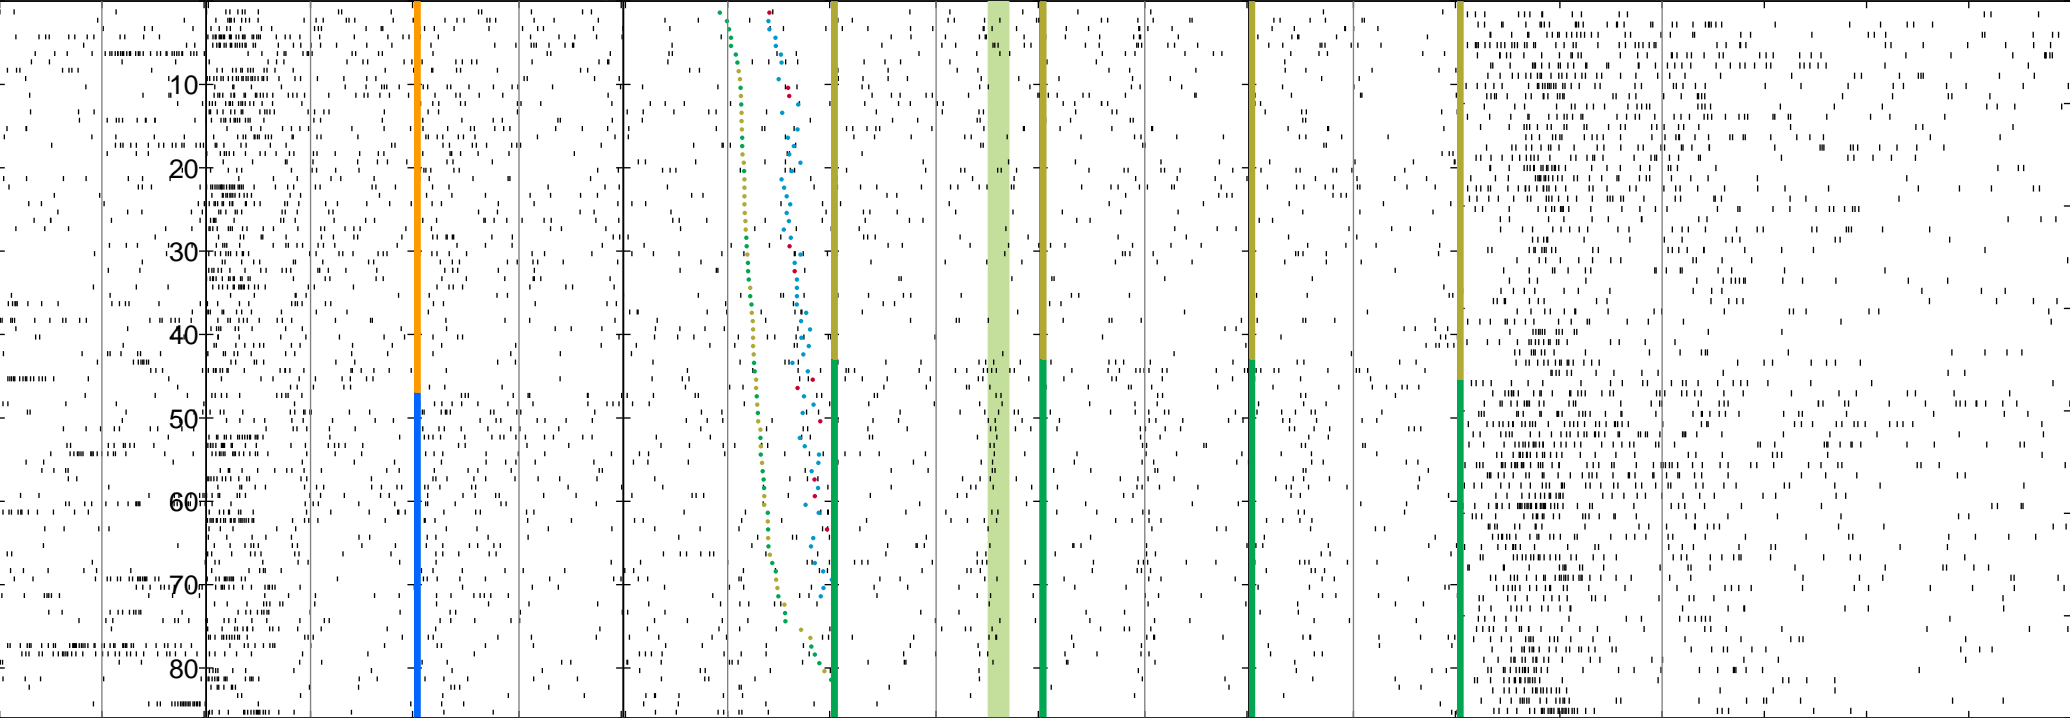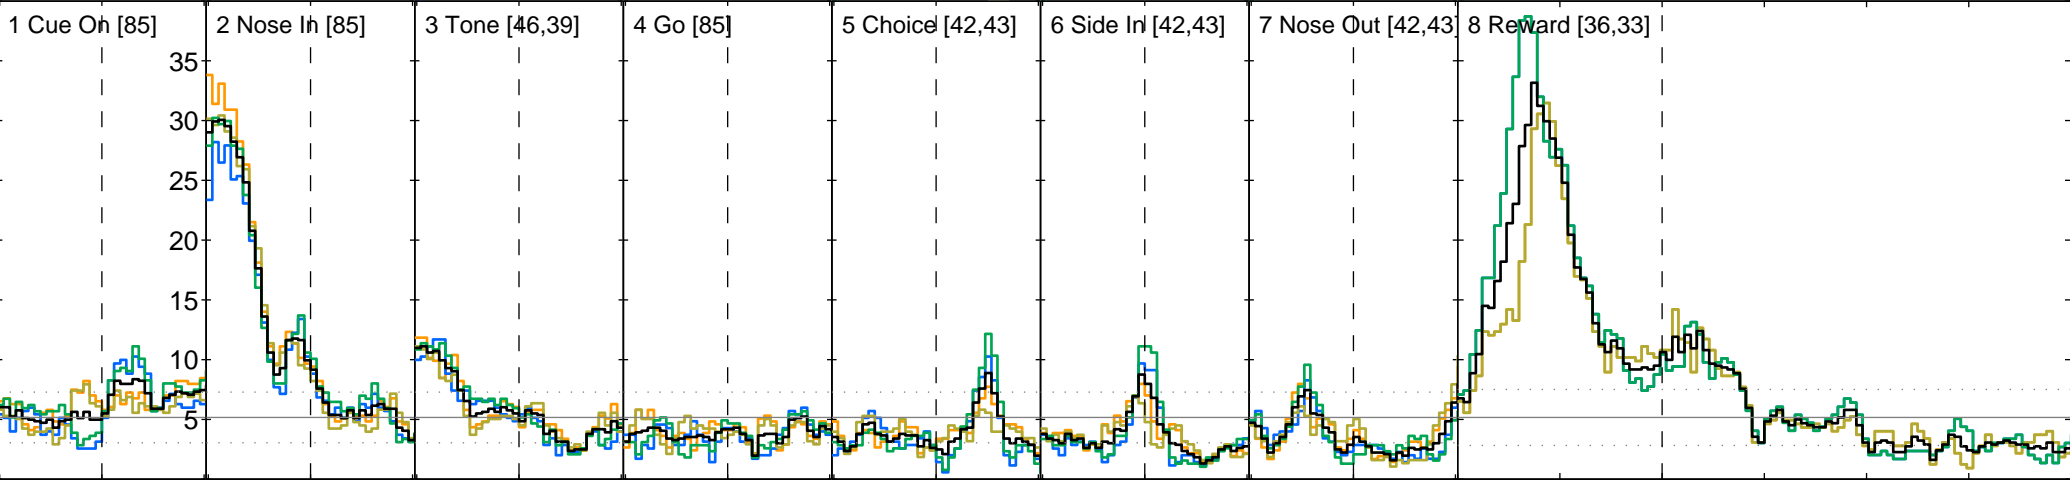

Cell: C1220071022T11f

AP: -2.8 ML: 4.2 DV: 6.6

w: 2 n: 7209  $P_{ISI>2}$ : 0.72

1/2pw: 338 $\mu$ s p->v: 864 $\mu$ s

$\beta_T$ : -2  $\beta_D$ : 4.5

$\beta_P$ : 3.5 SI: 0.72

Session FR: 1.22 Hz

Pk Ev: 8 - Reward (T2/Ipsi)

Pk FR: 24Hz (-0.58s) MSN

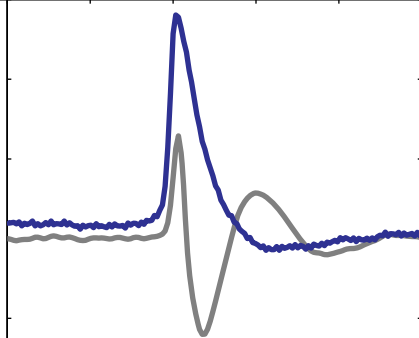

HP/PV

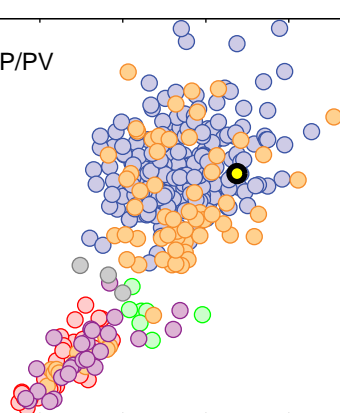

FR/PV

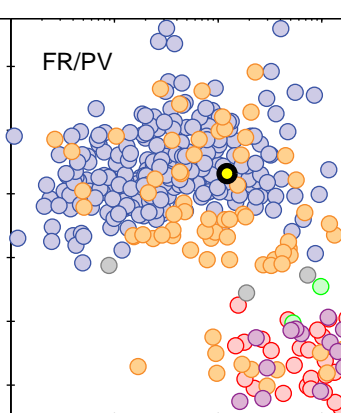

ISI Histogram [200]

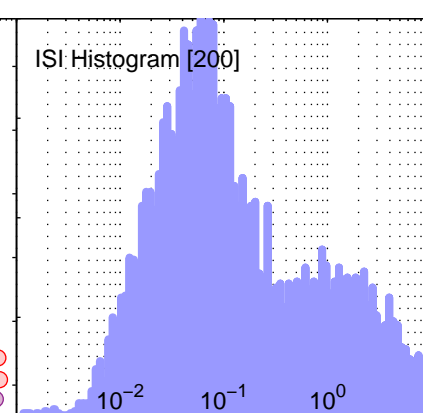

10  
20  
30  
40  
50  
60  
70  
80

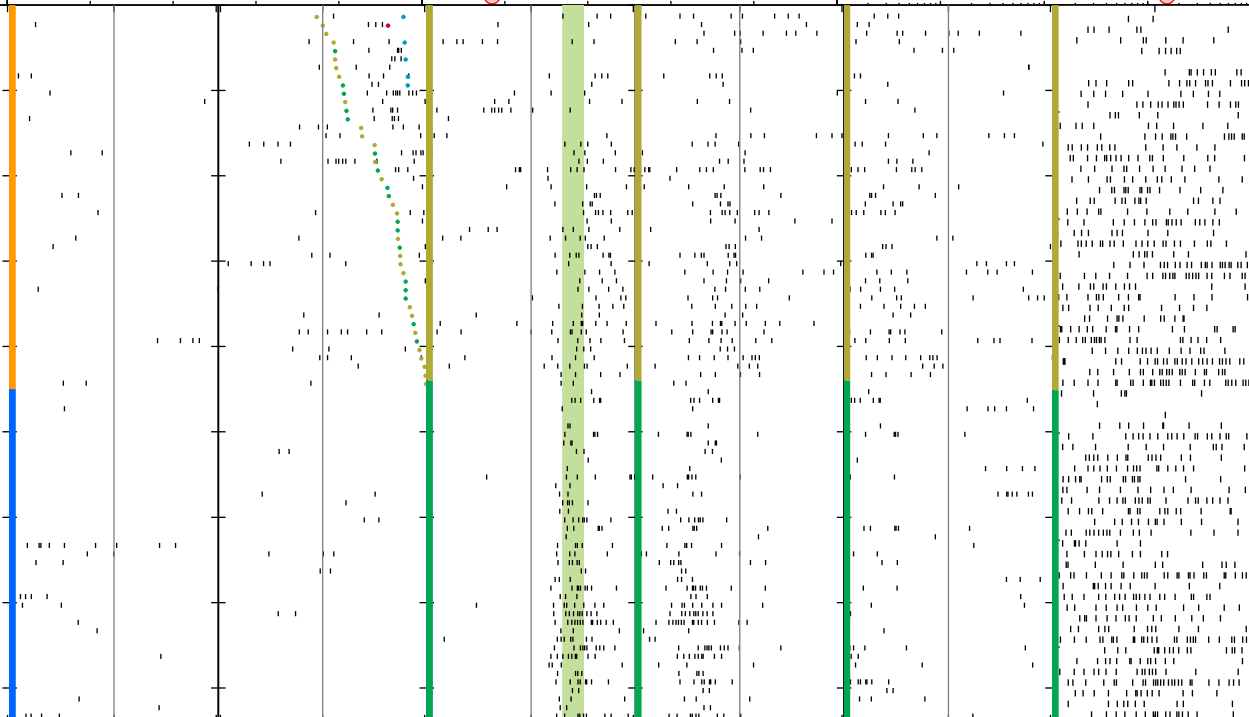

1 Cue On [83]

2 Nose In [83]

3 Tone [44,39]

4 Go [83]

5 Choice [43,40]

6 Side In [43,40]

7 Nose Out [43,40]

8 Reward [35,31]

25  
20  
15  
10  
5

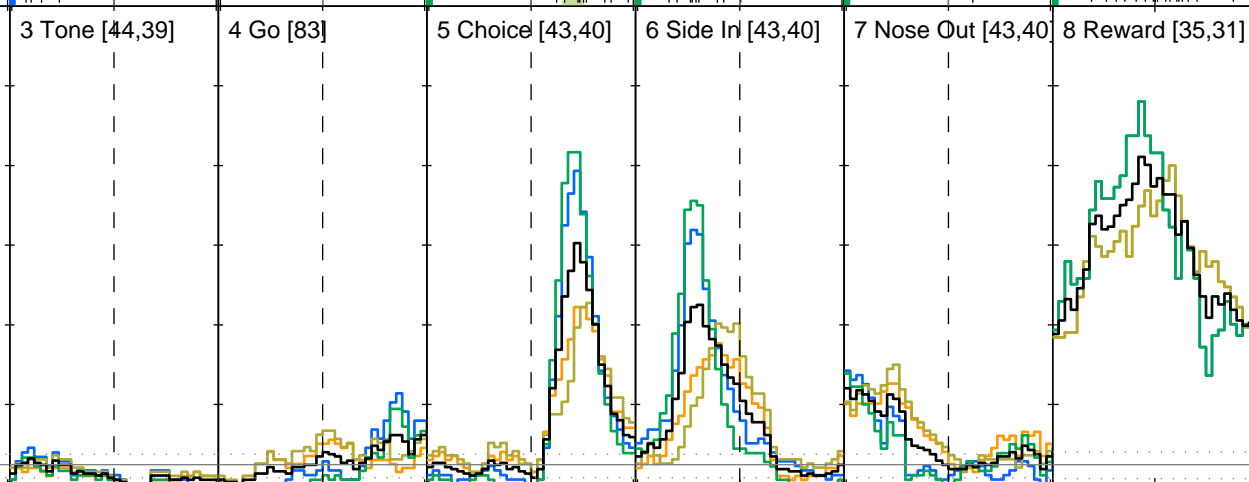

Cell: C0320070627T11a

AP: -0.96 ML: 3.7 DV: 6.6

w: 2 n: 13651  $P_{ISI>2}$ : 0.0036

1/2pw: 264 $\mu$ s p $\rightarrow$ v: 1118 $\mu$ s

$\beta_T$ : -3.4  $\beta_D$ : 2.9

$\beta_P$ : -3.3 SI: 0.49

Session FR: 5.57 Hz

Pk Ev: 8 - Reward (T1/Con)

Pk FR: 15.1Hz (-0.49s) **MSN**

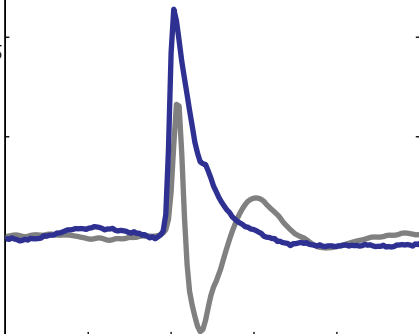

HP/PV

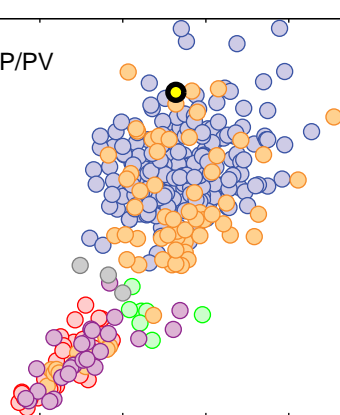

FR/PV

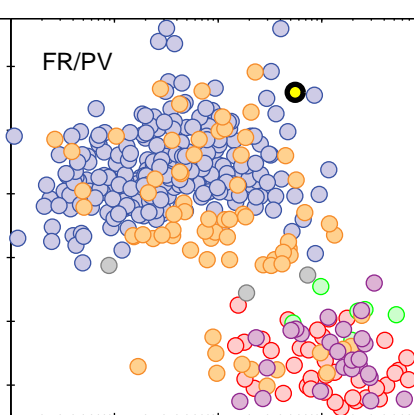

ISI Histogram [583]

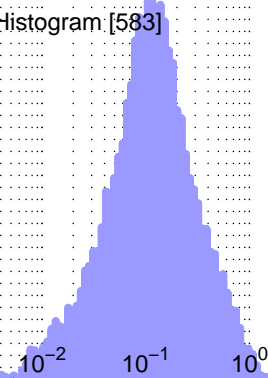

10  
20  
30  
40  
50  
60  
70  
80

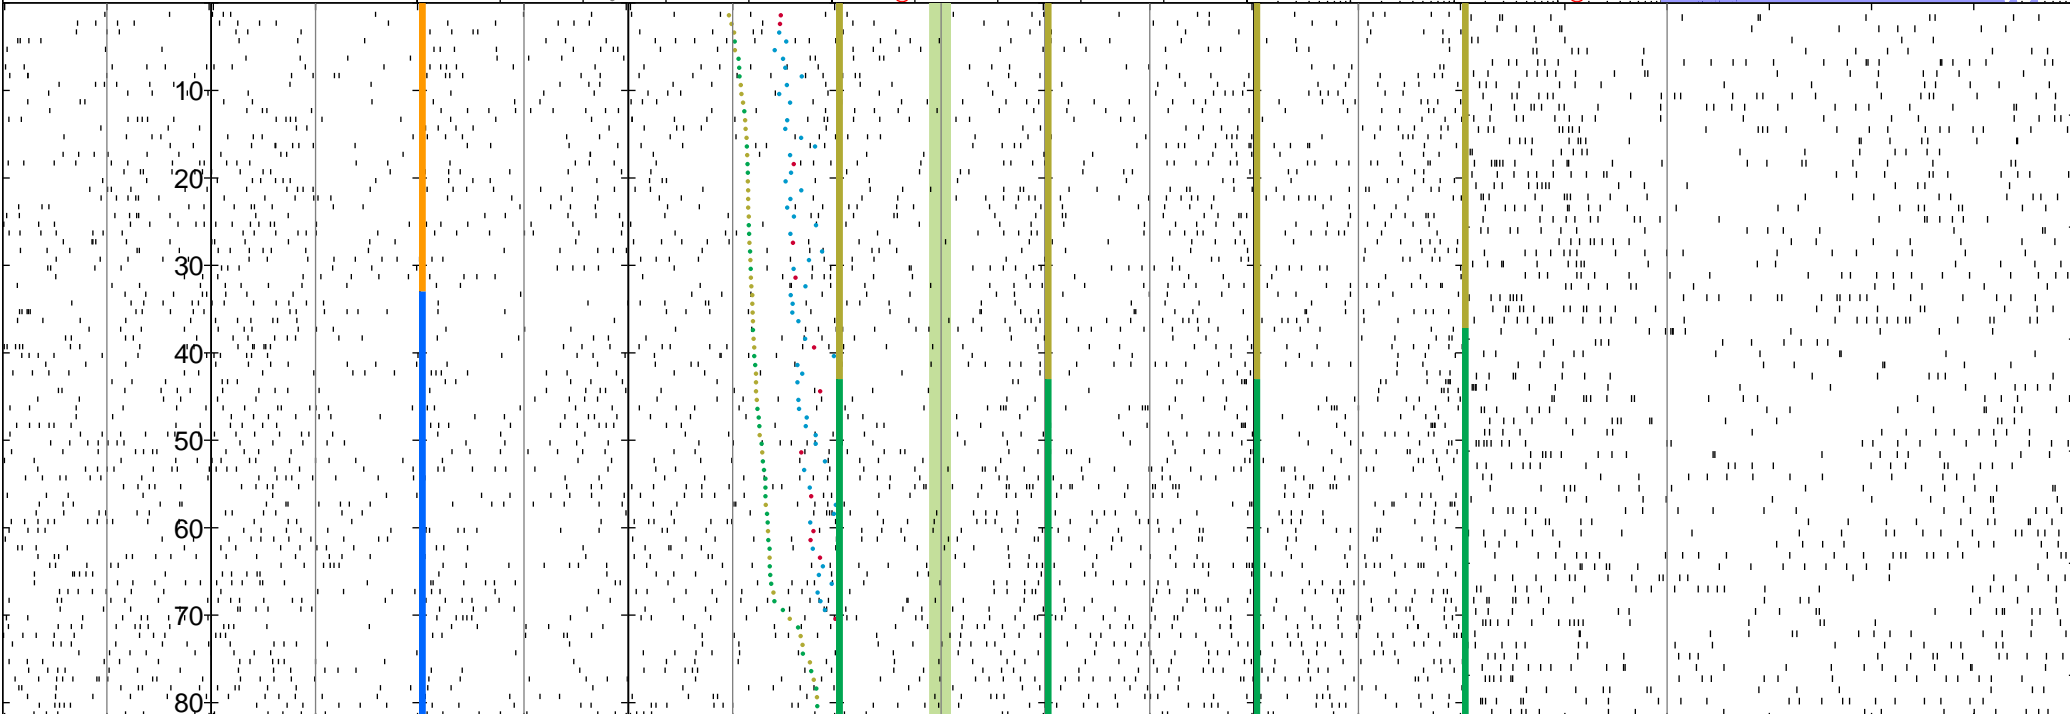

1 Cue On [81]

2 Nose In [81]

3 Tone [32,49]

4 Go [81]

5 Choice [42,39]

6 Side In [42,39]

7 Nose Out [42,39]

8 Reward [28,35]

15  
10

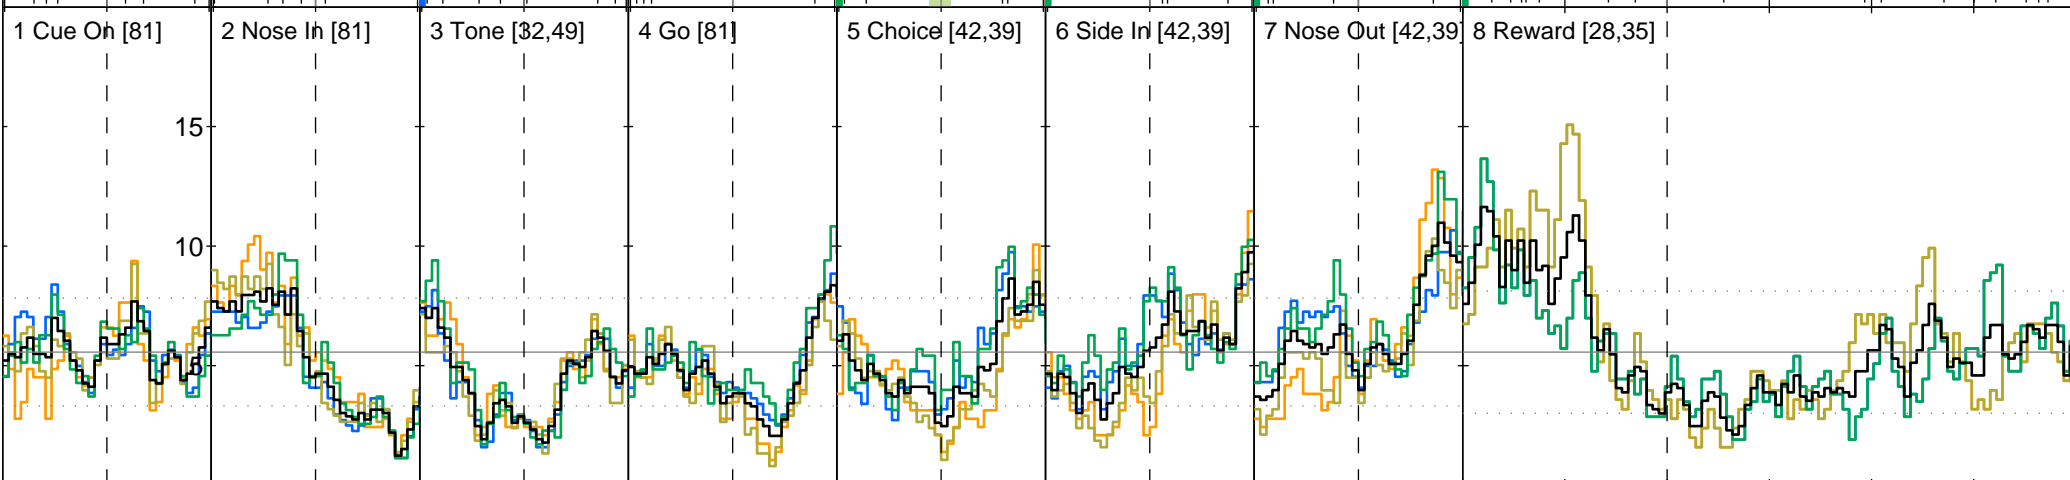

**Cell: C0320070619T09g**

AP: 1.6 ML: 3.7 DV: 5  
w: 3 n: 3549  $P_{ISI>2}$ : 0.74  
1/2pw: 341 $\mu$ s p->v: 819 $\mu$ s  
 $\beta_T$ : 2.7  $\beta_D$ : -2.6  
 $\beta_P$ : -2.1 SI: NaN  
Session FR: 0.837 Hz  
Pk Ev: 8 - Reward (T1/Con)  
Pk FR: 8.82Hz (-0.4s) **MSN**

Waveform

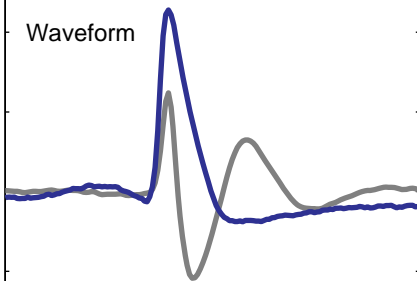

HP/PV

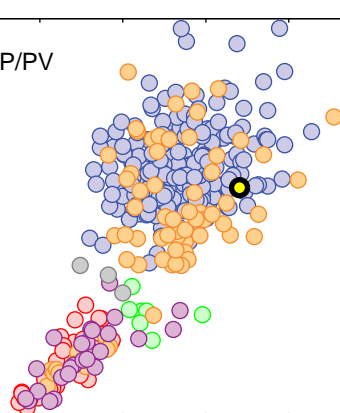

FR/PV

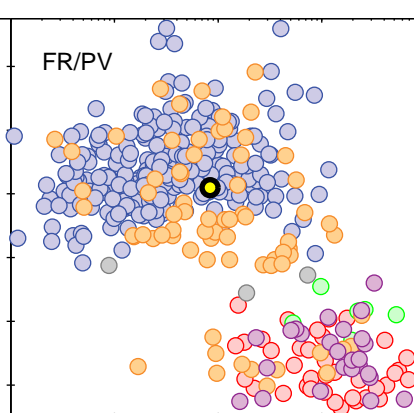

ISI Histogram [69]

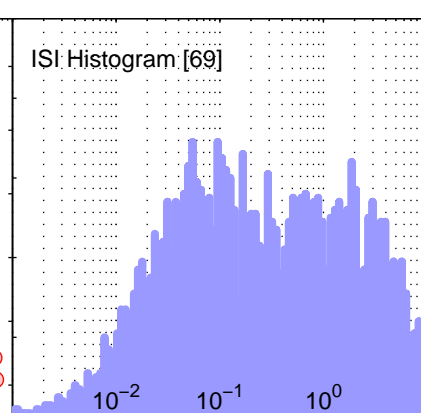10  
20  
30  
40  
50  
60  
70  
80  
90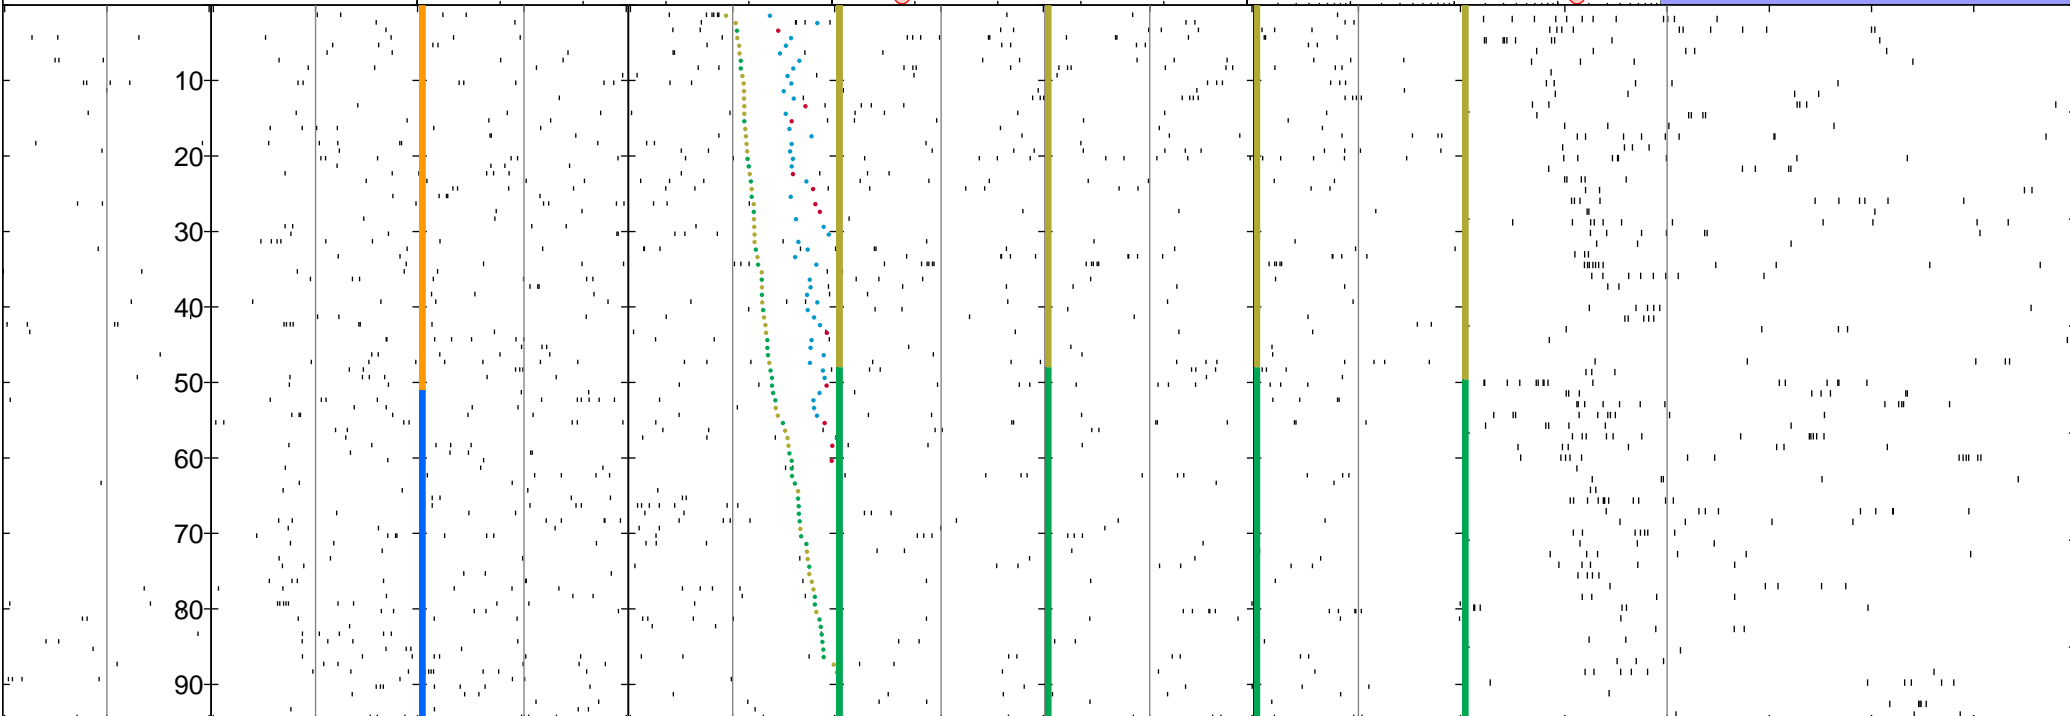

1 Cue On [94]

2 Nose In [94]

3 Tone [50,44]

4 Go [94]

5 Choice [47,47]

6 Side In [47,47]

7 Nose Out [47,47]

8 Reward [34,32]

8  
6  
4  
2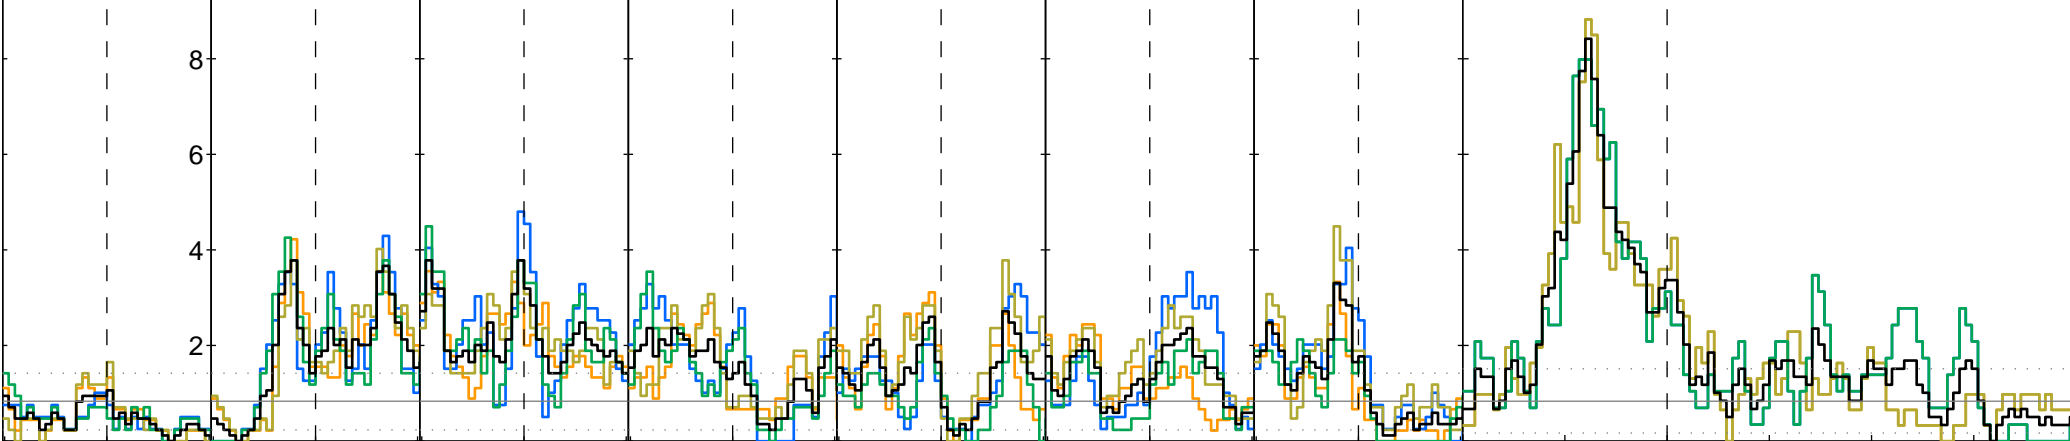



**Cell: C0320070619T07e**

AP: 0.96 ML: 3.6 DV: 5.8  
w: 4 n: 2111  $P_{ISI>2}$ : 0.89  
1/2pw: 269 $\mu$ s p->v: 1008 $\mu$ s  
 $\beta_T$ : NaN  $\beta_D$ : NaN  
 $\beta_P$ : NaN SI: NaN  
Session FR: 0.497 Hz  
Pk Ev: 8 - Reward (T2/Ipsi)  
Pk FR: 6.25Hz (-0.34s) **MSN**

Waveform

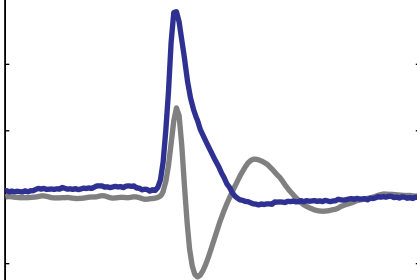

HP/PV

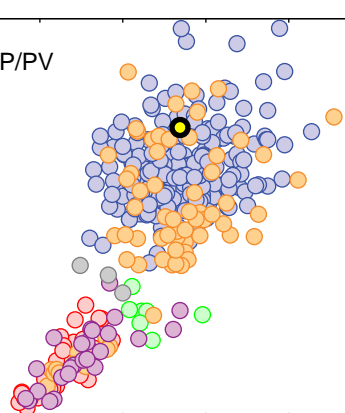

FR/PV

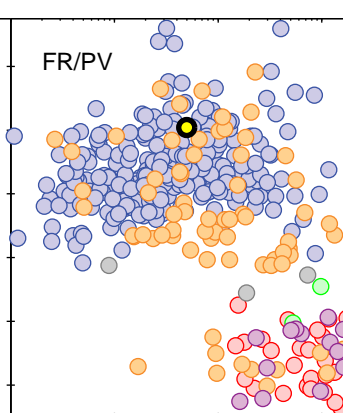

ISI Histogram [43]

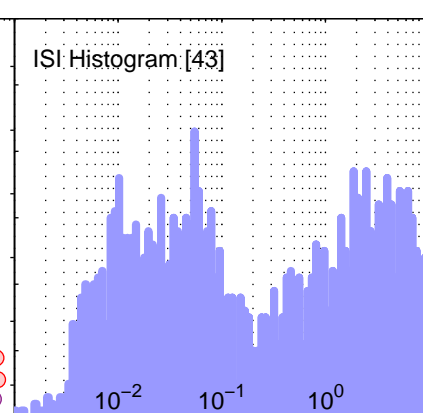

10  
20  
30  
40  
50  
60  
70  
80  
90

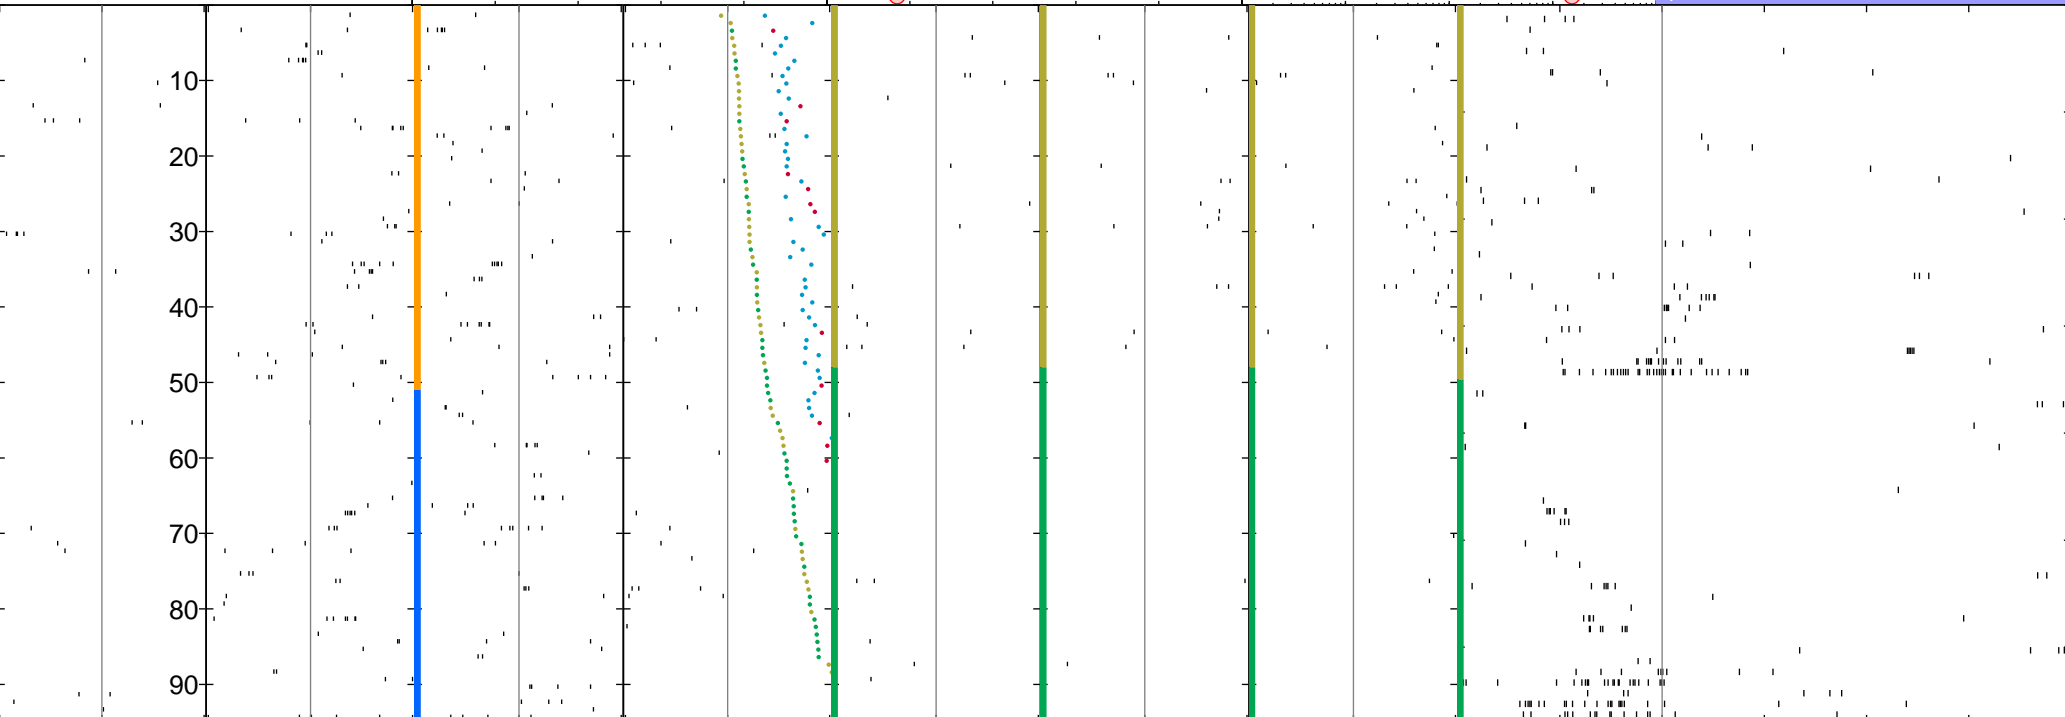

1 Cue On [94] 2 Nose In [94] 3 Tone [50,44] 4 Go [94] 5 Choice [47,47] 6 Side In [47,47] 7 Nose Out [47,47] 8 Reward [34,32]

7  
6  
5  
4  
3  
2  
1

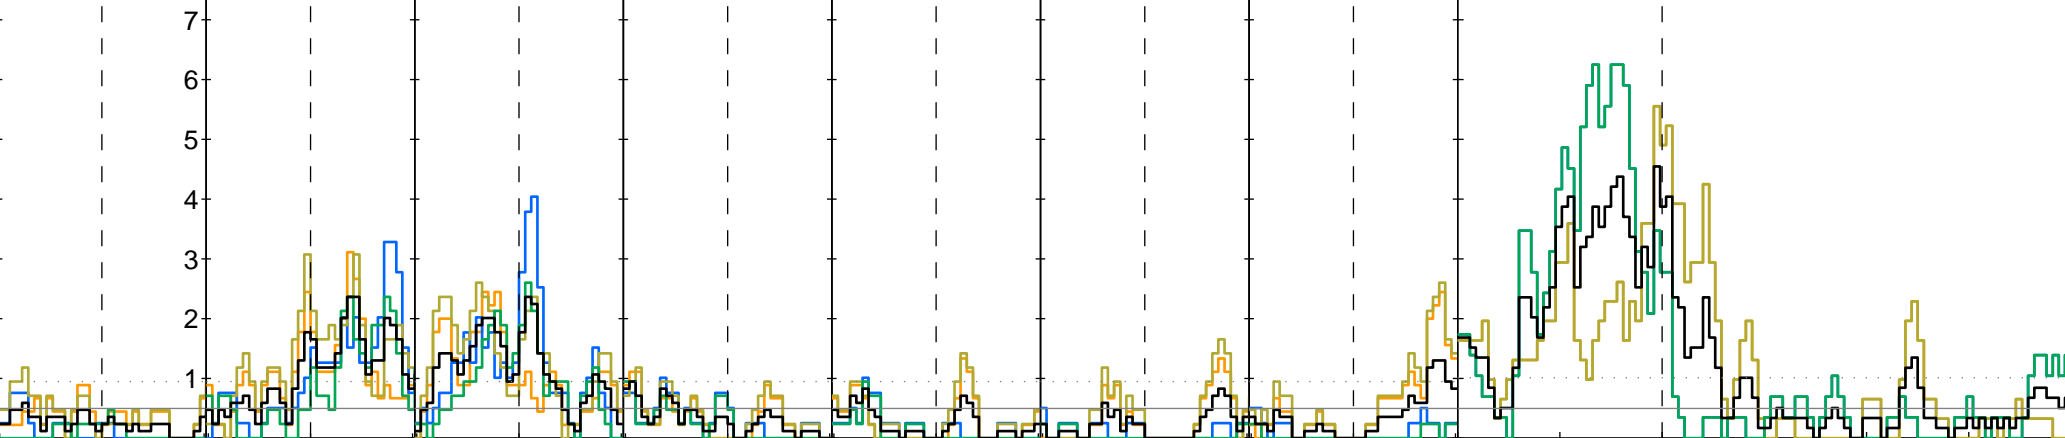

**Cell: C0320070702T11b**

AP: -0.96 ML: 3.7 DV: 7.4

w: 2 n: 12524  $P_{ISI>2}$ : 0.21/2pw: 234 $\mu$ s p->v: 792 $\mu$ s $\beta_T$ : -2.4  $\beta_D$ : -1.9 $\beta_P$ : -2.4 SI: -0.4

Session FR: 3.59 Hz

Pk Ev: 8 - Reward (T2/Ipsi)

Pk FR: 22.6Hz (-0.25s) **MSN**

Waveform

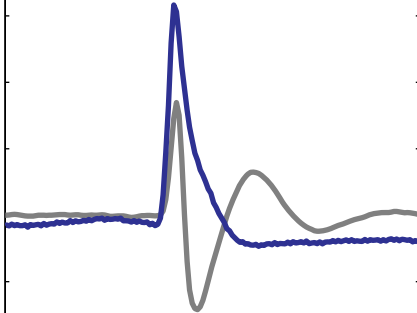

HP/PV

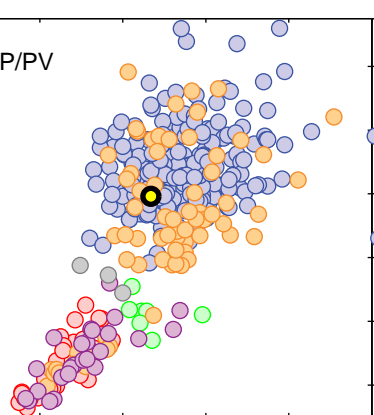

FR/PV

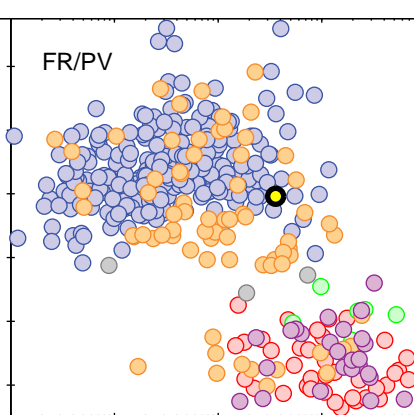

ISI Histogram [408]

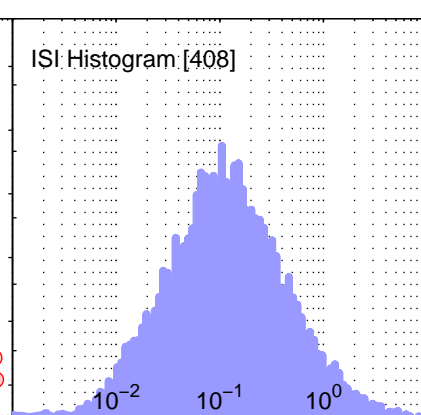

10

20

30

40

50

60

70

80

1 Cue On [87]

2 Nose In [87]

3 Tone [47,40]

4 Go [87]

5 Choice [48,39]

6 Side In [48,39]

7 Nose Out [48,39]

8 Reward [38,30]

25

20

15

10

5

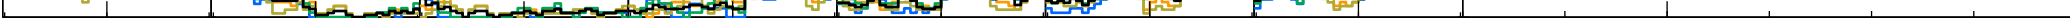

**Cell: C0320070623T09d**

AP: 1.6 ML: 3.7 DV: 5.3  
w: 2 n: 908  $P_{ISI>2}$ : 0.97  
1/2pw: 282 $\mu$ s p->v: 1042 $\mu$ s  
 $\beta_T$ : NaN  $\beta_D$ : NaN  
 $\beta_P$ : NaN SI: NaN  
Session FR: 0.241 Hz  
Pk Ev: 8 - Reward (T1/Con)  
Pk FR: 21.1Hz (-0.19s) **MSN**

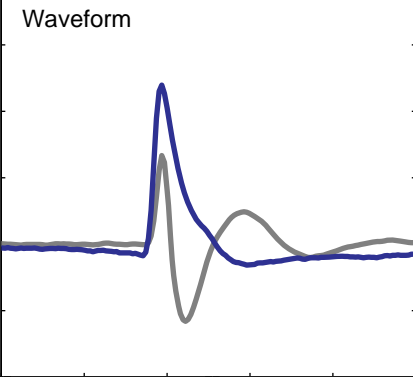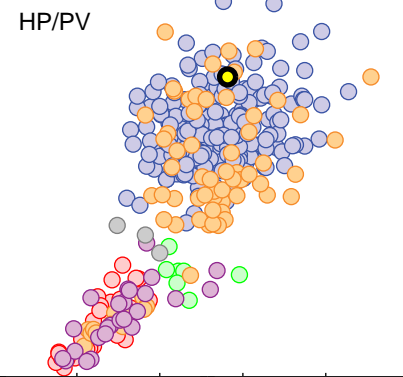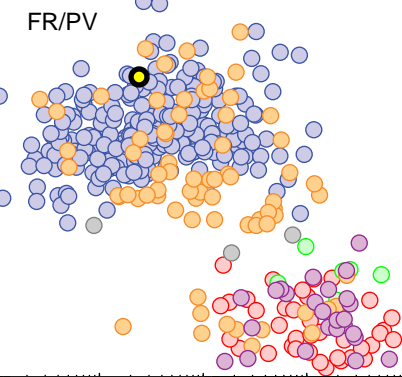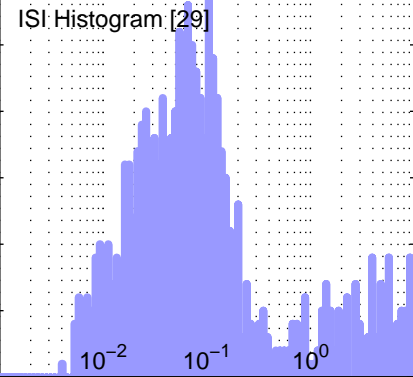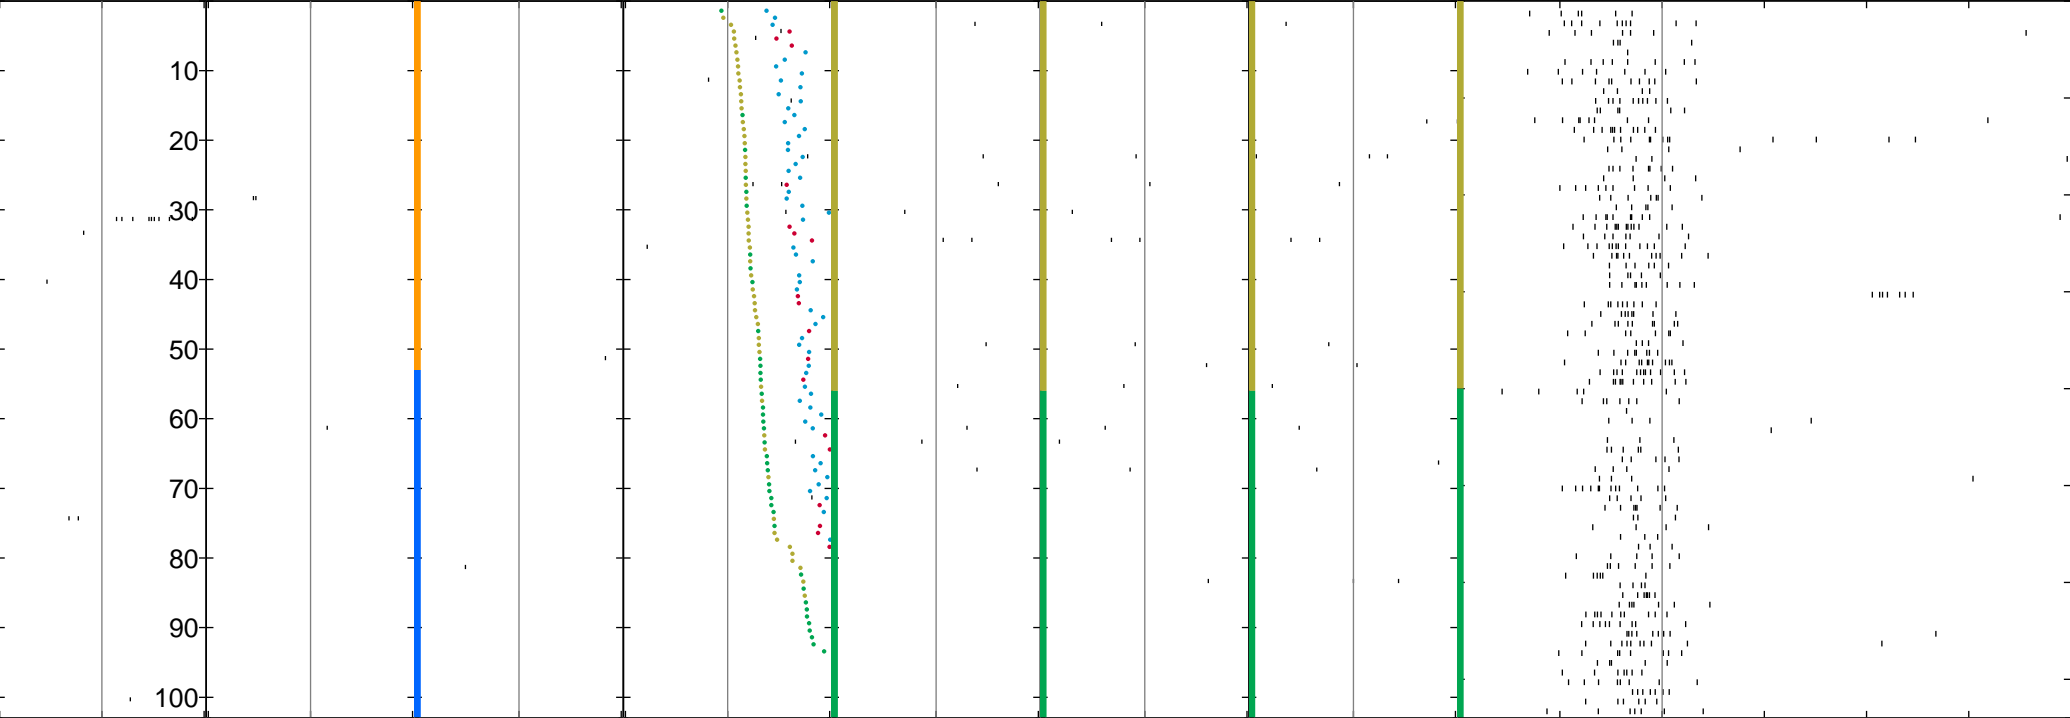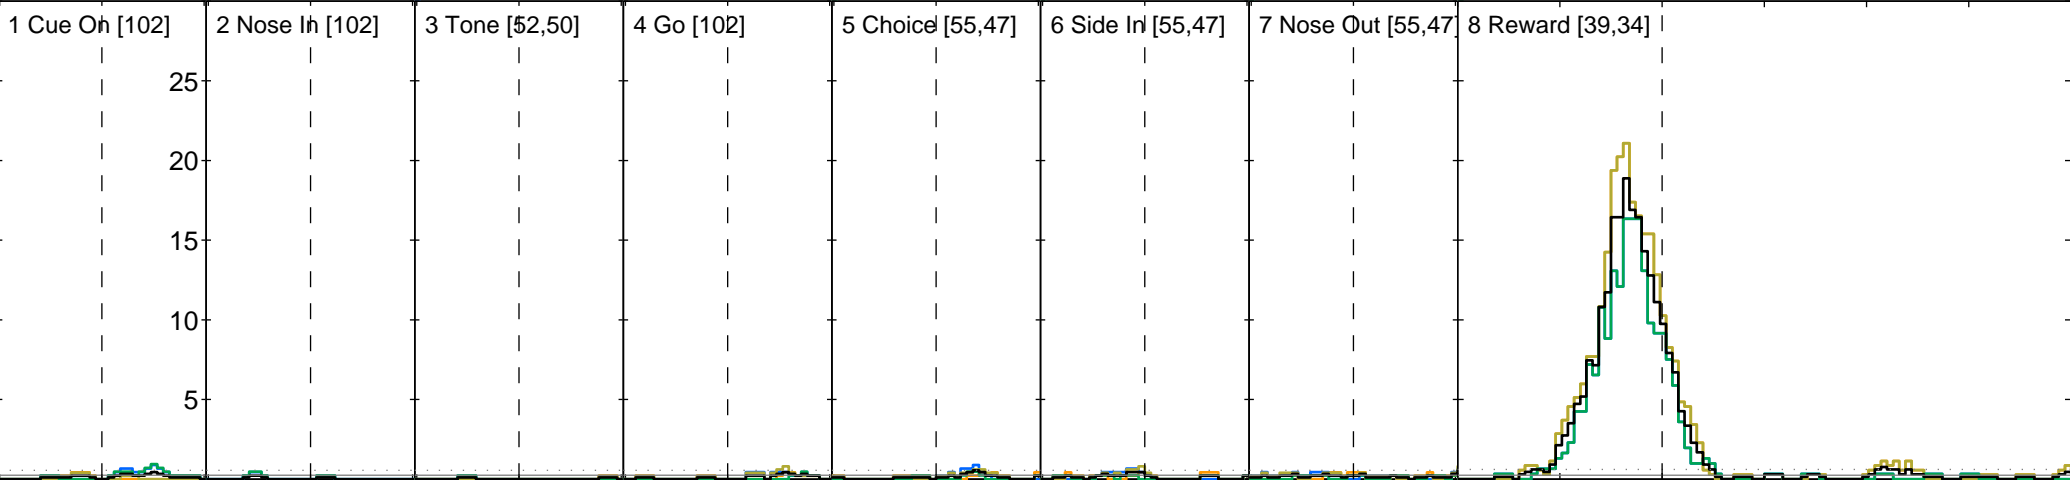

**Cell: C0320070619T09d**

AP: 1.6 ML: 3.7 DV: 5  
w: 2 n: 885  $P_{ISI>2}$ : 0.98  
1/2pw: 254 $\mu$ s p->v: 907 $\mu$ s  
 $\beta_T$ : NaN  $\beta_D$ : NaN  
 $\beta_P$ : NaN SI: NaN  
Session FR: 0.21 Hz  
Pk Ev: 8 - Reward (T1/Con)  
Pk FR: 9.15Hz (-0.1s) **MSN**

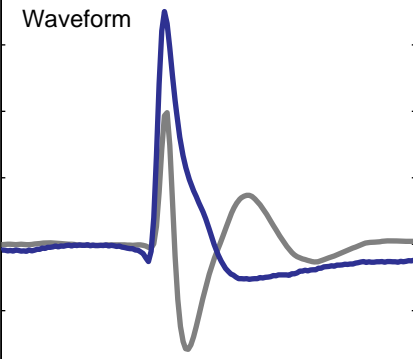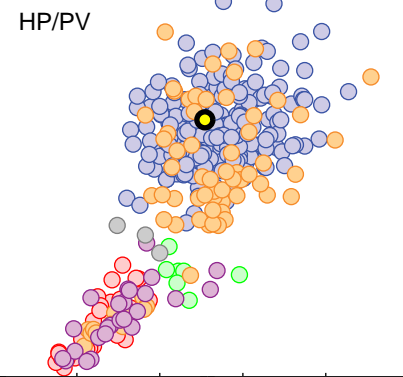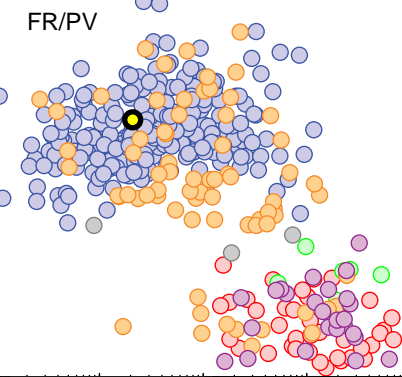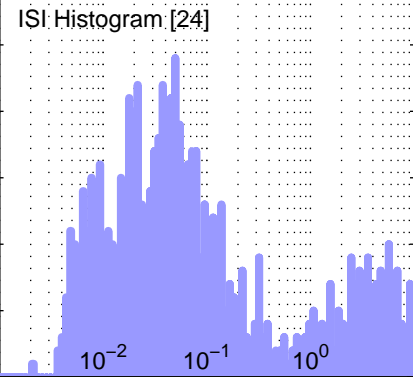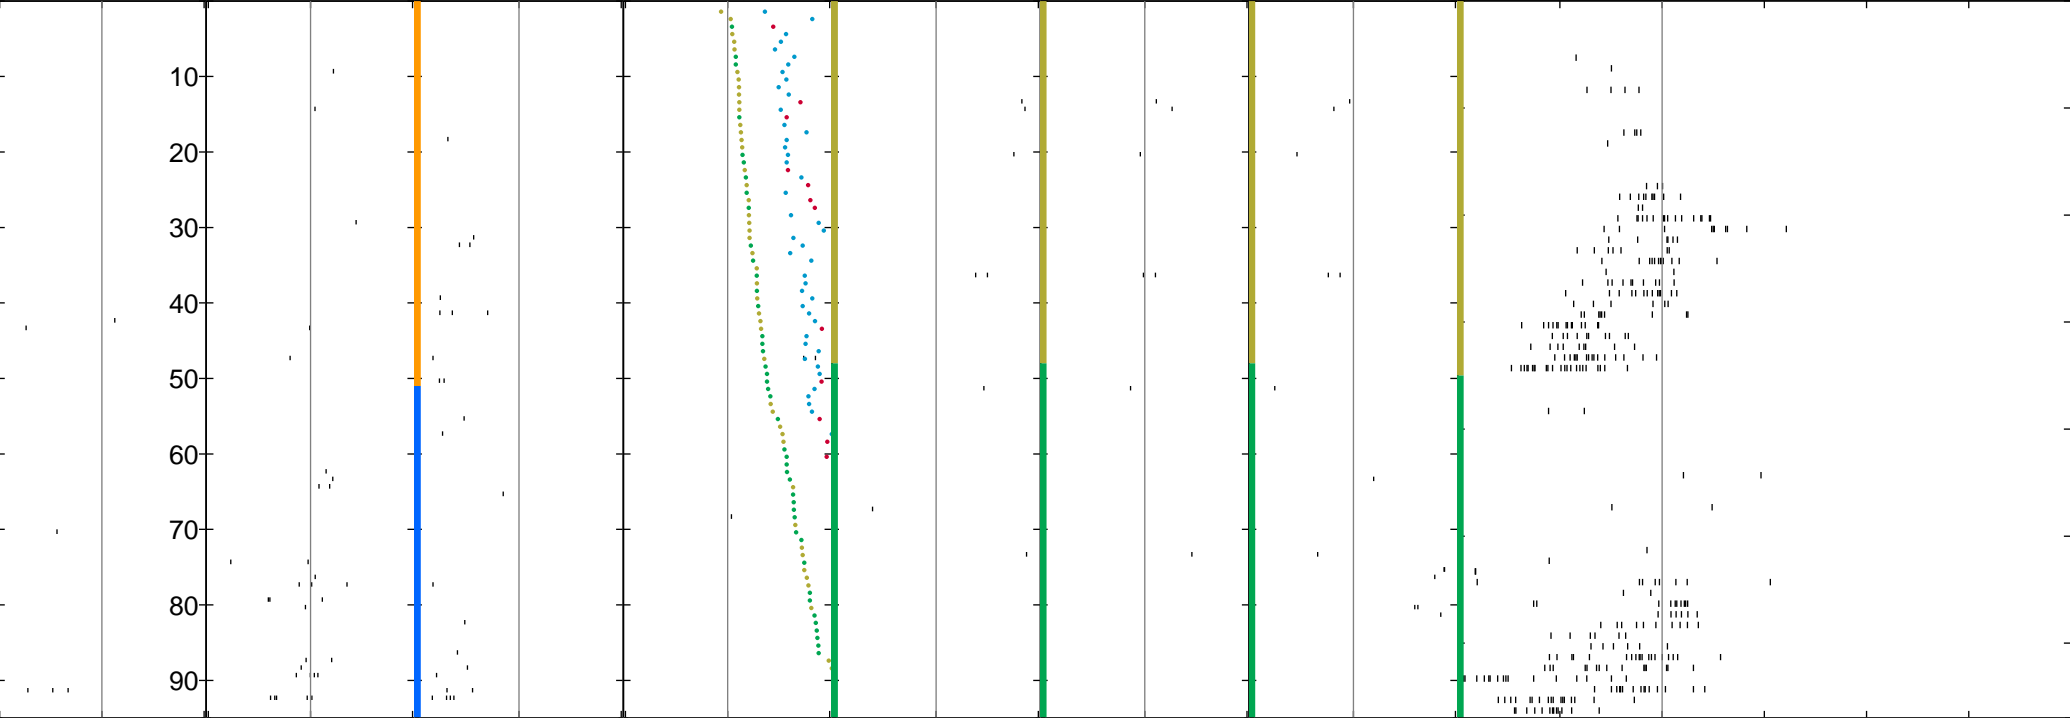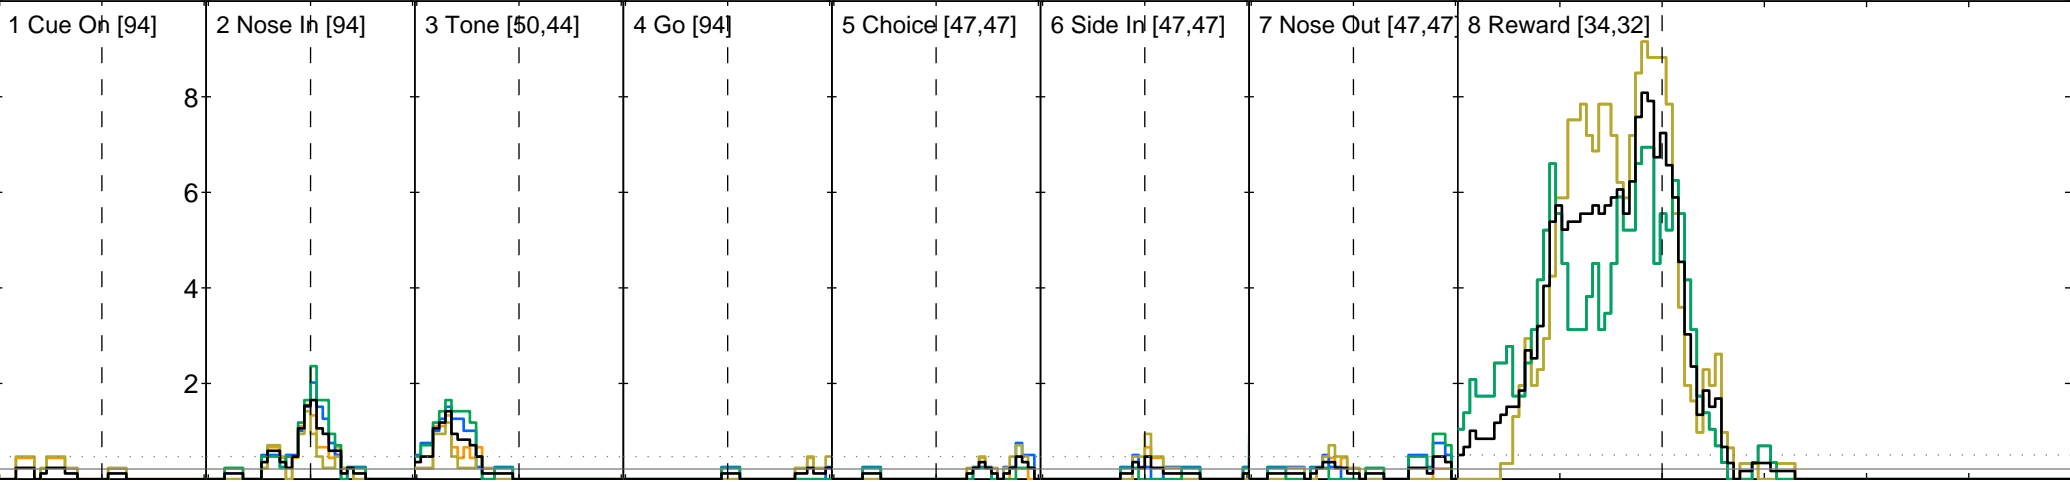

**Cell: C1220071022T11b**

AP: -2.8 ML: 4.2 DV: 6.6

w: 2 n: 1959  $P_{ISI>2}$ : 0.93

1/2pw: 370 $\mu$ s p->v: 1152 $\mu$ s

$\beta_T$ : NaN  $\beta_D$ : NaN

$\beta_P$ : NaN SI: NaN

Session FR: 0.332 Hz

Pk Ev: 8 - Reward (T1/Con)

Pk FR: 10.5Hz (-0.1s) **MSN**

Waveform

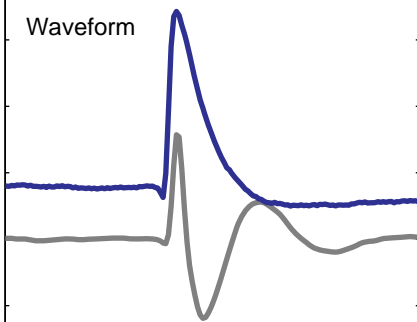

HP/PV

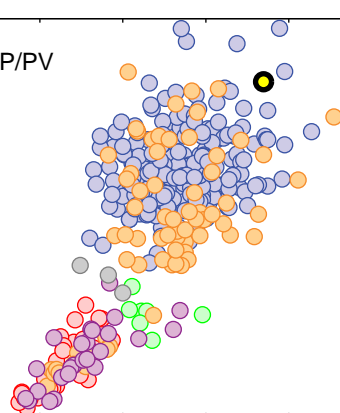

FR/PV

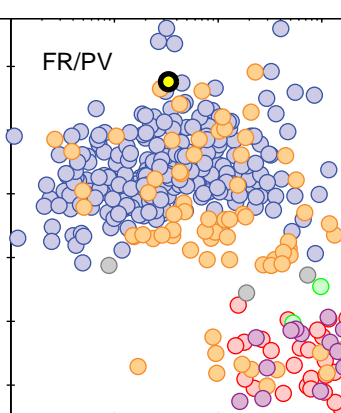

ISI Histogram [44]

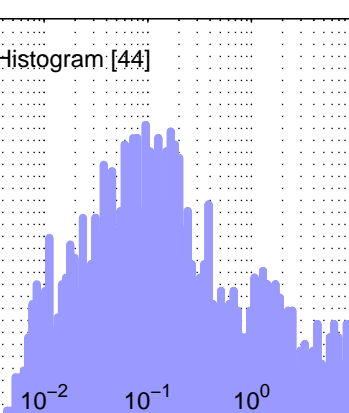

10

20

30

40

50

60

70

80

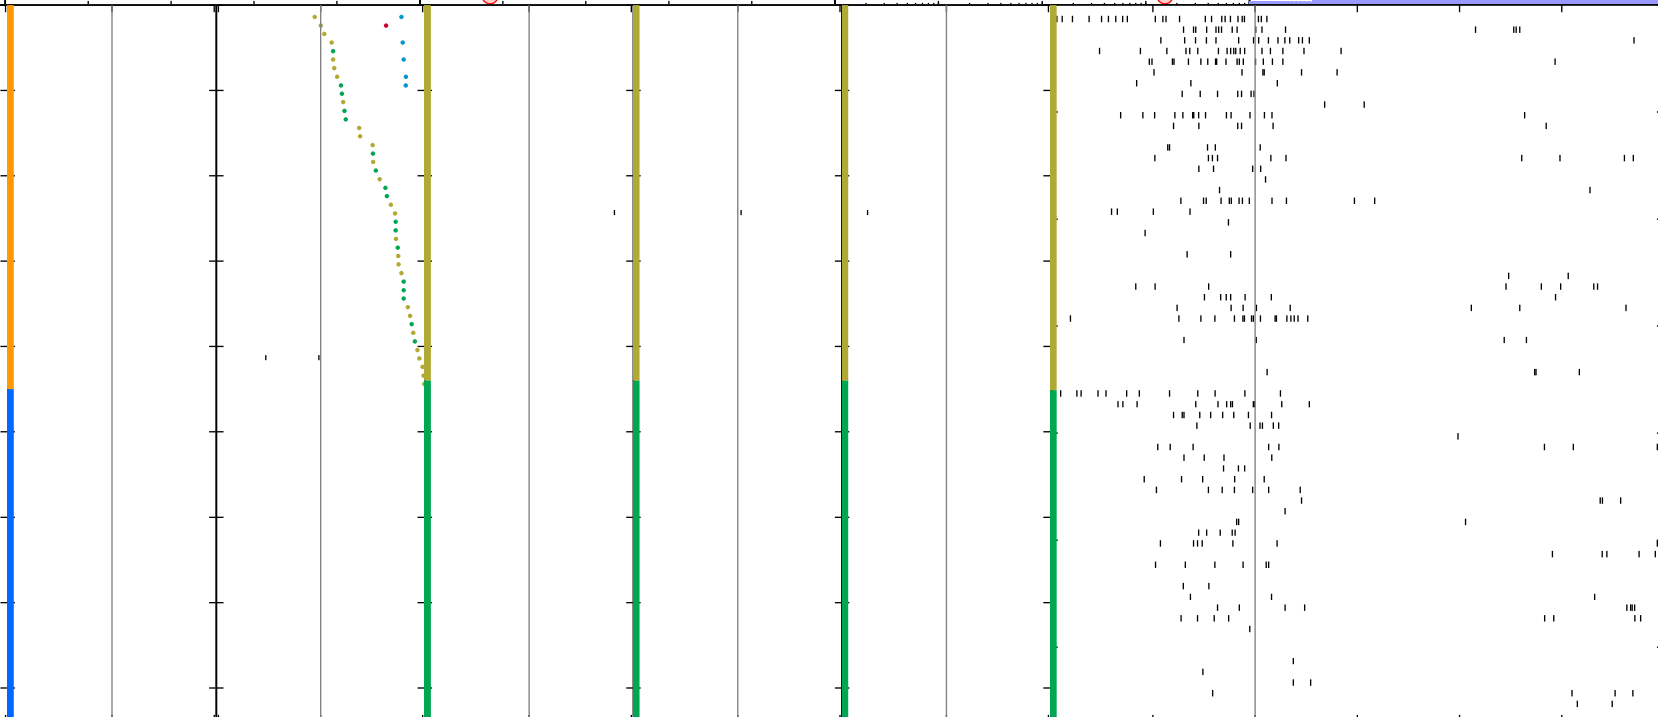

10

5

1 Cue On [83]

2 Nose In [83]

3 Tone [44,39]

4 Go [83]

5 Choice [43,40]

6 Side In [43,40]

7 Nose Out [43,40]

8 Reward [35,31]

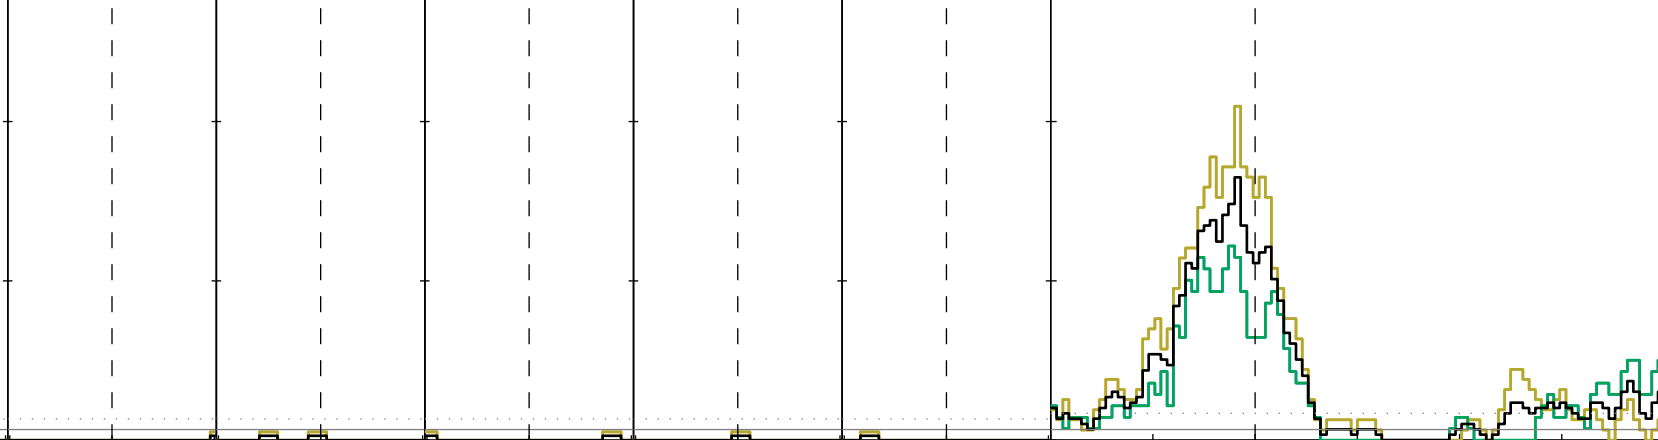

**Cell: C0320070611T09c**

AP: 1.6 ML: 3.7 DV: 4.7

w: 2 n: 17204  $P_{ISI>2}$ : 0.33

1/2pw: 290 $\mu$ s p->v: 896 $\mu$ s

$\beta_T$ : 2  $\beta_D$ : 0.41

$\beta_P$ : -2.4 SI: NaN

Session FR: 2.3 Hz

Pk Ev: 8 - Reward (T1/Con)

Pk FR: 38Hz (-0.01s) **MSN**

Waveform

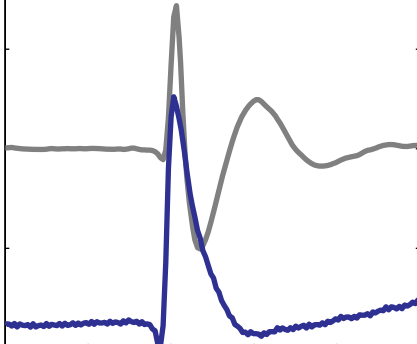

HP/PV

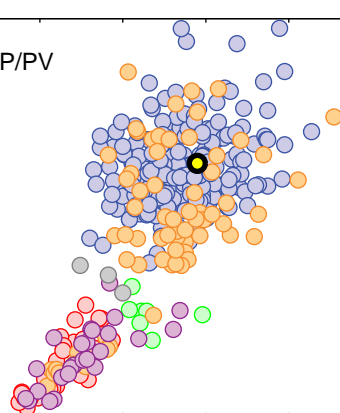

FR/PV

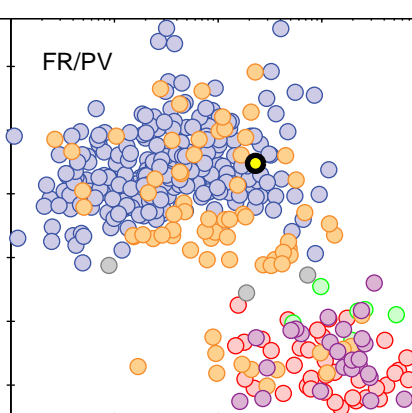

ISI Histogram [517]

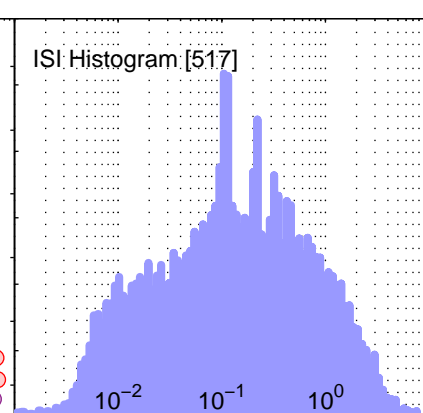

10  
20  
30  
40  
50  
60  
70  
80

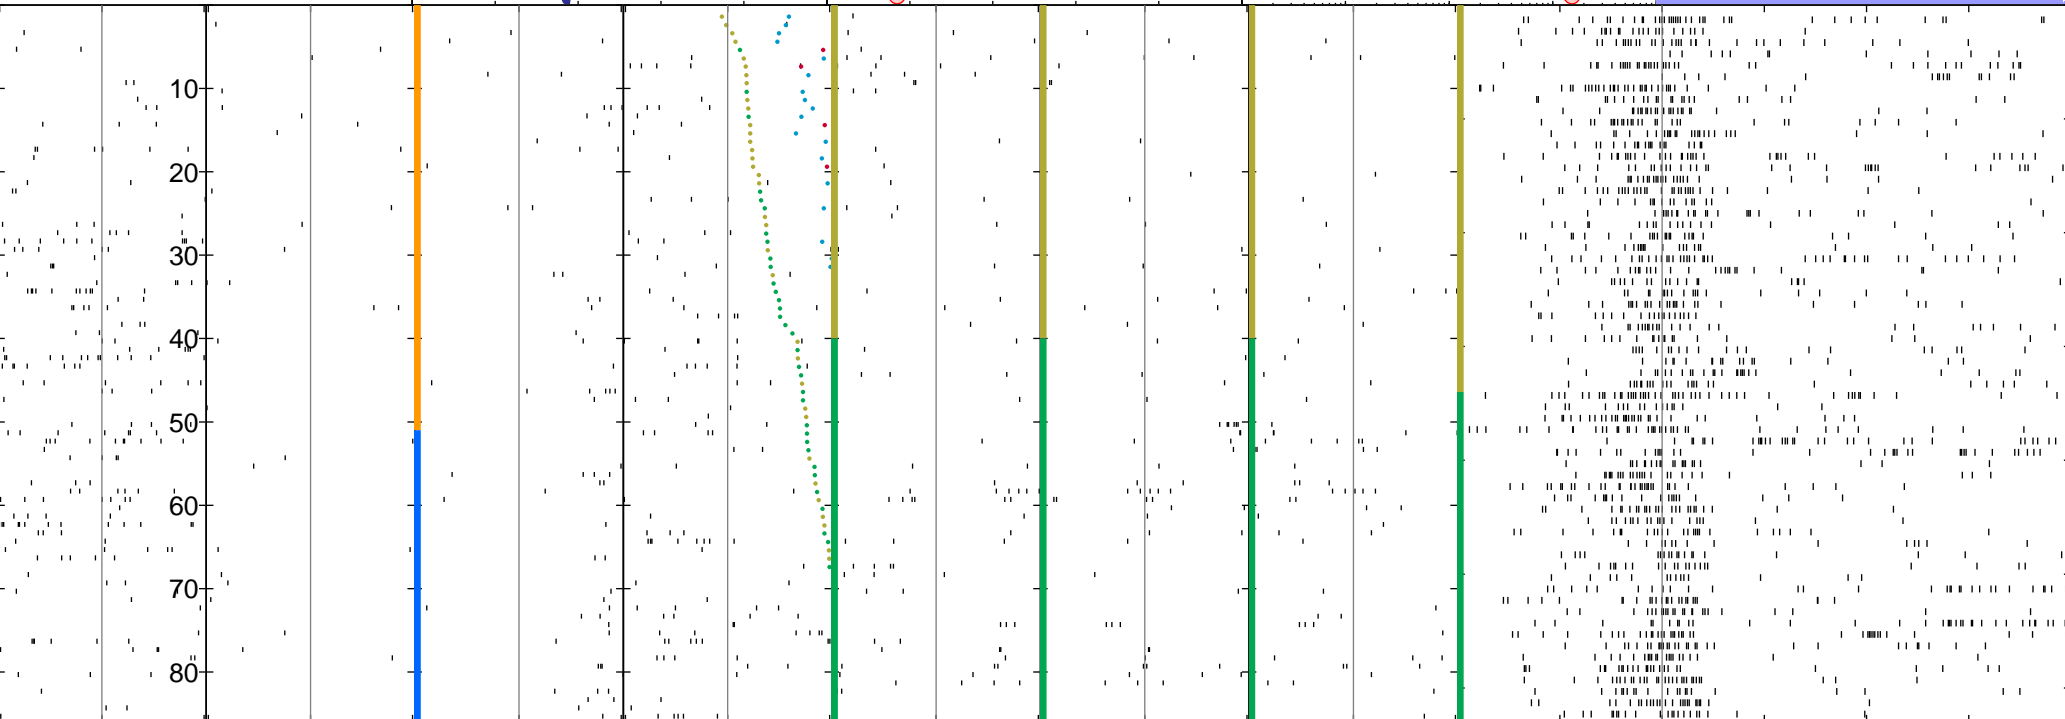

1 Cue On [85] 2 Nose In [85] 3 Tone [50,35] 4 Go [85] 5 Choice [39,46] 6 Side In [39,46] 7 Nose Out [39,46] 8 Reward [33,29]

35  
30  
25  
20  
15  
10  
5

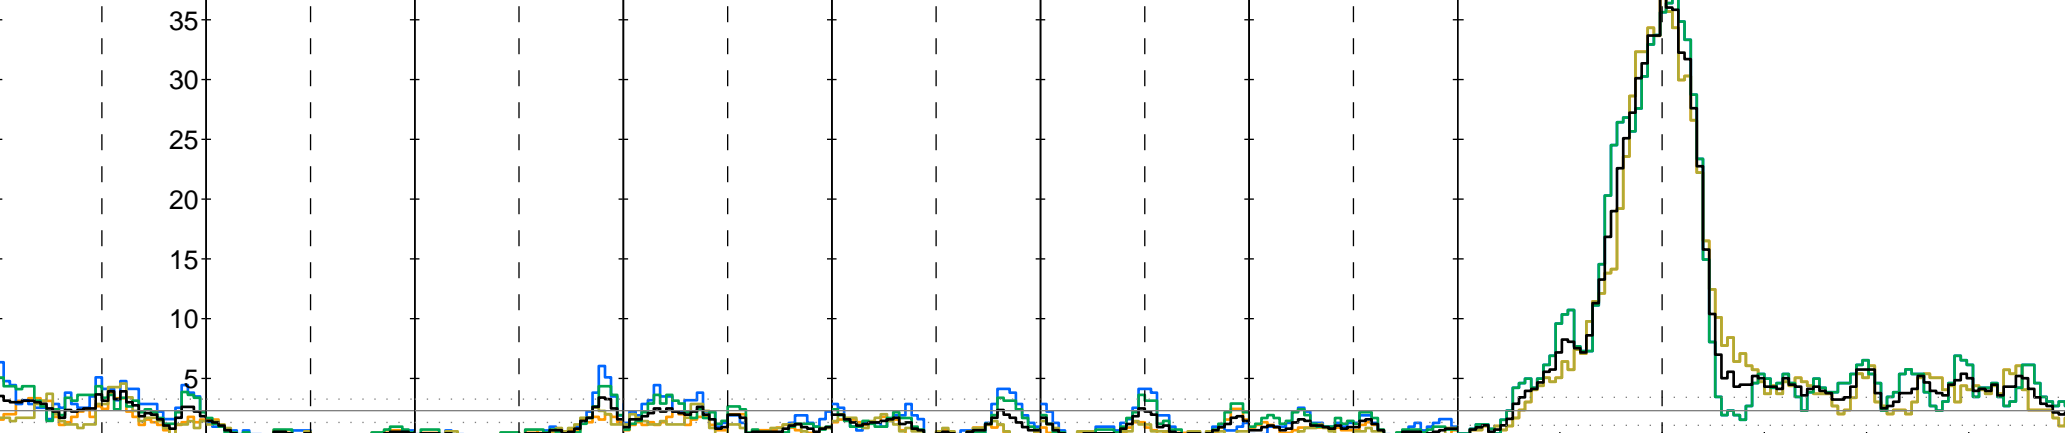



Cell: C0320070613T07c

AP: 0.96 ML: 3.6 DV: 5.3

w: 3 n: 3146  $P_{ISI>2}$ : 0.89

1/2pw: 280 $\mu$ s p $\rightarrow$ v: 1011 $\mu$ s

$\beta_T$ : -1.5  $\beta_D$ : 1.8

$\beta_P$ : -1.3 SI: NaN

Session FR: 0.817 Hz

Pk Ev: 8 - Reward (T2/Ipsi)

Pk FR: 14.7Hz (-0.01s) MSN

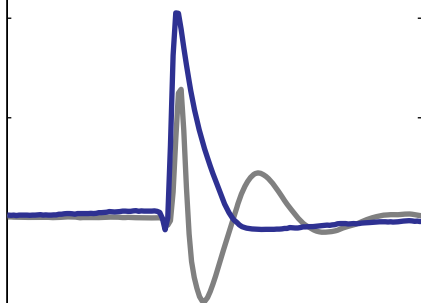

HP/PV

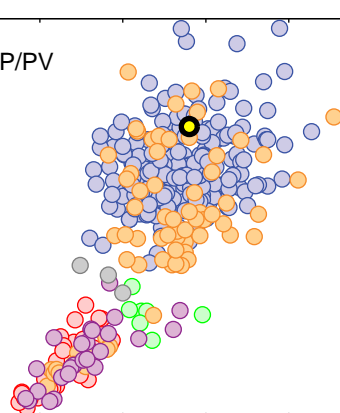

FR/PV

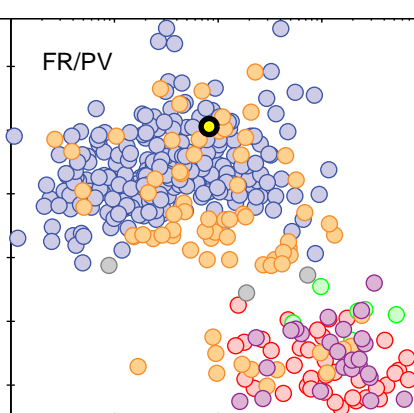

ISI Histogram [88]

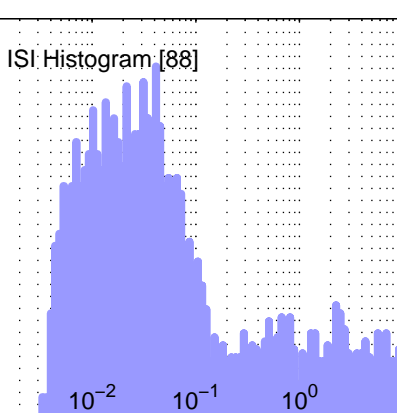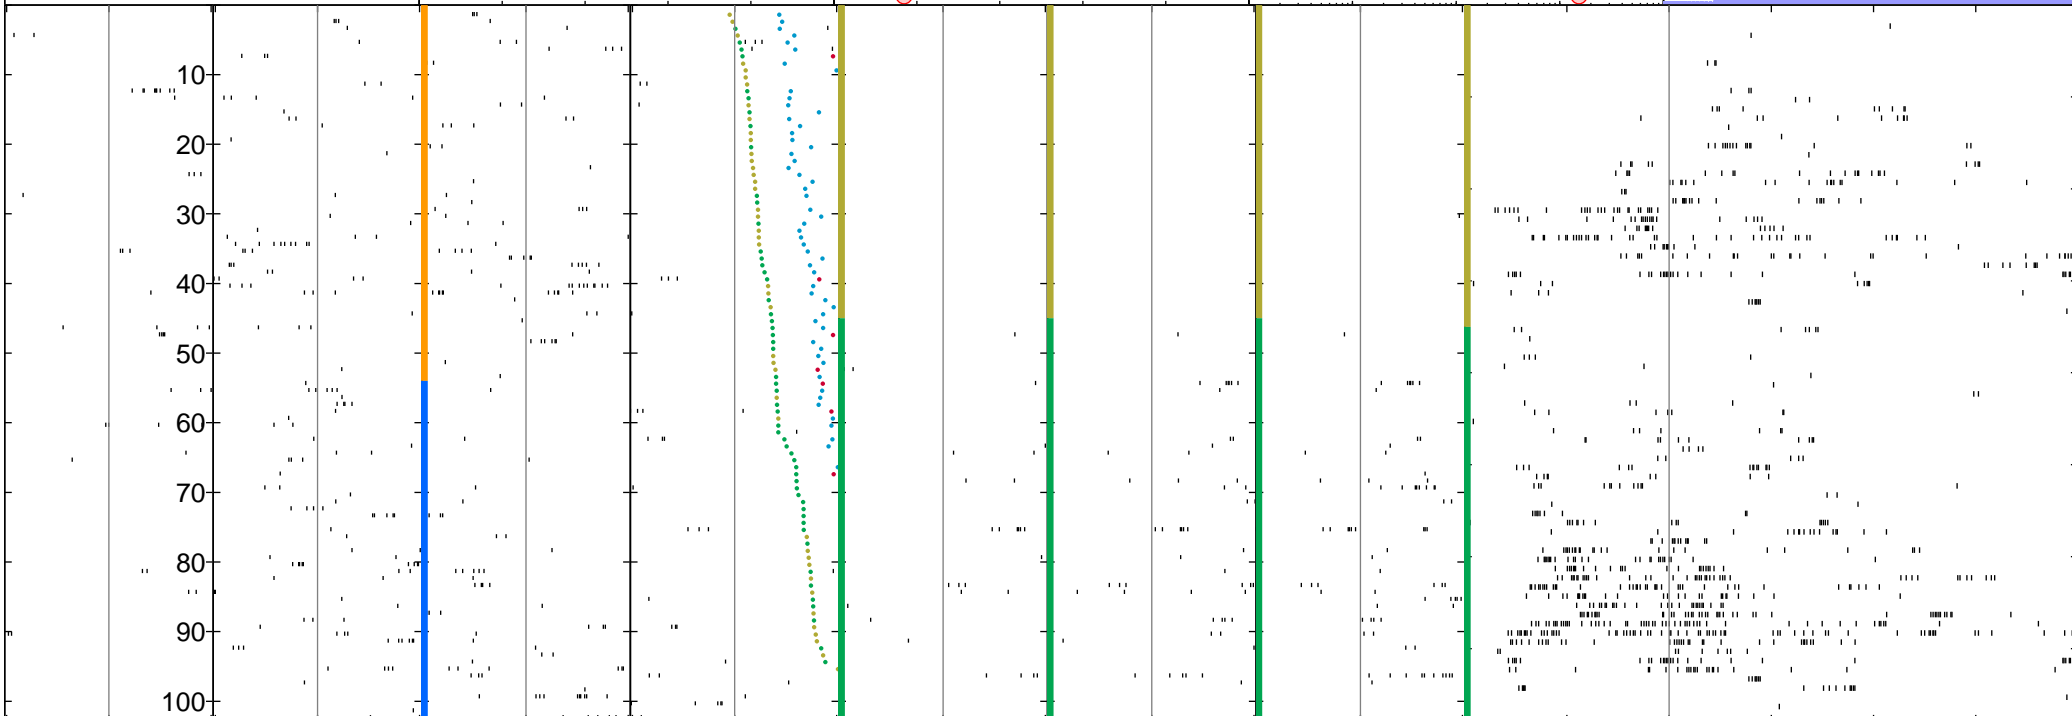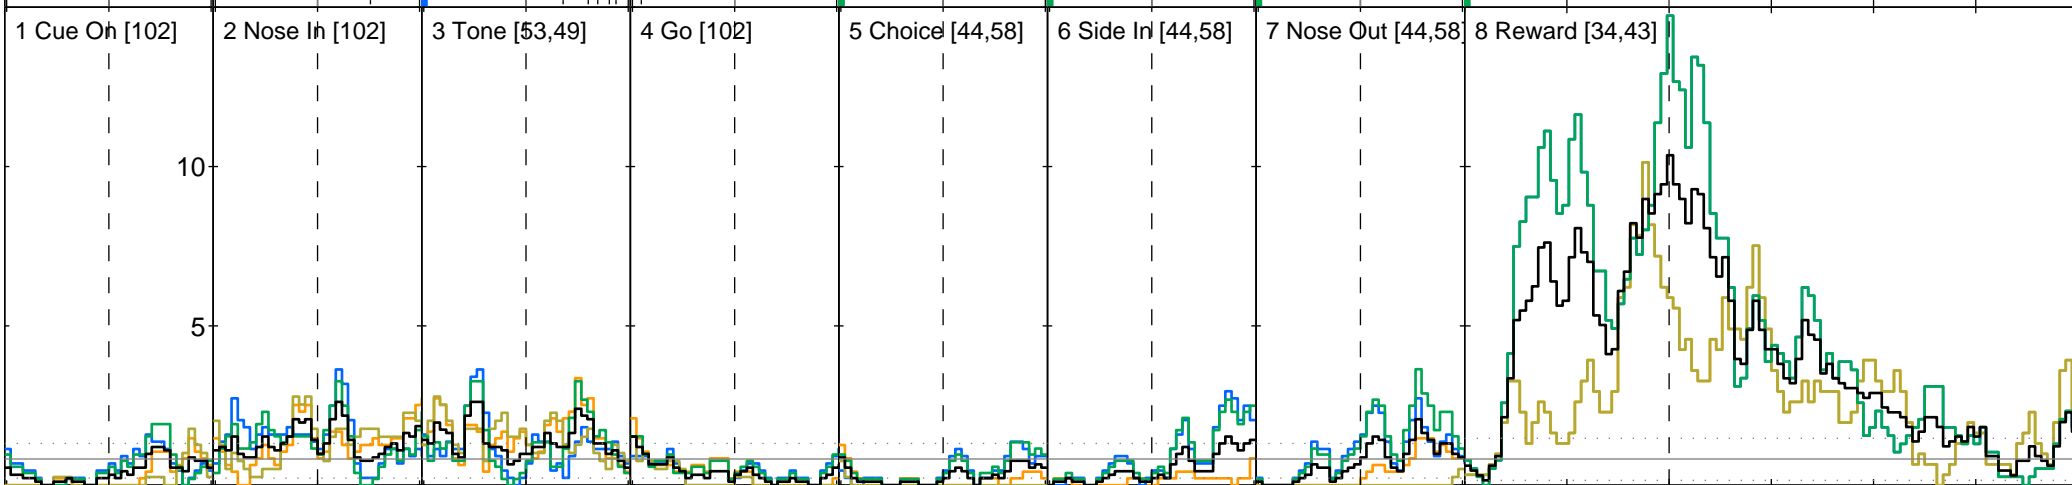

Cell: C0320070630T09j

AP: 1.6 ML: 3.7 DV: 6.2

w: 4 n: 2688  $P_{ISI>2}$ : 0.9

1/2pw: 318 $\mu$ s p $\rightarrow$ v: 827 $\mu$ s

$\beta_T$ : 1.6  $\beta_D$ : -1.9

$\beta_P$ : 2.6 SI: NaN

Session FR: 0.904 Hz

Pk Ev: 8 - Reward (T2/Ipsi)

Pk FR: 34.3Hz (-0.01s) MSN

Waveform

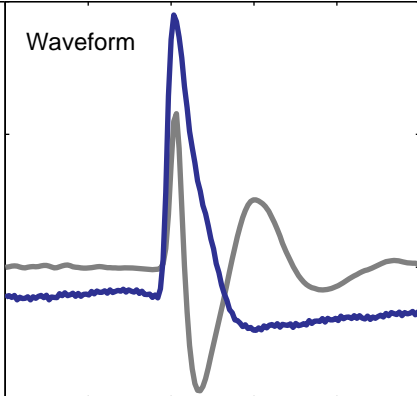

HP/PV

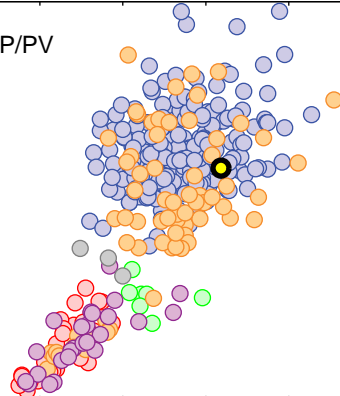

FR/PV

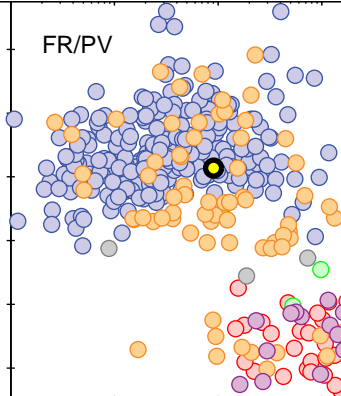

ISI Histogram [72]

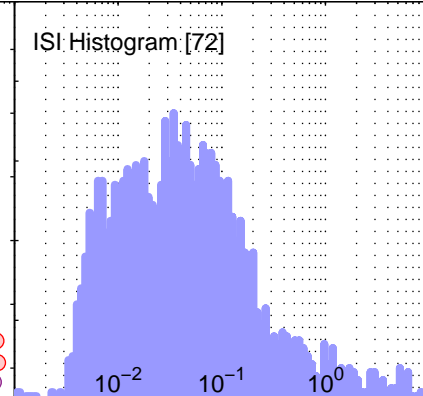

10

20

30

40

50

60

70

80

1 Cue On [82]

2 Nose In [82]

3 Tone [38,44]

4 Go [82]

5 Choice [35,47]

6 Side In [35,47]

7 Nose Out [35,47]

8 Reward [26,35]

35

30

25

20

15

10

5



Cell: C0320070701T09c

AP: 1.6 ML: 3.7 DV: 6.3

w: 2 n: 2907  $P_{ISI>2}$ : 0.92

1/2pw: 261 $\mu$ s p $\rightarrow$ v: 931 $\mu$ s

$\beta_T$ : NaN  $\beta_D$ : NaN

$\beta_P$ : NaN SI: NaN

Session FR: 0.519 Hz

Pk Ev: 8 - Reward (T1/Con)

Pk FR: 24.1Hz (0.02s) MSN

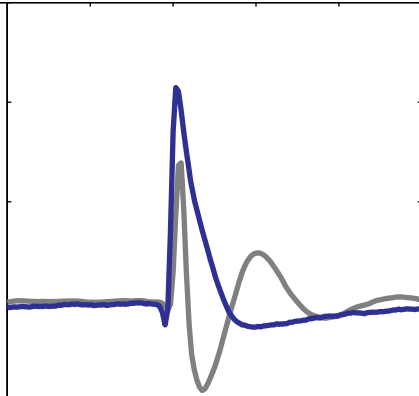

HP/PV

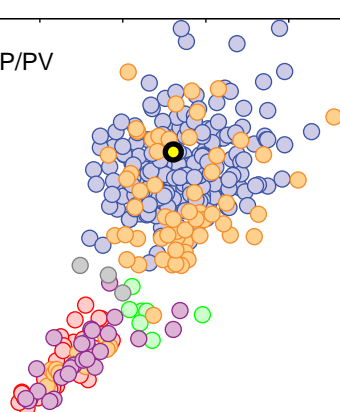

FR/PV

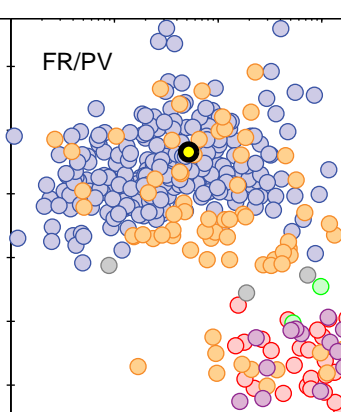

ISI Histogram [71]

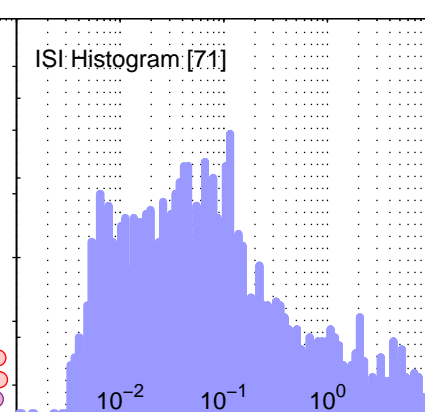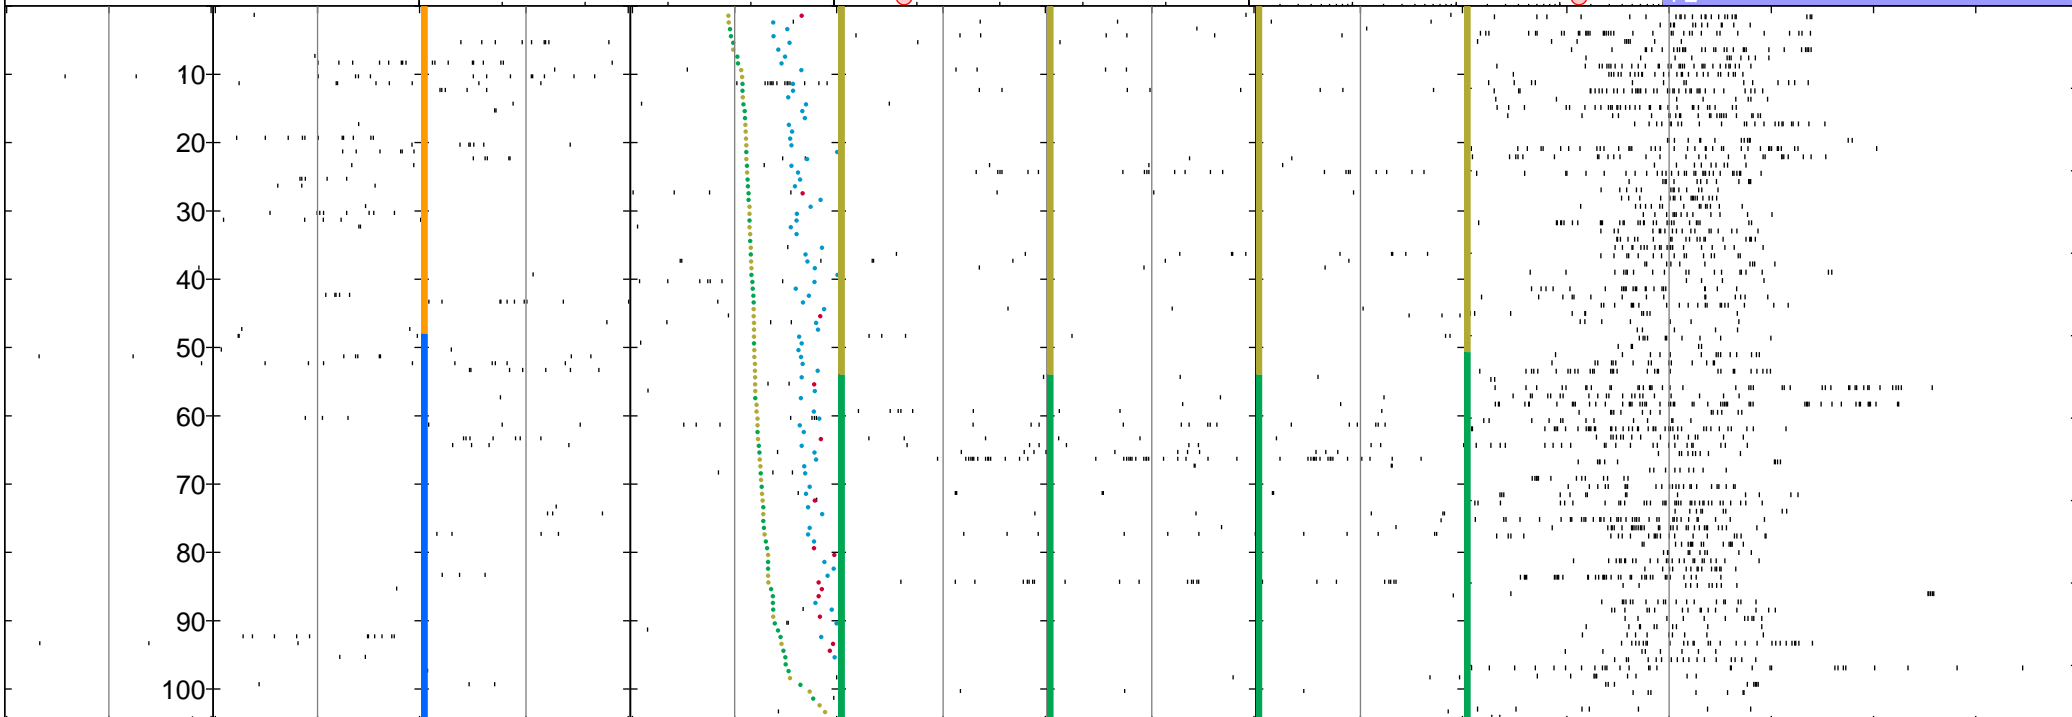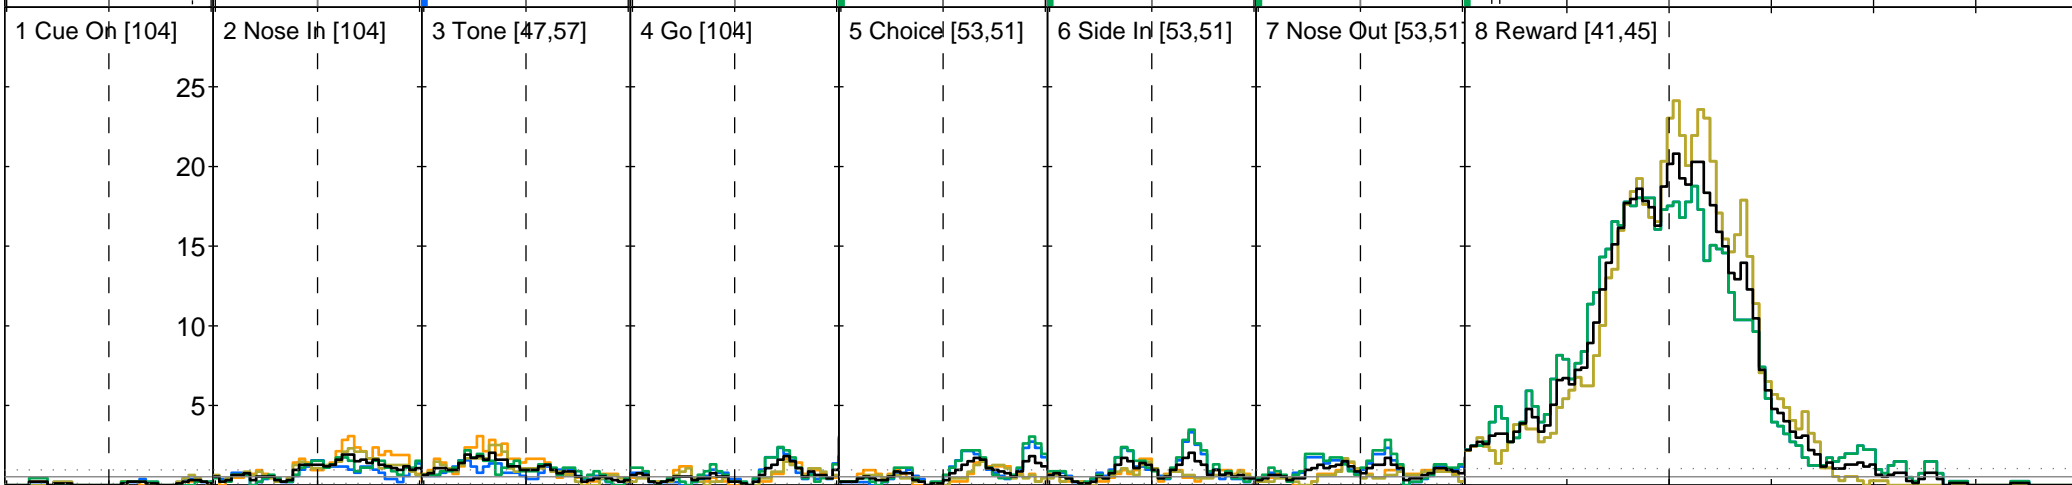

**Cell: C0320070621T09d**

AP: 1.6 ML: 3.7 DV: 5.1  
w: 1 n: 204  $P_{ISI>2}$ : 0.98  
1/2pw: 254 $\mu$ s p->v: 691 $\mu$ s  
 $\beta_T$ : NaN  $\beta_D$ : NaN  
 $\beta_P$ : NaN SI: NaN  
Session FR: 0.136 Hz  
Pk Ev: 8 - Reward (T2/Ipsi)  
Pk FR: 5.56Hz (0.05s) **MSN**

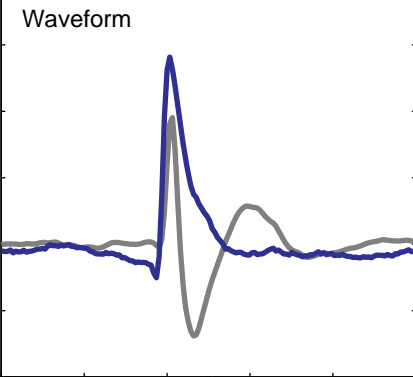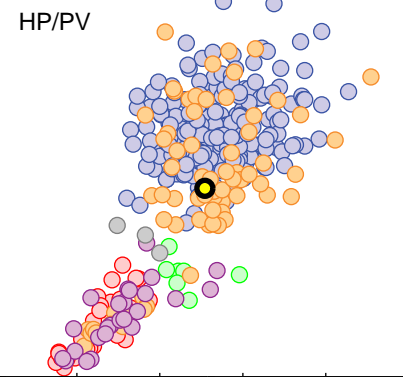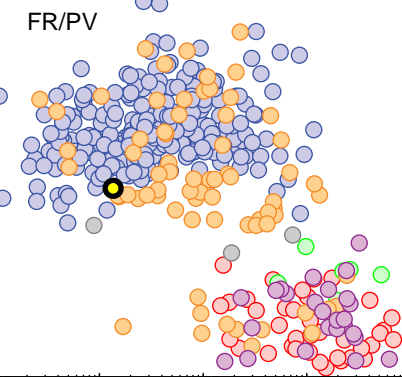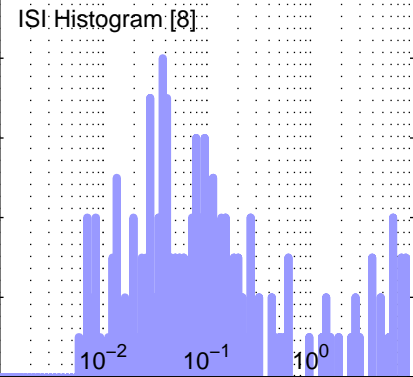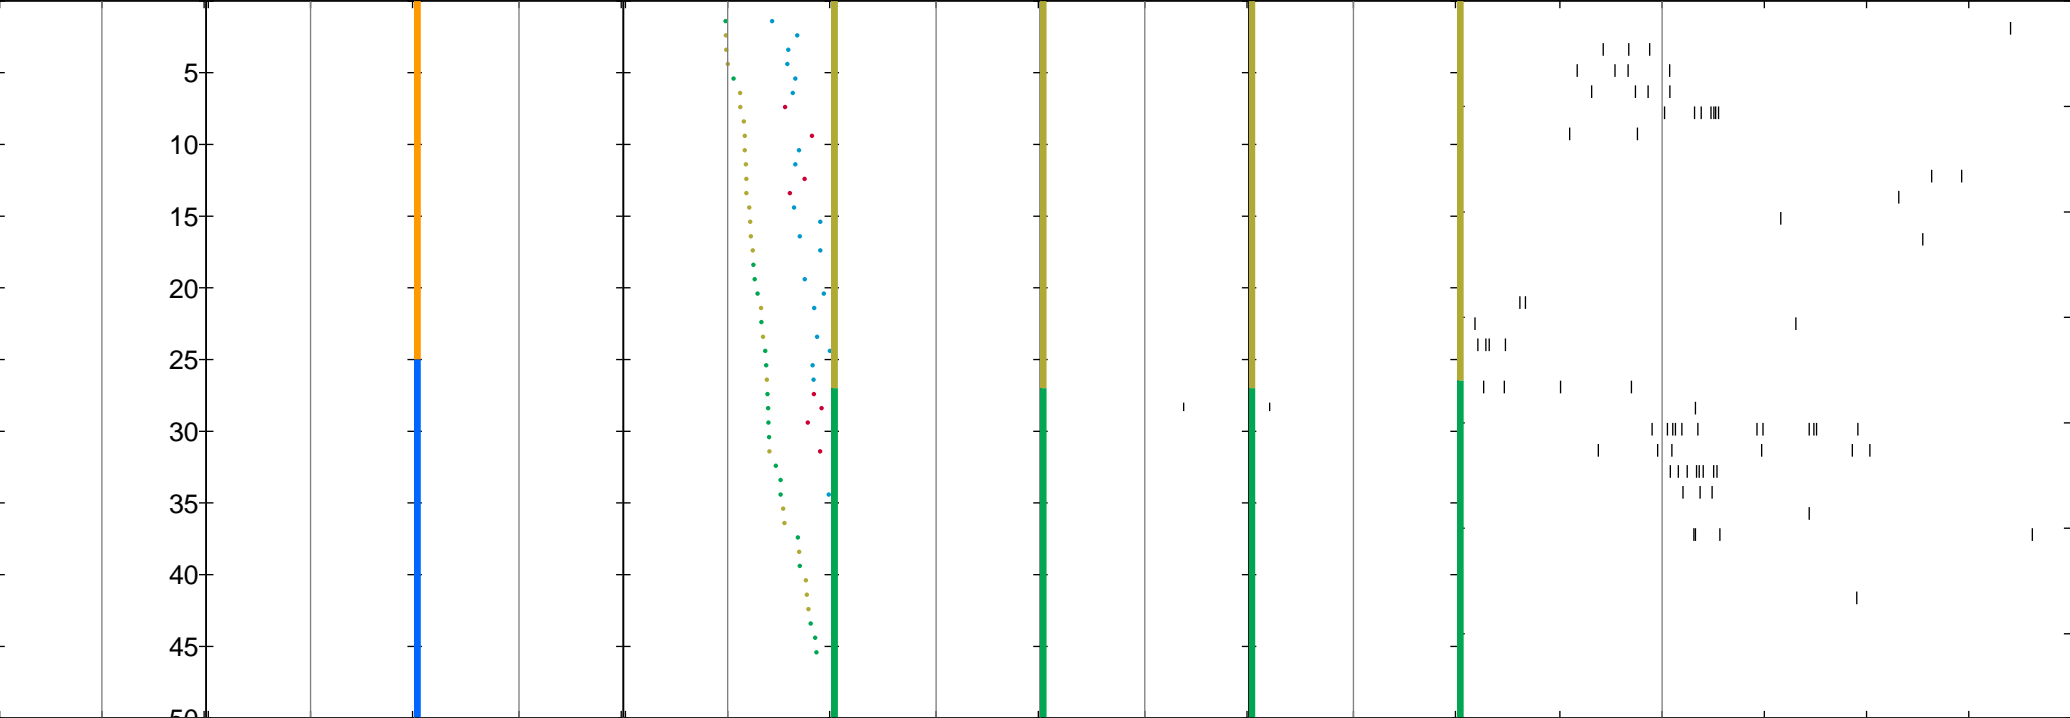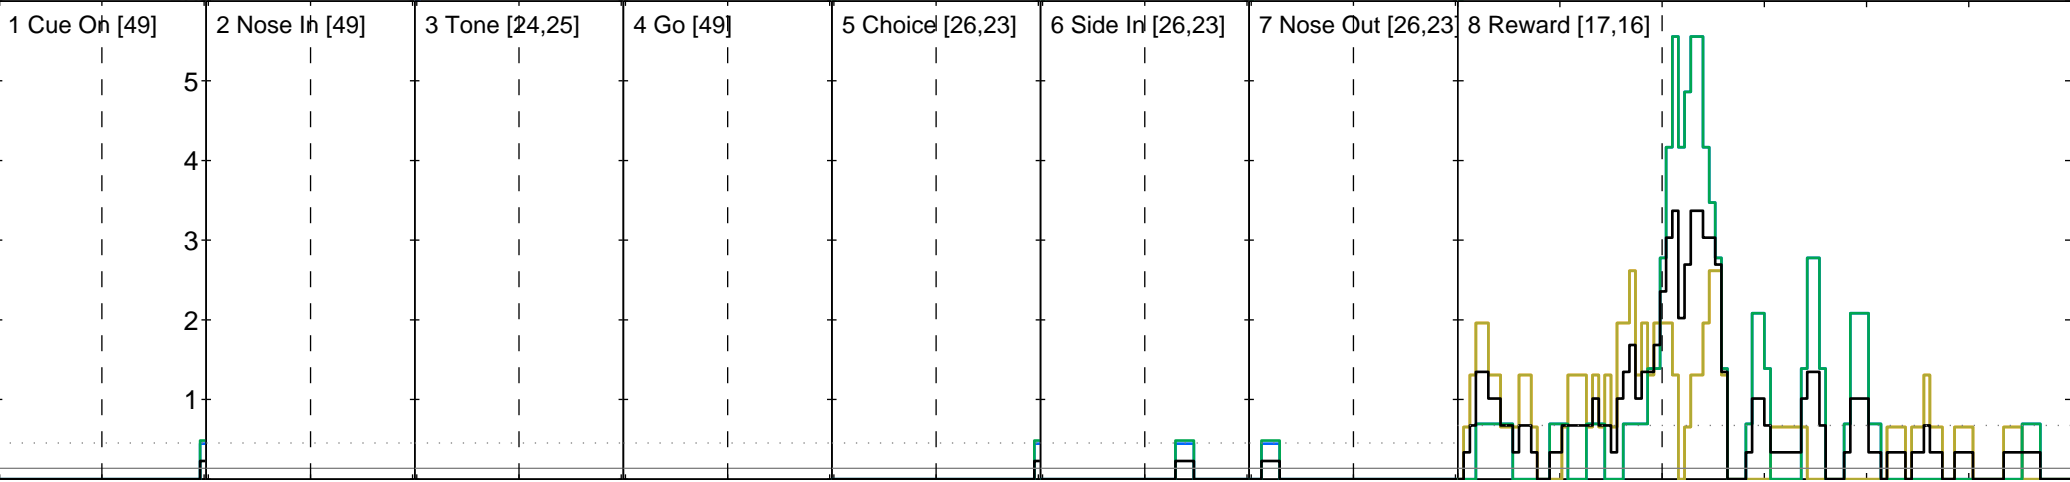

**Cell: C0520070416T05b**

AP: 2.2 ML: 1.2 DV: 8.2

w: 4 n: 15207  $P_{ISI>2}$ : 0.061/2pw: 218 $\mu$ s p $\rightarrow$ v: 749 $\mu$ s $\beta_T$ : 3.2  $\beta_D$ : -2.4 $\beta_P$ : -3.1 SI: 0.66

Session FR: 3.42 Hz

Pk Ev: 8 - Reward (T2/Ipsi)

Pk FR: 14Hz (0.05s) **MSN**

## Waveform

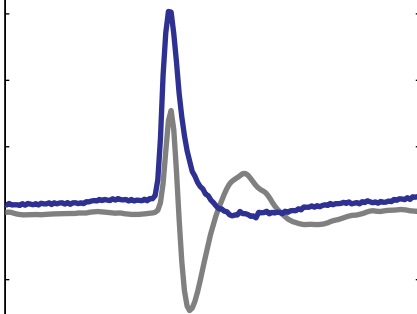

## HP/PV

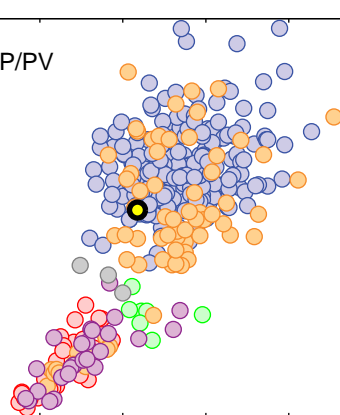

## FR/PV

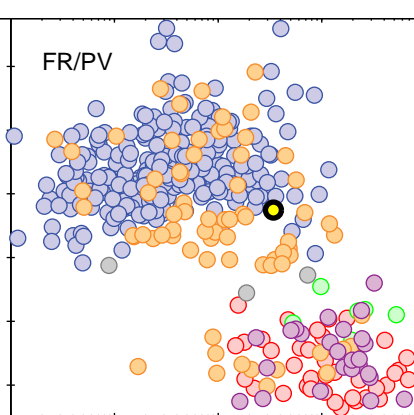

## ISI Histogram [478]

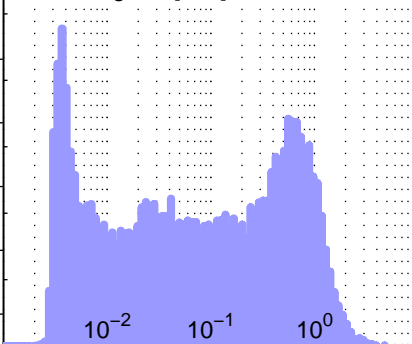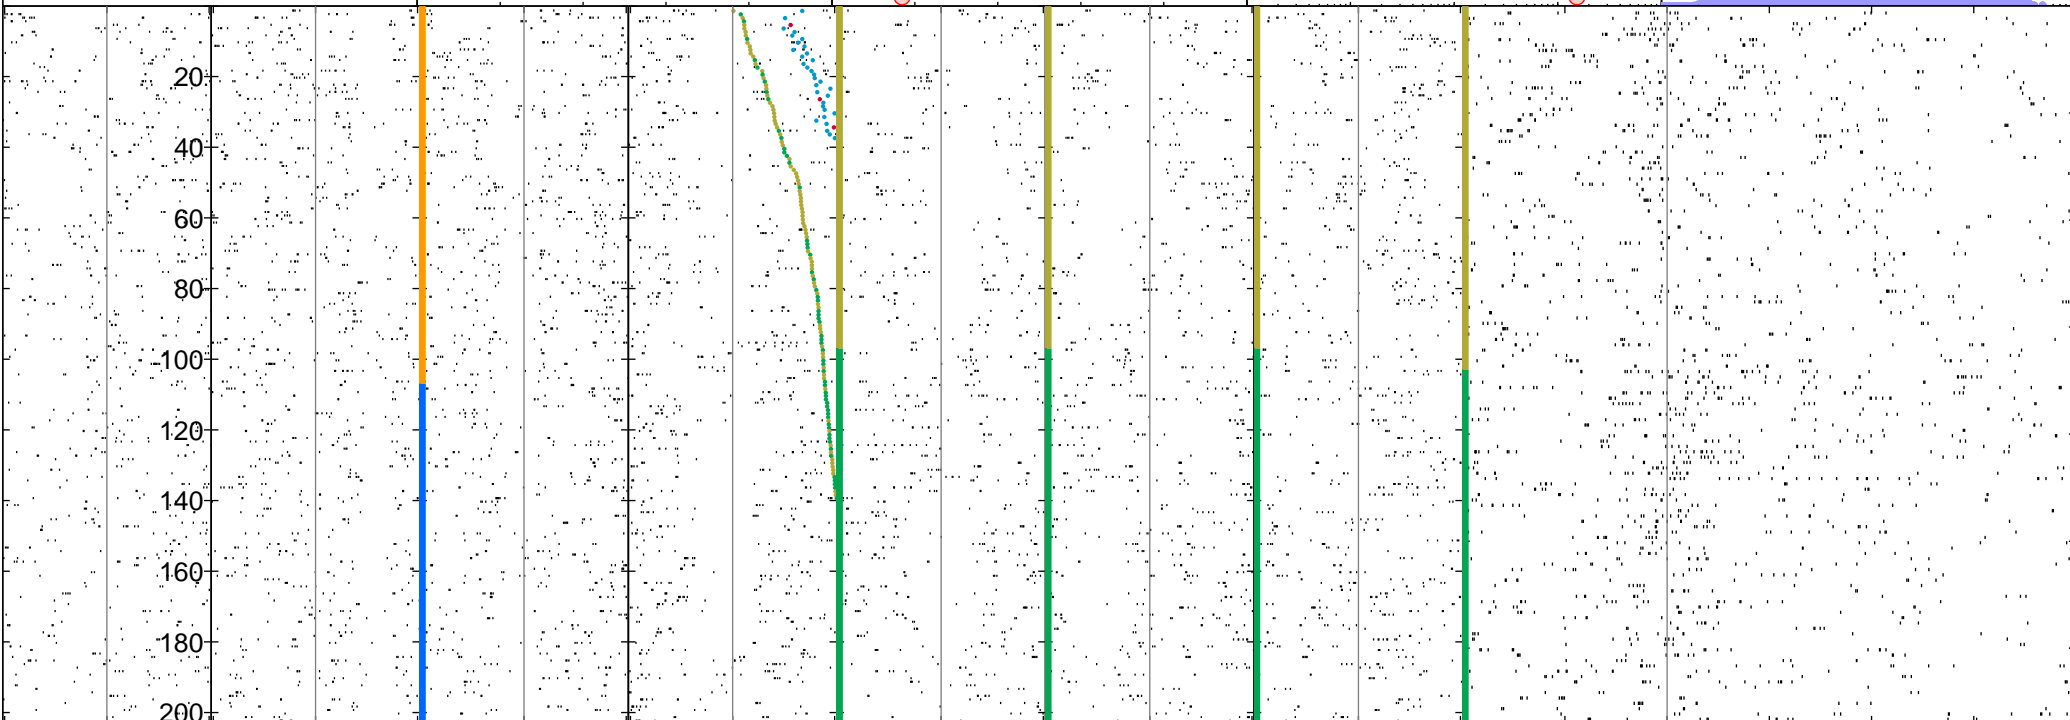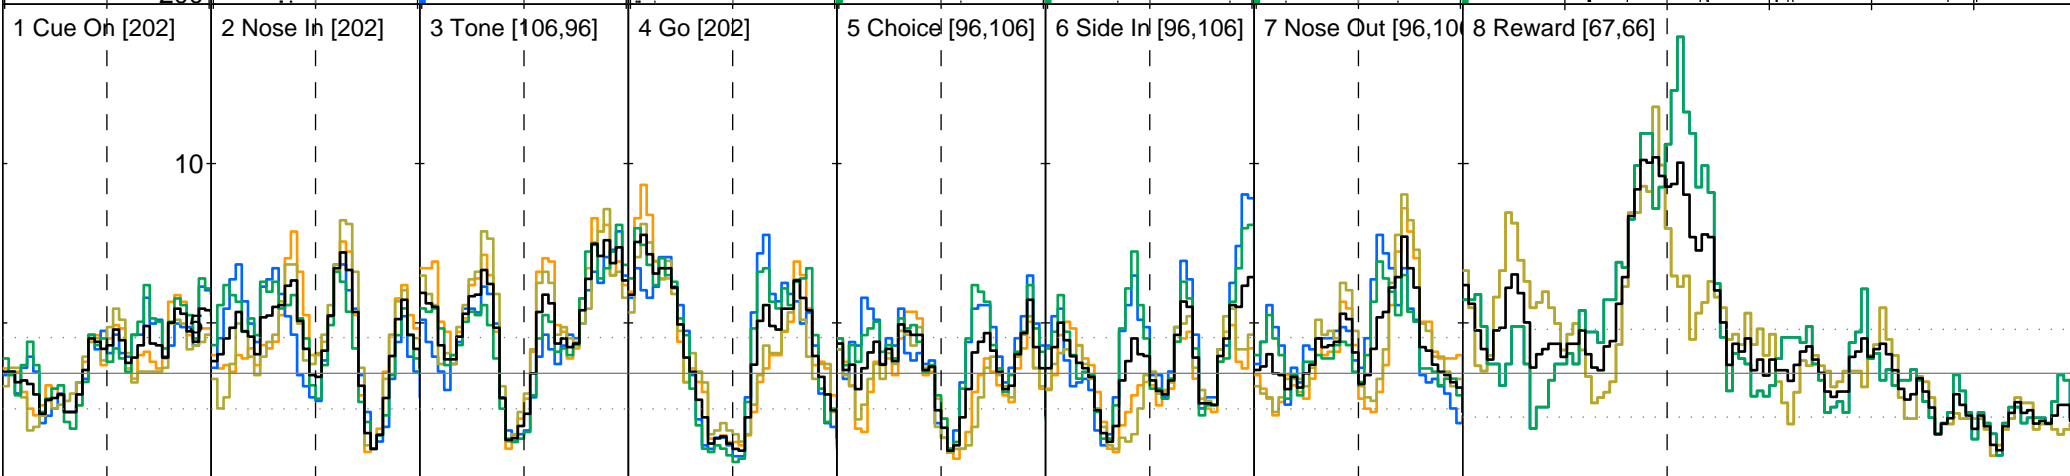

**Cell: C0320070613T09c**

AP: 1.6 ML: 3.7 DV: 4.7  
w: 2 n: 3589  $P_{ISI>2}$ : 0.68  
1/2pw: 302 $\mu$ s p $\rightarrow$ v: 1005 $\mu$ s  
 $\beta_T$ : NaN  $\beta_D$ : NaN  
 $\beta_P$ : NaN SI: NaN  
Session FR: 1.29 Hz  
Pk Ev: 8 - Reward (T1/Con)  
Pk FR: 32.1Hz (0.08s) **MSN**

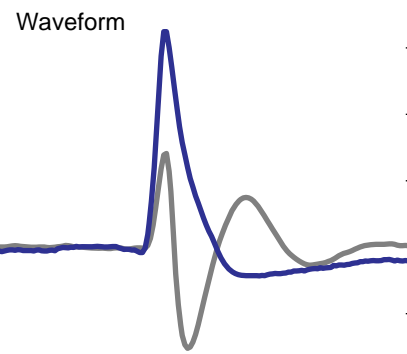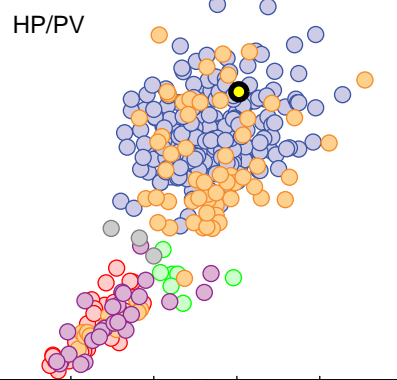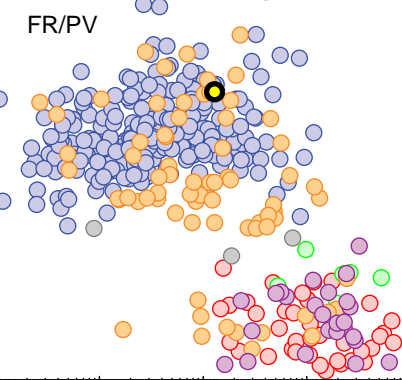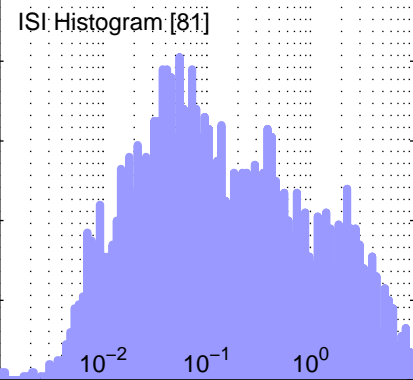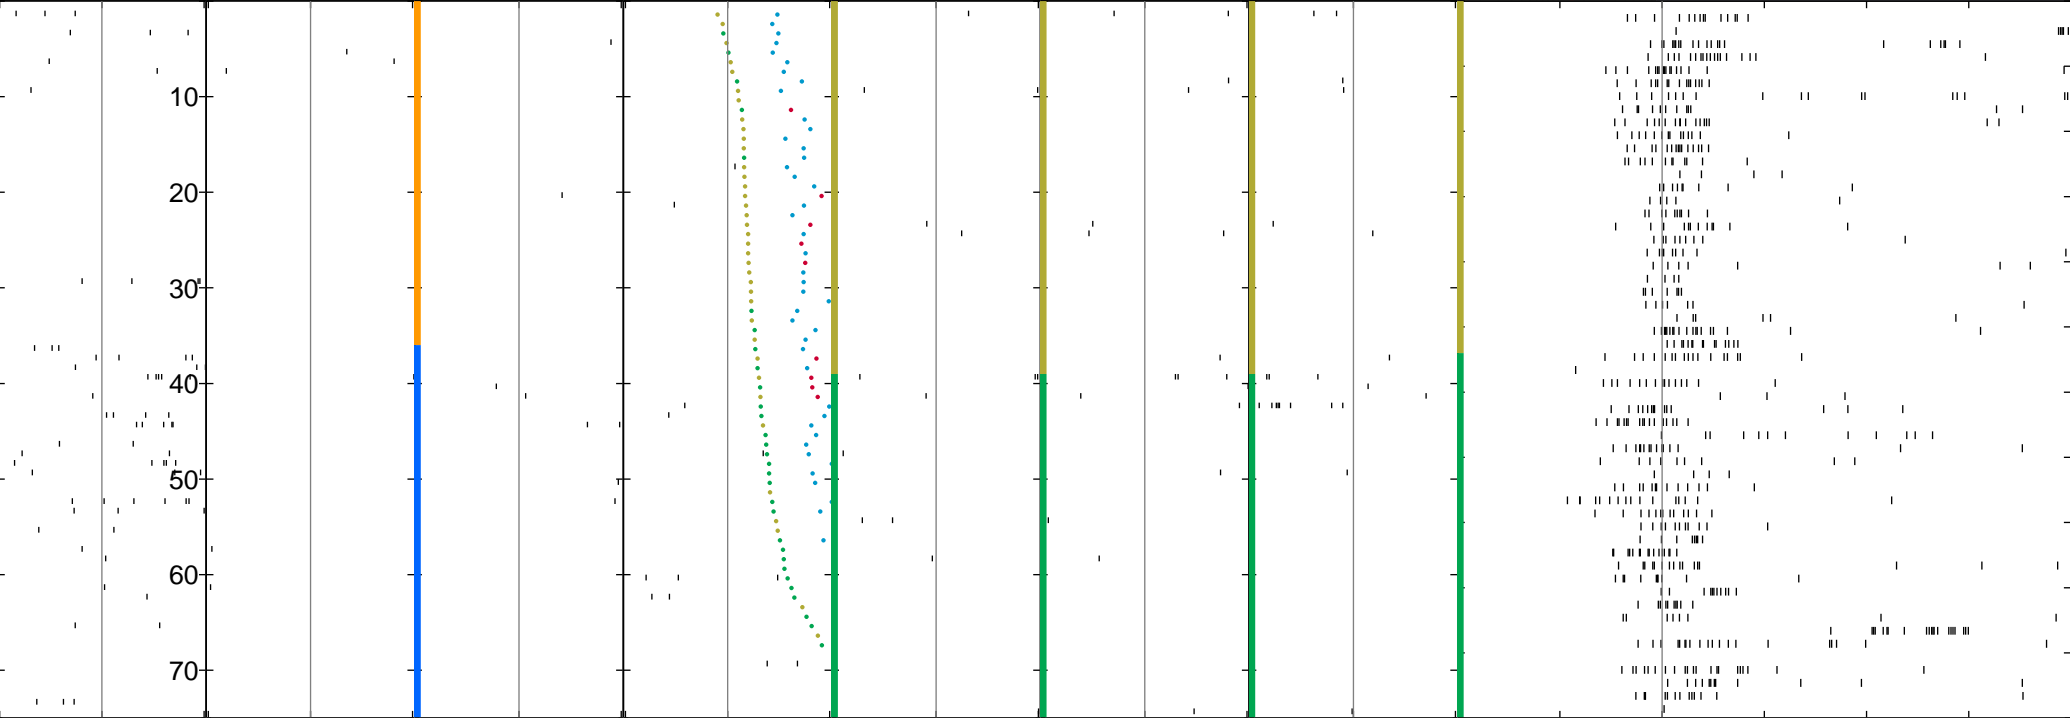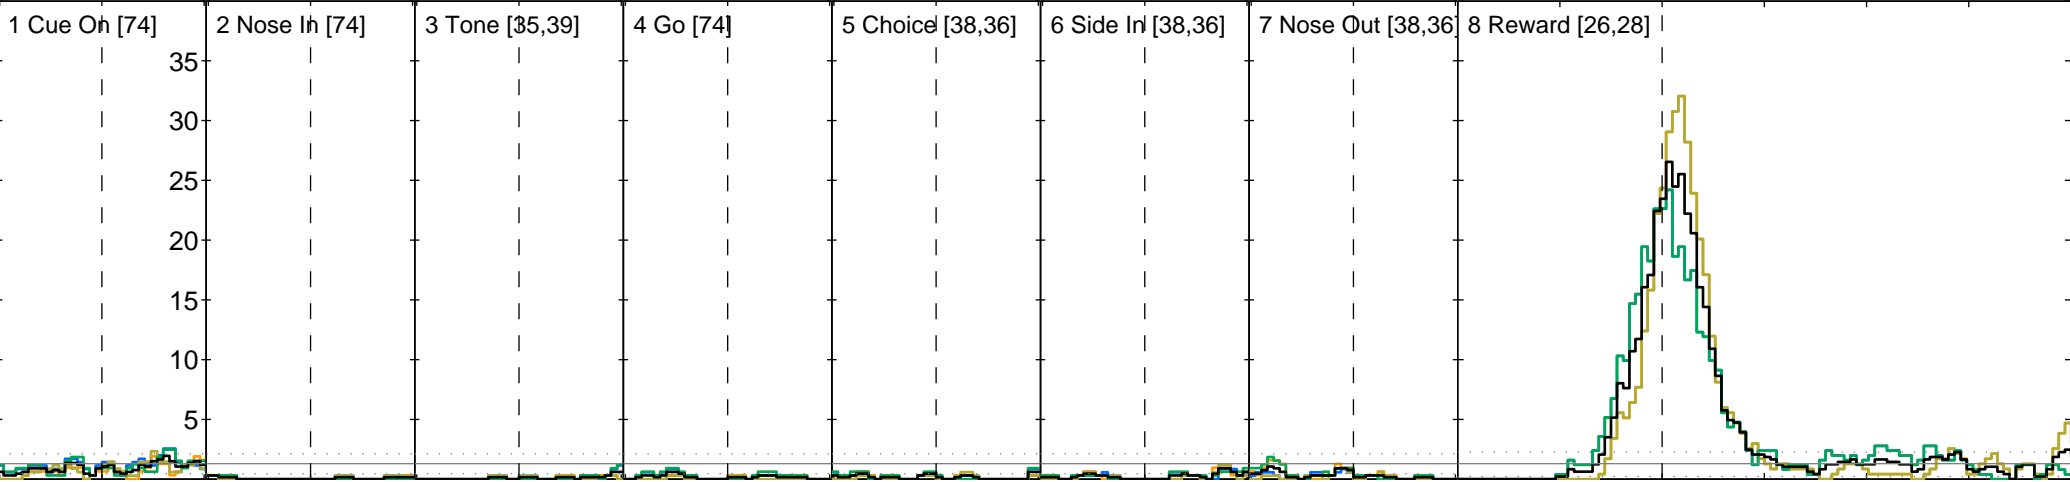



**Cell: C0320070626T07b**

AP: 0.96 ML: 3.6 DV: 6.8

w: 4 n: 3819  $P_{ISI>2}$ : 0.751/2pw: 395 $\mu$ s p->v: 954 $\mu$ s $\beta_T$ : NaN  $\beta_D$ : NaN $\beta_P$ : NaN SI: NaN

Session FR: 1.02 Hz

Pk Ev: 8 - Reward (T2/Ipsi)

Pk FR: 8.5Hz (0.11s) **MSN**

Waveform

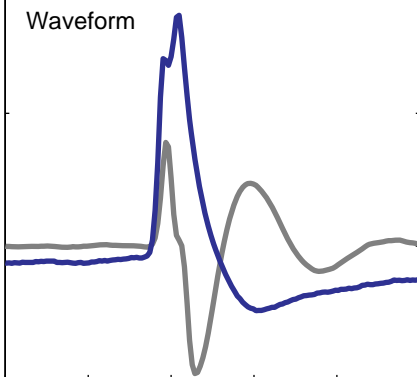

HP/PV

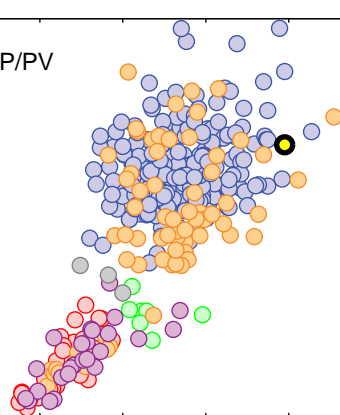

FR/PV

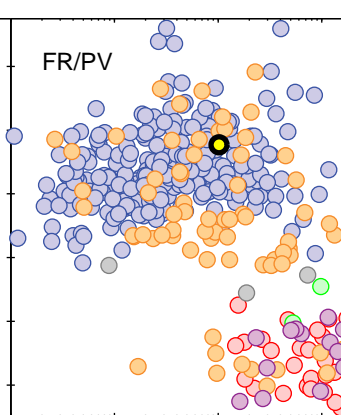

ISI Histogram [123]

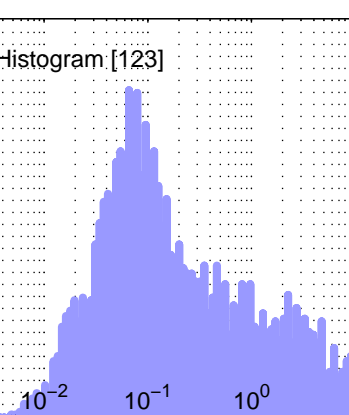

10

20

30

40

50

60

70

80

1 Cue On [88]

2 Nose In [88]

3 Tone [43,45]

4 Go [88]

5 Choice [46,42]

6 Side In [46,42]

7 Nose Out [46,42]

8 Reward [35,34]

8

6

4

2

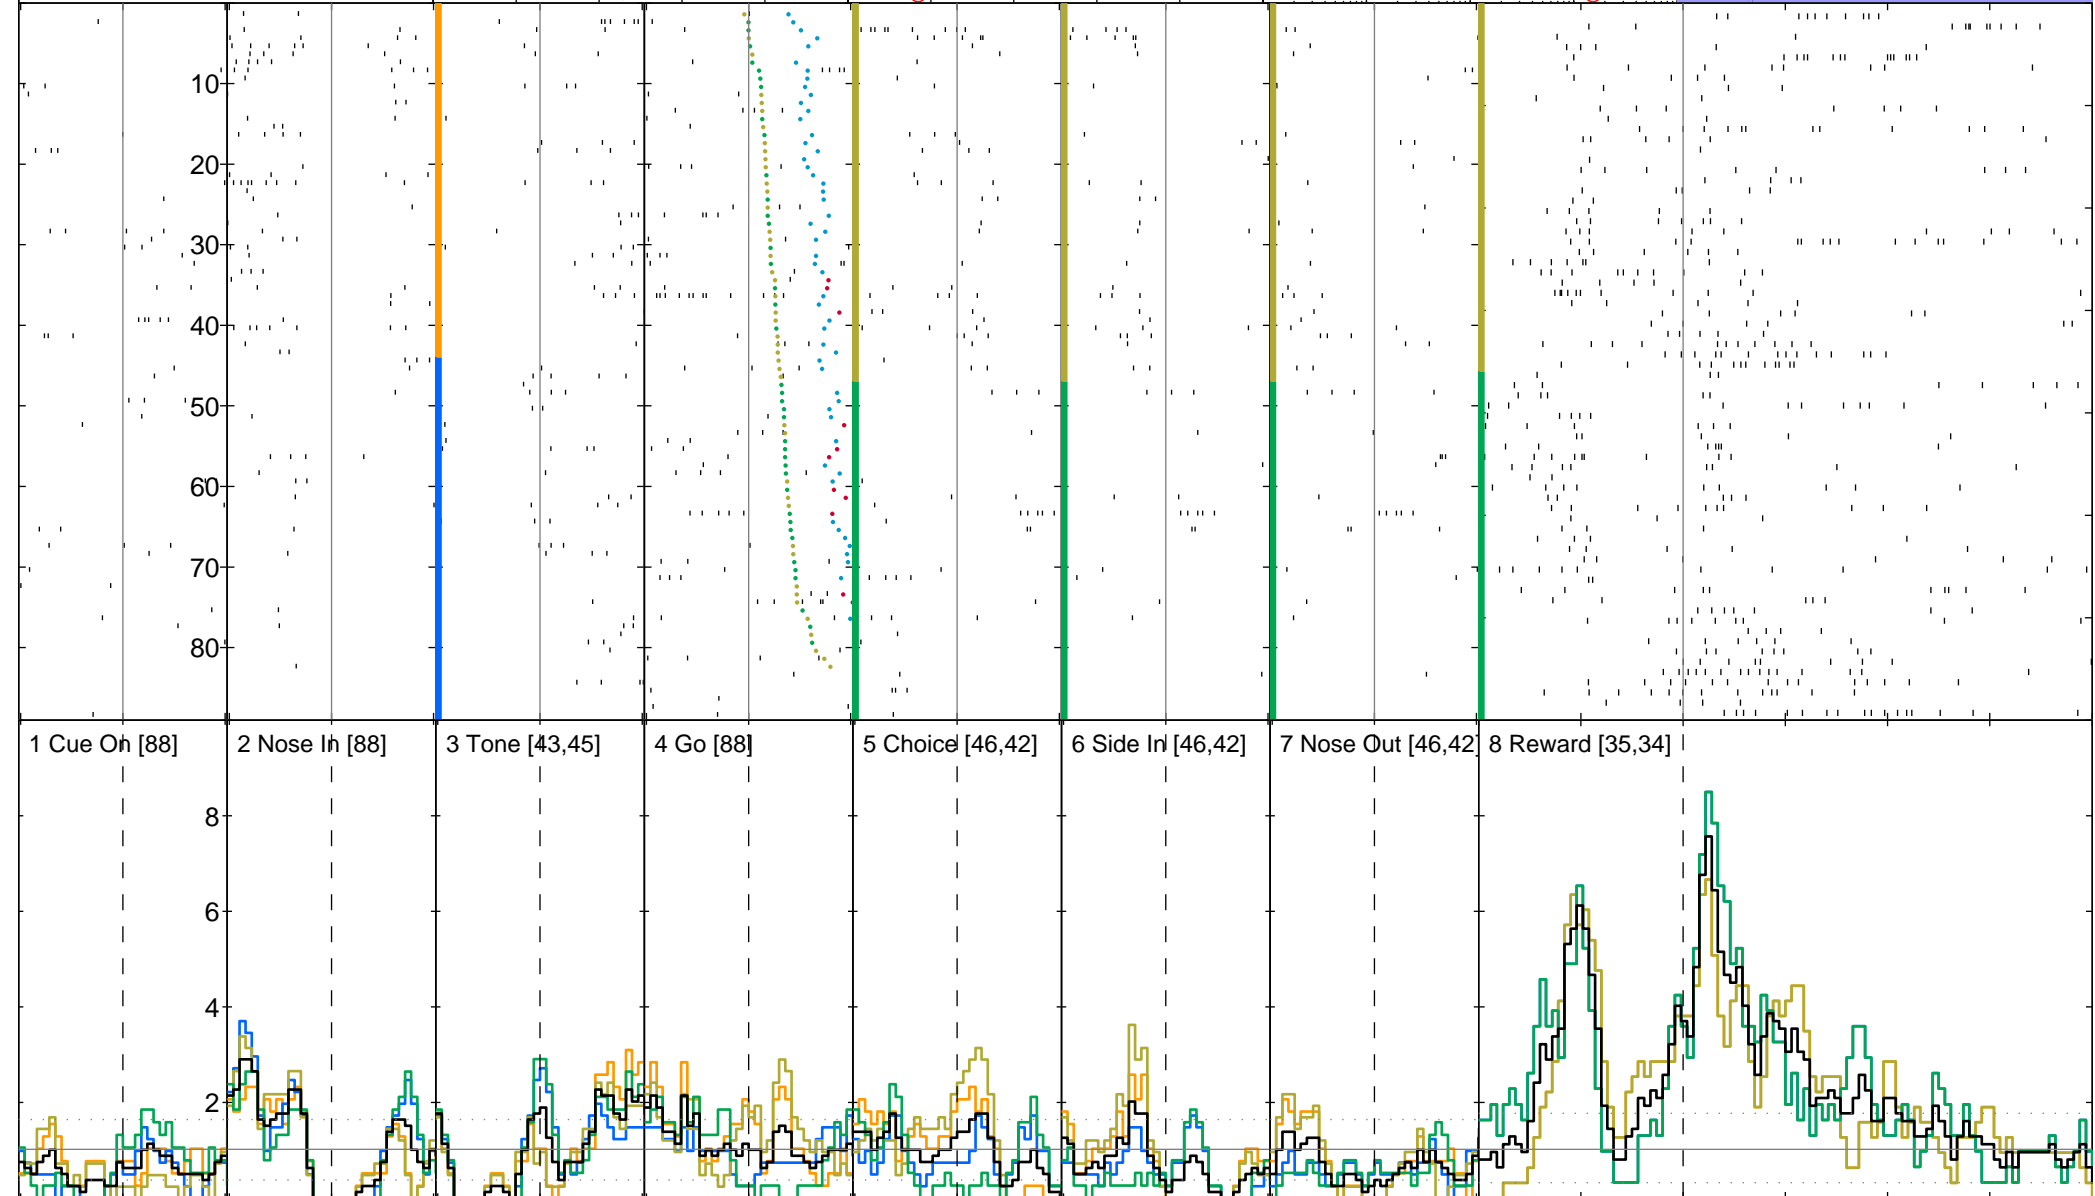

**Cell: C0320070626T07c**

AP: 0.96 ML: 3.6 DV: 6.8

w: 3 n: 271  $P_{ISI>2}$ : 1

1/2pw: 254 $\mu$ s p->v: 811 $\mu$ s

$\beta_T$ : NaN  $\beta_D$ : NaN

$\beta_P$ : NaN SI: NaN

Session FR: 0.0811 Hz

Pk Ev: 8 - Reward (T2/Ipsi)

Pk FR: 14.4Hz (0.11s) **MSN**

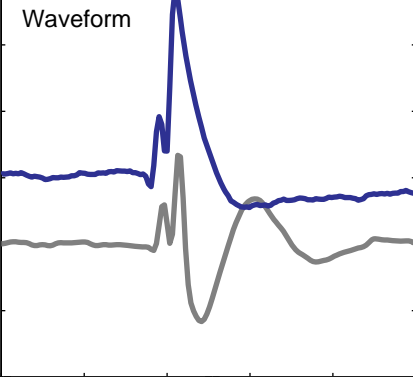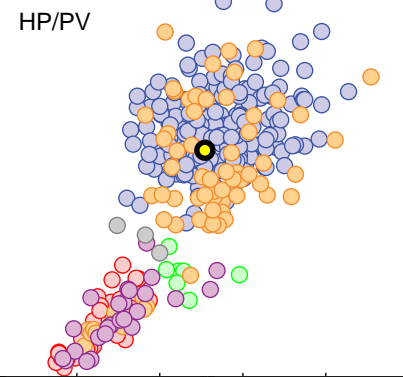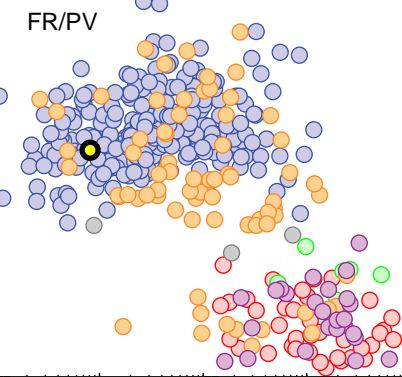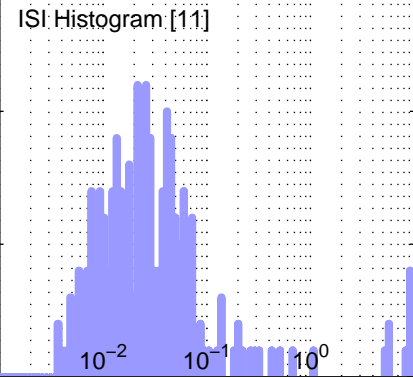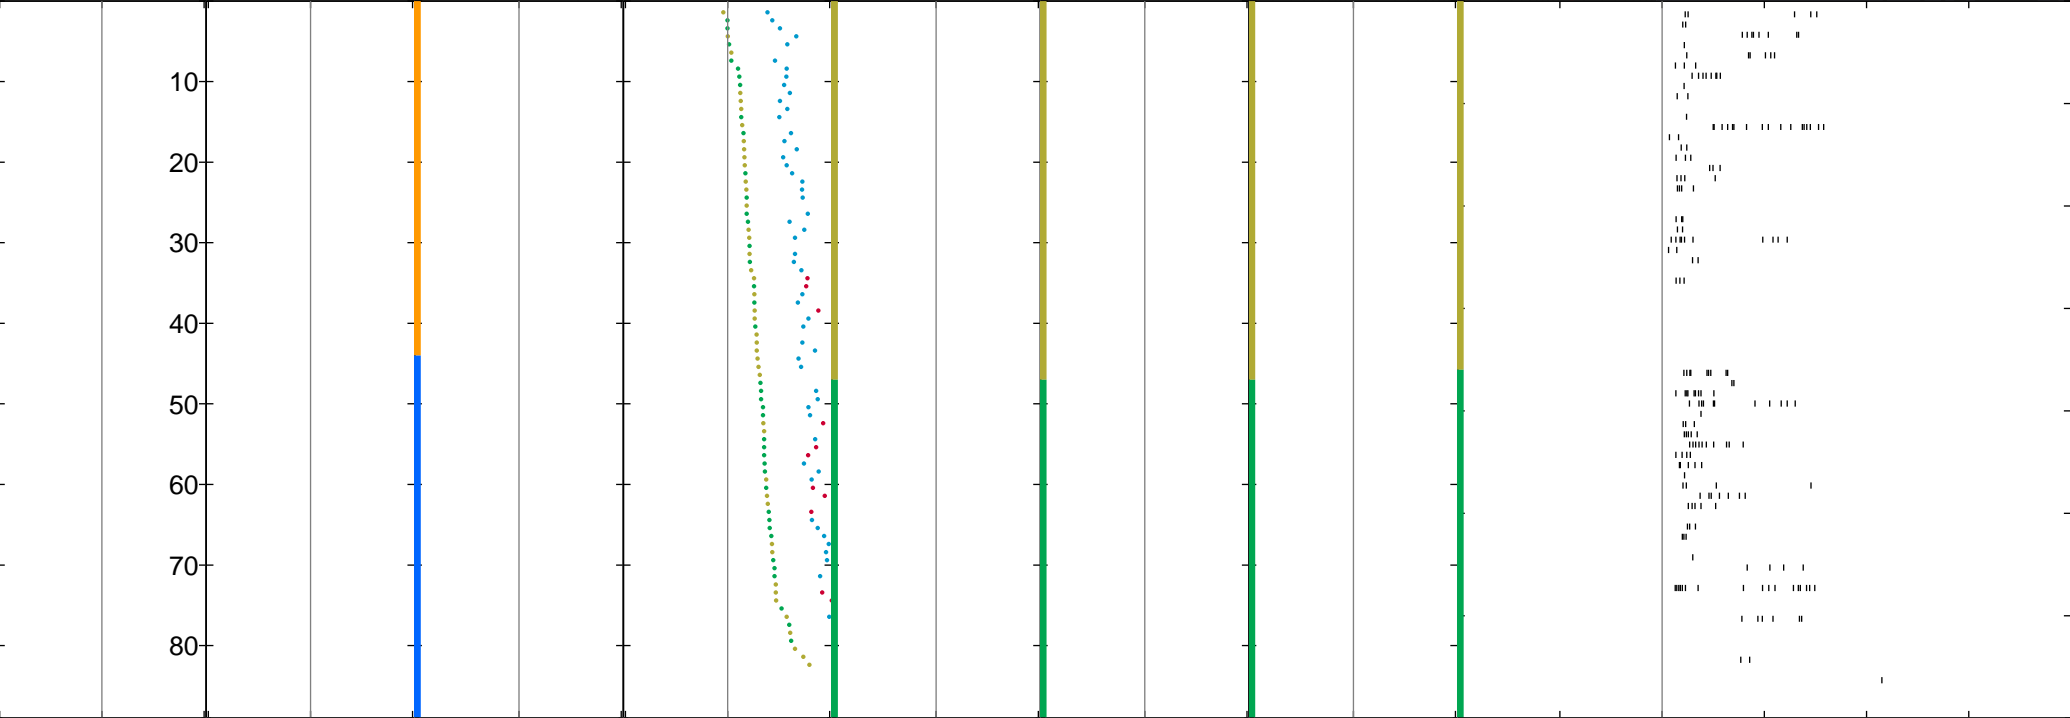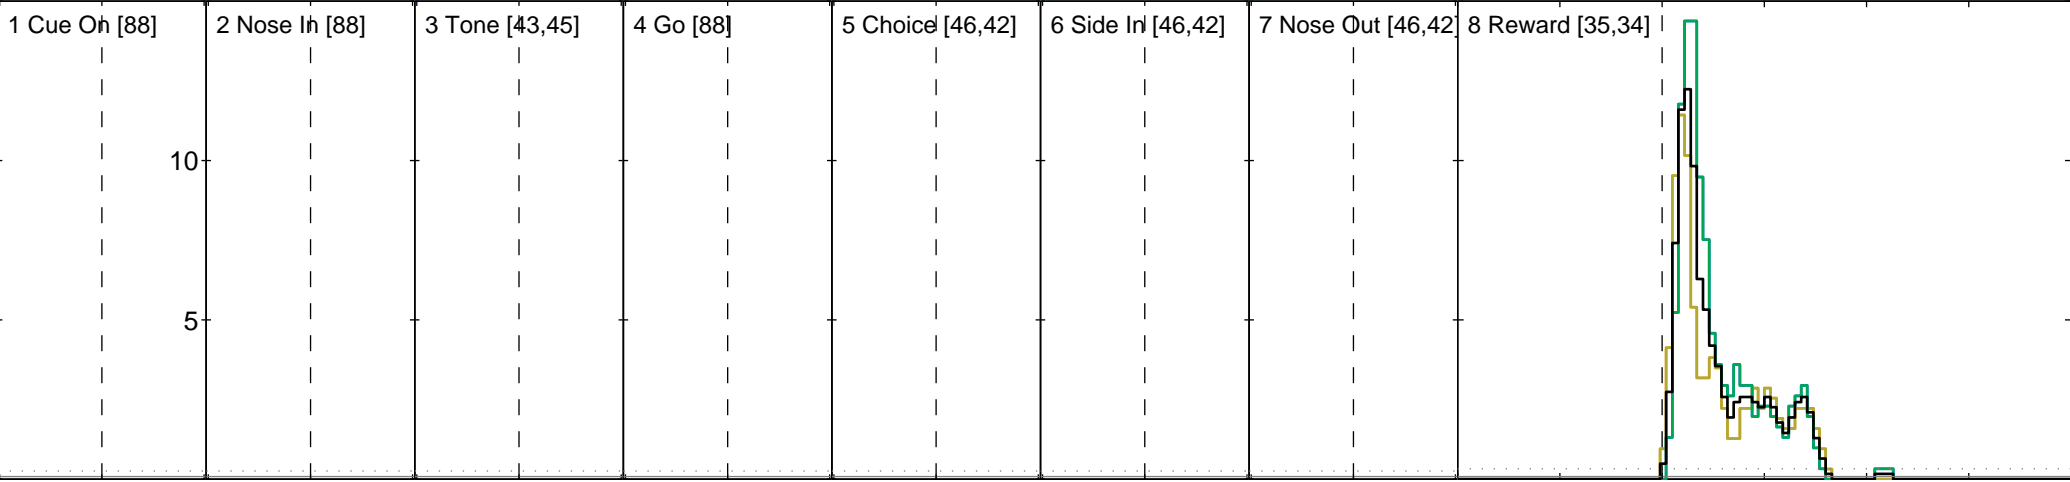

**Cell: C0320070622T07F**

AP: 0.96 ML: 3.6 DV: 6.1

w: 4 n: 4050  $P_{ISI>2}$ : 0.711/2pw: 230 $\mu$ s p->v: 970 $\mu$ s $\beta_T$ : -2.3  $\beta_D$ : 3.9 $\beta_P$ : -1.7 SI: NaN

Session FR: 1.02 Hz

Pk Ev: 8 - Reward (T1/Con)

Pk FR: 8.39Hz (0.14s) **MSN**

Waveform

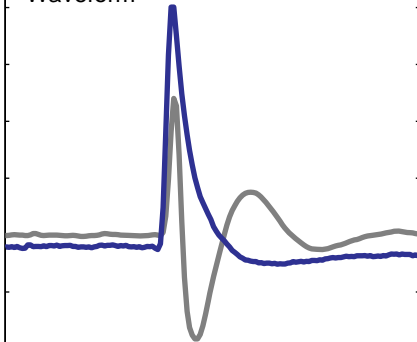

HP/PV

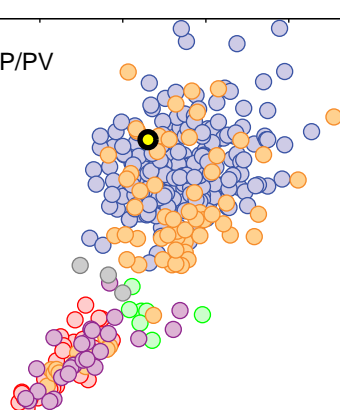

FR/PV

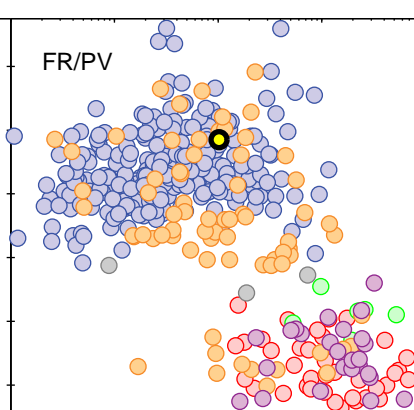

ISI Histogram [97]

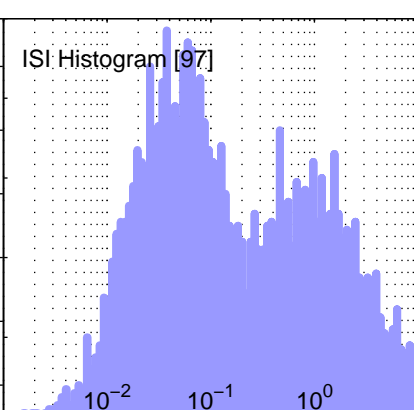20  
40  
60  
80  
100

1 Cue On [114]

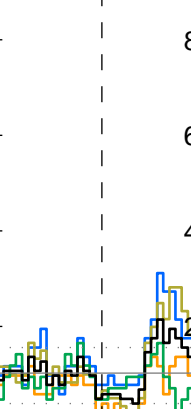

2 Nose In [114]

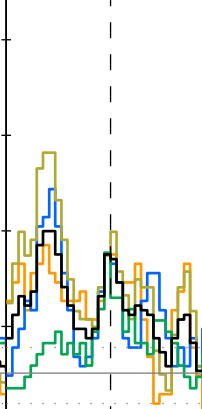

3 Tone [57,57]

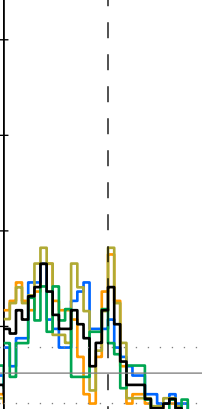

4 Go [114]

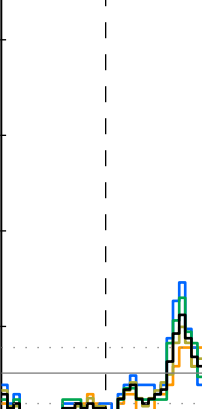

5 Choice [67,47]

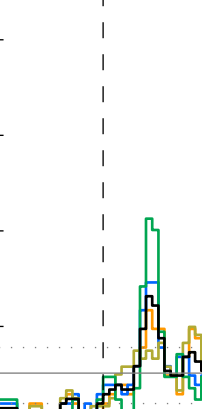

6 Side In [67,47]

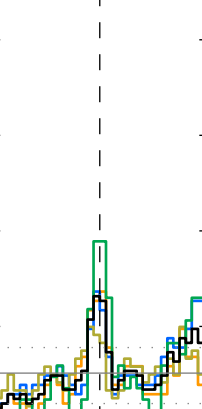

7 Nose Out [67,47]

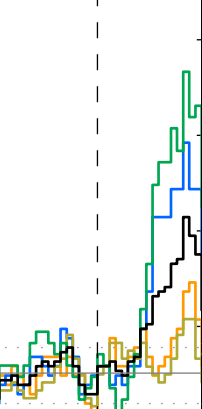

8 Reward [49,39]

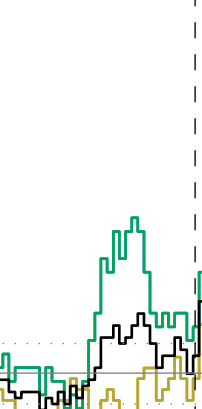

1 Cue On [114]

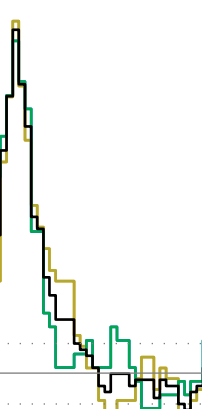

2 Nose In [114]

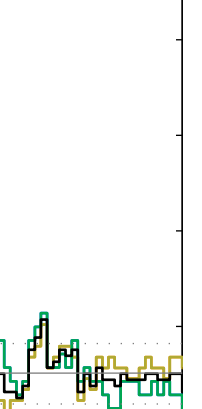

**Cell: C0320070618T06a**

AP: 1.7 ML: 1.3 DV: 6.4

w: 4 n: 3976  $P_{ISI>2}$ : 0.69

1/2pw: 258 $\mu$ s p $\rightarrow$ v: 928 $\mu$ s

$\beta_T$ : NaN  $\beta_D$ : NaN

$\beta_P$ : NaN SI: NaN

Session FR: 0.791 Hz

Pk Ev: 8 - Reward (T2/Ipsi)

Pk FR: 6.21Hz (0.17s) **MSN**

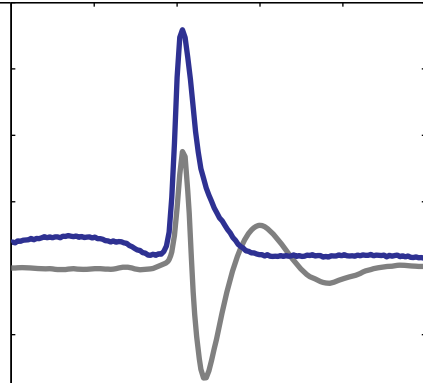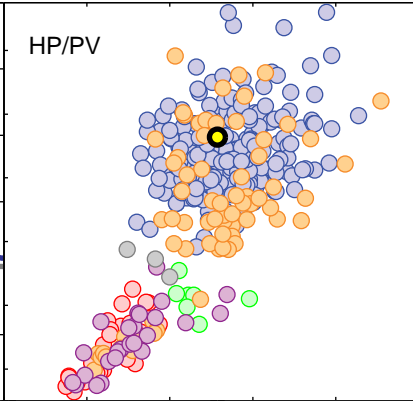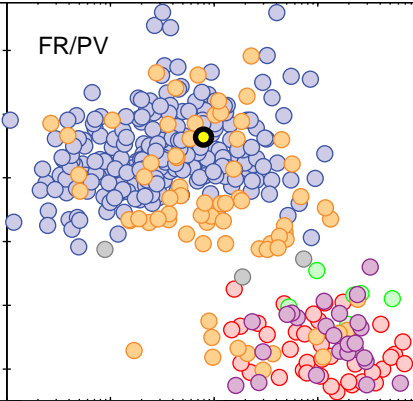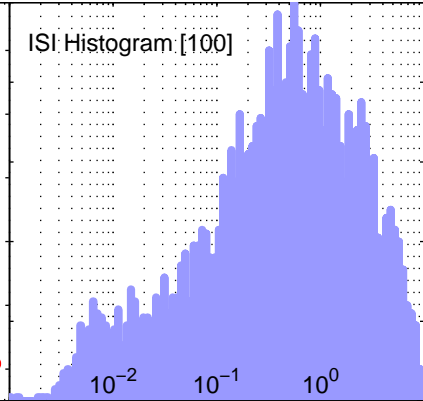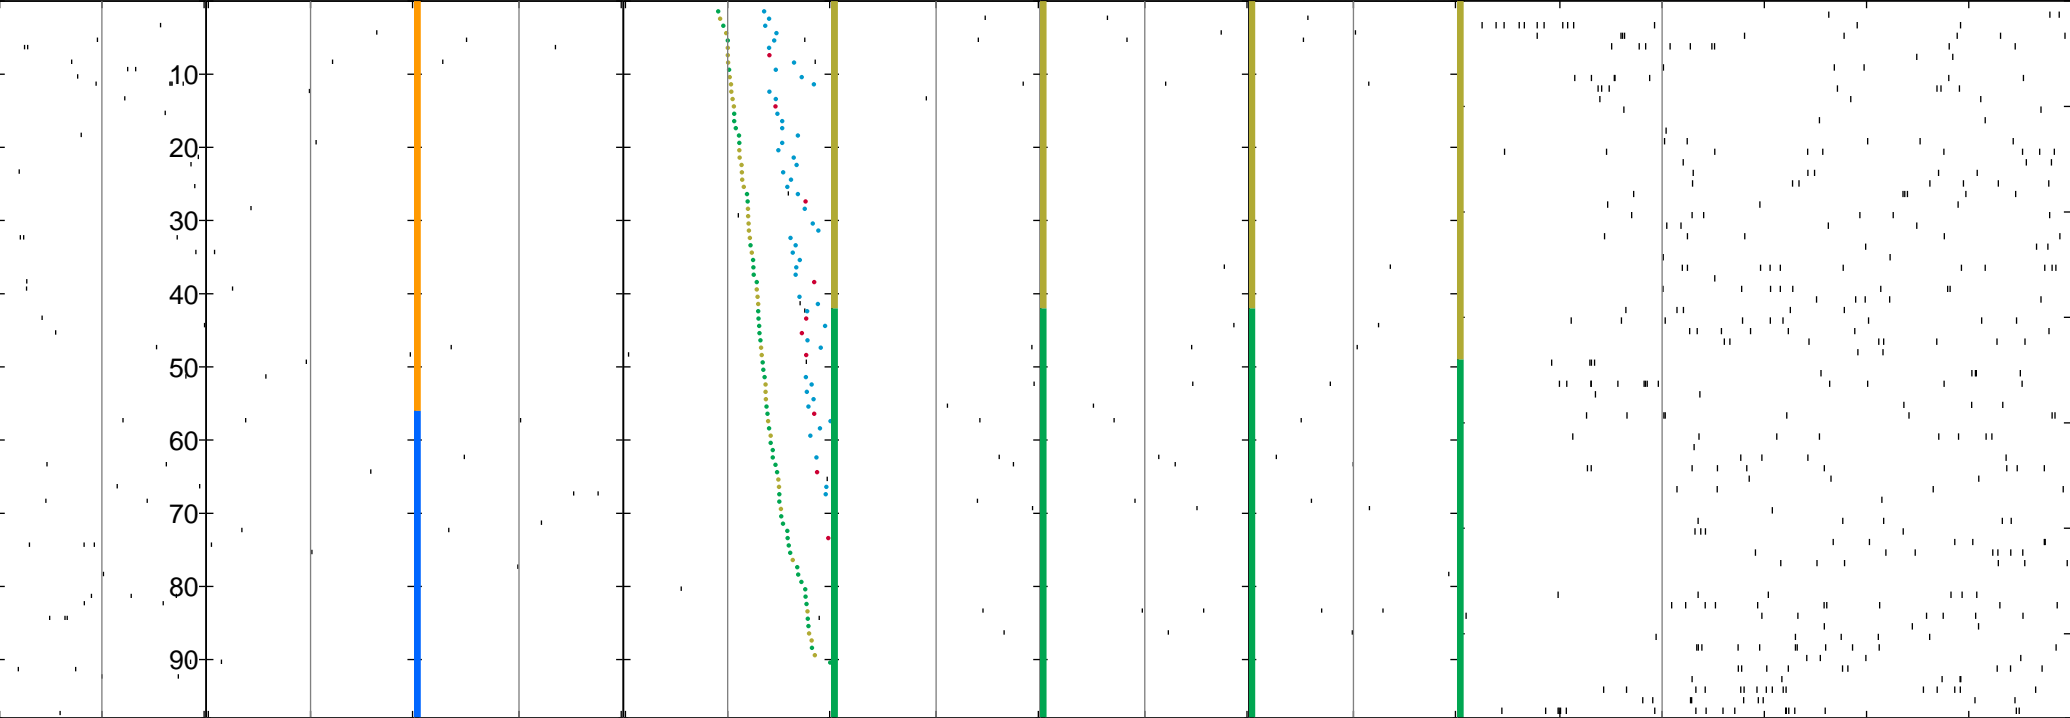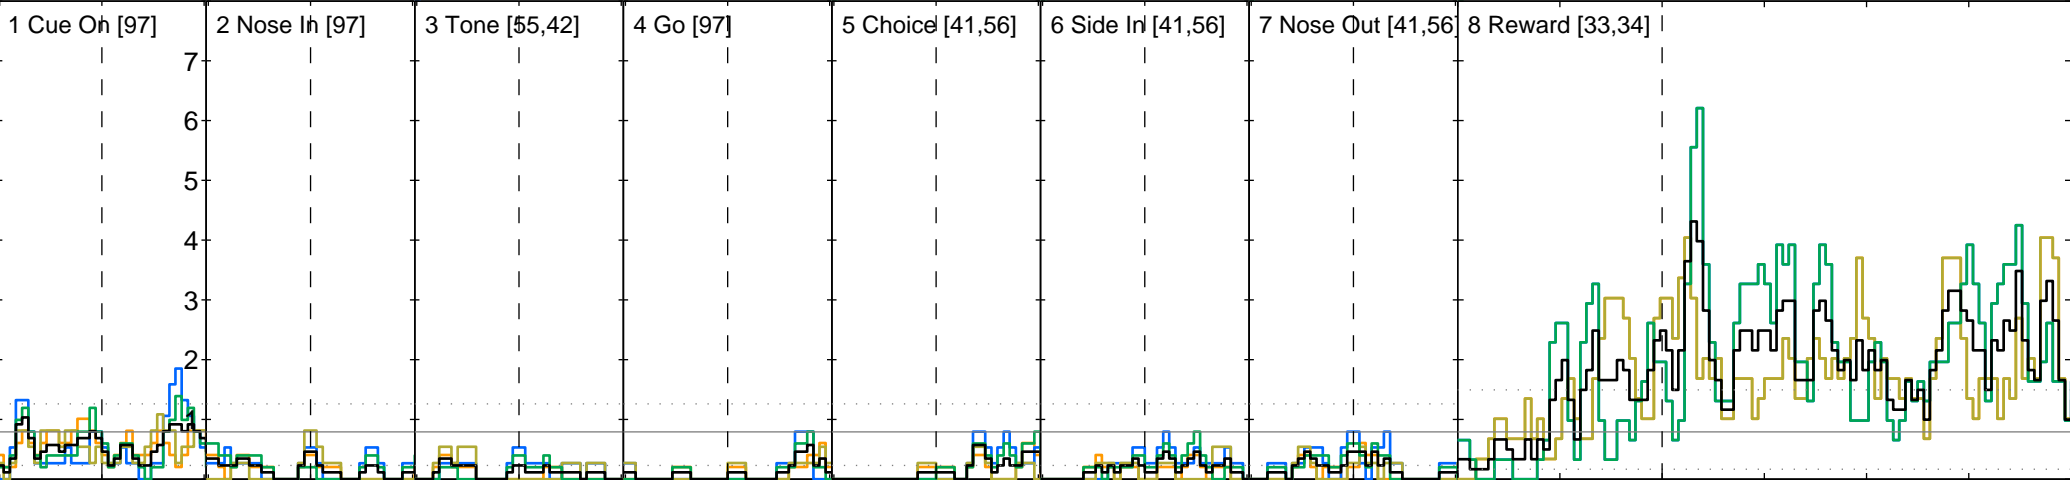

**Cell: C0320070627T09b**

AP: 1.6 ML: 3.7 DV: 5.8  
w: 4 n: 469  $P_{ISI>2}$ : 0.98  
1/2pw: 261 $\mu$ s p->v: 806 $\mu$ s  
 $\beta_T$ : NaN  $\beta_D$ : NaN  
 $\beta_P$ : NaN SI: NaN  
Session FR: 0.138 Hz  
Pk Ev: 8 - Reward (T1/Con)  
Pk FR: 11.6Hz (0.2s) **MSN**

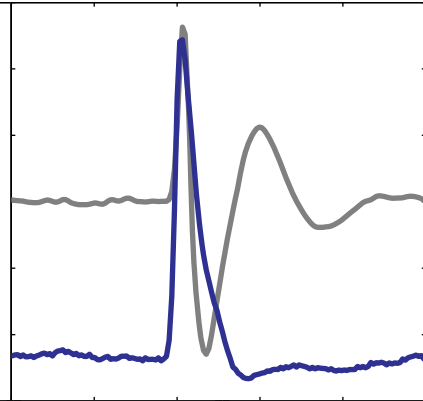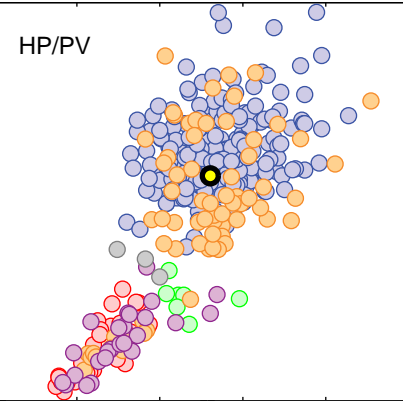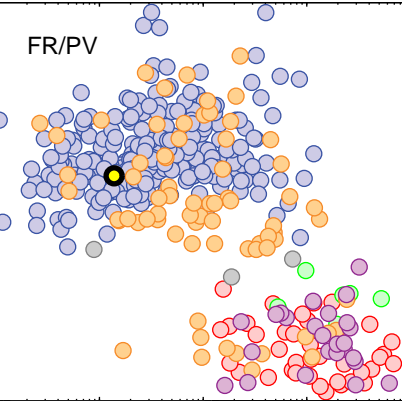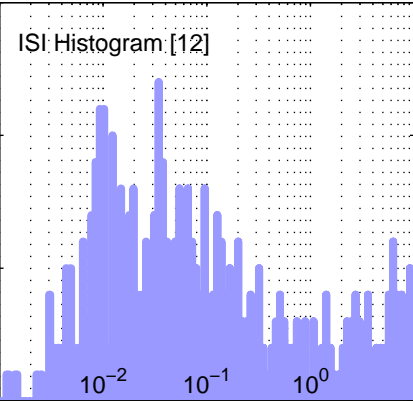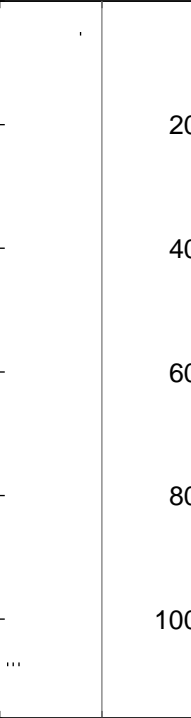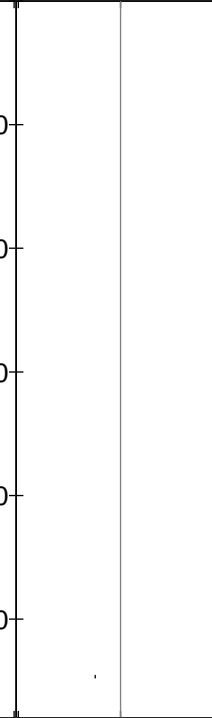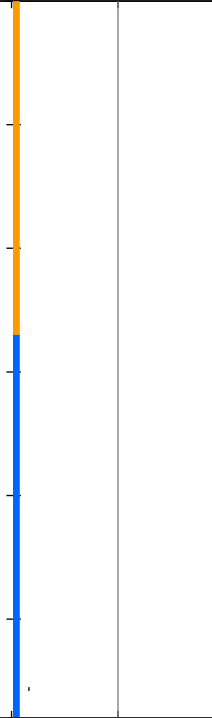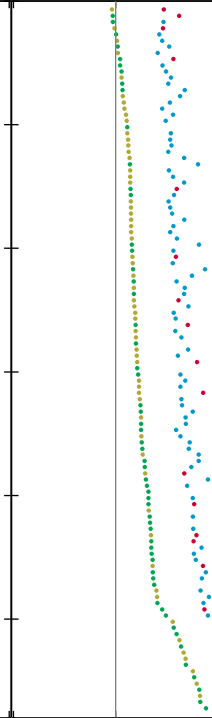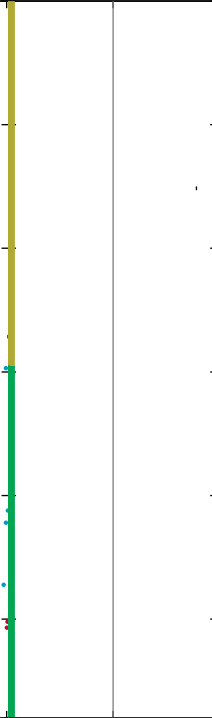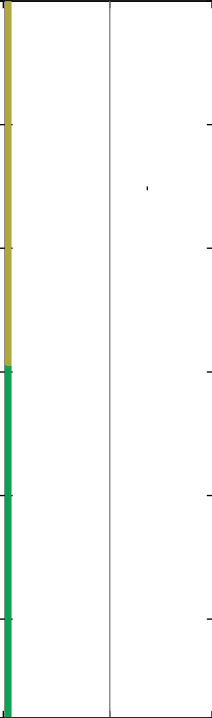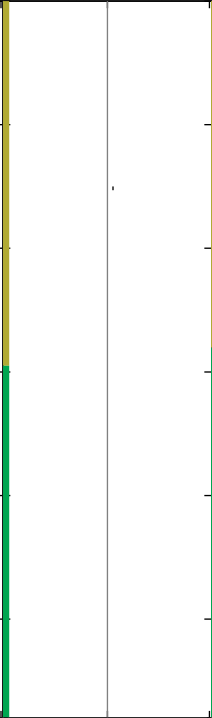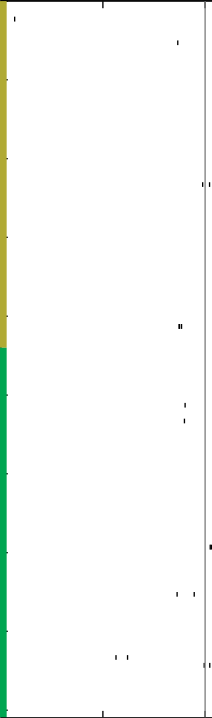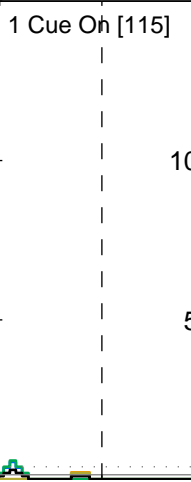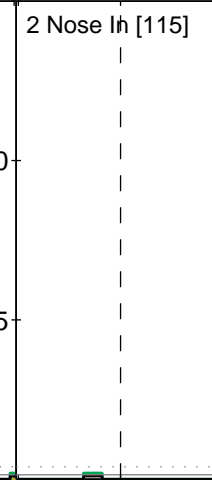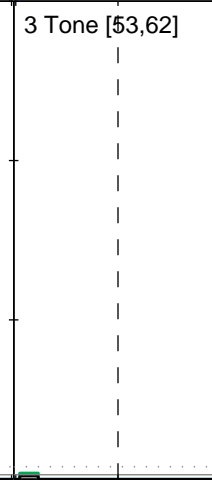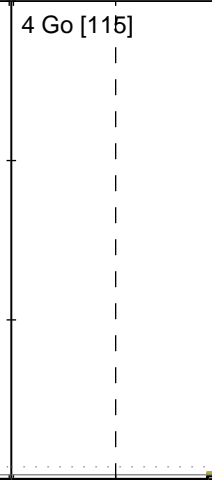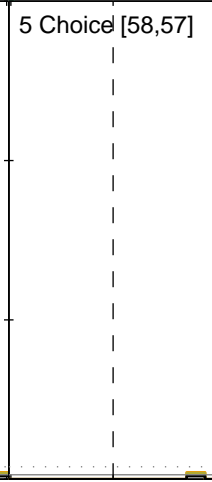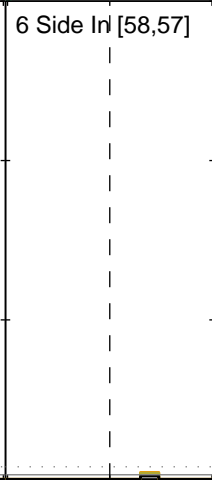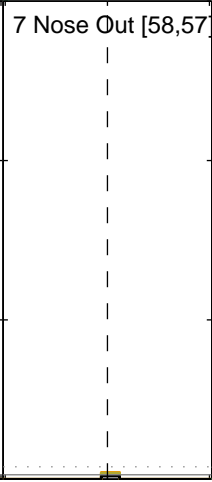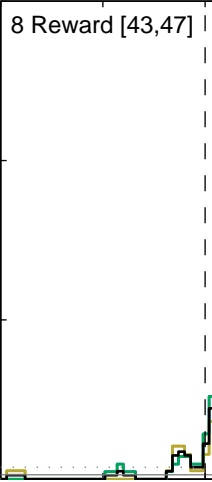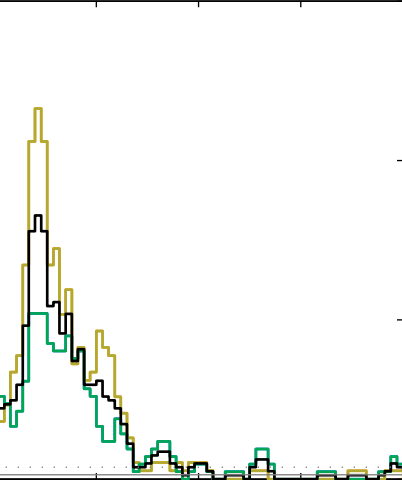

Cell: C0320070630T09k

AP: 1.6 ML: 3.7 DV: 6.2

w: 4 n: 811  $P_{ISI>2}$ : 0.95

1/2pw: 277 $\mu$ s p $\rightarrow$ v: 1279 $\mu$ s

$\beta_T$ : NaN  $\beta_D$ : NaN

$\beta_P$ : NaN SI: NaN

Session FR: 0.267 Hz

Pk Ev: 8 - Reward (T2/Ipsi)

Pk FR: 8.89Hz (0.2s) **MSN**

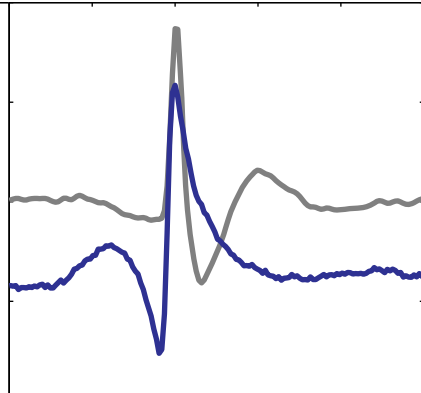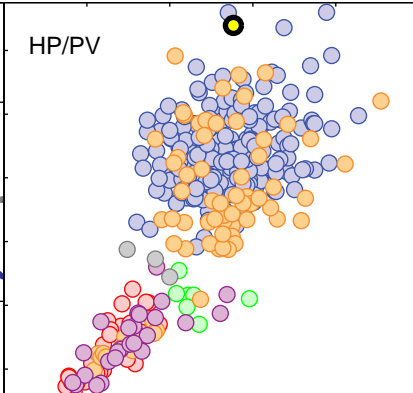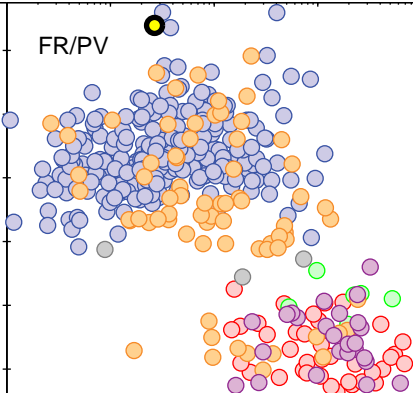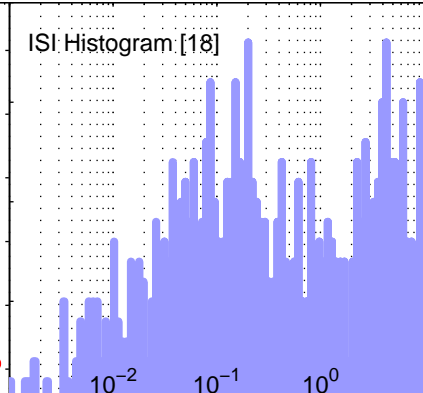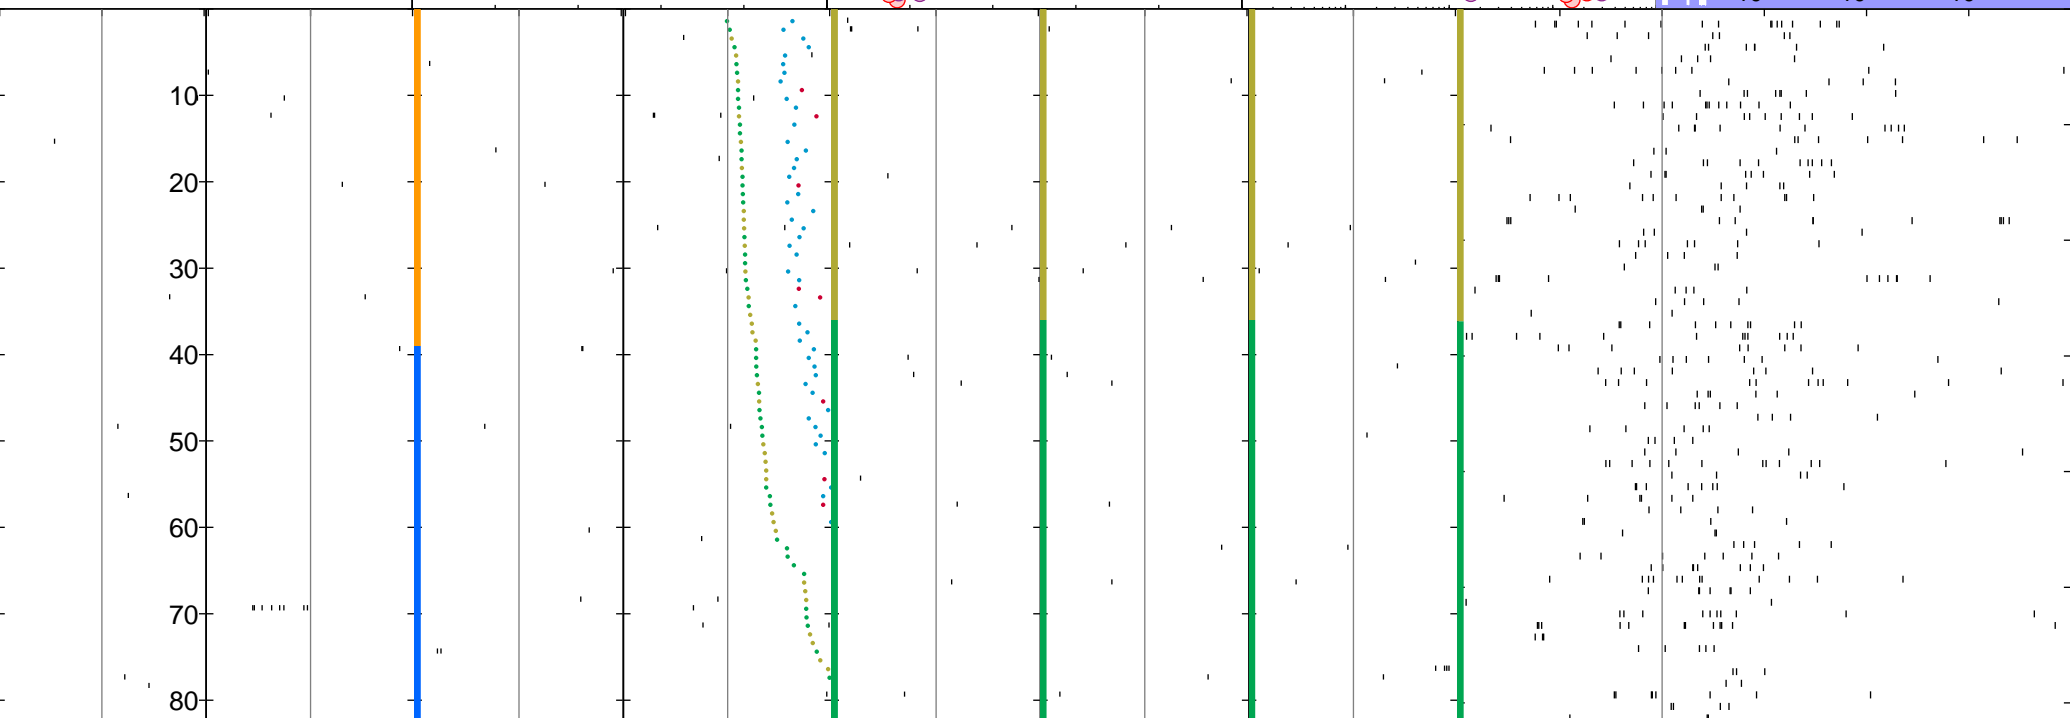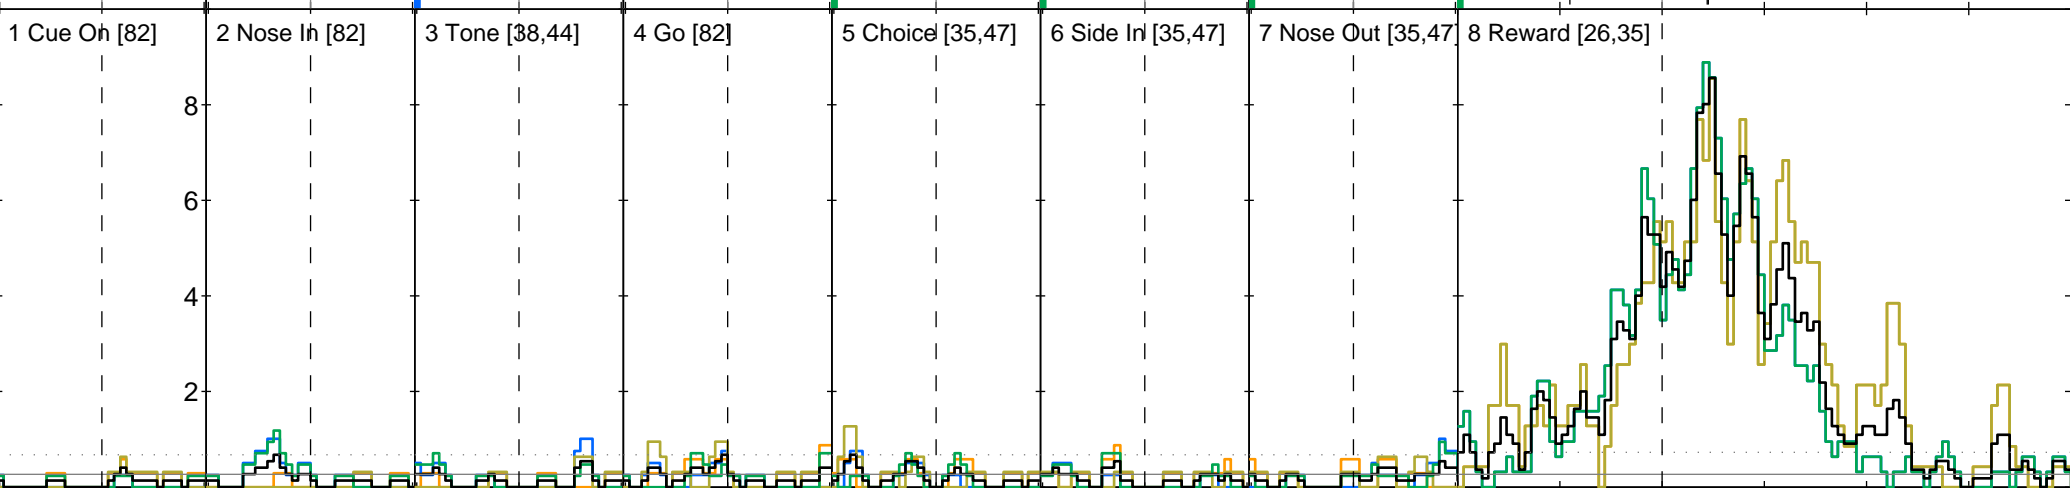



**Cell: C0520070416T05a**

AP: 2.2 ML: 1.2 DV: 8.2

w: 4 n: 6185  $P_{ISI>2}$ : 0.66

1/2pw: 242 $\mu$ s p $\rightarrow$ v: 832 $\mu$ s

$\beta_T$ : NaN  $\beta_D$ : NaN

$\beta_P$ : NaN SI: NaN

Session FR: 1.39 Hz

Pk Ev: 8 - Reward (T1/Con)

Pk FR: 6.8Hz (0.2s) **MSN**

Waveform

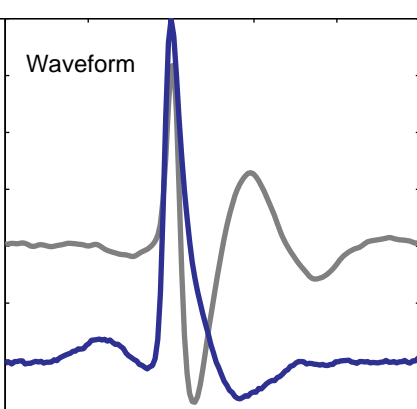

HP/PV

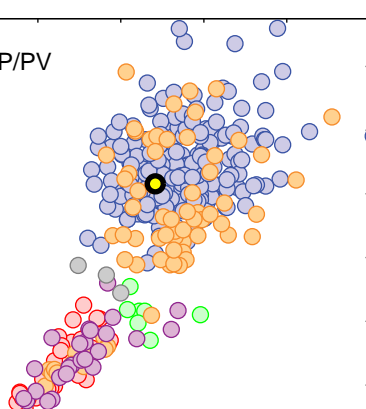

FR/PV

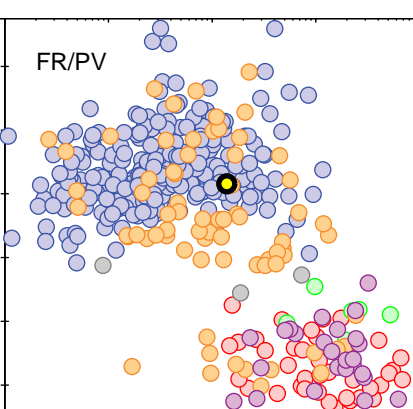

ISI Histogram [143]

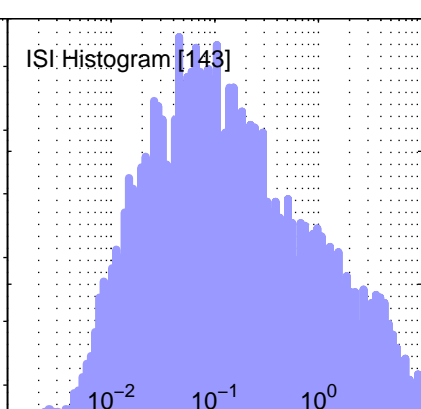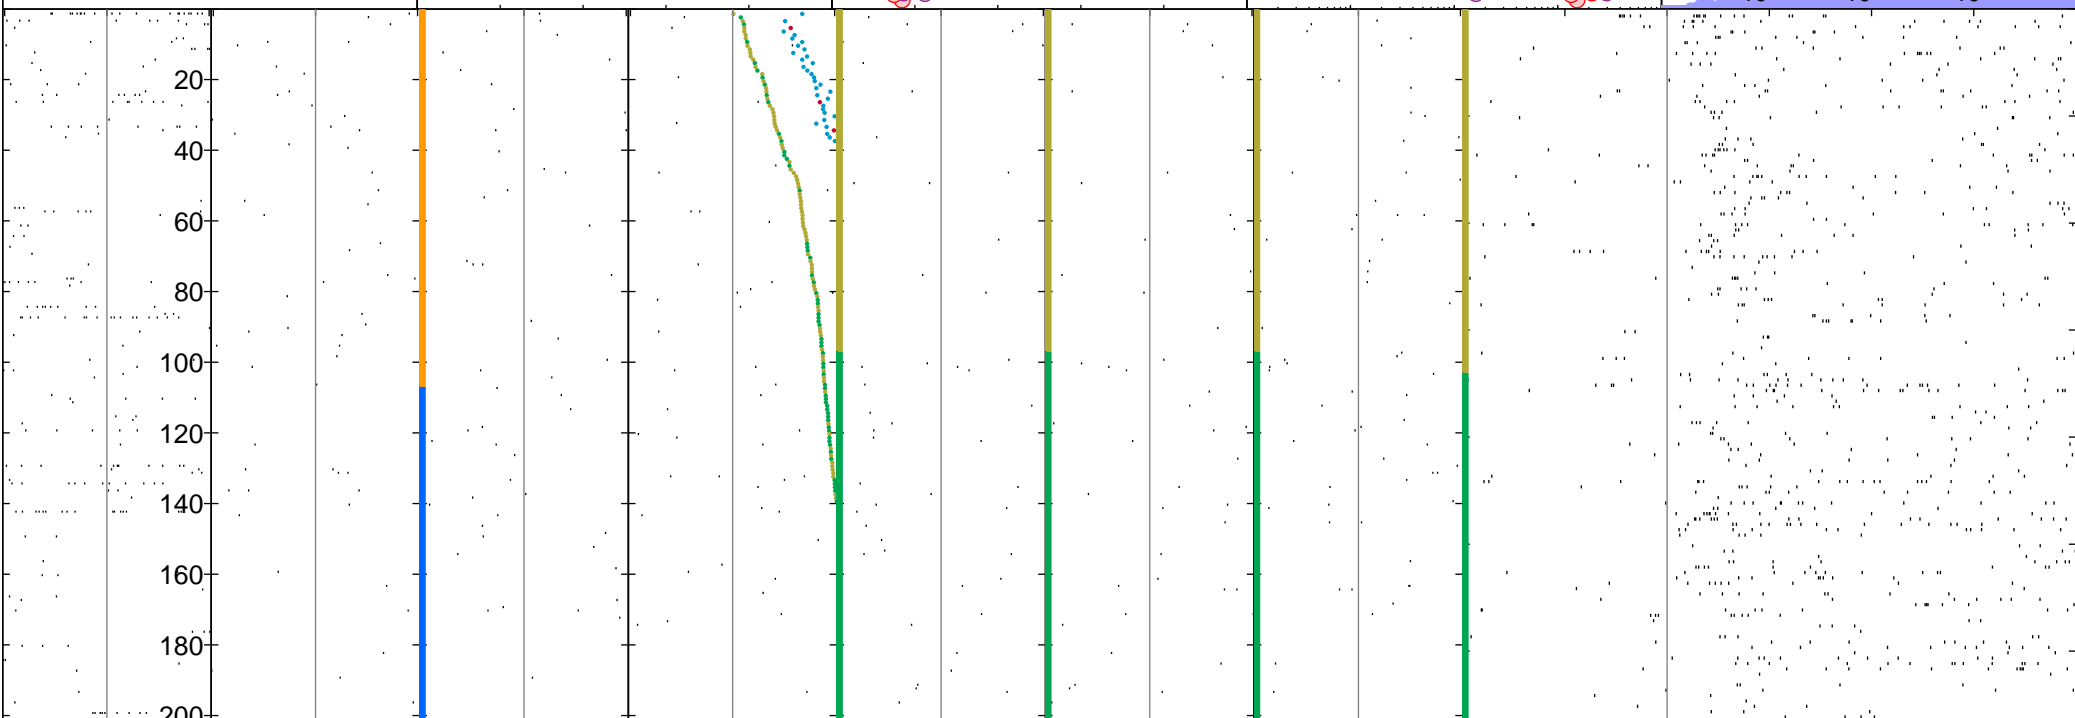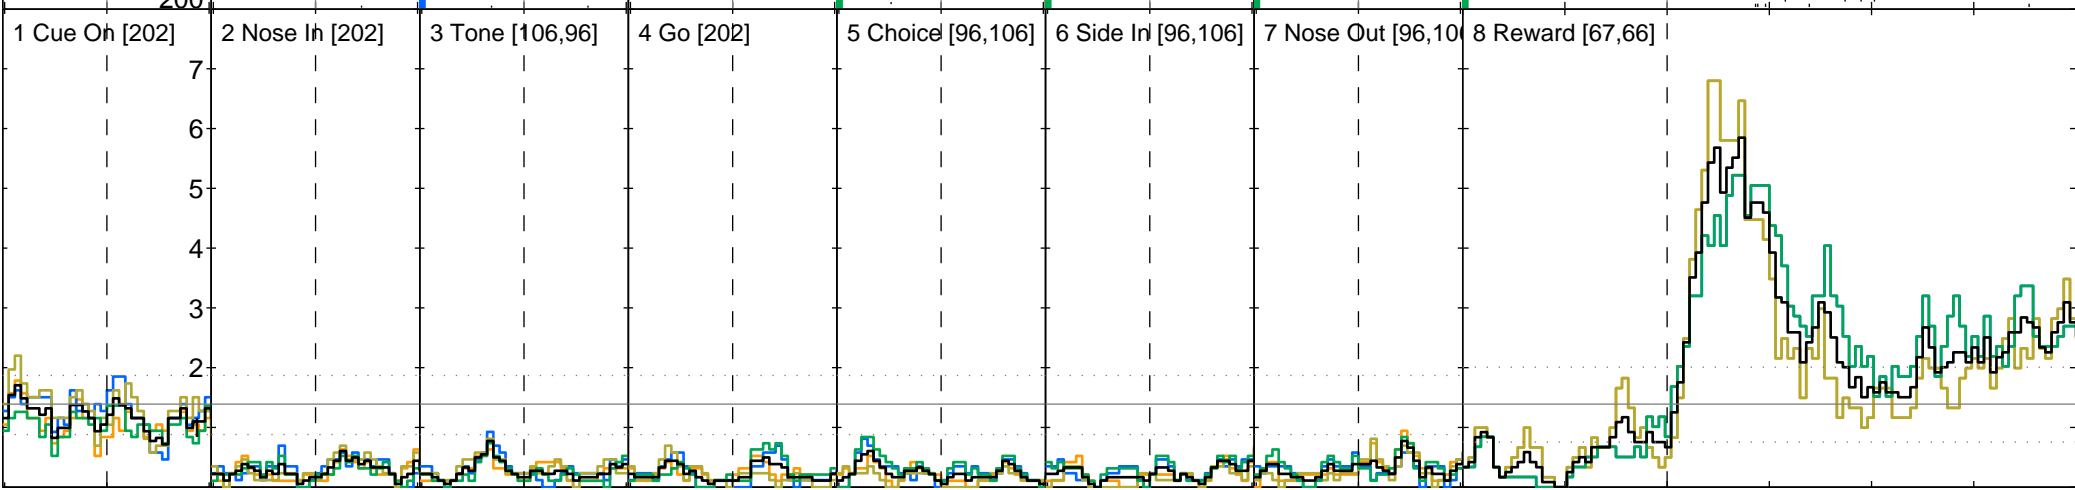

**Cell: C0320070623T09c**

AP: 1.6 ML: 3.7 DV: 5.3  
w: 1 n: 1038  $P_{ISI>2}$ : 0.96  
1/2pw: 222 $\mu$ s p->v: 856 $\mu$ s  
 $\beta_T$ : NaN  $\beta_D$ : NaN  
 $\beta_P$ : NaN SI: NaN  
Session FR: 0.273 Hz  
Pk Ev: 8 - Reward (T2/Ipsi)  
Pk FR: 11.4Hz (0.23s) **MSN**

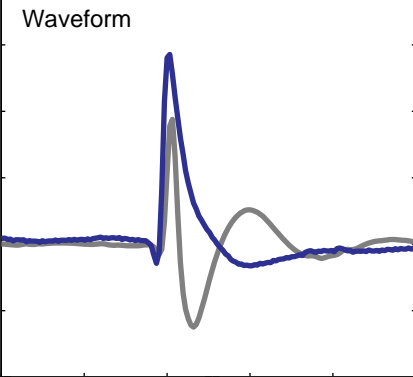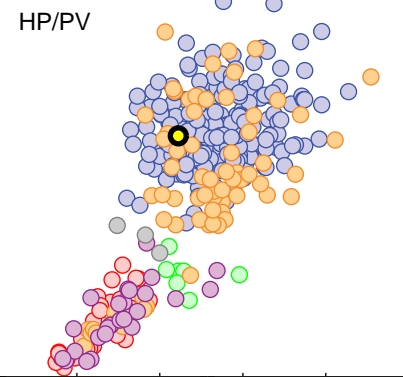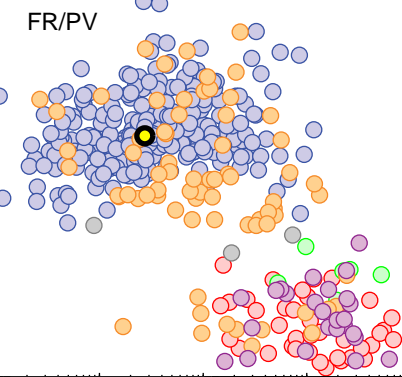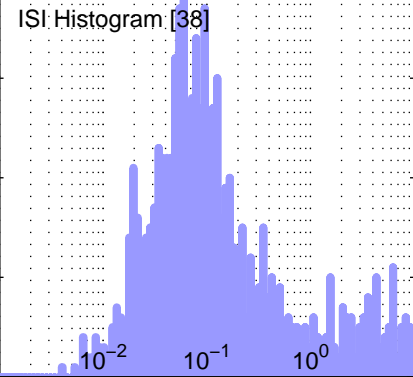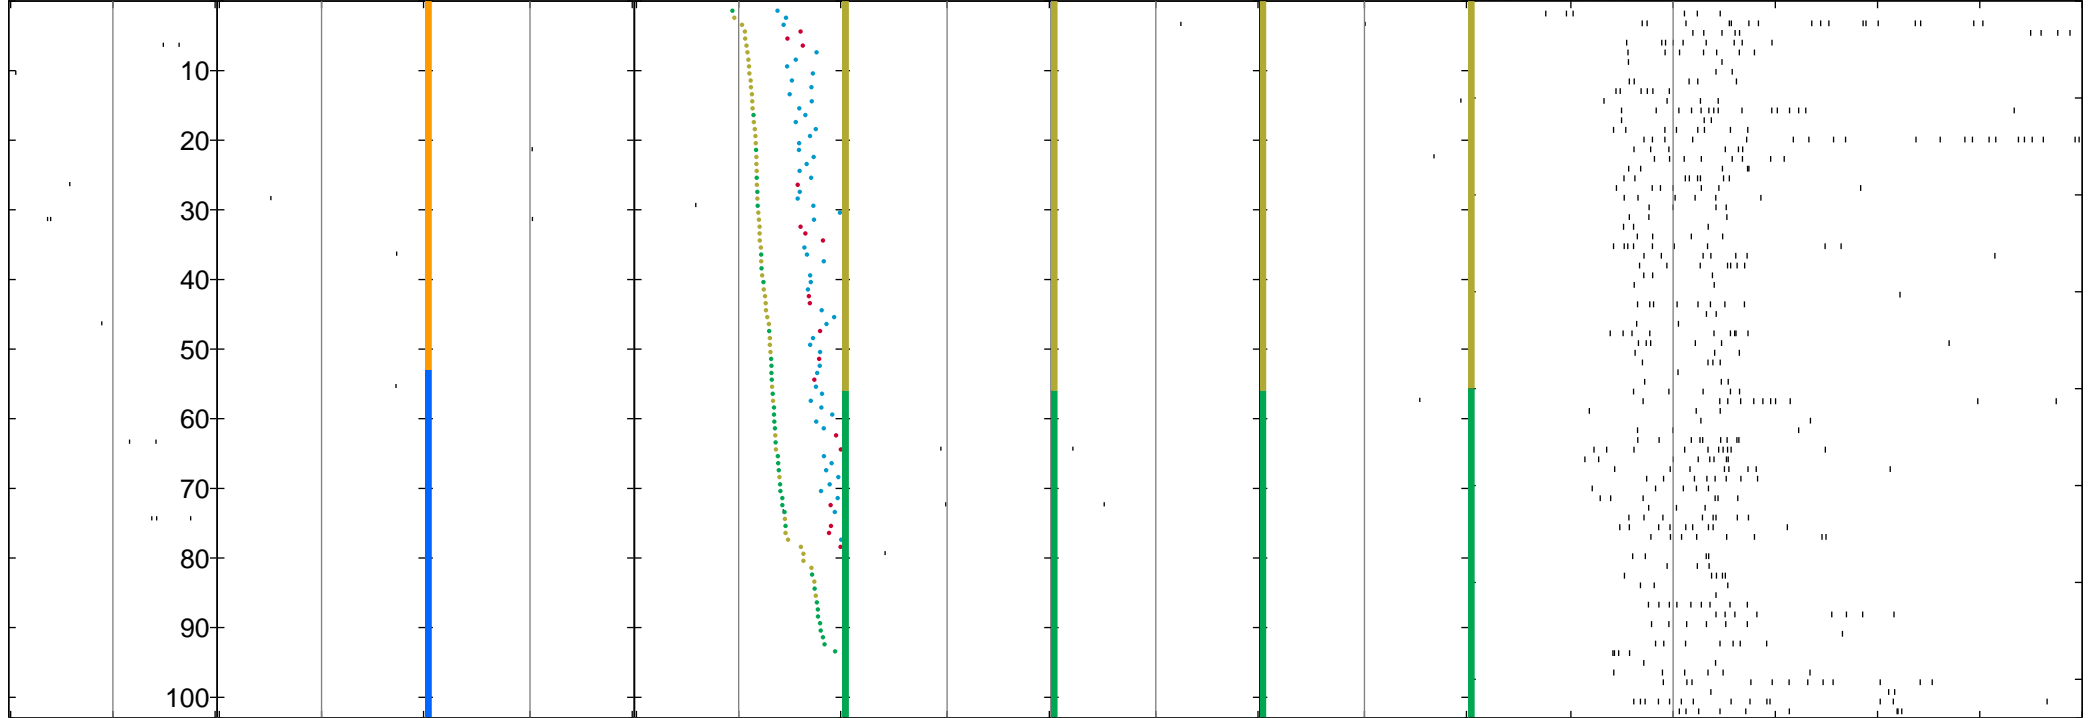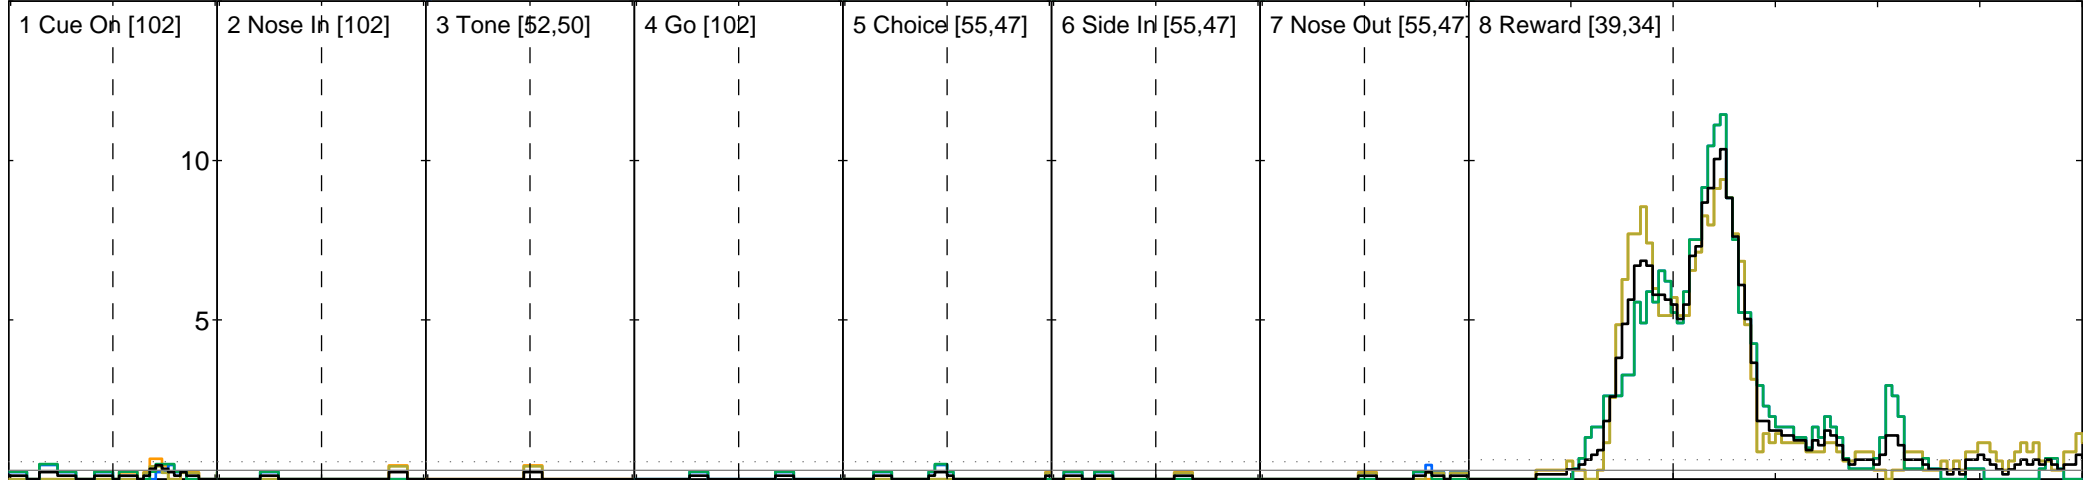

**Cell: C0320070623T09i**

AP: 1.6 ML: 3.7 DV: 5.3  
w: 4 n: 632  $P_{ISI>2}$ : 0.97  
1/2pw: 194 $\mu$ s p->v: 752 $\mu$ s  
 $\beta_T$ : NaN  $\beta_D$ : NaN  
 $\beta_P$ : NaN SI: NaN  
Session FR: 0.169 Hz  
Pk Ev: 8 - Reward (T1/Con)  
Pk FR: 9.4Hz (0.23s) **MSN**

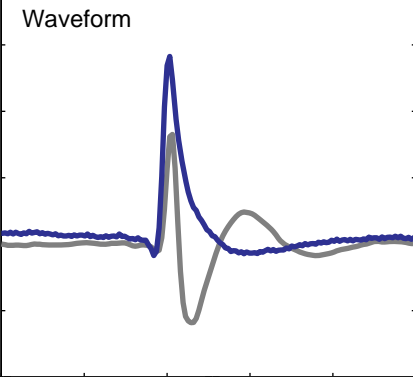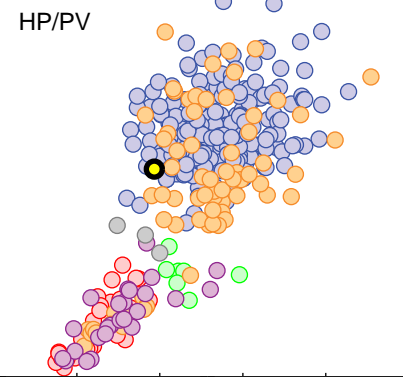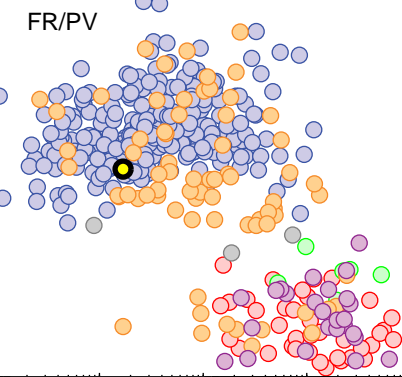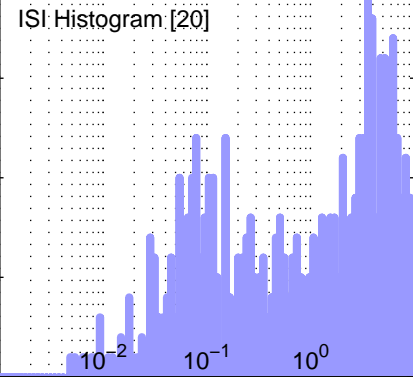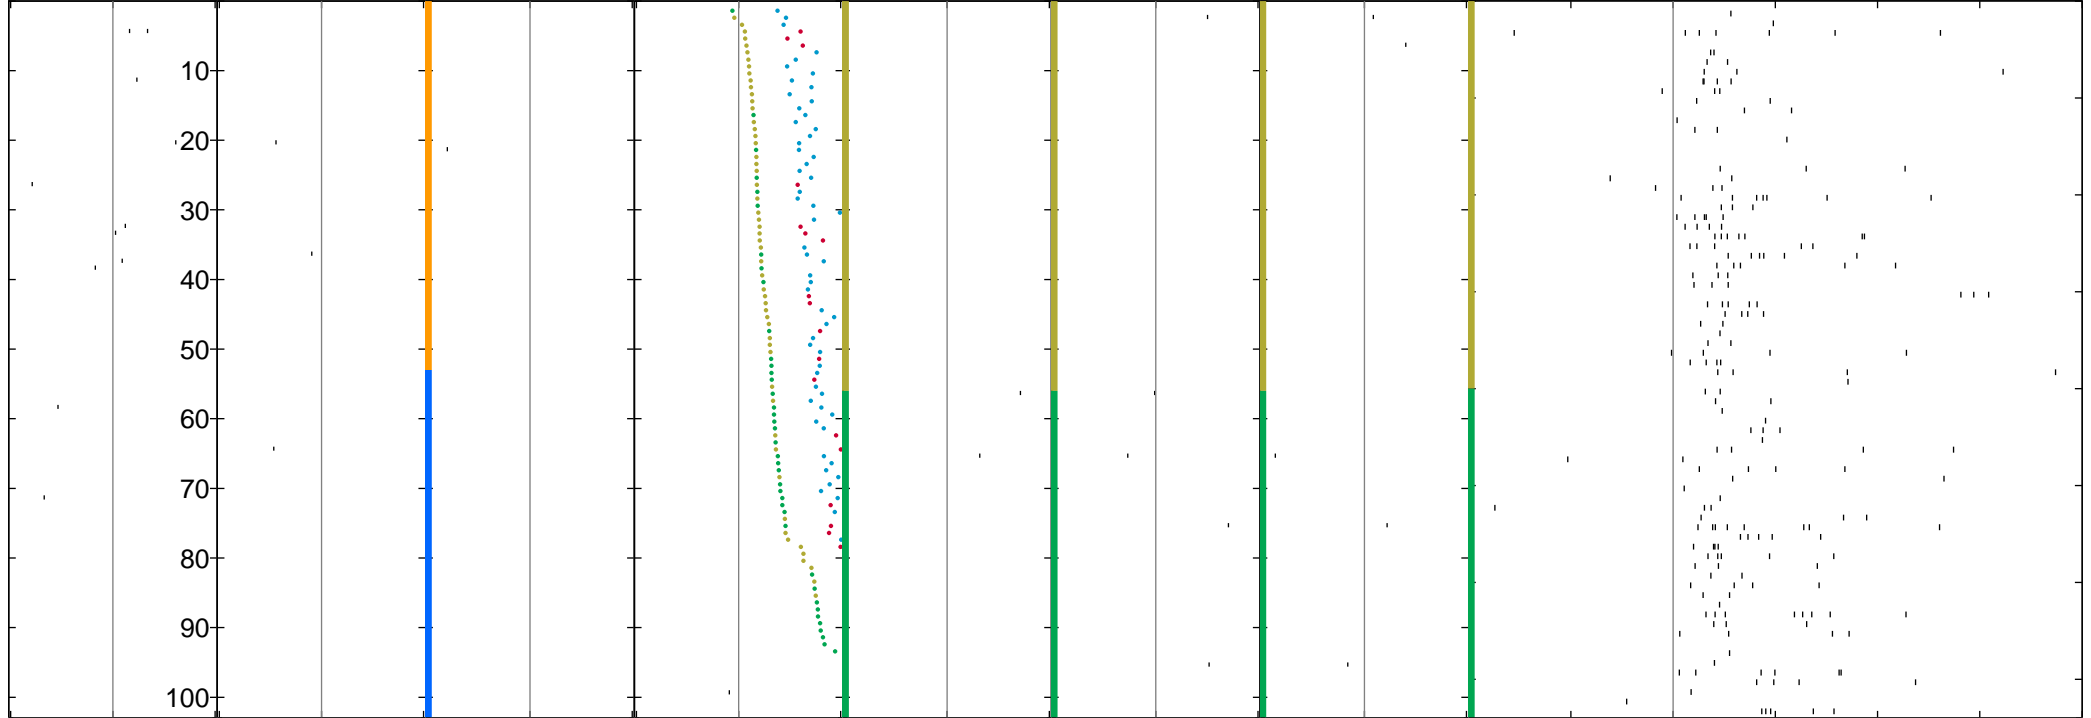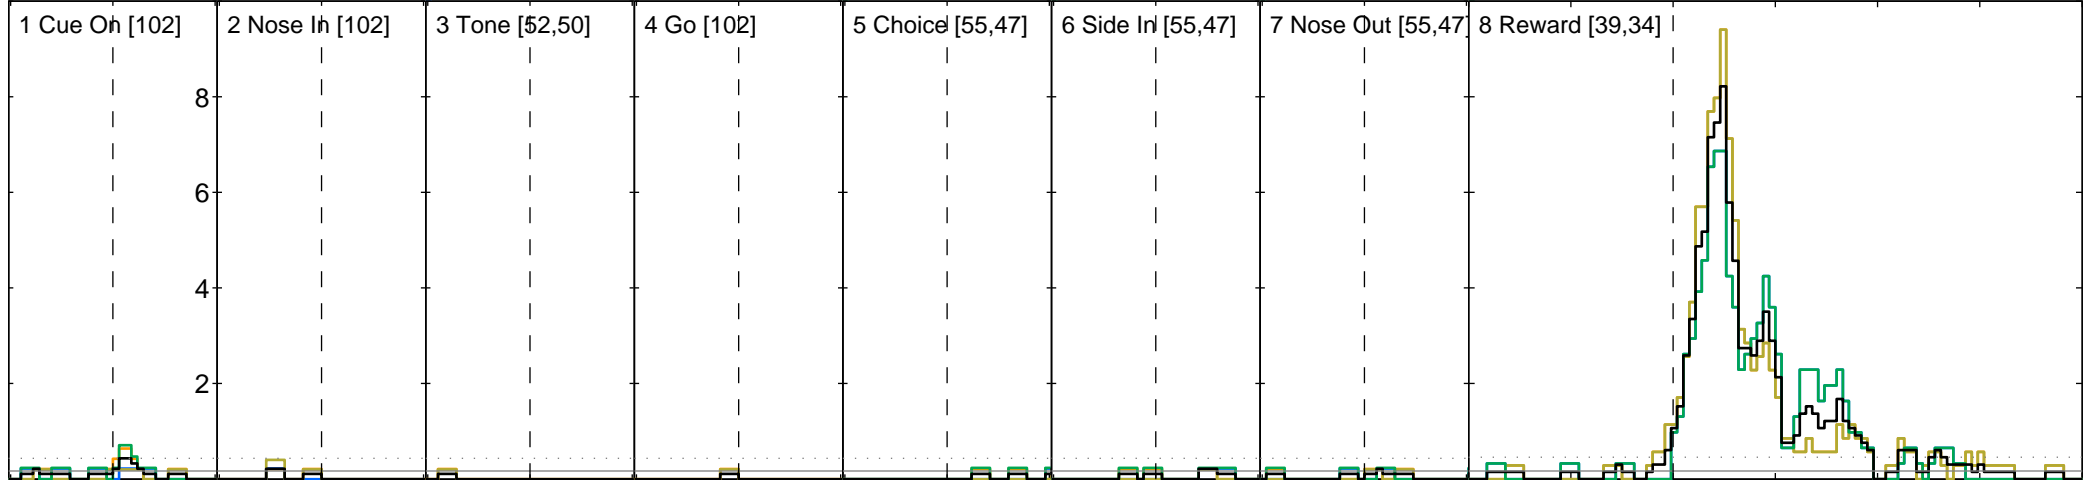

Cell: C0320070623T11a

AP: -0.96 ML: 3.7 DV: 5.9

w: 1 n: 4254  $P_{ISI>2}$ : 0.39

1/2pw: 291 $\mu$ s p->v: 709 $\mu$ s

$\beta_T$ : NaN  $\beta_D$ : NaN

$\beta_P$ : NaN SI: NaN

Session FR: 1.12 Hz

Pk Ev: 8 - Reward (T2/Ipsi)

Pk FR: 5.23Hz (0.23s) **MSN**

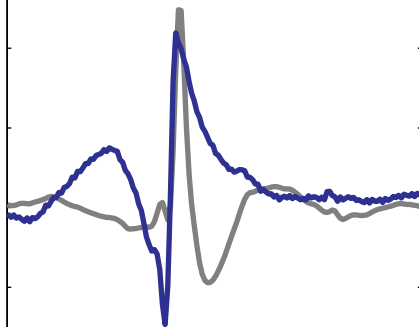

HP/PV

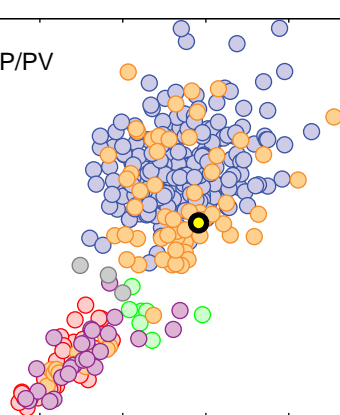

FR/PV

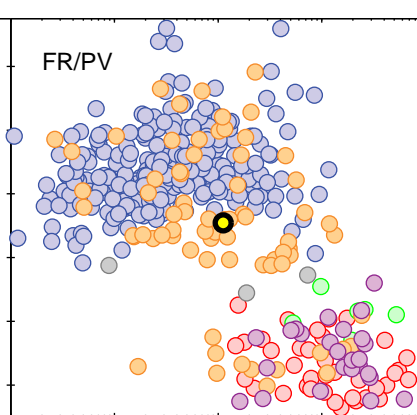

ISI Histogram [157]

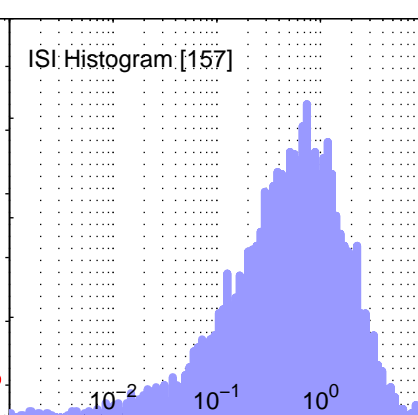

10  
20  
30  
40  
50  
60  
70  
80  
90  
100

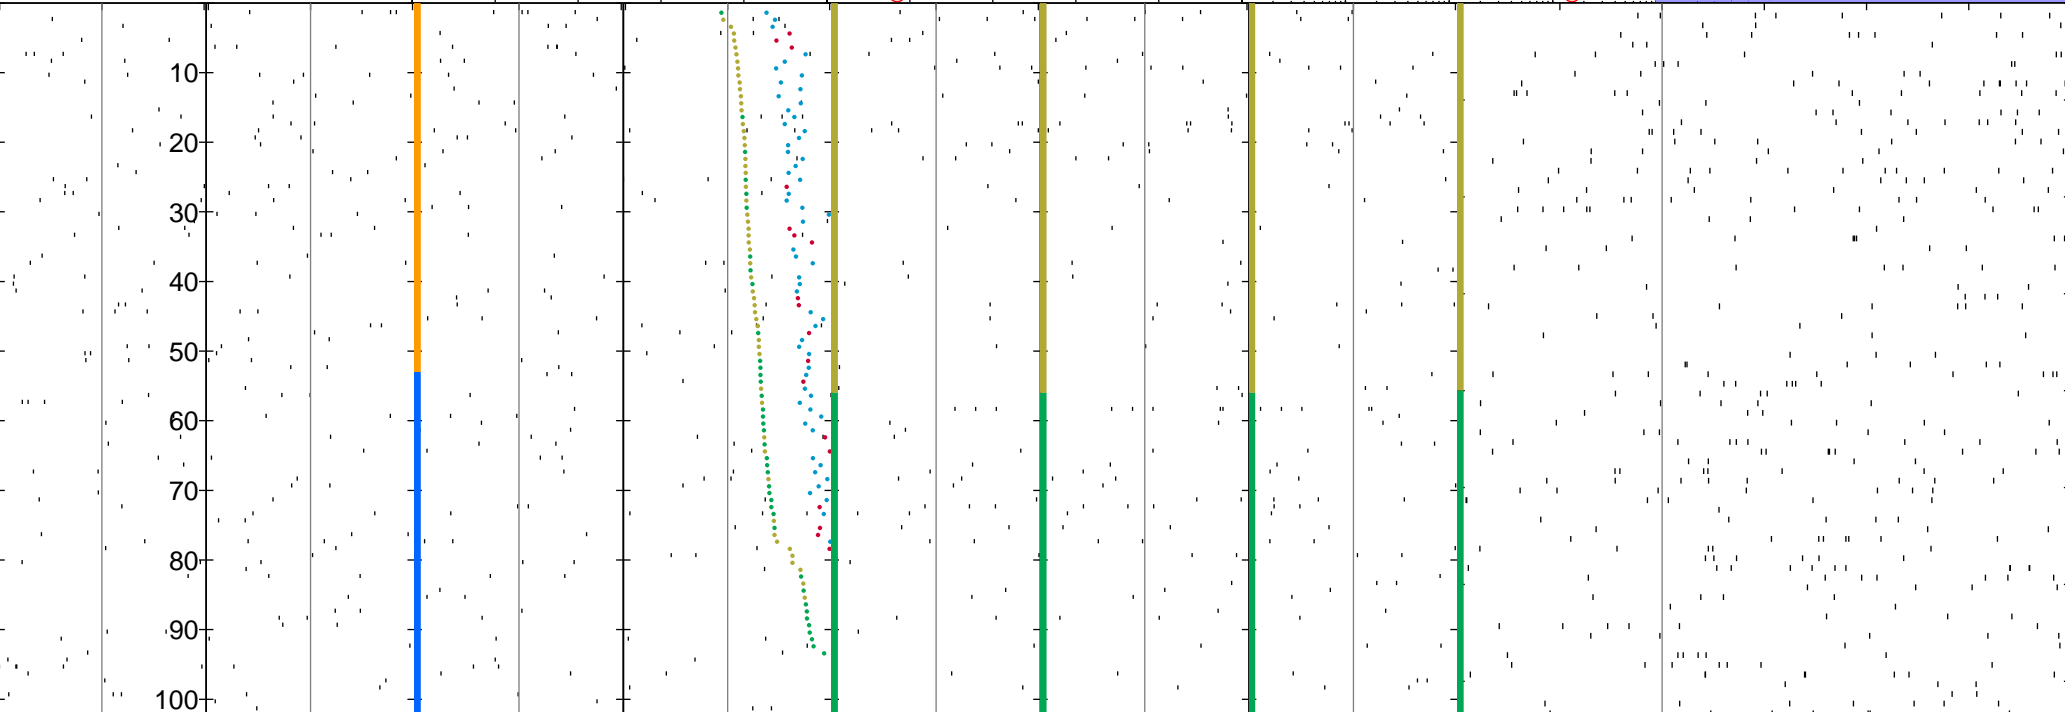

1 Cue On [102]

2 Nose In [102]

3 Tone [52,50]

4 Go [102]

5 Choice [55,47]

6 Side In [55,47]

7 Nose Out [55,47]

8 Reward [39,34]

5  
4  
3  
2

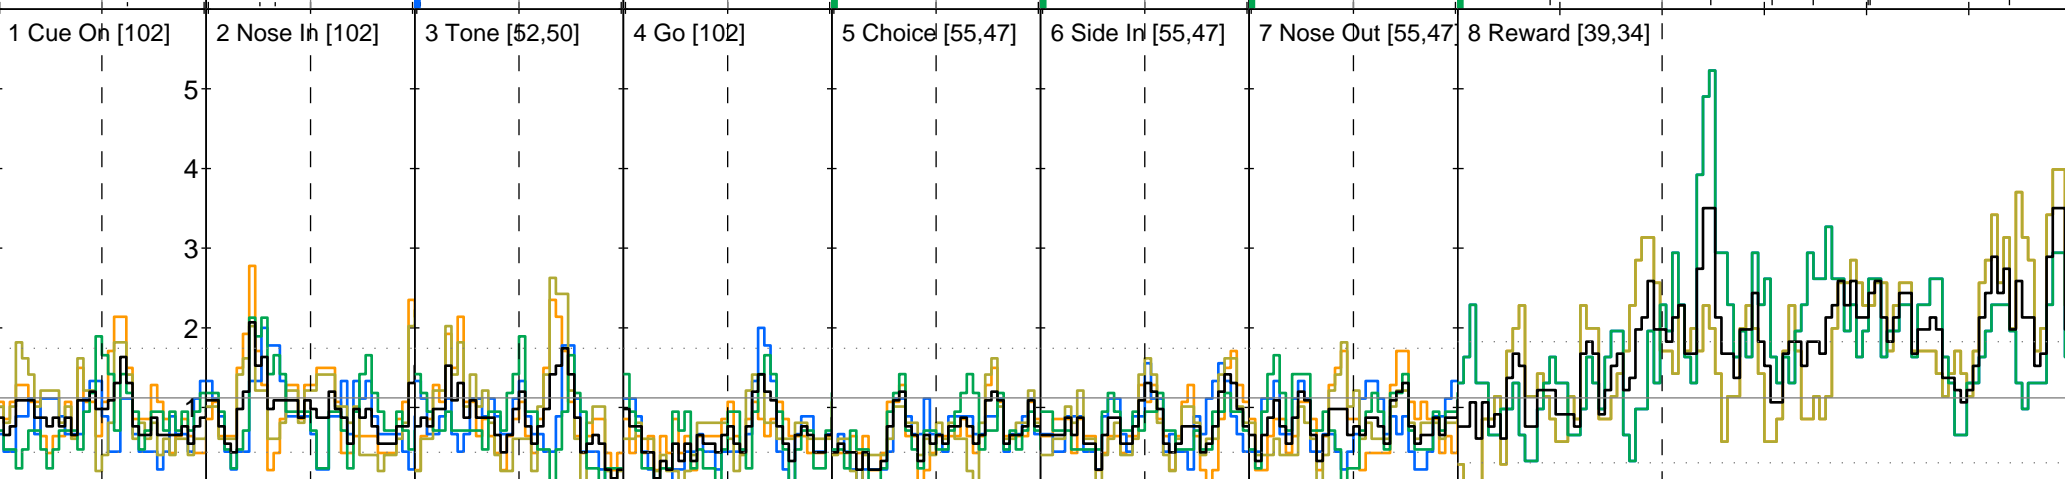

Cell: C0320070619T09b

AP: 1.6 ML: 3.7 DV: 5

w: 1 n: 2632  $P_{ISI>2}$ : 0.91

1/2pw: 259 $\mu$ s p->v: 834 $\mu$ s

$\beta_T$ : NaN  $\beta_D$ : NaN

$\beta_P$ : NaN SI: NaN

Session FR: 0.626 Hz

Pk Ev: 8 - Reward (T1/Con)

Pk FR: 15Hz (0.29s) **MSN**

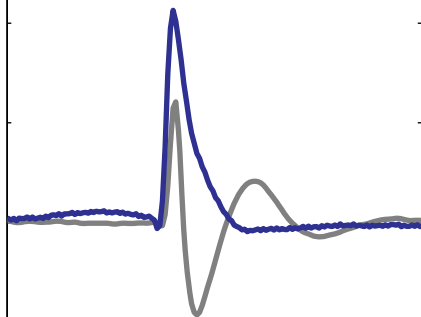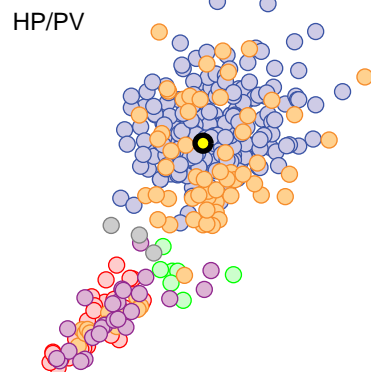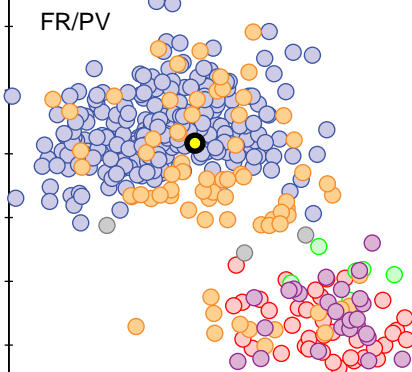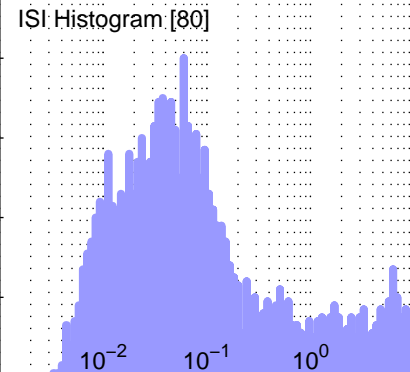

10  
20  
30  
40  
50  
60  
70  
80  
90

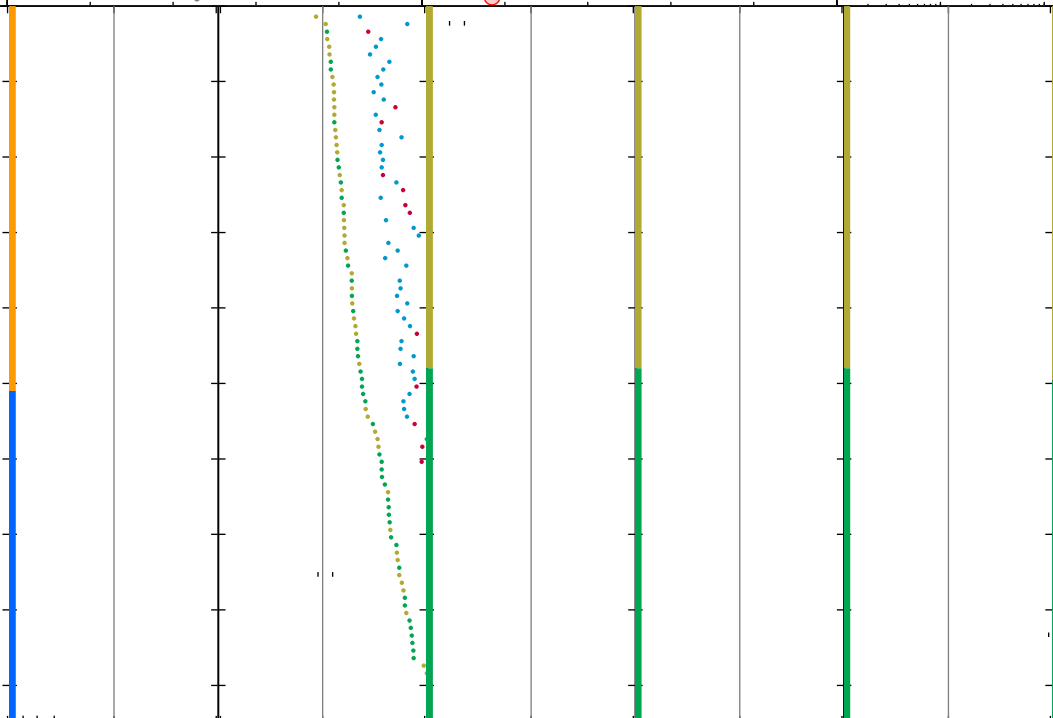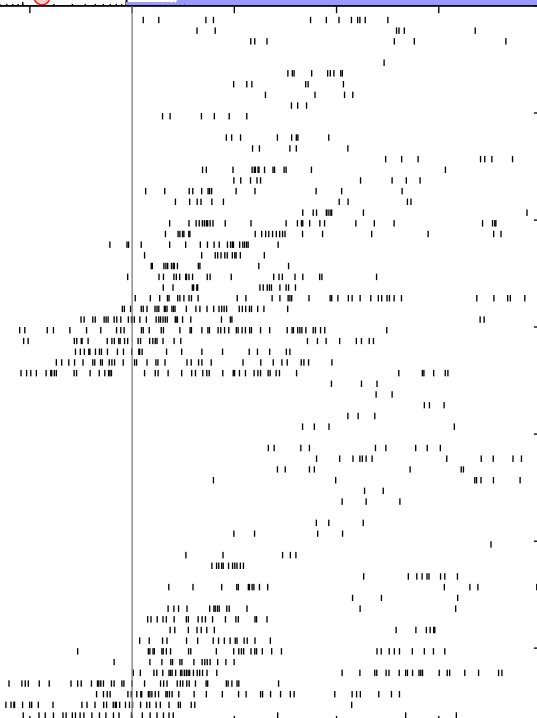

1 Cue On [94] 2 Nose In [94] 3 Tone [50,44] 4 Go [94] 5 Choice [47,47] 6 Side In [47,47] 7 Nose Out [47,47] 8 Reward [34,32]

15  
10  
5

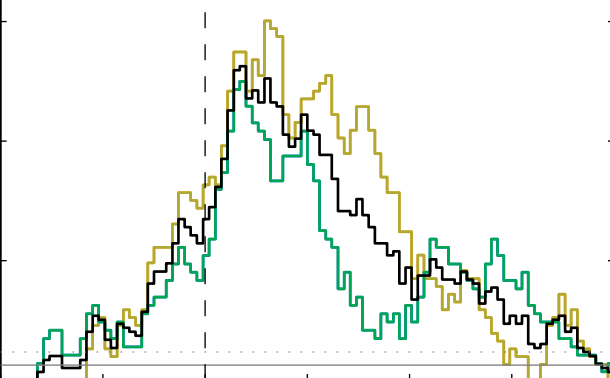

**Cell: C0320070619T09e**

AP: 1.6 ML: 3.7 DV: 5  
w: 2 n: 5446  $P_{ISI>2}$ : 0.65  
1/2pw: 309 $\mu$ s p $\rightarrow$ v: 805 $\mu$ s  
 $\beta_T$ : -1.7  $\beta_D$ : 4.3  
 $\beta_P$ : -2.9 SI: 0.71  
Session FR: 1.28 Hz  
Pk Ev: 8 - Reward (T1/Con)  
Pk FR: 8.5Hz (0.29s) **MSN**

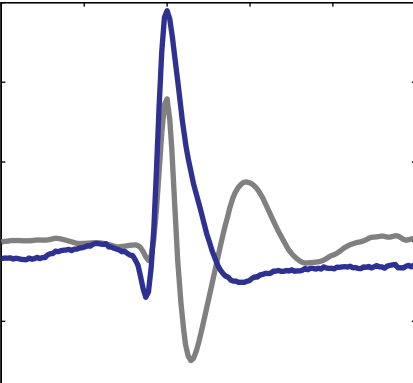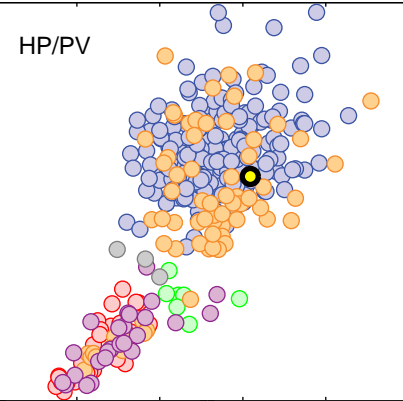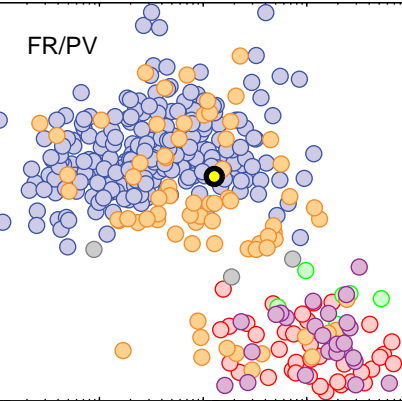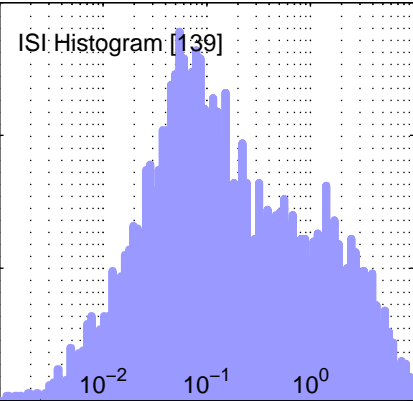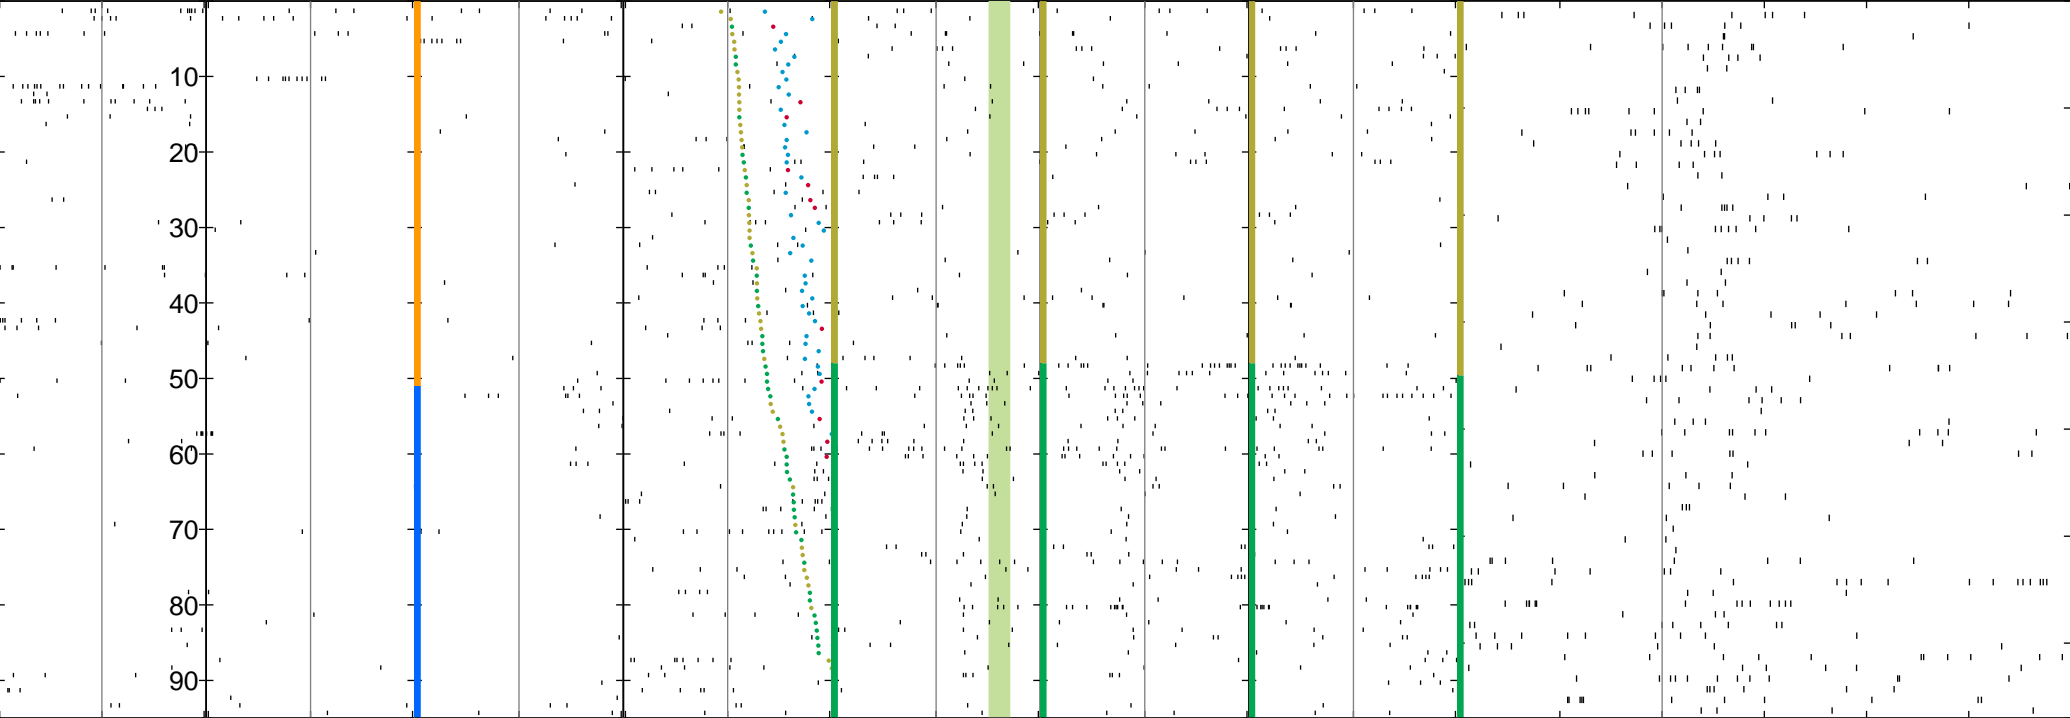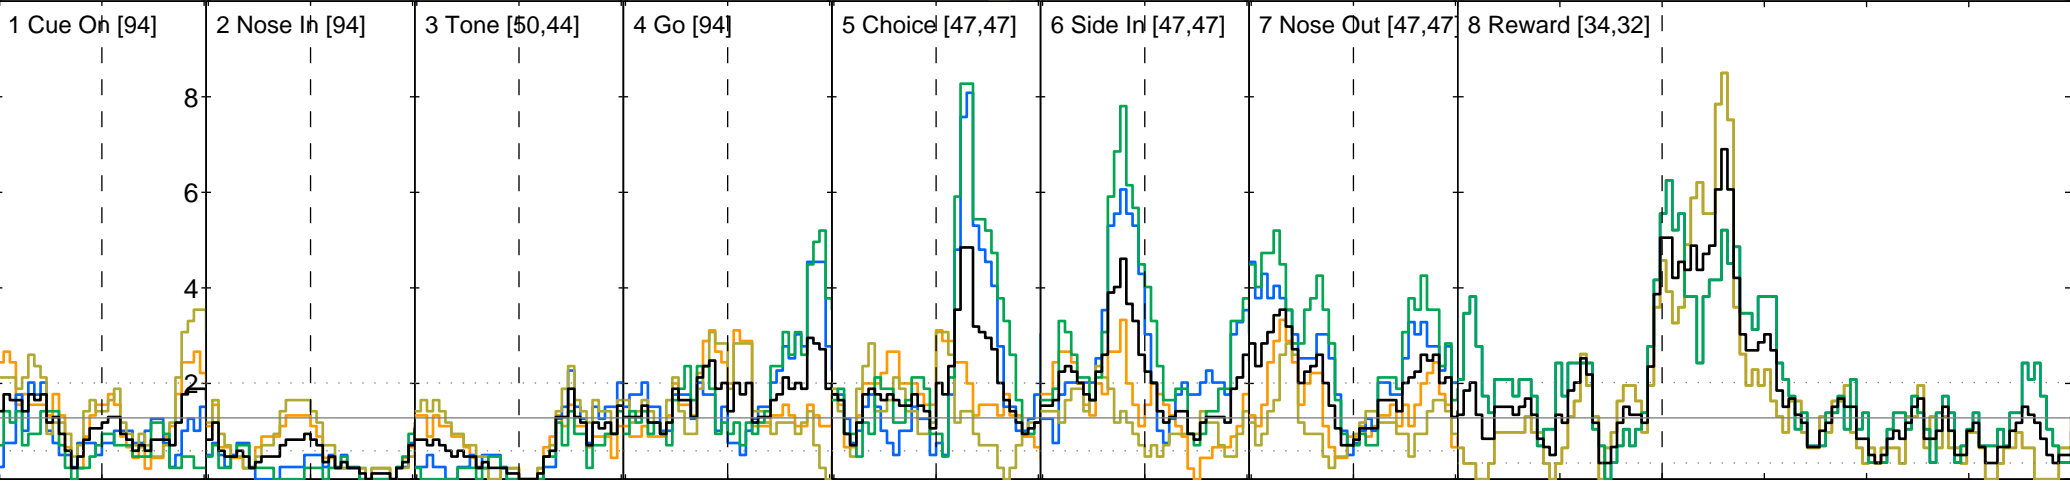

Cell: C0520070417T07b

AP: 1.3 ML: 3.4 DV: 4.5

w: 2 n: 775  $P_{ISI>2}$ : 0.95

1/2pw: 254 $\mu$ s p->v: 837 $\mu$ s

$\beta_T$ : NaN  $\beta_D$ : NaN

$\beta_P$ : NaN SI: NaN

Session FR: 0.239 Hz

Pk Ev: 8 - Reward (T1/Con)

Pk FR: 5.68Hz (0.29s) MSN

Waveform

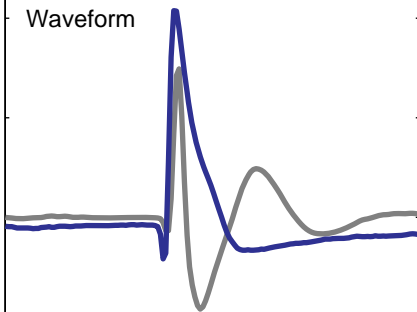

HP/PV

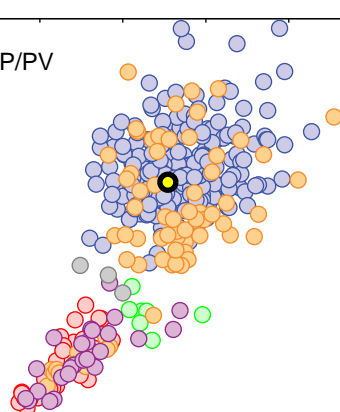

FR/PV

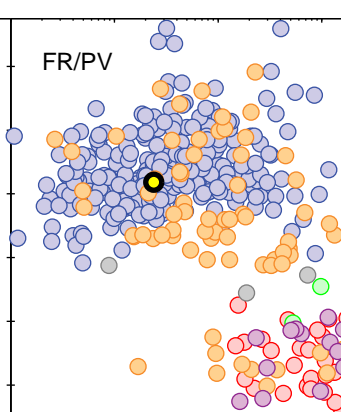

ISI Histogram [17]

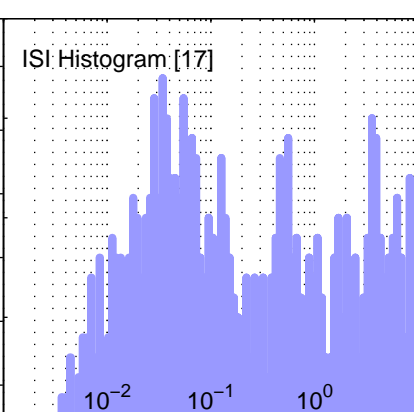

10  
20  
30  
40  
50  
60  
70  
80  
90  
100

1 Cue On [108]

2 Nose In [108]

3 Tone [55,53]

4 Go [108]

5 Choice [55,53]

6 Side In [55,53]

7 Nose Out [55,53]

8 Reward [43,40]

5  
4  
3  
2  
1

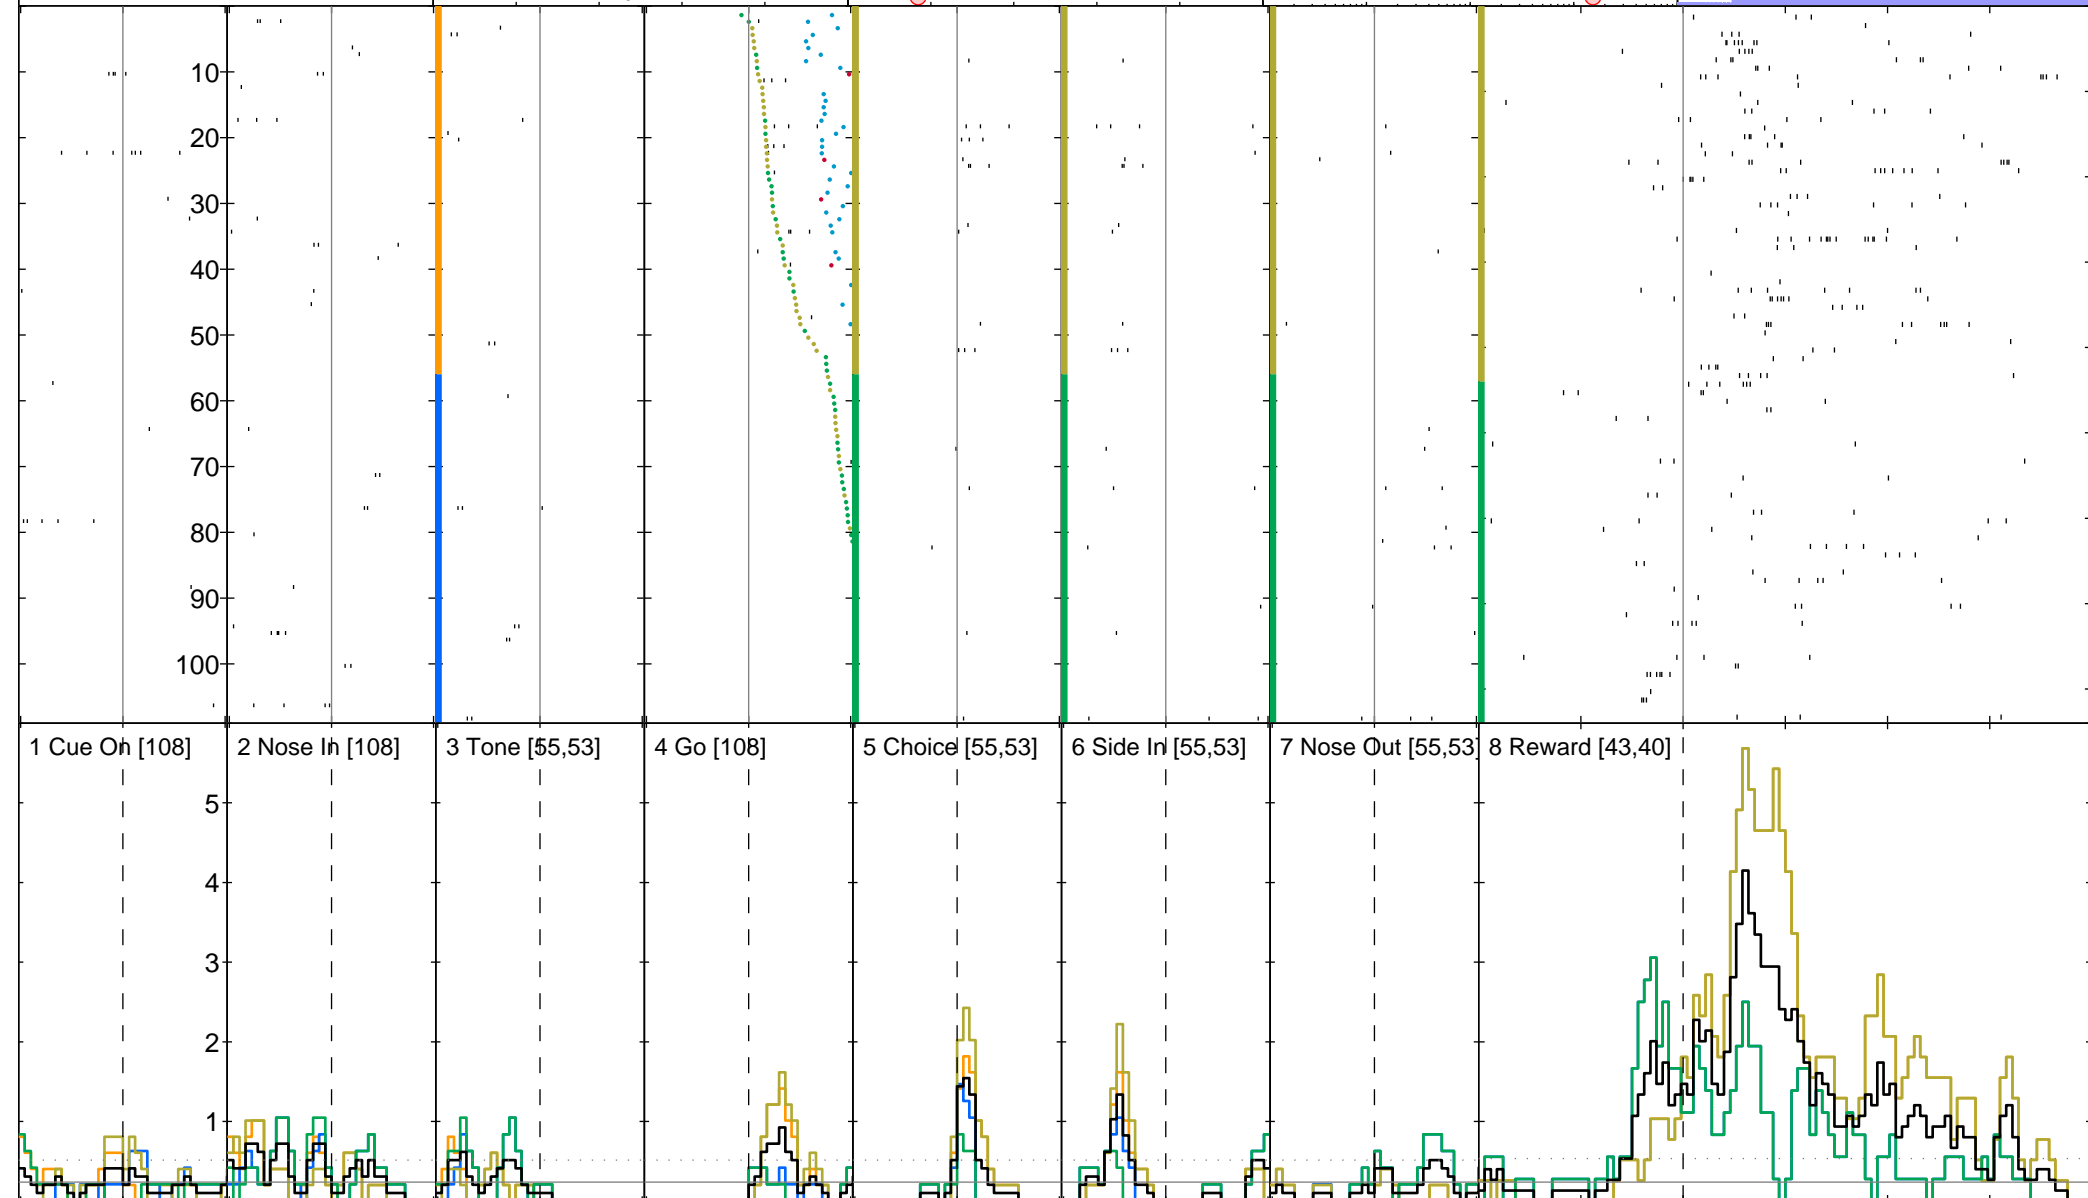



**Cell: C0320070613T15b**

AP: -2.3 ML: 4.6 DV: 6.2

w: 3 n: 2576  $P_{ISI>2}$ : 0.83

1/2pw: 275 $\mu$ s p $\rightarrow$ v: 981 $\mu$ s

$\beta_T$ : -1.6  $\beta_D$ : -4.3

$\beta_P$ : 1.3 SI: -0.93

Session FR: 0.772 Hz

Pk Ev: 8 - Reward (T2/Ipsi)

Pk FR: 11.4Hz (0.35s) **MSN**

Waveform

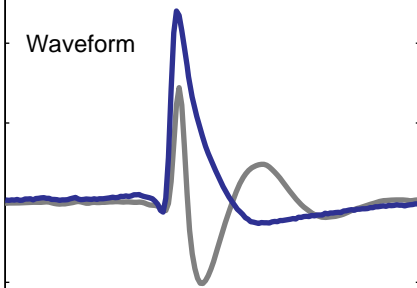

HP/PV

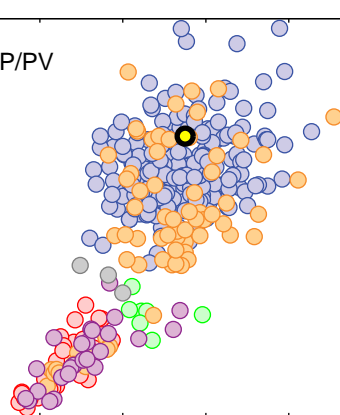

FR/PV

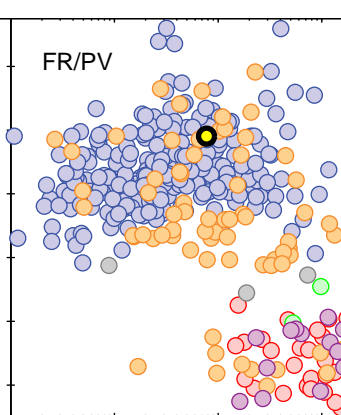

ISI Histogram [77]

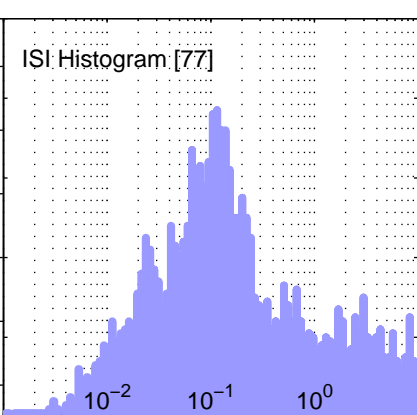

10  
20  
30  
40  
50  
60  
70  
80  
90

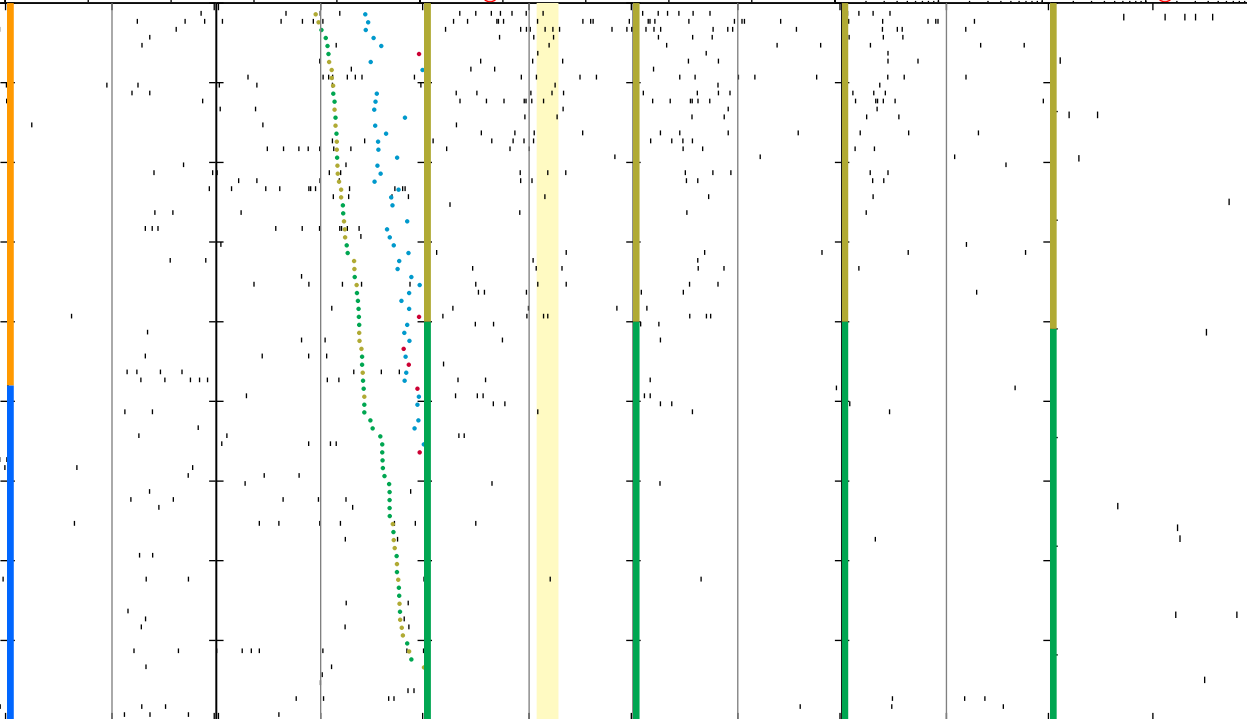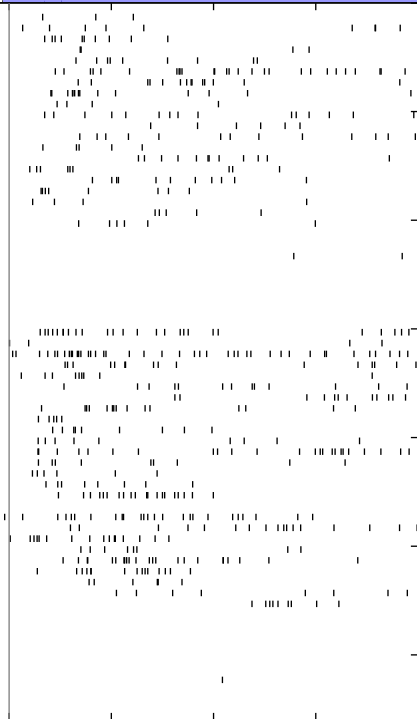

10  
5

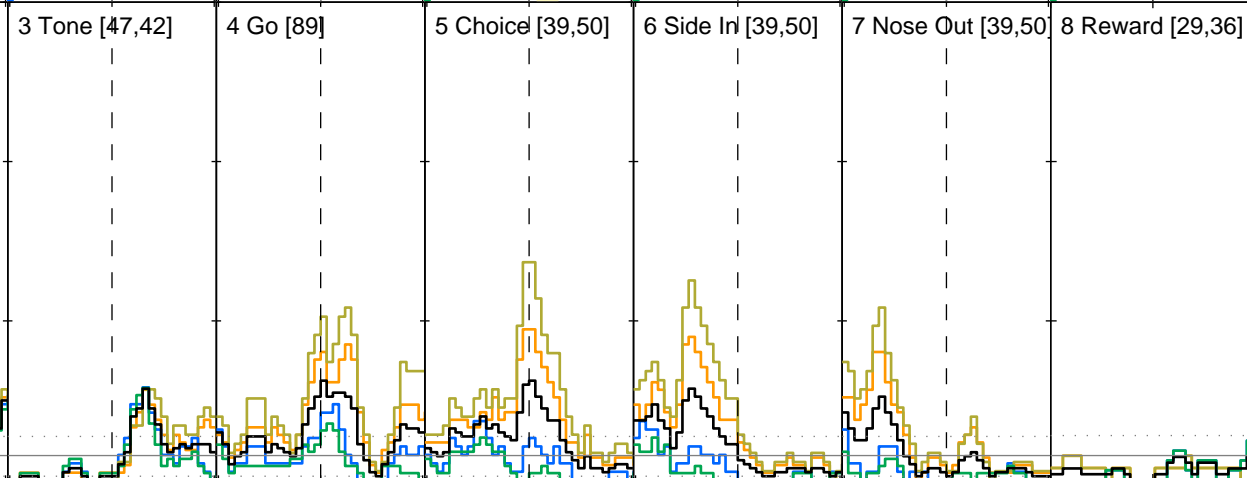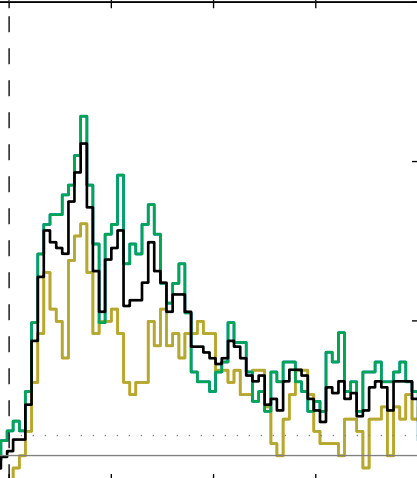

**Cell: C0320070621T07b**

AP: 0.96 ML: 3.6 DV: 6

w: 4 n: 2038  $P_{ISI>2}$ : 0.91/2pw: 266 $\mu$ s p $\rightarrow$ v: 1040 $\mu$ s $\beta_T$ : NaN  $\beta_D$ : NaN $\beta_P$ : NaN SI: NaN

Session FR: 0.669 Hz

Pk Ev: 8 - Reward (T2/Ipsi)

Pk FR: 5.68Hz (0.38s) **MSN**

## Waveform

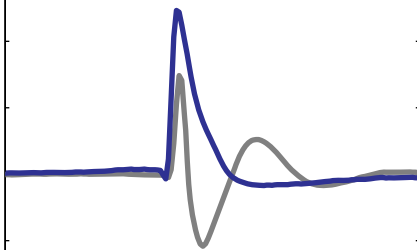

## HP/PV

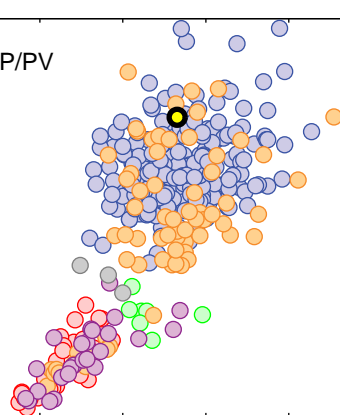

## FR/PV

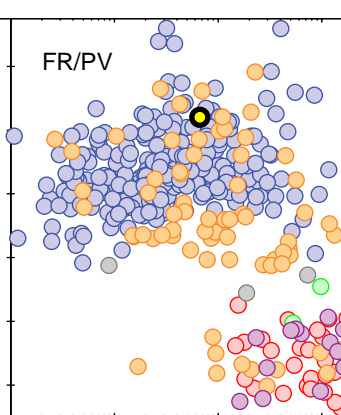

## ISI Histogram [51]

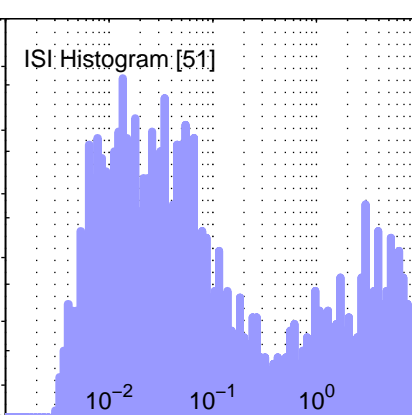10  
20  
30  
40  
50  
60  
70  
80  
90  
100

1 Cue On [104]

2 Nose In [104]

3 Tone [45,59]

4 Go [104]

5 Choice [50,54]

6 Side In [50,54]

7 Nose Out [50,54]

8 Reward [34,43]

5  
4  
3  
2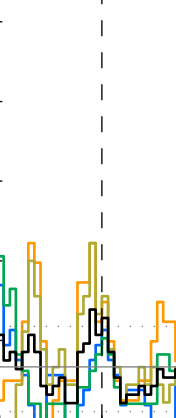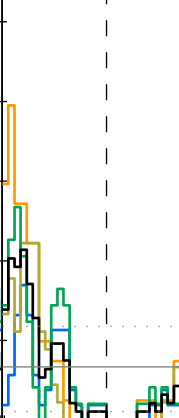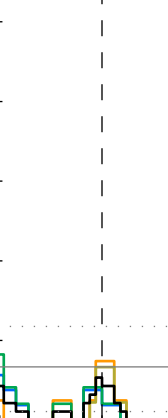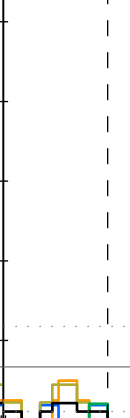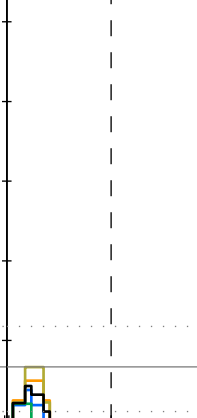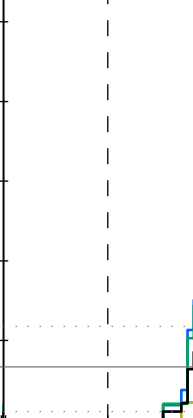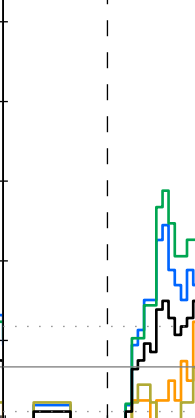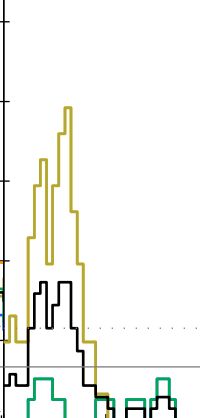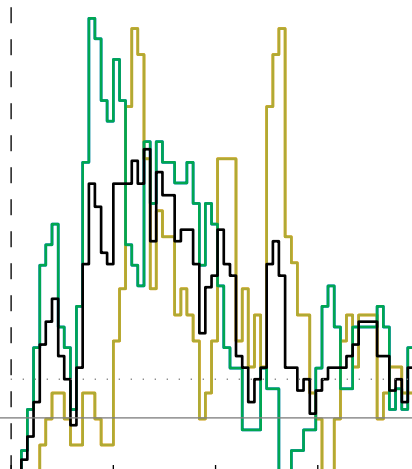

**Cell: C0320070630T09F**

AP: 1.6 ML: 3.7 DV: 6.2  
w: 4 n: 189  $P_{ISI>2}$ : 1  
1/2pw: 235 $\mu$ s p $\rightarrow$ v: 1067 $\mu$ s  
 $\beta_T$ : NaN  $\beta_D$ : NaN  
 $\beta_P$ : NaN SI: NaN  
Session FR: 0.0666 Hz  
Pk Ev: 8 - Reward (T1/Con)  
Pk FR: 6.84Hz (0.44s) **MSN**

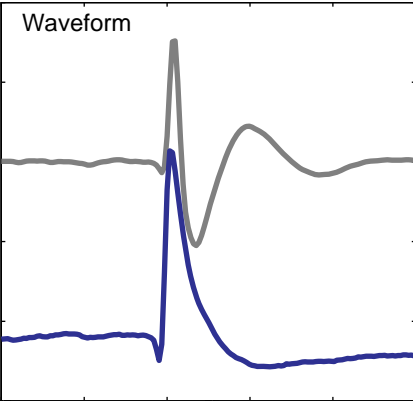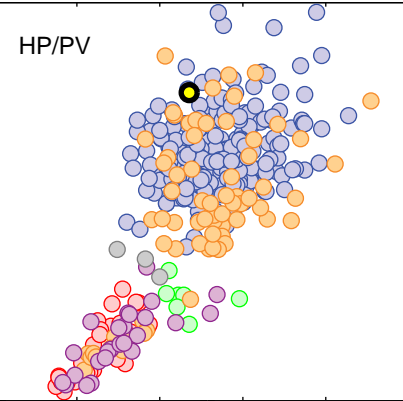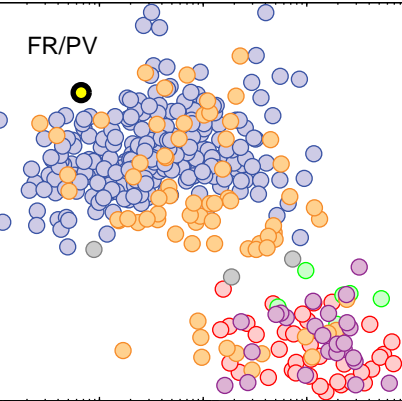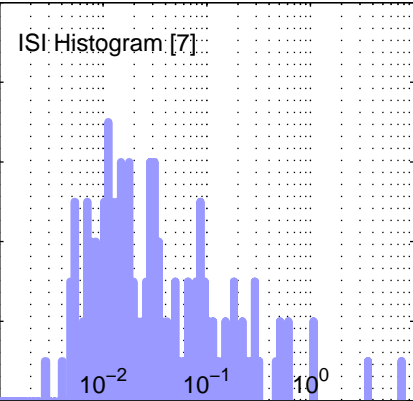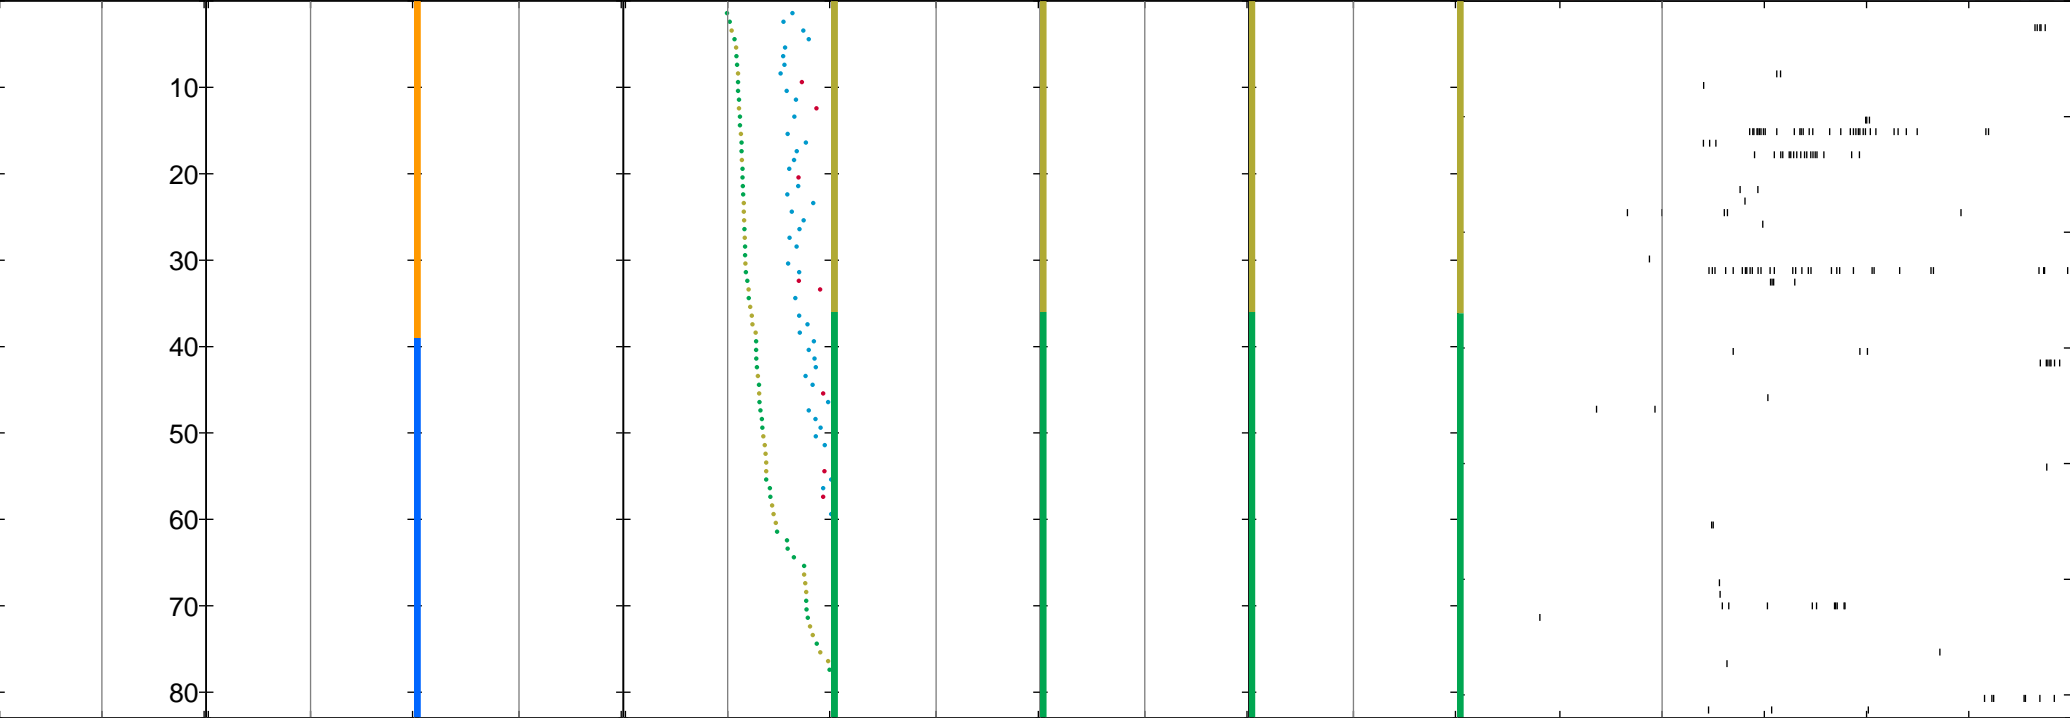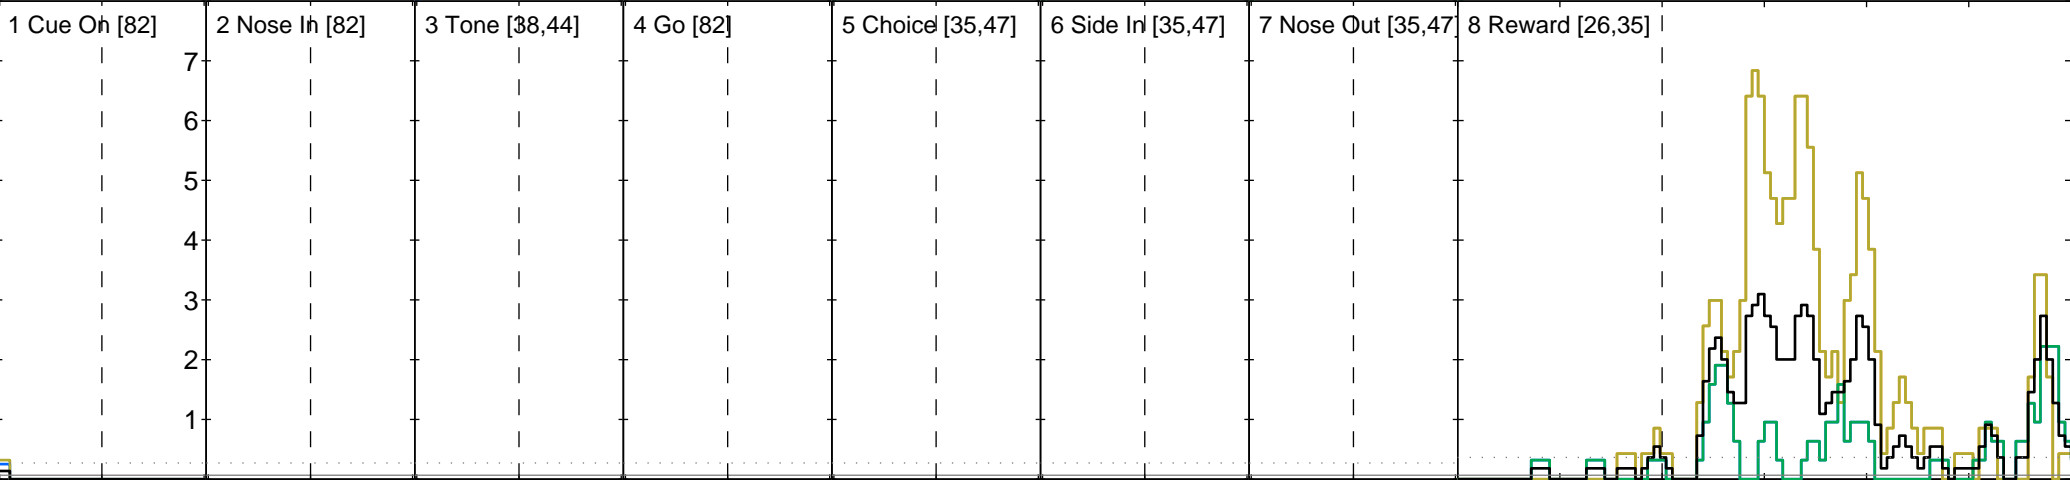

Cell: C0320070626T07d

AP: 0.96 ML: 3.6 DV: 6.8

w: 4 n: 3022  $P_{ISI>2}$ : 0.84

1/2pw: 302 $\mu$ s p->v: 806 $\mu$ s

$\beta_T$ : NaN  $\beta_D$ : NaN

$\beta_P$ : NaN SI: NaN

Session FR: 0.809 Hz

Pk Ev: 8 - Reward (T1/Con)

Pk FR: 16.5Hz (0.53s) MSN

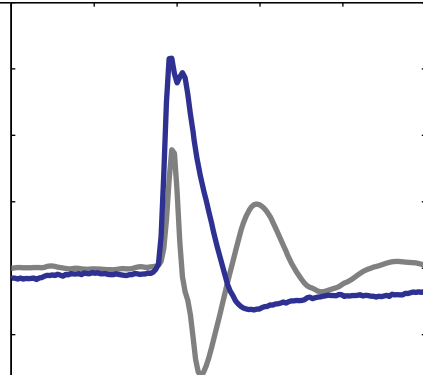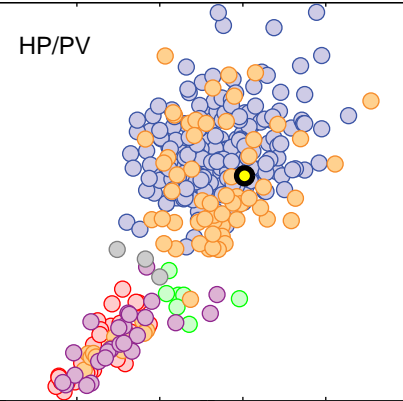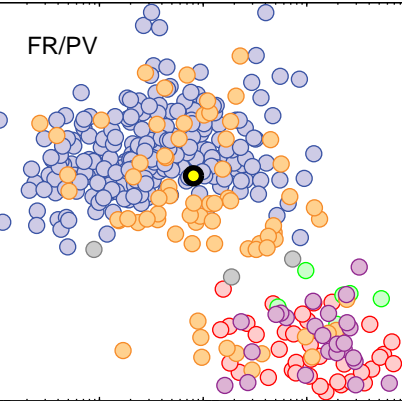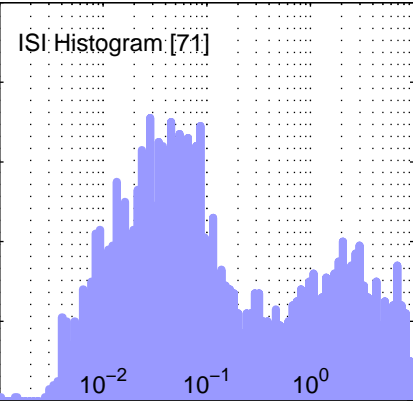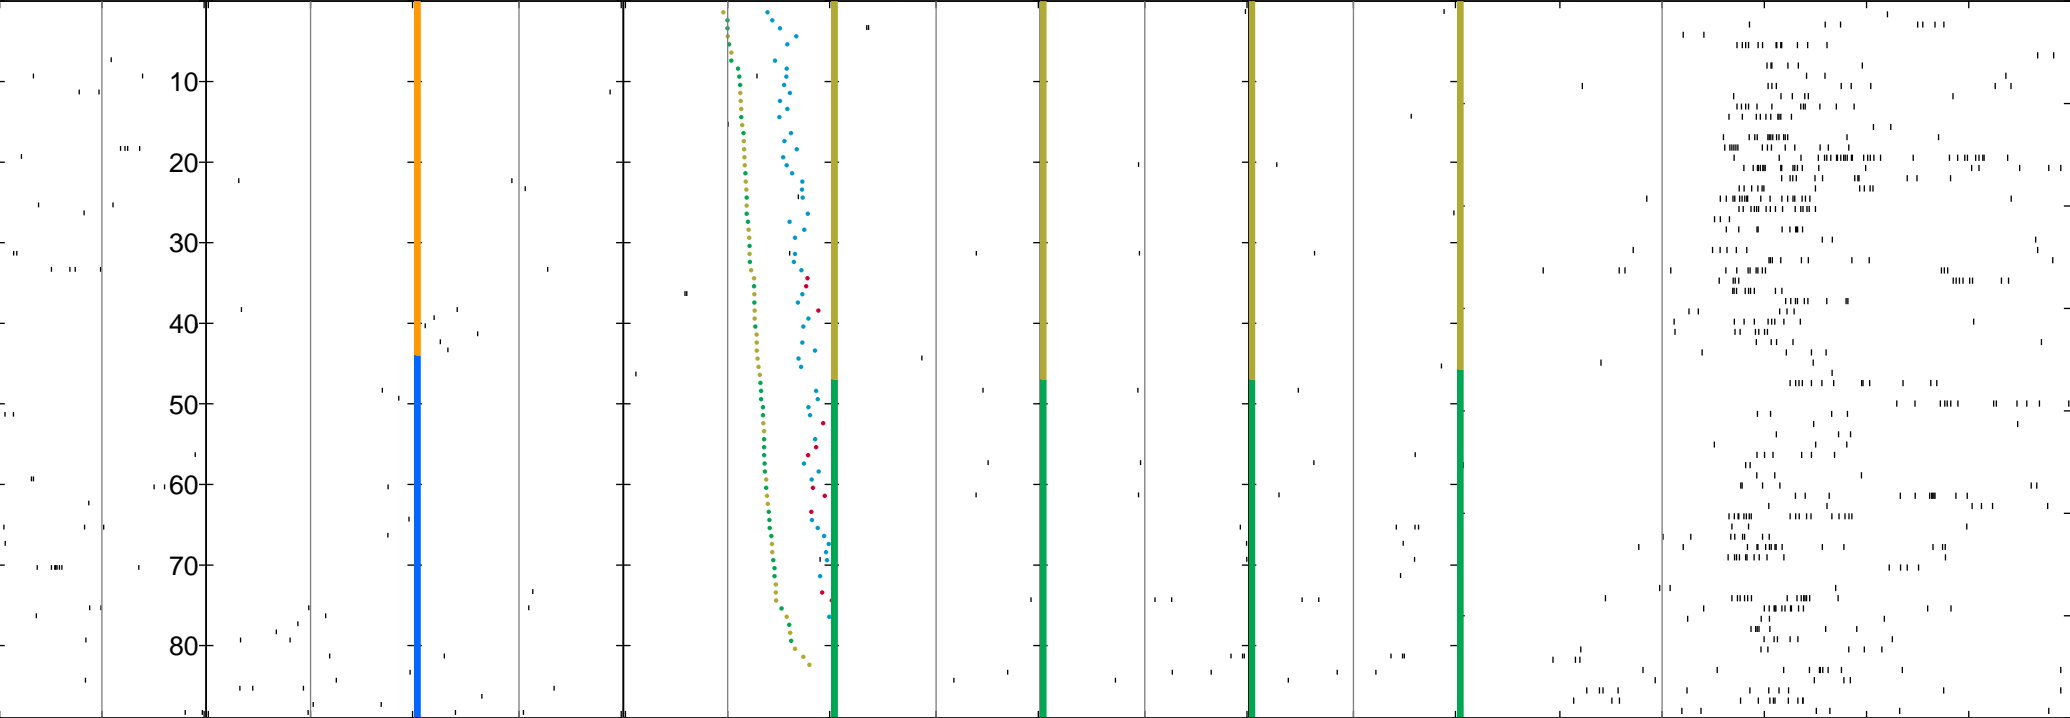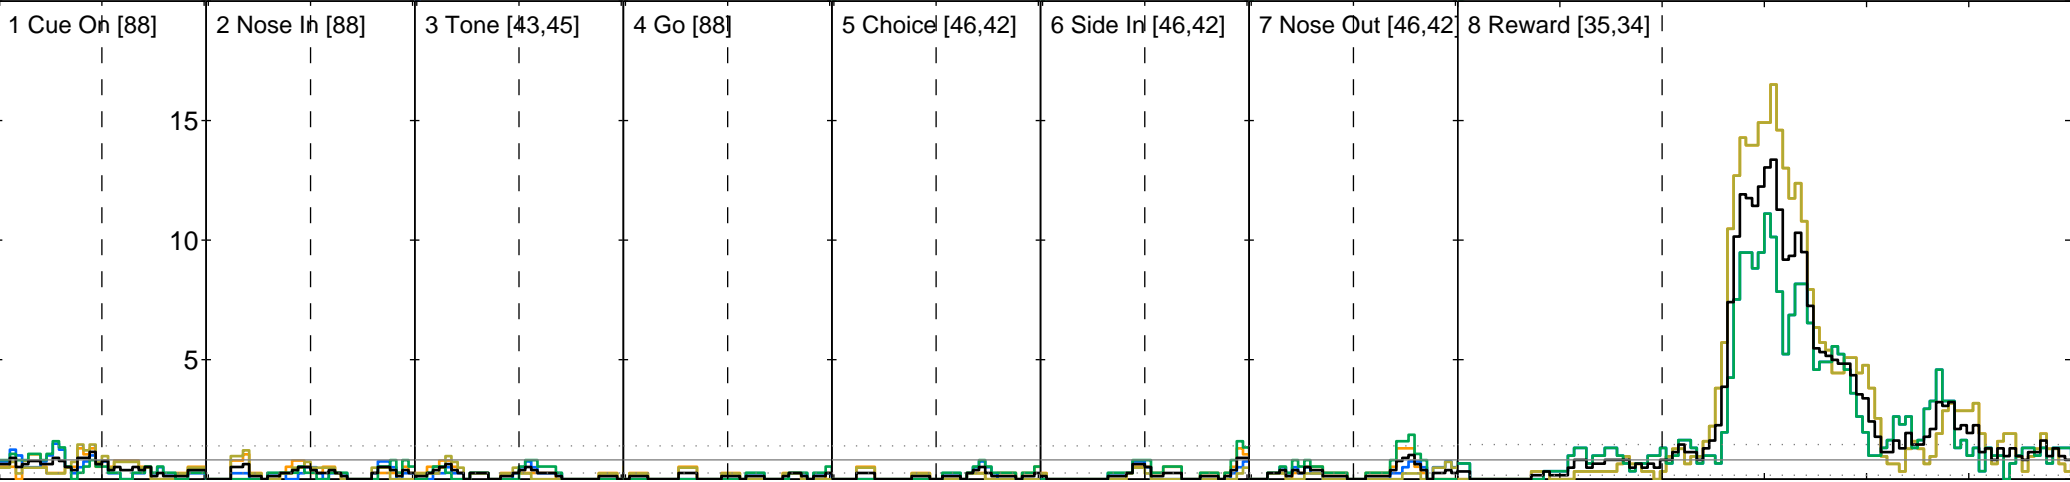

**Cell: C0320070619T09h**

AP: 1.6 ML: 3.7 DV: 5  
w: 4 n: 1336  $P_{ISI>2}$ : 0.98  
1/2pw: 389 $\mu$ s p->v: 1320 $\mu$ s  
 $\beta_T$ : NaN  $\beta_D$ : NaN  
 $\beta_P$ : NaN SI: NaN  
Session FR: 0.318 Hz  
Pk Ev: 8 - Reward (T1/Con)  
Pk FR: 29.4Hz (0.62s) **MSN**

Waveform

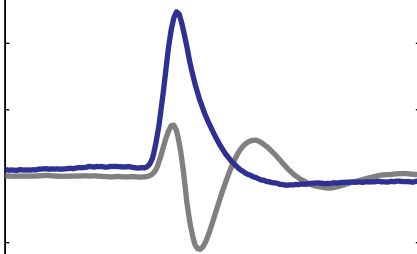

HP/PV

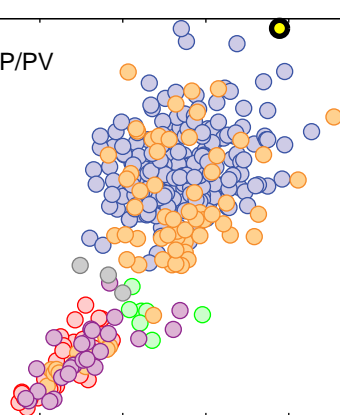

FR/PV

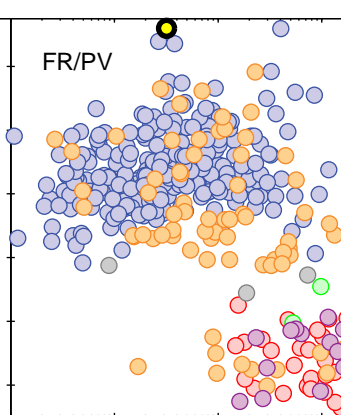

ISI Histogram [54]

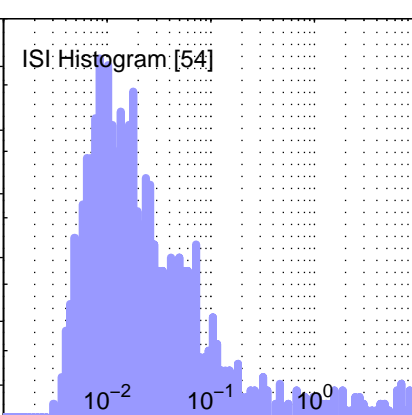

10  
20  
30  
40  
50  
60  
70  
80  
90

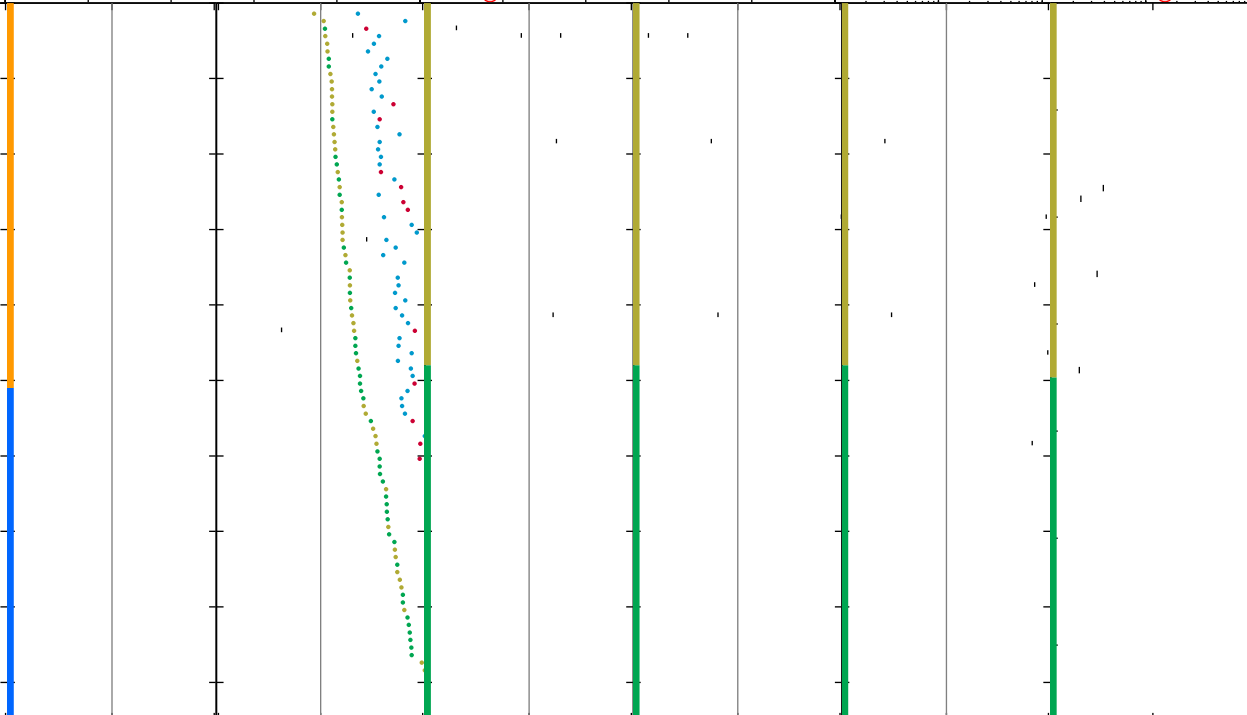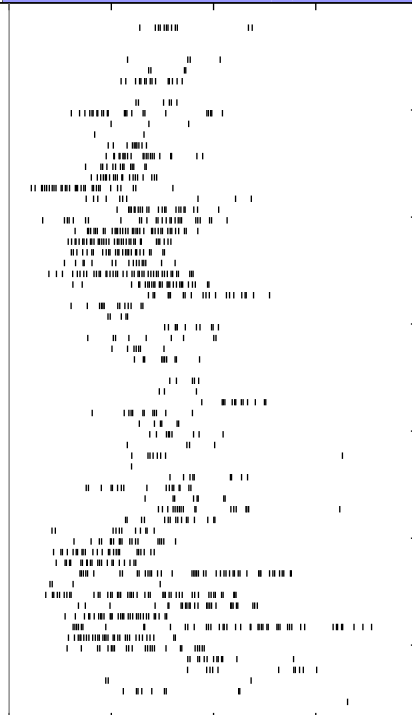

1 Cue On [94] 2 Nose In [94] 3 Tone [50,44] 4 Go [94] 5 Choice [47,47] 6 Side In [47,47] 7 Nose Out [47,47] 8 Reward [34,32]

25  
20  
15  
10  
5

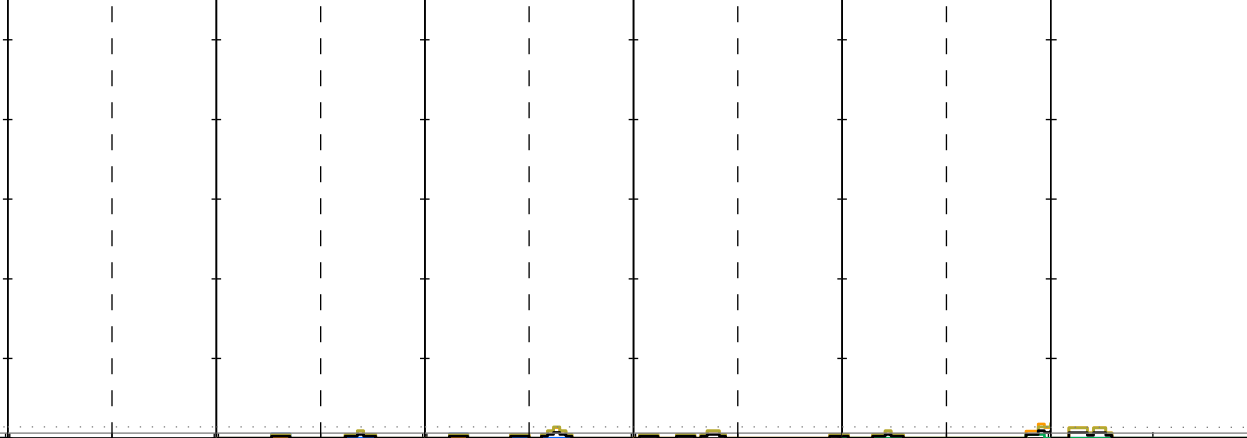

**Cell: C0320070621T09e**

AP: 1.6 ML: 3.7 DV: 5.1  
w: 4 n: 1037  $P_{ISI>2}$ : 0.76  
1/2pw: 309 $\mu$ s p->v: 790 $\mu$ s  
 $\beta_T$ : NaN  $\beta_D$ : NaN  
 $\beta_P$ : NaN SI: NaN  
Session FR: 0.691 Hz  
Pk Ev: 8 - Reward (T1/Con)  
Pk FR: 5.23Hz (0.62s) **MSN**

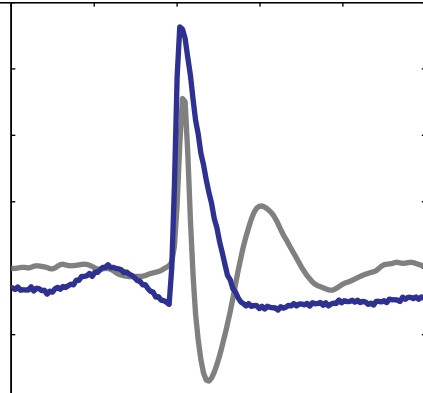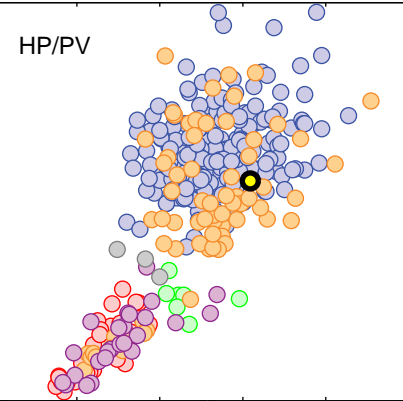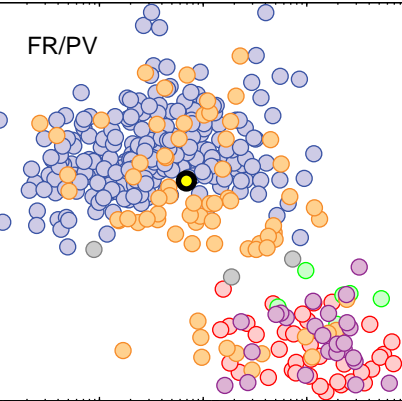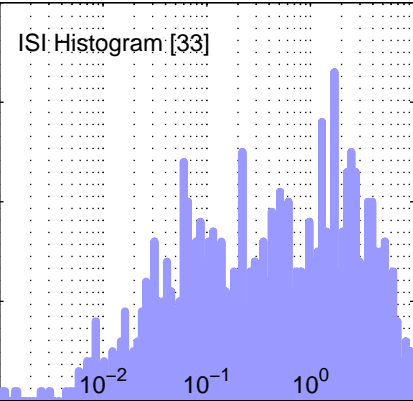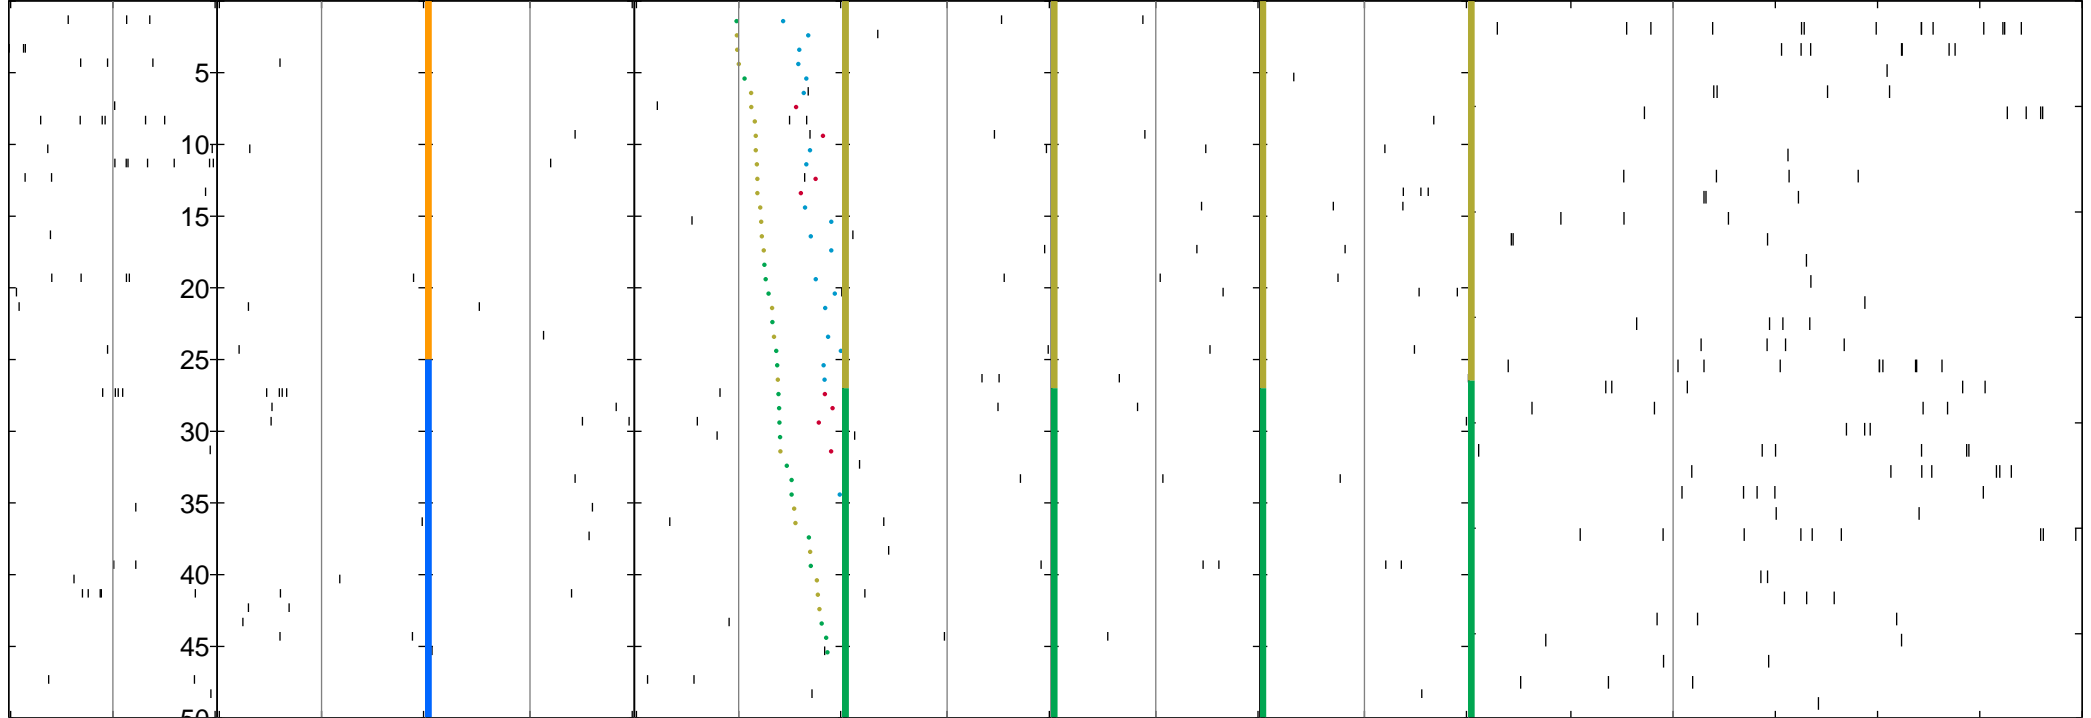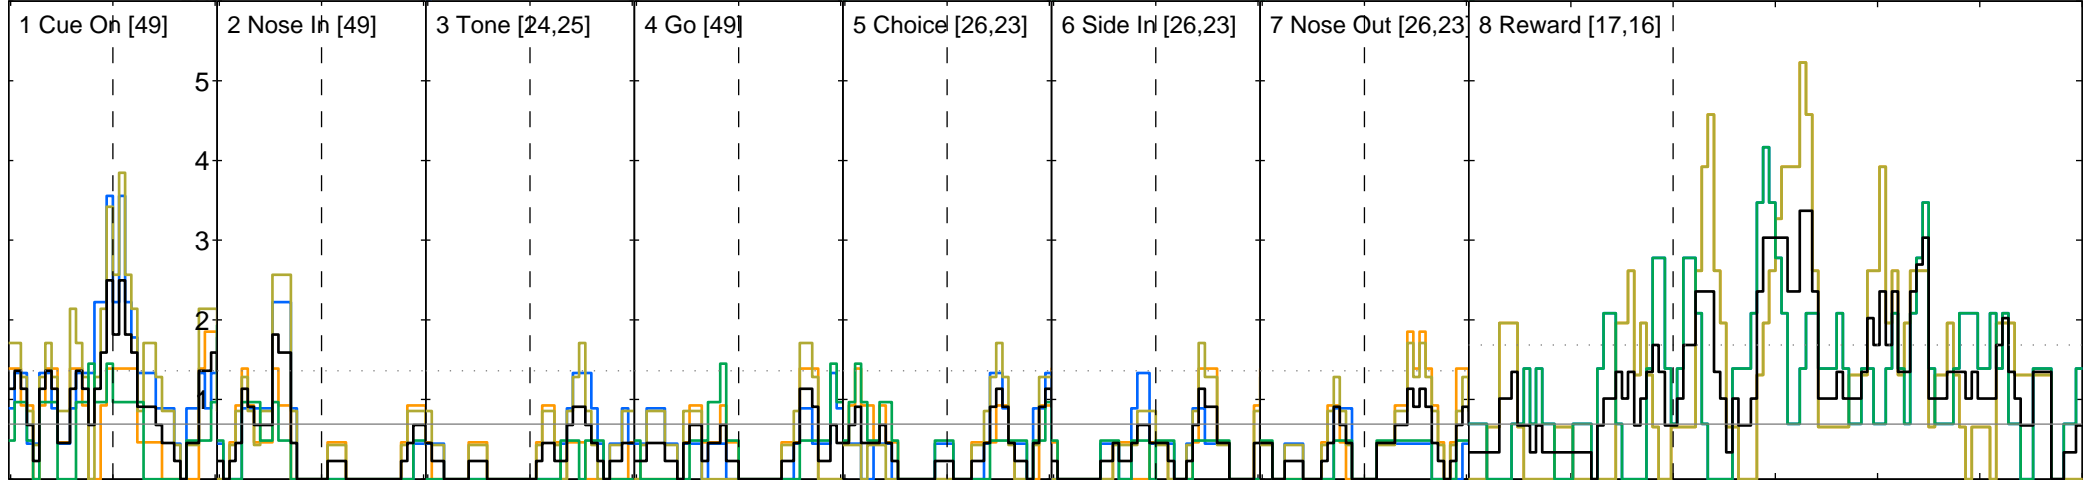

**Cell: C0320070622T11c**

AP: -0.96 ML: 3.7 DV: 5.8

w: 2 n: 1066  $P_{ISI>2}$ : 0.96

1/2pw: 272 $\mu$ s p->v: 875 $\mu$ s

$\beta_T$ : NaN  $\beta_D$ : NaN

$\beta_P$ : NaN SI: NaN

Session FR: 0.272 Hz

Pk Ev: 8 - Reward (T2/Ipsi)

Pk FR: 8.55Hz (0.68s) **MSN**

Waveform

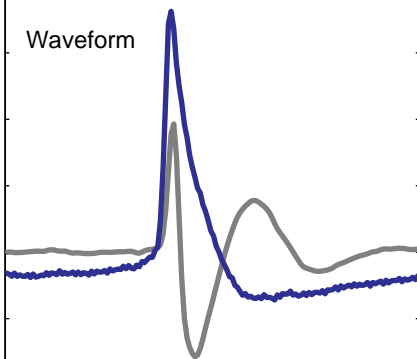

HP/PV

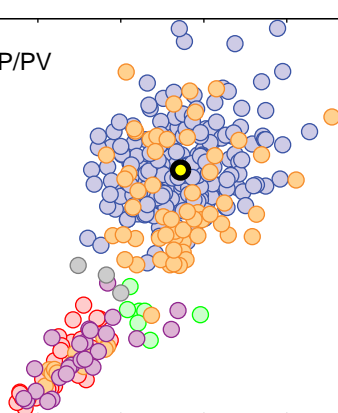

FR/PV

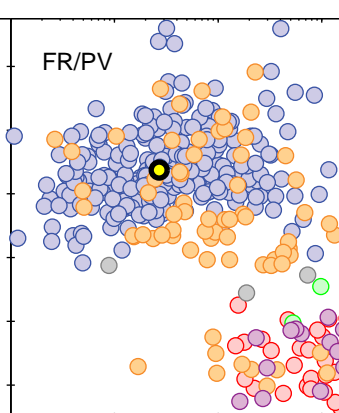

ISI Histogram [33]

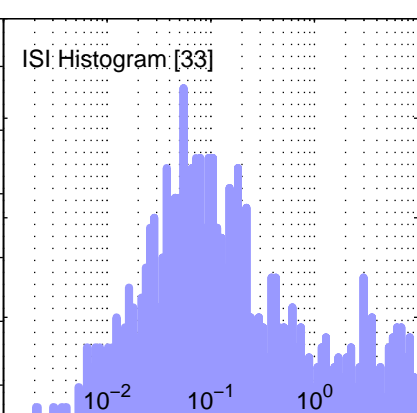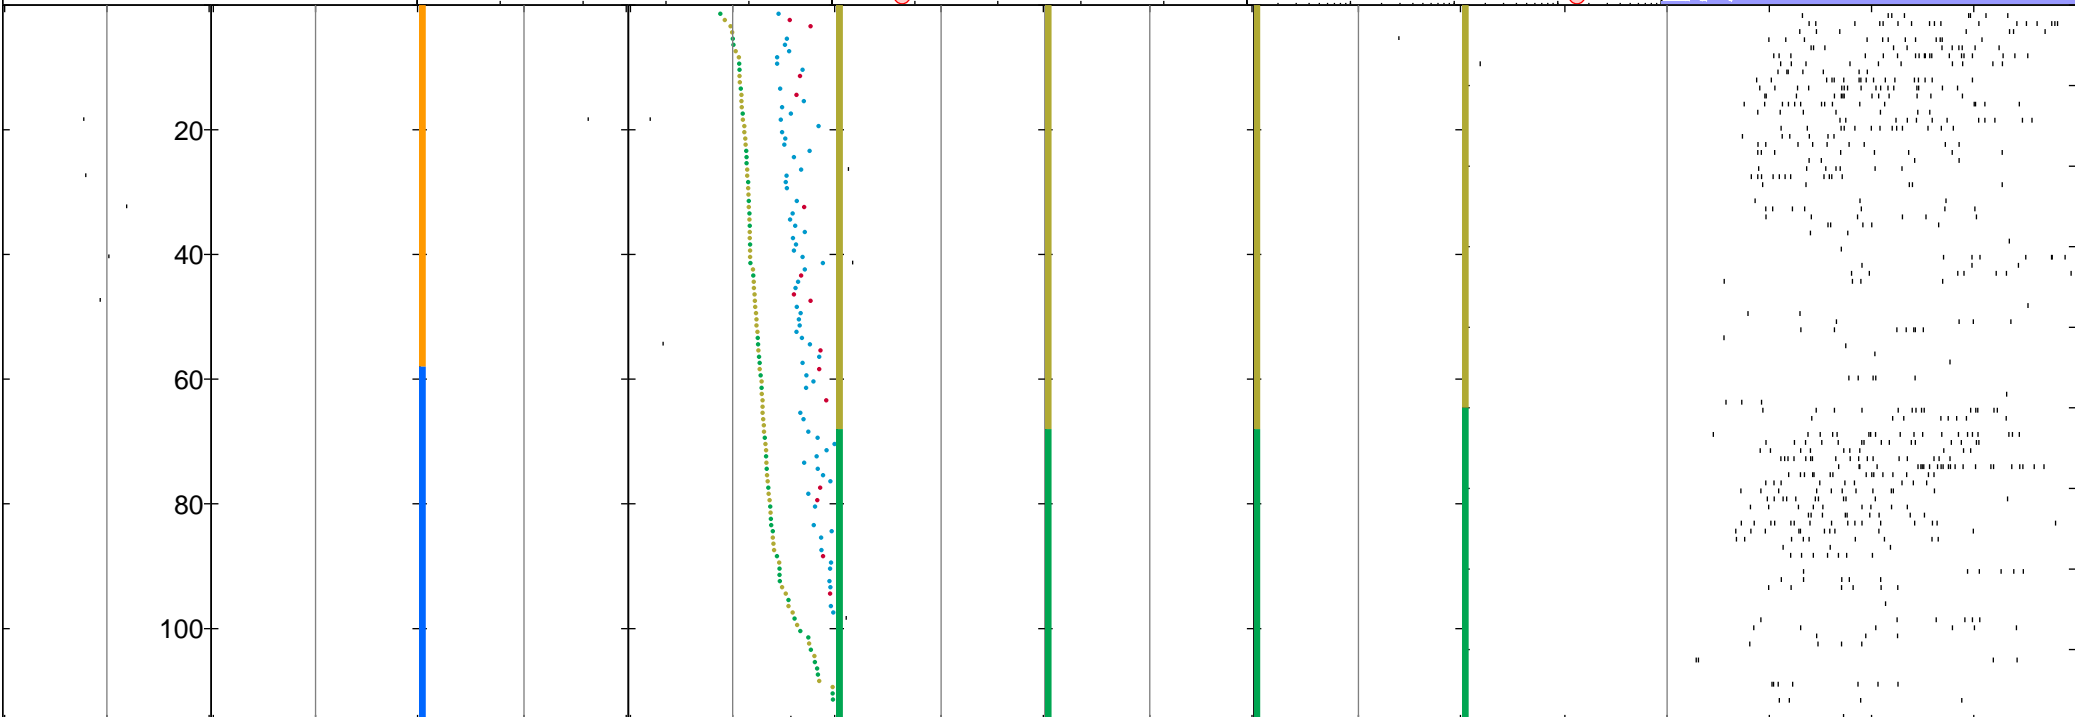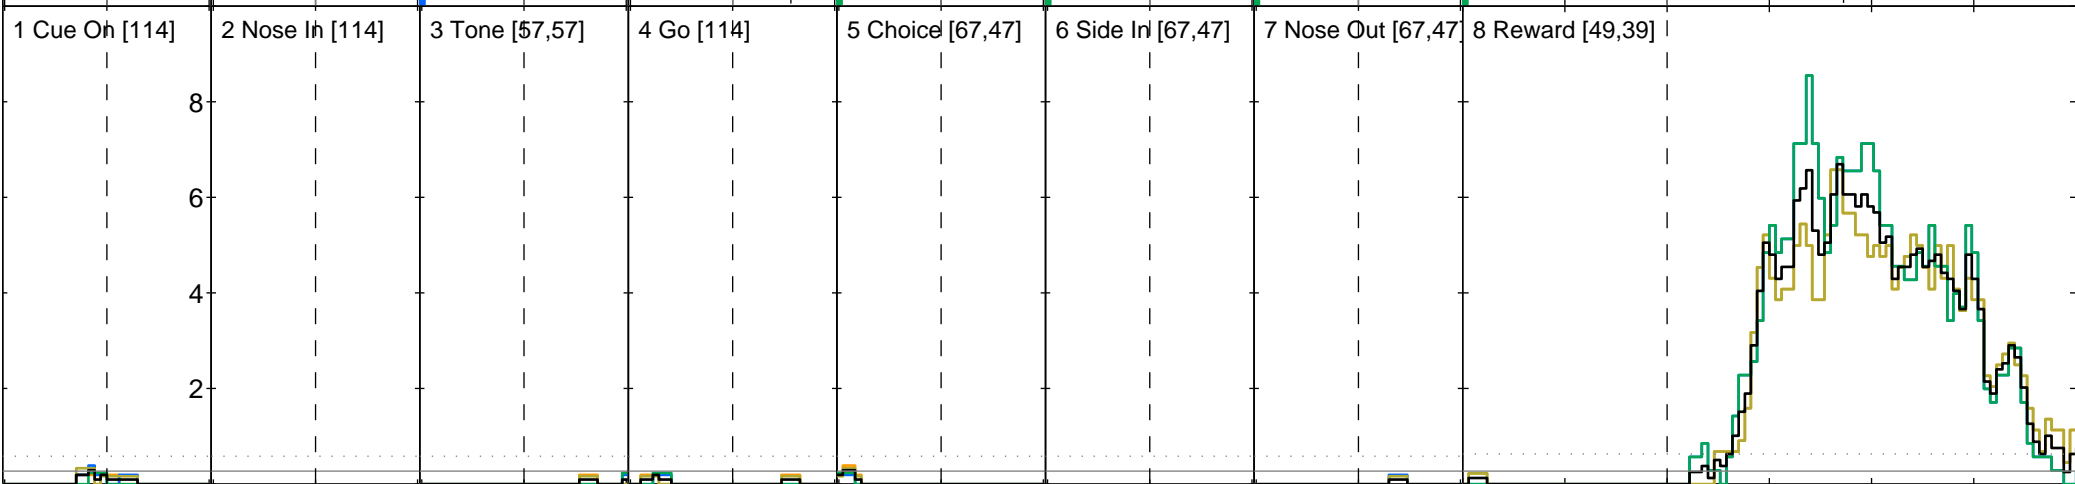



**Cell: C0420070301T04a**

AP: 2.5 ML: 1.8 DV: 5.8  
w: 4 n: 14734  $P_{ISI>2}$ : 0.17  
1/2pw: 270 $\mu$ s p->v: 1318 $\mu$ s  
 $\beta_T$ : 2.3  $\beta_D$ : -2.1  
 $\beta_P$ : -2.8 SI: NaN  
Session FR: 4.04 Hz  
Pk Ev: 8 - Reward (T2/Ipsi)  
Pk FR: 14.6Hz (0.68s) **MSN**

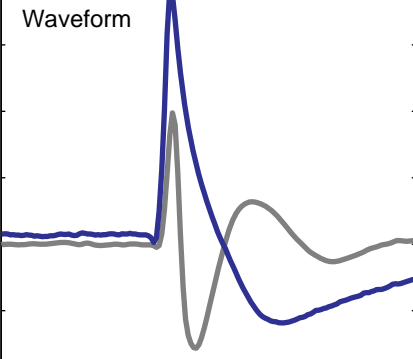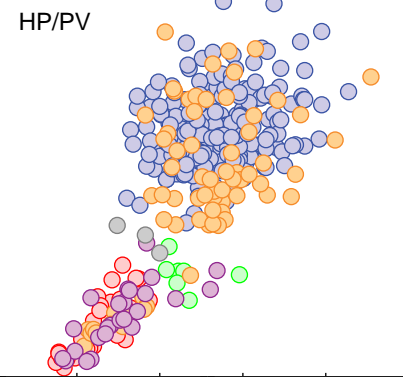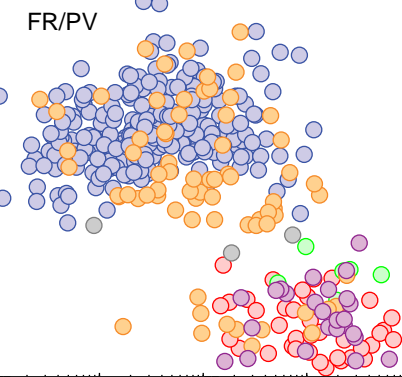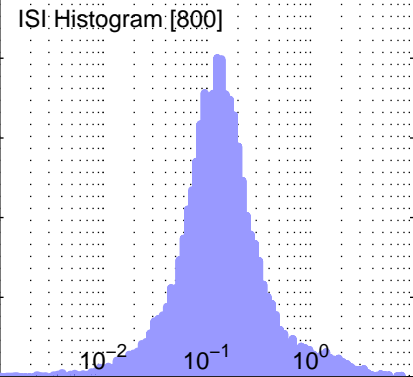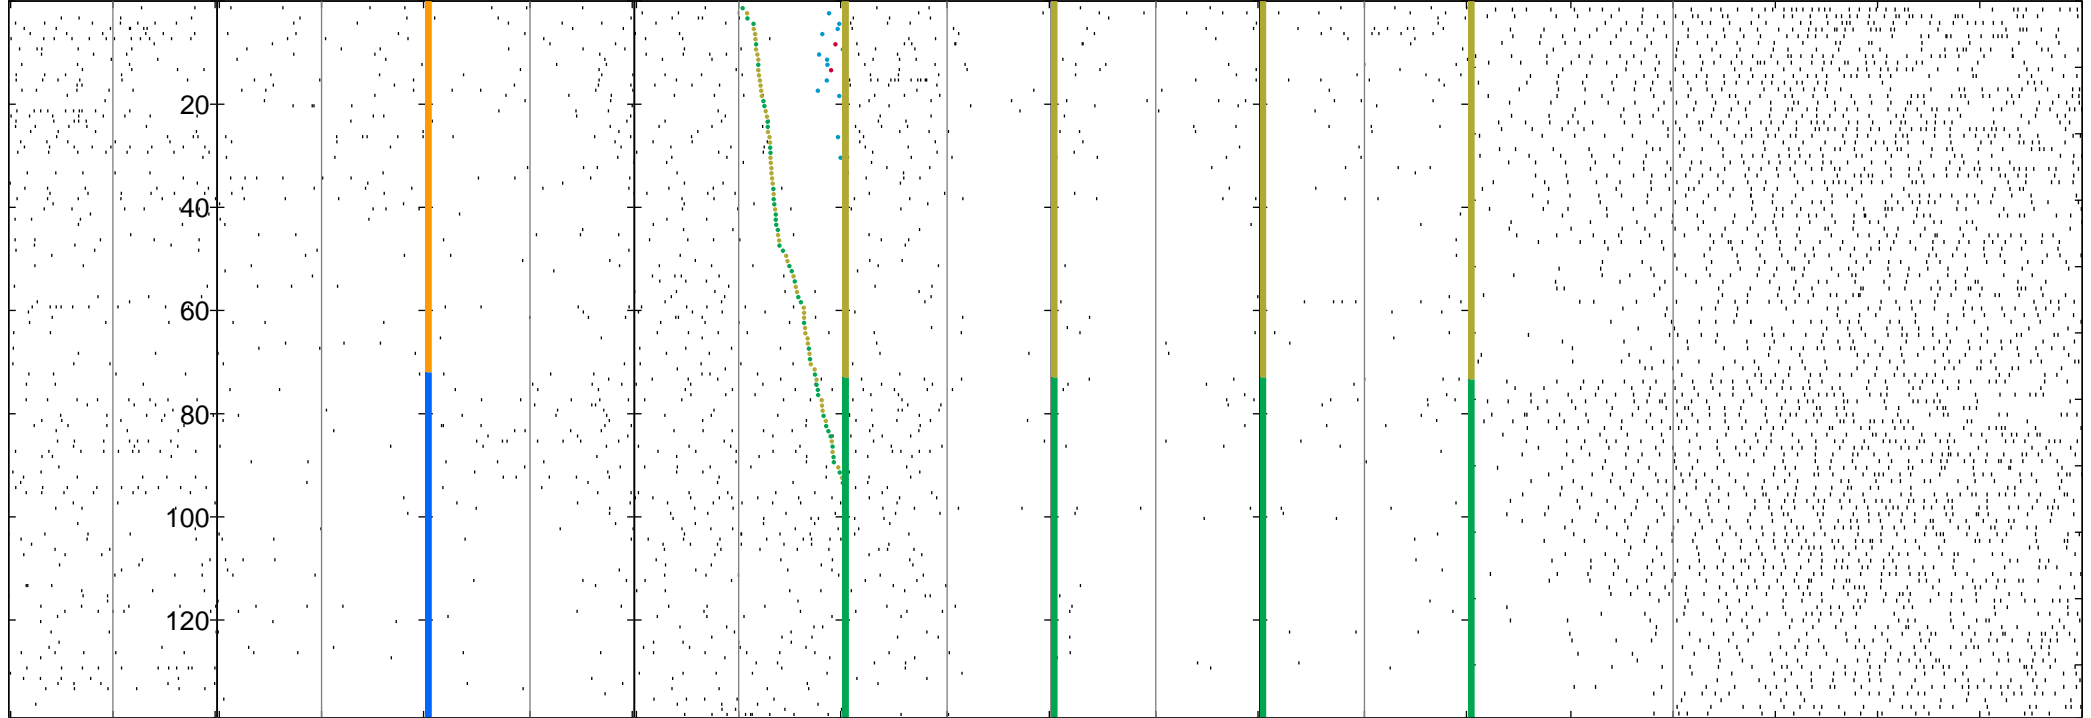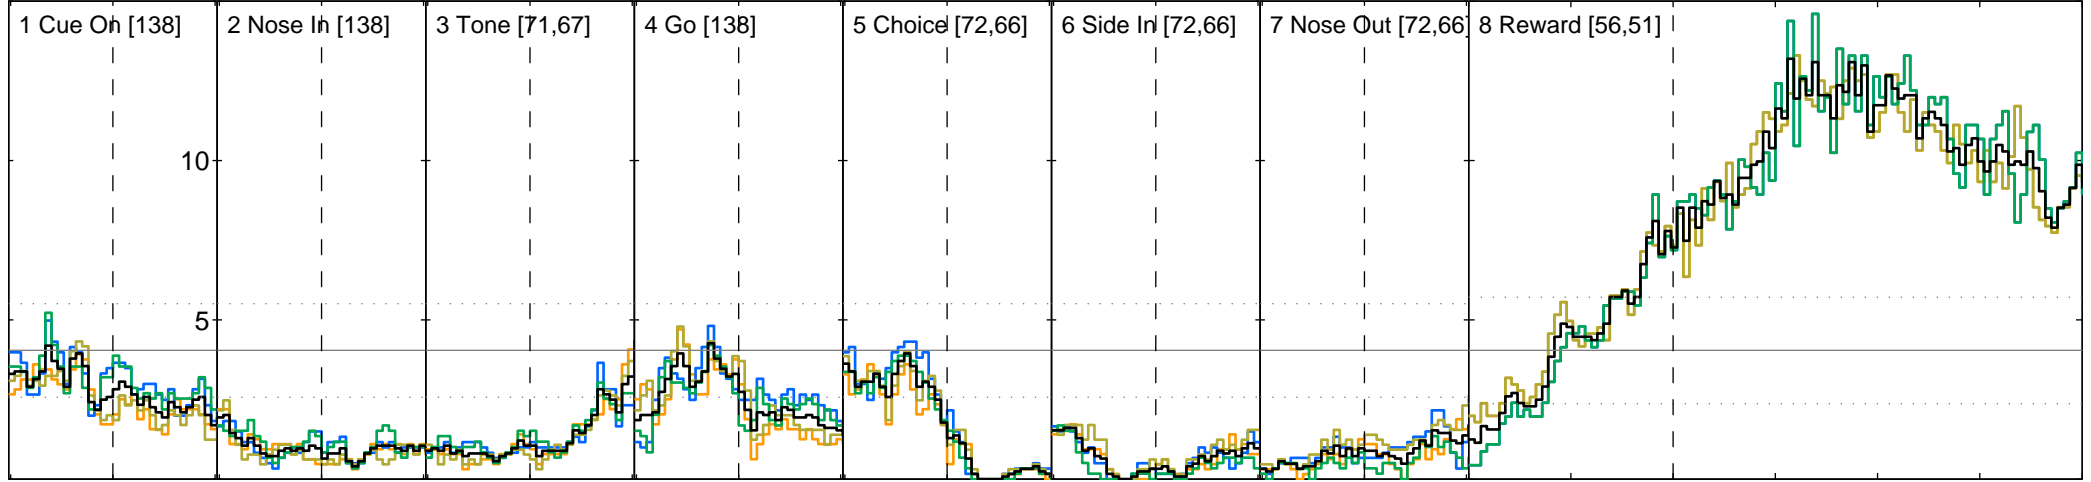

**Cell: C0320070623T07d**

AP: 0.96 ML: 3.6 DV: 6.3

w: 4 n: 8452  $P_{ISI>2}$ : 0.631/2pw: 334 $\mu$ s p $\rightarrow$ v: 981 $\mu$ s $\beta_T$ : NaN  $\beta_D$ : NaN $\beta_P$ : NaN SI: NaN

Session FR: 2.23 Hz

Pk Ev: 8 - Reward (T1/Con)

Pk FR: 14.2Hz (0.74s) **MSN**

Waveform

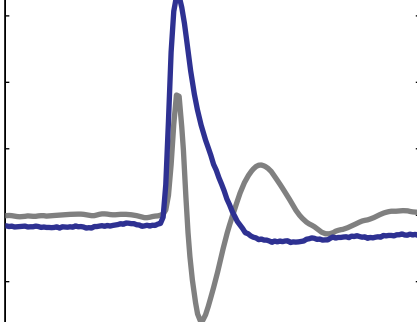

HP/PV

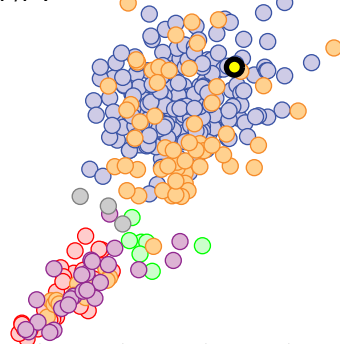

FR/PV

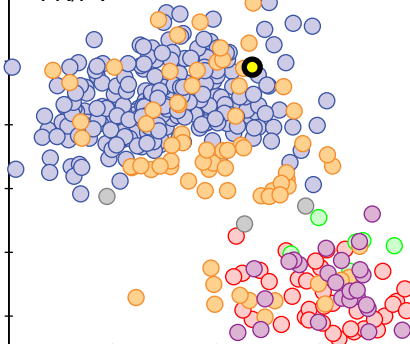

ISI Histogram [182]

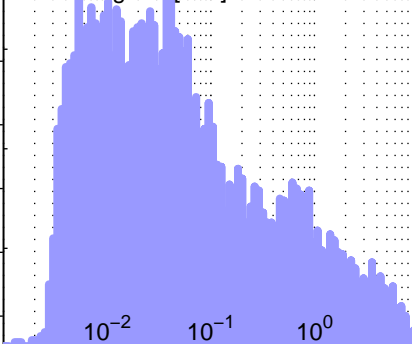10  
20  
30  
40  
50  
60  
70  
80  
90  
100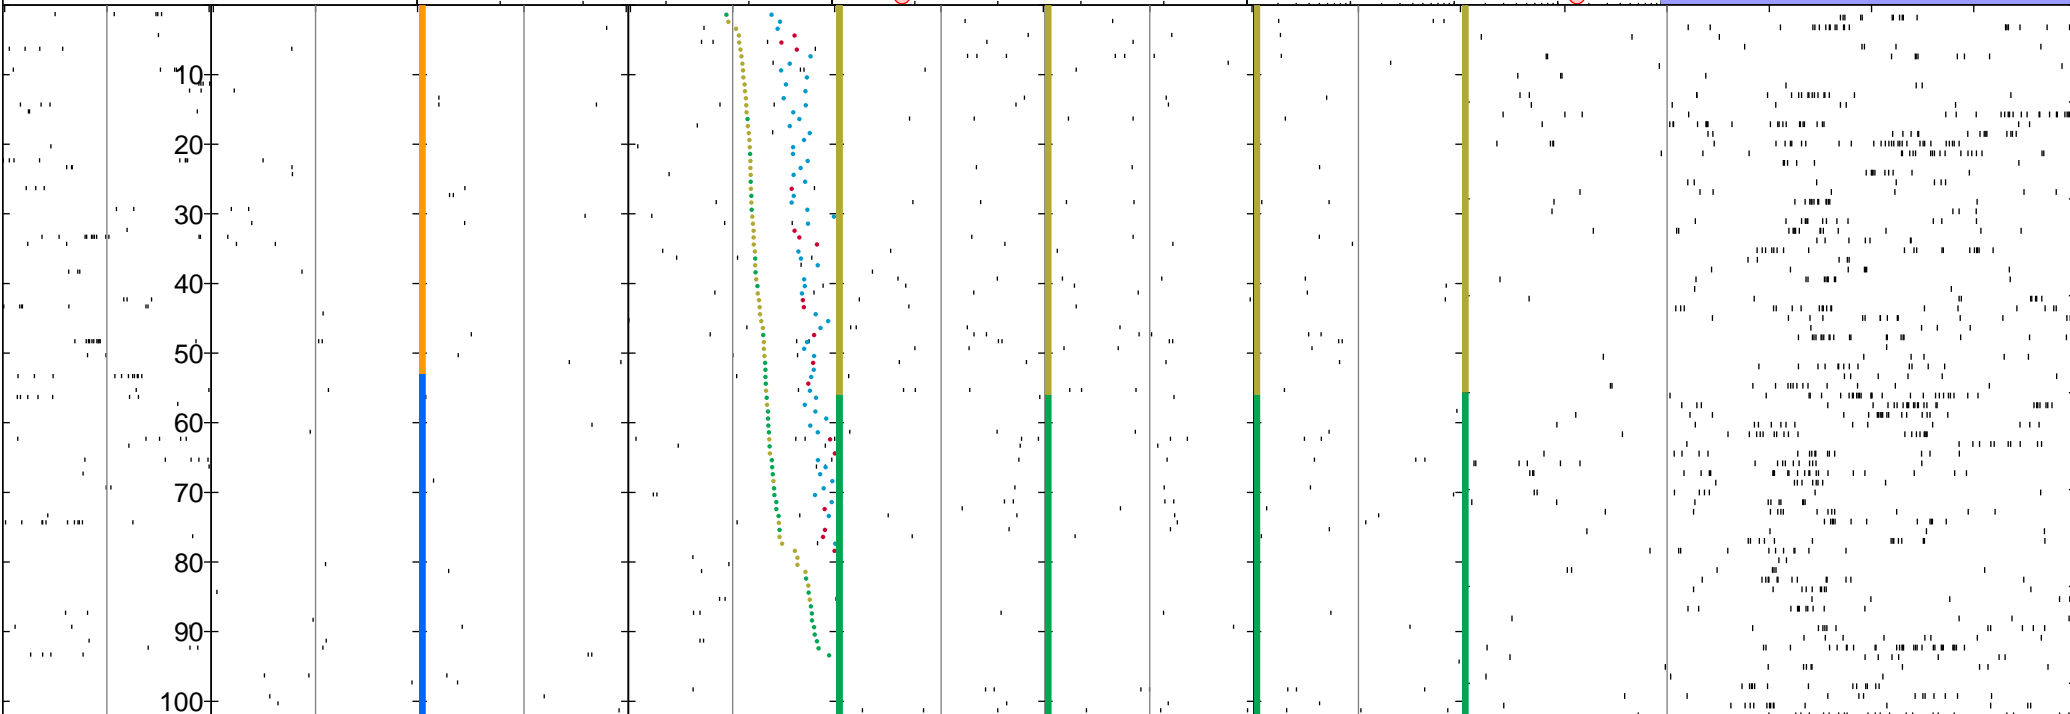

1 Cue On [102]

2 Nose In [102]

3 Tone [52,50]

4 Go [102]

5 Choice [55,47]

6 Side In [55,47]

7 Nose Out [55,47]

8 Reward [39,34]

10  
5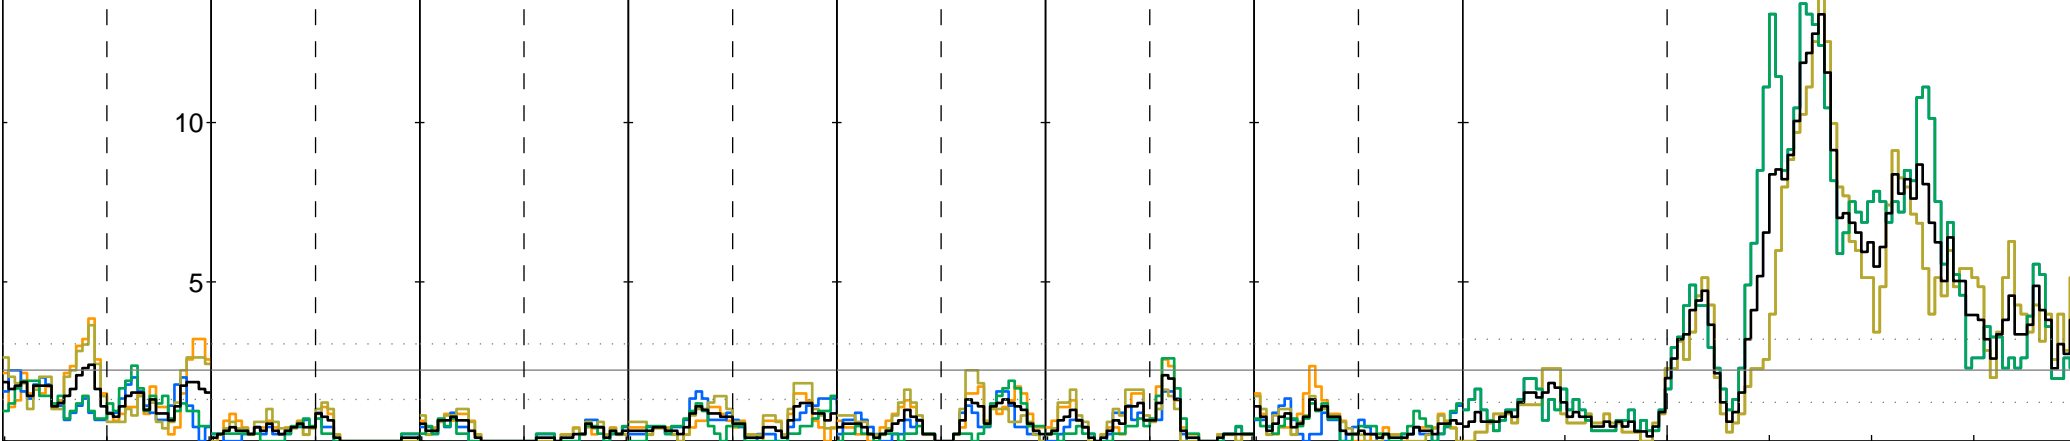

**Cell: C0320070623T11b**

AP: -0.96 ML: 3.7 DV: 5.9  
w: 2 n: 1242  $P_{ISI>2}$ : 0.98  
1/2pw: 291 $\mu$ s p->v: 1066 $\mu$ s  
 $\beta_T$ : NaN  $\beta_D$ : NaN  
 $\beta_P$ : NaN SI: NaN  
Session FR: 0.351 Hz  
Pk Ev: 8 - Reward (T2/Ipsi)  
Pk FR: 16.3Hz (0.95s) **MSN**

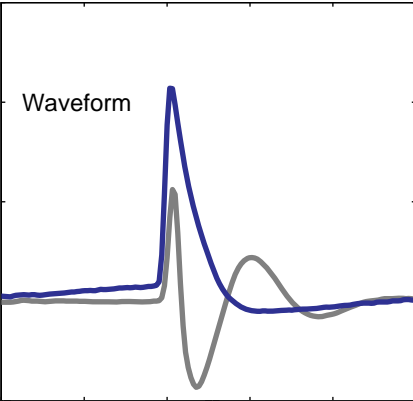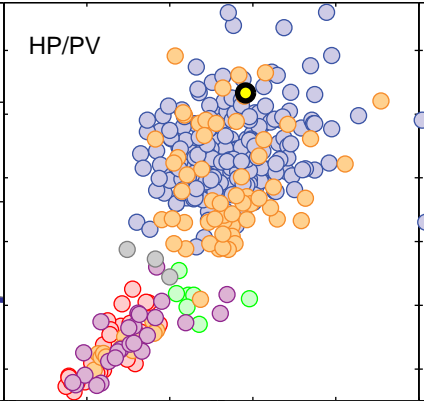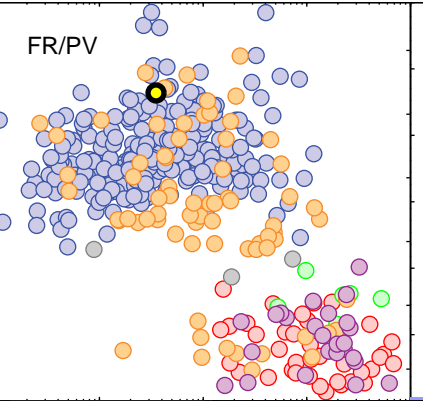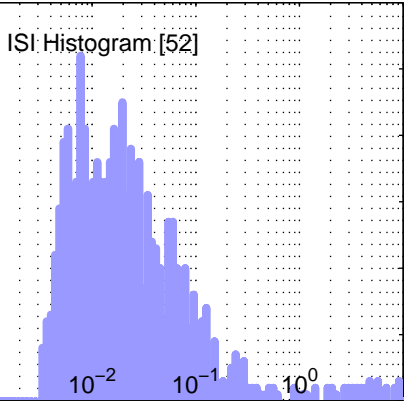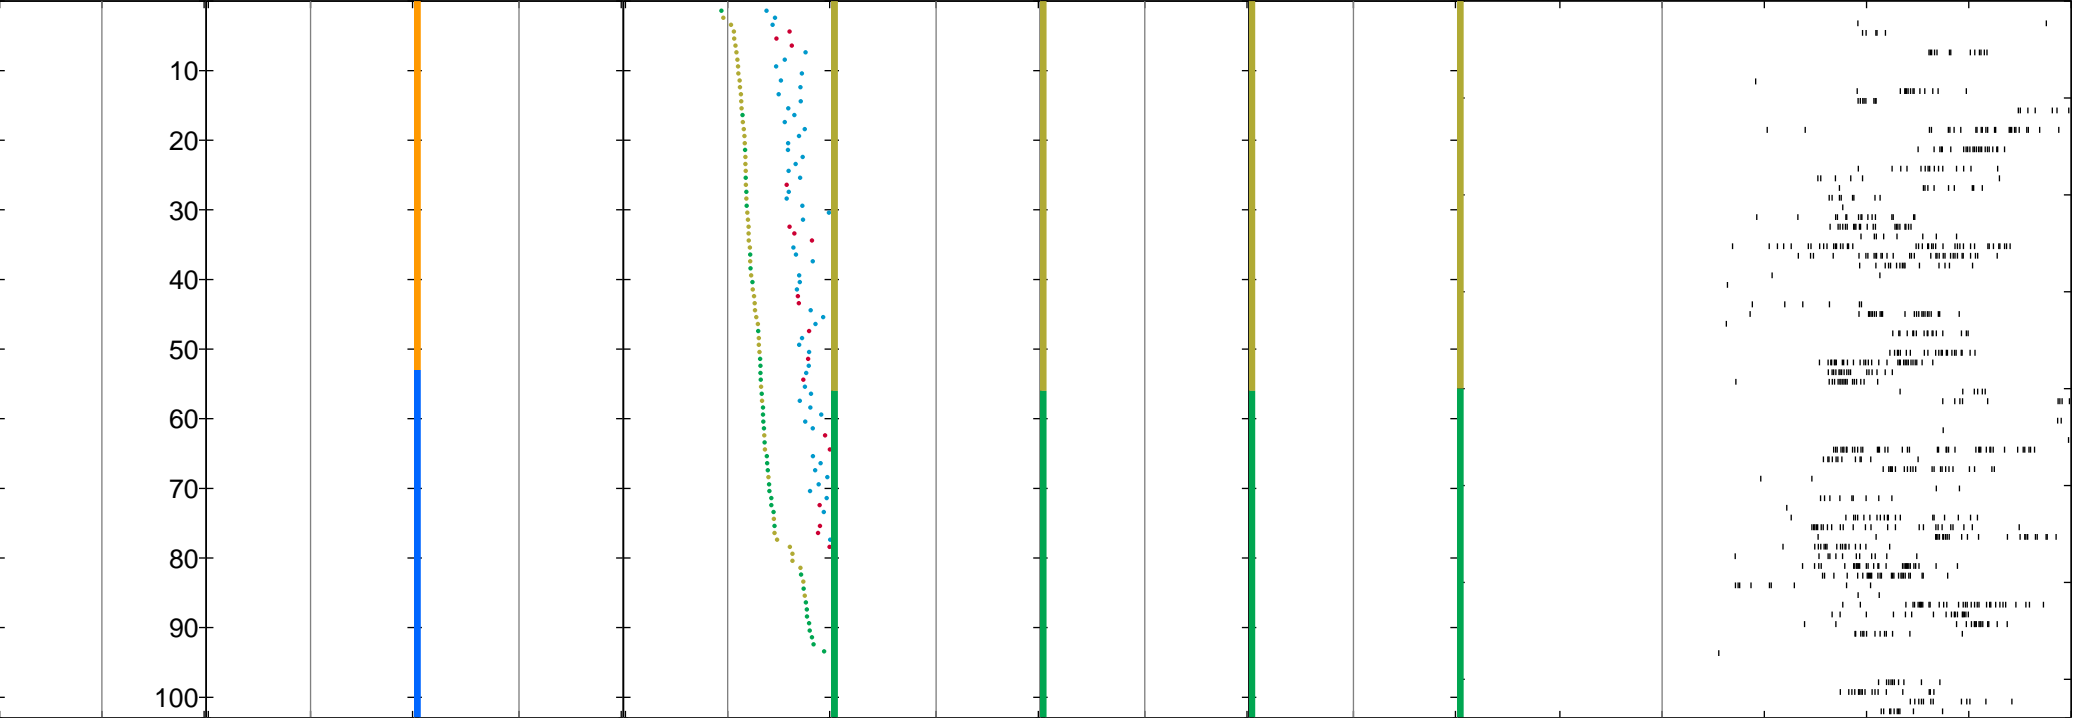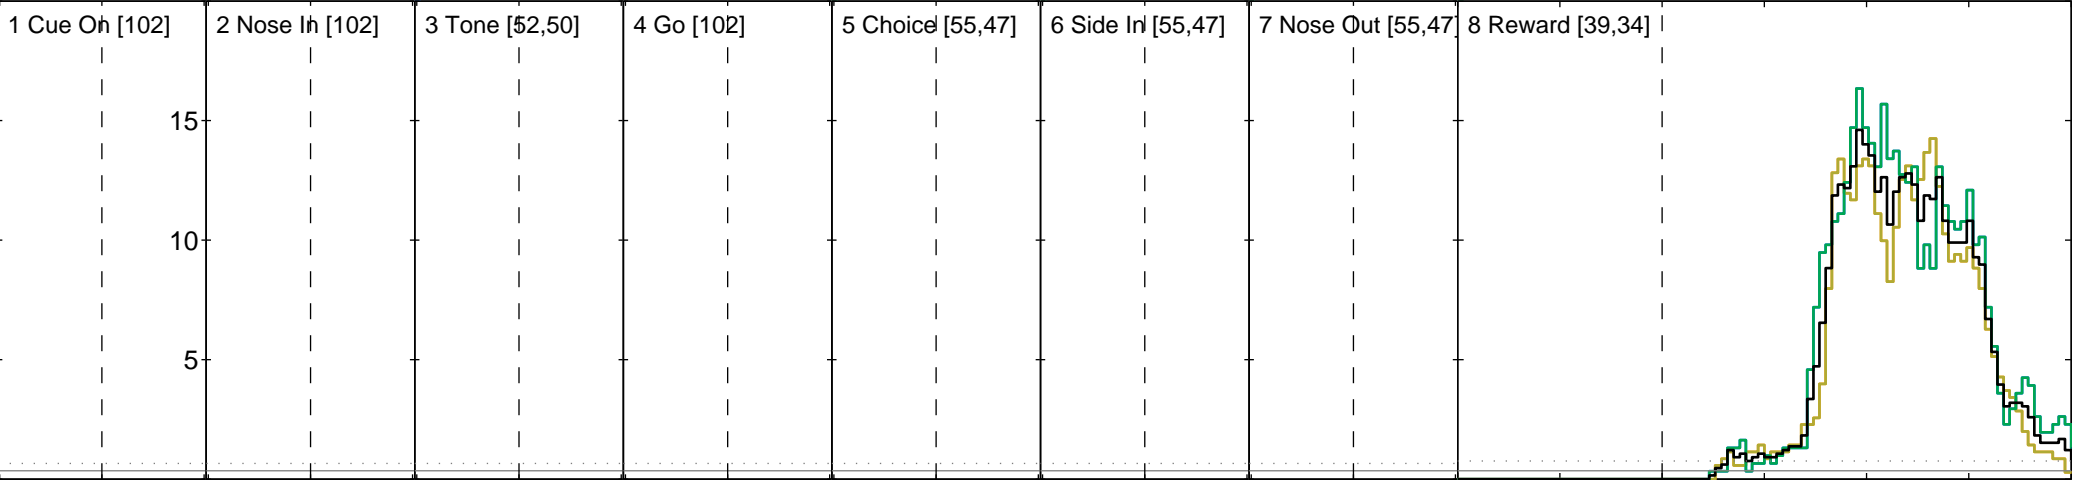

**Cell: C0320070702T07a**

AP: 0.96 ML: 3.6 DV: 7.8

w: 2 n: 2407  $P_{ISI>2}$ : 0.9

1/2pw: 314 $\mu$ s p->v: 1086 $\mu$ s

$\beta_T$ : NaN  $\beta_D$ : NaN

$\beta_P$ : NaN SI: NaN

Session FR: 0.48 Hz

Pk Ev: 8 - Reward (T1/Con)

Pk FR: 9.07Hz (1.01s) **MSN**

Waveform

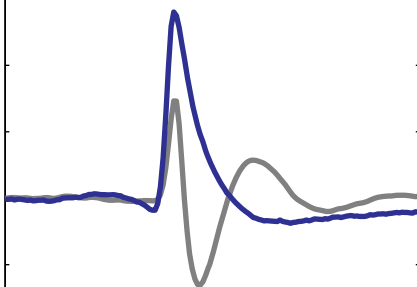

HP/PV

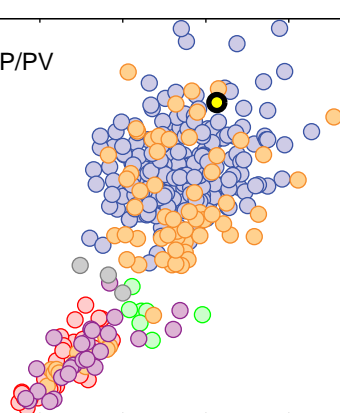

FR/PV

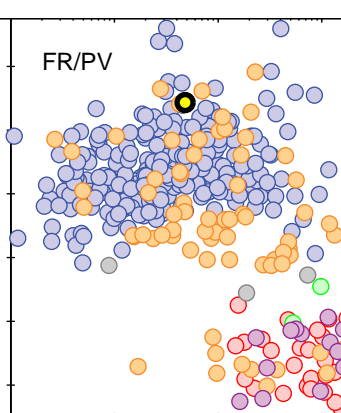

ISI Histogram [55]

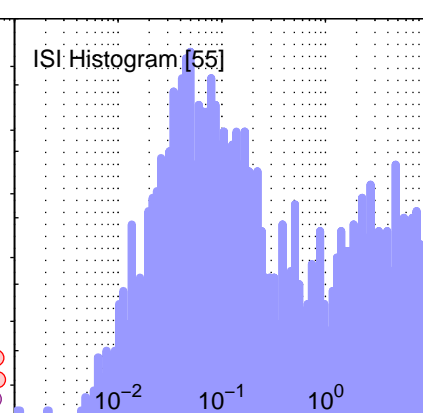

20

40

60

80

100

120

1 Cue On [135]

2 Nose In [135]

3 Tone [71,64]

4 Go [135]

5 Choice [73,62]

6 Side In [73,62]

7 Nose Out [73,62]

8 Reward [60,51]

8

6

4

2

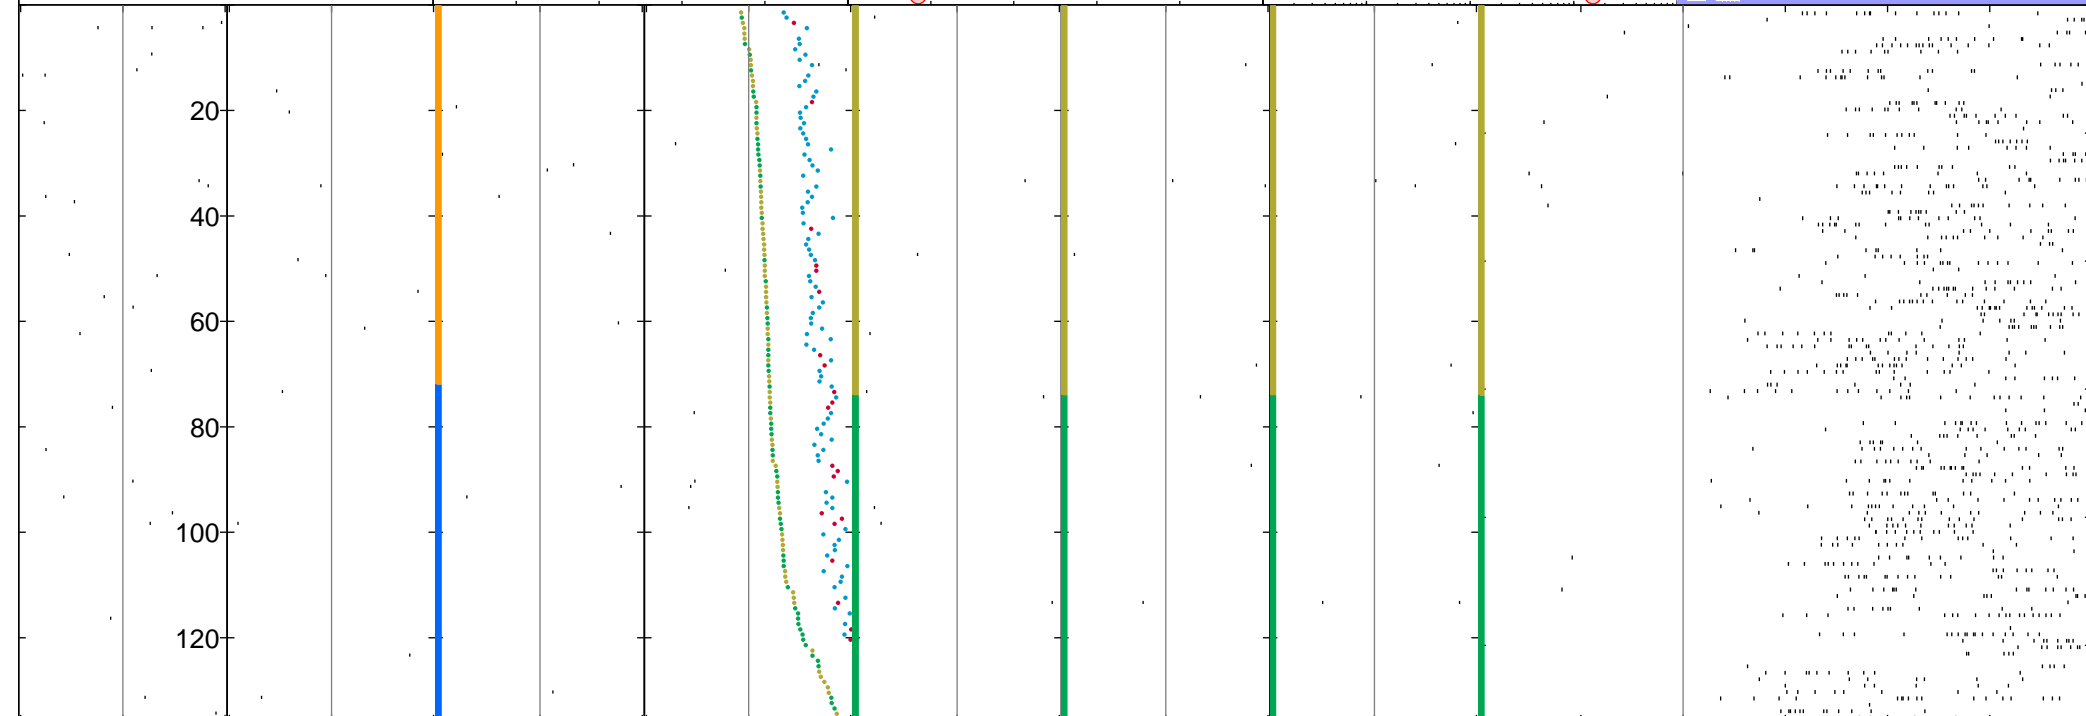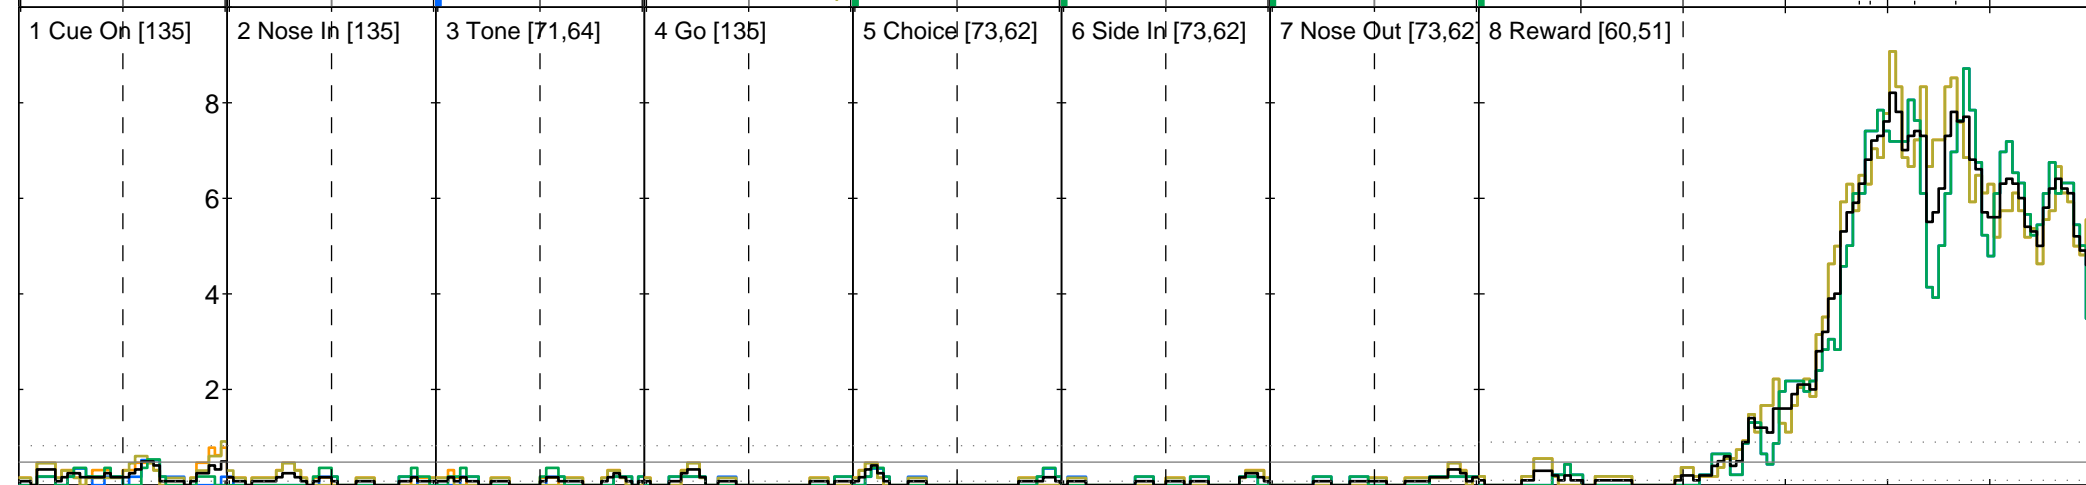

Cell: C0320070619T07a

AP: 0.96 ML: 3.6 DV: 5.8

w: 2 n: 12665  $P_{ISI>2}$ : 0.32

1/2pw: 242 $\mu$ s p $\rightarrow$ v: 835 $\mu$ s

$\beta_T$ : 2.1  $\beta_D$ : -2

$\beta_P$ : -3.5 SI: NaN

Session FR: 2.99 Hz

Pk Ev: 8 - Reward (T1/Con)

Pk FR: 10.8Hz (1.04s) **MSN**

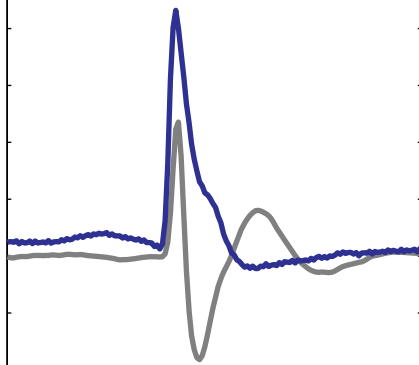

HP/PV

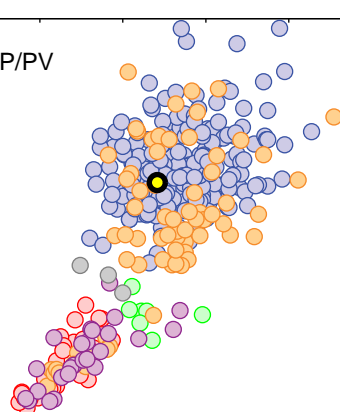

FR/PV

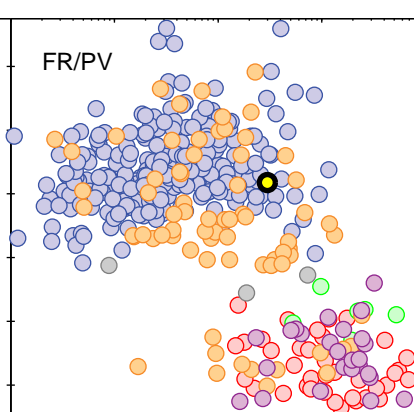

ISI Histogram [323]

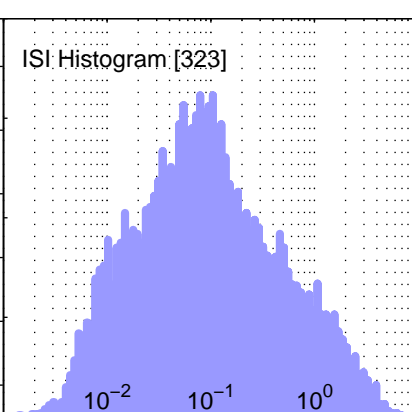

10  
20  
30  
40  
50  
60  
70  
80  
90

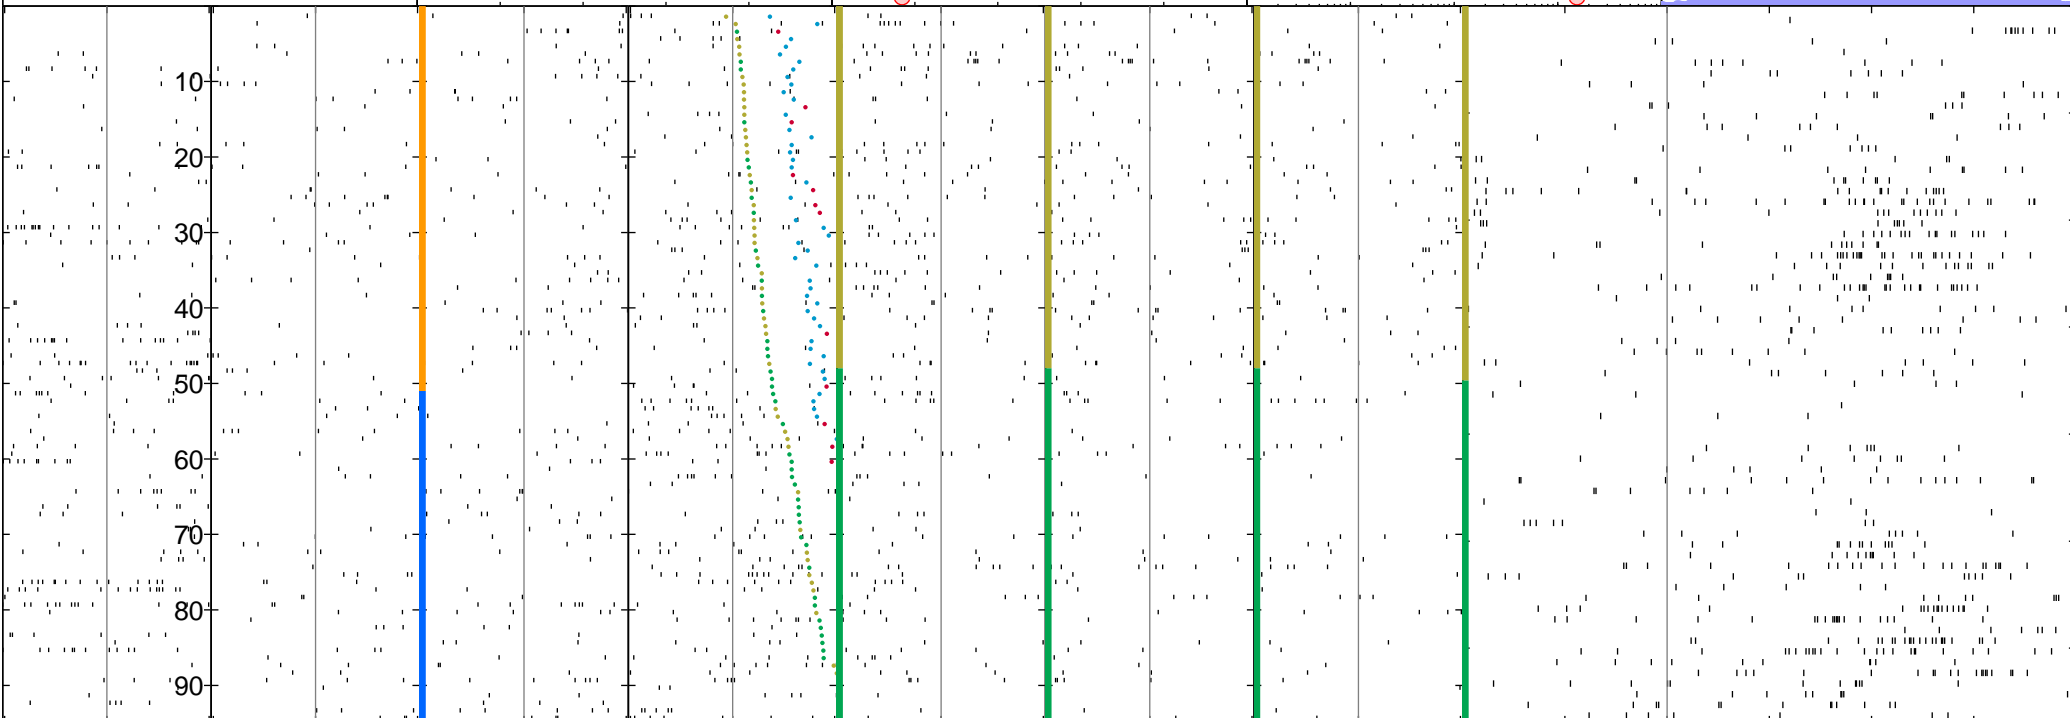

1 Cue On [94]

2 Nose In [94]

3 Tone [50,44]

4 Go [94]

5 Choice [47,47]

6 Side In [47,47]

7 Nose Out [47,47]

8 Reward [34,32]

10

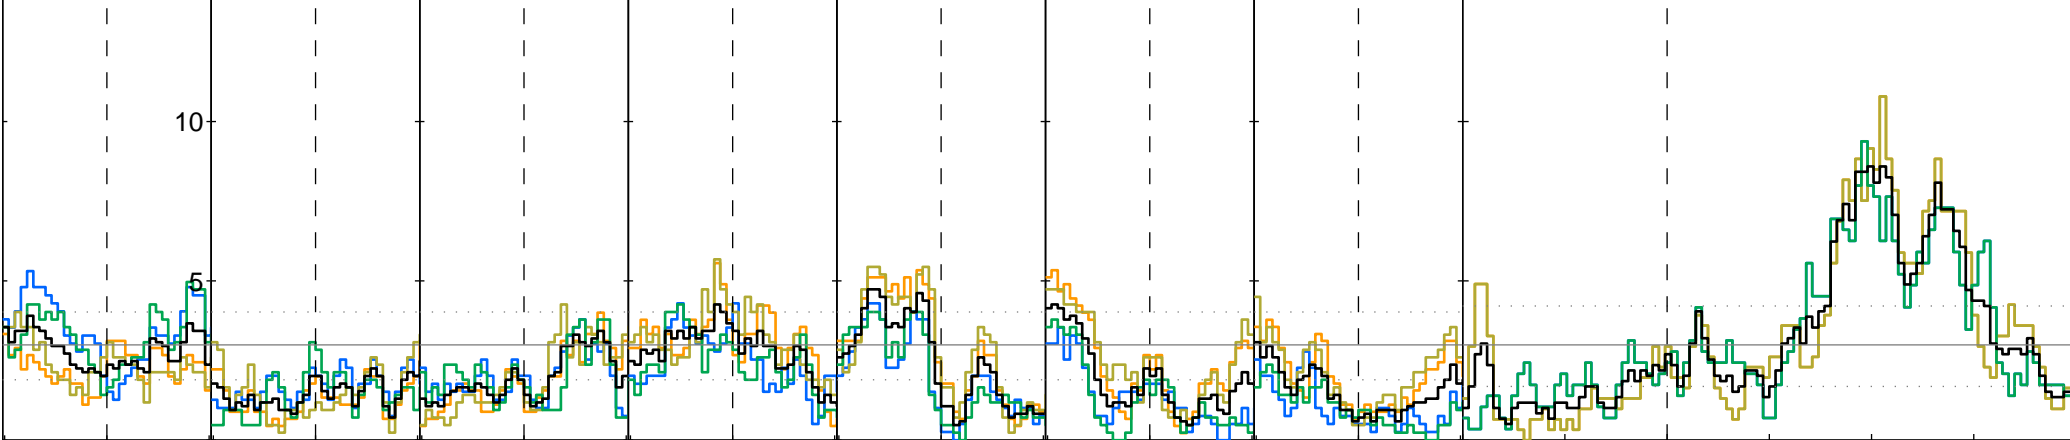

**Cell: C0320070630T07a**

AP: 0.96 ML: 3.6 DV: 7.5

w: 3 n: 2605  $P_{ISI>2}$ : 0.791/2pw: 253 $\mu$ s p->v: 861 $\mu$ s $\beta_T$ : NaN  $\beta_D$ : NaN $\beta_P$ : NaN SI: NaN

Session FR: 0.858 Hz

Pk Ev: 8 - Reward (T2/Ipsi)

Pk FR: 11.7Hz (1.04s) **MSN**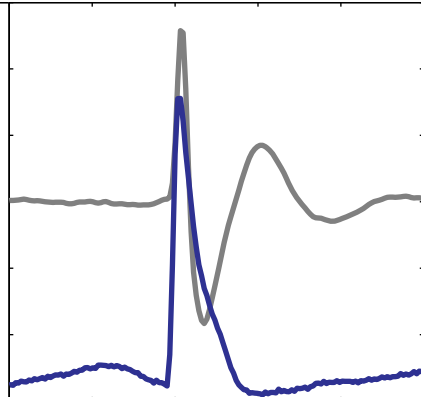

HP/PV

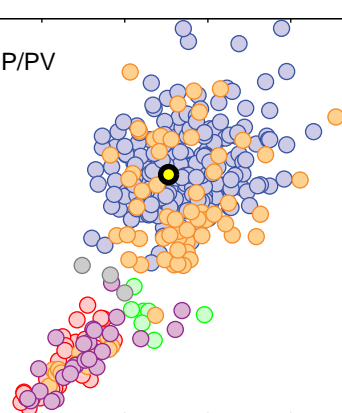

FR/PV

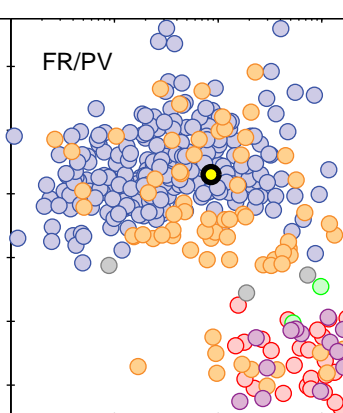

ISI Histogram [65]

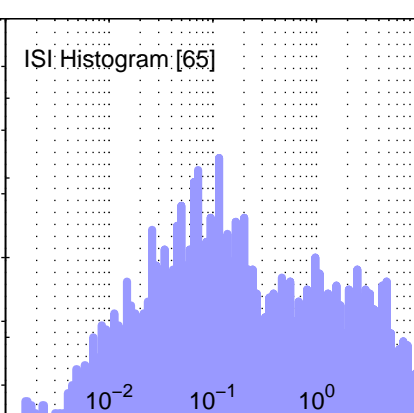

10

20

30

40

50

60

70

80

1 Cue On [82]

2 Nose In [82]

3 Tone [38,44]

4 Go [82]

5 Choice [35,47]

6 Side In [35,47]

7 Nose Out [35,47]

8 Reward [26,35]

10

5

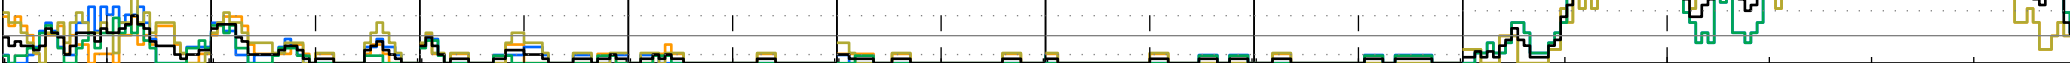

**Cell: C0320070624T11e**

AP: -0.96 ML: 3.7 DV: 6.1  
w: 2 n: 1467  $P_{ISI>2}$ : 0.93  
1/2pw: 264 $\mu$ s p->v: 827 $\mu$ s  
 $\beta_T$ : NaN  $\beta_D$ : NaN  
 $\beta_P$ : NaN SI: NaN  
Session FR: 0.396 Hz  
Pk Ev: 8 - Reward (T1/Con)  
Pk FR: 8.44Hz (1.16s) **MSN**

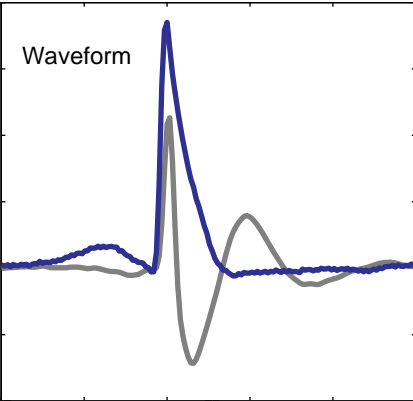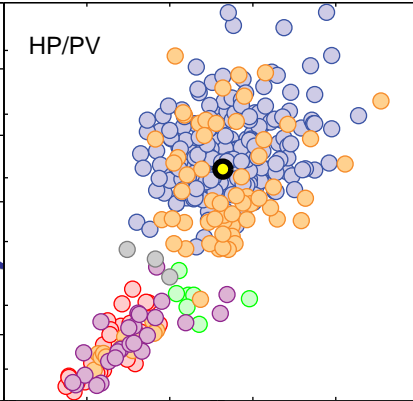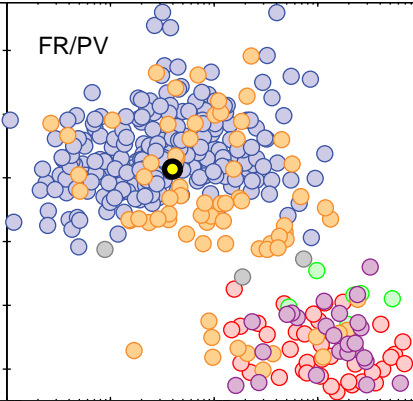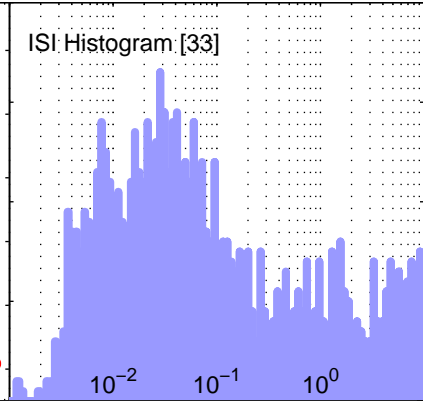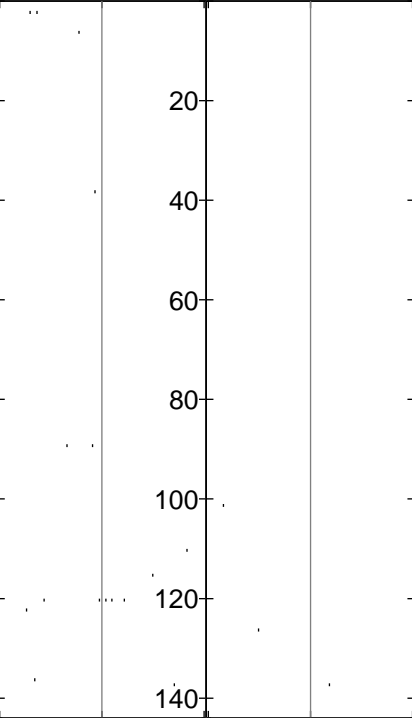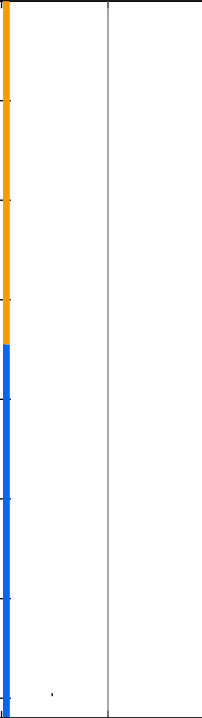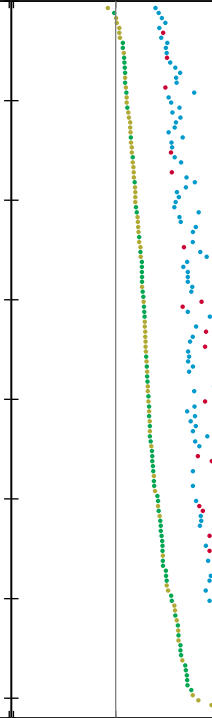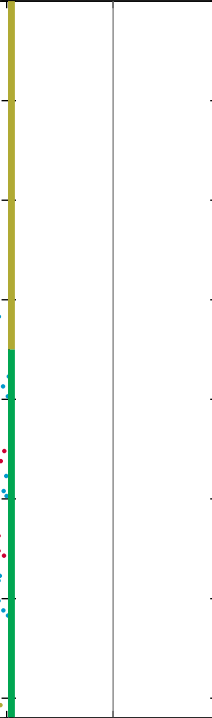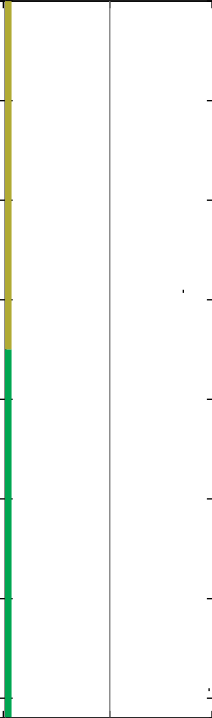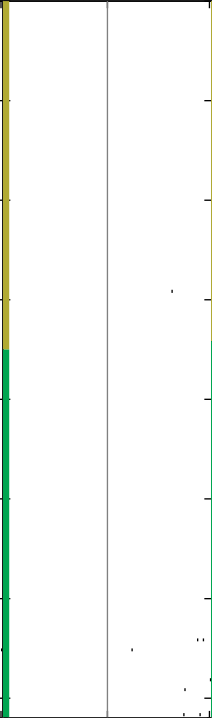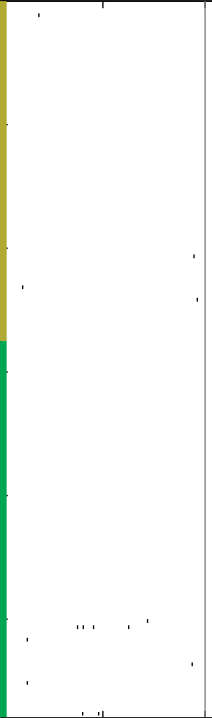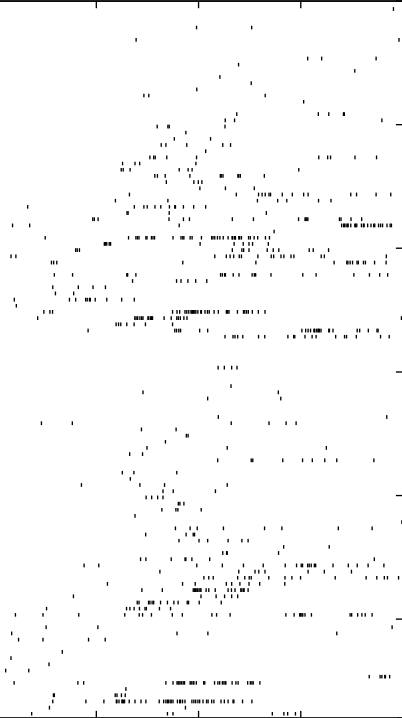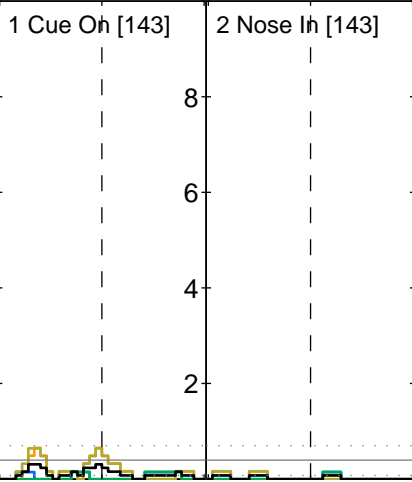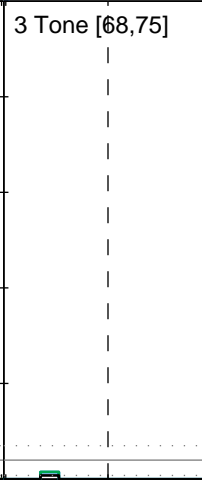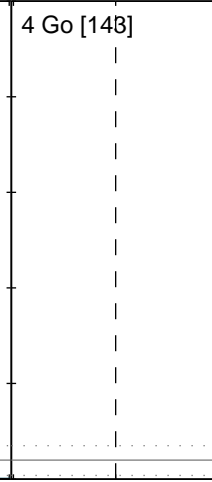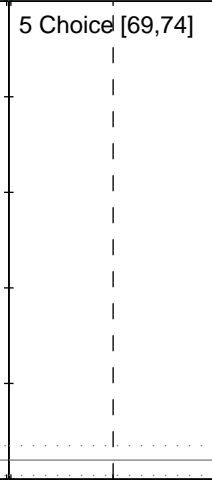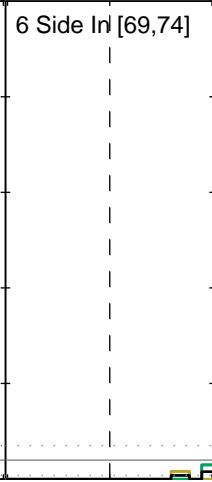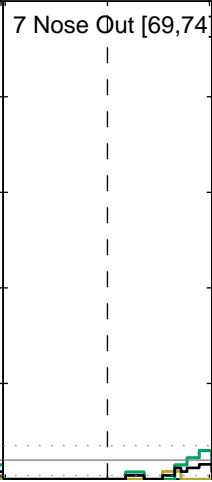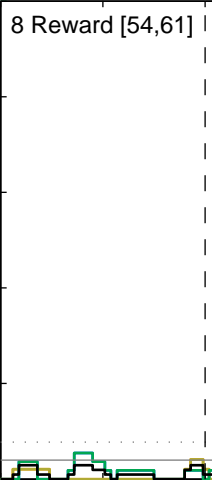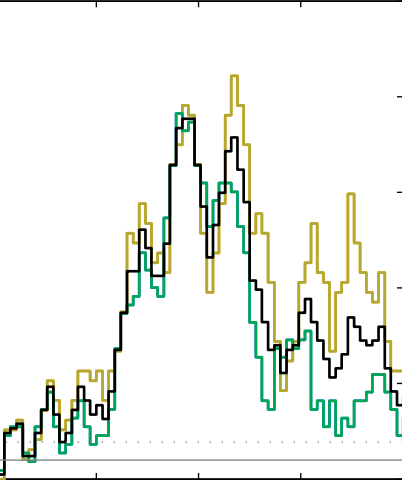



**Cell: C0320070625T11a**  
 AP: -0.96 ML: 3.7 DV: 6.2  
 w: 3 n: 729  $P_{ISI>2}$ : 0.97  
 1/2pw: 307 $\mu$ s p->v: 1005 $\mu$ s  
 $\beta_T$ : NaN  $\beta_D$ : NaN  
 $\beta_P$ : NaN SI: NaN  
 Session FR: 0.262 Hz  
**Pk Ev: 8 - Reward (T1/Con)**  
**Pk FR: 5.36Hz (1.22s) MSN**

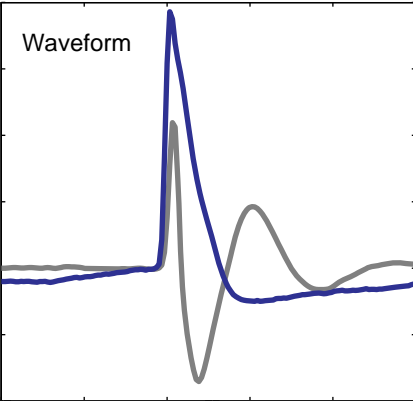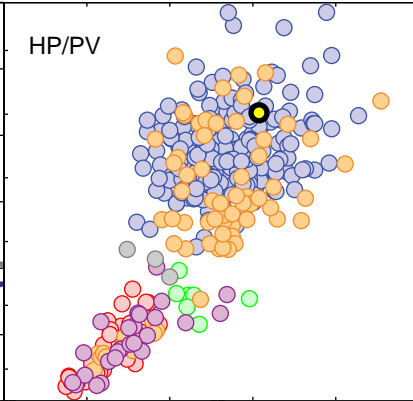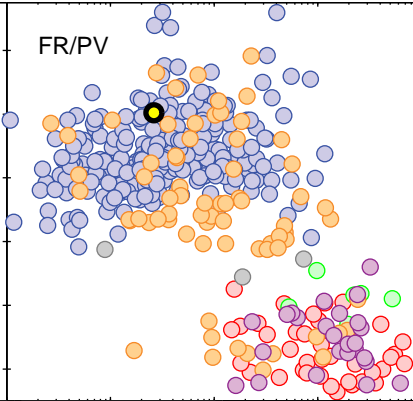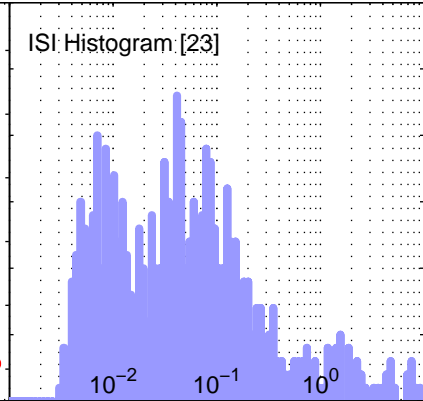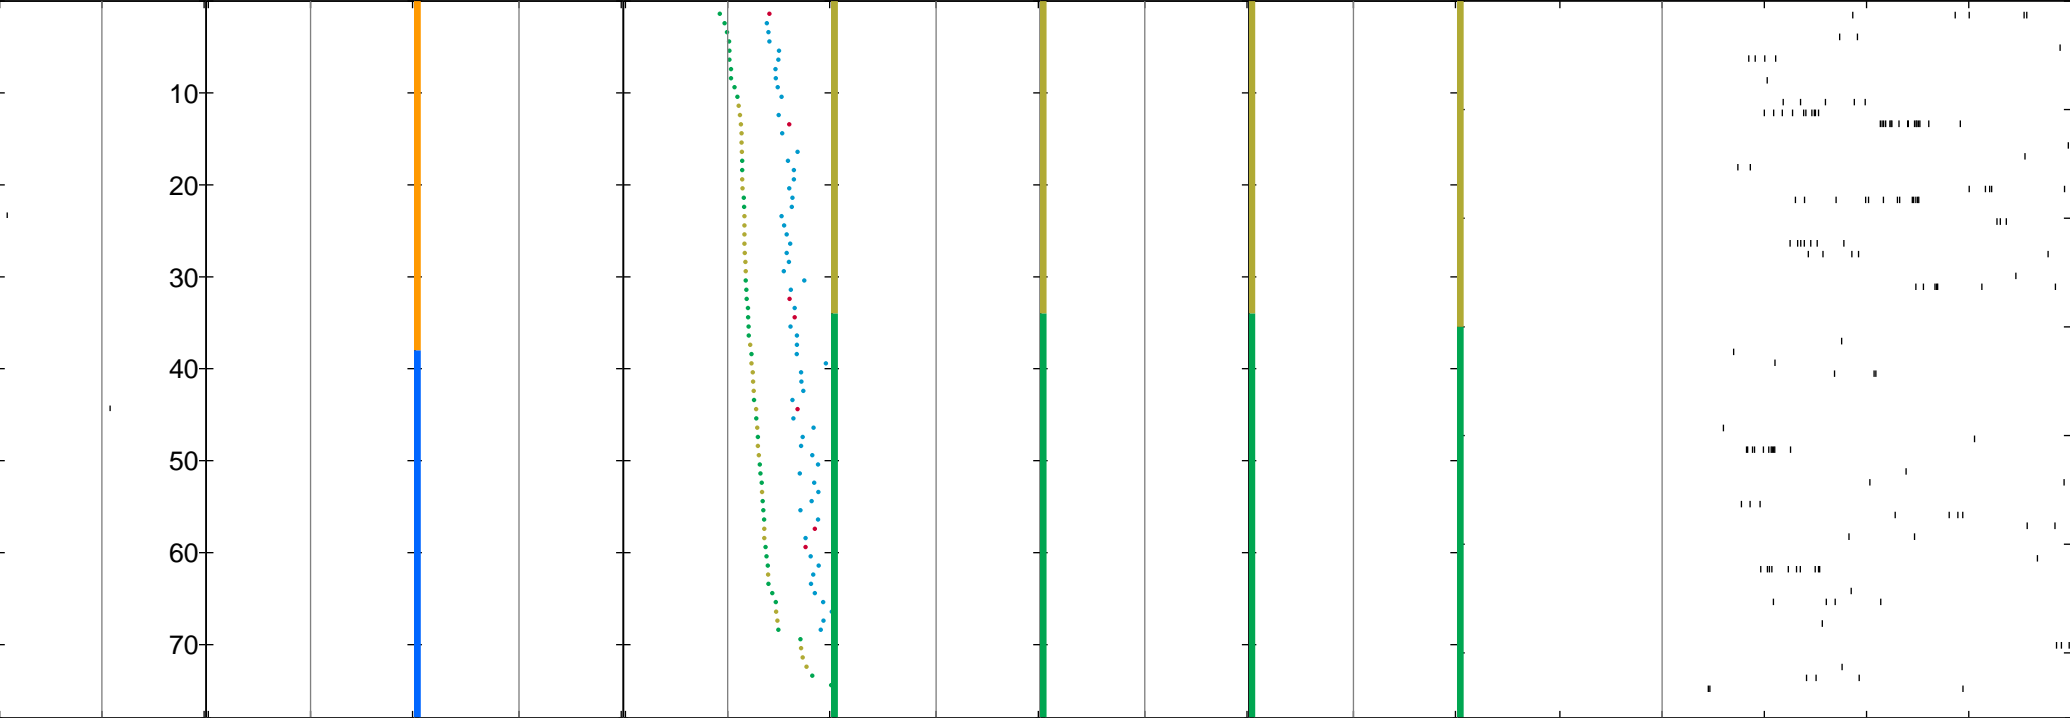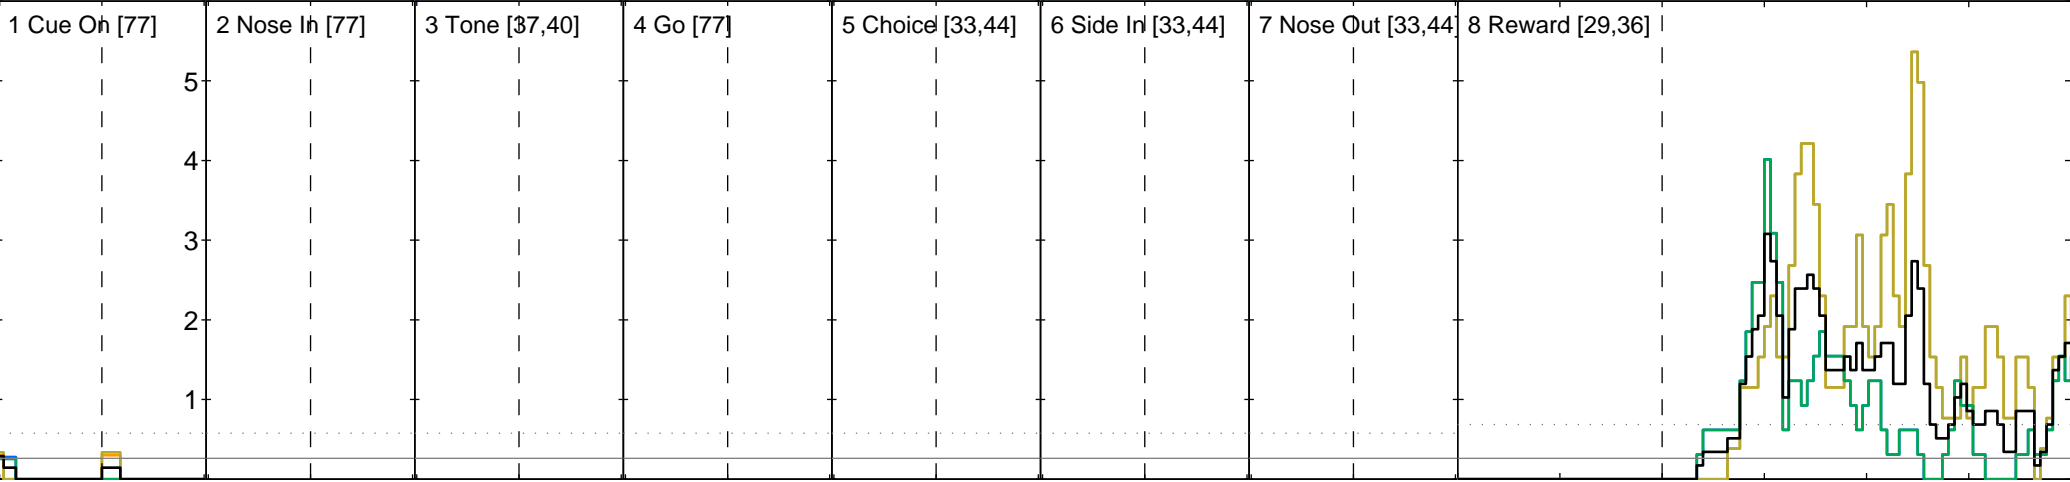

**Cell: C0320070622T09b**

AP: 1.6 ML: 3.7 DV: 5.2  
w: 3 n: 12278  $P_{ISI>2}$ : 0.51  
1/2pw: 338 $\mu$ s p->v: 925 $\mu$ s  
 $\beta_T$ : NaN  $\beta_D$ : NaN  
 $\beta_P$ : NaN SI: NaN  
Session FR: 3.1 Hz  
Pk Ev: 8 - Reward (T1/Con)  
Pk FR: 8.62Hz (1.82s) **MSN**

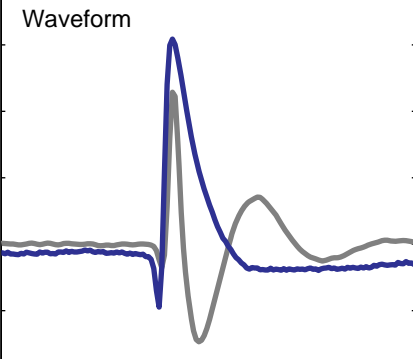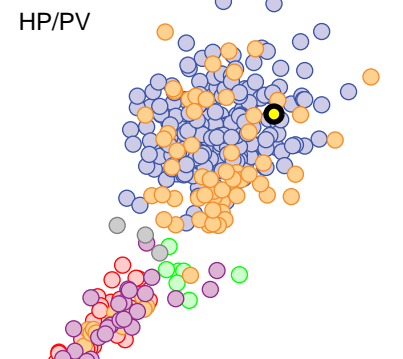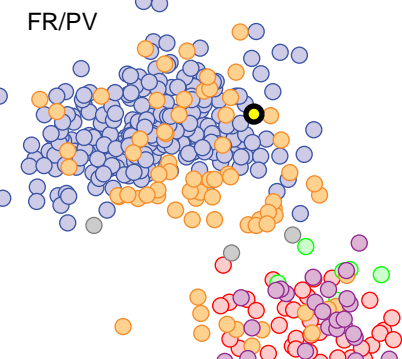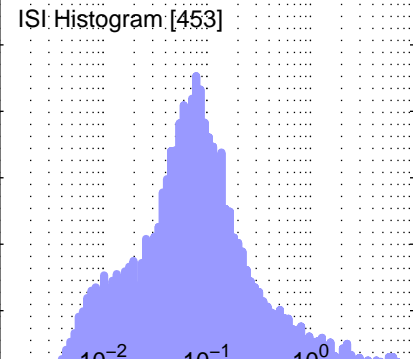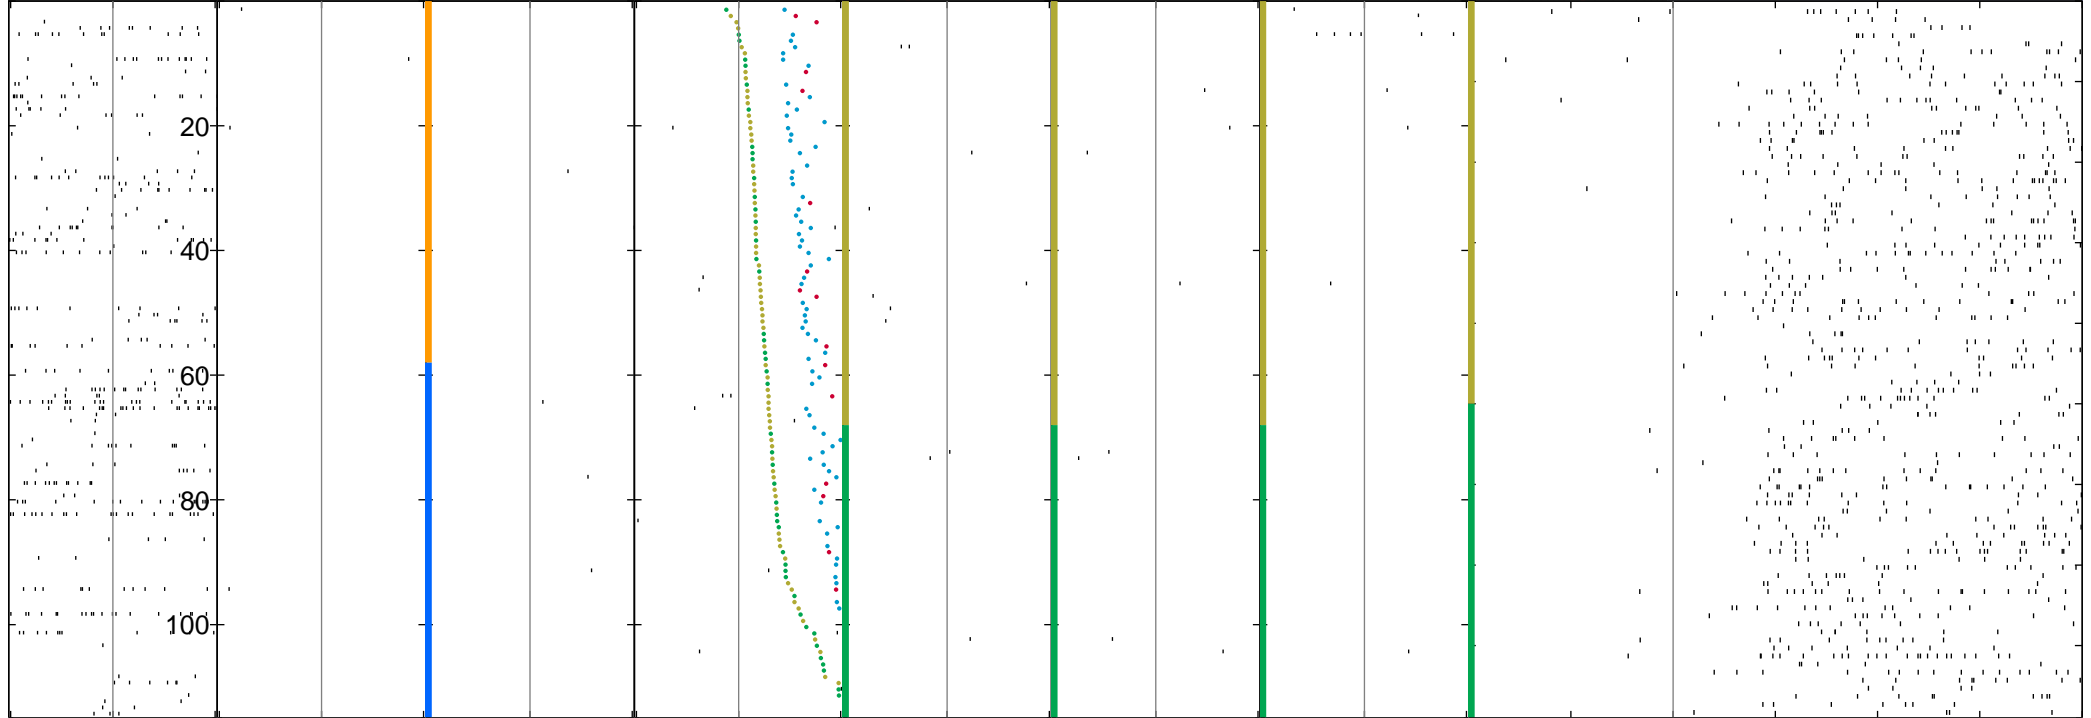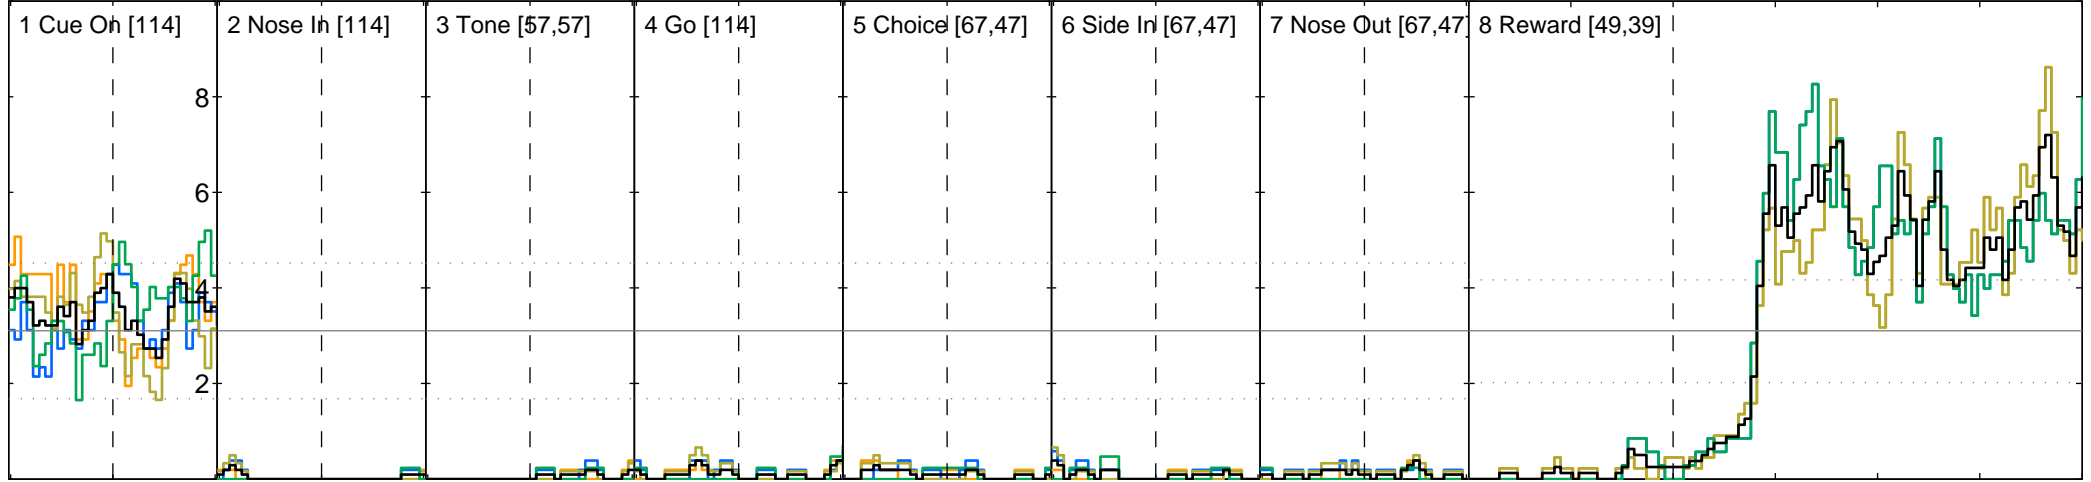

Cell: C1220071022T11a

AP: -2.8 ML: 4.2 DV: 6.6

w: 2 n: 5382  $P_{ISI>2}$ : 0.89

1/2pw: 323 $\mu$ s p->v: 1131 $\mu$ s

$\beta_T$ : NaN  $\beta_D$ : NaN

$\beta_P$ : NaN SI: NaN

Session FR: 0.936 Hz

Pk Ev: 8 - Reward (T1/Con)

Pk FR: 13.3Hz (1.97s) MSN

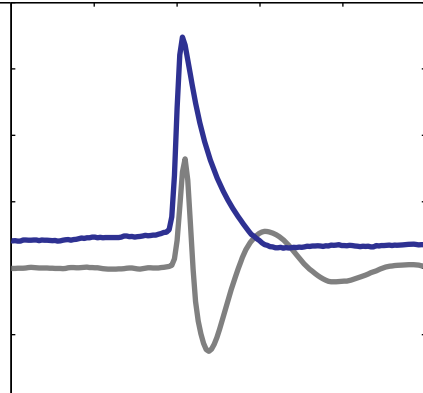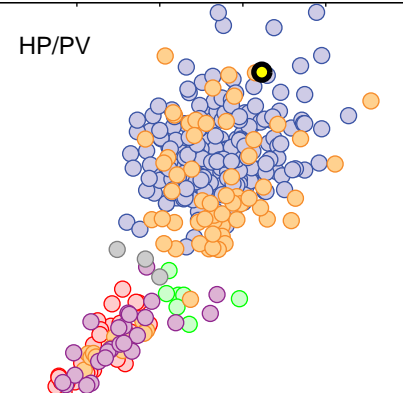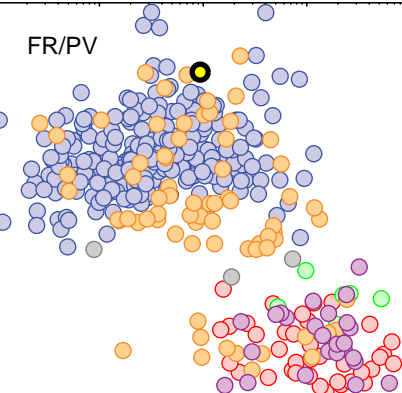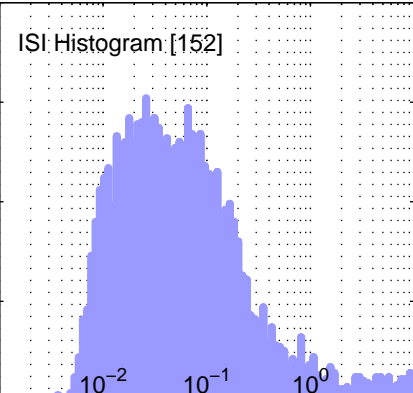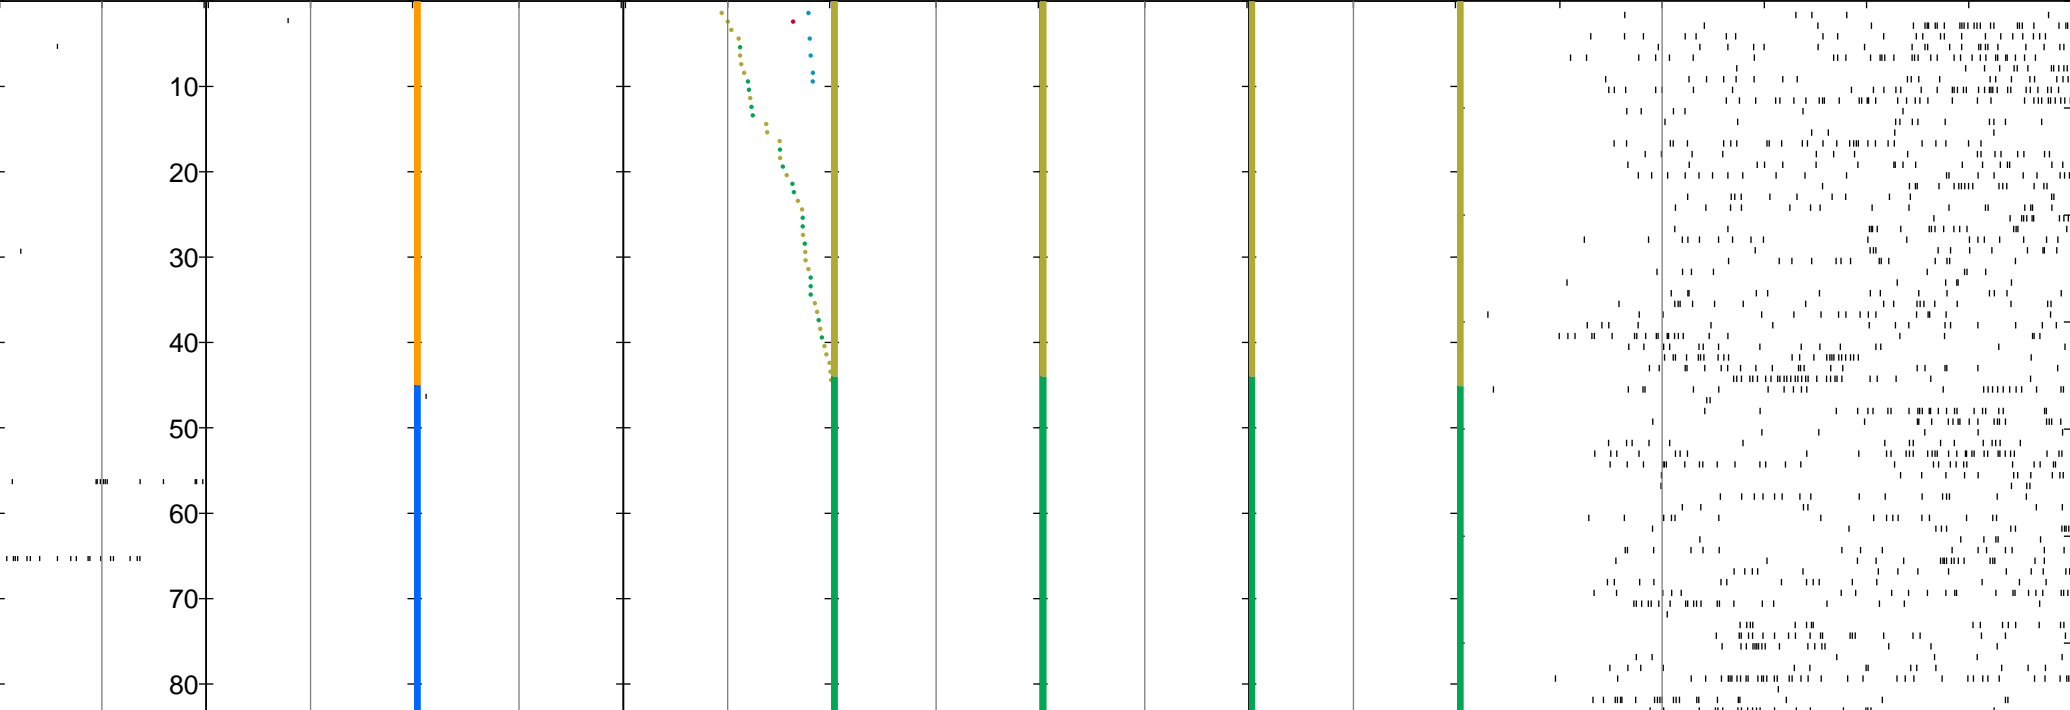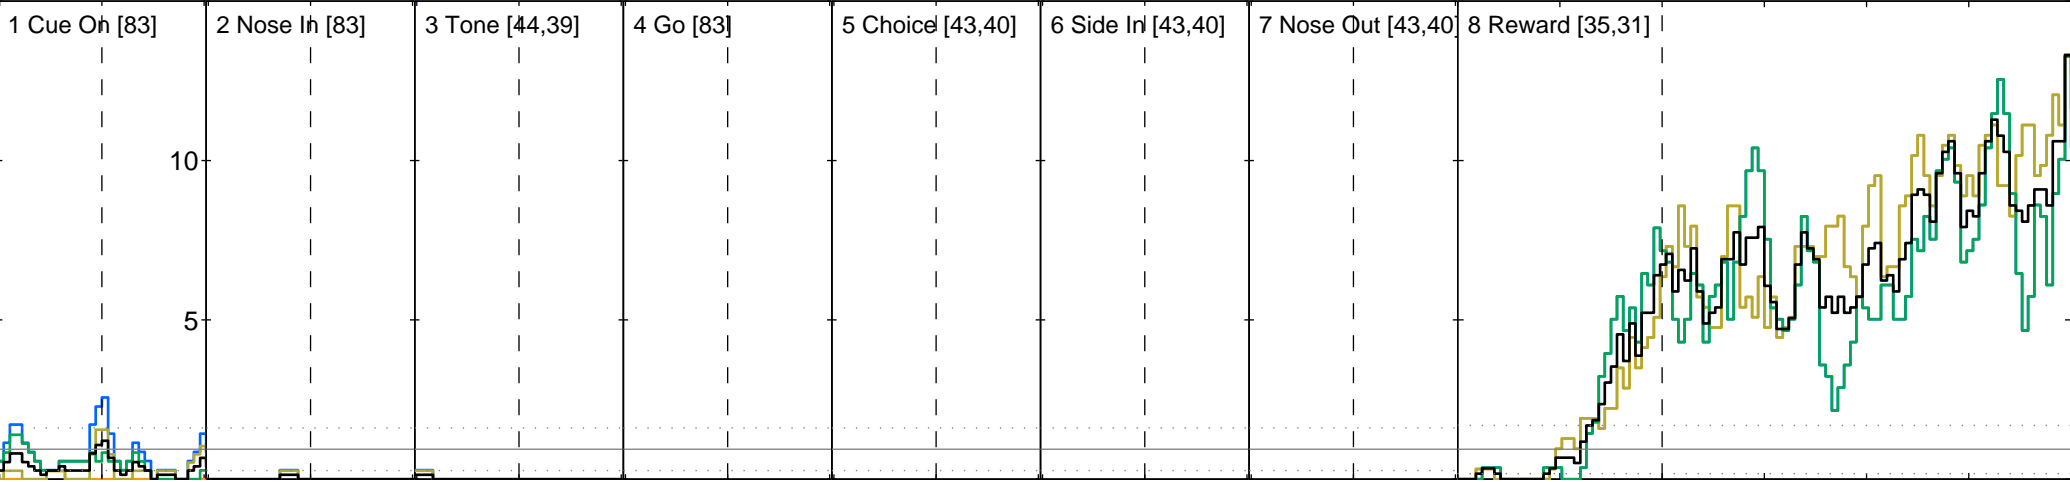

**Cell: C0320070611T07b**

AP: 0.96 ML: 3.6 DV: 5.1

w: 2 n: 300  $P_{ISI>2}$ : 0.99

1/2pw: 266 $\mu$ s p->v: 669 $\mu$ s

$\beta_T$ : NaN  $\beta_D$ : NaN

$\beta_P$ : NaN SI: NaN

Session FR: 0.04 Hz

Pk Ev: None

Pk FR: --

MSN

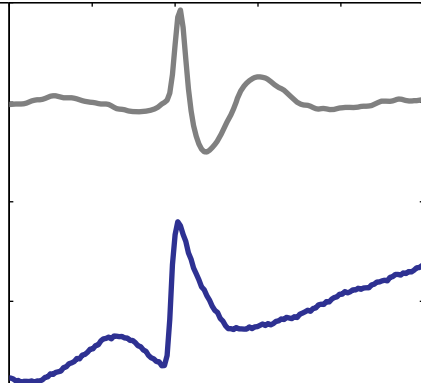

HP/PV

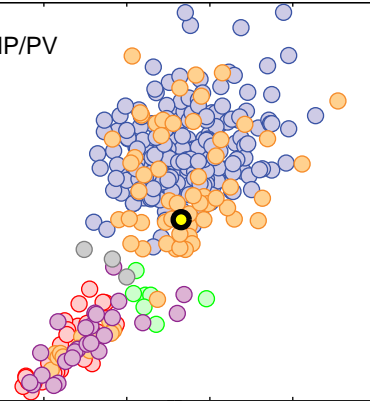

FR/PV

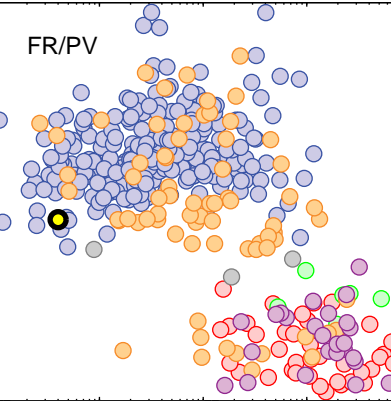

ISI Histogram [10]

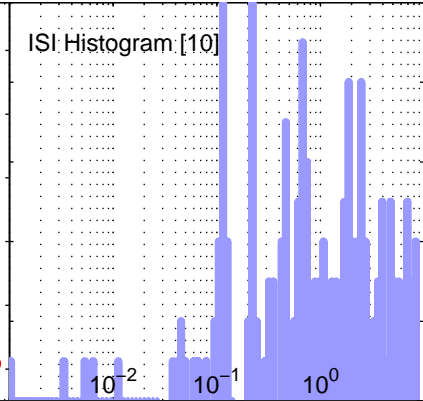

10  
20  
30  
40  
50  
60  
70  
80

1 Cue On [85] 2 Nose In [85] 3 Tone [50,35] 4 Go [85] 5 Choice [39,46] 6 Side In [39,46] 7 Nose Out [39,46] 8 Reward [33,29]

5  
4  
3  
2  
1

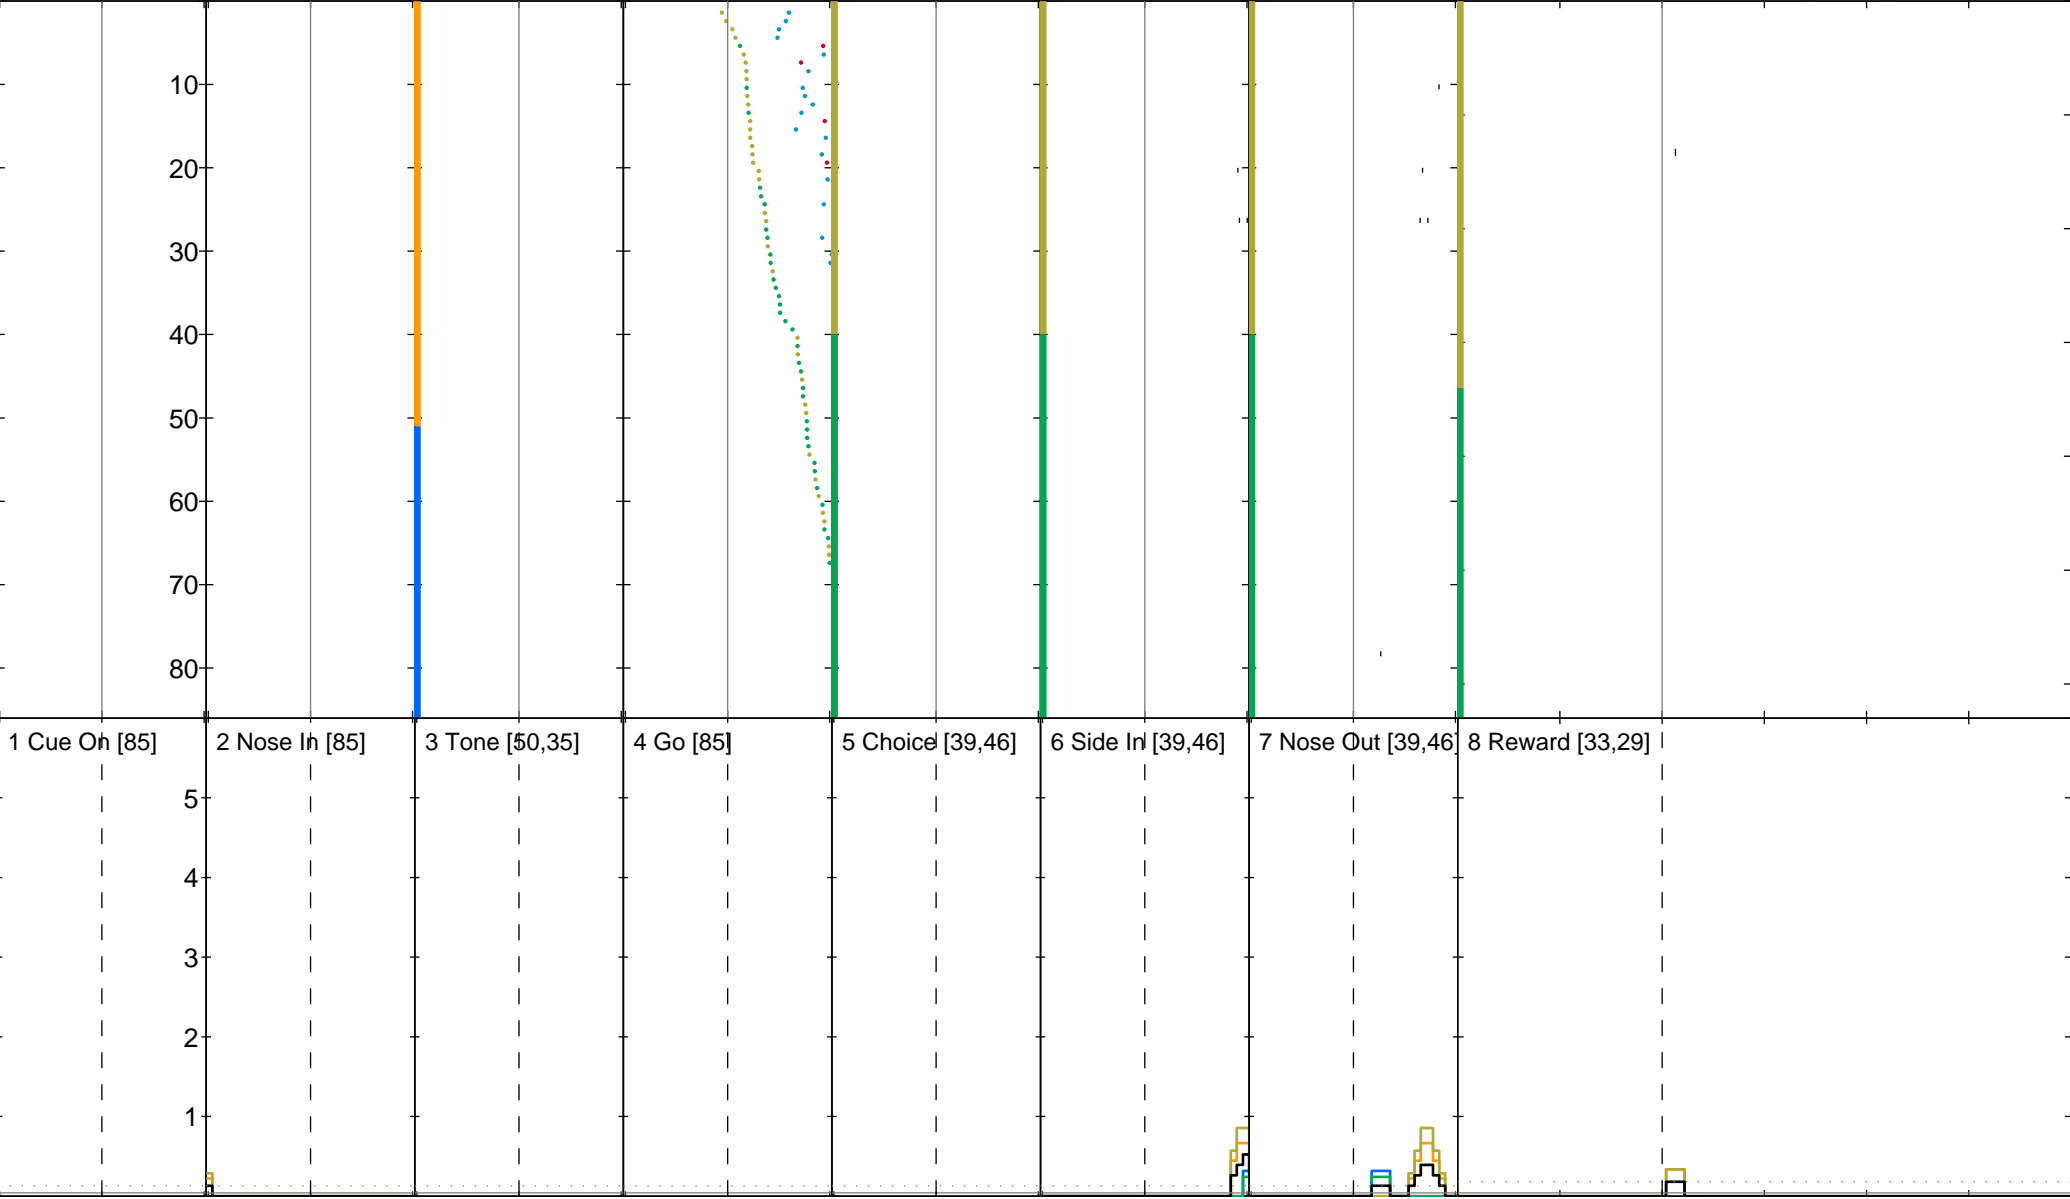

**Cell: C0320070611T07d**

AP: 0.96 ML: 3.6 DV: 5.1  
w: 3 n: 426  $P_{ISI>2}$ : 0.99  
1/2pw: 270 $\mu$ s p->v: 827 $\mu$ s  
 $\beta_T$ : NaN  $\beta_D$ : NaN  
 $\beta_P$ : NaN SI: NaN  
Session FR: 0.0568 Hz  
Pk Ev: None  
Pk FR: --

MSN

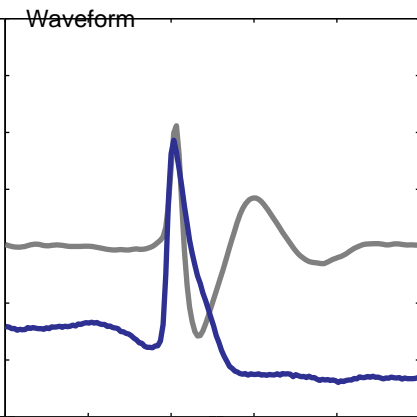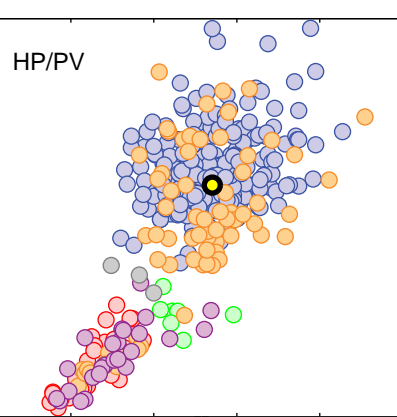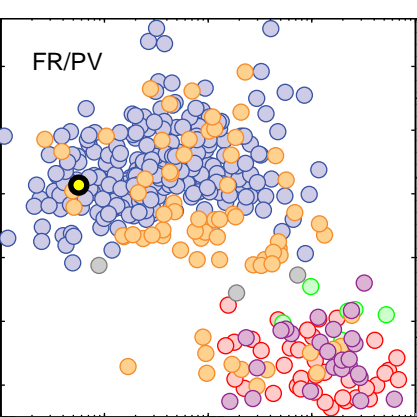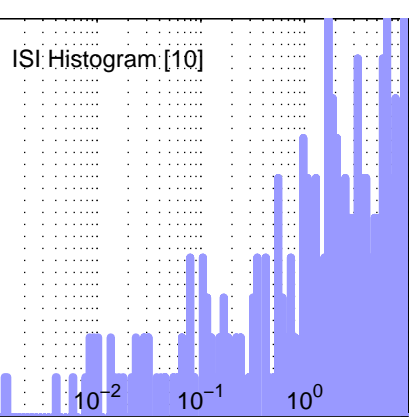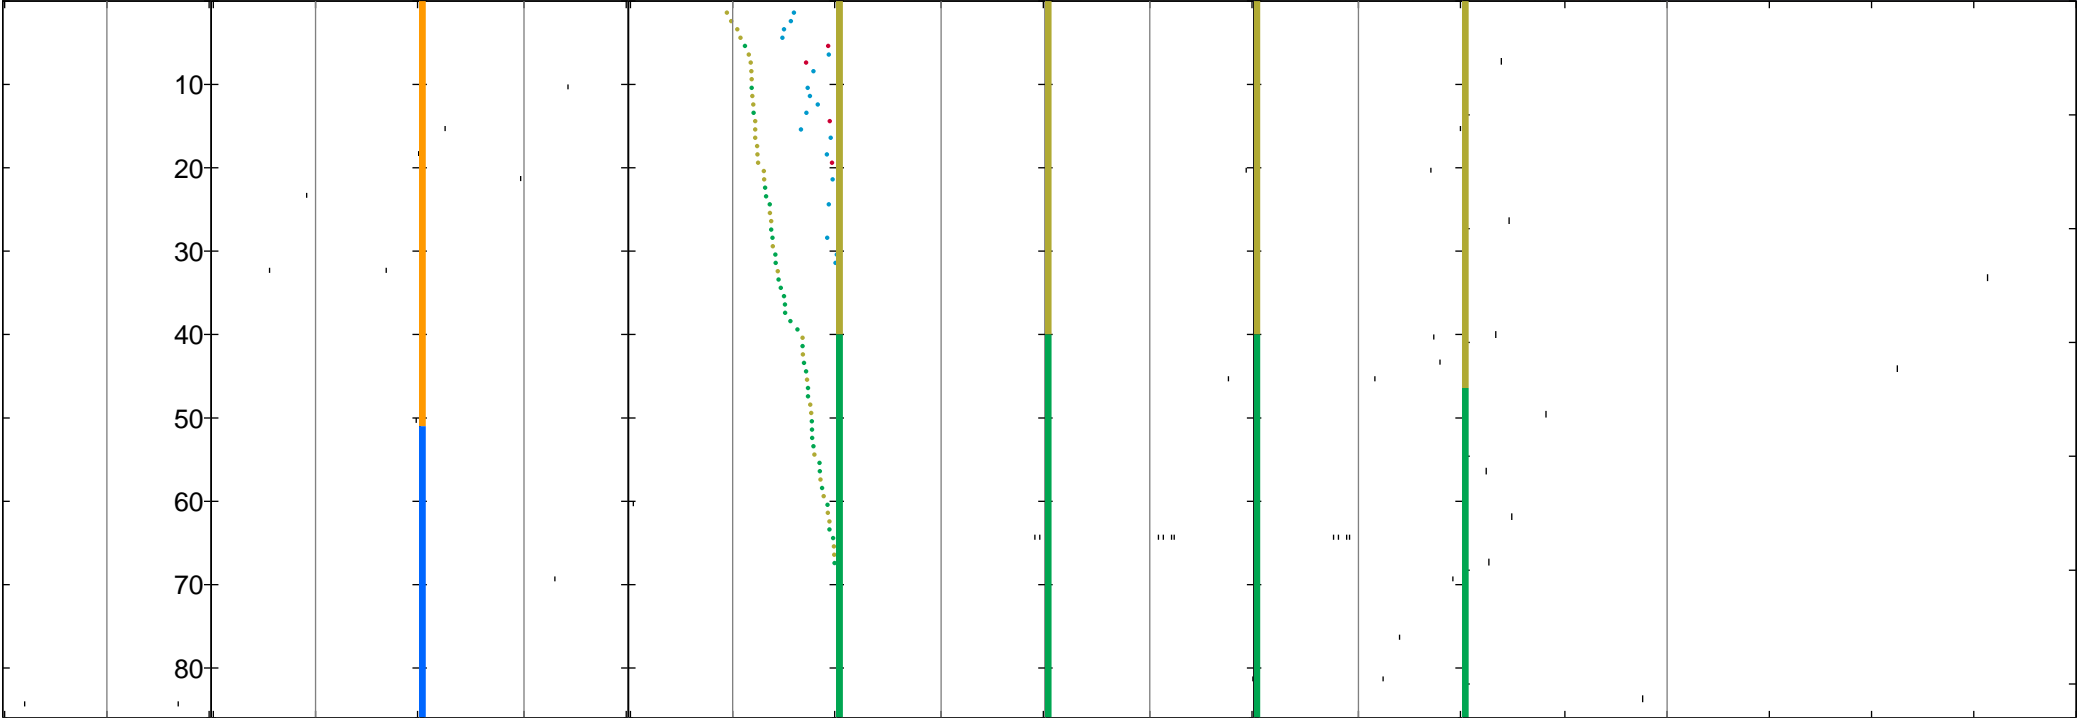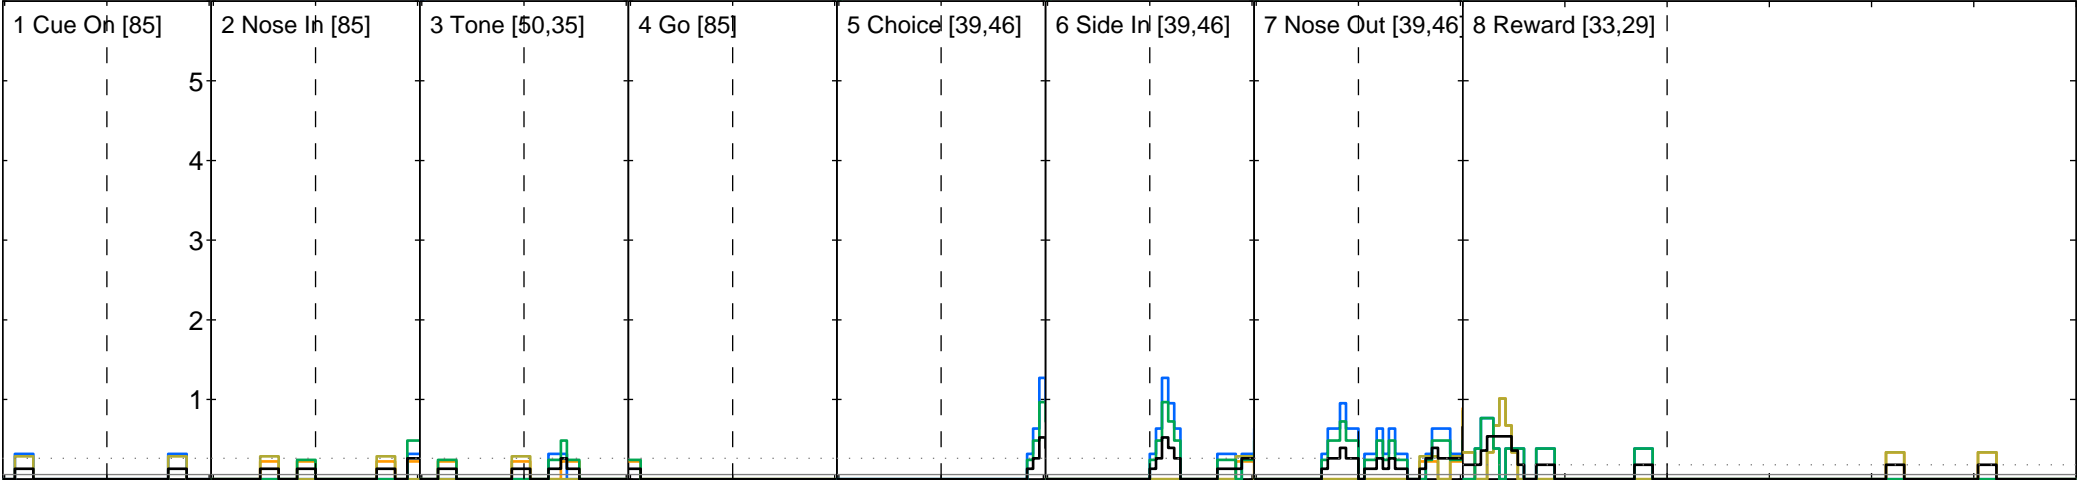

**Cell: C0320070611T07e**

AP: 0.96 ML: 3.6 DV: 5.1  
w: 3 n: 549  $P_{ISI>2}$ : 0.99  
1/2pw: 266 $\mu$ s p->v: 830 $\mu$ s  
 $\beta_T$ : NaN  $\beta_D$ : NaN  
 $\beta_P$ : NaN SI: NaN  
Session FR: 0.0736 Hz  
Pk Ev: None  
Pk FR: --

Waveform

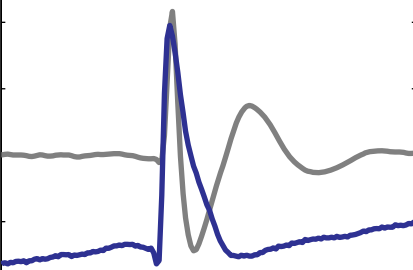

HP/PV

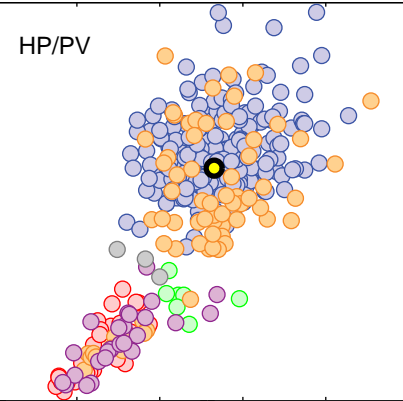

FR/PV

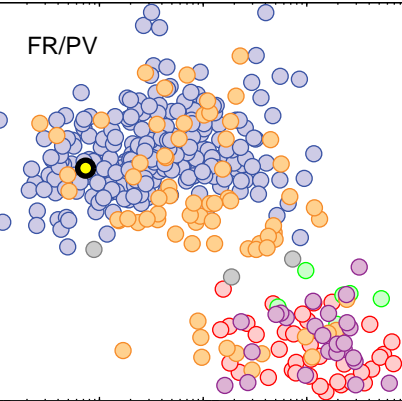

ISI Histogram [11]

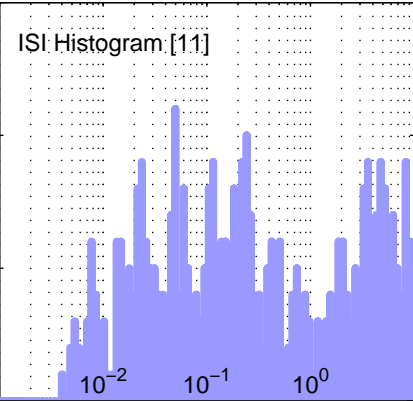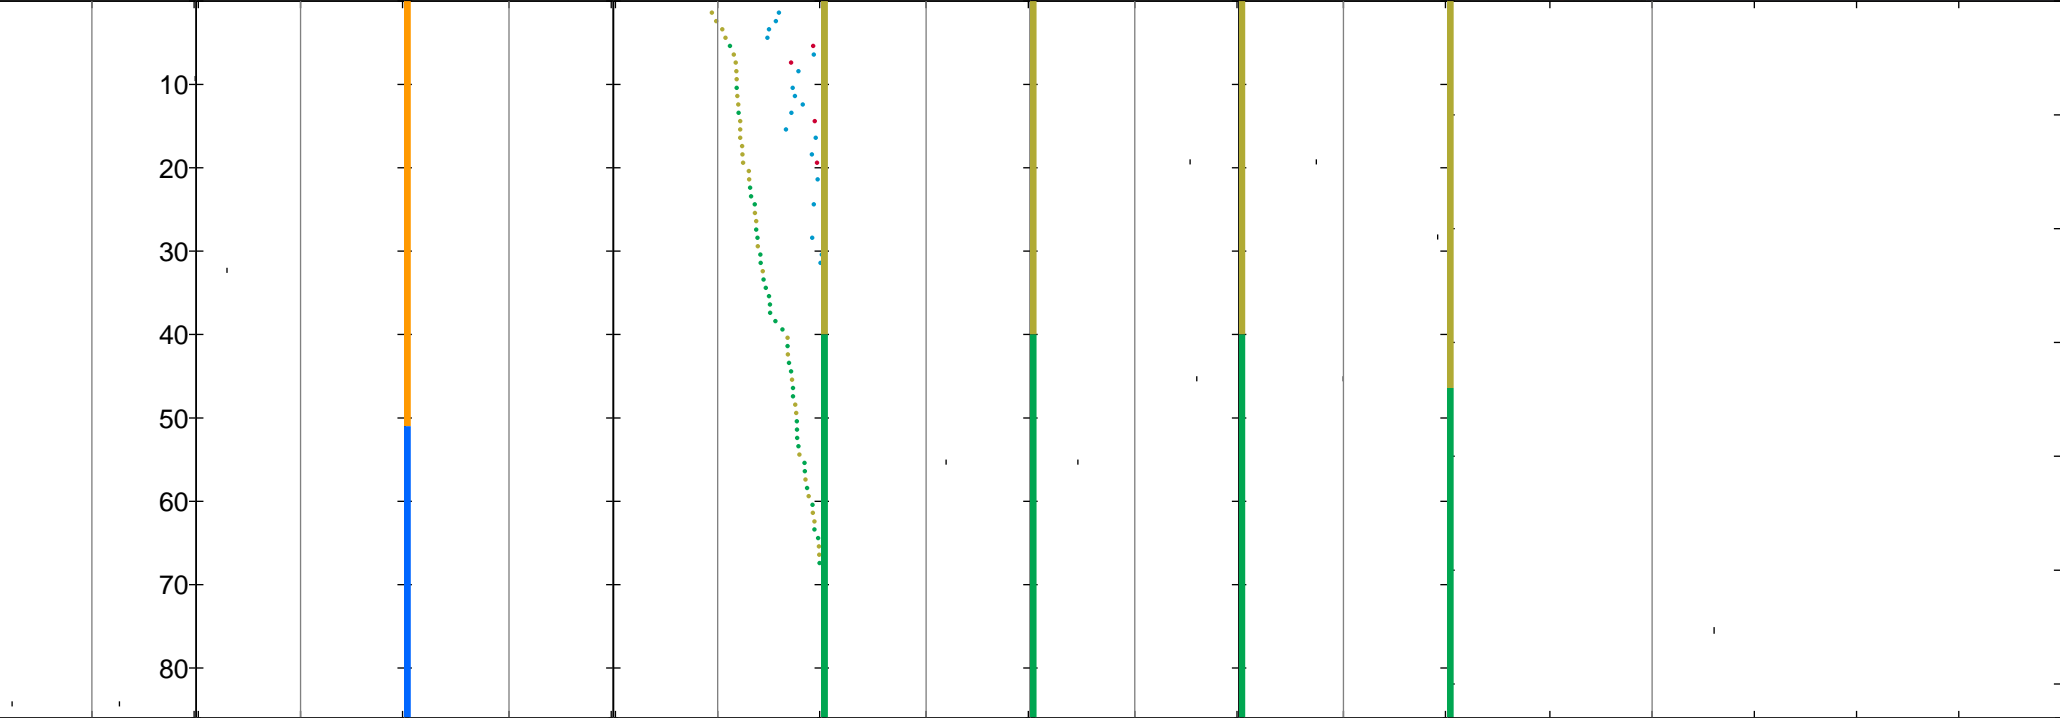

1 Cue On [85]    2 Nose In [85]    3 Tone [50,35]    4 Go [85]    5 Choice [39,46]    6 Side In [39,46]    7 Nose Out [39,46]    8 Reward [33,29]

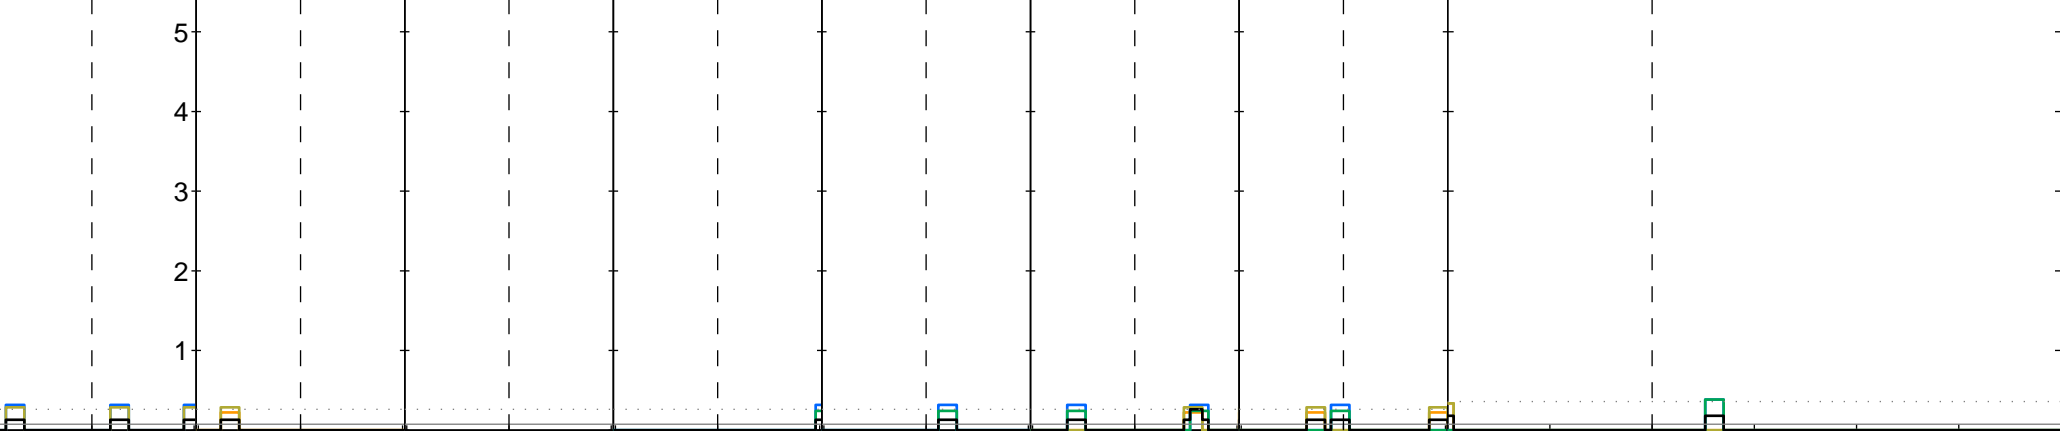

**Cell: C0320070611T07g**

AP: 0.96 ML: 3.6 DV: 5.1  
w: 4 n: 1431  $P_{ISI>2}$ : 0.95  
1/2pw: 210 $\mu$ s p->v: 798 $\mu$ s  
 $\beta_T$ : NaN  $\beta_D$ : NaN  
 $\beta_P$ : NaN SI: NaN  
Session FR: 0.191 Hz  
Pk Ev: None  
Pk FR: --

MSN

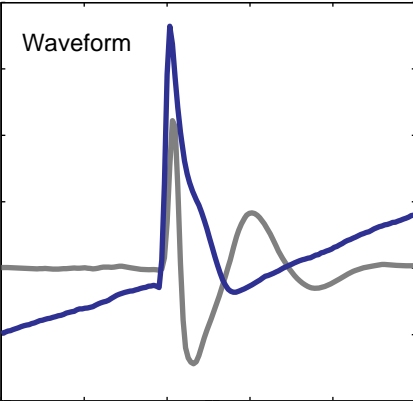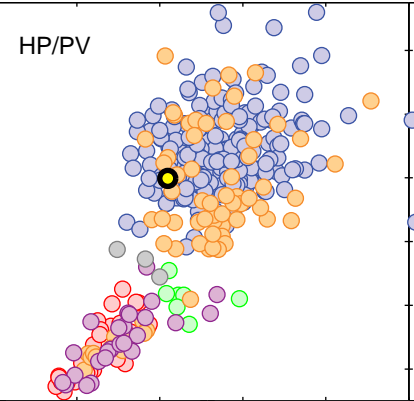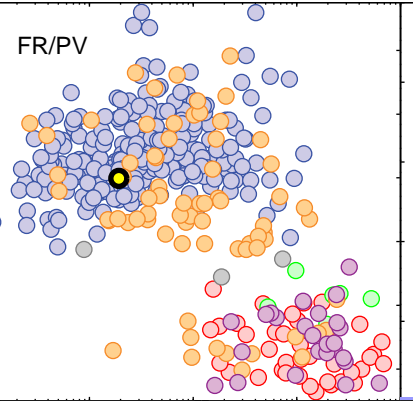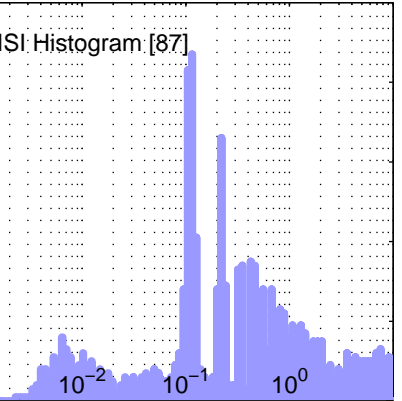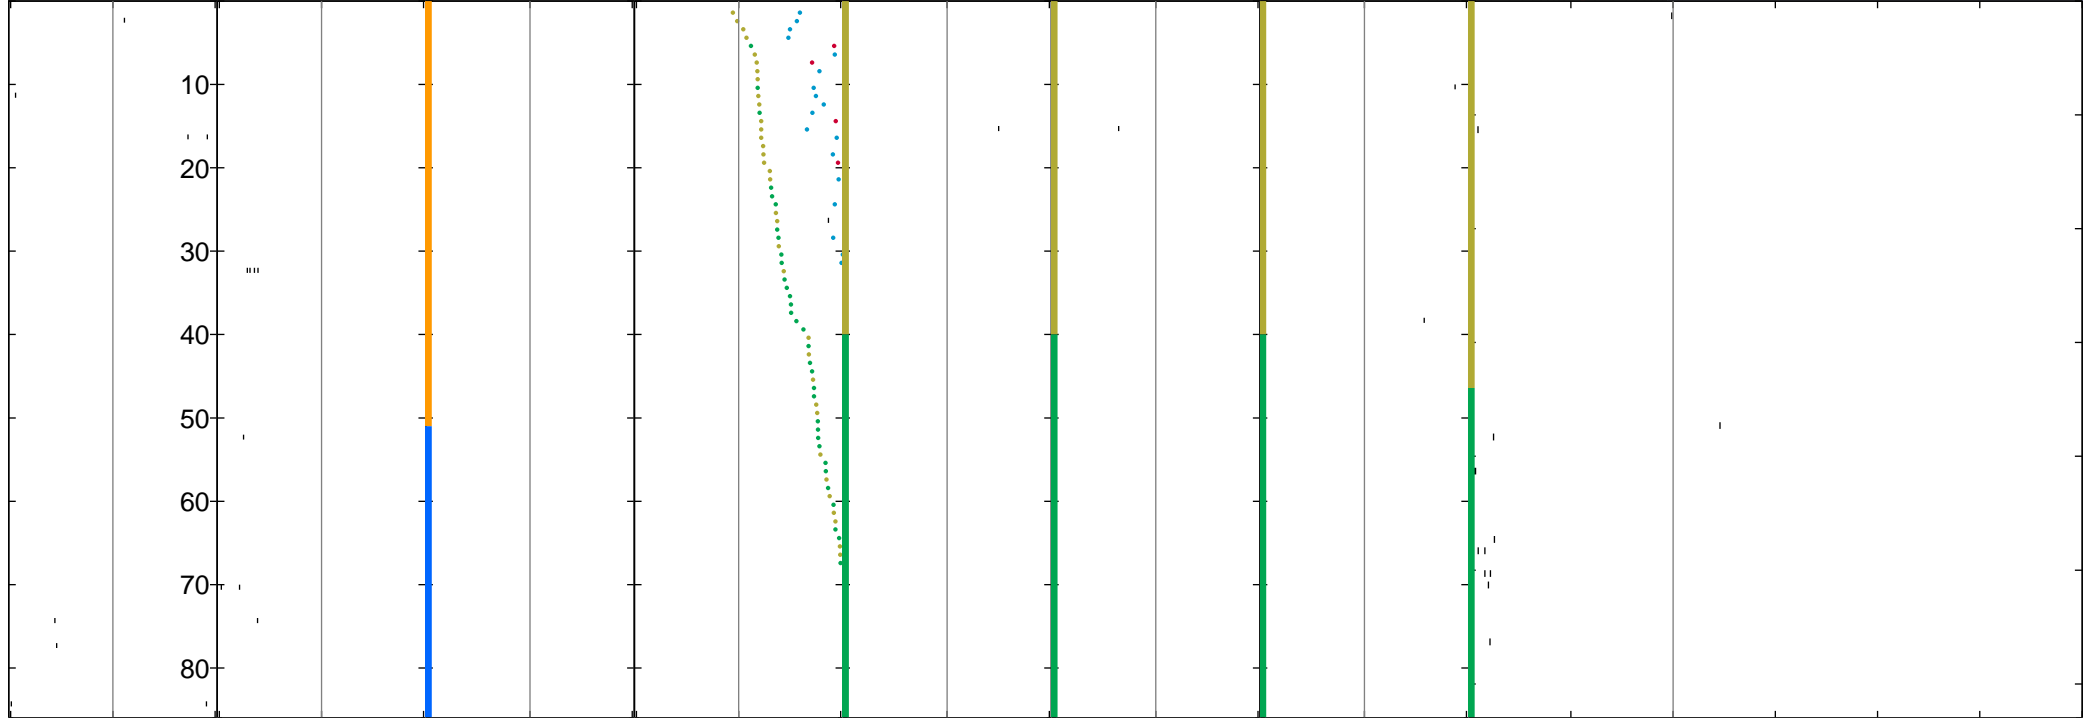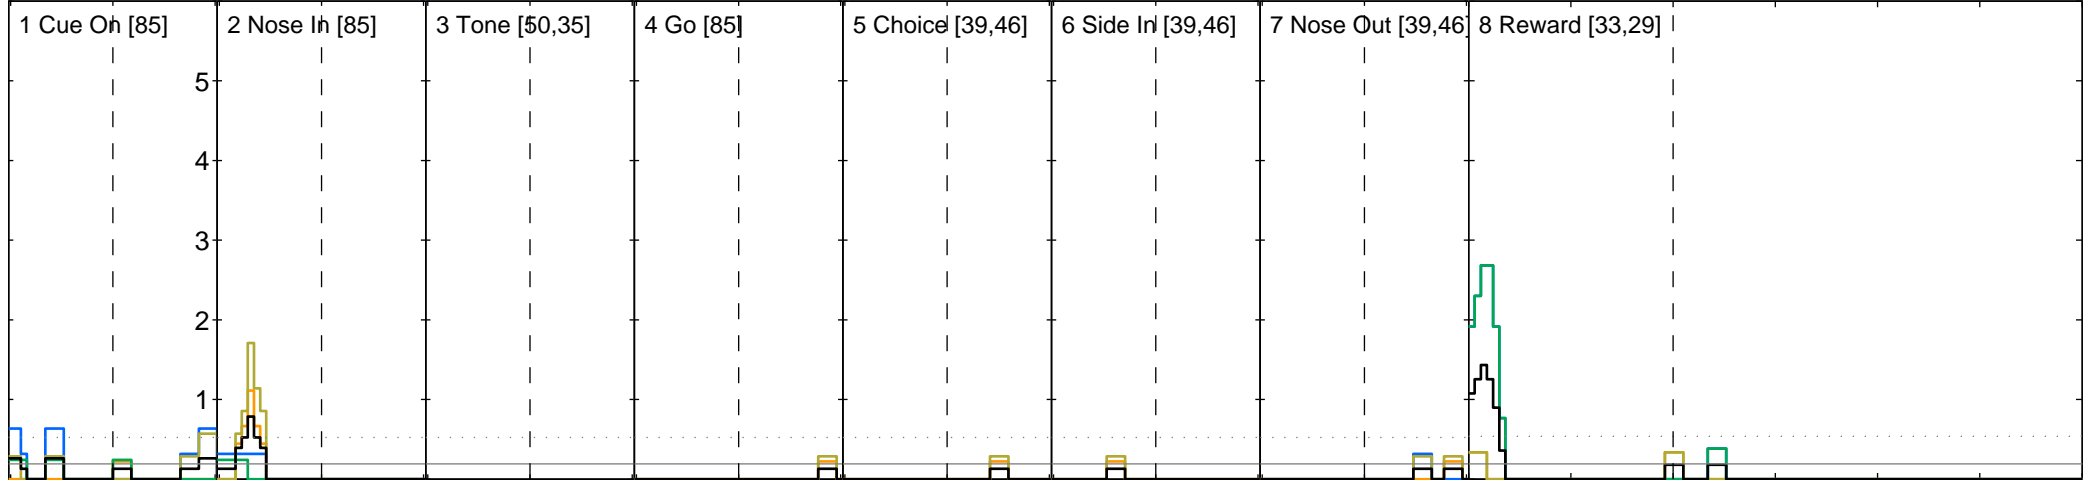



**Cell: C0320070611T07h**

AP: 0.96 ML: 3.6 DV: 5.1  
w: 4 n: 763  $P_{ISI>2}$ : 0.98  
1/2pw: 283 $\mu$ s p->v: 864 $\mu$ s  
 $\beta_T$ : NaN  $\beta_D$ : NaN  
 $\beta_P$ : NaN SI: NaN  
Session FR: 0.102 Hz  
Pk Ev: None  
Pk FR: --

MSN

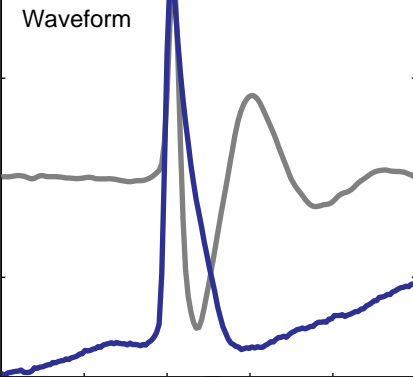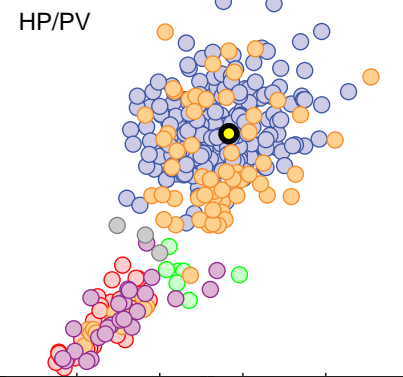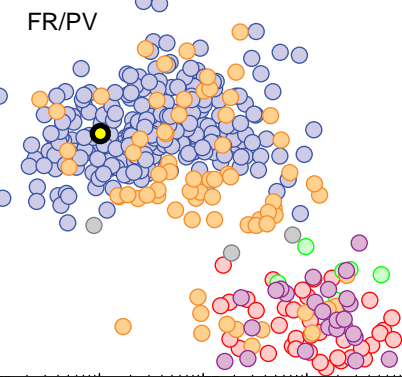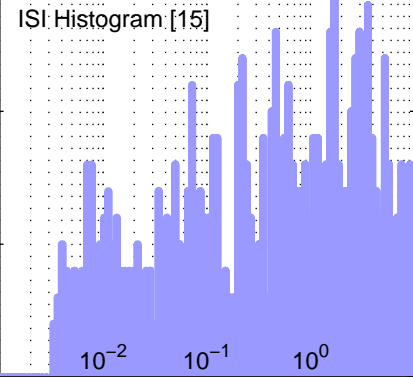

10  
20  
30  
40  
50  
60  
70  
80

1 Cue On [85] 2 Nose In [85] 3 Tone [50,35] 4 Go [85] 5 Choice [39,46] 6 Side In [39,46] 7 Nose Out [39,46] 8 Reward [33,29]

5  
4  
3  
2  
1

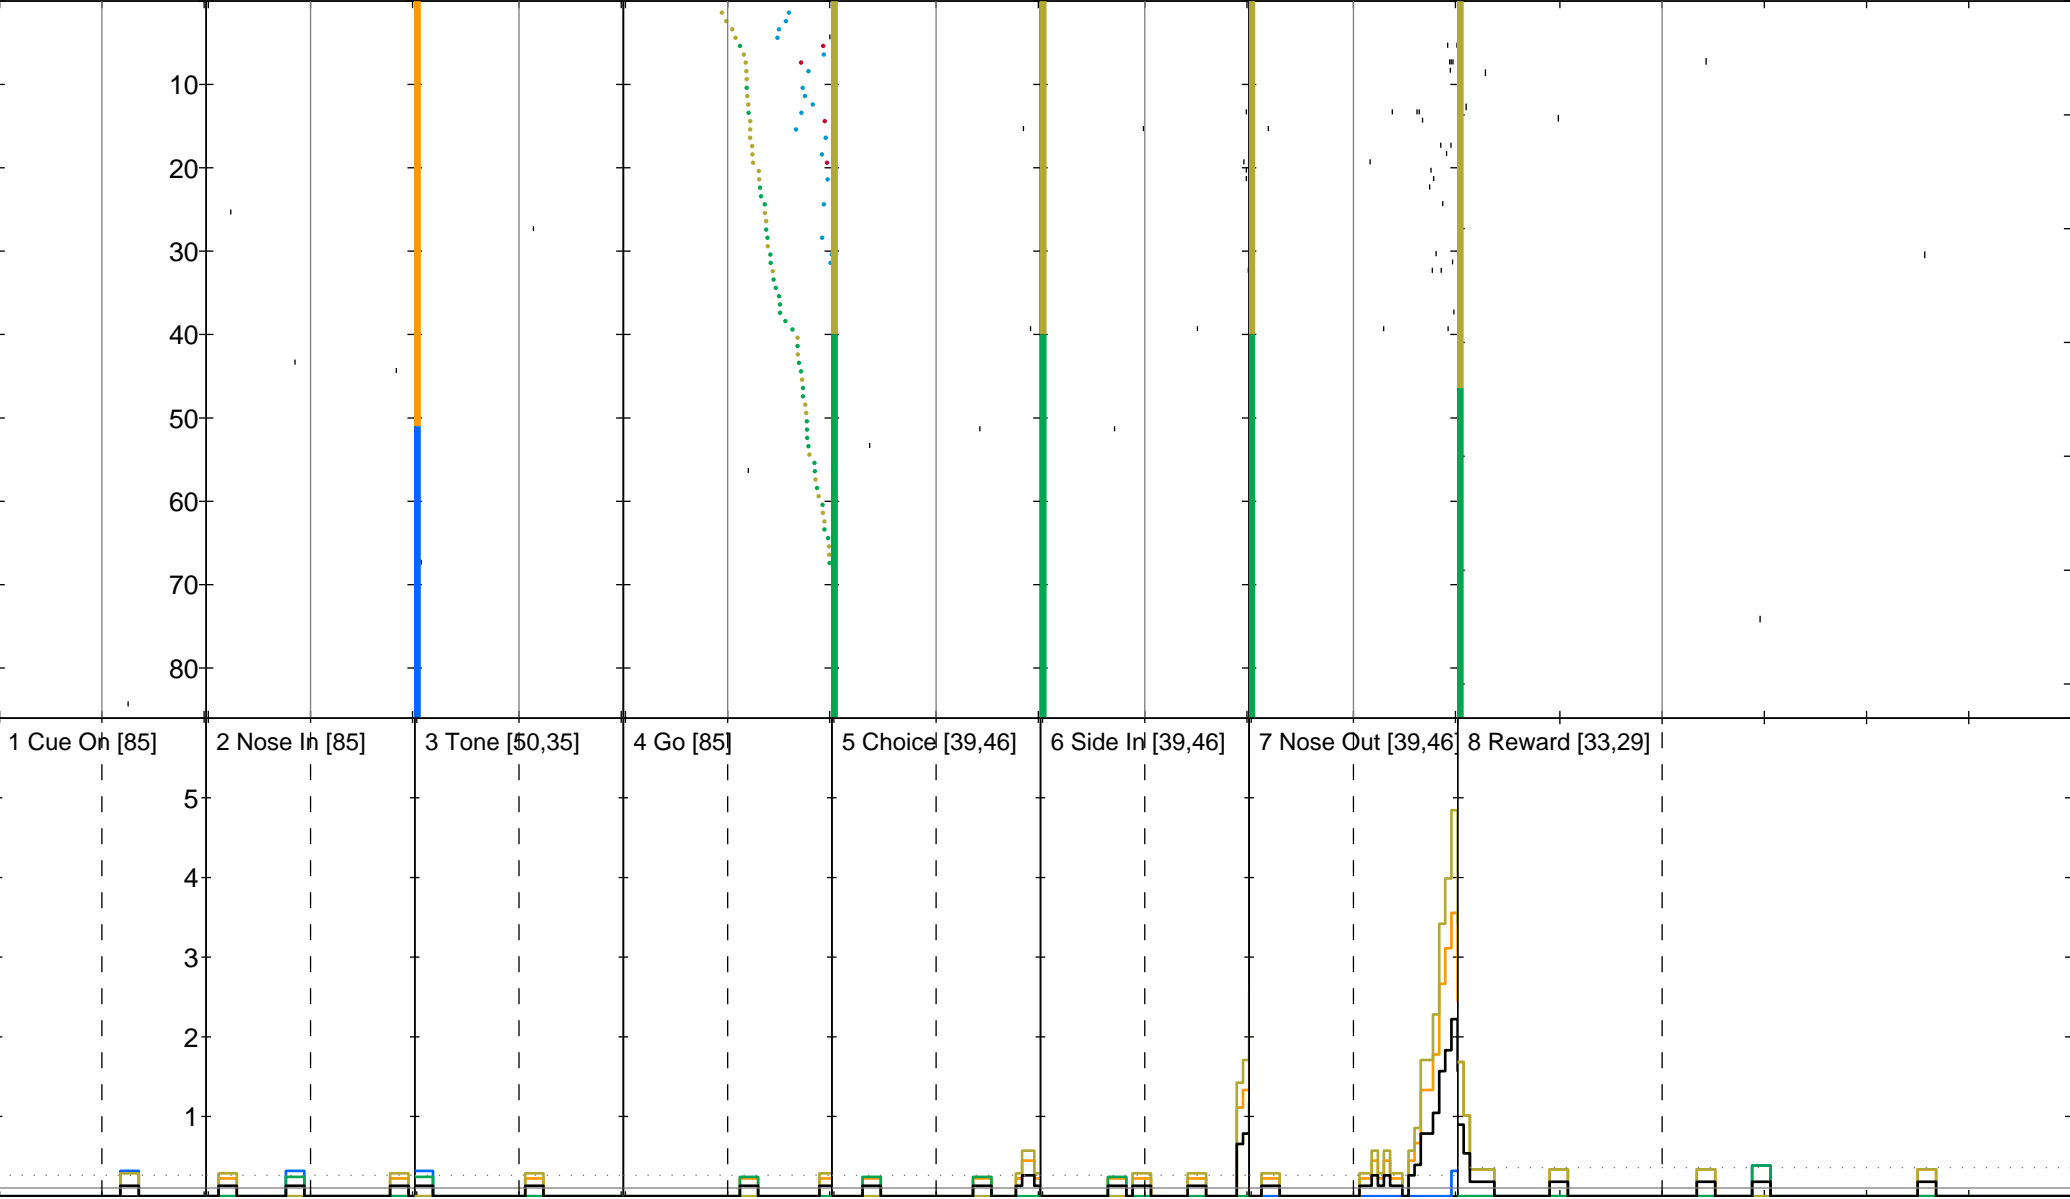

**Cell: C0320070611T07i**

AP: 0.96 ML: 3.6 DV: 5.1  
w: 4 n: 179  $P_{ISI>2}$ : 1  
1/2pw: 224 $\mu$ s p->v: 784 $\mu$ s  
 $\beta_T$ : NaN  $\beta_D$ : NaN  
 $\beta_P$ : NaN SI: NaN  
Session FR: 0.024 Hz  
Pk Ev: None  
Pk FR: --

MSN

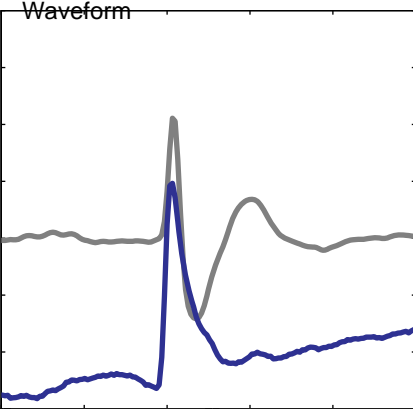

HP/PV

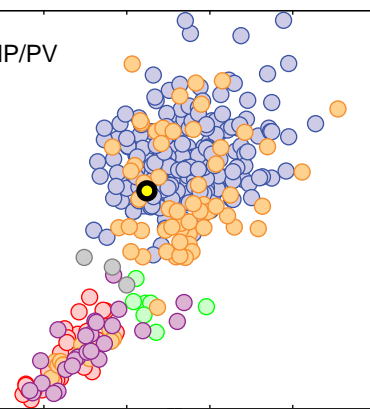

FR/PV

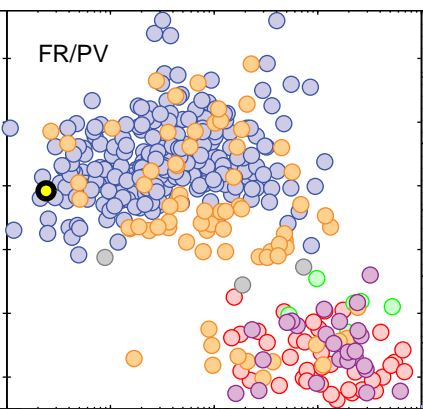

ISI Histogram [6]

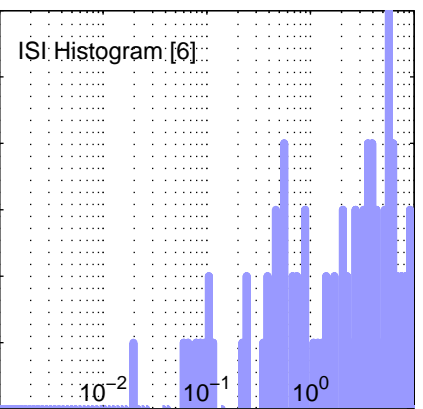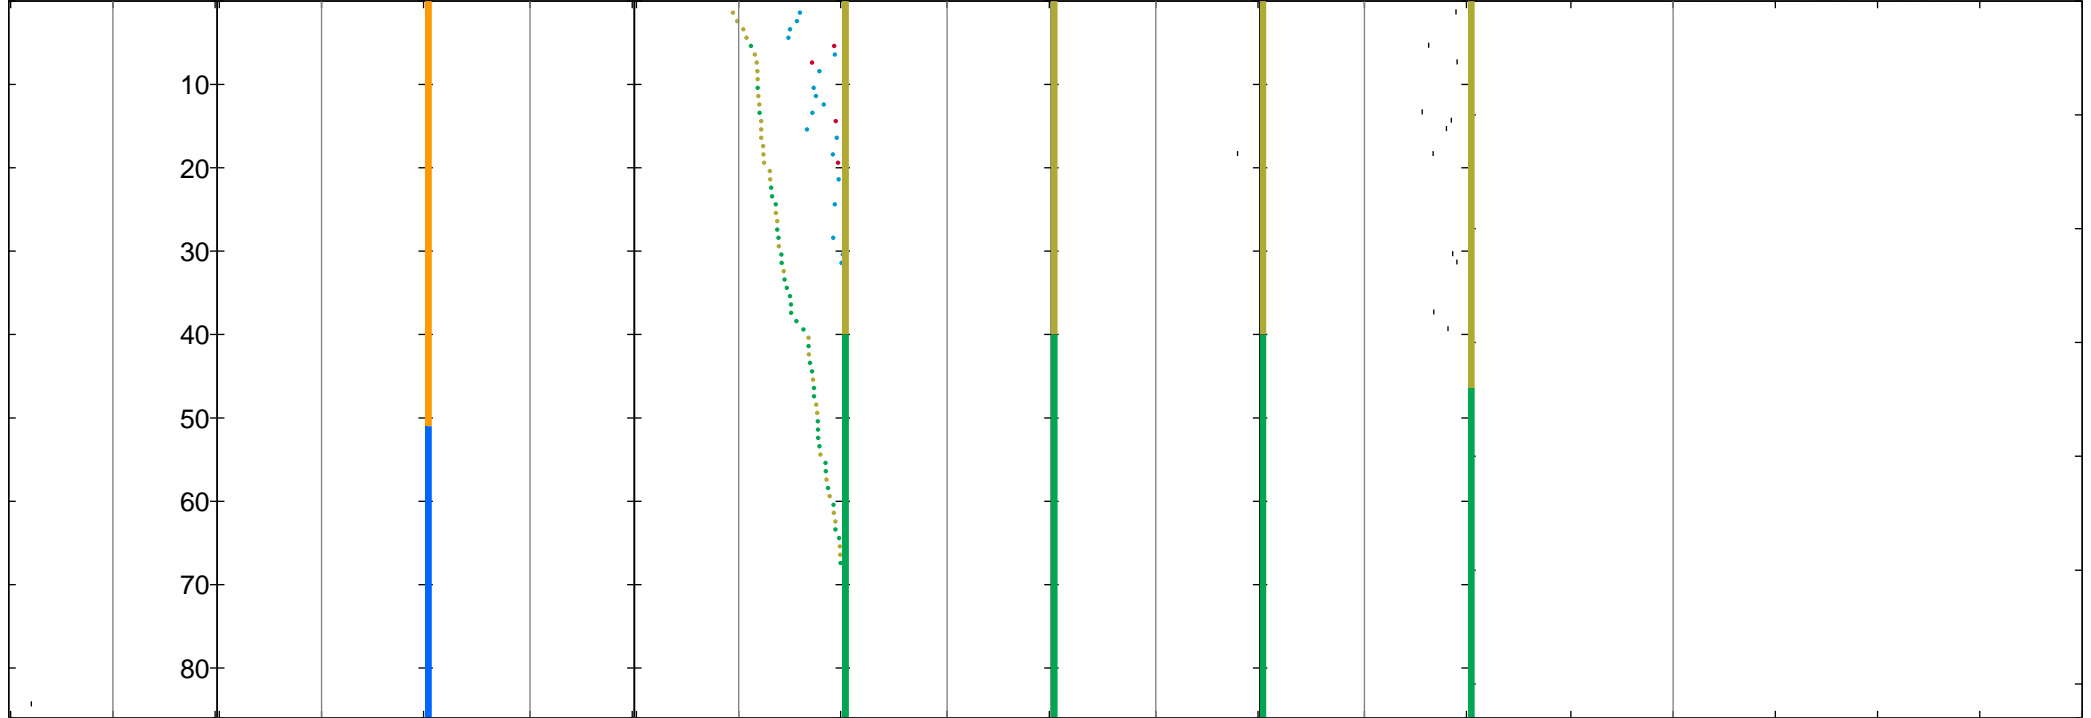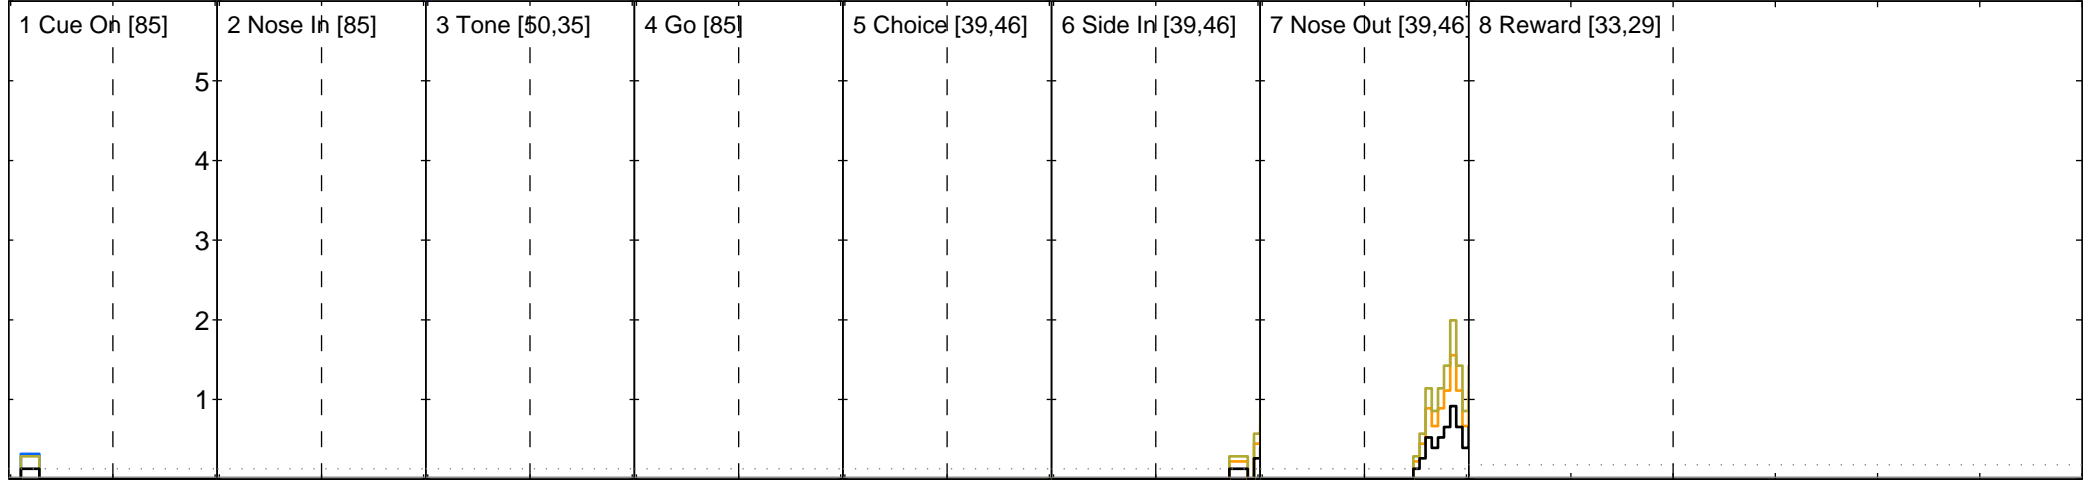

**Cell: C0320070611T09b**

AP: 1.6 ML: 3.7 DV: 4.7  
w: 2 n: 2747  $P_{ISI>2}$ : 0.92  
1/2pw: 184 $\mu$ s p->v: 885 $\mu$ s  
 $\beta_T$ : NaN  $\beta_D$ : NaN  
 $\beta_P$ : NaN SI: NaN  
Session FR: 0.367 Hz  
Pk Ev: None  
Pk FR: --

MSN

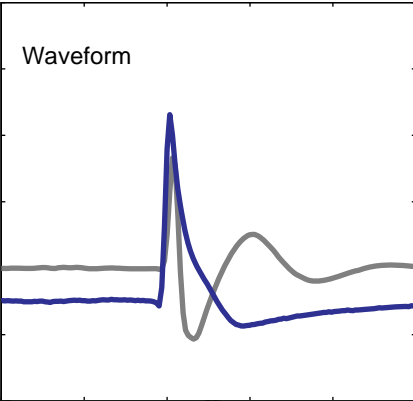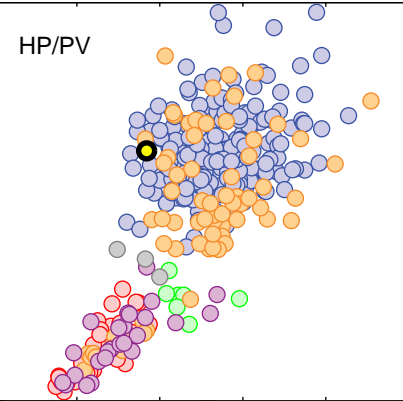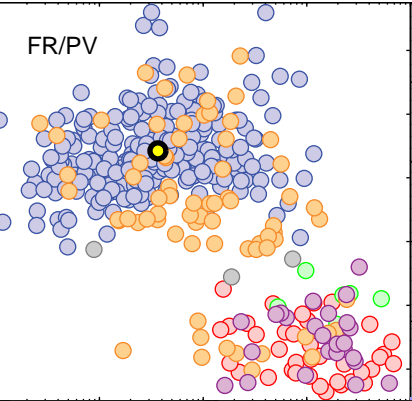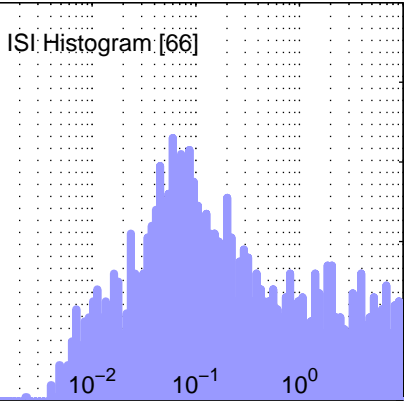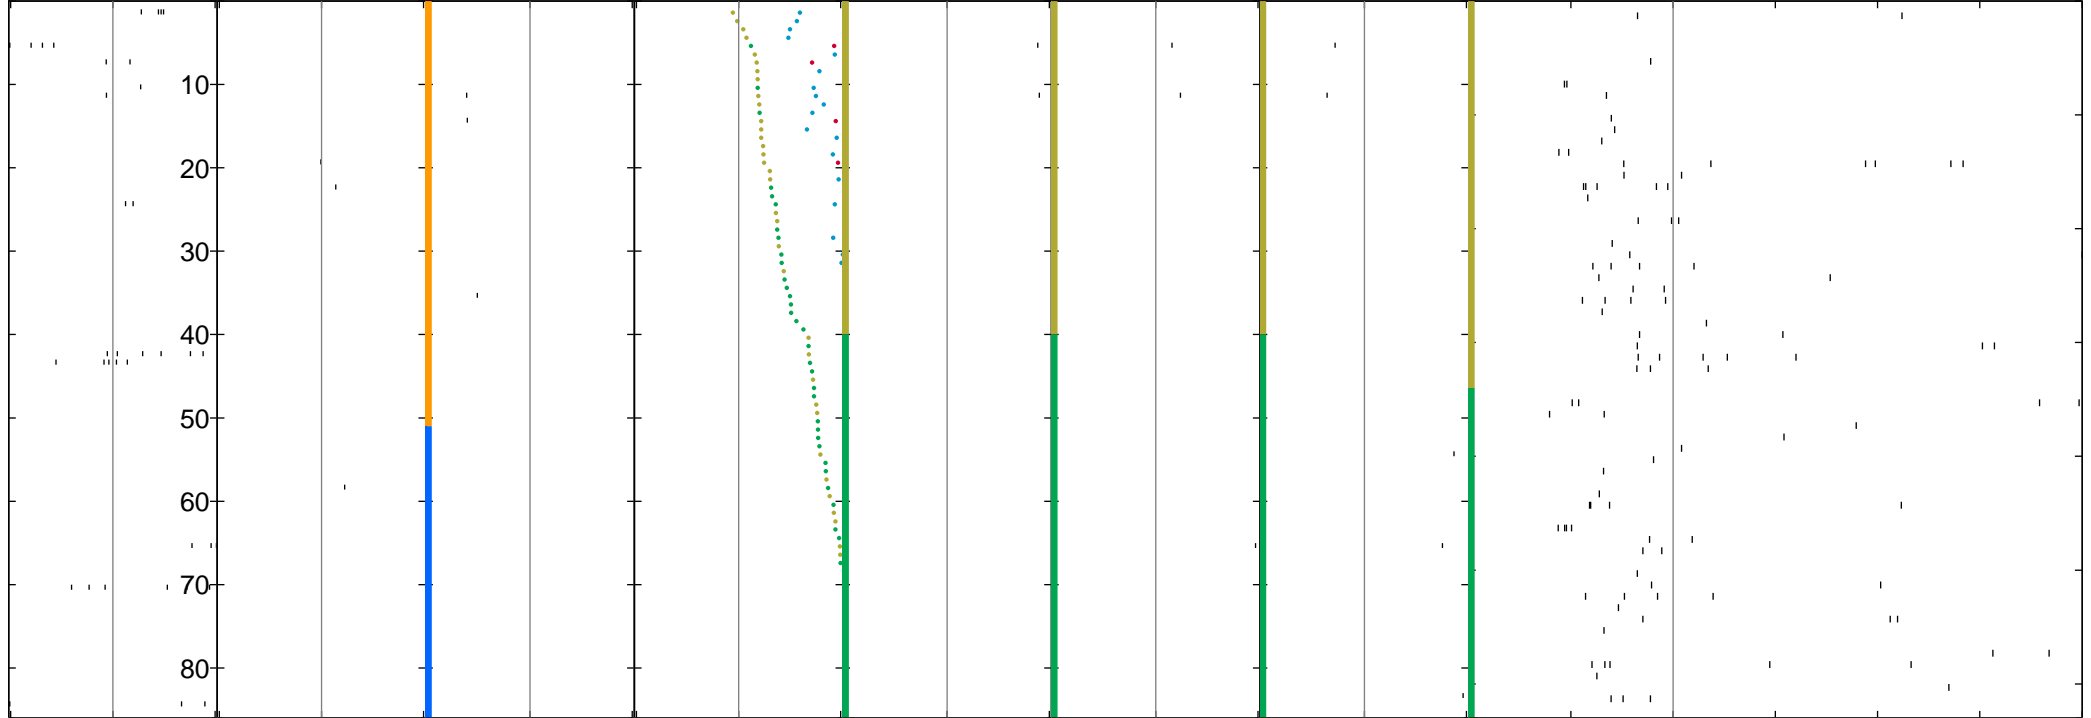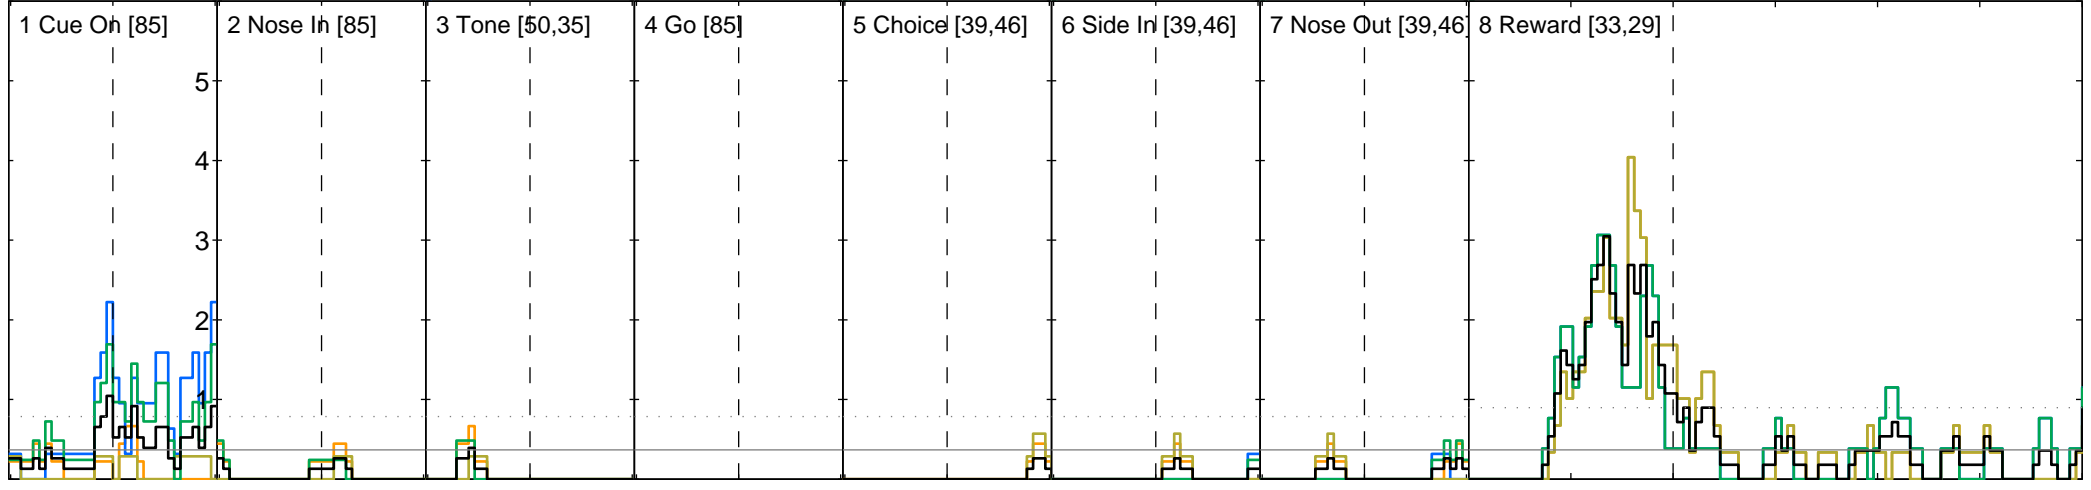

**Cell: C0320070611T11a**

AP: -0.96 ML: 3.7 DV: 5  
w: 2 n: 219  $P_{ISI>2}$ : 1  
1/2pw: 243 $\mu$ s p->v: 923 $\mu$ s  
 $\beta_T$ : NaN  $\beta_D$ : NaN  
 $\beta_P$ : NaN SI: NaN  
Session FR: 0.0294 Hz  
Pk Ev: None  
Pk FR: --

MSN

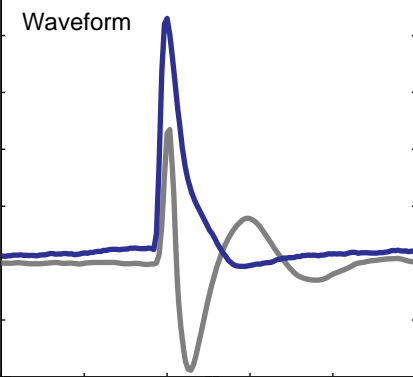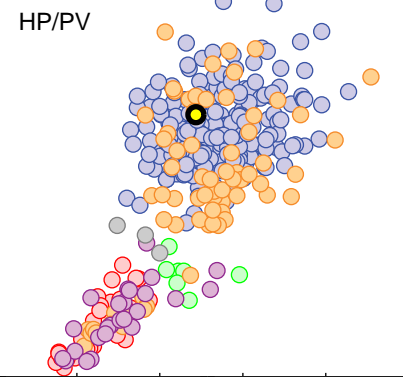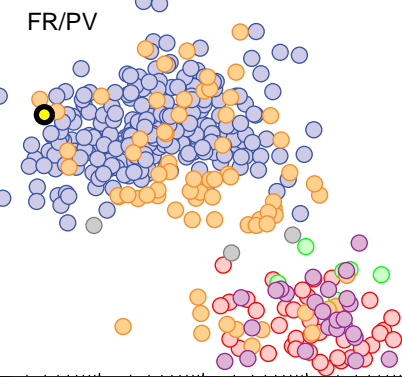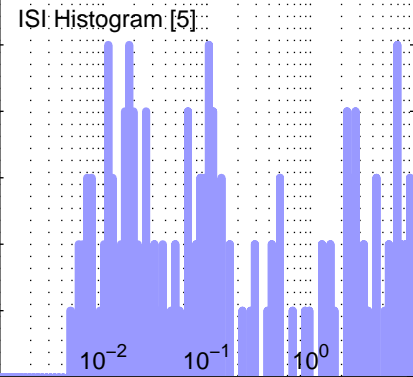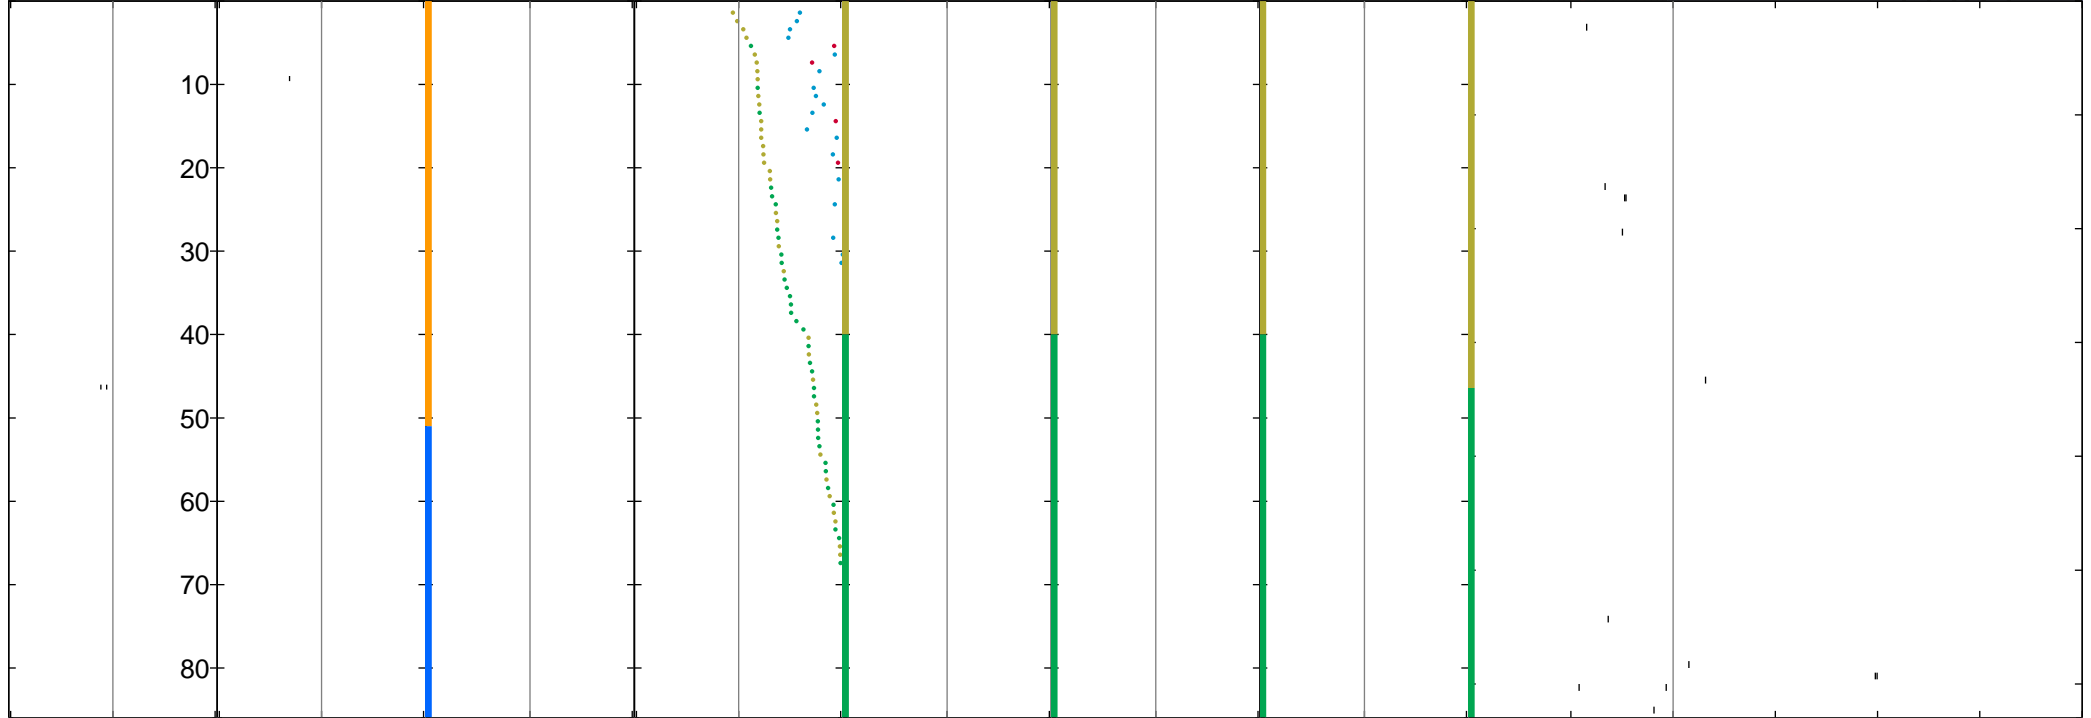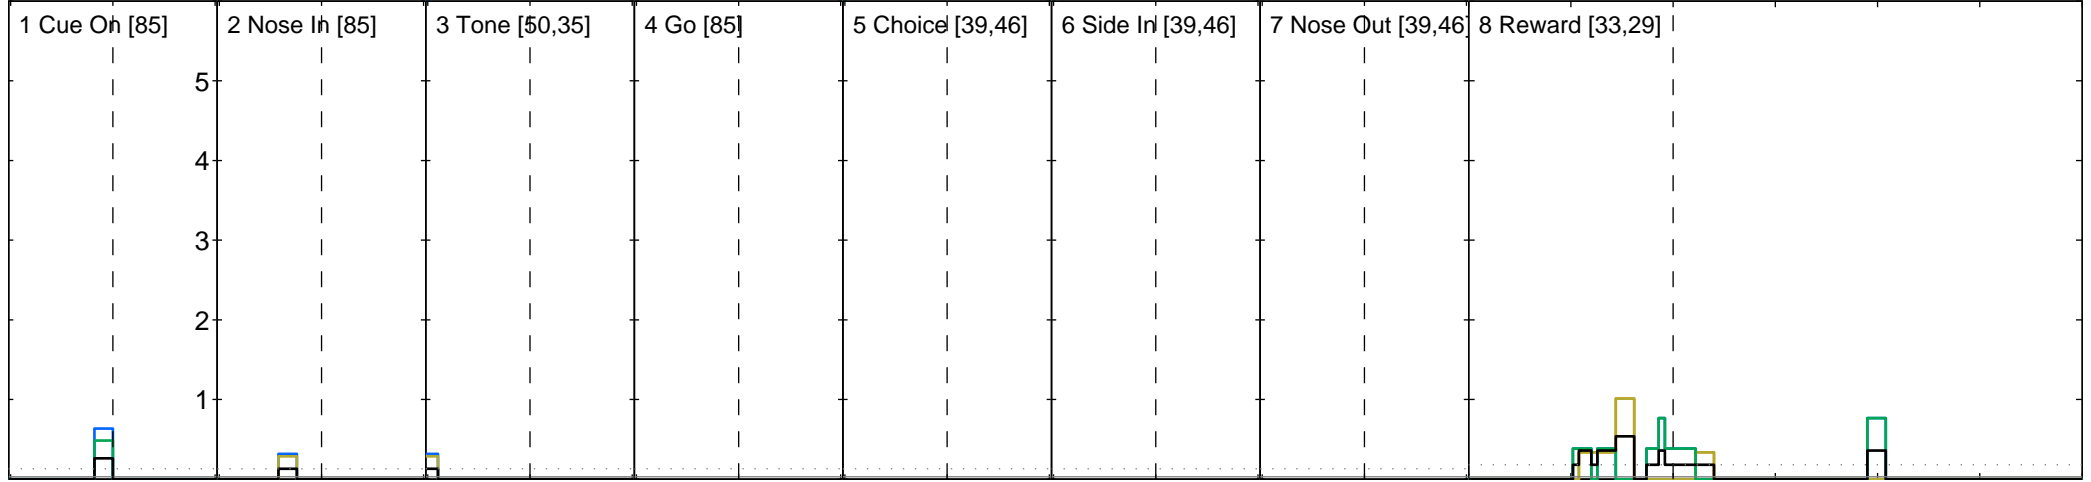

**Cell: C0320070611T11b**

AP: -0.96 ML: 3.7 DV: 5  
w: 4 n: 8979  $P_{ISI>2}$ : 0.81  
1/2pw: 275 $\mu$ s p->v: 837 $\mu$ s  
 $\beta_T$ : NaN  $\beta_D$ : NaN  
 $\beta_P$ : NaN SI: NaN  
Session FR: 1.2 Hz  
Pk Ev: None  
Pk FR: --

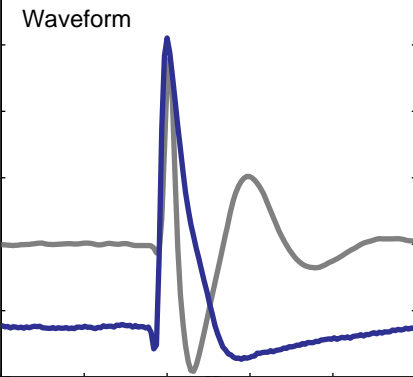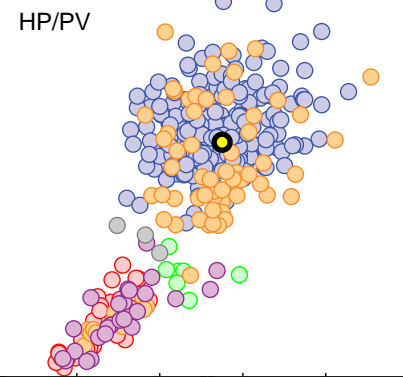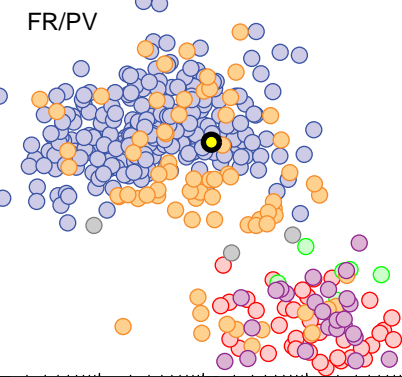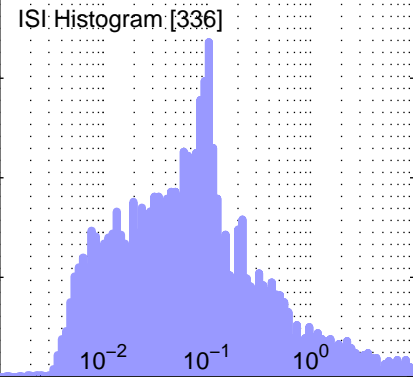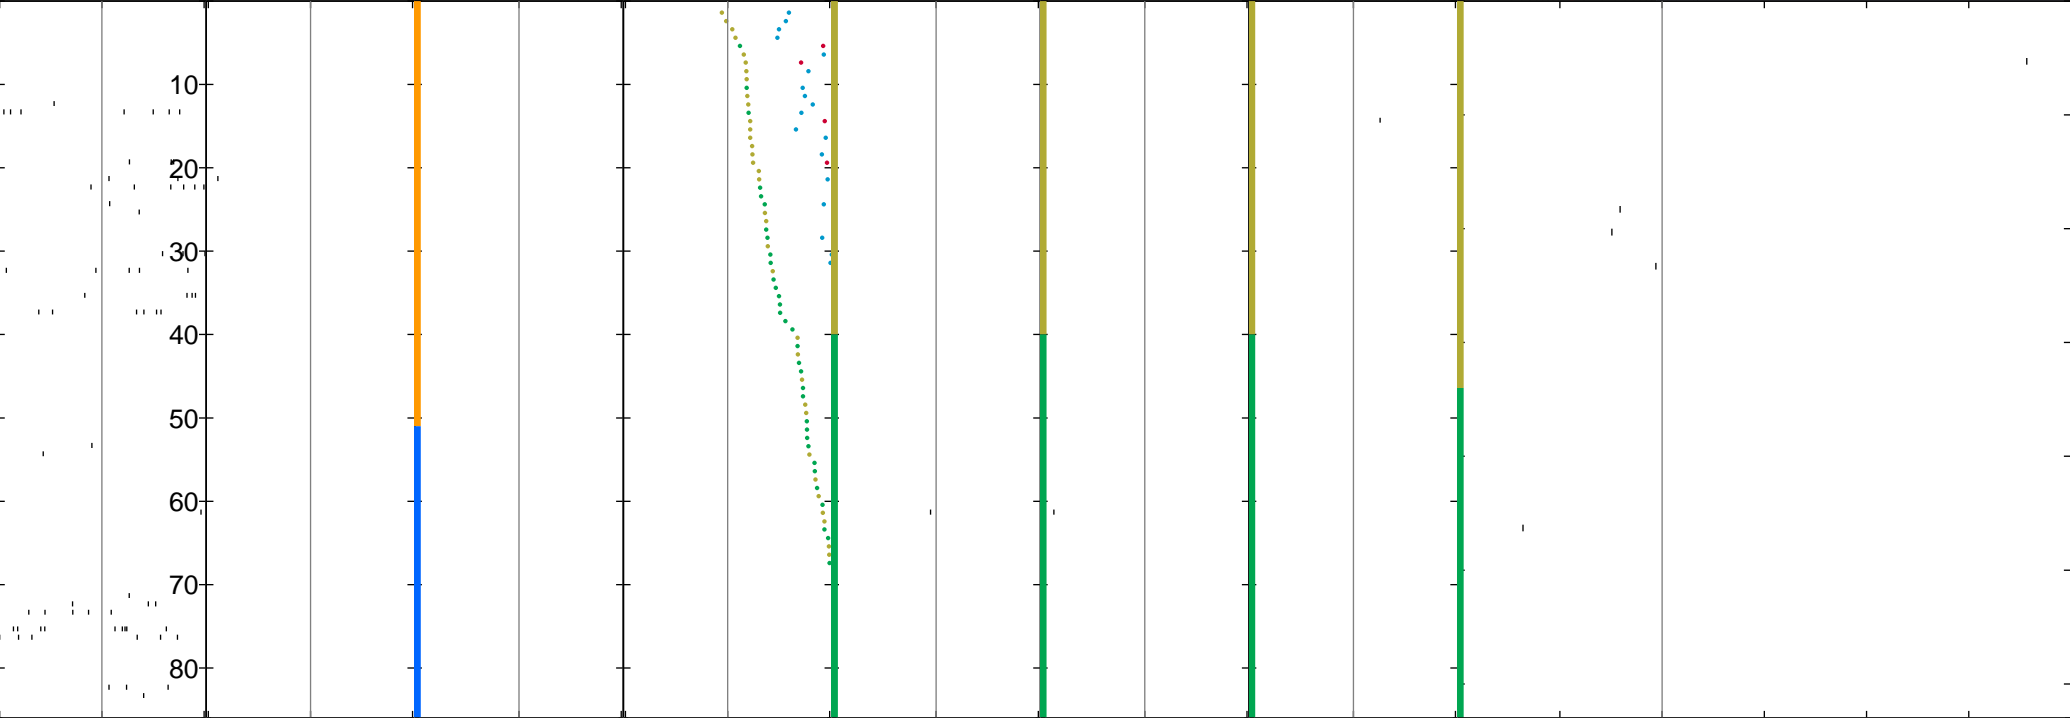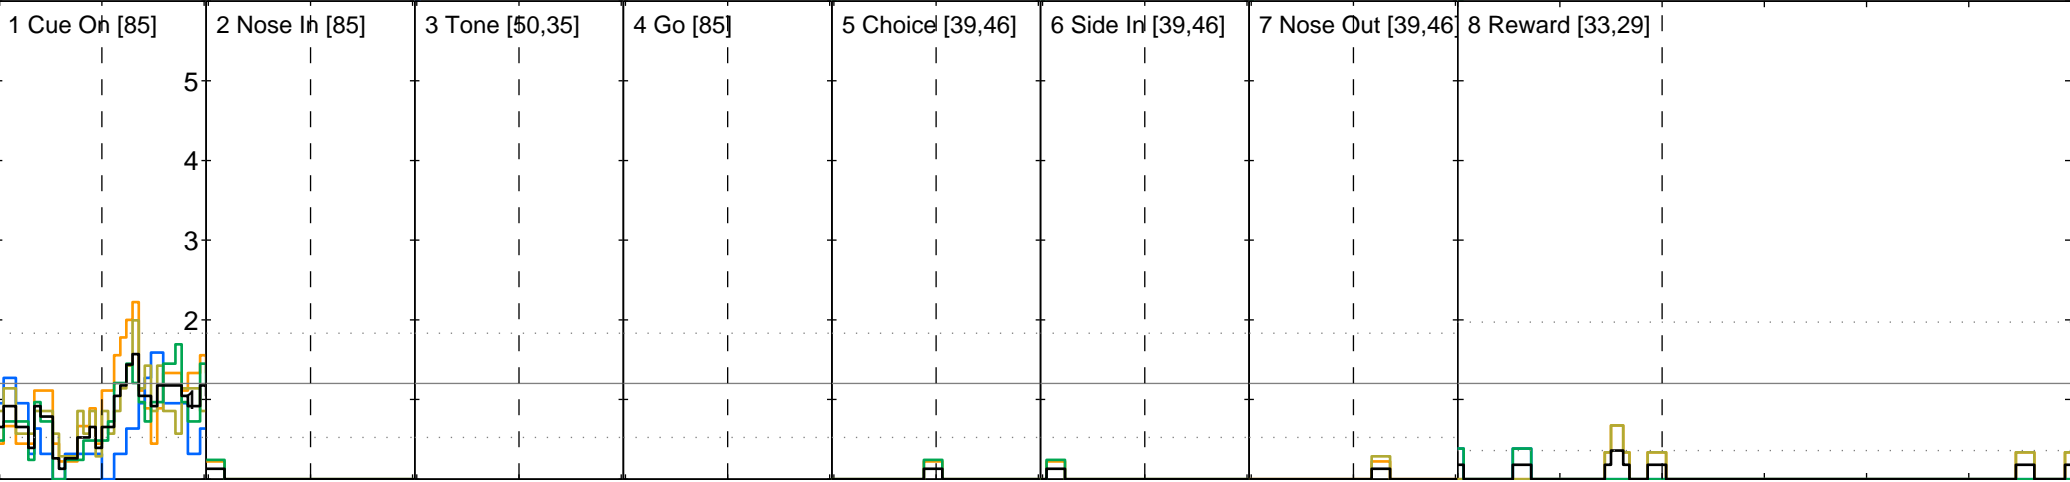

**Cell: C0320070611T11c**

AP: -0.96 ML: 3.7 DV: 5  
w: 4 n: 351  $P_{ISI>2}$ : 0.99  
1/2pw: 282 $\mu$ s p->v: 826 $\mu$ s  
 $\beta_T$ : NaN  $\beta_D$ : NaN  
 $\beta_P$ : NaN SI: NaN  
Session FR: 0.0477 Hz  
Pk Ev: None  
Pk FR: --

MSN

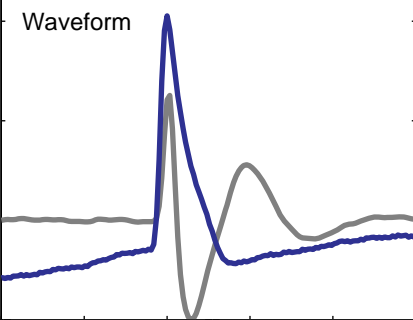

HP/PV

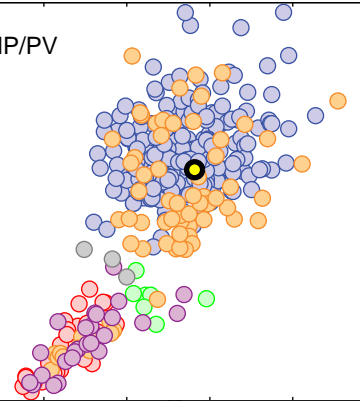

FR/PV

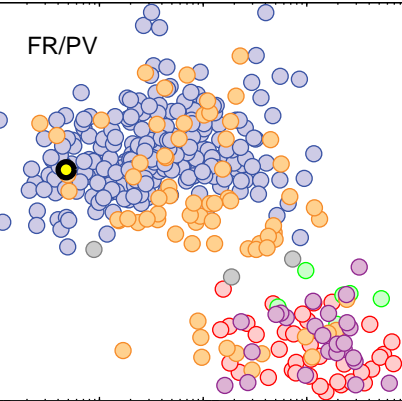

ISI Histogram [12]

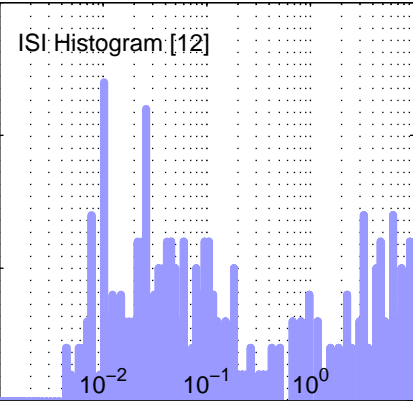

10  
20  
30  
40  
50  
60  
70  
80

1 Cue On [85] 2 Nose In [85] 3 Tone [50,35] 4 Go [85] 5 Choice [39,46] 6 Side In [39,46] 7 Nose Out [39,46] 8 Reward [33,29]

5  
4  
3  
2  
1

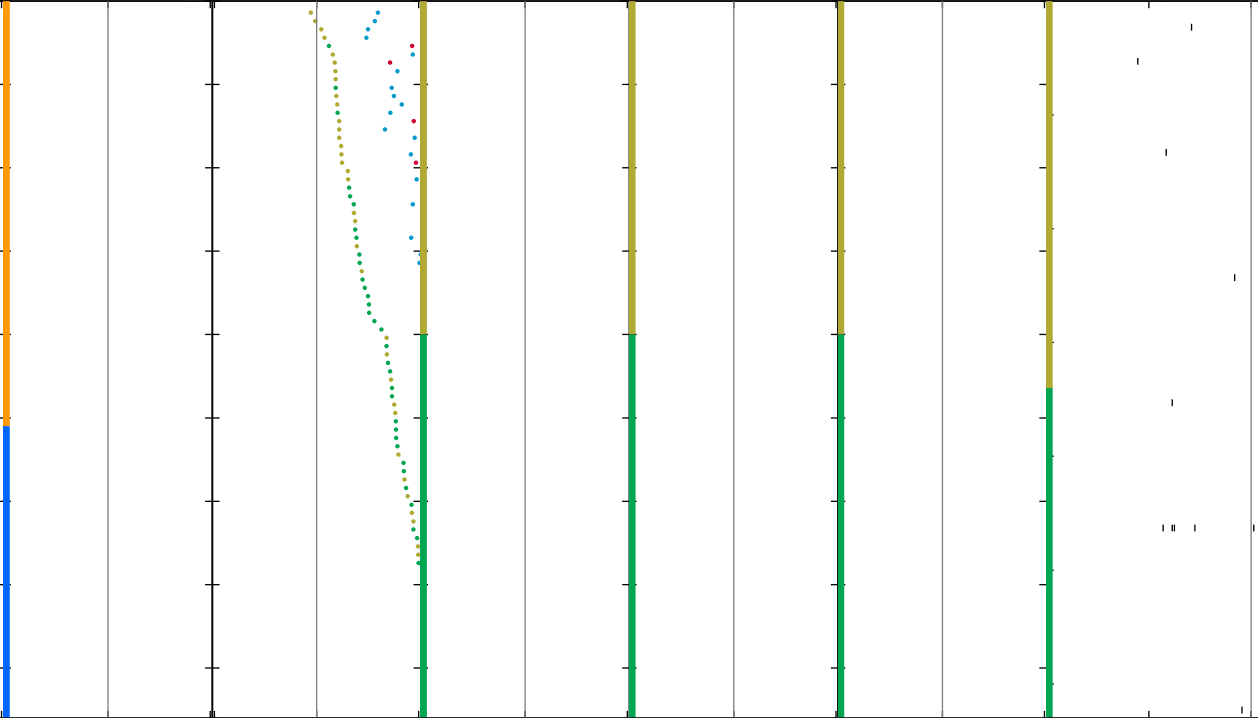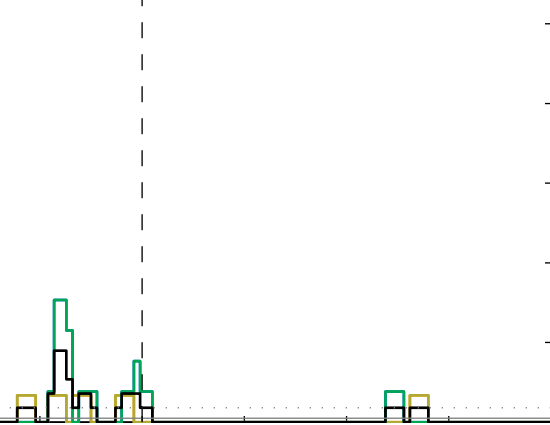

**Cell: C0320070611T11e**

AP: -0.96 ML: 3.7 DV: 5  
w: 4 n: 186  $P_{ISI>2}$ : 1  
1/2pw: 267 $\mu$ s p->v: 696 $\mu$ s  
 $\beta_T$ : NaN  $\beta_D$ : NaN  
 $\beta_P$ : NaN SI: NaN  
Session FR: 0.0252 Hz  
Pk Ev: None  
Pk FR: --

MSN

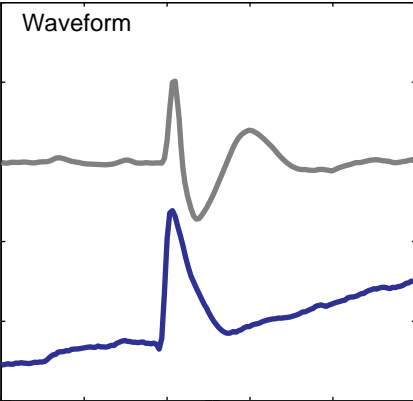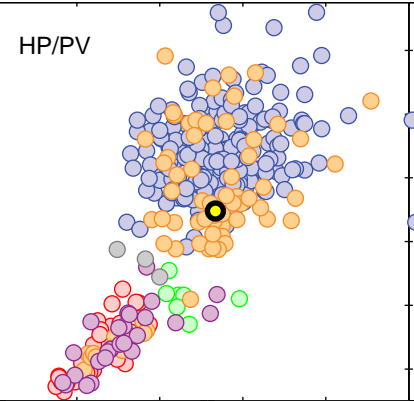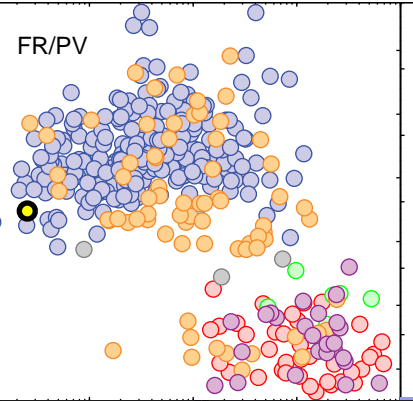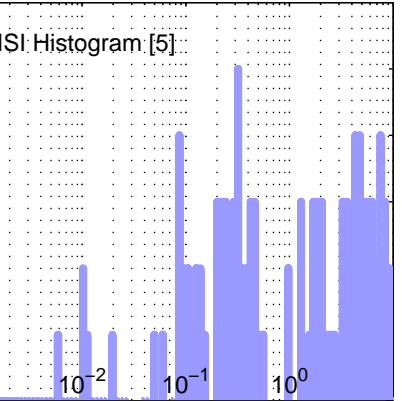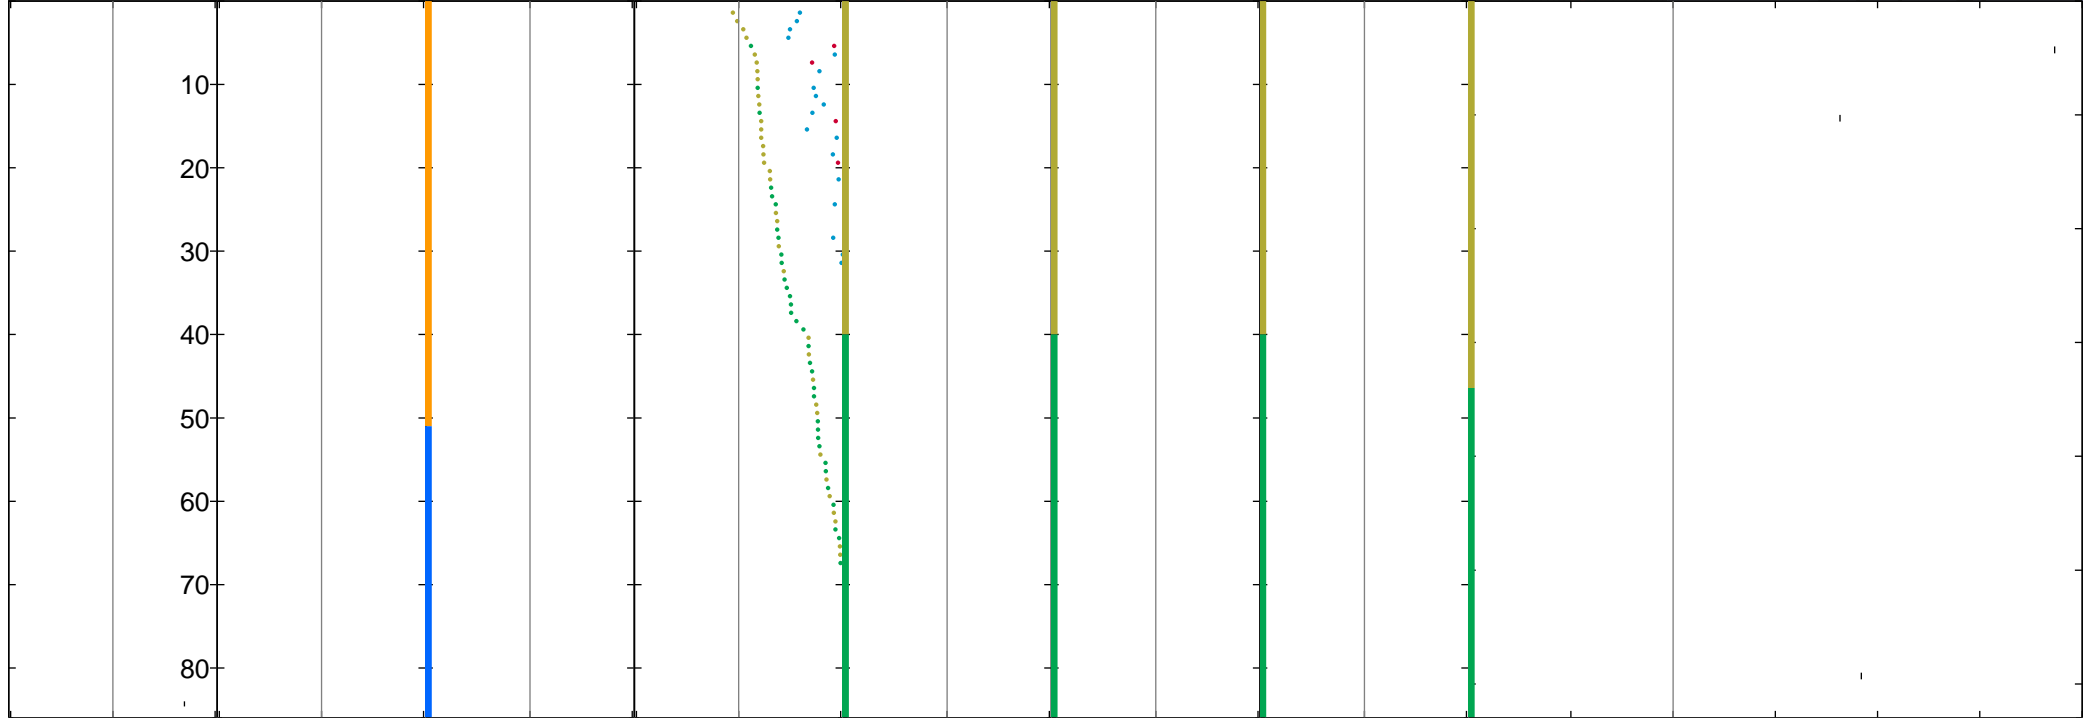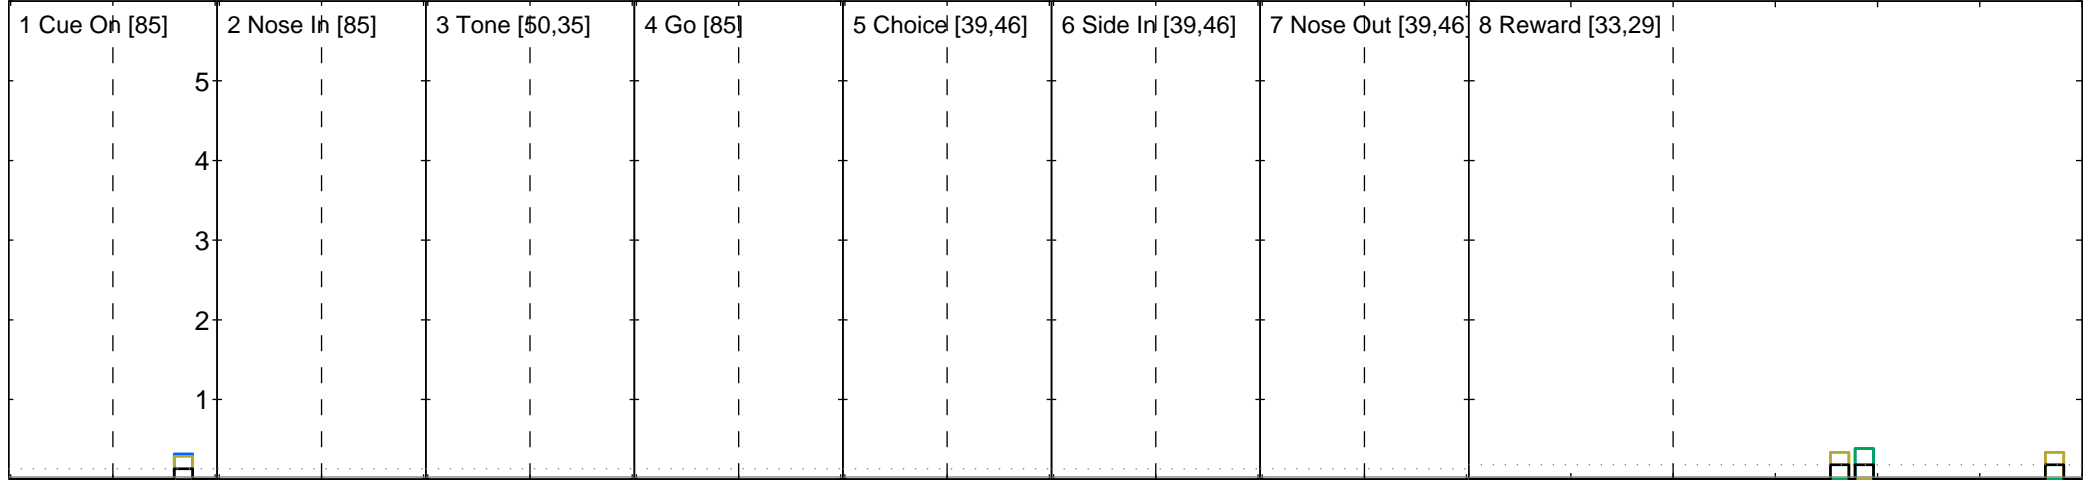



**Cell: C0320070611T15b**

AP: -2.3 ML: 4.6 DV: 6  
w: 3 n: 2137  $P_{ISI>2}$ : 0.92  
1/2pw: 221 $\mu$ s p->v: 738 $\mu$ s  
 $\beta_T$ : NaN  $\beta_D$ : NaN  
 $\beta_P$ : NaN SI: NaN  
Session FR: 0.289 Hz  
Pk Ev: None  
Pk FR: --

MSN

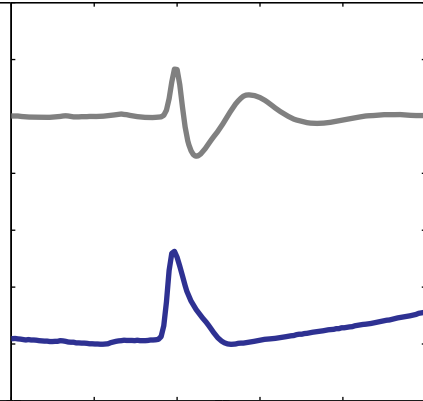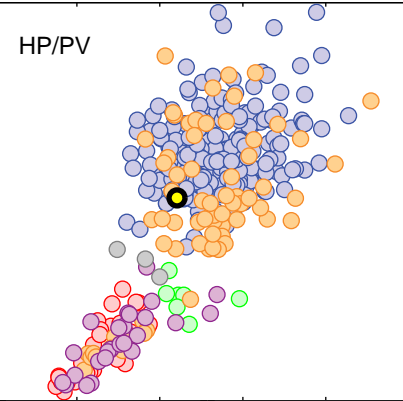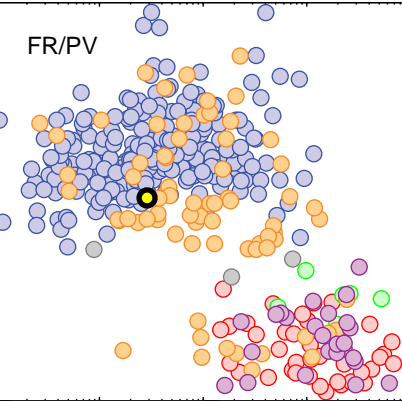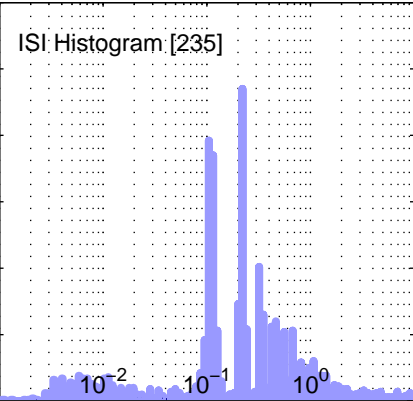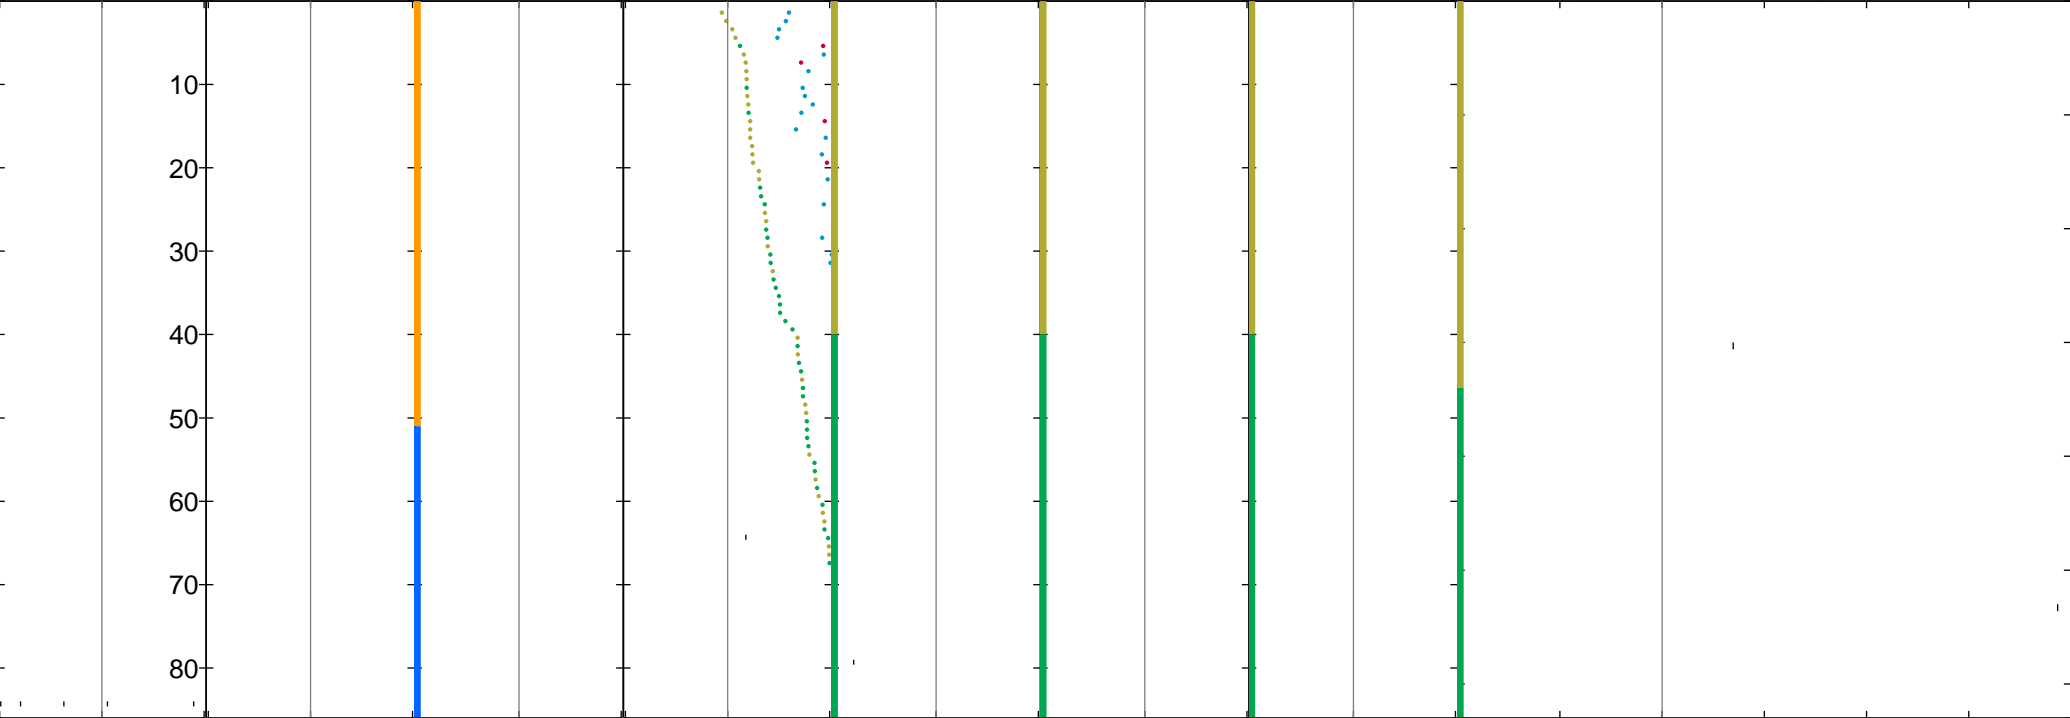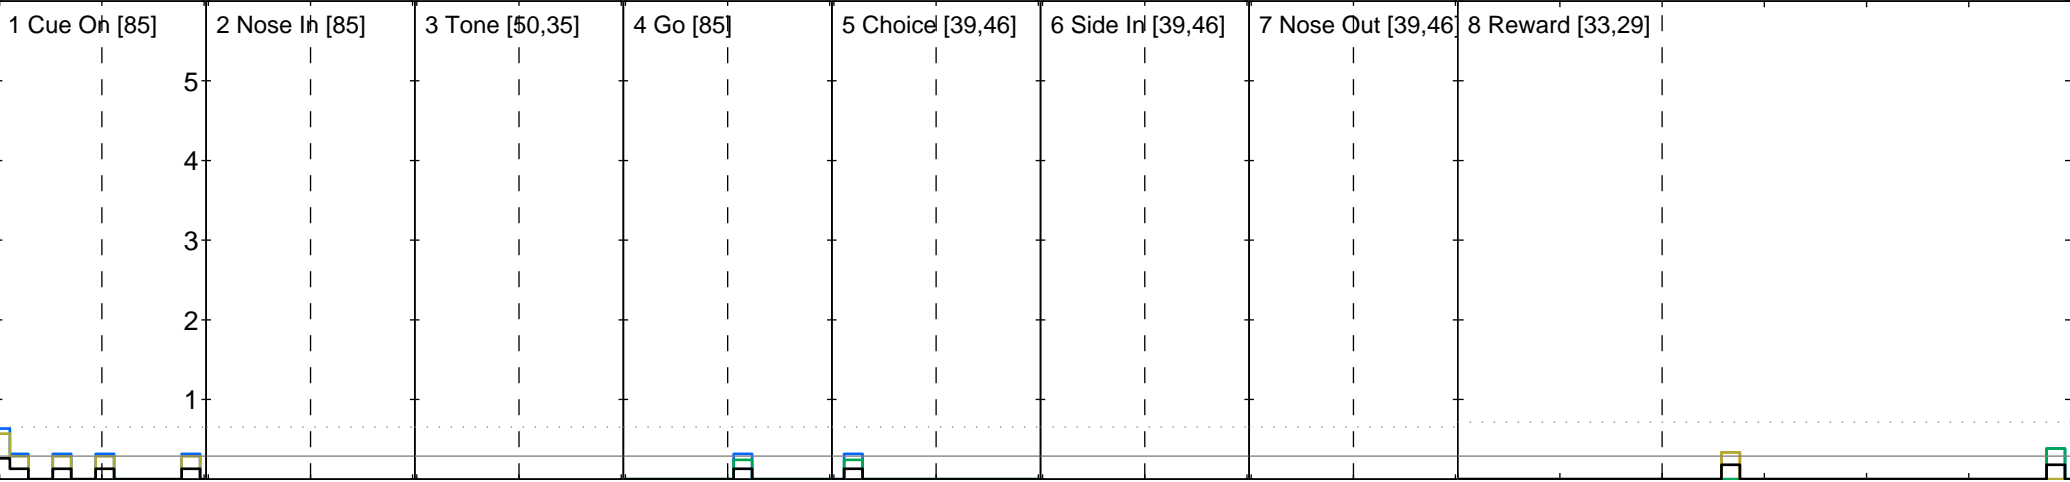

**Cell: C0320070613T06a**

AP: 1.7 ML: 1.3 DV: 6.2  
w: 4 n: 982  $P_{ISI>2}$ : 0.97  
1/2pw: 197 $\mu$ s p->v: 800 $\mu$ s  
 $\beta_T$ : NaN  $\beta_D$ : NaN  
 $\beta_P$ : NaN SI: NaN  
Session FR: 0.169 Hz  
Pk Ev: None  
Pk FR: --

MSN

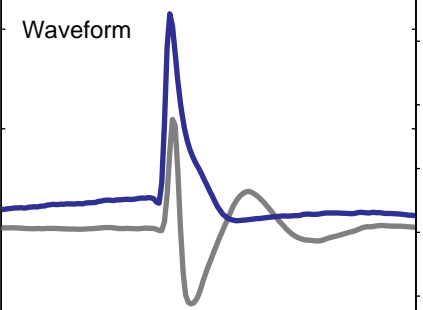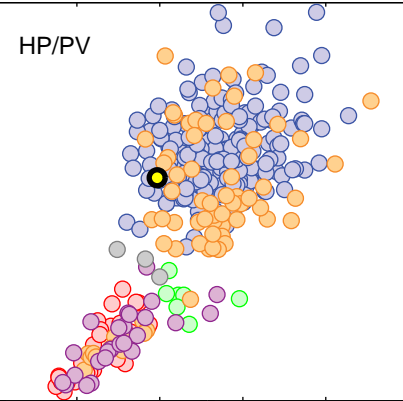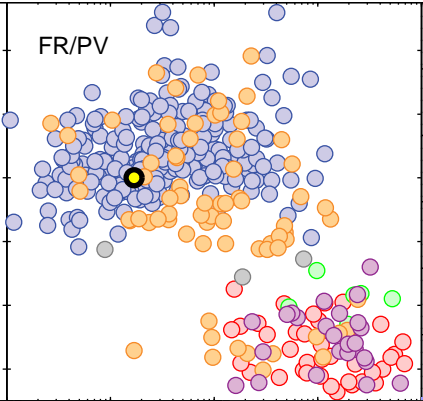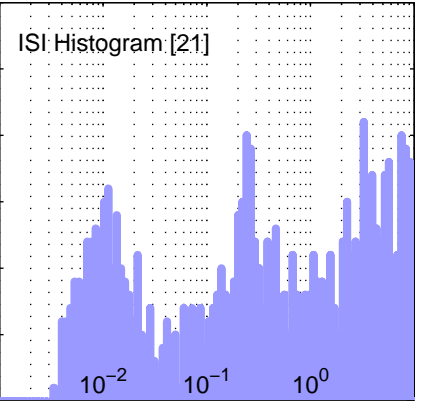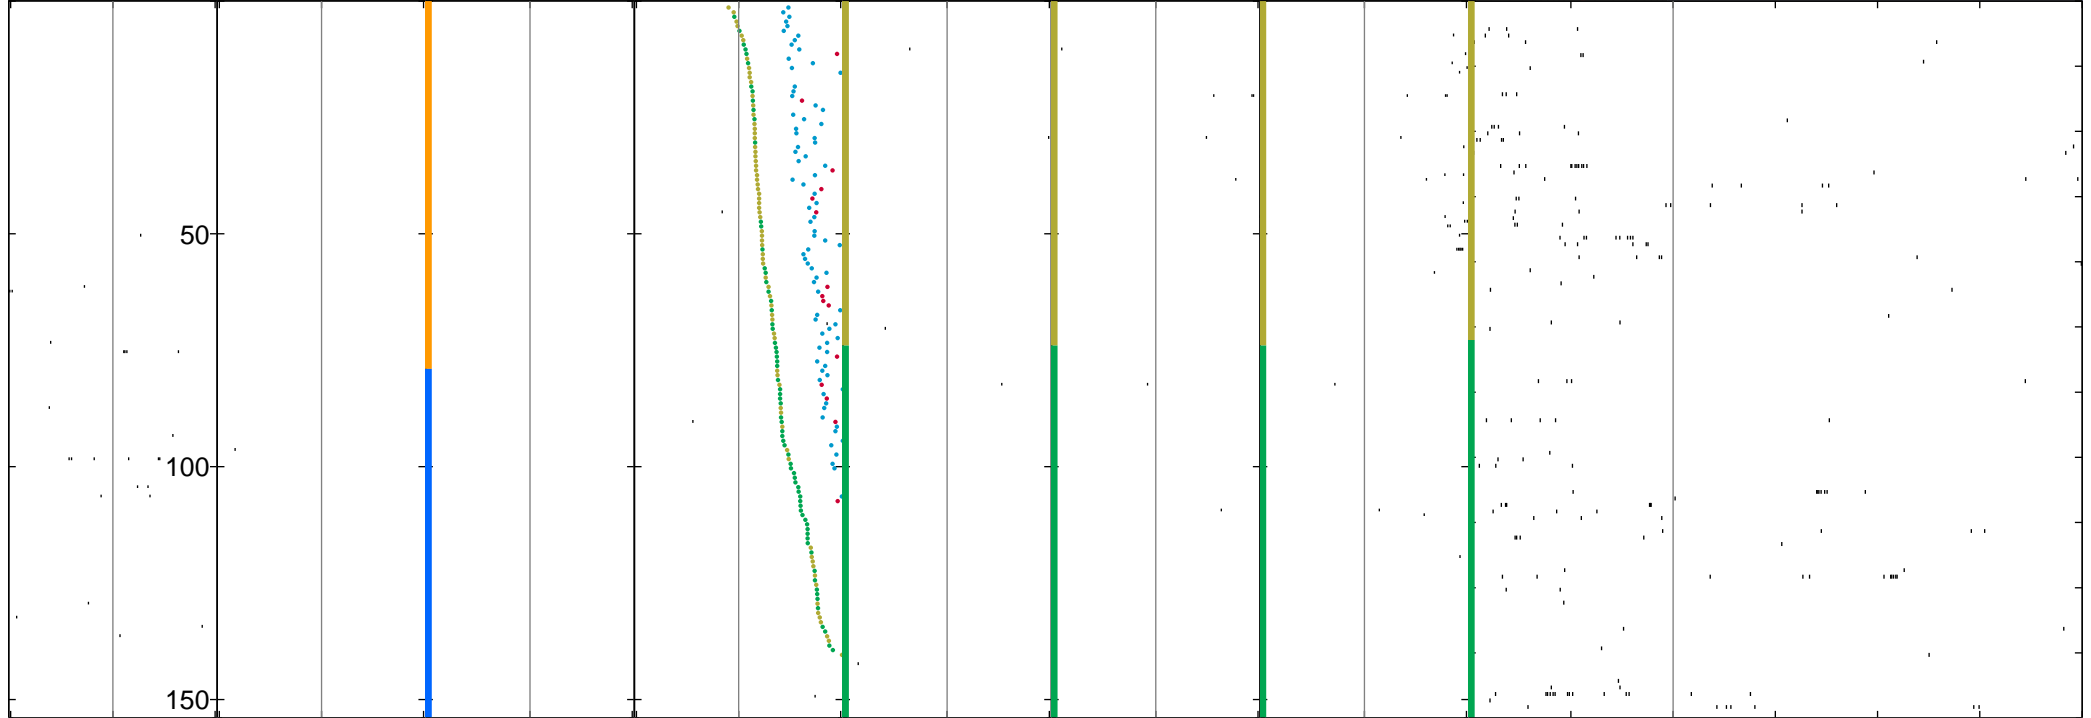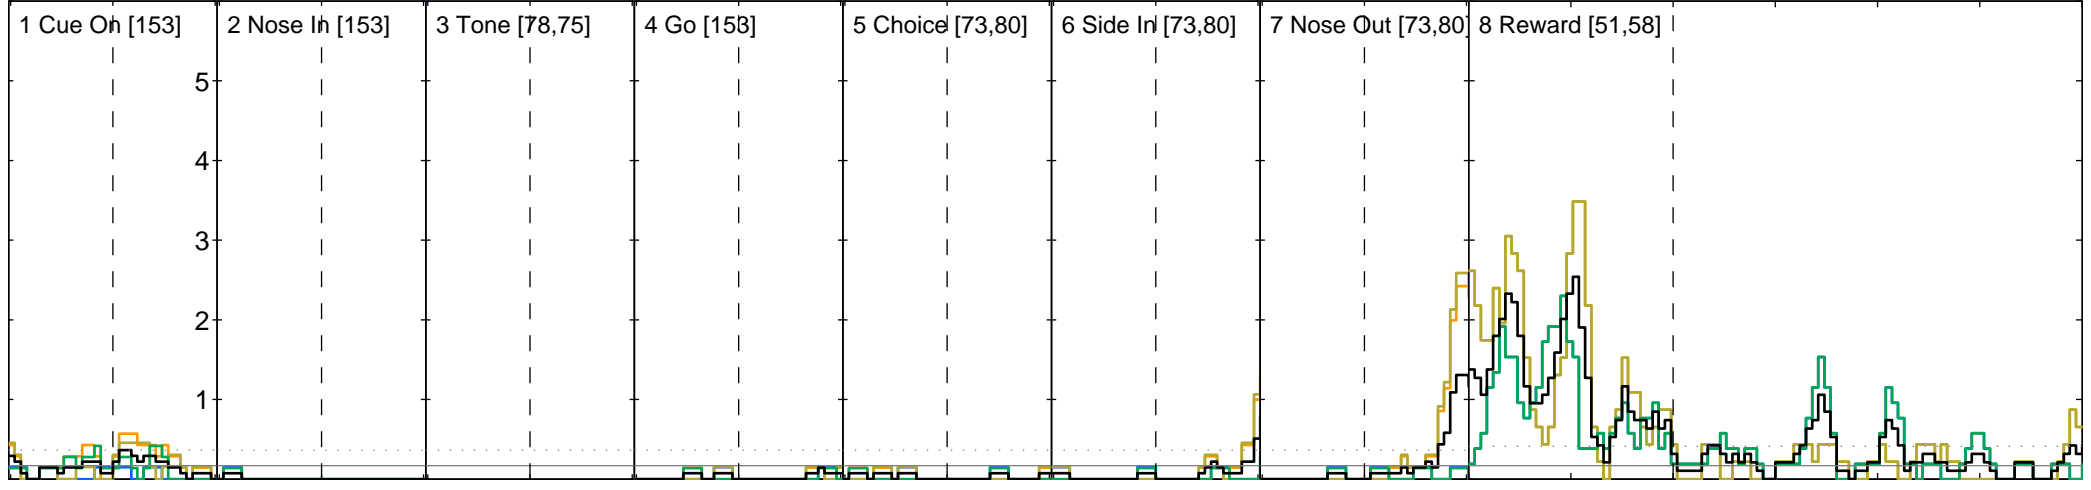

**Cell: C0320070613T07b**

AP: 0.96 ML: 3.6 DV: 5.3

w: 4 n: 86  $P_{ISI>2}$ : 1

1/2pw: 218 $\mu$ s p->v: 827 $\mu$ s

$\beta_T$ : NaN  $\beta_D$ : NaN

$\beta_P$ : NaN SI: NaN

Session FR: 0.0221 Hz

Pk Ev: None

Pk FR: --

MSN

Waveform

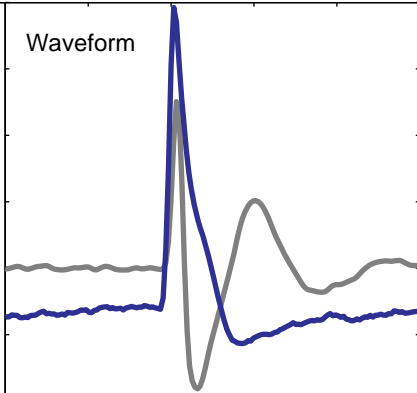

HP/PV

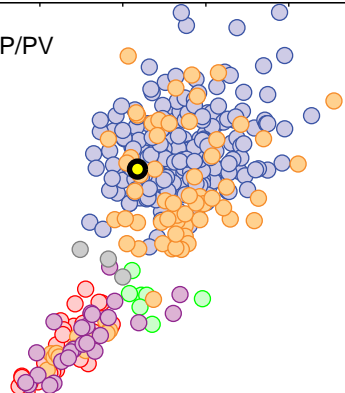

FR/PV

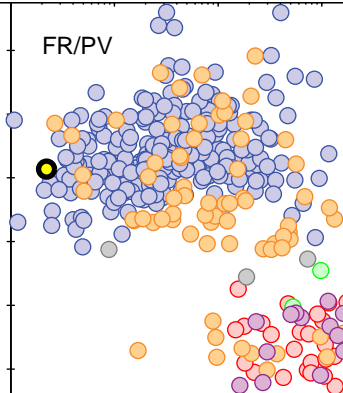

ISI Histogram [3]

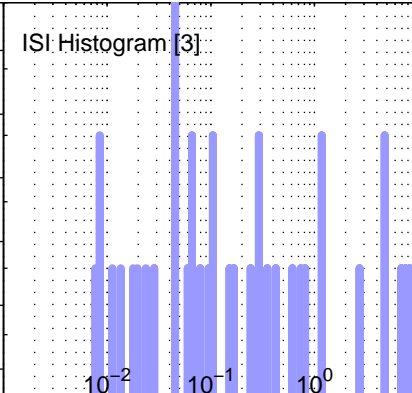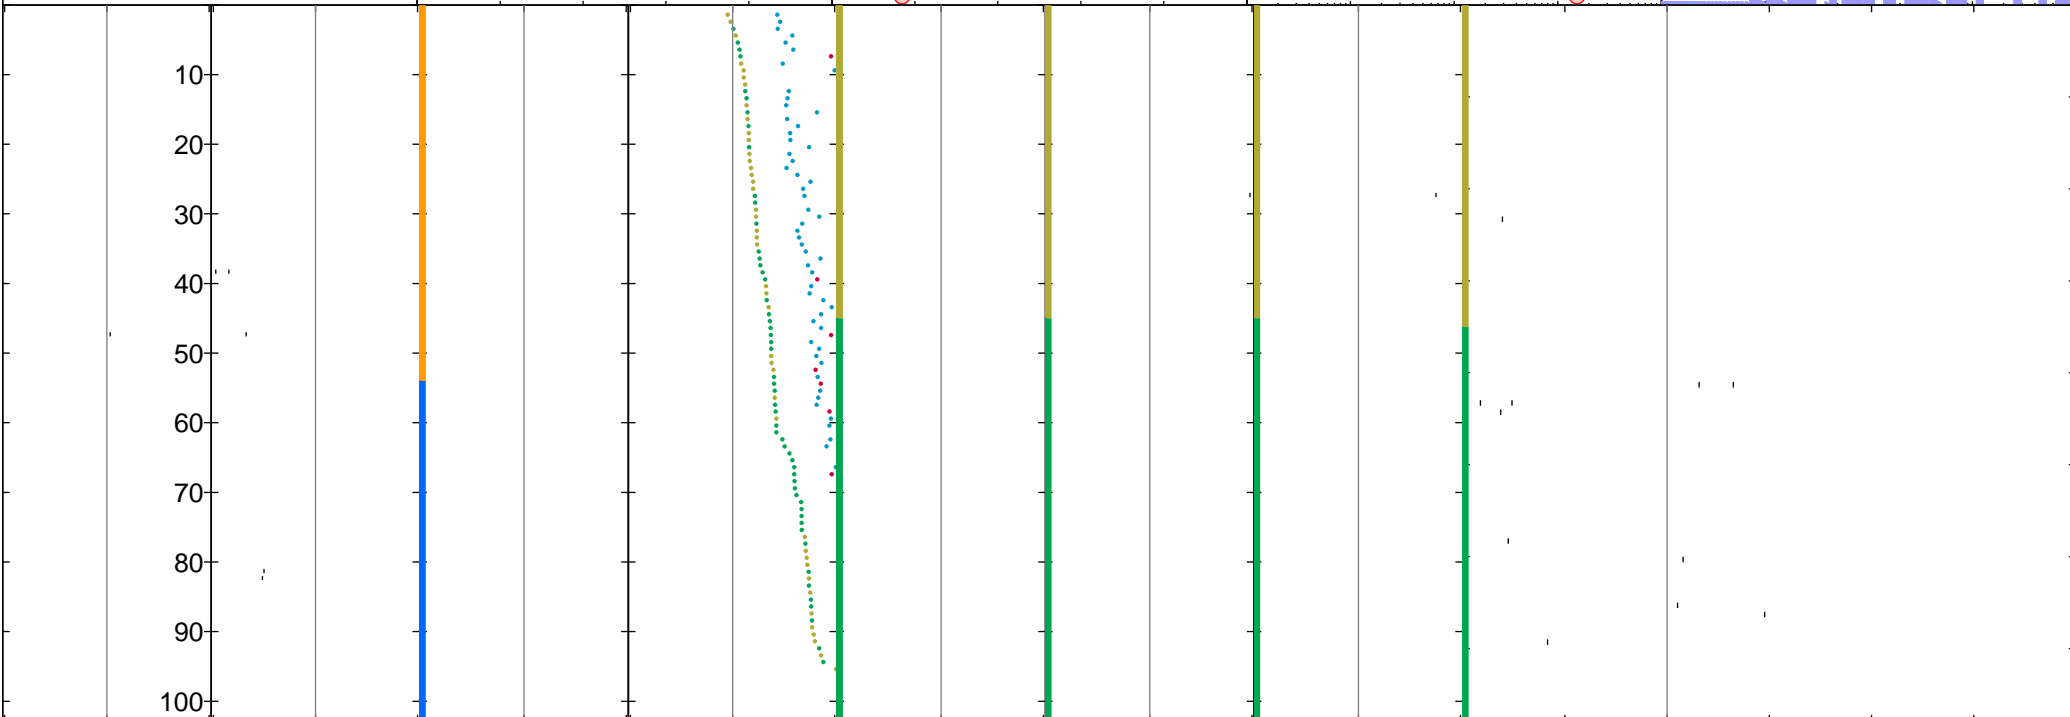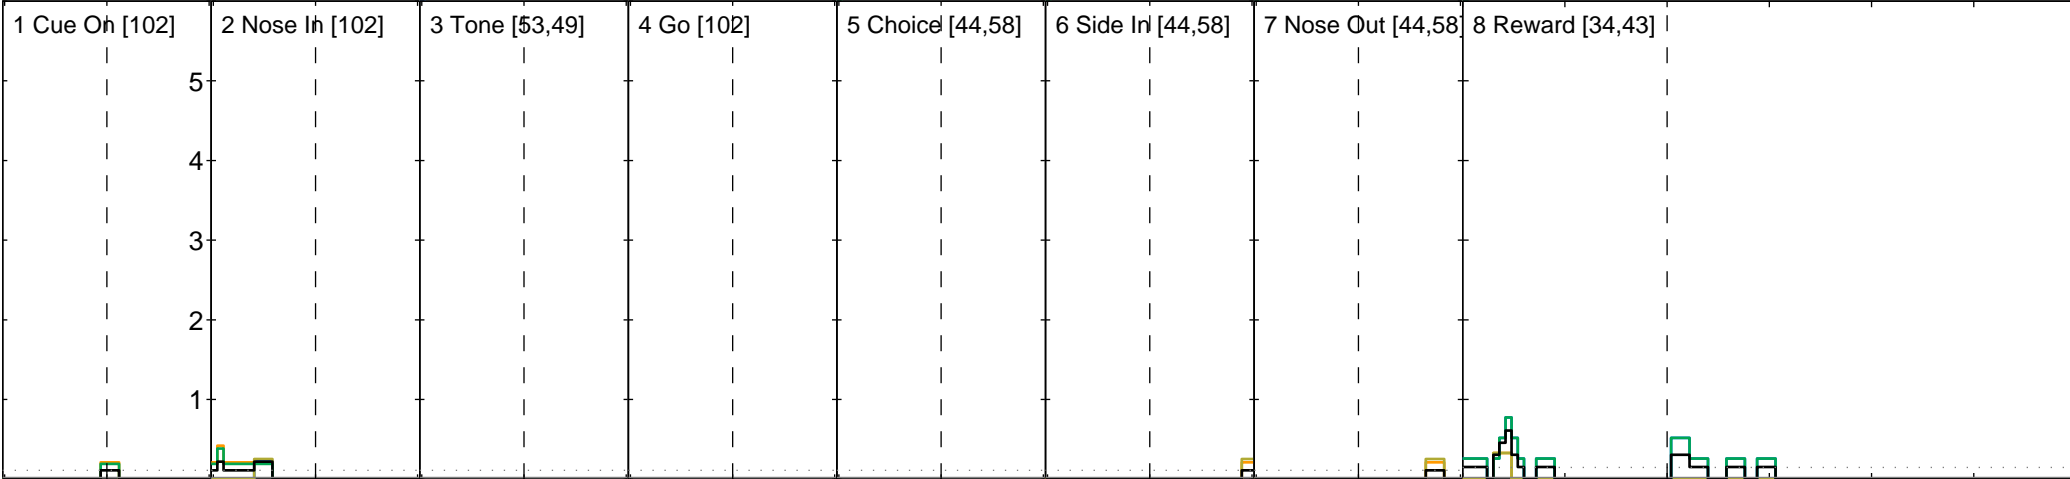

**Cell: C0320070613T07d**

AP: 0.96 ML: 3.6 DV: 5.3

w: 3 n: 1219  $P_{ISI>2}$ : 0.941/2pw: 214 $\mu$ s p->v: 800 $\mu$ s $\beta_T$ : NaN  $\beta_D$ : NaN $\beta_P$ : NaN SI: NaN

Session FR: 0.315 Hz

Pk Ev: None

Pk FR: --

MSN

Waveform

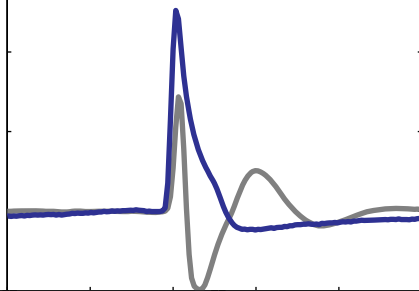

HP/PV

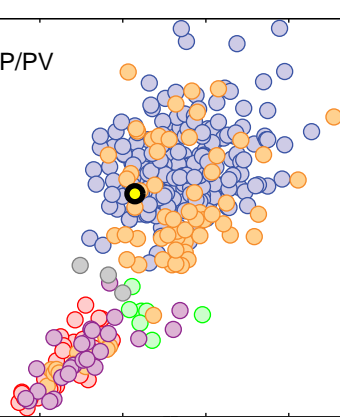

FR/PV

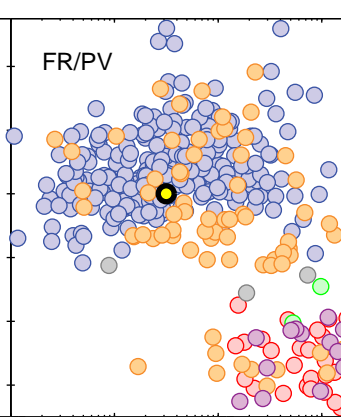

ISI Histogram [28]

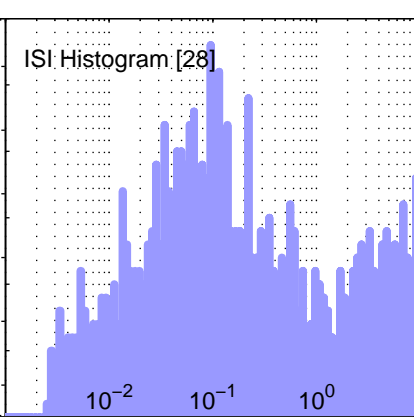10  
20  
30  
40  
50  
60  
70  
80  
90  
100

1 Cue On [102]

2 Nose In [102]

3 Tone [53,49]

4 Go [102]

5 Choice [44,58]

6 Side In [44,58]

7 Nose Out [44,58]

8 Reward [34,43]

5  
4  
3  
2  
1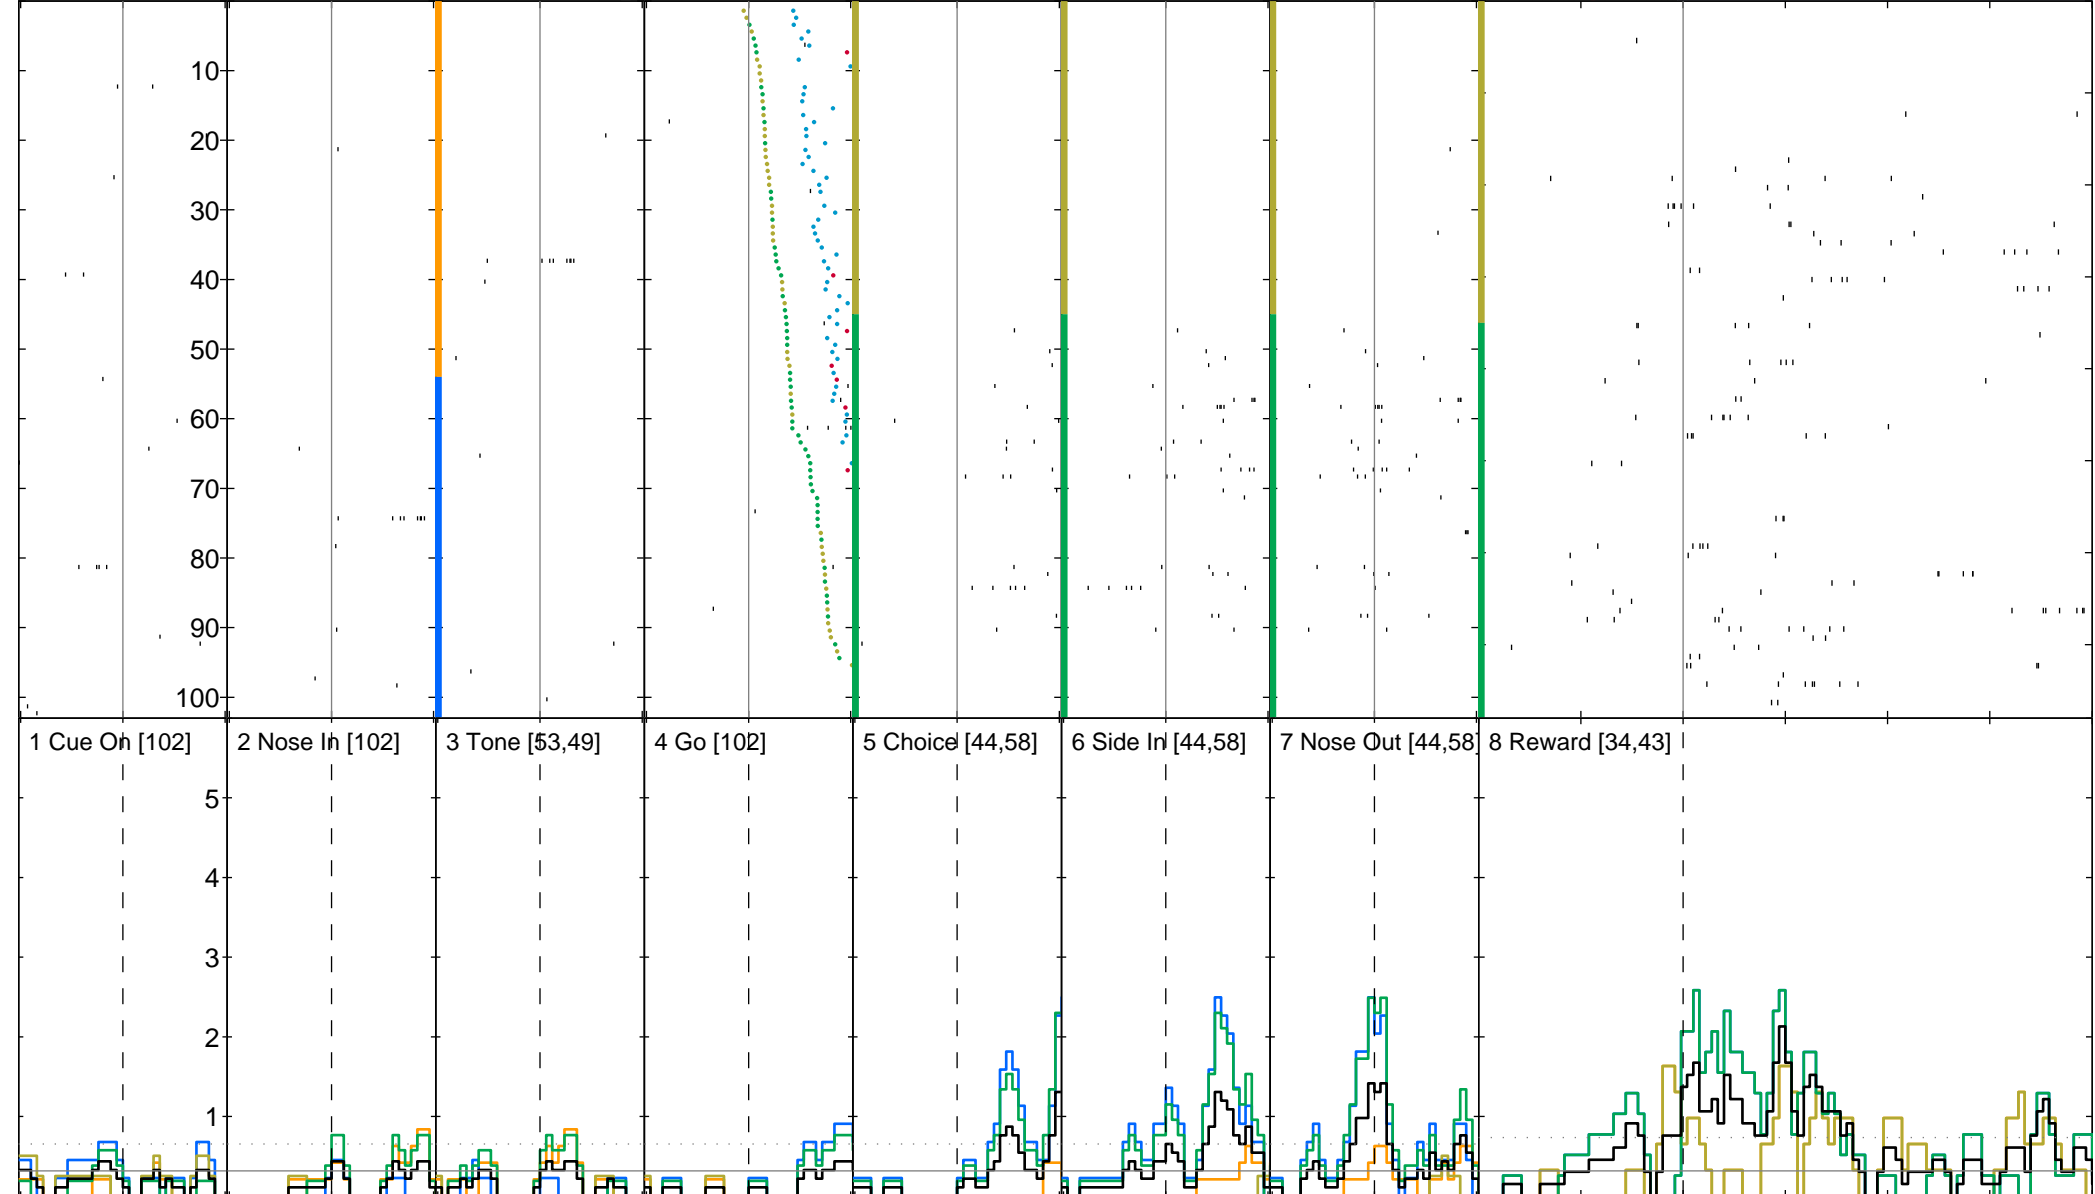

**Cell: C0320070613T09a**

AP: 1.6 ML: 3.7 DV: 4.7  
w: 1 n: 722  $P_{ISI>2}$ : 0.95  
1/2pw: 242 $\mu$ s p->v: 861 $\mu$ s  
 $\beta_T$ : NaN  $\beta_D$ : NaN  
 $\beta_P$ : NaN SI: NaN  
Session FR: 0.262 Hz  
Pk Ev: None  
Pk FR: --

**MSN**

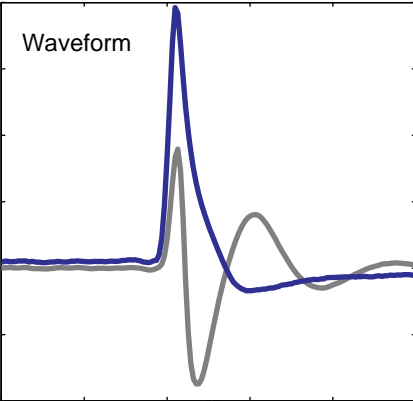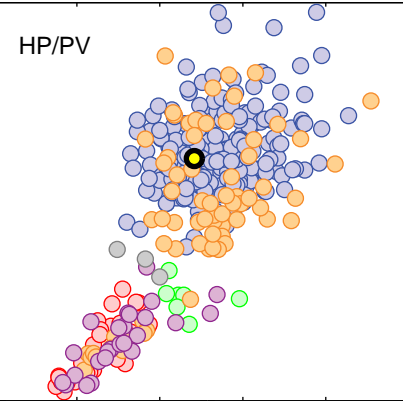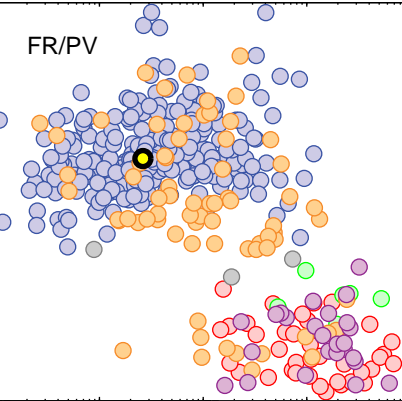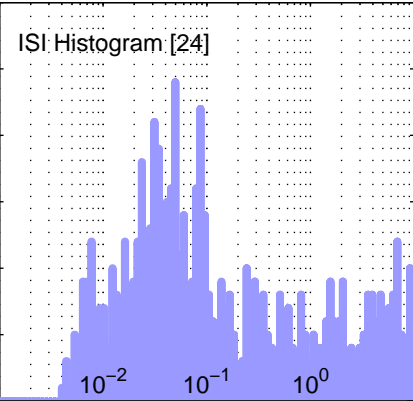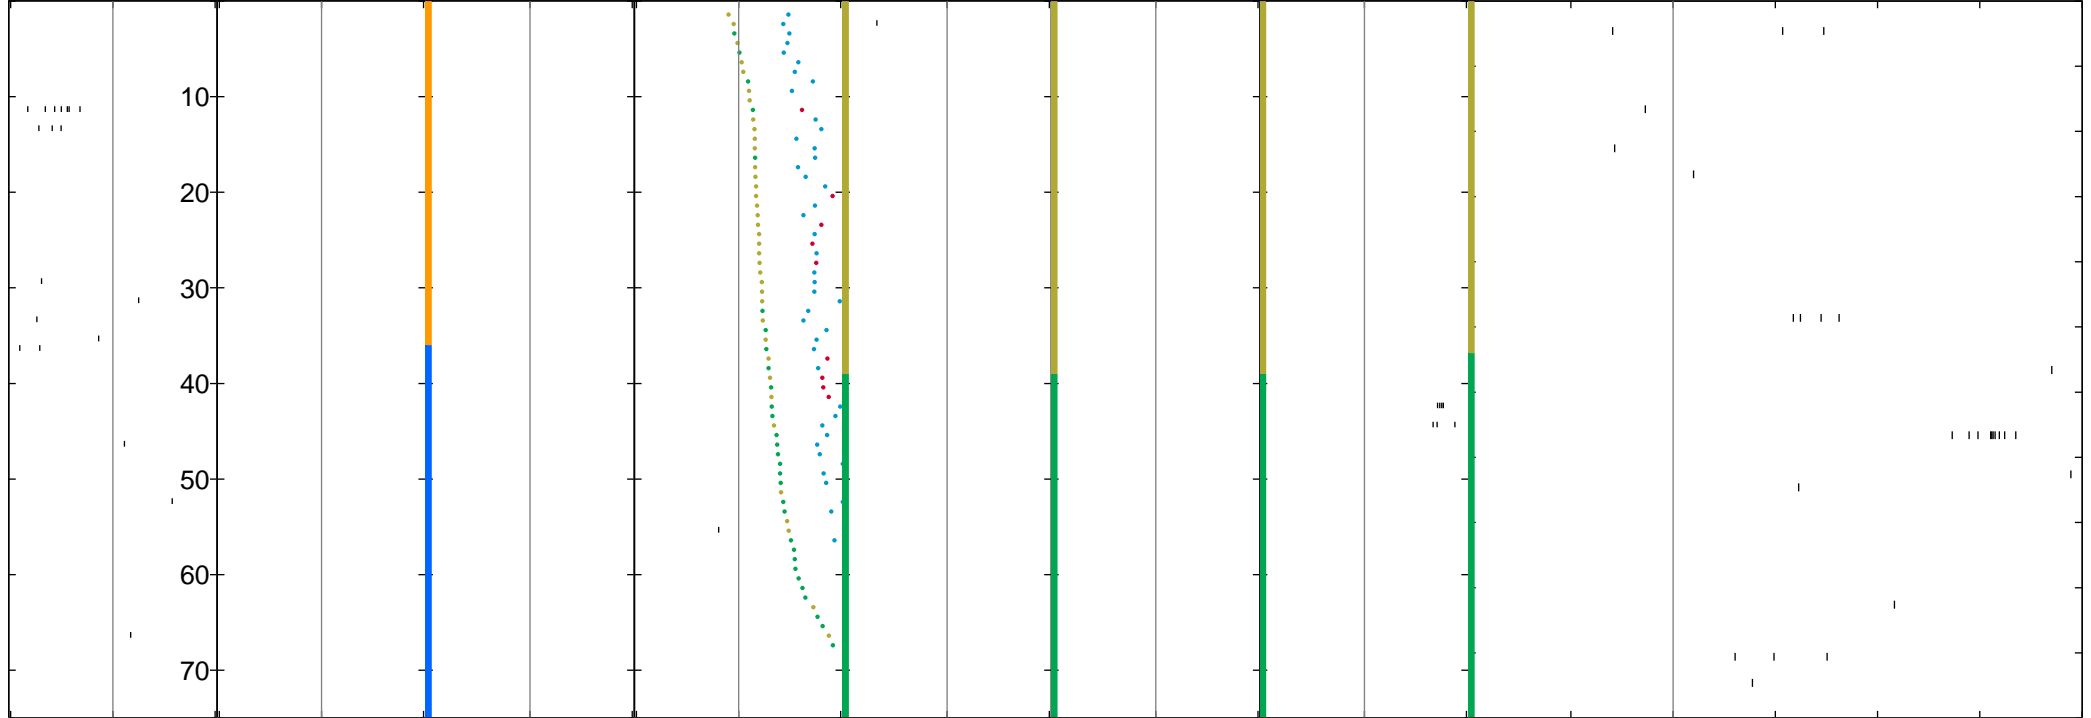

1 Cue On [74]    2 Nose In [74]    3 Tone [35,39]    4 Go [74]    5 Choice [38,36]    6 Side In [38,36]    7 Nose Out [38,36]    8 Reward [26,28]

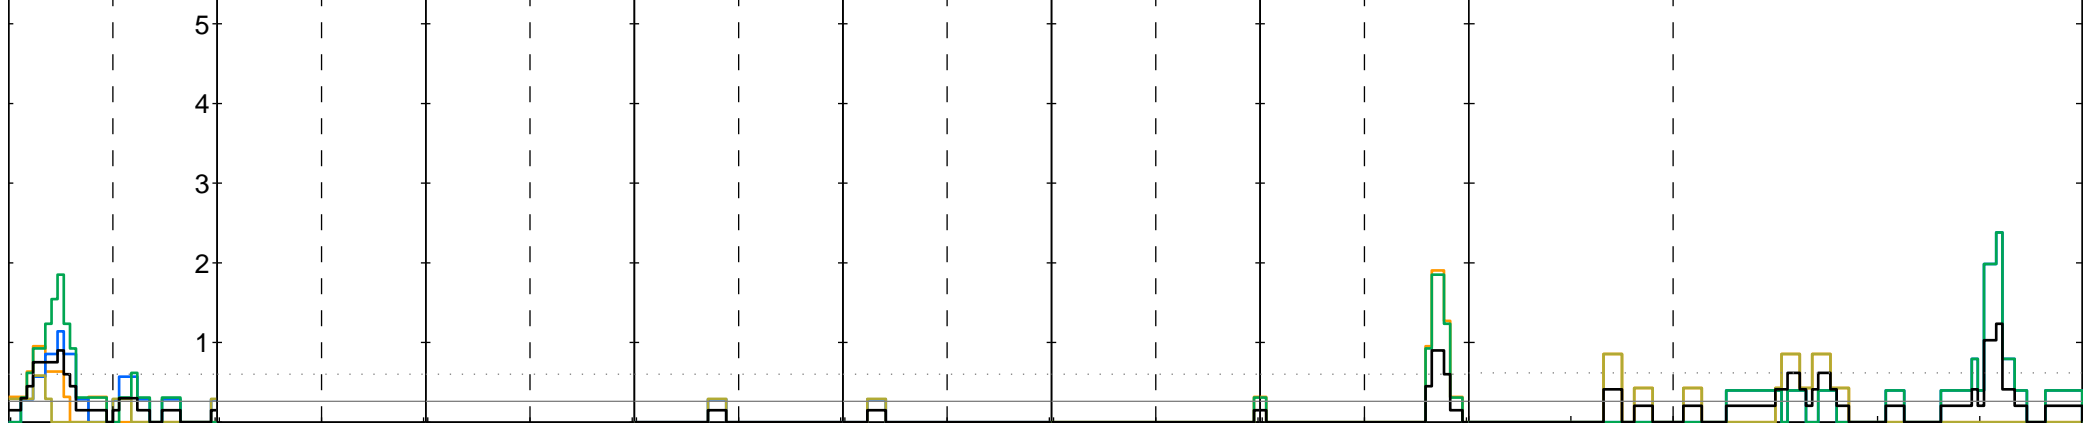

**Cell: C0320070613T09b**

AP: 1.6 ML: 3.7 DV: 4.7

w: 1 n: 4515  $P_{ISI>2}$ : 0.461/2pw: 296 $\mu$ s p $\rightarrow$ v: 797 $\mu$ s $\beta_T$ : NaN  $\beta_D$ : NaN $\beta_P$ : NaN SI: NaN

Session FR: 1.61 Hz

Pk Ev: None

Pk FR: --

MSN

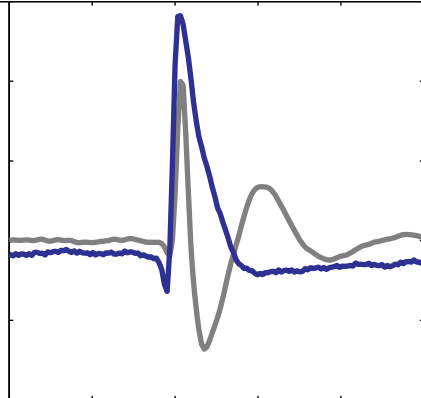

HP/PV

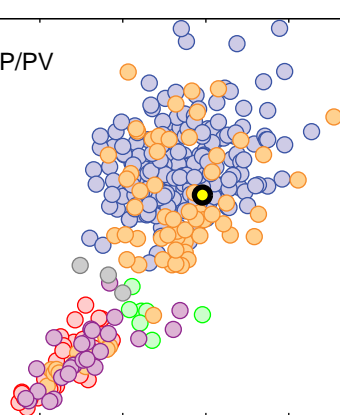

FR/PV

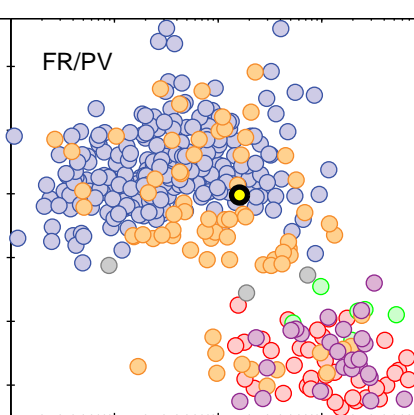

ISI Histogram [101]

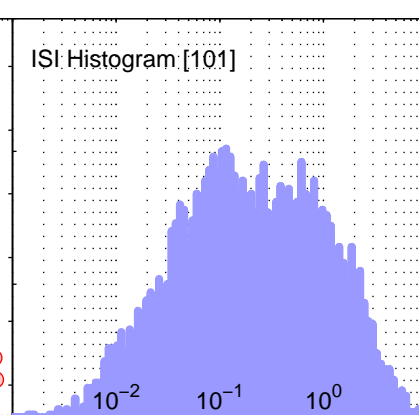10  
20  
30  
40  
50  
60  
70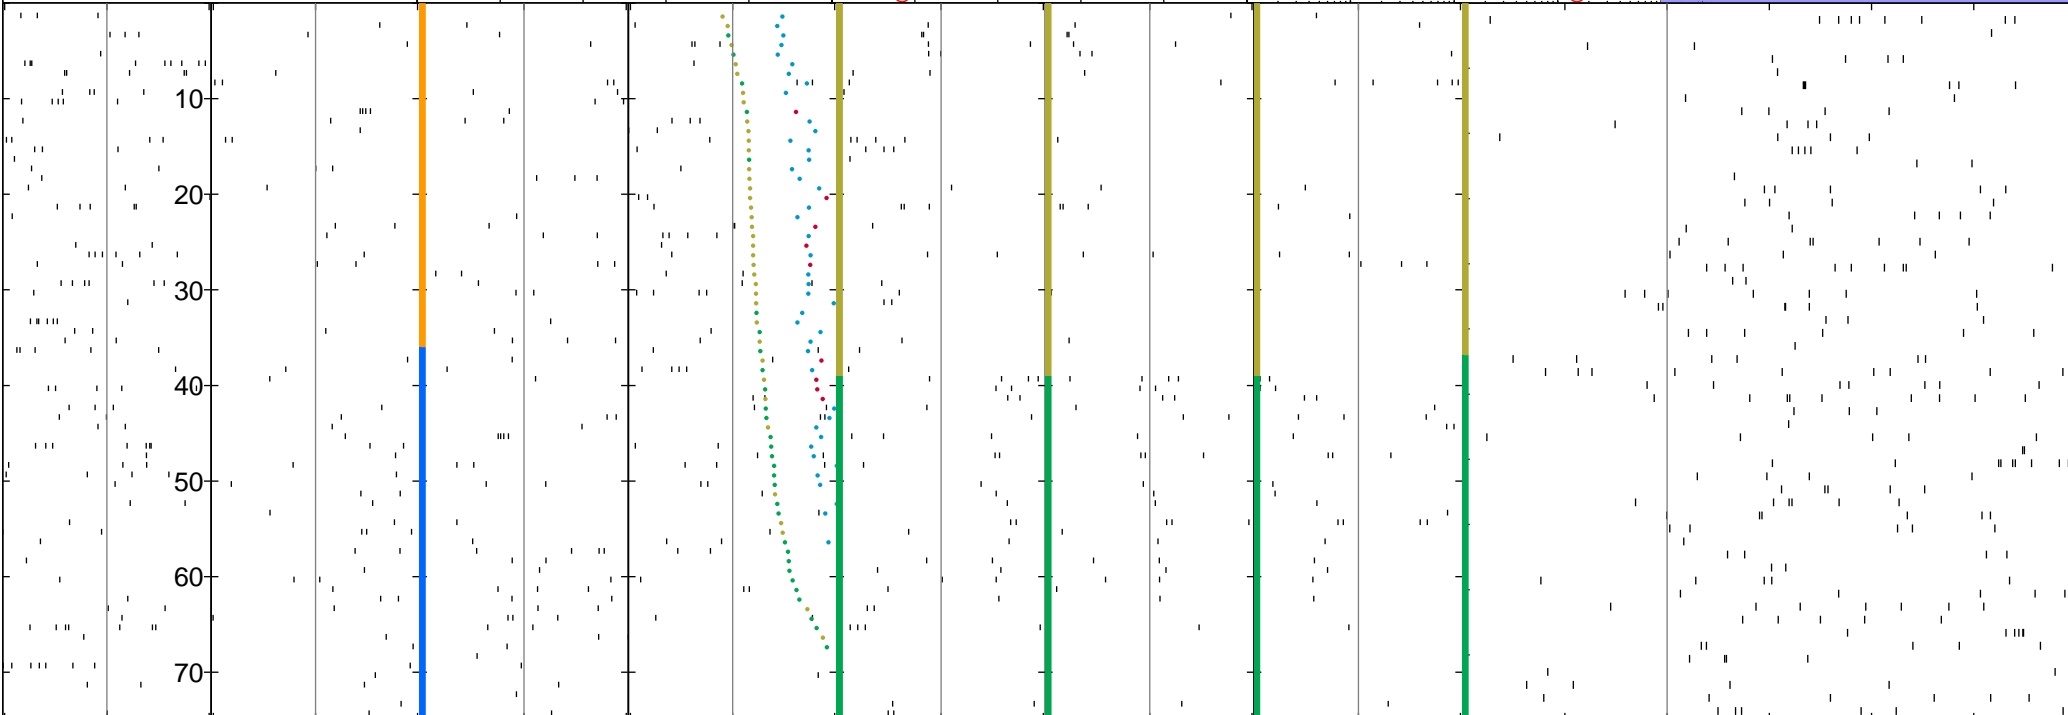

1 Cue On [74]

2 Nose In [74]

3 Tone [35,39]

4 Go [74]

5 Choice [38,36]

6 Side In [38,36]

7 Nose Out [38,36]

8 Reward [26,28]

5  
4  
3  
2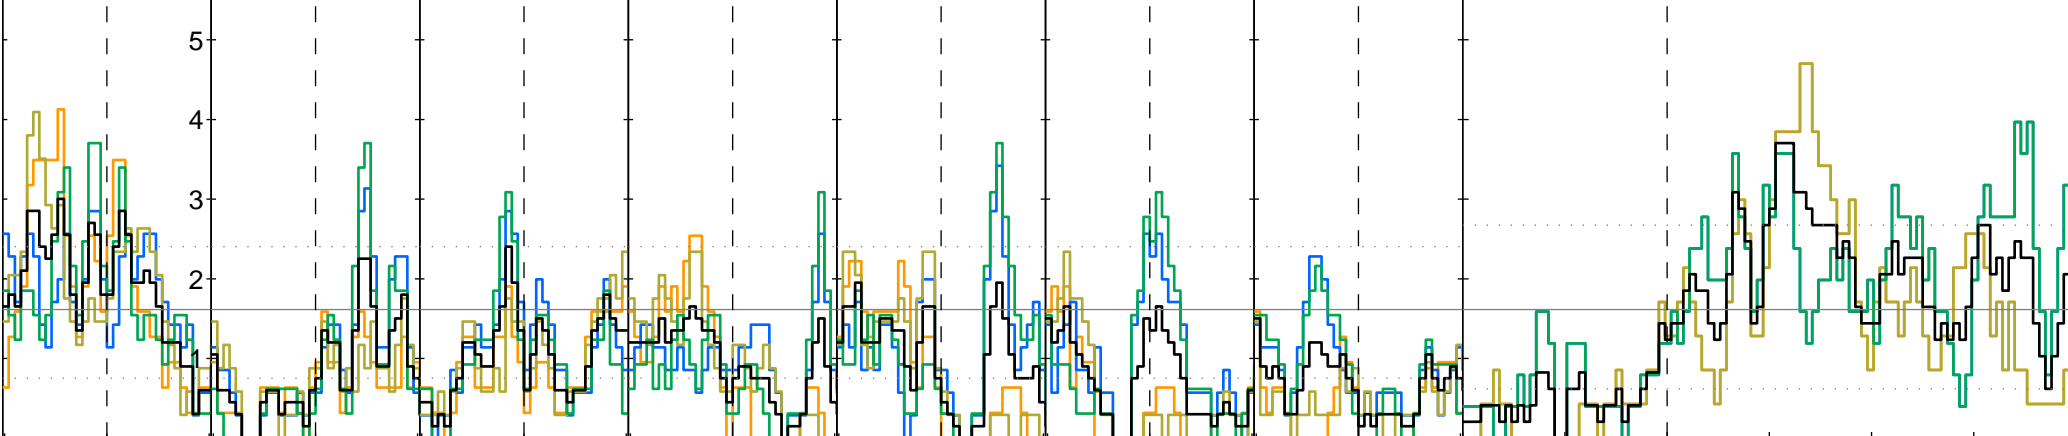

**Cell: C0320070613T09h**

AP: 1.6 ML: 3.7 DV: 4.7  
w: 4 n: 1171  $P_{ISI>2}$ : 0.95  
1/2pw: 216 $\mu$ s p->v: 960 $\mu$ s  
 $\beta_T$ : NaN  $\beta_D$ : NaN  
 $\beta_P$ : NaN SI: NaN  
Session FR: 0.42 Hz  
Pk Ev: None  
Pk FR: --

MSN

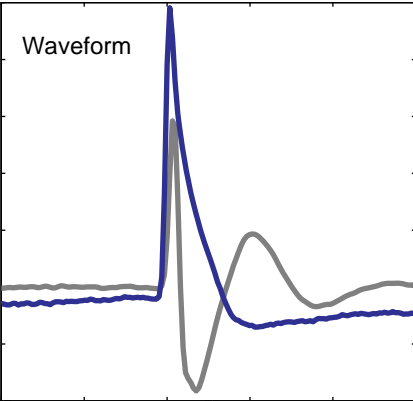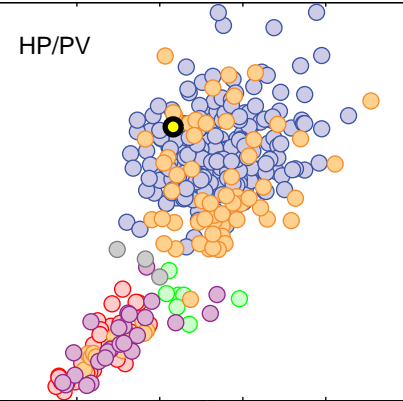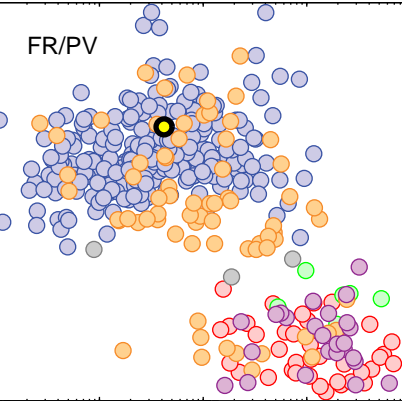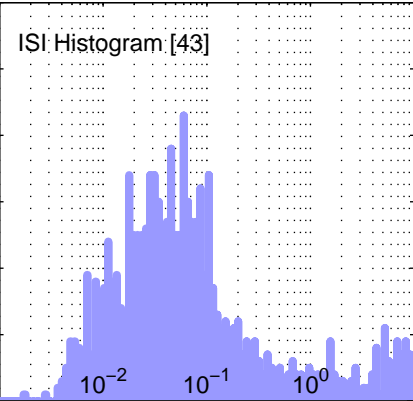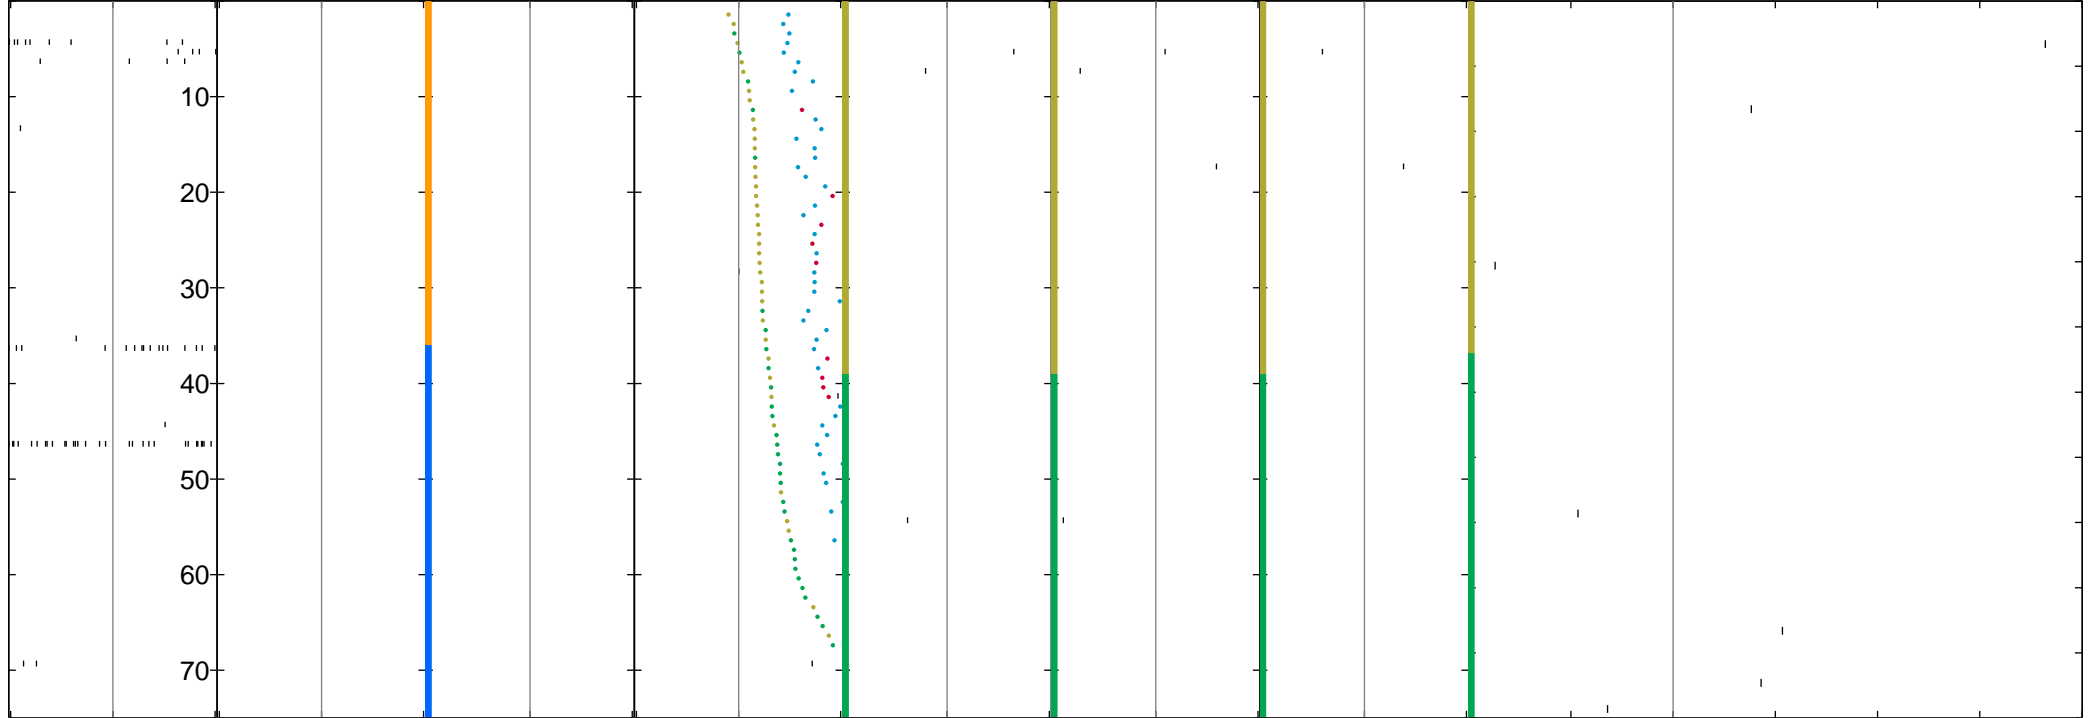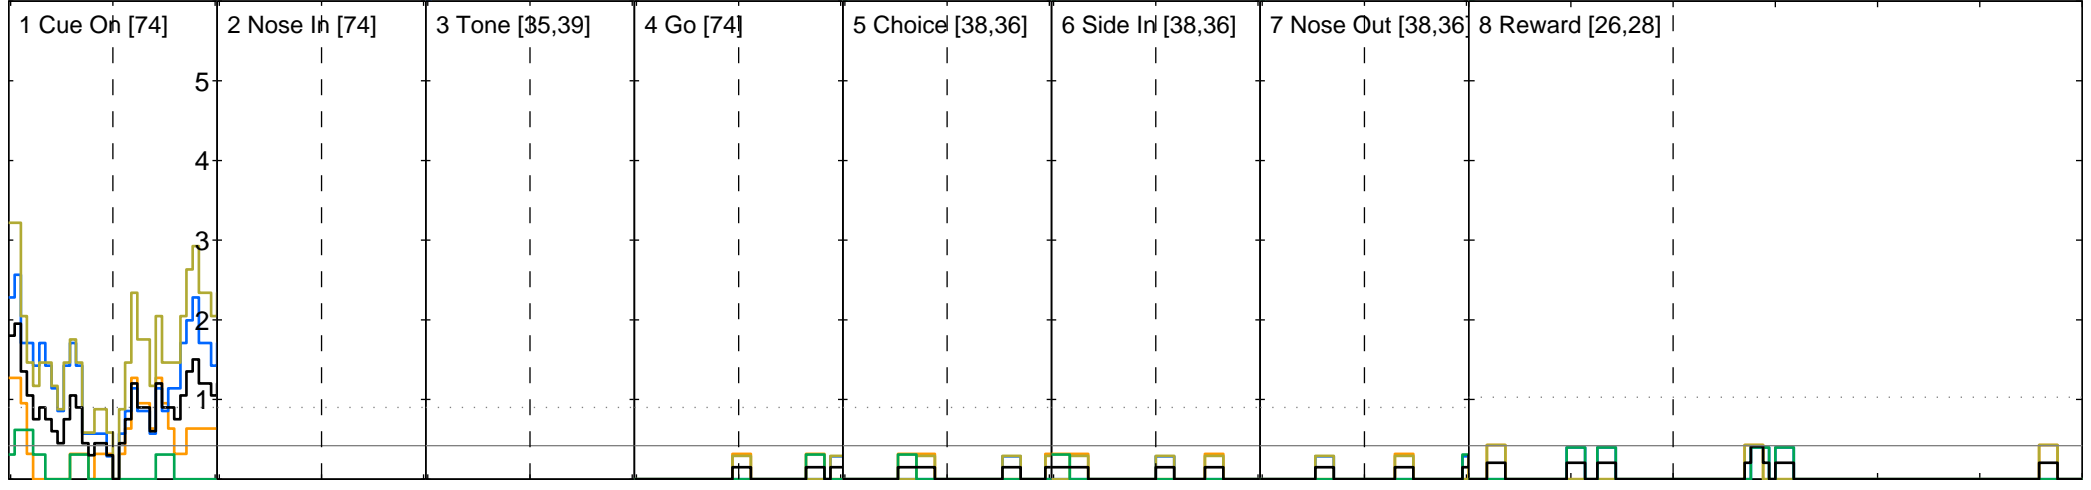



**Cell: C0320070618T07a**

AP: 0.96 ML: 3.6 DV: 5.6

w: 2 n: 94  $P_{ISI>2}$ : 1

1/2pw: 184 $\mu$ s p->v: 762 $\mu$ s

$\beta_T$ : NaN  $\beta_D$ : NaN

$\beta_P$ : NaN SI: NaN

Session FR: 0.0211 Hz

Pk Ev: None

Pk FR: --

MSN

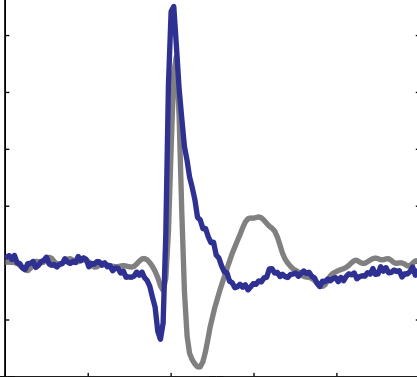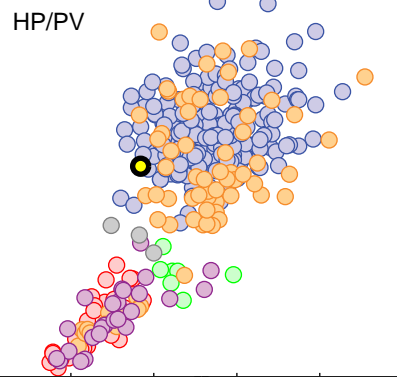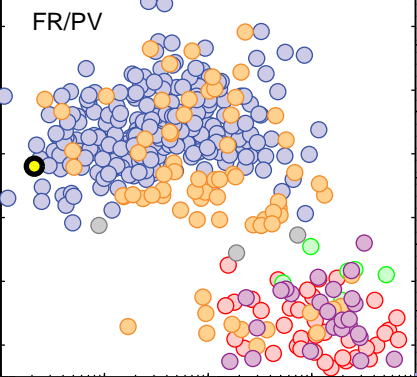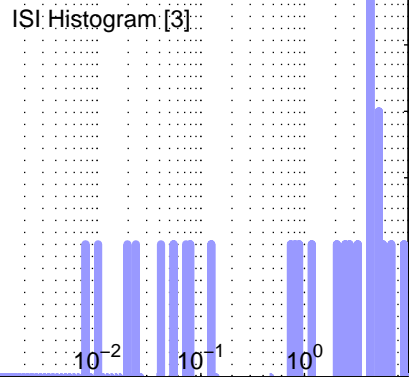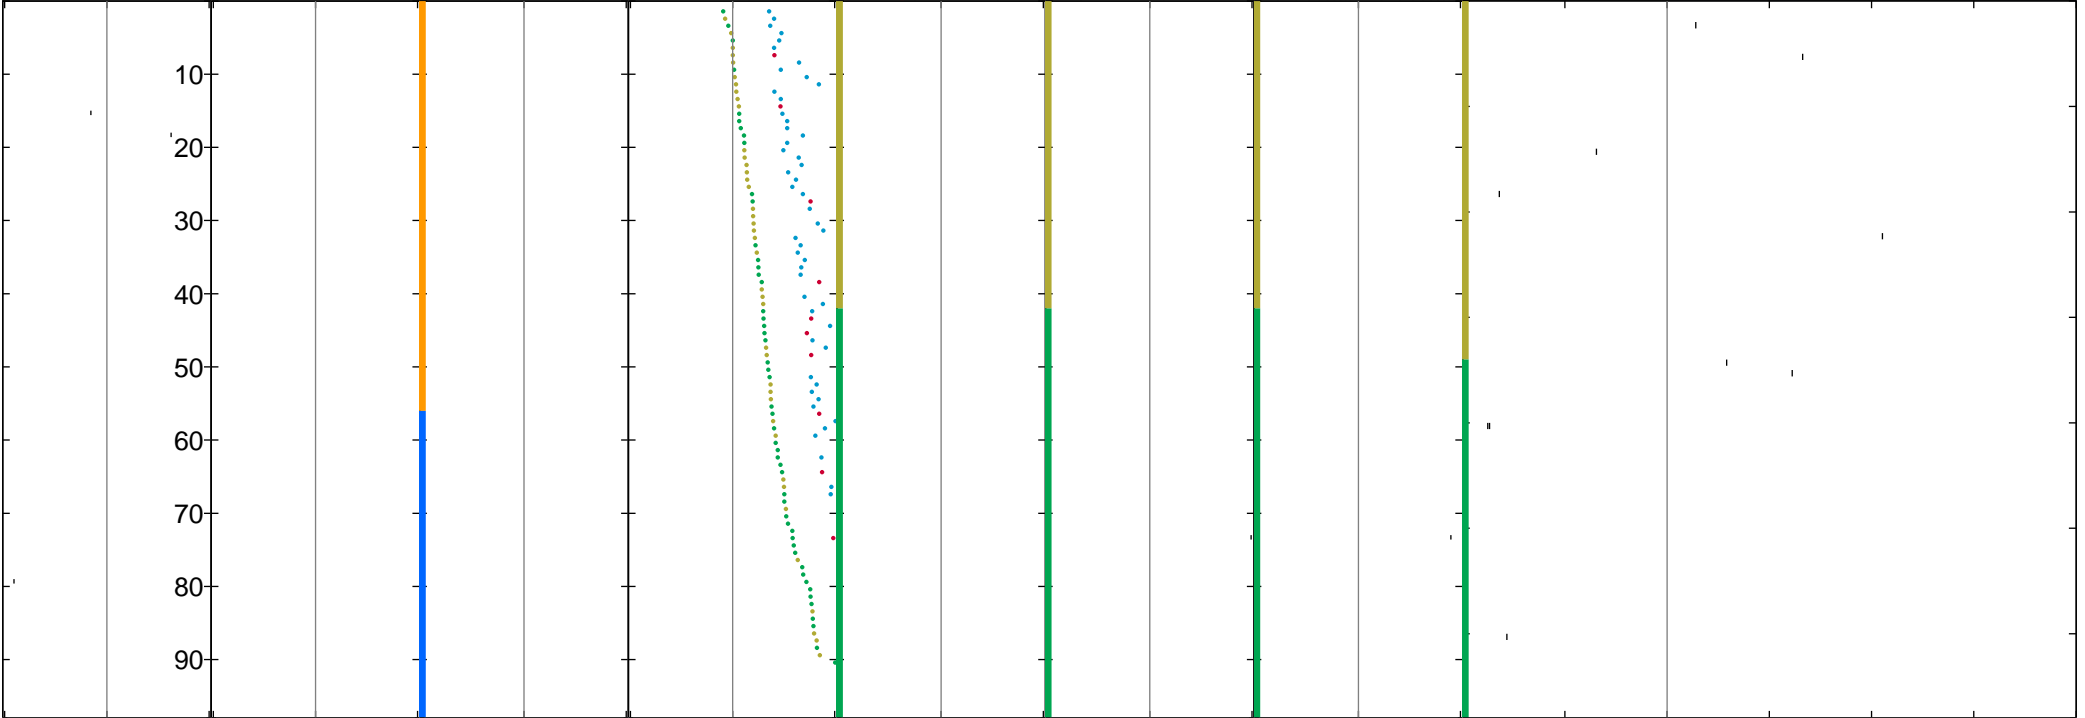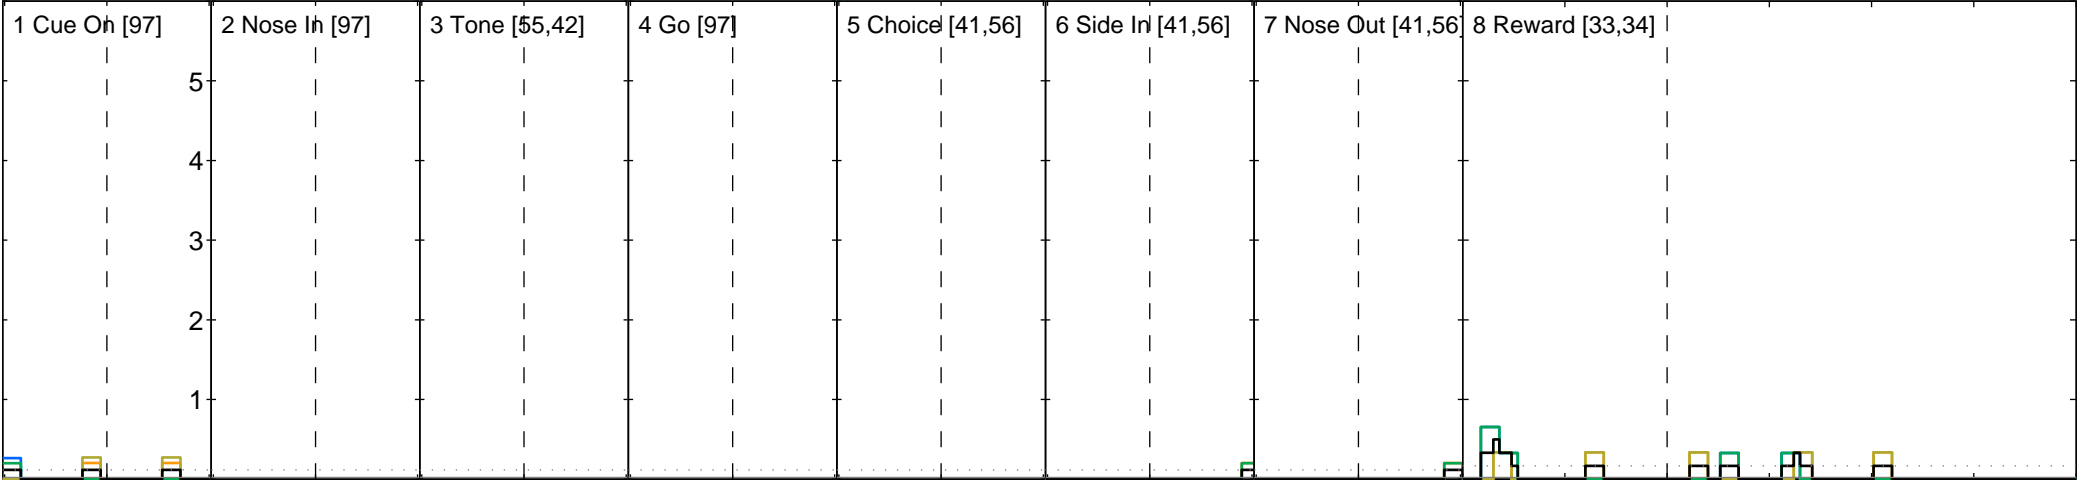

**Cell: C0320070618T07c**

AP: 0.96 ML: 3.6 DV: 5.6  
w: 3 n: 3517  $P_{ISI>2}$ : 0.85  
1/2pw: 256 $\mu$ s p->v: 878 $\mu$ s  
 $\beta_T$ : NaN  $\beta_D$ : NaN  
 $\beta_P$ : NaN SI: NaN  
Session FR: 0.702 Hz  
Pk Ev: None  
Pk FR: --

MSN

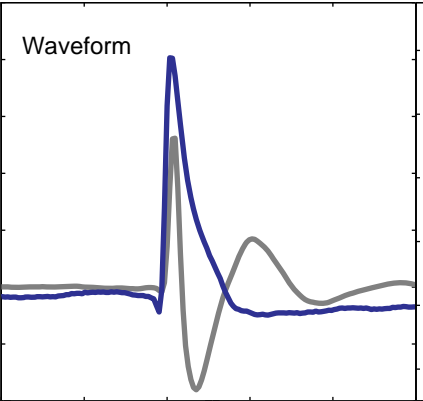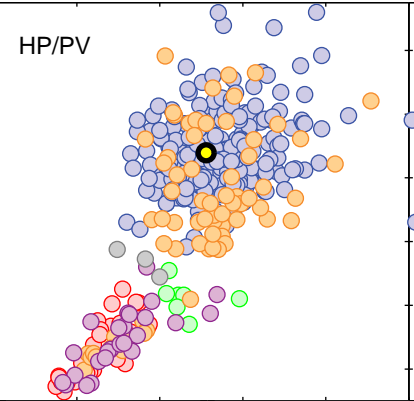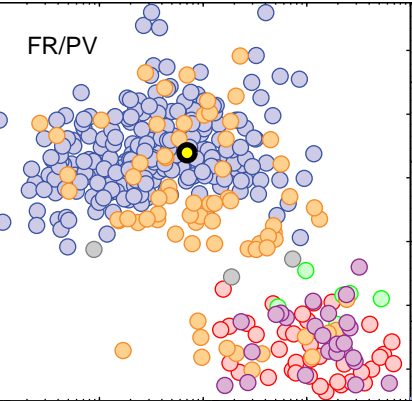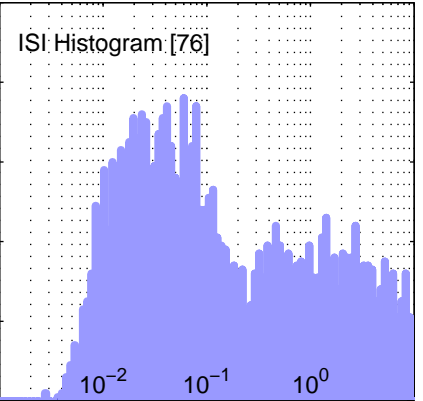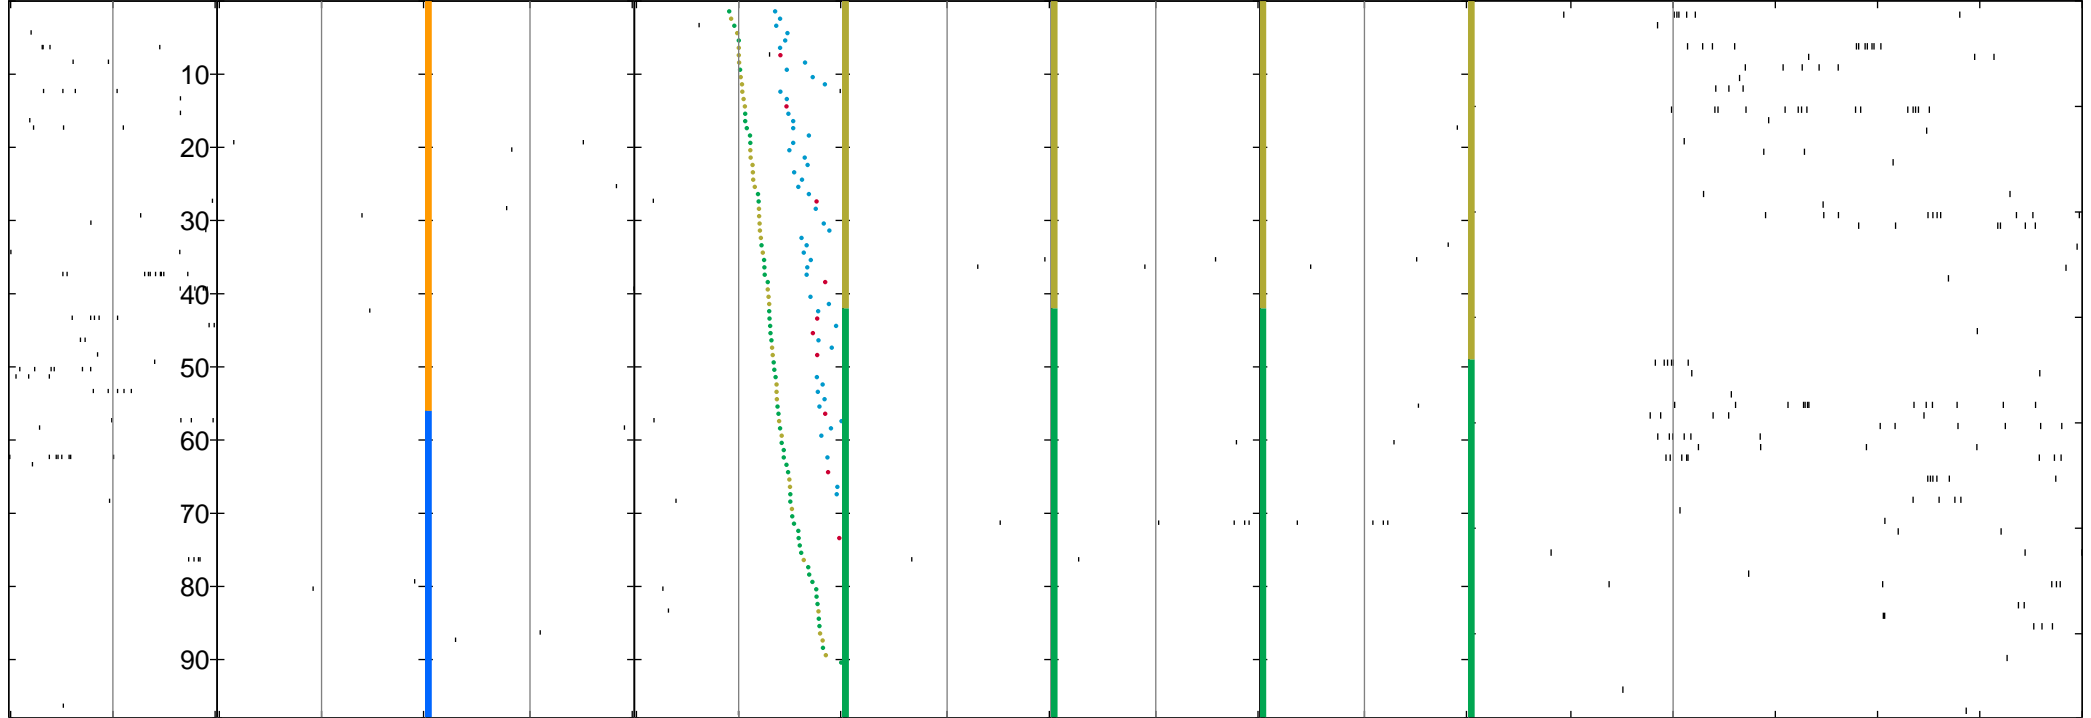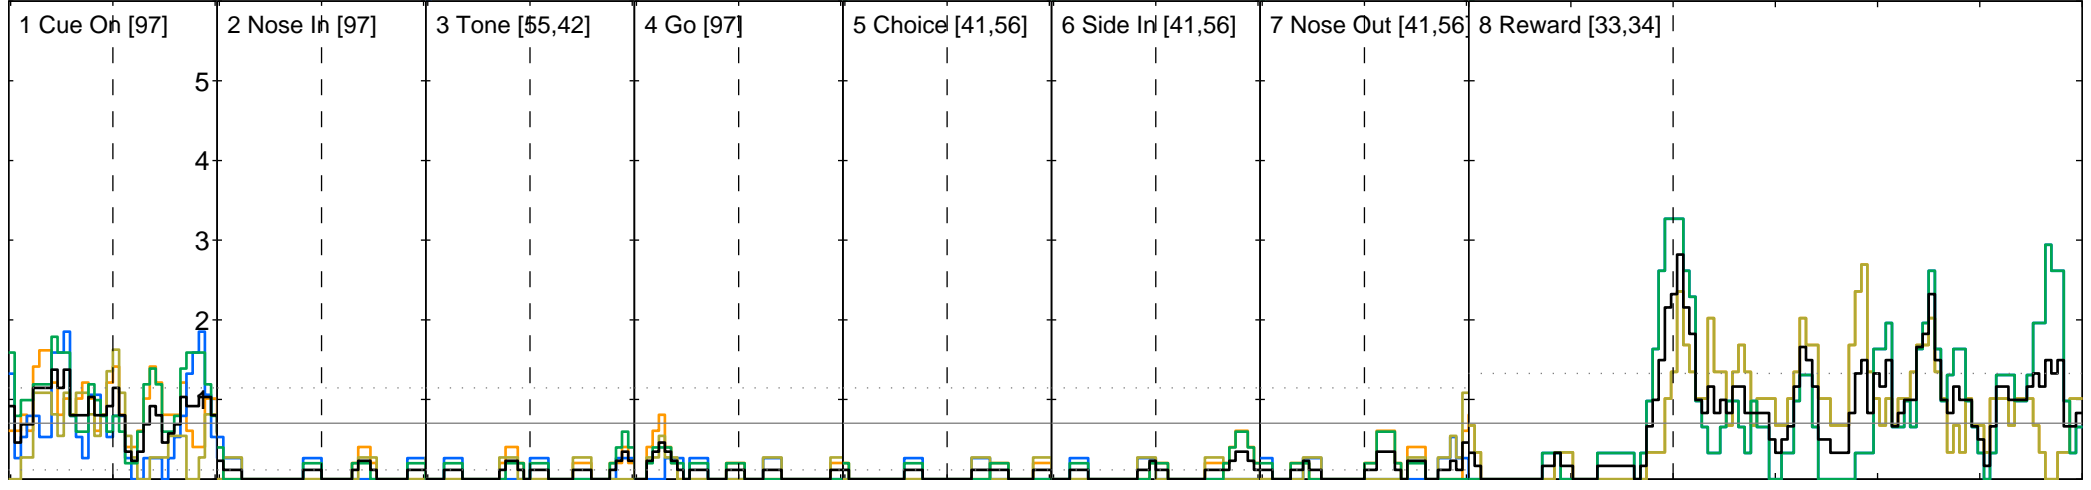

**Cell: C0320070618T07d**

AP: 0.96 ML: 3.6 DV: 5.6

w: 2 n: 606  $P_{ISI>2}$ : 0.98

1/2pw: 234 $\mu$ s p->v: 877 $\mu$ s

$\beta_T$ : NaN  $\beta_D$ : NaN

$\beta_P$ : NaN SI: NaN

Session FR: 0.121 Hz

Pk Ev: None

Pk FR: --

**MSN**

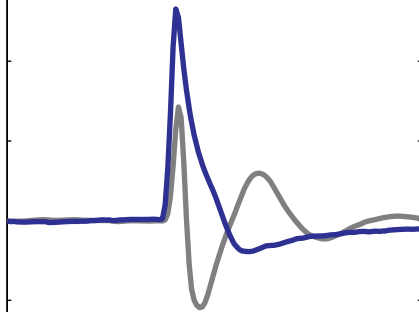

HP/PV

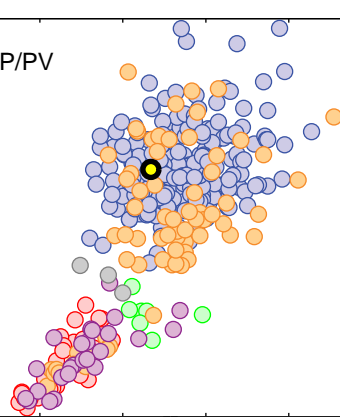

FR/PV

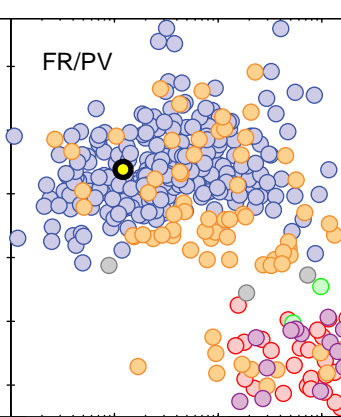

ISI Histogram [13]

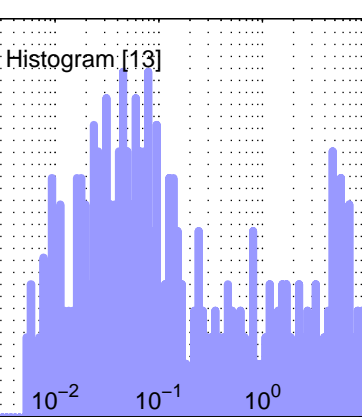

10  
20  
30  
40  
50  
60  
70  
80  
90

1 Cue On [97]

2 Nose In [97]

3 Tone [55,42]

4 Go [97]

5 Choice [41,56]

6 Side In [41,56]

7 Nose Out [41,56]

8 Reward [33,34]

5  
4  
3  
2  
1

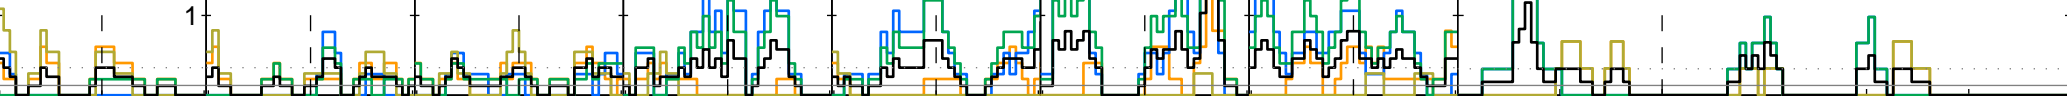

**Cell: C0320070618T07e**

AP: 0.96 ML: 3.6 DV: 5.6  
w: 2 n: 325  $P_{ISI>2}$ : 0.99  
1/2pw: 194 $\mu$ s p->v: 829 $\mu$ s  
 $\beta_T$ : NaN  $\beta_D$ : NaN  
 $\beta_P$ : NaN SI: NaN  
Session FR: 0.0674 Hz  
Pk Ev: None  
Pk FR: --

MSN

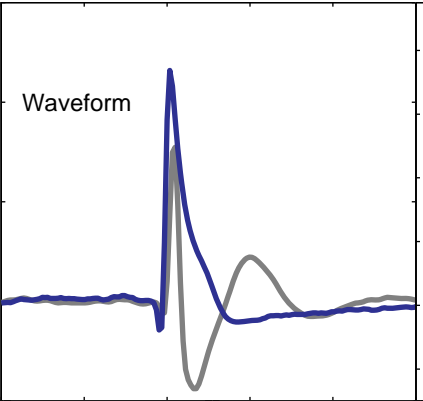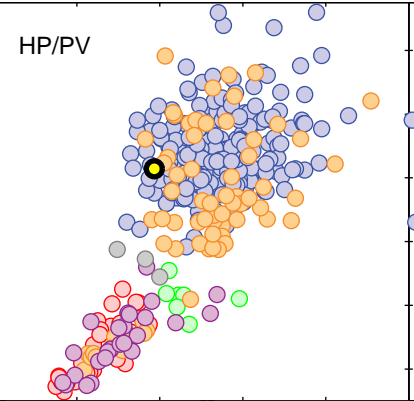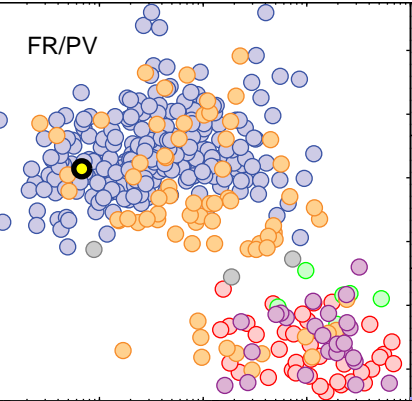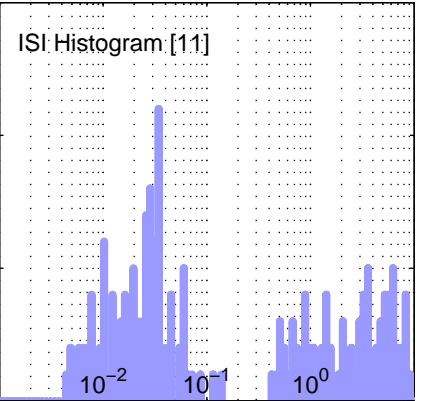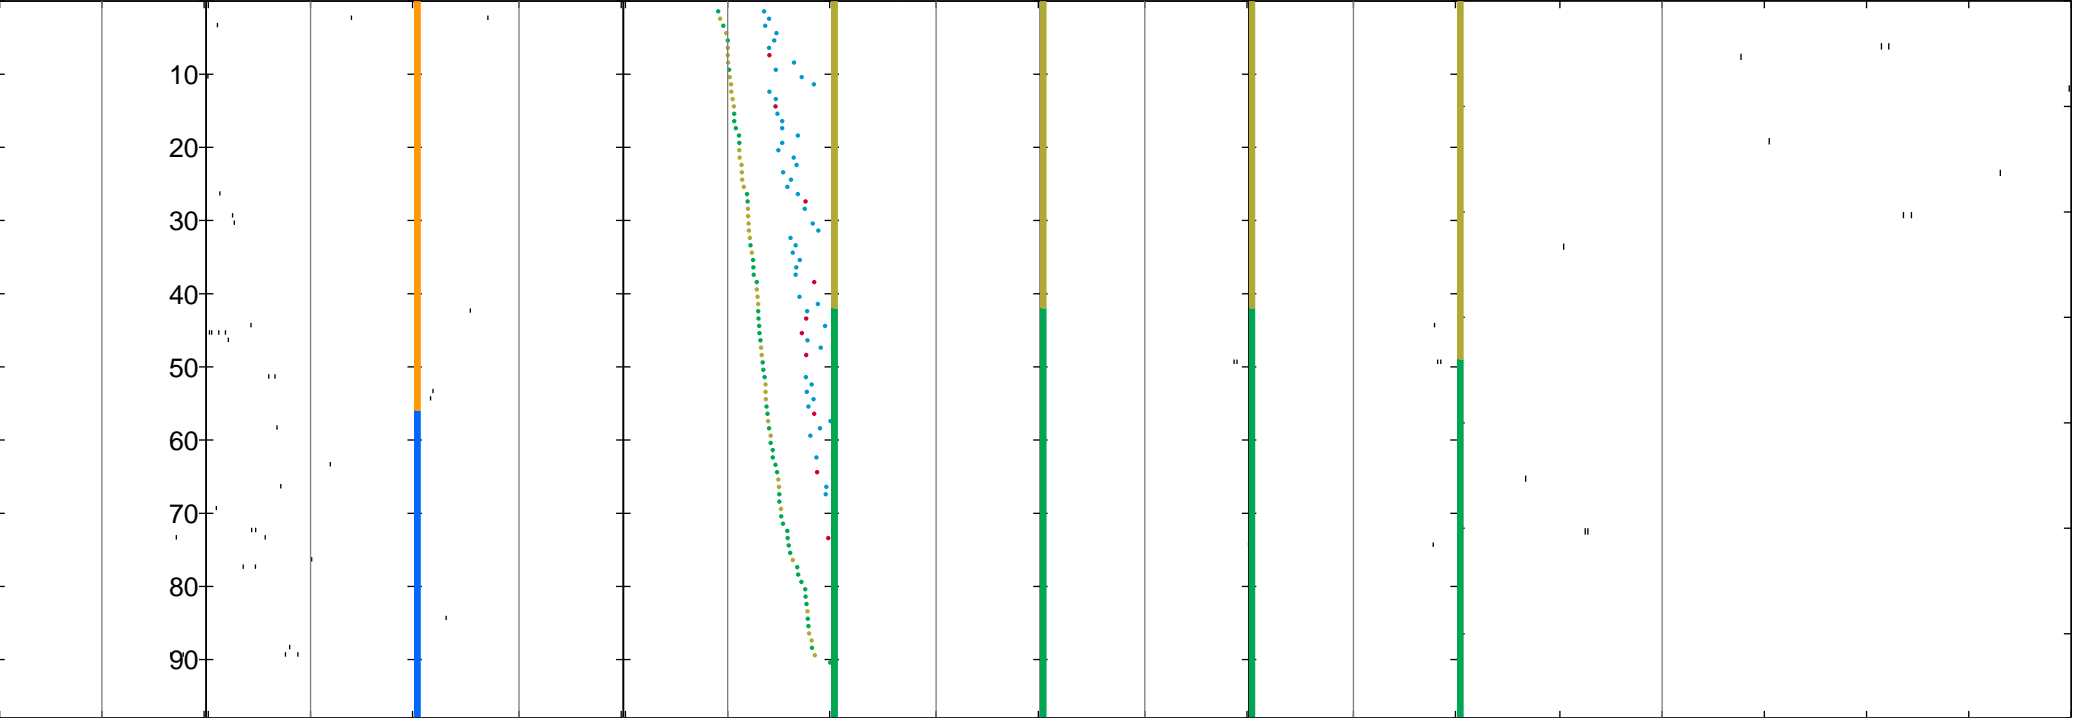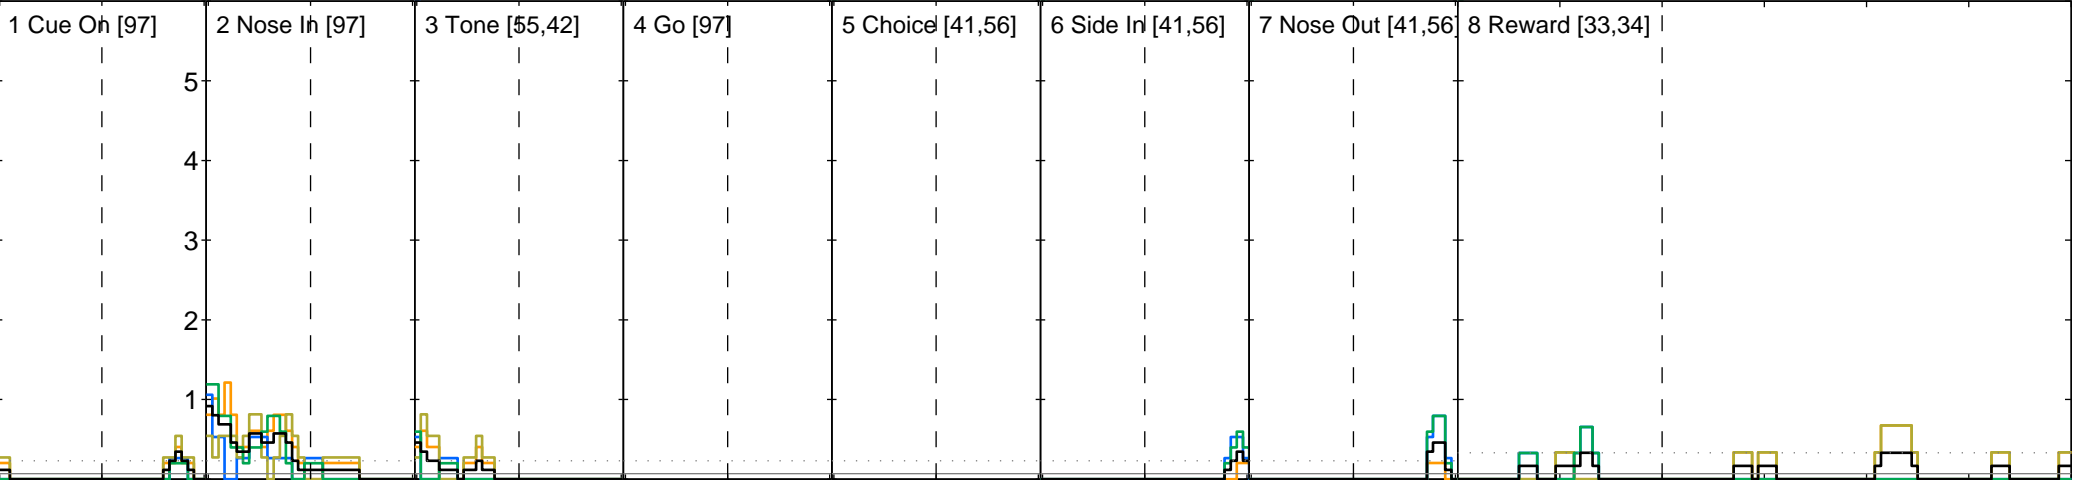

Cell: C0320070618T07g

AP: 0.96 ML: 3.6 DV: 5.6

w: 4 n: 2282  $P_{ISI>2}$ : 0.78

1/2pw: 234 $\mu$ s p->v: 1078 $\mu$ s

$\beta_T$ : NaN  $\beta_D$ : NaN

$\beta_P$ : NaN SI: NaN

Session FR: 0.454 Hz

Pk Ev: None

Pk FR: --

MSN

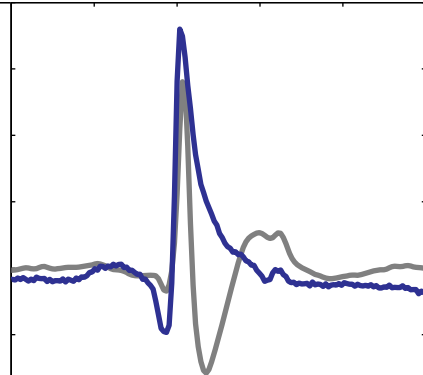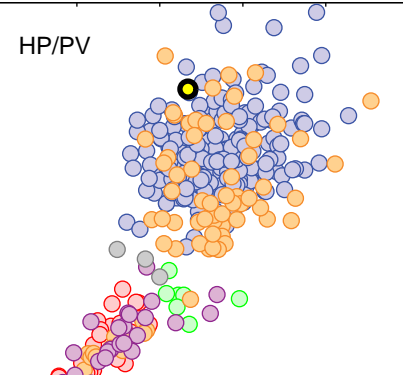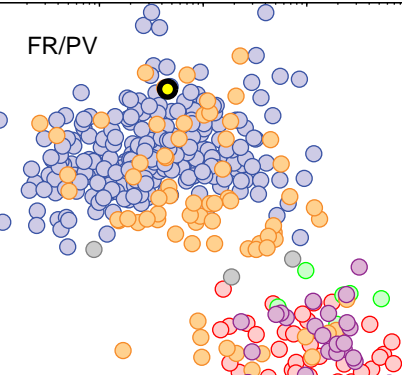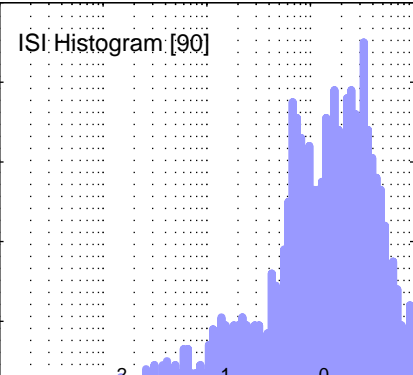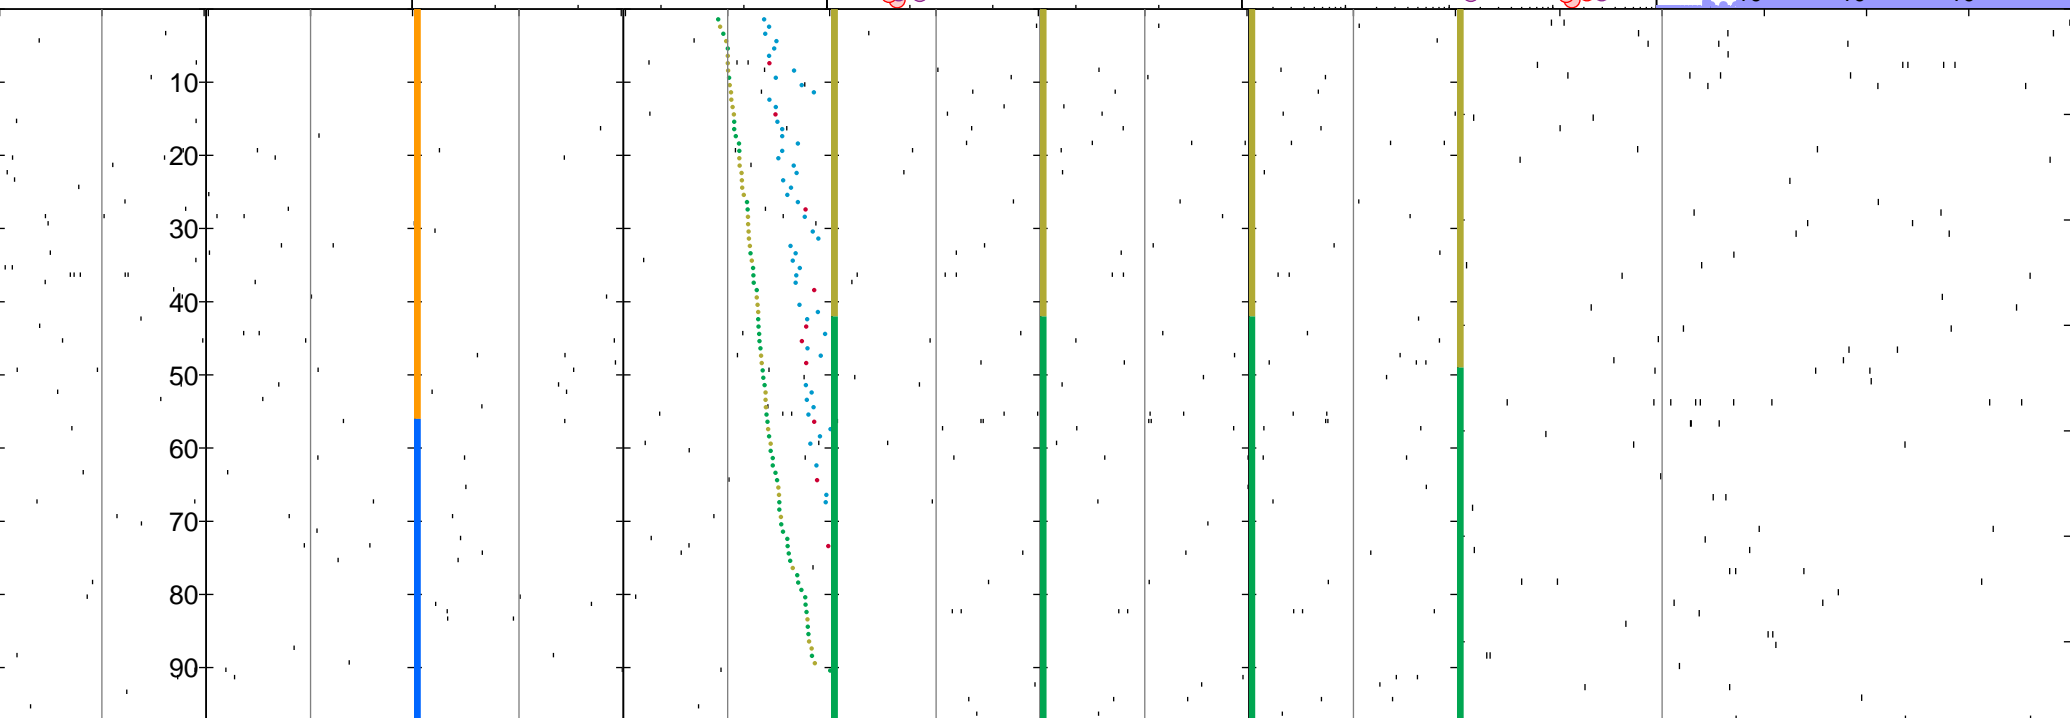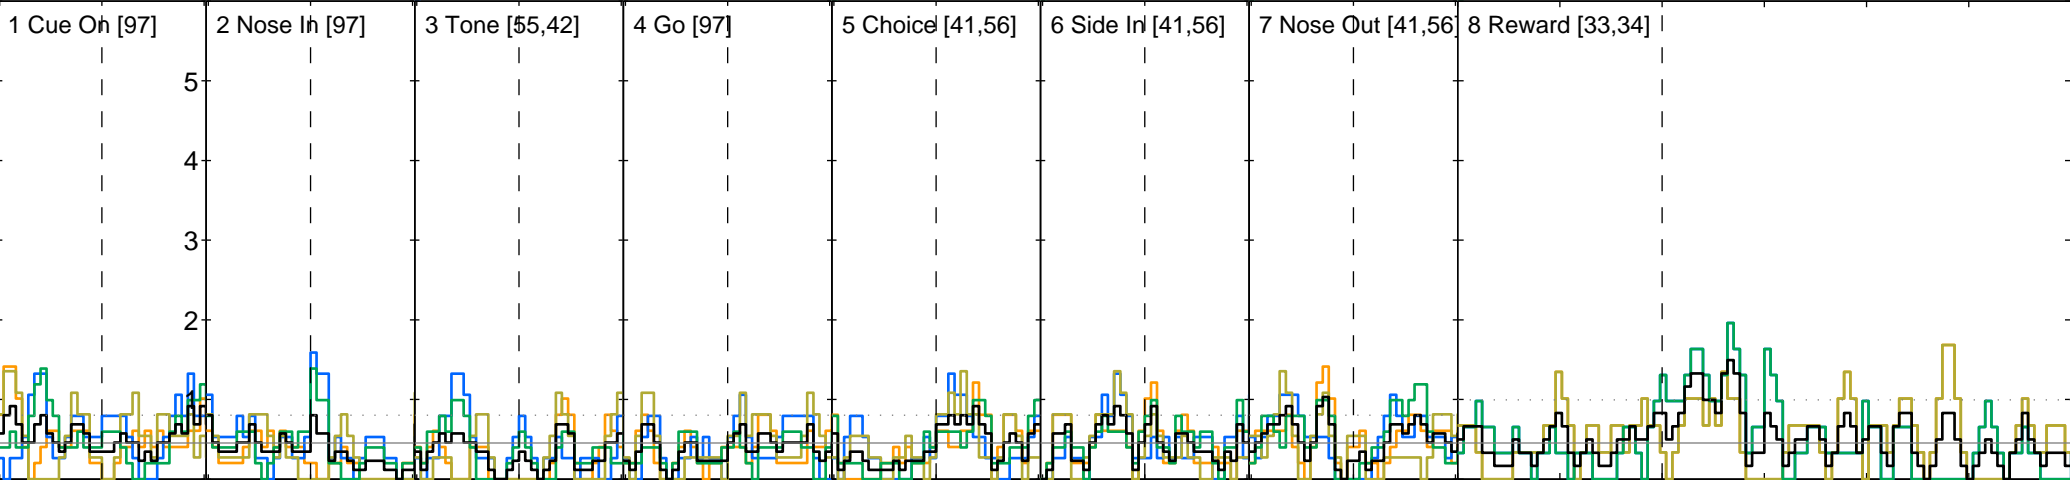

**Cell: C0320070618T07h**

AP: 0.96 ML: 3.6 DV: 5.6  
w: 4 n: 691  $P_{ISI>2}$ : 0.96  
1/2pw: 259 $\mu$ s p->v: 758 $\mu$ s  
 $\beta_T$ : NaN  $\beta_D$ : NaN  
 $\beta_P$ : NaN SI: NaN  
Session FR: 0.138 Hz  
Pk Ev: None  
Pk FR: --

MSN

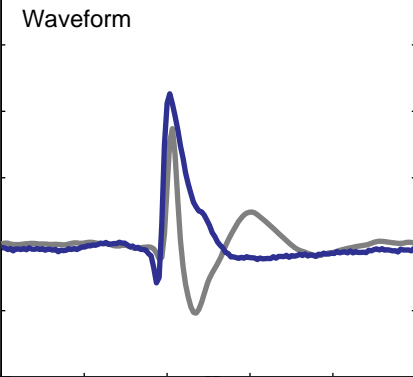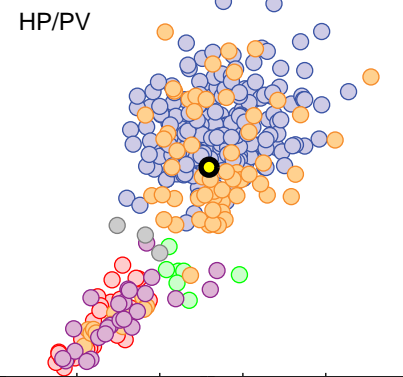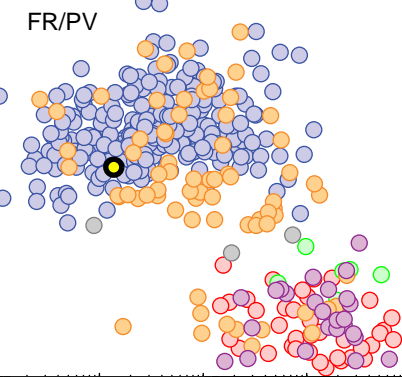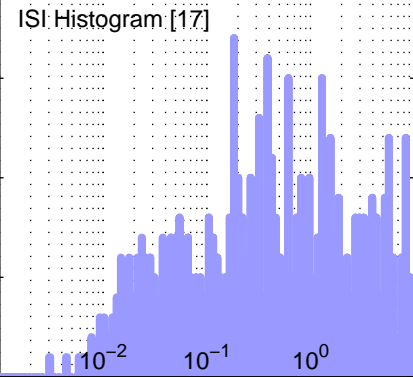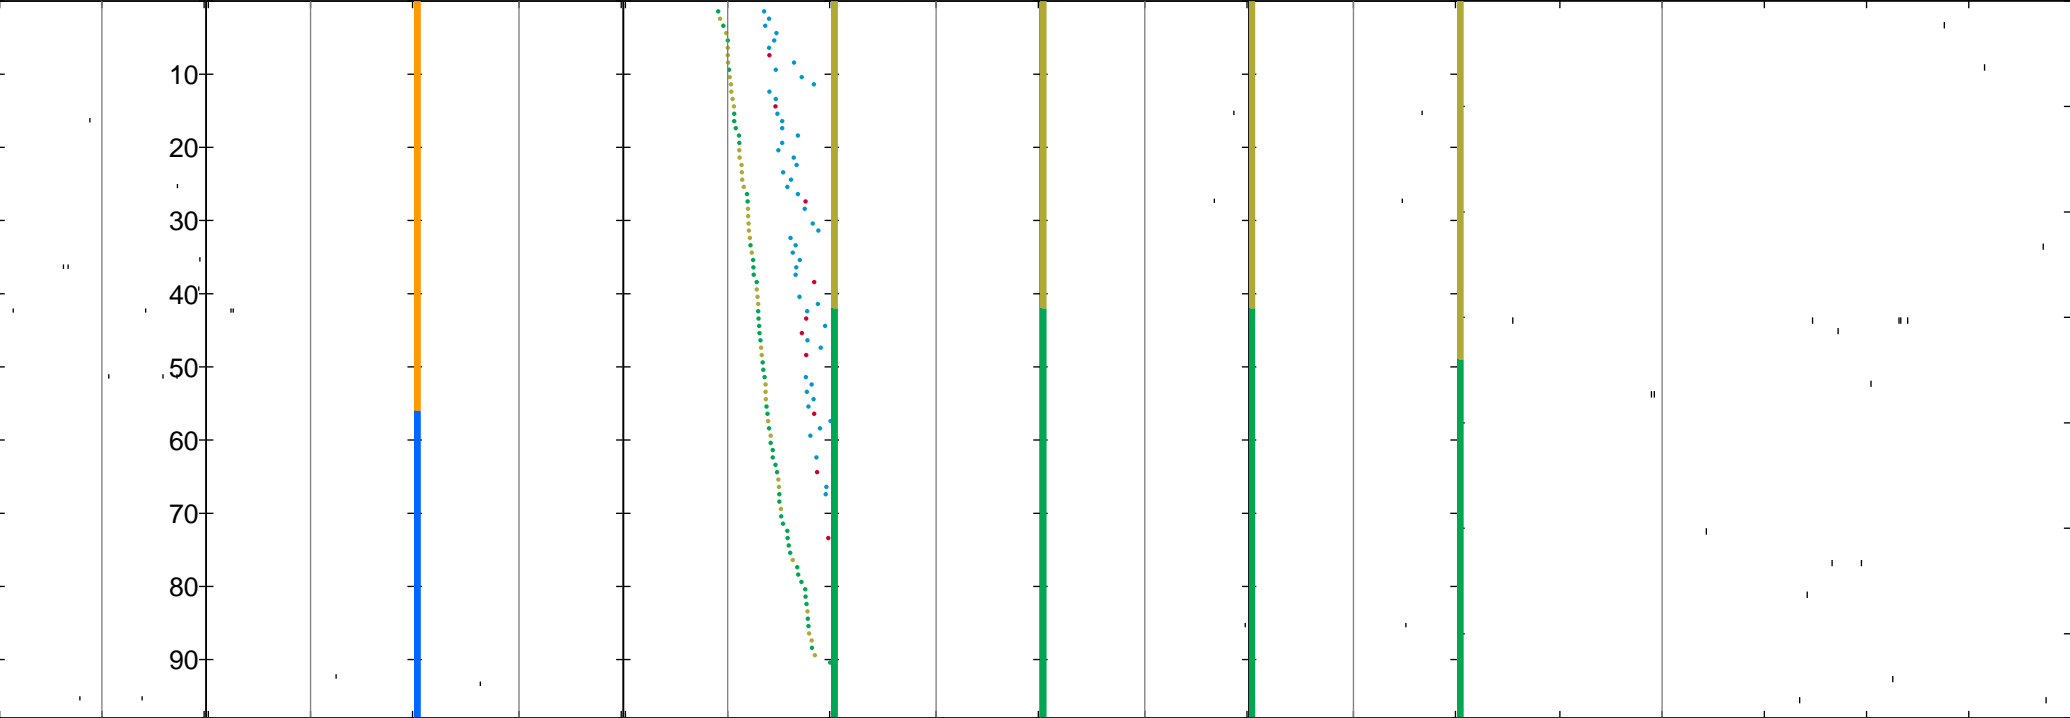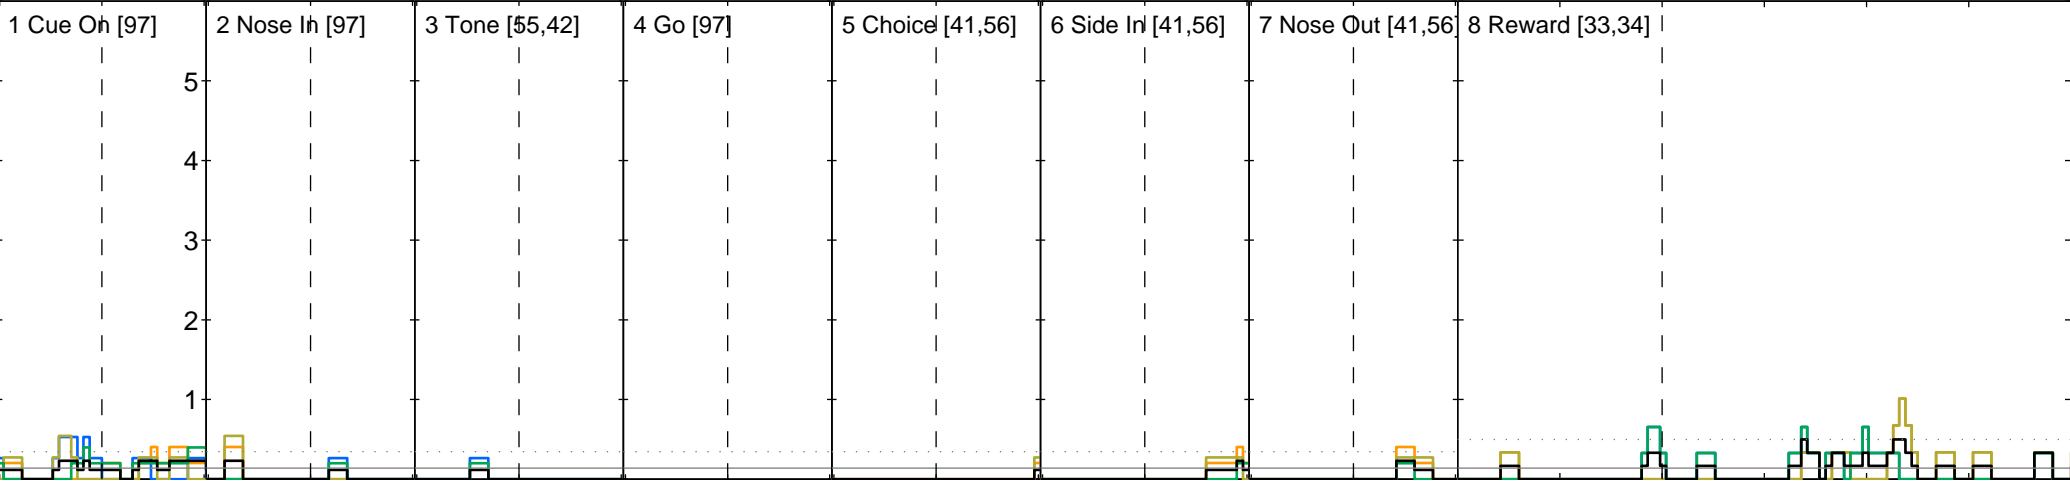

**Cell: C0320070618T07i**

AP: 0.96 ML: 3.6 DV: 5.6  
w: 3 n: 1895  $P_{ISI>2}$ : 0.83  
1/2pw: 248 $\mu$ s p->v: 1027 $\mu$ s  
 $\beta_T$ : NaN  $\beta_D$ : NaN  
 $\beta_P$ : NaN SI: NaN  
Session FR: 0.377 Hz  
Pk Ev: None  
Pk FR: --

MSN

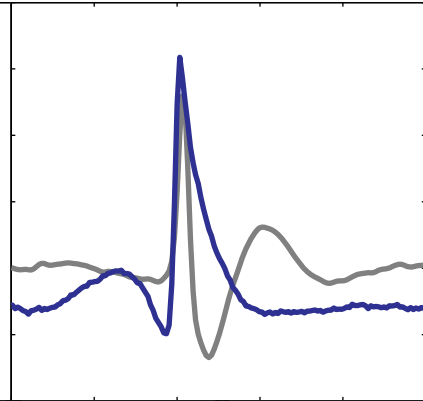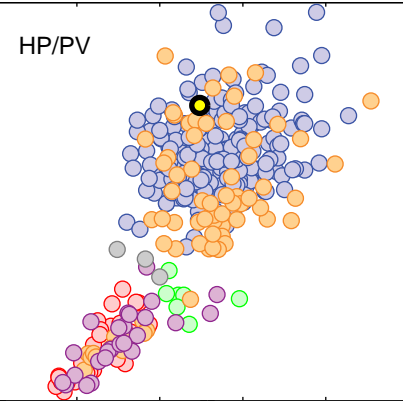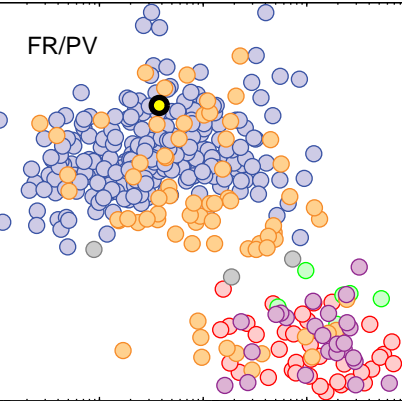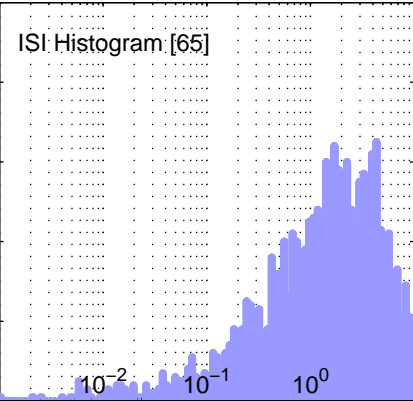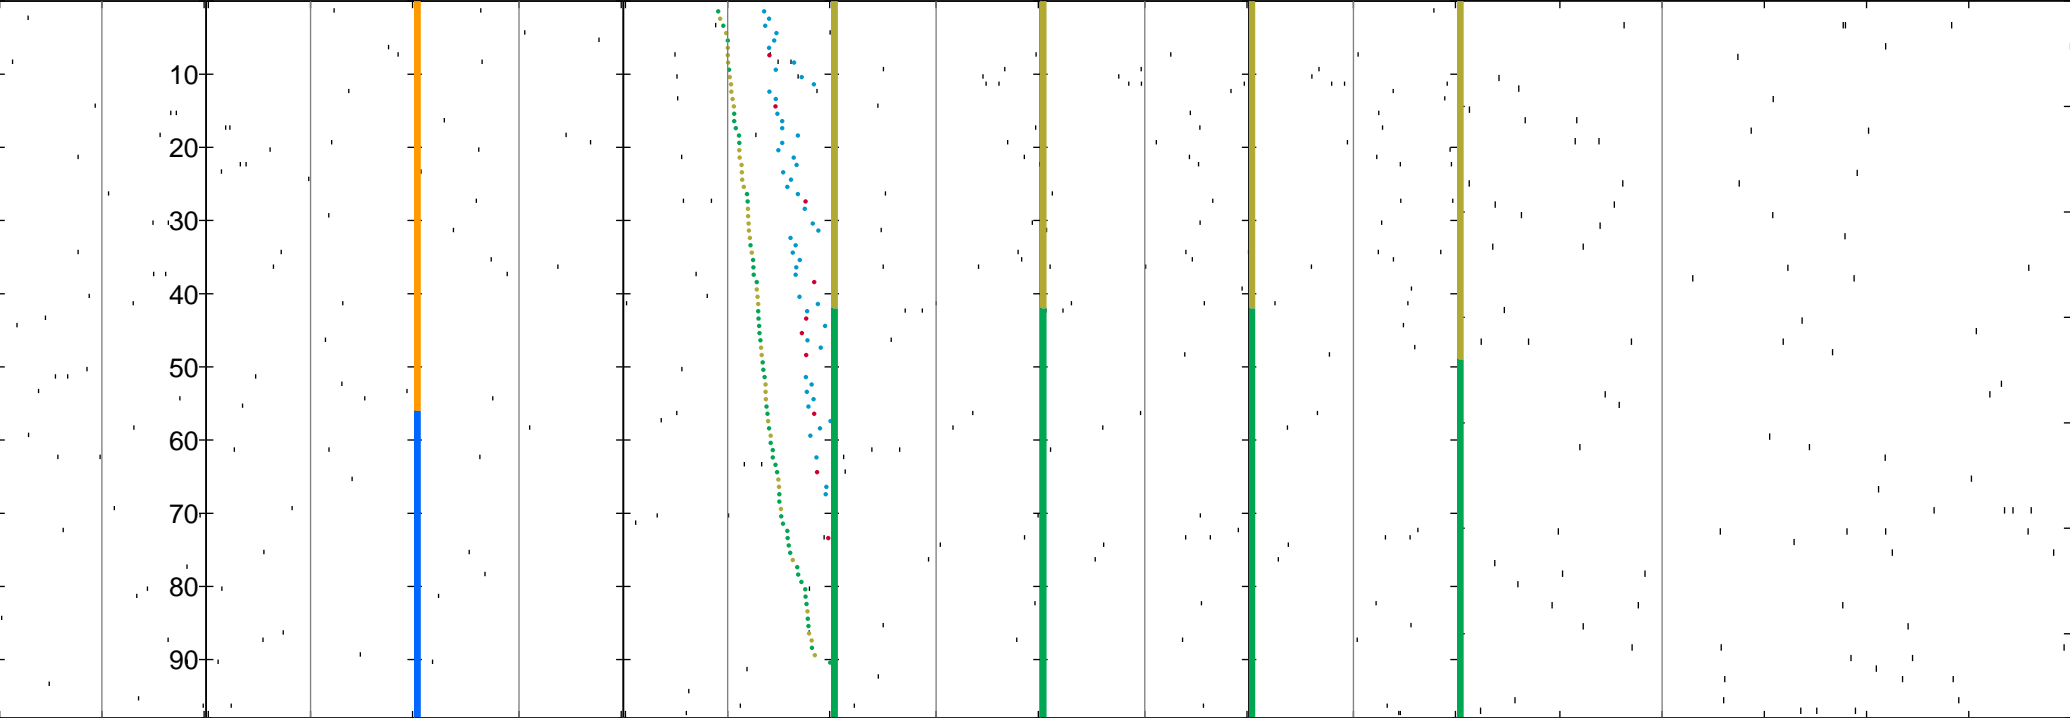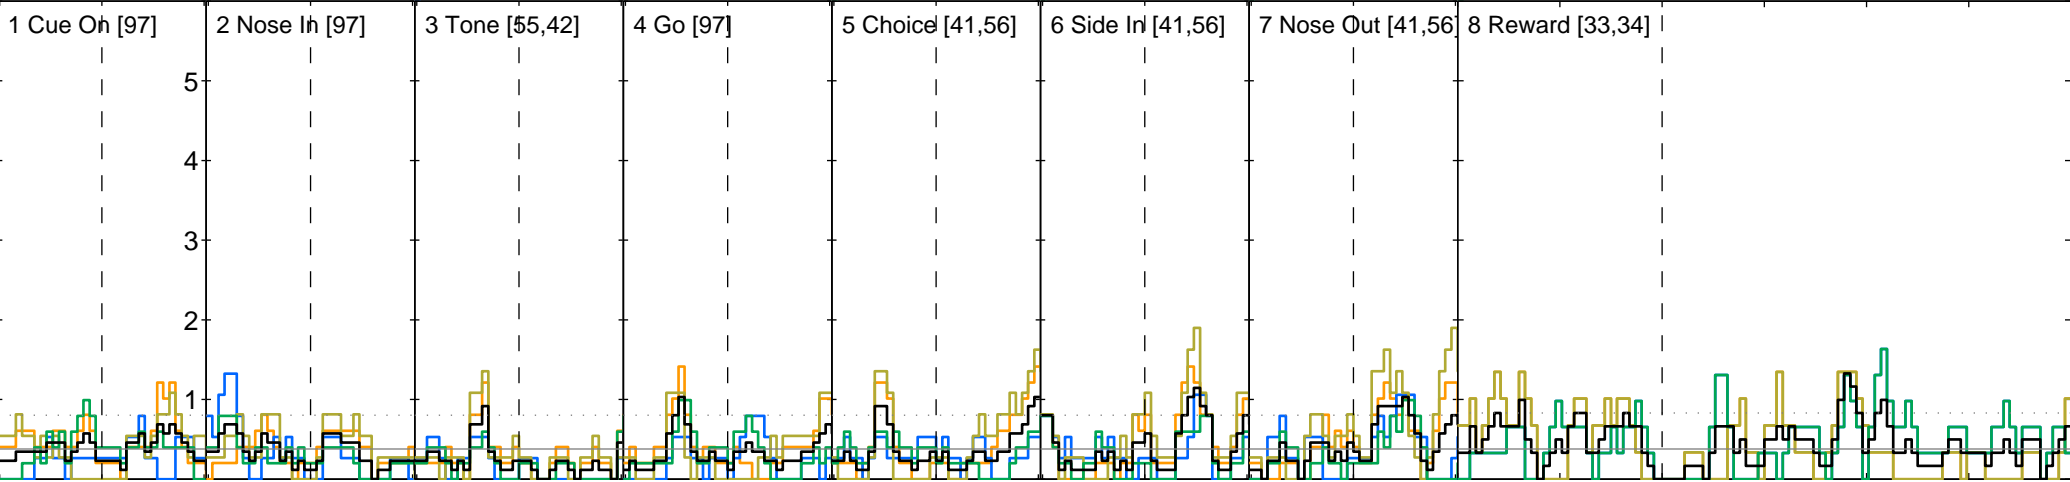



**Cell: C0320070618T07j**

AP: 0.96 ML: 3.6 DV: 5.6  
w: 3 n: 244  $P_{ISI>2}$ : 0.99  
1/2pw: 219 $\mu$ s p->v: 790 $\mu$ s  
 $\beta_T$ : NaN  $\beta_D$ : NaN  
 $\beta_P$ : NaN SI: NaN  
Session FR: 0.0488 Hz  
Pk Ev: None  
Pk FR: --

MSN

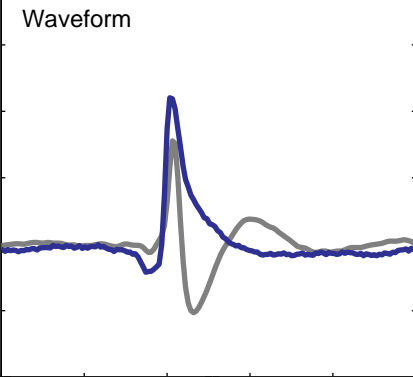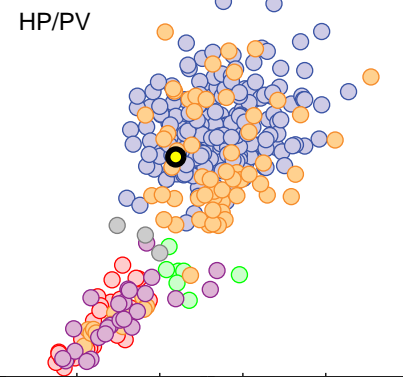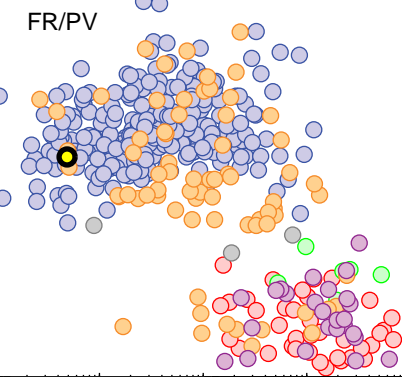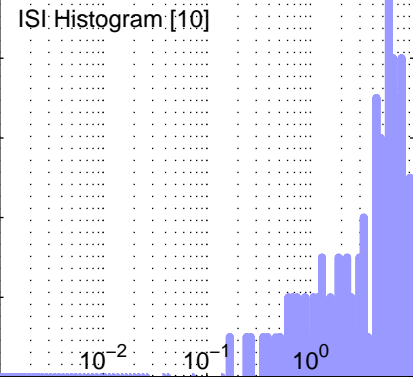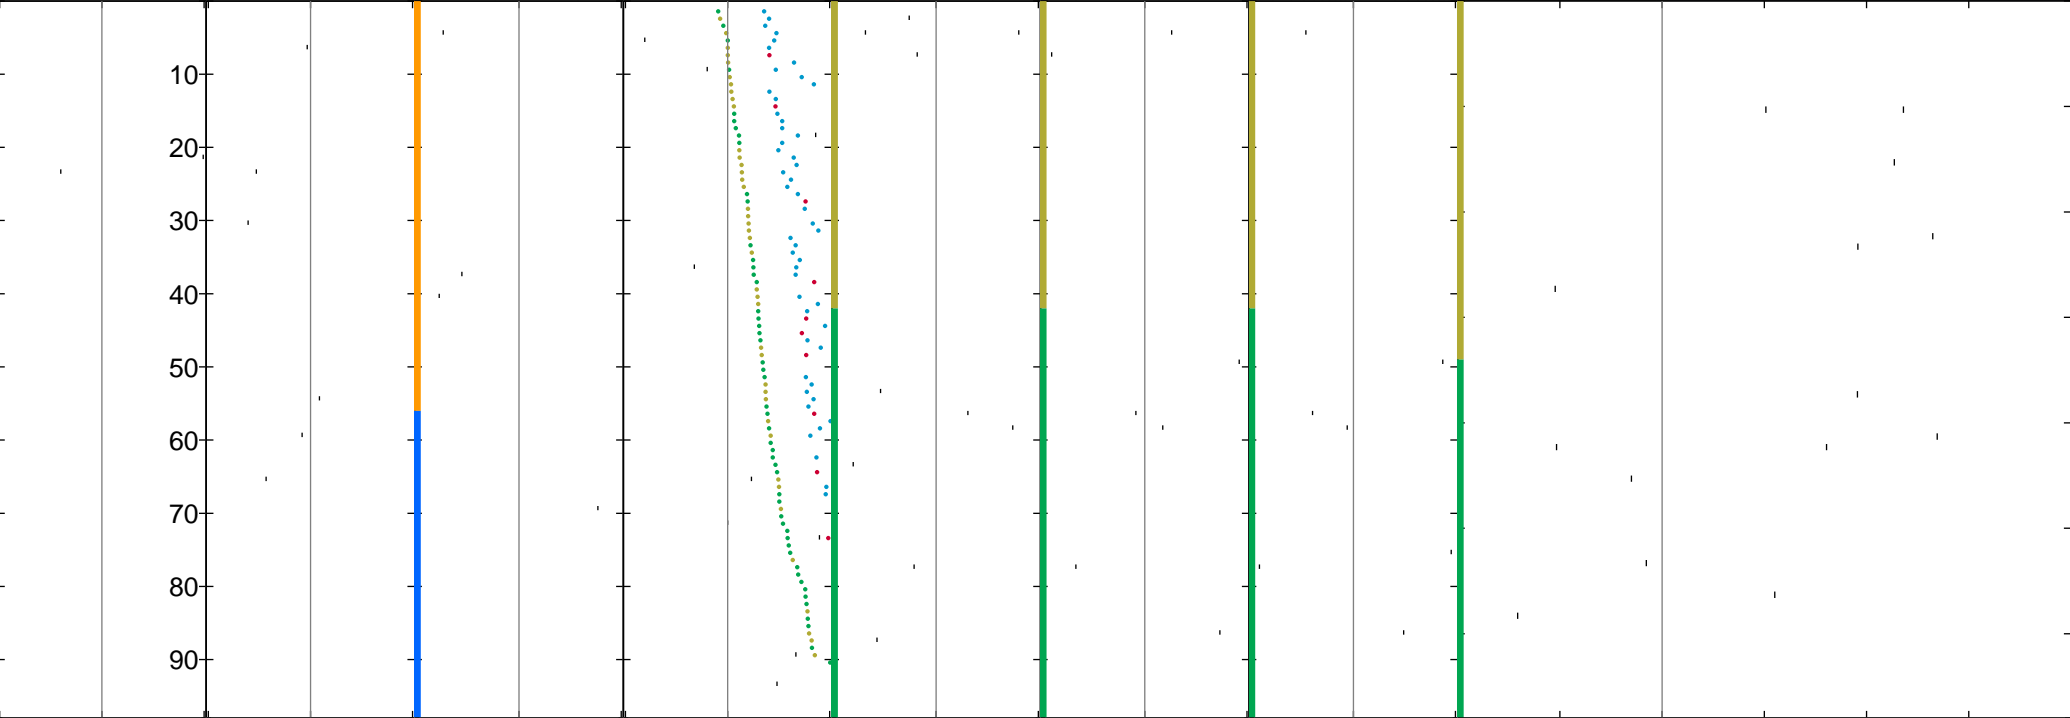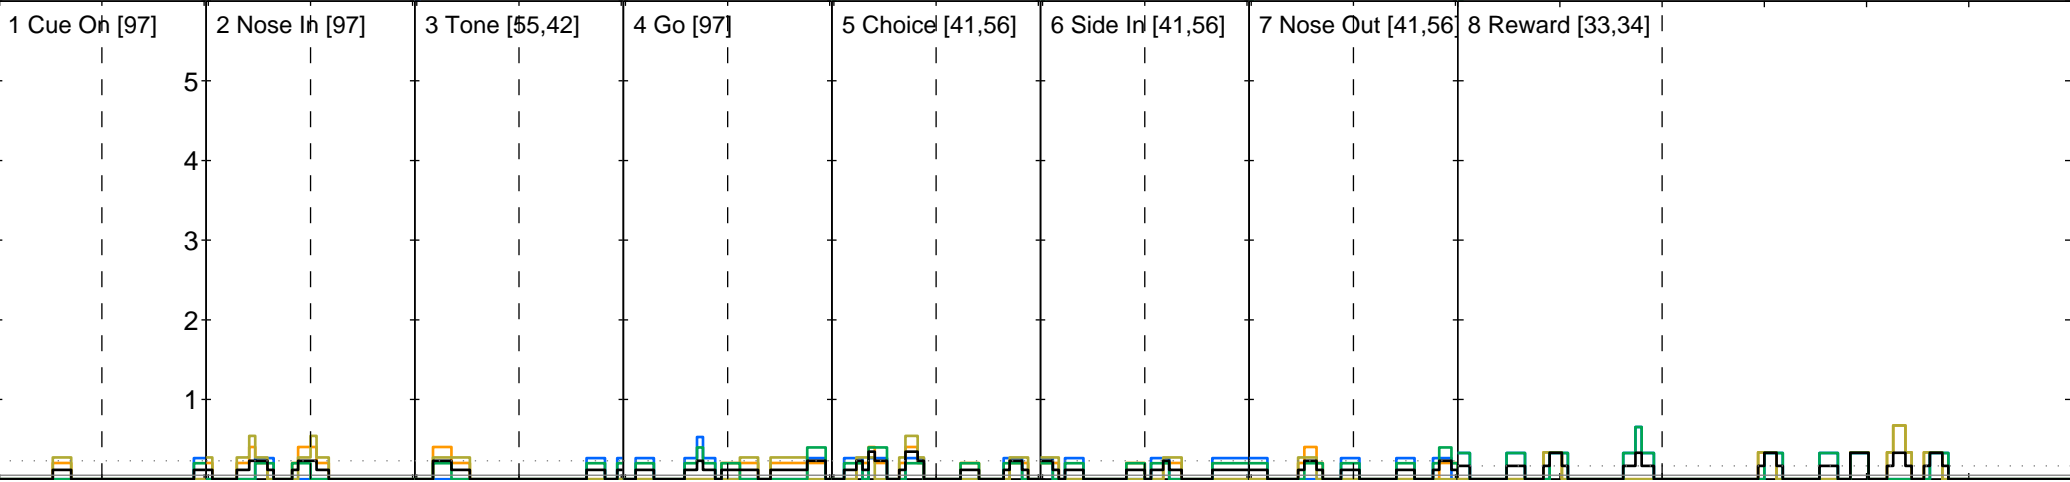

**Cell: C0320070618T071**

AP: 0.96 ML: 3.6 DV: 5.6  
w: 4 n: 173  $P_{ISI>2}$ : 0.99  
1/2pw: 227 $\mu$ s p->v: 856 $\mu$ s  
 $\beta_T$ : NaN  $\beta_D$ : NaN  
 $\beta_P$ : NaN SI: NaN  
Session FR: 0.0351 Hz  
Pk Ev: None  
Pk FR: --

MSN

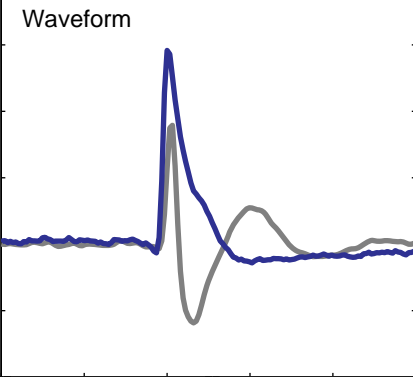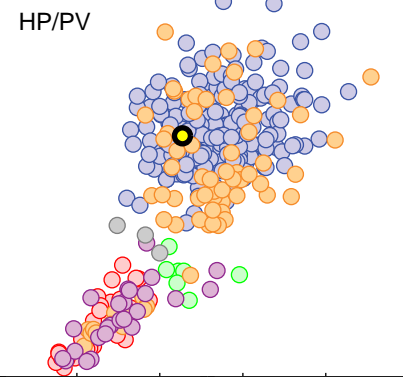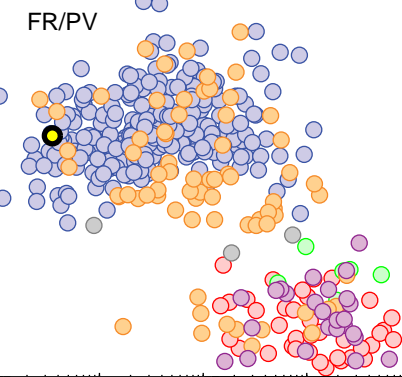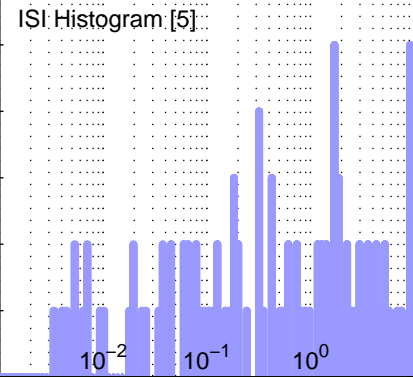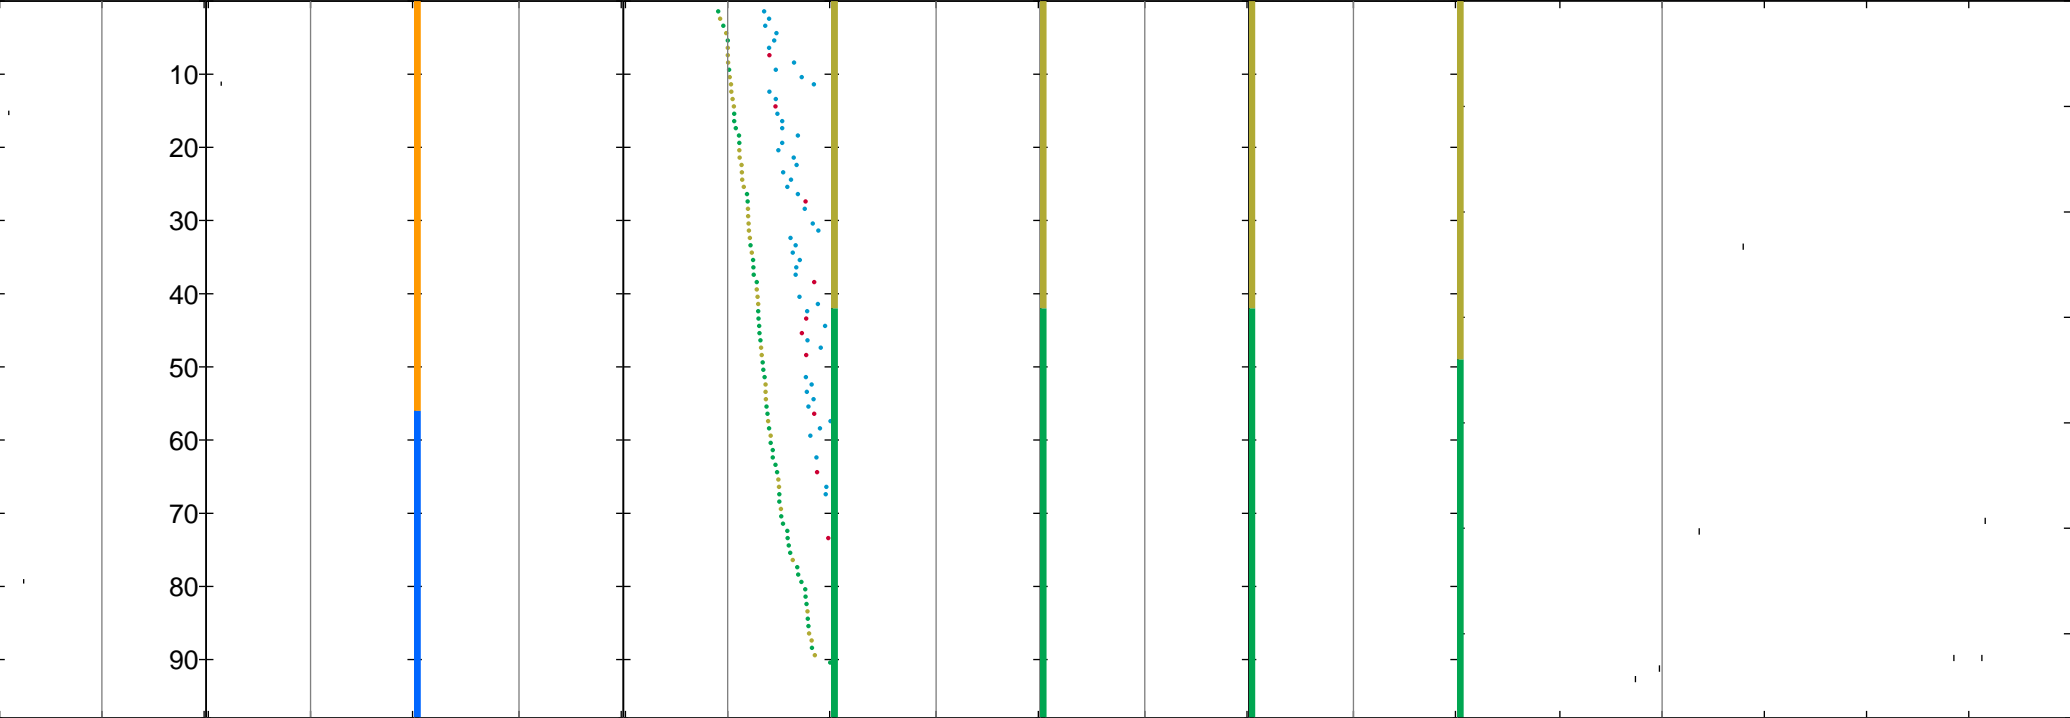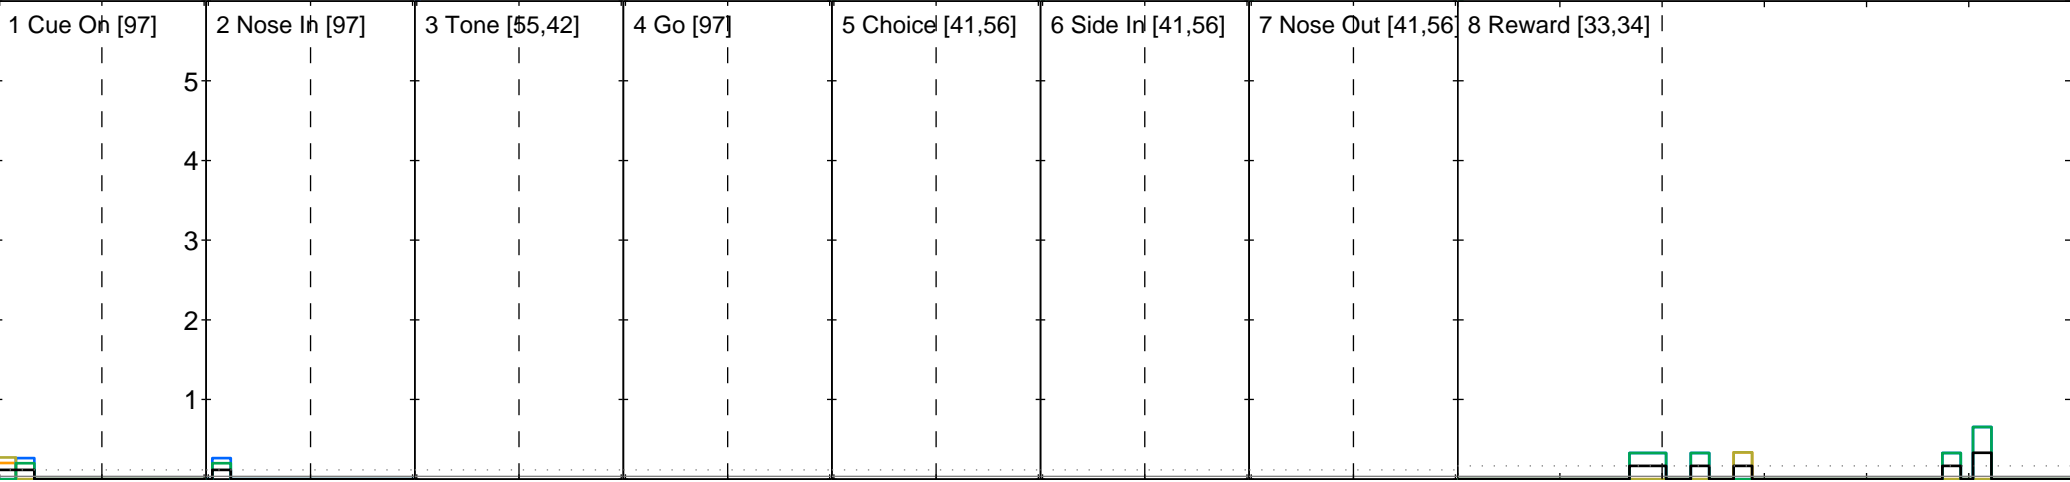

**Cell: C0320070618T09a**

AP: 1.6 ML: 3.7 DV: 4.9

w: 1 n: 269  $P_{ISI>2}$ : 0.991/2pw: 253 $\mu$ s p->v: 918 $\mu$ s $\beta_T$ : NaN  $\beta_D$ : NaN $\beta_P$ : NaN SI: NaN

Session FR: 0.0552 Hz

Pk Ev: None

Pk FR: --

MSN

## Waveform

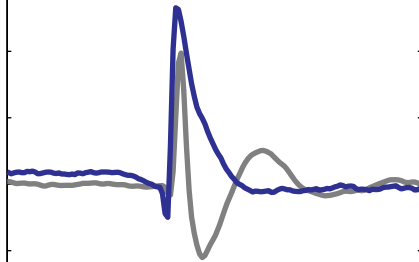

## HP/PV

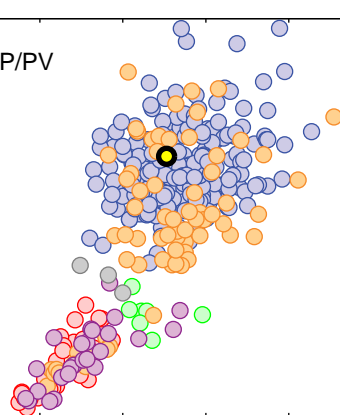

## FR/PV

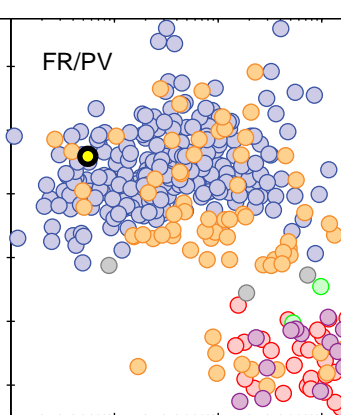

## ISI Histogram [13]

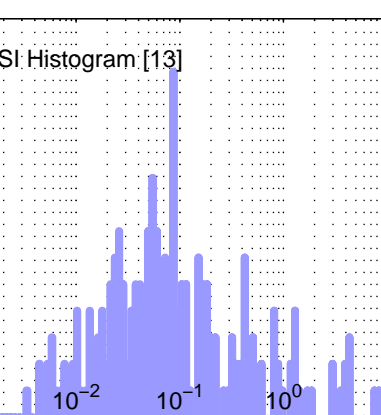10  
20  
30  
40  
50  
60  
70  
80  
90

1 Cue On [97]

2 Nose In [97]

3 Tone [55,42]

4 Go [97]

5 Choice [41,56]

6 Side In [41,56]

7 Nose Out [41,56]

8 Reward [33,34]

5  
4  
3  
2  
1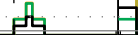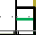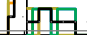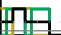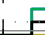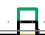

**Cell: C0320070618T09b**

AP: 1.6 ML: 3.7 DV: 4.9  
w: 2 n: 430  $P_{ISI>2}$ : 0.99  
1/2pw: 245 $\mu$ s p->v: 741 $\mu$ s  
 $\beta_T$ : NaN  $\beta_D$ : NaN  
 $\beta_P$ : NaN SI: NaN  
Session FR: 0.0866 Hz  
Pk Ev: None  
Pk FR: --

MSN

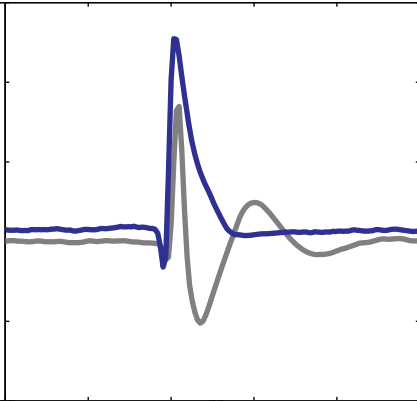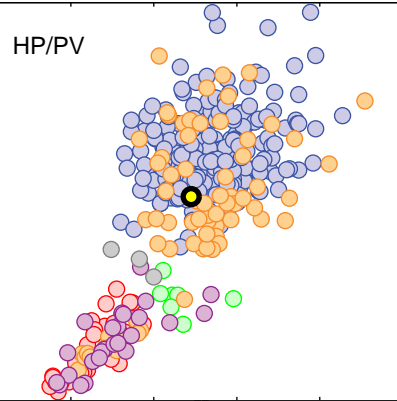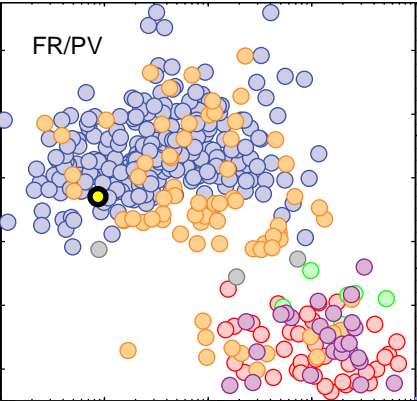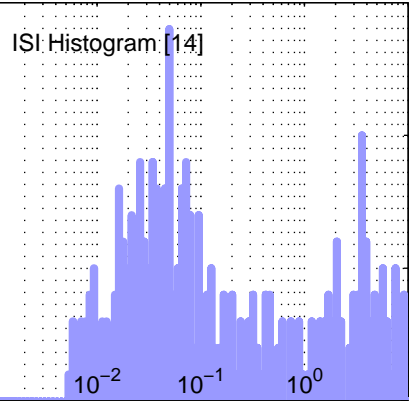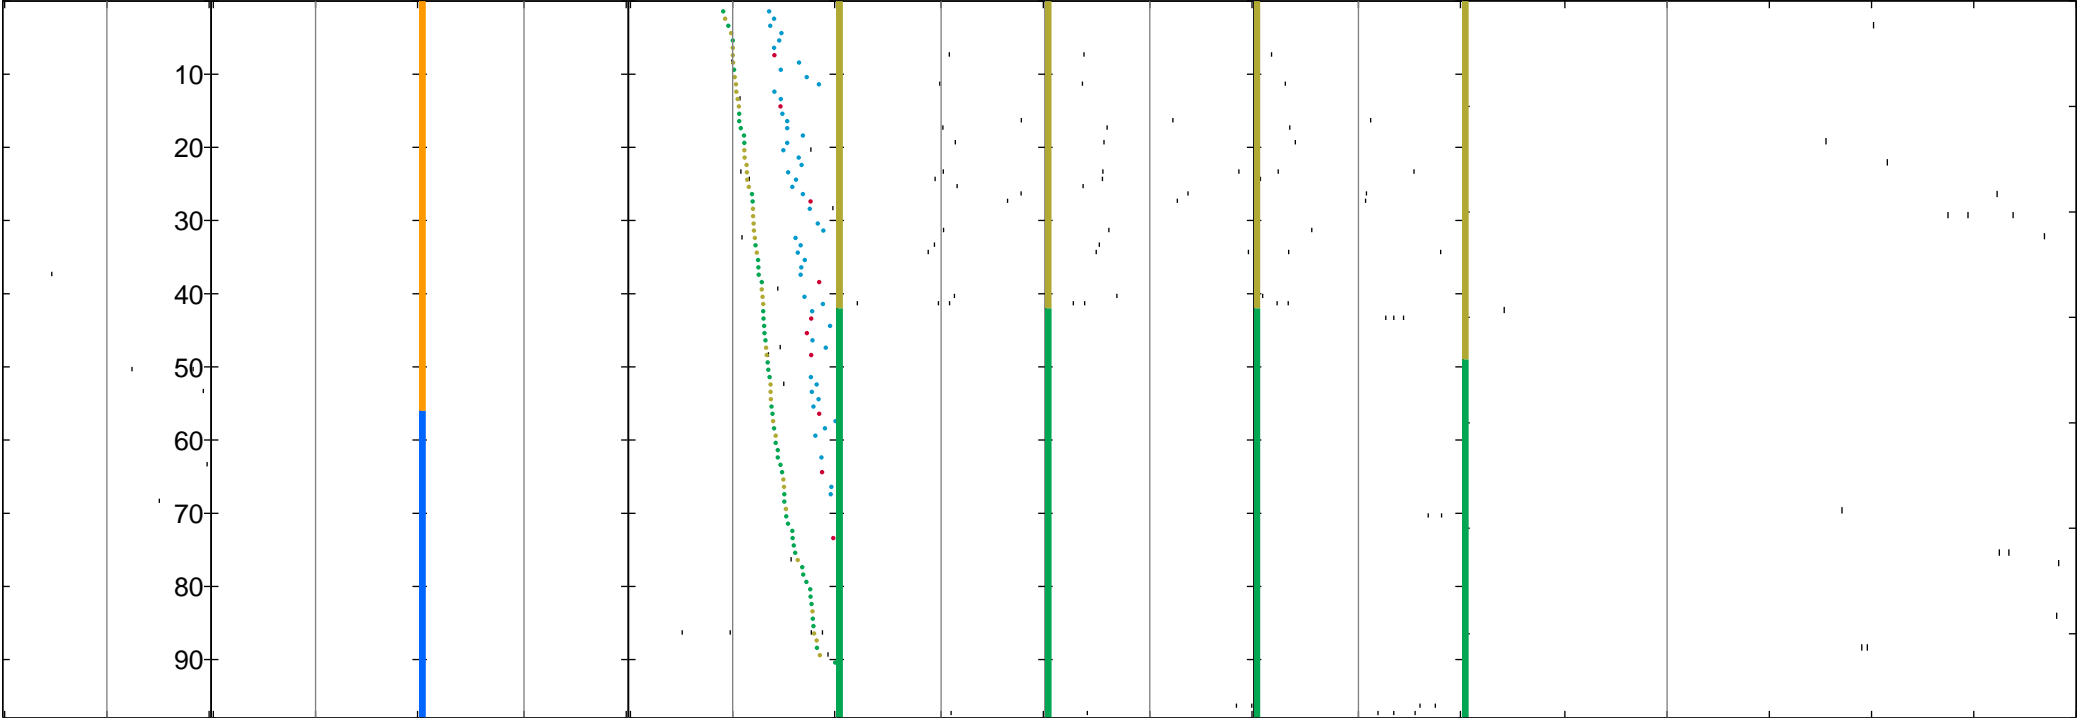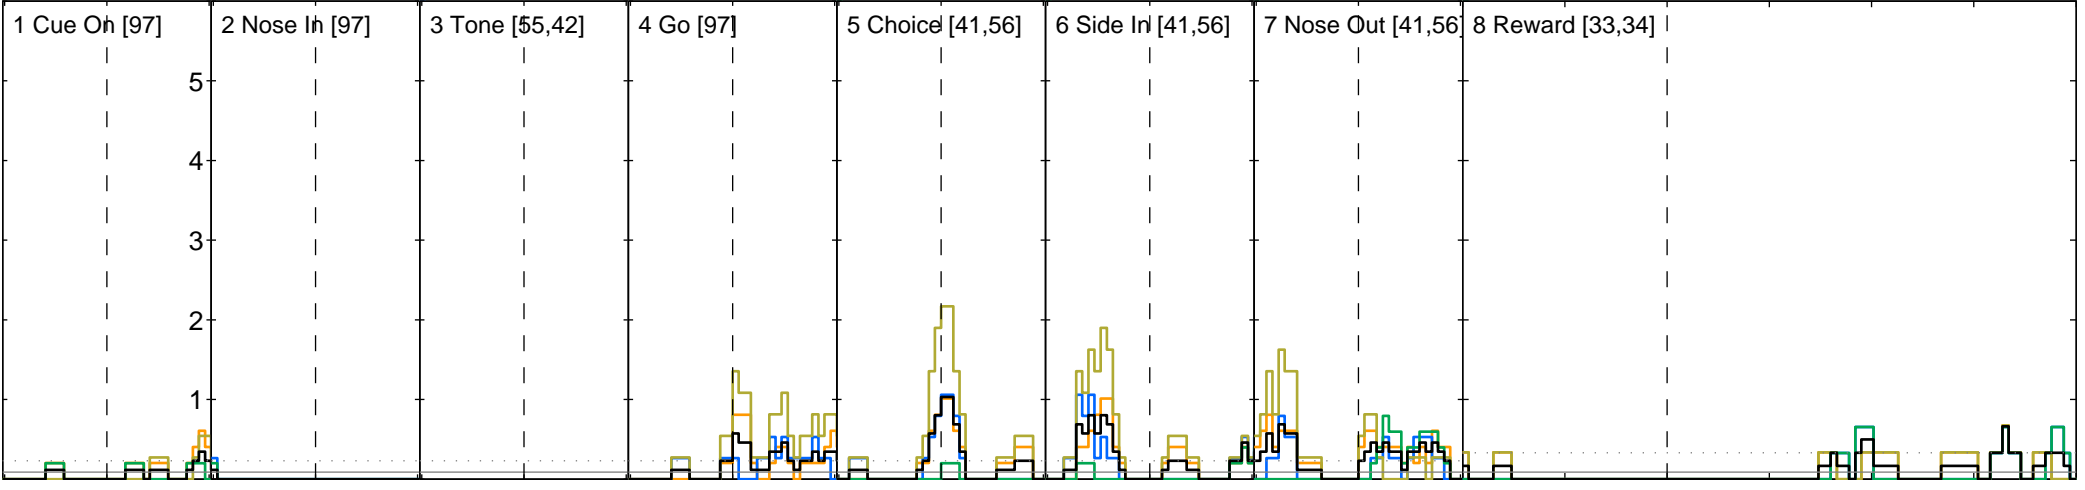

**Cell: C0320070618T09g**

AP: 1.6 ML: 3.7 DV: 4.9

w: 1 n: 284  $P_{ISI>2}$ : 0.991/2pw: 342 $\mu$ s p->v: 899 $\mu$ s $\beta_T$ : NaN  $\beta_D$ : NaN $\beta_P$ : NaN SI: NaN

Session FR: 0.0567 Hz

Pk Ev: None

Pk FR: --

MSN

Waveform

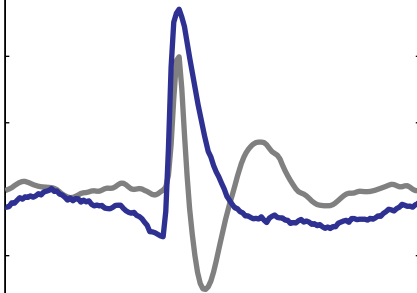

HP/PV

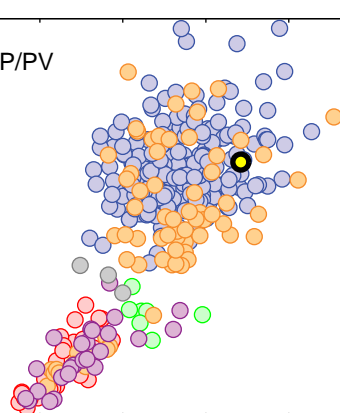

FR/PV

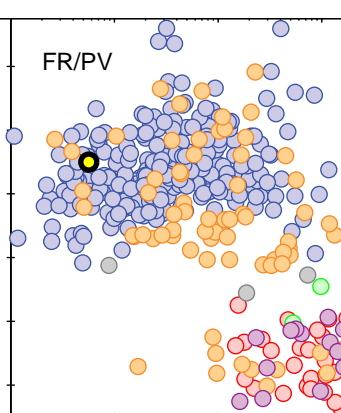

ISI Histogram [6]

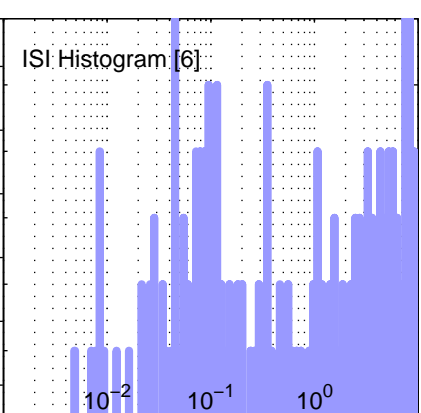

10

20

30

40

50

60

70

80

90

1 Cue On [97]

2 Nose In [97]

3 Tone [55,42]

4 Go [97]

5 Choice [41,56]

6 Side In [41,56]

7 Nose Out [41,56]

8 Reward [33,34]

5

4

3

2

1

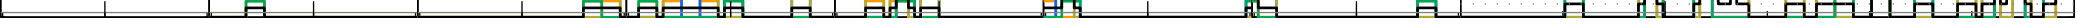

**Cell: C0320070618T11a**

AP: -0.96 ML: 3.7 DV: 5.3  
w: 2 n: 191  $P_{ISI>2}$ : 1  
1/2pw: 261 $\mu$ s p->v: 771 $\mu$ s  
 $\beta_T$ : NaN  $\beta_D$ : NaN  
 $\beta_P$ : NaN SI: NaN  
Session FR: 0.0384 Hz  
Pk Ev: None  
Pk FR: --

MSN

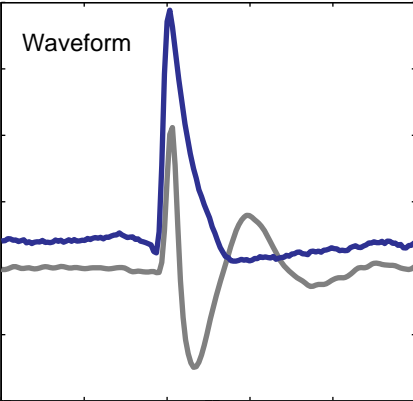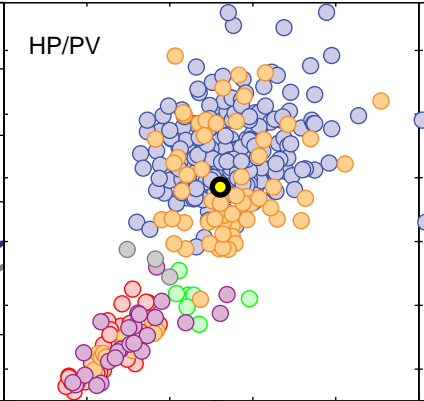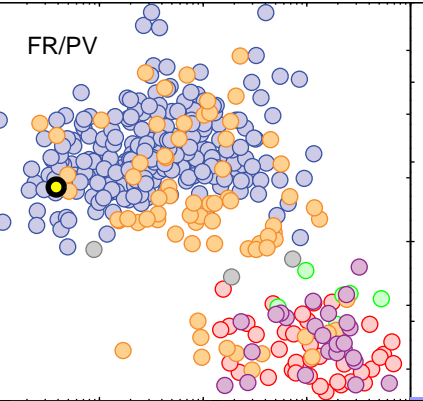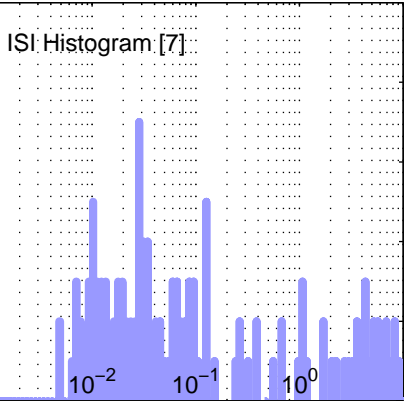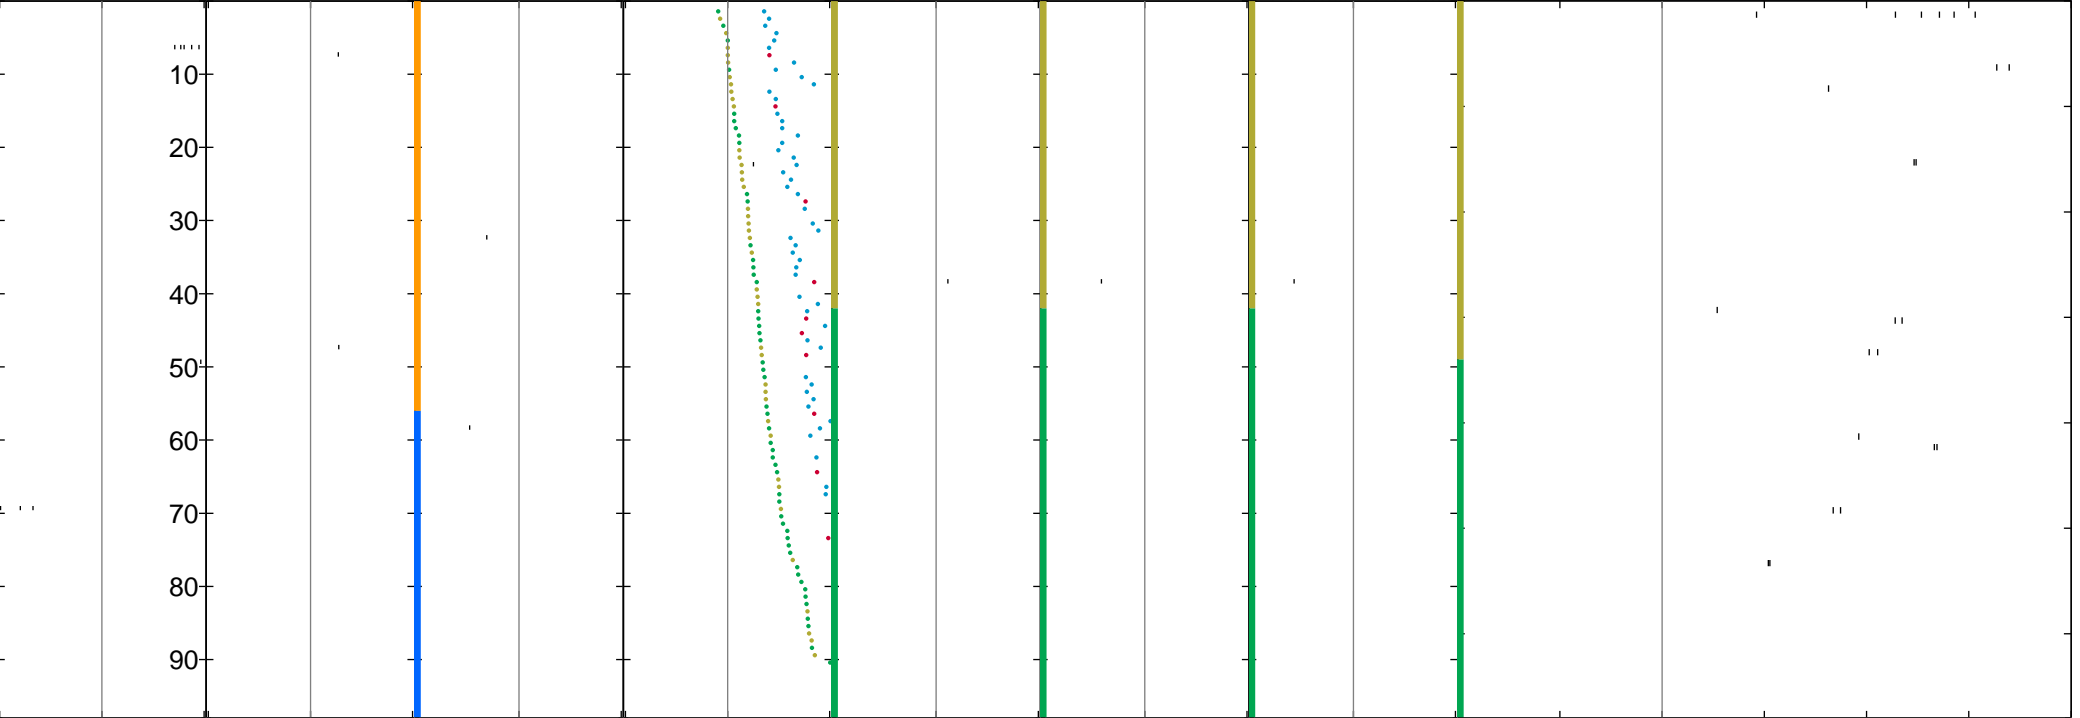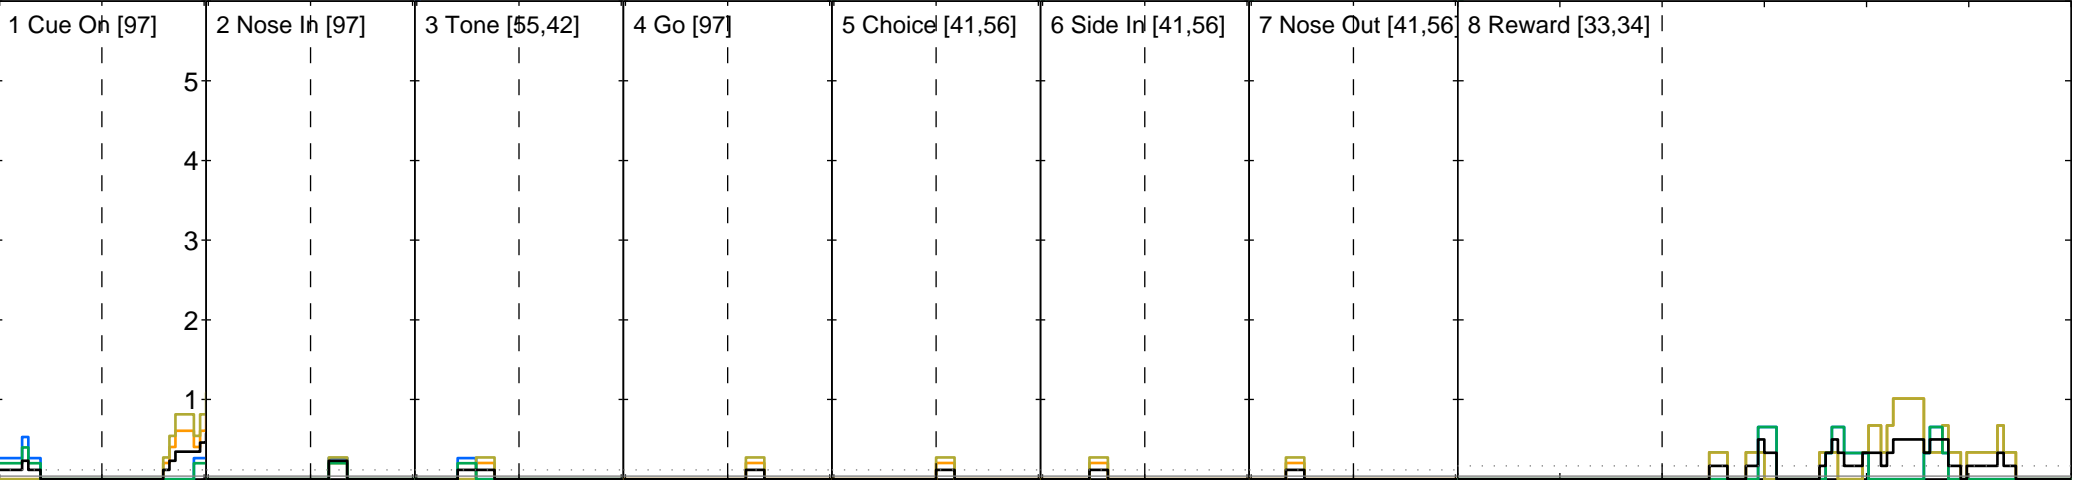

**Cell: C0320070619T06a**

AP: 1.7 ML: 1.3 DV: 6.5

w: 4 n: 2161  $P_{ISI>2}$ : 0.77

1/2pw: 342 $\mu$ s p->v: 862 $\mu$ s

$\beta_T$ : NaN  $\beta_D$ : NaN

$\beta_P$ : NaN SI: NaN

Session FR: 0.51 Hz

Pk Ev: None

Pk FR: --

MSN

Waveform

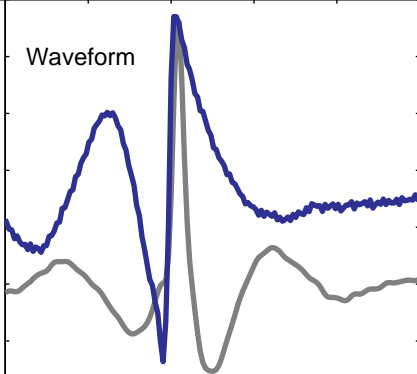

HP/PV

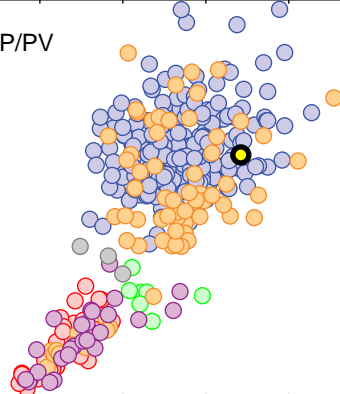

FR/PV

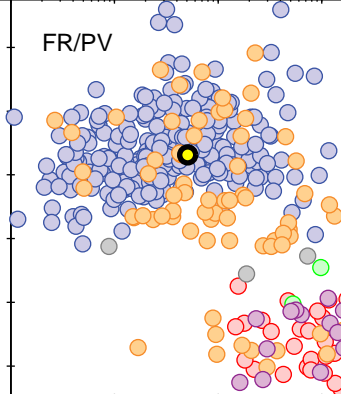

ISI Histogram [60]

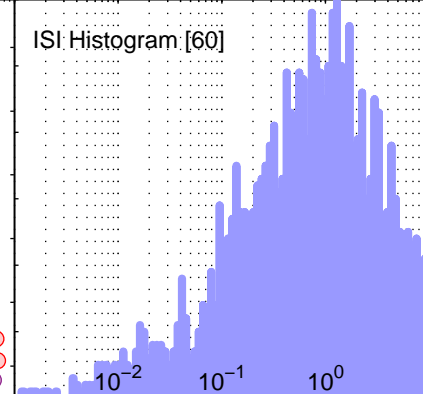

10  
20  
30  
40  
50  
60  
70  
80  
90

1 Cue On [94]

2 Nose In [94]

3 Tone [50,44]

4 Go [94]

5 Choice [47,47]

6 Side In [47,47]

7 Nose Out [47,47]

8 Reward [34,32]

5  
4  
3  
2  
1

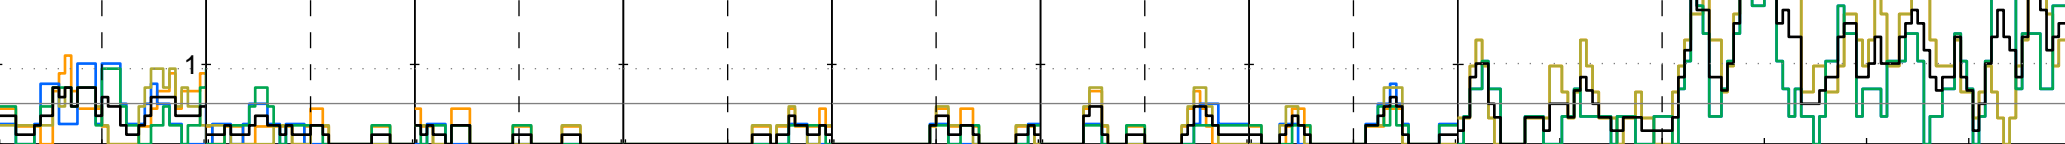



**Cell: C0320070619T07b**

AP: 0.96 ML: 3.6 DV: 5.8  
w: 4 n: 708  $P_{ISI>2}$ : 0.97  
1/2pw: 248 $\mu$ s p->v: 779 $\mu$ s  
 $\beta_T$ : NaN  $\beta_D$ : NaN  
 $\beta_P$ : NaN SI: NaN  
Session FR: 0.167 Hz  
Pk Ev: None  
Pk FR: --

MSN

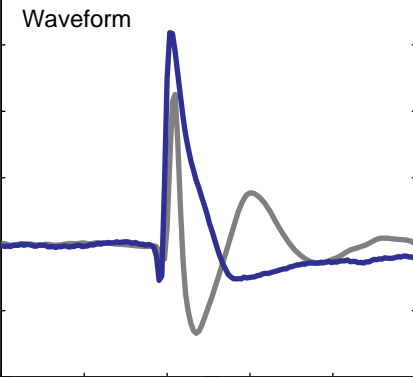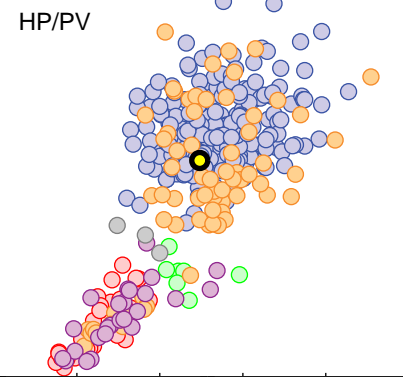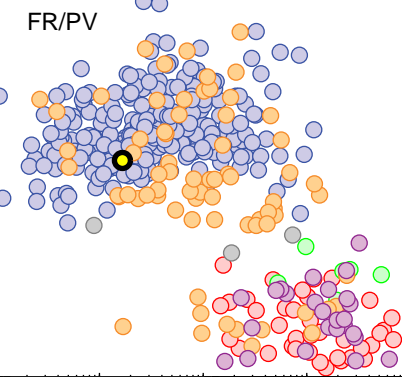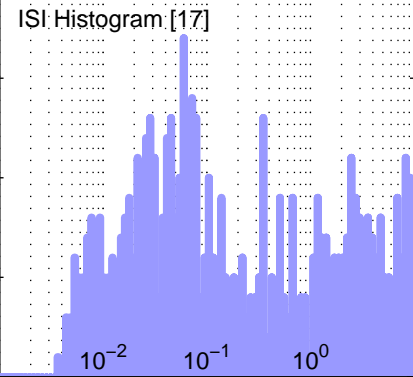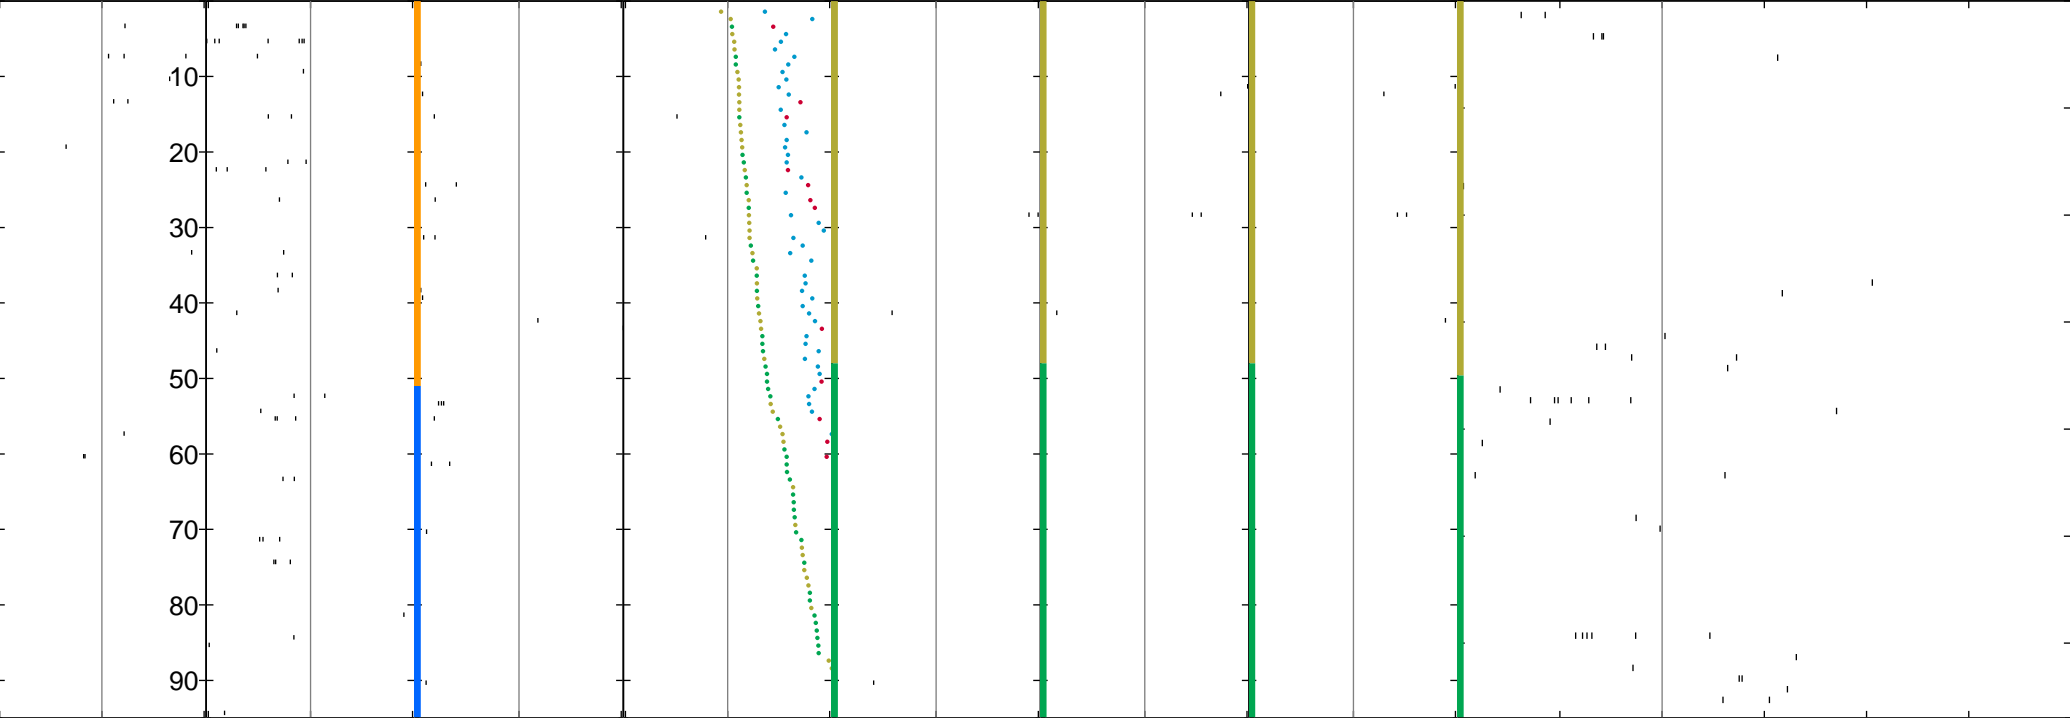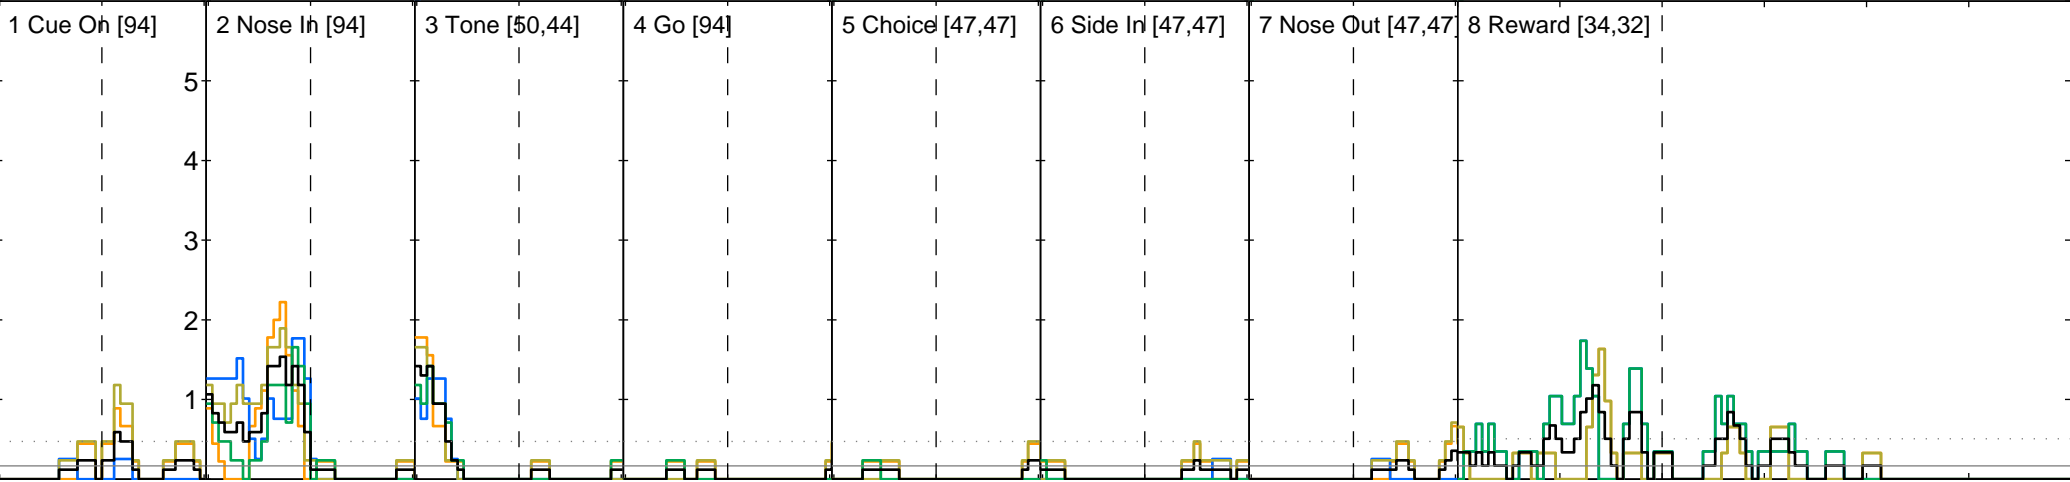

**Cell: C0320070619T07c**

AP: 0.96 ML: 3.6 DV: 5.8  
w: 2 n: 362  $P_{ISI>2}$ : 0.98  
1/2pw: 266 $\mu$ s p->v: 826 $\mu$ s  
 $\beta_T$ : NaN  $\beta_D$ : NaN  
 $\beta_P$ : NaN SI: NaN  
Session FR: 0.0858 Hz  
Pk Ev: None  
Pk FR: --

MSN

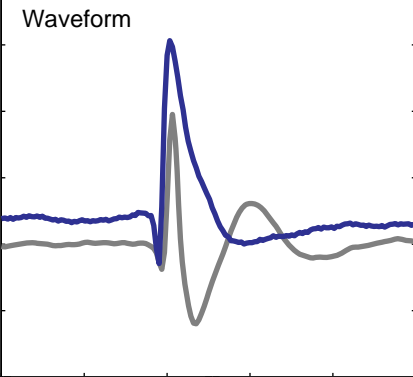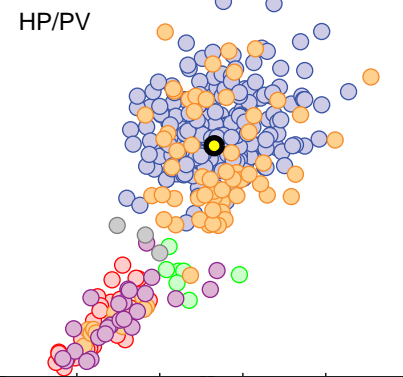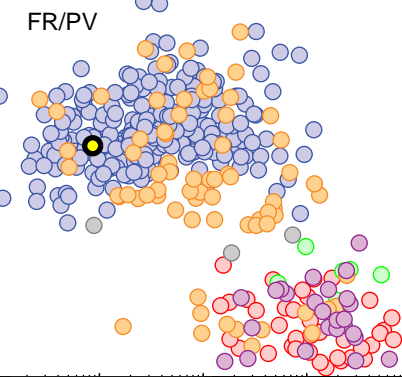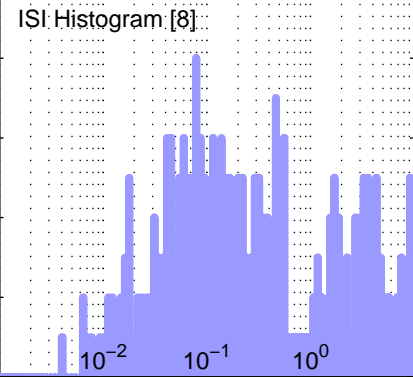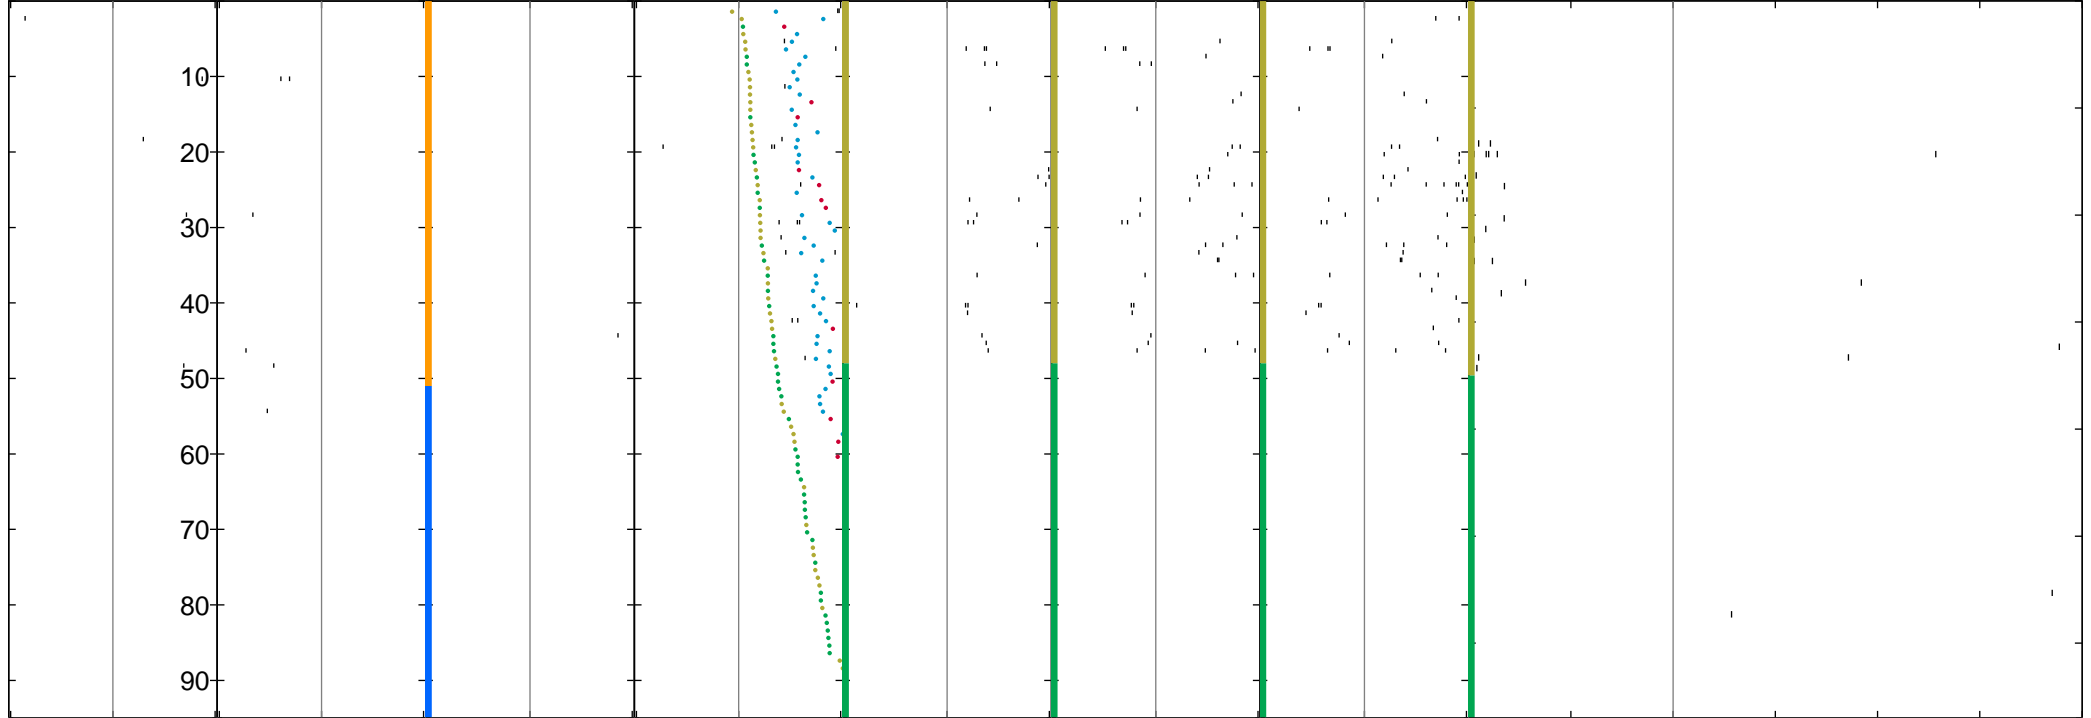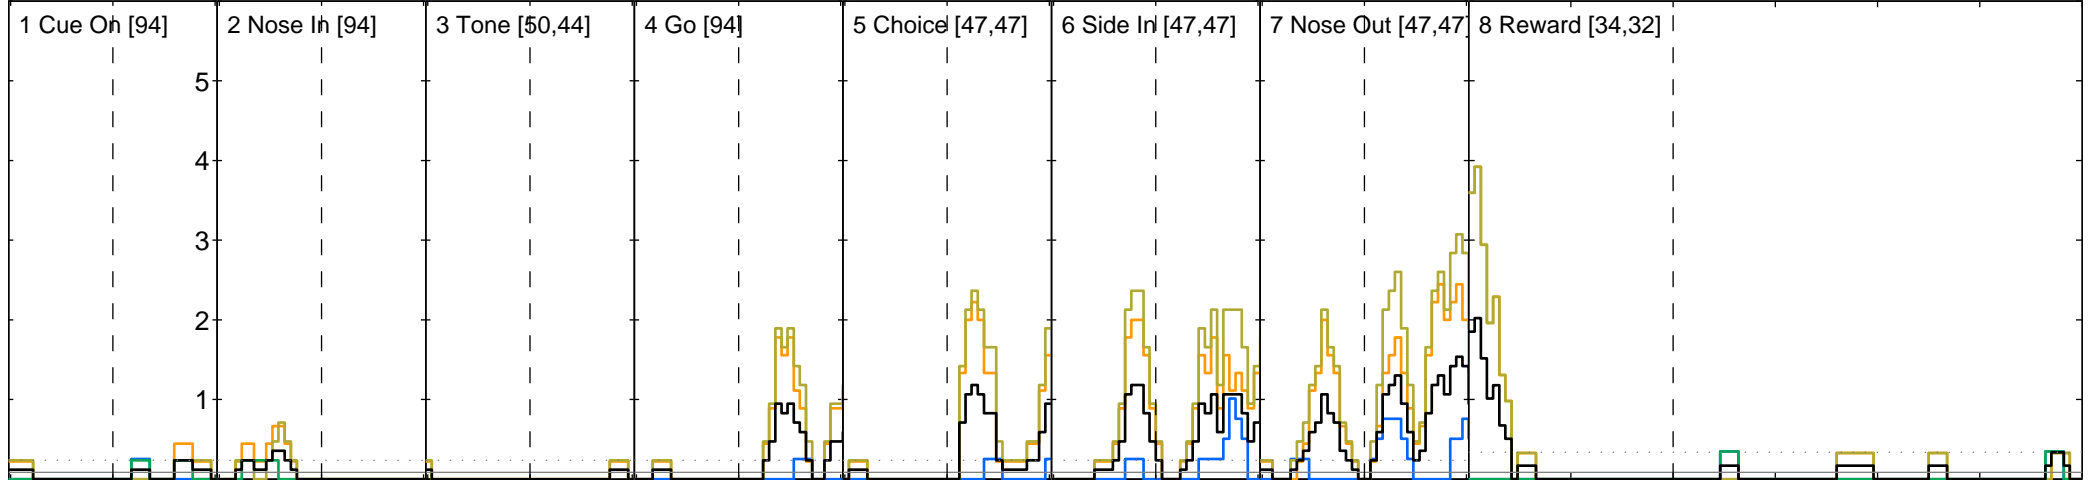

**Cell: C0320070619T07d**

AP: 0.96 ML: 3.6 DV: 5.8  
w: 2 n: 227  $P_{ISI>2}$ : 1  
1/2pw: 226 $\mu$ s p->v: 843 $\mu$ s  
 $\beta_T$ : NaN  $\beta_D$ : NaN  
 $\beta_P$ : NaN SI: NaN  
Session FR: 0.0538 Hz  
Pk Ev: None  
Pk FR: --

MSN

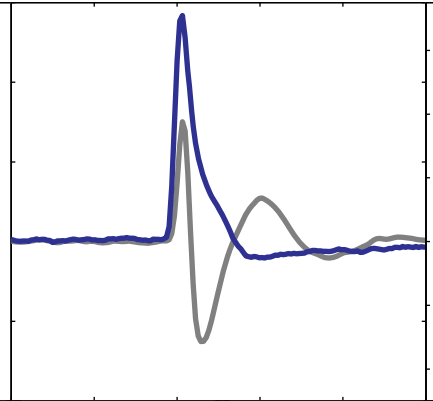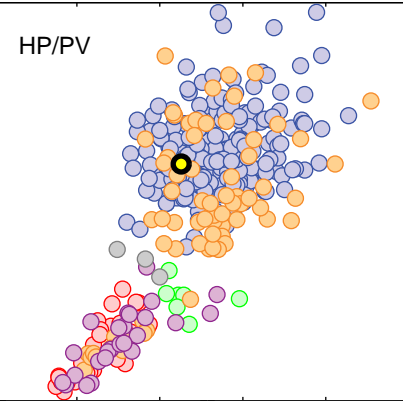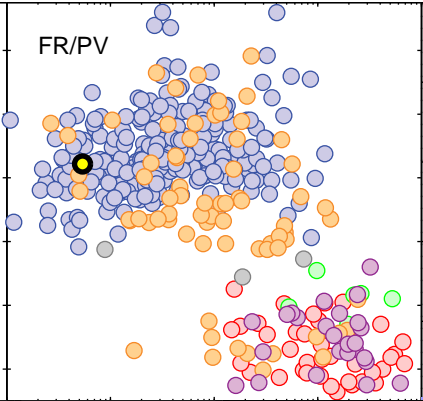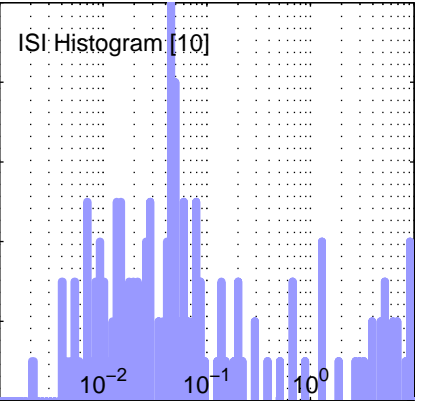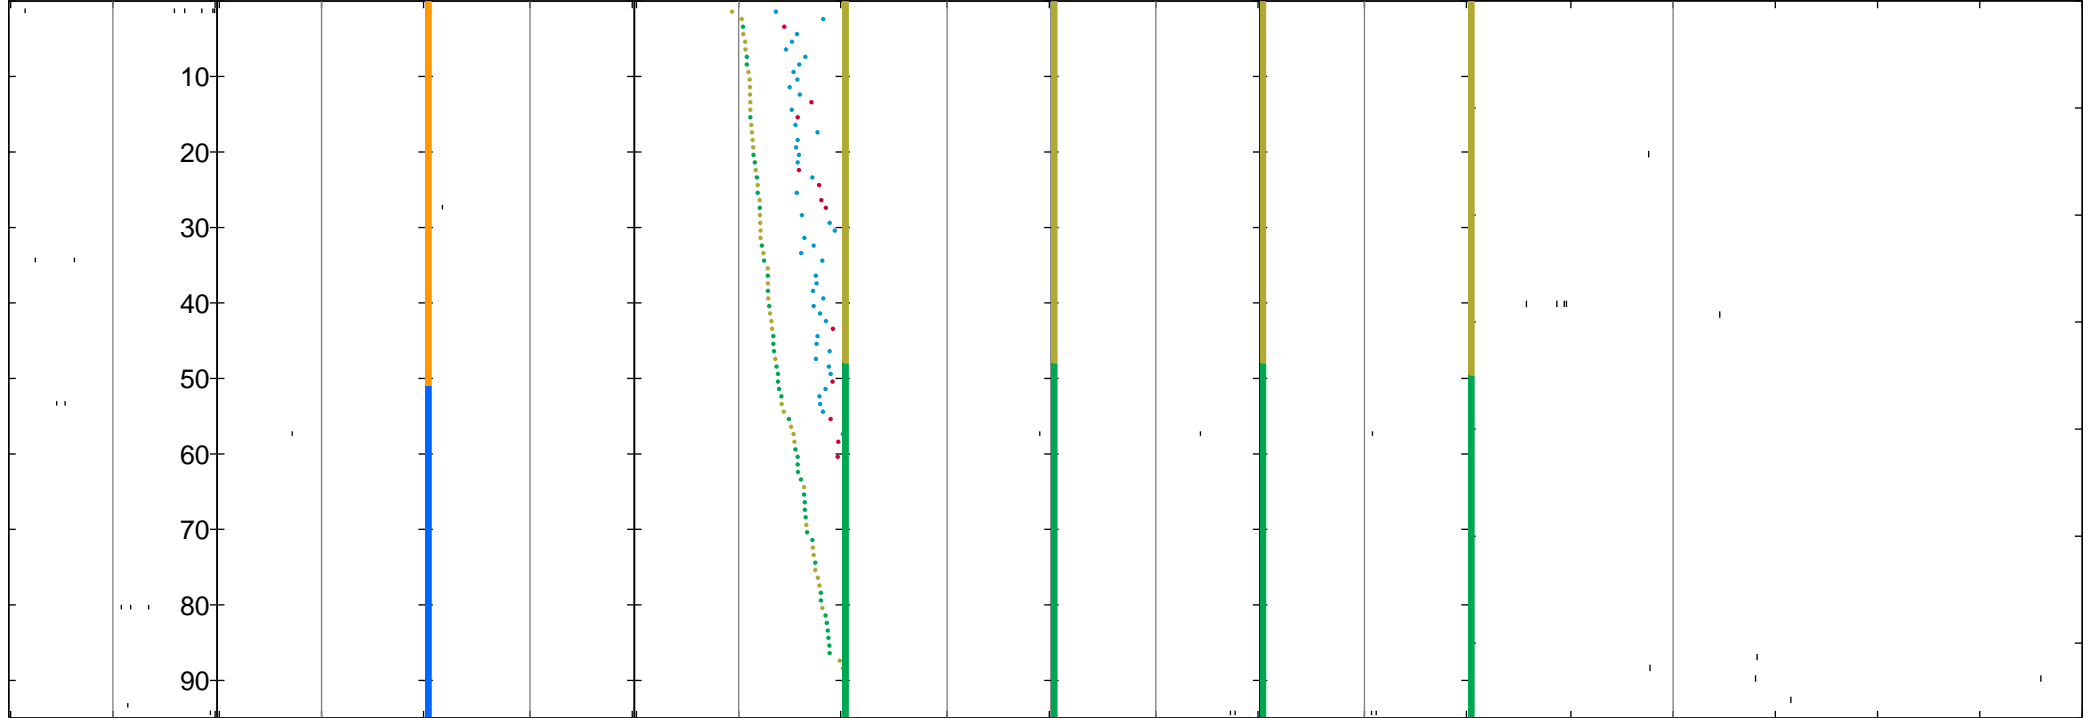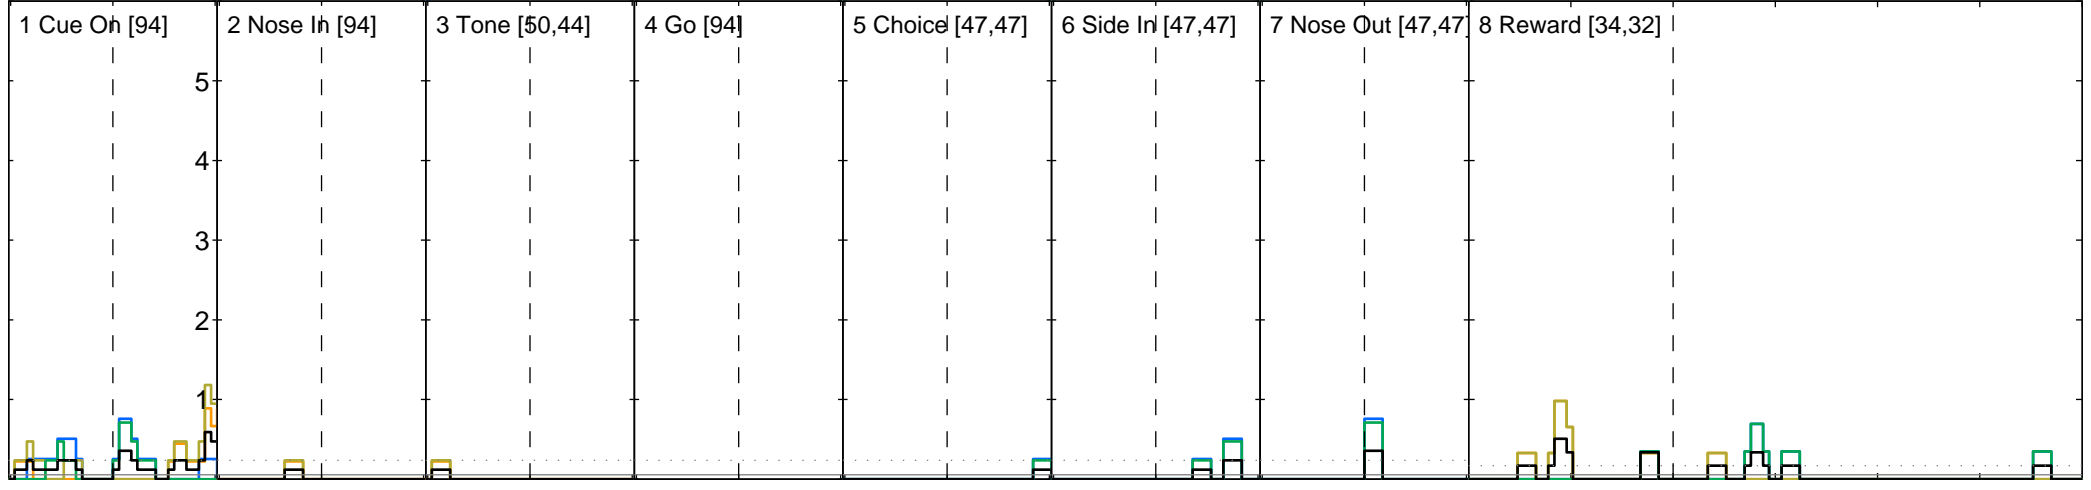

**Cell: C0320070619T09c**

AP: 1.6 ML: 3.7 DV: 5  
w: 2 n: 189  $P_{ISI>2}$ : 0.99  
1/2pw: 294 $\mu$ s p->v: 842 $\mu$ s  
 $\beta_T$ : NaN  $\beta_D$ : NaN  
 $\beta_P$ : NaN SI: NaN  
Session FR: 0.0452 Hz  
Pk Ev: None  
Pk FR: --

MSN

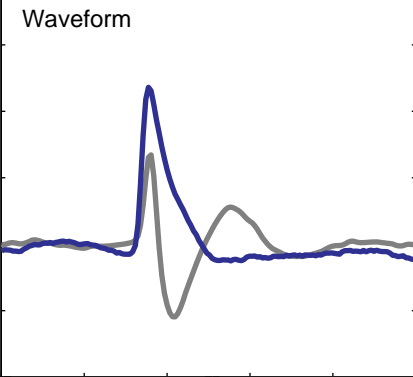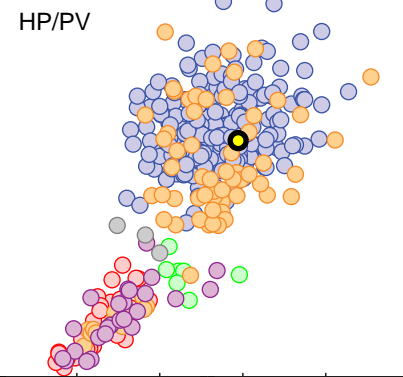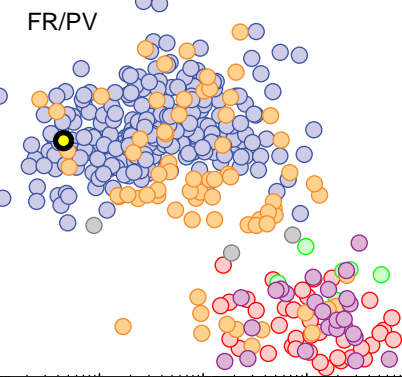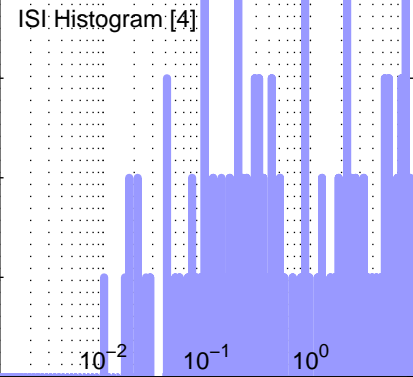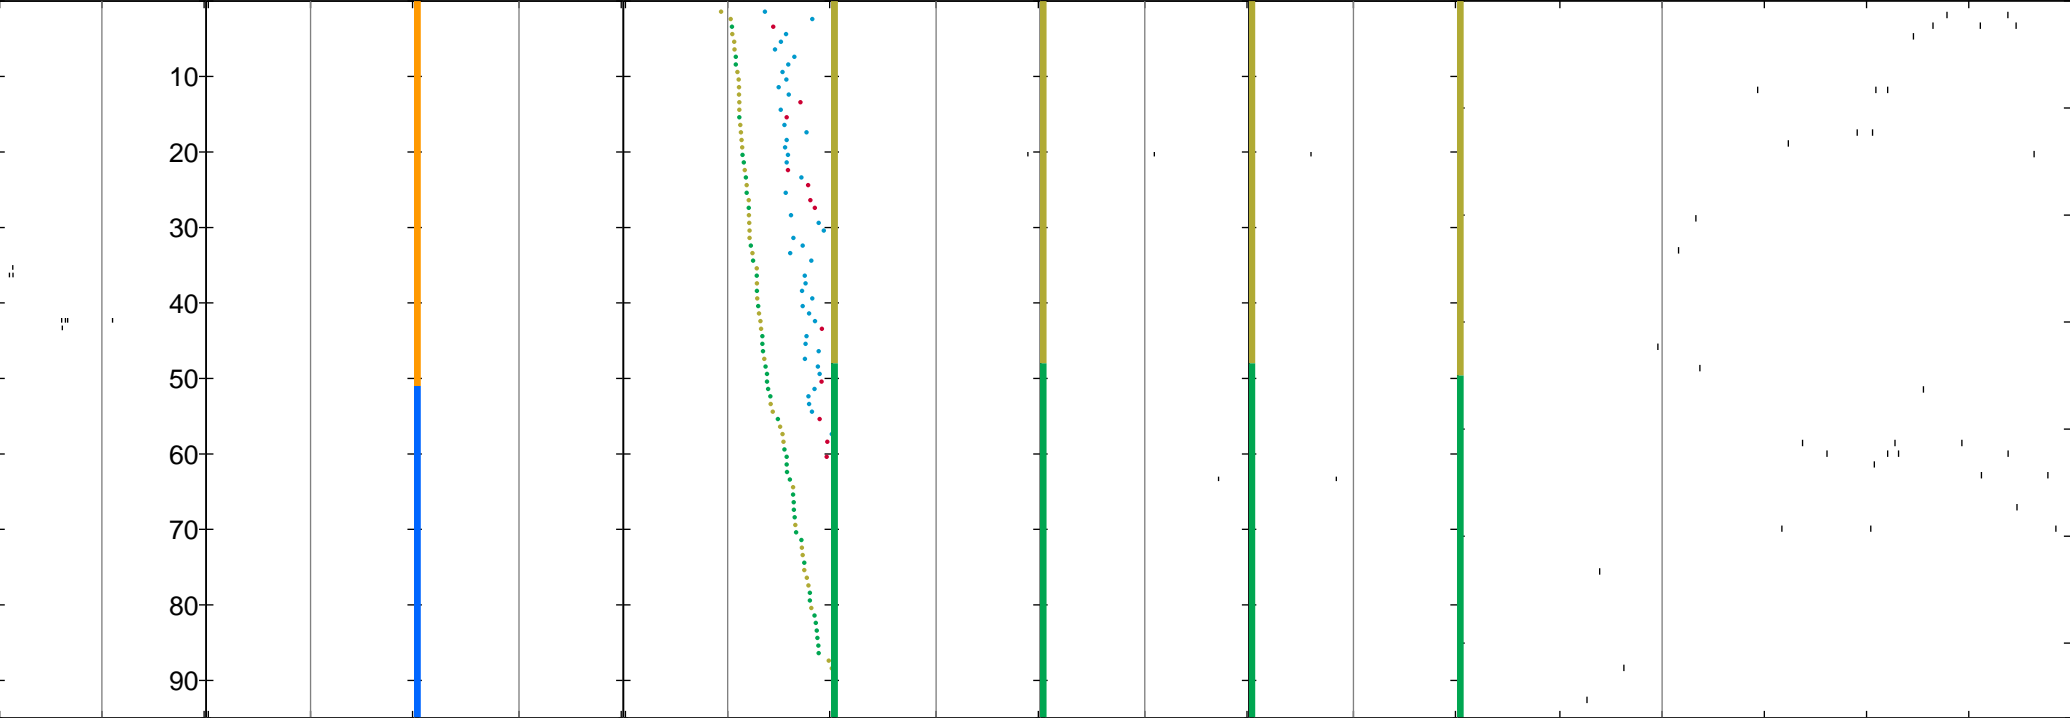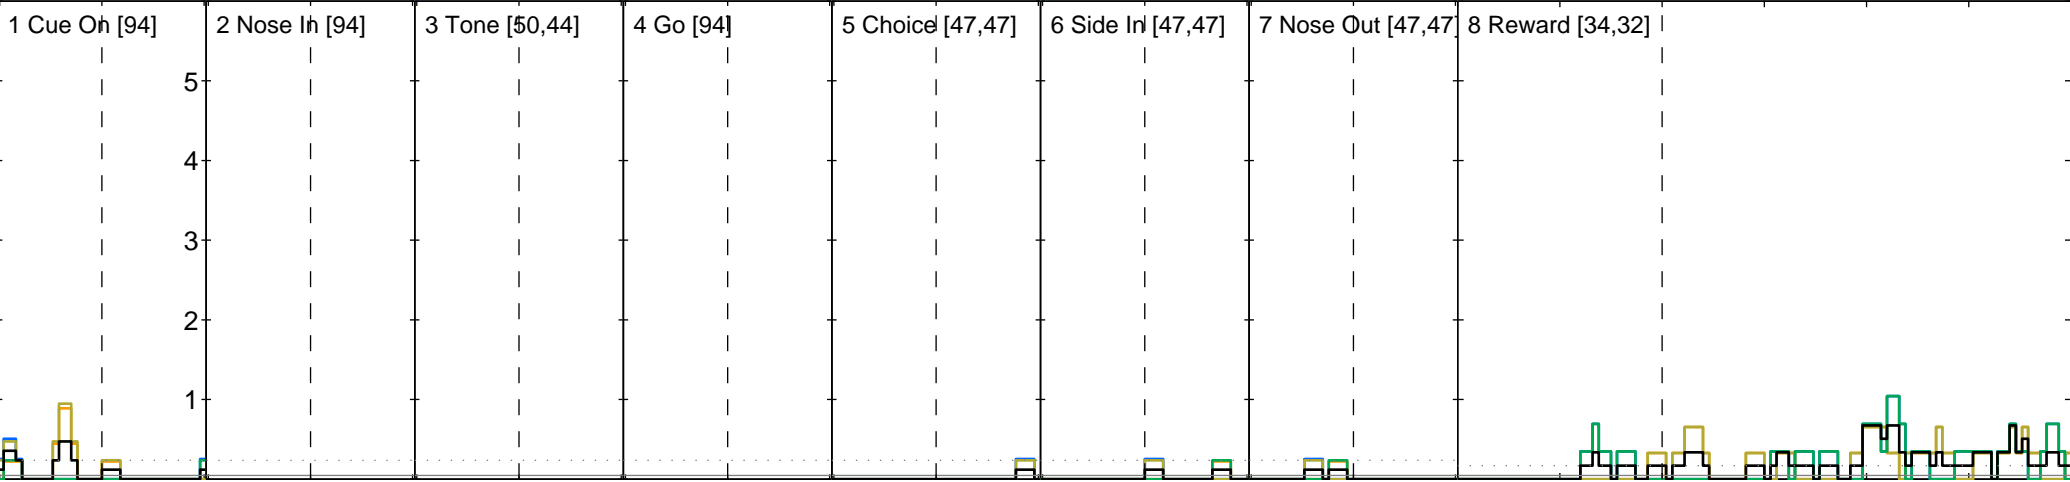

**Cell: C0320070619T09F**

AP: 1.6 ML: 3.7 DV: 5  
w: 3 n: 1404  $P_{ISI>2}$ : 0.92  
1/2pw: 200 $\mu$ s p->v: 792 $\mu$ s  
 $\beta_T$ : NaN  $\beta_D$ : NaN  
 $\beta_P$ : NaN SI: NaN  
Session FR: 0.331 Hz  
Pk Ev: None  
Pk FR: --

MSN

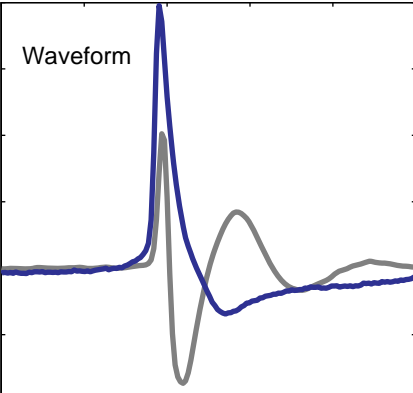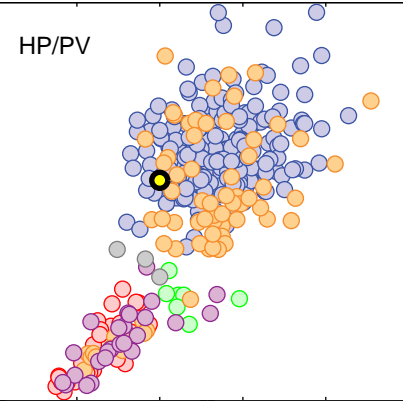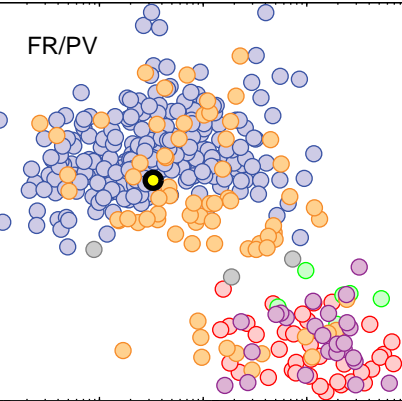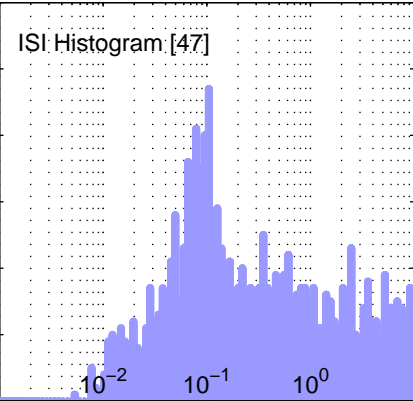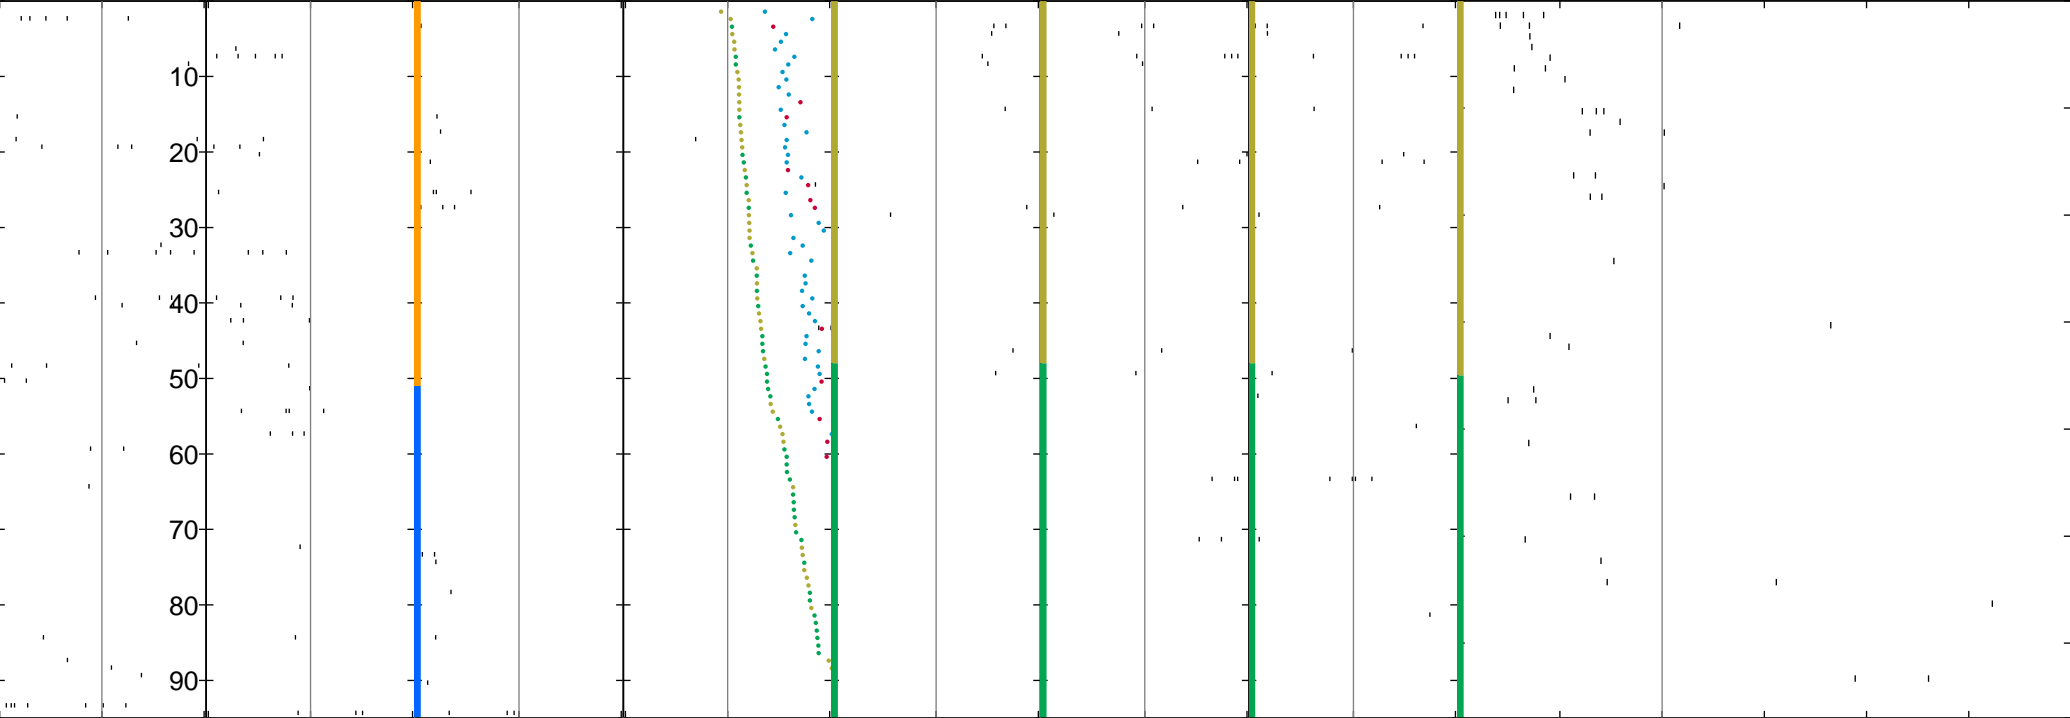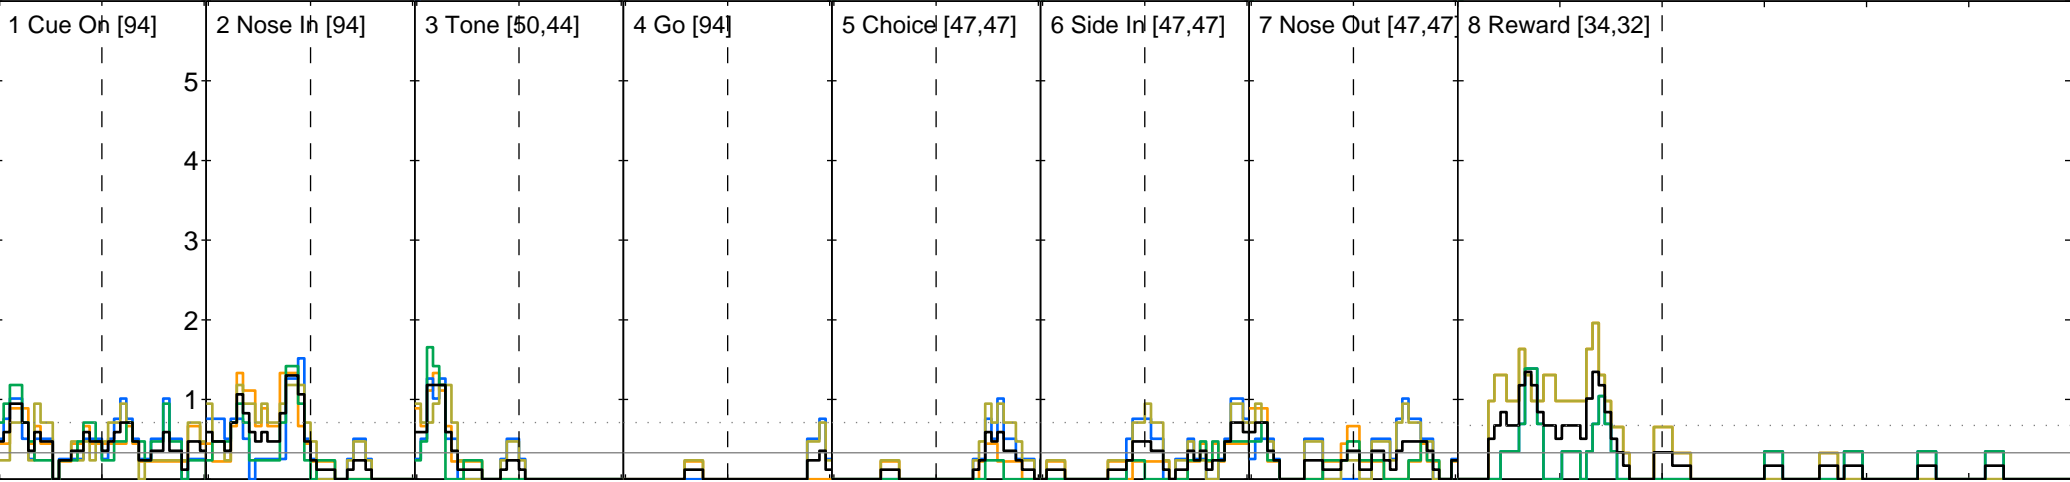

**Cell: C0320070621T07c**

AP: 0.96 ML: 3.6 DV: 6  
w: 4 n: 349  $P_{ISI>2}$ : 0.98  
1/2pw: 226 $\mu$ s p->v: 878 $\mu$ s  
 $\beta_T$ : NaN  $\beta_D$ : NaN  
 $\beta_P$ : NaN SI: NaN  
Session FR: 0.119 Hz  
Pk Ev: None  
Pk FR: --

MSN

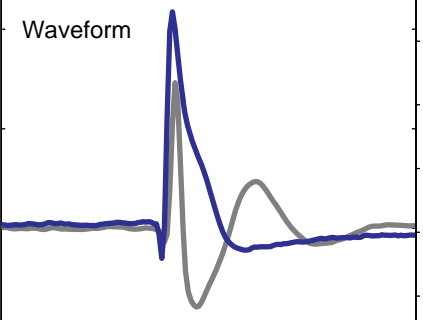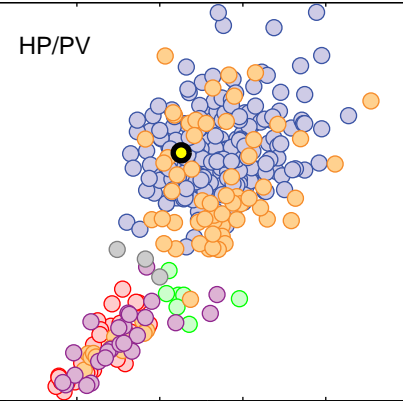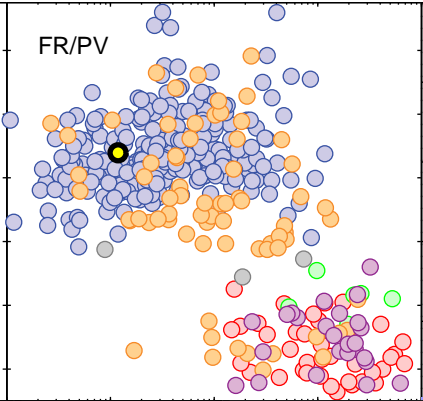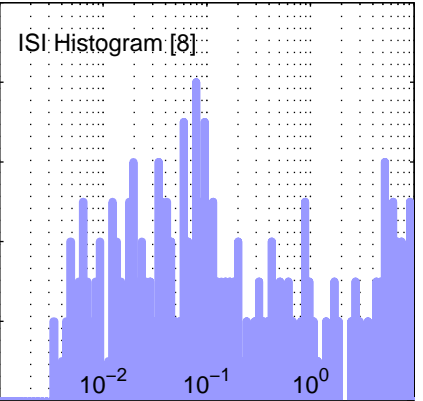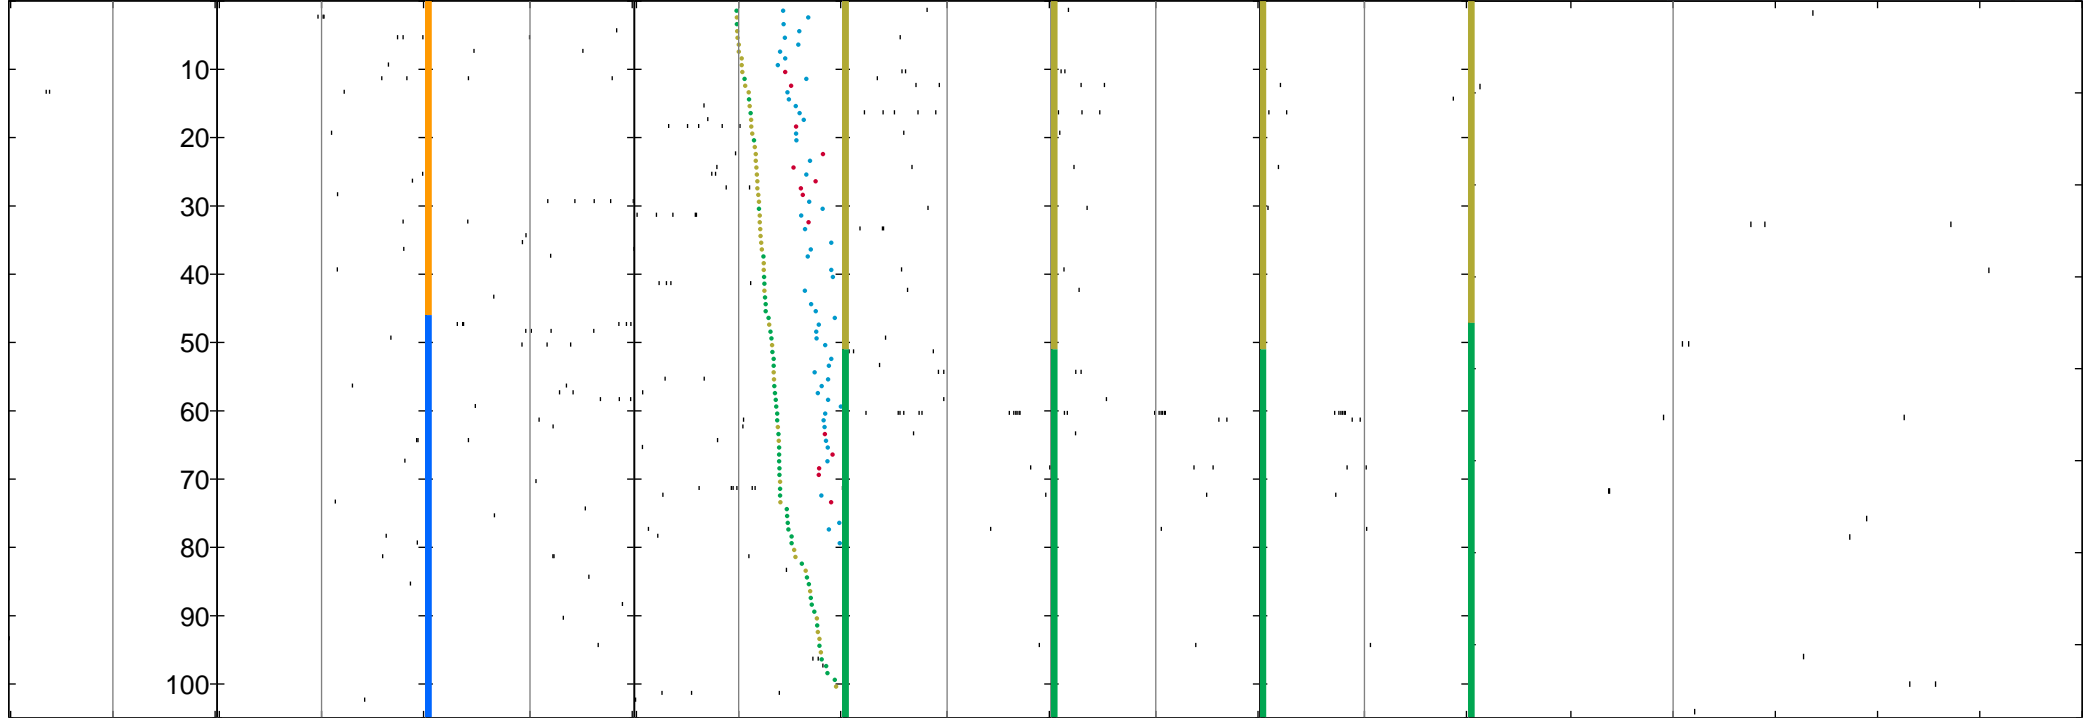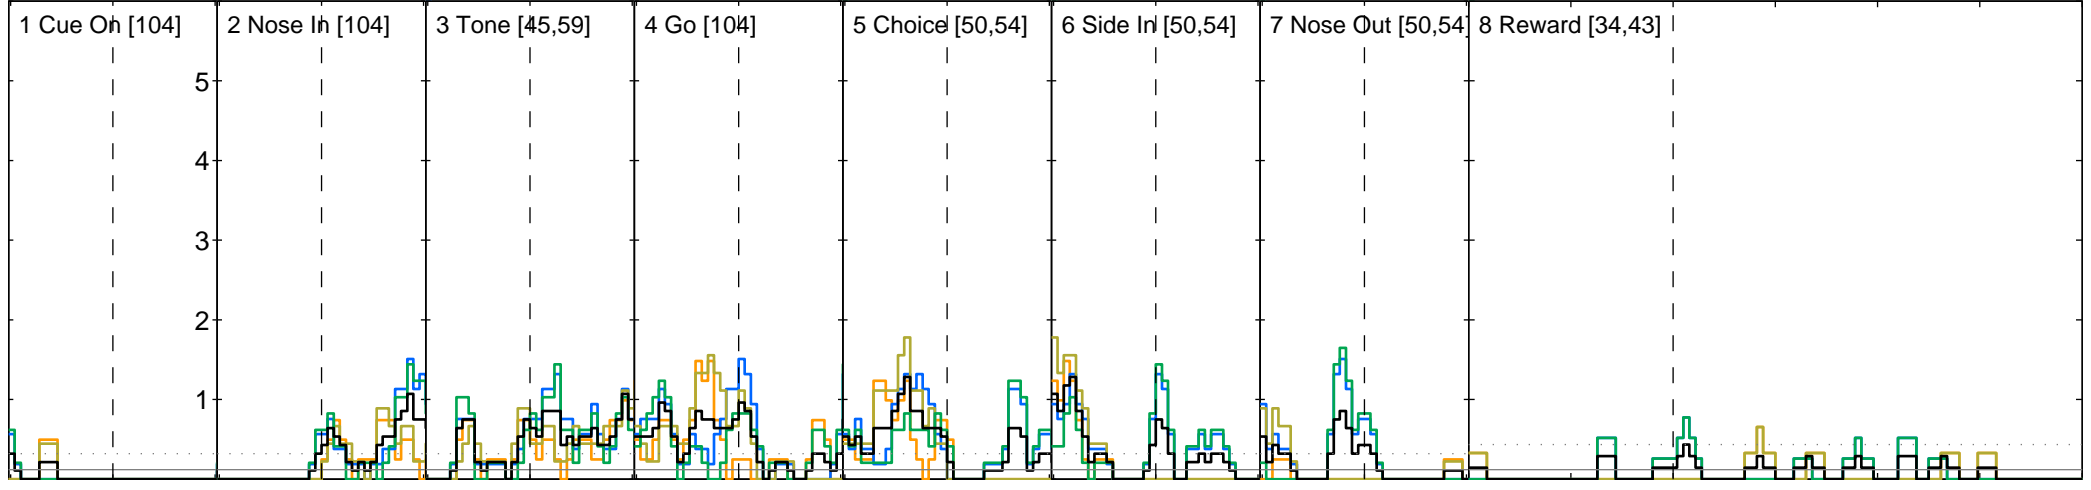

**Cell: C0320070621T09a**

AP: 1.6 ML: 3.7 DV: 5.1  
w: 2 n: 429  $P_{ISI>2}$ : 0.96  
1/2pw: 256 $\mu$ s p->v: 750 $\mu$ s  
 $\beta_T$ : NaN  $\beta_D$ : NaN  
 $\beta_P$ : NaN SI: NaN  
Session FR: 0.297 Hz  
Pk Ev: None  
Pk FR: --

MSN

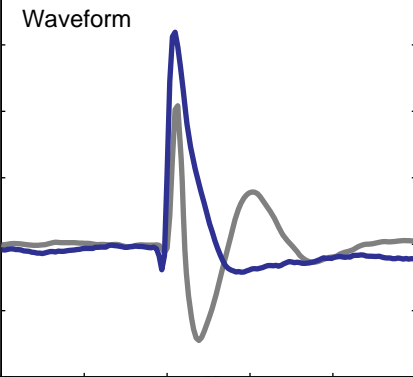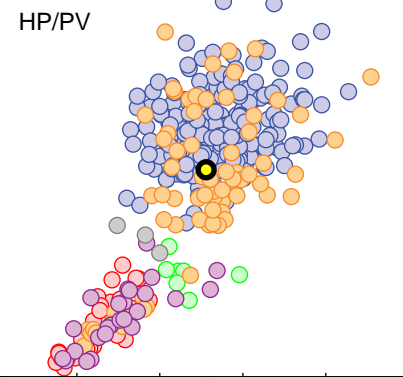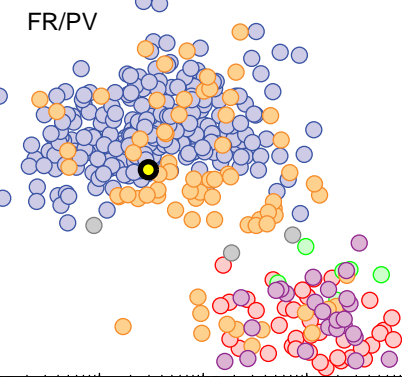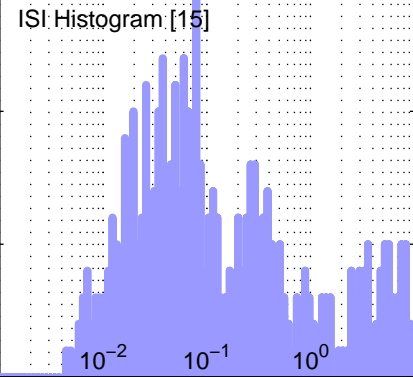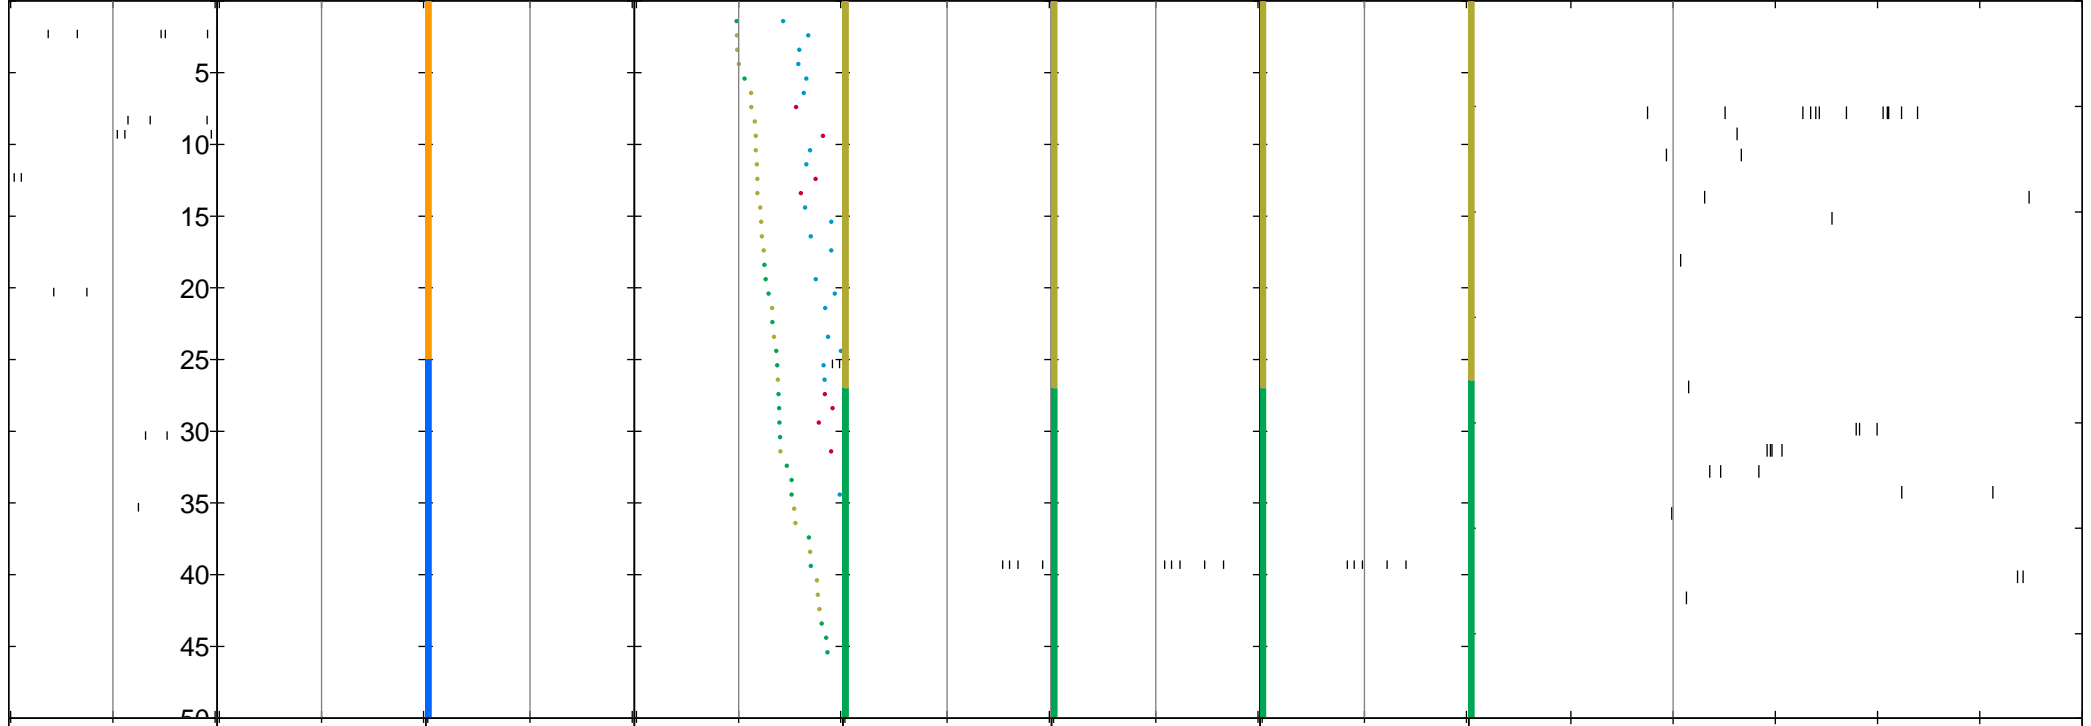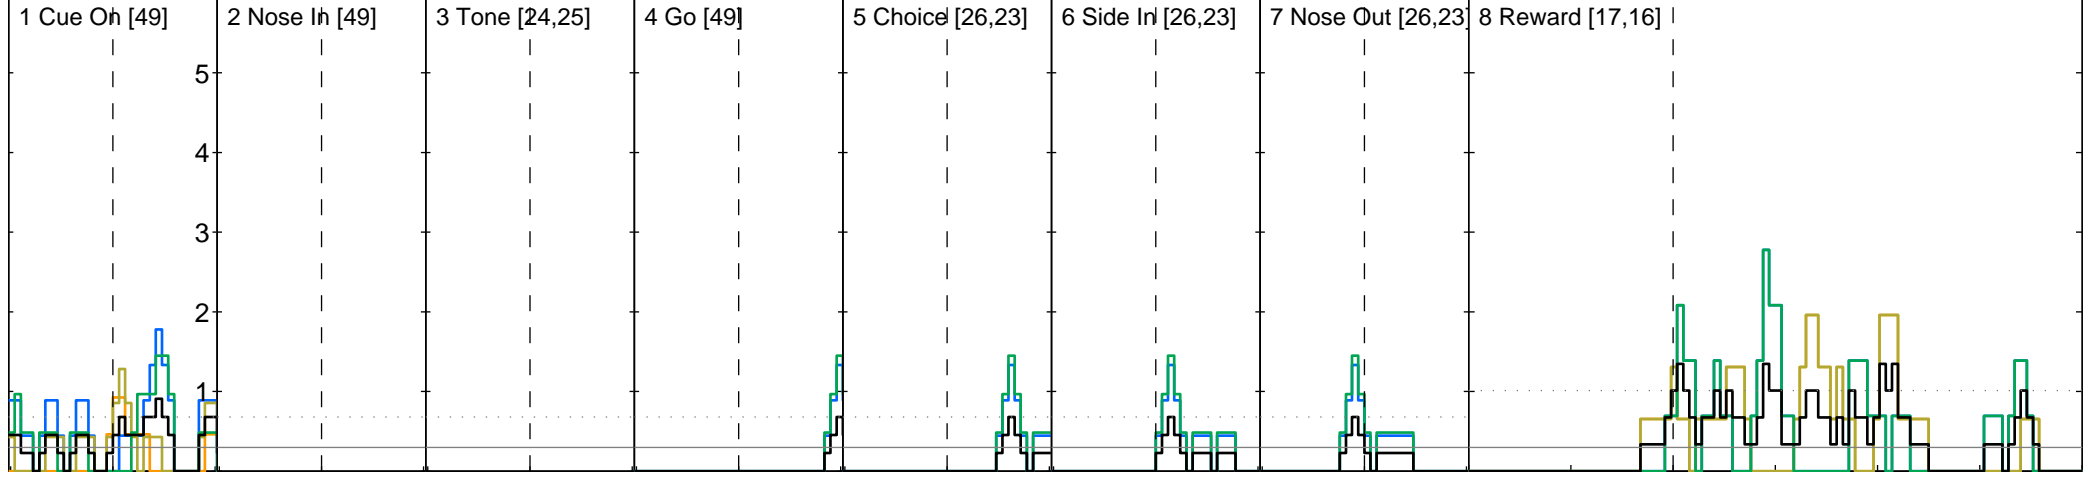



**Cell: C0320070621T09b**

AP: 1.6 ML: 3.7 DV: 5.1  
w: 2 n: 110  $P_{ISI>2}$ : 0.98  
1/2pw: 246 $\mu$ s p->v: 694 $\mu$ s  
 $\beta_T$ : NaN  $\beta_D$ : NaN  
 $\beta_P$ : NaN SI: NaN  
Session FR: 0.0925 Hz  
Pk Ev: None  
Pk FR: --

MSN

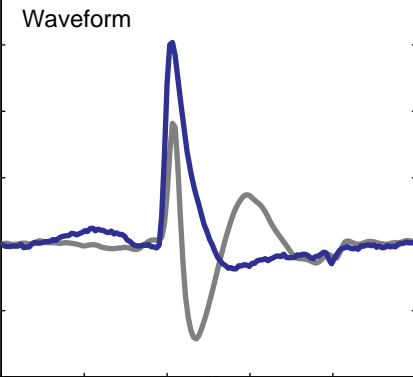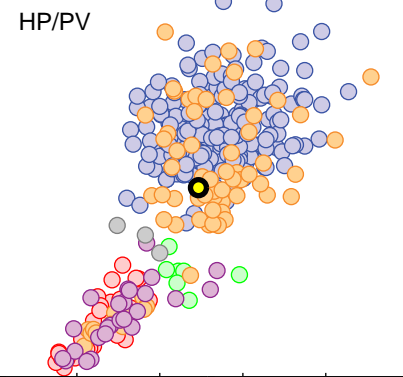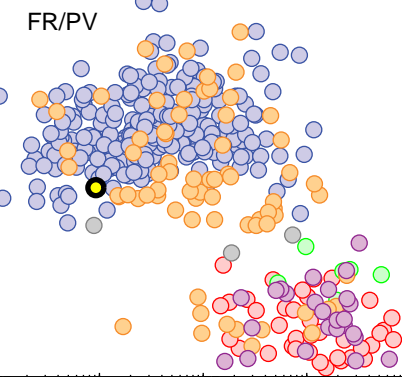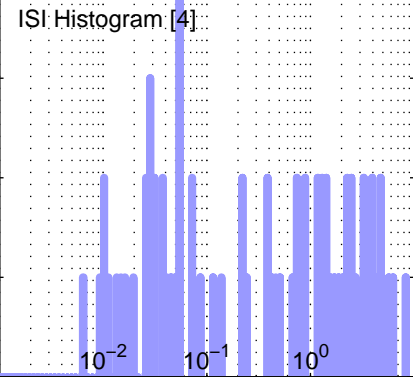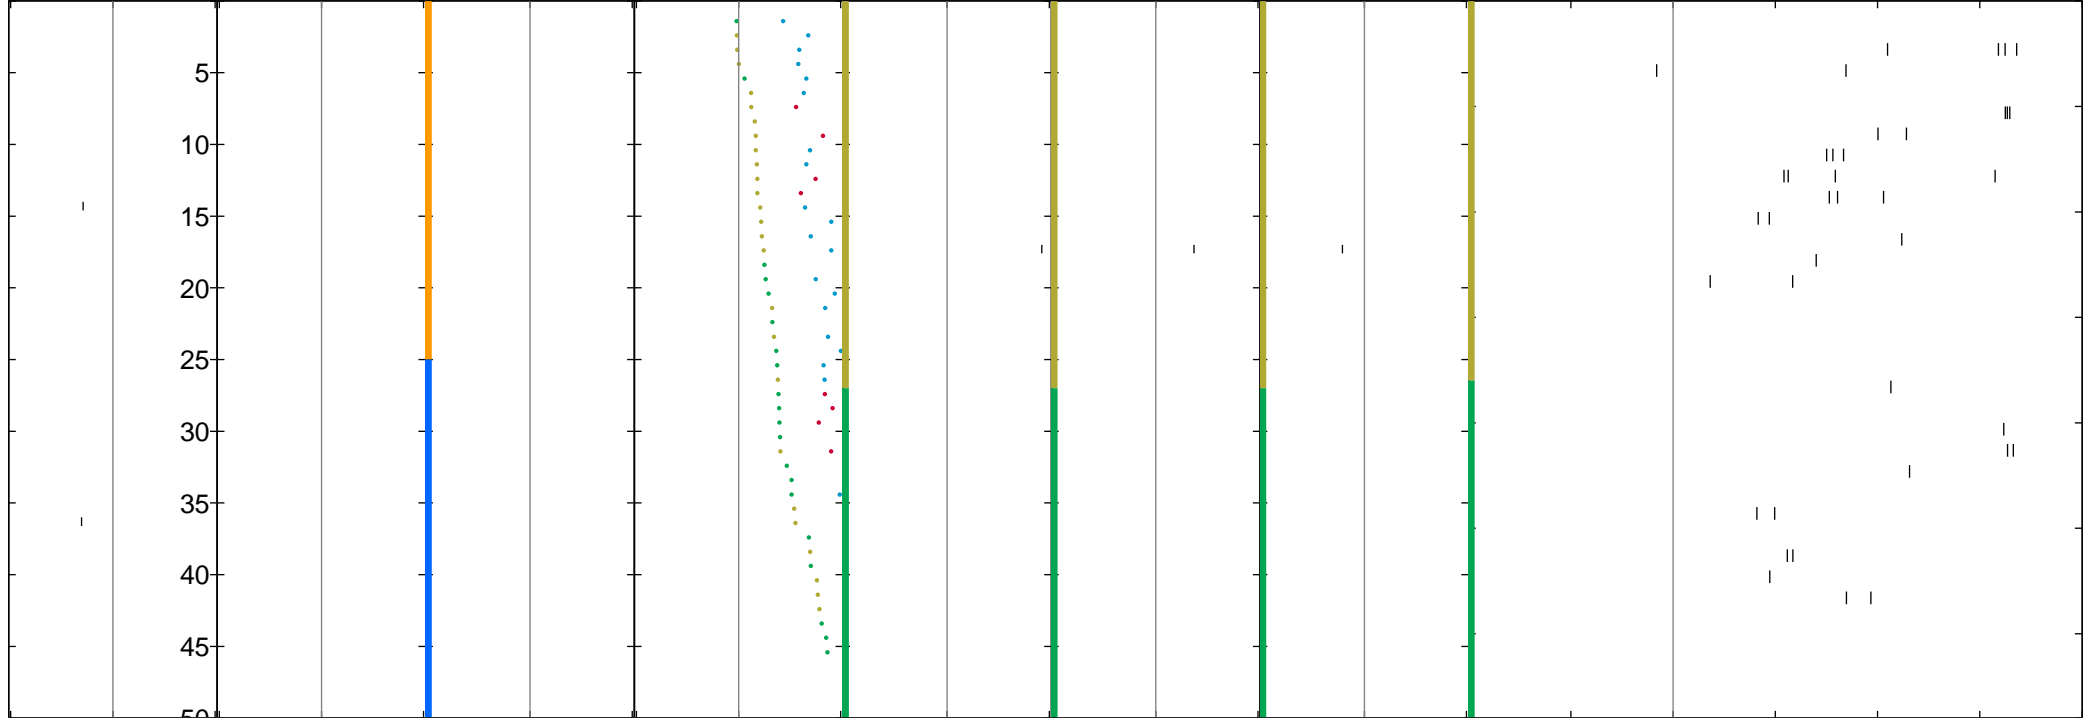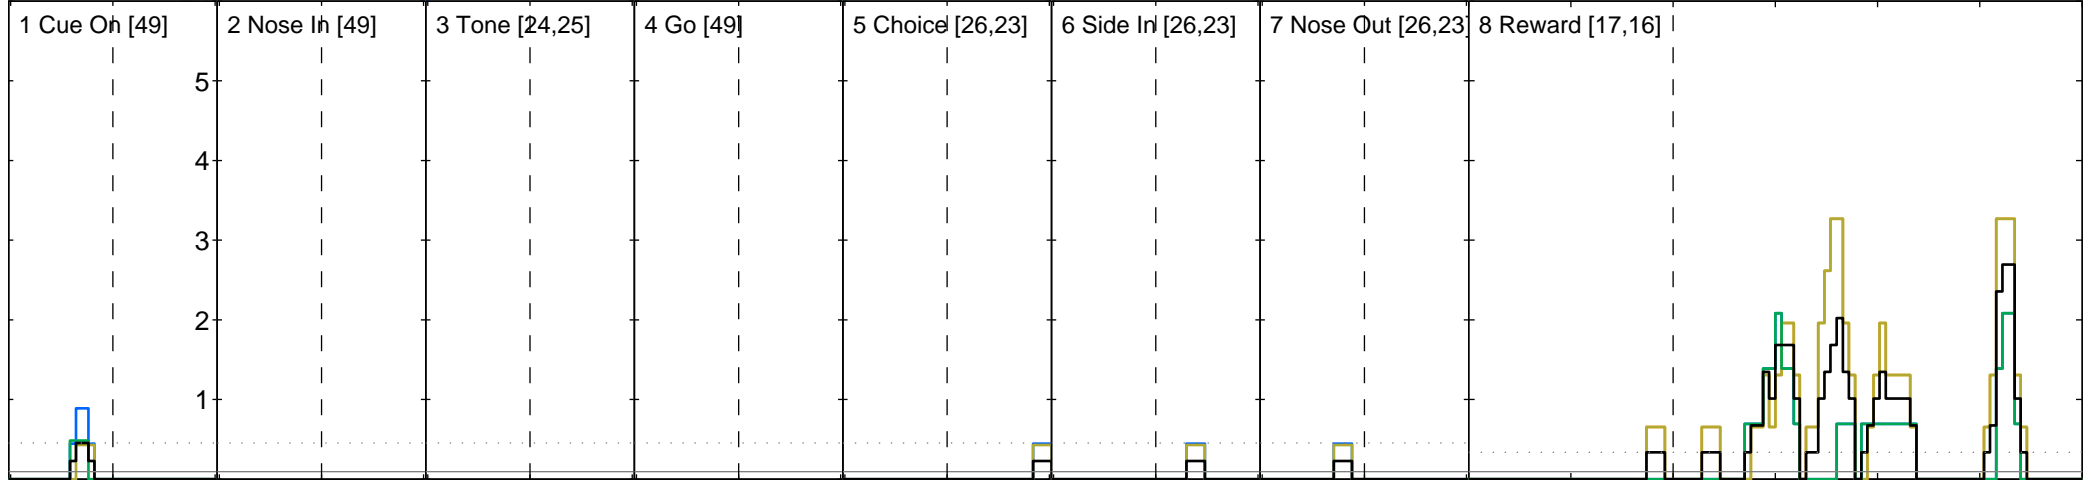

**Cell: C0320070621T09c**

AP: 1.6 ML: 3.7 DV: 5.1  
w: 2 n: 278  $P_{ISI>2}$ : 0.95  
1/2pw: 240 $\mu$ s p->v: 731 $\mu$ s  
 $\beta_T$ : NaN  $\beta_D$ : NaN  
 $\beta_P$ : NaN SI: NaN  
Session FR: 0.193 Hz  
Pk Ev: None  
Pk FR: --

MSN

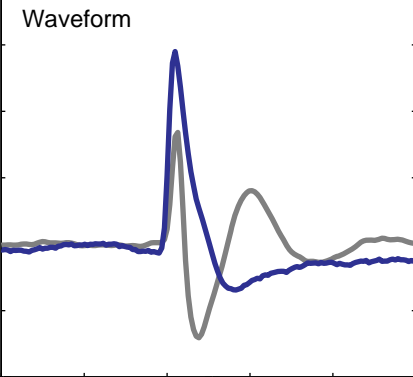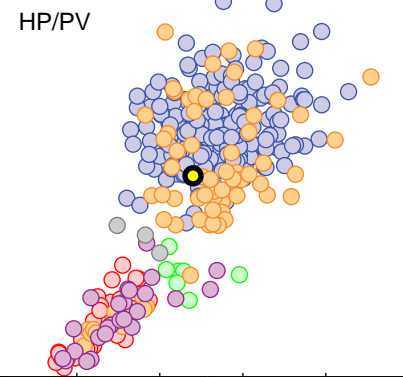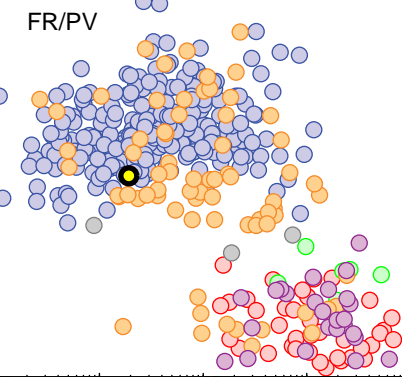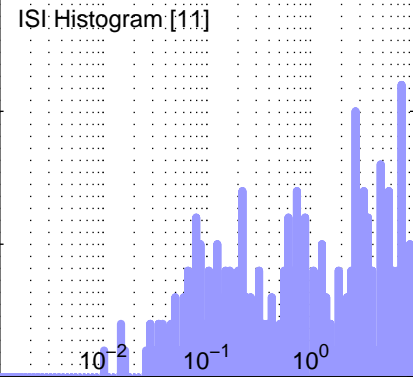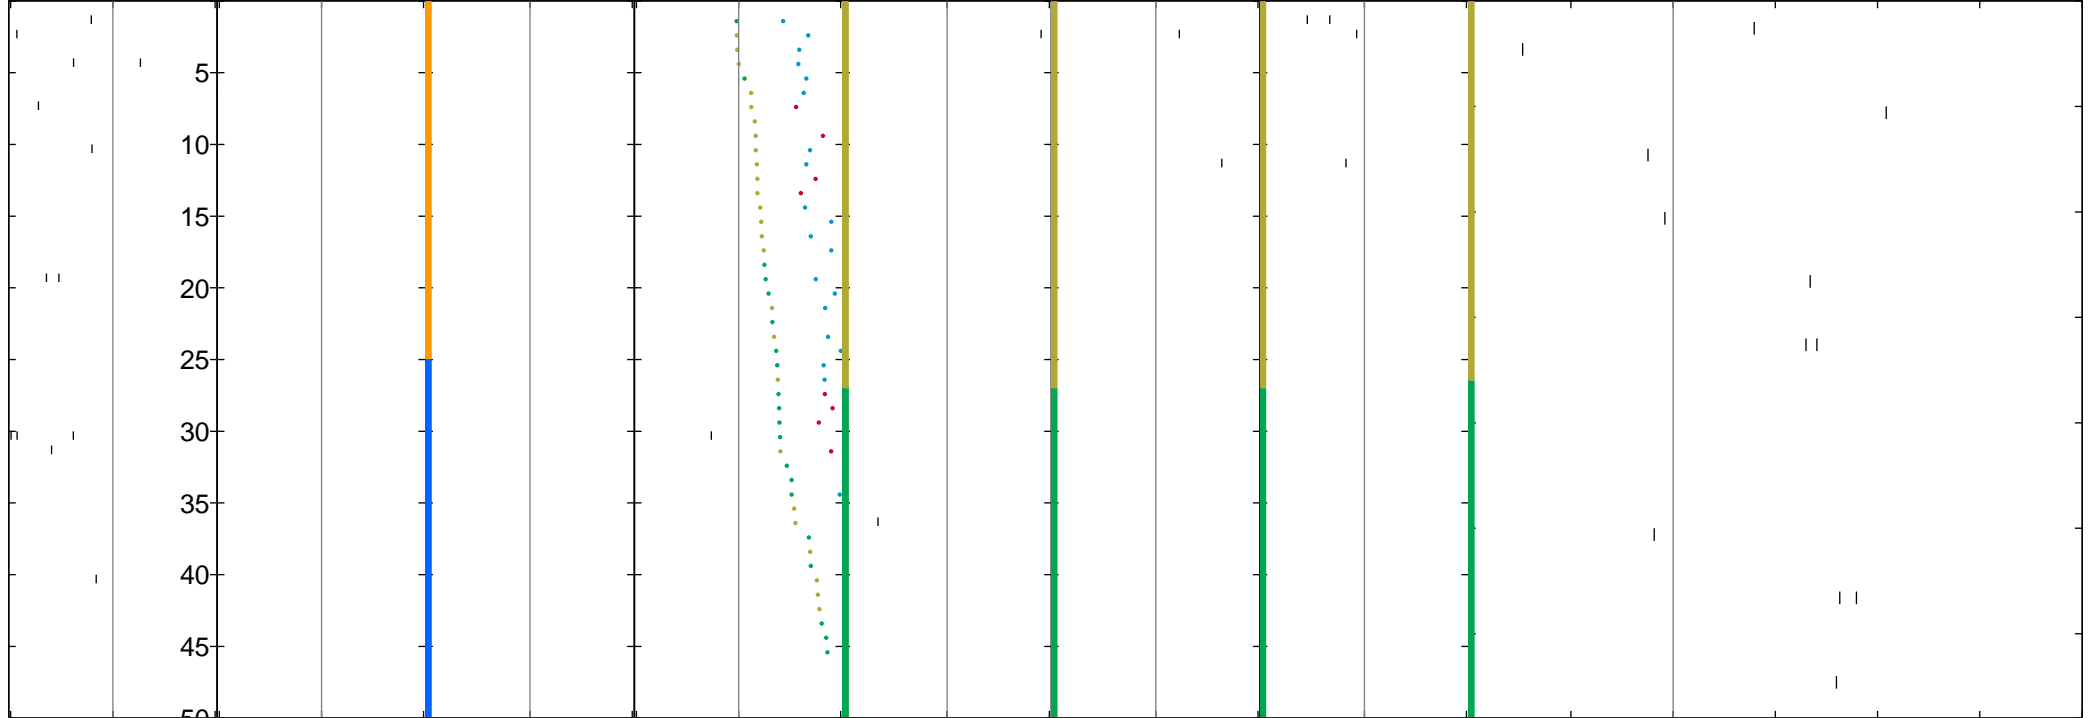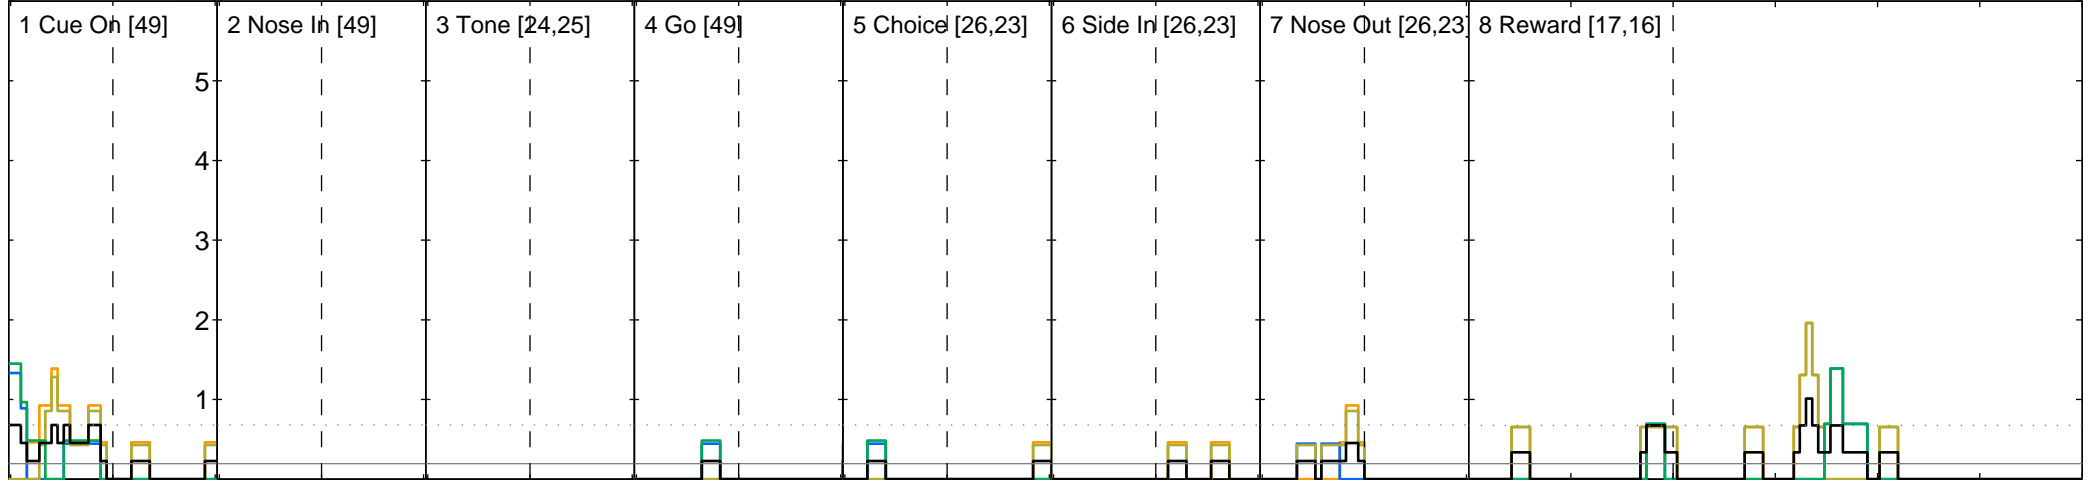

**Cell: C0320070622T07b**

AP: 0.96 ML: 3.6 DV: 6.1  
w: 2 n: 3086  $P_{ISI>2}$ : 0.72  
1/2pw: 373 $\mu$ s p->v: 970 $\mu$ s  
 $\beta_T$ : NaN  $\beta_D$ : NaN  
 $\beta_P$ : NaN SI: NaN  
Session FR: 0.78 Hz  
Pk Ev: None  
Pk FR: --

MSN

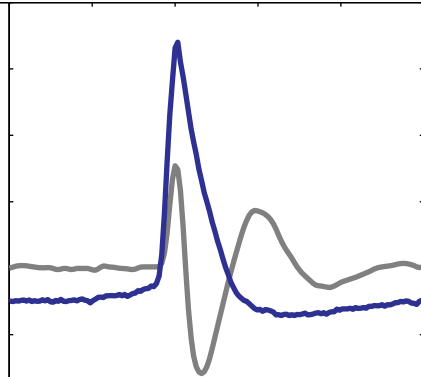

HP/PV

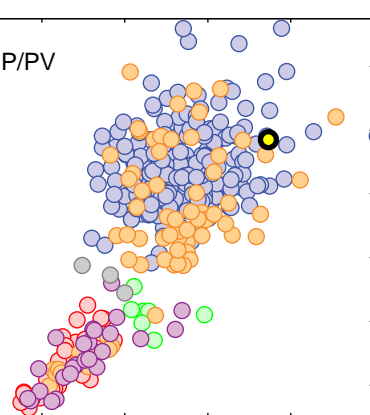

FR/PV

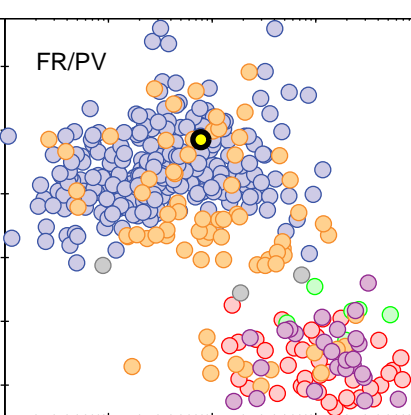

ISI Histogram [71]

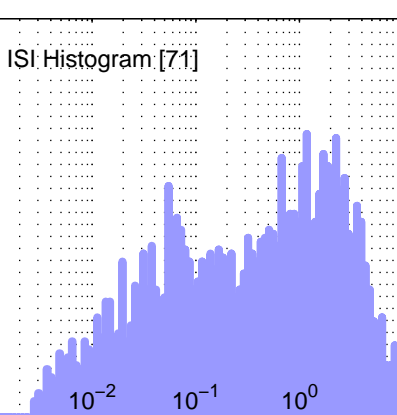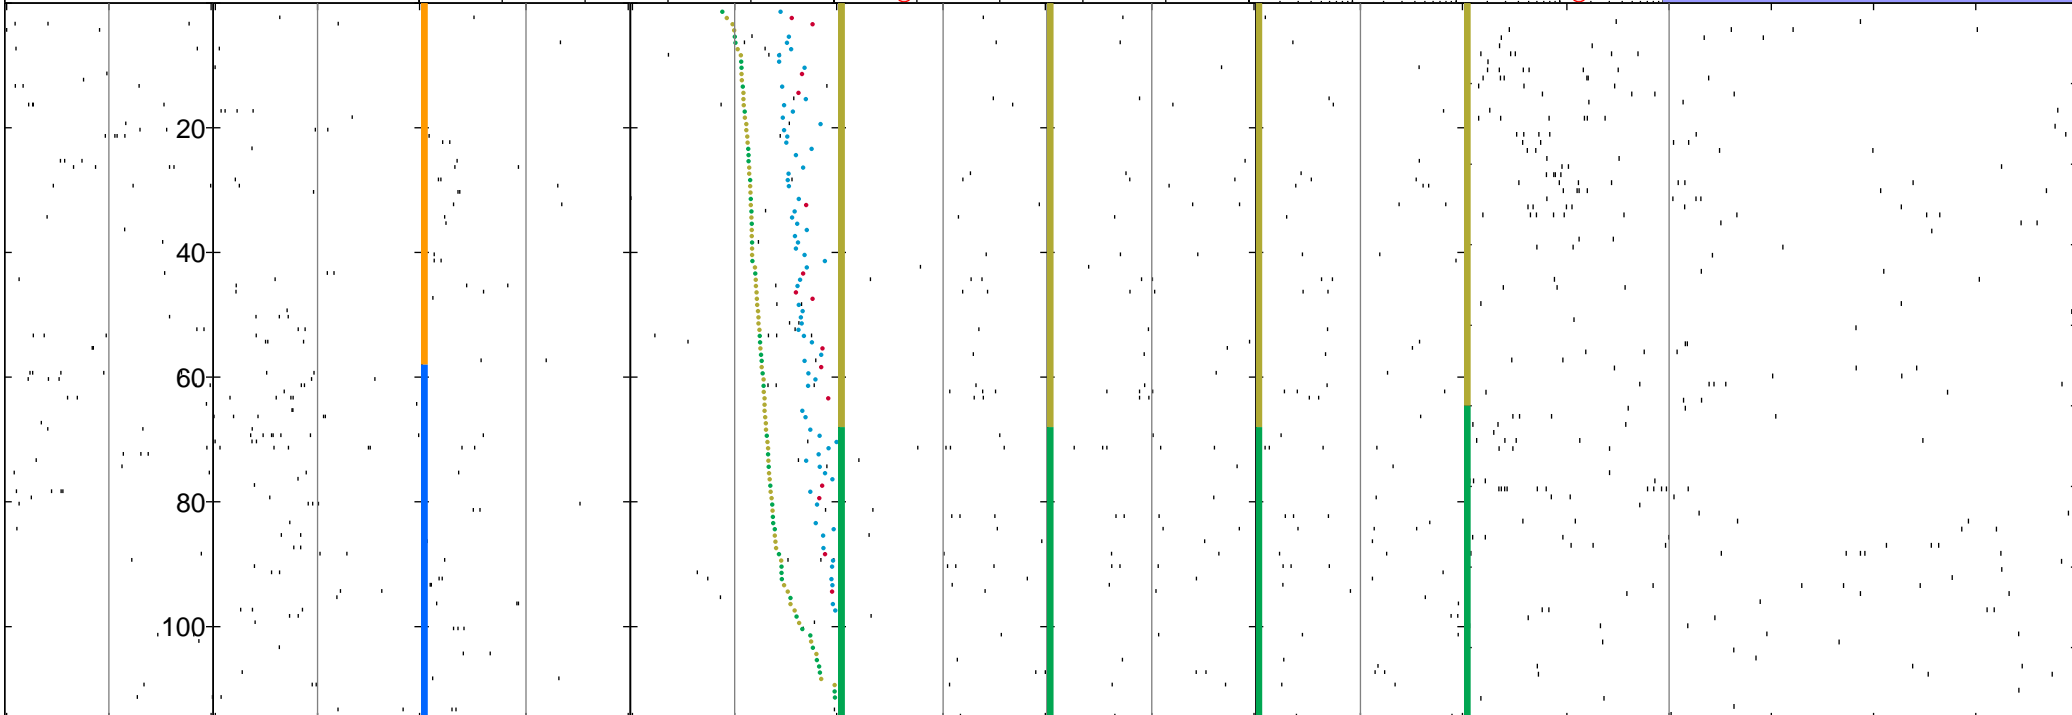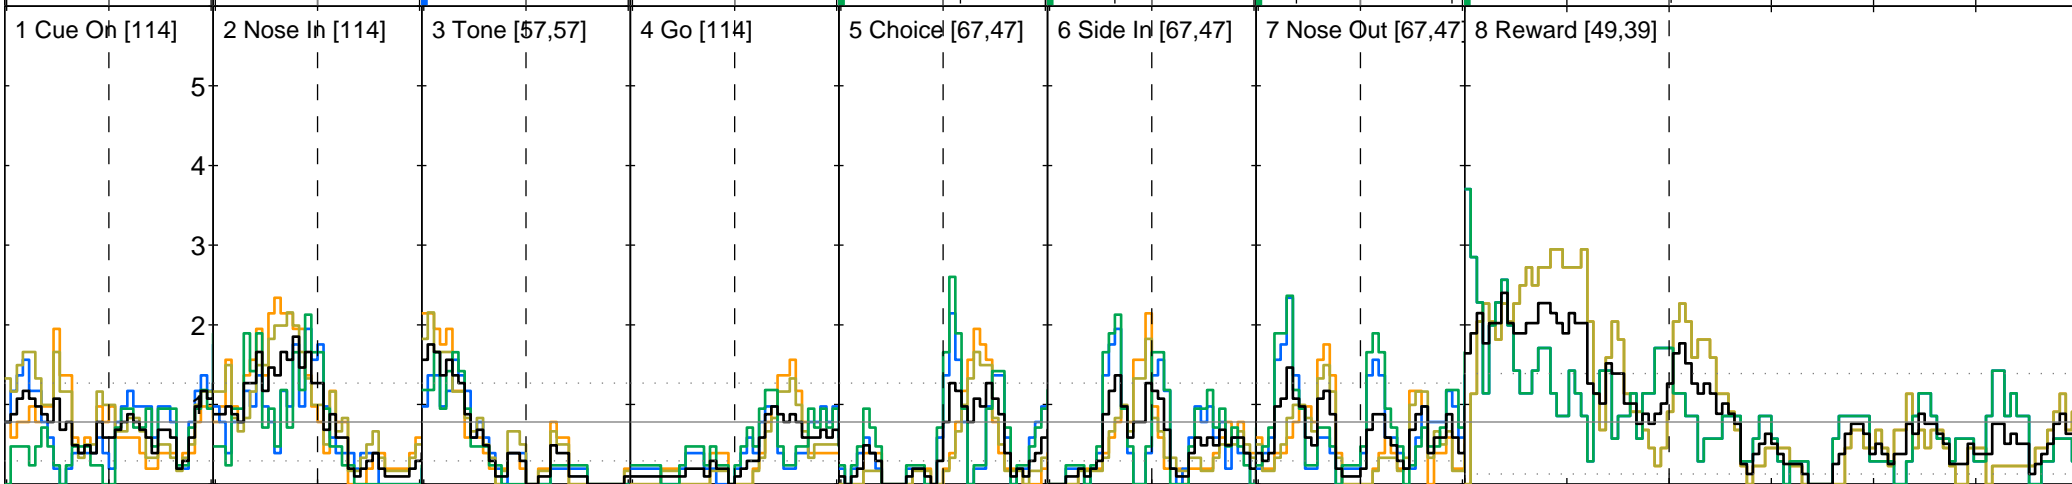

**Cell: C0320070622T11a**

AP: -0.96 ML: 3.7 DV: 5.8  
w: 1 n: 129  $P_{ISI>2}$ : 1  
1/2pw: 258 $\mu$ s p->v: 808 $\mu$ s  
 $\beta_T$ : NaN  $\beta_D$ : NaN  
 $\beta_P$ : NaN SI: NaN  
Session FR: 0.0327 Hz  
Pk Ev: None  
Pk FR: --

MSN

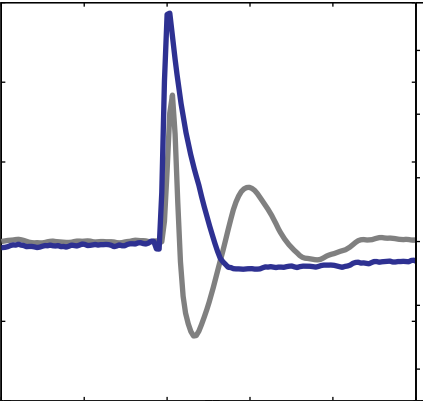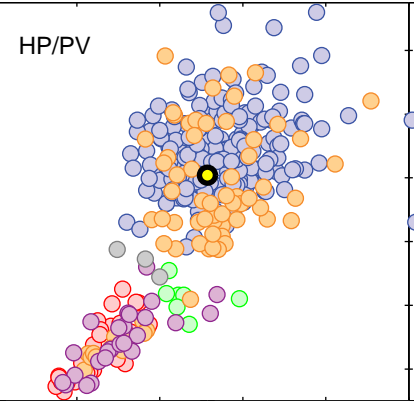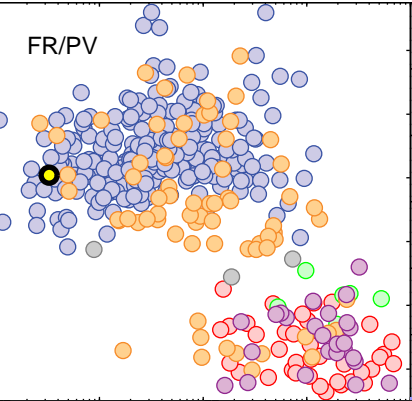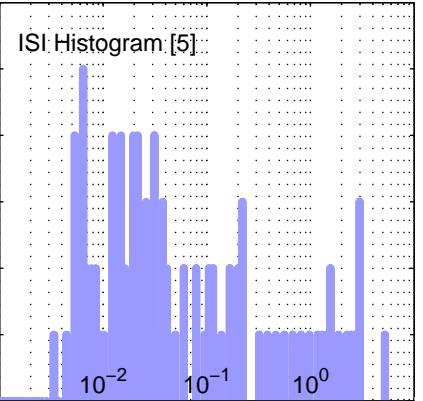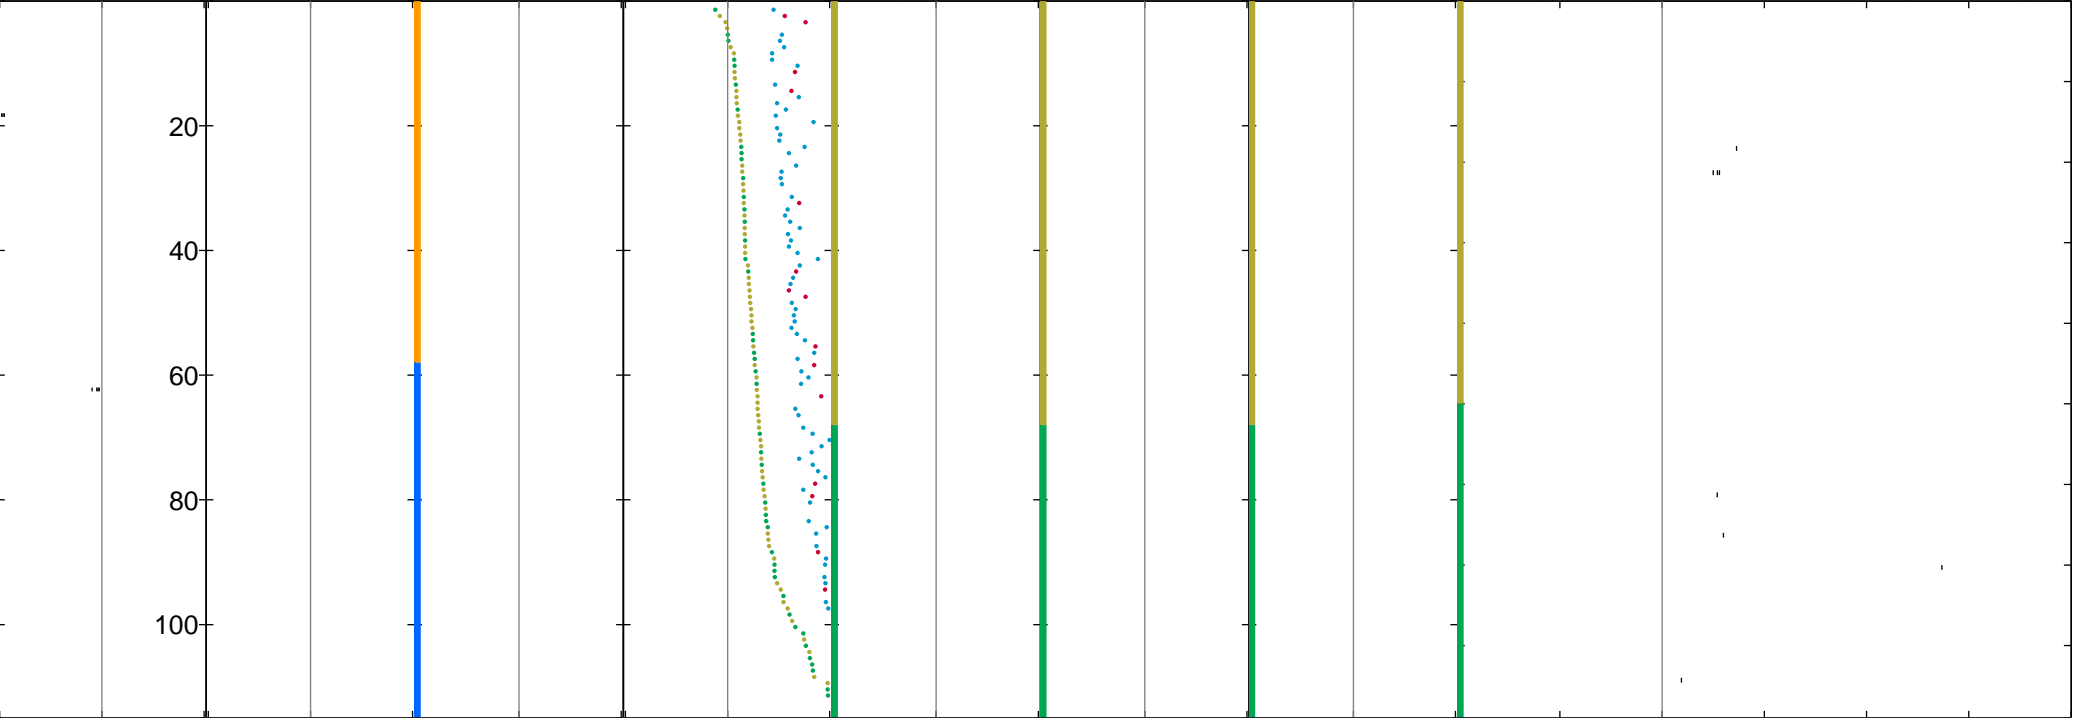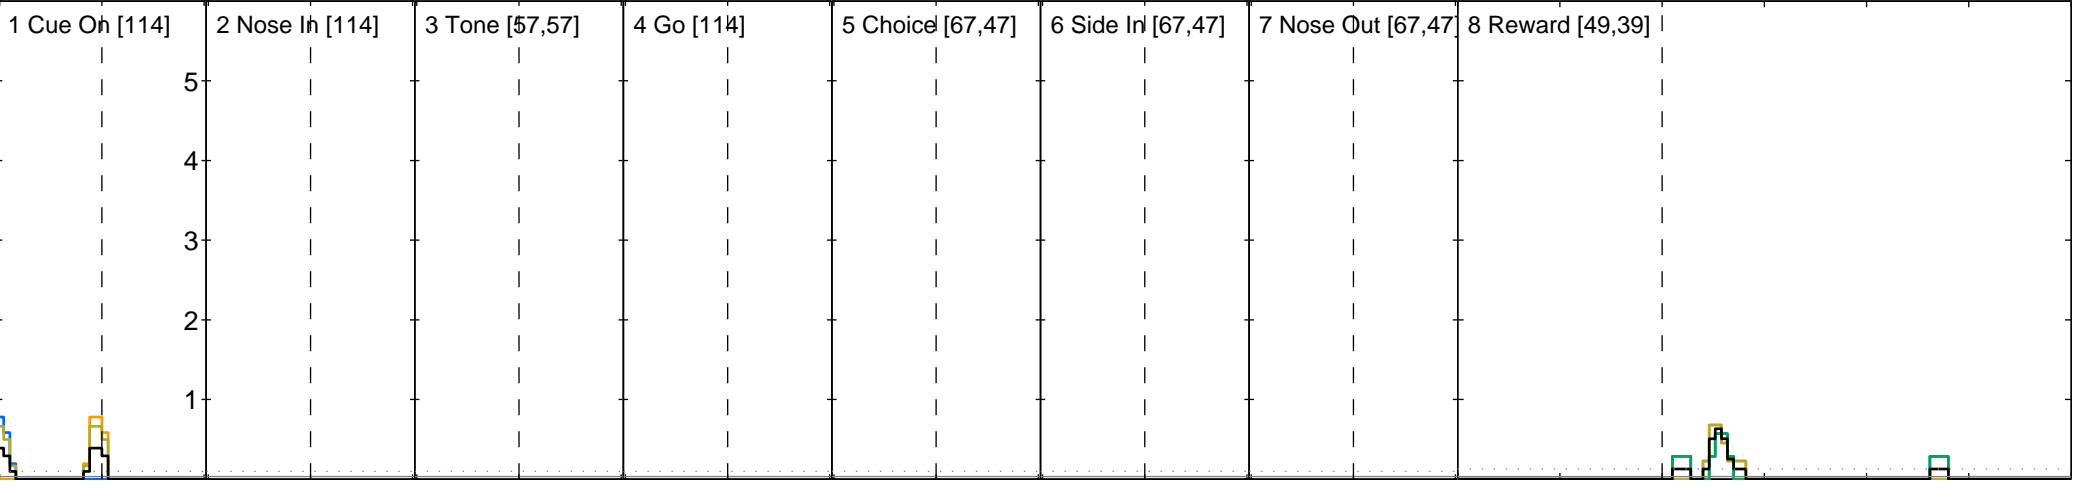

**Cell: C0320070622T11d**

AP: -0.96 ML: 3.7 DV: 5.8  
w: 4 n: 409  $P_{ISI>2}$ : 0.98  
1/2pw: 211 $\mu$ s p->v: 896 $\mu$ s  
 $\beta_T$ : NaN  $\beta_D$ : NaN  
 $\beta_P$ : NaN SI: NaN  
Session FR: 0.105 Hz  
Pk Ev: None  
Pk FR: --

MSN

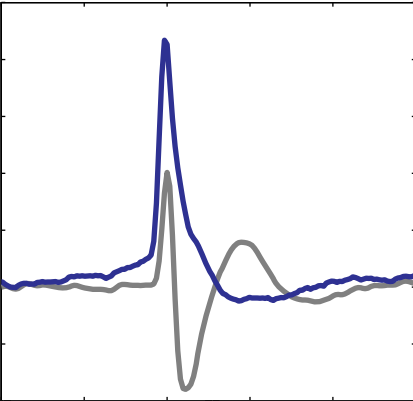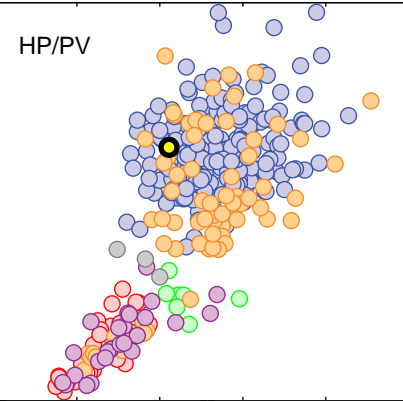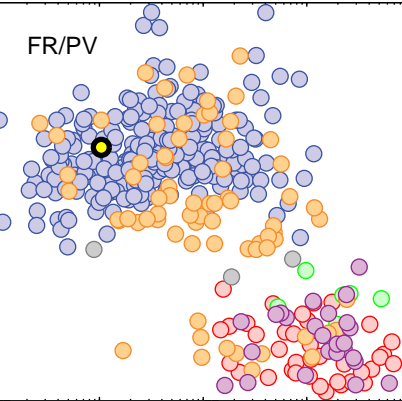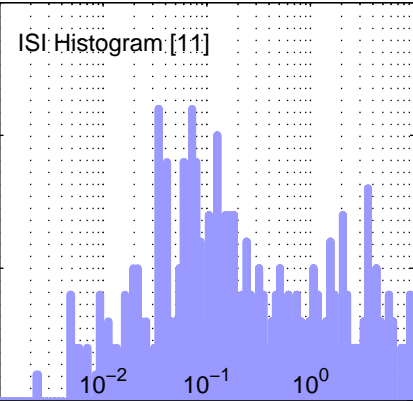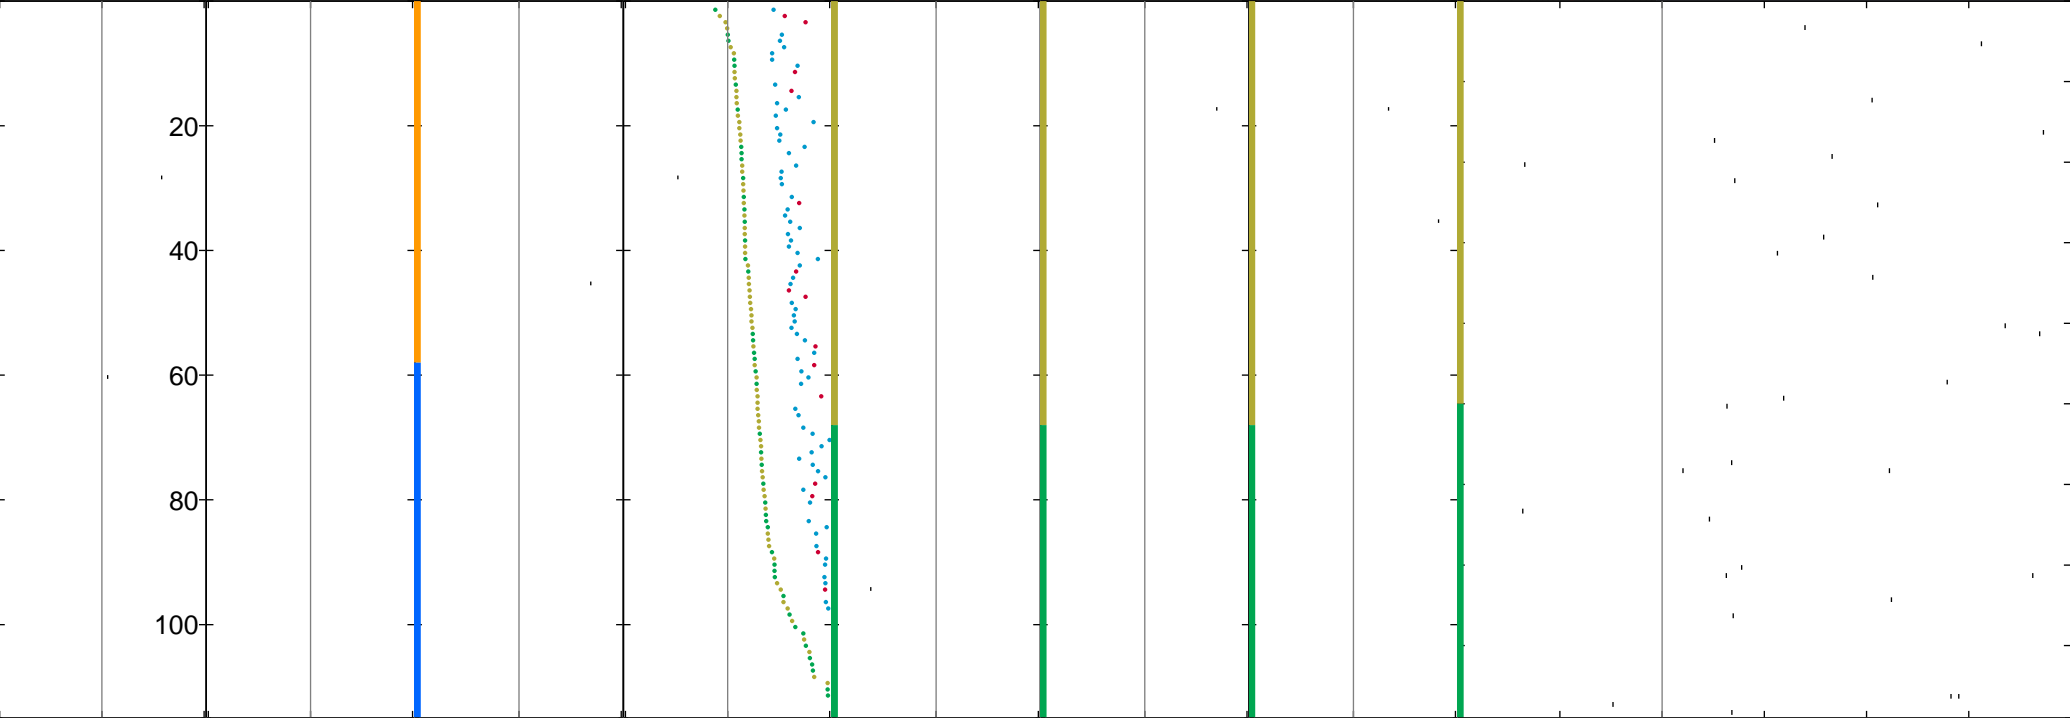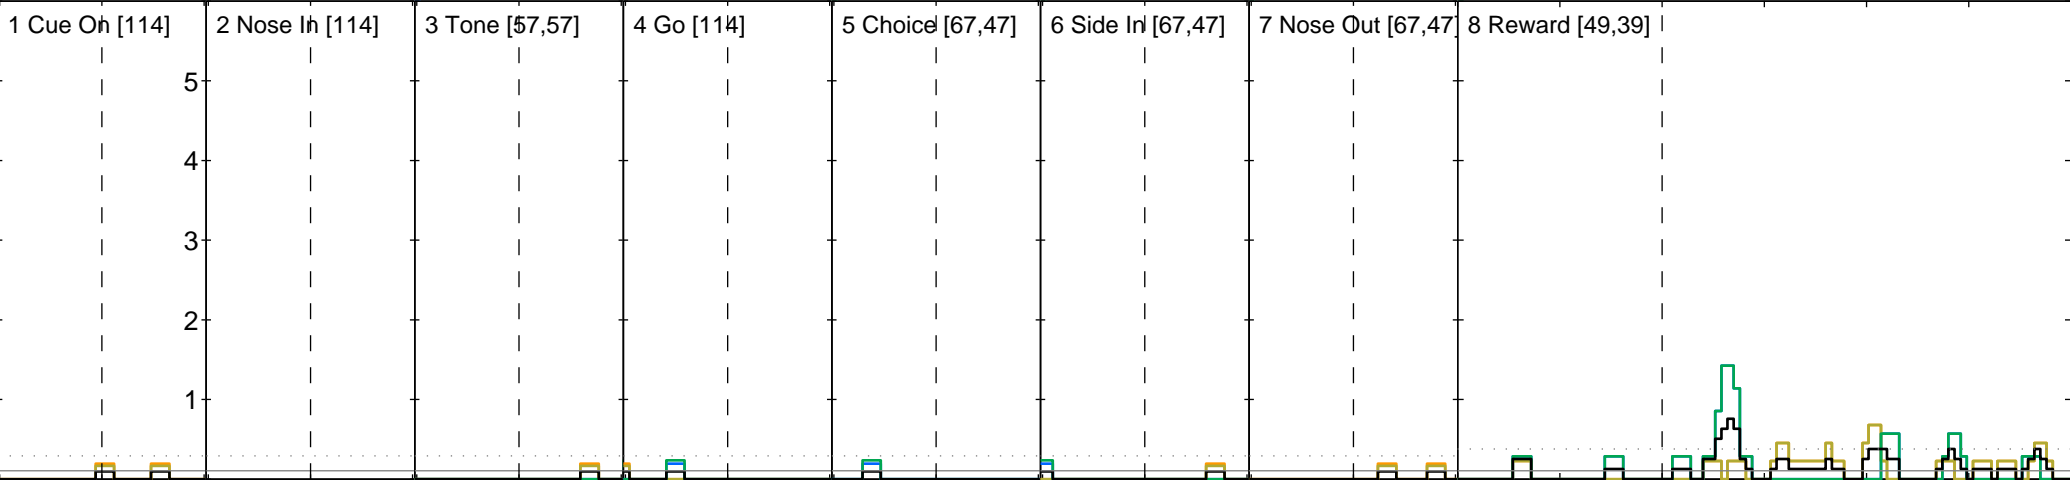

**Cell: C0320070623T07b**

AP: 0.96 ML: 3.6 DV: 6.3

w: 3 n: 1429  $P_{ISI>2}$ : 0.911/2pw: 285 $\mu$ s p $\rightarrow$ v: 821 $\mu$ s $\beta_T$ : -0.48  $\beta_D$ : -2.2 $\beta_P$ : 3.6 SI: NaN

Session FR: 0.377 Hz

Pk Ev: None

Pk FR: --

MSN

Waveform

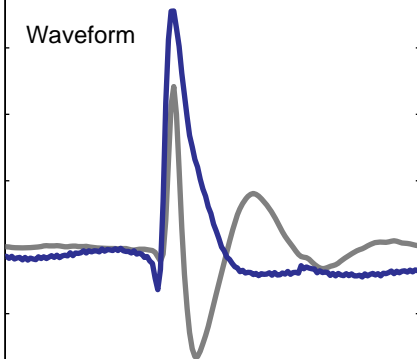

HP/PV

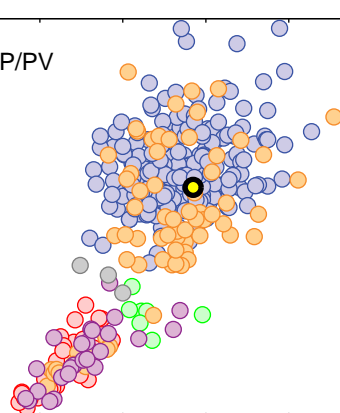

FR/PV

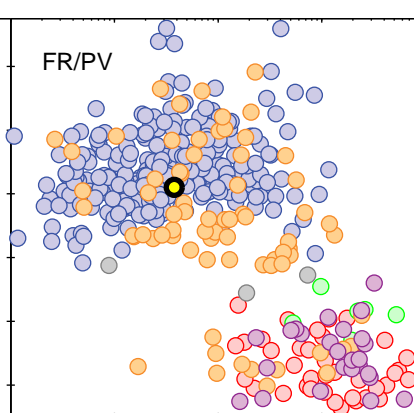

ISI Histogram [35]

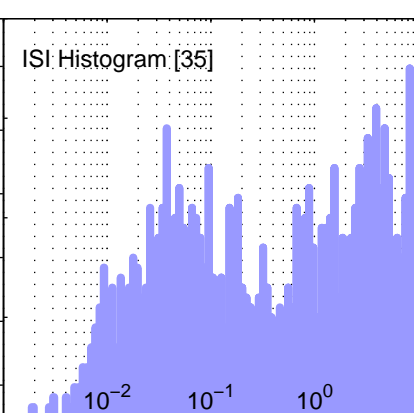10  
20  
30  
40  
50  
60  
70  
80  
90  
100

1 Cue On [102]

2 Nose In [102]

3 Tone [52,50]

4 Go [102]

5 Choice [55,47]

6 Side In [55,47]

7 Nose Out [55,47]

8 Reward [39,34]

5  
4  
3  
2  
1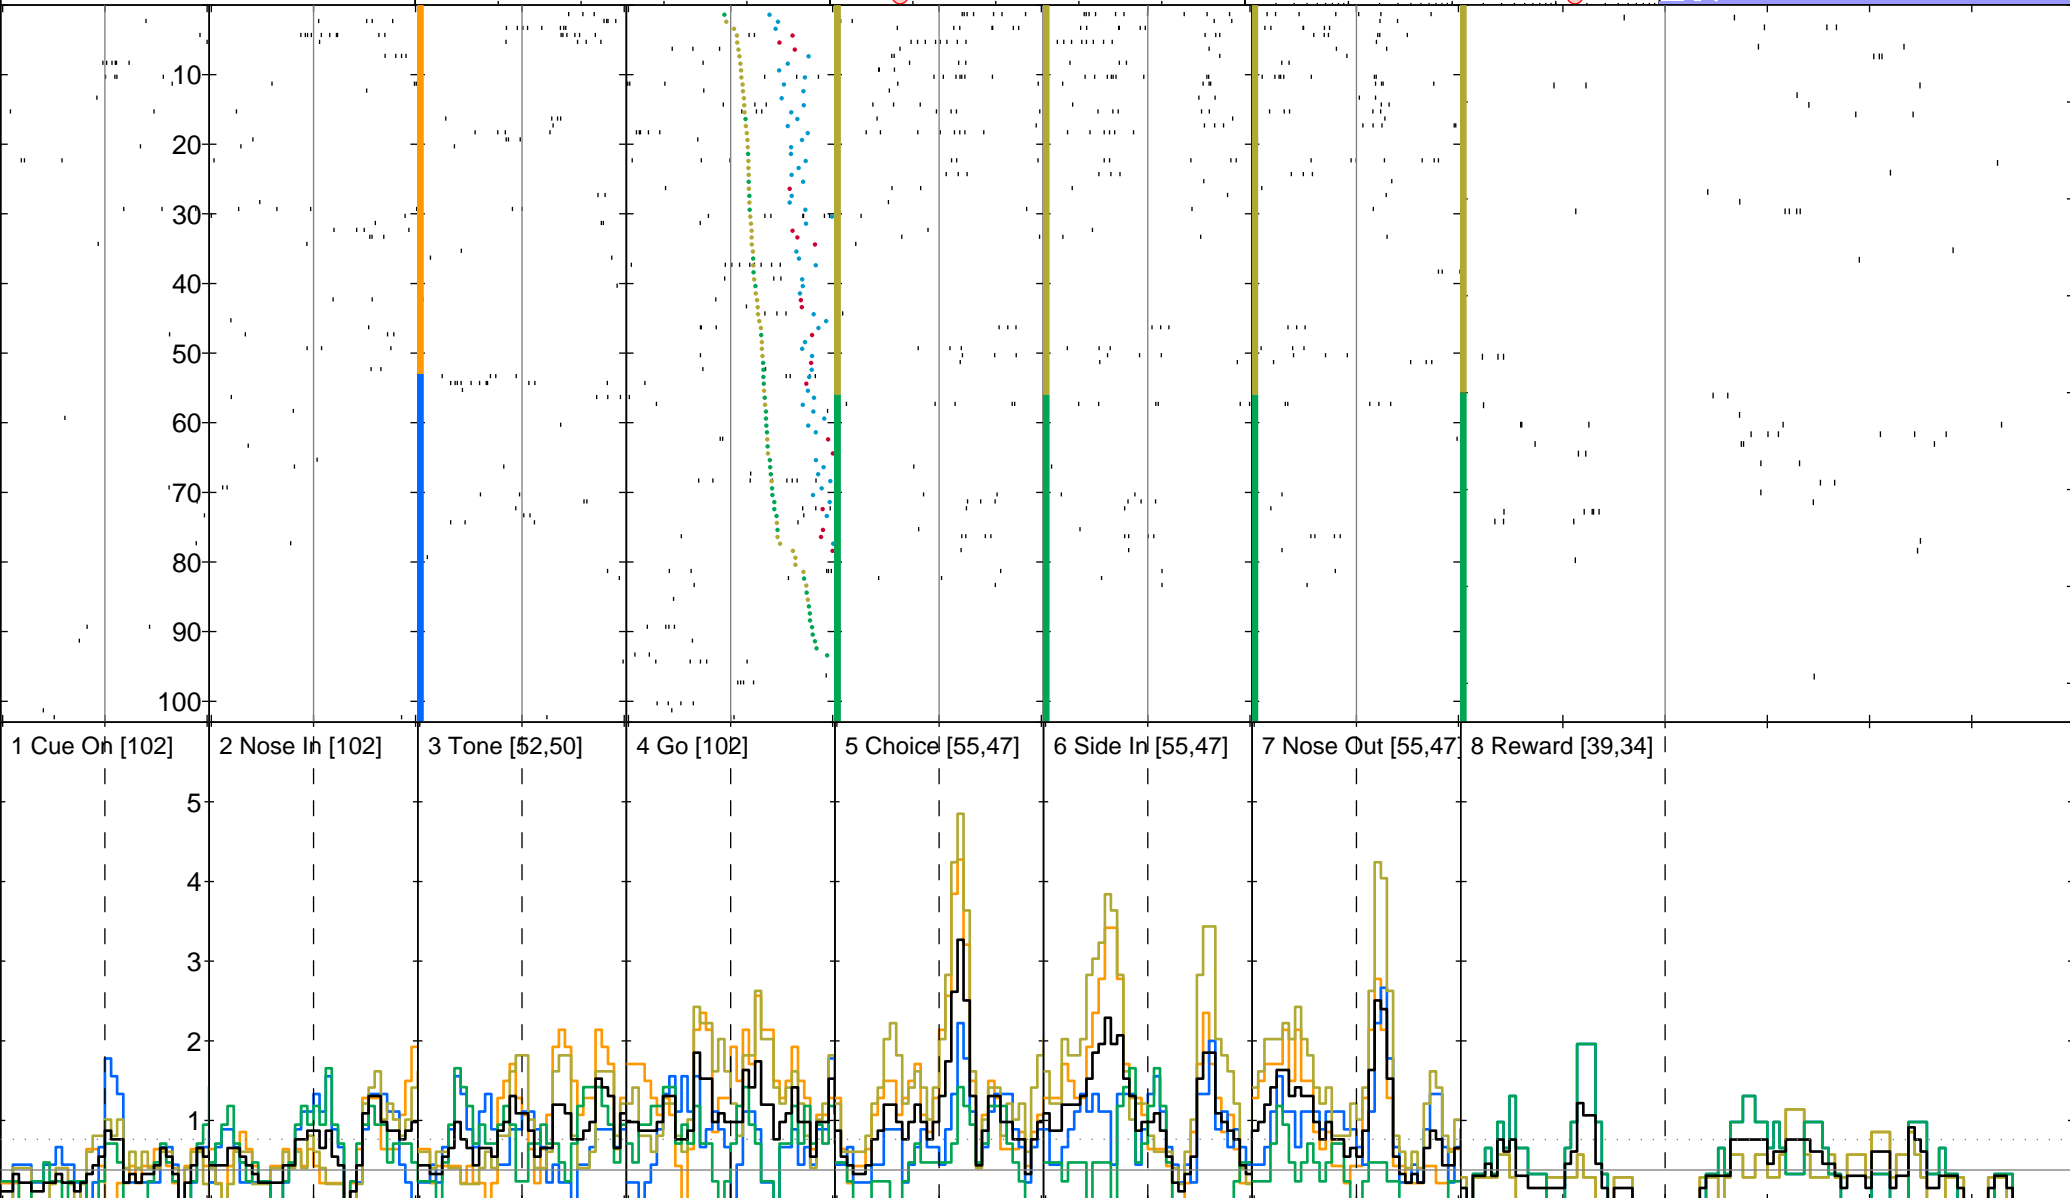

**Cell: C0320070623T07c**

AP: 0.96 ML: 3.6 DV: 6.3  
w: 4 n: 1372  $P_{ISI>2}$ : 0.91  
1/2pw: 278 $\mu$ s p->v: 1003 $\mu$ s  
 $\beta_T$ : NaN  $\beta_D$ : NaN  
 $\beta_P$ : NaN SI: NaN  
Session FR: 0.365 Hz  
Pk Ev: None  
Pk FR: --

MSN

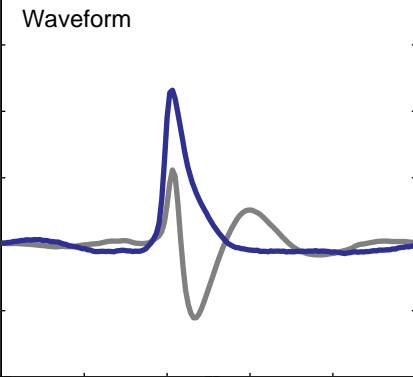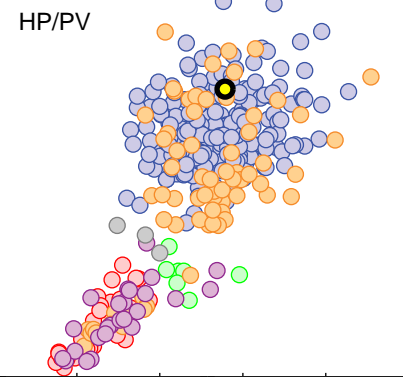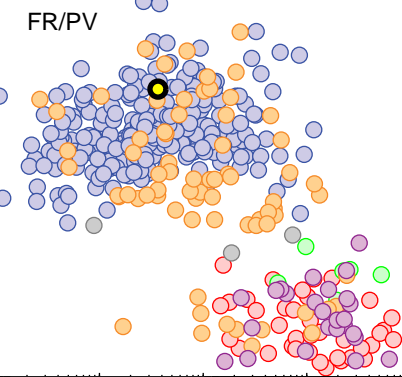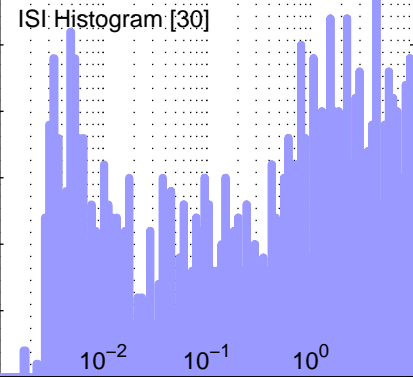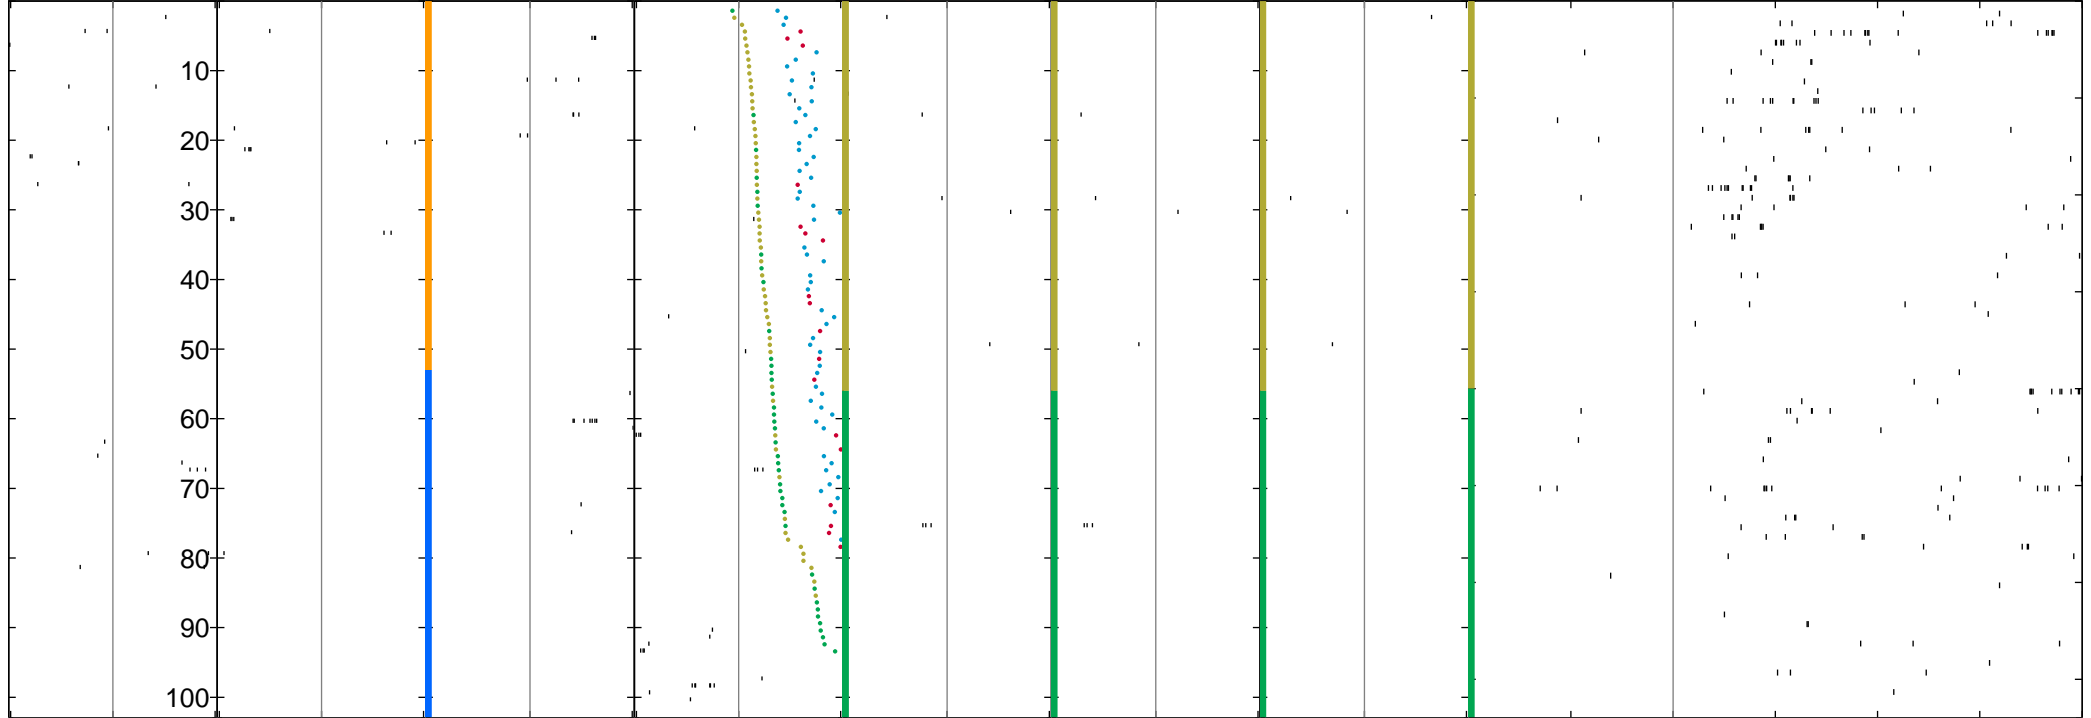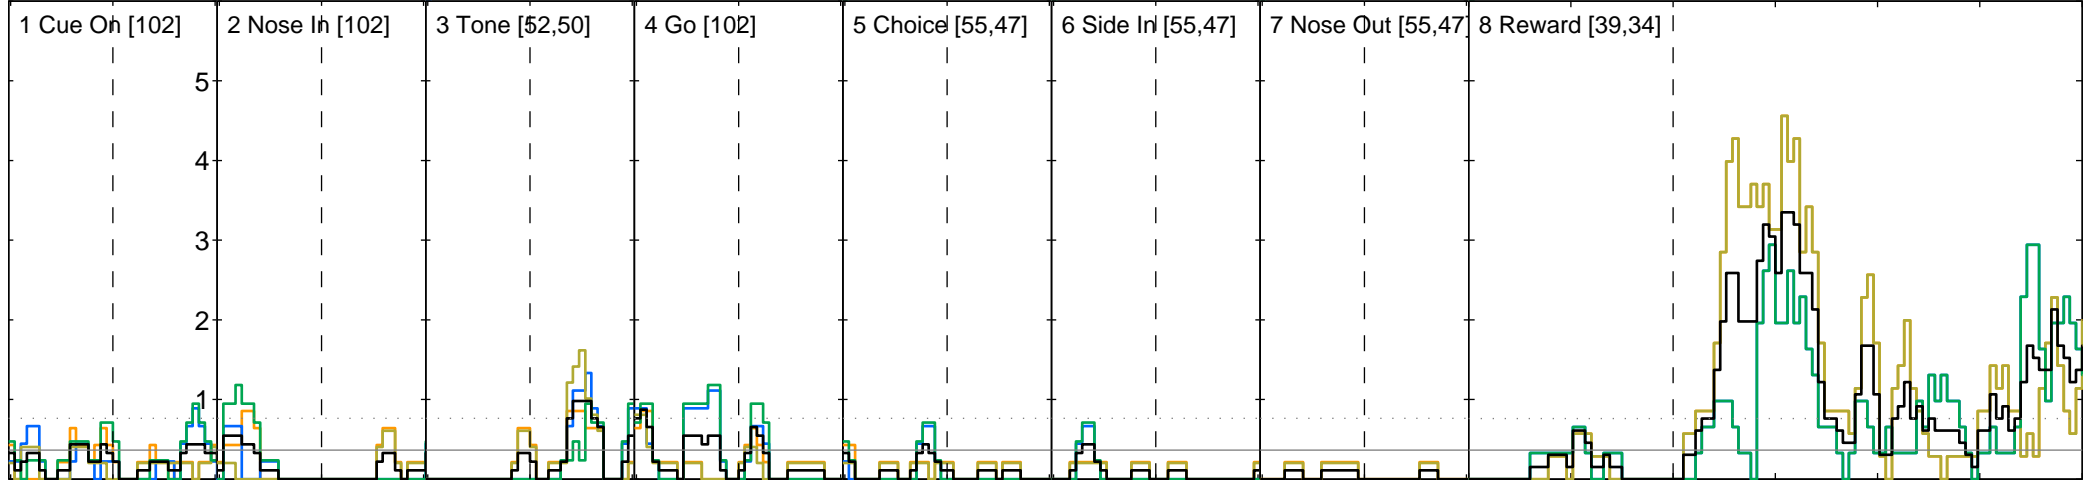

**Cell: C0320070623T09a**

AP: 1.6 ML: 3.7 DV: 5.3  
w: 1 n: 907  $P_{ISI>2}$ : 0.92  
1/2pw: 253 $\mu$ s p->v: 856 $\mu$ s  
 $\beta_T$ : NaN  $\beta_D$ : NaN  
 $\beta_P$ : NaN SI: NaN  
Session FR: 0.24 Hz  
Pk Ev: None  
Pk FR: --

MSN

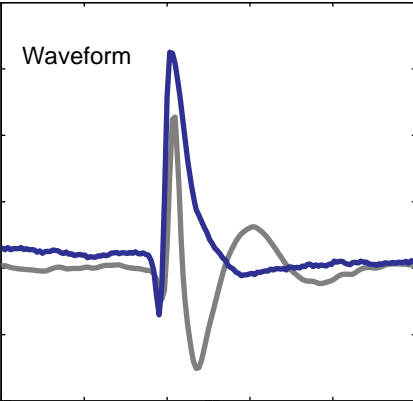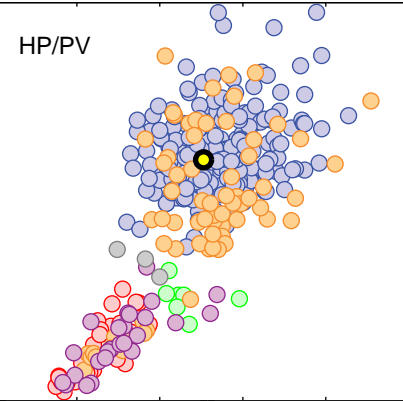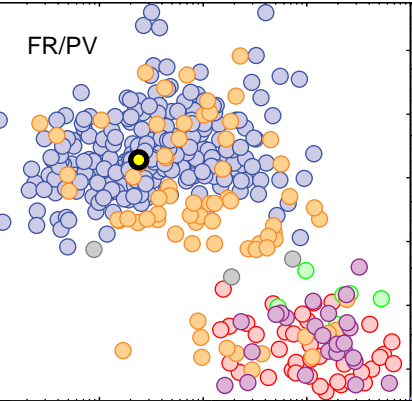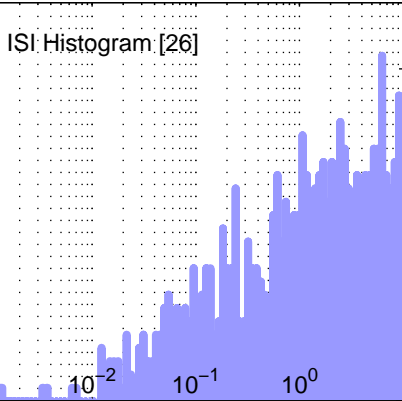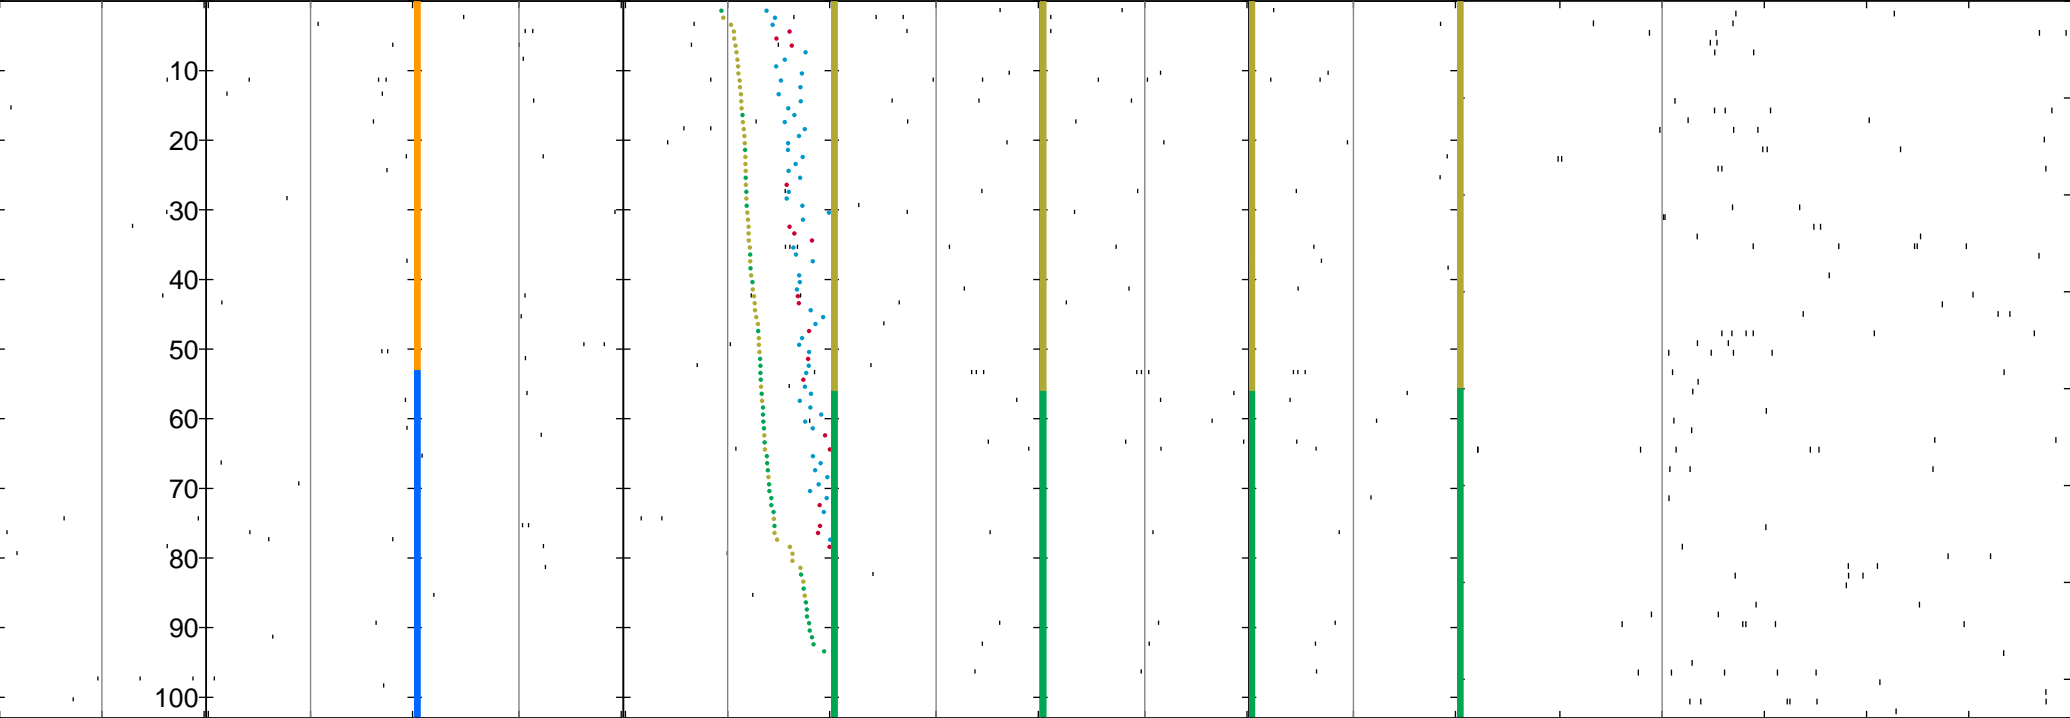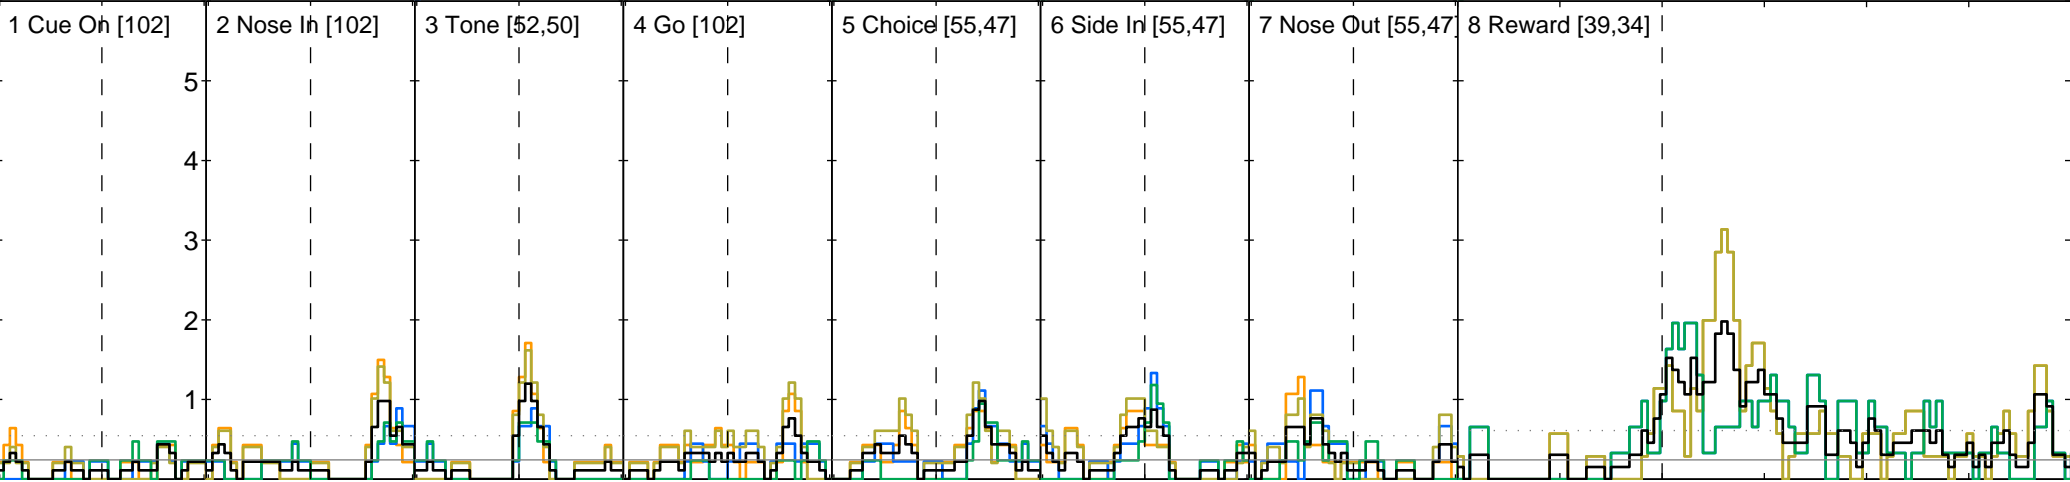



**Cell: C0320070623T09b**

AP: 1.6 ML: 3.7 DV: 5.3

w: 1 n: 840  $P_{ISI>2}$ : 0.951/2pw: 214 $\mu$ s p $\rightarrow$ v: 1013 $\mu$ s $\beta_T$ : NaN  $\beta_D$ : NaN $\beta_P$ : NaN SI: NaN

Session FR: 0.222 Hz

Pk Ev: None

Pk FR: --

MSN

Waveform

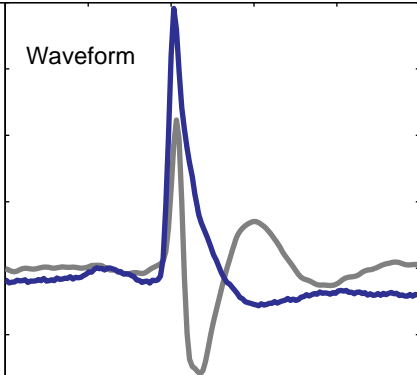

HP/PV

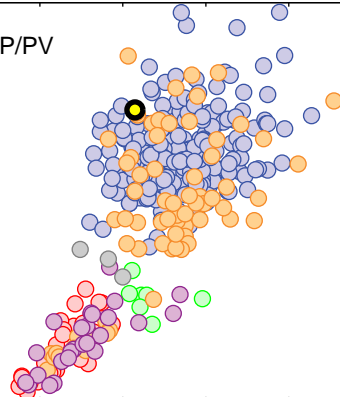

FR/PV

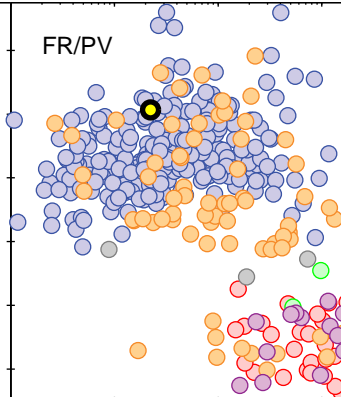

ISI Histogram [21]

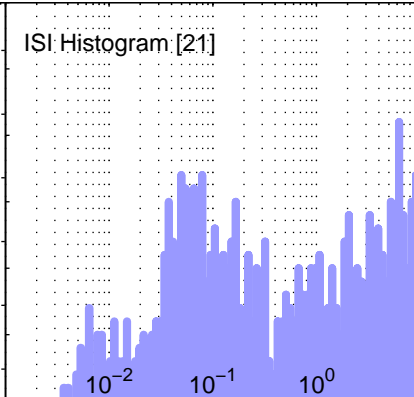10  
20  
30  
40  
50  
60  
70  
80  
90  
100

1 Cue On [102]

2 Nose In [102]

3 Tone [52,50]

4 Go [102]

5 Choice [55,47]

6 Side In [55,47]

7 Nose Out [55,47]

8 Reward [39,34]

5  
4  
3  
2  
1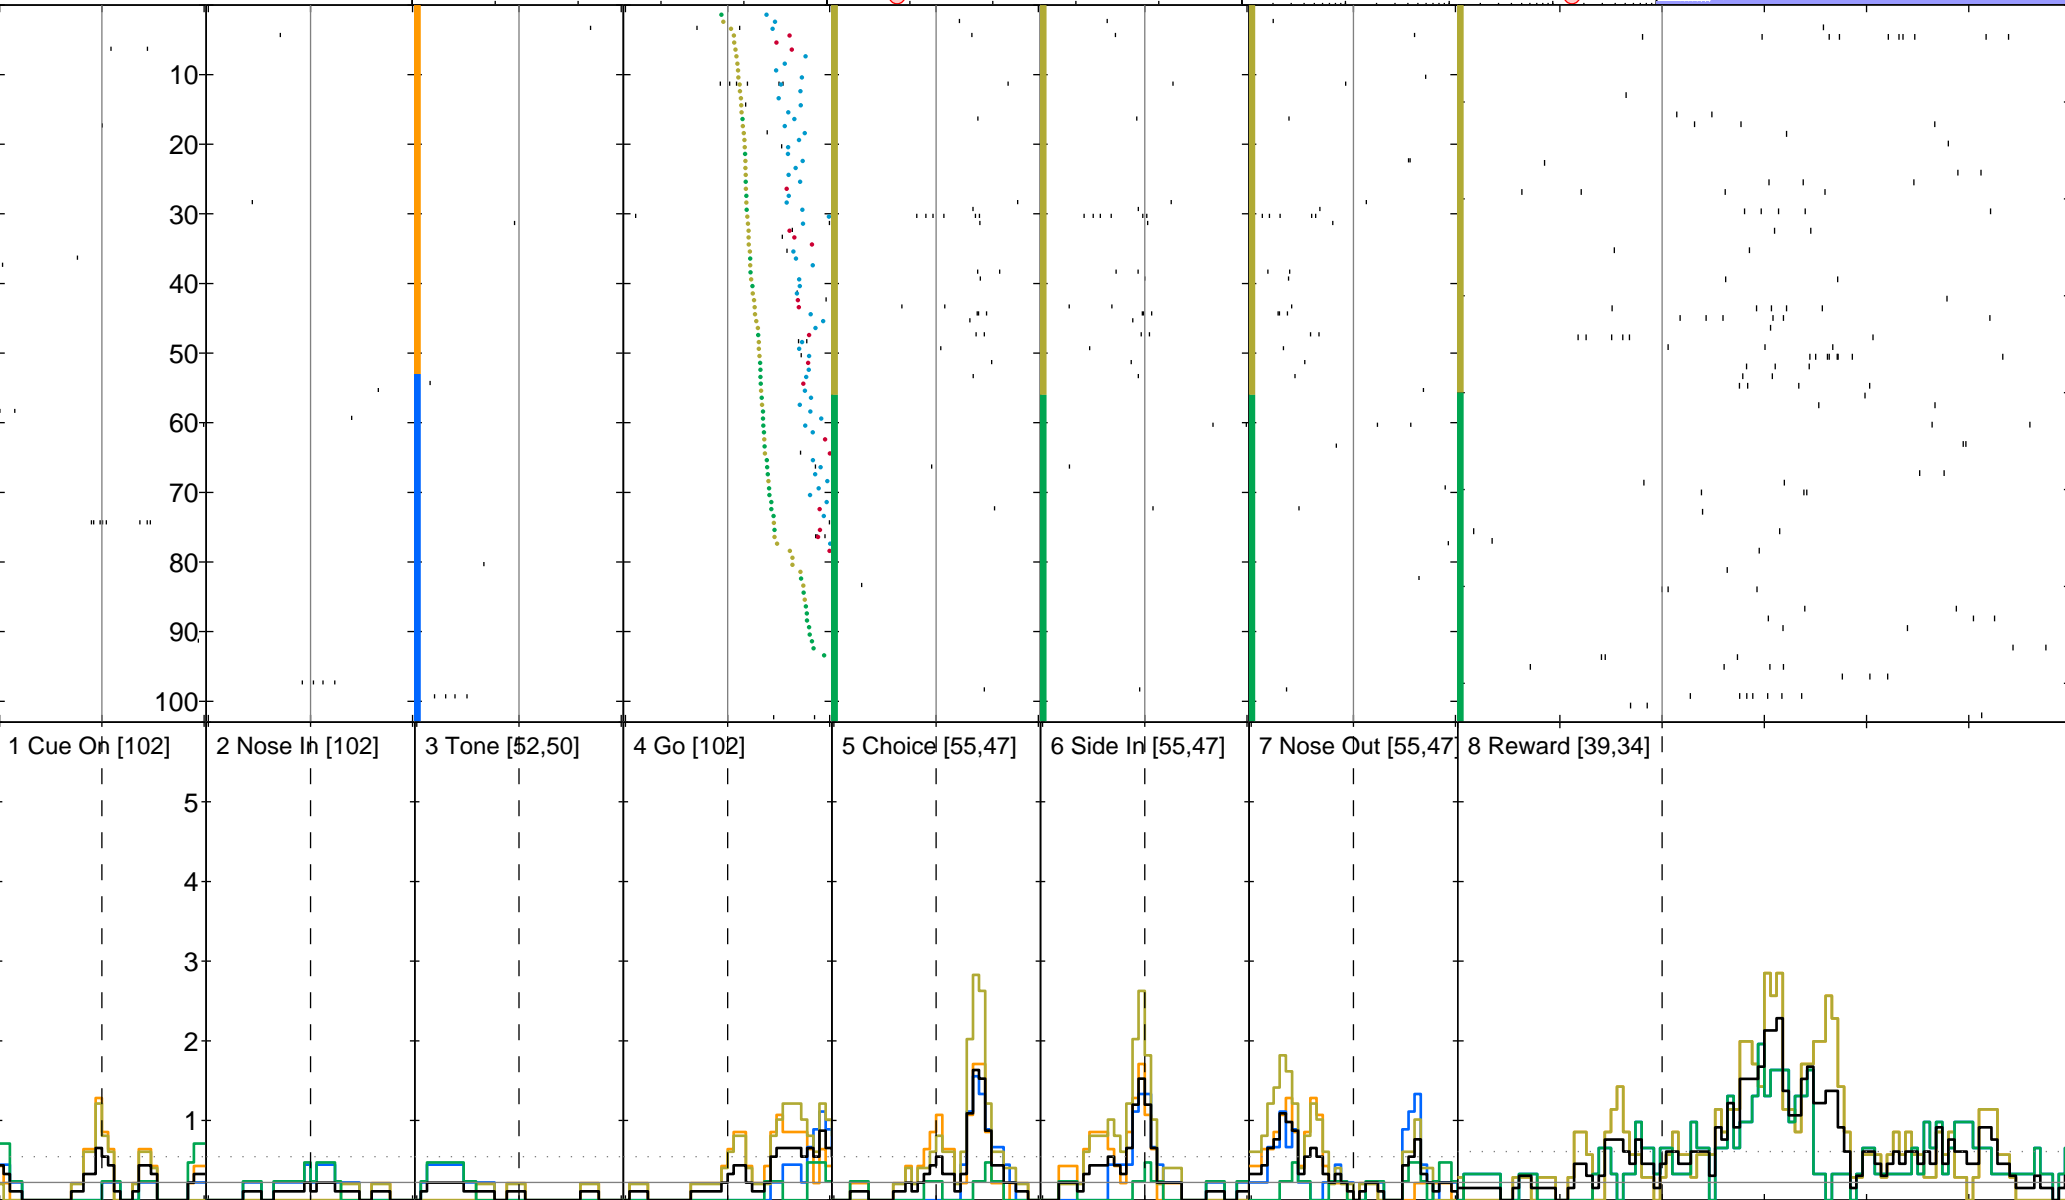

**Cell: C0320070623T09F**

AP: 1.6 ML: 3.7 DV: 5.3  
w: 3 n: 473  $P_{ISI>2}$ : 0.98  
1/2pw: 222 $\mu$ s p->v: 754 $\mu$ s  
 $\beta_T$ : NaN  $\beta_D$ : NaN  
 $\beta_P$ : NaN SI: NaN  
Session FR: 0.125 Hz  
Pk Ev: None  
Pk FR: --

MSN

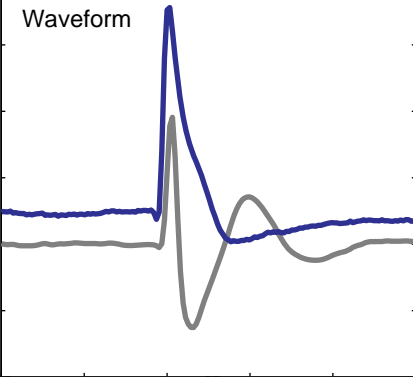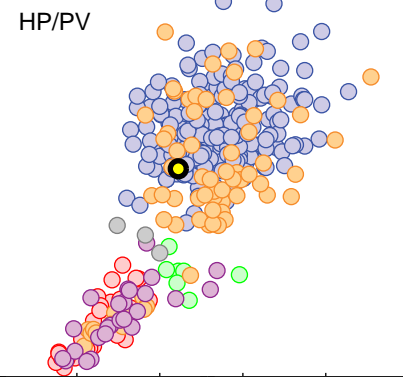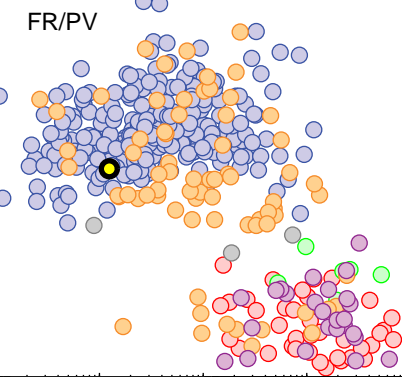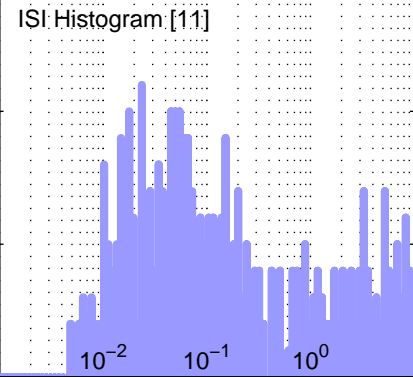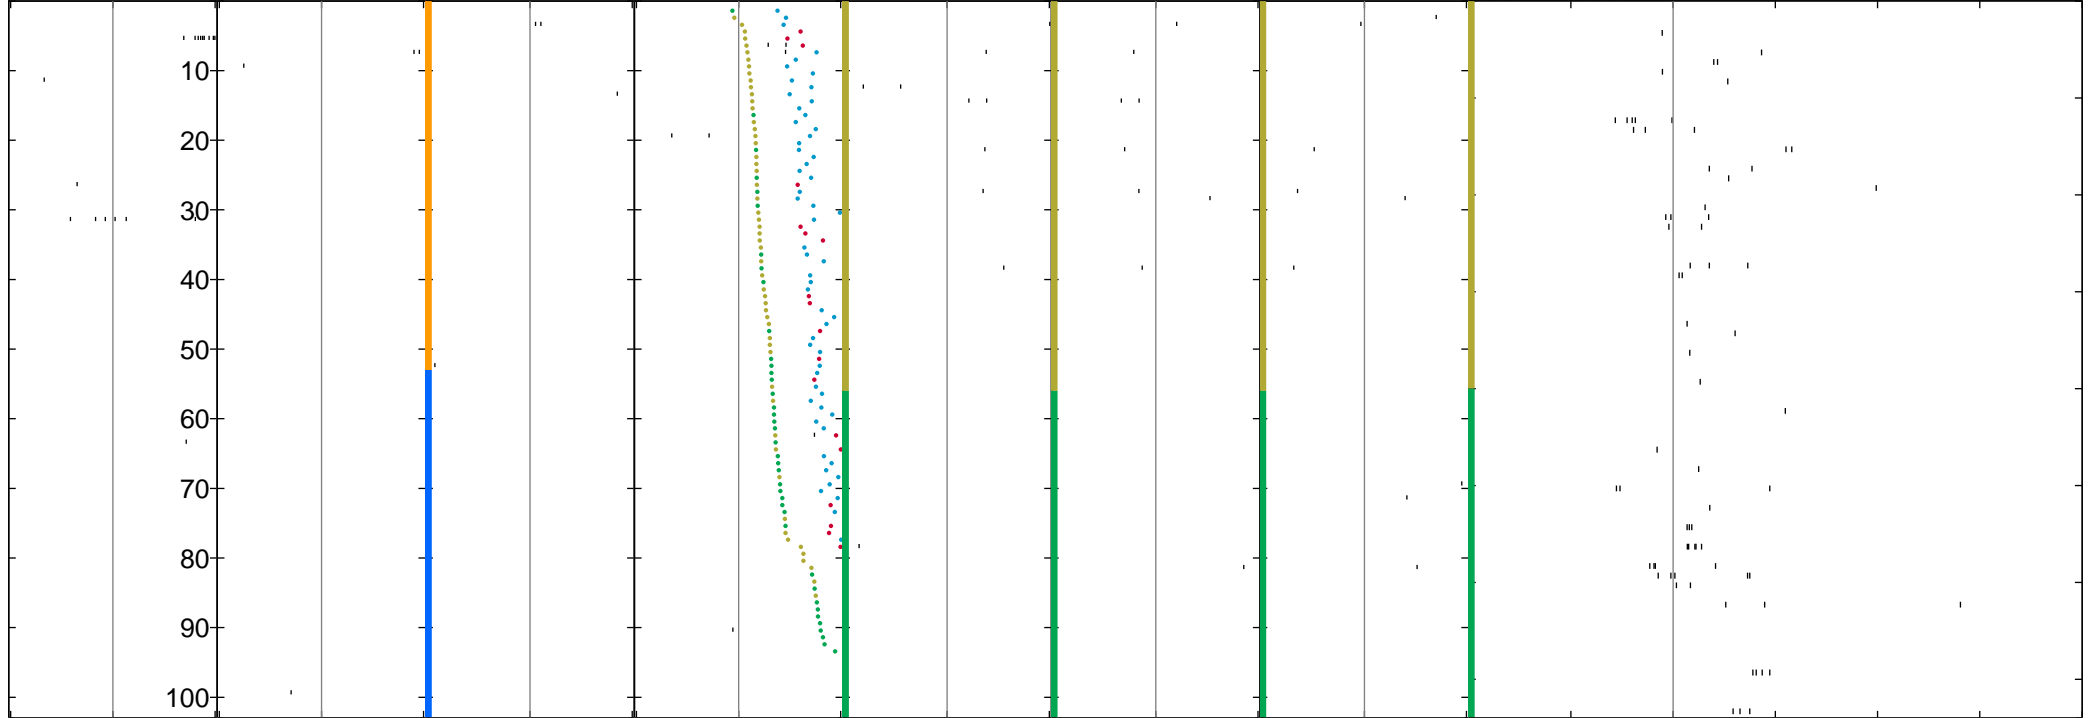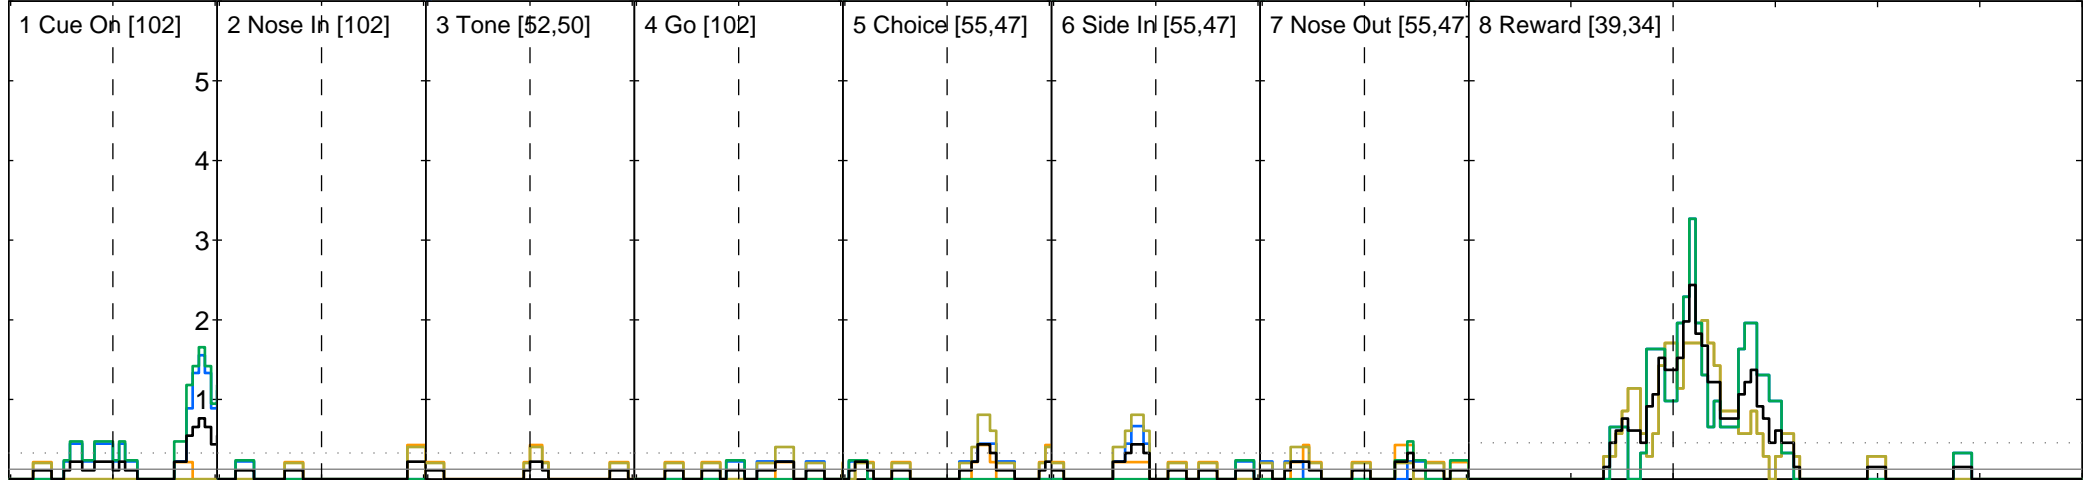

**Cell: C0320070623T09g**

AP: 1.6 ML: 3.7 DV: 5.3  
w: 3 n: 183  $P_{ISI>2}$ : 0.99  
1/2pw: 269 $\mu$ s p->v: 675 $\mu$ s  
 $\beta_T$ : NaN  $\beta_D$ : NaN  
 $\beta_P$ : NaN SI: NaN  
Session FR: 0.0482 Hz  
Pk Ev: None  
Pk FR: --

MSN

Waveform

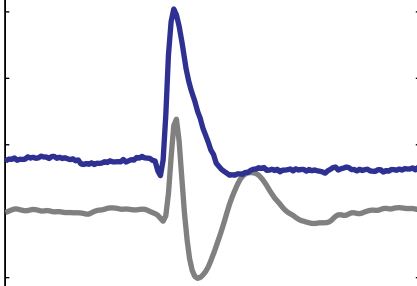

HP/PV

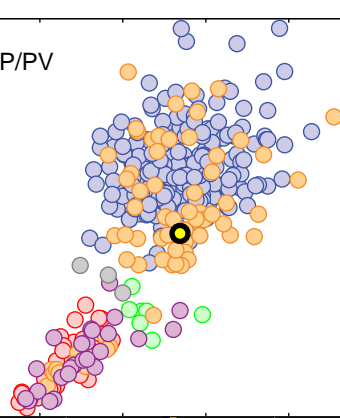

FR/PV

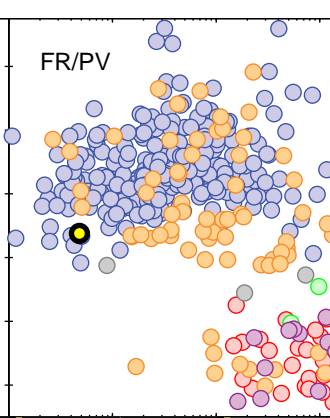

ISI Histogram [7]

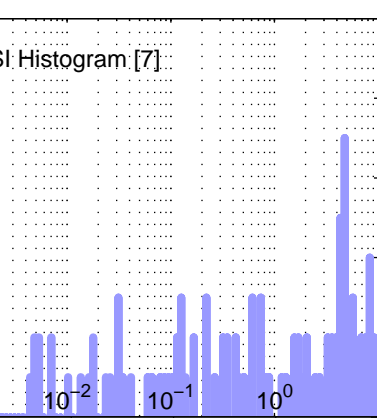

10  
20  
30  
40  
50  
60  
70  
80  
90  
100

1 Cue On [102]

2 Nose In [102]

3 Tone [52,50]

4 Go [102]

5 Choice [55,47]

6 Side In [55,47]

7 Nose Out [55,47]

8 Reward [39,34]

5  
4  
3  
2  
1

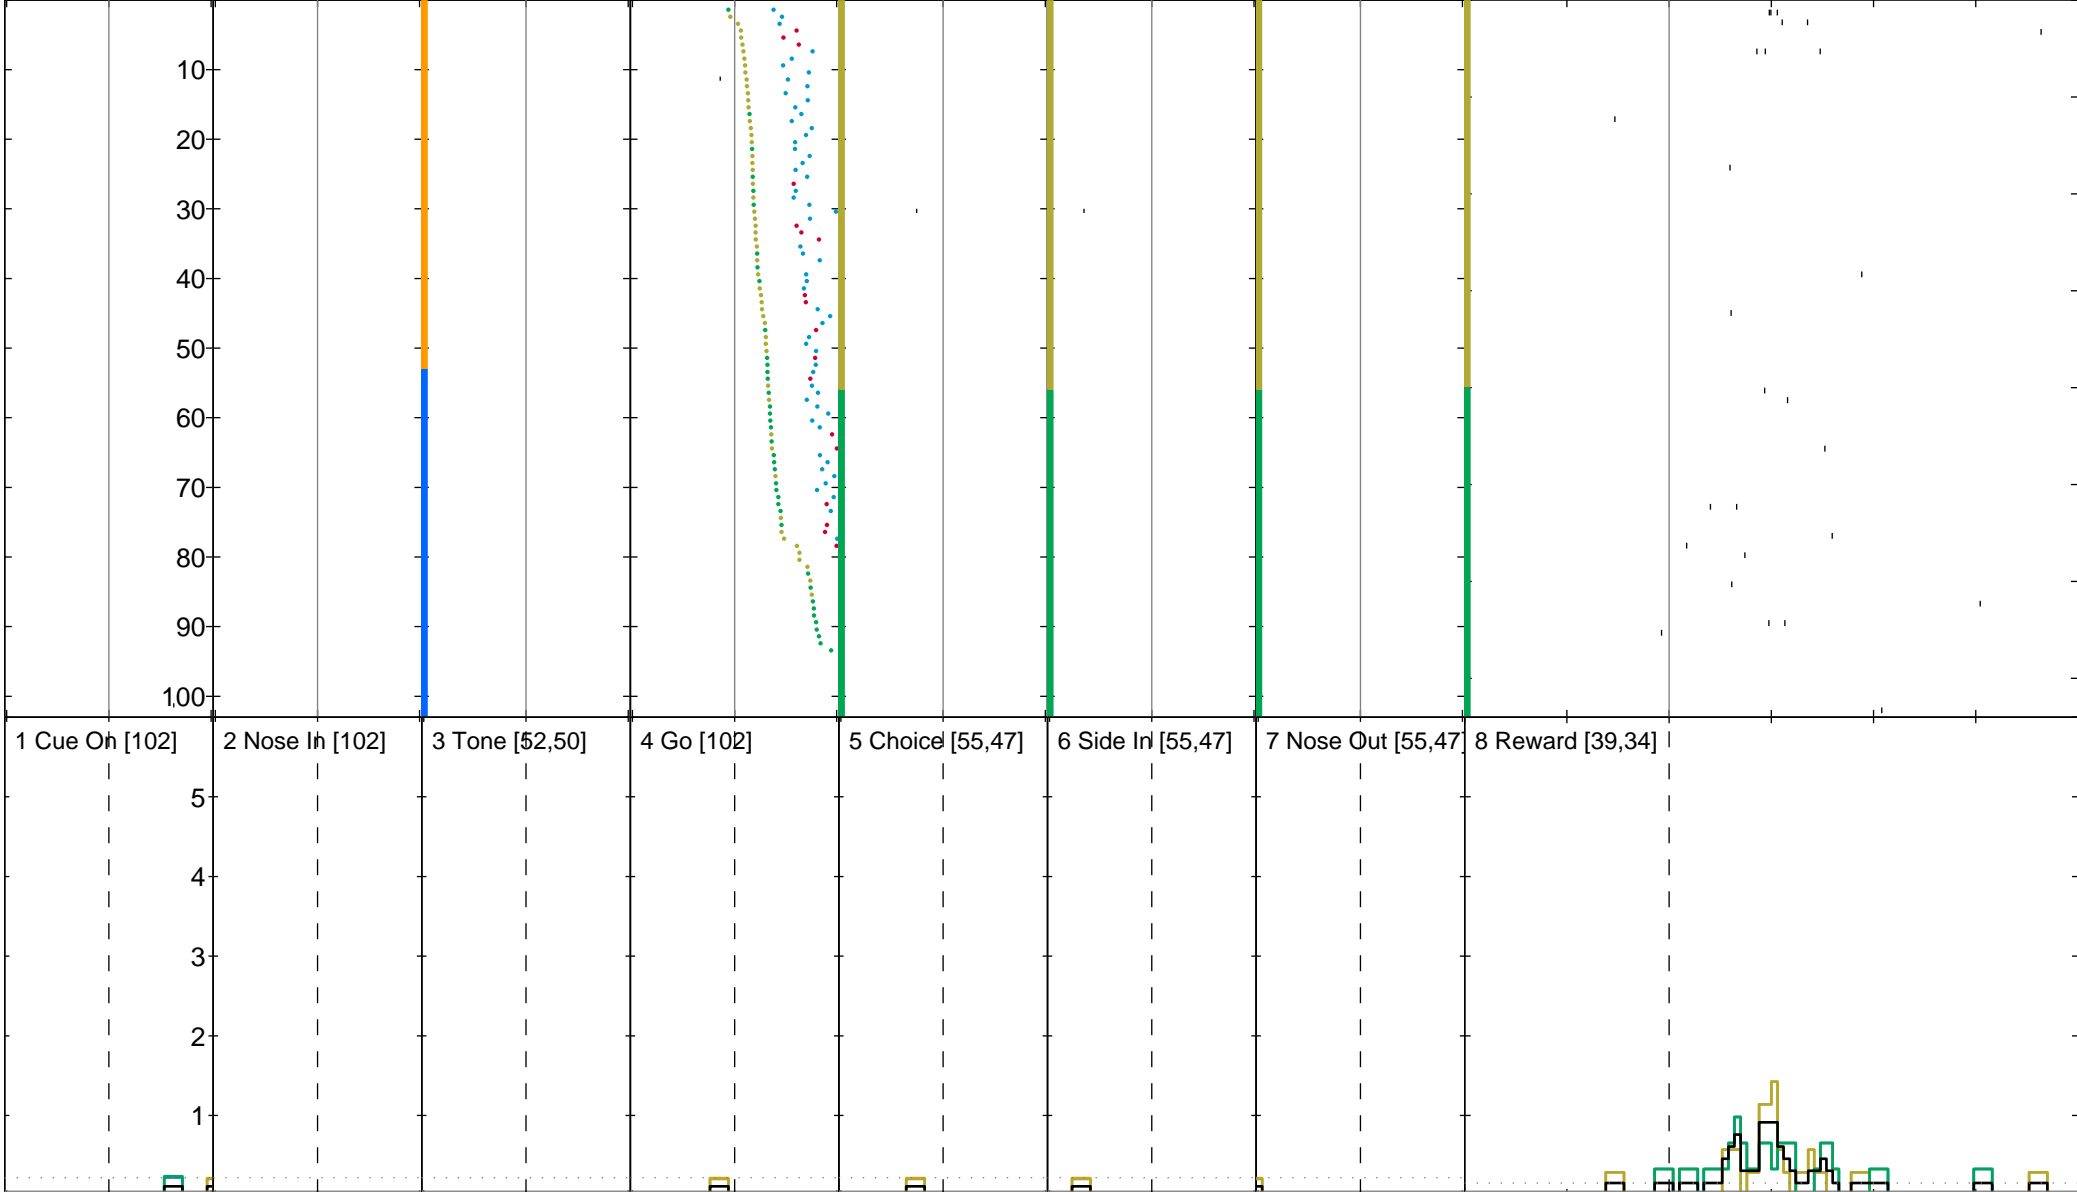

**Cell: C0320070623T09h**

AP: 1.6 ML: 3.7 DV: 5.3  
w: 4 n: 756  $P_{ISI>2}$ : 0.96  
1/2pw: 322 $\mu$ s p->v: 974 $\mu$ s  
 $\beta_T$ : NaN  $\beta_D$ : NaN  
 $\beta_P$ : NaN SI: NaN  
Session FR: 0.199 Hz  
Pk Ev: None  
Pk FR: --

**MSN**

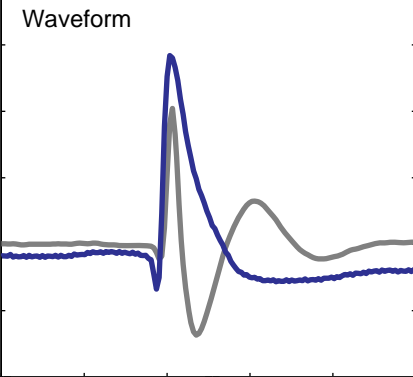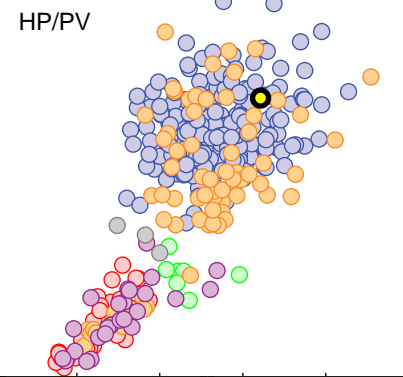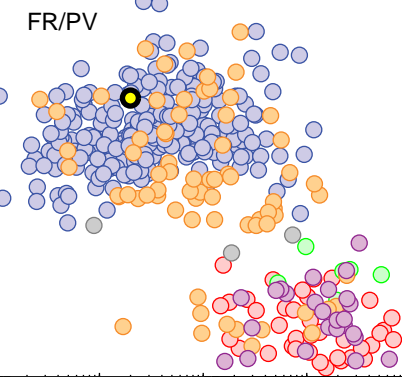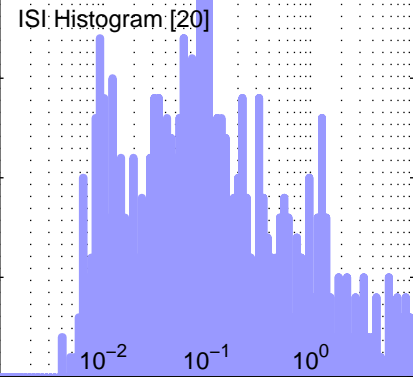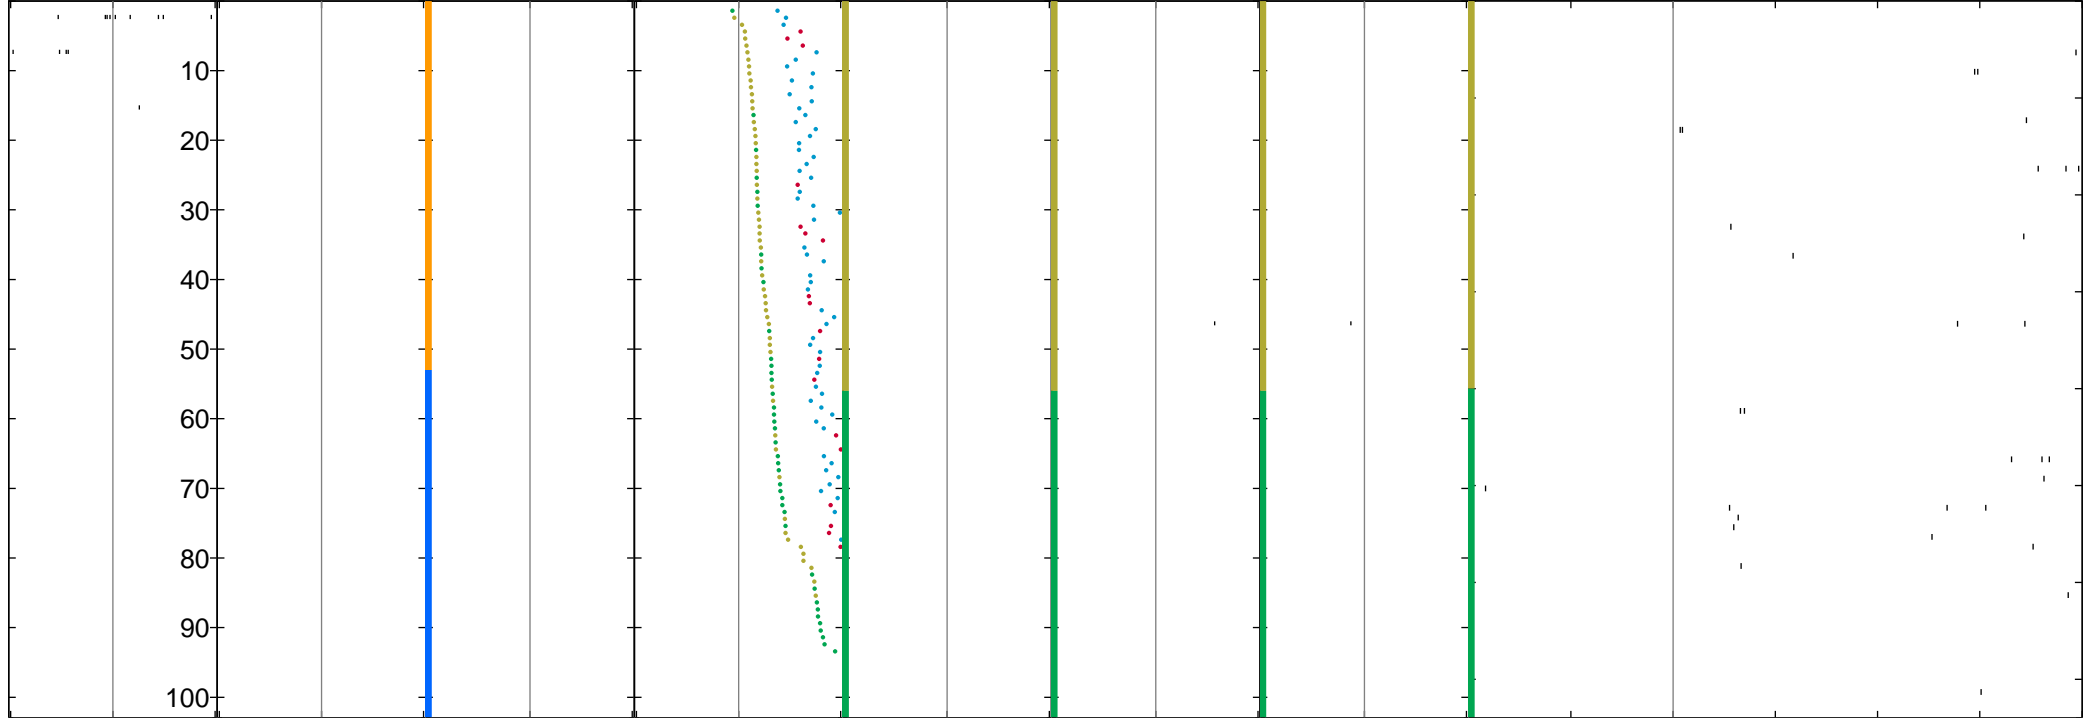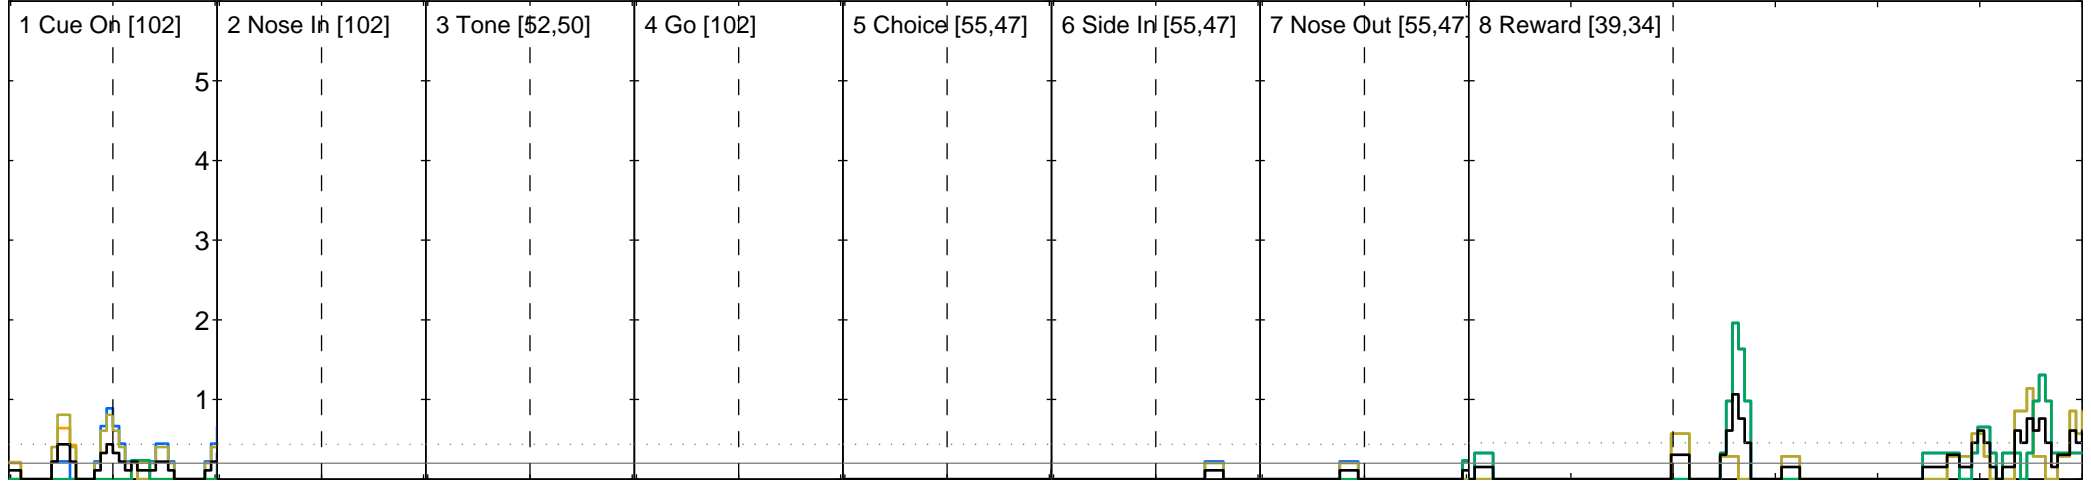

**Cell: C0320070623T11c**

AP: -0.96 ML: 3.7 DV: 5.9

w: 2 n: 552  $P_{ISI>2}$ : 0.96

1/2pw: 328 $\mu$ s p->v: 757 $\mu$ s

$\beta_T$ : NaN  $\beta_D$ : NaN

$\beta_P$ : NaN SI: NaN

Session FR: 0.146 Hz

Pk Ev: None

Pk FR: --

MSN

Waveform

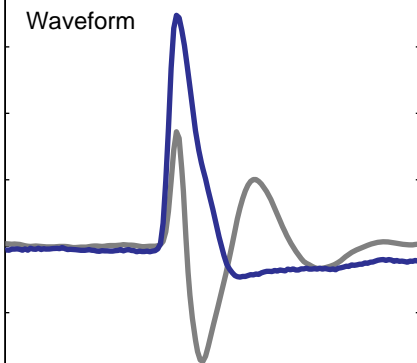

HP/PV

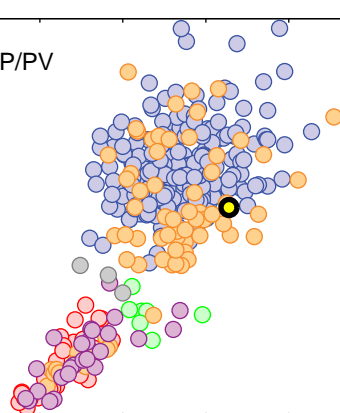

FR/PV

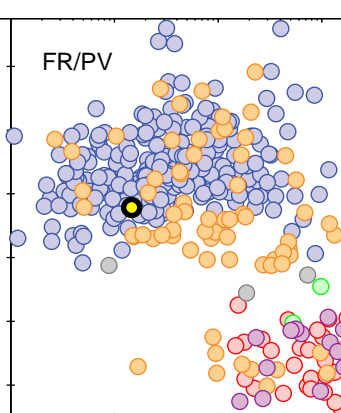

ISI Histogram [15]

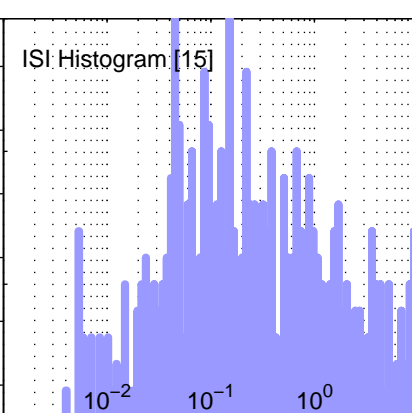

10  
20  
30  
40  
50  
60  
70  
80  
90  
100

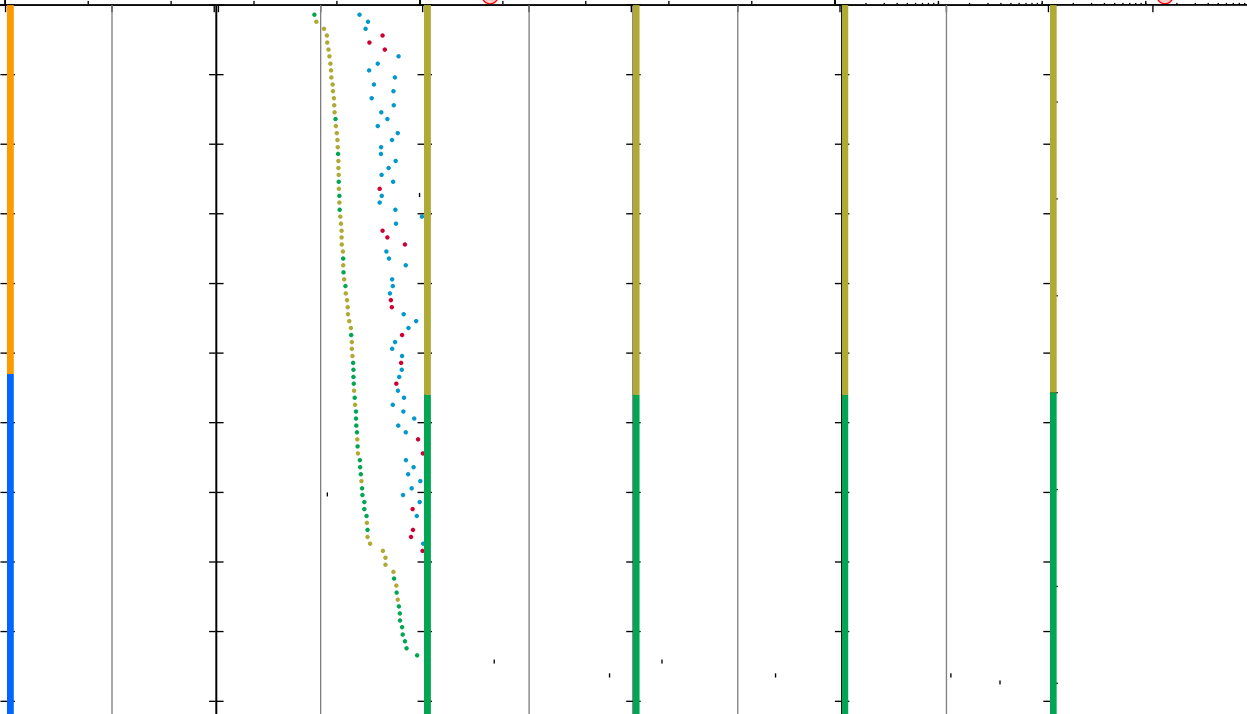

1 Cue On [102] 2 Nose In [102] 3 Tone [52,50] 4 Go [102] 5 Choice [55,47] 6 Side In [55,47] 7 Nose Out [55,47] 8 Reward [39,34]

5  
4  
3  
2  
1

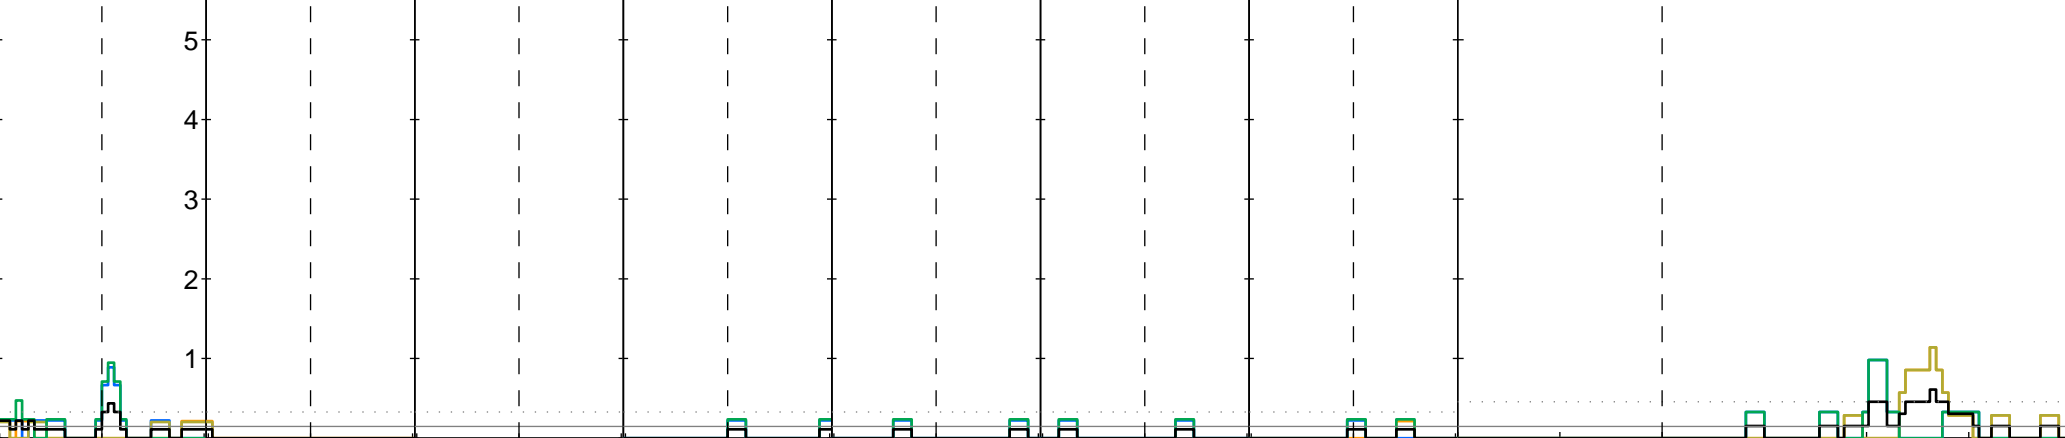

**Cell: C0320070623T11d**

AP: -0.96 ML: 3.7 DV: 5.9  
w: 2 n: 676  $P_{ISI>2}$ : 0.97  
1/2pw: 256 $\mu$ s p->v: 851 $\mu$ s  
 $\beta_T$ : NaN  $\beta_D$ : NaN  
 $\beta_P$ : NaN SI: NaN  
Session FR: 0.179 Hz  
Pk Ev: None  
Pk FR: --

**MSN**

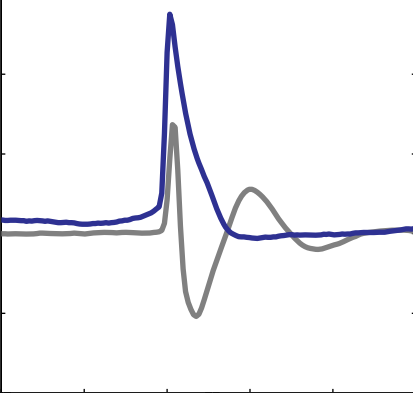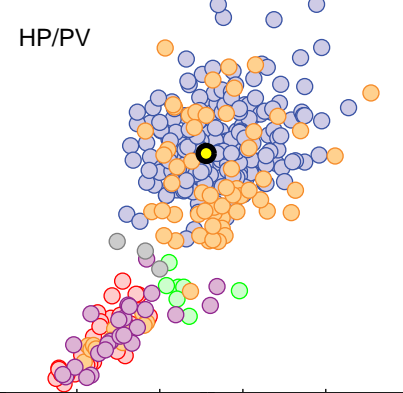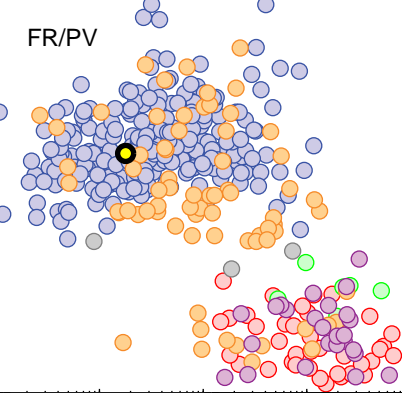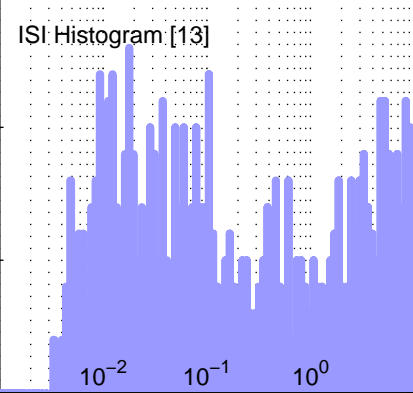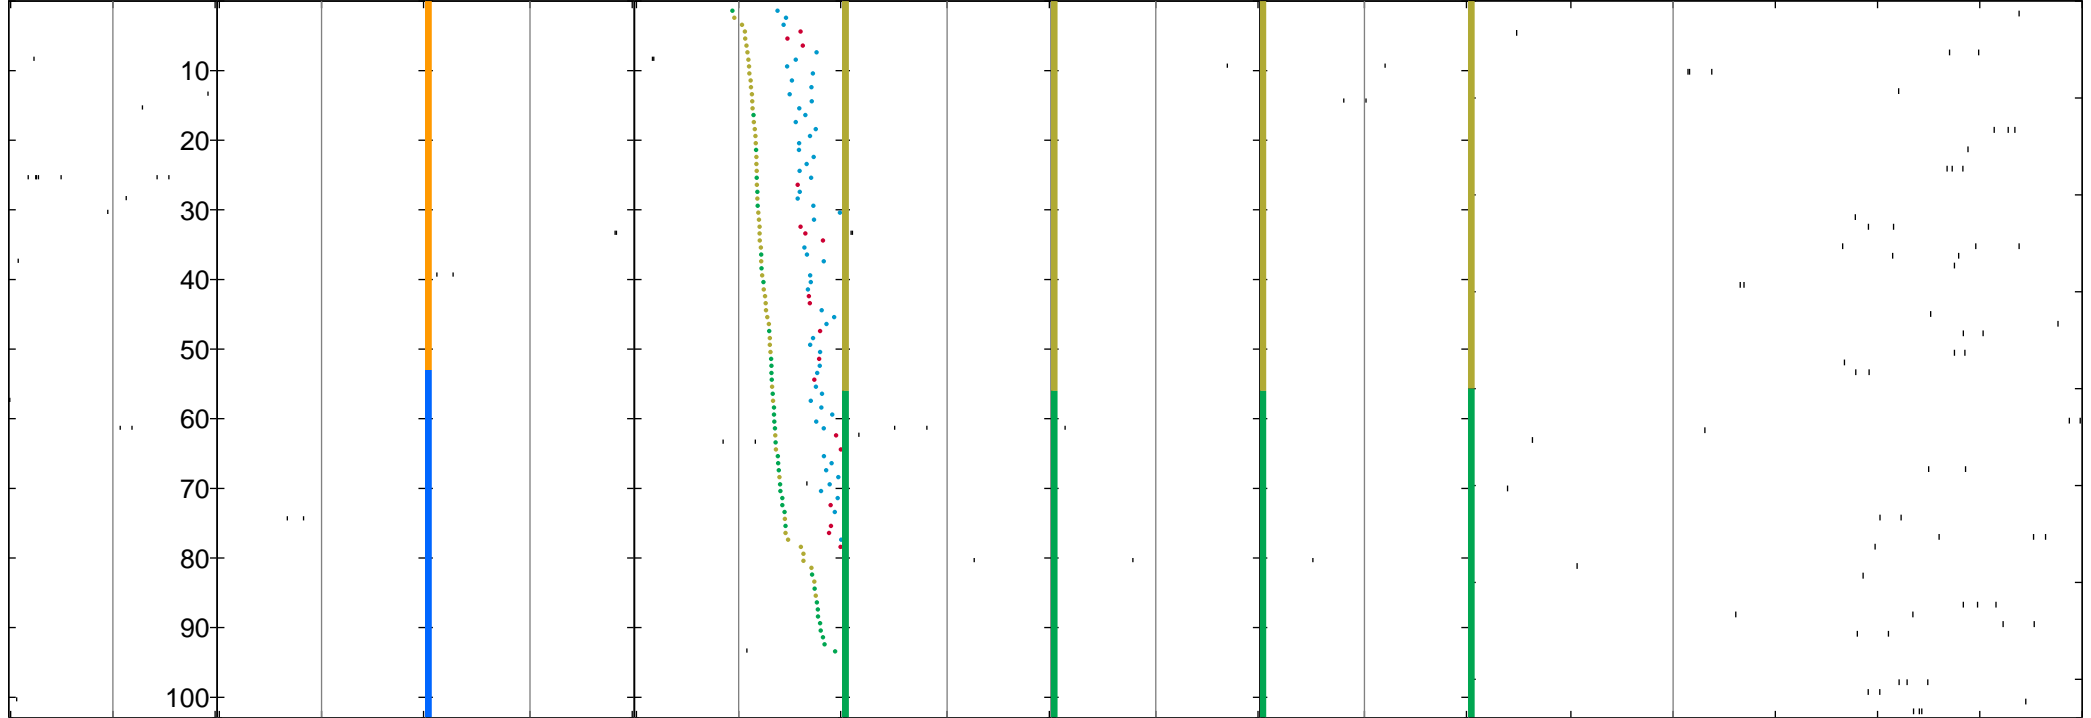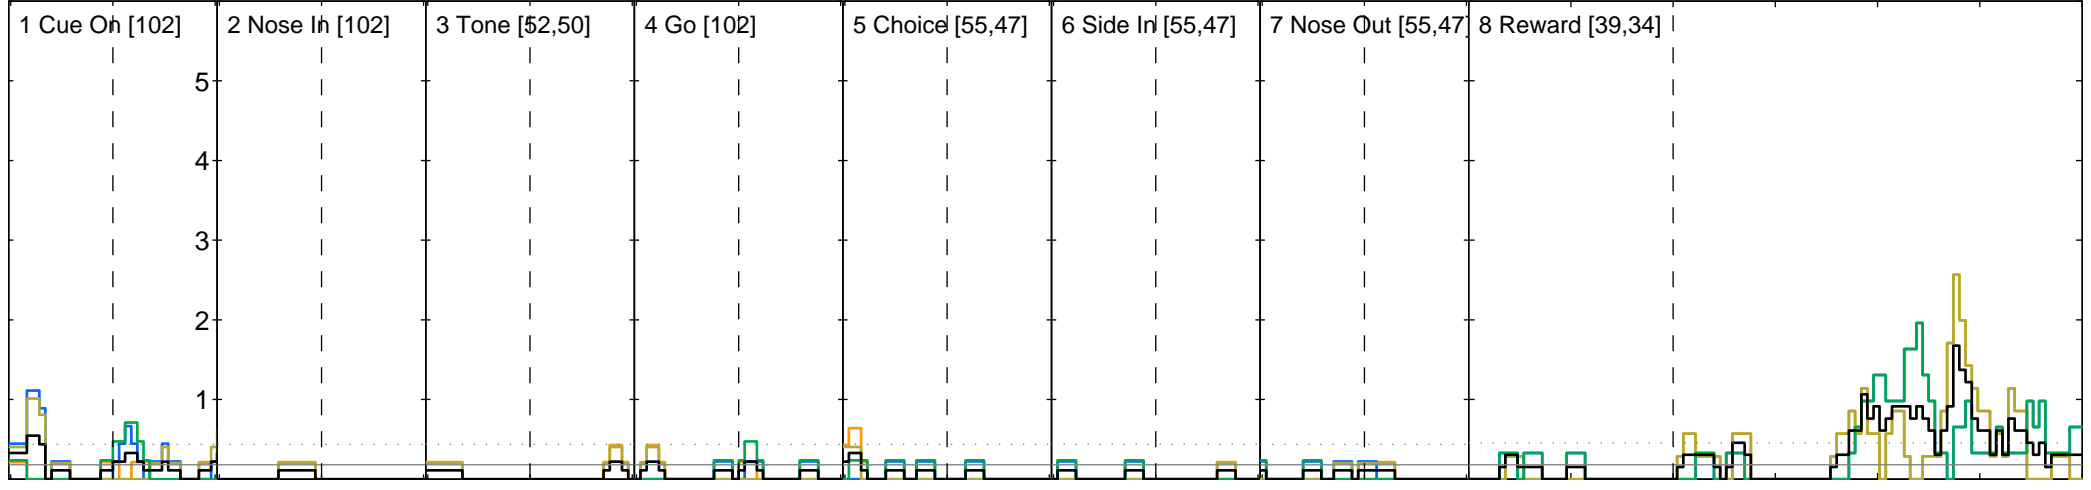

**Cell: C0320070623T11f**

AP: -0.96 ML: 3.7 DV: 5.9  
w: 1 n: 1664  $P_{ISI>2}$ : 0.88  
1/2pw: 278 $\mu$ s p->v: 757 $\mu$ s  
 $\beta_T$ : NaN  $\beta_D$ : NaN  
 $\beta_P$ : NaN SI: NaN  
Session FR: 0.438 Hz  
Pk Ev: None  
Pk FR: --

MSN

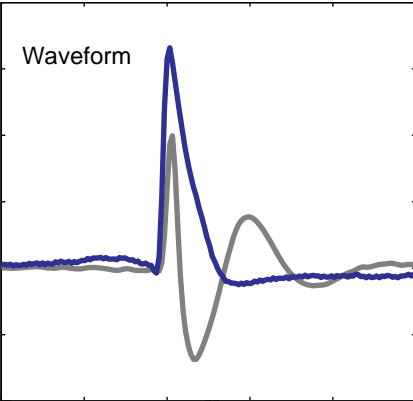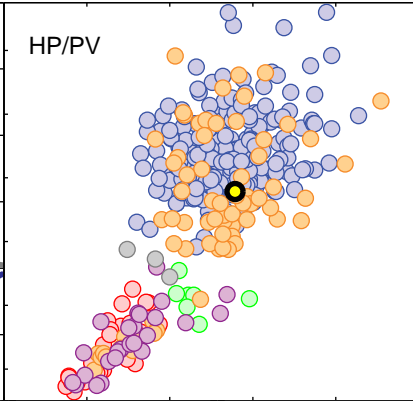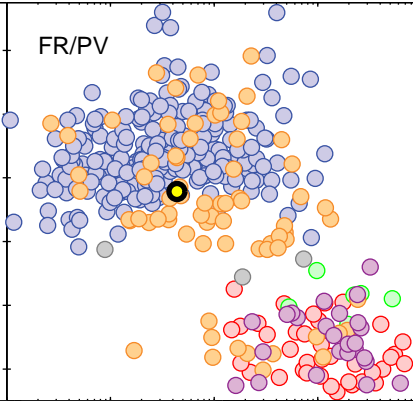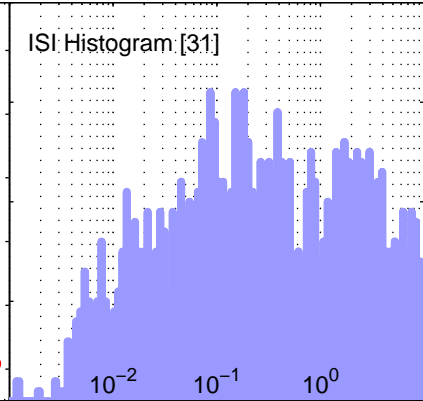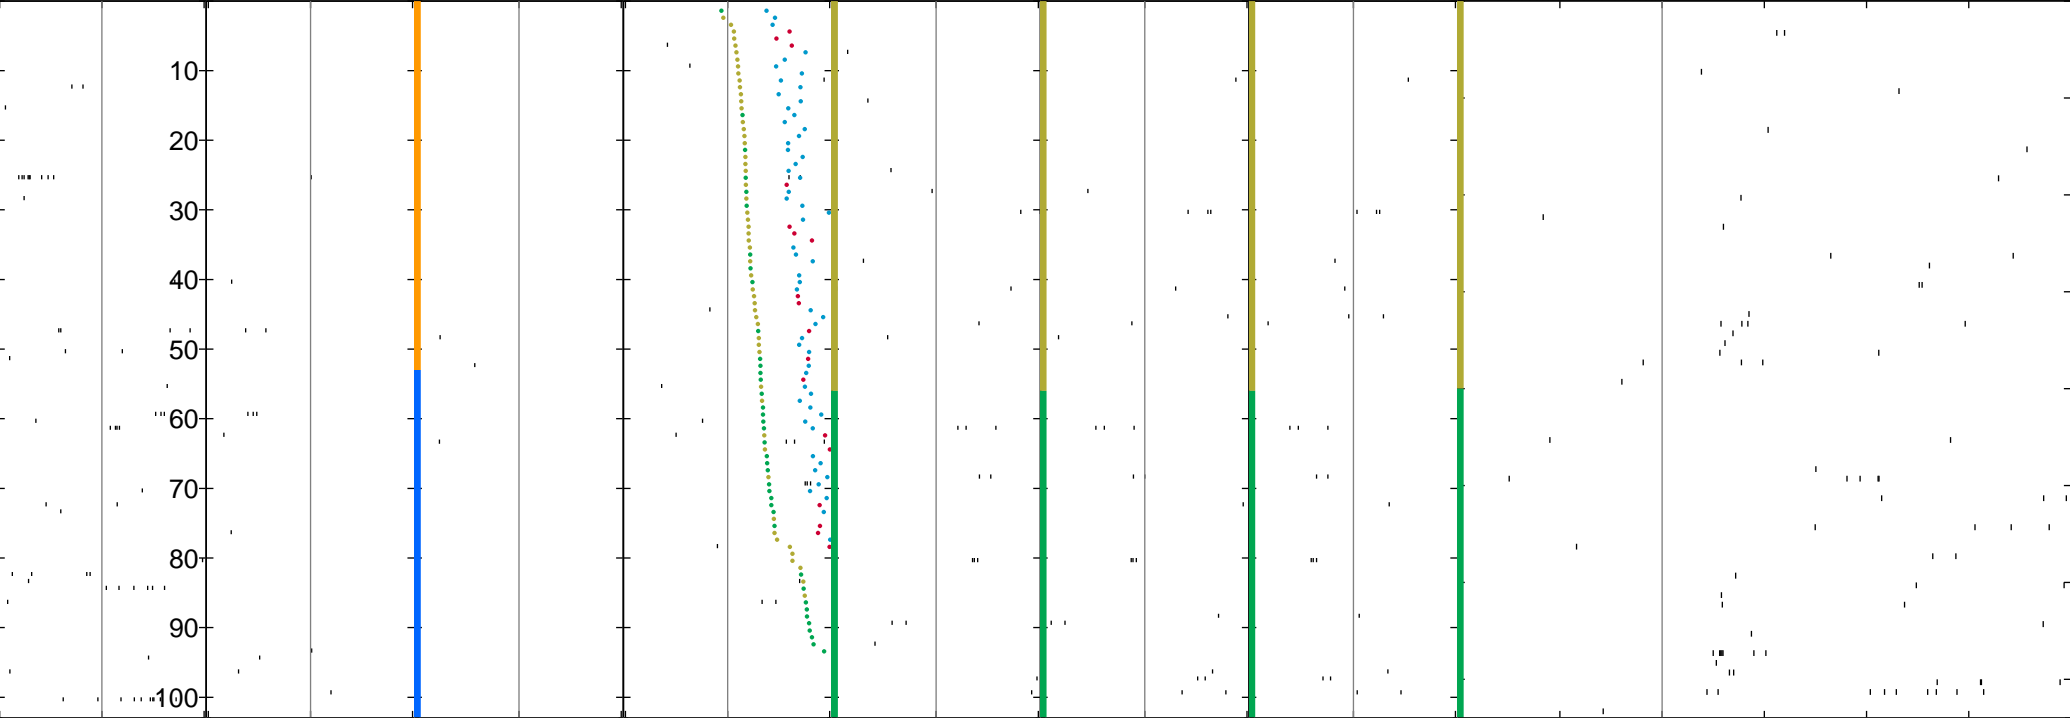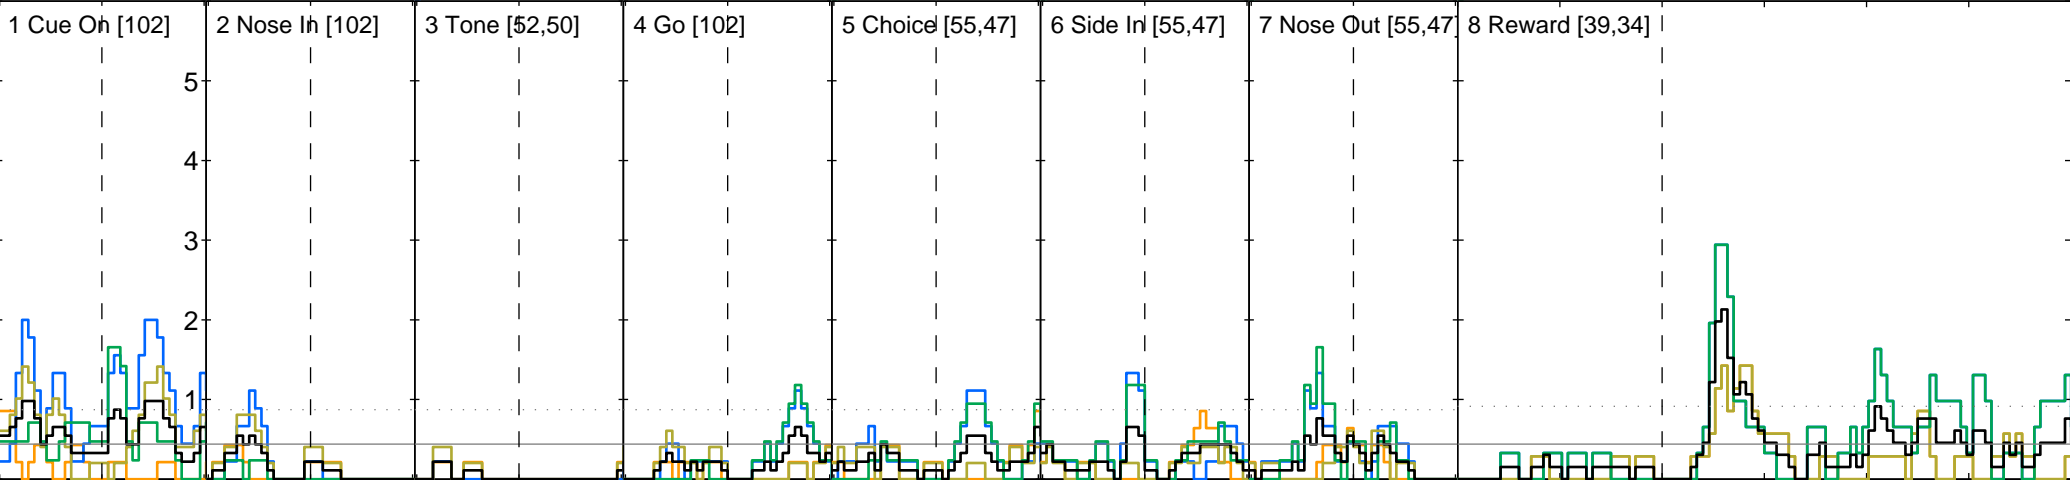

Cell: C0320070623T11g

AP: -0.96 ML: 3.7 DV: 5.9

w: 1 n: 1439  $P_{ISI>2}$ : 0.82

1/2pw: 338 $\mu$ s p->v: 1271 $\mu$ s

$\beta_T$ : NaN  $\beta_D$ : NaN

$\beta_P$ : NaN SI: NaN

Session FR: 0.38 Hz

Pk Ev: None

Pk FR: --

MSN

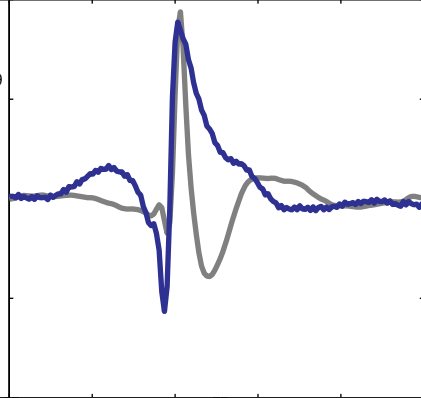

HP/PV

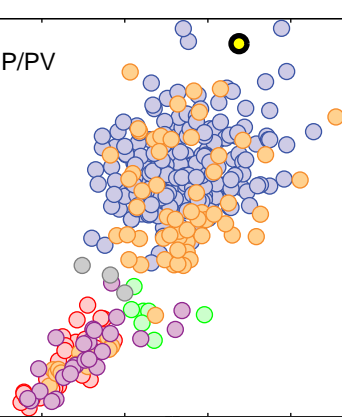

FR/PV

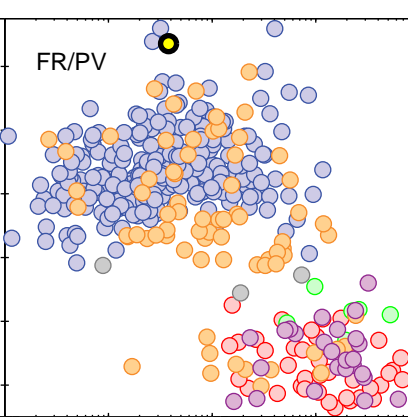

ISI Histogram [58]

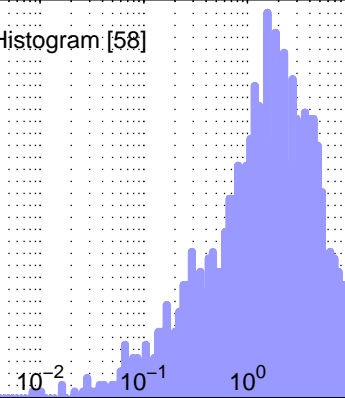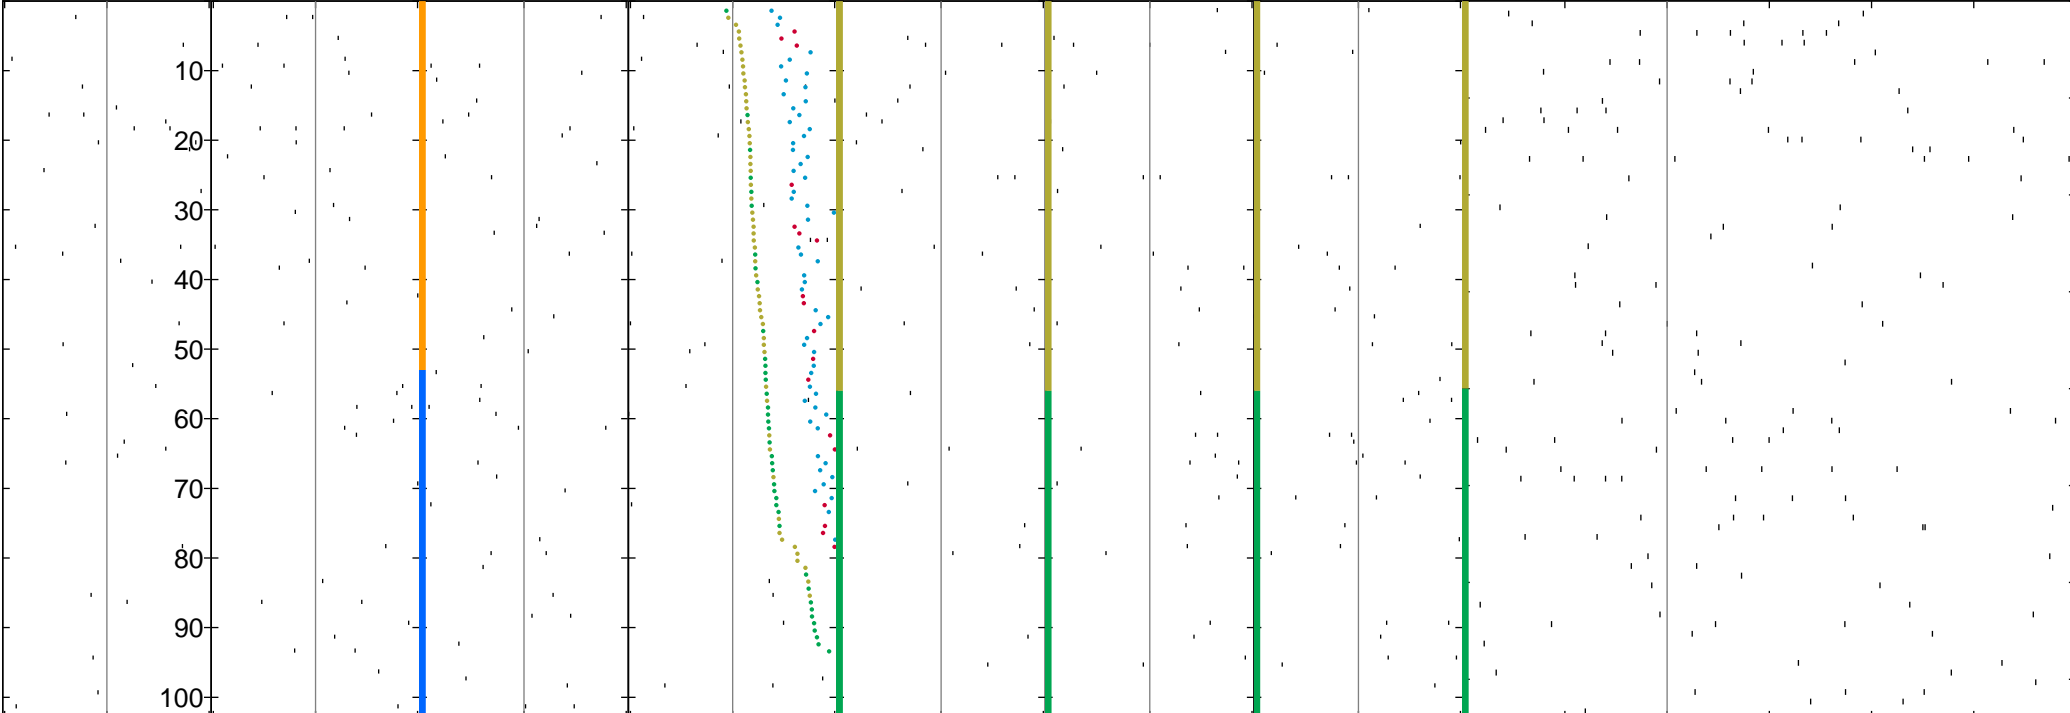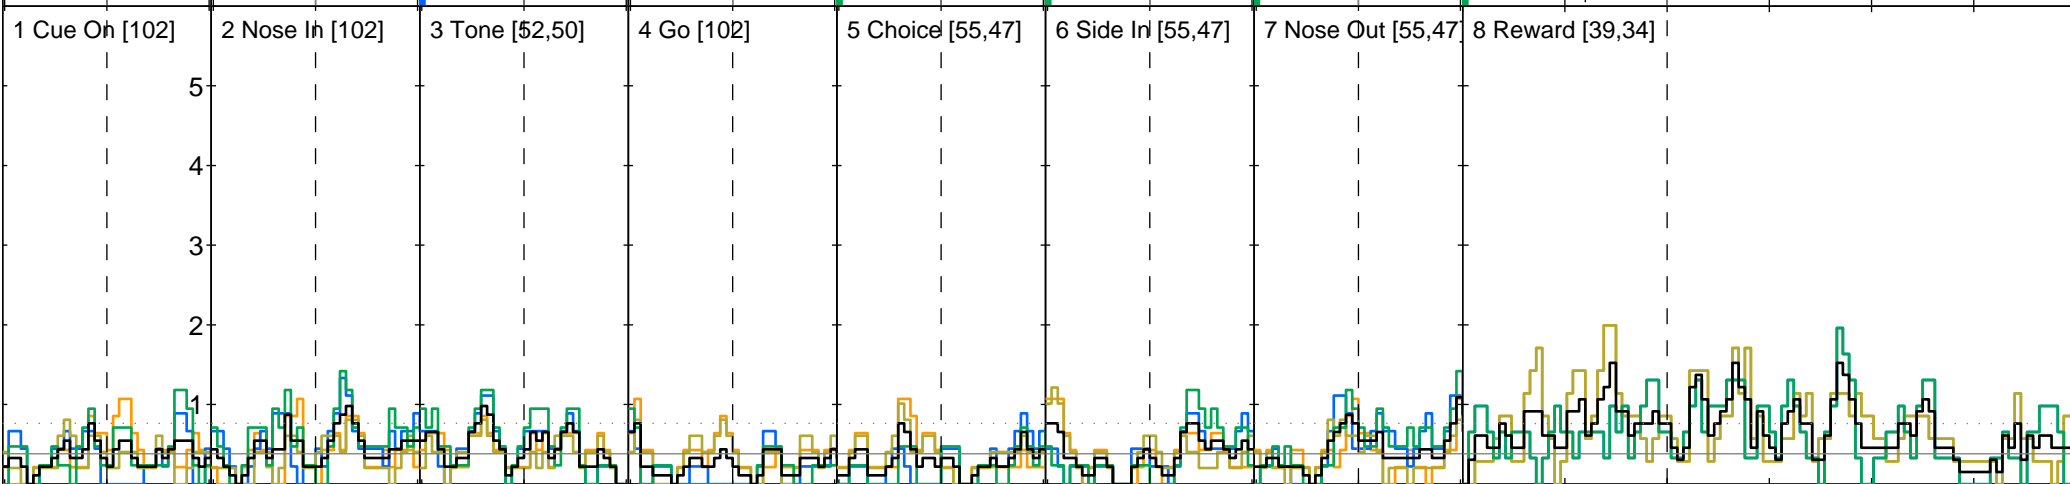



**Cell: C0320070623T11h**

AP: -0.96 ML: 3.7 DV: 5.9  
w: 1 n: 256  $P_{ISI>2}$ : 0.99  
1/2pw: 274 $\mu$ s p->v: 818 $\mu$ s  
 $\beta_T$ : NaN  $\beta_D$ : NaN  
 $\beta_P$ : NaN SI: NaN  
Session FR: 0.0716 Hz  
Pk Ev: None  
Pk FR: --

MSN

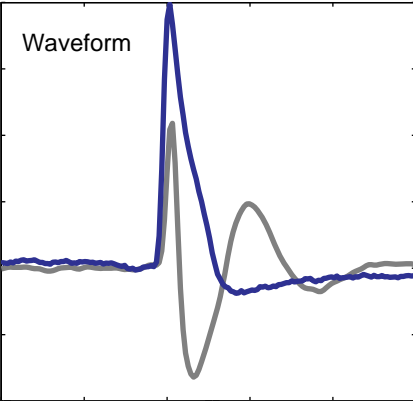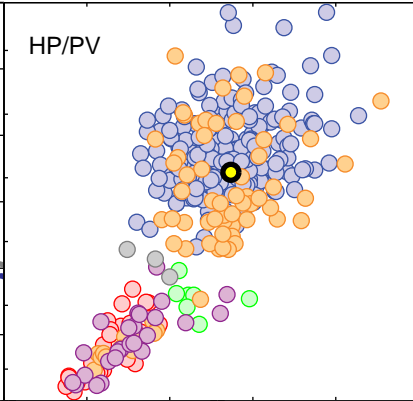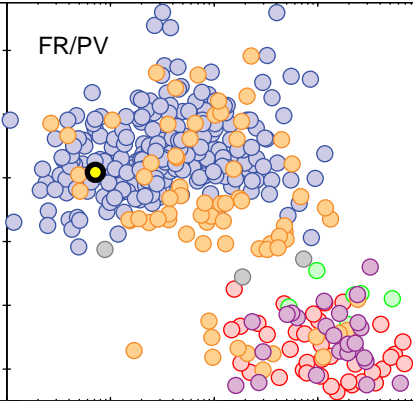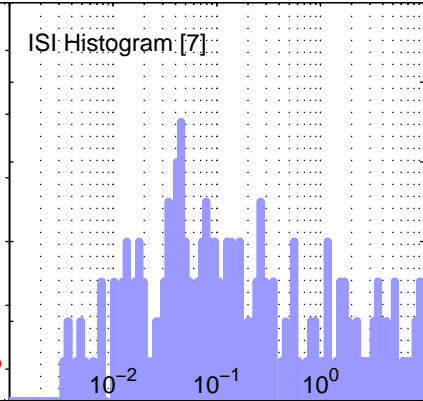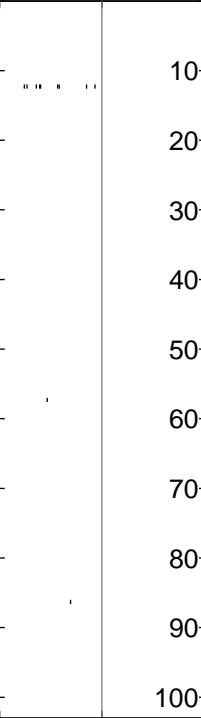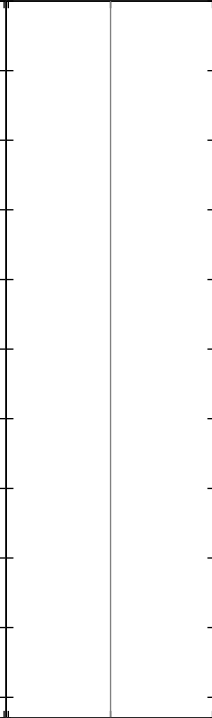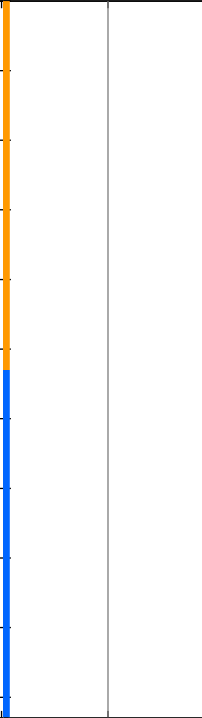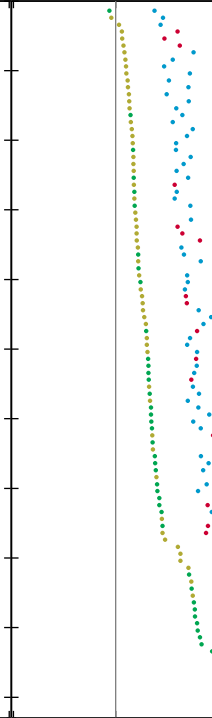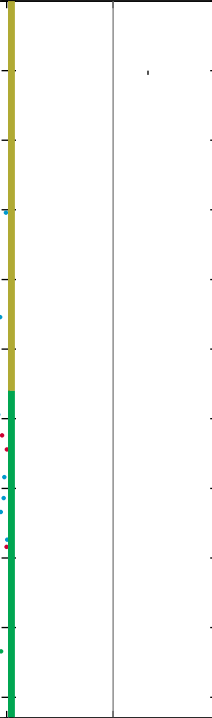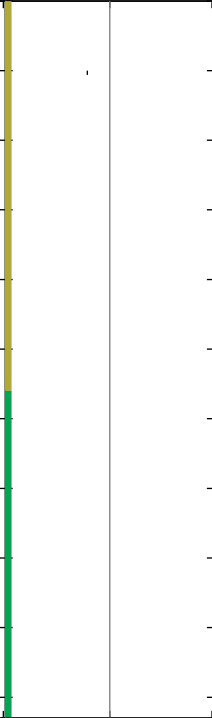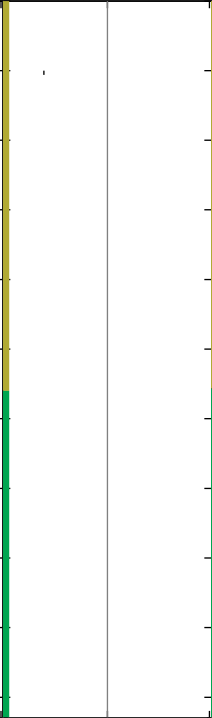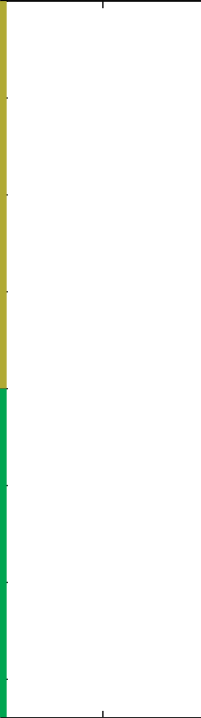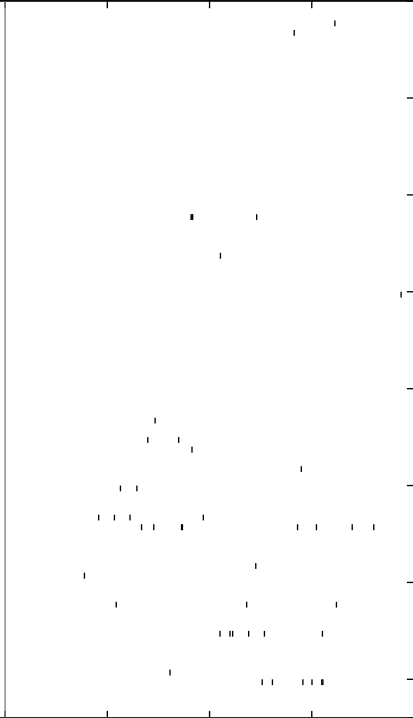

1 Cue On [102]

2 Nose In [102]

3 Tone [52,50]

4 Go [102]

5 Choice [55,47]

6 Side In [55,47]

7 Nose Out [55,47]

8 Reward [39,34]

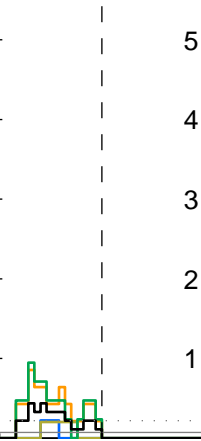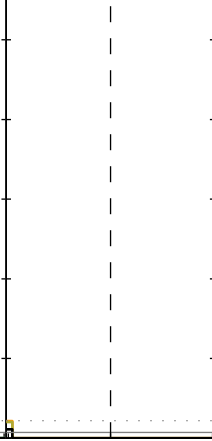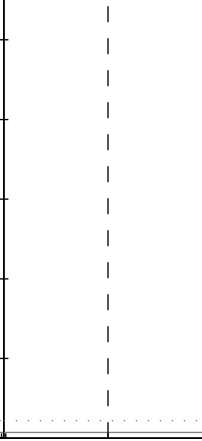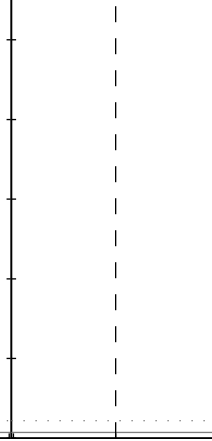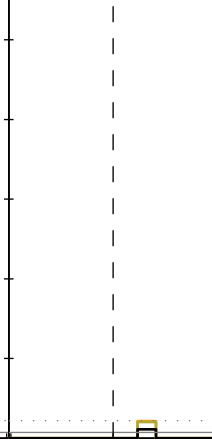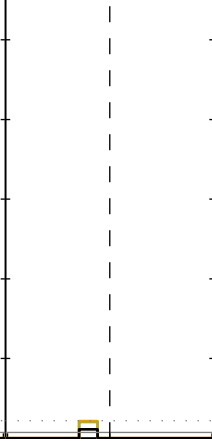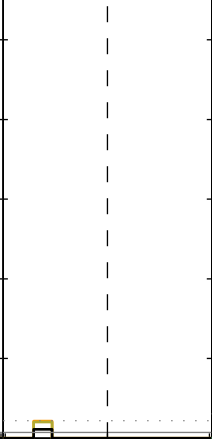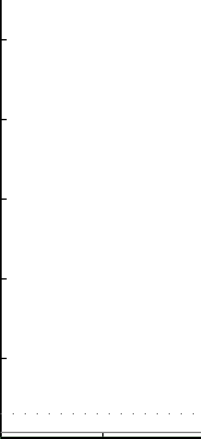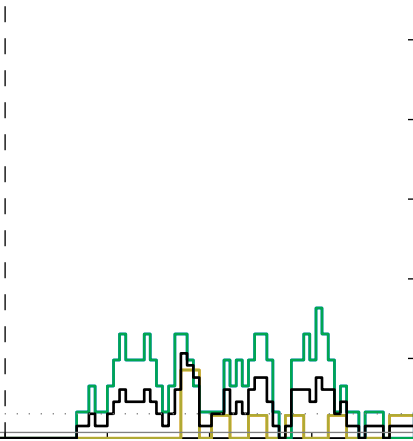

**Cell: C0320070624T07c**

AP: 0.96 ML: 3.6 DV: 6.5

w: 2 n: 1642  $P_{ISI>2}$ : 0.84

1/2pw: 307 $\mu$ s p $\rightarrow$ v: 962 $\mu$ s

$\beta_T$ : 1.7  $\beta_D$ : -4.5

$\beta_P$ : 2.5 SI: NaN

Session FR: 0.441 Hz

Pk Ev: None

Pk FR: --

MSN

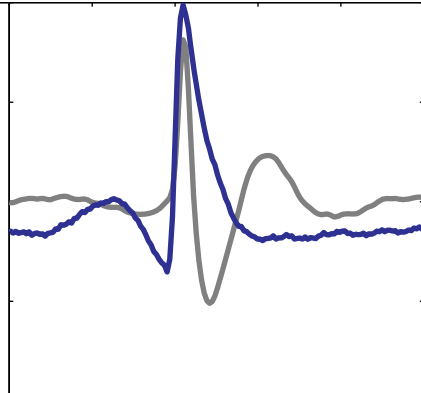

HP/PV

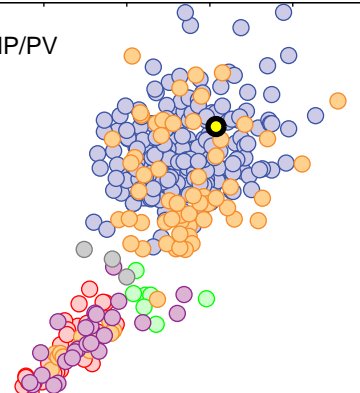

FR/PV

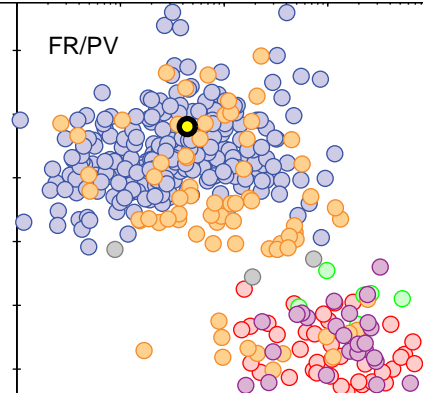

ISI Histogram [50]

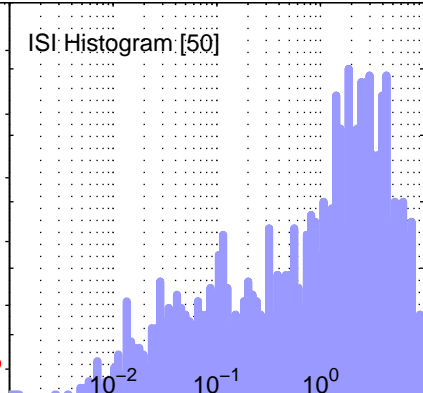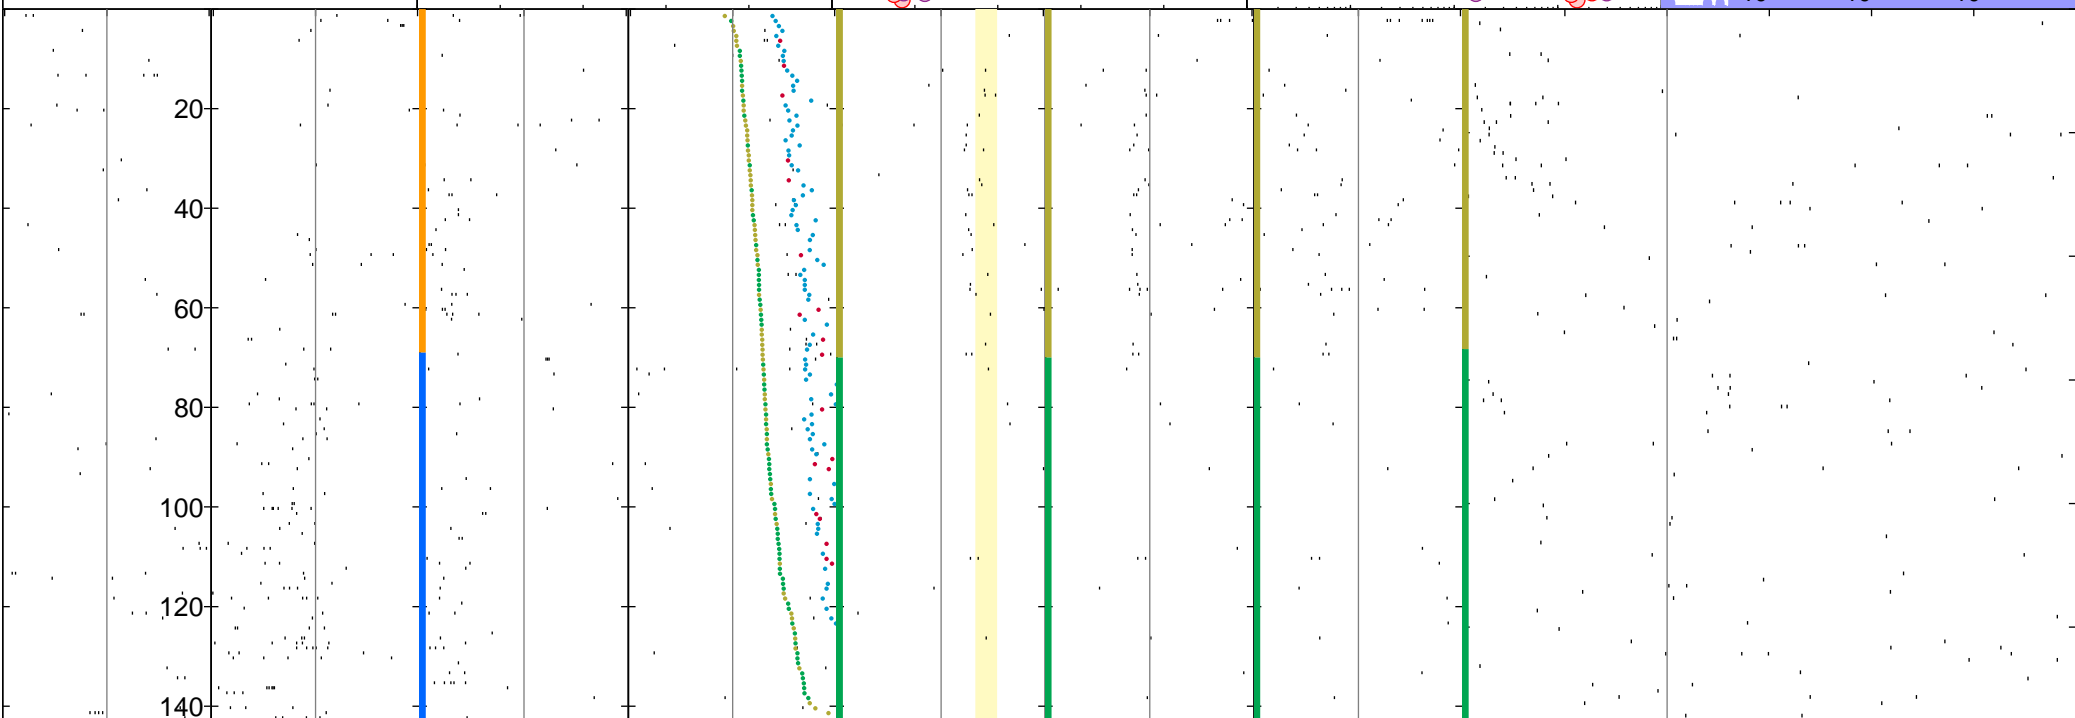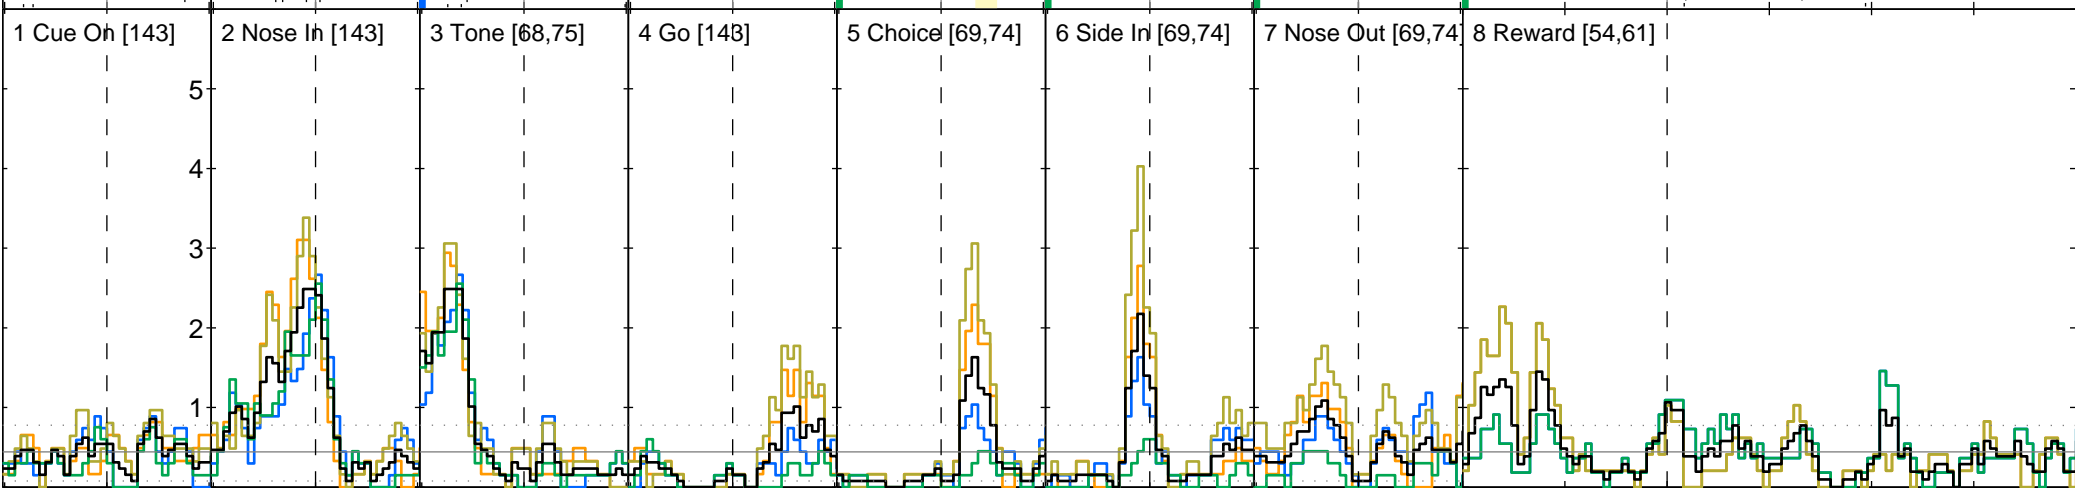

**Cell: C0320070624T07d**

AP: 0.96 ML: 3.6 DV: 6.5  
w: 4 n: 150  $P_{ISI>2}$ : 1  
1/2pw: 232 $\mu$ s p->v: 851 $\mu$ s  
 $\beta_T$ : NaN  $\beta_D$ : NaN  
 $\beta_P$ : NaN SI: NaN  
Session FR: 0.0425 Hz  
Pk Ev: None  
Pk FR: --

MSN

Waveform

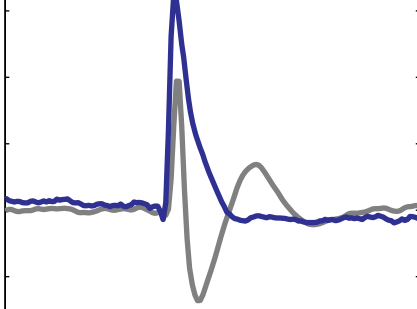

HP/PV

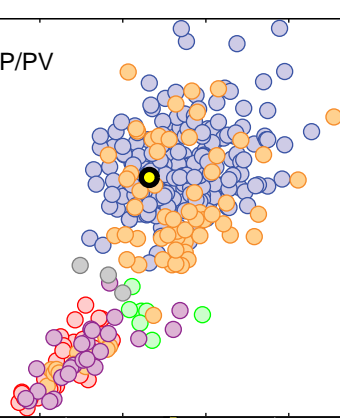

FR/PV

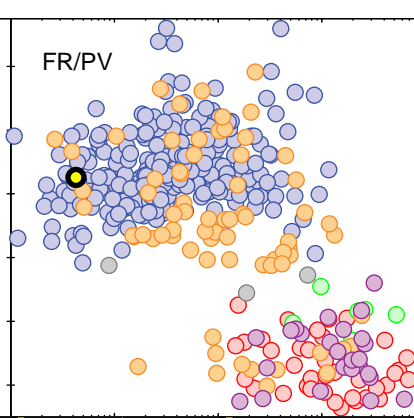

ISI Histogram [6]

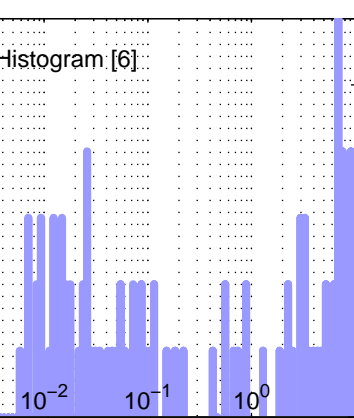

20  
40  
60  
80  
100  
120  
140

1 Cue On [143] 2 Nose In [143] 3 Tone [68,75] 4 Go [148] 5 Choice [69,74] 6 Side In [69,74] 7 Nose Out [69,74] 8 Reward [54,61]

5  
4  
3  
2  
1

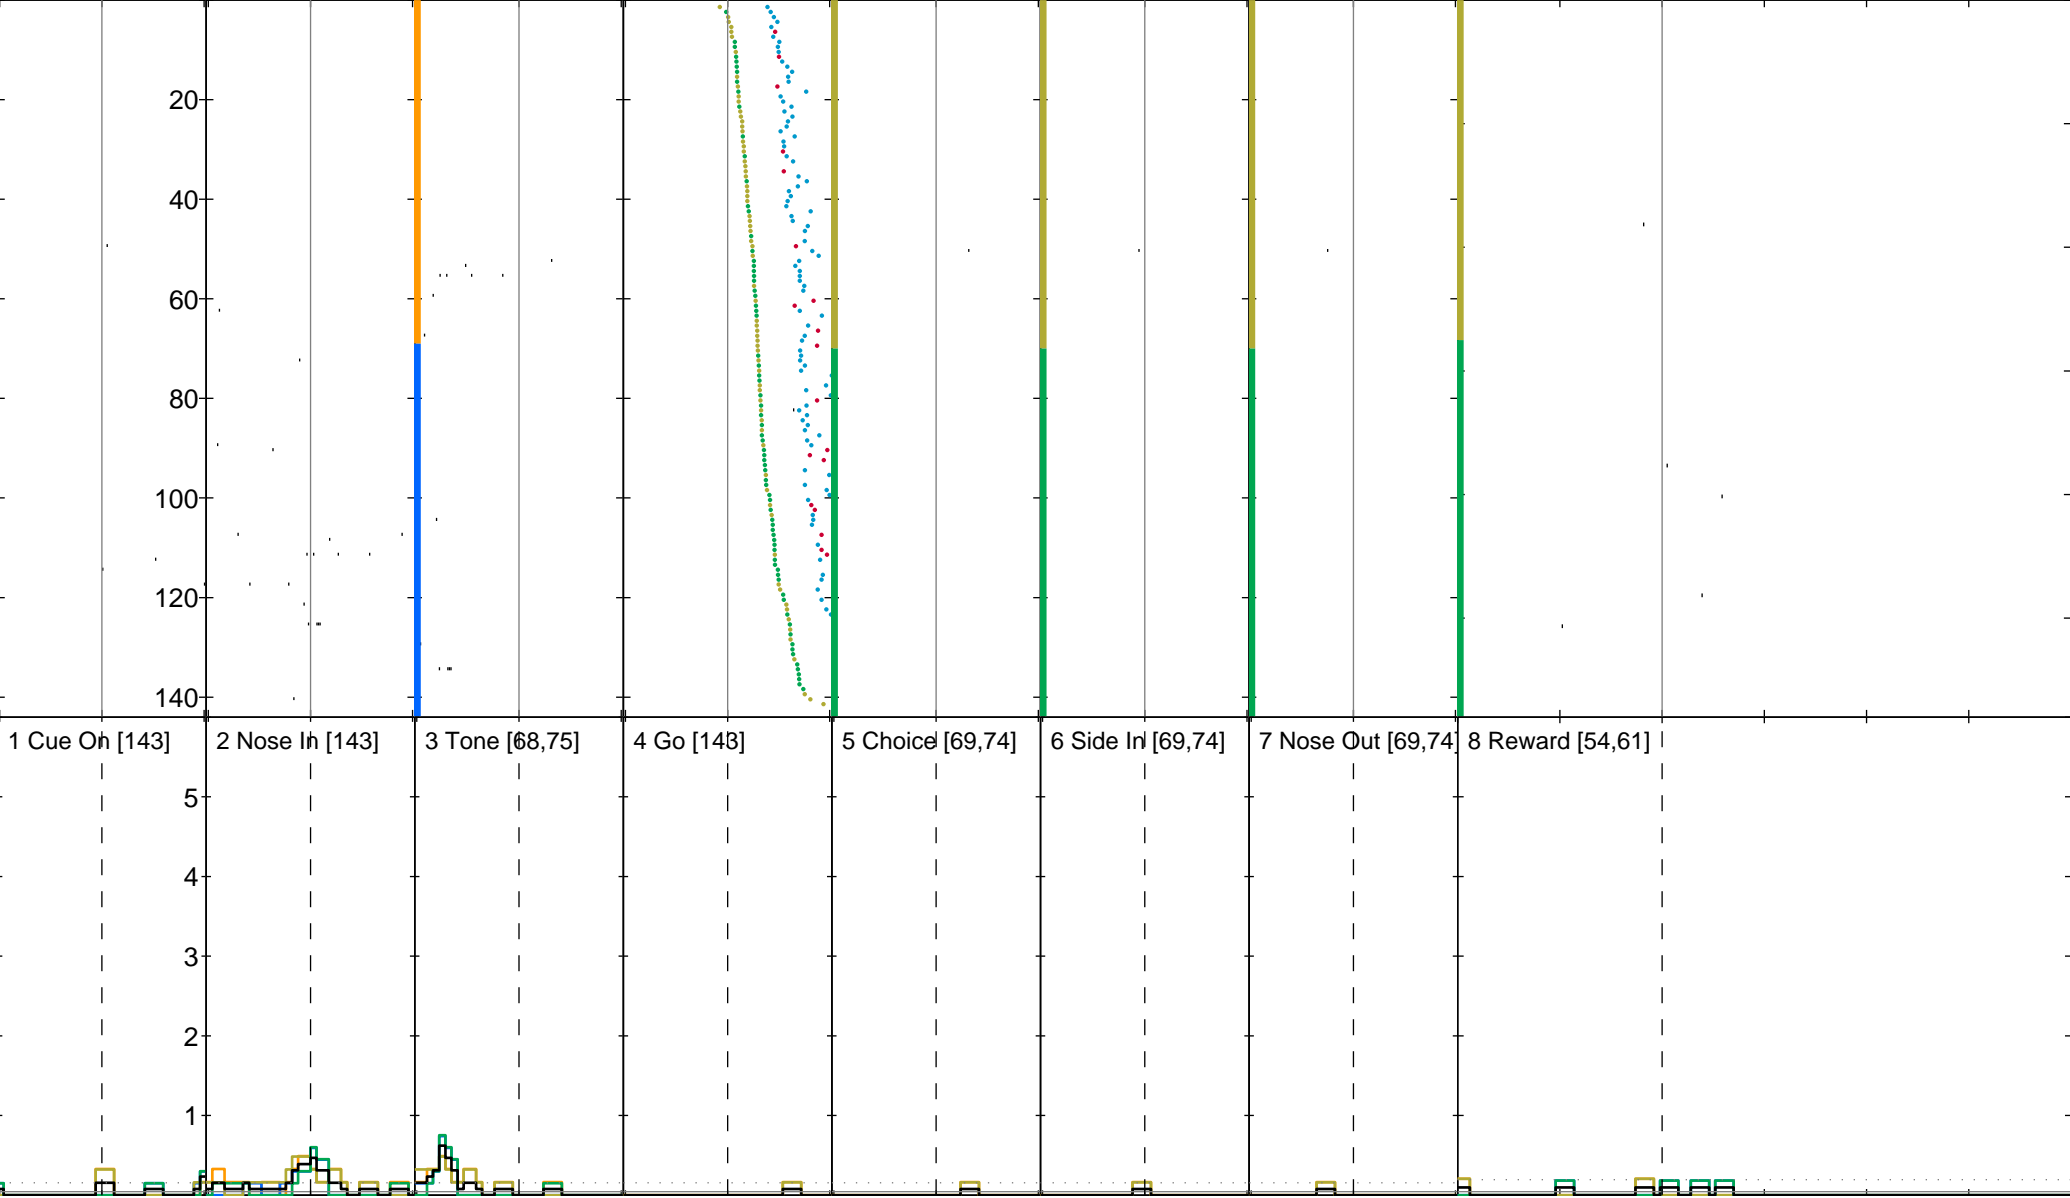

**Cell: C0320070624T09b**

AP: 1.6 ML: 3.7 DV: 5.4  
w: 2 n: 943  $P_{ISI>2}$ : 0.93  
1/2pw: 208 $\mu$ s p $\rightarrow$ v: 720 $\mu$ s  
 $\beta_T$ : NaN  $\beta_D$ : NaN  
 $\beta_P$ : NaN SI: NaN  
Session FR: 0.253 Hz  
Pk Ev: None  
Pk FR: --

MSN

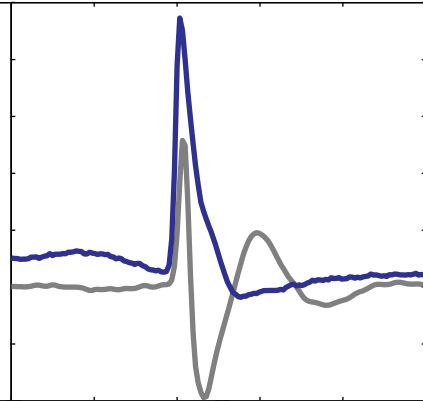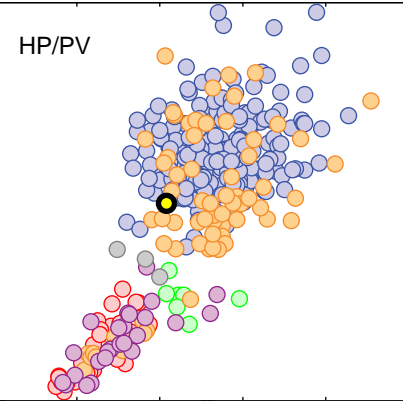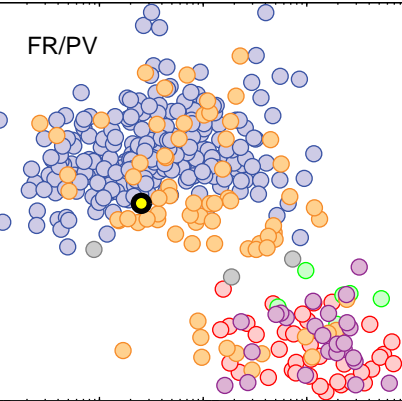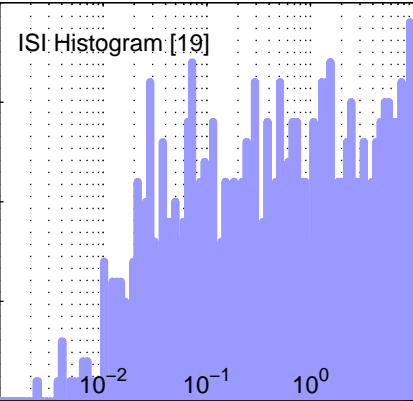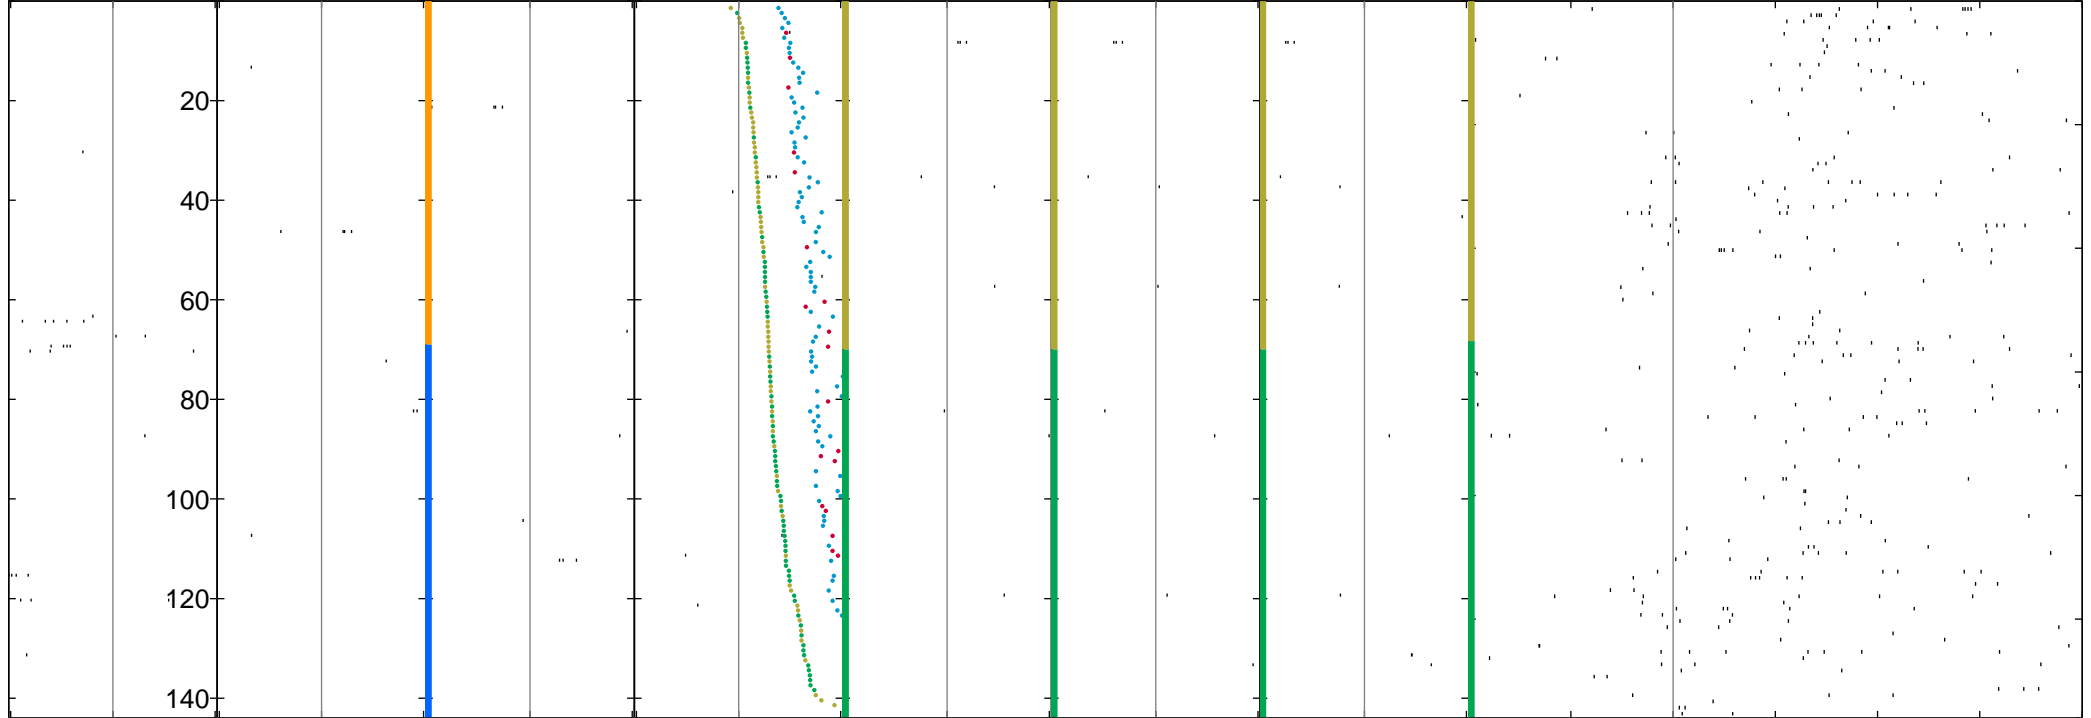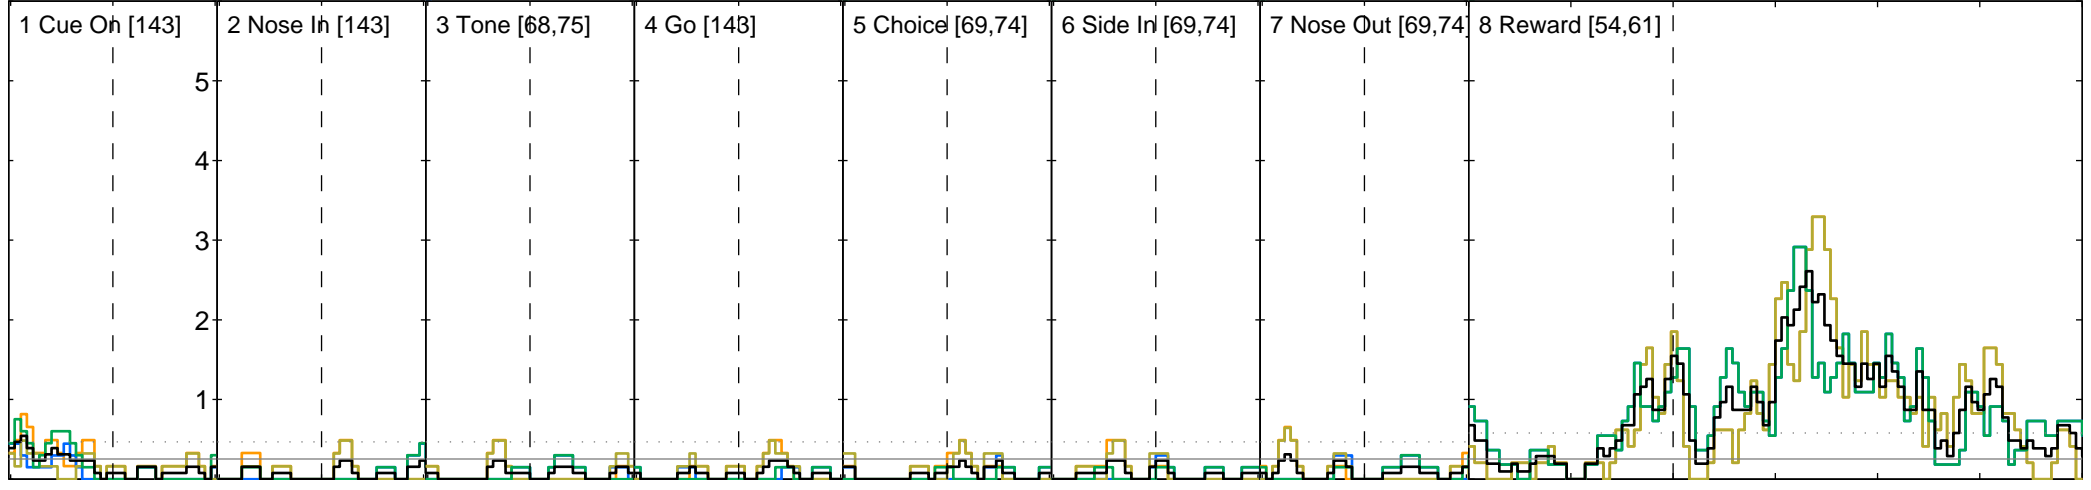

**Cell: C0320070624T09d**

AP: 1.6 ML: 3.7 DV: 5.4  
w: 4 n: 138  $P_{ISI>2}$ : 1  
1/2pw: 214 $\mu$ s p->v: 754 $\mu$ s  
 $\beta_T$ : NaN  $\beta_D$ : NaN  
 $\beta_P$ : NaN SI: NaN  
Session FR: 0.0377 Hz  
Pk Ev: None  
Pk FR: --

MSN

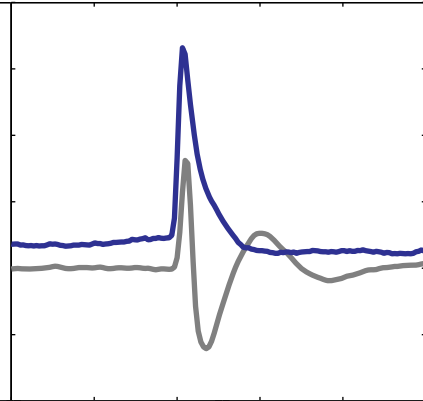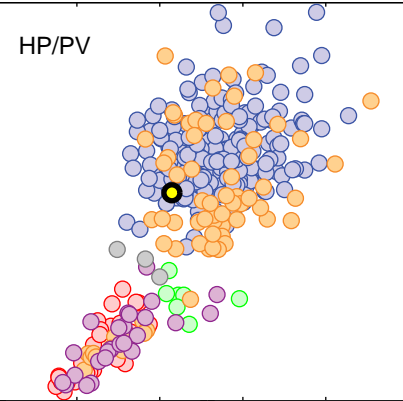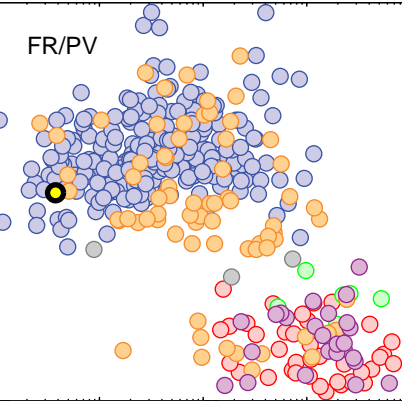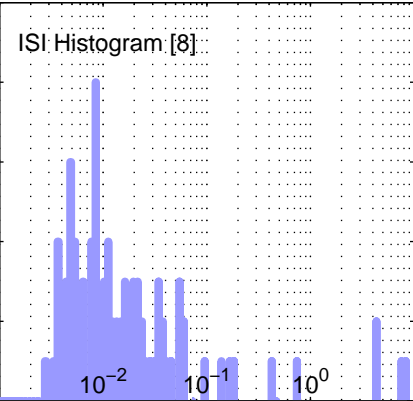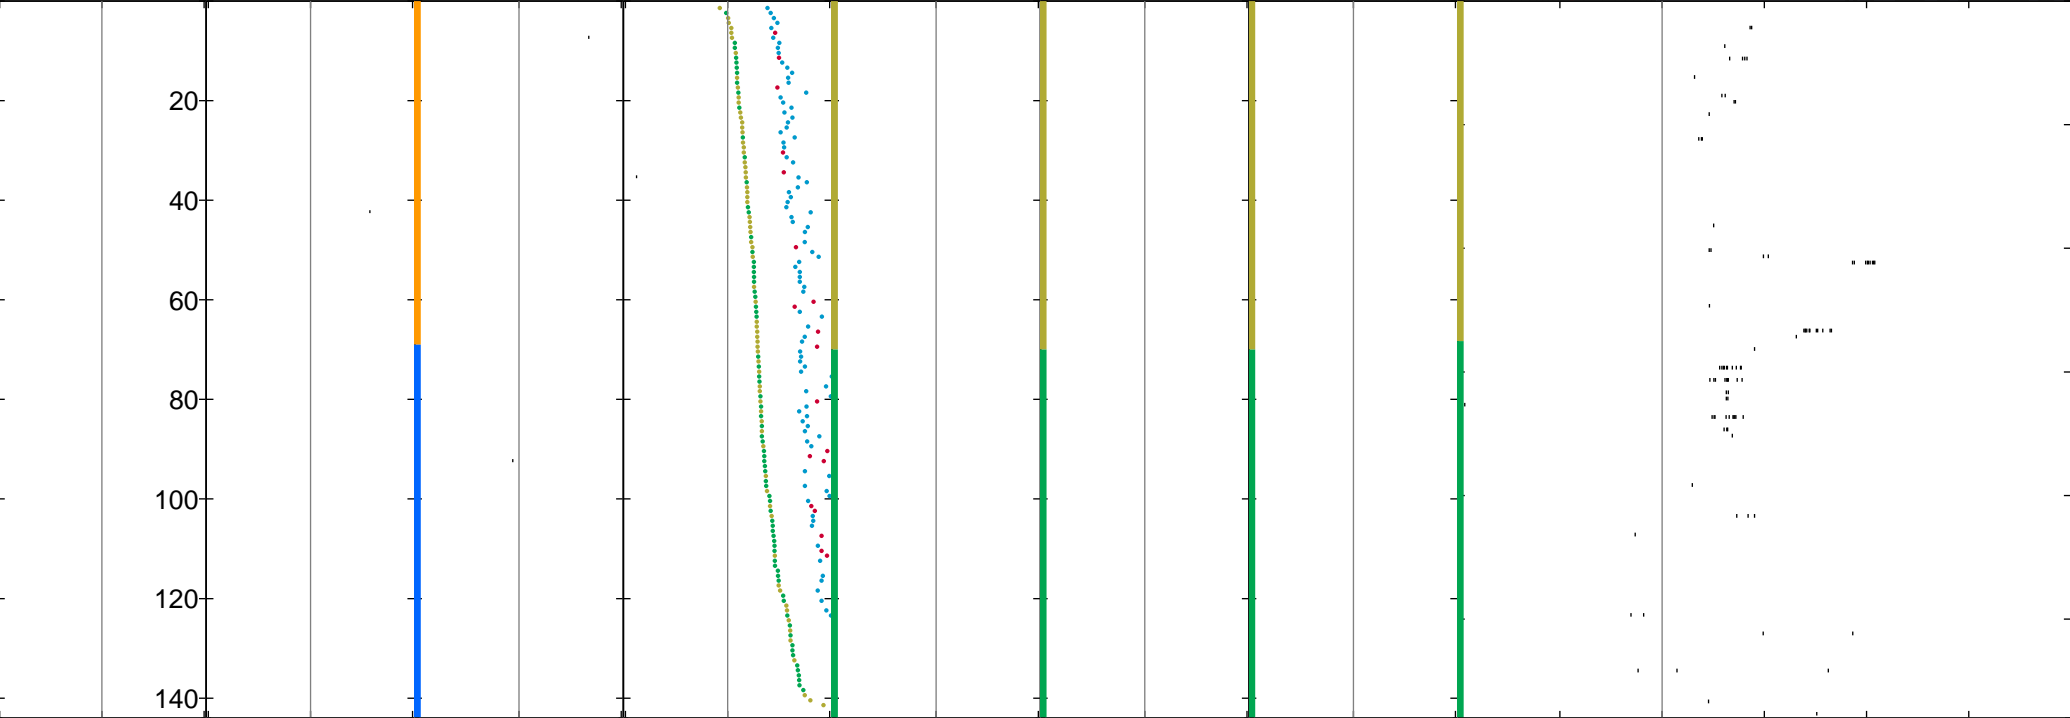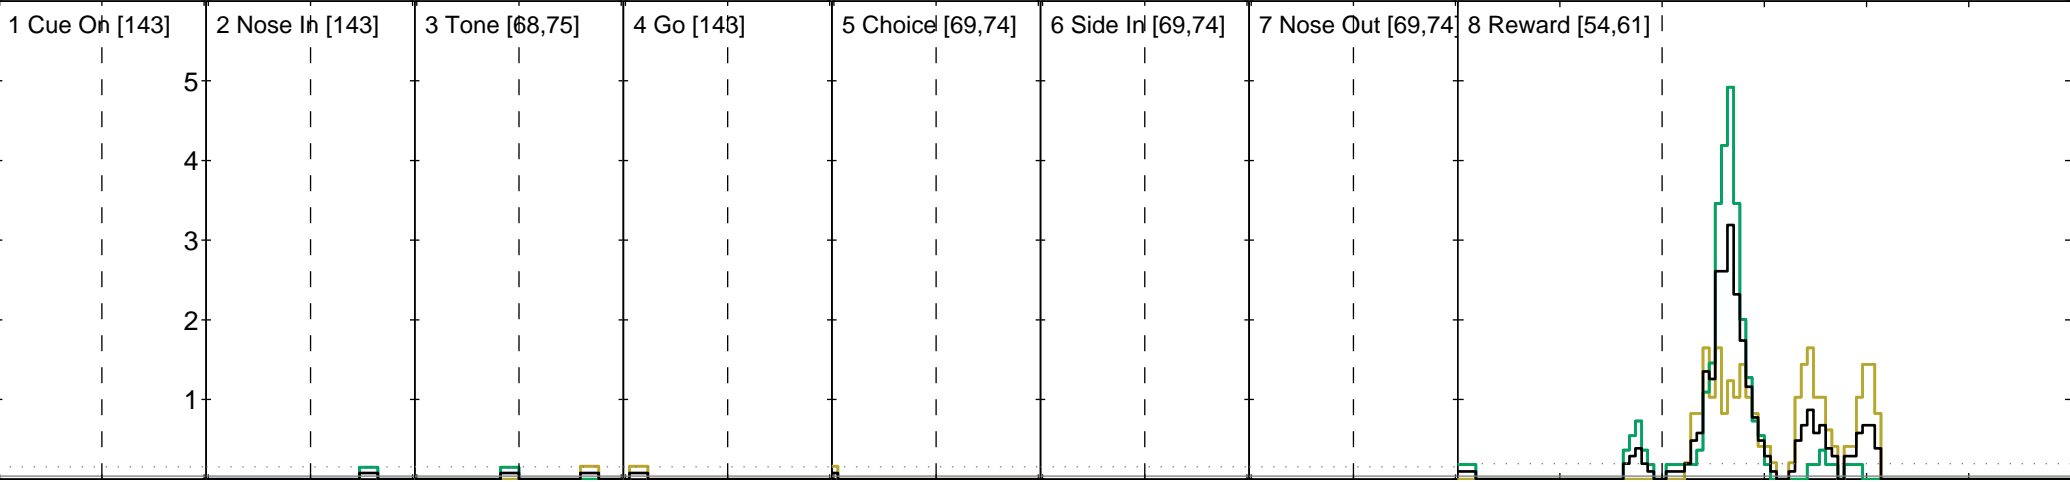

**Cell: C0320070624T09e**

AP: 1.6 ML: 3.7 DV: 5.4  
w: 3 n: 214  $P_{ISI>2}$ : 0.99  
1/2pw: 230 $\mu$ s p->v: 808 $\mu$ s  
 $\beta_T$ : NaN  $\beta_D$ : NaN  
 $\beta_P$ : NaN SI: NaN  
Session FR: 0.0576 Hz  
Pk Ev: None  
Pk FR: --

MSN

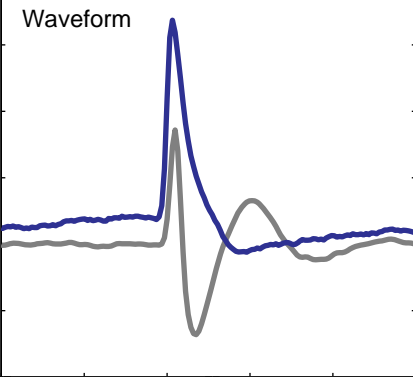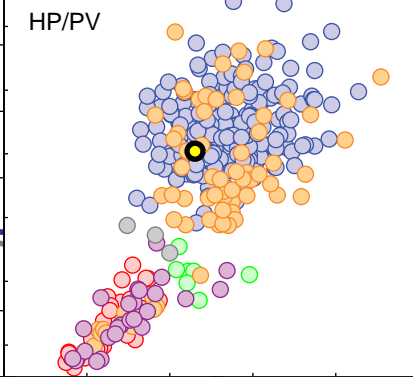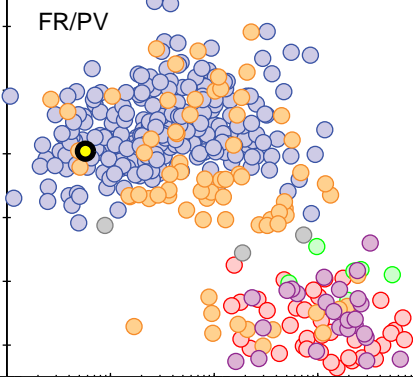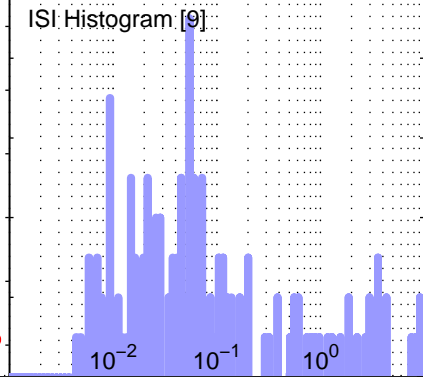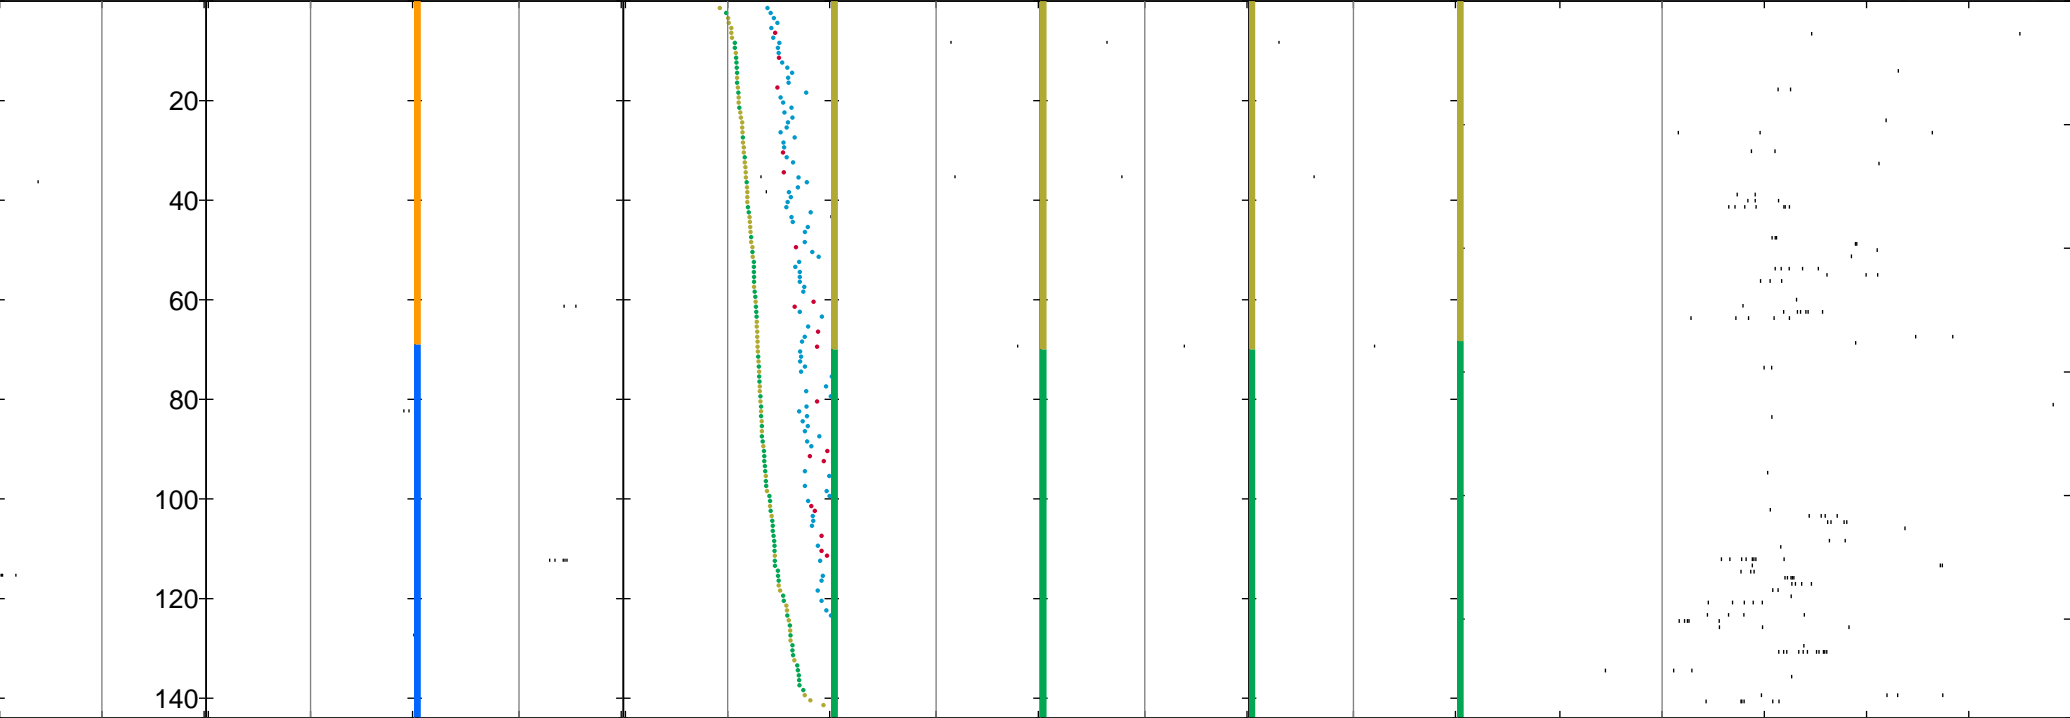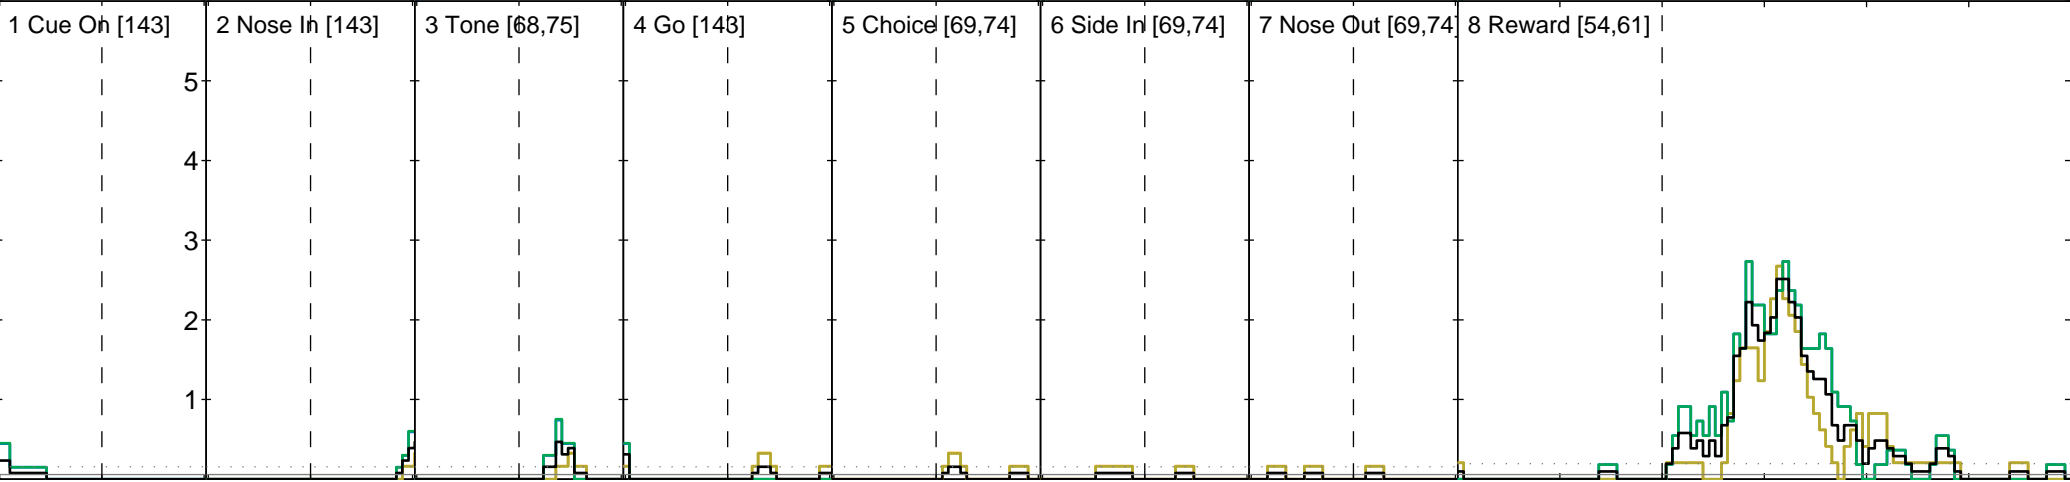

**Cell: C0320070624T11a**

AP: -0.96 ML: 3.7 DV: 6.1  
w: 1 n: 280  $P_{ISI>2}$ : 0.99  
1/2pw: 240 $\mu$ s p->v: 805 $\mu$ s  
 $\beta_T$ : NaN  $\beta_D$ : NaN  
 $\beta_P$ : NaN SI: NaN  
Session FR: 0.0768 Hz  
Pk Ev: None  
Pk FR: --

MSN

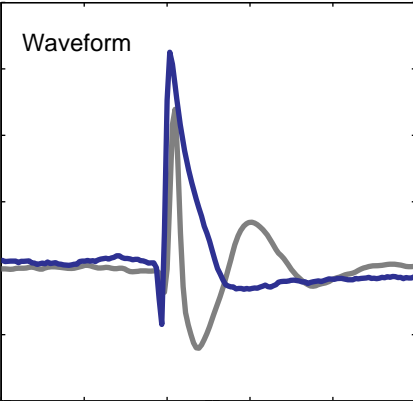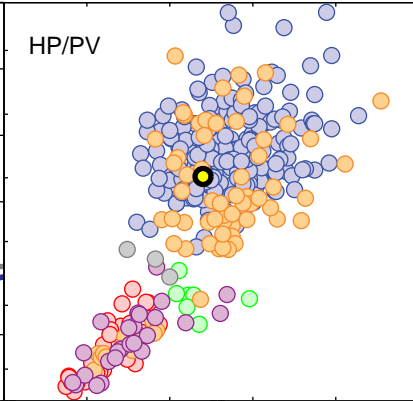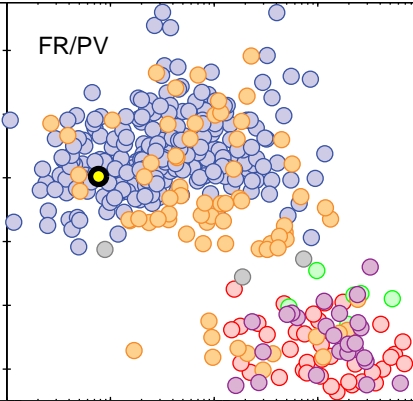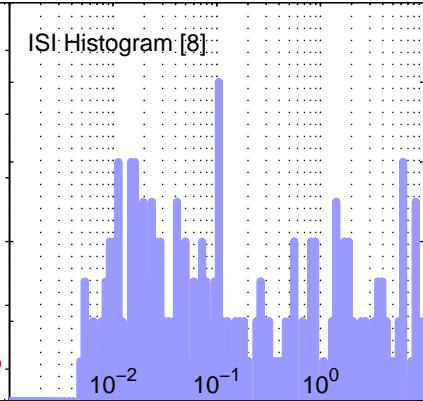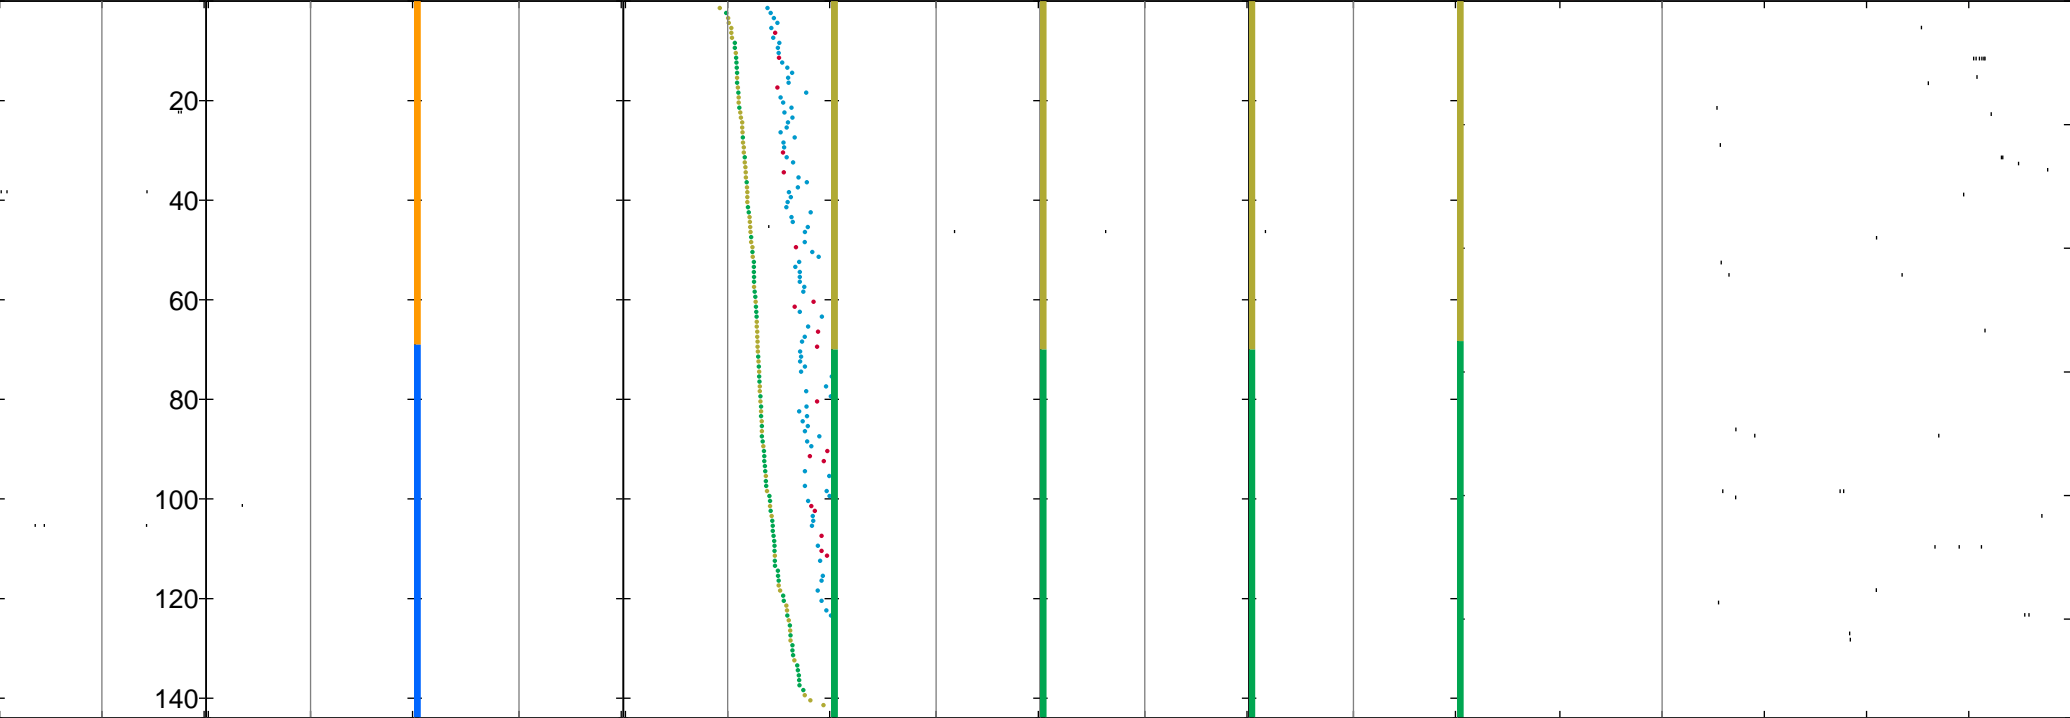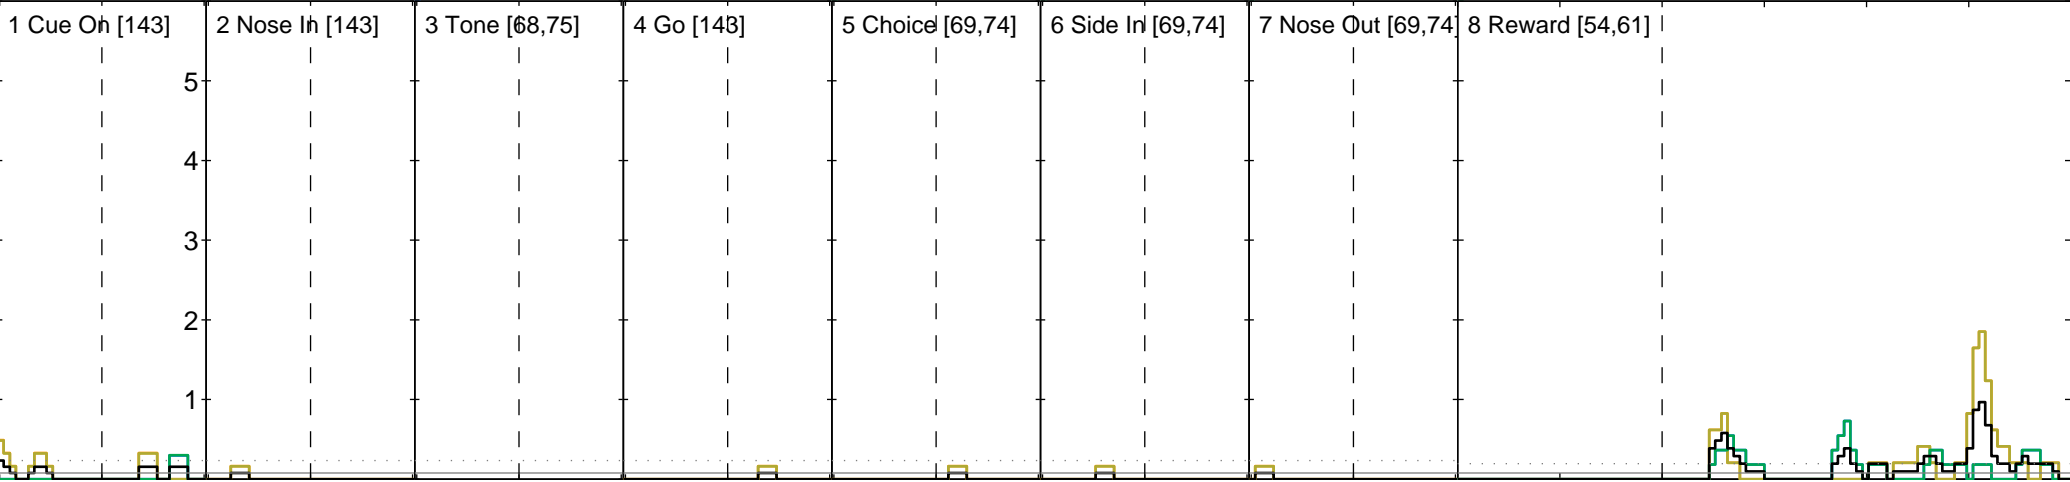

**Cell: C0320070624T11b**

AP: -0.96 ML: 3.7 DV: 6.1  
w: 4 n: 761  $P_{ISI>2}$ : 0.98  
1/2pw: 277 $\mu$ s p->v: 875 $\mu$ s  
 $\beta_T$ : NaN  $\beta_D$ : NaN  
 $\beta_P$ : NaN SI: NaN  
Session FR: 0.205 Hz  
Pk Ev: None  
Pk FR: --

MSN

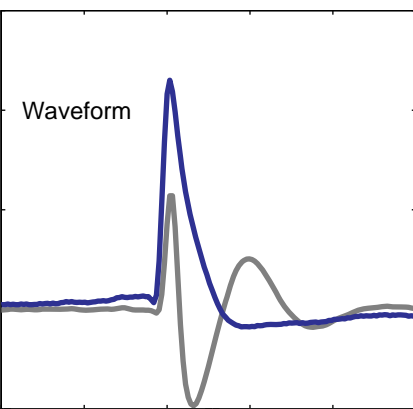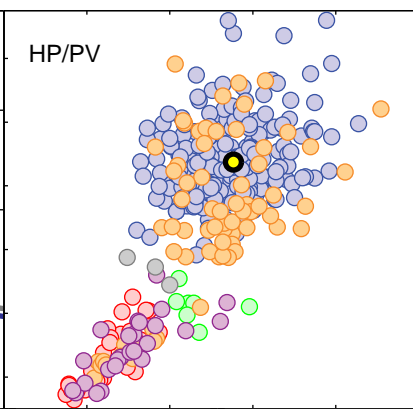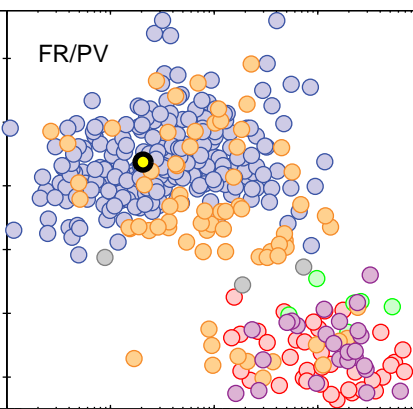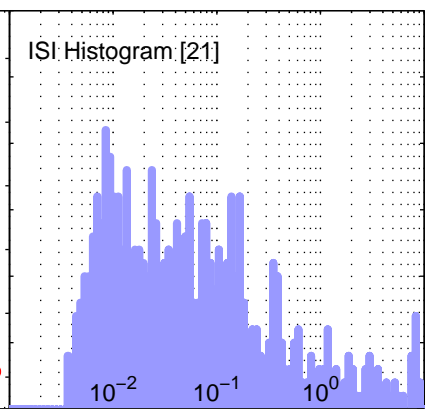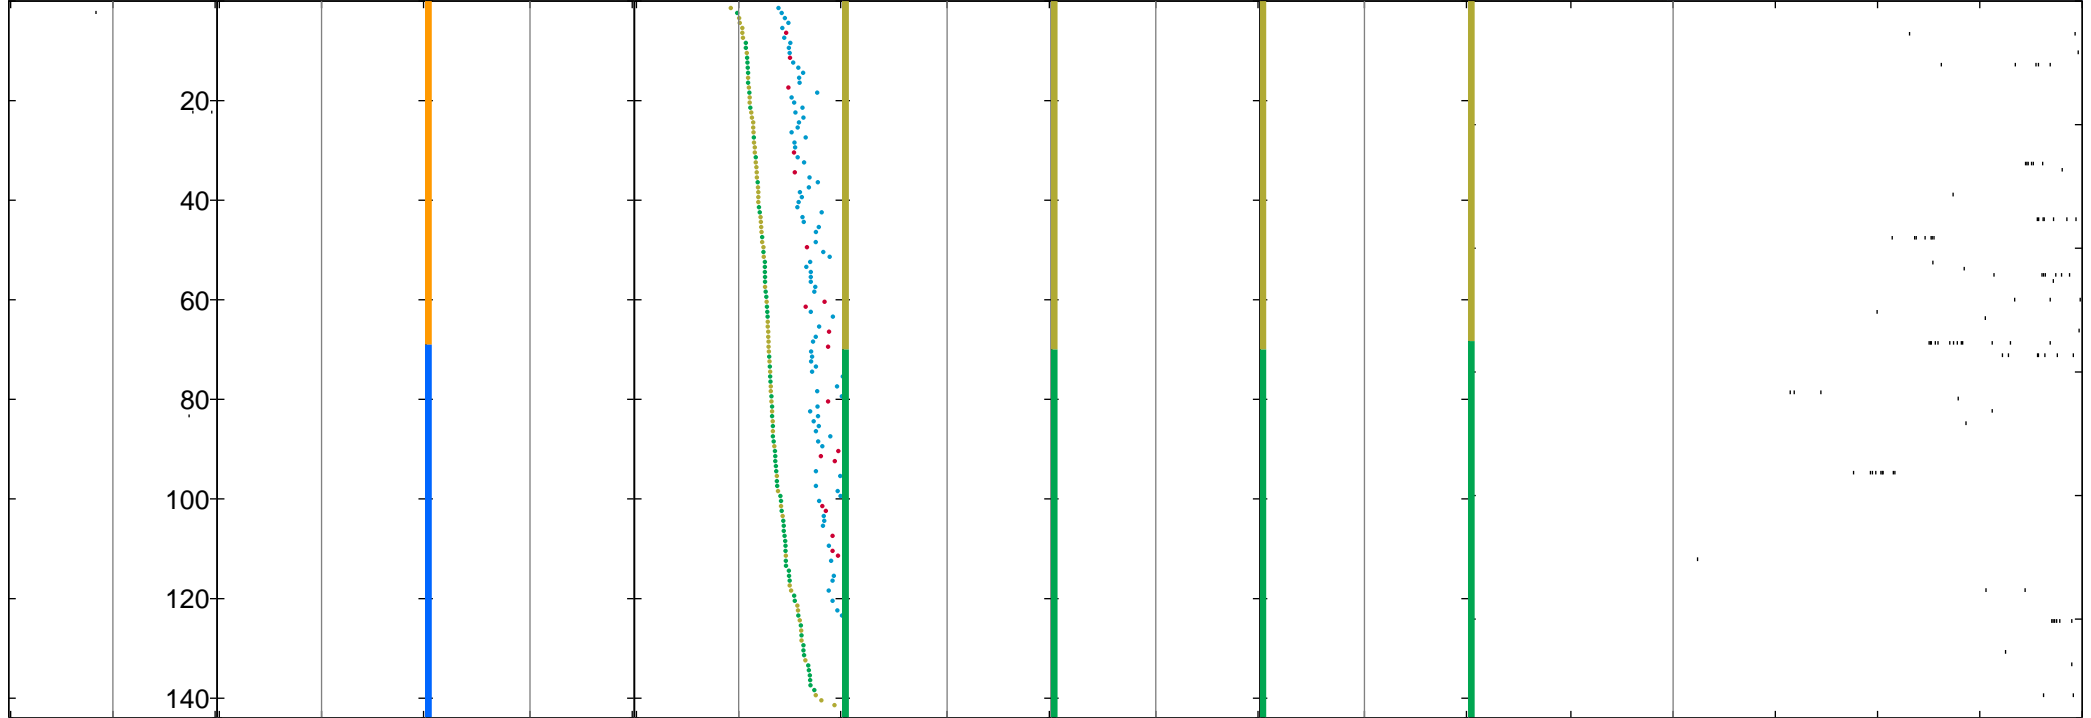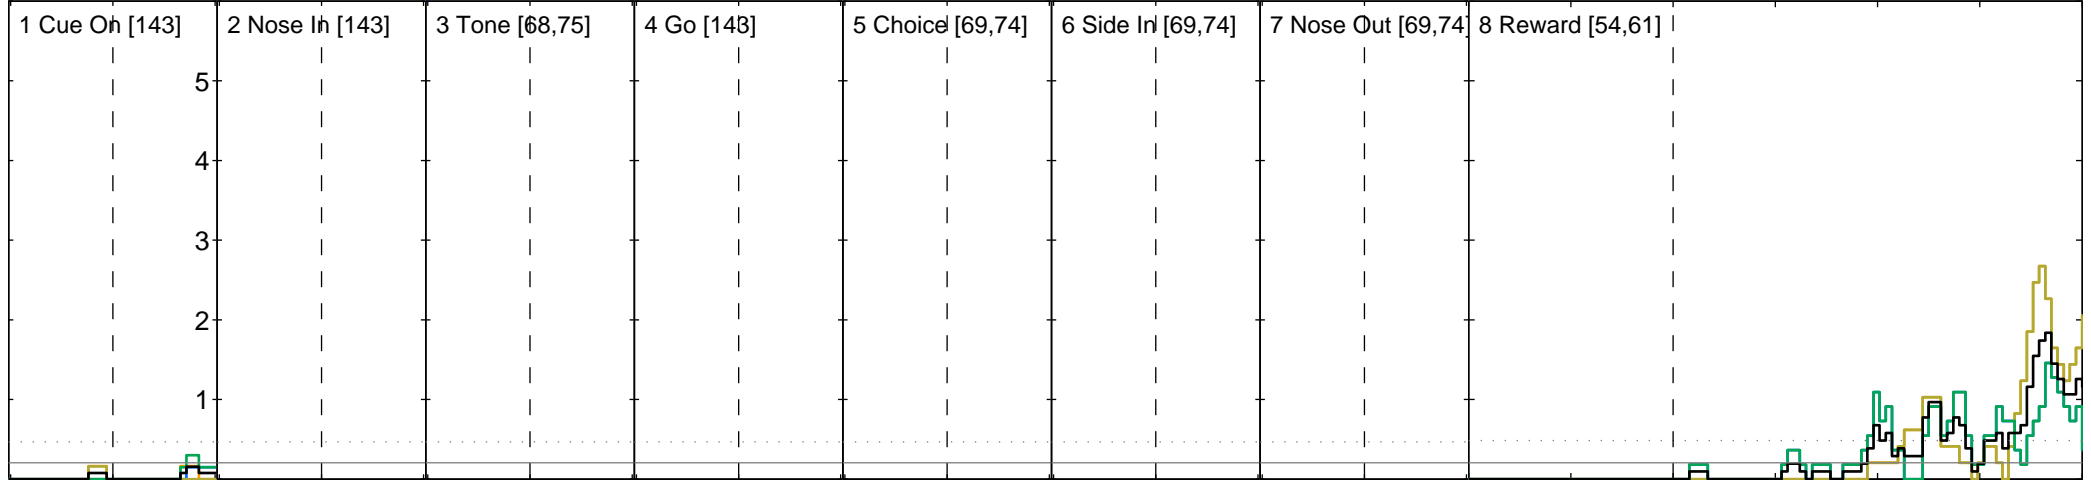



**Cell: C0320070624T11c**

AP: -0.96 ML: 3.7 DV: 6.1  
w: 2 n: 450  $P_{ISI>2}$ : 0.98  
1/2pw: 278 $\mu$ s p->v: 762 $\mu$ s  
 $\beta_T$ : NaN  $\beta_D$ : NaN  
 $\beta_P$ : NaN SI: NaN  
Session FR: 0.123 Hz  
Pk Ev: None  
Pk FR: --

MSN

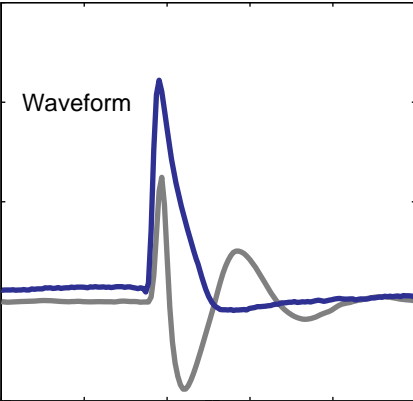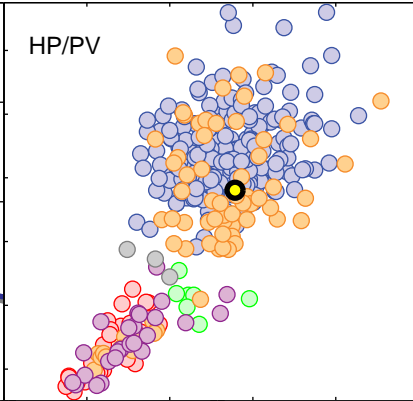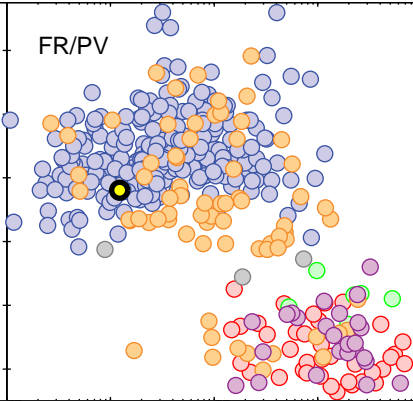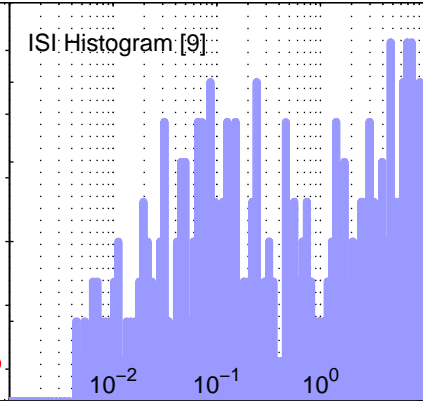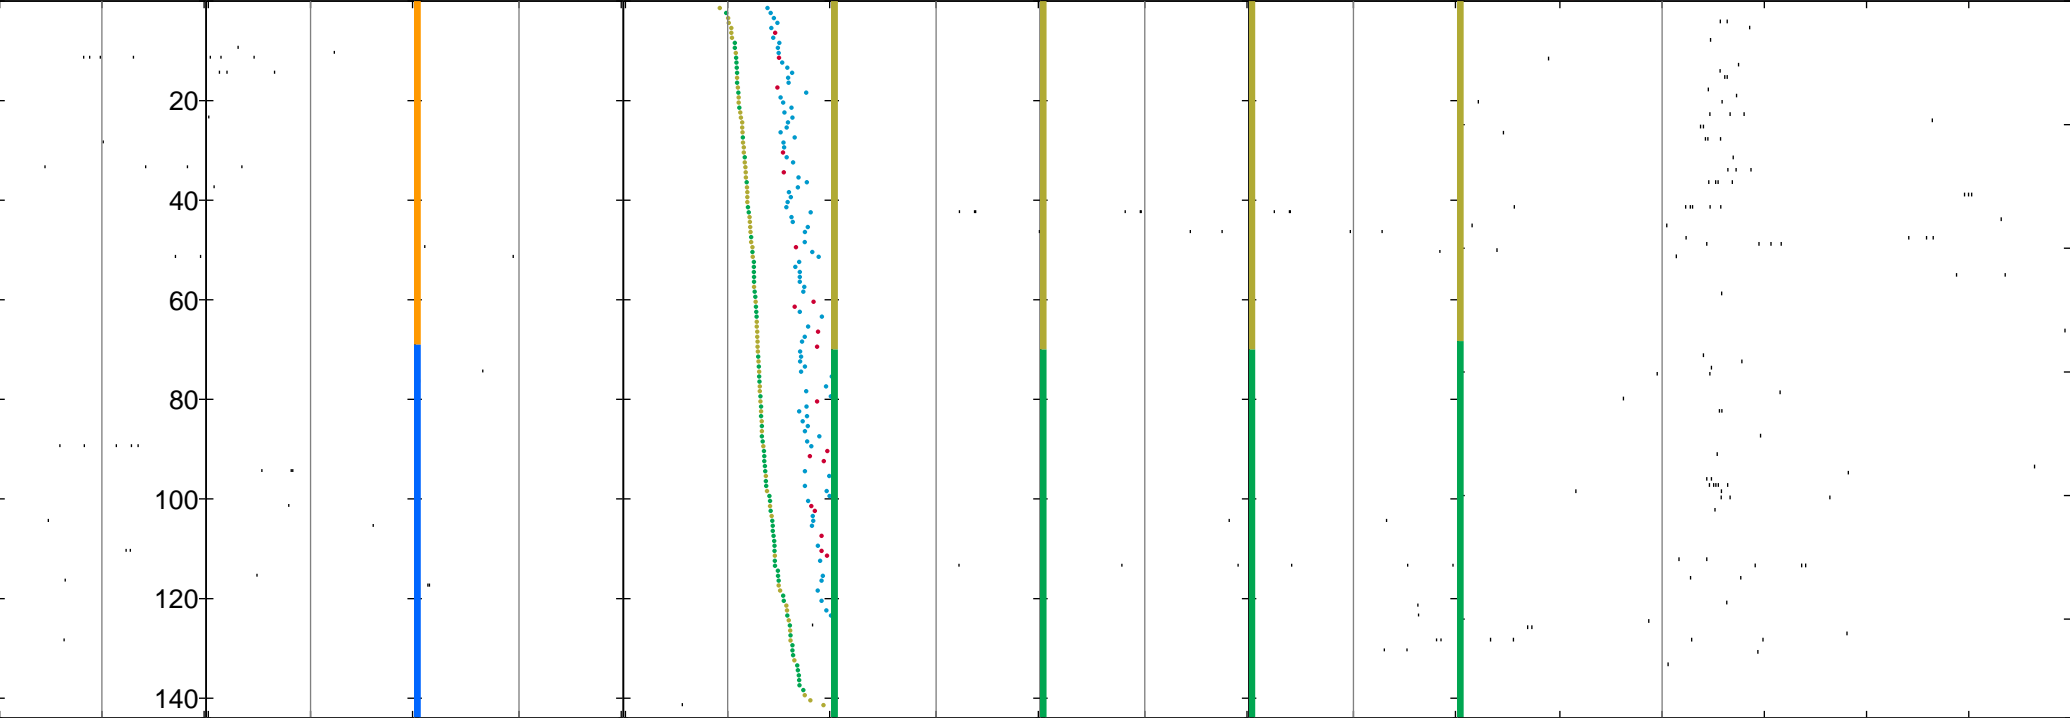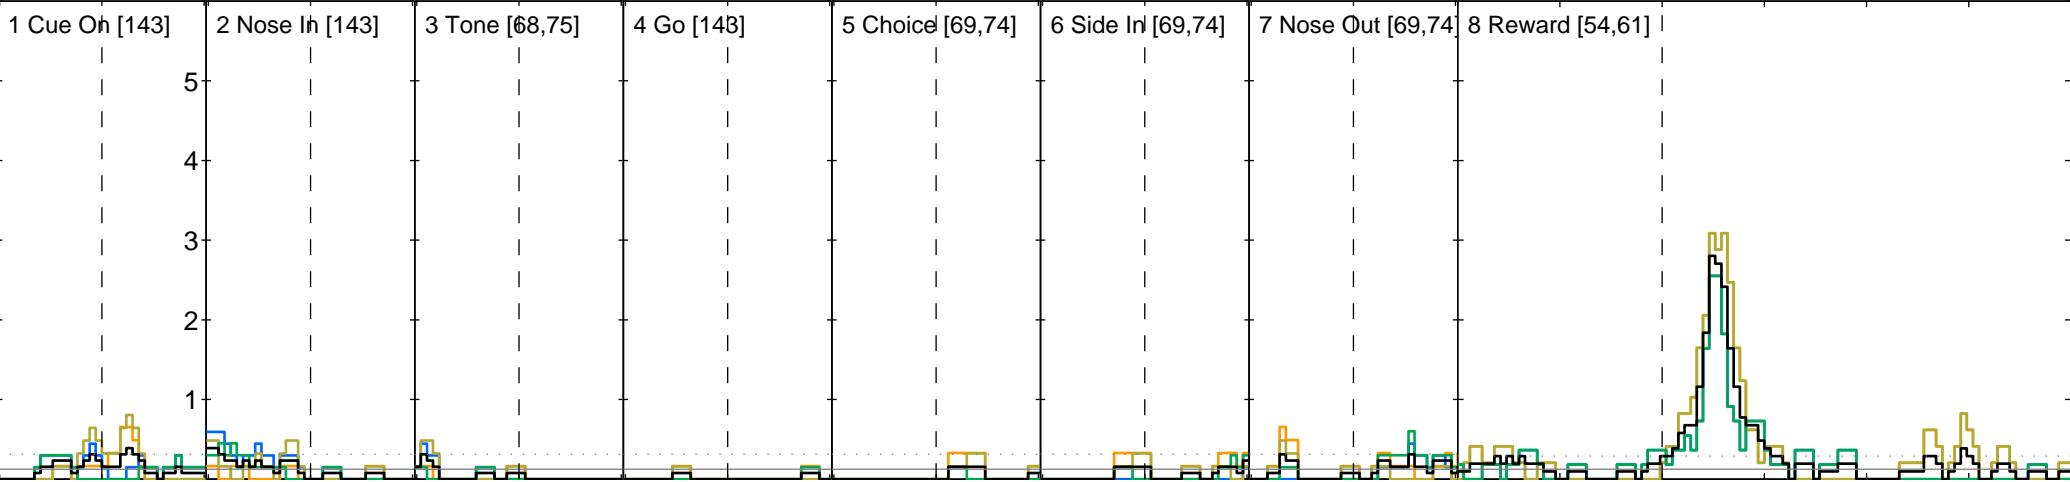

**Cell: C0320070624T11d**

AP: -0.96 ML: 3.7 DV: 6.1  
w: 4 n: 194  $P_{ISI>2}$ : 0.99  
1/2pw: 248 $\mu$ s p->v: 955 $\mu$ s  
 $\beta_T$ : NaN  $\beta_D$ : NaN  
 $\beta_P$ : NaN SI: NaN  
Session FR: 0.071 Hz  
Pk Ev: None  
Pk FR: --

**MSN**

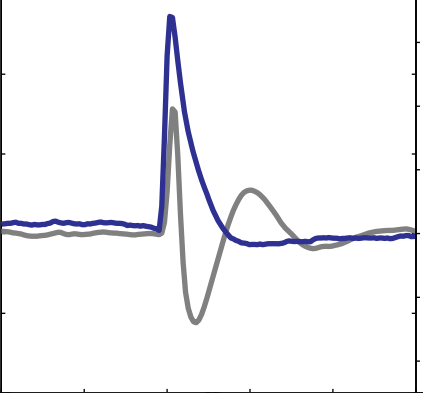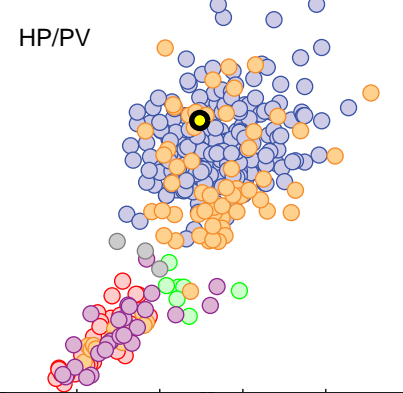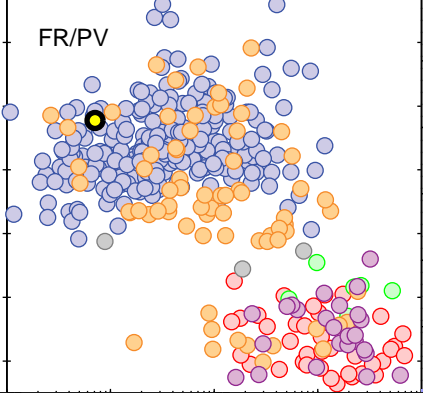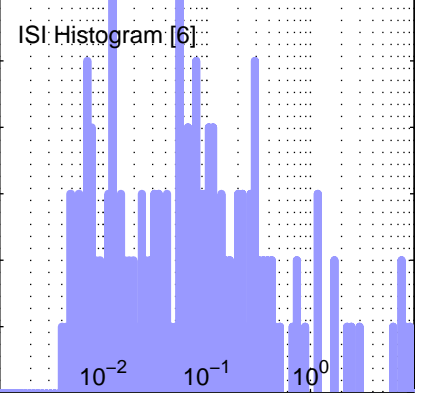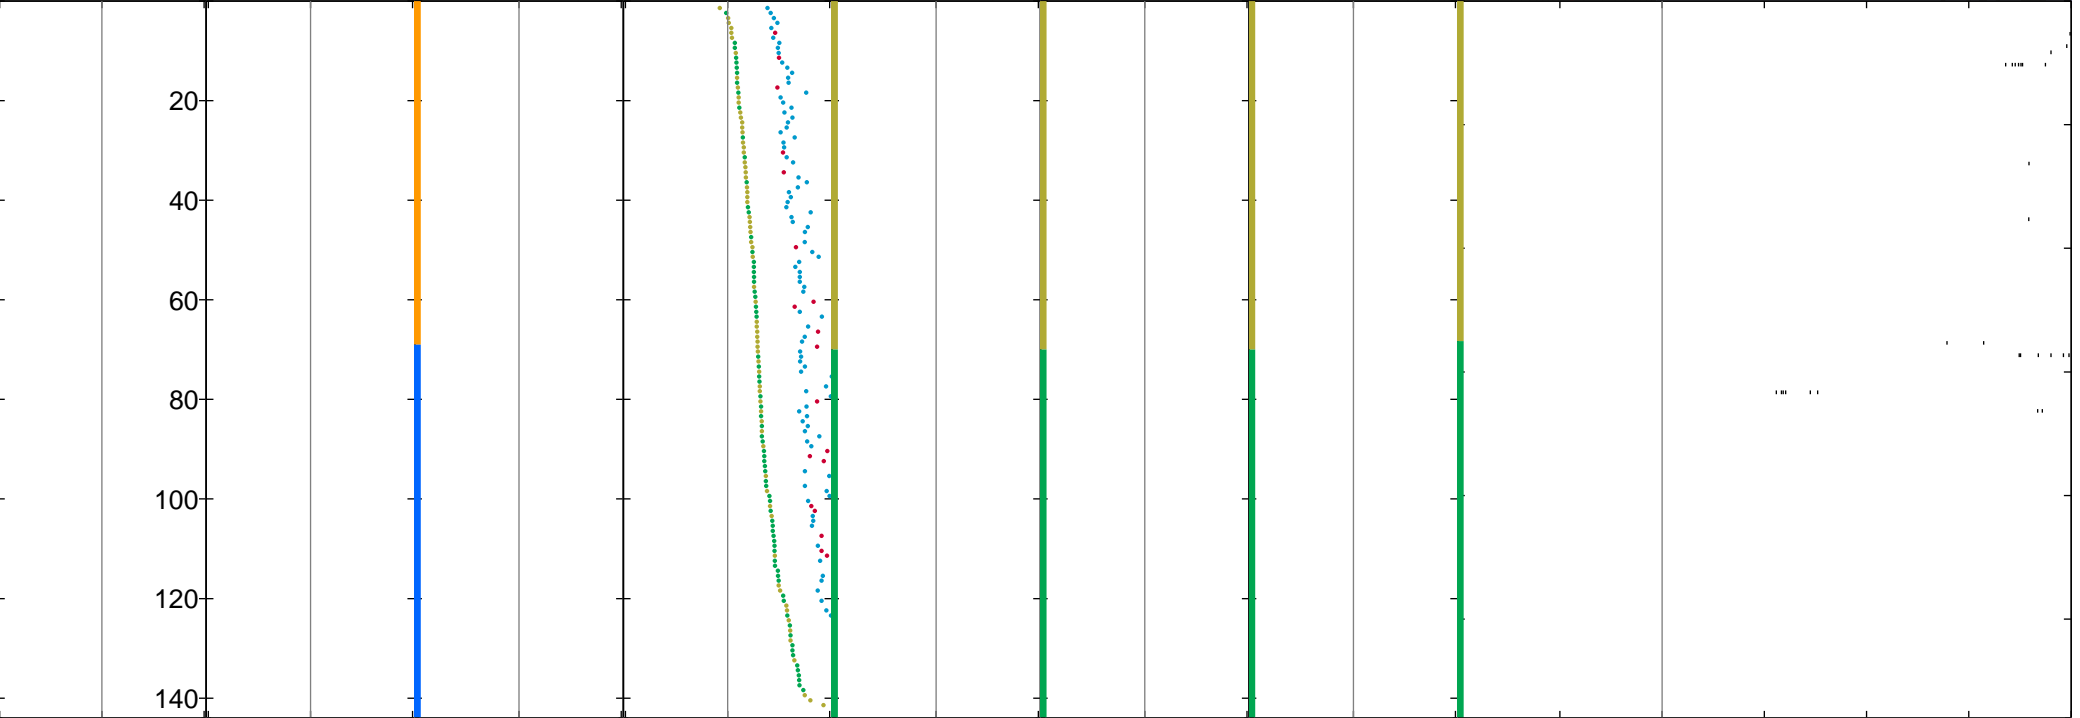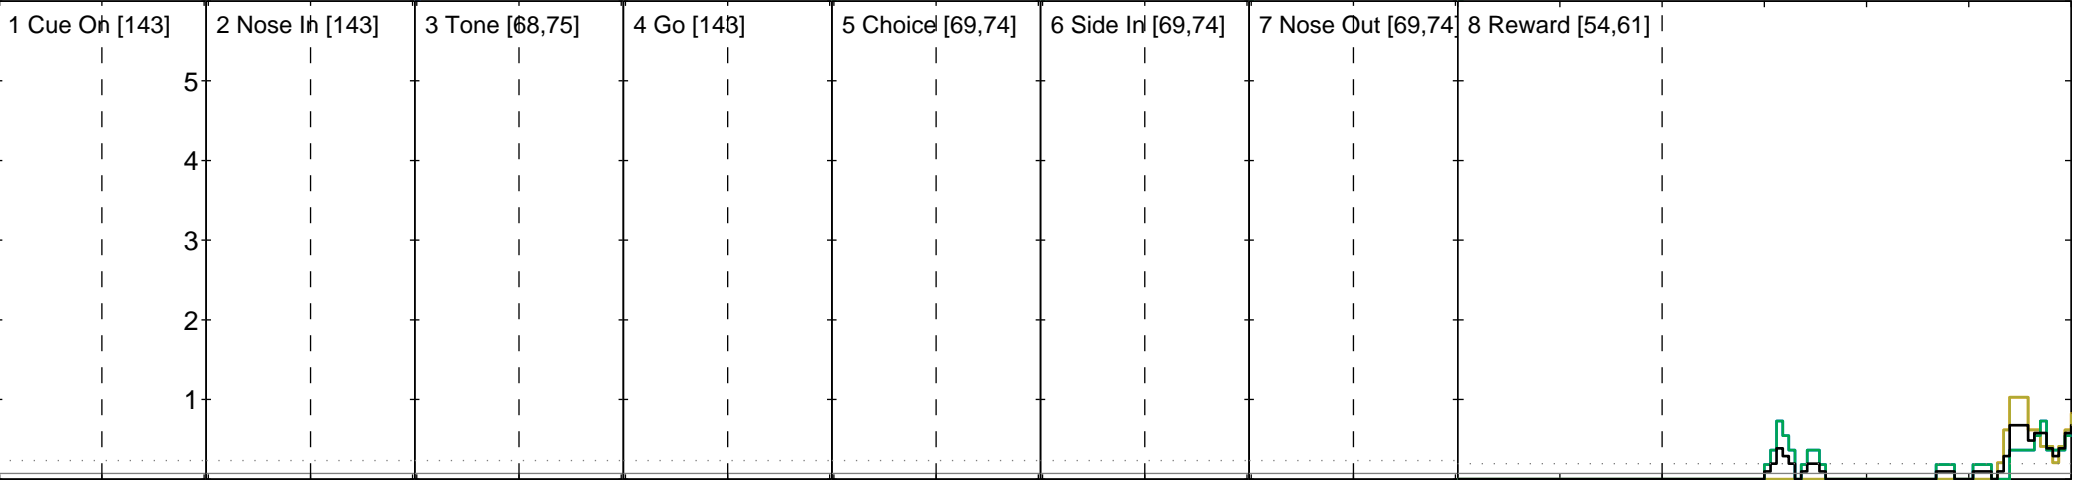

**Cell: C0320070624T11g**

AP: -0.96 ML: 3.7 DV: 6.1  
w: 2 n: 181  $P_{ISI>2}$ : 1  
1/2pw: 232 $\mu$ s p->v: 583 $\mu$ s  
 $\beta_T$ : NaN  $\beta_D$ : NaN  
 $\beta_P$ : NaN SI: NaN  
Session FR: 0.0494 Hz  
Pk Ev: None  
Pk FR: --

**MSN**

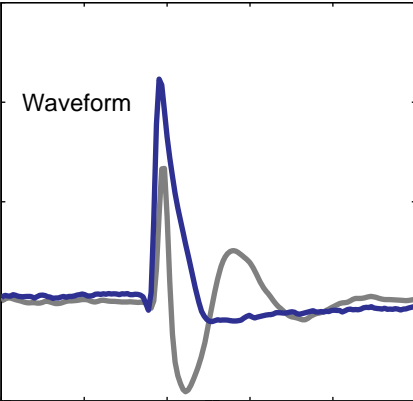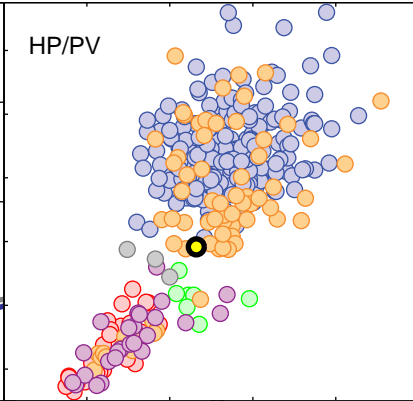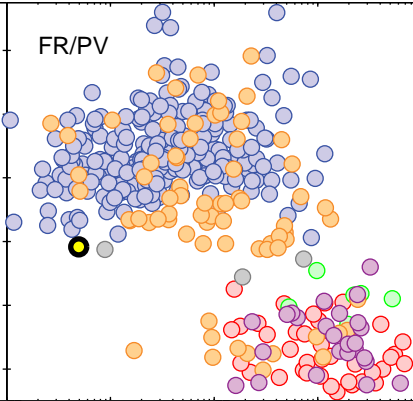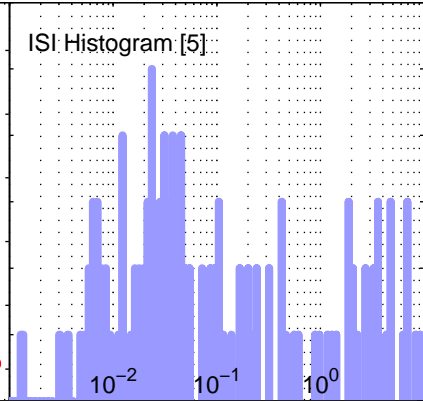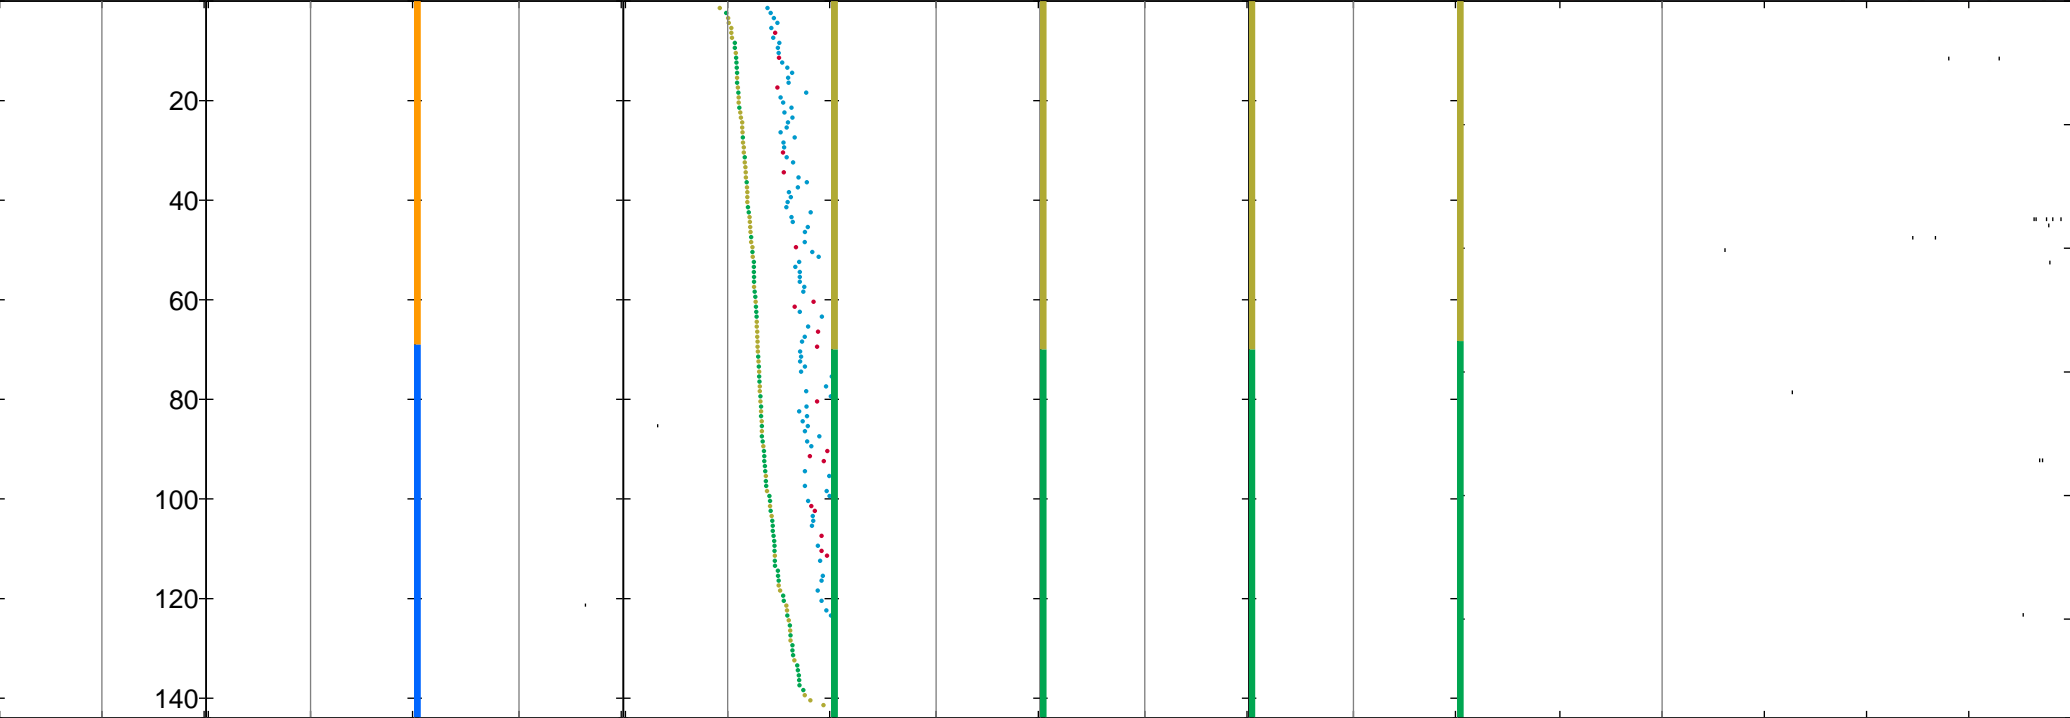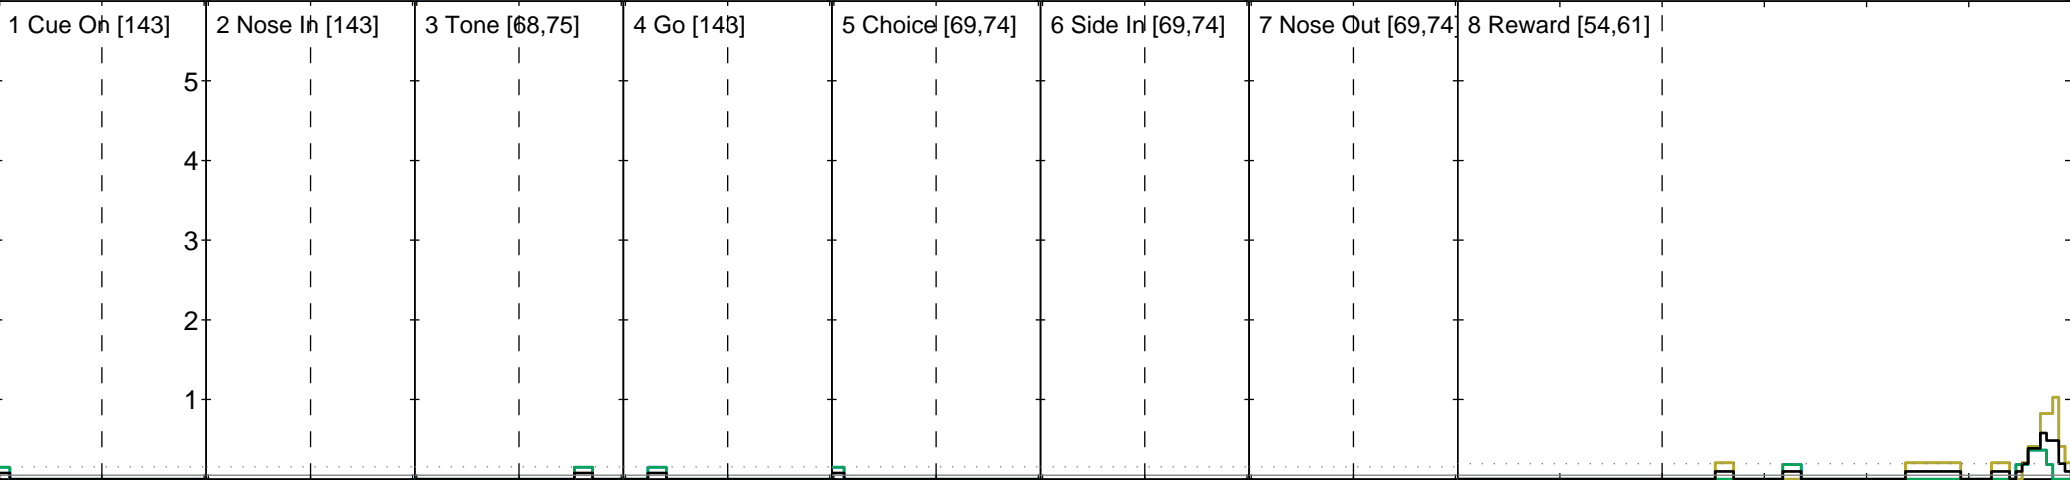

**Cell: C0320070625T06a**

AP: 1.7 ML: 1.3 DV: 7  
w: 3 n: 2120  $P_{ISI>2}$ : 0.93  
1/2pw: 230 $\mu$ s p->v: 837 $\mu$ s  
 $\beta_T$ : NaN  $\beta_D$ : NaN  
 $\beta_P$ : NaN SI: NaN  
Session FR: 0.483 Hz  
Pk Ev: None  
Pk FR: --

MSN

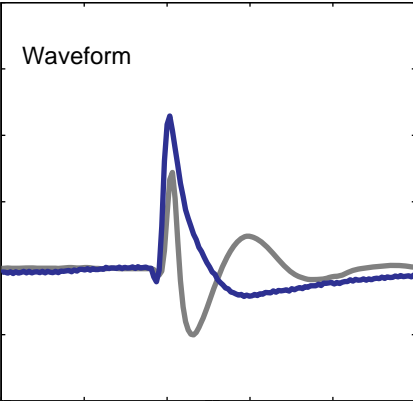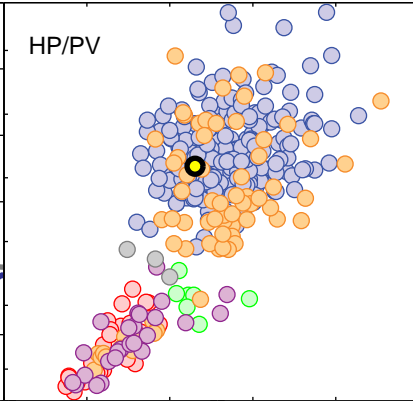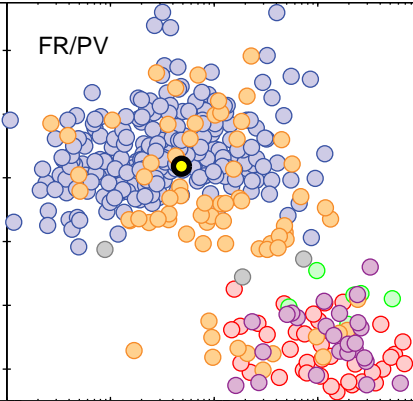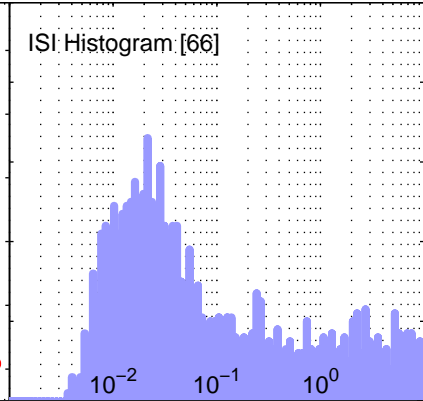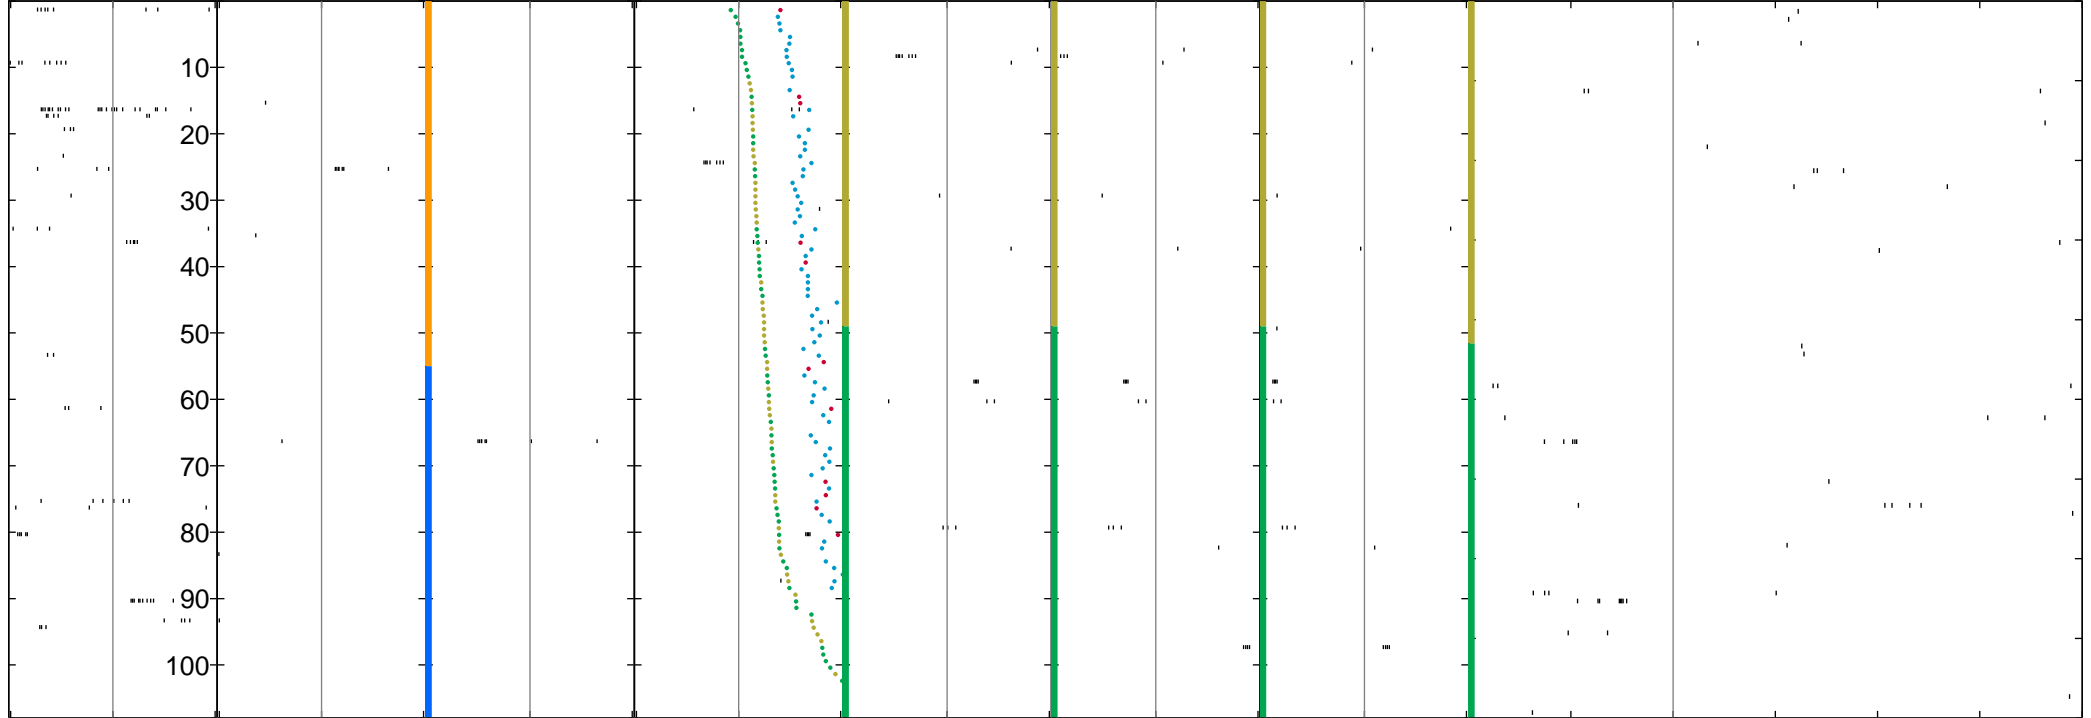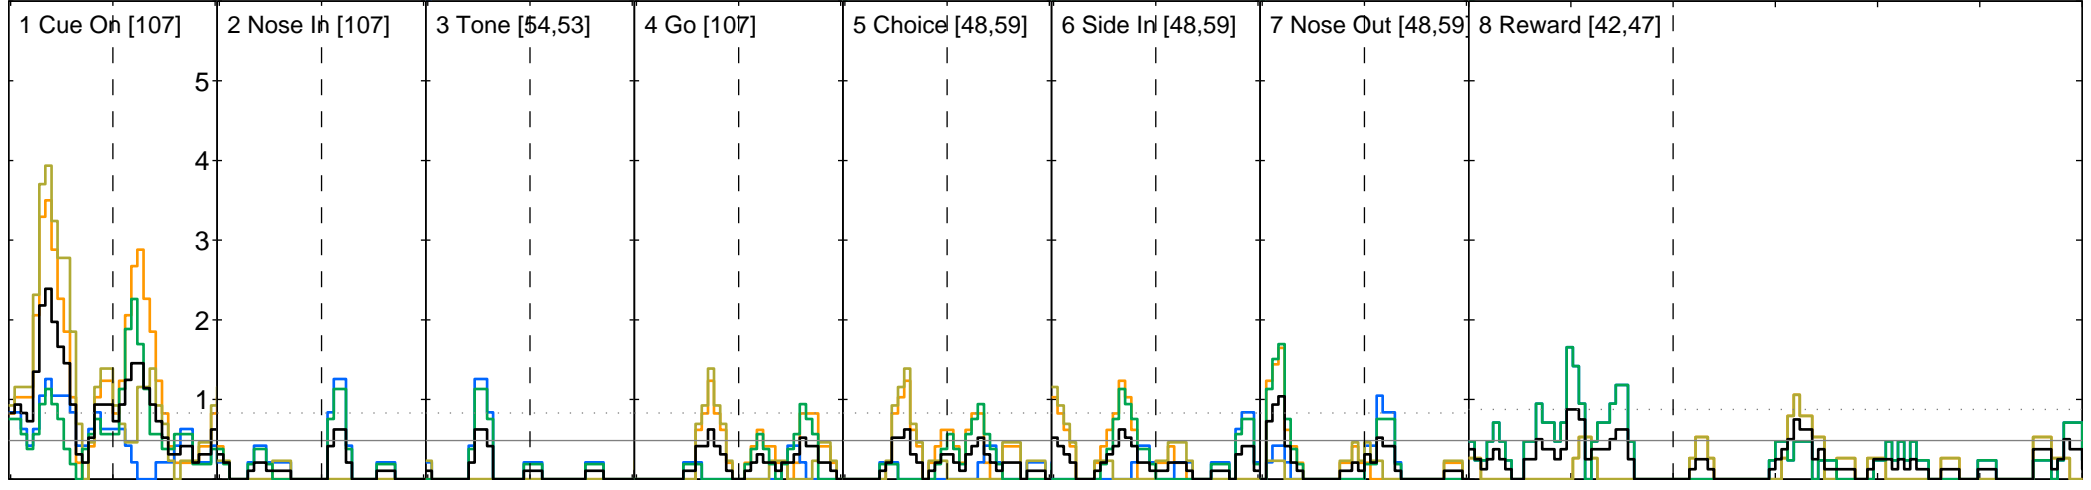

**Cell: C0320070625T07a**

AP: 0.96 ML: 3.6 DV: 6.6  
w: 3 n: 556  $P_{ISI>2}$ : 0.97  
1/2pw: 189 $\mu$ s p->v: 840 $\mu$ s  
 $\beta_T$ : NaN  $\beta_D$ : NaN  
 $\beta_P$ : NaN SI: NaN  
Session FR: 0.162 Hz  
Pk Ev: None  
Pk FR: --

MSN

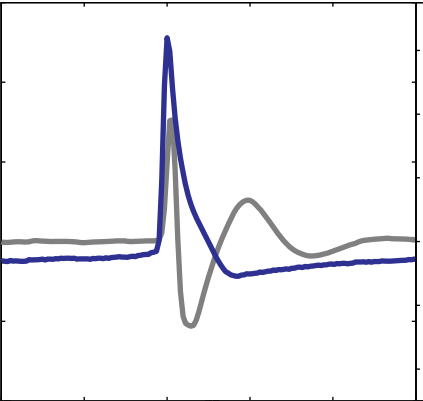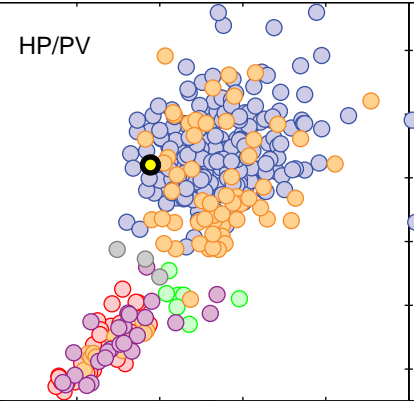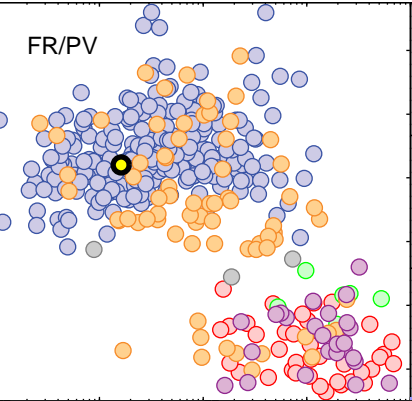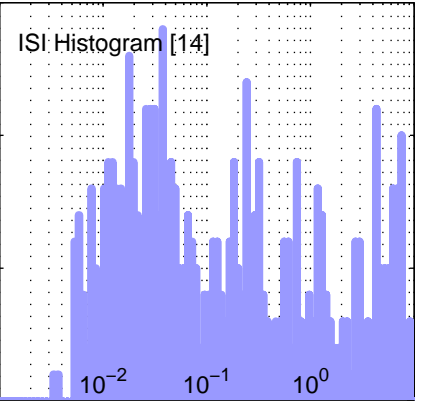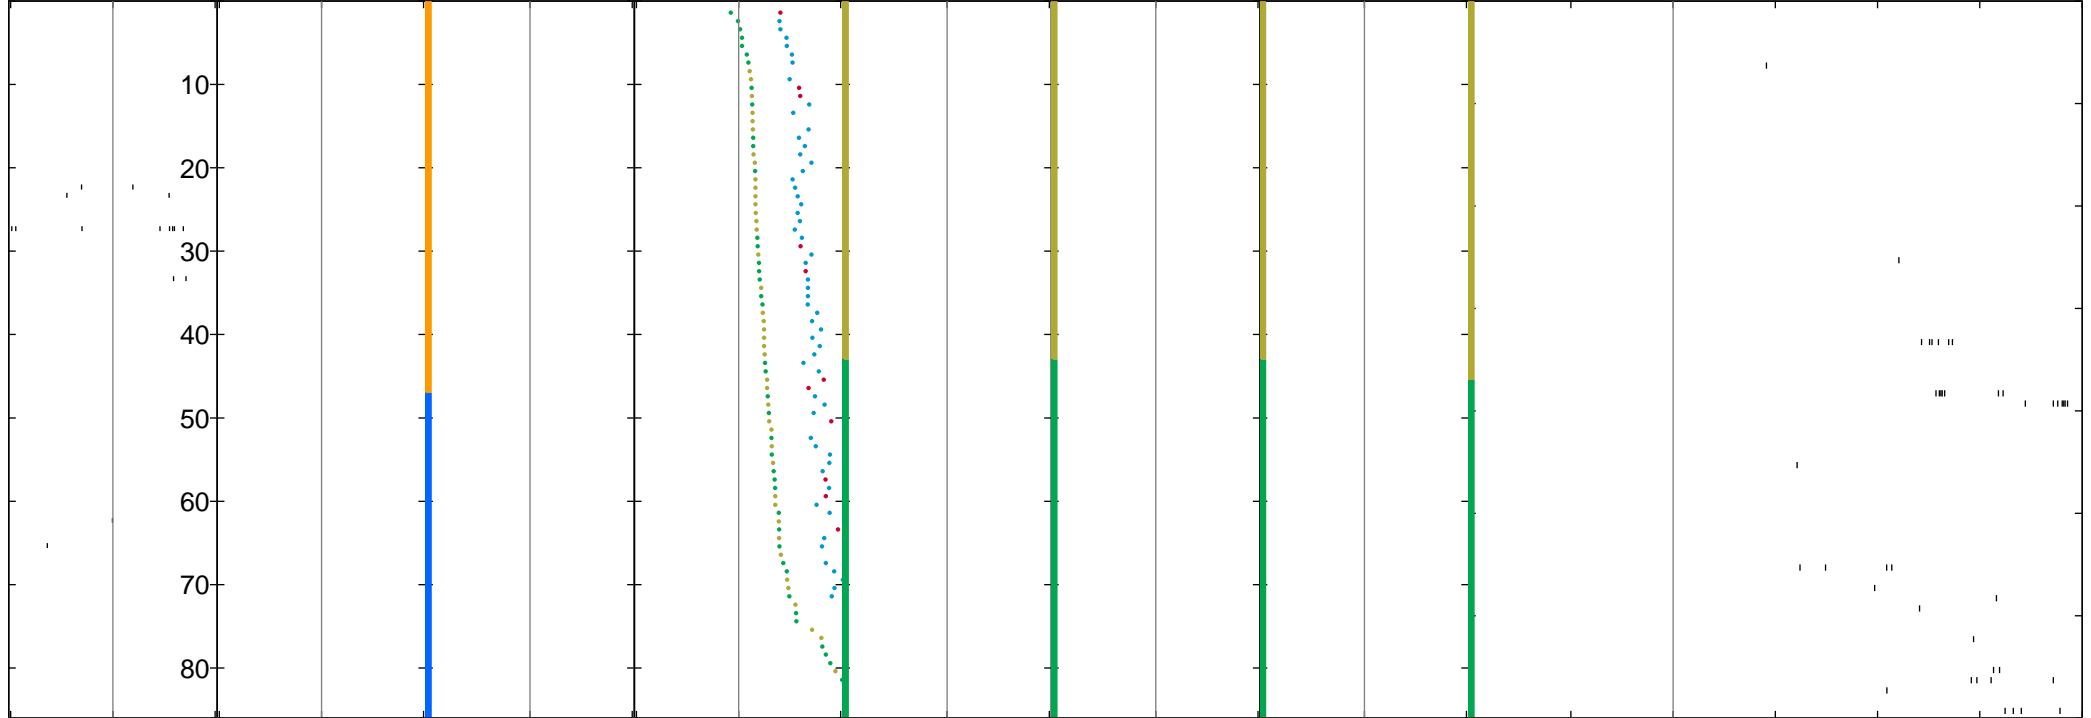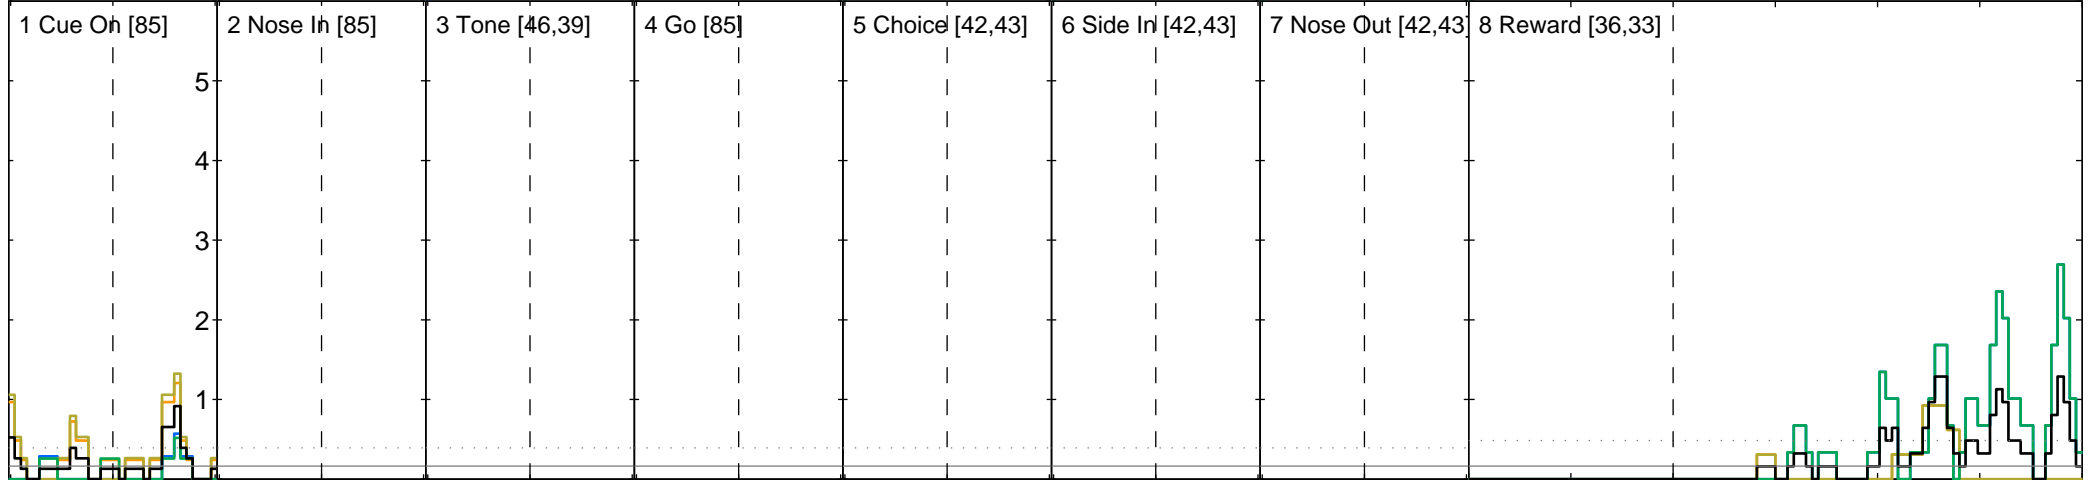

**Cell: C0320070625T07b**

AP: 0.96 ML: 3.6 DV: 6.6  
w: 3 n: 3246  $P_{ISI>2}$ : 0.81  
1/2pw: 230 $\mu$ s p $\rightarrow$ v: 750 $\mu$ s  
 $\beta_T$ : NaN  $\beta_D$ : NaN  
 $\beta_P$ : NaN SI: NaN  
Session FR: 0.928 Hz  
Pk Ev: None  
Pk FR: --

MSN

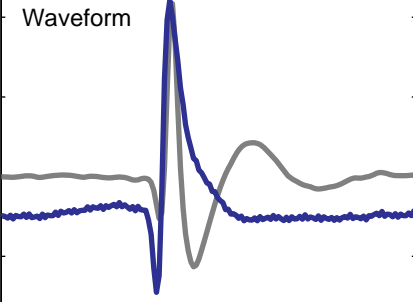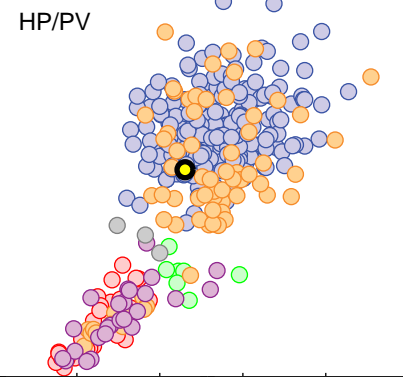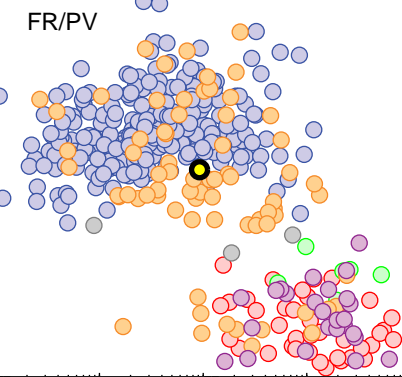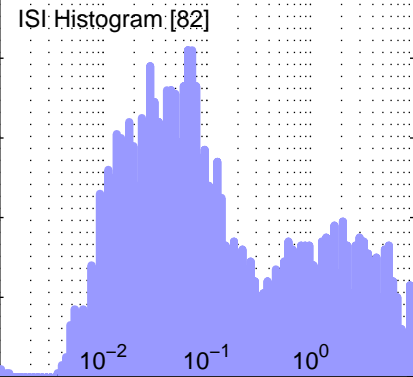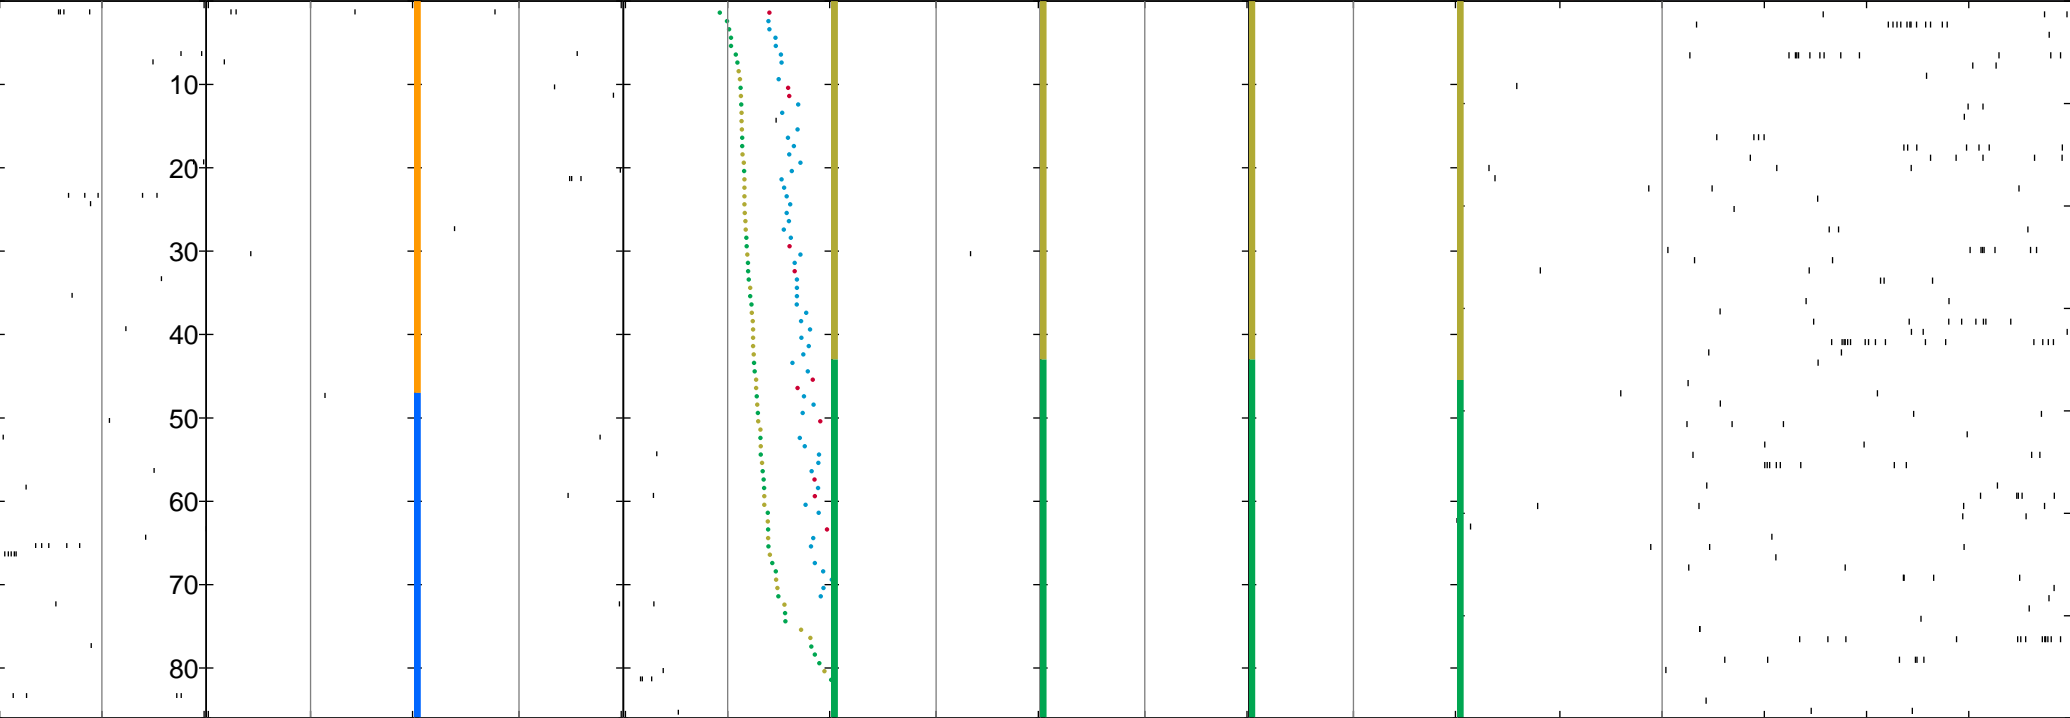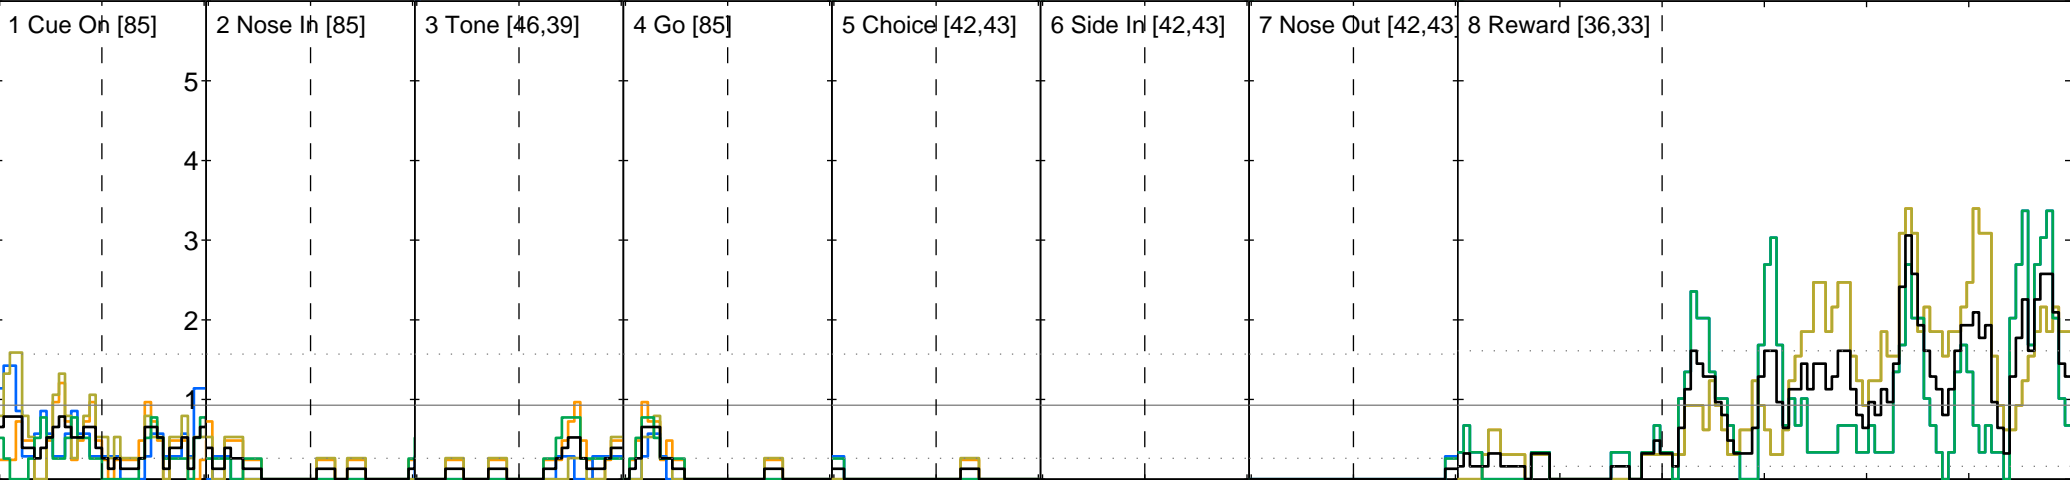

**Cell: C0320070625T09b**

AP: 1.6 ML: 3.7 DV: 5.5  
w: 1 n: 1382  $P_{ISI>2}$ : 0.94  
1/2pw: 219 $\mu$ s p->v: 918 $\mu$ s  
 $\beta_T$ : NaN  $\beta_D$ : NaN  
 $\beta_P$ : NaN SI: NaN  
Session FR: 0.313 Hz  
Pk Ev: None  
Pk FR: --

MSN

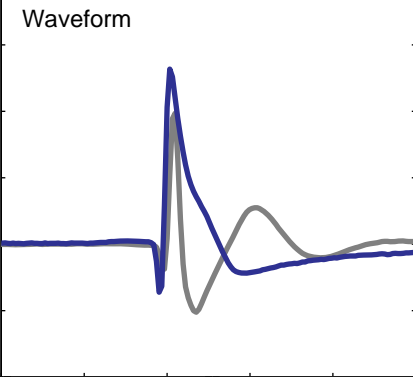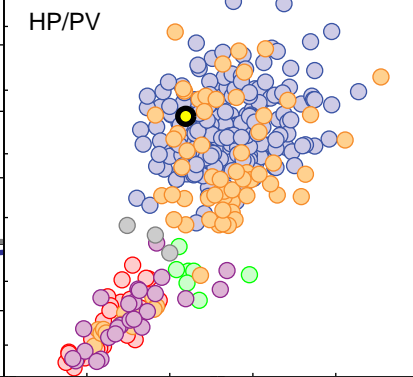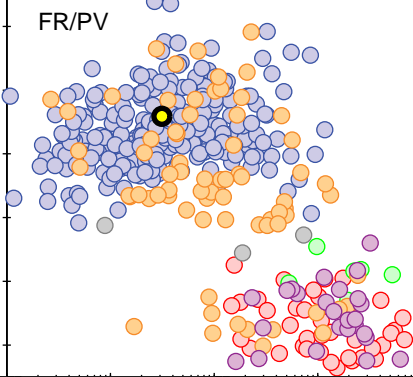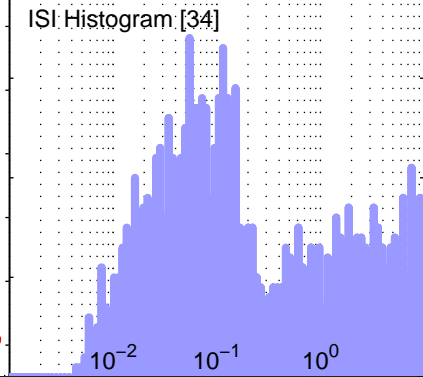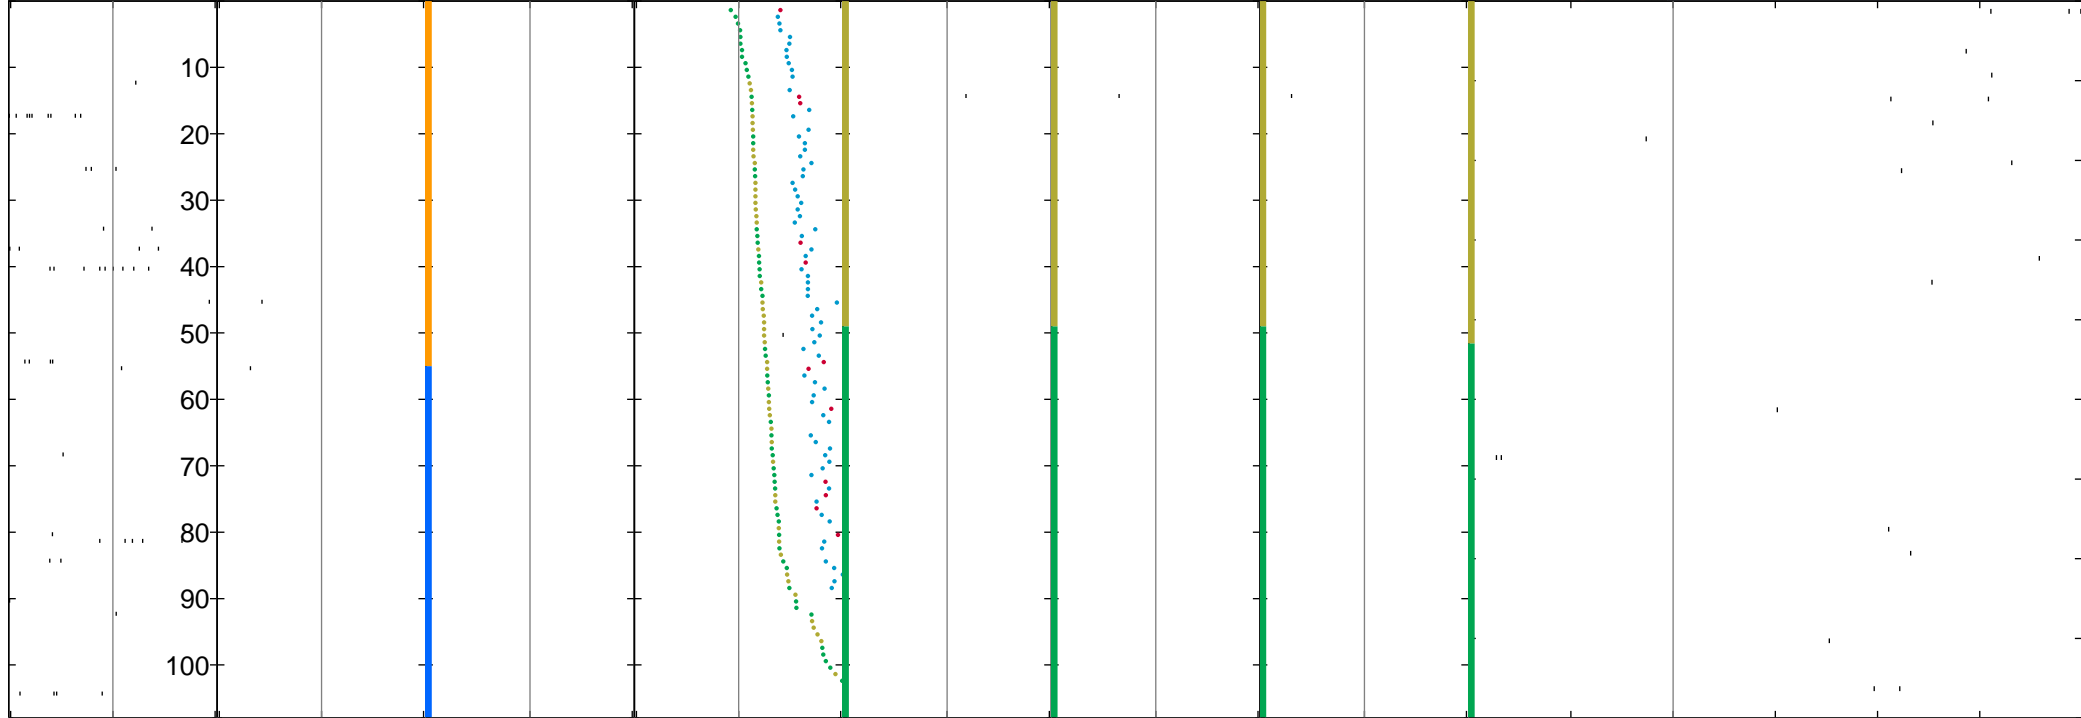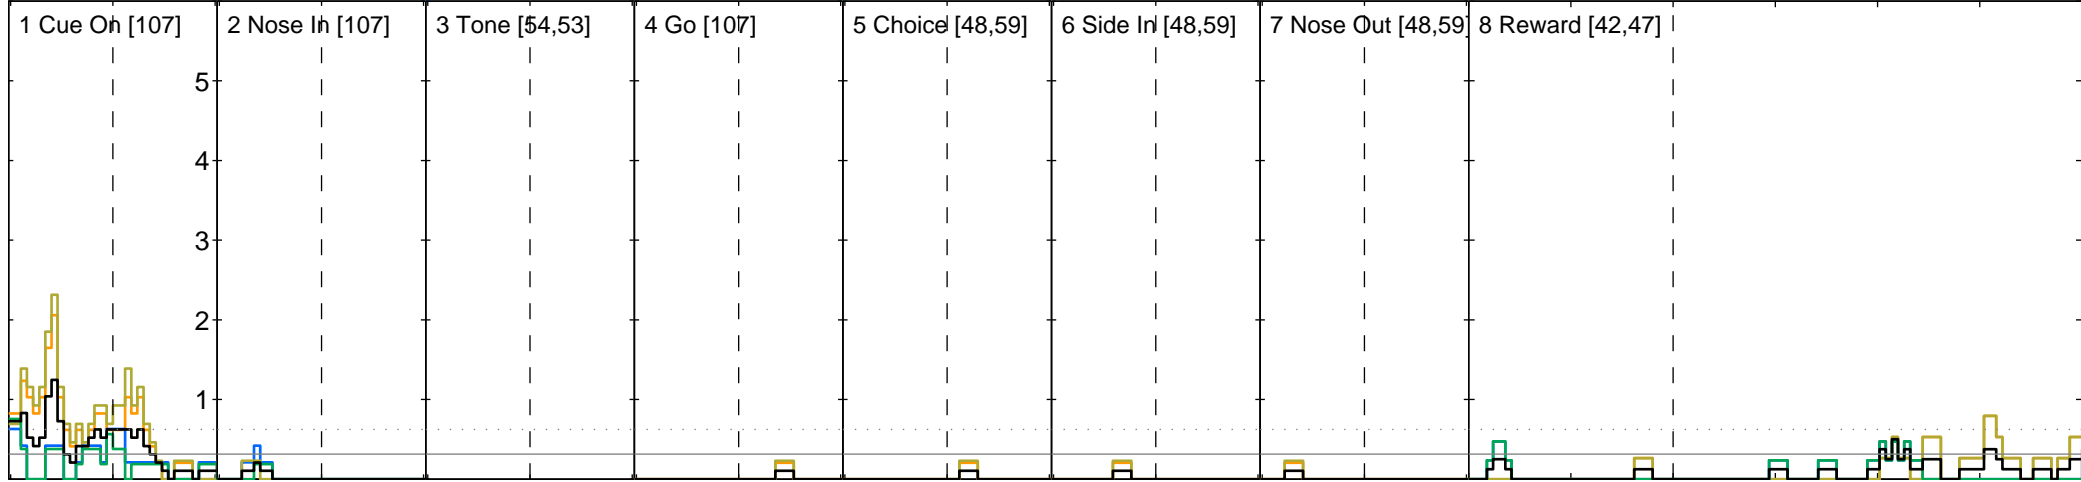

**Cell: C0320070625T09c**

AP: 1.6 ML: 3.7 DV: 5.5  
w: 2 n: 1887  $P_{ISI>2}$ : 0.88  
1/2pw: 323 $\mu$ s p->v: 829 $\mu$ s  
 $\beta_T$ : NaN  $\beta_D$ : NaN  
 $\beta_P$ : NaN SI: NaN  
Session FR: 0.427 Hz  
Pk Ev: None  
Pk FR: --

**MSN**

Waveform

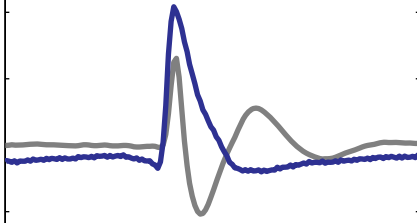

HP/PV

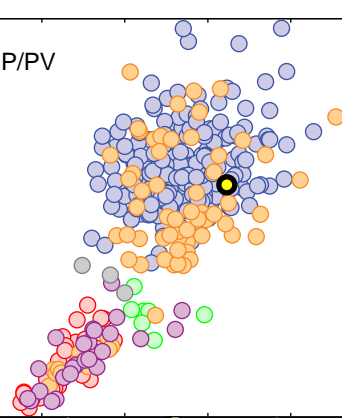

FR/PV

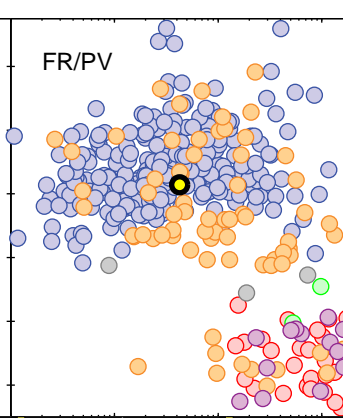

ISI Histogram [39]

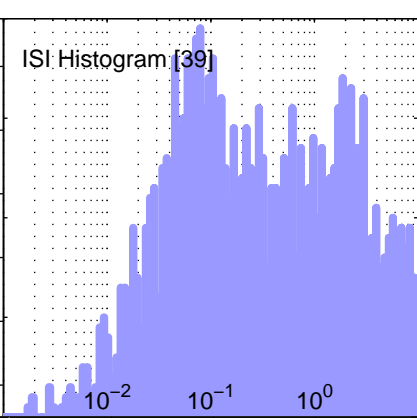

10  
20  
30  
40  
50  
60  
70  
80  
90  
100

1 Cue On [107]

2 Nose In [107]

3 Tone [54,53]

4 Go [107]

5 Choice [48,59]

6 Side In [48,59]

7 Nose Out [48,59]

8 Reward [42,47]

5  
4  
3  
2  
1

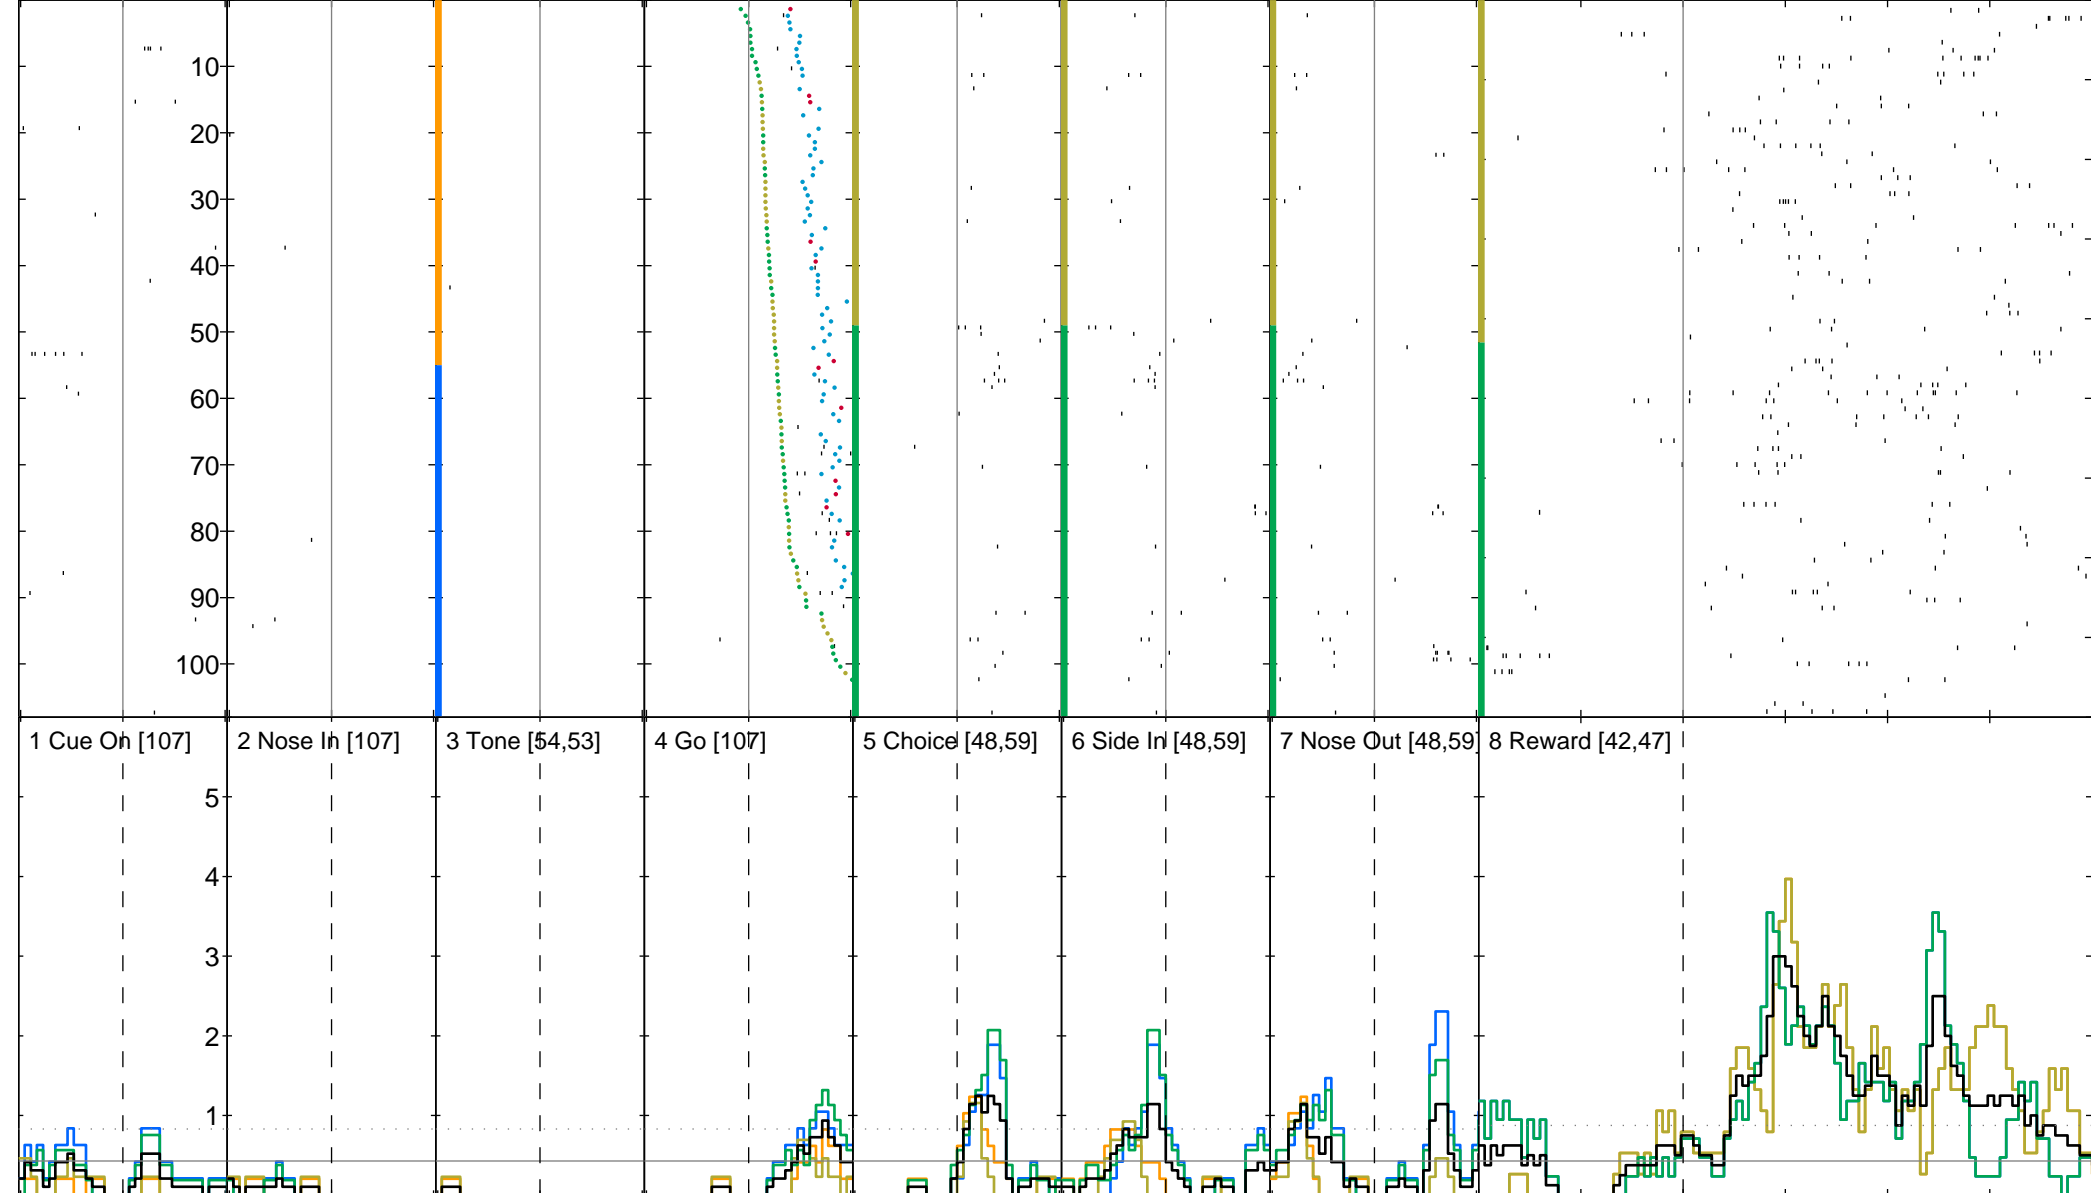



**Cell: C0320070625T09d**

AP: 1.6 ML: 3.7 DV: 5.5  
w: 4 n: 203  $P_{ISI>2}$ : 1  
1/2pw: 202 $\mu$ s p->v: 923 $\mu$ s  
 $\beta_T$ : NaN  $\beta_D$ : NaN  
 $\beta_P$ : NaN SI: NaN  
Session FR: 0.0492 Hz  
Pk Ev: None  
Pk FR: --

MSN

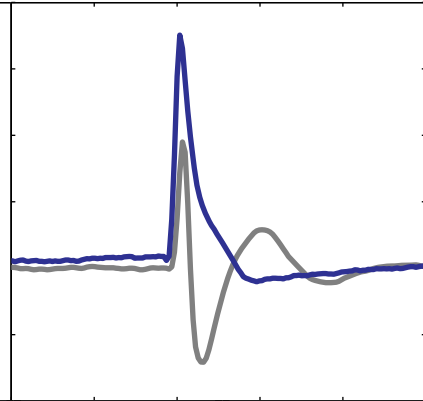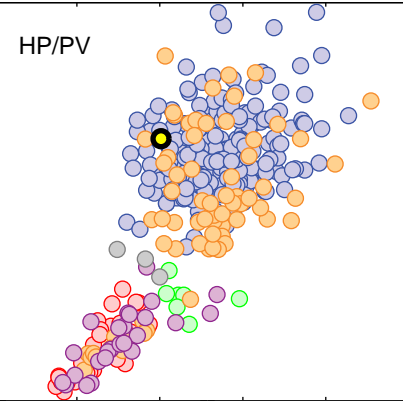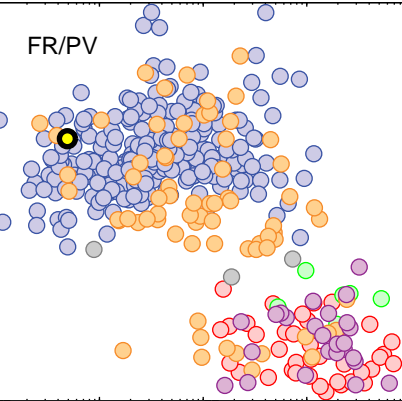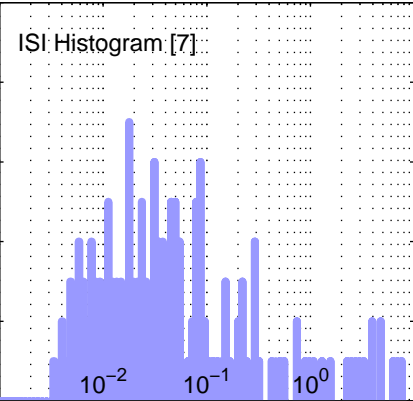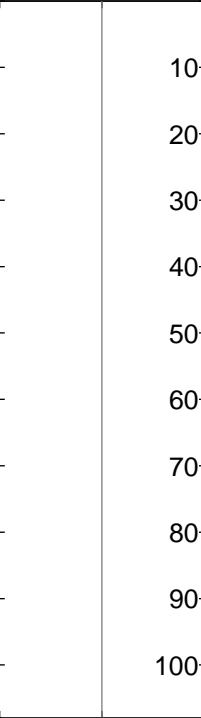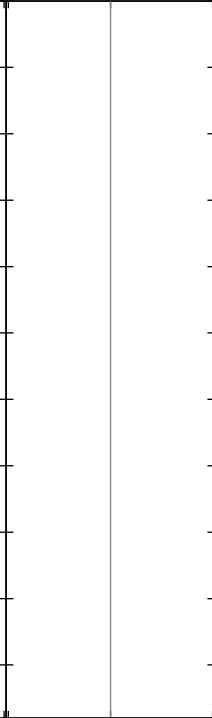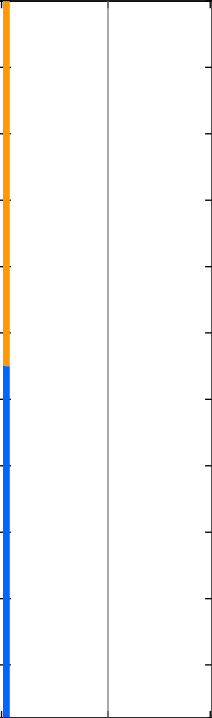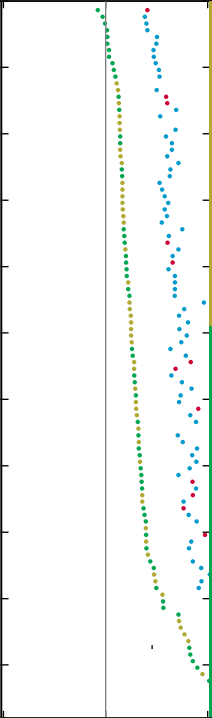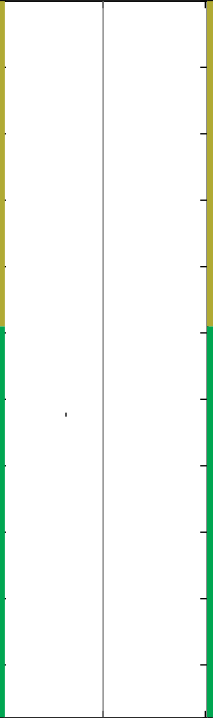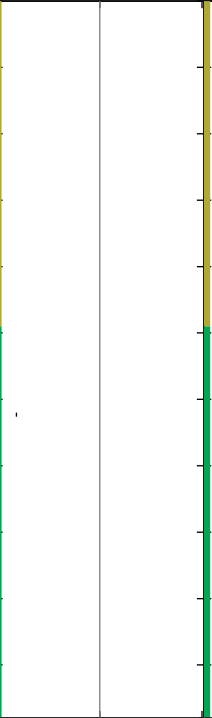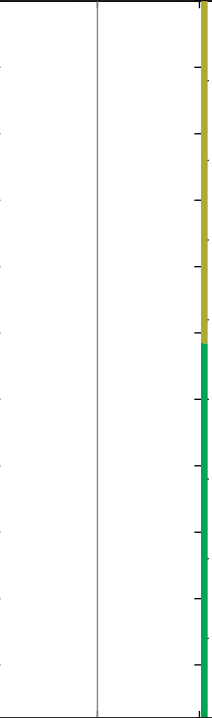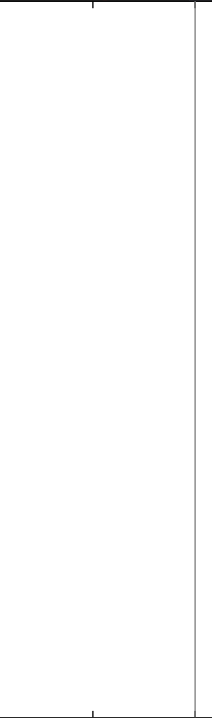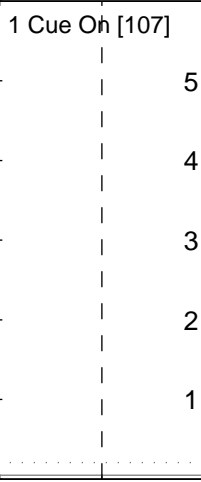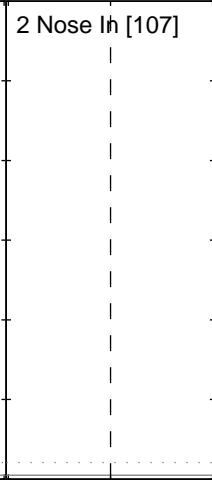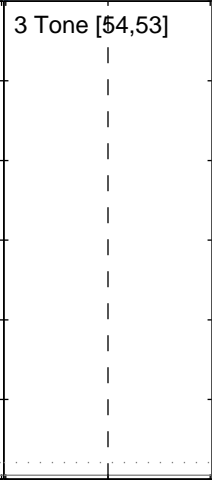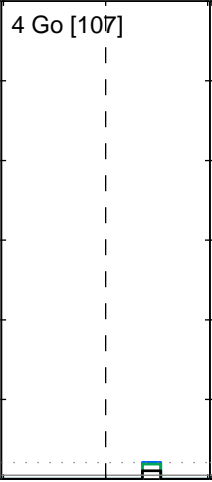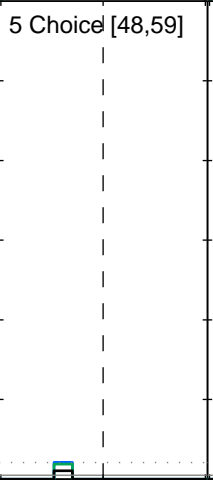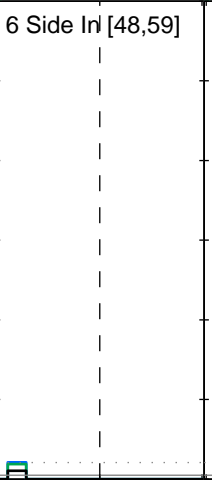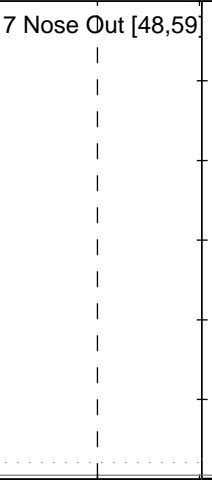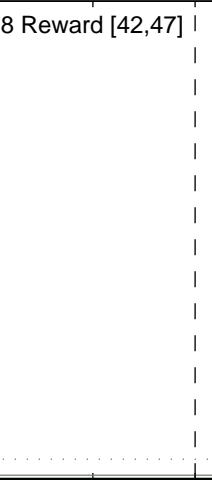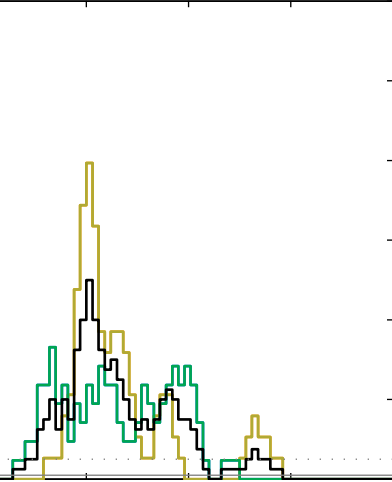

**Cell: C0320070625T09e**

AP: 1.6 ML: 3.7 DV: 5.5  
w: 4 n: 221  $P_{ISI>2}$ : 0.99  
1/2pw: 222 $\mu$ s p->v: 800 $\mu$ s  
 $\beta_T$ : NaN  $\beta_D$ : NaN  
 $\beta_P$ : NaN SI: NaN  
Session FR: 0.0529 Hz  
Pk Ev: None  
Pk FR: --

Waveform

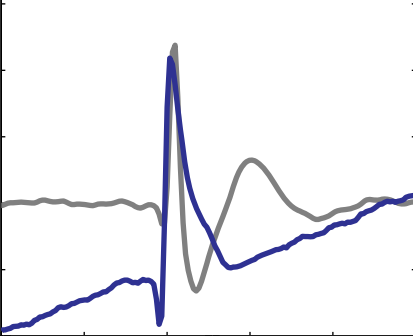

HP/PV

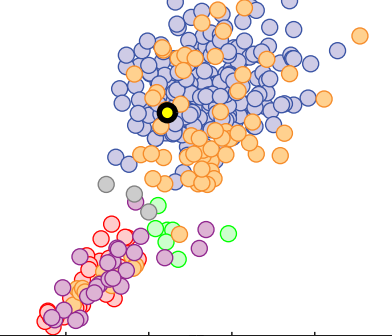

FR/PV

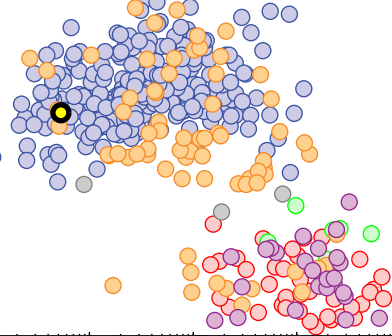

ISI Histogram [13]

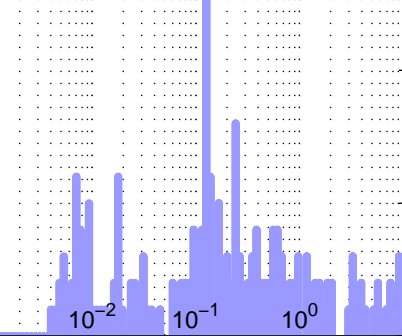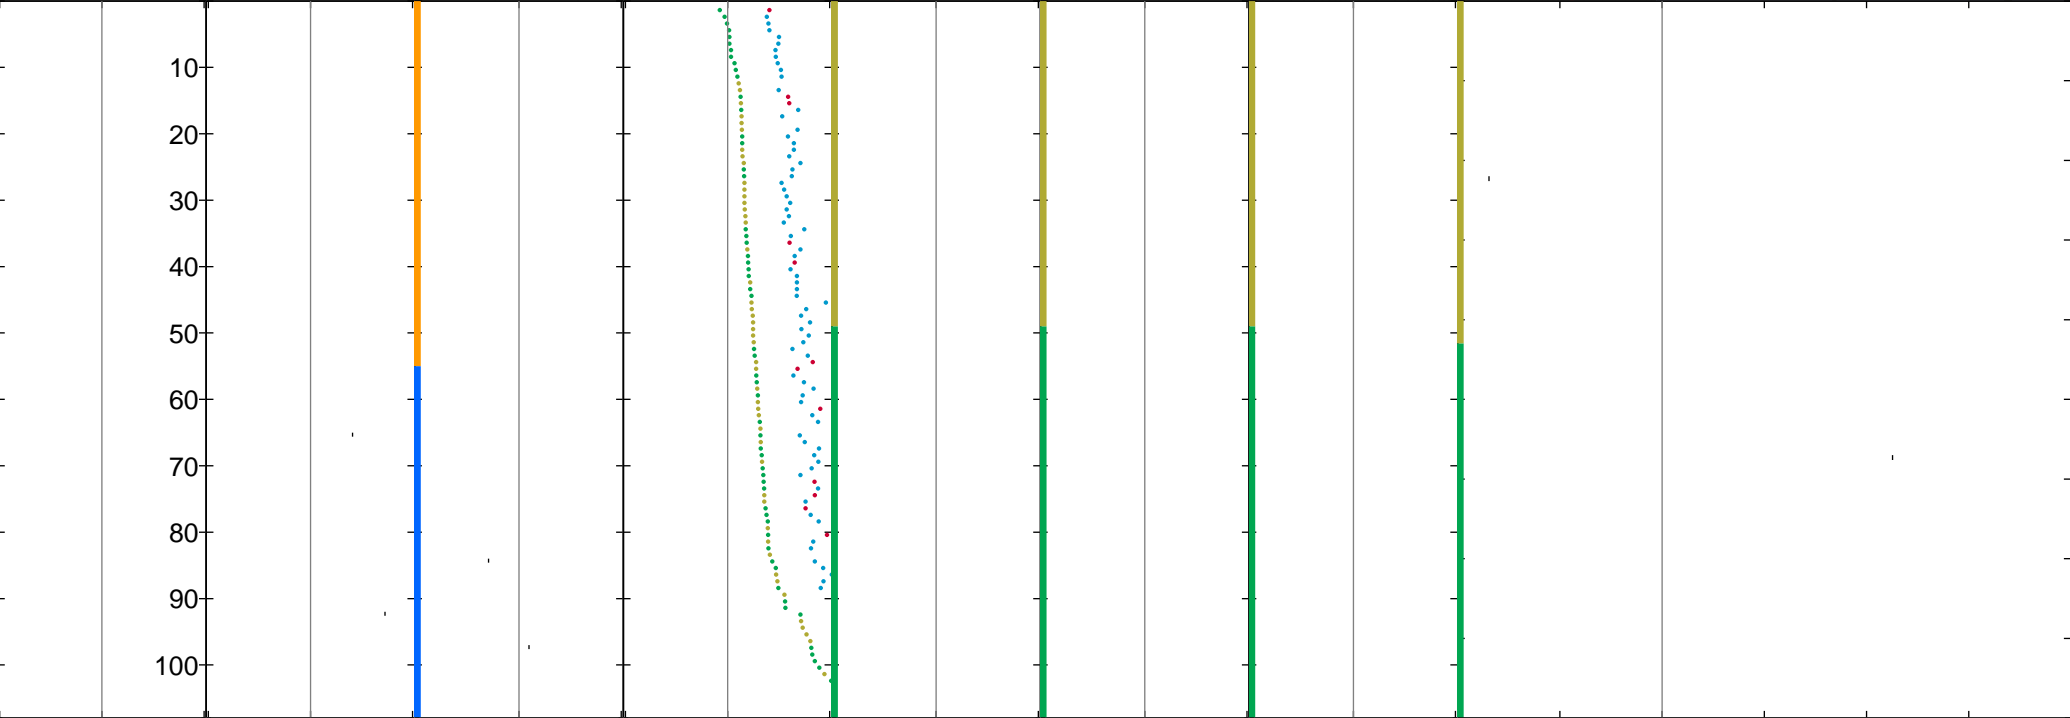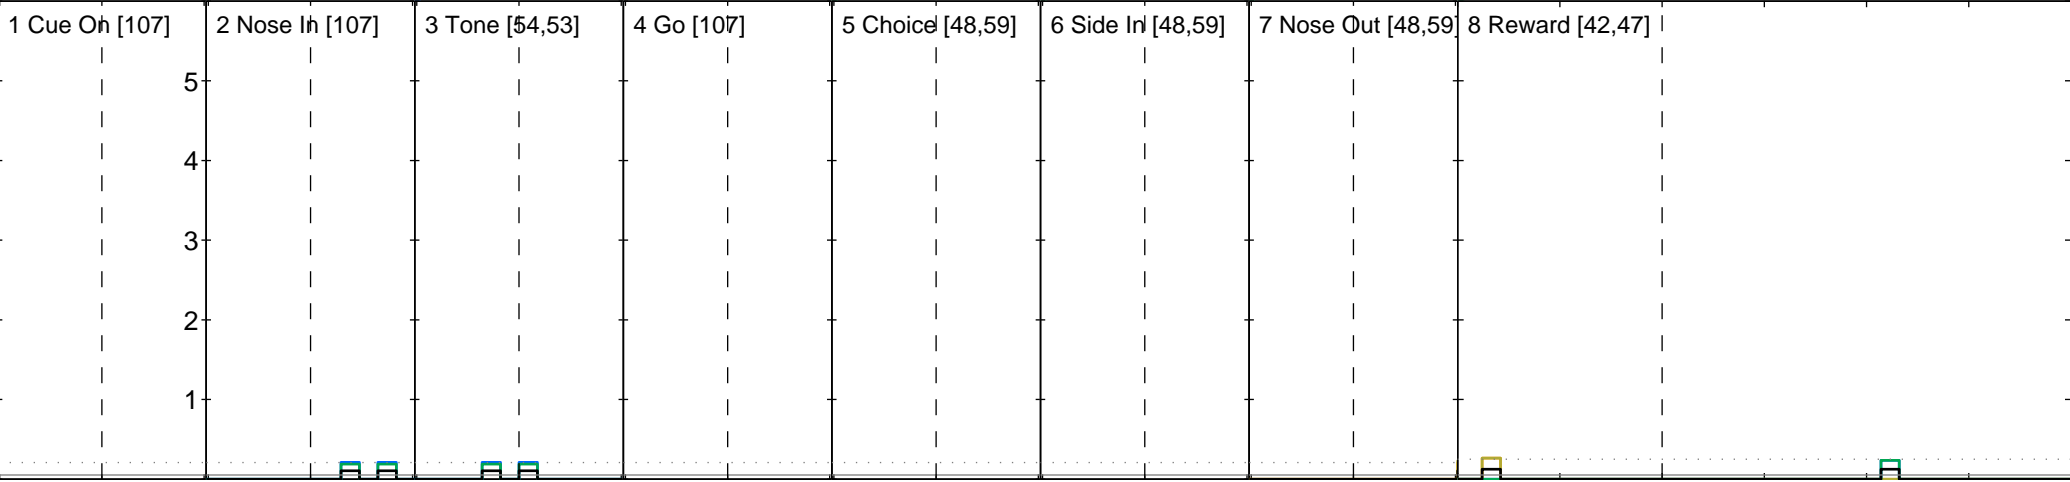

**Cell: C0320070625T09F**

AP: 1.6 ML: 3.7 DV: 5.5  
w: 3 n: 320  $P_{ISI>2}$ : 0.99  
1/2pw: 230 $\mu$ s p->v: 816 $\mu$ s  
 $\beta_T$ : NaN  $\beta_D$ : NaN  
 $\beta_P$ : NaN SI: NaN  
Session FR: 0.0726 Hz  
Pk Ev: None  
Pk FR: --

MSN

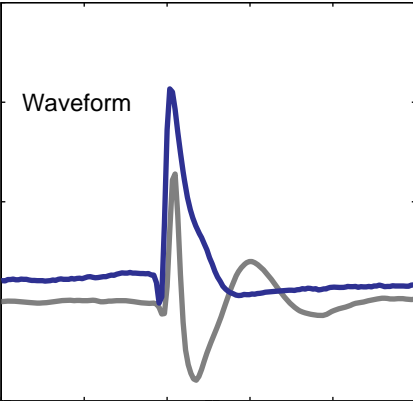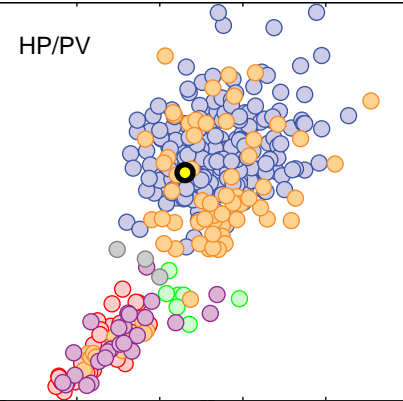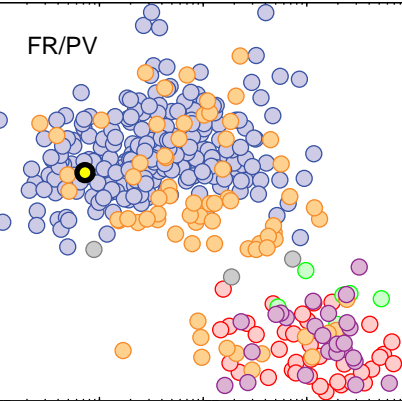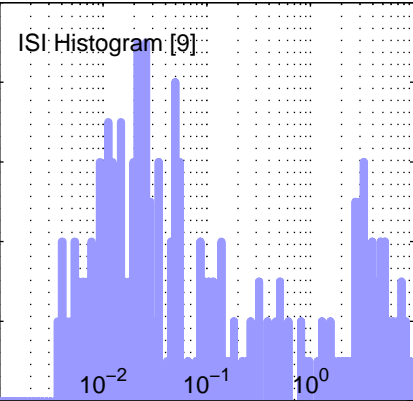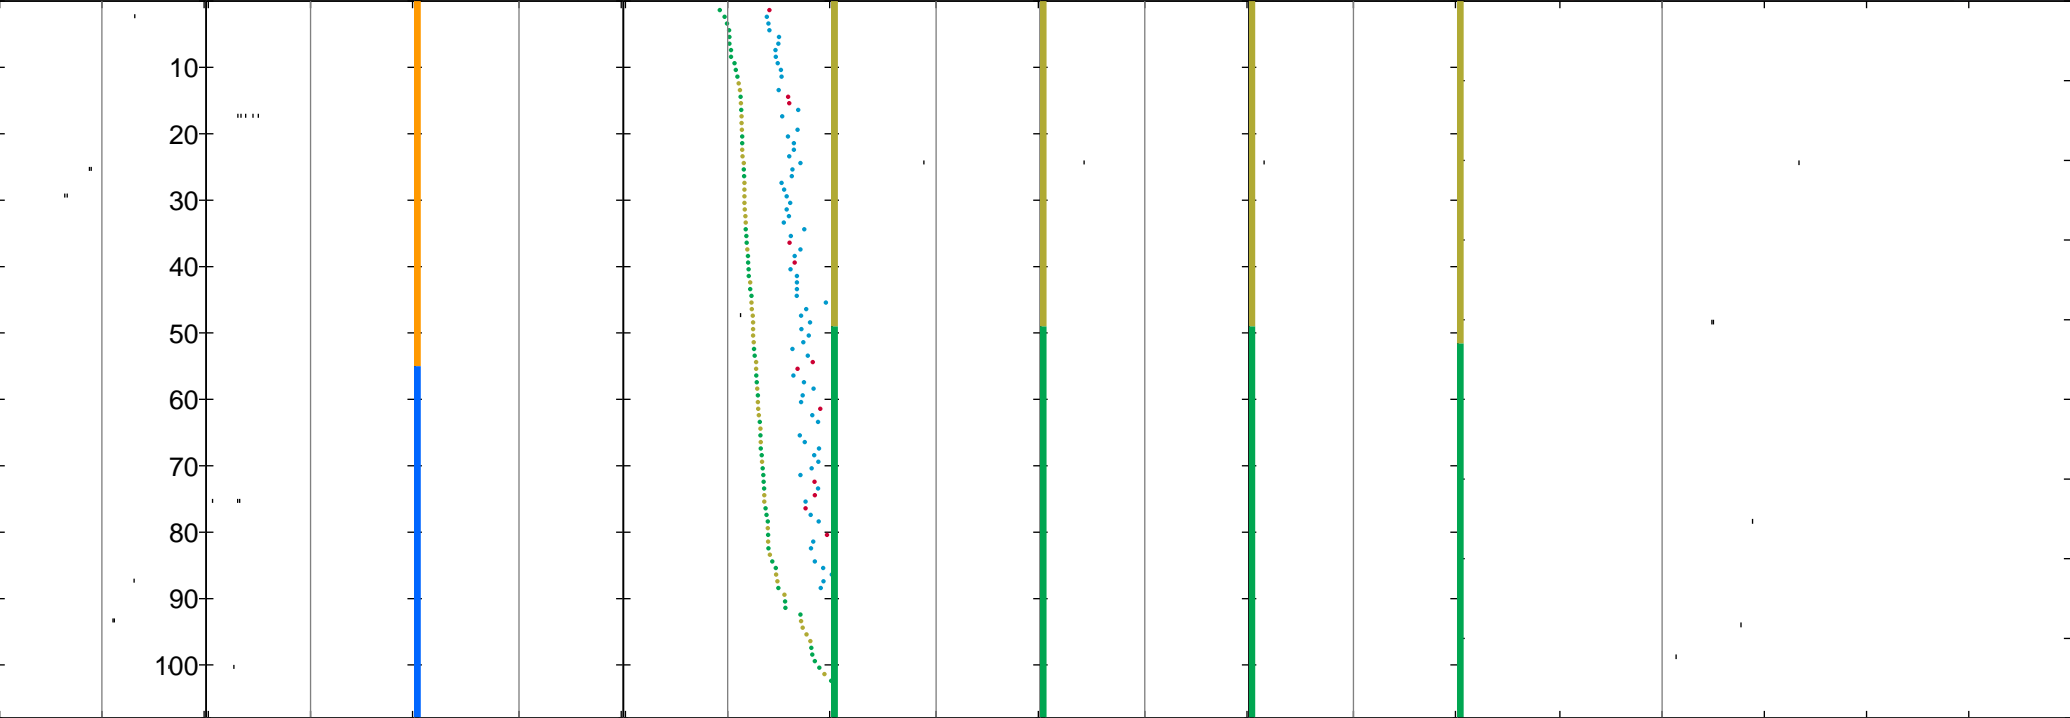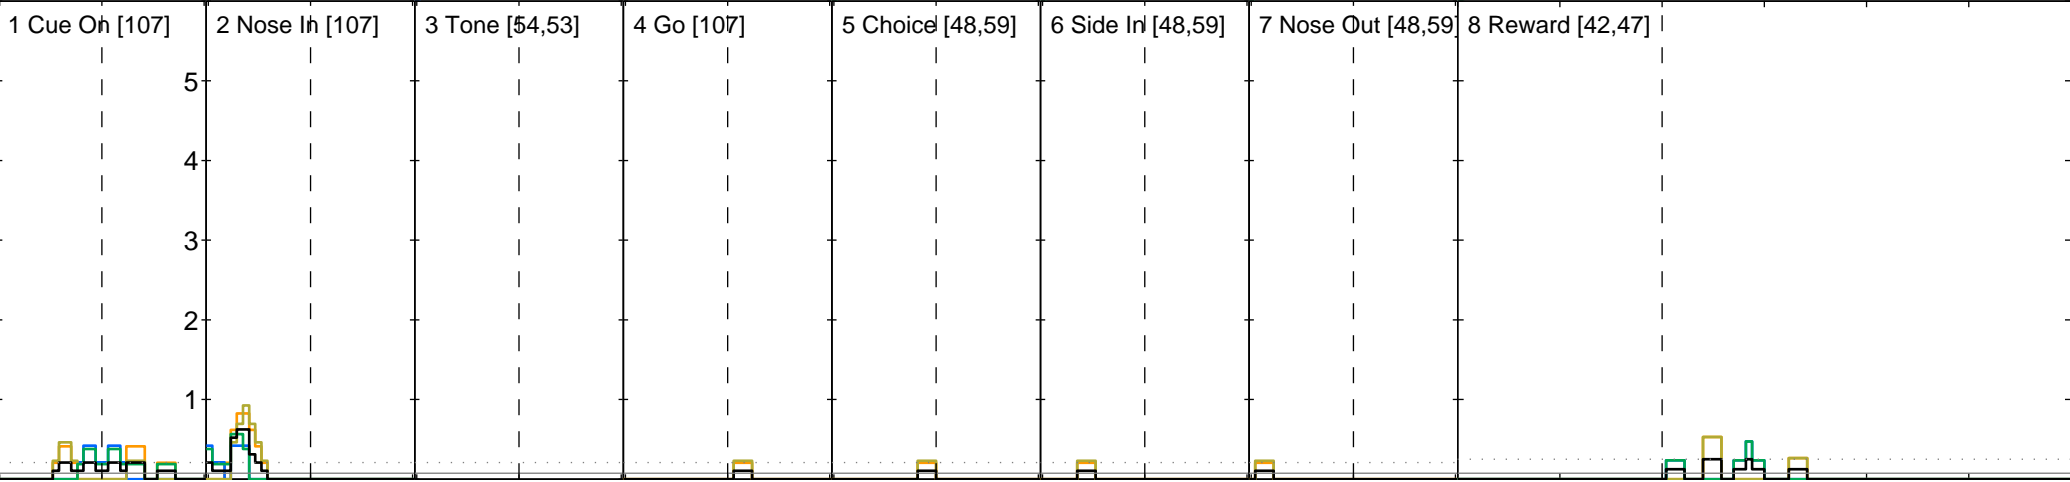

**Cell: C0320070625T09g**

AP: 1.6 ML: 3.7 DV: 5.5  
w: 3 n: 172  $P_{ISI>2}$ : 1  
1/2pw: 187 $\mu$ s p->v: 798 $\mu$ s  
 $\beta_T$ : NaN  $\beta_D$ : NaN  
 $\beta_P$ : NaN SI: NaN  
Session FR: 0.0395 Hz  
Pk Ev: None  
Pk FR: --

MSN

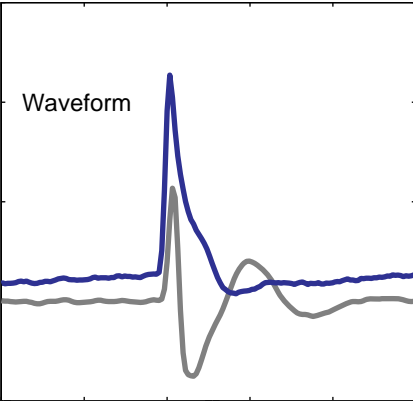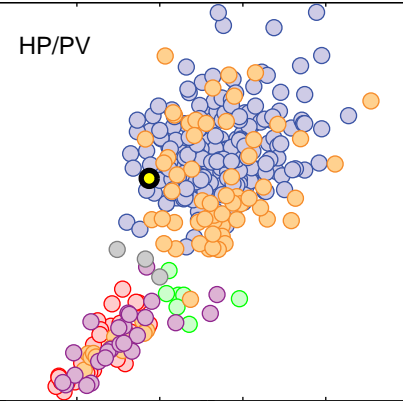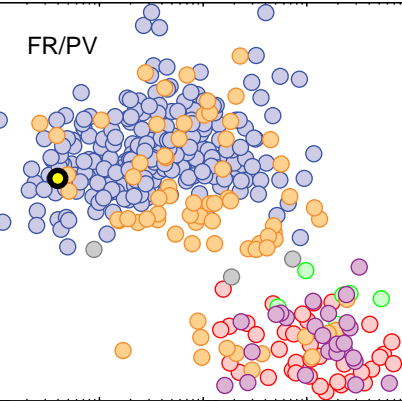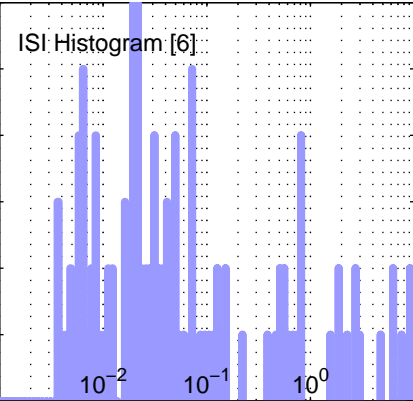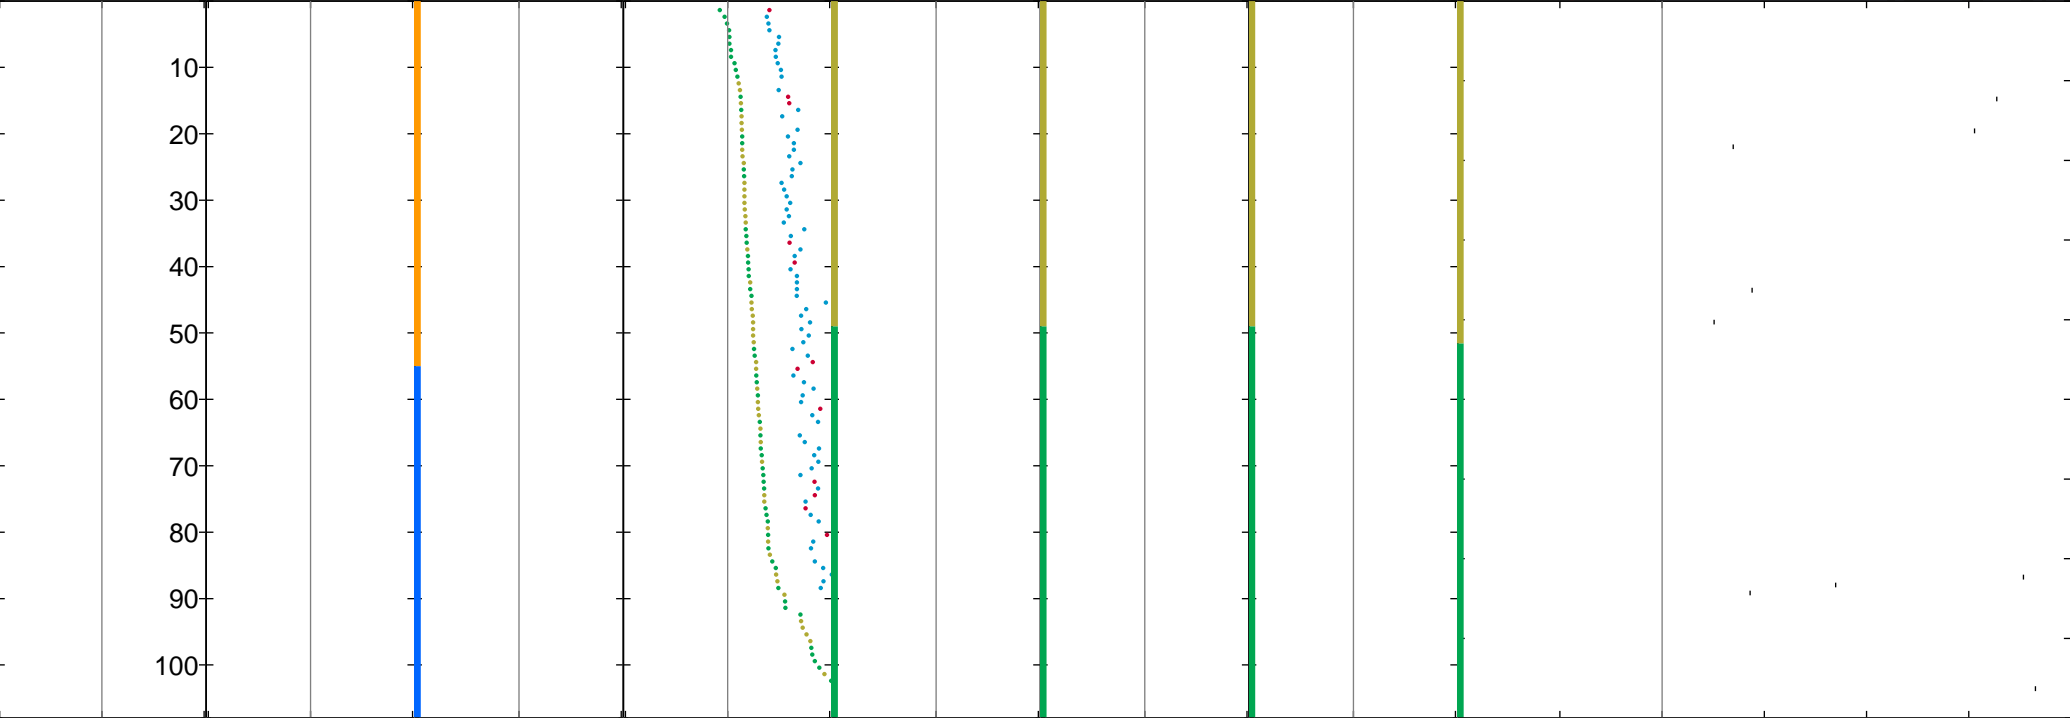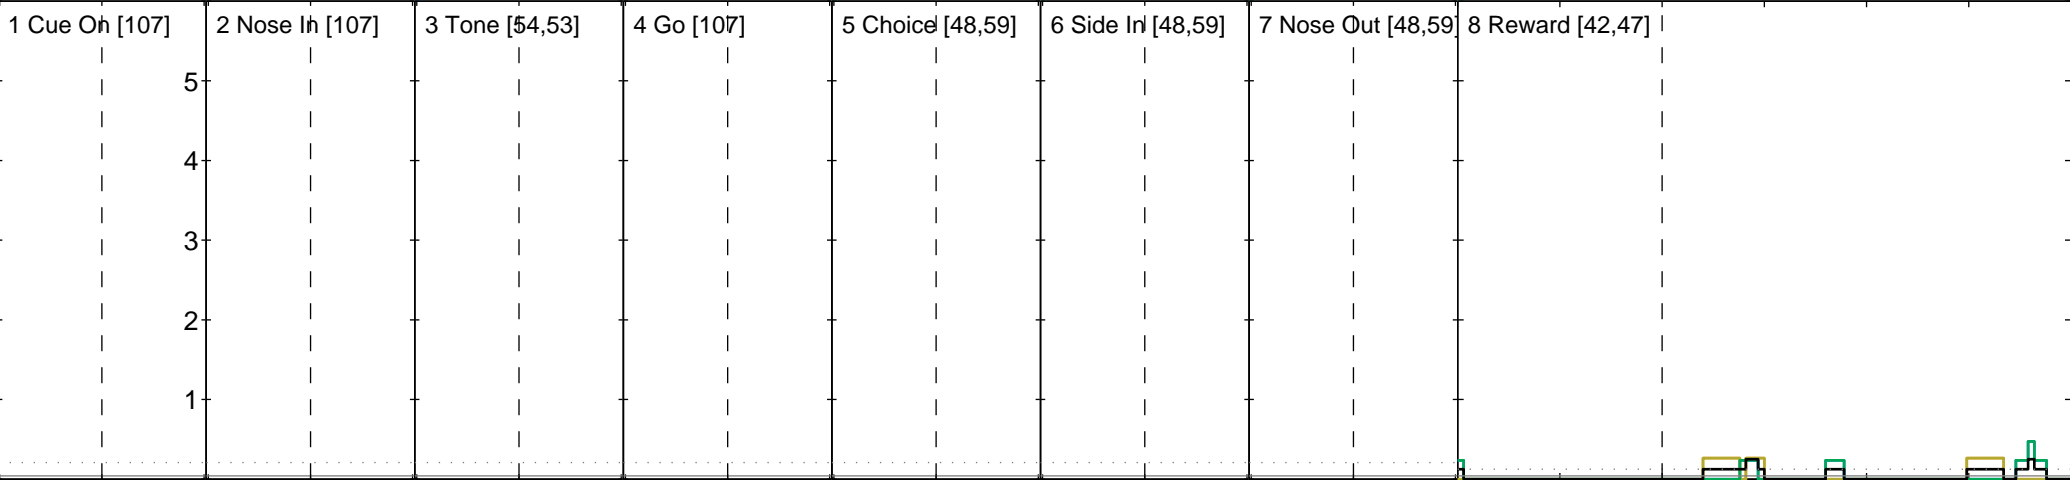

**Cell: C0320070625T11b**

AP: -0.96 ML: 3.7 DV: 6.2  
w: 3 n: 26  $P_{ISI>2}$ : 1  
1/2pw: 267 $\mu$ s p->v: 893 $\mu$ s  
 $\beta_T$ : NaN  $\beta_D$ : NaN  
 $\beta_P$ : NaN SI: NaN  
Session FR: 0.00942 Hz  
Pk Ev: None  
Pk FR: --

MSN

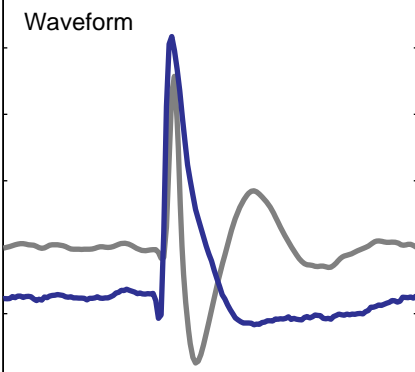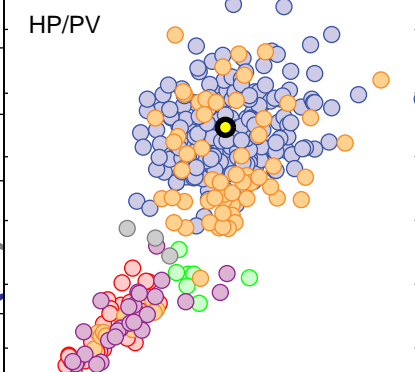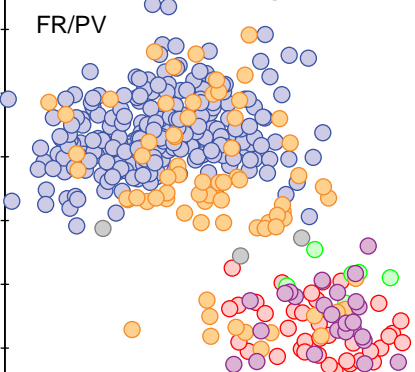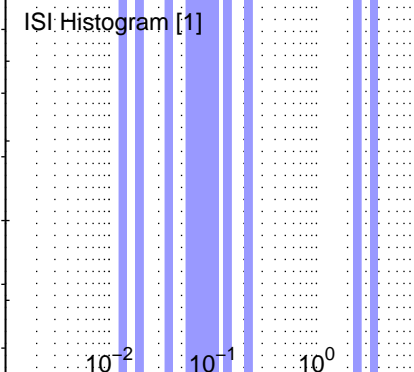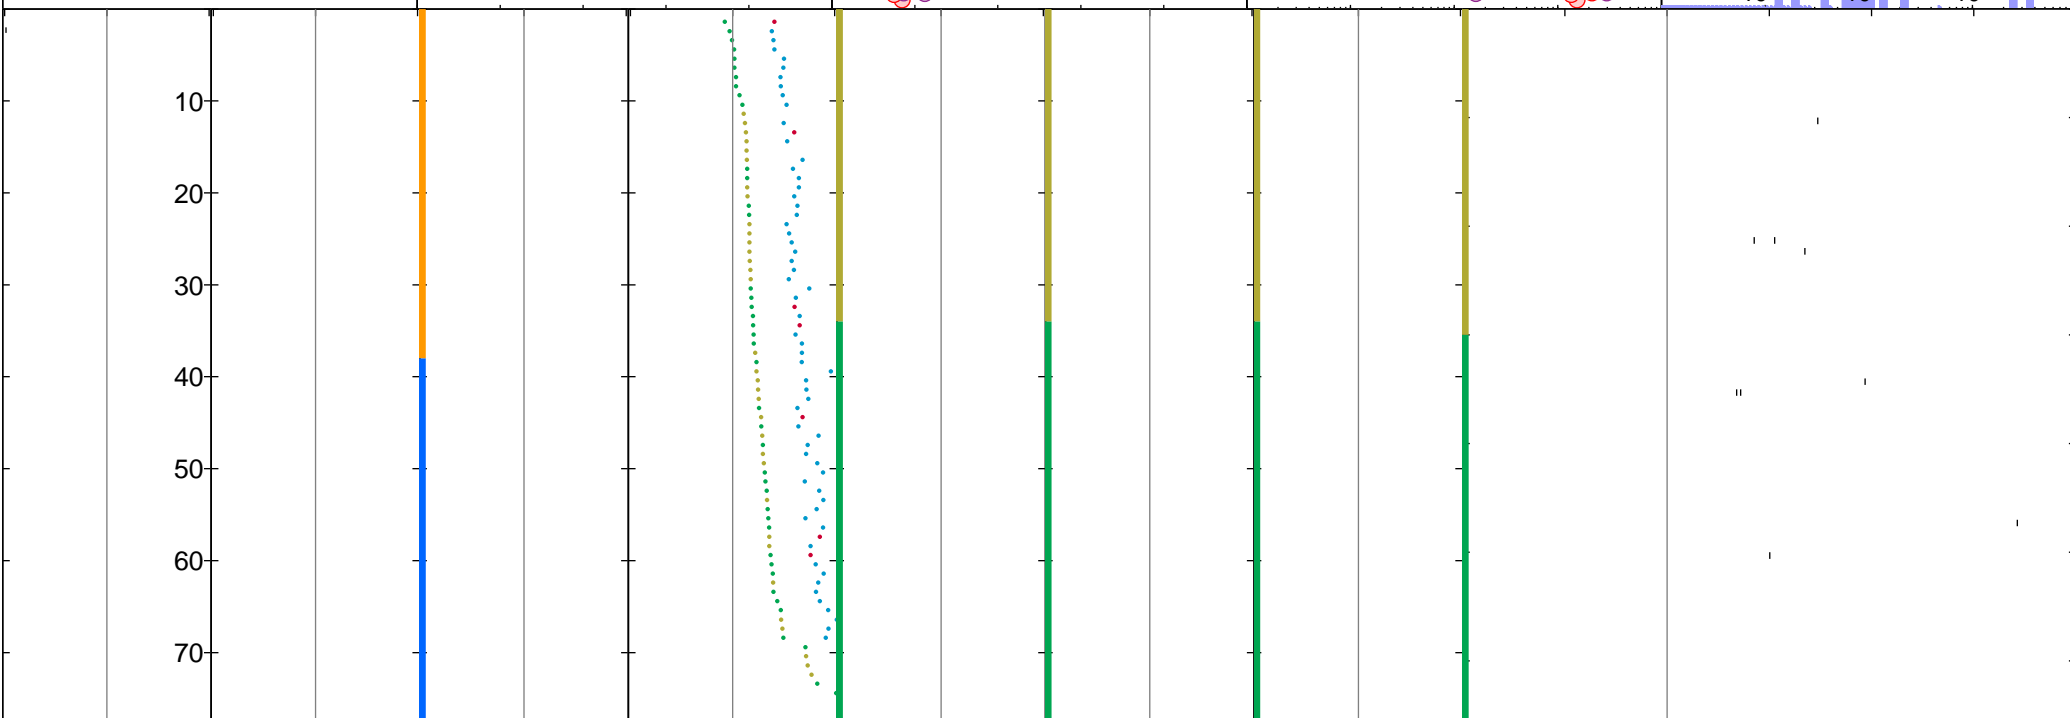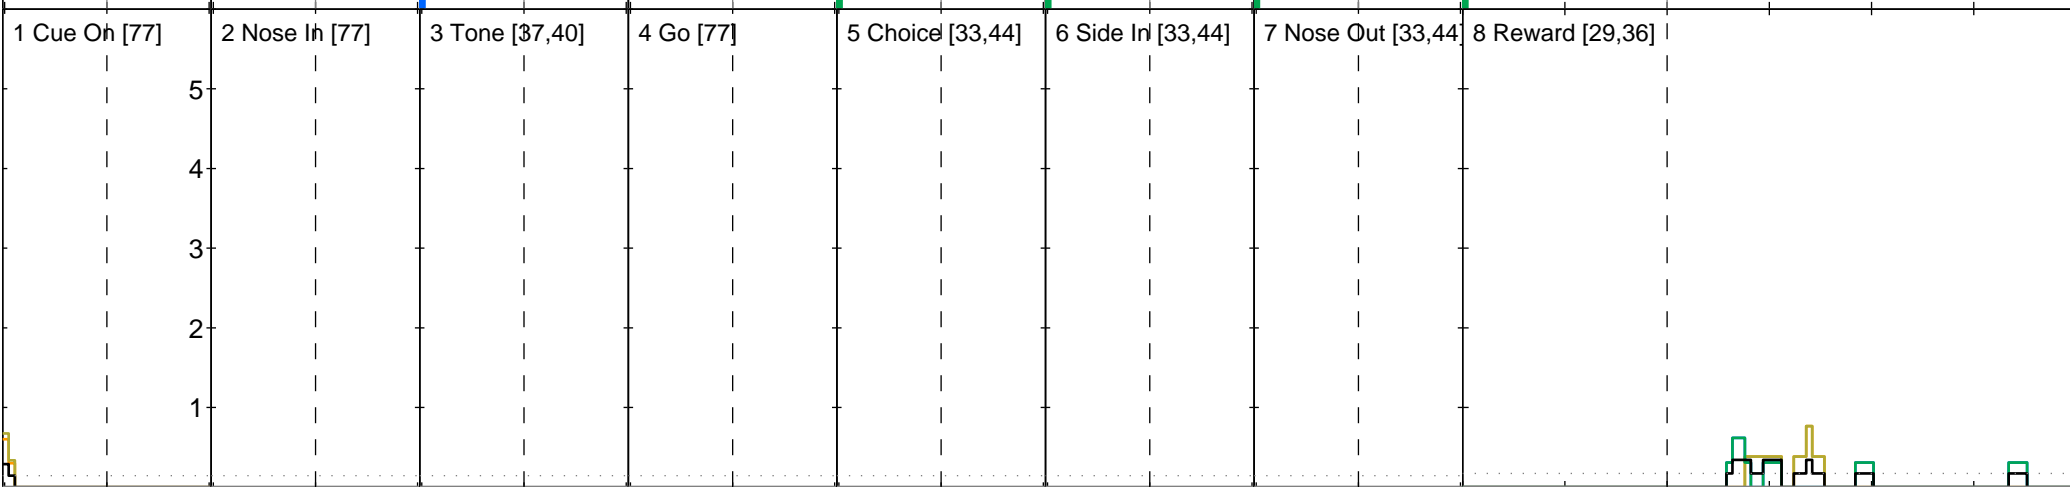

**Cell: C0320070626T09b**

AP: 1.6 ML: 3.7 DV: 5.6  
w: 3 n: 372  $P_{ISI>2}$ : 0.98  
1/2pw: 296 $\mu$ s p->v: 781 $\mu$ s  
 $\beta_T$ : NaN  $\beta_D$ : NaN  
 $\beta_P$ : NaN SI: NaN  
Session FR: 0.101 Hz  
Pk Ev: None  
Pk FR: --

MSN

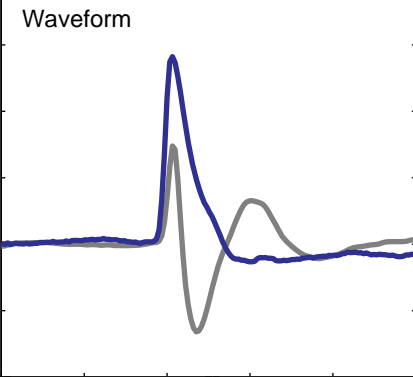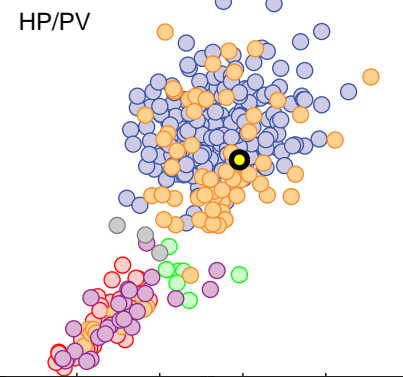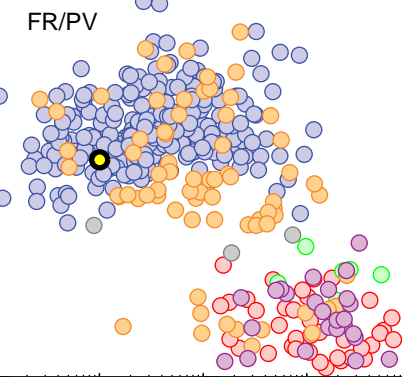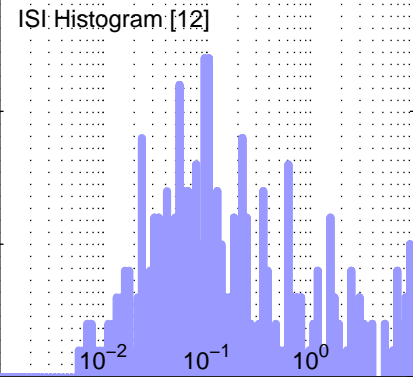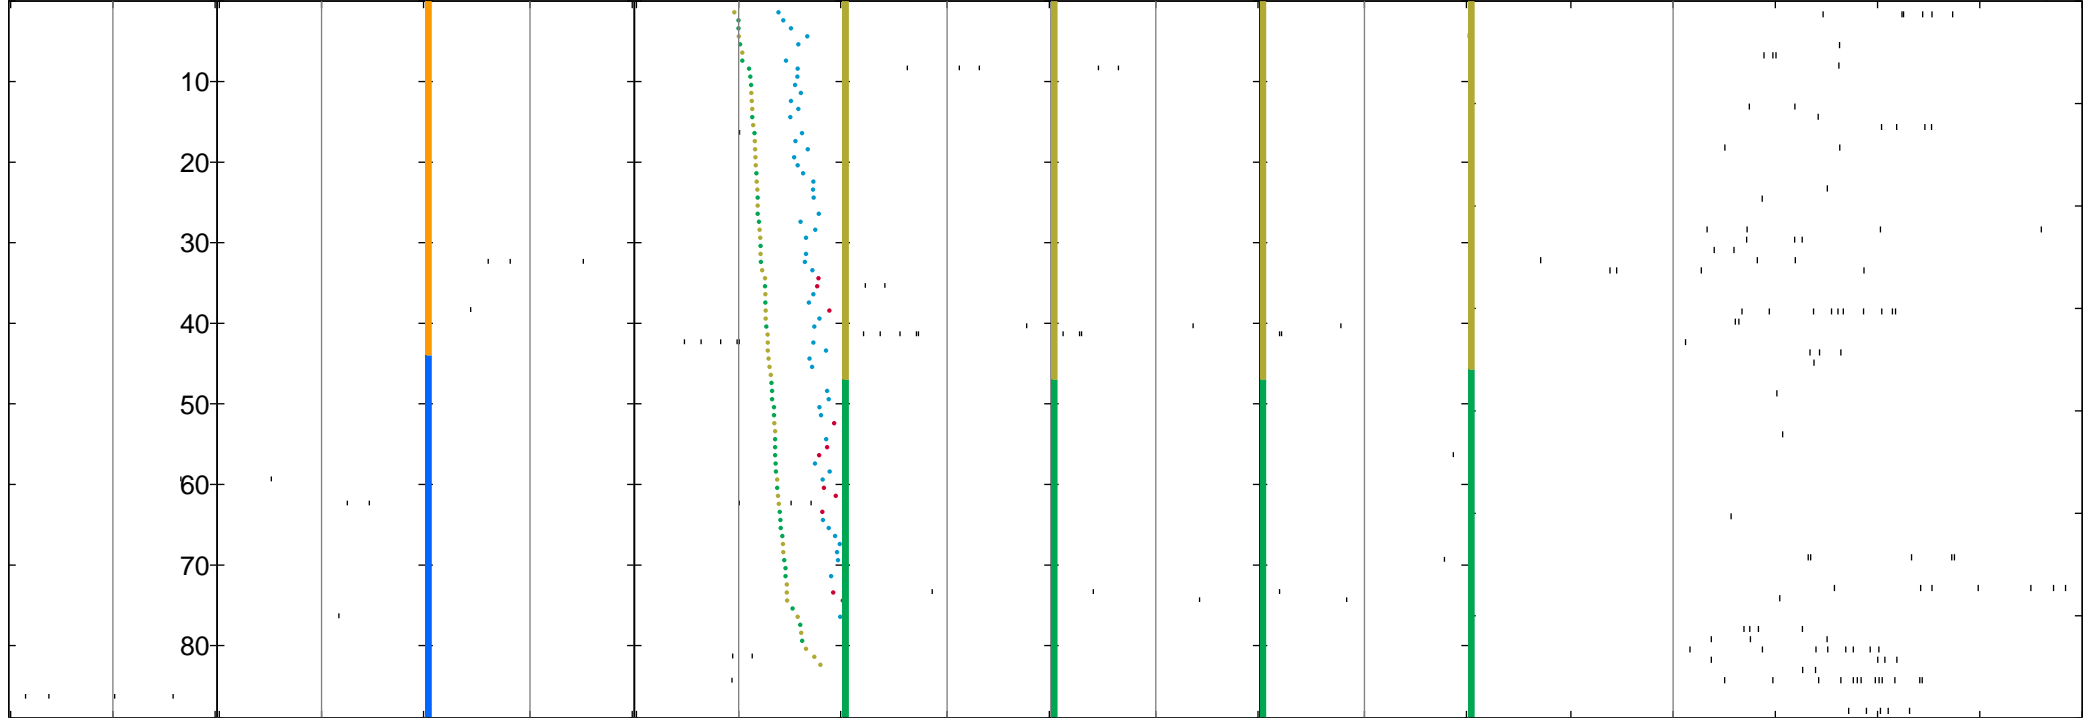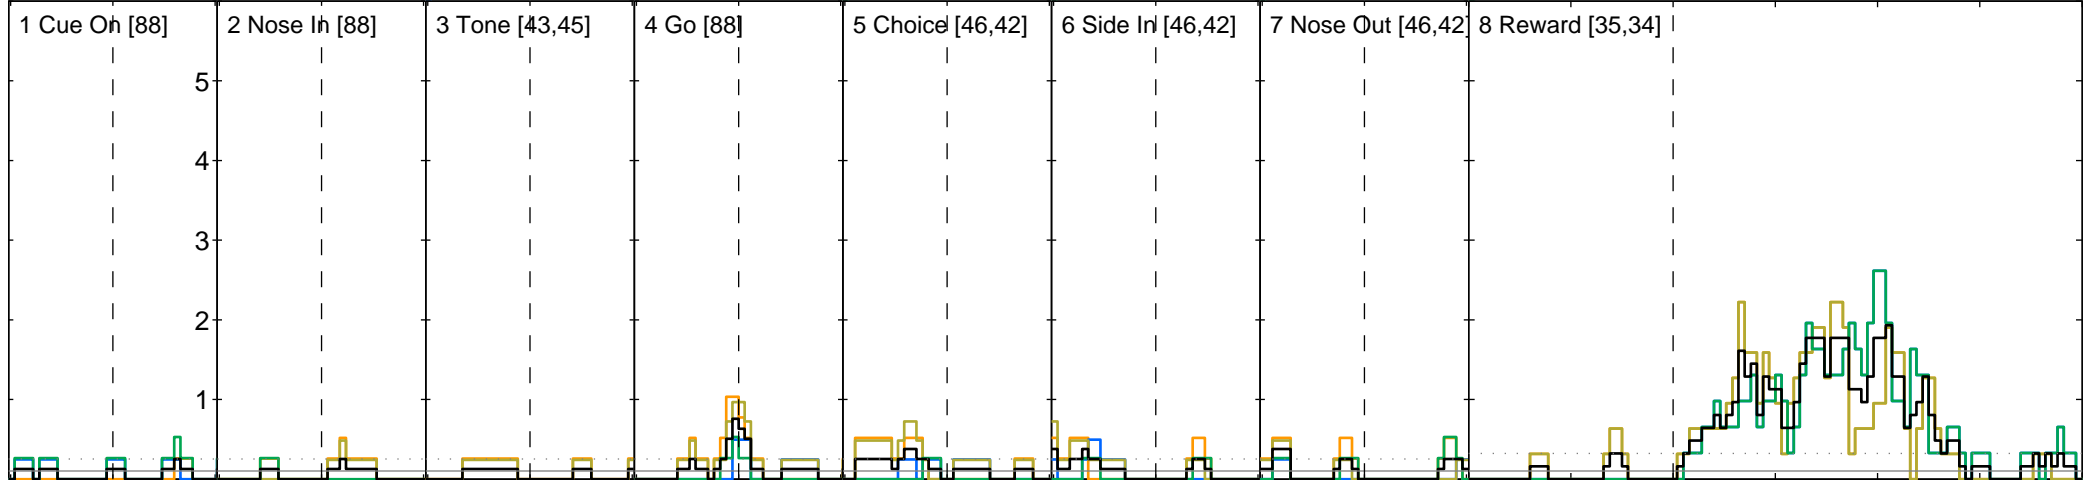

**Cell: C0320070626T09c**

AP: 1.6 ML: 3.7 DV: 5.6

w: 3 n: 459  $P_{ISI>2}$ : 0.981/2pw: 275 $\mu$ s p->v: 778 $\mu$ s $\beta_T$ : NaN  $\beta_D$ : NaN $\beta_P$ : NaN SI: NaN

Session FR: 0.124 Hz

Pk Ev: None

Pk FR: --

MSN

## Waveform

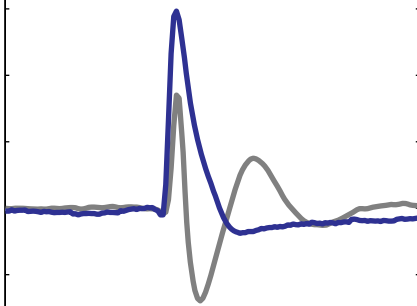

## HP/PV

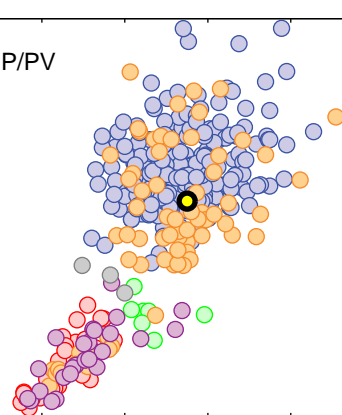

## FR/PV

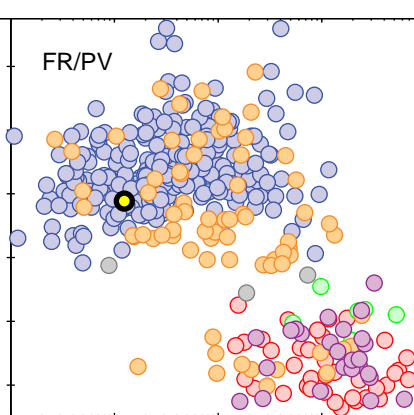

## ISI Histogram [11]

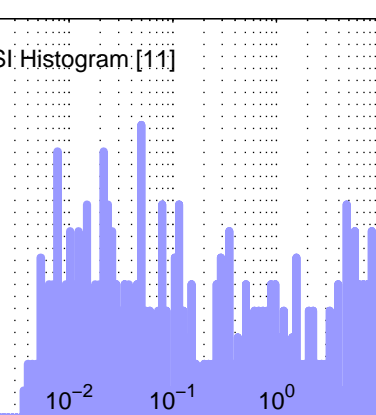

10

20

30

40

50

60

70

80

1 Cue On [88]

2 Nose In [88]

3 Tone [43,45]

4 Go [88]

5 Choice [46,42]

6 Side In [46,42]

7 Nose Out [46,42]

8 Reward [35,34]

5

4

3

2

1

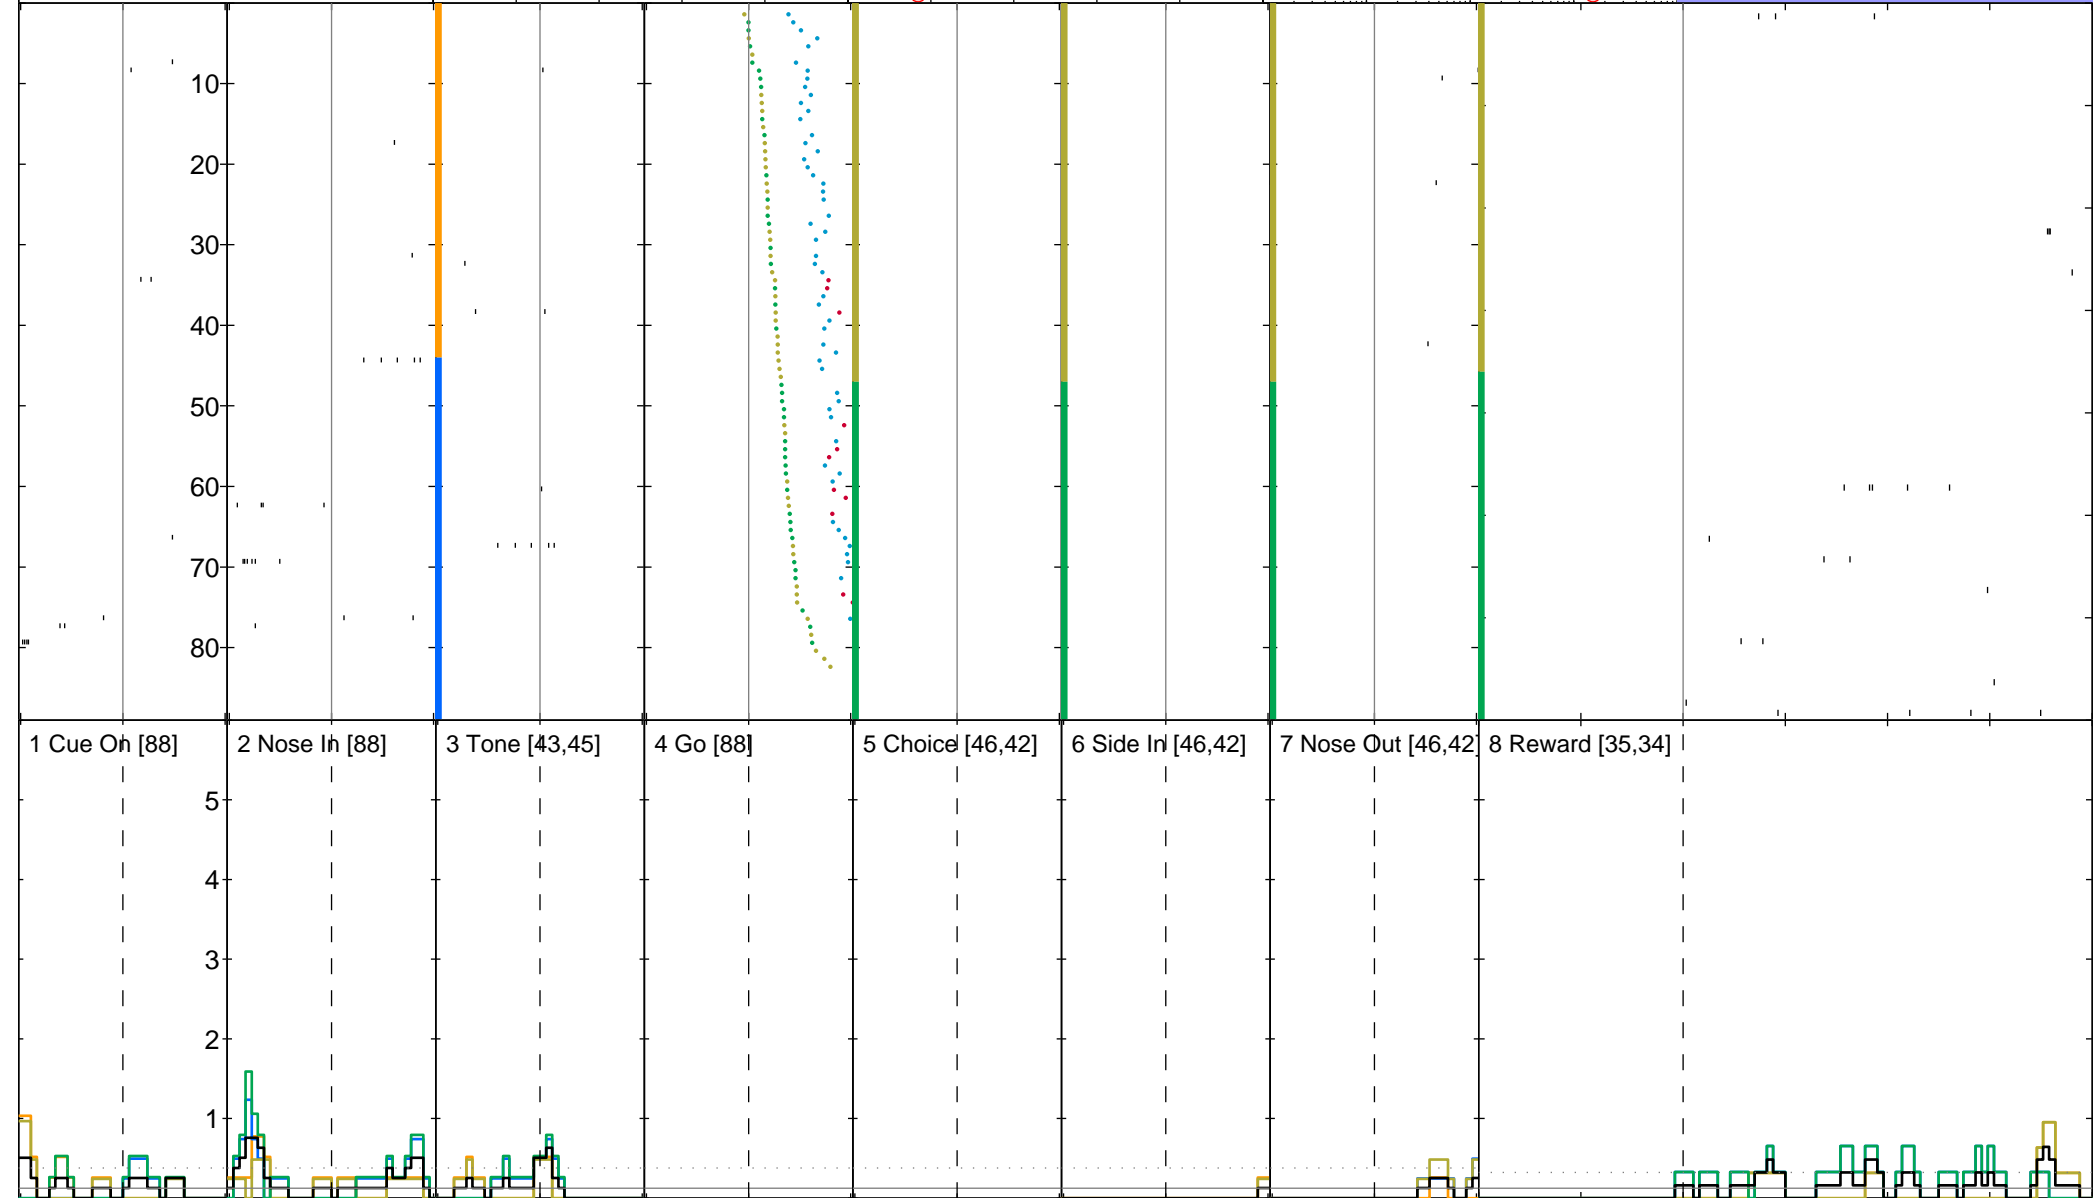

Cell: C0320070627T06a

AP: 1.7 ML: 1.3 DV: 7.3

w: 4 n: 3565  $P_{ISI>2}$ : 0.62

1/2pw: 347 $\mu$ s p->v: 806 $\mu$ s

$\beta_T$ : NaN  $\beta_D$ : NaN

$\beta_P$ : NaN SI: NaN

Session FR: 1.03 Hz

Pk Ev: None

Pk FR: --

MSN

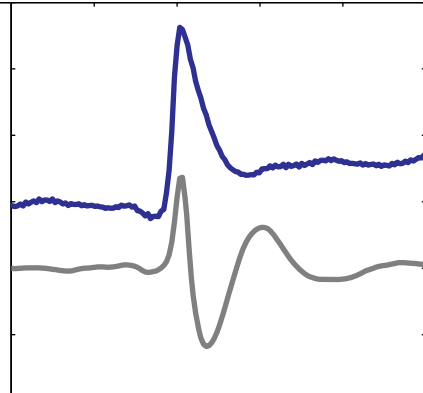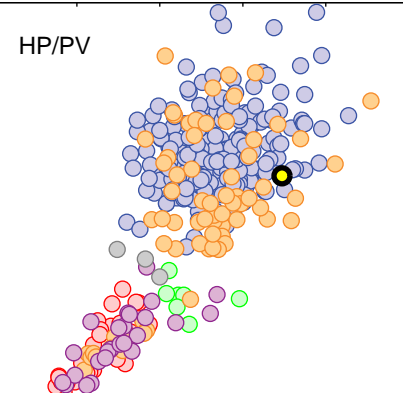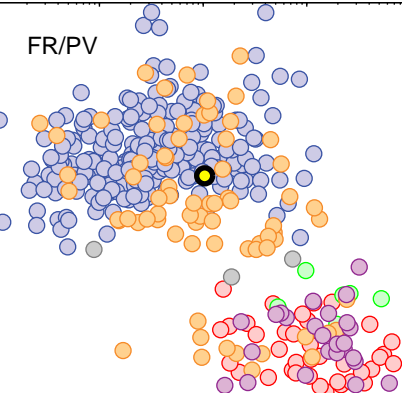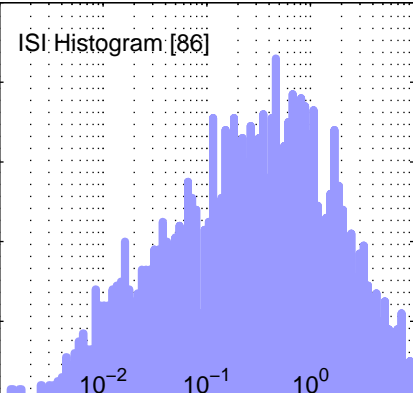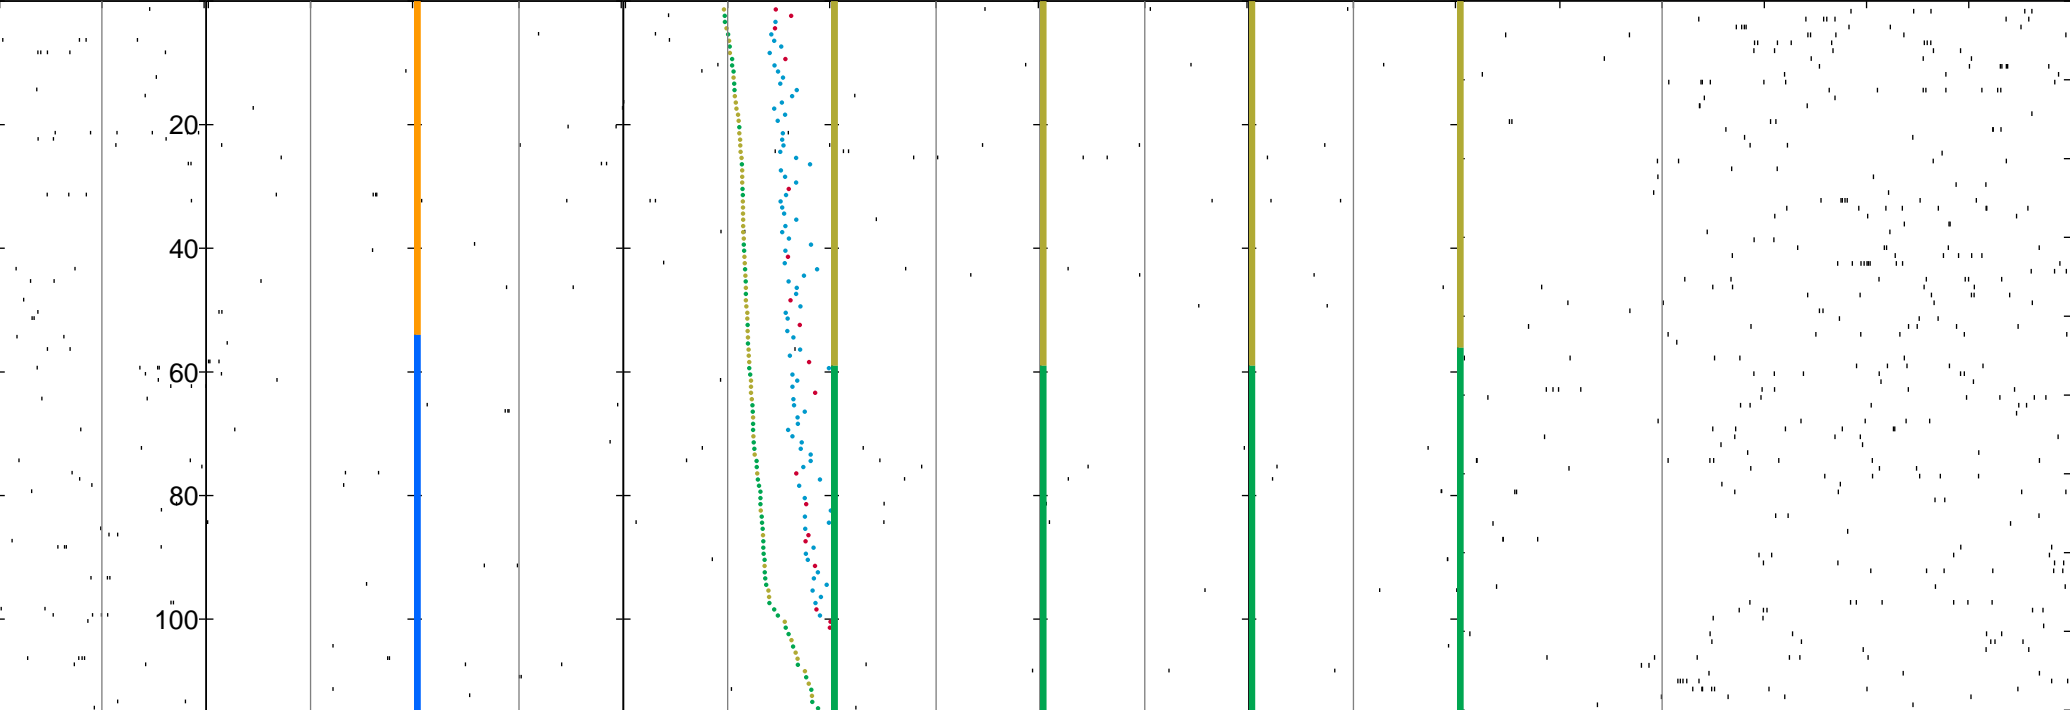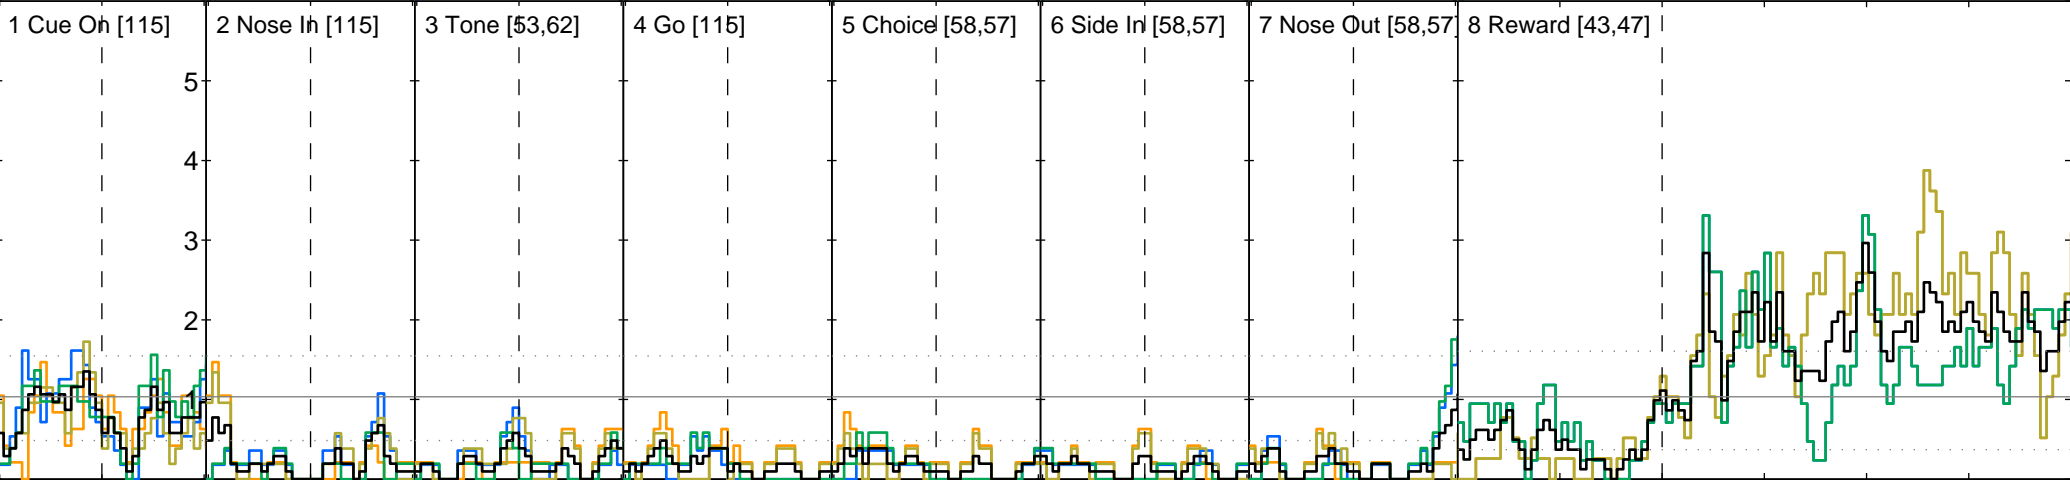



**Cell: C0320070627T07a**

AP: 0.96 ML: 3.6 DV: 7.1  
w: 4 n: 1975  $P_{ISI>2}$ : 0.85  
1/2pw: 344 $\mu$ s p->v: 1010 $\mu$ s  
 $\beta_T$ : NaN  $\beta_D$ : NaN  
 $\beta_P$ : NaN SI: NaN  
Session FR: 0.572 Hz  
Pk Ev: None  
Pk FR: --

MSN

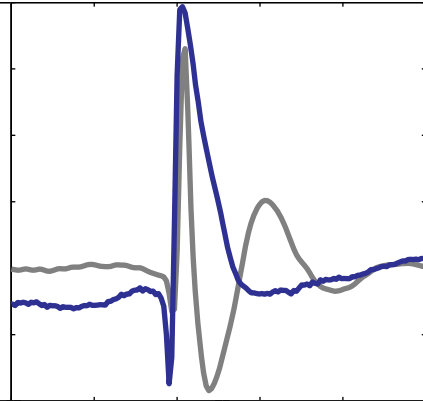

HP/PV

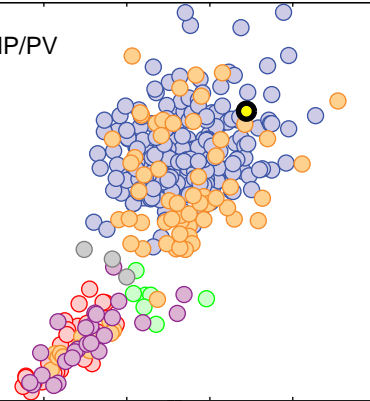

FR/PV

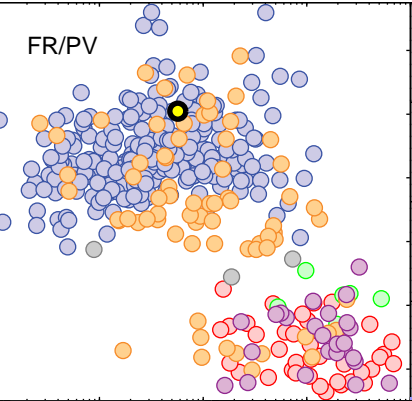

ISI Histogram [40]

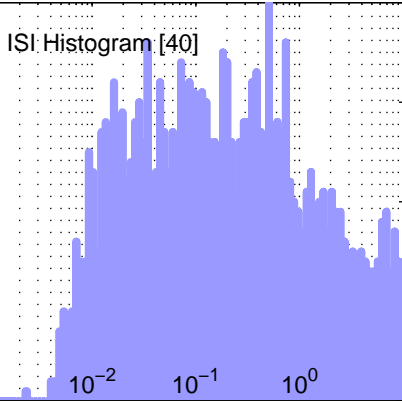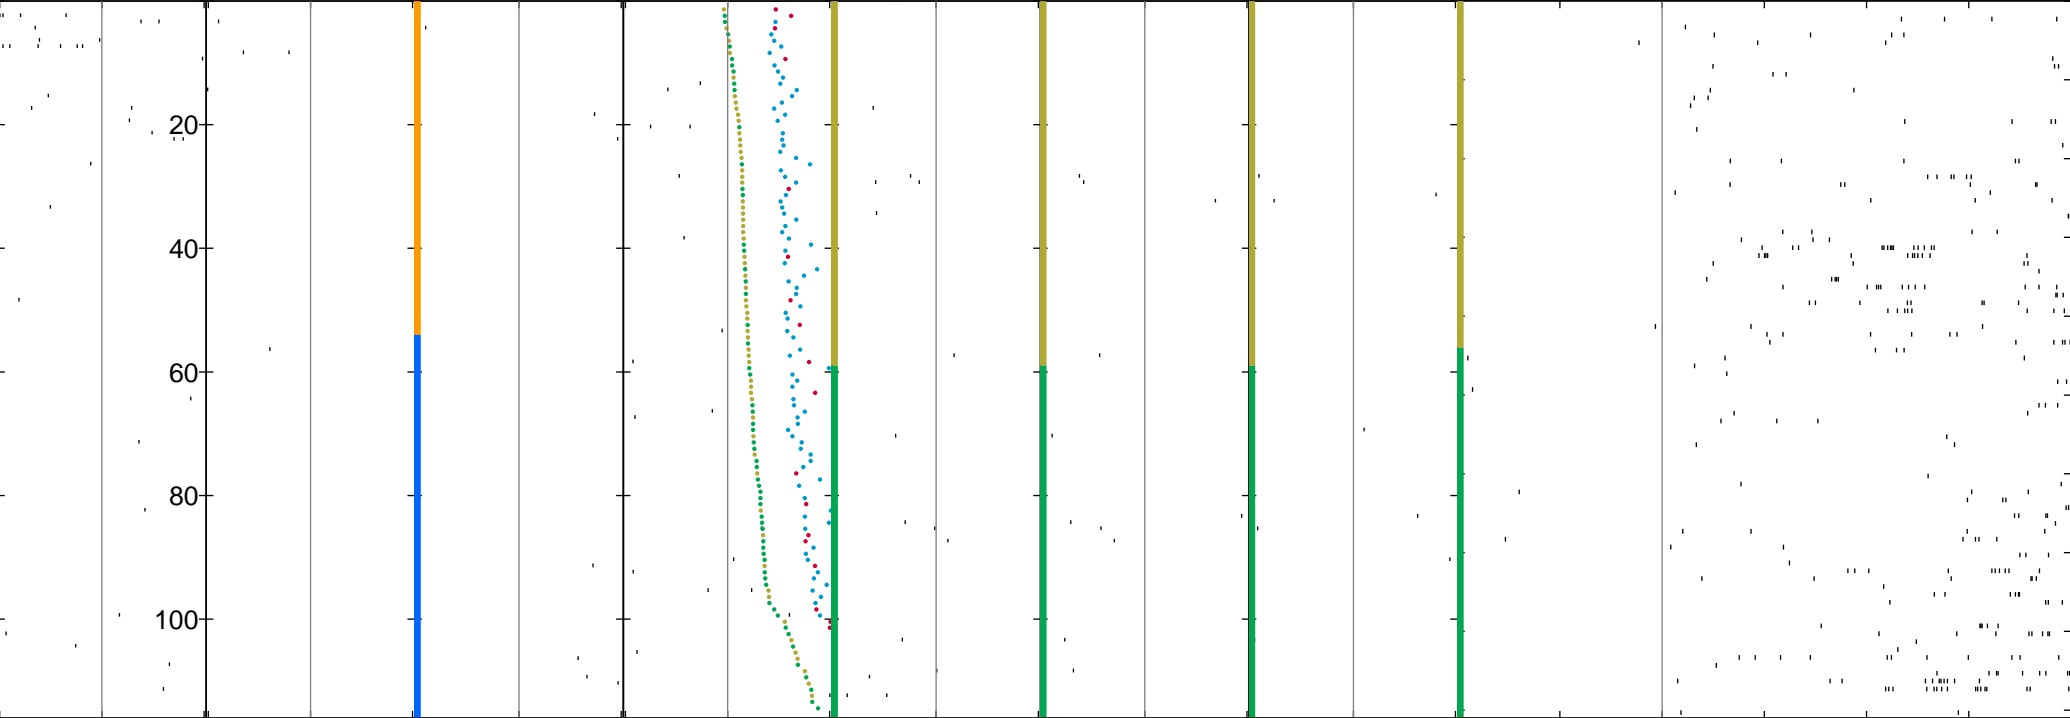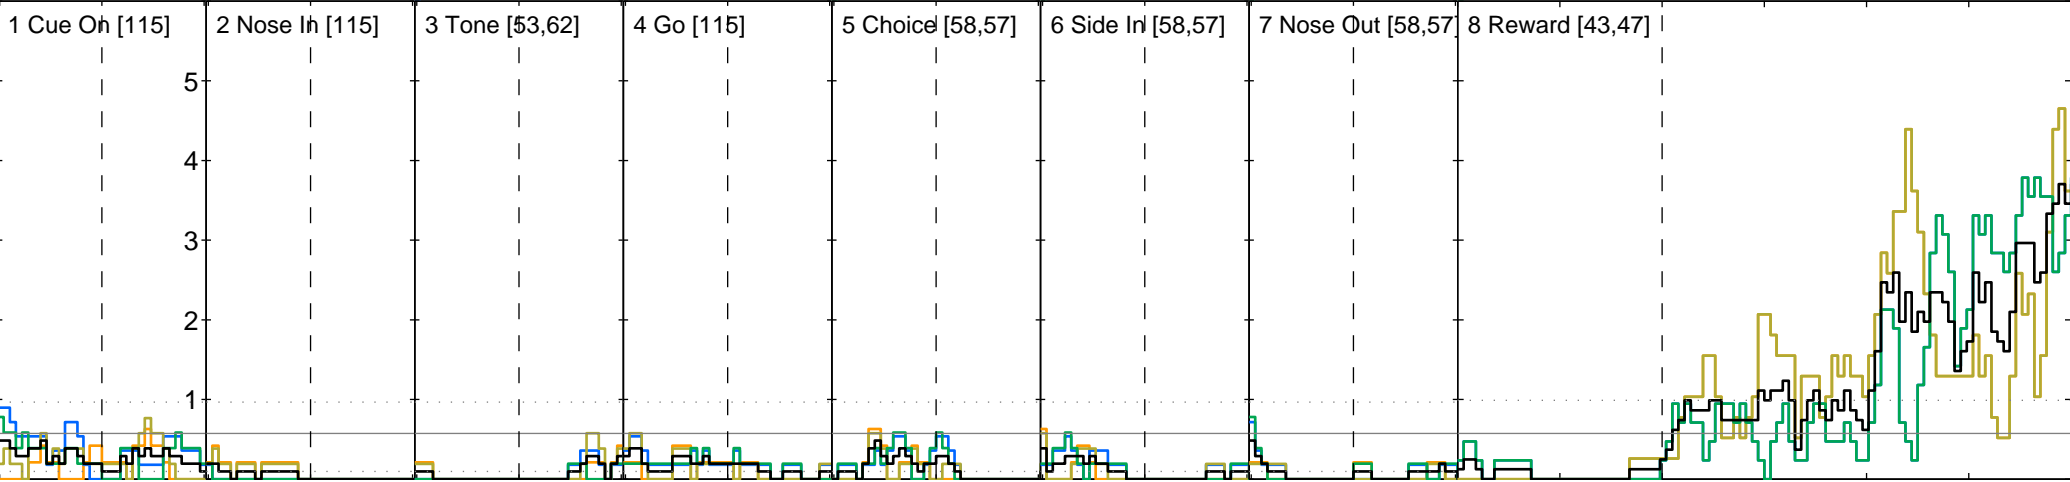

**Cell: C0320070627T11c**

AP: -0.96 ML: 3.7 DV: 6.6

w: 1 n: 425  $P_{ISI>2}$ : 0.95

1/2pw: 229 $\mu$ s p->v: 734 $\mu$ s

$\beta_T$ : NaN  $\beta_D$ : NaN

$\beta_P$ : NaN SI: NaN

Session FR: 0.174 Hz

Pk Ev: None

Pk FR: --

MSN

Waveform

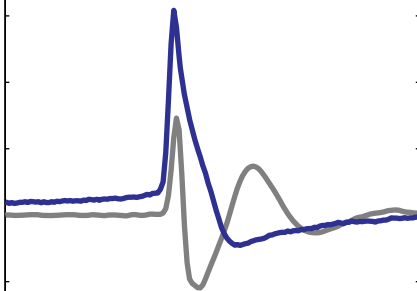

HP/PV

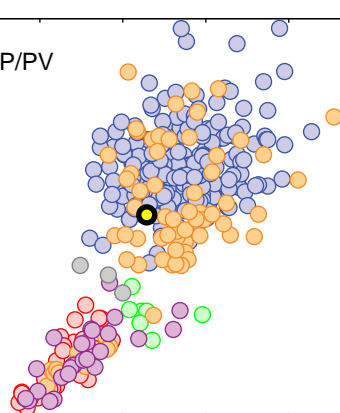

FR/PV

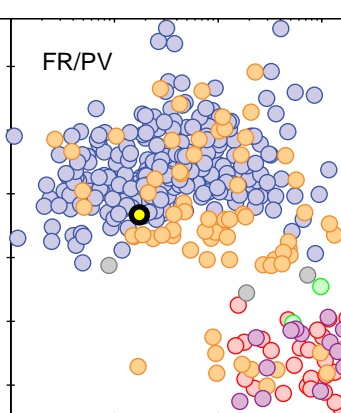

ISI Histogram [13]

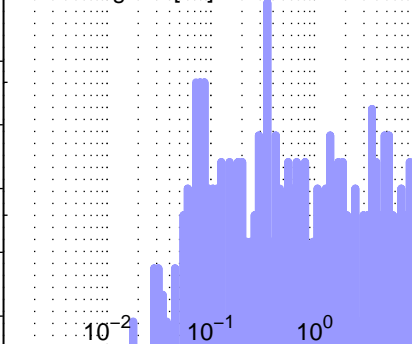

10

20

30

40

50

60

70

80

1 Cue On [81]

2 Nose In [81]

3 Tone [32,49]

4 Go [81]

5 Choice [42,39]

6 Side In [42,39]

7 Nose Out [42,39]

8 Reward [28,35]

5

4

3

2

1

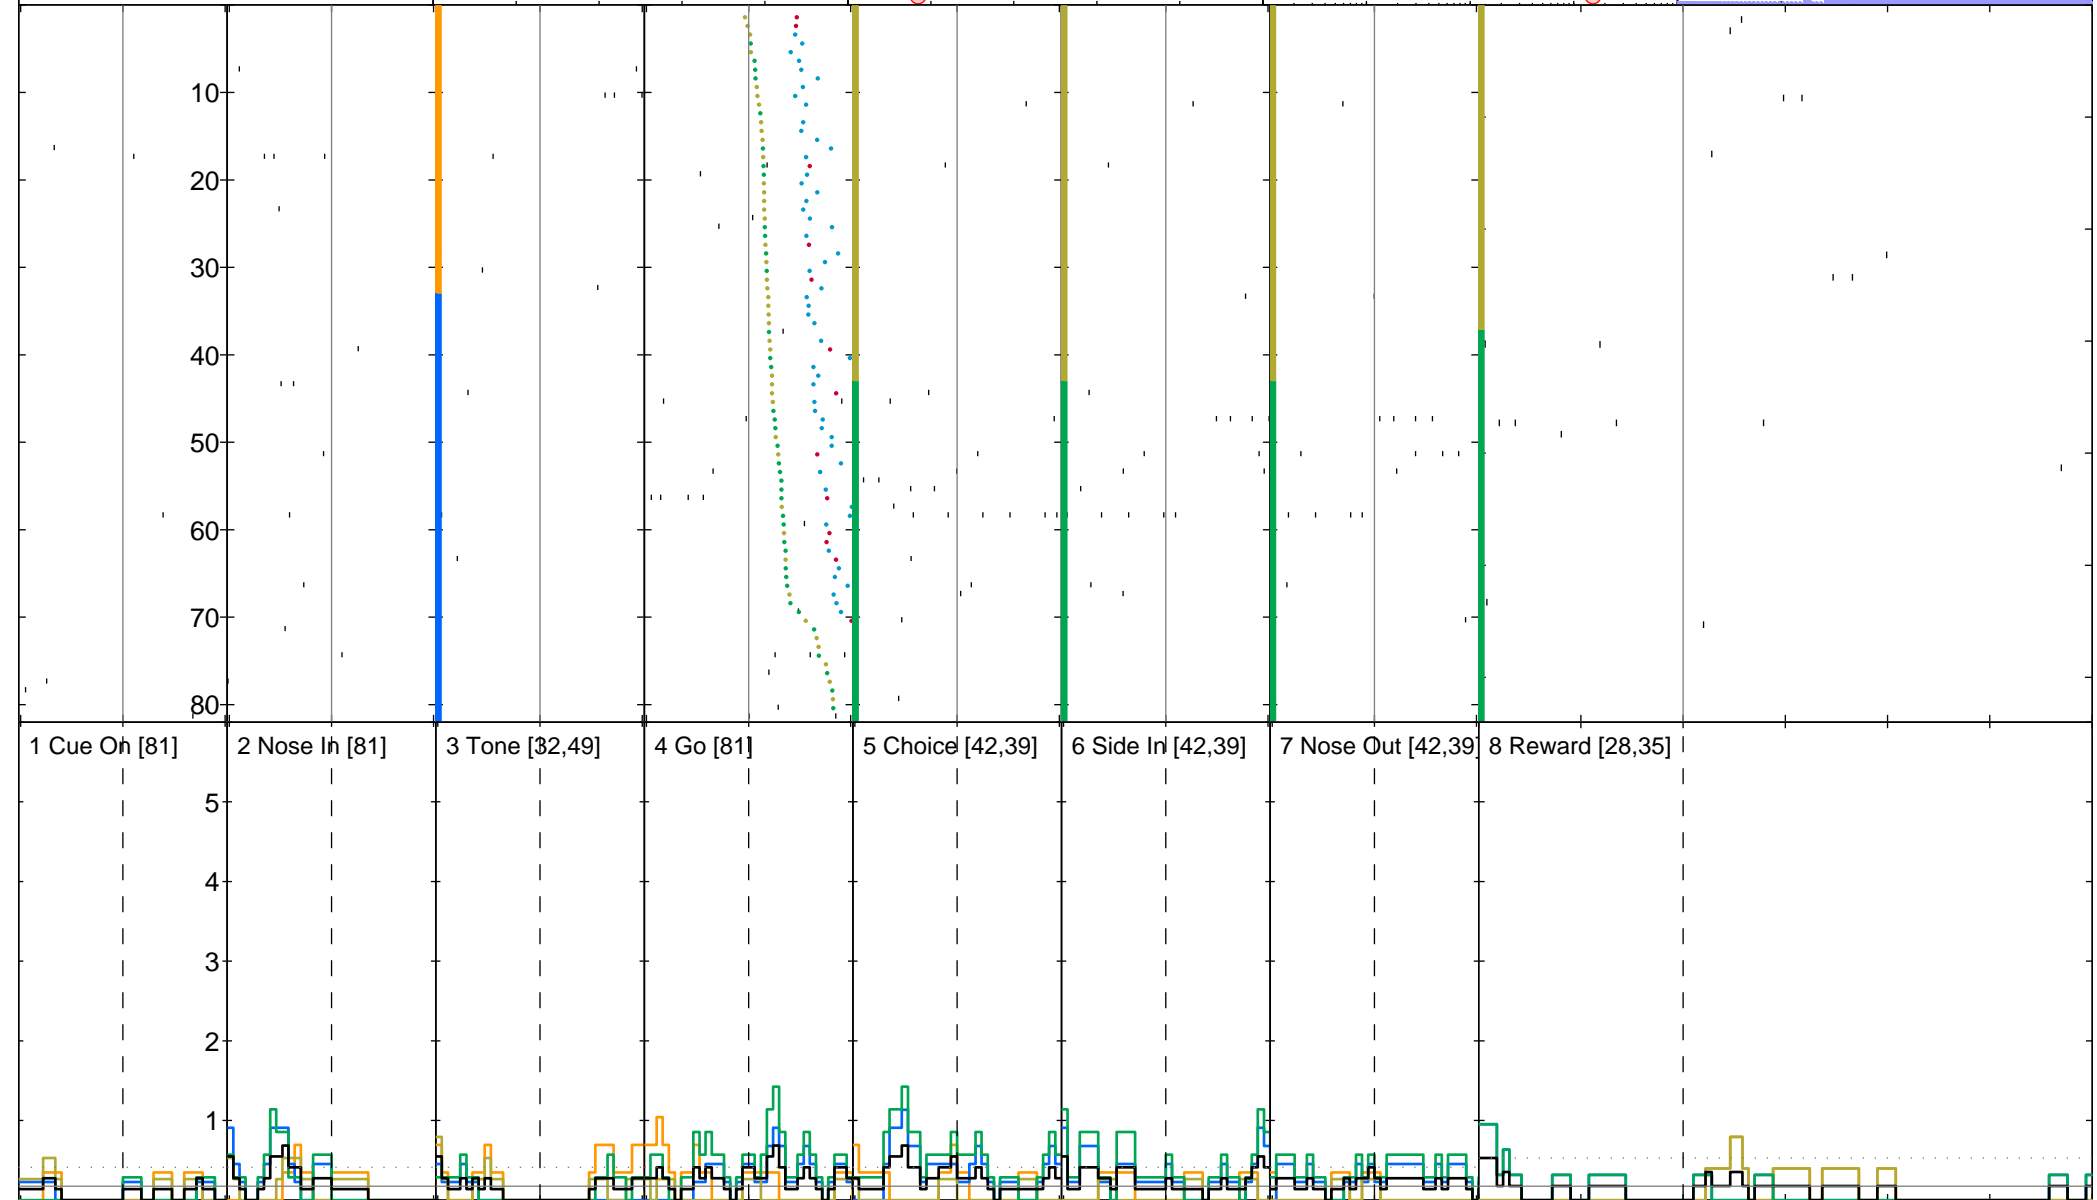

**Cell: C0320070630T06b**

AP: 1.7 ML: 1.3 DV: 7.5  
w: 3 n: 301  $P_{ISI>2}$ : 0.98  
1/2pw: 301 $\mu$ s p->v: 723 $\mu$ s  
 $\beta_T$ : NaN  $\beta_D$ : NaN  
 $\beta_P$ : NaN SI: NaN  
Session FR: 0.0993 Hz  
Pk Ev: None  
Pk FR: --

MSN

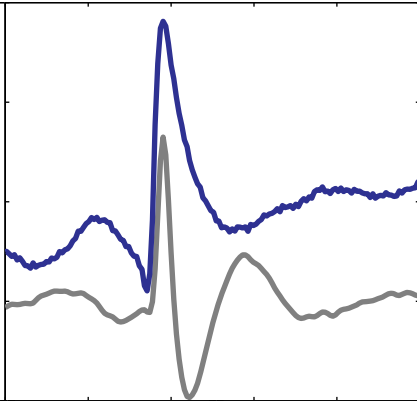

HP/PV

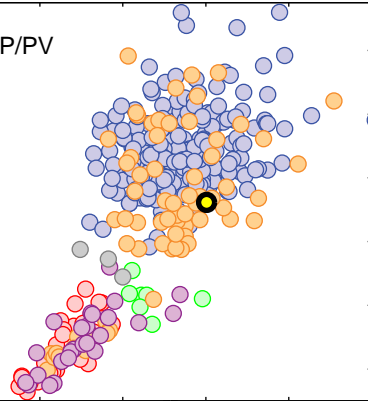

FR/PV

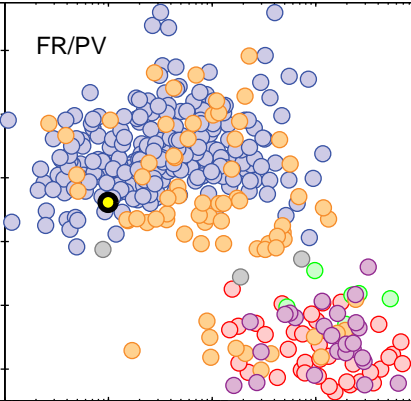

ISI Histogram [9]

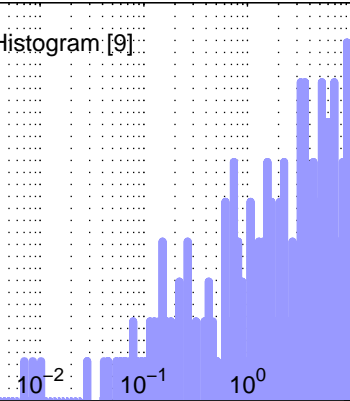

10  
20  
30  
40  
50  
60  
70  
80

1 Cue On [82]

2 Nose In [82]

3 Tone [38,44]

4 Go [82]

5 Choice [35,47]

6 Side In [35,47]

7 Nose Out [35,47]

8 Reward [26,35]

5  
4  
3  
2  
1

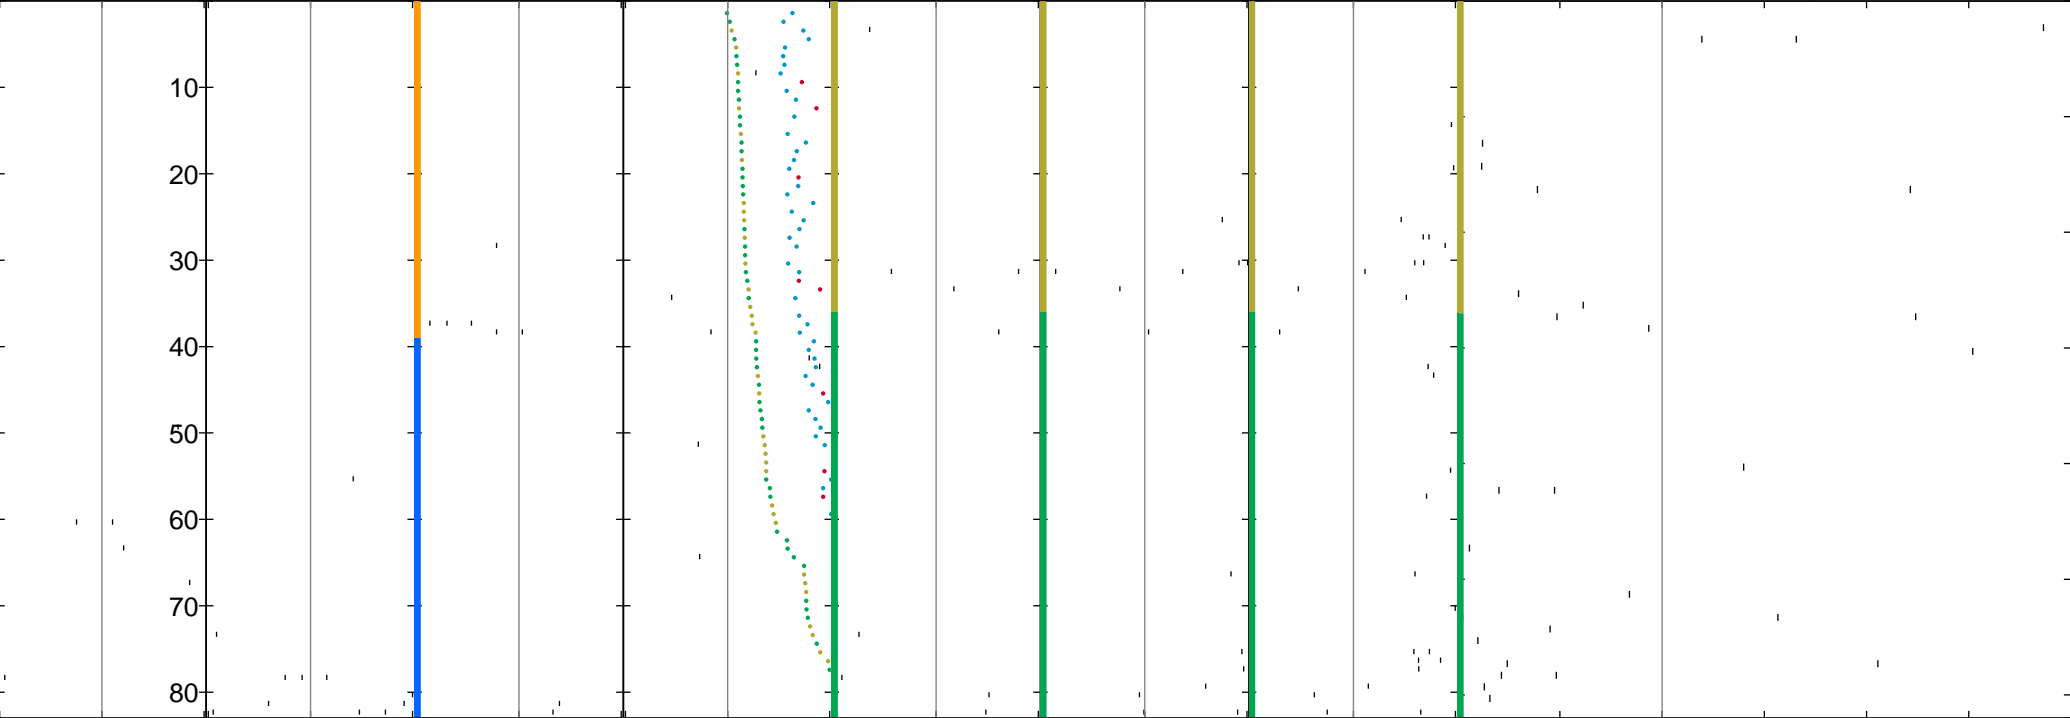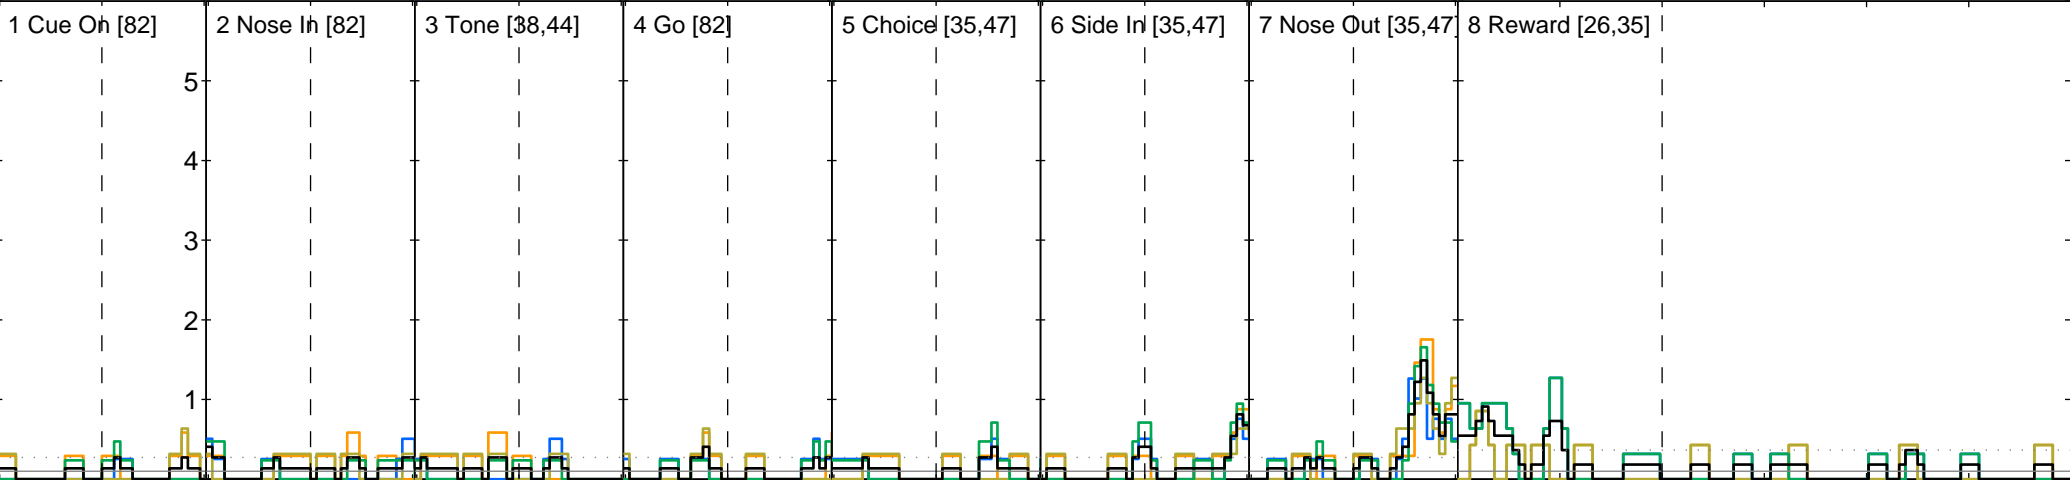

**Cell: C0320070630T09a**

AP: 1.6 ML: 3.7 DV: 6.2  
w: 1 n: 227  $P_{ISI>2}$ : 0.99  
1/2pw: 267 $\mu$ s p->v: 931 $\mu$ s  
 $\beta_T$ : NaN  $\beta_D$ : NaN  
 $\beta_P$ : NaN SI: NaN  
Session FR: 0.0796 Hz  
Pk Ev: None  
Pk FR: --

MSN

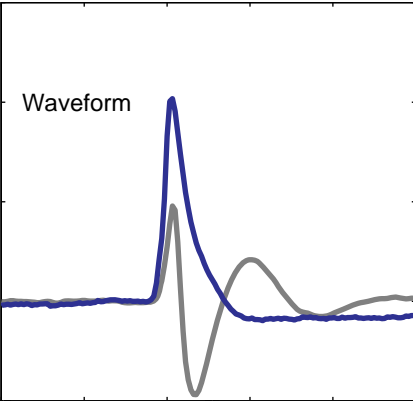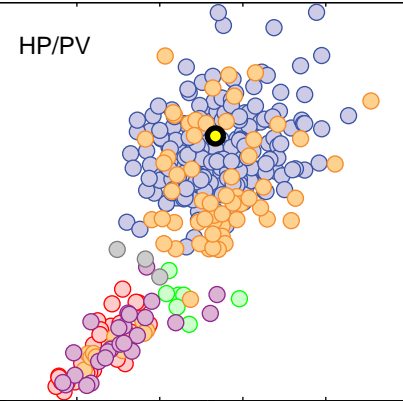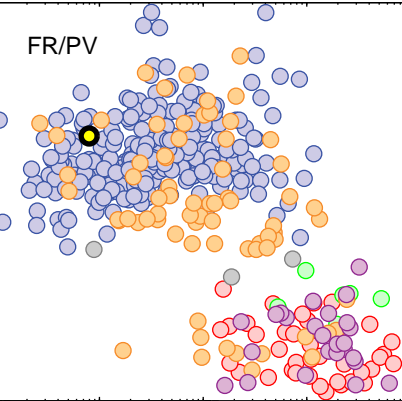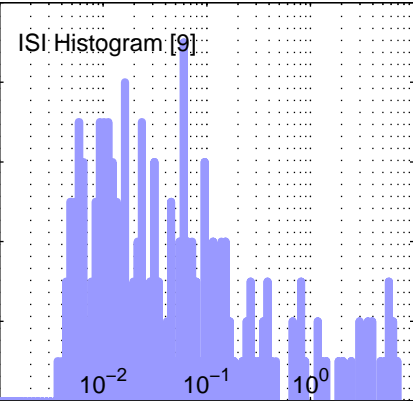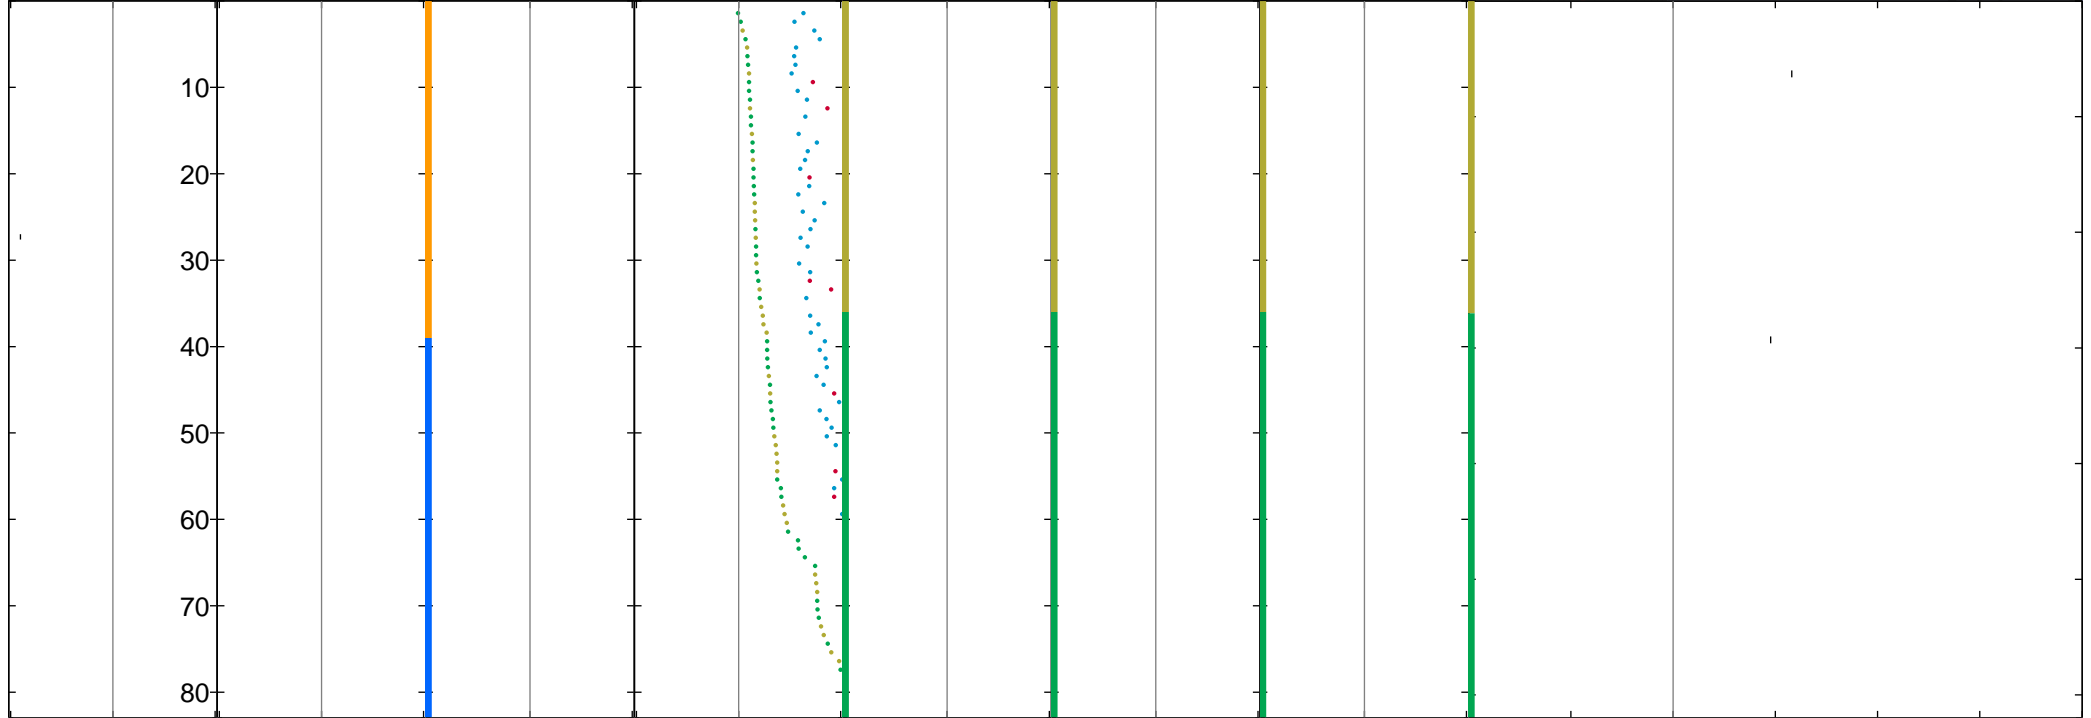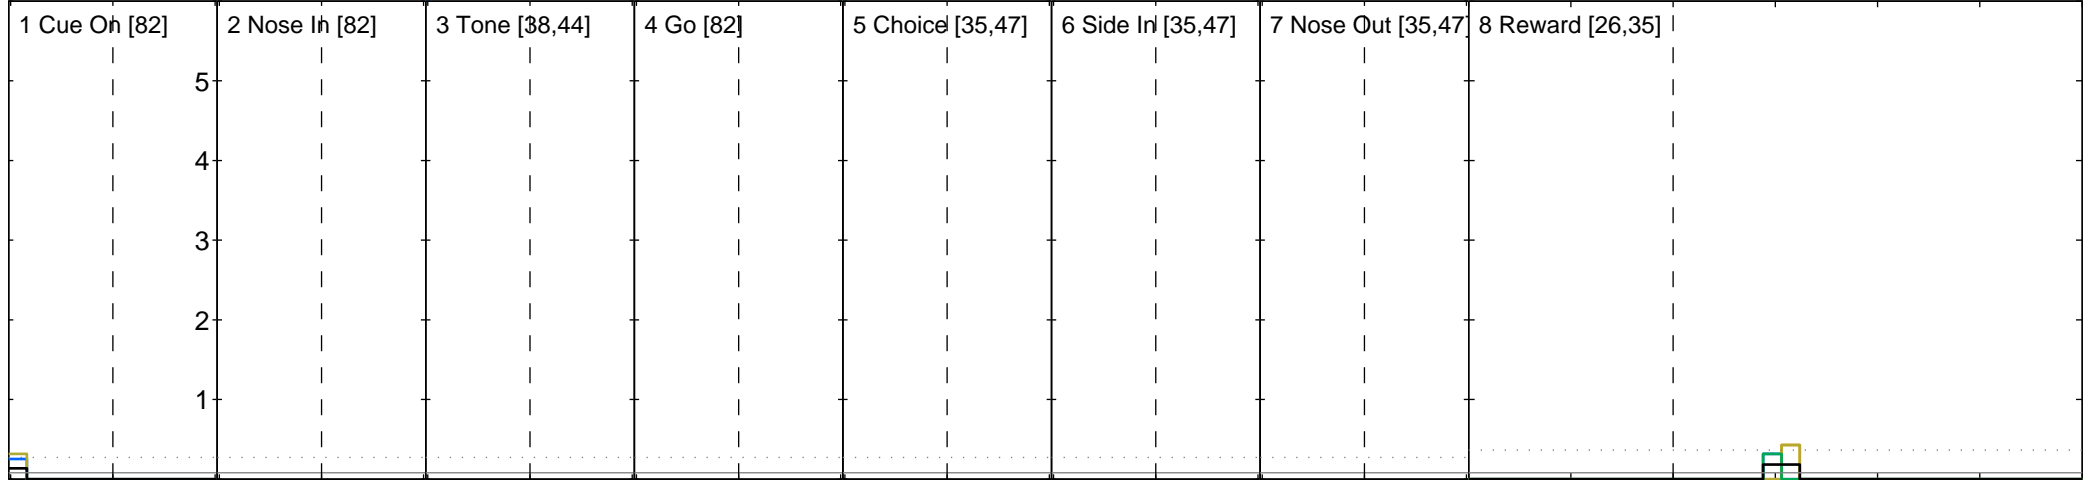

**Cell: C0320070630T09c**

AP: 1.6 ML: 3.7 DV: 6.2

w: 1 n: 288  $P_{ISI>2}$ : 0.981/2pw: 261 $\mu$ s p $\rightarrow$ v: 784 $\mu$ s $\beta_T$ : NaN  $\beta_D$ : NaN $\beta_P$ : NaN SI: NaN

Session FR: 0.0962 Hz

Pk Ev: None

Pk FR: --

MSN

Waveform

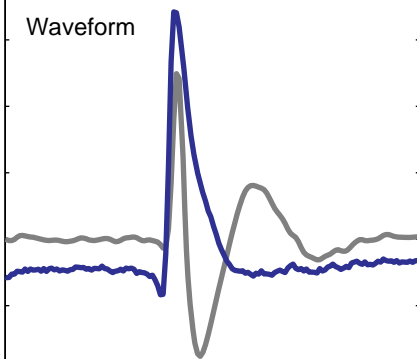

HP/PV

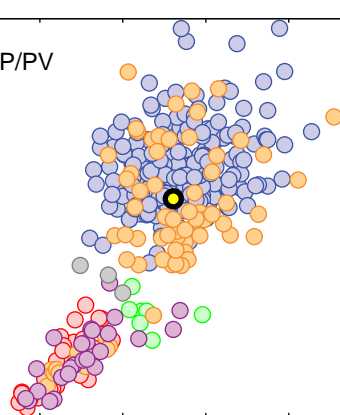

FR/PV

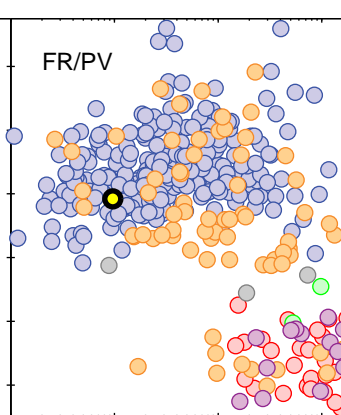

ISI Histogram [8]

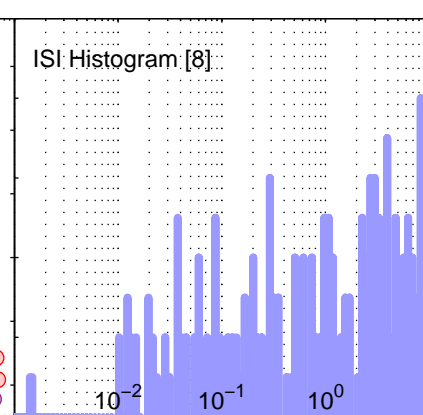

10

20

30

40

50

60

70

80

1 Cue On [82]

2 Nose In [82]

3 Tone [38,44]

4 Go [82]

5 Choice [35,47]

6 Side In [35,47]

7 Nose Out [35,47]

8 Reward [26,35]

5

4

3

2

1

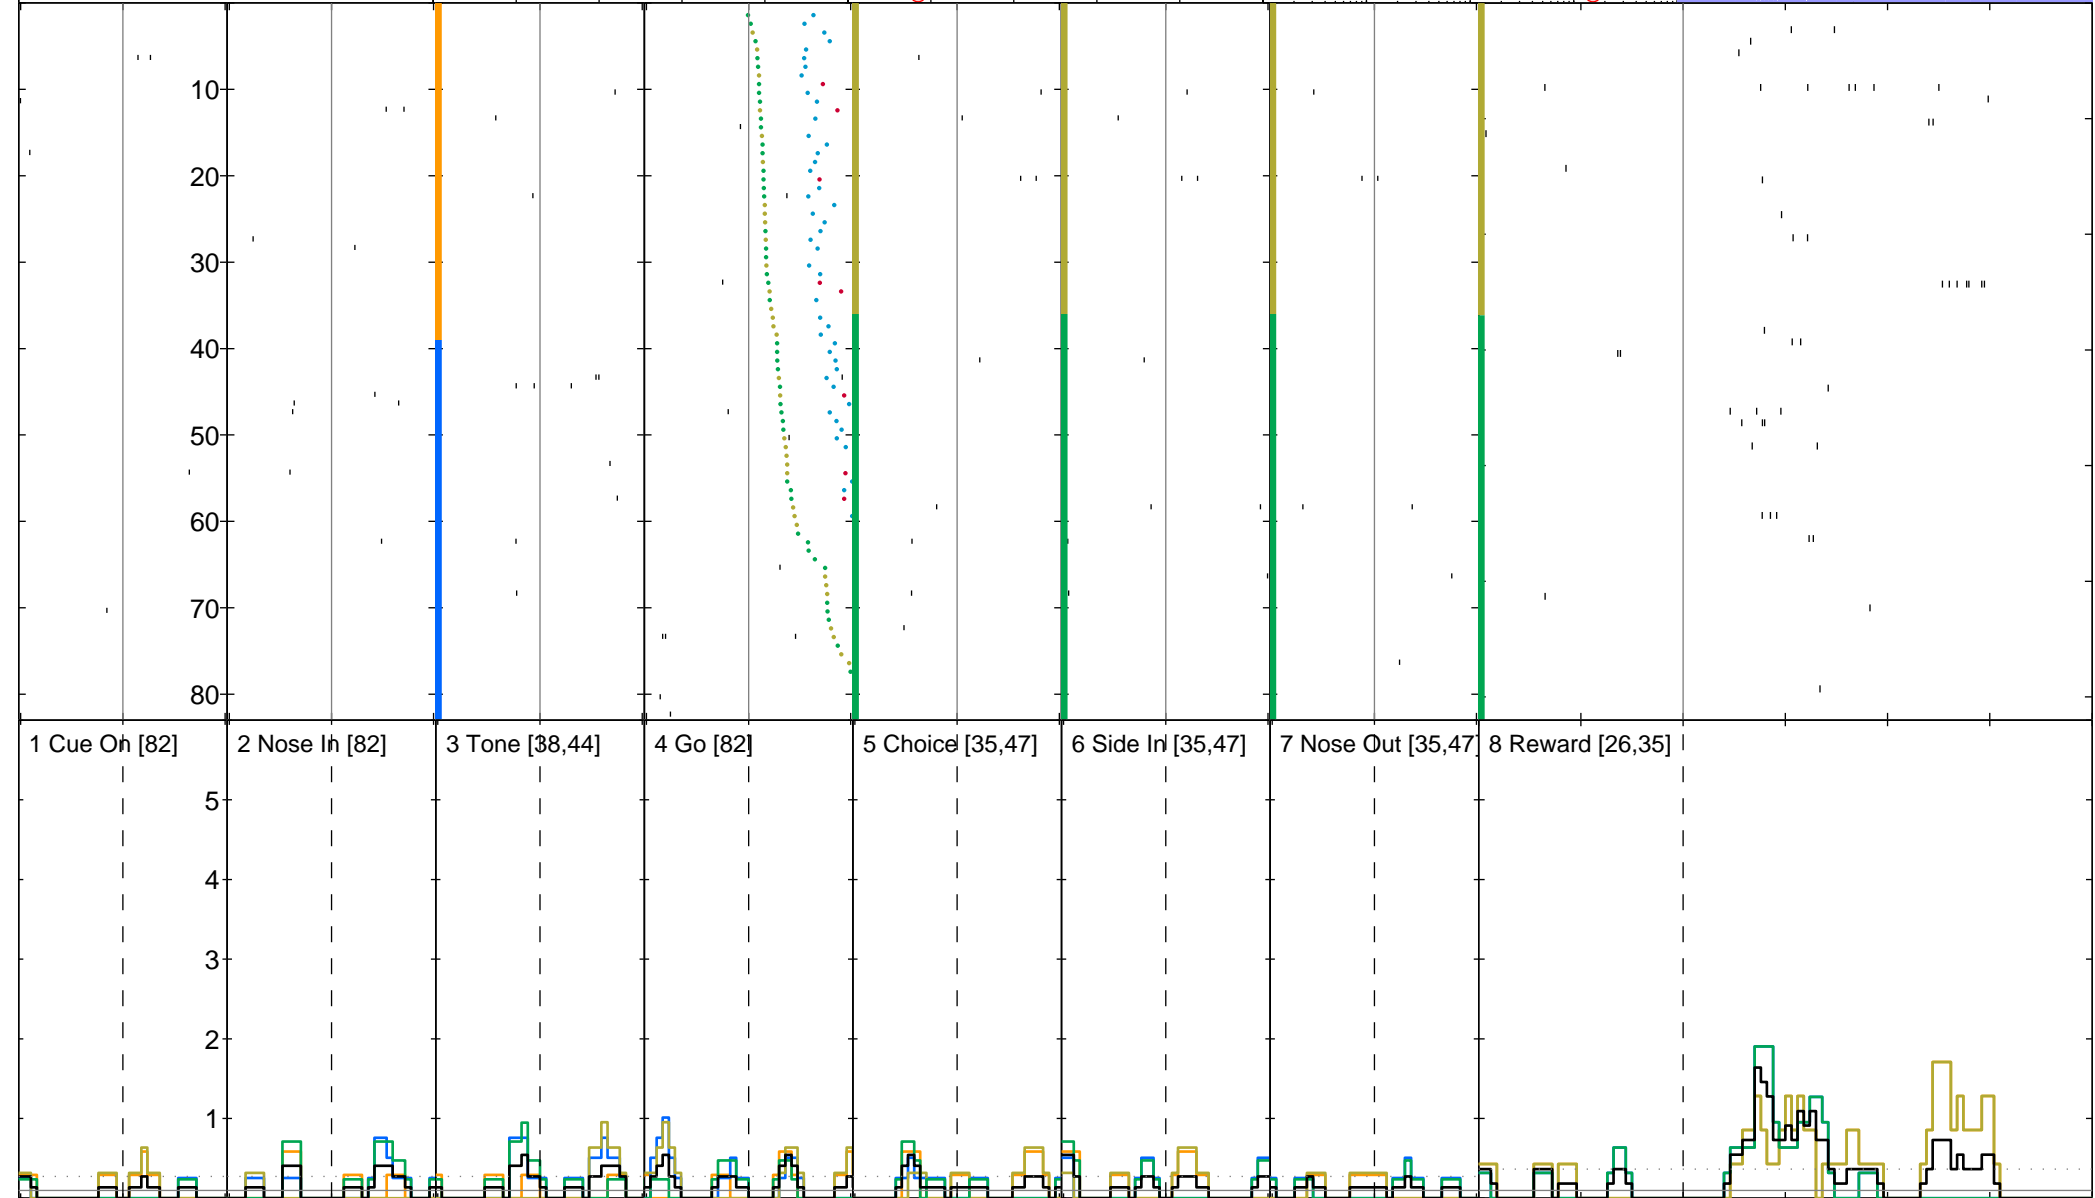

**Cell: C0320070630T09e**

AP: 1.6 ML: 3.7 DV: 6.2  
w: 2 n: 273  $P_{ISI>2}$ : 0.99  
1/2pw: 298 $\mu$ s p->v: 922 $\mu$ s  
 $\beta_T$ : NaN  $\beta_D$ : NaN  
 $\beta_P$ : NaN SI: NaN  
Session FR: 0.109 Hz  
Pk Ev: None  
Pk FR: --

MSN

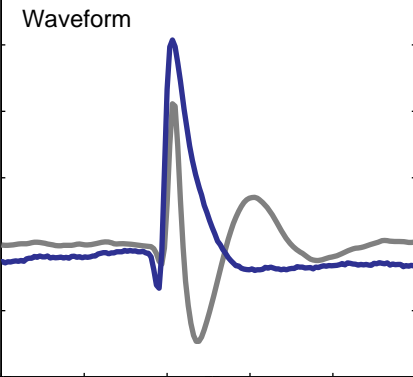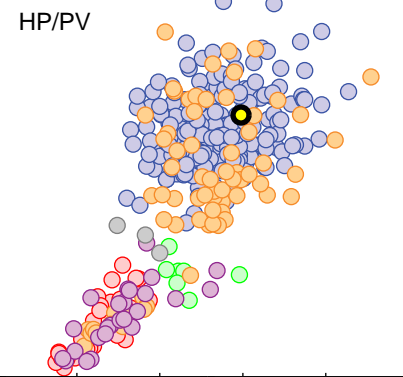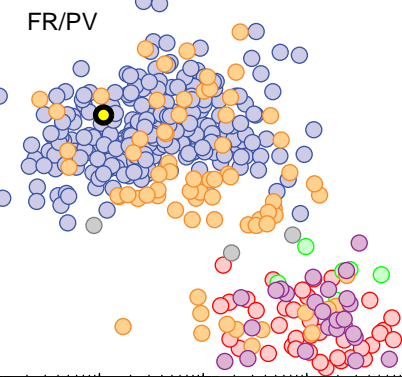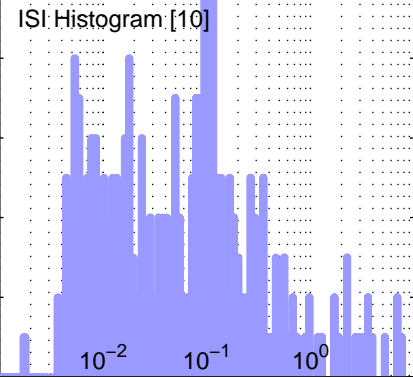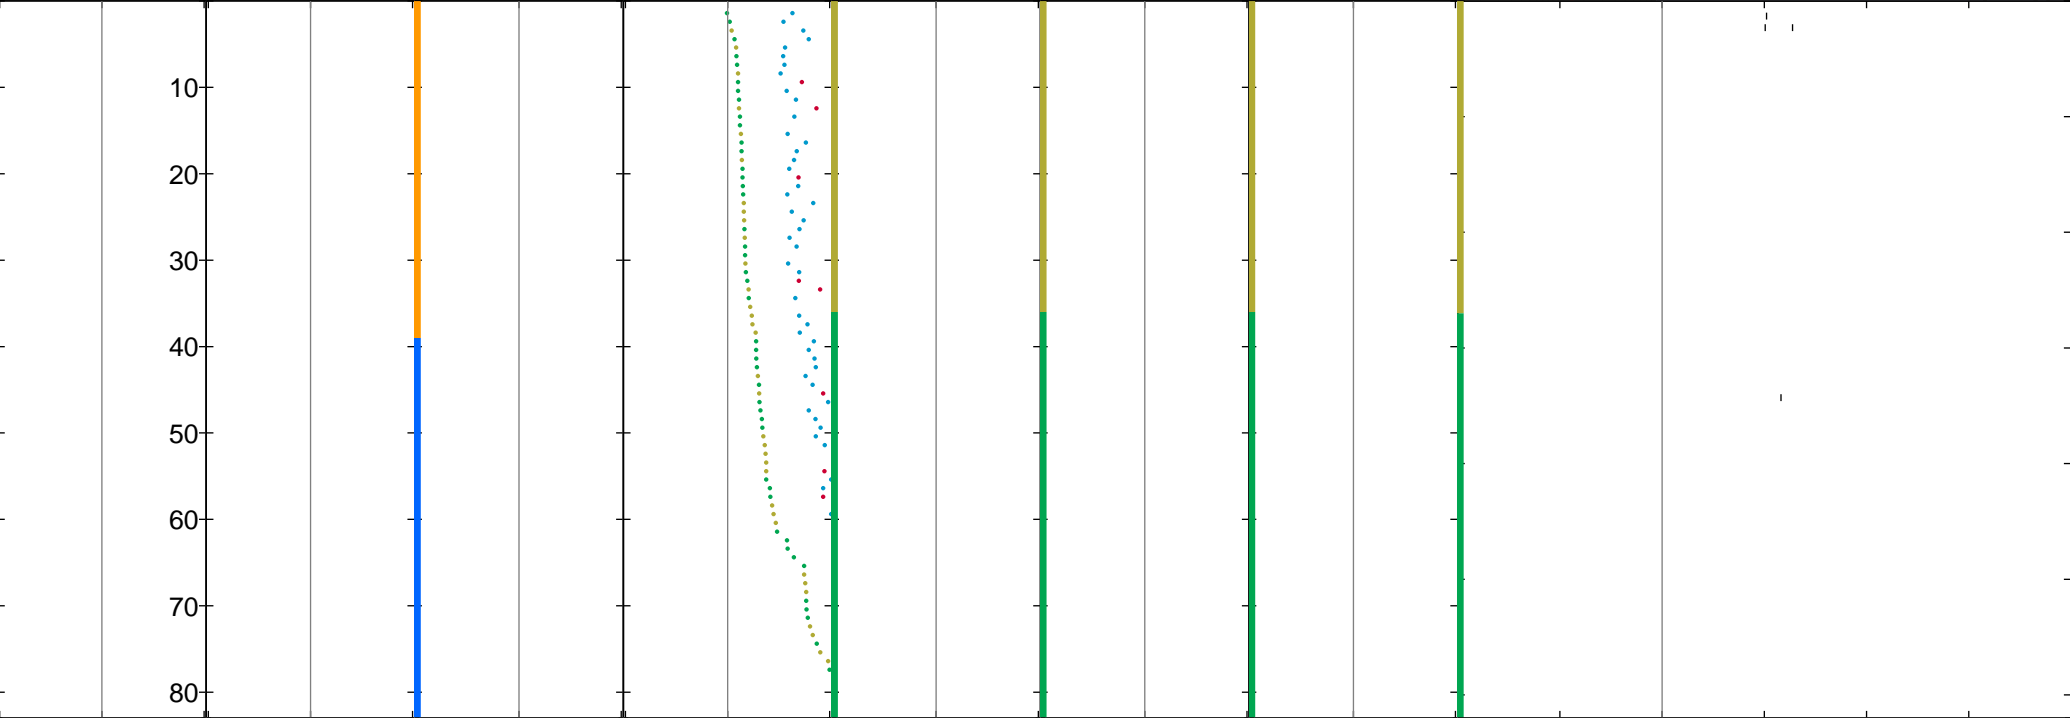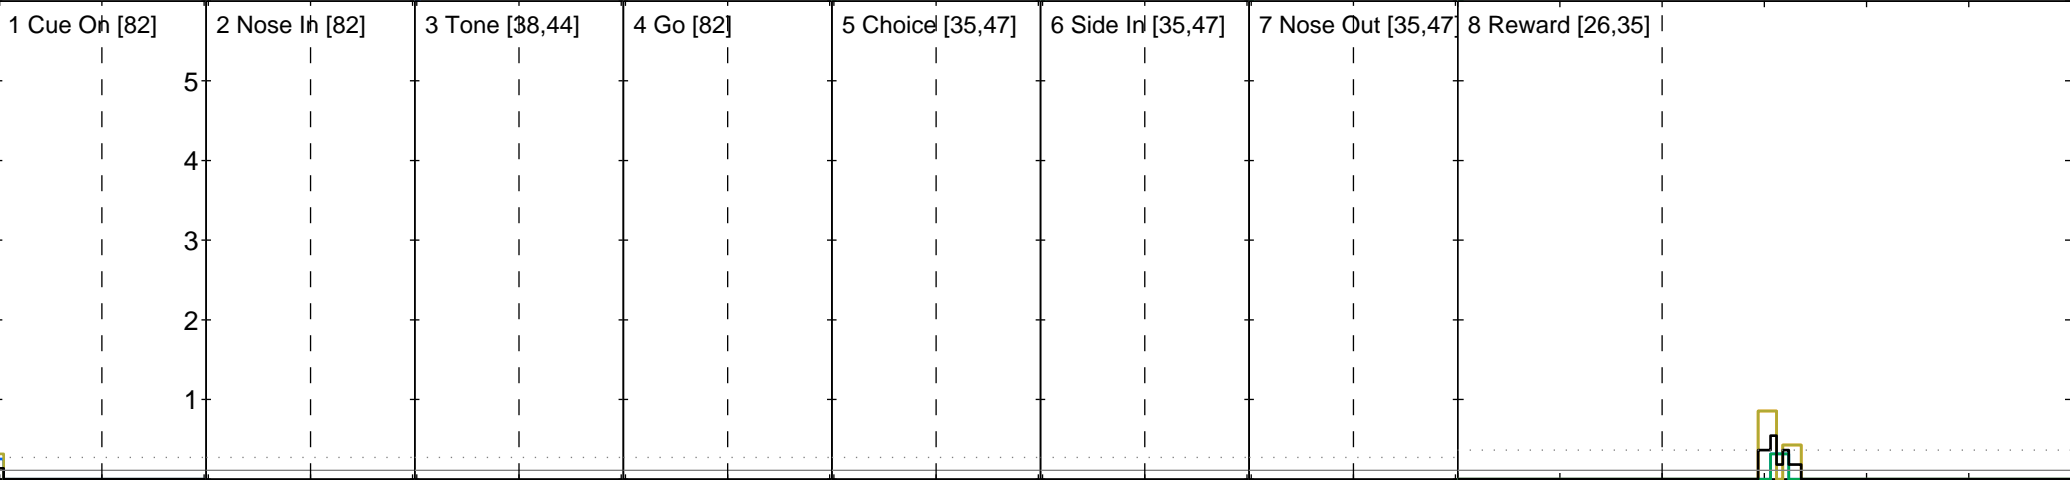

**Cell: C0320070630T09i**

AP: 1.6 ML: 3.7 DV: 6.2

w: 3 n: 780  $P_{ISI>2}$ : 0.931/2pw: 246 $\mu$ s p->v: 952 $\mu$ s $\beta_T$ : NaN  $\beta_D$ : NaN $\beta_P$ : NaN SI: NaN

Session FR: 0.257 Hz

Pk Ev: None

Pk FR: --

MSN

Waveform

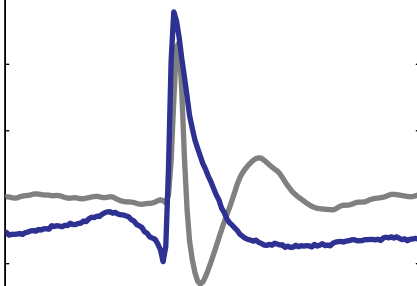

HP/PV

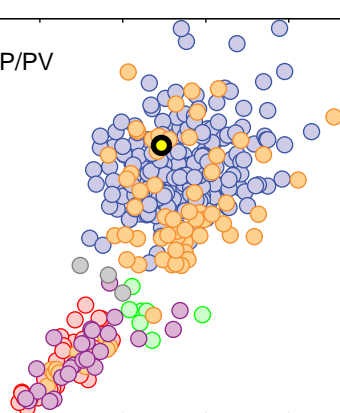

FR/PV

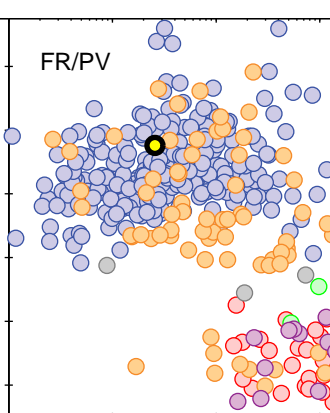

ISI Histogram [20]

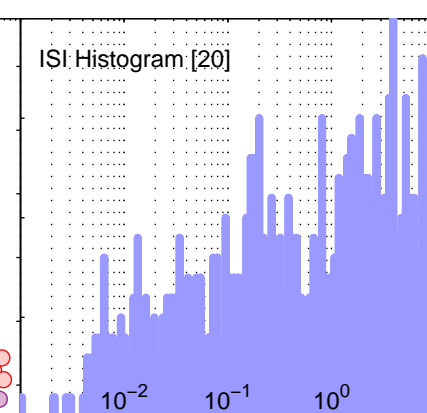

10

20

30

40

50

60

70

80

1 Cue On [82]

2 Nose In [82]

3 Tone [38,44]

4 Go [82]

5 Choice [35,47]

6 Side In [35,47]

7 Nose Out [35,47]

8 Reward [26,35]

5

4

3

2

1

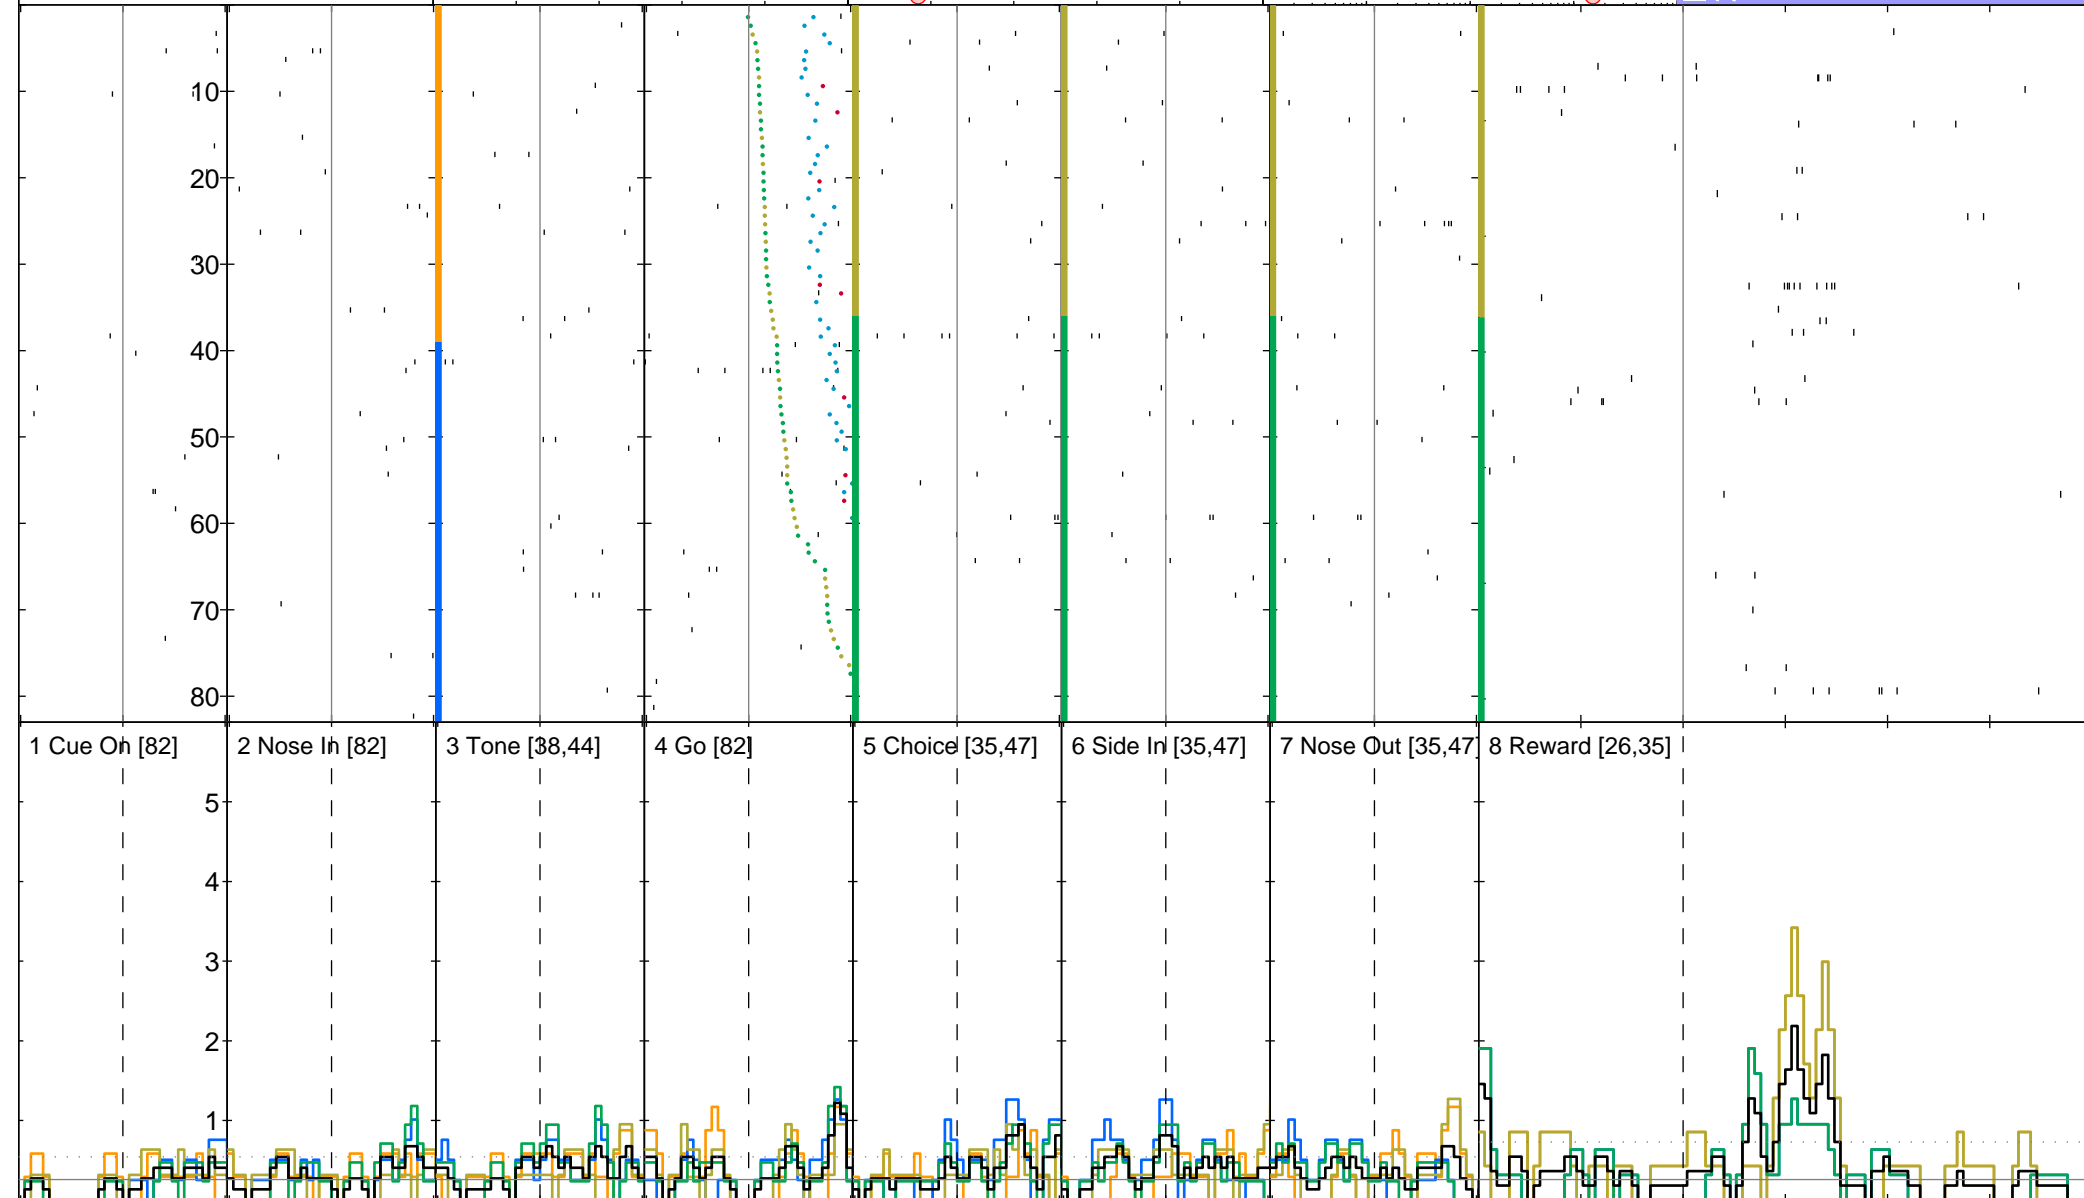

**Cell: C0320070630T11a**

AP: -0.96 ML: 3.7 DV: 7.1  
w: 1 n: 1461  $P_{ISI>2}$ : 0.86  
1/2pw: 302 $\mu$ s p->v: 746 $\mu$ s  
 $\beta_T$ : NaN  $\beta_D$ : NaN  
 $\beta_P$ : NaN SI: NaN  
Session FR: 0.482 Hz  
Pk Ev: None  
Pk FR: --

**MSN**

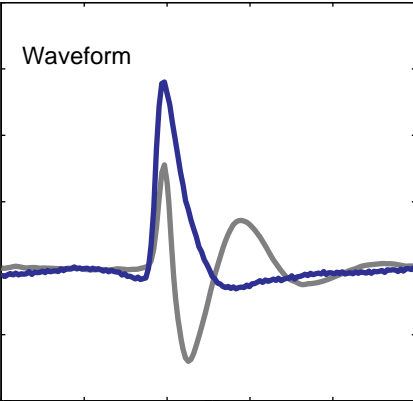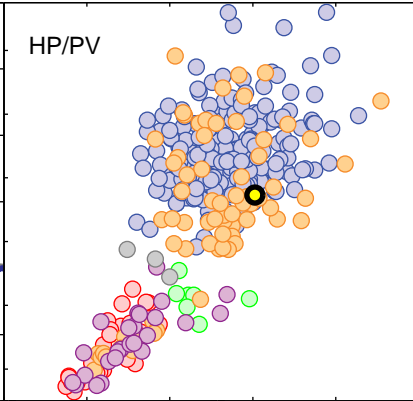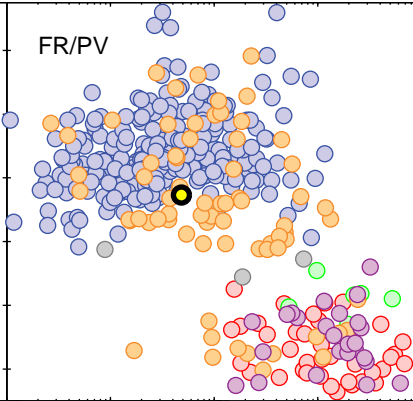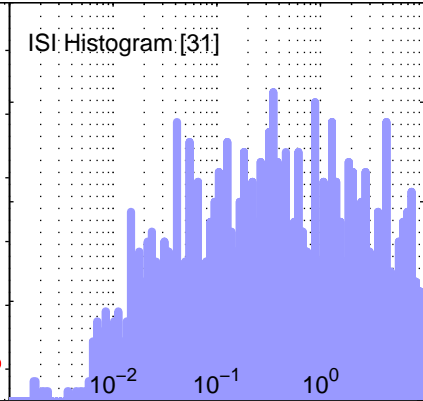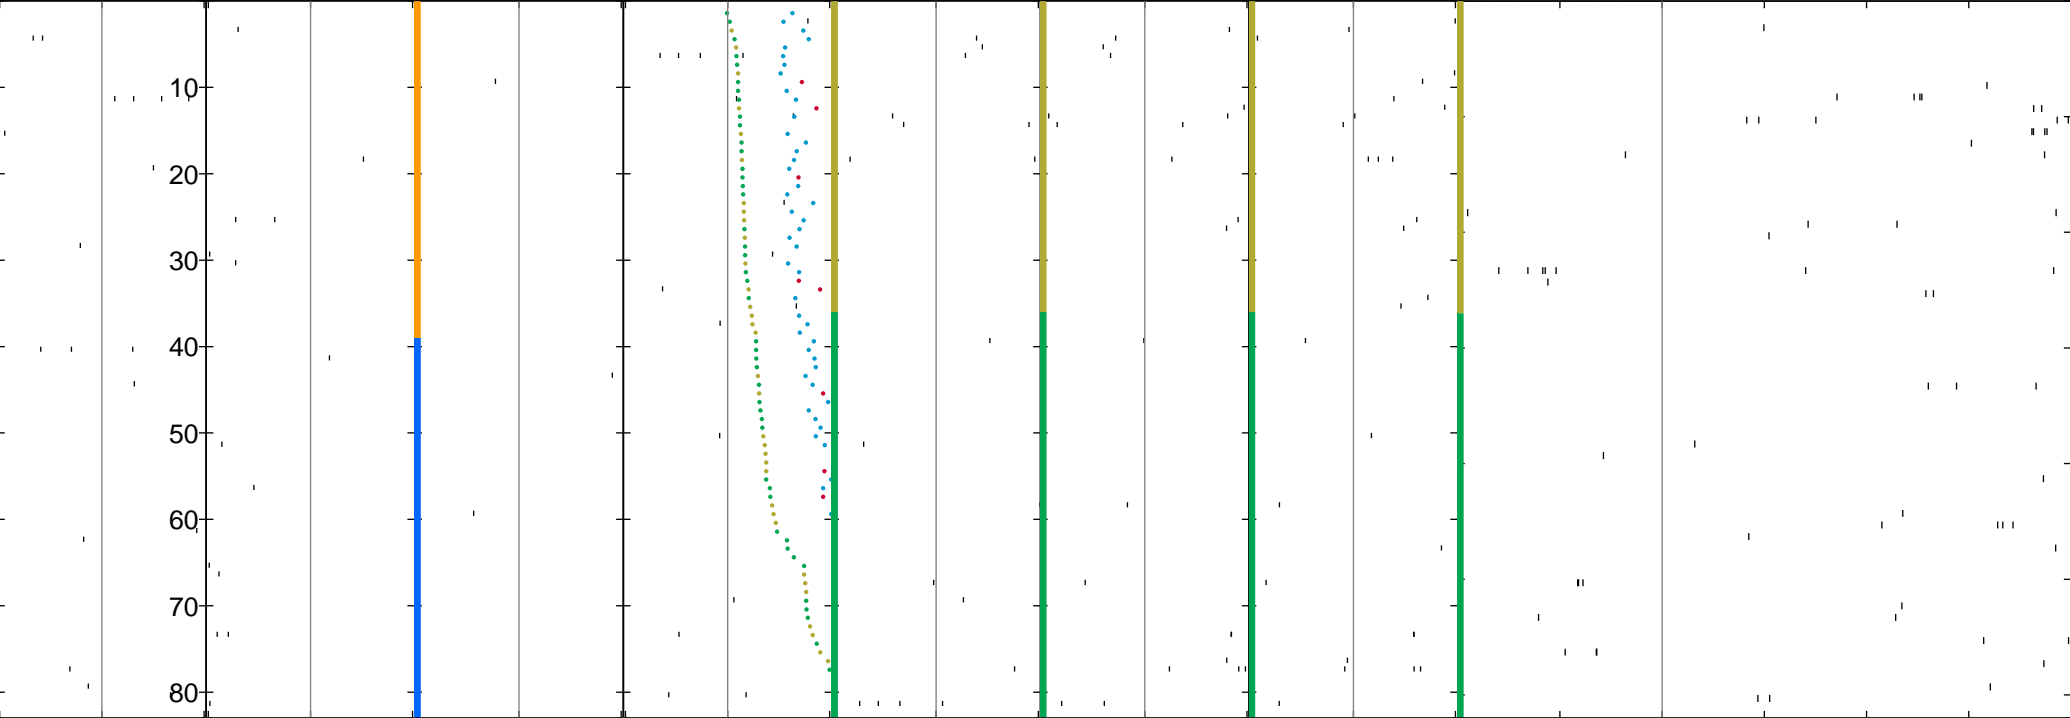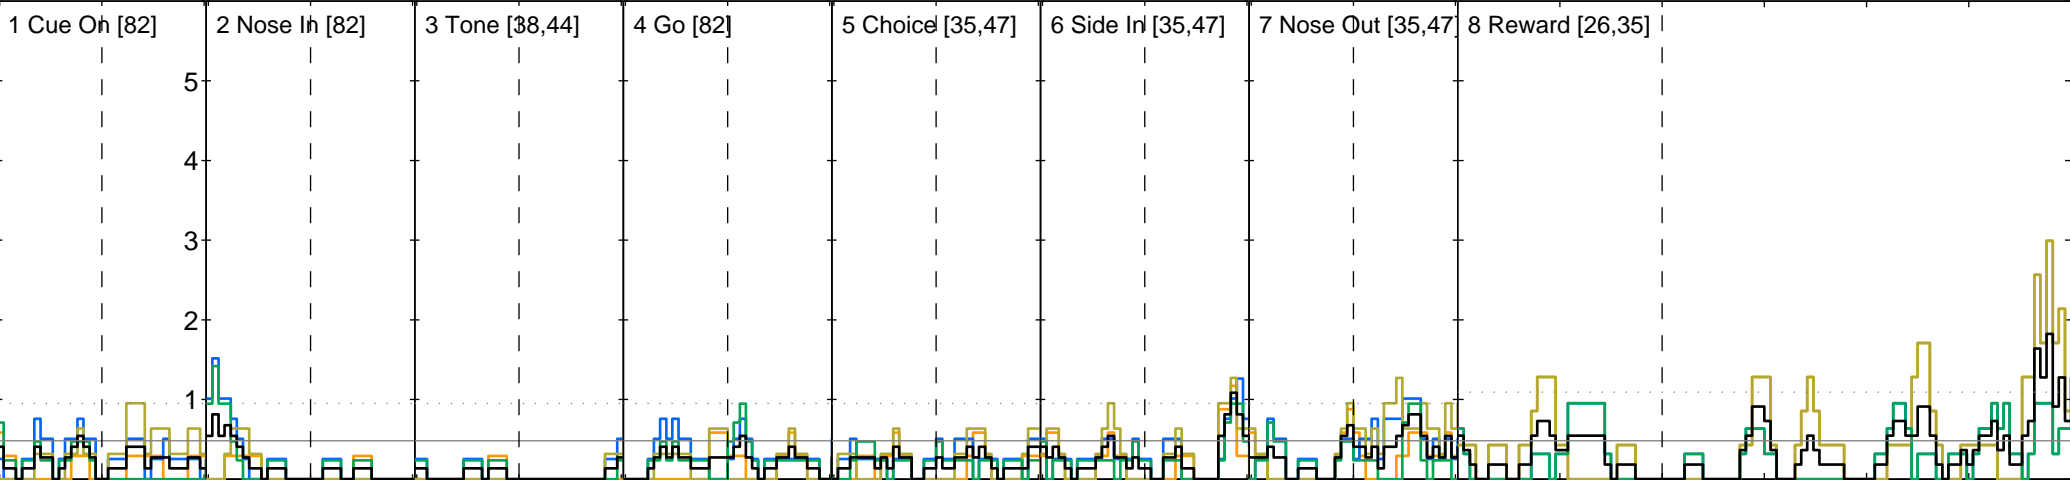



**Cell: C0320070630T11b**

AP: -0.96 ML: 3.7 DV: 7.1  
w: 4 n: 400  $P_{ISI>2}$ : 0.97  
1/2pw: 350 $\mu$ s p->v: 763 $\mu$ s  
 $\beta_T$ : NaN  $\beta_D$ : NaN  
 $\beta_P$ : NaN SI: NaN  
Session FR: 0.132 Hz  
Pk Ev: None  
Pk FR: --

MSN

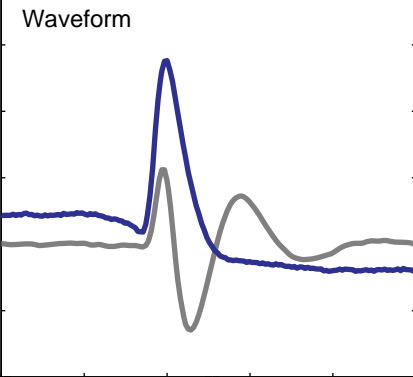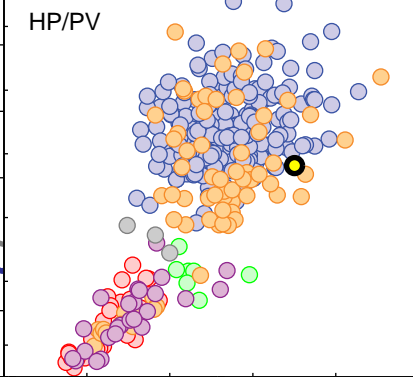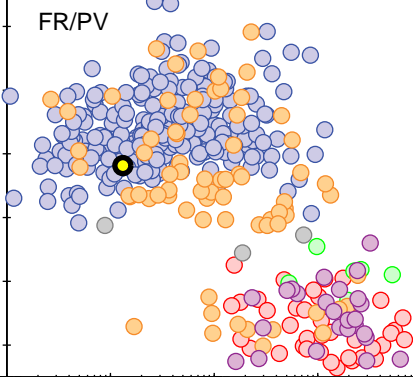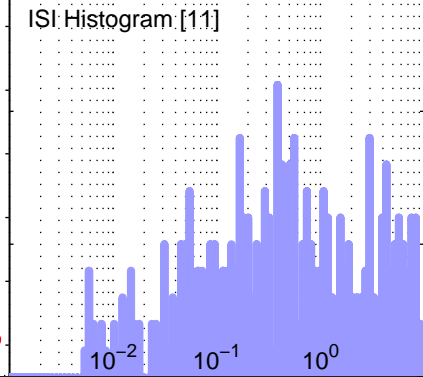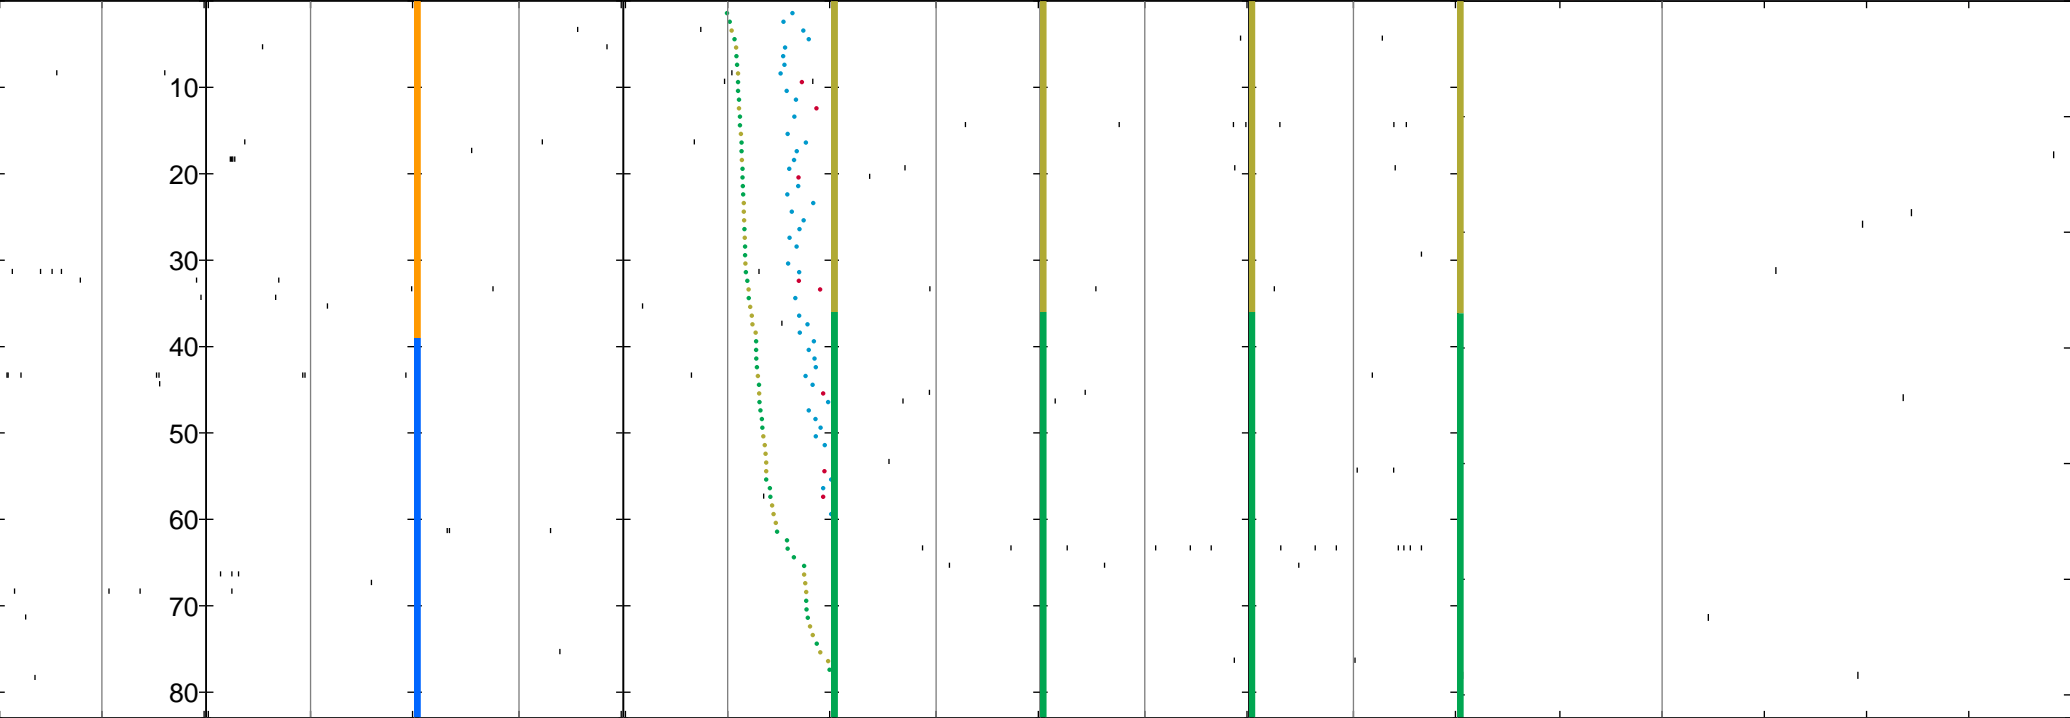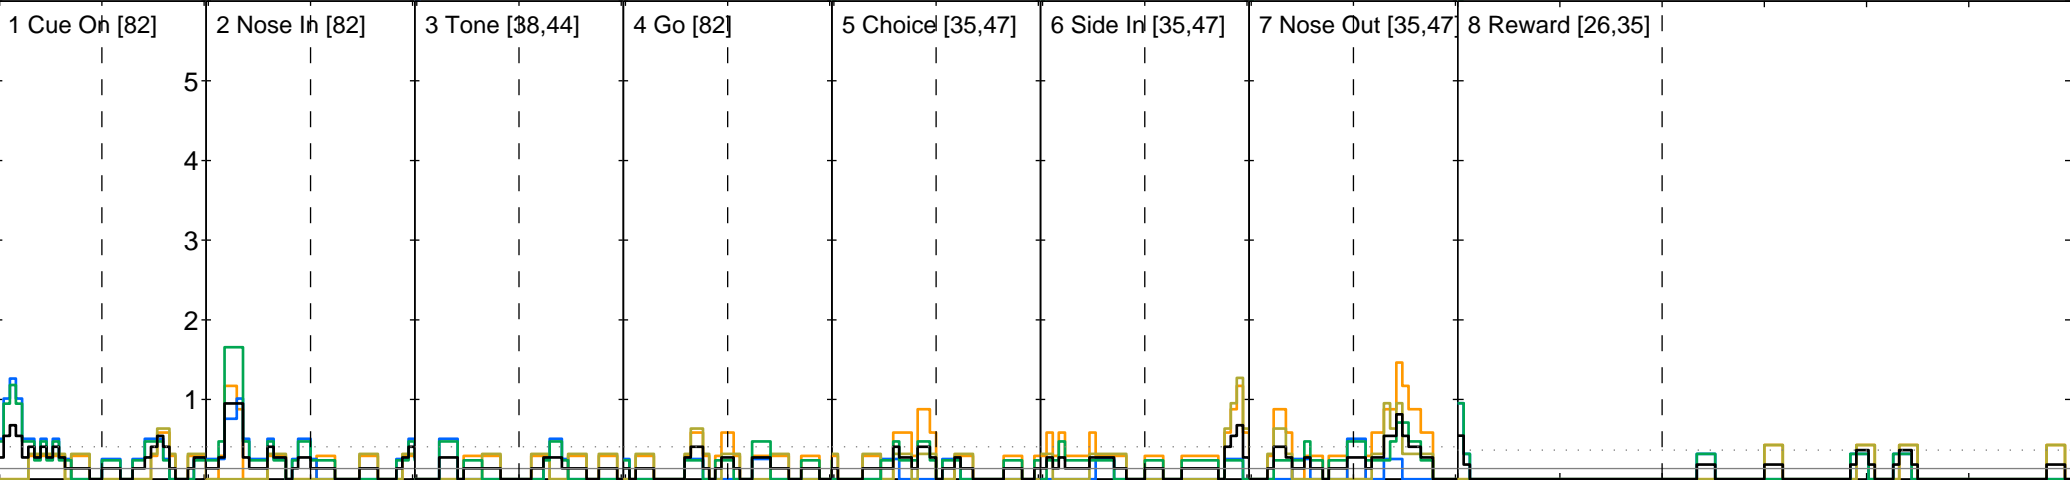

**Cell: C0320070630T11c**

AP: -0.96 ML: 3.7 DV: 7.1  
w: 2 n: 76  $P_{ISI>2}$ : 1  
1/2pw: 280 $\mu$ s p->v: 651 $\mu$ s  
 $\beta_T$ : NaN  $\beta_D$ : NaN  
 $\beta_P$ : NaN SI: NaN  
Session FR: 0.0249 Hz  
Pk Ev: None  
Pk FR: --

MSN

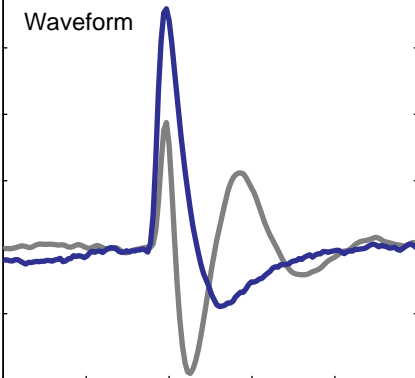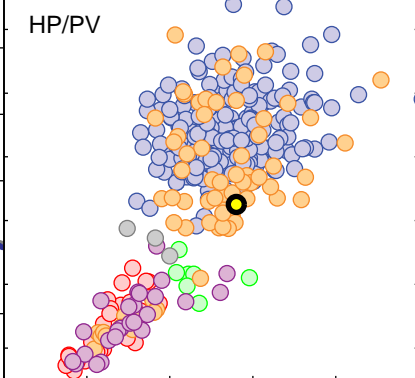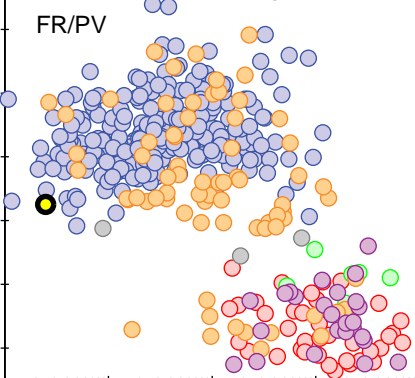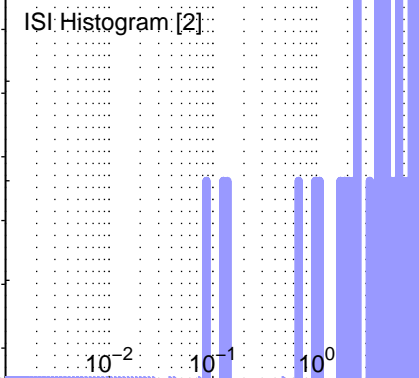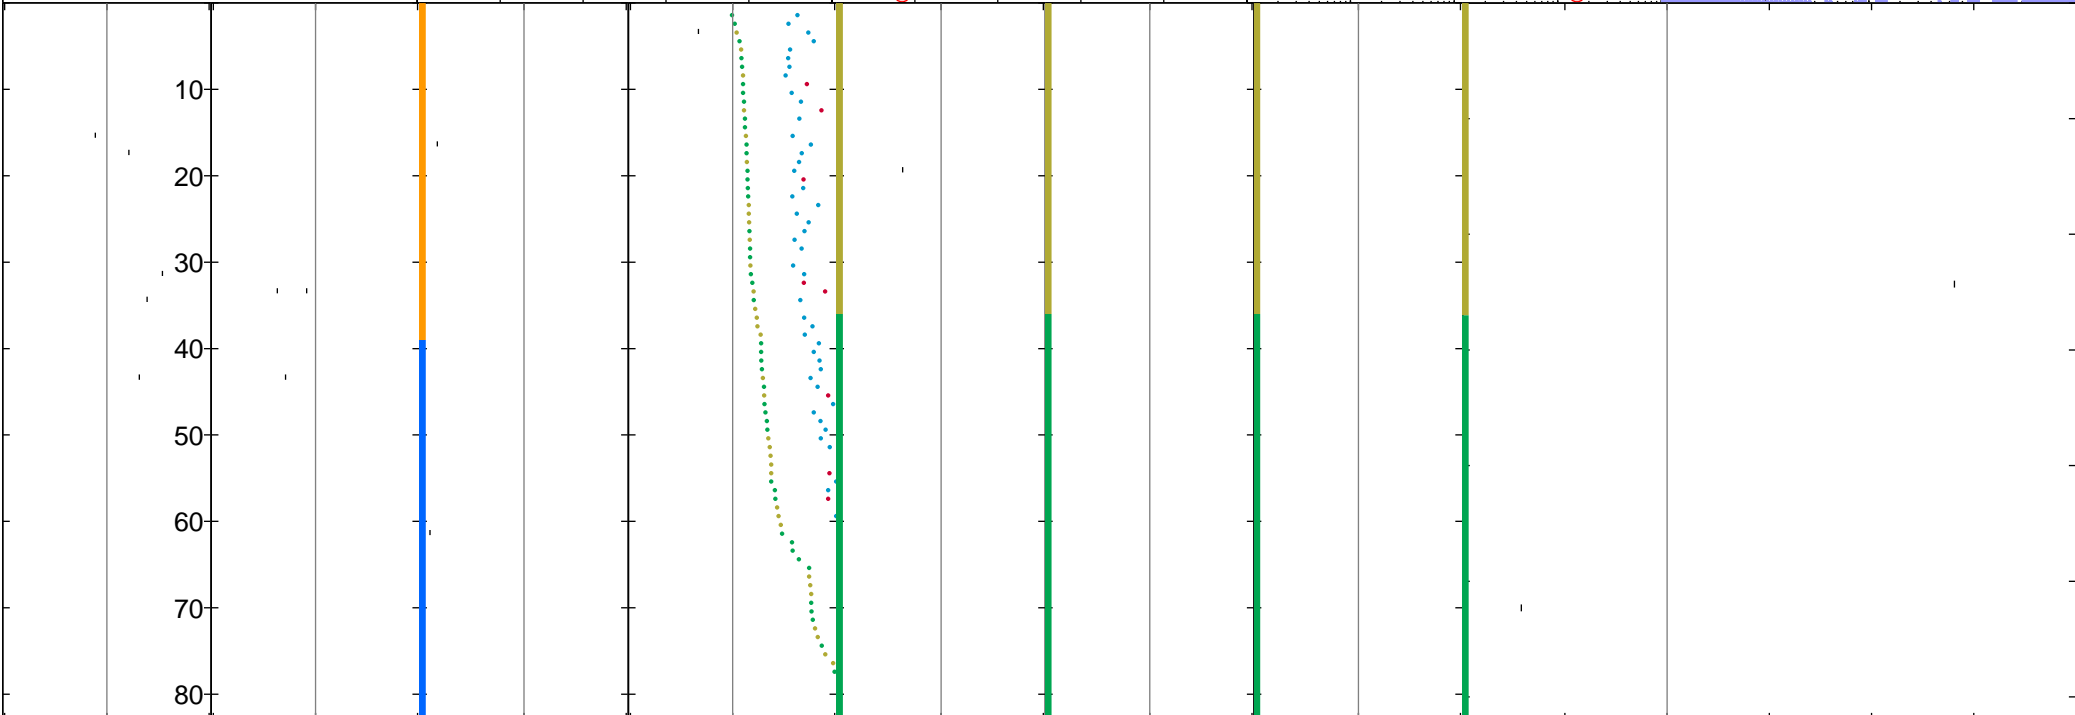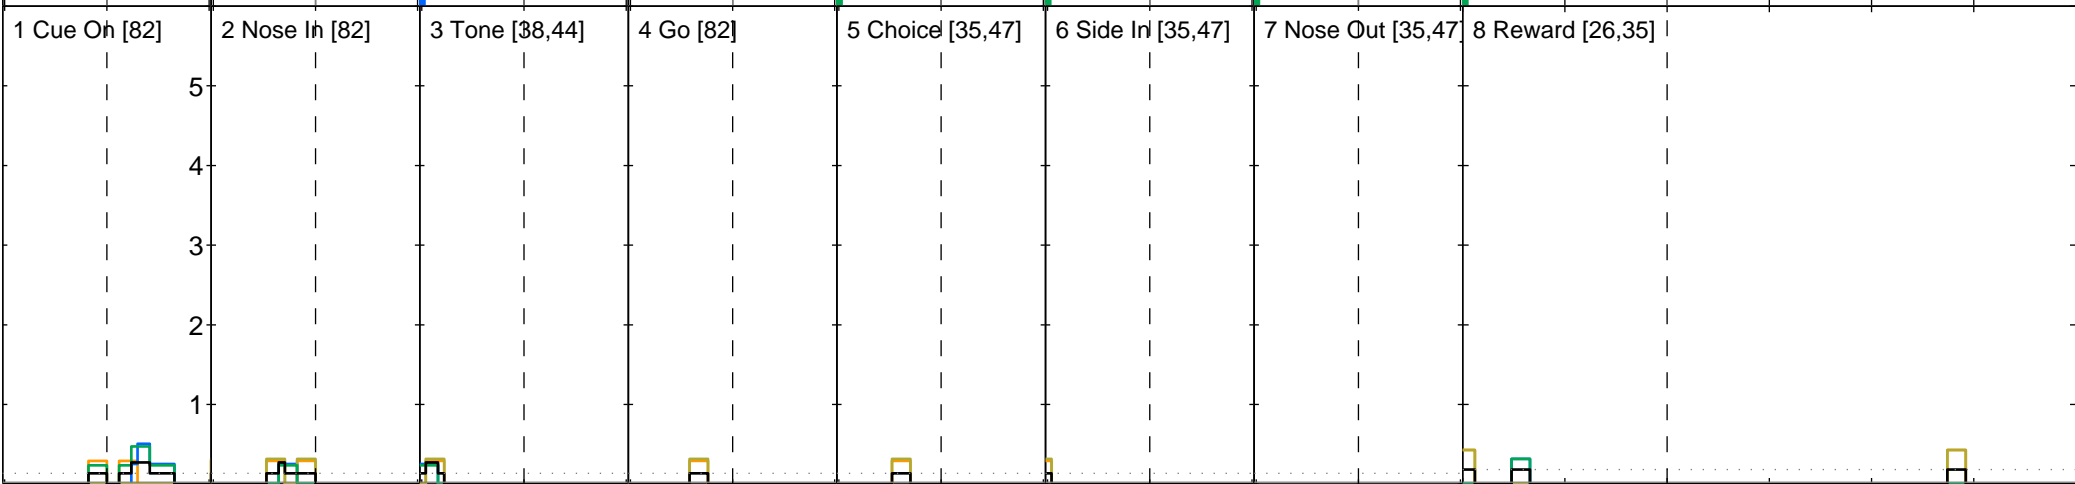

**Cell: C0320070630T11d**

AP: -0.96 ML: 3.7 DV: 7.1  
w: 2 n: 182  $P_{ISI>2}$ : 0.99  
1/2pw: 254 $\mu$ s p->v: 758 $\mu$ s  
 $\beta_T$ : NaN  $\beta_D$ : NaN  
 $\beta_P$ : NaN SI: NaN  
Session FR: 0.0598 Hz  
Pk Ev: None  
Pk FR: --

MSN

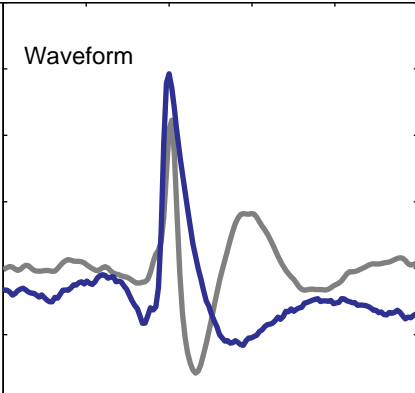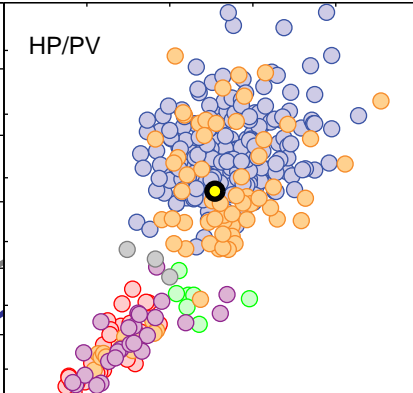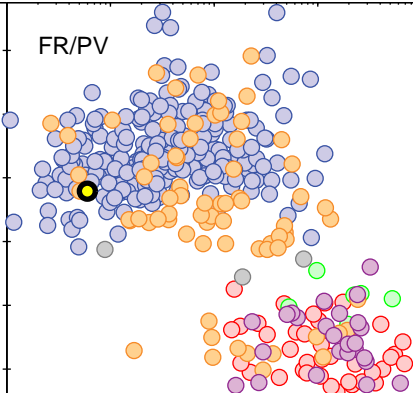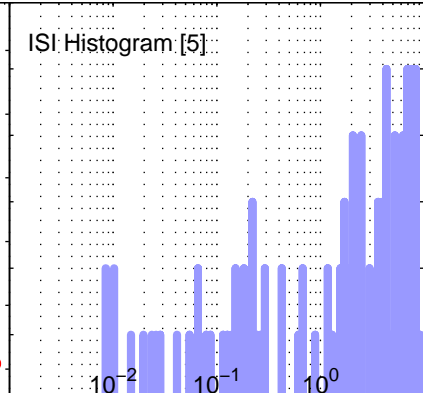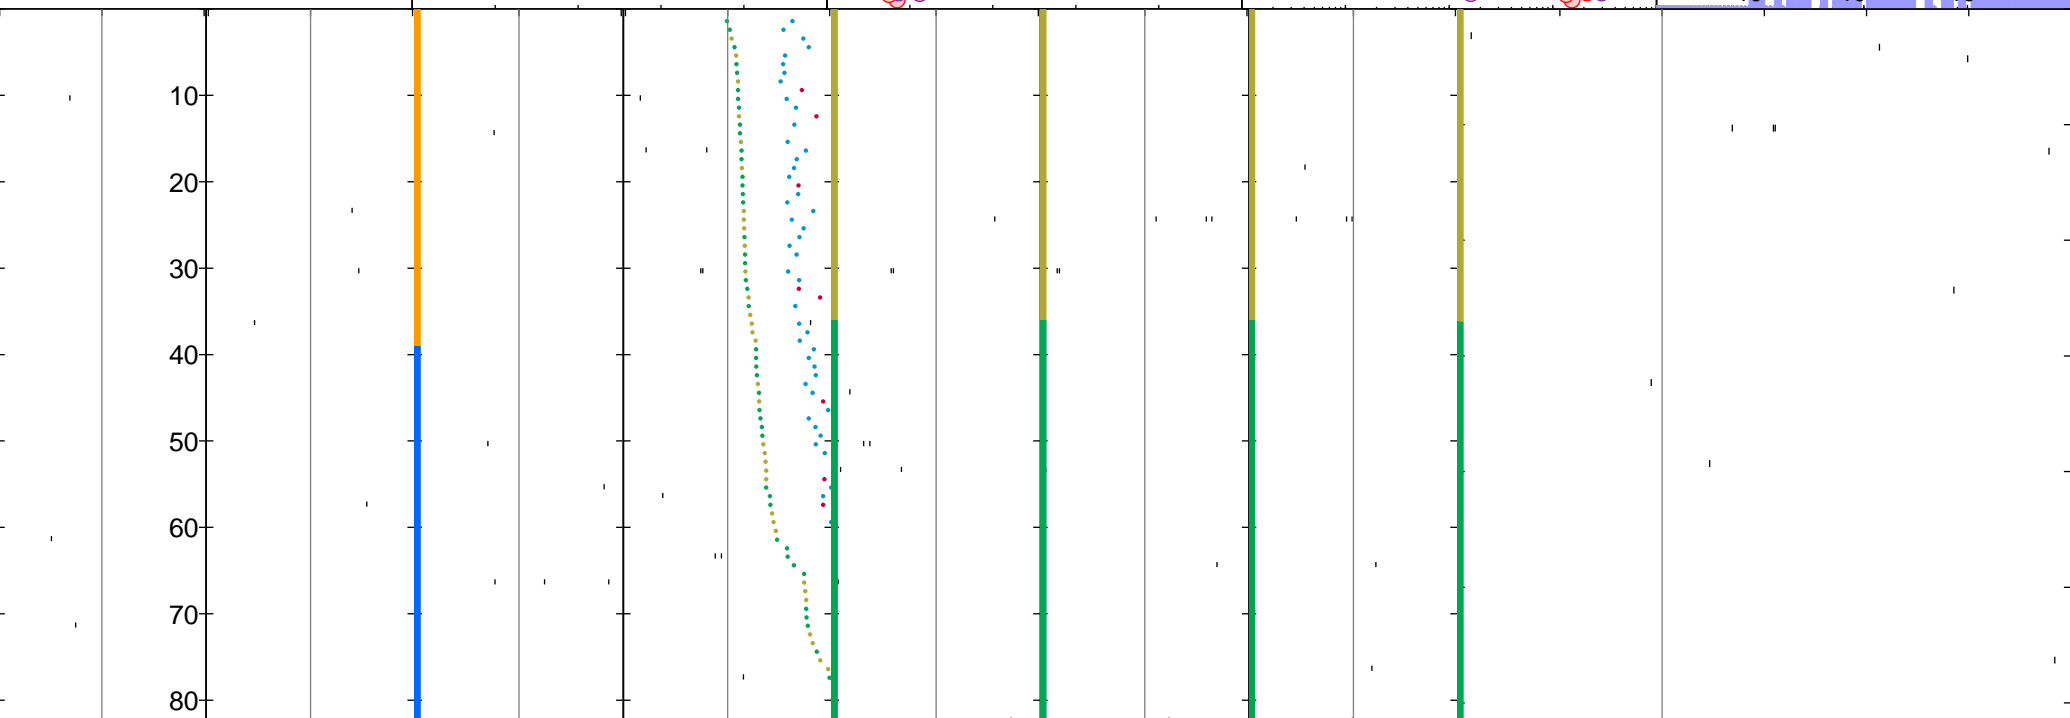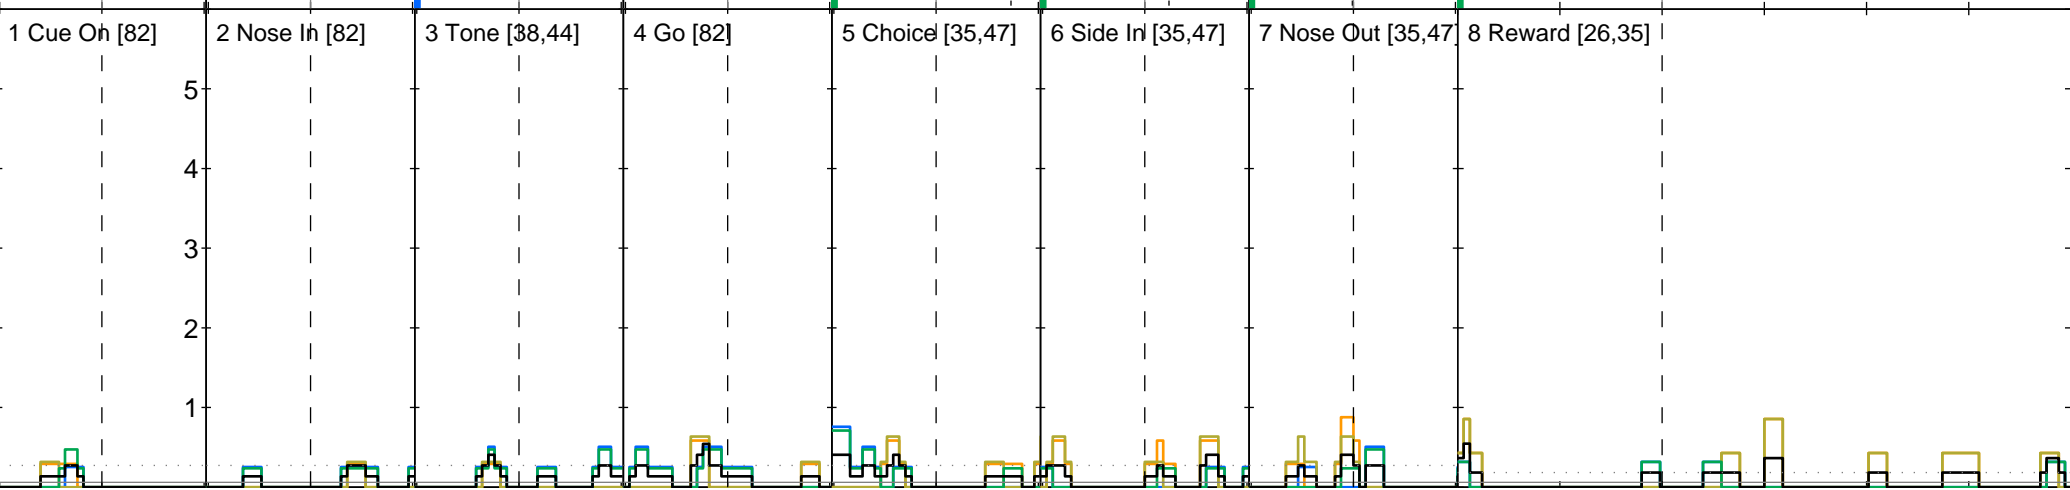

**Cell: C0320070630T11e**

AP: -0.96 ML: 3.7 DV: 7.1

w: 1 n: 359  $P_{ISI>2}$ : 0.97

1/2pw: 272 $\mu$ s p->v: 624 $\mu$ s

$\beta_T$ : NaN  $\beta_D$ : NaN

$\beta_P$ : NaN SI: NaN

Session FR: 0.118 Hz

Pk Ev: None

Pk FR: --

MSN

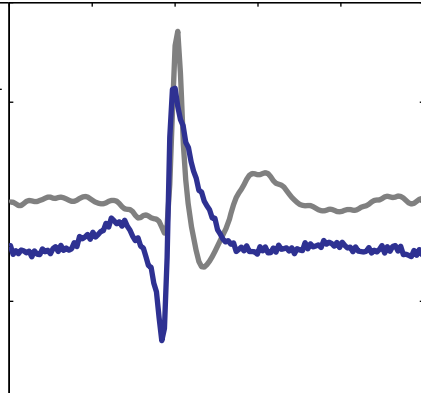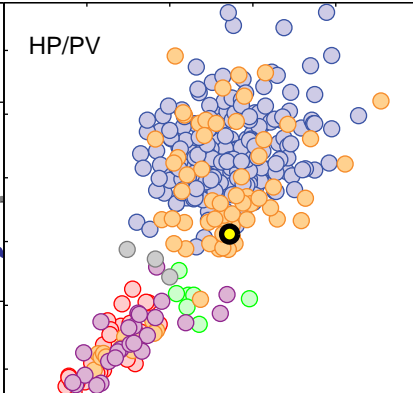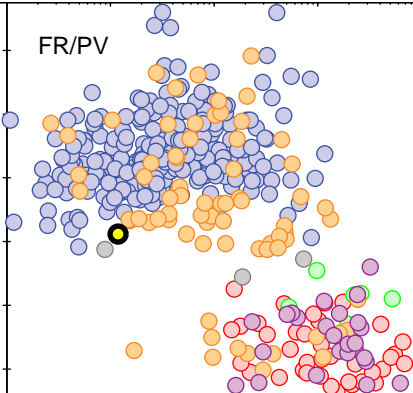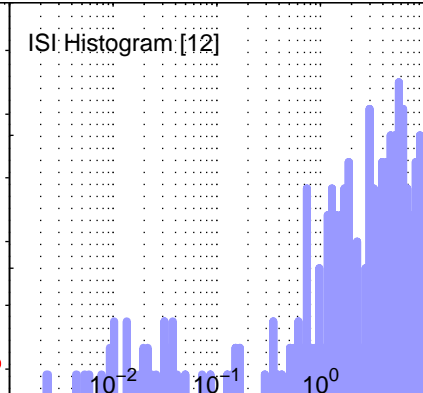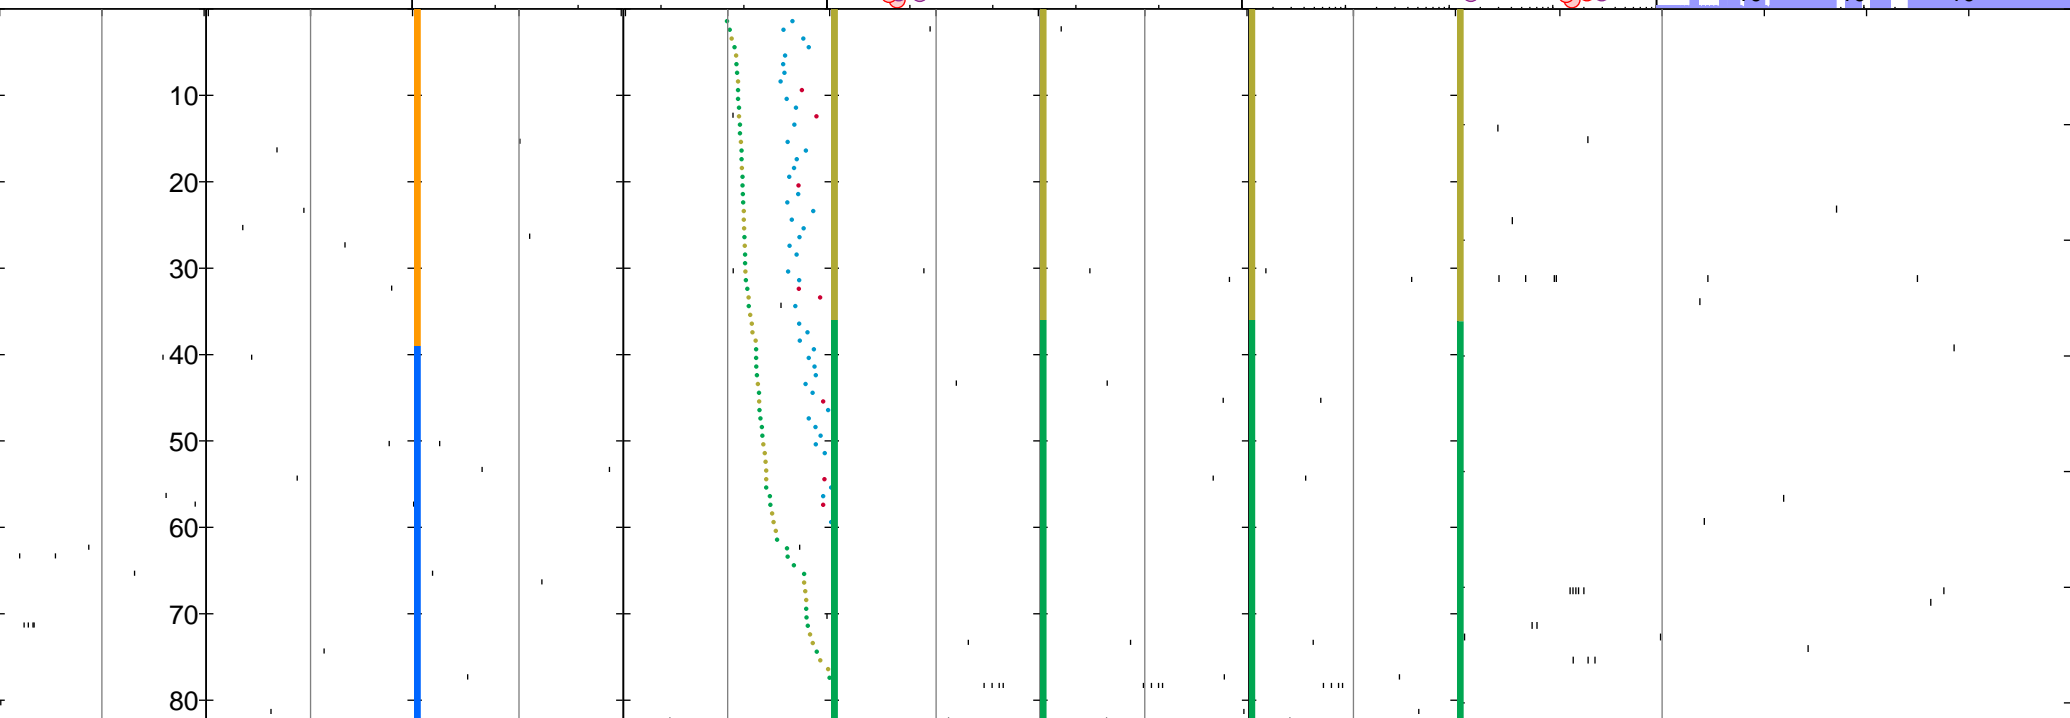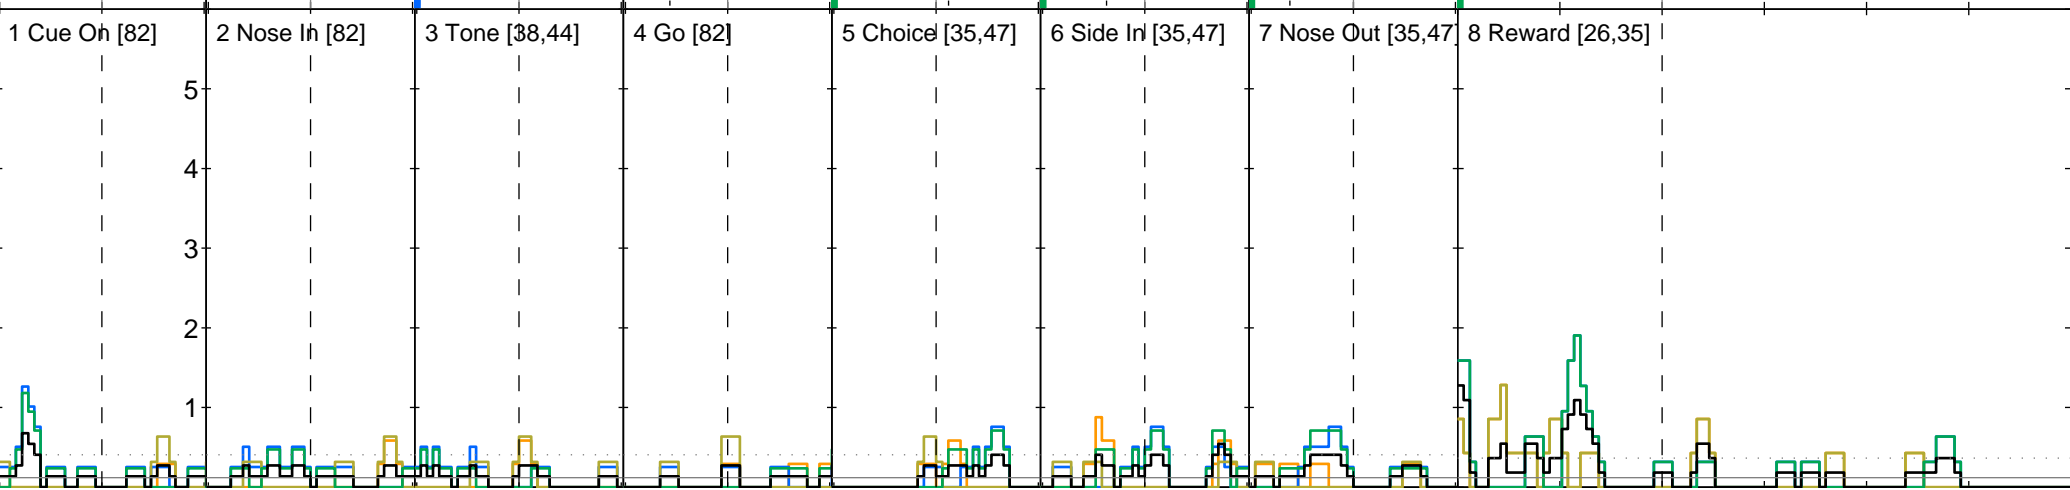

**Cell: C0320070701T07a**

AP: 0.96 ML: 3.6 DV: 7.6

w: 3 n: 363  $P_{ISI>2}$ : 0.99

1/2pw: 243 $\mu$ s p->v: 787 $\mu$ s

$\beta_T$ : NaN  $\beta_D$ : NaN

$\beta_P$ : NaN SI: NaN

Session FR: 0.0651 Hz

Pk Ev: None

Pk FR: --

MSN

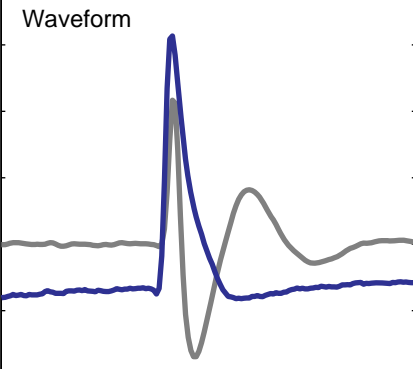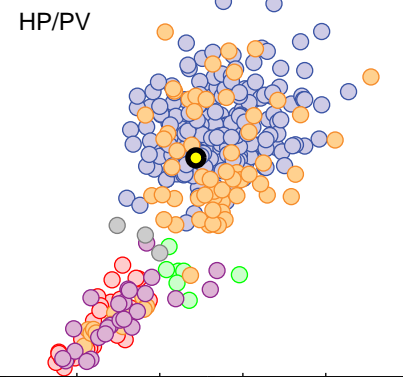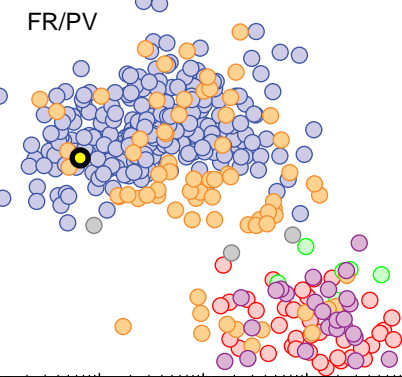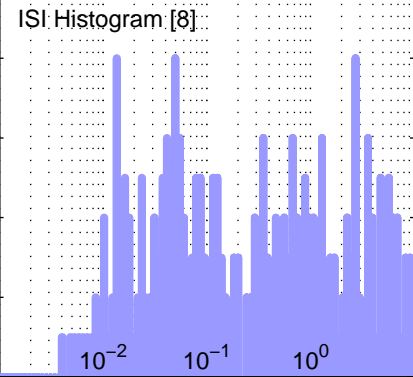

10  
20  
30  
40  
50  
60  
70  
80  
90  
100

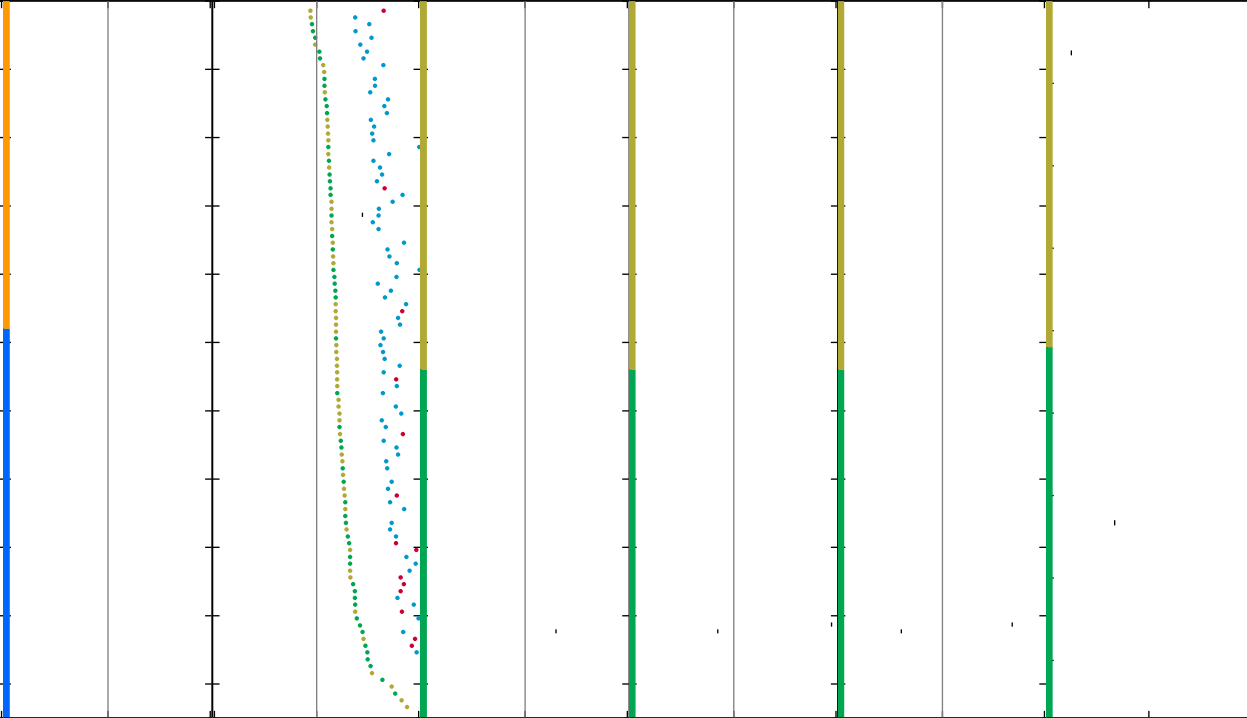

1 Cue On [104]

2 Nose In [104]

3 Tone [47,57]

4 Go [104]

5 Choice [53,51]

6 Side In [53,51]

7 Nose Out [53,51]

8 Reward [41,45]

5  
4  
3  
2  
1

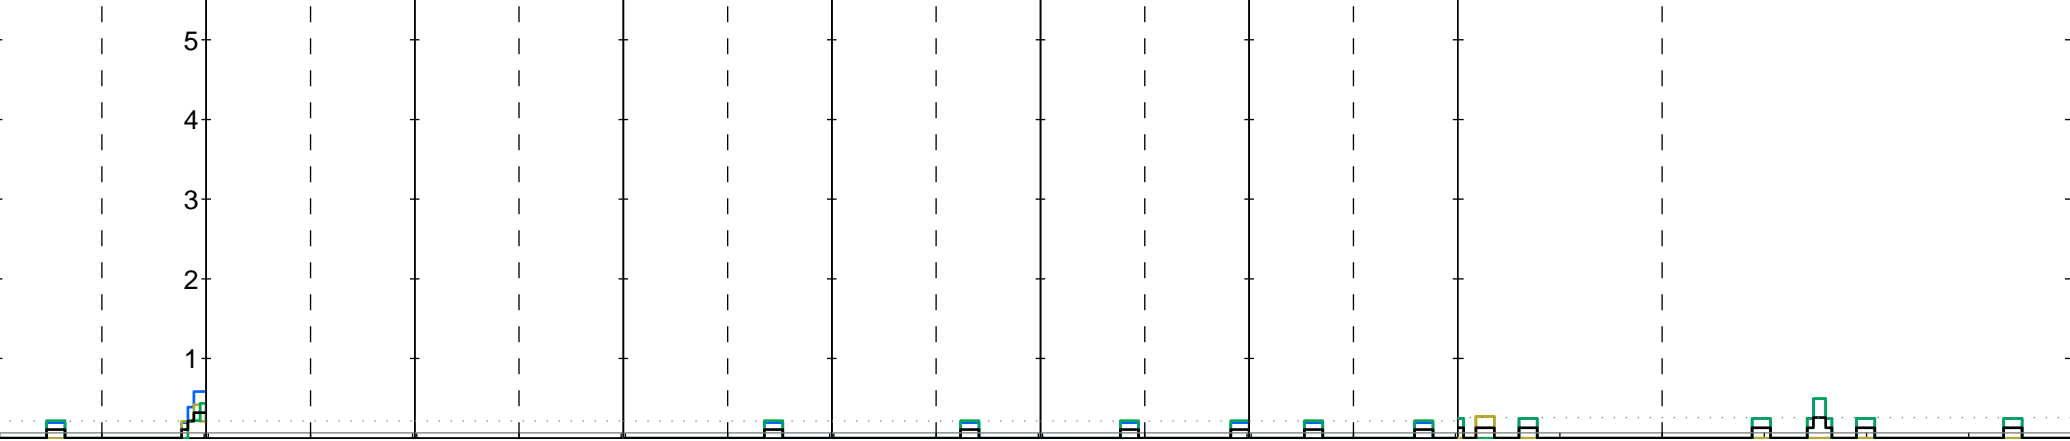

**Cell: C0320070701T07b**

AP: 0.96 ML: 3.6 DV: 7.6  
w: 4 n: 1179  $P_{ISI>2}$ : 0.95  
1/2pw: 222 $\mu$ s p->v: 802 $\mu$ s  
 $\beta_T$ : NaN  $\beta_D$ : NaN  
 $\beta_P$ : NaN SI: NaN  
Session FR: 0.211 Hz  
Pk Ev: None  
Pk FR: --

MSN

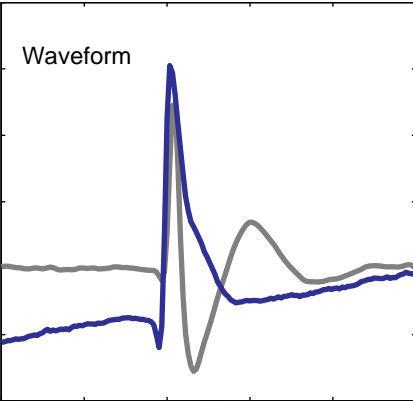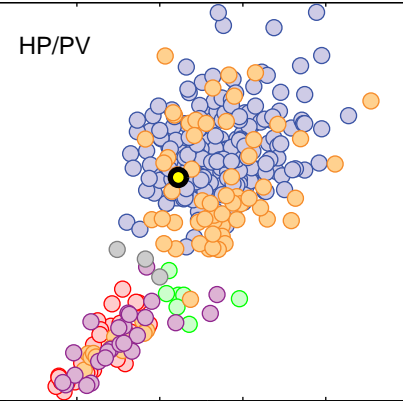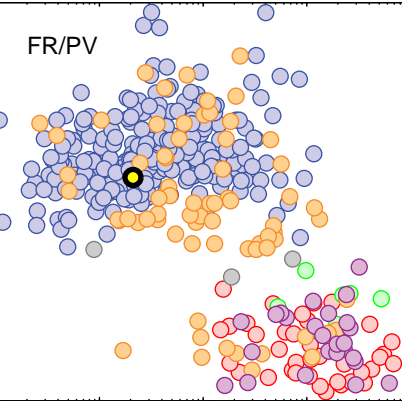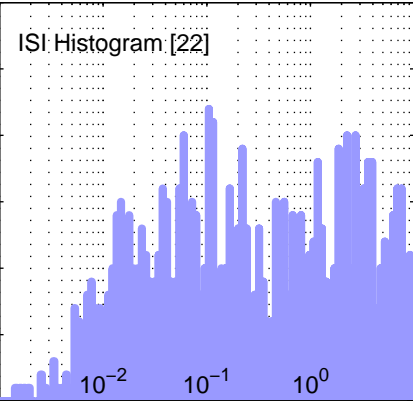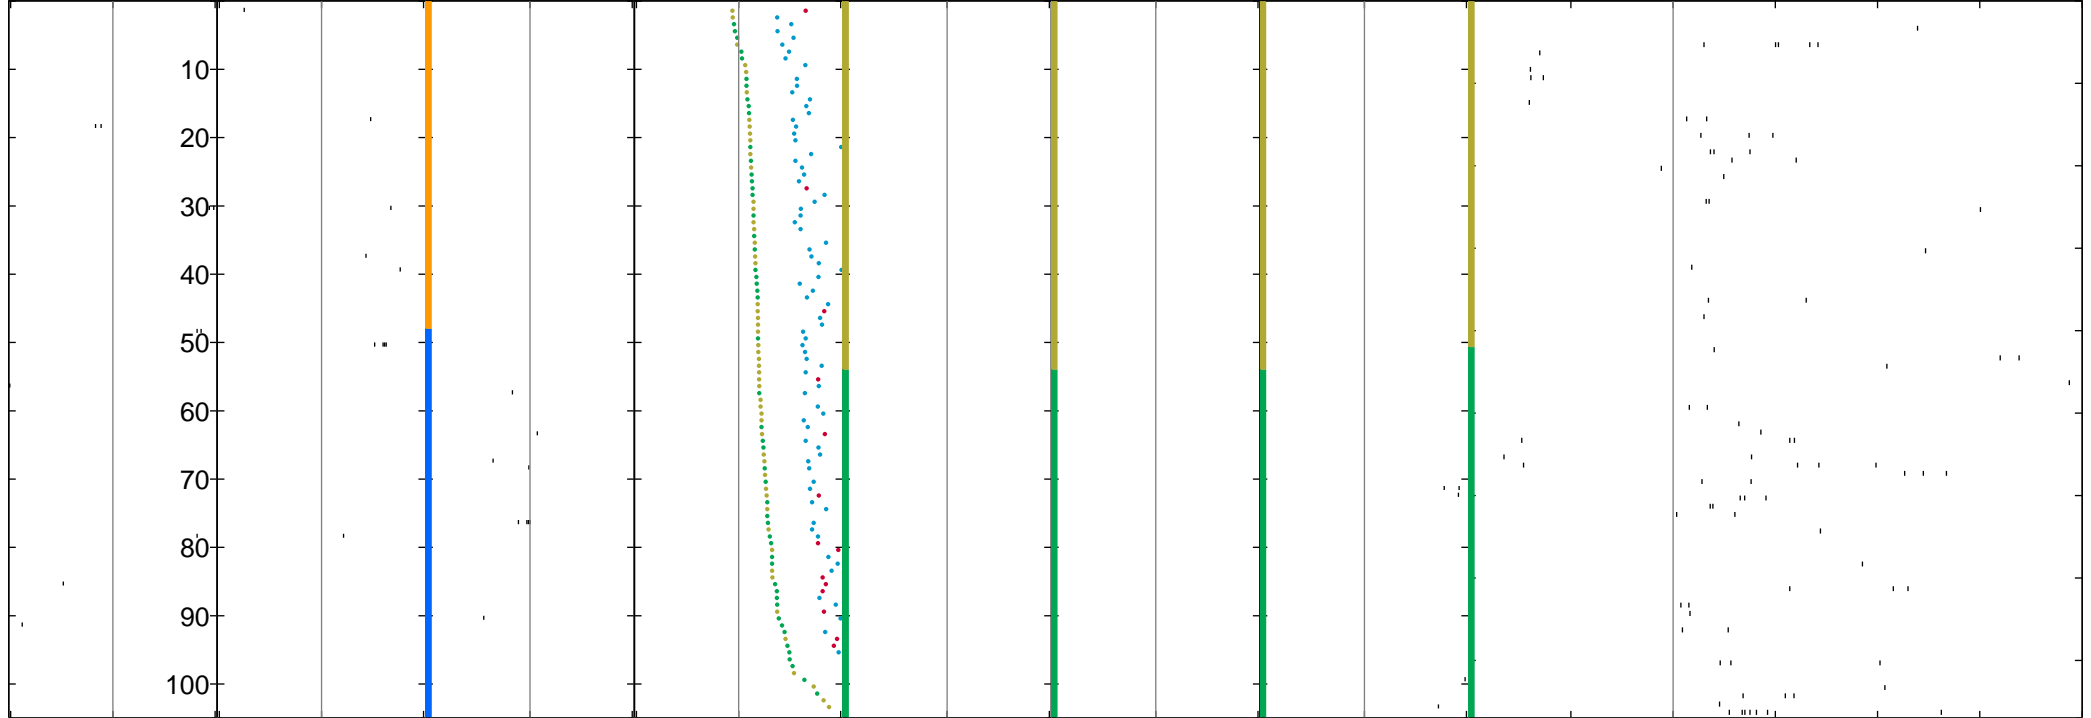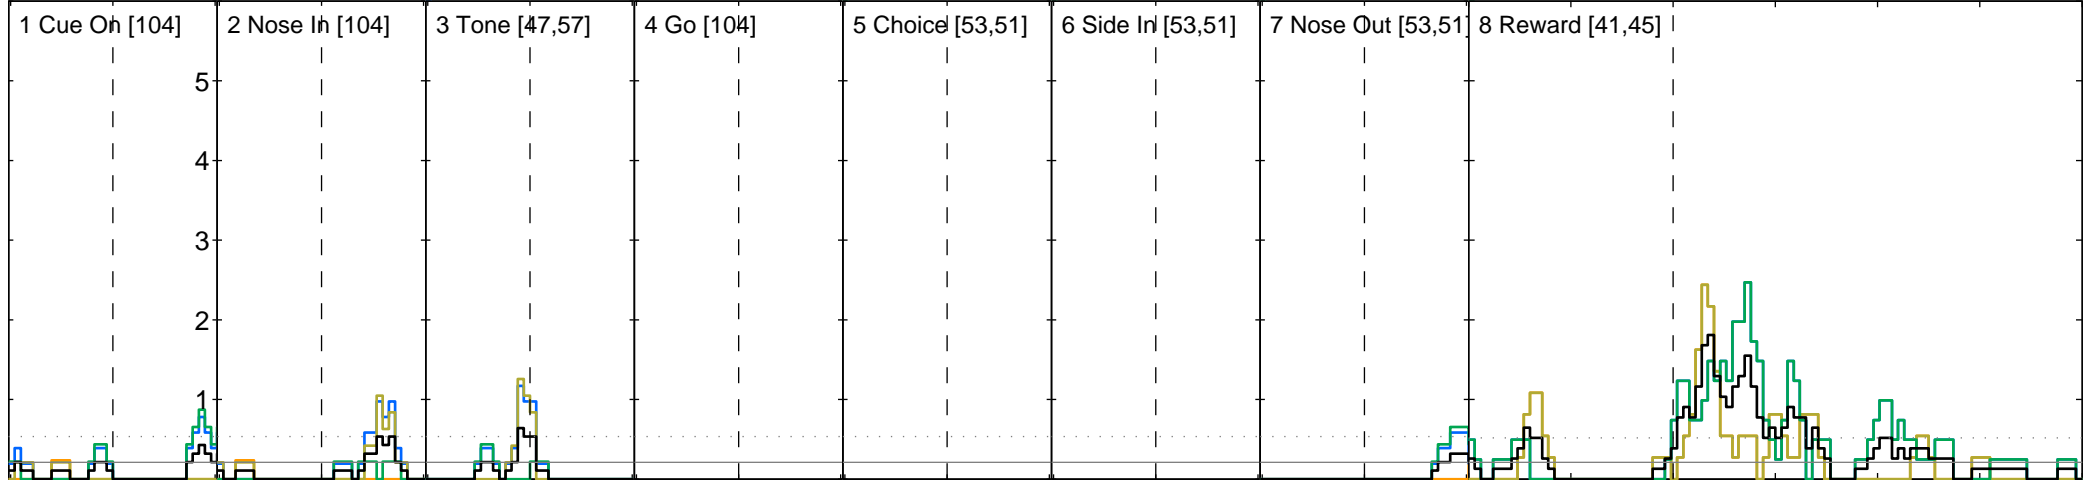

**Cell: C0320070701T09b**

AP: 1.6 ML: 3.7 DV: 6.3  
w: 4 n: 914  $P_{ISI>2}$ : 0.97  
1/2pw: 274 $\mu$ s p->v: 832 $\mu$ s  
 $\beta_T$ : NaN  $\beta_D$ : NaN  
 $\beta_P$ : NaN SI: NaN  
Session FR: 0.164 Hz  
Pk Ev: None  
Pk FR: --

MSN

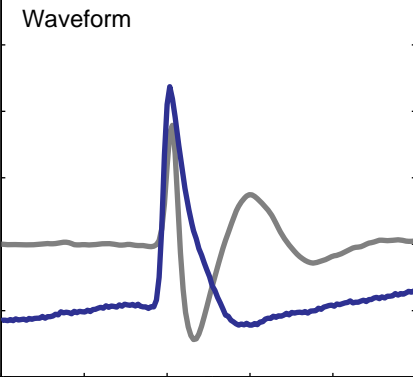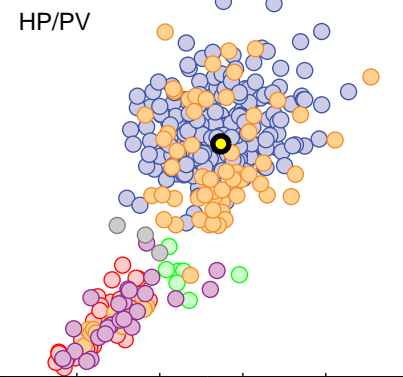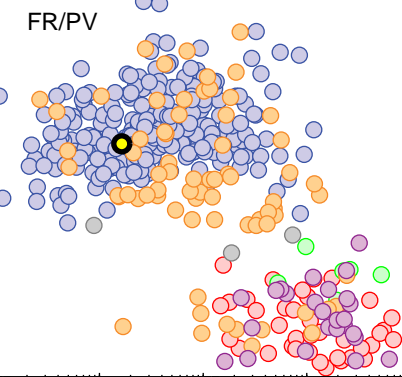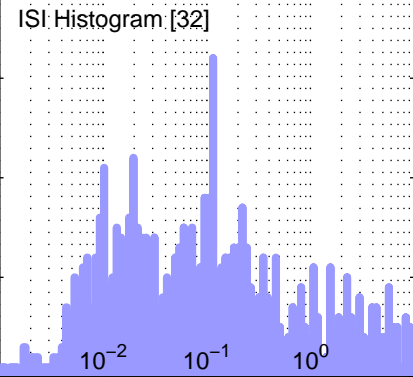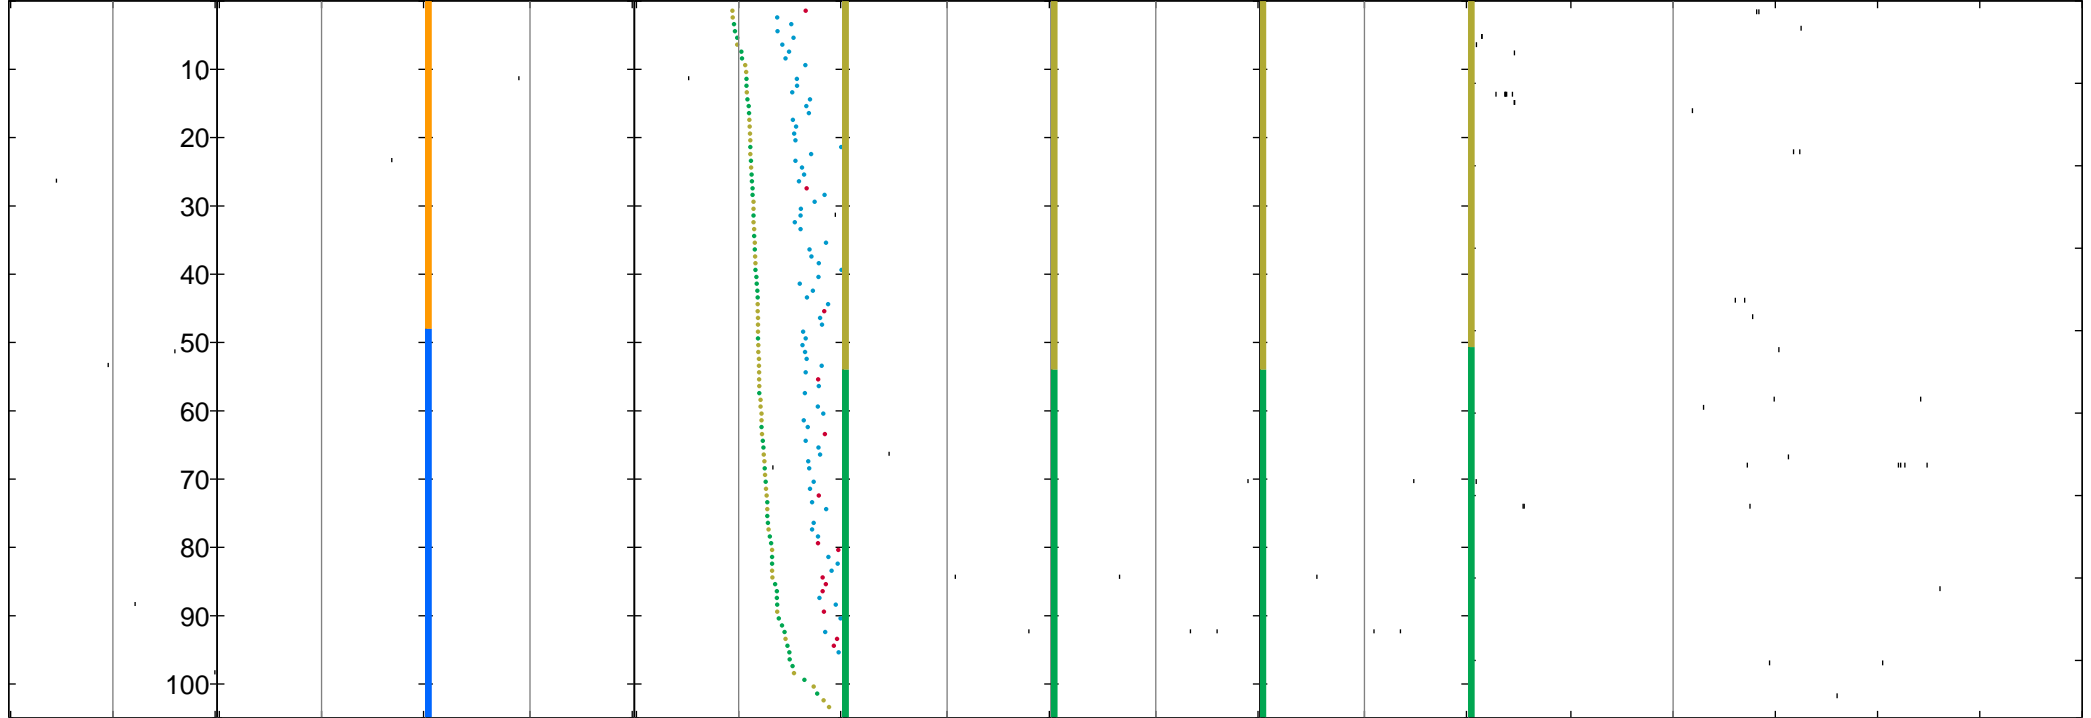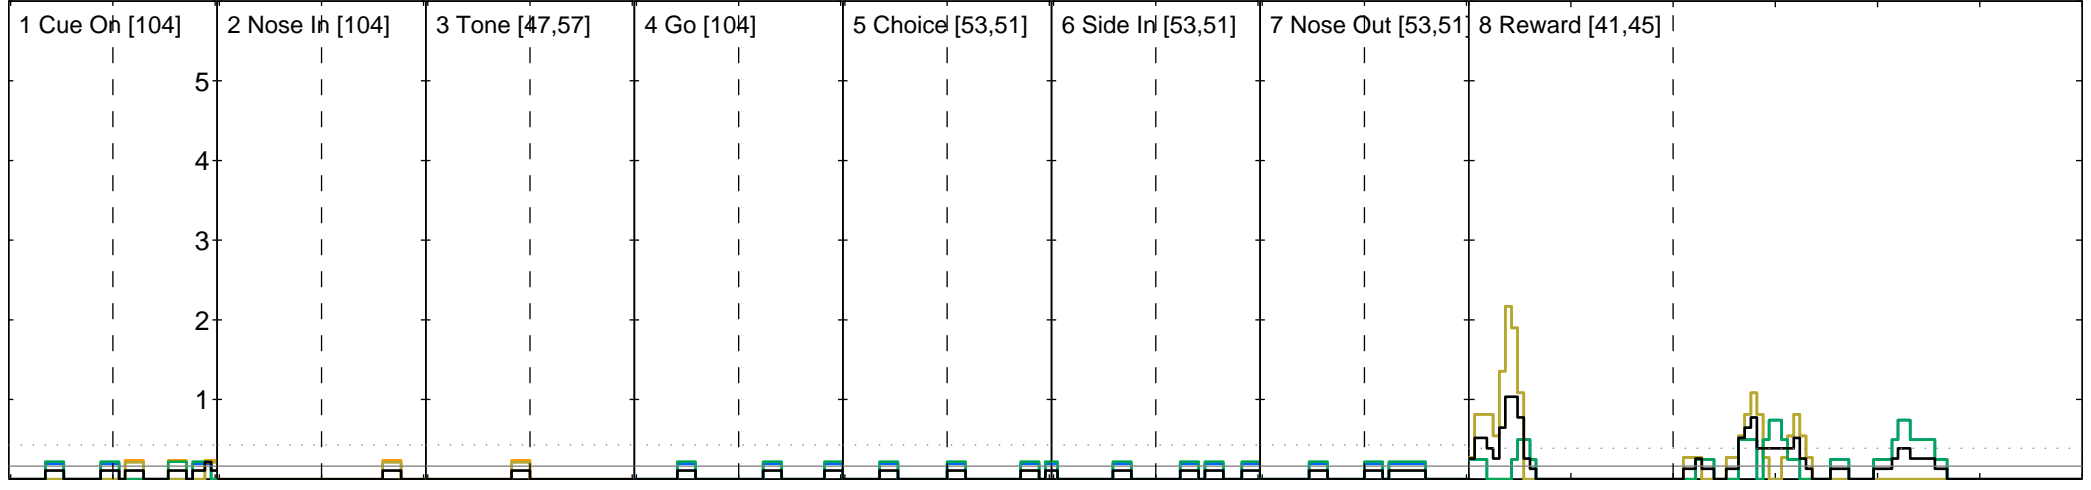

**Cell: C0320070701T09d**

AP: 1.6 ML: 3.7 DV: 6.3  
w: 2 n: 188  $P_{ISI>2}$ : 0.99  
1/2pw: 214 $\mu$ s p->v: 797 $\mu$ s  
 $\beta_T$ : NaN  $\beta_D$ : NaN  
 $\beta_P$ : NaN SI: NaN  
Session FR: 0.0372 Hz  
Pk Ev: None  
Pk FR: --

MSN

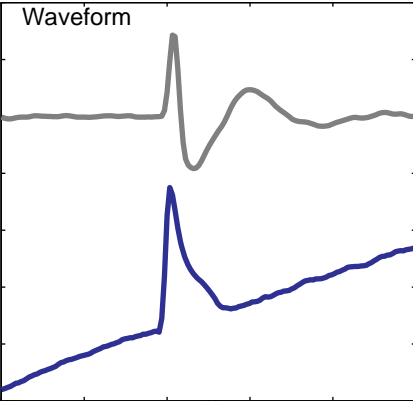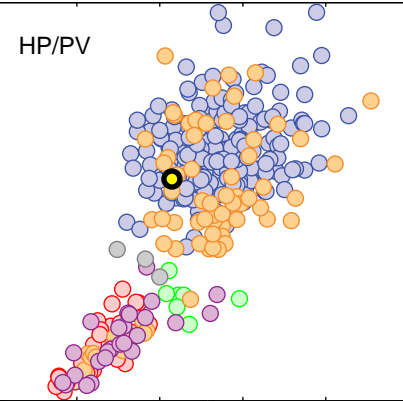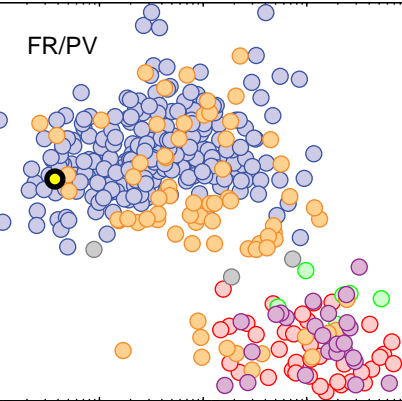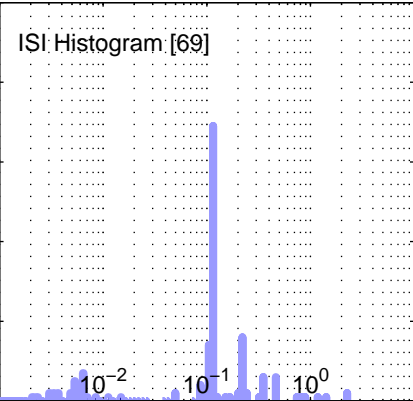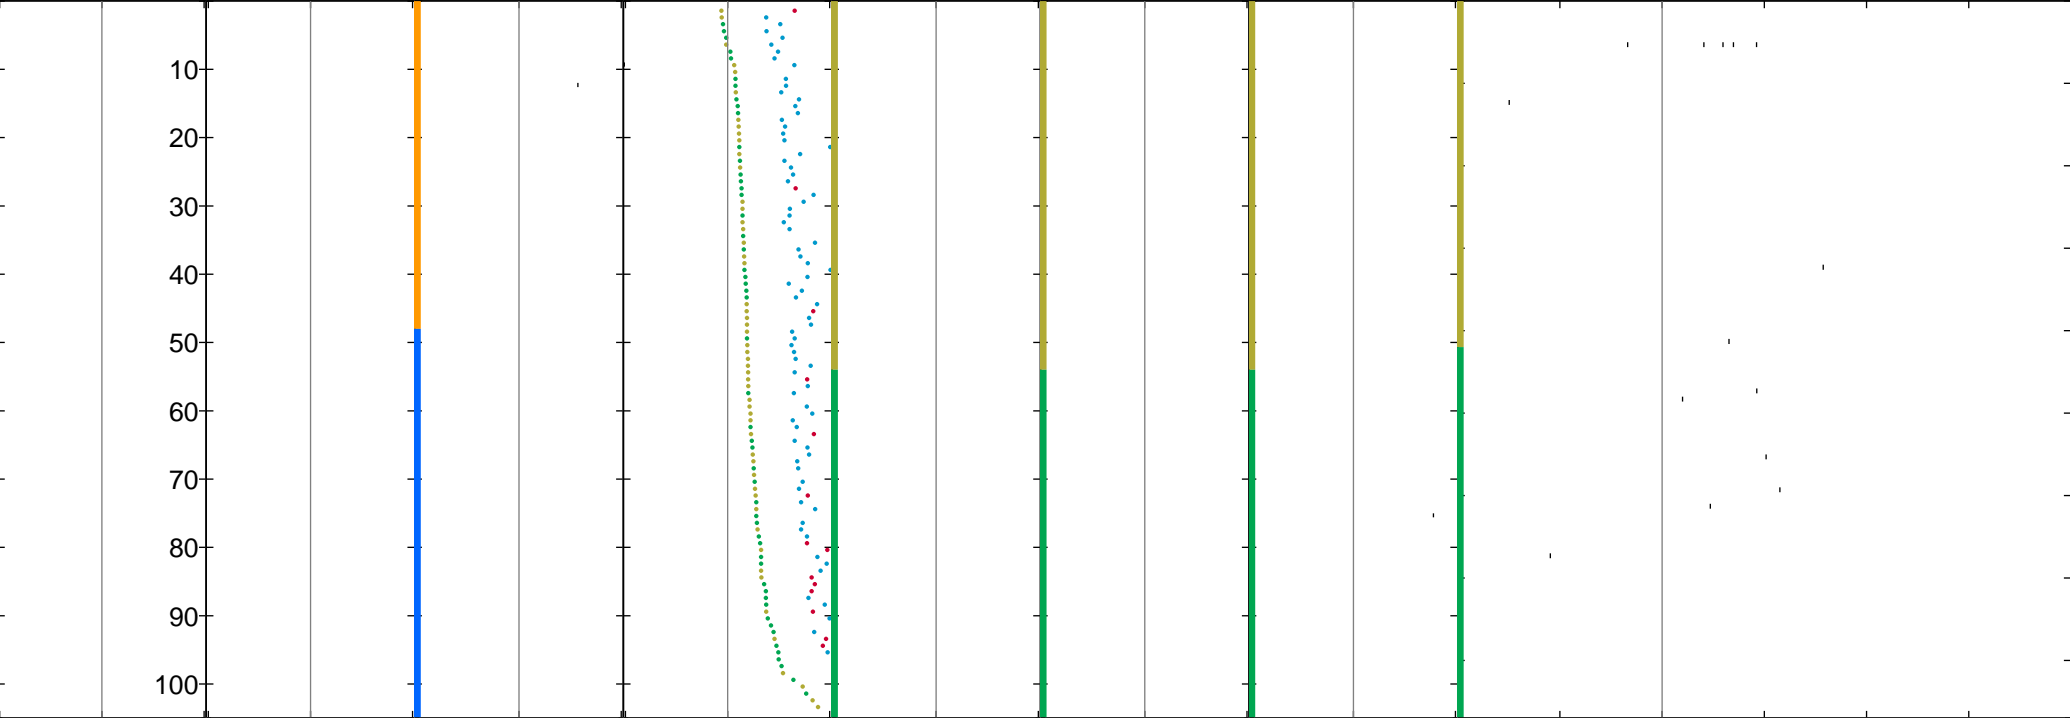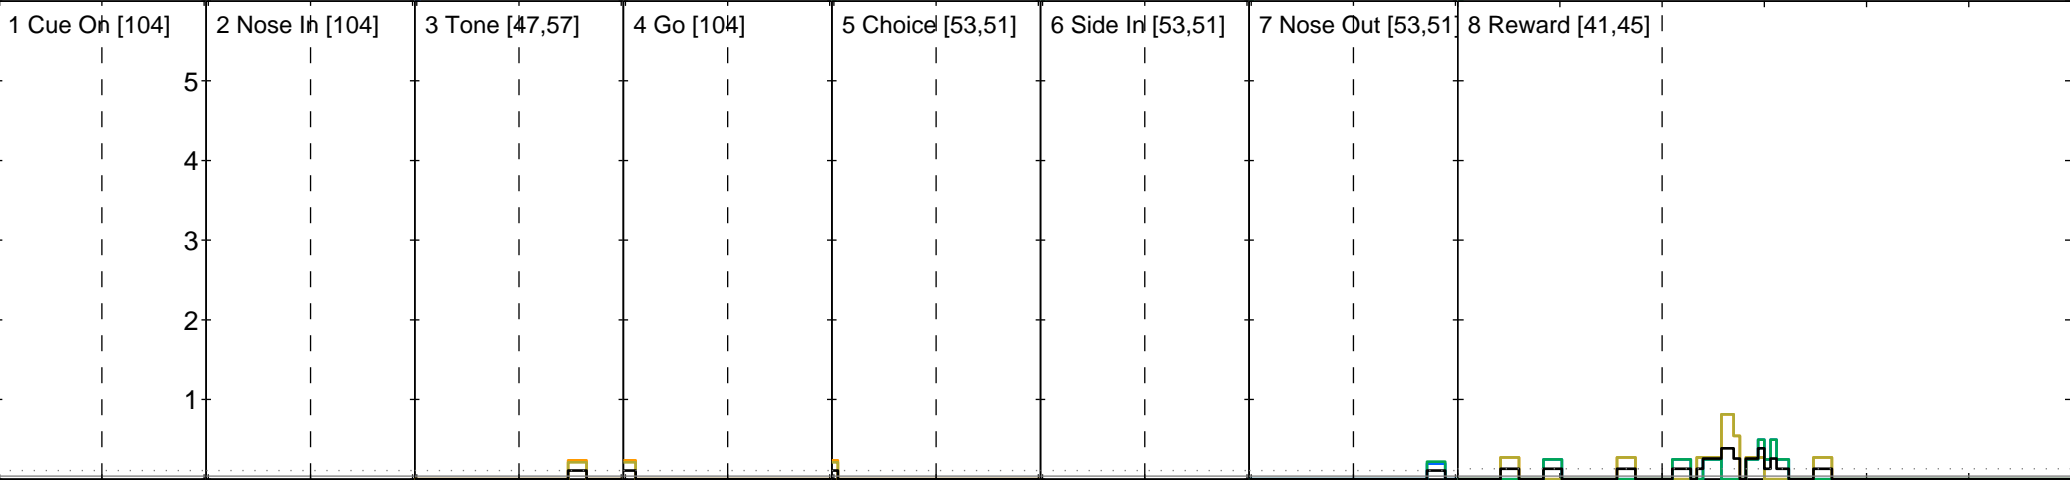

1 Cue On [104] 2 Nose In [104] 3 Tone [47,57] 4 Go [104] 5 Choice [53,51] 6 Side In [53,51] 7 Nose Out [53,51] 8 Reward [41,45]



**Cell: C0320070701T09e**

AP: 1.6 ML: 3.7 DV: 6.3  
w: 2 n: 252  $P_{ISI>2}$ : 0.99  
1/2pw: 192 $\mu$ s p->v: 995 $\mu$ s  
 $\beta_T$ : NaN  $\beta_D$ : NaN  
 $\beta_P$ : NaN SI: NaN  
Session FR: 0.047 Hz  
Pk Ev: None  
Pk FR: --

MSN

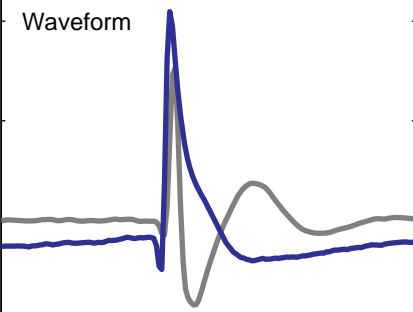

HP/PV

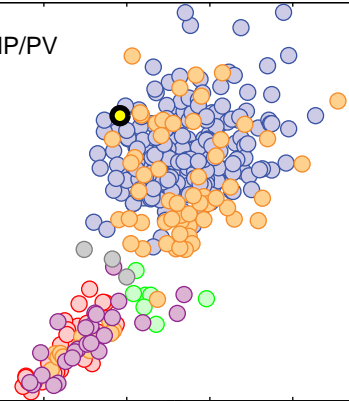

FR/PV

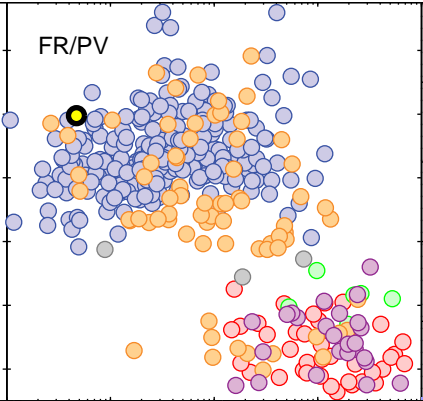

ISI Histogram [10]

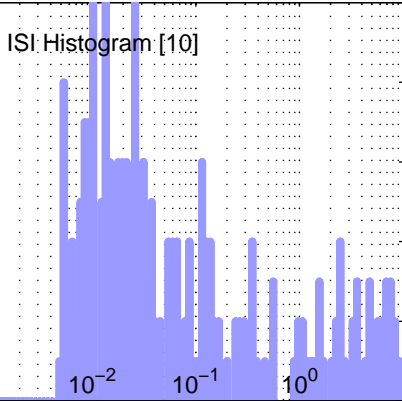

10  
20  
30  
40  
50  
60  
70  
80  
90  
100

1 Cue On [104] 2 Nose In [104] 3 Tone [47,57] 4 Go [104] 5 Choice [53,51] 6 Side In [53,51] 7 Nose Out [53,51] 8 Reward [41,45]

5  
4  
3  
2  
1

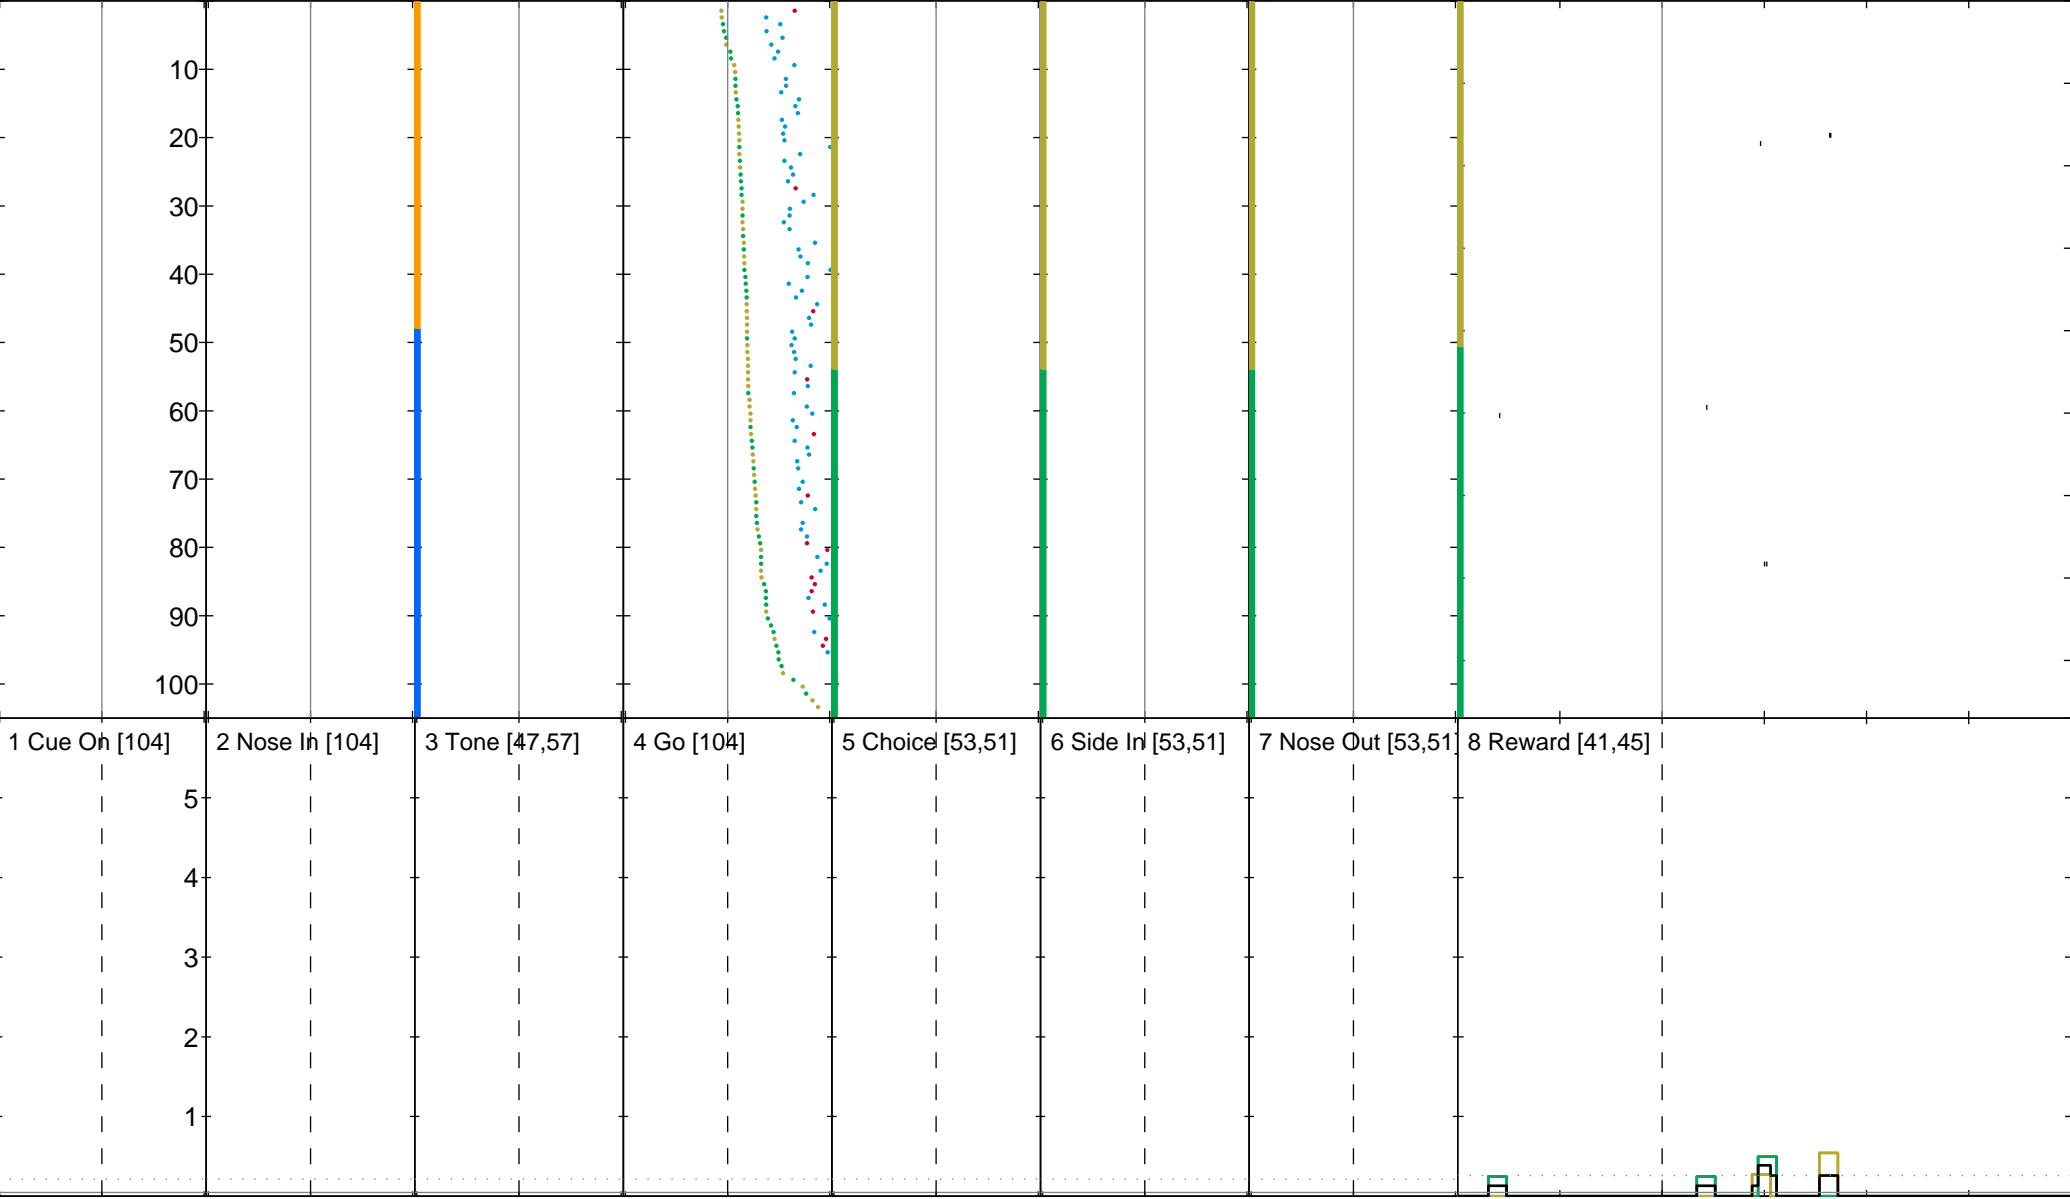

**Cell: C0320070701T11a**

AP: -0.96 ML: 3.7 DV: 7.3  
w: 2 n: 2200  $P_{ISI>2}$ : 0.88  
1/2pw: 202 $\mu$ s p->v: 925 $\mu$ s  
 $\beta_T$ : NaN  $\beta_D$ : NaN  
 $\beta_P$ : NaN SI: NaN  
Session FR: 0.394 Hz  
Pk Ev: None  
Pk FR: --

**MSN**

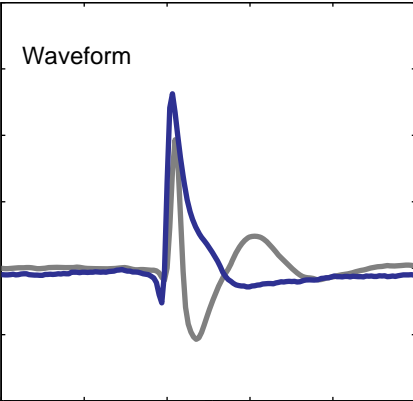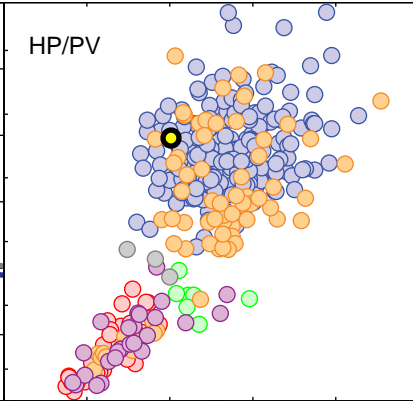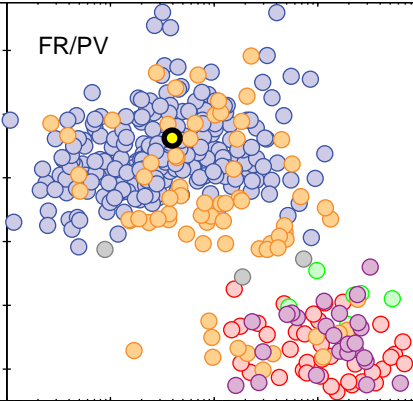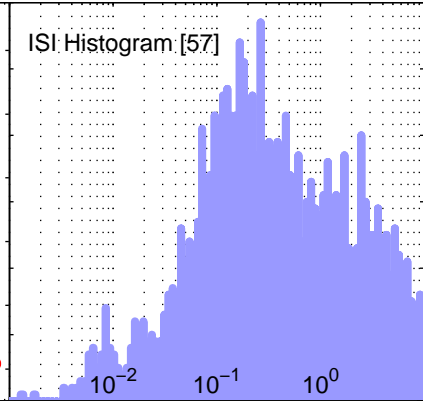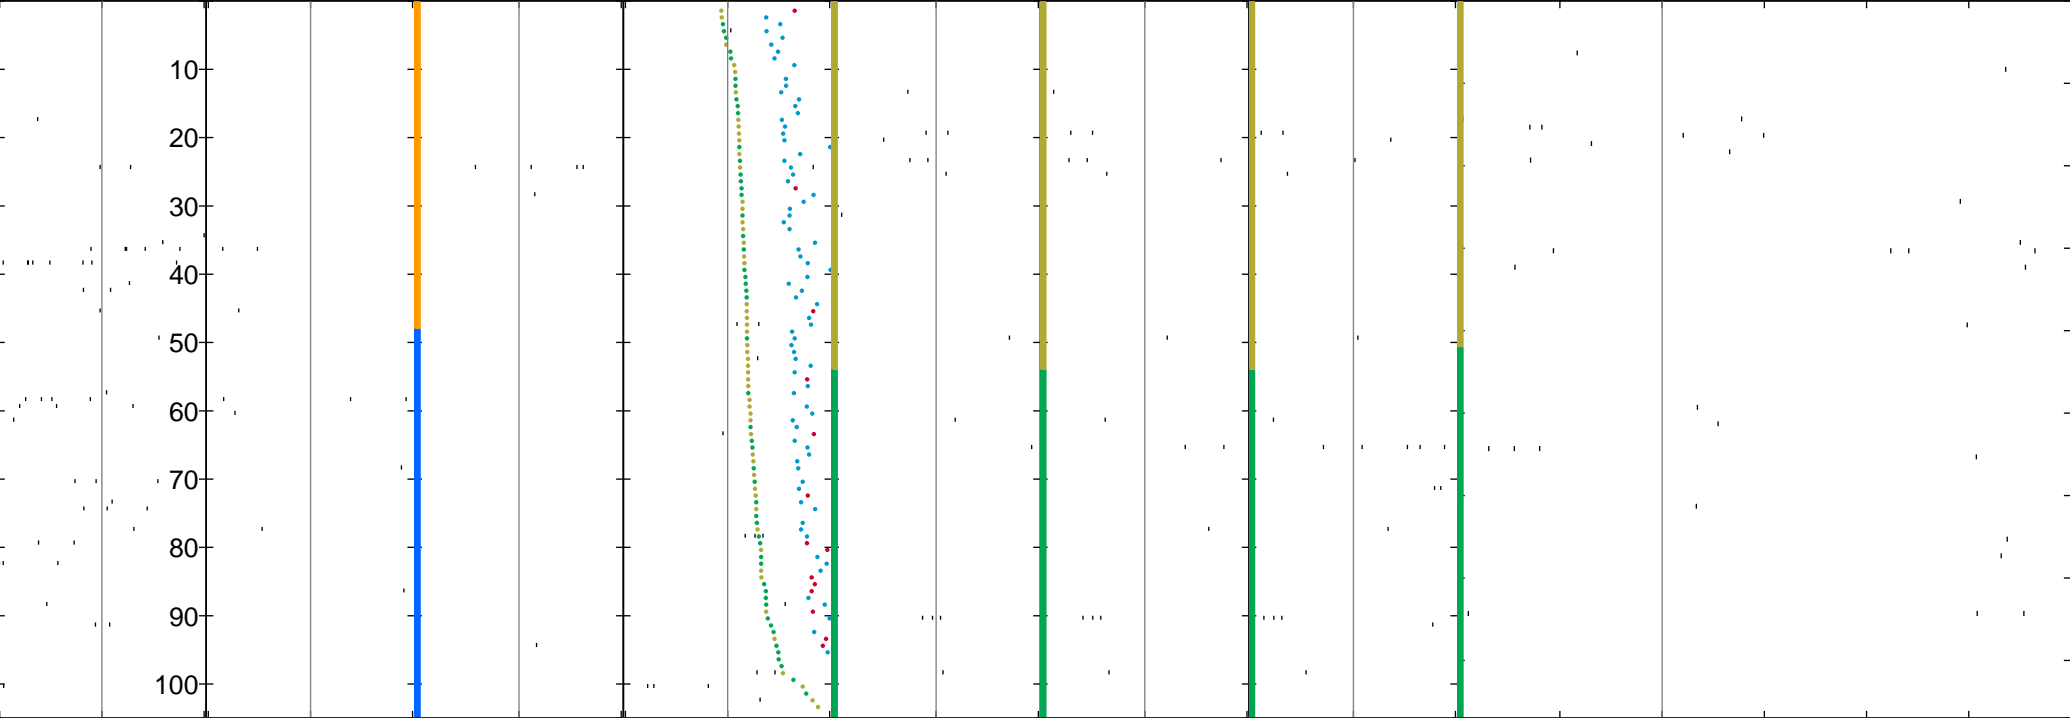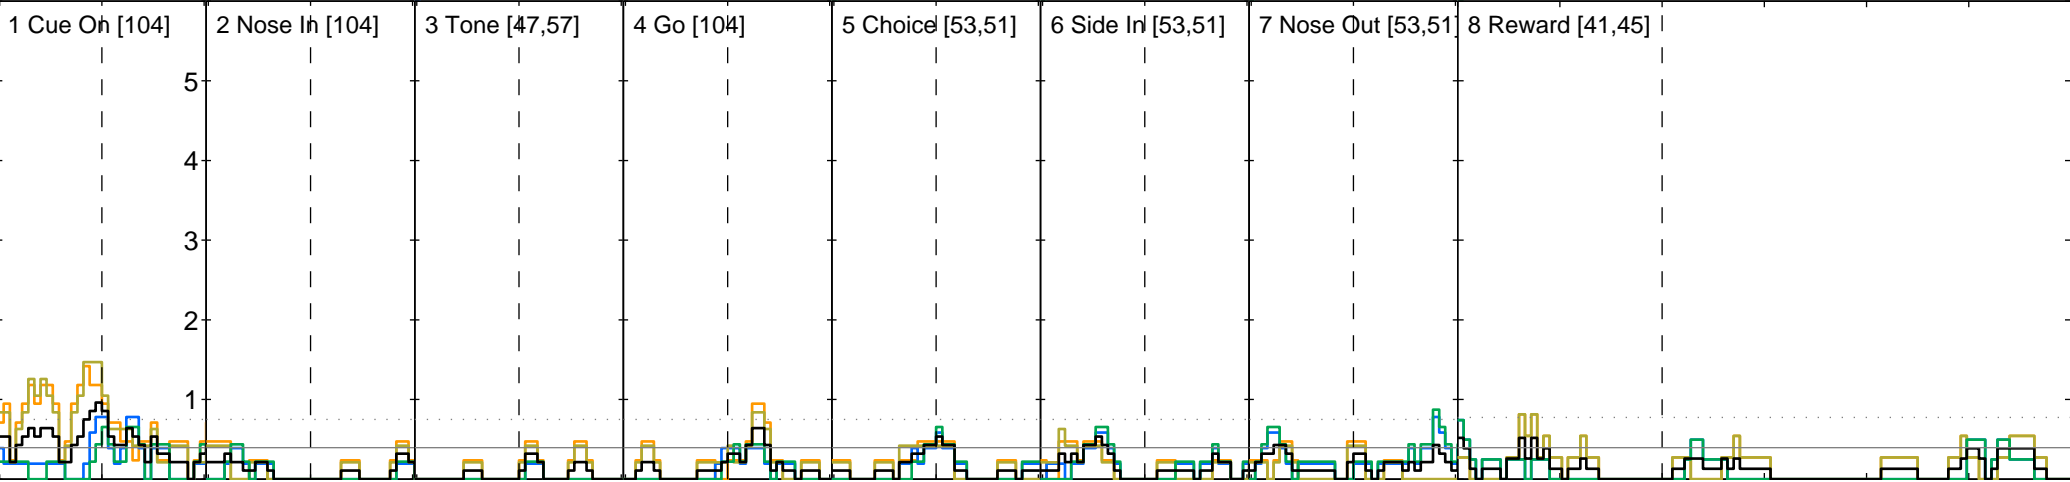

**Cell: C0320070701T11b**

AP: -0.96 ML: 3.7 DV: 7.3  
w: 4 n: 171  $P_{ISI>2}$ : 0.99  
1/2pw: 208 $\mu$ s p->v: 835 $\mu$ s  
 $\beta_T$ : NaN  $\beta_D$ : NaN  
 $\beta_P$ : NaN SI: NaN  
Session FR: 0.0407 Hz  
Pk Ev: None  
Pk FR: --

MSN

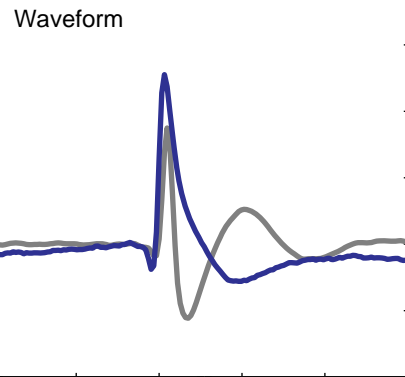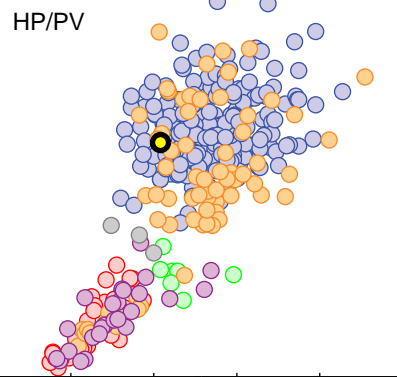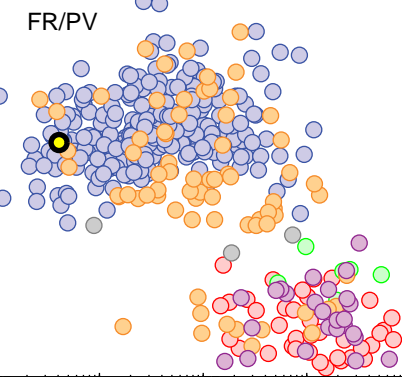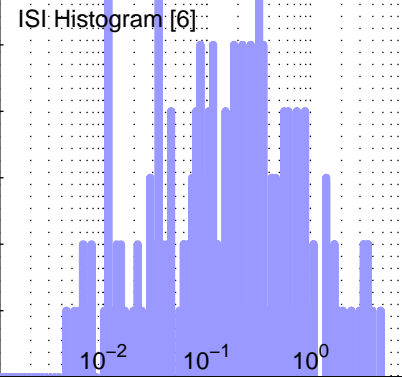

10  
20  
30  
40  
50  
60  
70  
80  
90  
100

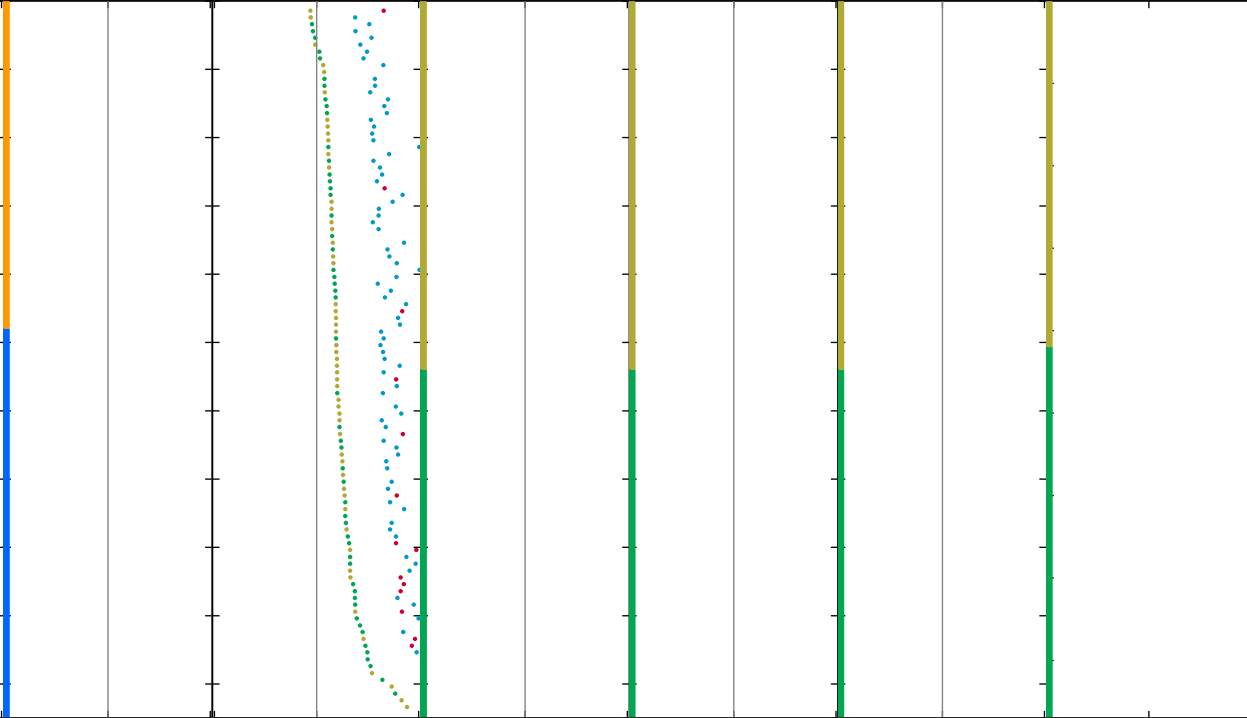

1 Cue On [104] 2 Nose In [104] 3 Tone [47,57] 4 Go [104] 5 Choice [53,51] 6 Side In [53,51] 7 Nose Out [53,51] 8 Reward [41,45]

5  
4  
3  
2  
1

**Cell: C0320070702T07b**

AP: 0.96 ML: 3.6 DV: 7.8

w: 3 n: 646  $P_{ISI>2}$ : 0.971/2pw: 240 $\mu$ s p->v: 838 $\mu$ s $\beta_T$ : NaN  $\beta_D$ : NaN $\beta_P$ : NaN SI: NaN

Session FR: 0.129 Hz

Pk Ev: None

Pk FR: --

MSN

Waveform

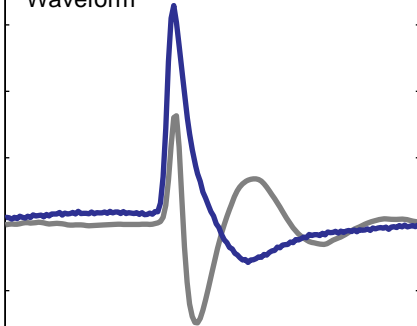

HP/PV

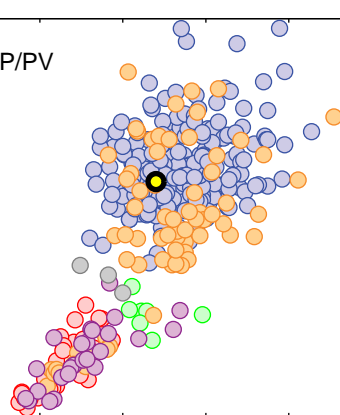

FR/PV

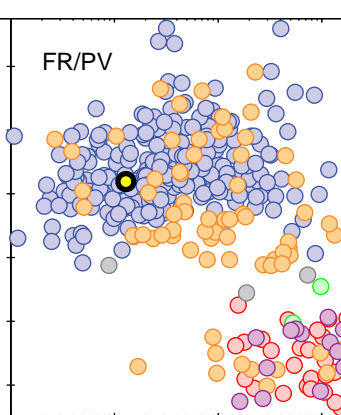

ISI Histogram [15]

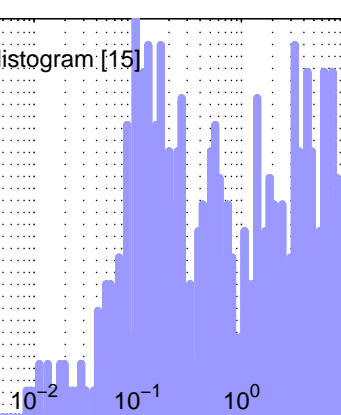

20

40

60

80

100

120

1 Cue On [135]

2 Nose In [135]

3 Tone [71,64]

4 Go [135]

5 Choice [73,62]

6 Side In [73,62]

7 Nose Out [73,62]

8 Reward [60,51]

5

4

3

2

1

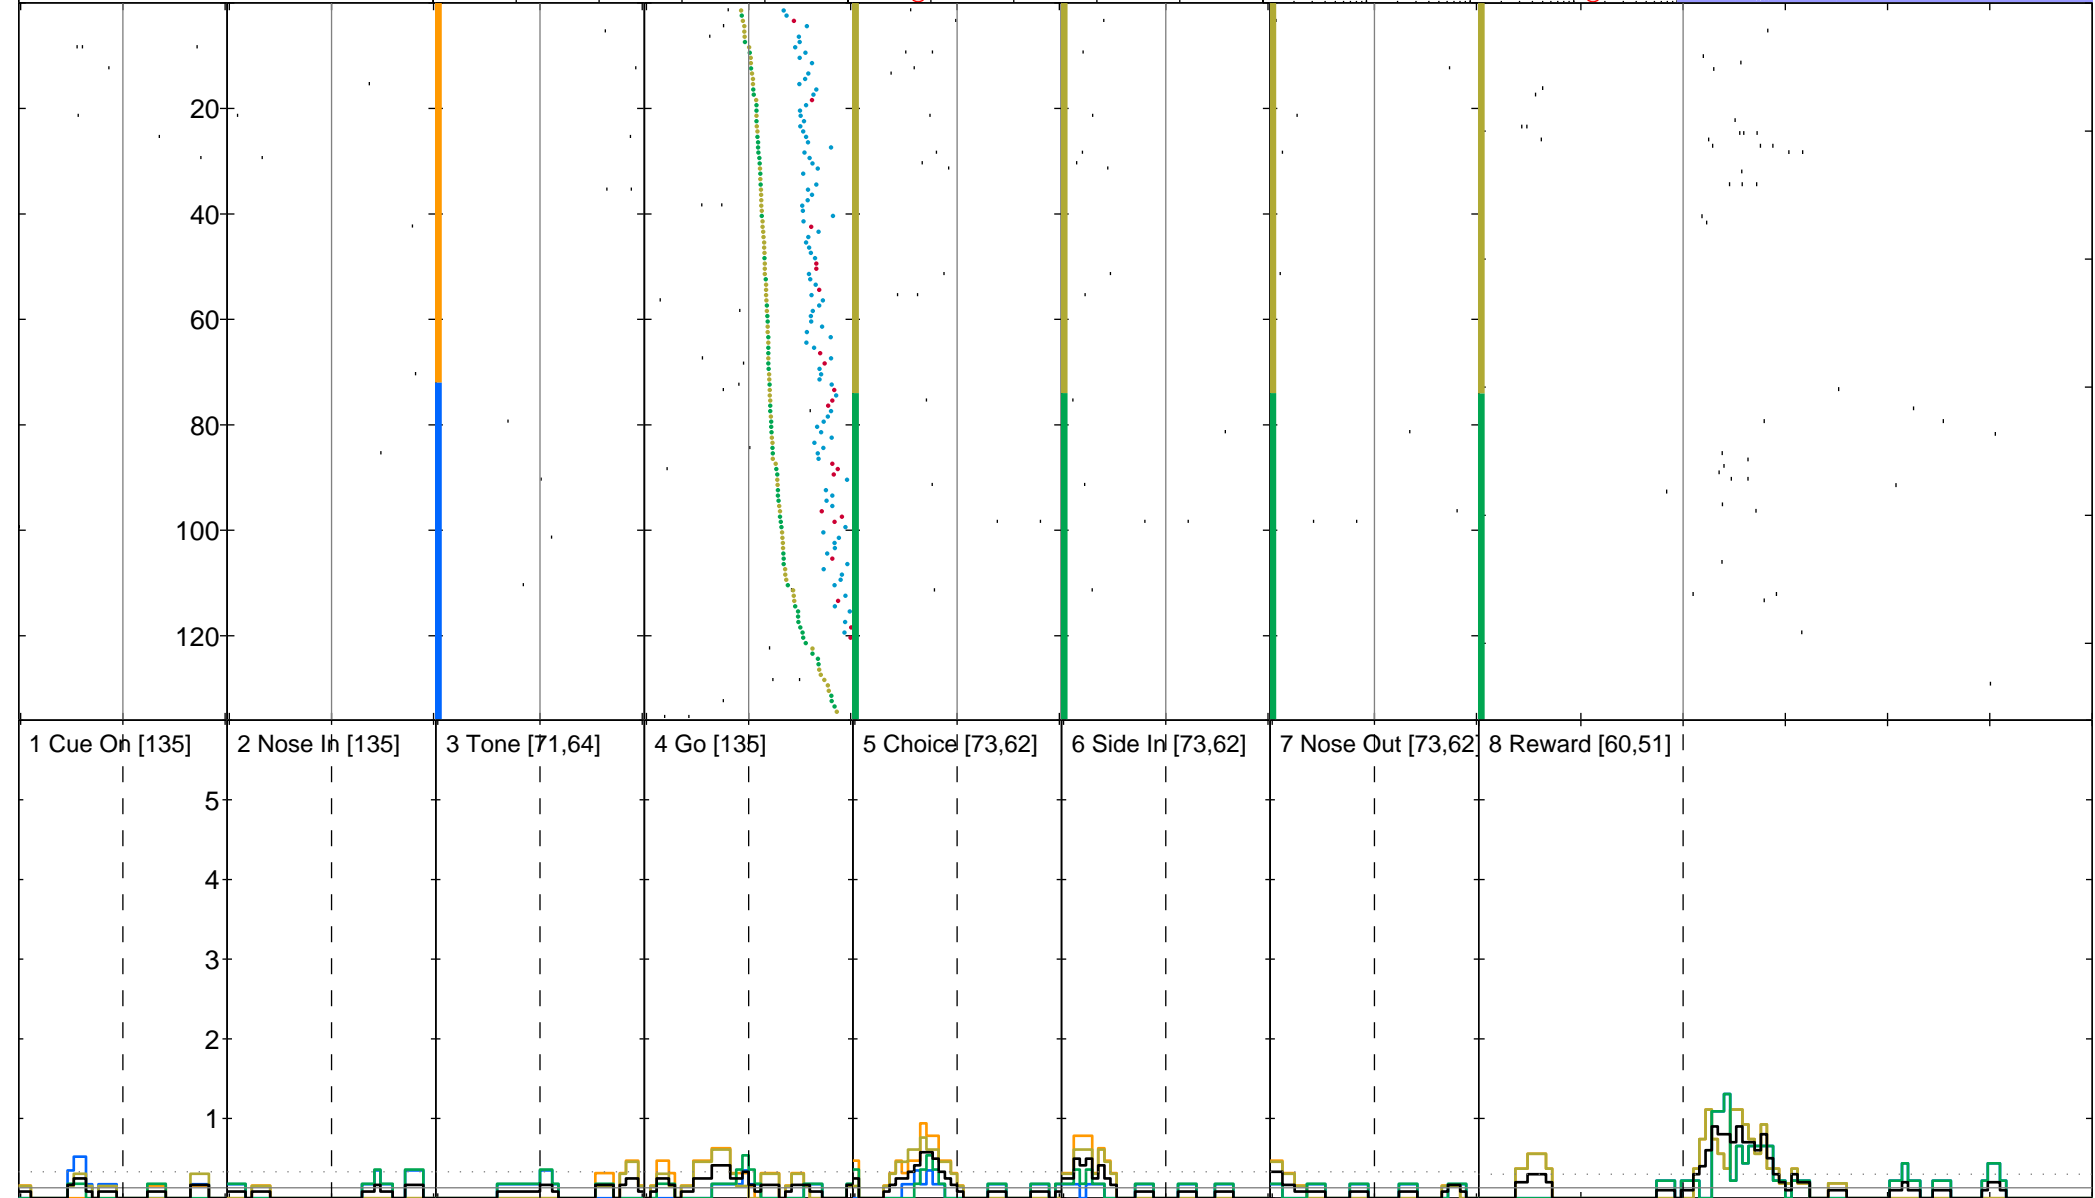

**Cell: C0320070702T09a**

AP: 1.6 ML: 3.7 DV: 6.4  
w: 3 n: 1507  $P_{ISI>2}$ : 0.88  
1/2pw: 310 $\mu$ s p->v: 832 $\mu$ s  
 $\beta_T$ : NaN  $\beta_D$ : NaN  
 $\beta_P$ : NaN SI: NaN  
Session FR: 0.302 Hz  
Pk Ev: None  
Pk FR: --

MSN

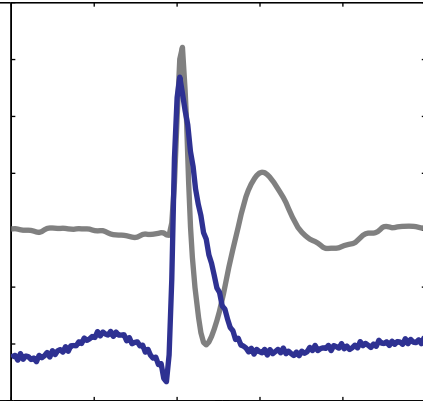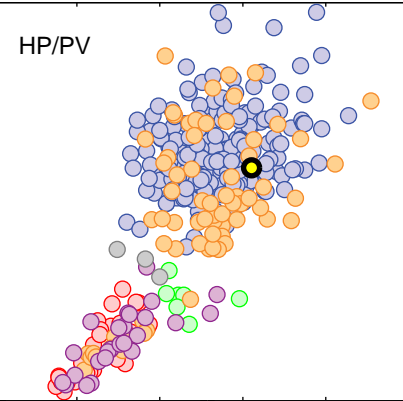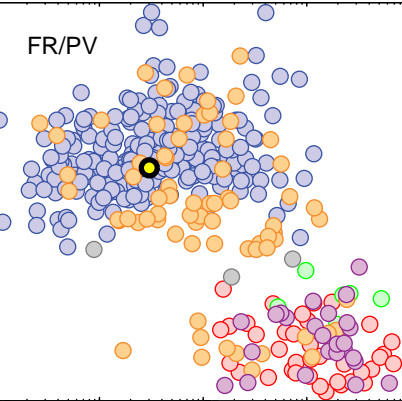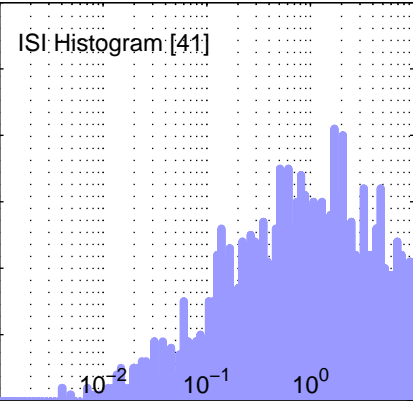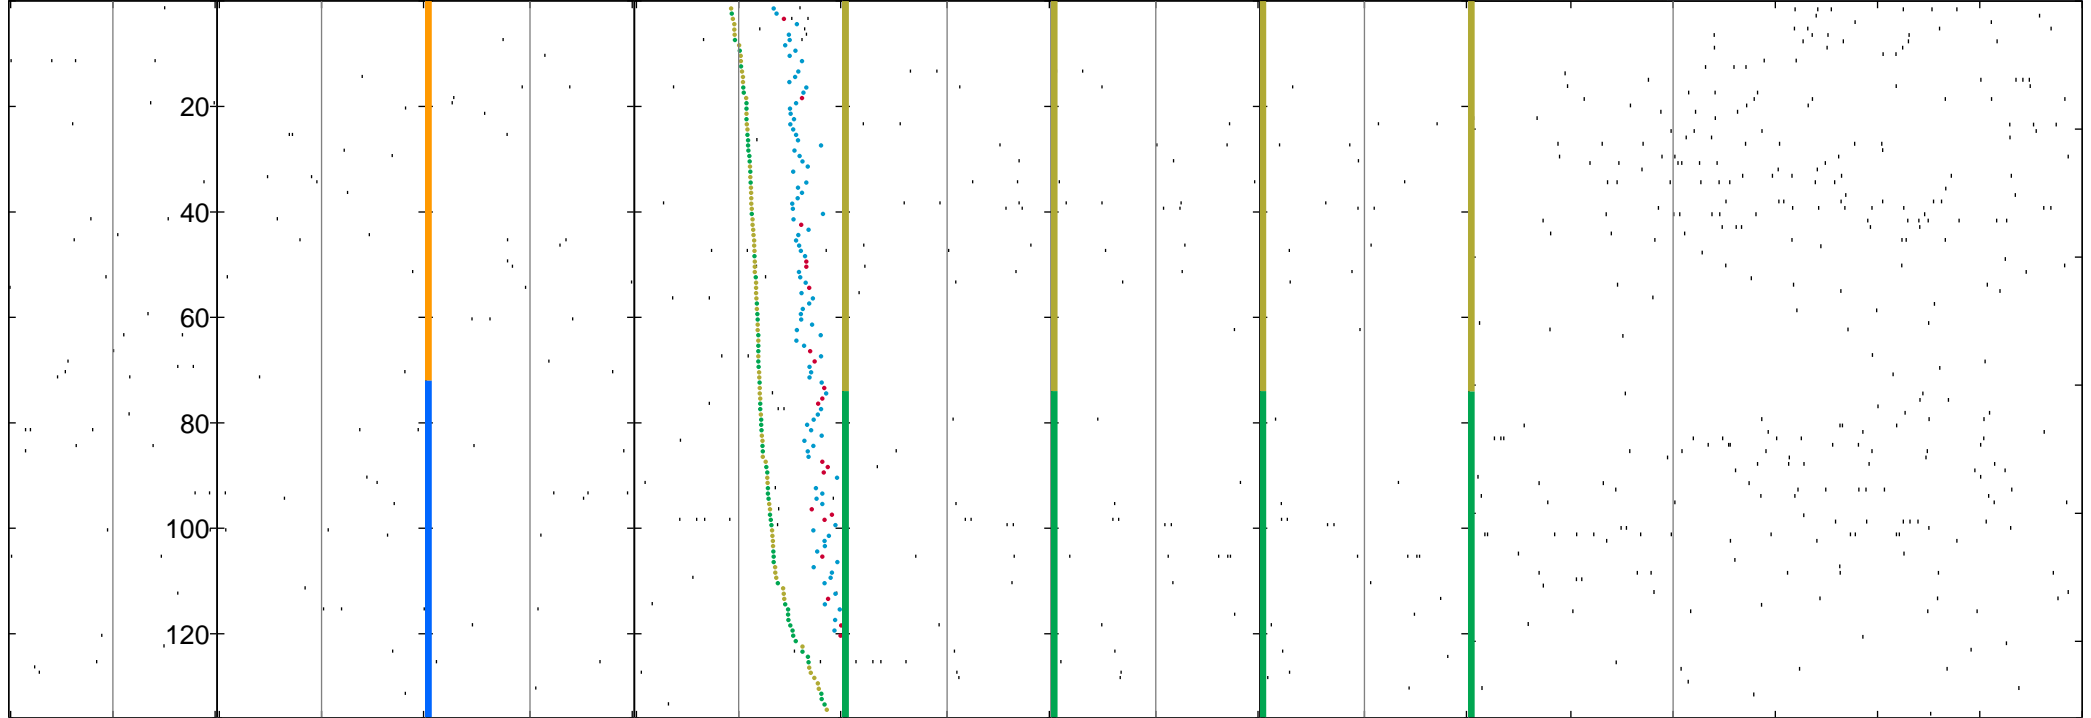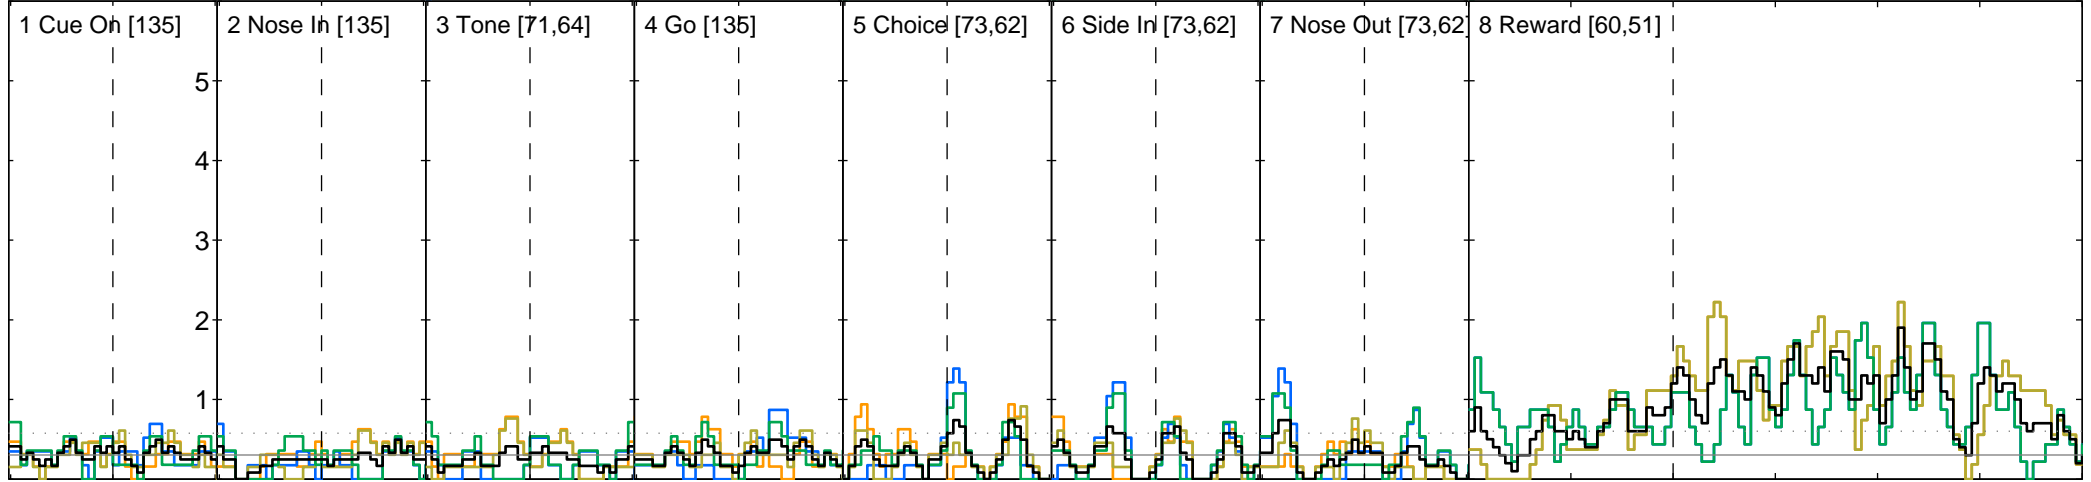

**Cell: C0320070702T09b**

AP: 1.6 ML: 3.7 DV: 6.4  
w: 3 n: 907  $P_{ISI>2}$ : 0.94  
1/2pw: 296 $\mu$ s p->v: 822 $\mu$ s  
 $\beta_T$ : NaN  $\beta_D$ : NaN  
 $\beta_P$ : NaN SI: NaN  
Session FR: 0.182 Hz  
Pk Ev: None  
Pk FR: --

MSN

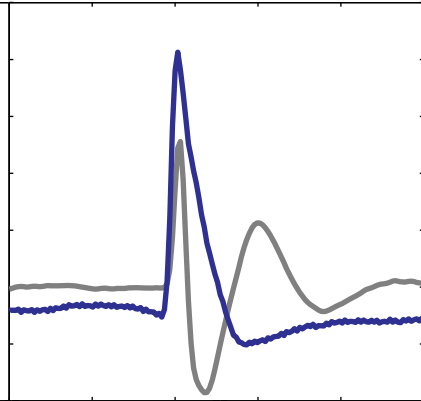

HP/PV

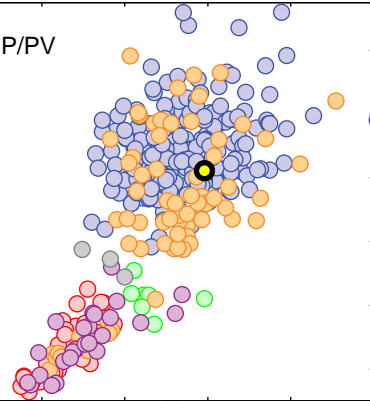

FR/PV

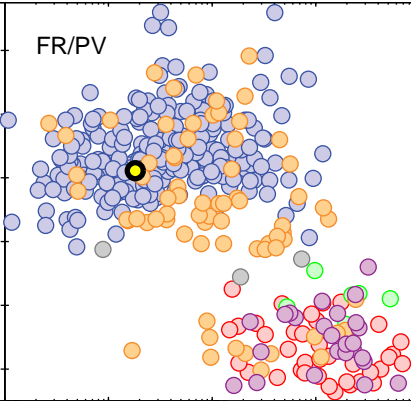

ISI Histogram [21]

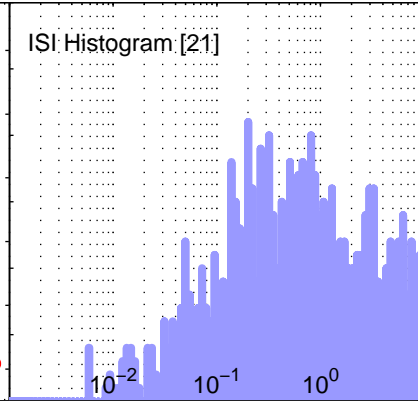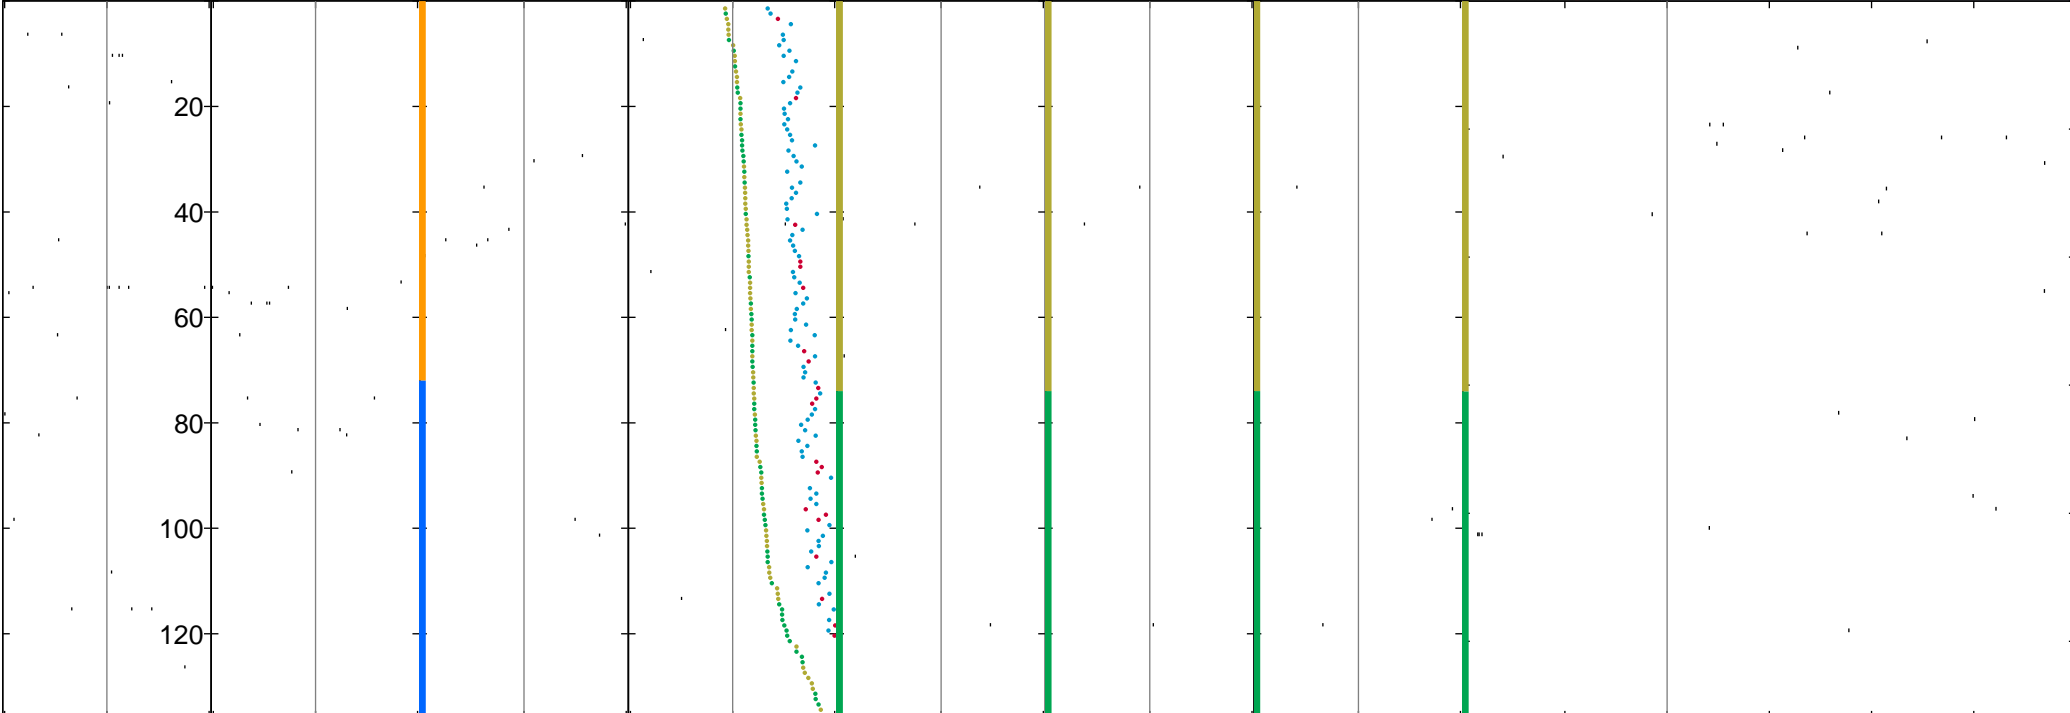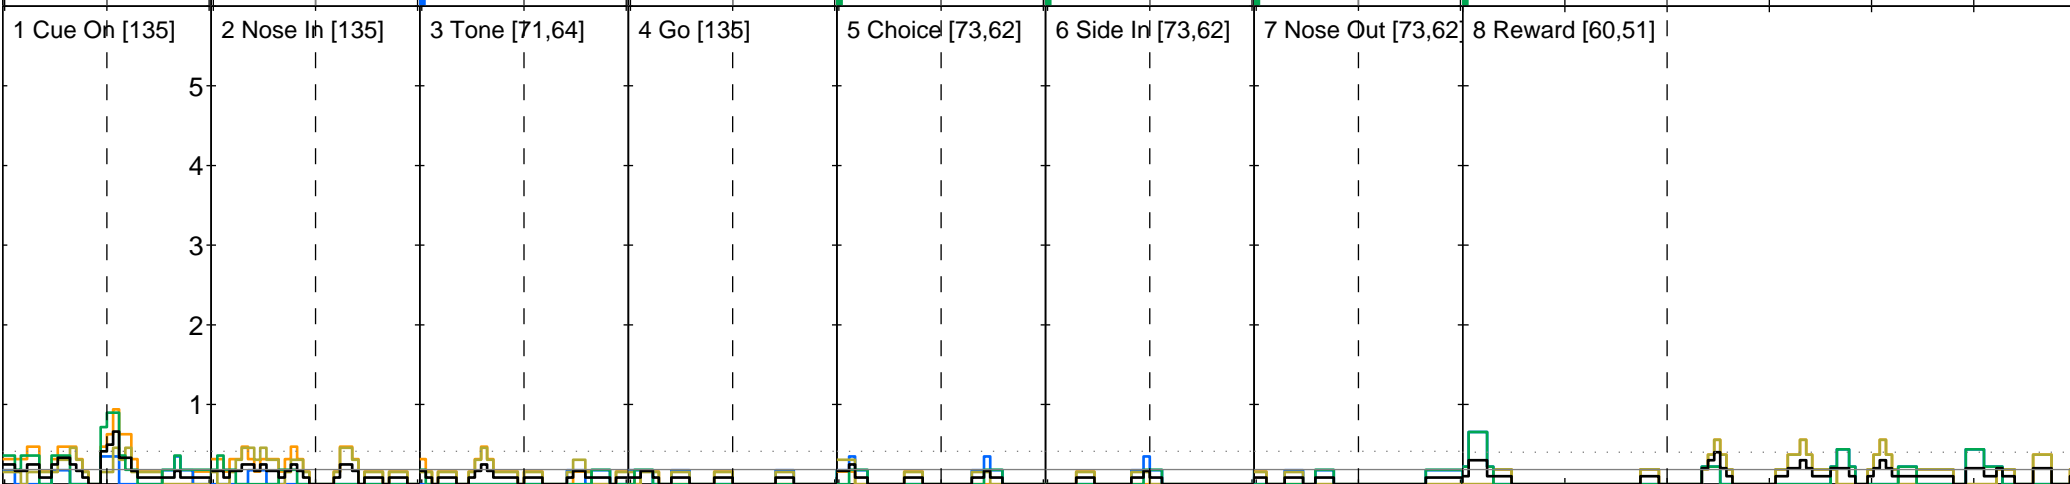

**Cell: C0420070226T04c**

AP: 2.5 ML: 1.8 DV: 5.7  
w: 1 n: 1156  $P_{ISI>2}$ : 0.94  
1/2pw: 275 $\mu$ s p->v: 1050 $\mu$ s  
 $\beta_T$ : NaN  $\beta_D$ : NaN  
 $\beta_P$ : NaN SI: NaN  
Session FR: 0.185 Hz  
Pk Ev: None  
Pk FR: --

MSN

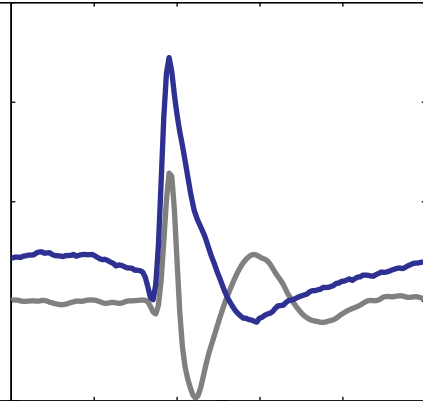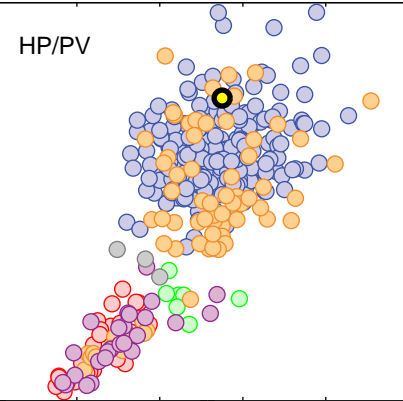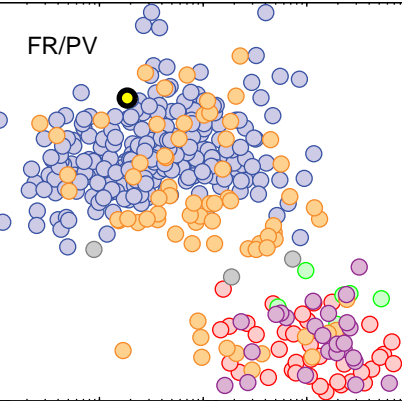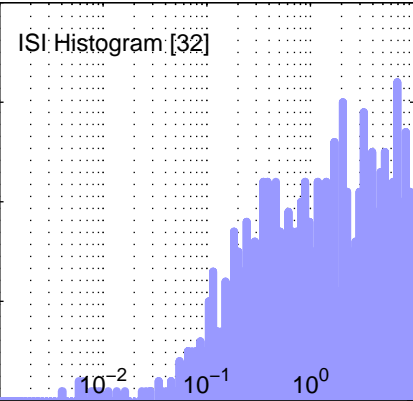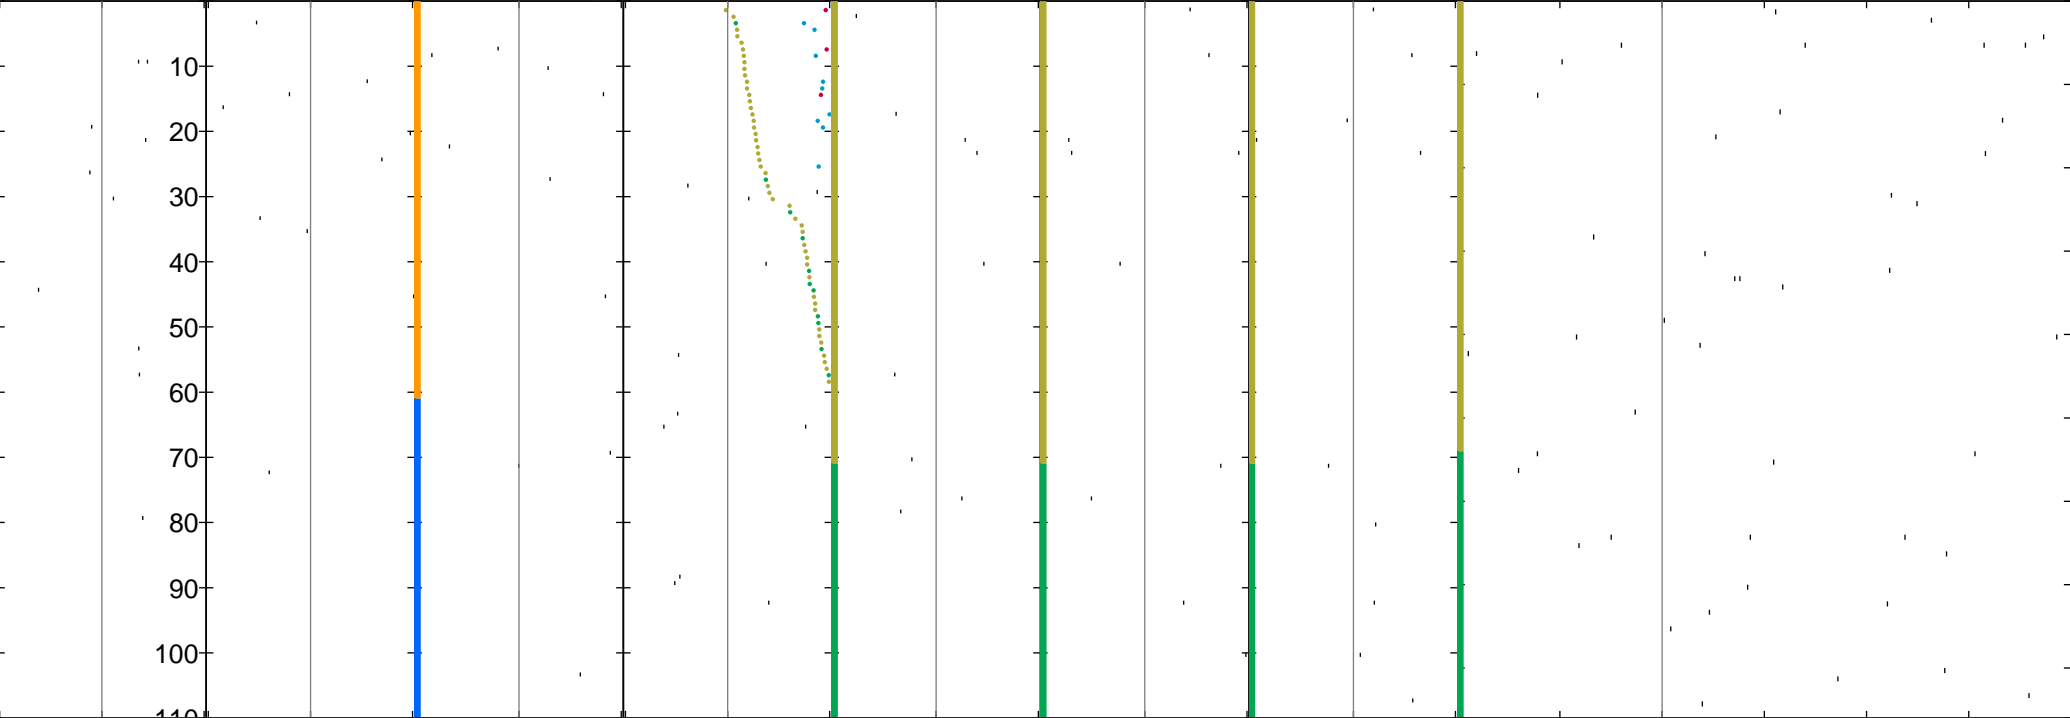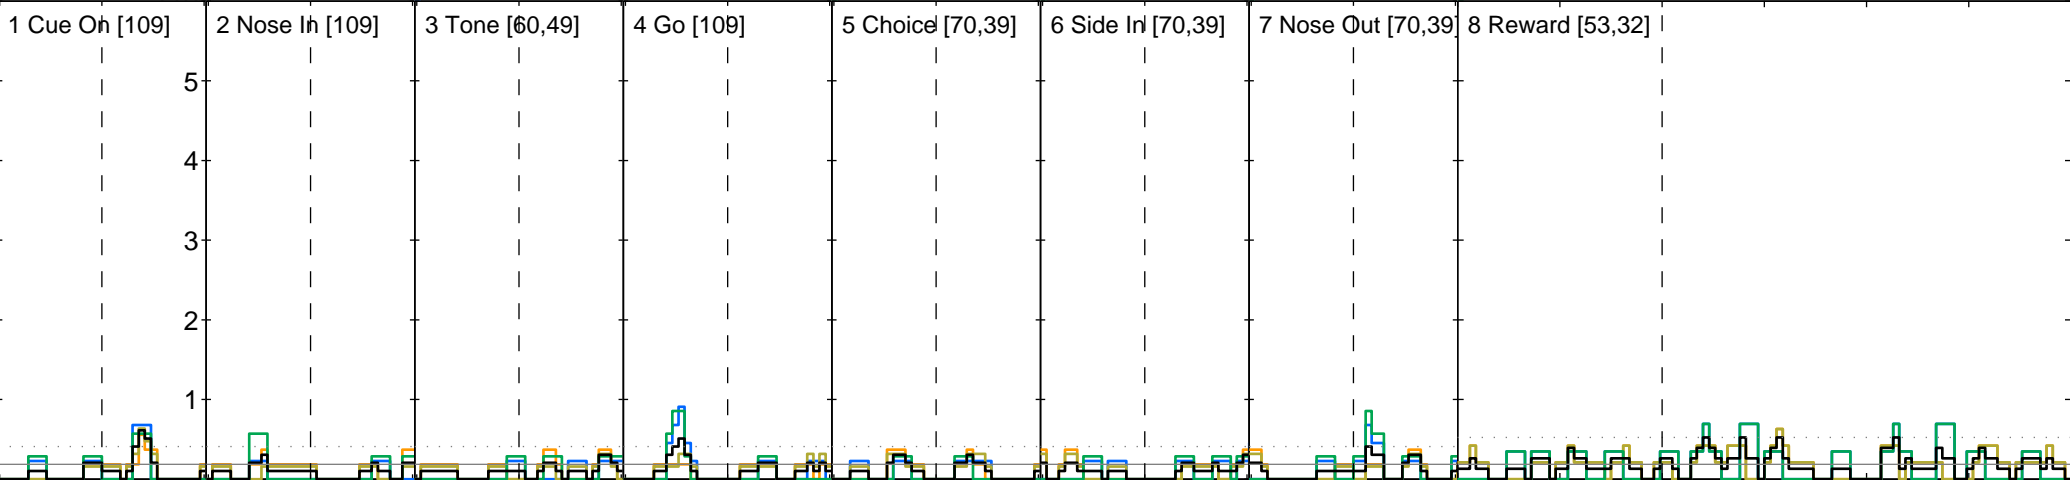

Cell: C0420070226T04e

AP: 2.5 ML: 1.8 DV: 5.7

w: 3 n: 1941  $P_{ISI>2}$ : 0.87

1/2pw: 330 $\mu$ s p $\rightarrow$ v: 1122 $\mu$ s

$\beta_T$ : -2.8  $\beta_D$ : 0.8

$\beta_P$ : 2.5 SI: NaN

Session FR: 0.312 Hz

Pk Ev: None

Pk FR: --

MSN

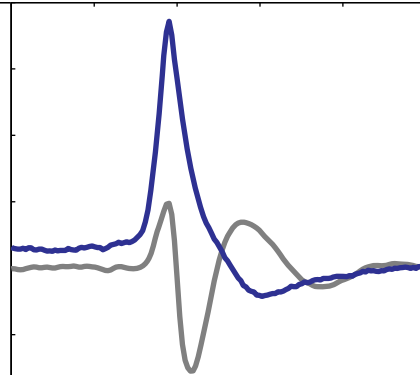

HP/PV

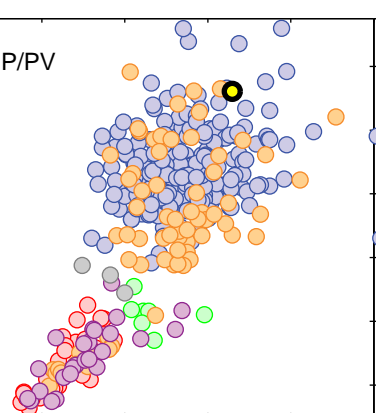

FR/PV

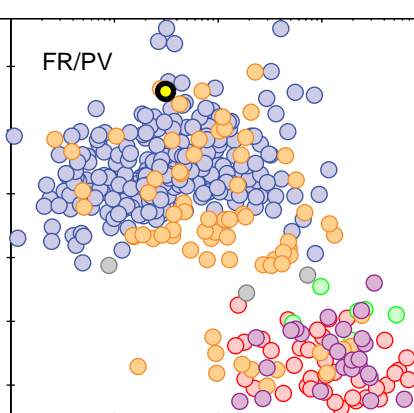

ISI Histogram [50]

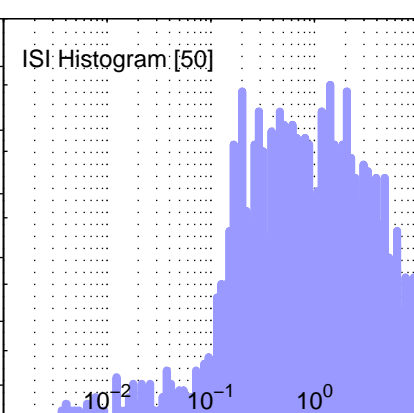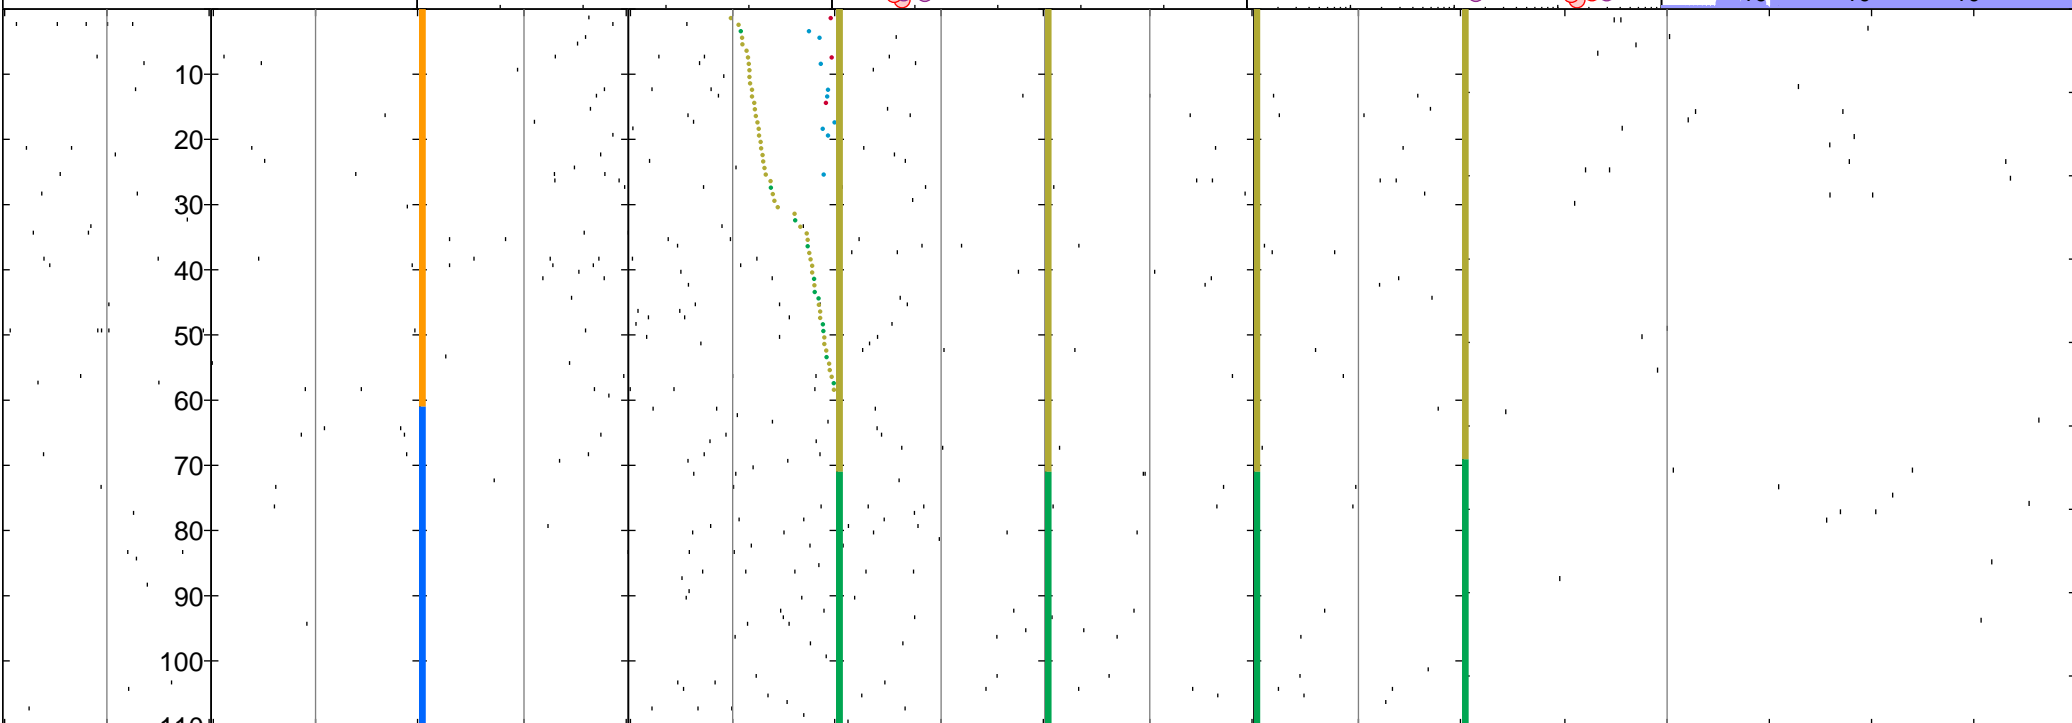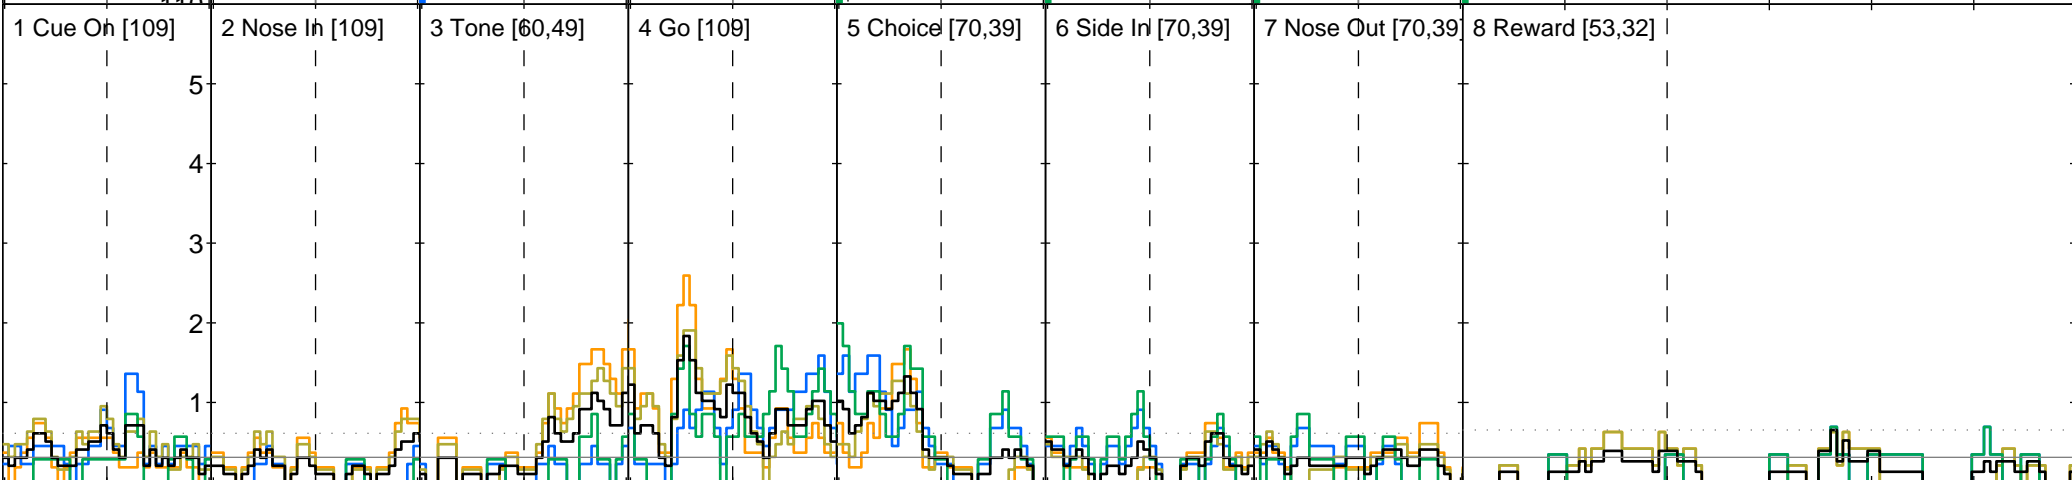



**Cell: C0420070226T05a**

AP: 2.5 ML: 1.3 DV: 6.3  
w: 3 n: 2054  $P_{ISI>2}$ : 0.9  
1/2pw: 230 $\mu$ s p->v: 864 $\mu$ s  
 $\beta_T$ : NaN  $\beta_D$ : NaN  
 $\beta_P$ : NaN SI: NaN  
Session FR: 0.329 Hz  
Pk Ev: None  
Pk FR: --

MSN

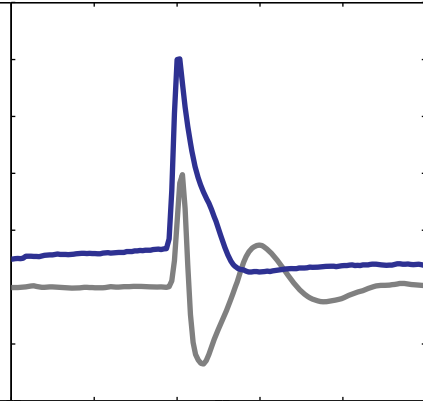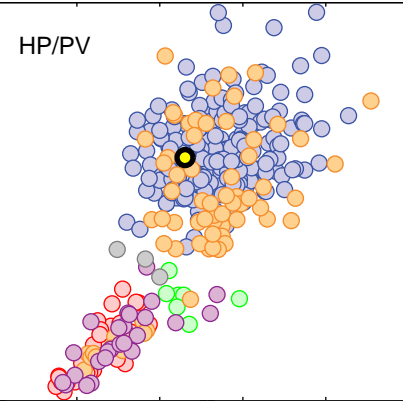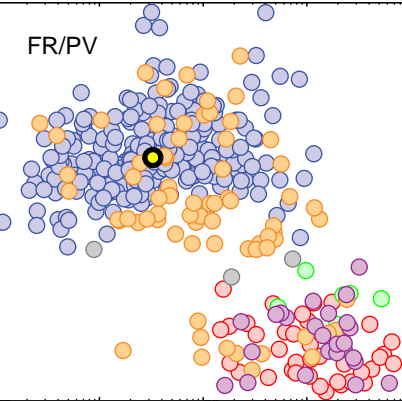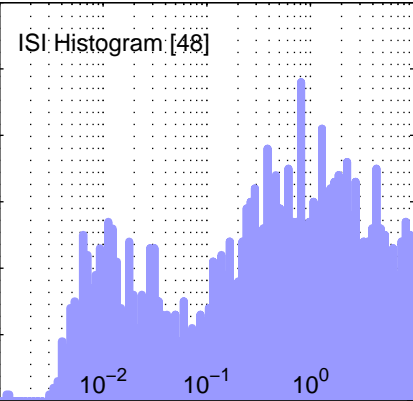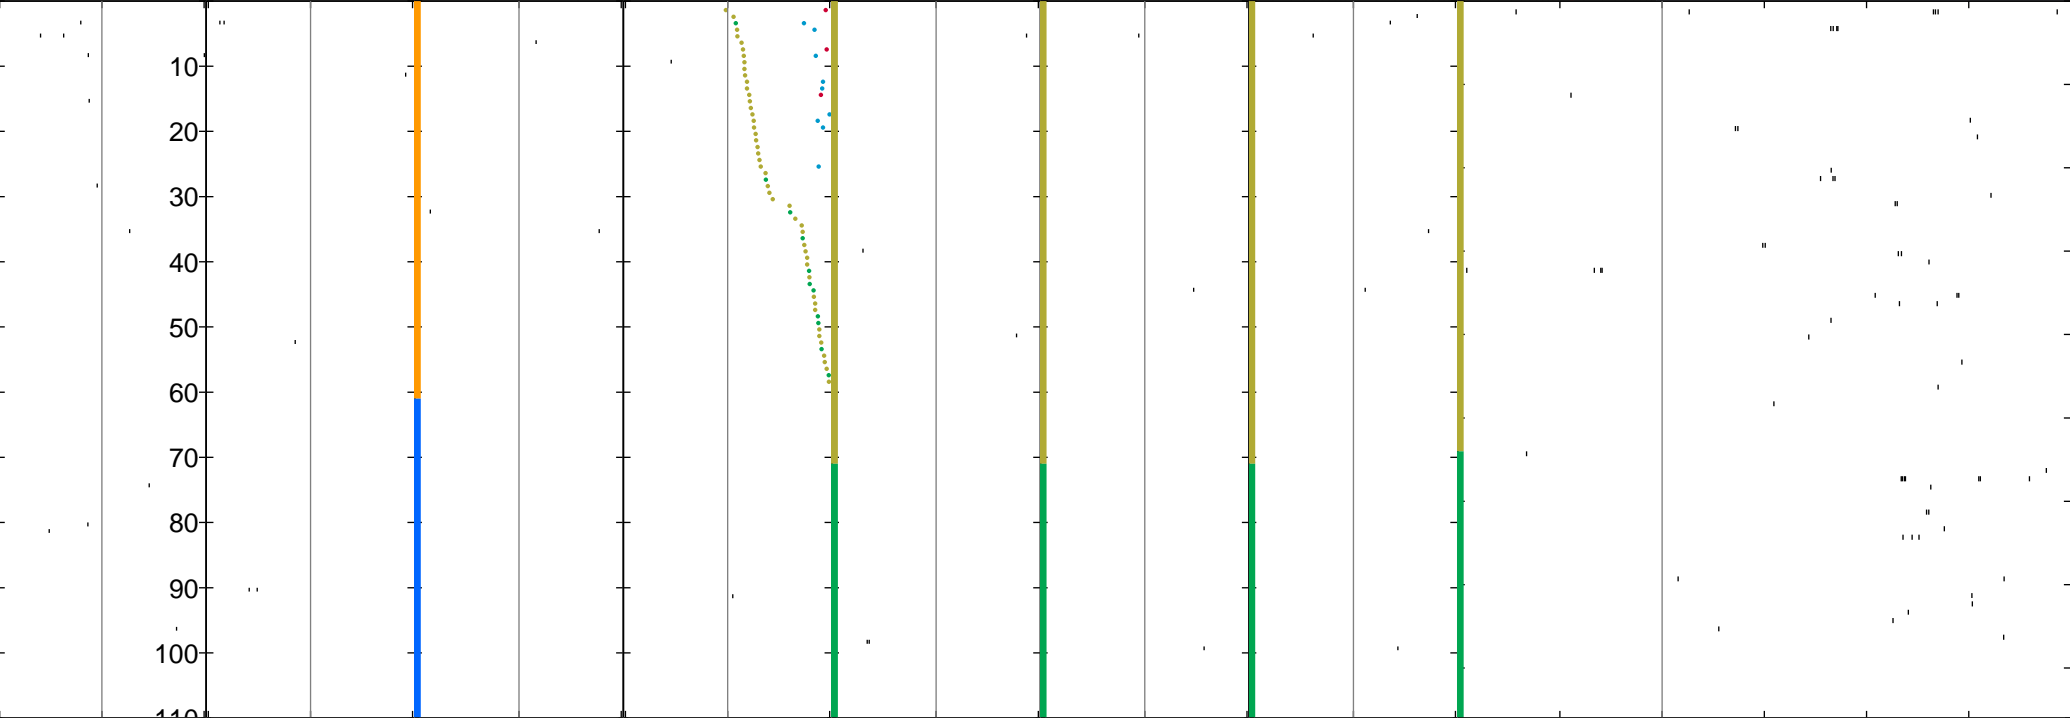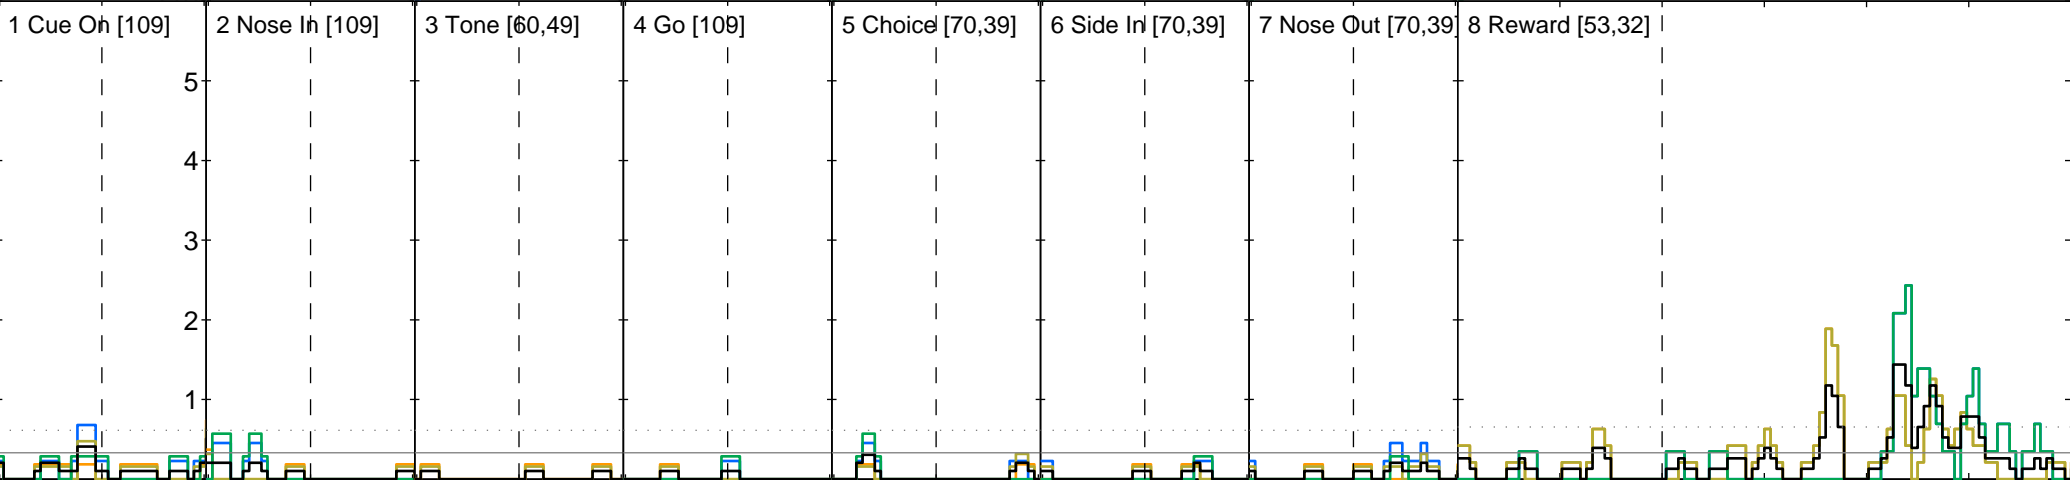

**Cell: C0420070226T05b**

AP: 2.5 ML: 1.3 DV: 6.3  
w: 4 n: 73  $P_{ISI>2}$ : 1  
1/2pw: 160 $\mu$ s p->v: 661 $\mu$ s  
 $\beta_T$ : NaN  $\beta_D$ : NaN  
 $\beta_P$ : NaN SI: NaN  
Session FR: 0.0117 Hz  
Pk Ev: None  
Pk FR: --

MSN

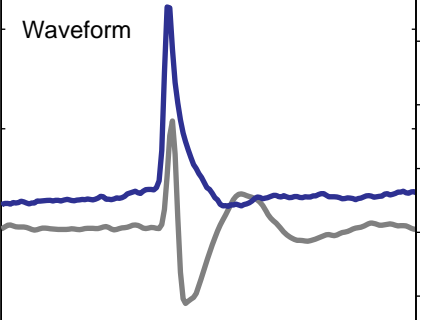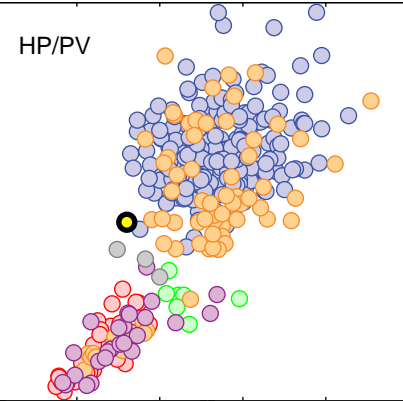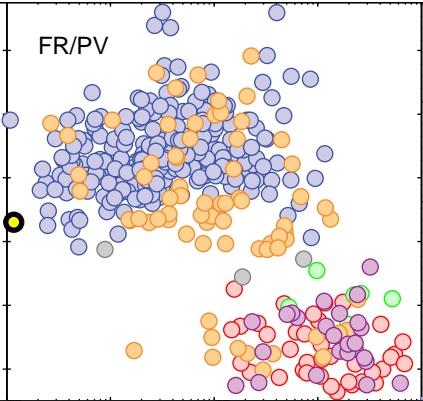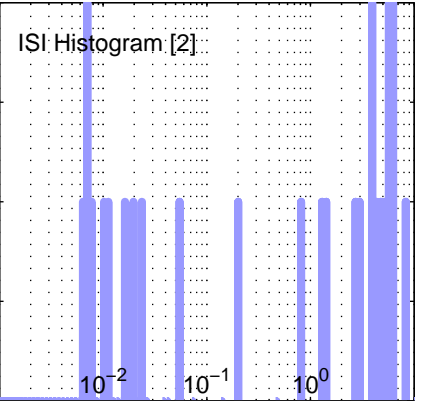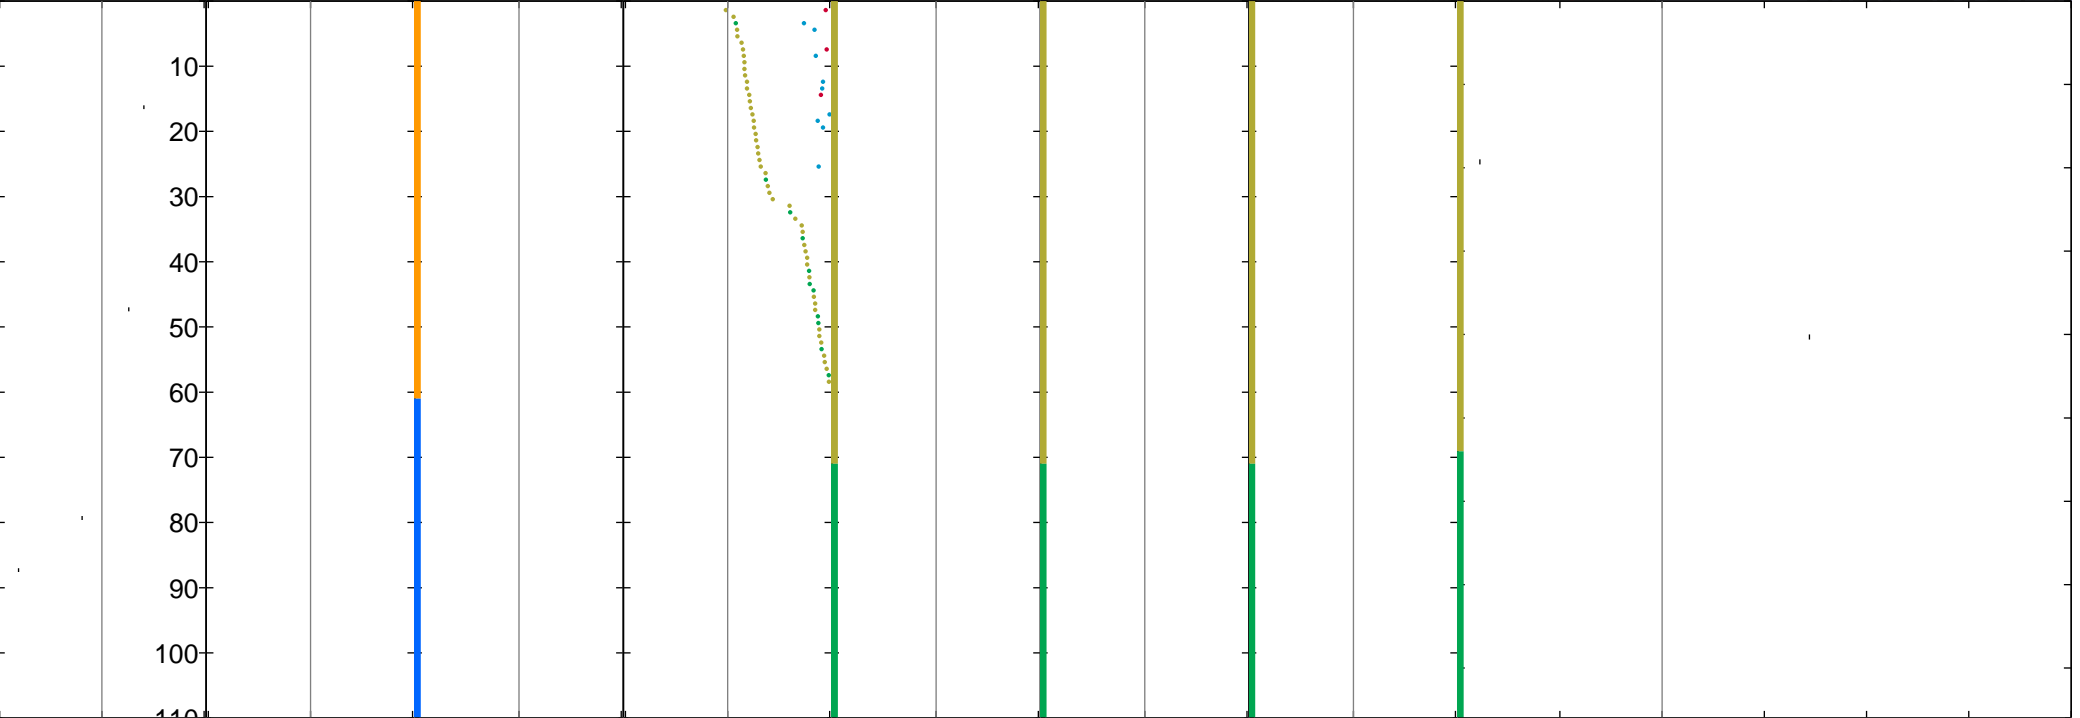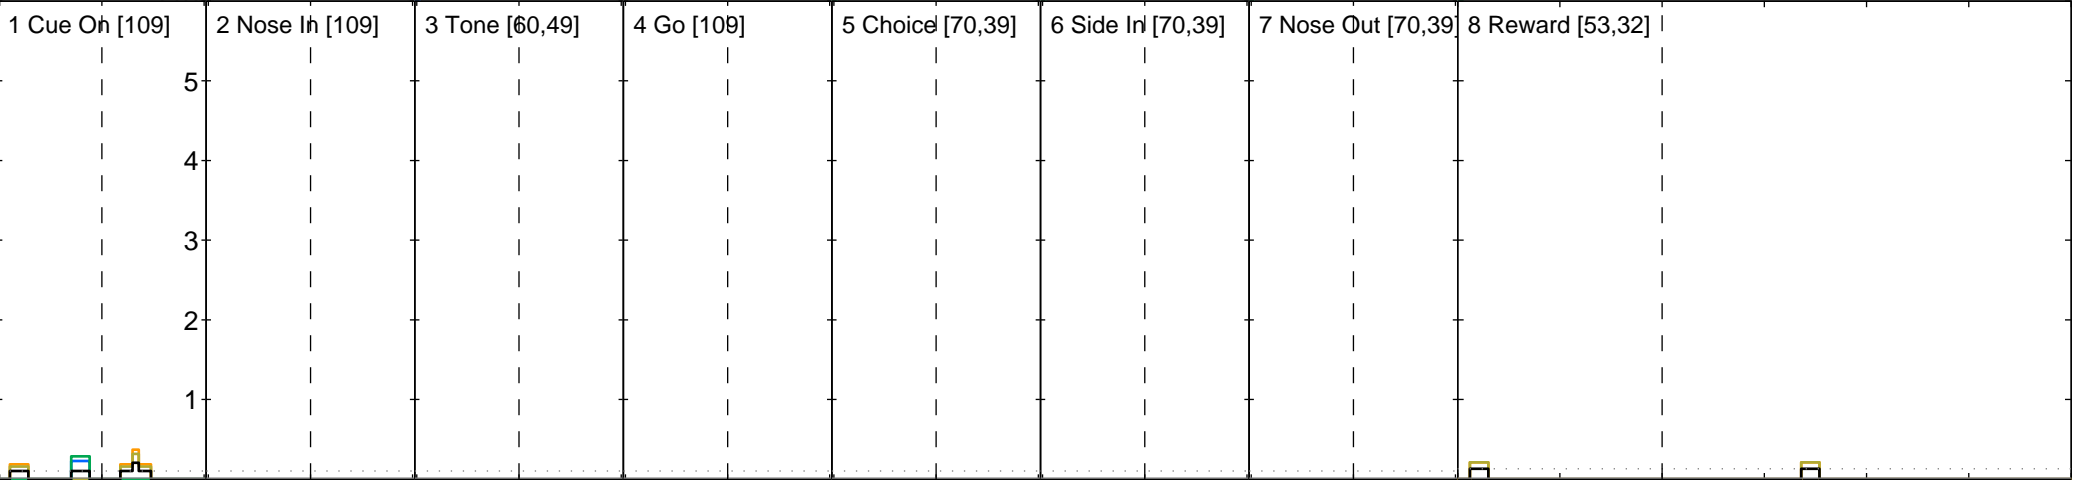

**Cell: C0420070226T06a**

AP: 2 ML: 1.8 DV: 5.2  
w: 3 n: 1467  $P_{ISI>2}$ : 0.95  
1/2pw: 250 $\mu$ s p->v: 891 $\mu$ s  
 $\beta_T$ : NaN  $\beta_D$ : NaN  
 $\beta_P$ : NaN SI: NaN  
Session FR: 0.237 Hz  
Pk Ev: None  
Pk FR: --

MSN

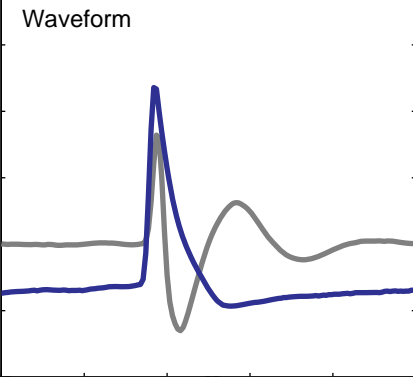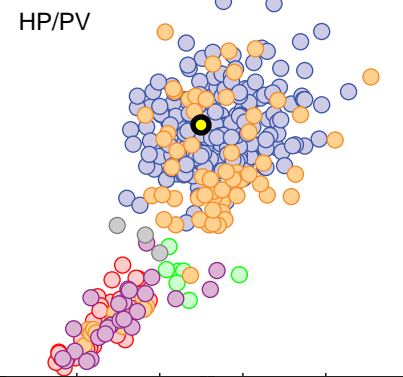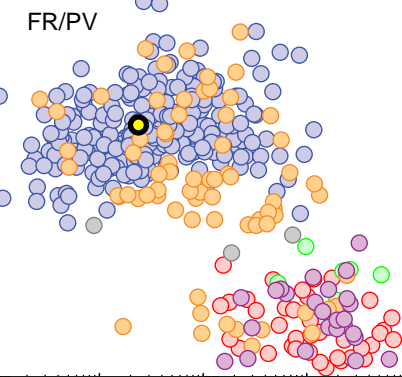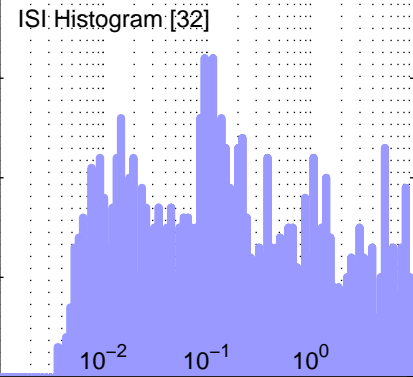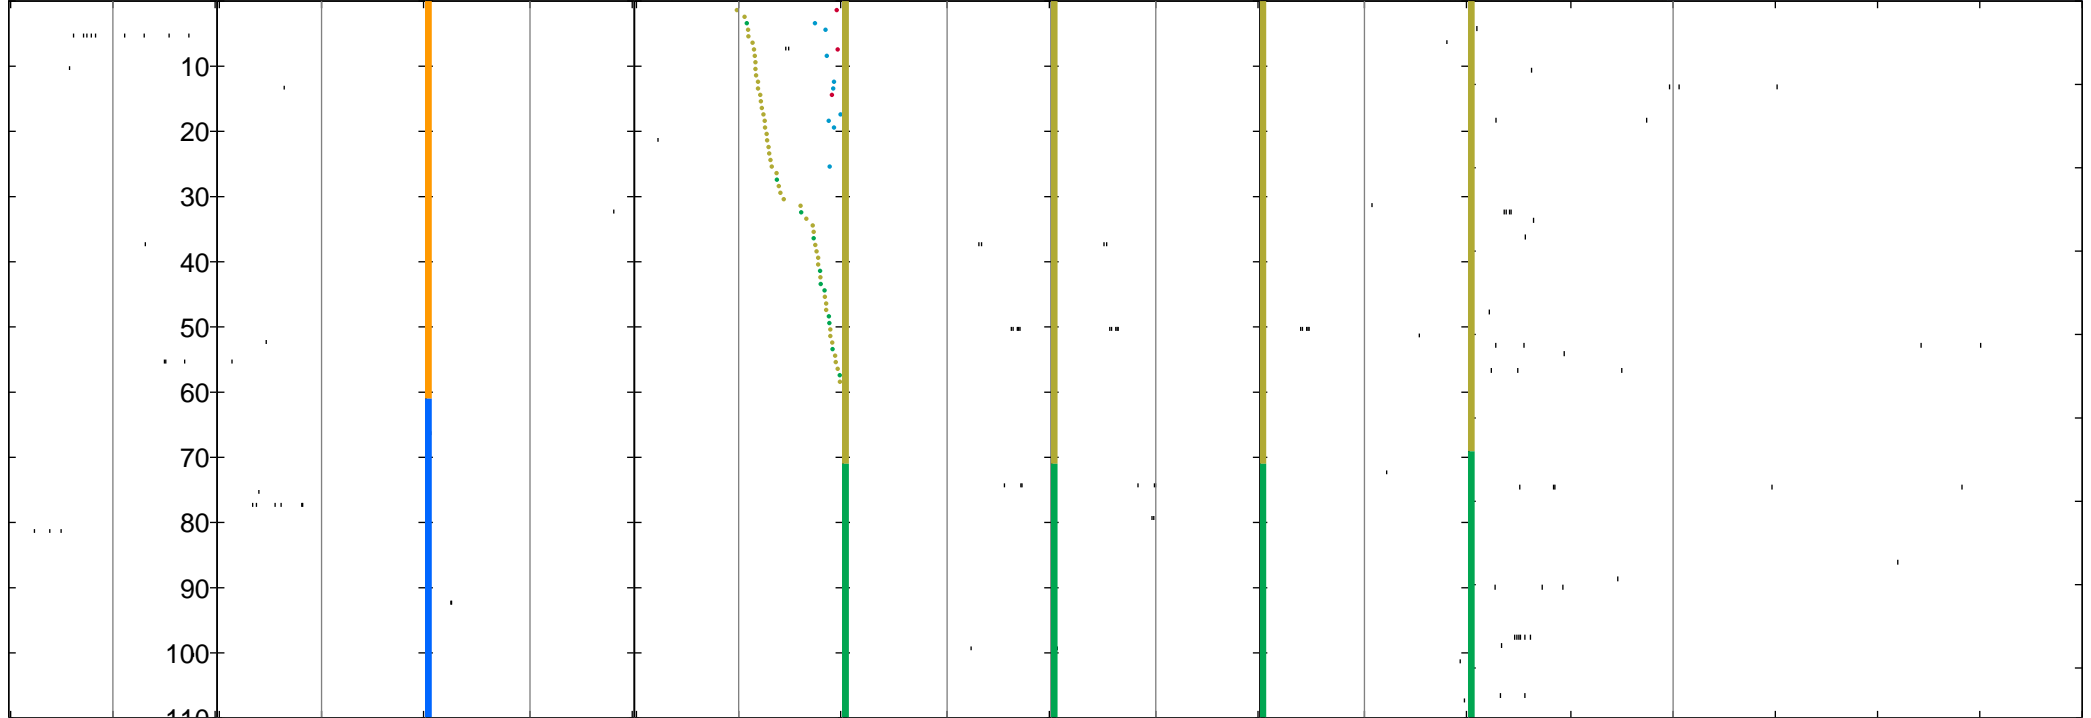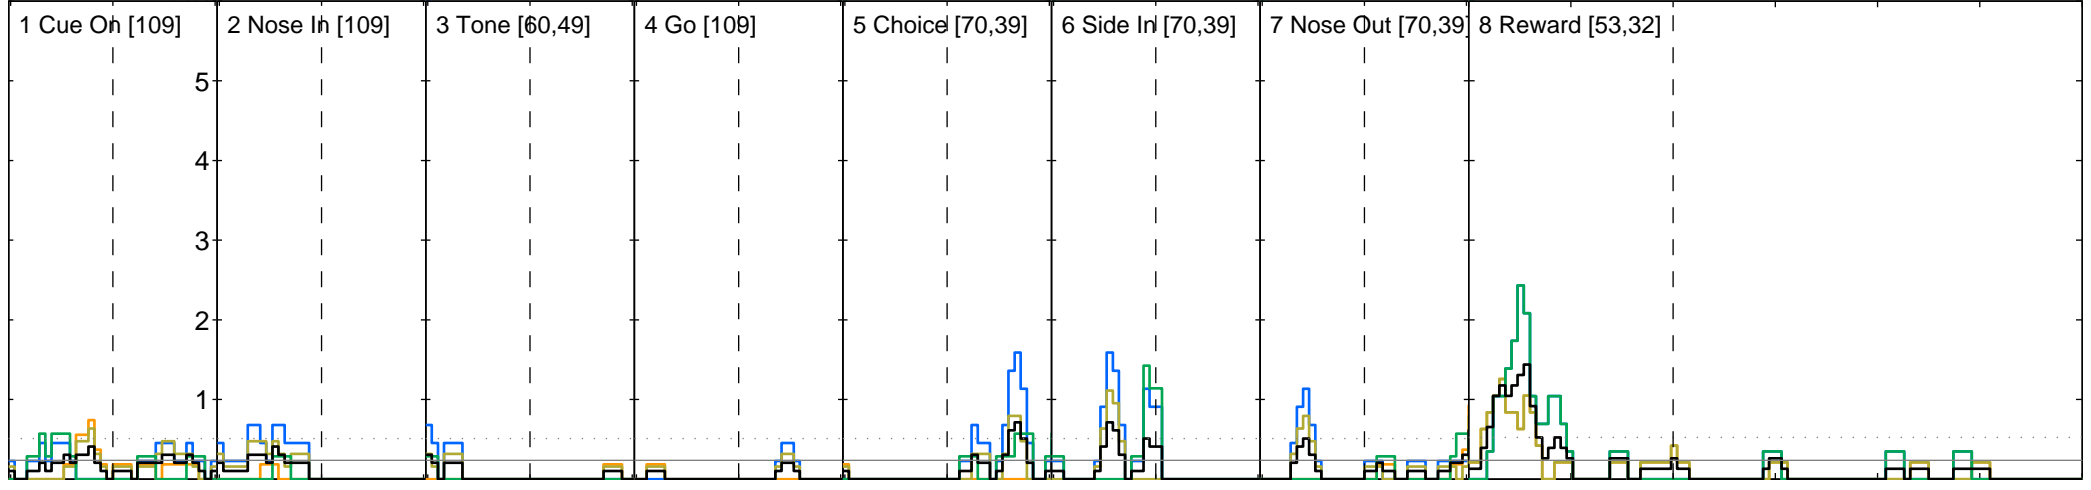

**Cell: C0420070226T06b**

AP: 2 ML: 1.8 DV: 5.2  
w: 3 n: 239  $P_{ISI>2}$ : 1  
1/2pw: 173 $\mu$ s p->v: 981 $\mu$ s  
 $\beta_T$ : NaN  $\beta_D$ : NaN  
 $\beta_P$ : NaN SI: NaN  
Session FR: 0.0389 Hz  
Pk Ev: None  
Pk FR: --

MSN

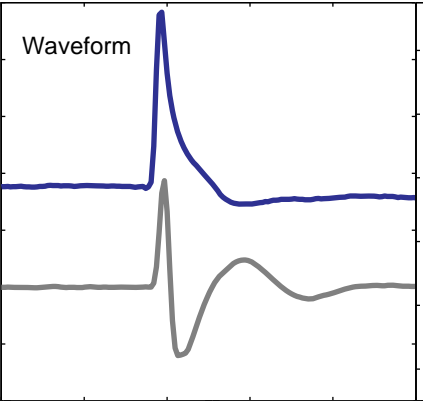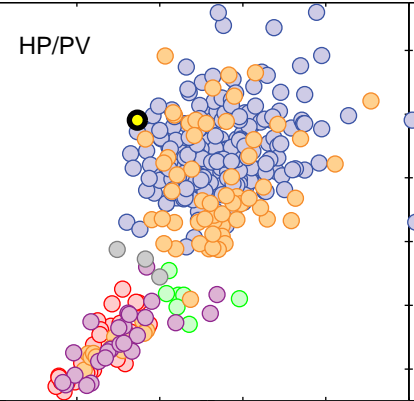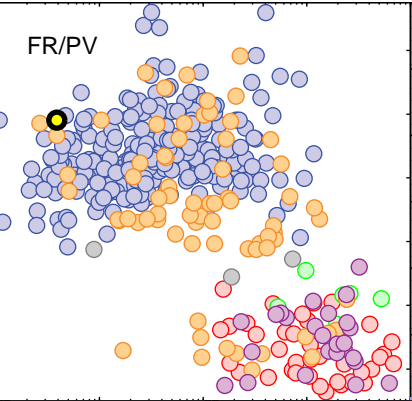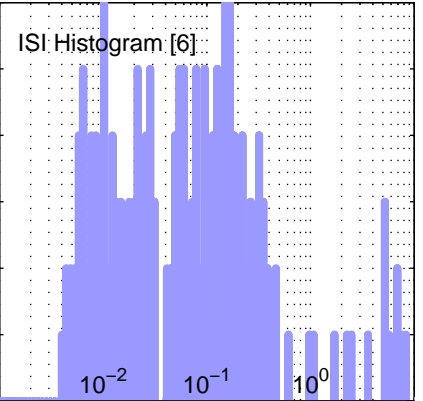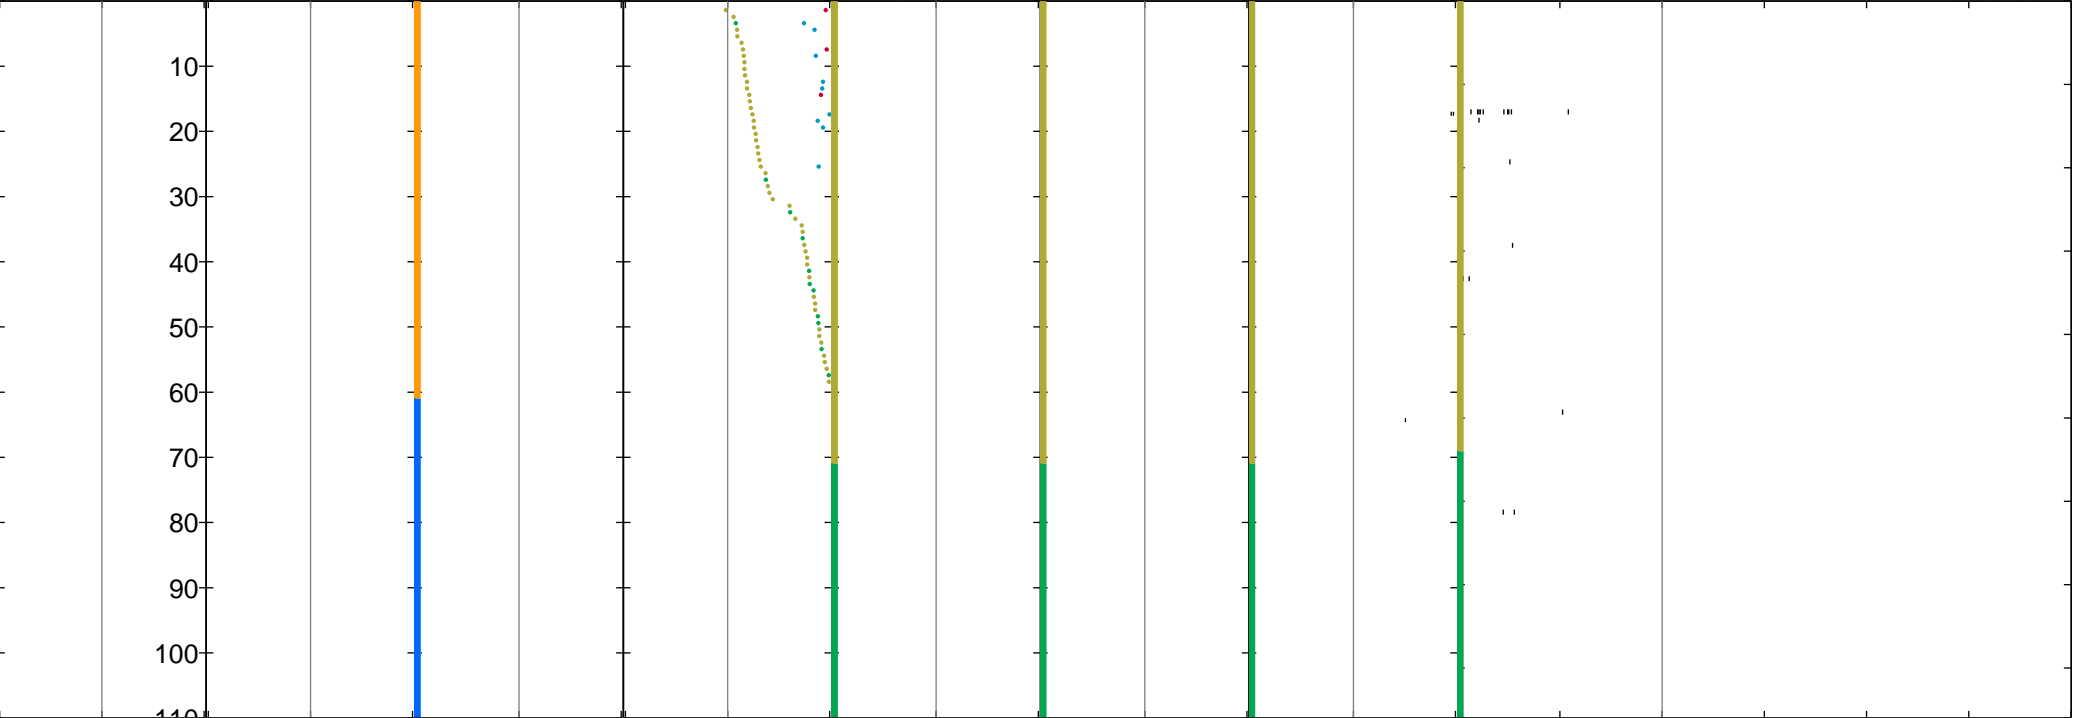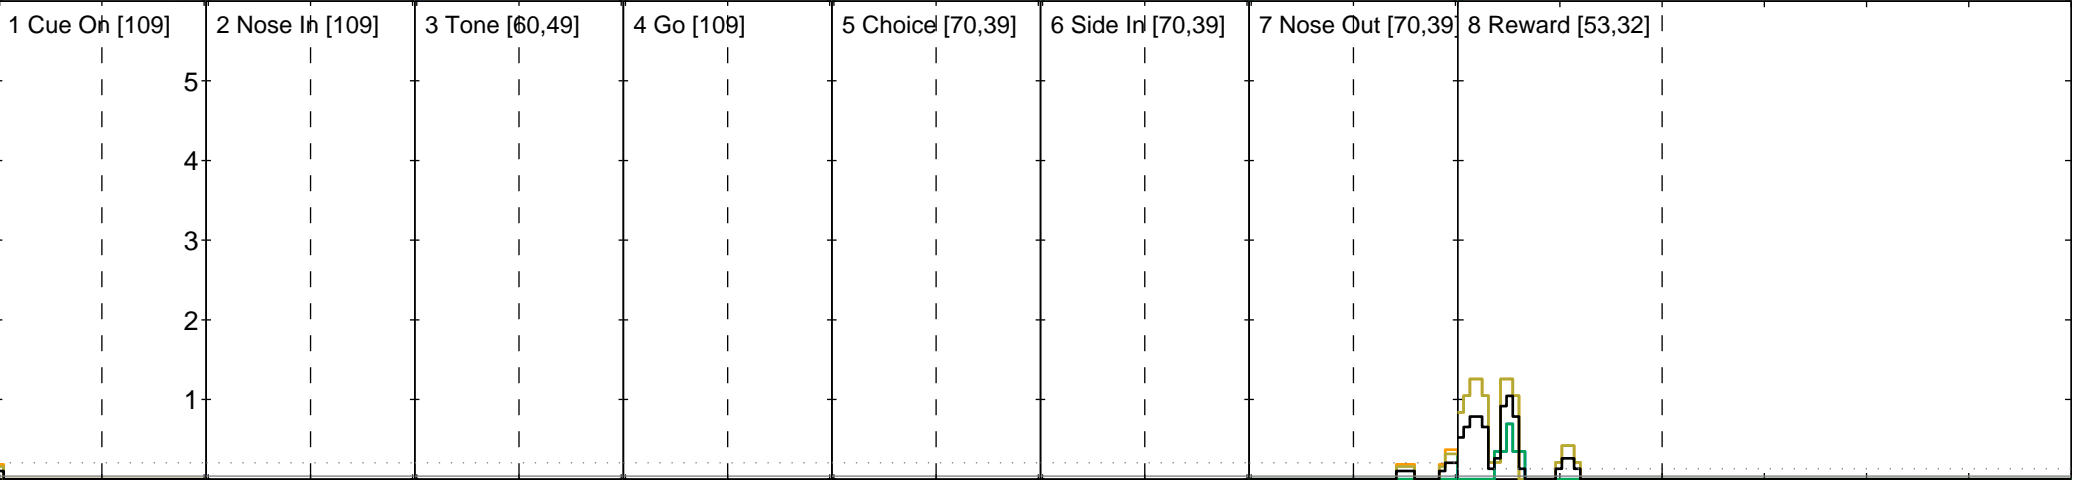

**Cell: C0420070226T06c**

AP: 2 ML: 1.8 DV: 5.2  
w: 4 n: 263  $P_{ISI>2}$ : 0.99  
1/2pw: 246 $\mu$ s p->v: 870 $\mu$ s  
 $\beta_T$ : NaN  $\beta_D$ : NaN  
 $\beta_P$ : NaN SI: NaN  
Session FR: 0.042 Hz  
Pk Ev: None  
Pk FR: --

MSN

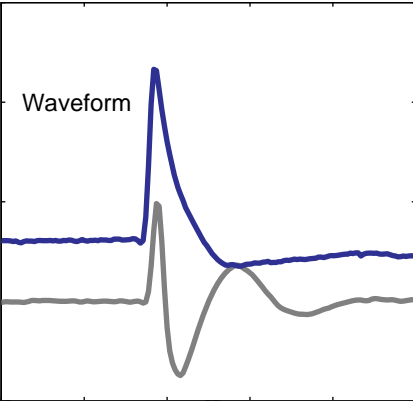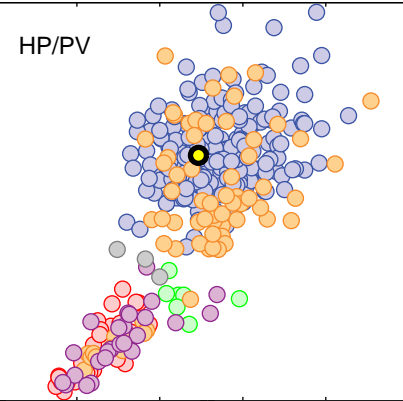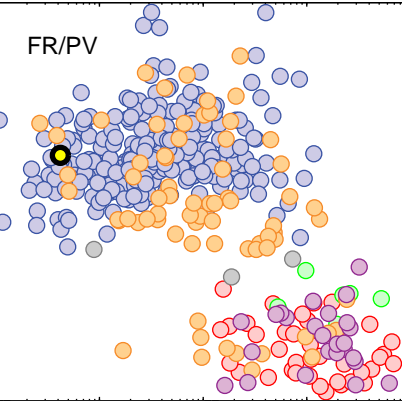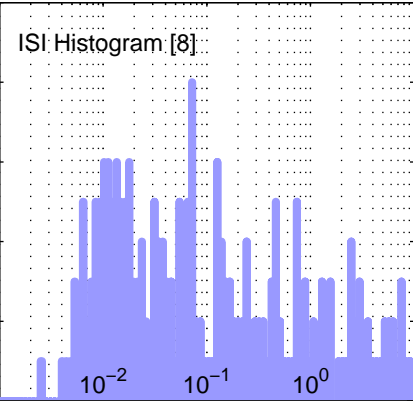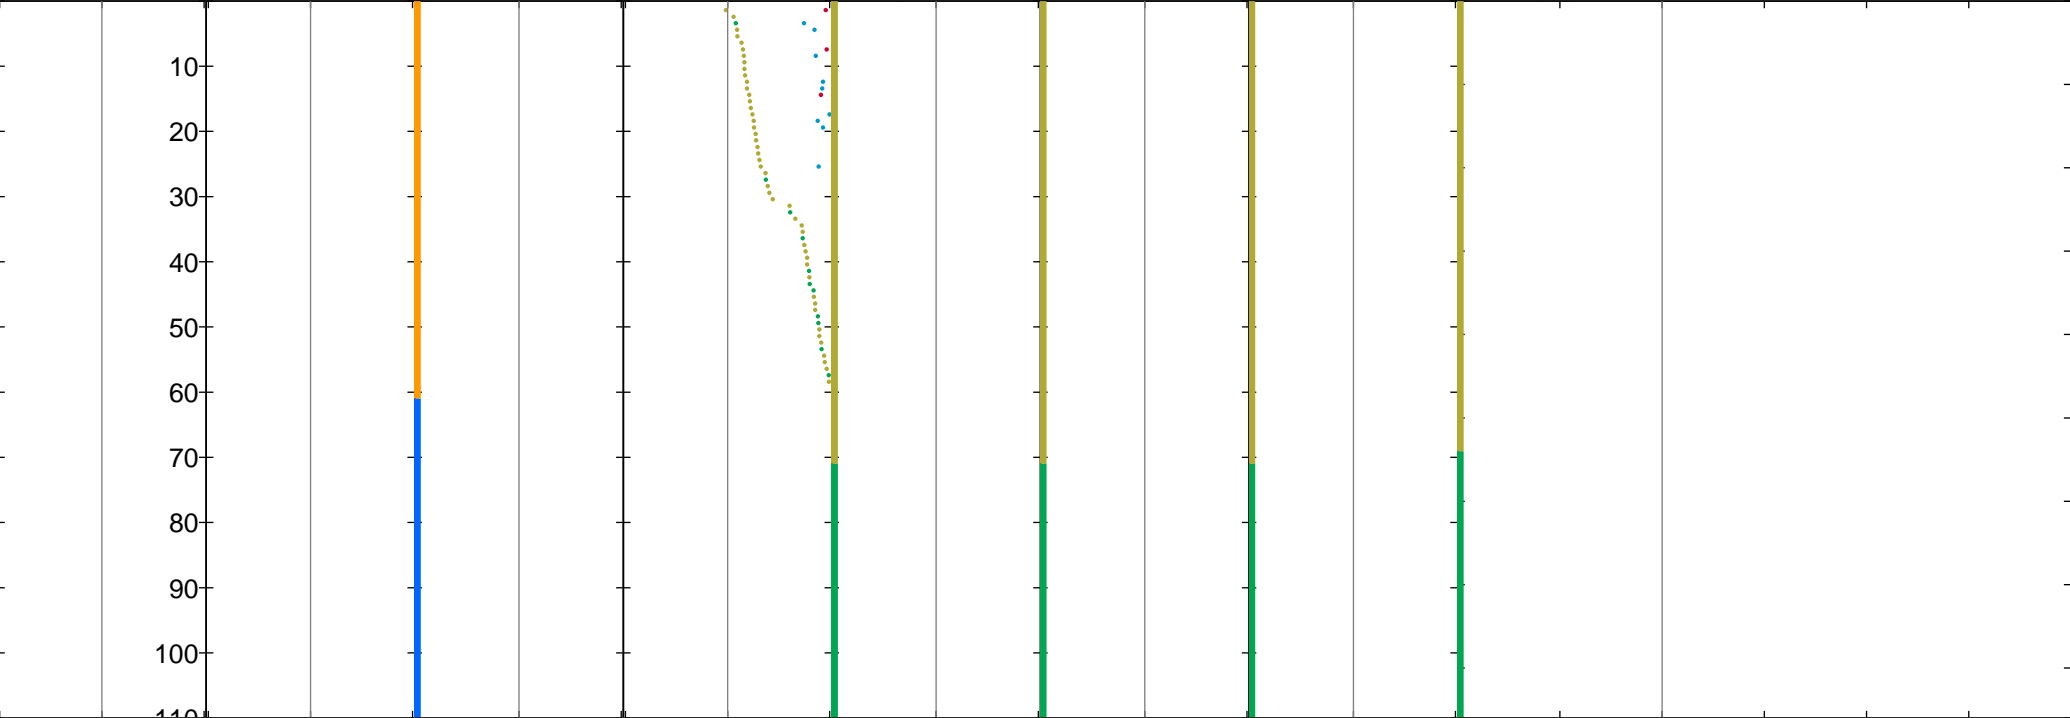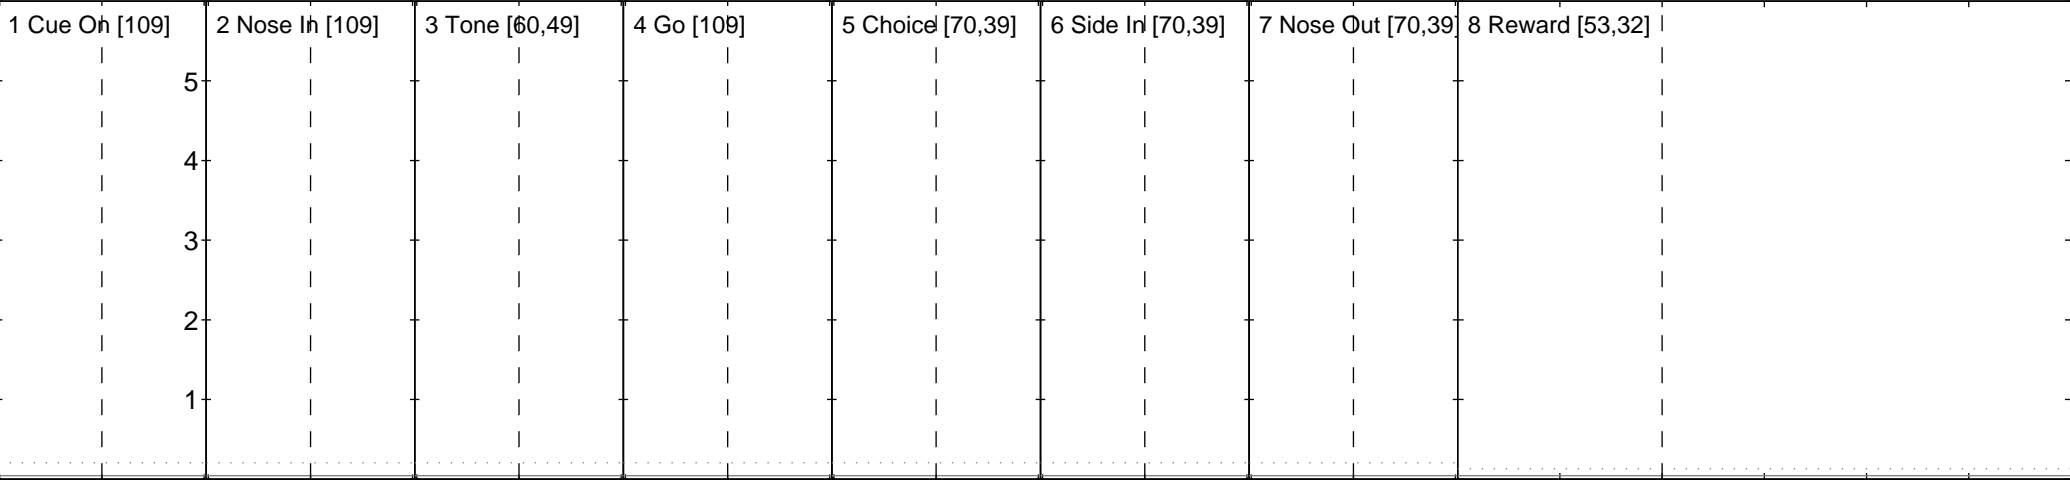

**Cell: C0420070226T06d**

AP: 2 ML: 1.8 DV: 5.2

w: 4 n: 1242  $P_{ISI>2}$ : 0.94

1/2pw: 286 $\mu$ s p->v: 1045 $\mu$ s

$\beta_T$ : NaN  $\beta_D$ : NaN

$\beta_P$ : NaN SI: NaN

Session FR: 0.199 Hz

Pk Ev: None

Pk FR: --

MSN

Waveform

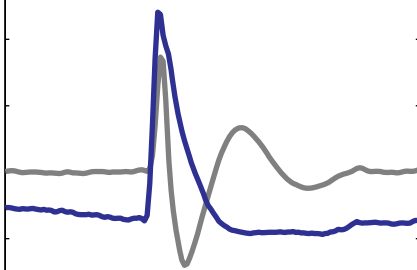

HP/PV

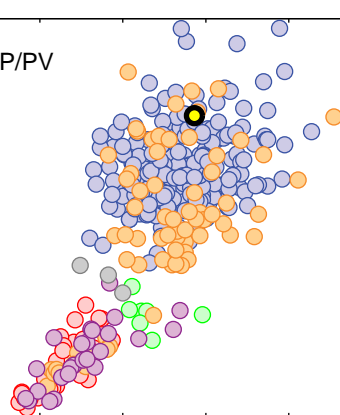

FR/PV

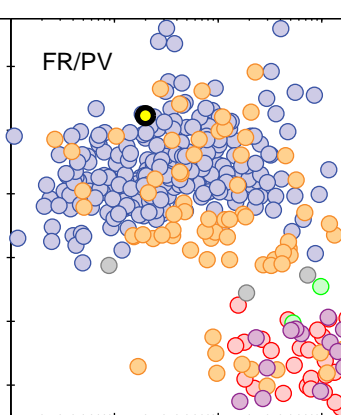

ISI Histogram [35]

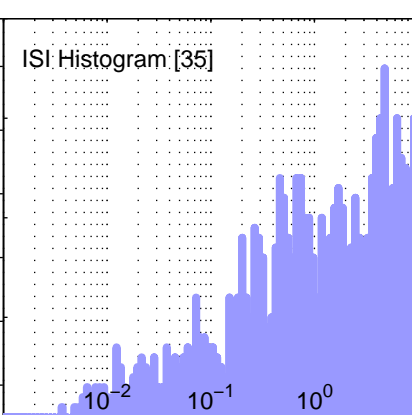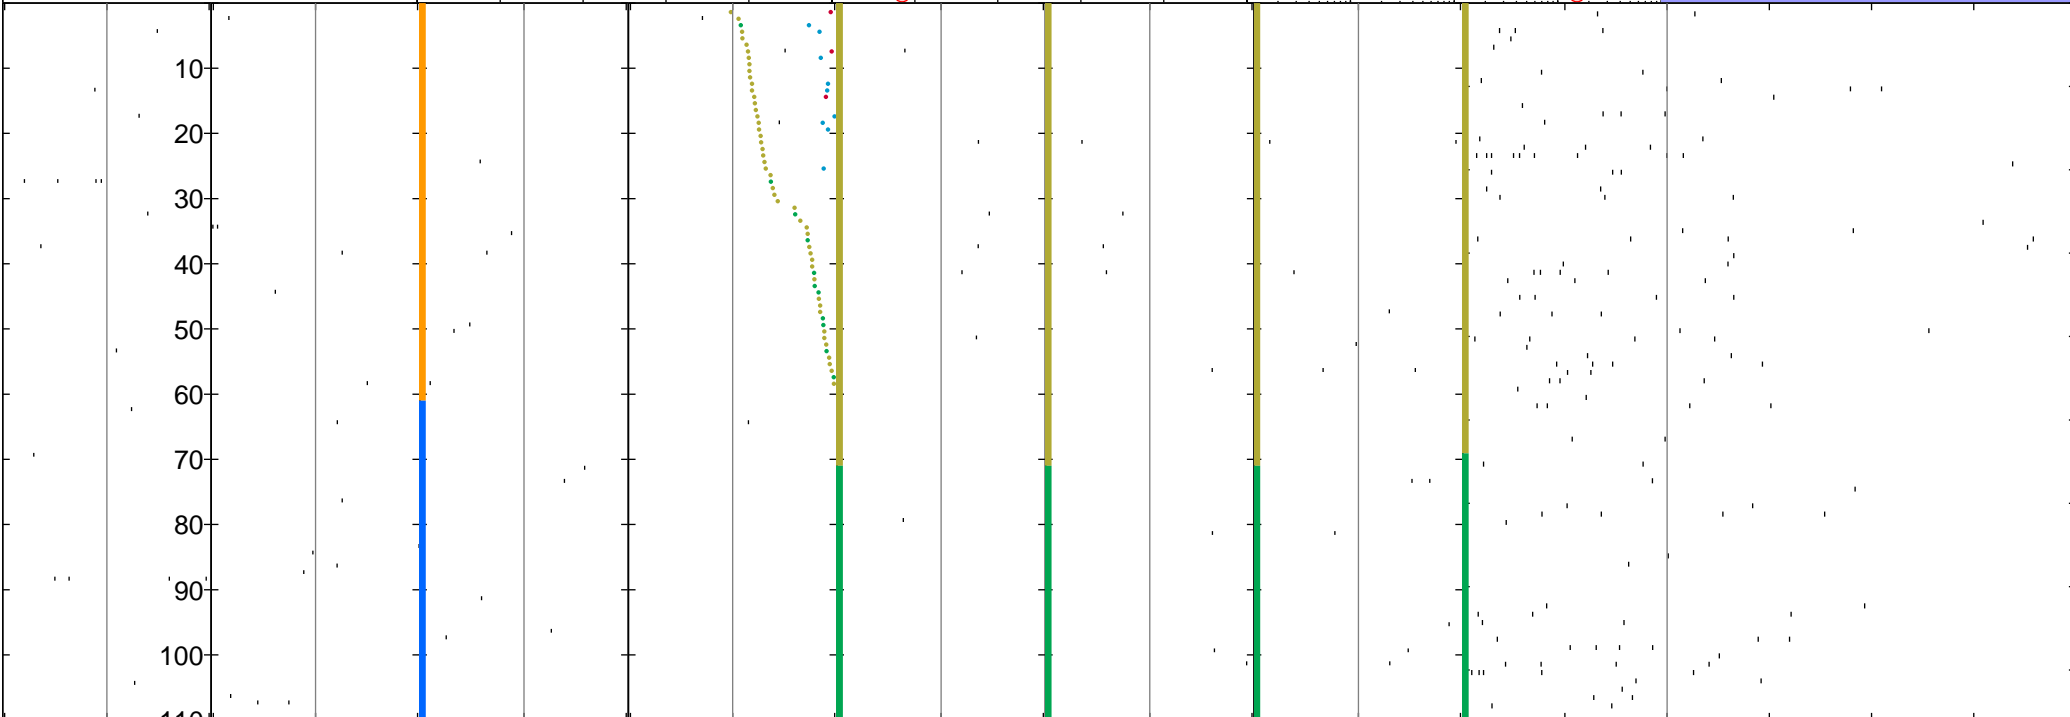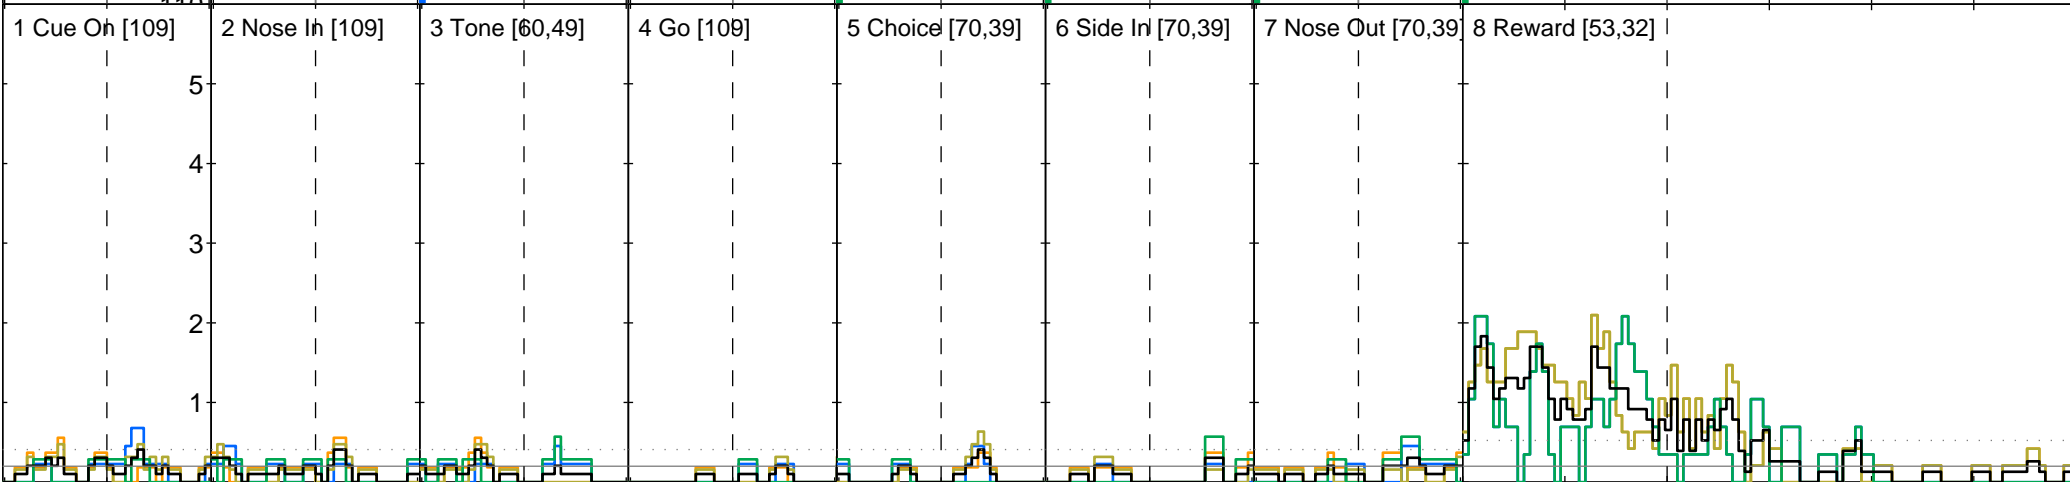

**Cell: C0420070226T06e**

AP: 2 ML: 1.8 DV: 5.2  
w: 2 n: 770  $P_{ISI>2}$ : 0.98  
1/2pw: 251 $\mu$ s p->v: 861 $\mu$ s  
 $\beta_T$ : 0.47  $\beta_D$ : -2.7  
 $\beta_P$ : -3.1 SI: NaN  
Session FR: 0.128 Hz  
Pk Ev: None  
Pk FR: --

MSN

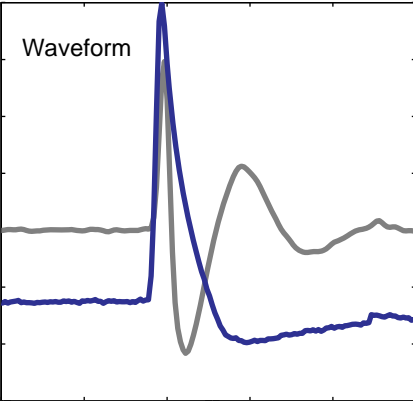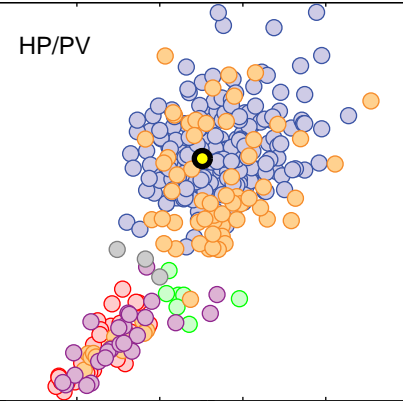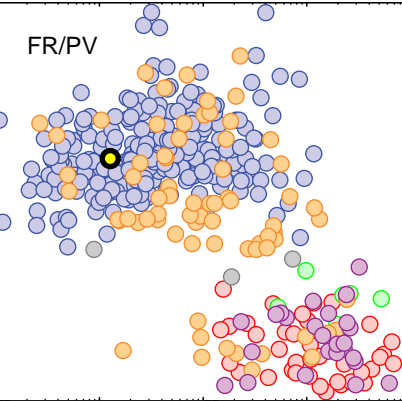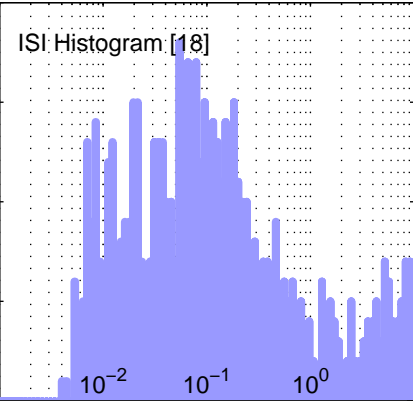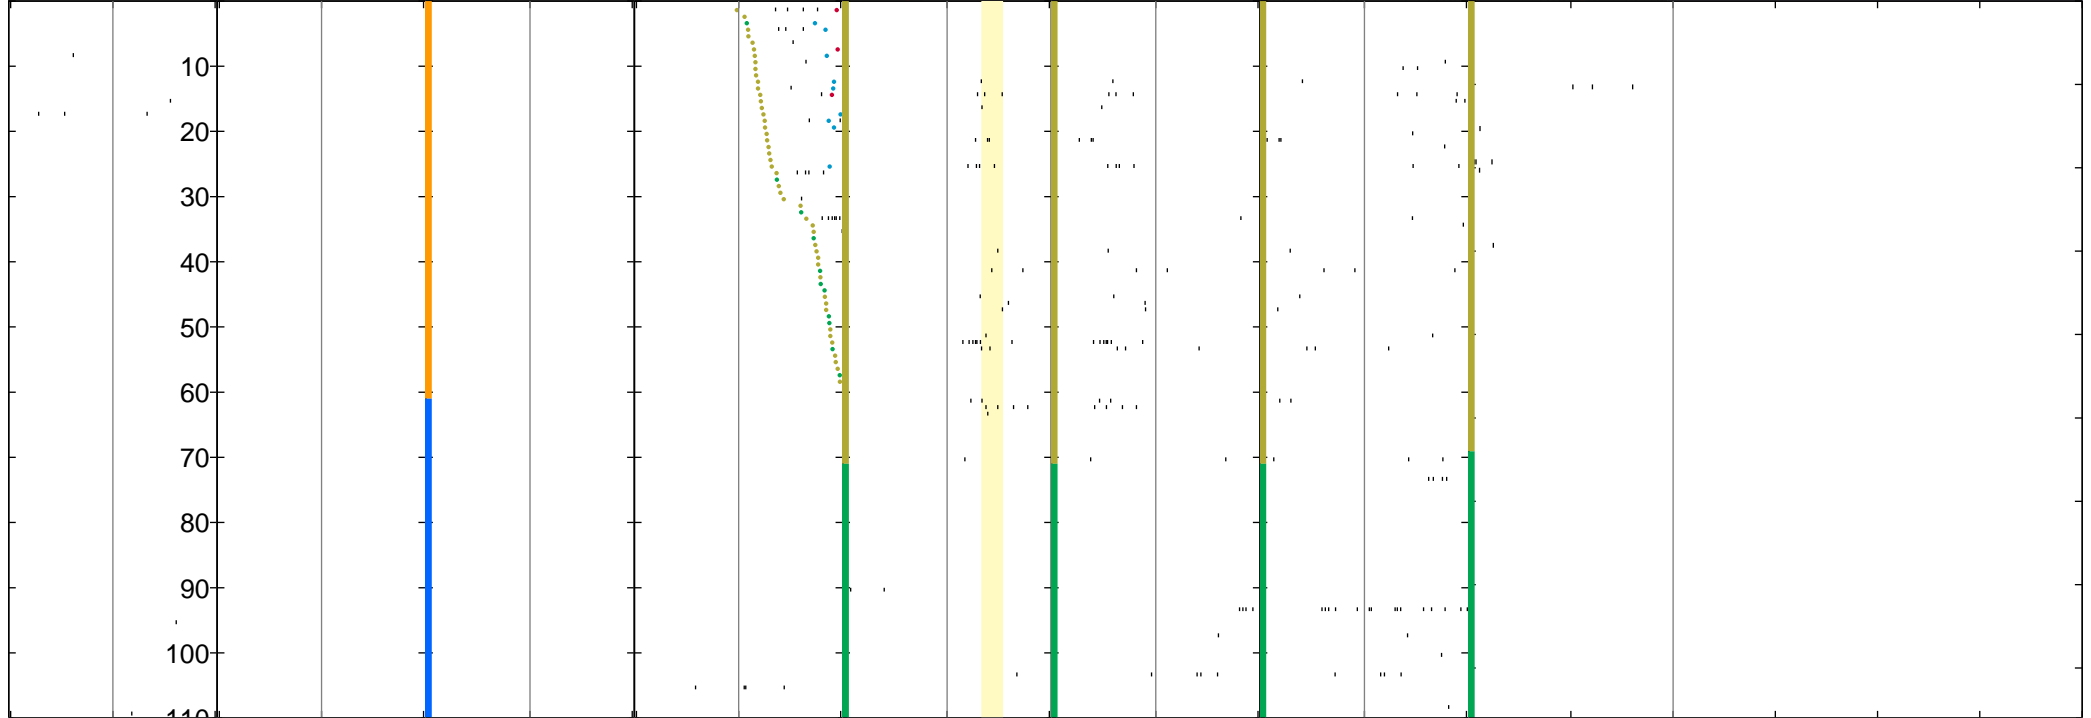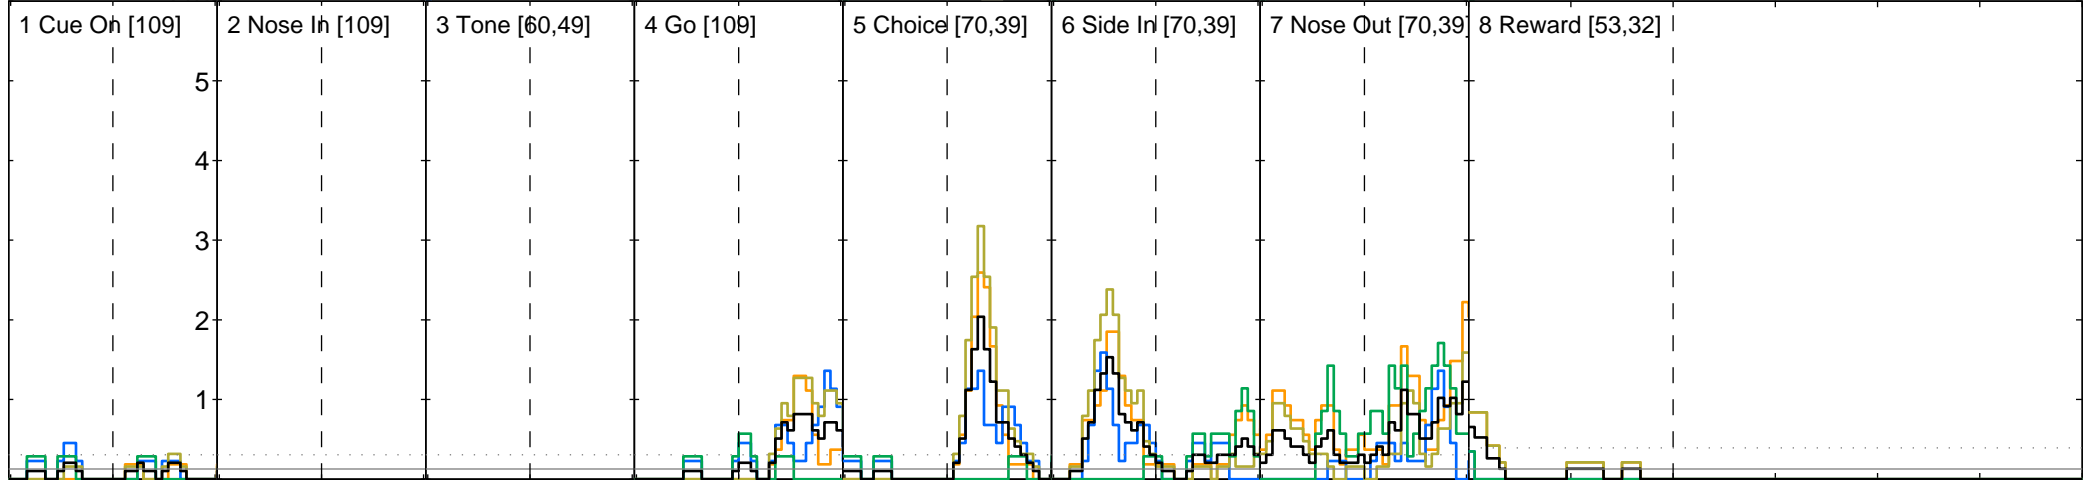

**Cell: C0420070226T06F**

AP: 2 ML: 1.8 DV: 5.2  
w: 4 n: 491  $P_{ISI>2}$ : 0.98  
1/2pw: 333 $\mu$ s p->v: 858 $\mu$ s  
 $\beta_T$ : NaN  $\beta_D$ : NaN  
 $\beta_P$ : NaN SI: NaN  
Session FR: 0.0798 Hz  
Pk Ev: None  
Pk FR: --

MSN

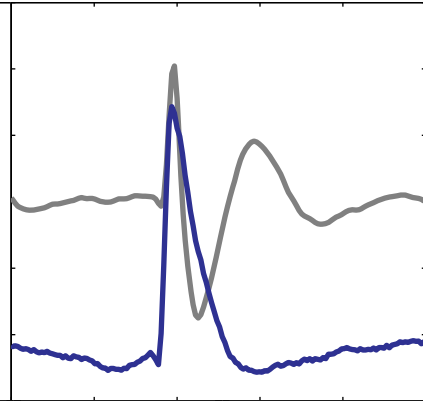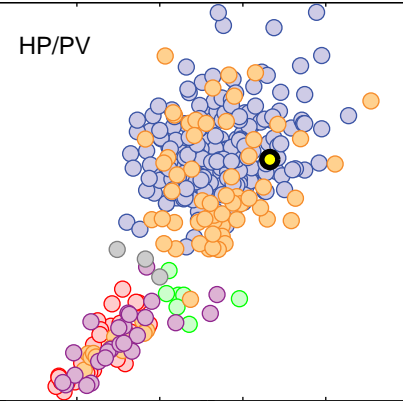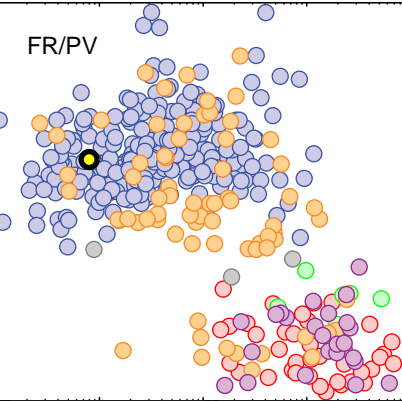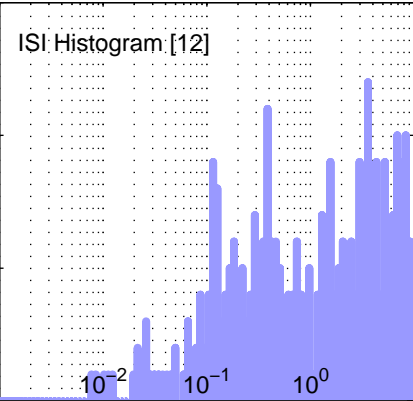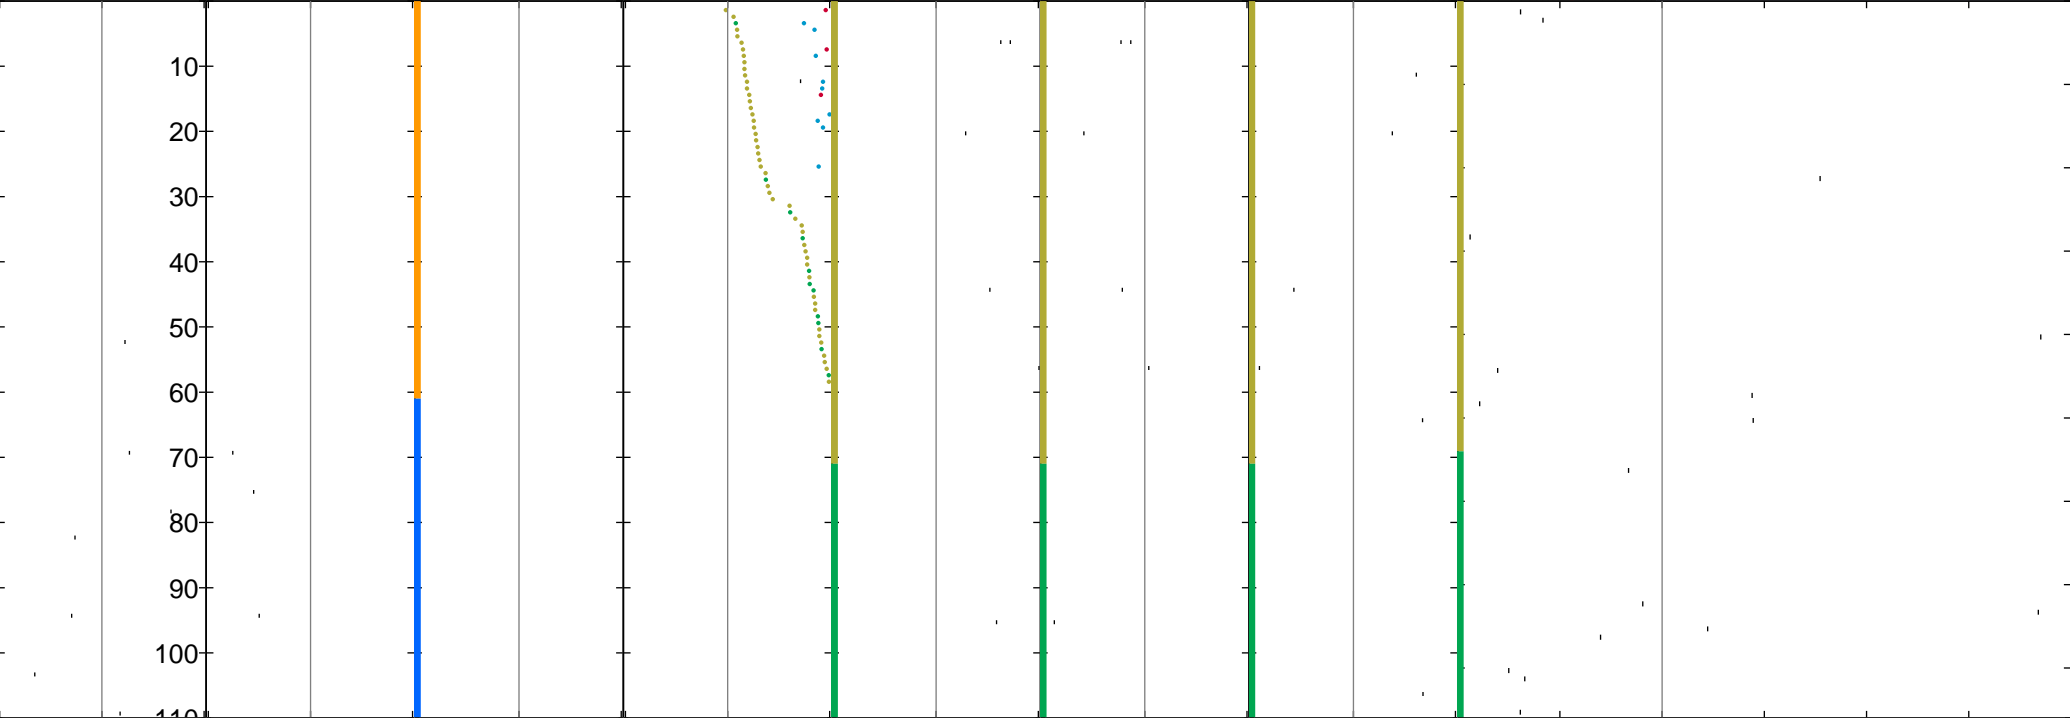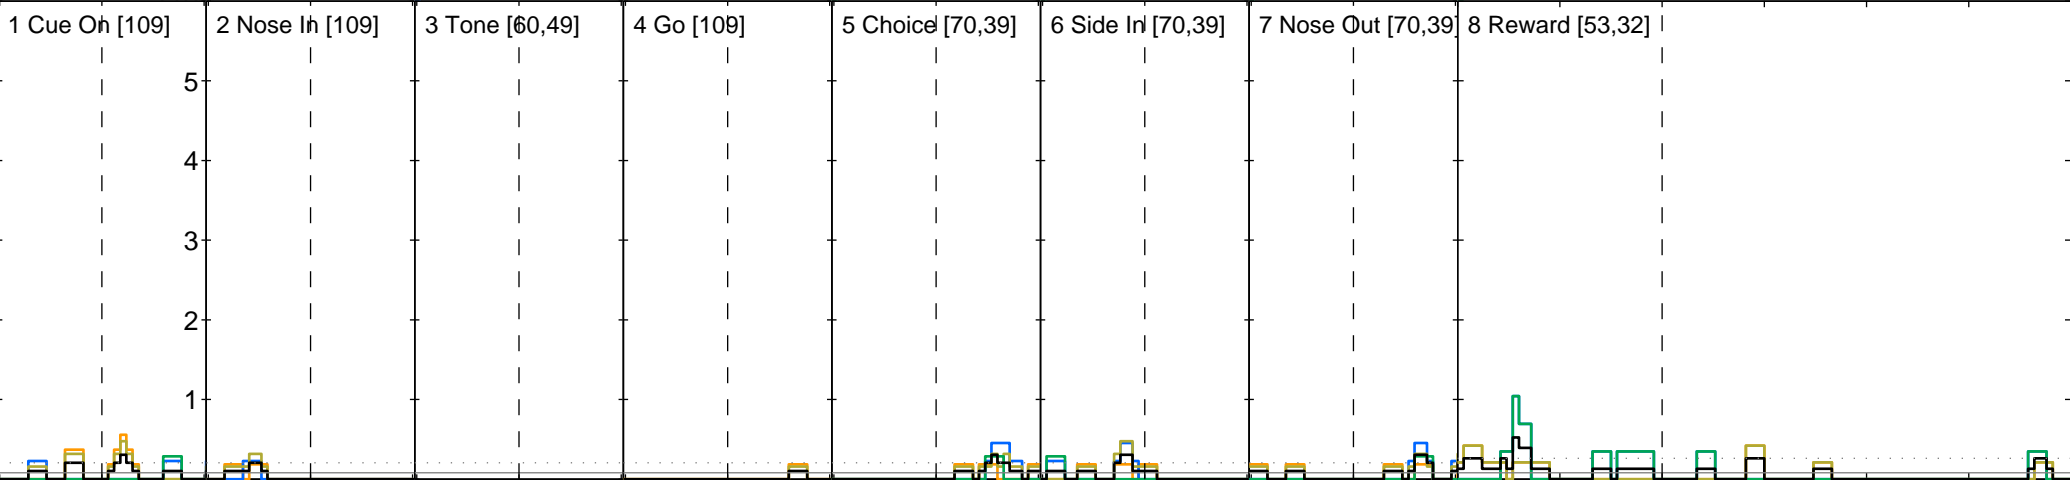



**Cell: C0420070314T04a**

AP: 2.5 ML: 1.8 DV: 5.8  
w: 4 n: 1450  $P_{ISI>2}$ : 0.95  
1/2pw: 293 $\mu$ s p->v: 858 $\mu$ s  
 $\beta_T$ : NaN  $\beta_D$ : NaN  
 $\beta_P$ : NaN SI: NaN  
Session FR: 0.195 Hz  
Pk Ev: None  
Pk FR: --

MSN

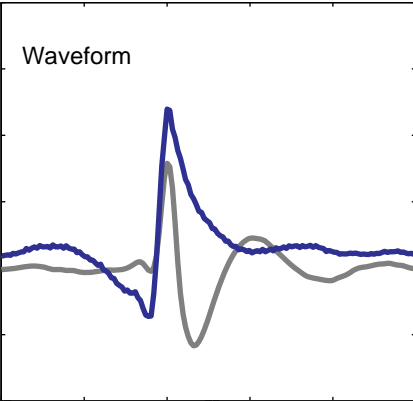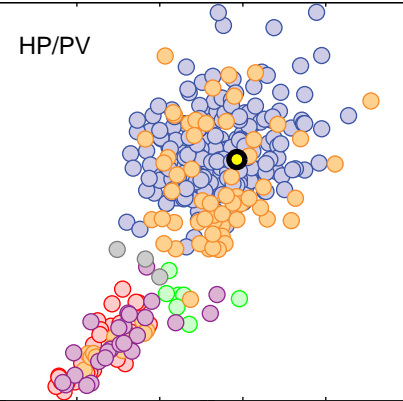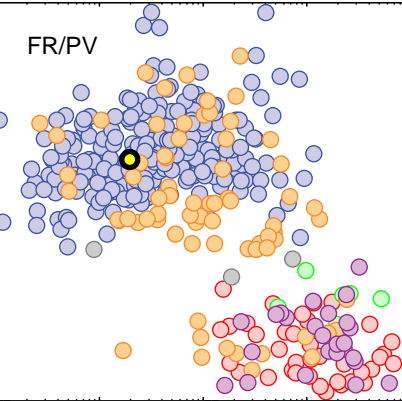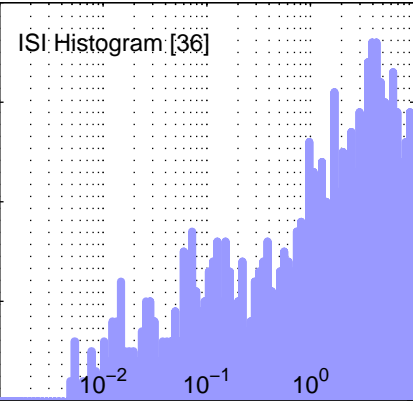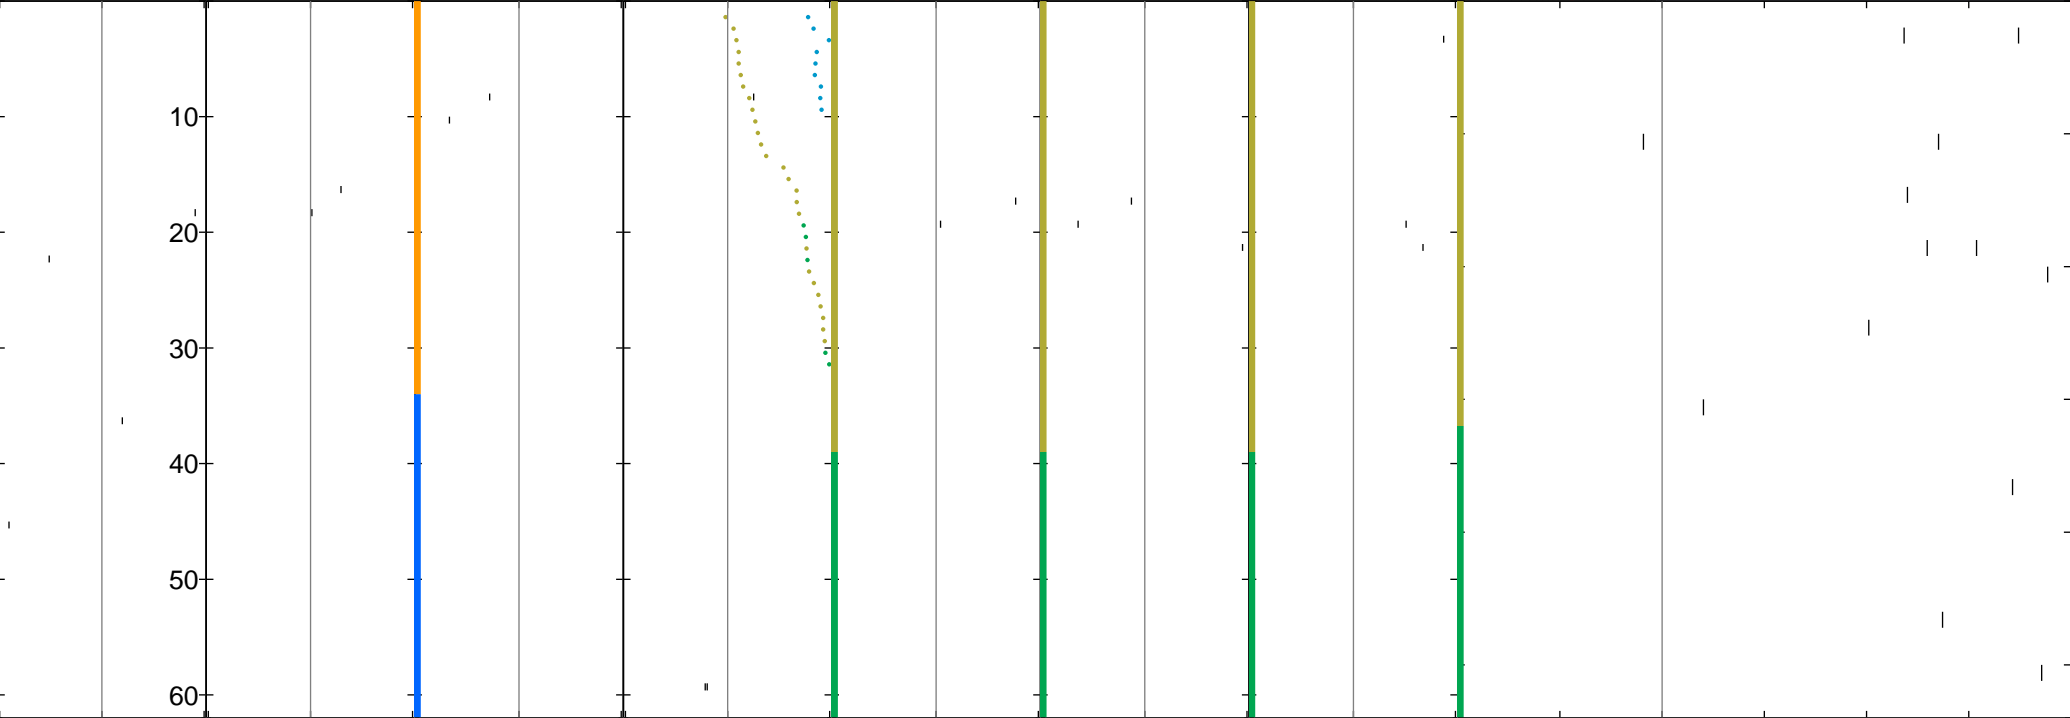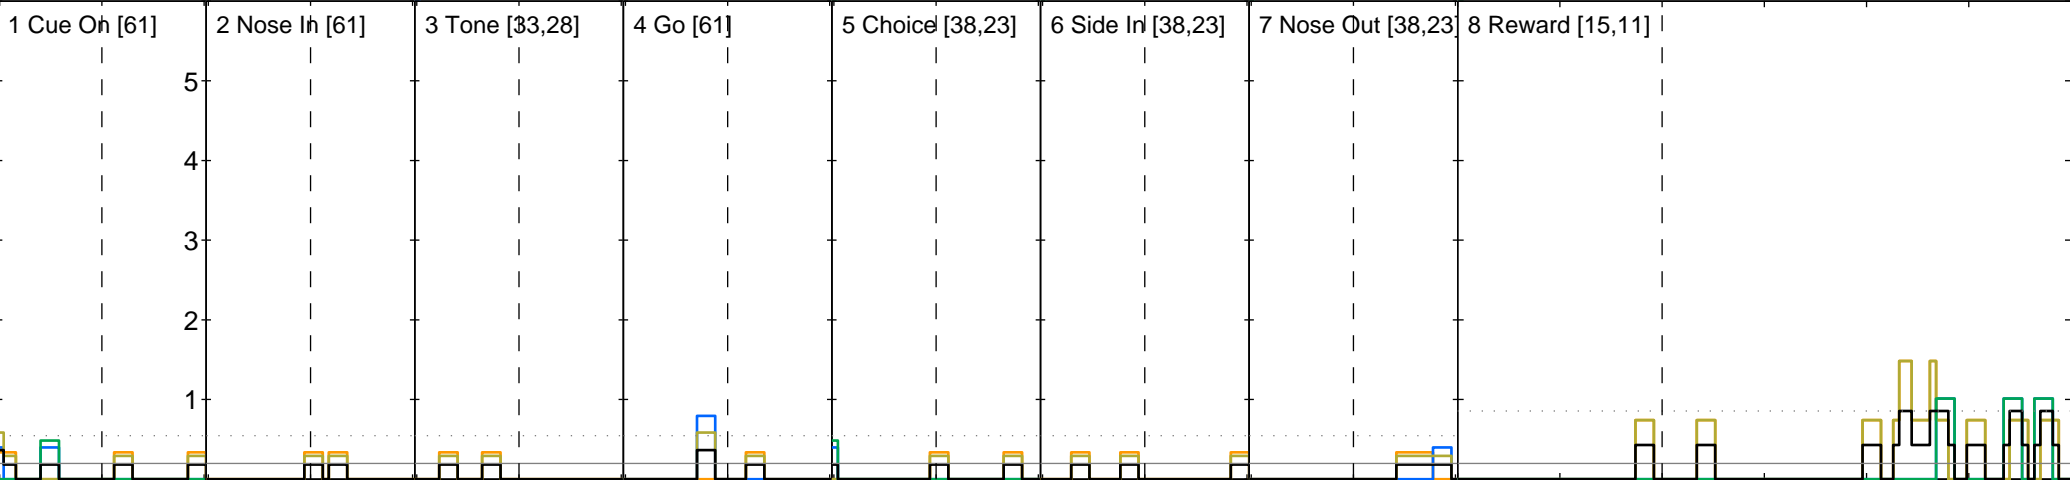

**Cell: C0420070314T05c**

AP: 2.5 ML: 1.3 DV: 6.7  
w: 4 n: 210  $P_{ISI>2}$ : 0.99  
1/2pw: 216 $\mu$ s p->v: 763 $\mu$ s  
 $\beta_T$ : NaN  $\beta_D$ : NaN  
 $\beta_P$ : NaN SI: NaN  
Session FR: 0.0293 Hz  
Pk Ev: None  
Pk FR: --

MSN

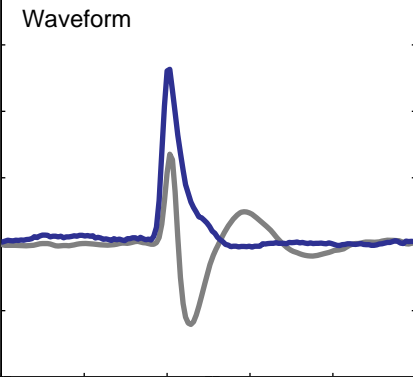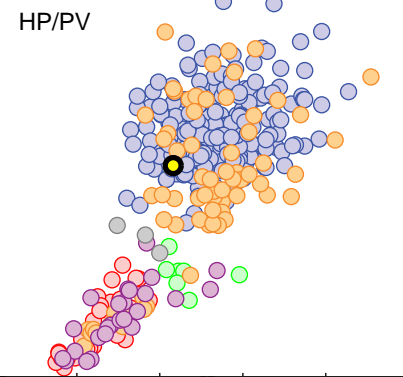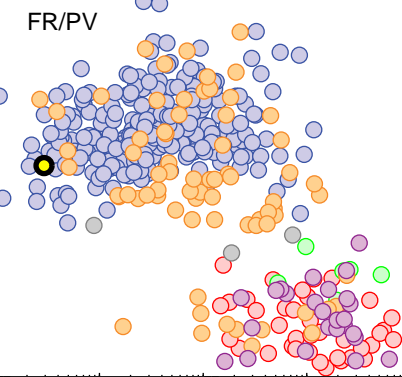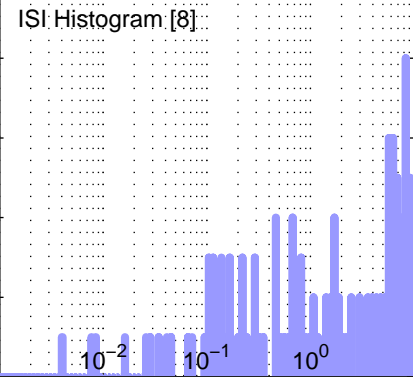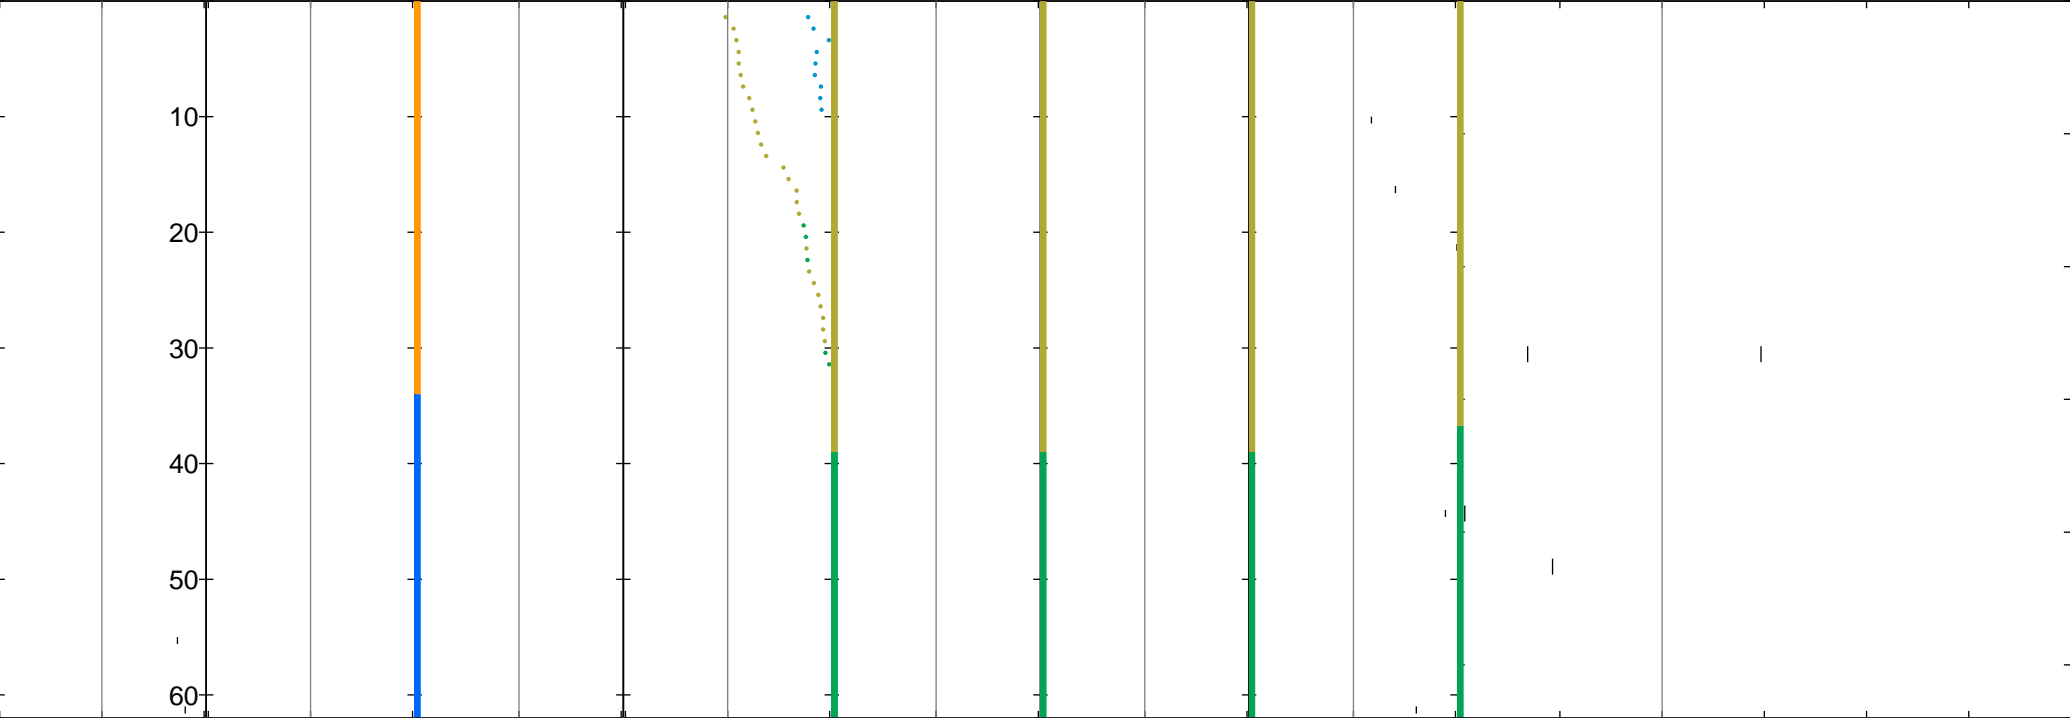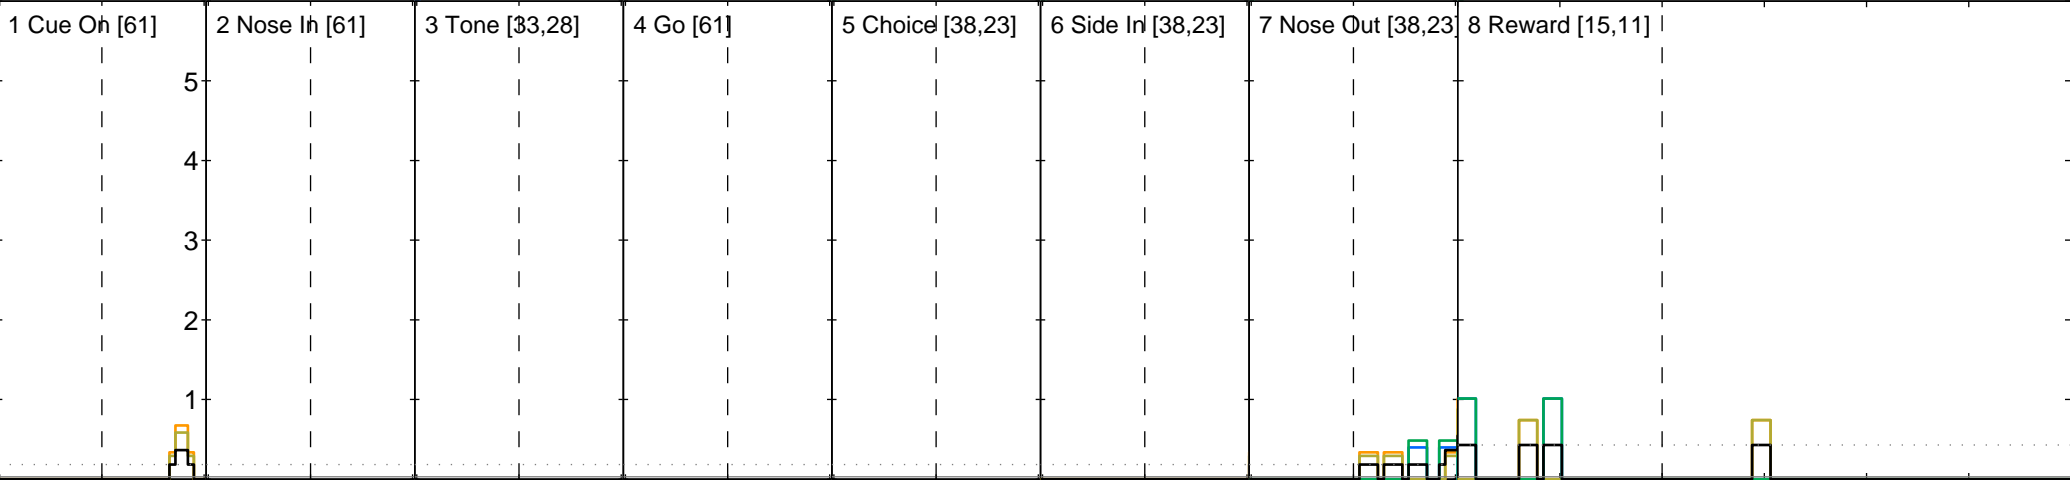

**Cell: C0420070314T05e**

AP: 2.5 ML: 1.3 DV: 6.7  
w: 4 n: 3326  $P_{ISI>2}$ : 0.79  
1/2pw: 232 $\mu$ s p->v: 1148 $\mu$ s  
 $\beta_T$ : NaN  $\beta_D$ : NaN  
 $\beta_P$ : NaN SI: NaN  
Session FR: 0.448 Hz  
Pk Ev: None  
Pk FR: --

MSN

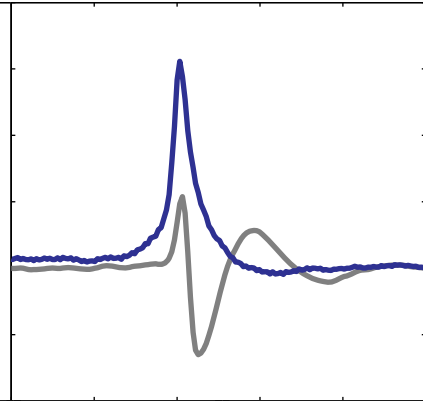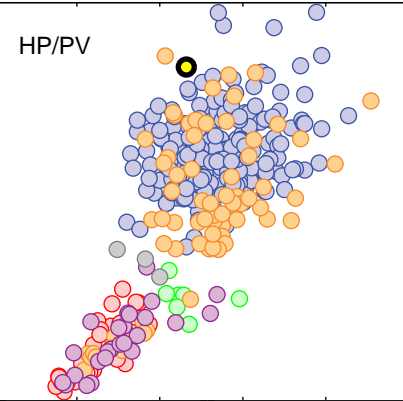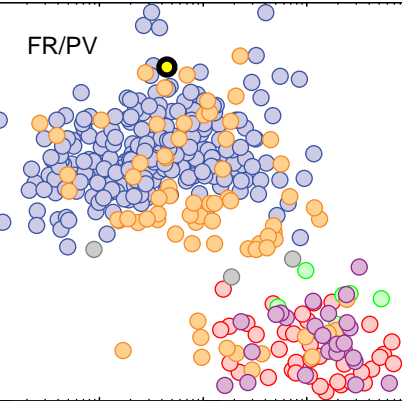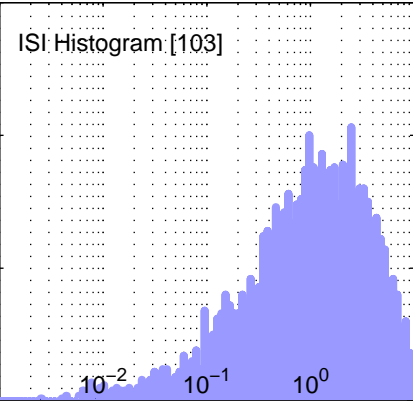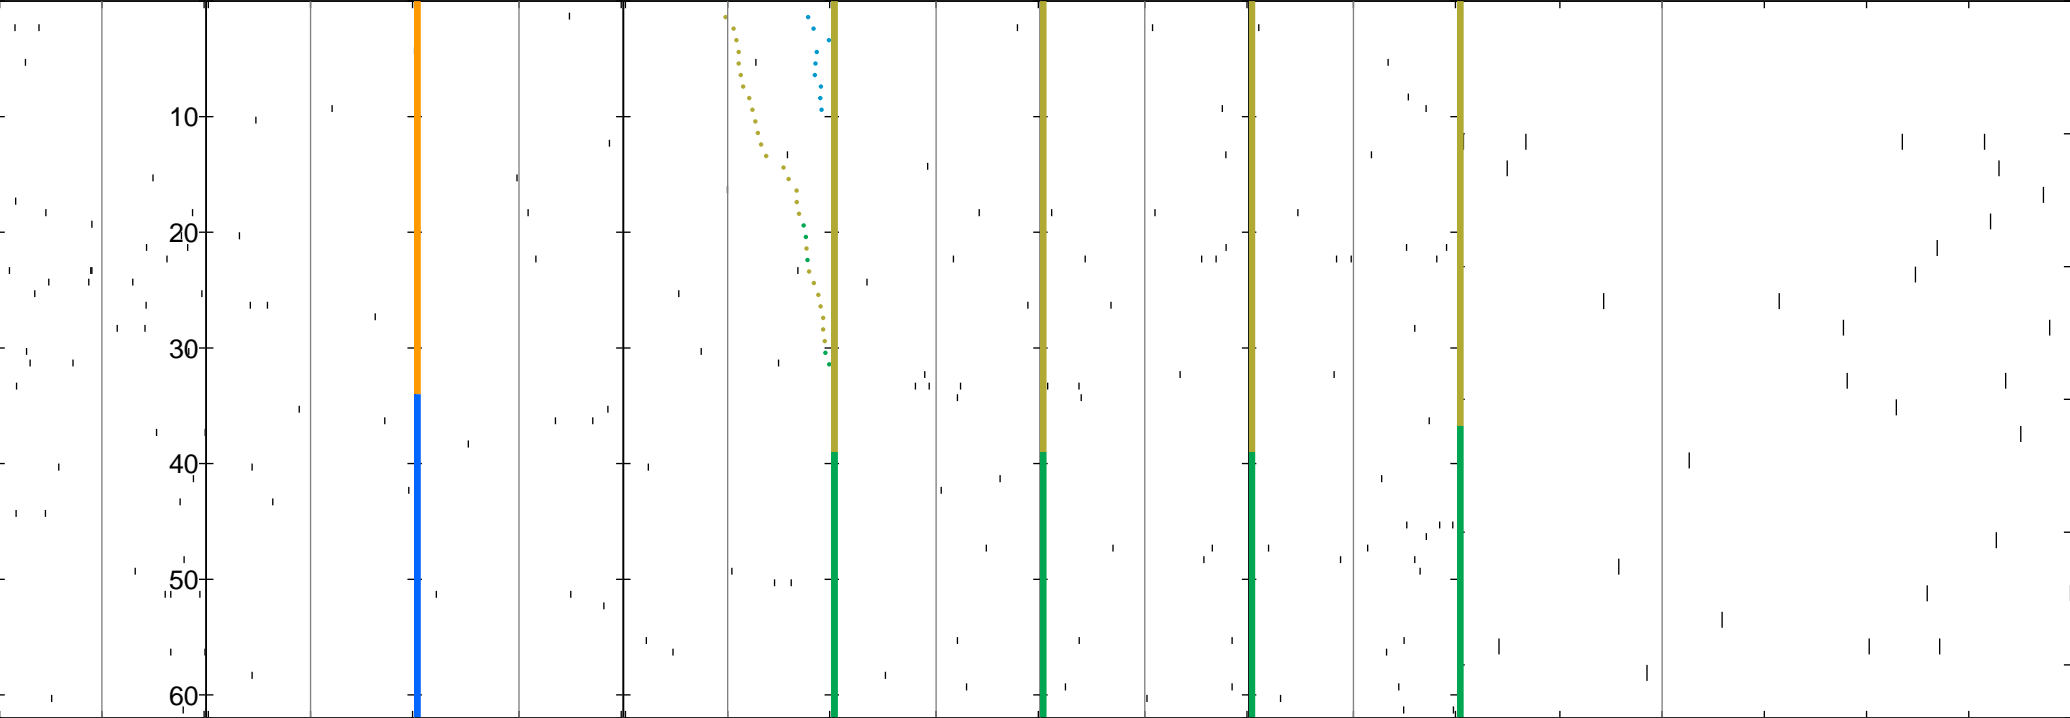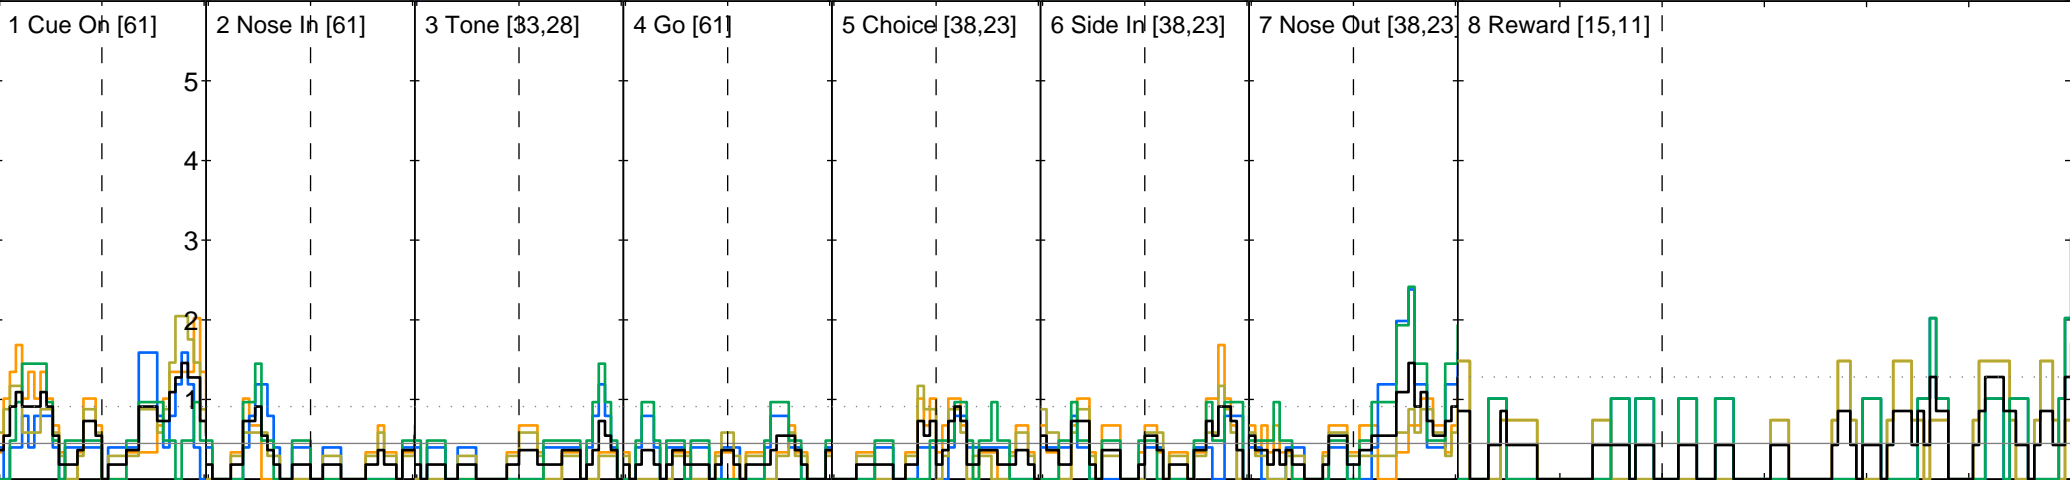

**Cell: C0420070314T06a**

AP: 2 ML: 1.8 DV: 5.5  
w: 2 n: 1512  $P_{ISI>2}$ : 0.94  
1/2pw: 272 $\mu$ s p->v: 856 $\mu$ s  
 $\beta_T$ : NaN  $\beta_D$ : NaN  
 $\beta_P$ : NaN SI: NaN  
Session FR: 0.204 Hz  
Pk Ev: None  
Pk FR: --

MSN

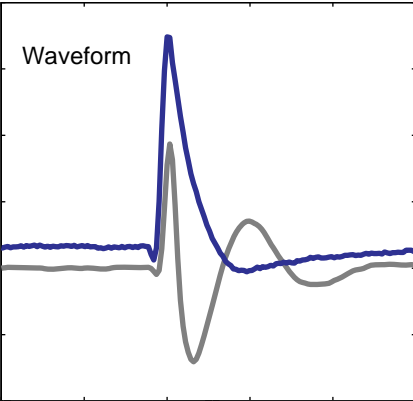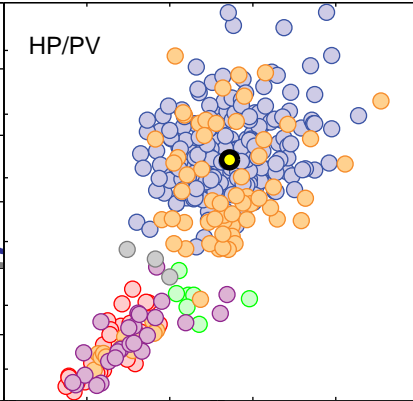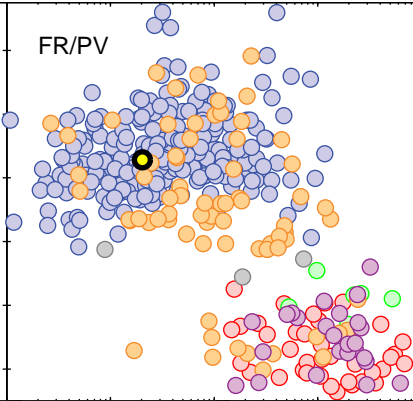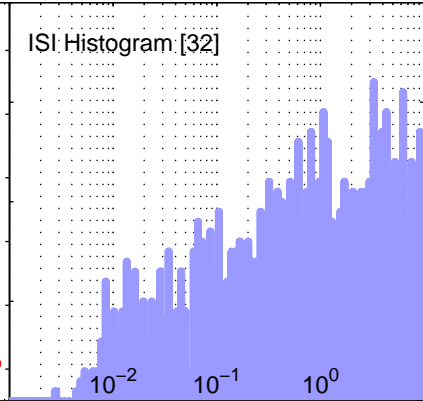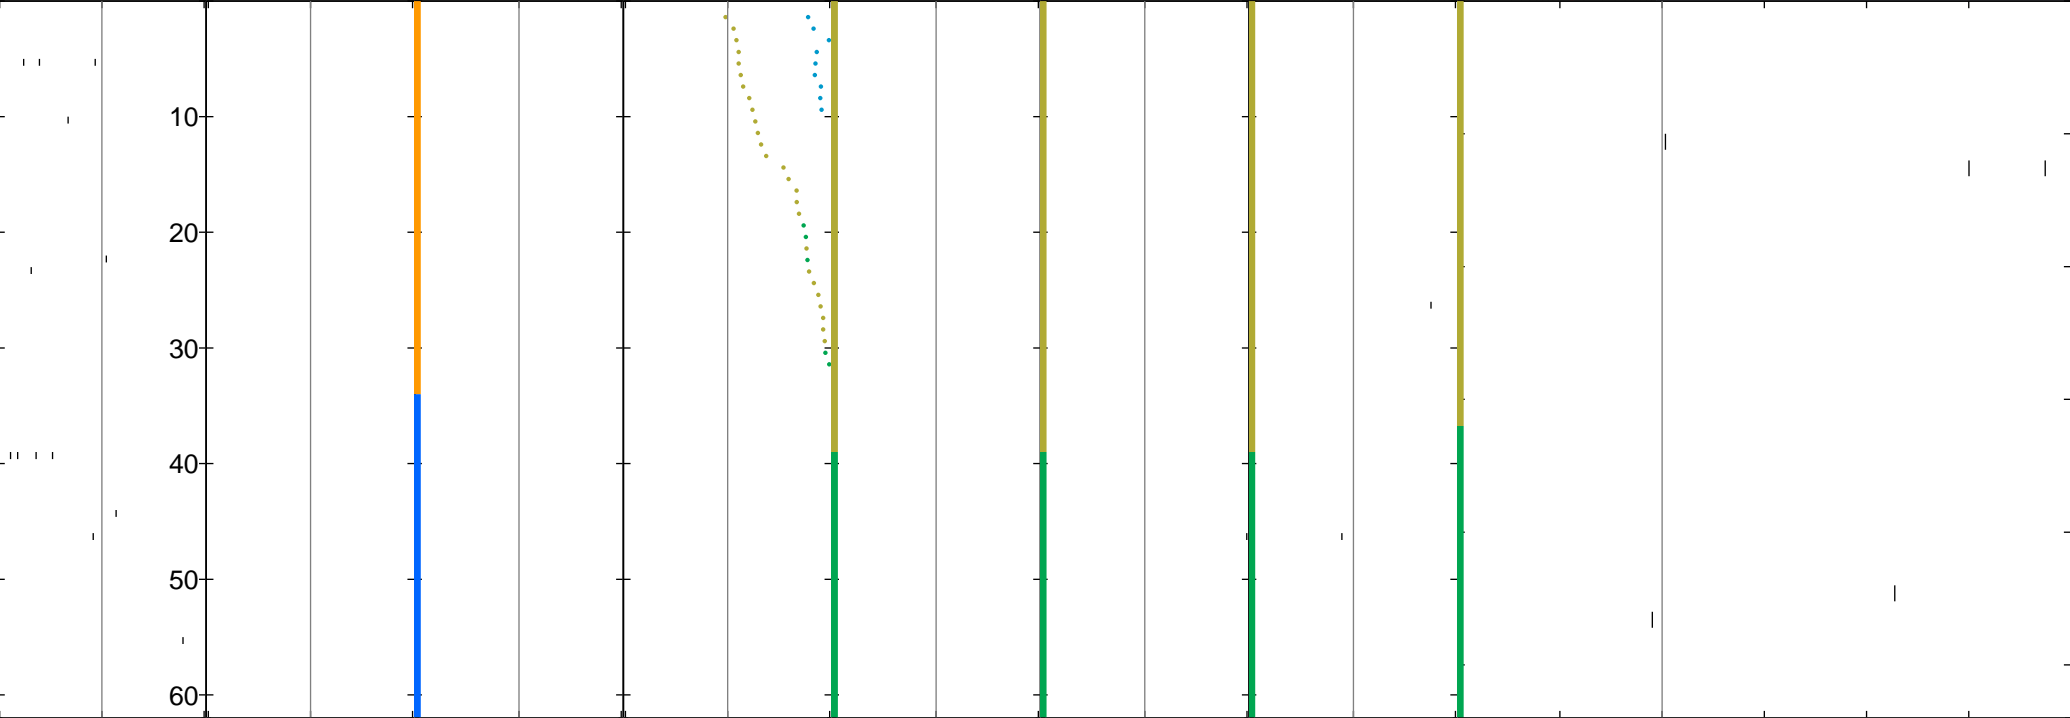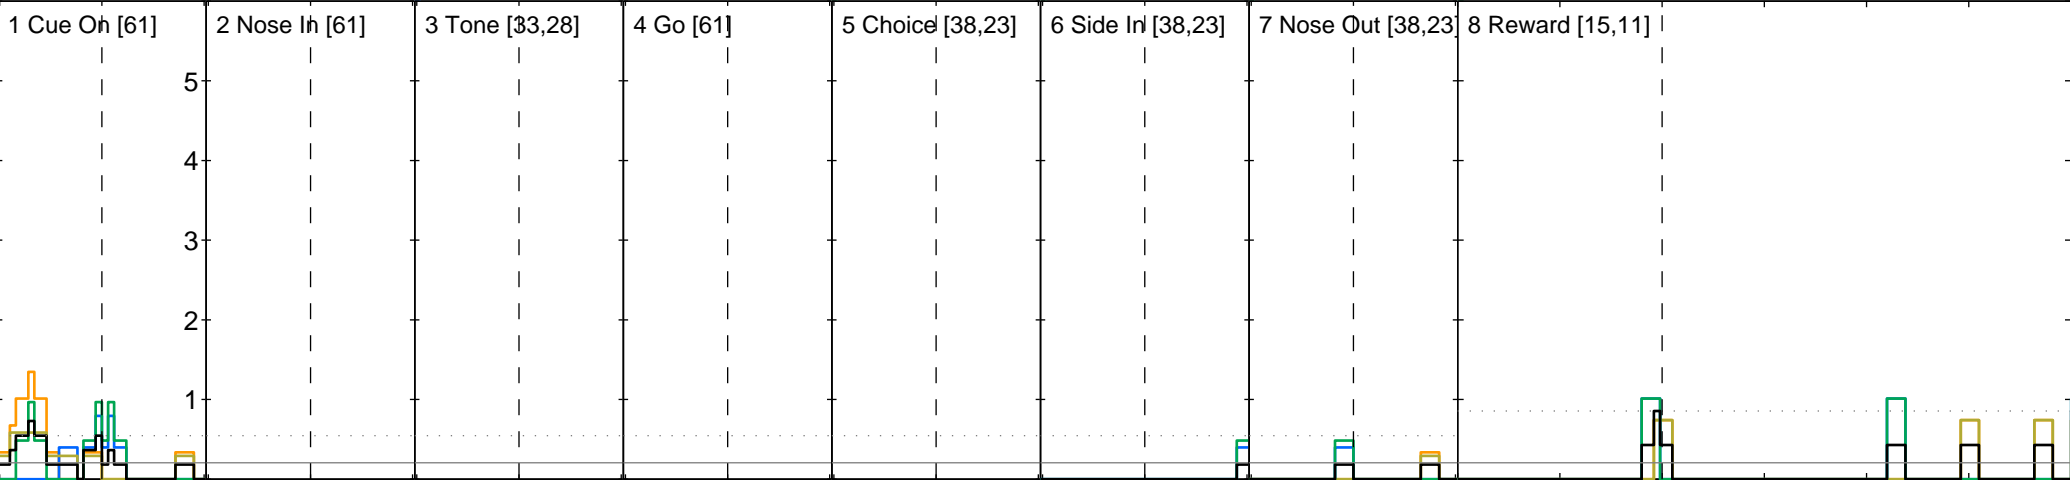

**Cell: C0420070314T06c**

AP: 2 ML: 1.8 DV: 5.5  
w: 4 n: 9641  $P_{ISI>2}$ : 0.78  
1/2pw: 286 $\mu$ s p->v: 1027 $\mu$ s  
 $\beta_T$ : NaN  $\beta_D$ : NaN  
 $\beta_P$ : NaN SI: NaN  
Session FR: 1.33 Hz  
Pk Ev: None  
Pk FR: --

MSN

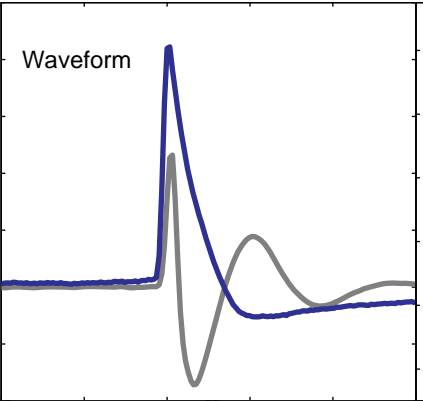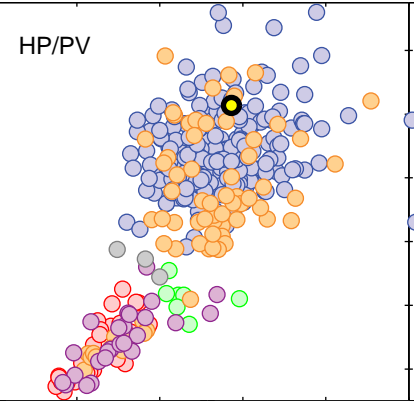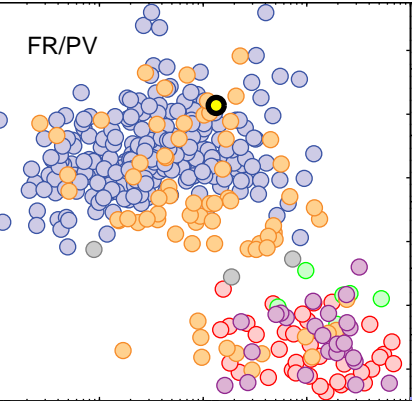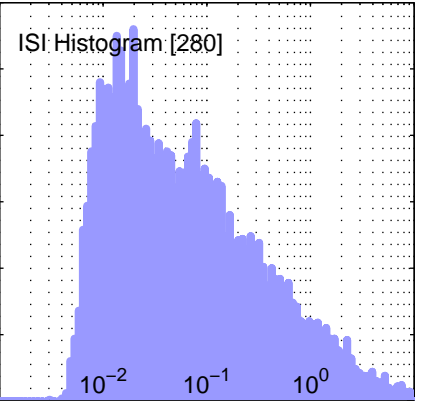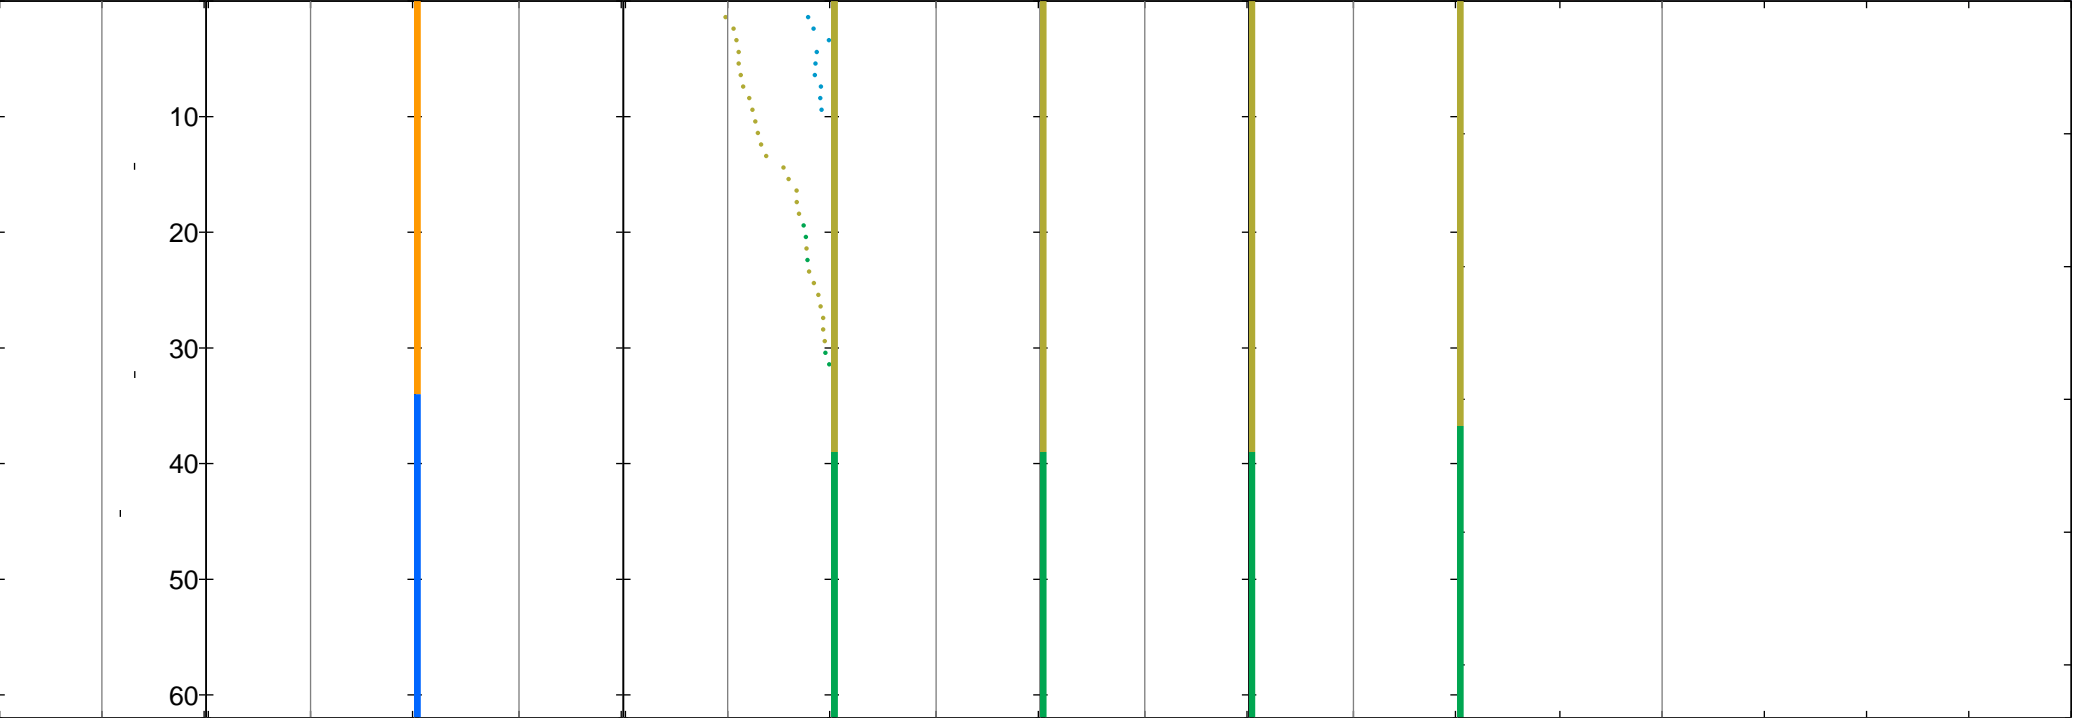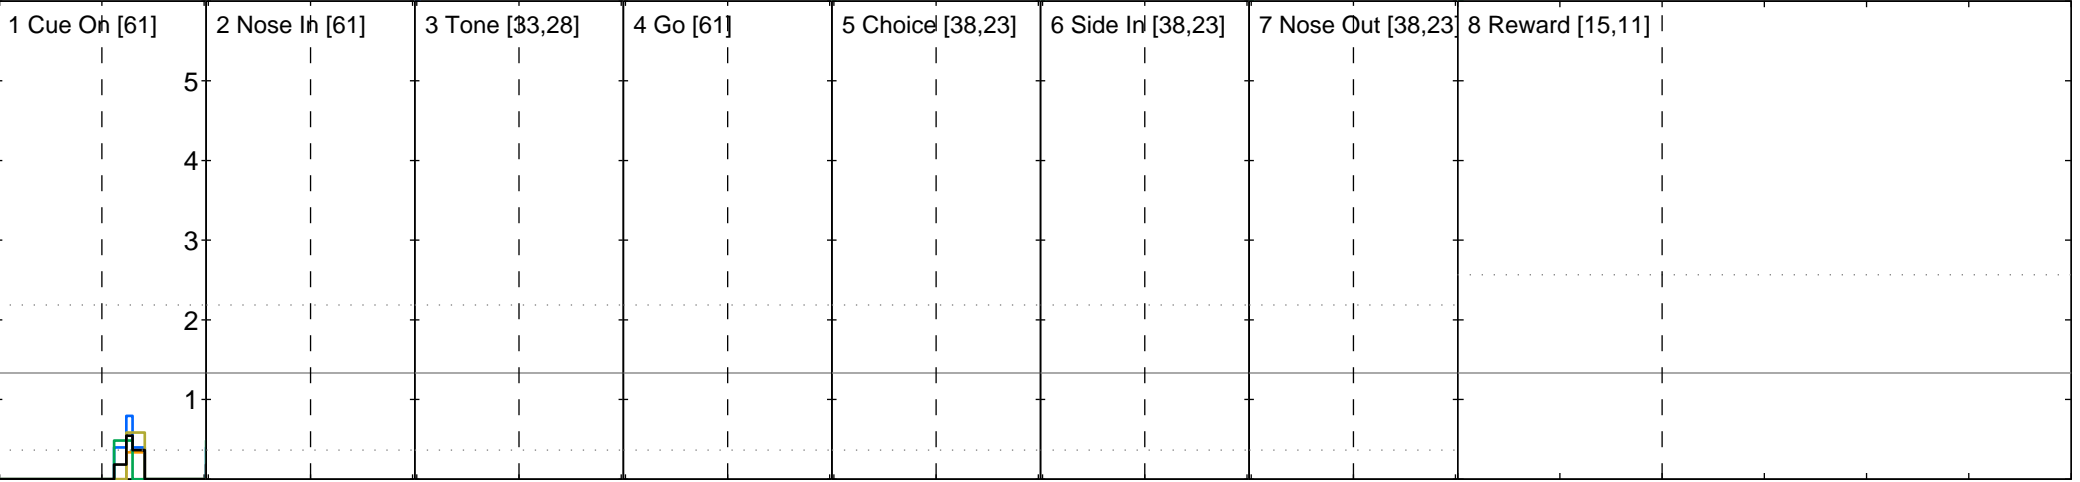

**Cell: C0420070314T06d**

AP: 2 ML: 1.8 DV: 5.5  
w: 3 n: 2507  $P_{ISI>2}$ : 0.89  
1/2pw: 262 $\mu$ s p->v: 850 $\mu$ s  
 $\beta_T$ : NaN  $\beta_D$ : NaN  
 $\beta_P$ : NaN SI: NaN  
Session FR: 0.338 Hz  
Pk Ev: None  
Pk FR: --

MSN

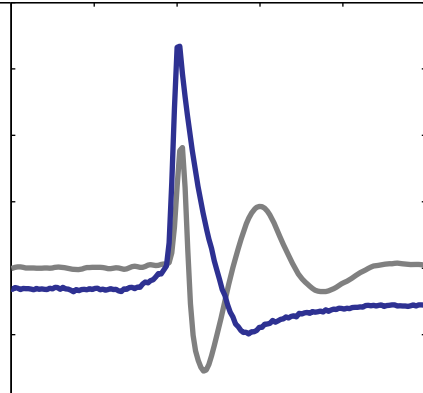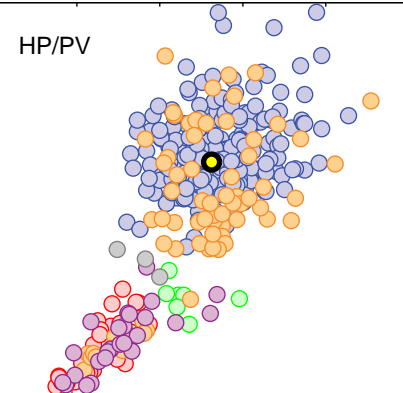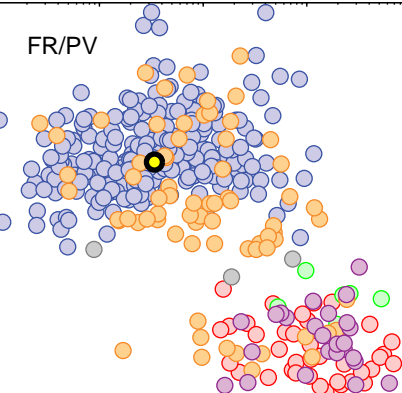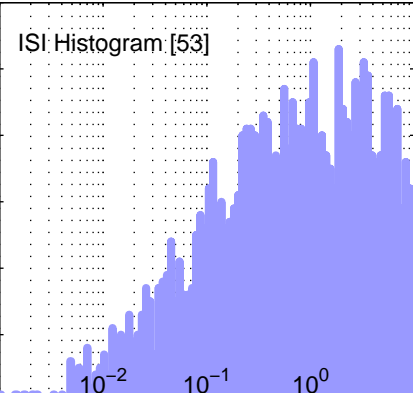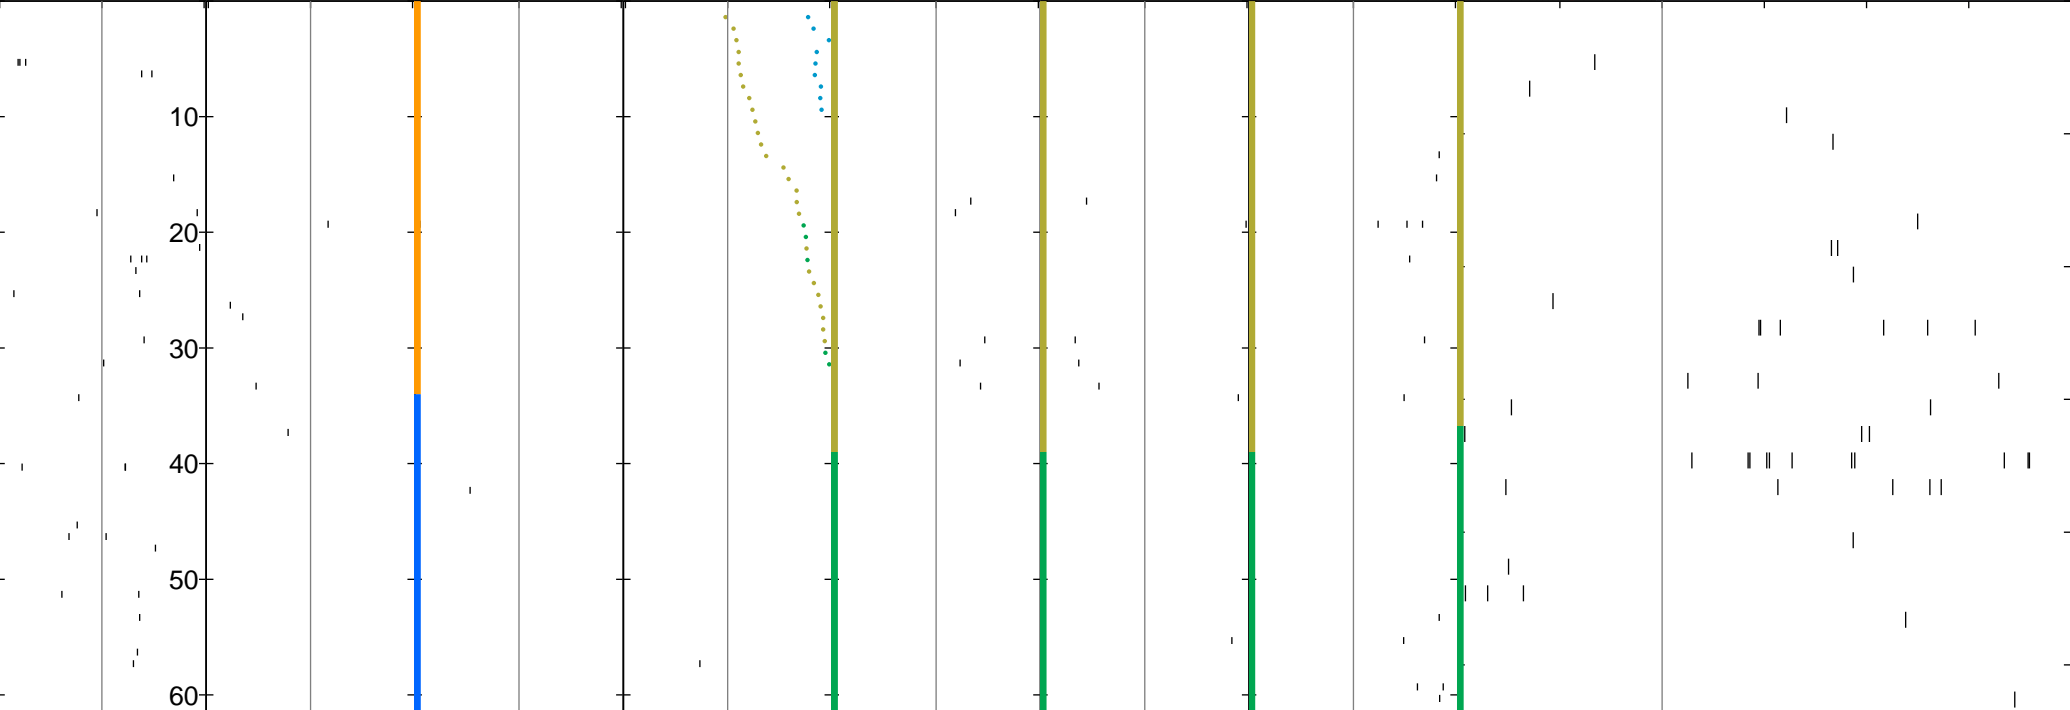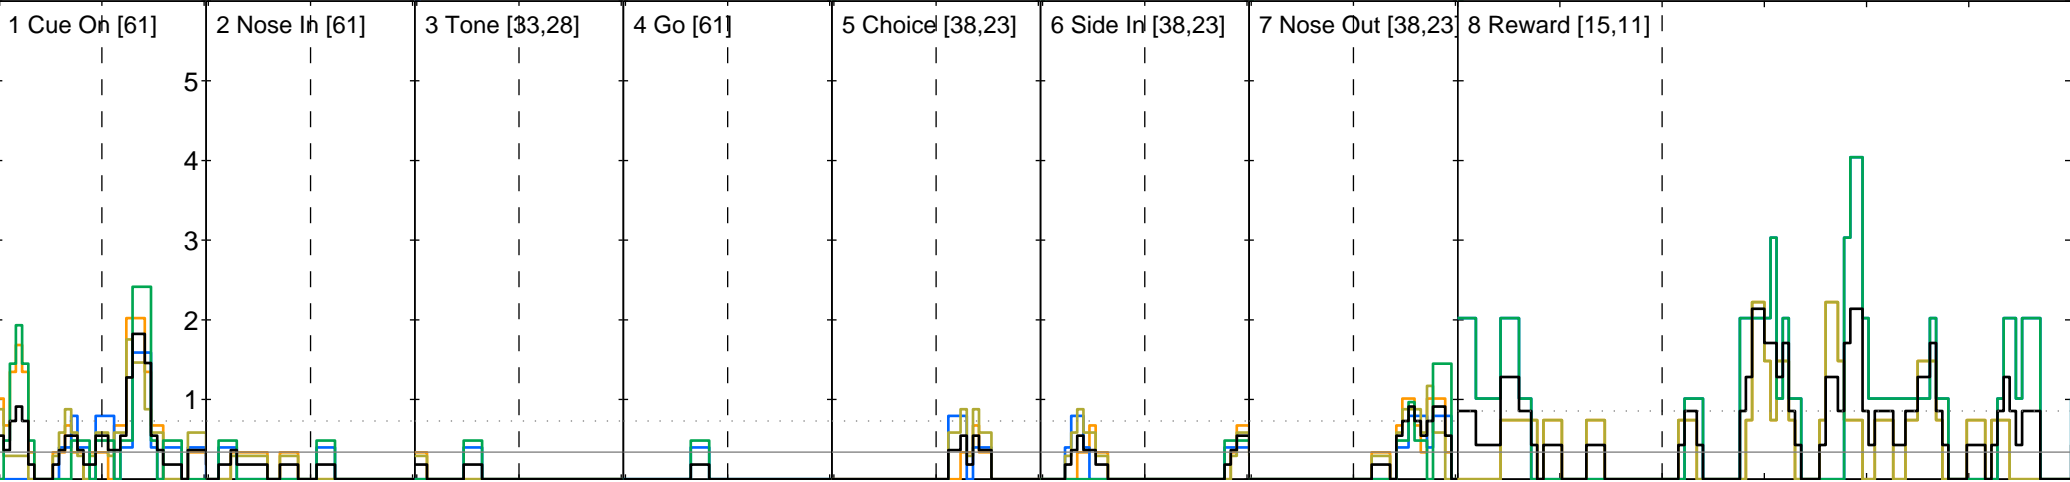

Cell: C0520070402T06a

AP: 1.9 ML: 1.5 DV: 7.8

w: 4 n: 3373  $P_{ISI>2}$ : 0.75

1/2pw: 286 $\mu$ s p $\rightarrow$ v: 896 $\mu$ s

$\beta_T$ : 2.6  $\beta_D$ : 2.3

$\beta_P$ : -3.8 SI: NaN

Session FR: 0.741 Hz

Pk Ev: None

Pk FR: --

MSN

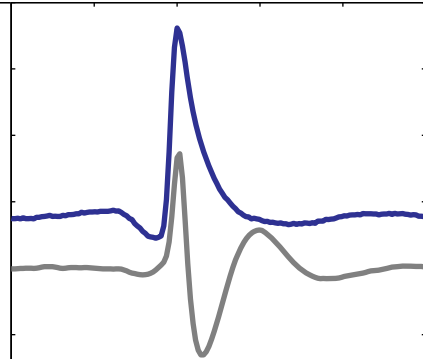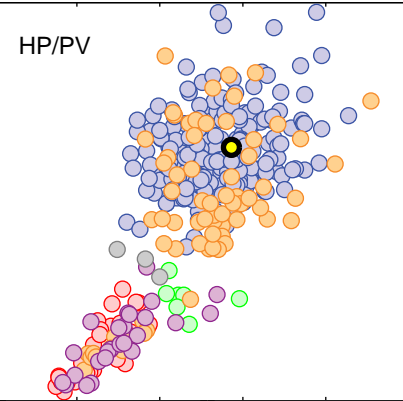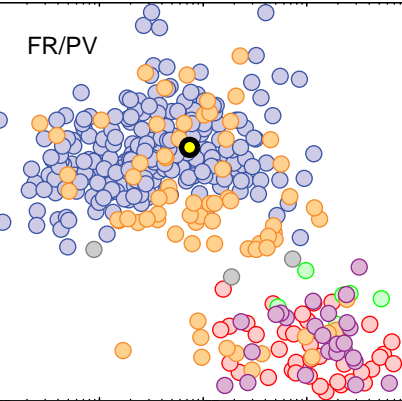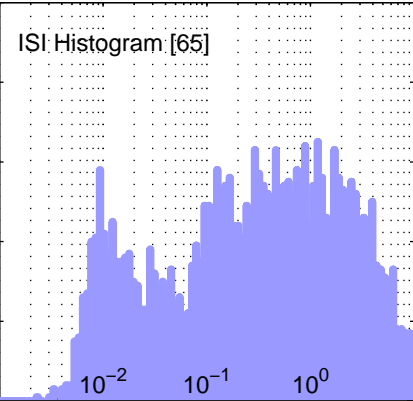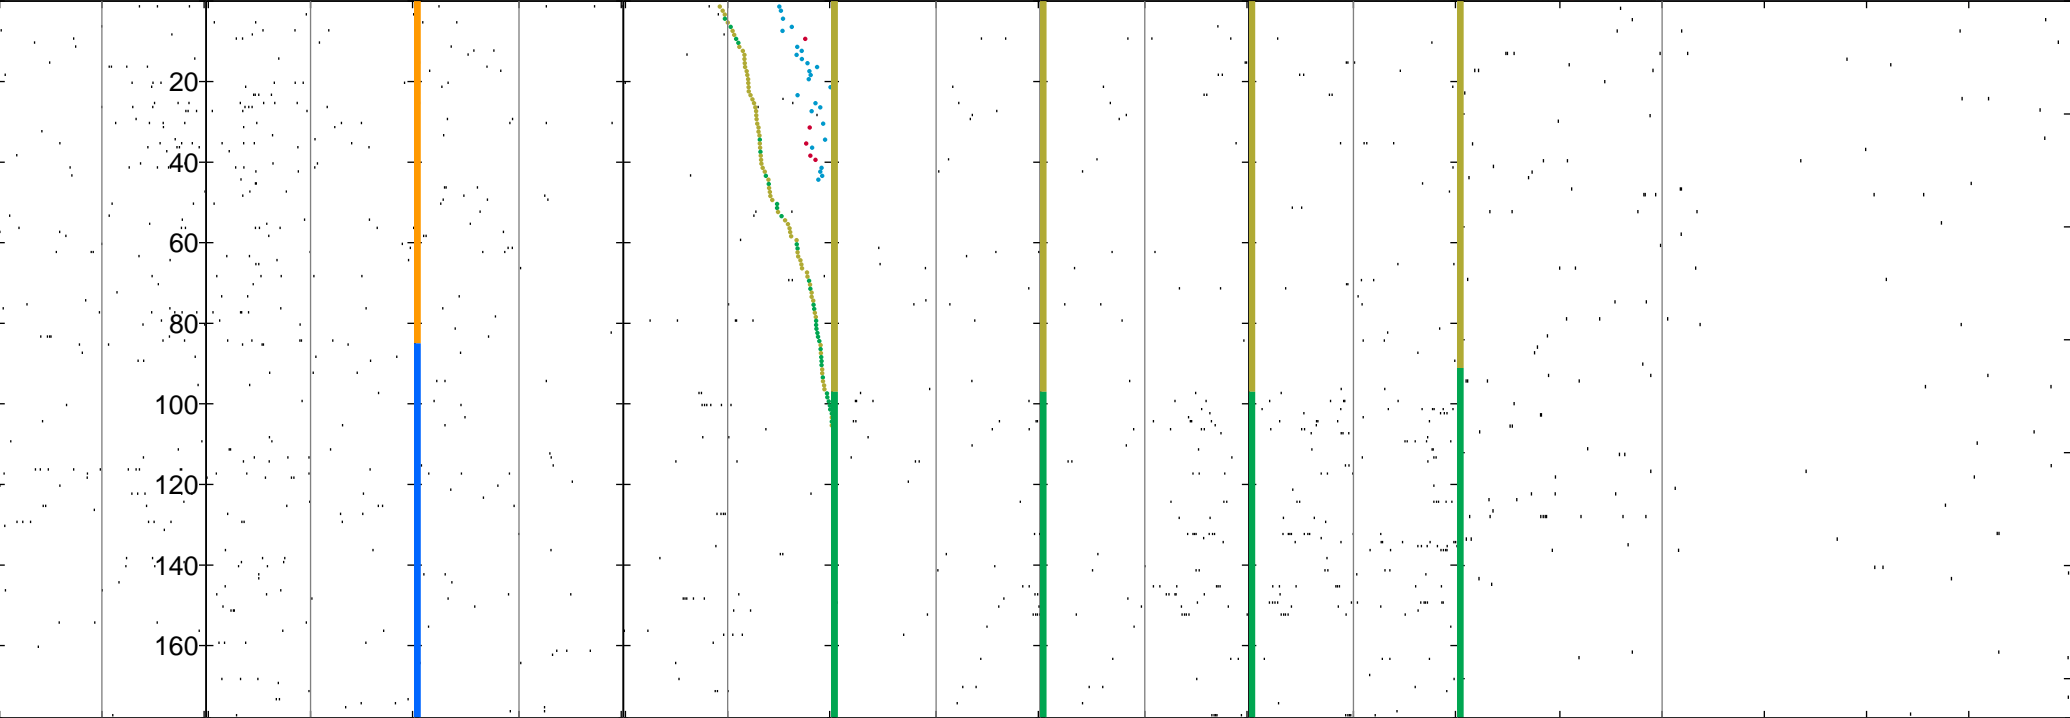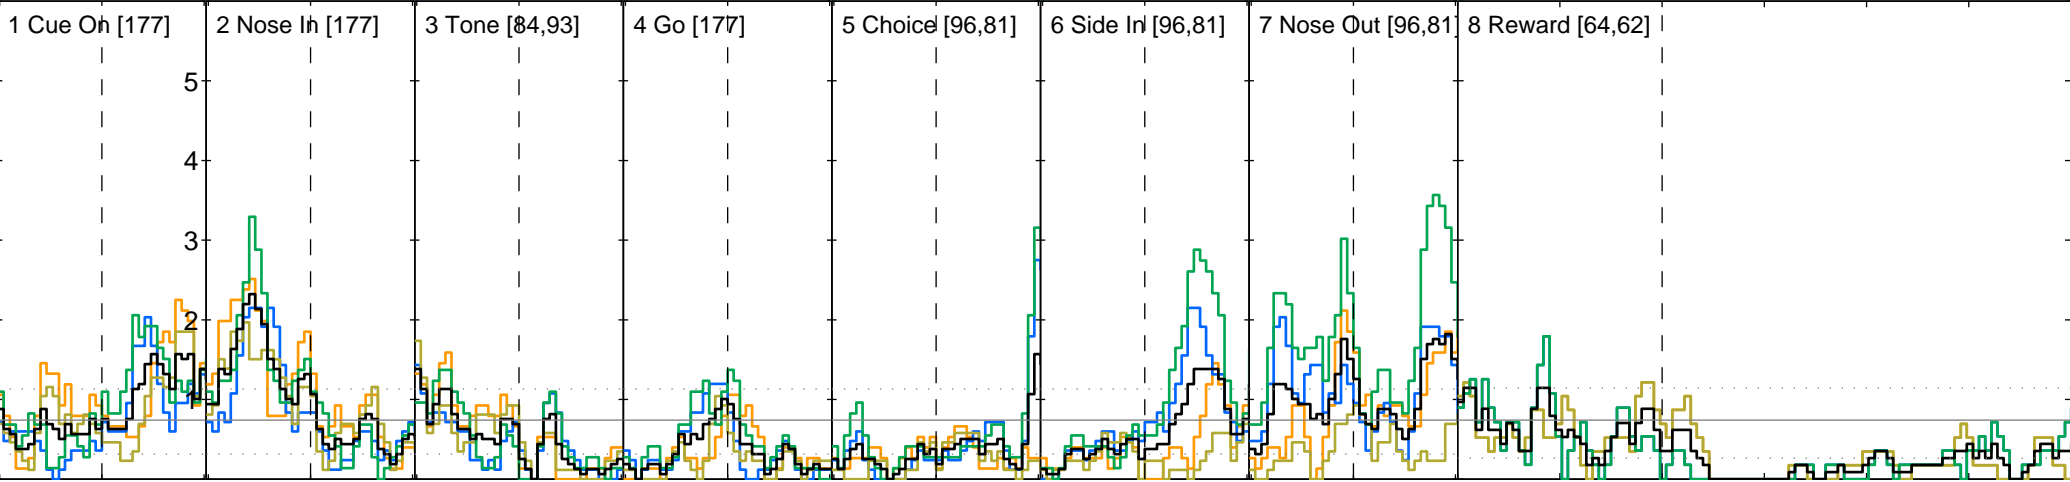

Cell: C0520070405R02a

AP: 0.24 ML: 4 DV: 6.5  
w: 1 n: 3180  $P_{ISI>2}$ : 0.85  
1/2pw: 253 $\mu$ s p->v: 802 $\mu$ s  
 $\beta_T$ : NaN  $\beta_D$ : NaN  
 $\beta_P$ : NaN SI: NaN  
Session FR: 0.723 Hz  
Pk Ev: None  
Pk FR: --

MSN

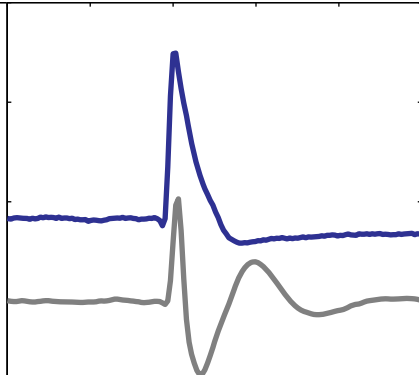

HP/PV

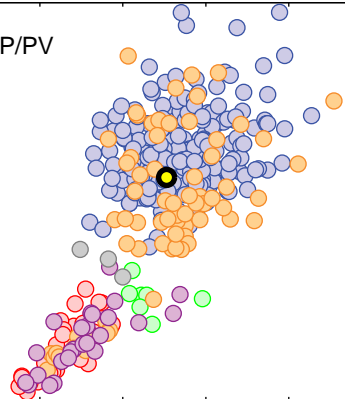

FR/PV

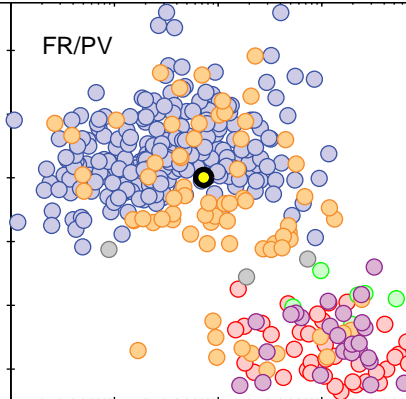

ISI Histogram [78]

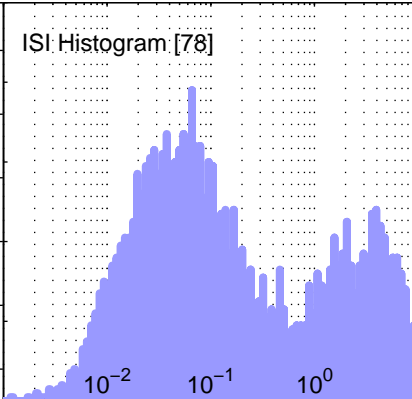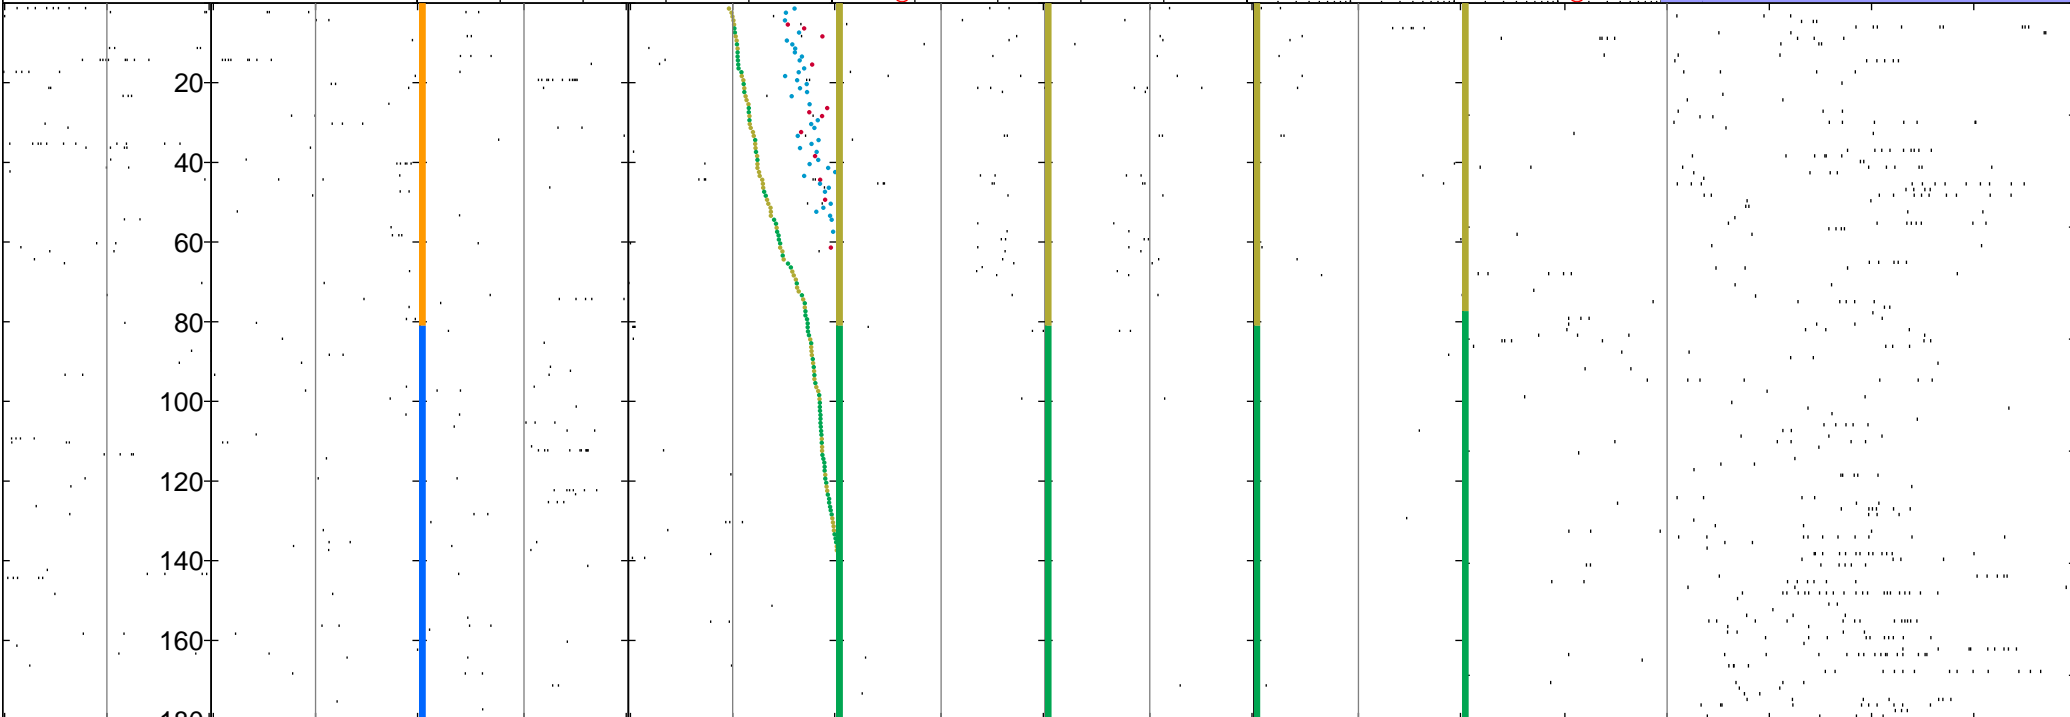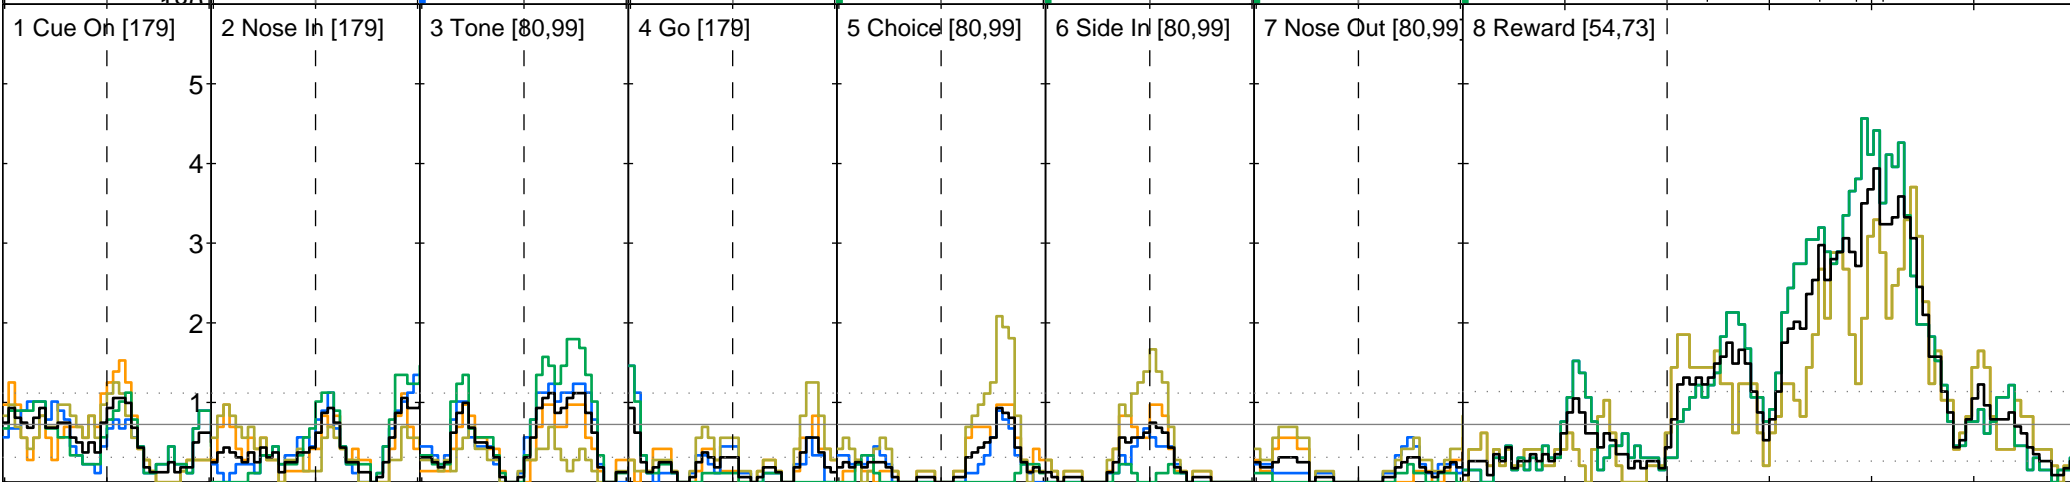



**Cell: C0520070405R02b**

AP: 0.24 ML: 4 DV: 6.5

w: 1 n: 185  $P_{ISI>2}$ : 11/2pw: 176 $\mu$ s p->v: 638 $\mu$ s $\beta_T$ : NaN  $\beta_D$ : NaN $\beta_P$ : NaN SI: NaN

Session FR: 0.0426 Hz

Pk Ev: None

Pk FR: --

MSN

Waveform

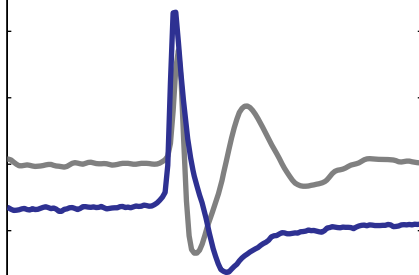

HP/PV

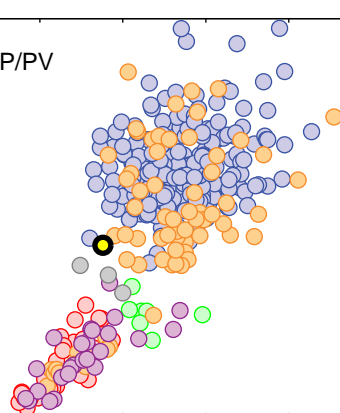

FR/PV

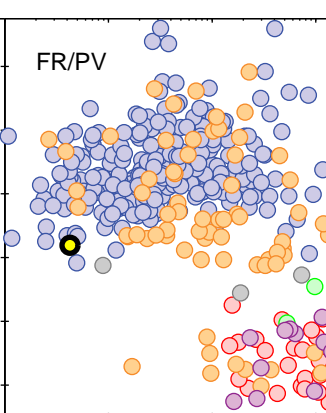

ISI Histogram [6]

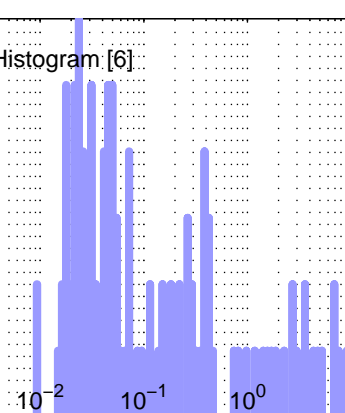

20

40

60

80

100

120

140

160

180

1 Cue On [179]

2 Nose In [179]

3 Tone [80,99]

4 Go [179]

5 Choice [80,99]

6 Side In [80,99]

7 Nose Out [80,99]

8 Reward [54,73]

5

4

3

2

1

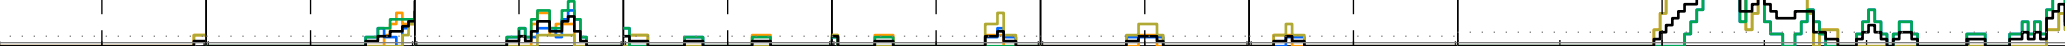

**Cell: C0520070405T04a**

AP: 3 ML: 1.5 DV: 6.8  
w: 2 n: 479  $P_{ISI>2}$ : 0.98  
1/2pw: 230 $\mu$ s p->v: 738 $\mu$ s  
 $\beta_T$ : NaN  $\beta_D$ : NaN  
 $\beta_P$ : NaN SI: NaN  
Session FR: 0.11 Hz  
Pk Ev: None  
Pk FR: --

MSN

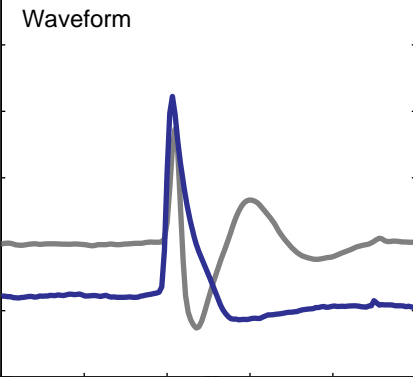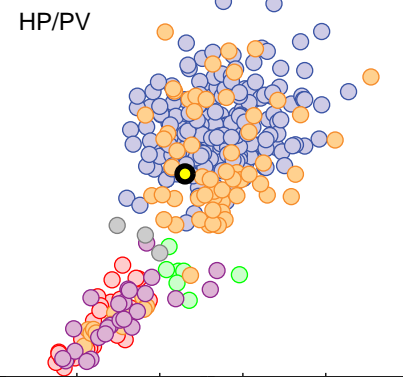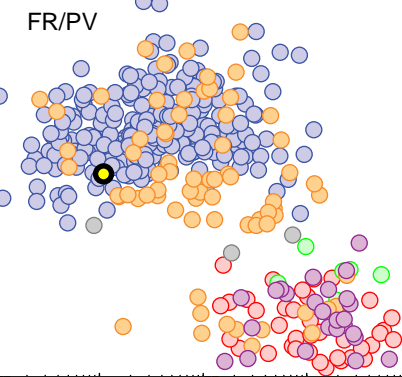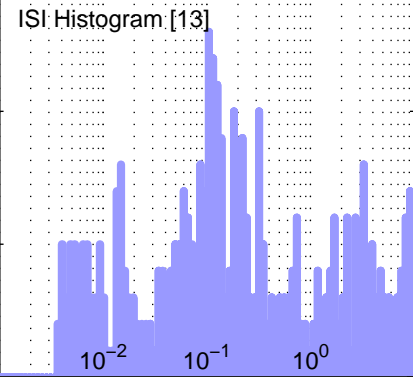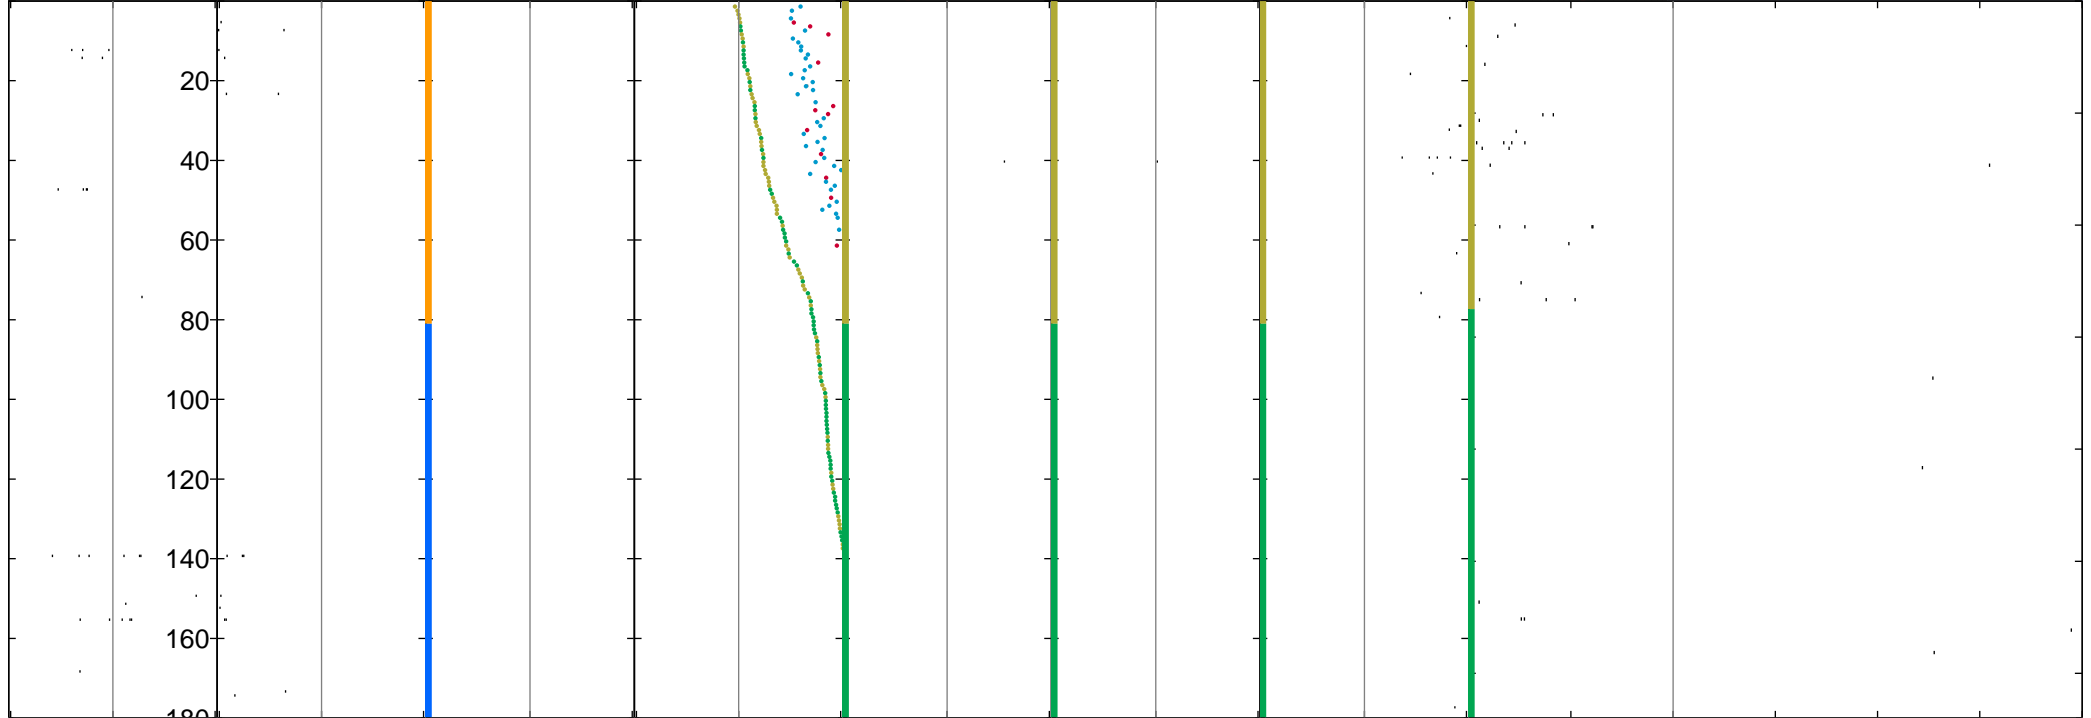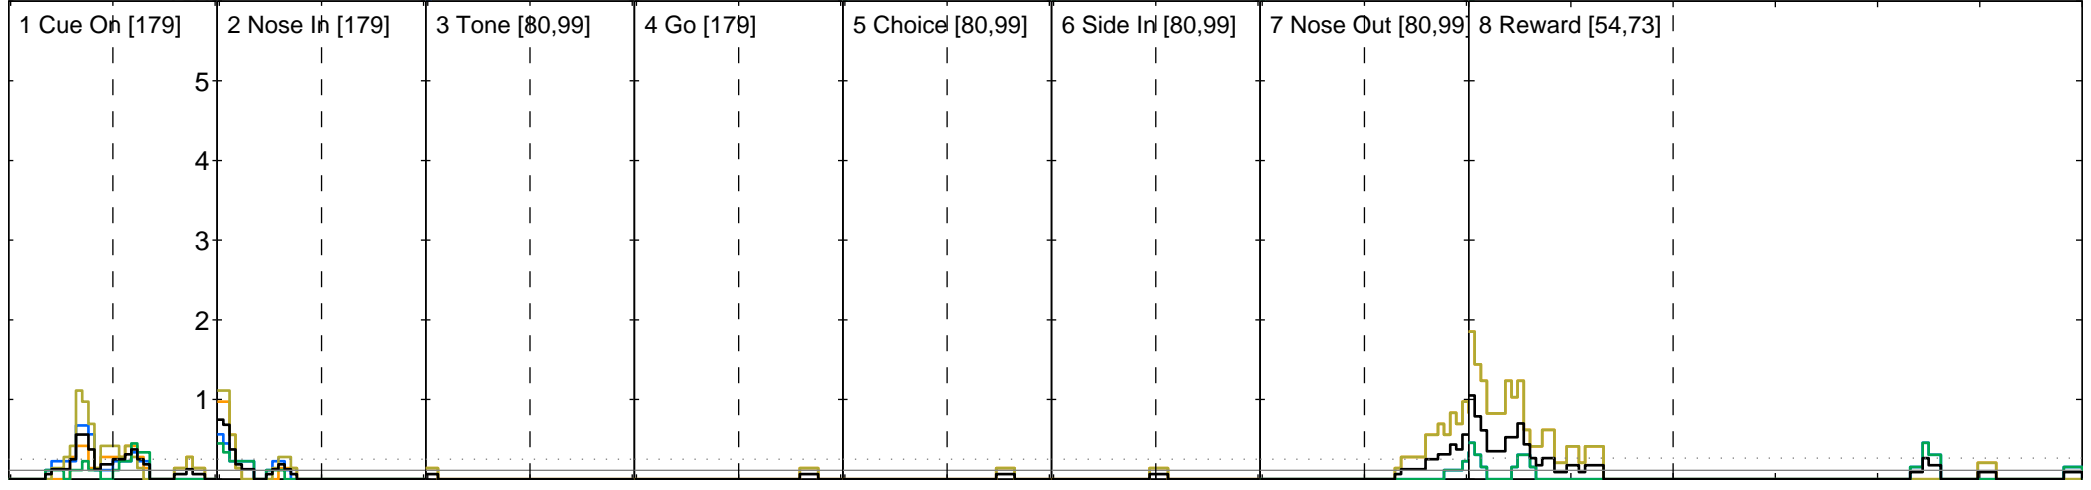

**Cell: C0520070405T04b**

AP: 3 ML: 1.5 DV: 6.8  
w: 4 n: 103  $P_{ISI>2}$ : 0.99  
1/2pw: 306 $\mu$ s p->v: 864 $\mu$ s  
 $\beta_T$ : NaN  $\beta_D$ : NaN  
 $\beta_P$ : NaN SI: NaN  
Session FR: 0.0341 Hz  
Pk Ev: None  
Pk FR: --

MSN

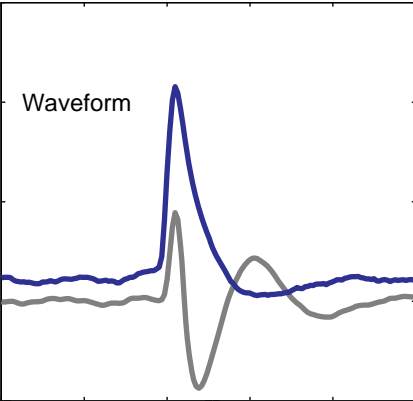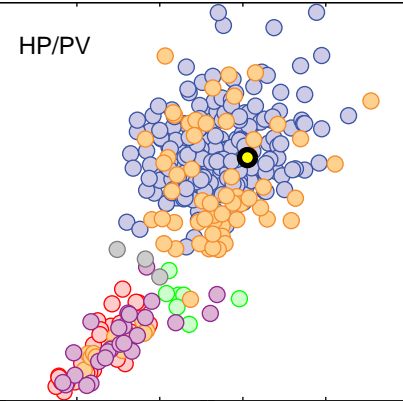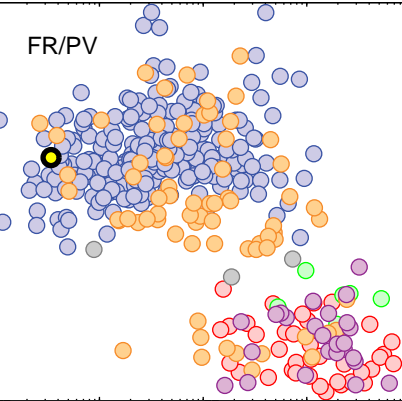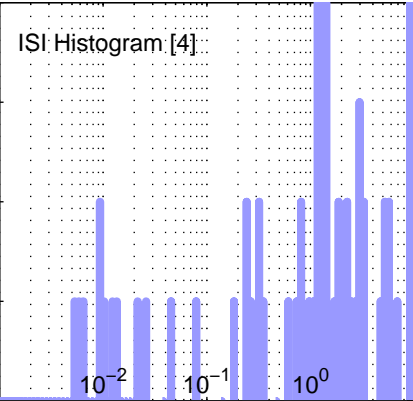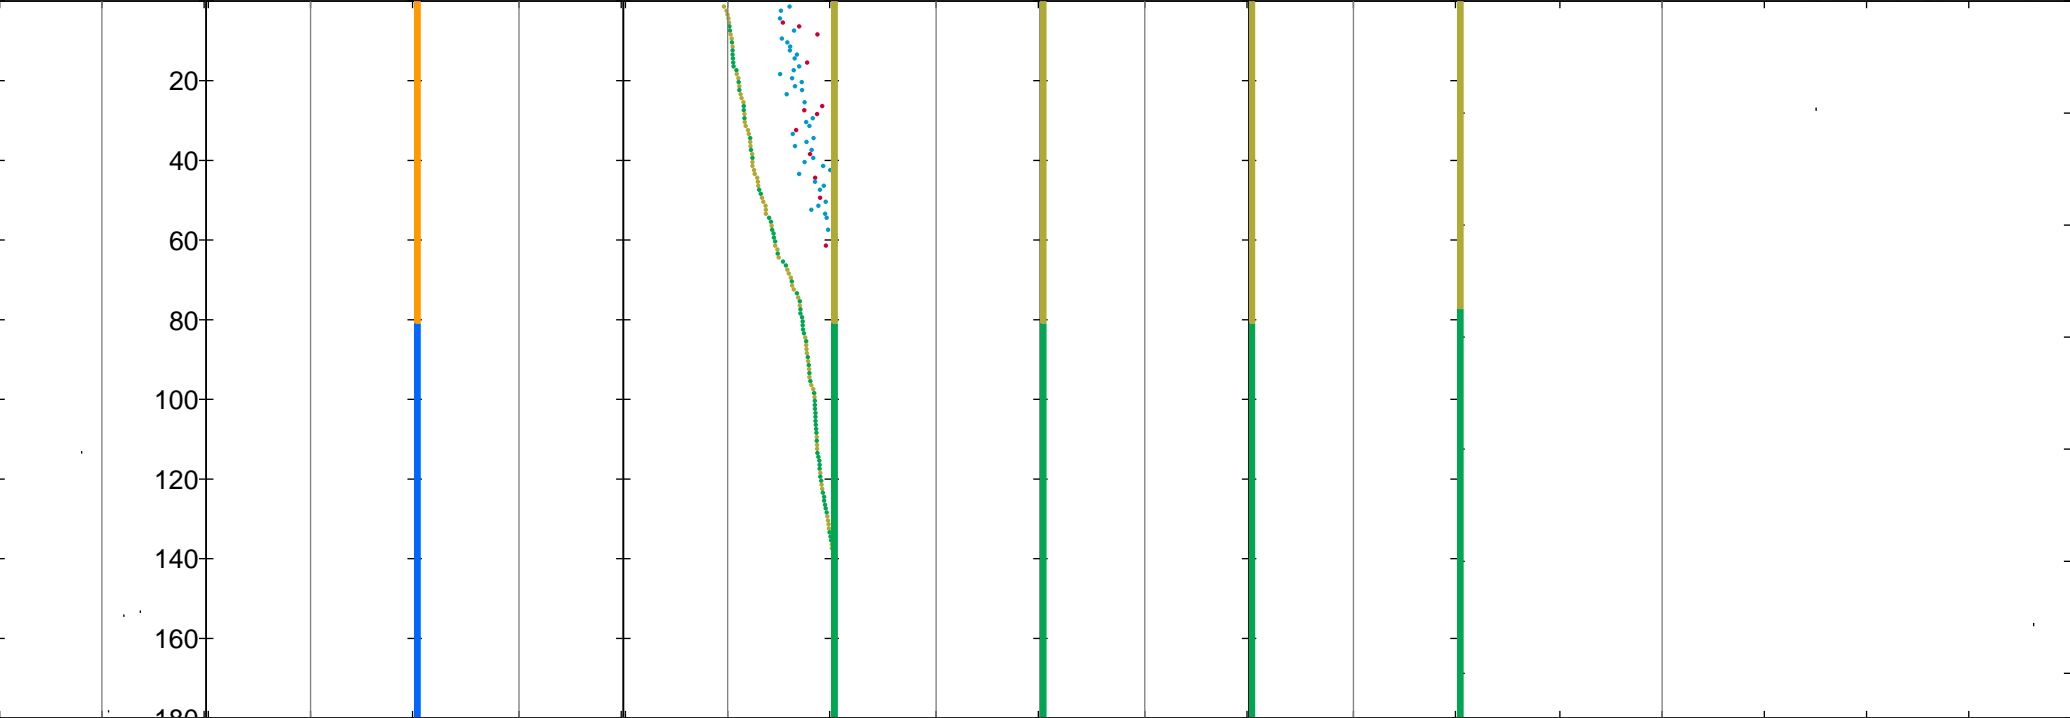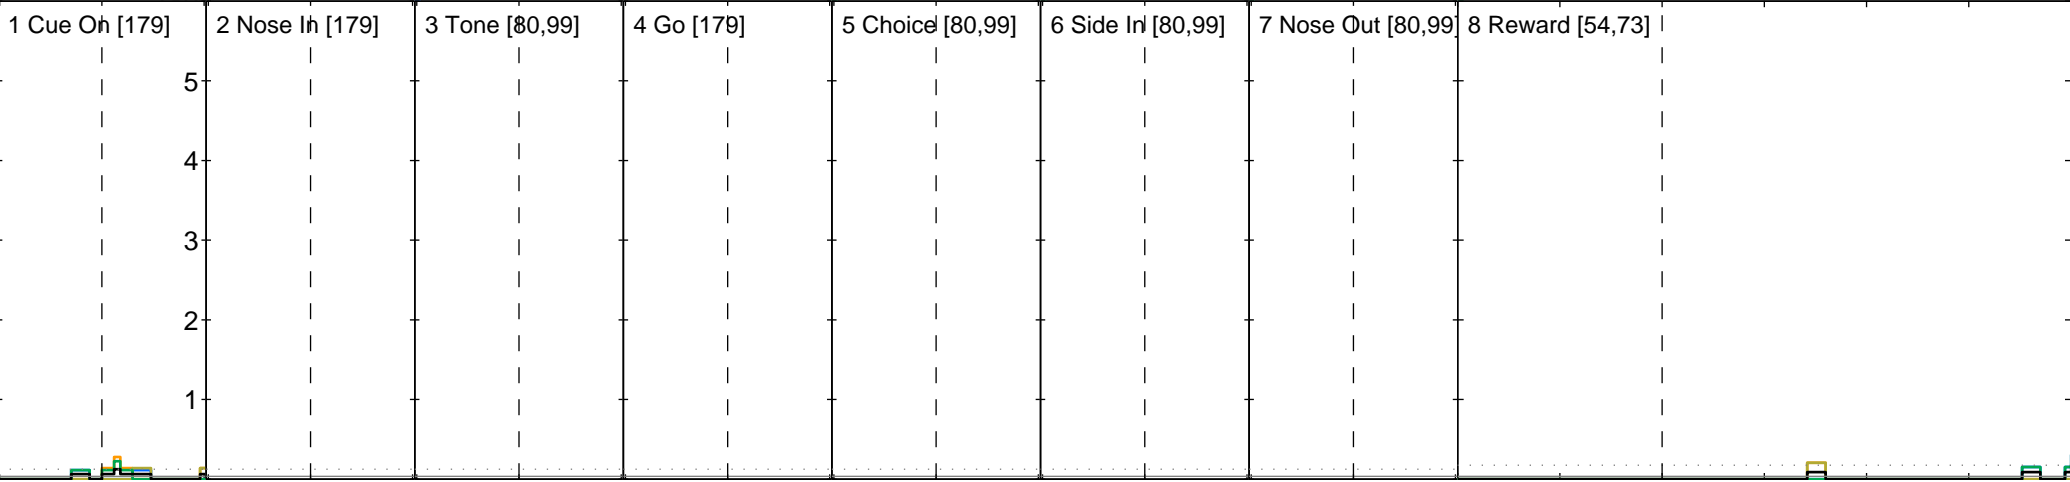

**Cell: C0520070405T05a**

AP: 2.2 ML: 1.2 DV: 7.5  
w: 2 n: 4365  $P_{ISI>2}$ : 0.62  
1/2pw: 282 $\mu$ s p $\rightarrow$ v: 819 $\mu$ s  
 $\beta_T$ : 2.6  $\beta_D$ : 4.2  
 $\beta_P$ : -3 SI: NaN  
Session FR: 0.99 Hz  
Pk Ev: None  
Pk FR: --

MSN

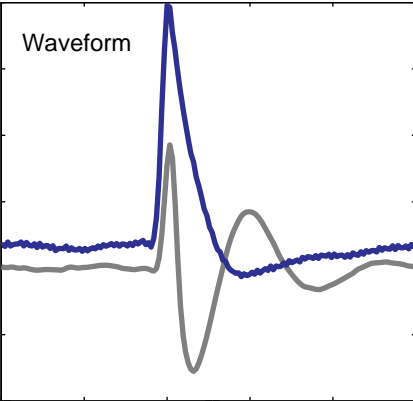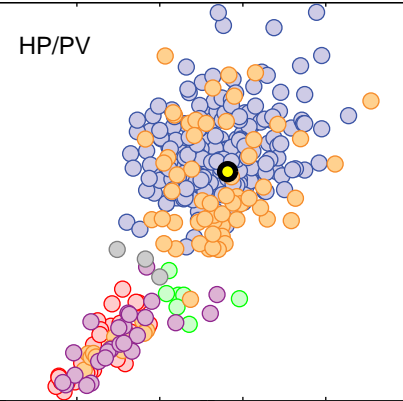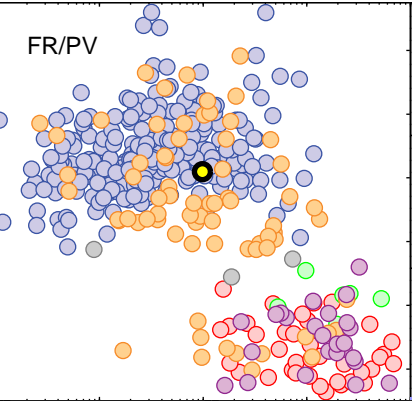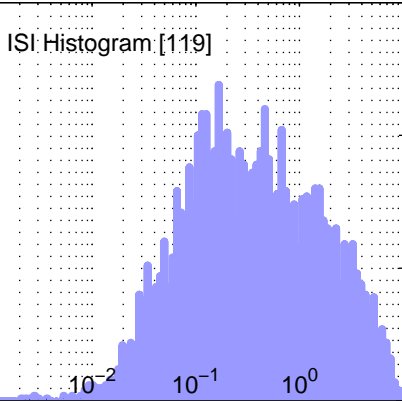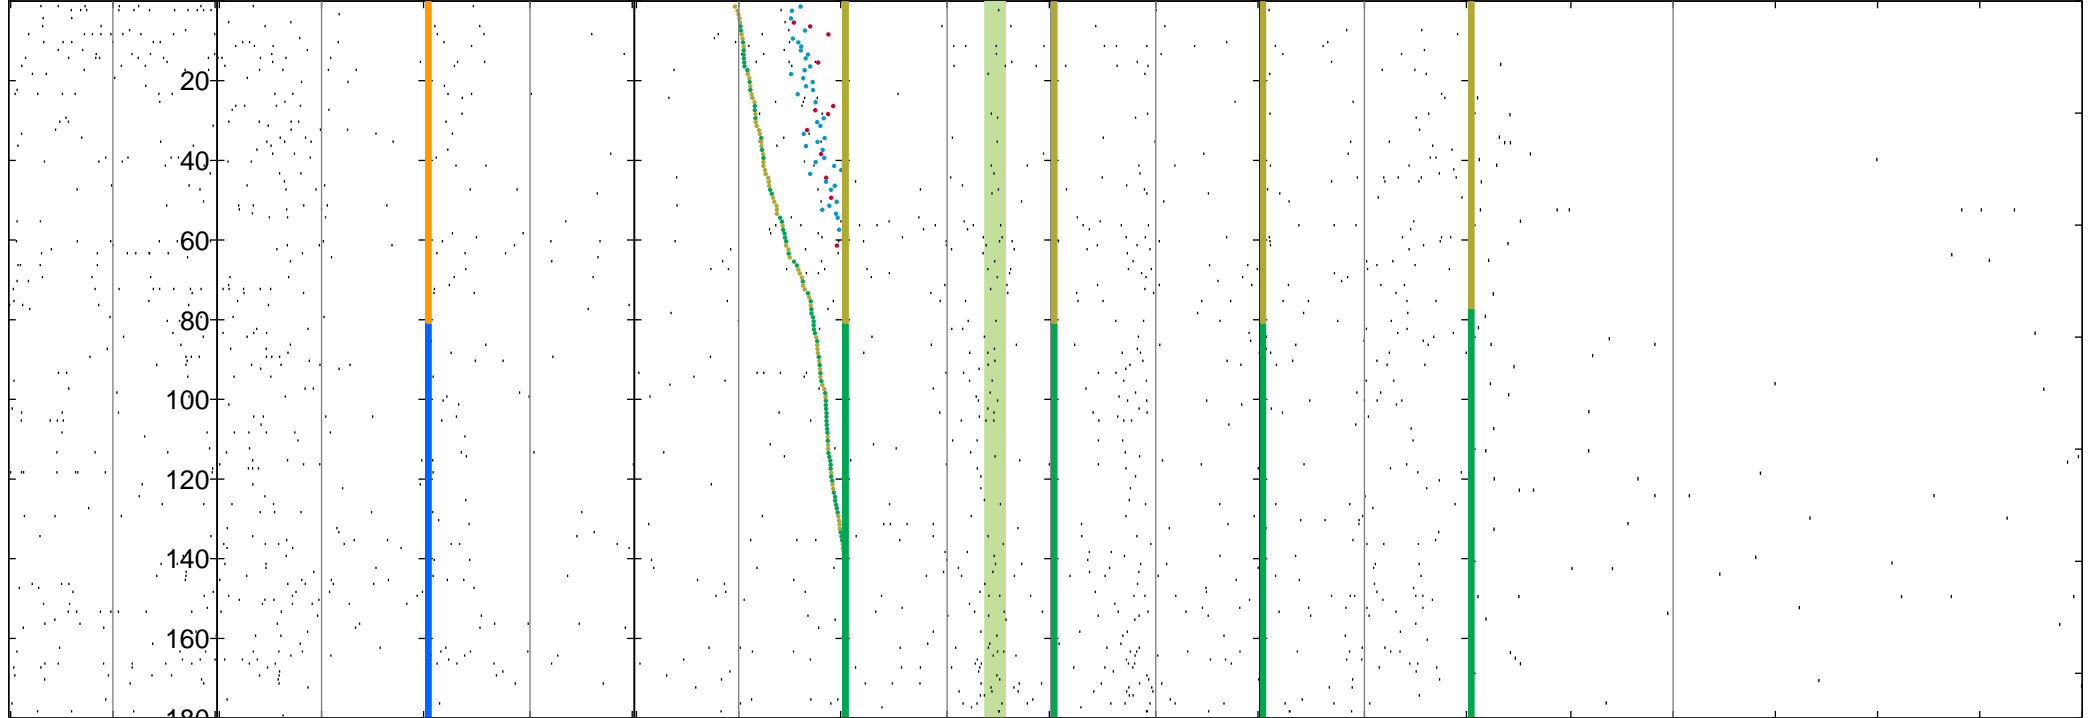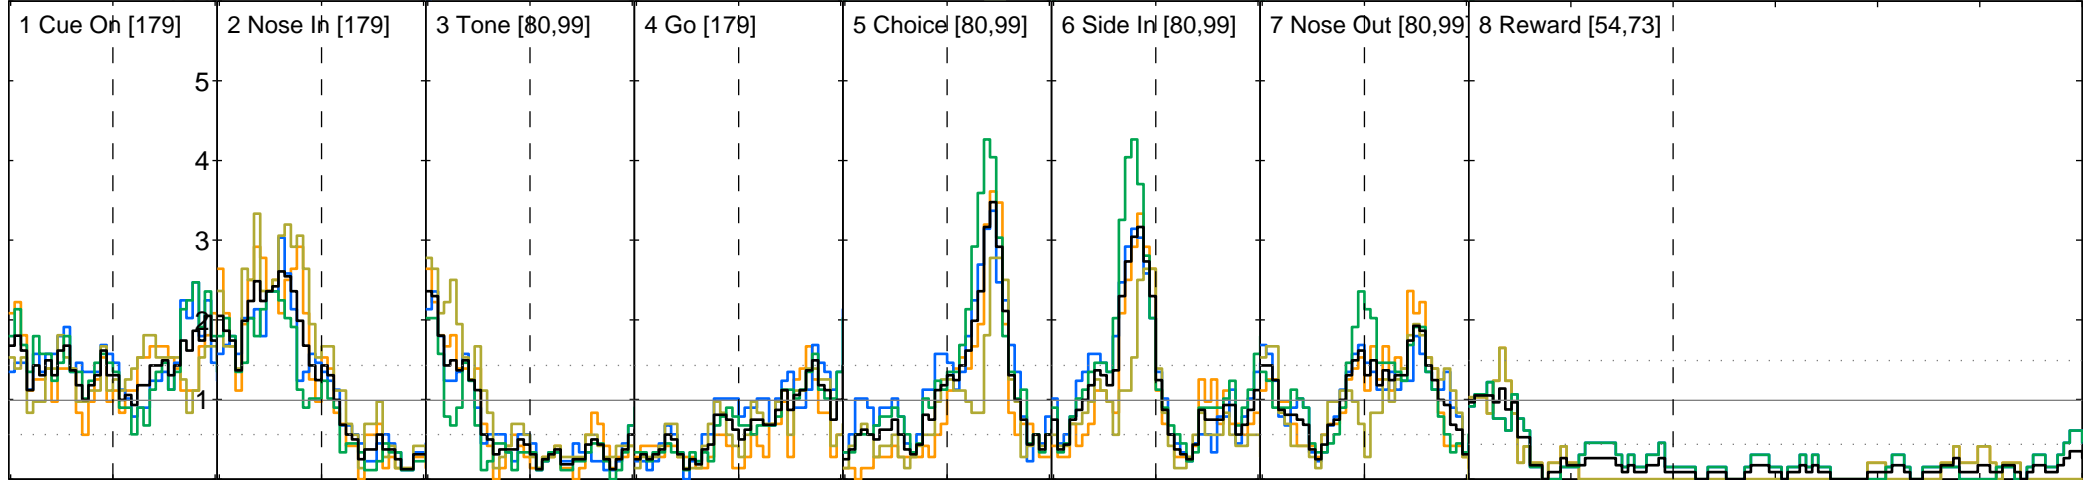

**Cell: C0520070405T05b**

AP: 2.2 ML: 1.2 DV: 7.5

w: 3 n: 920  $P_{ISI>2}$ : 0.93

1/2pw: 211 $\mu$ s p->v: 829 $\mu$ s

$\beta_T$ : NaN  $\beta_D$ : NaN

$\beta_P$ : NaN SI: NaN

Session FR: 0.209 Hz

Pk Ev: None

Pk FR: --

**MSN**

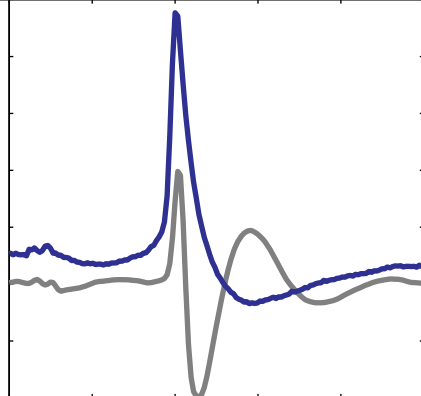

HP/PV

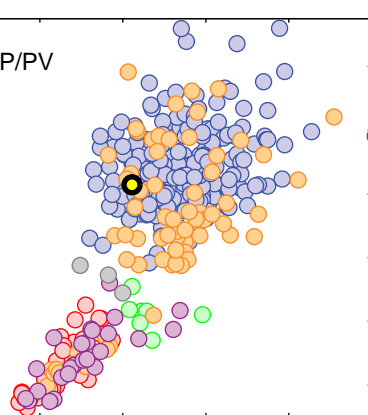

FR/PV

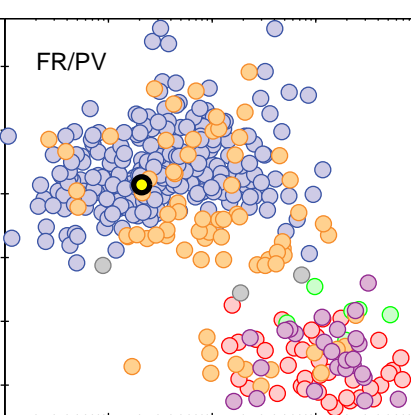

ISI Histogram [30]

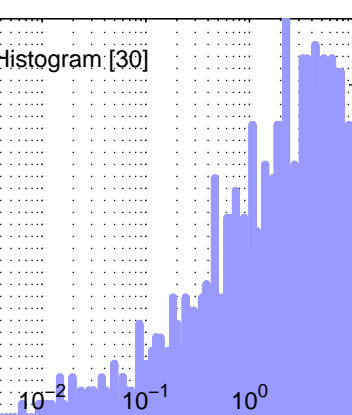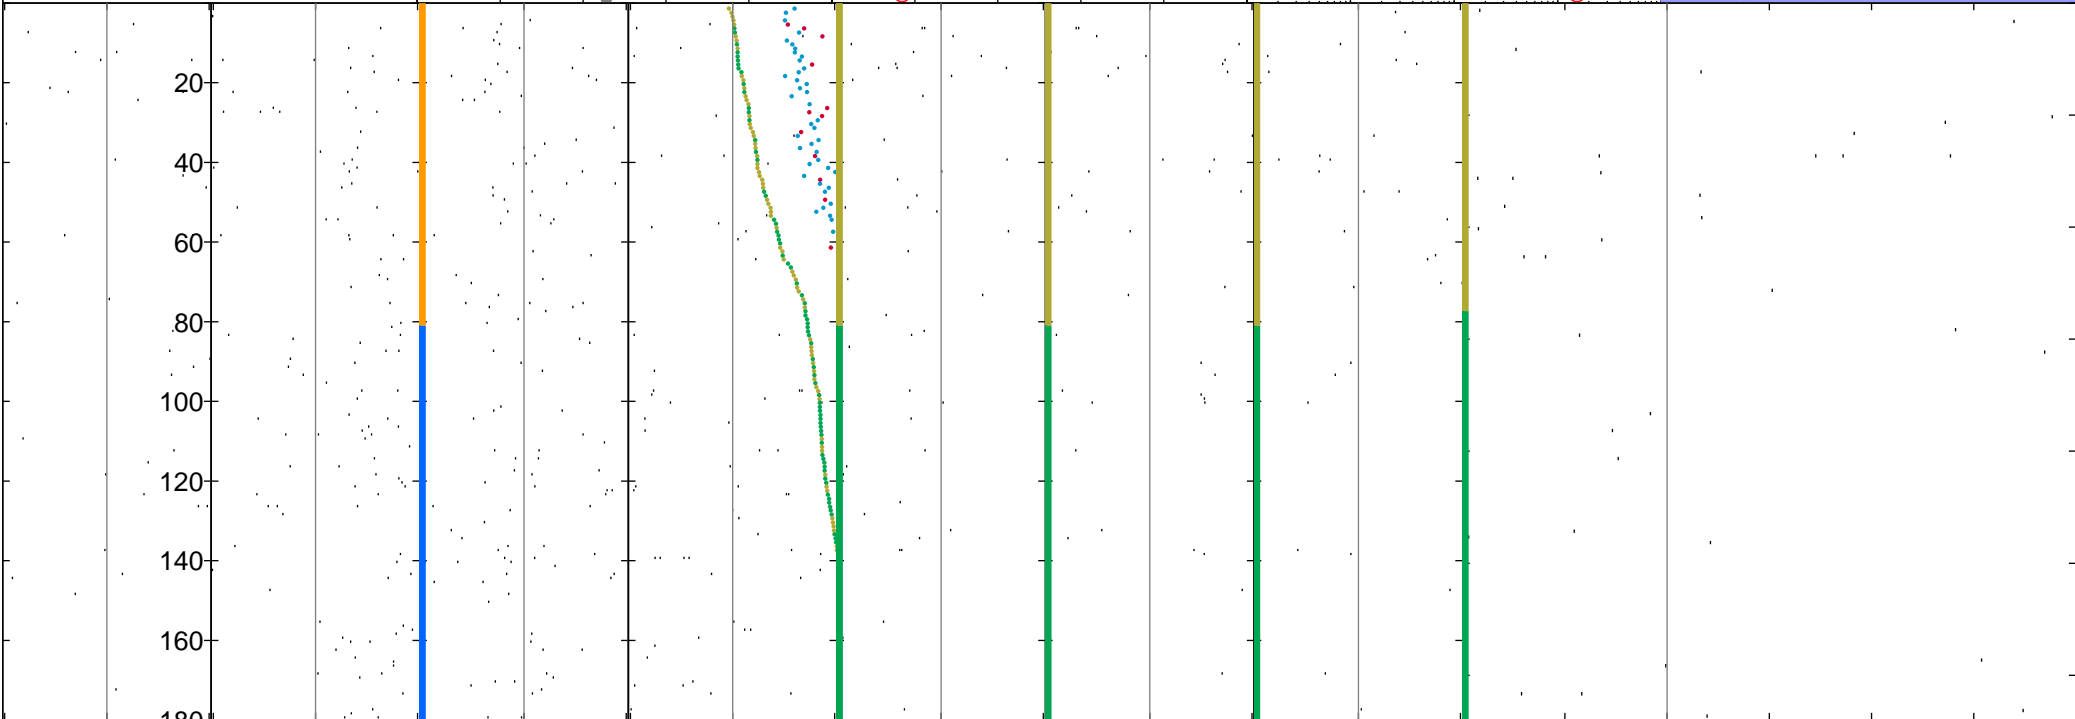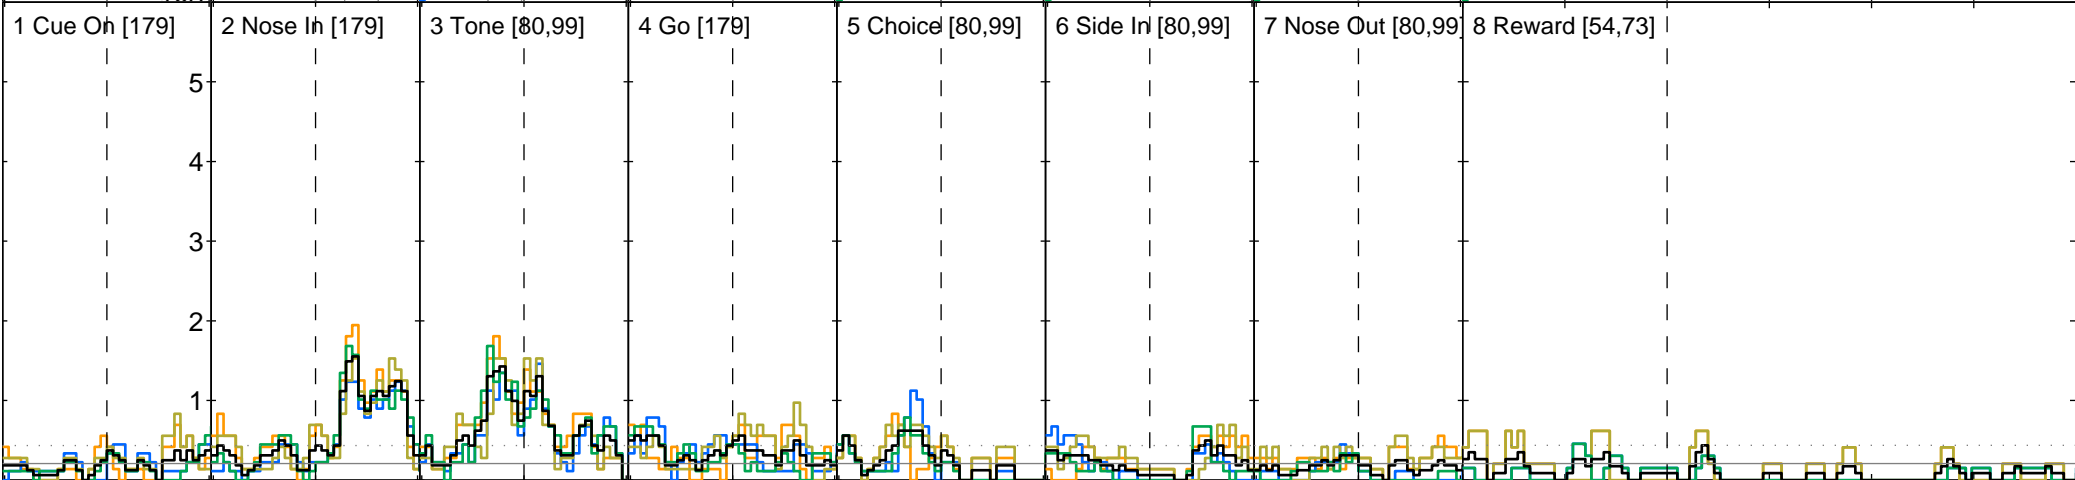

**Cell: C0520070405T05c**

AP: 2.2 ML: 1.2 DV: 7.5  
w: 4 n: 5502  $P_{ISI>2}$ : 0.82  
1/2pw: 198 $\mu$ s p->v: 1026 $\mu$ s  
 $\beta_T$ : NaN  $\beta_D$ : NaN  
 $\beta_P$ : NaN SI: NaN  
Session FR: 1.25 Hz  
Pk Ev: None  
Pk FR: --

MSN

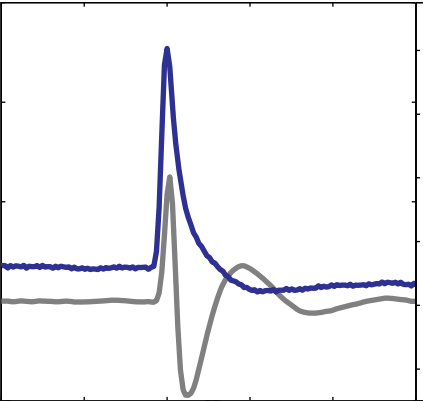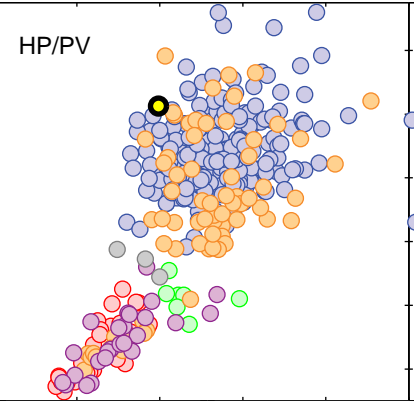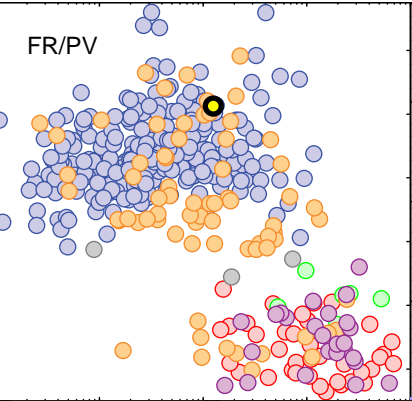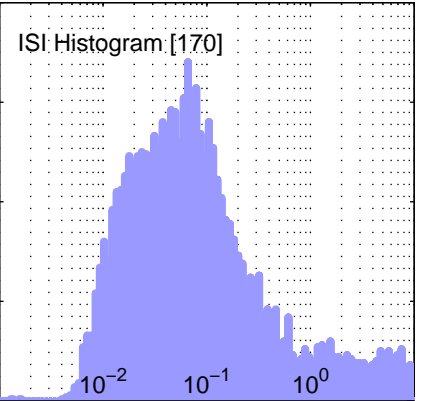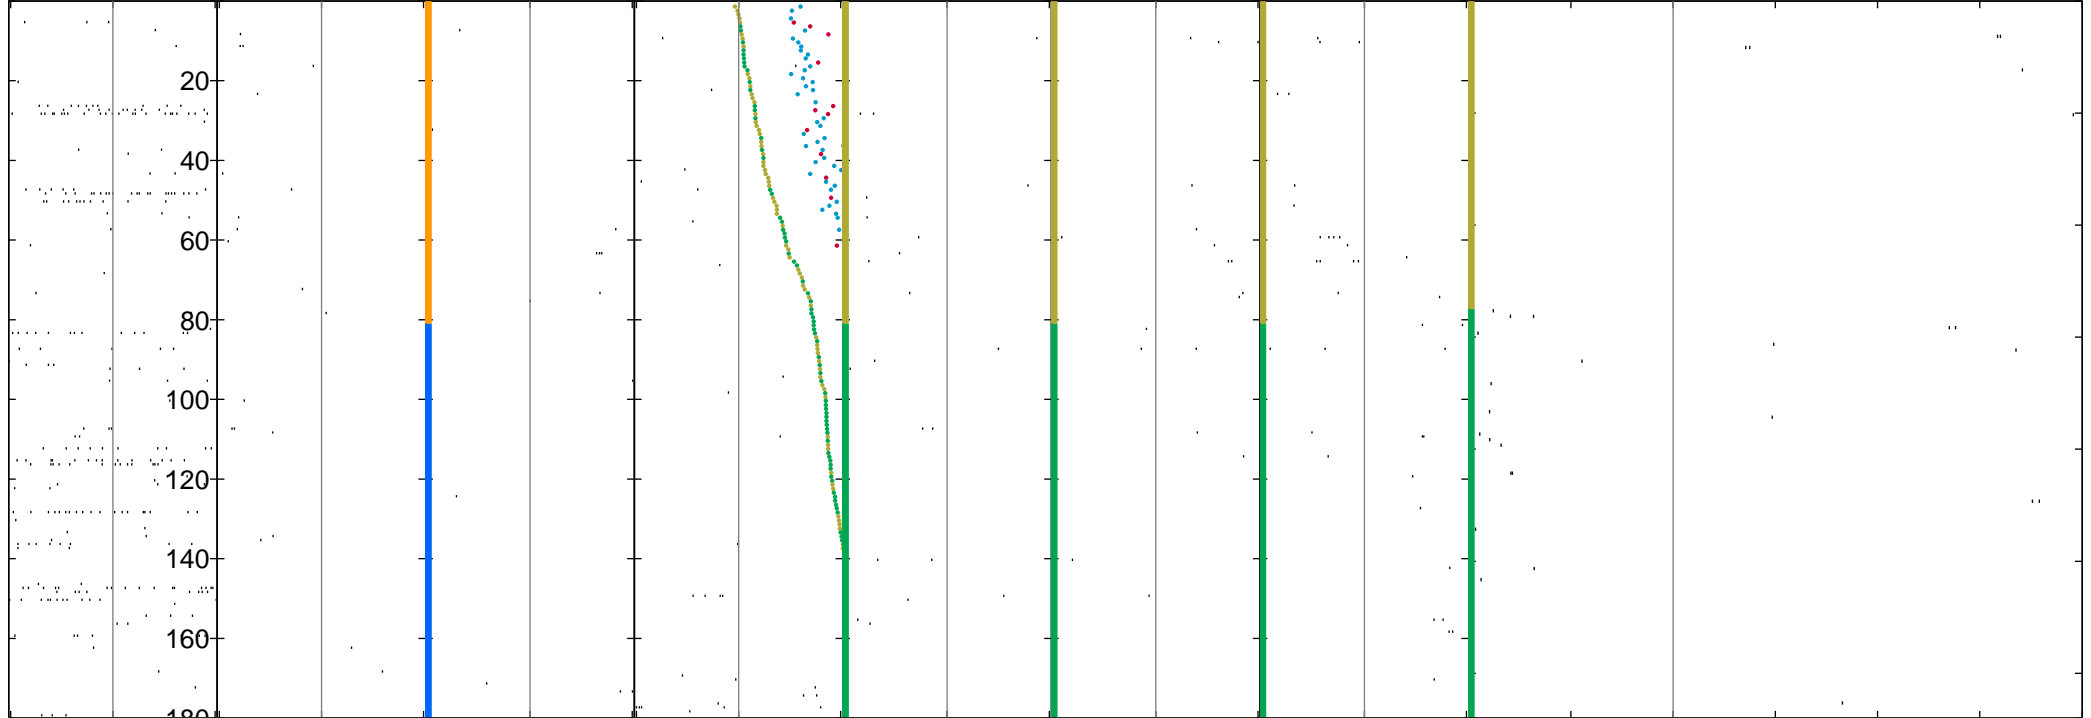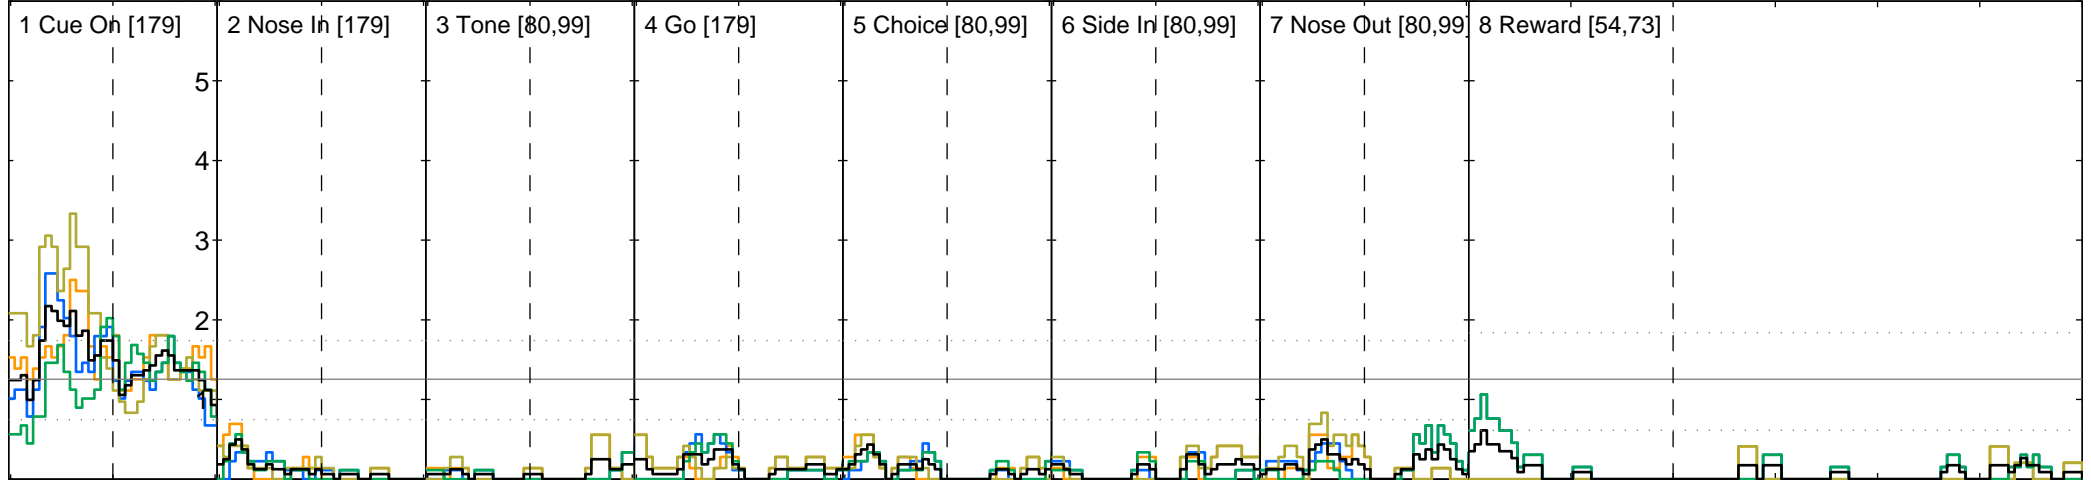

**Cell: C0520070405T11a**

AP: -0.48 ML: 4.6 DV: 4.4

w: 1 n: 810  $P_{ISI>2}$ : 0.791/2pw: 234 $\mu$ s p->v: 872 $\mu$ s $\beta_T$ : NaN  $\beta_D$ : NaN $\beta_P$ : NaN SI: NaN

Session FR: 0.552 Hz

Pk Ev: None

Pk FR: --

**MSN**

Waveform

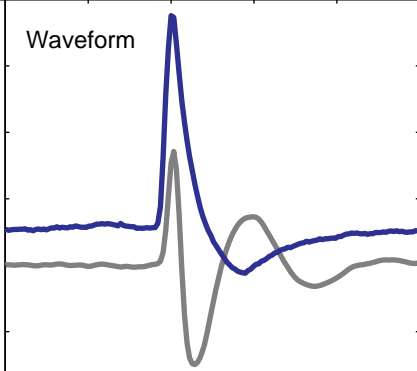

HP/PV

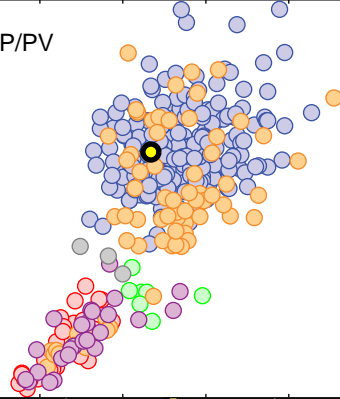

FR/PV

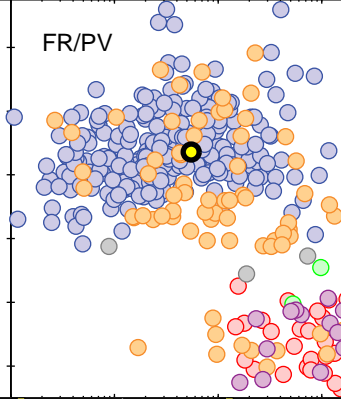

ISI Histogram [26]

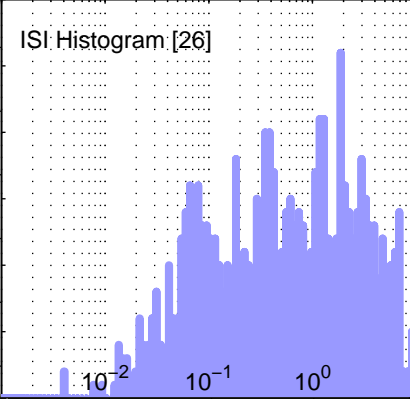

10

20

30

40

50

60

1 Cue On [62]

2 Nose In [62]

3 Tone [29,33]

4 Go [62]

5 Choice [32,30]

6 Side In [32,30]

7 Nose Out [32,30]

8 Reward [21,22]

5

4

3

2

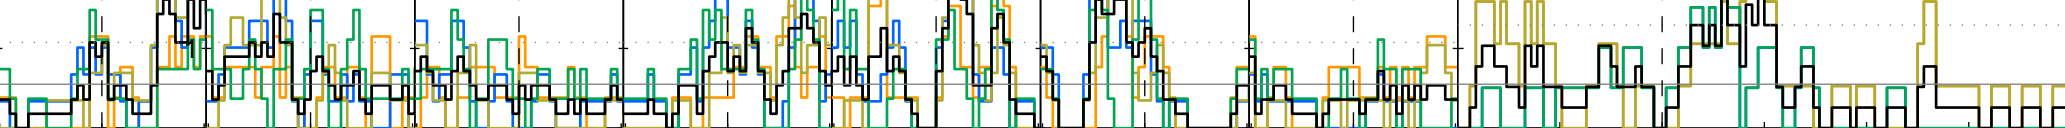

**Cell: C0520070406T09b**

AP: 0.72 ML: 2.4 DV: 4.7  
w: 3 n: 1385  $P_{ISI>2}$ : 0.93  
1/2pw: 277 $\mu$ s p->v: 859 $\mu$ s  
 $\beta_T$ : NaN  $\beta_D$ : NaN  
 $\beta_P$ : NaN SI: NaN  
Session FR: 0.317 Hz  
Pk Ev: None  
Pk FR: --

MSN

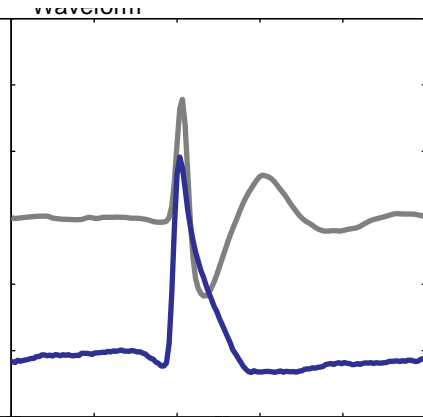

HP/PV

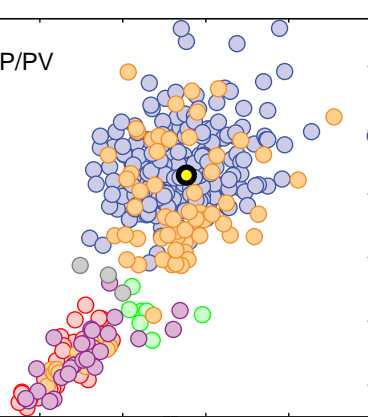

FR/PV

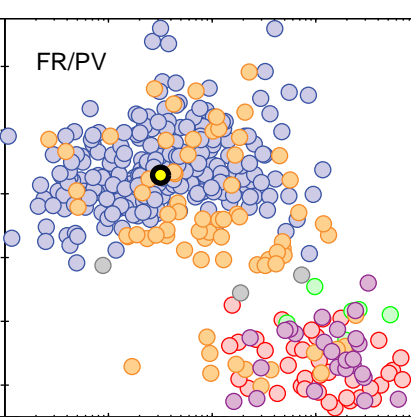

ISI Histogram [33]

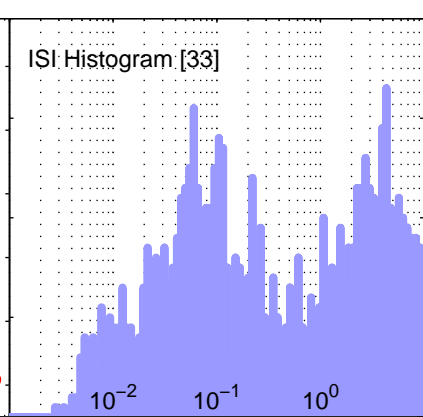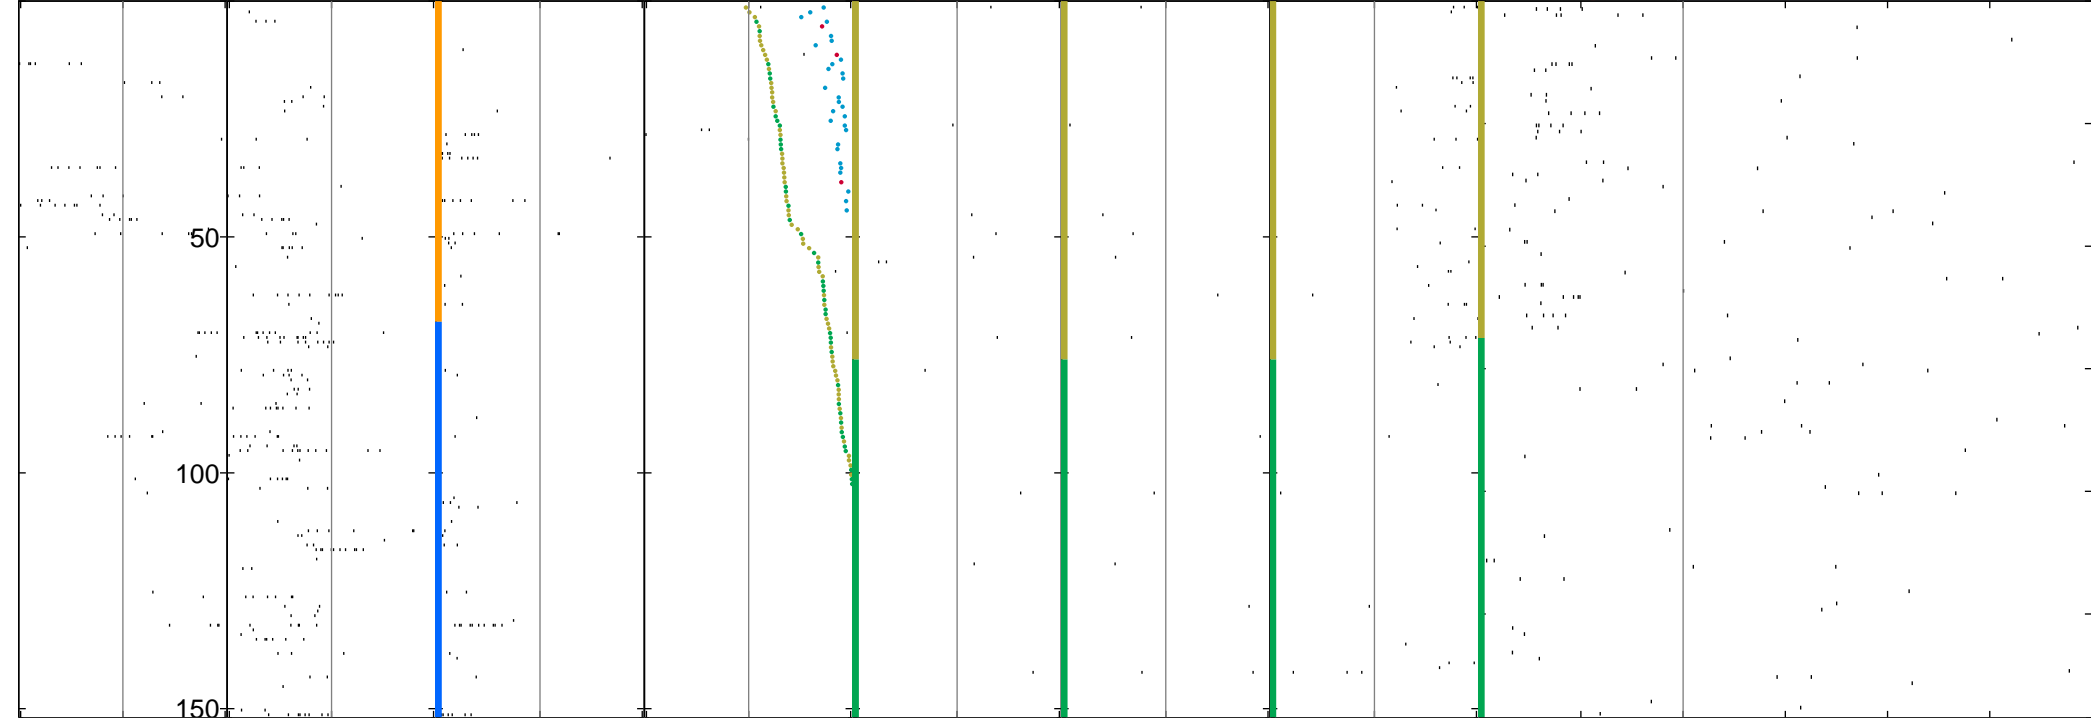

1 Cue On [151]

2 Nose In [151]

3 Tone [67,84]

4 Go [151]

5 Choice [75,76]

6 Side In [75,76]

7 Nose Out [75,76]

8 Reward [54,62]

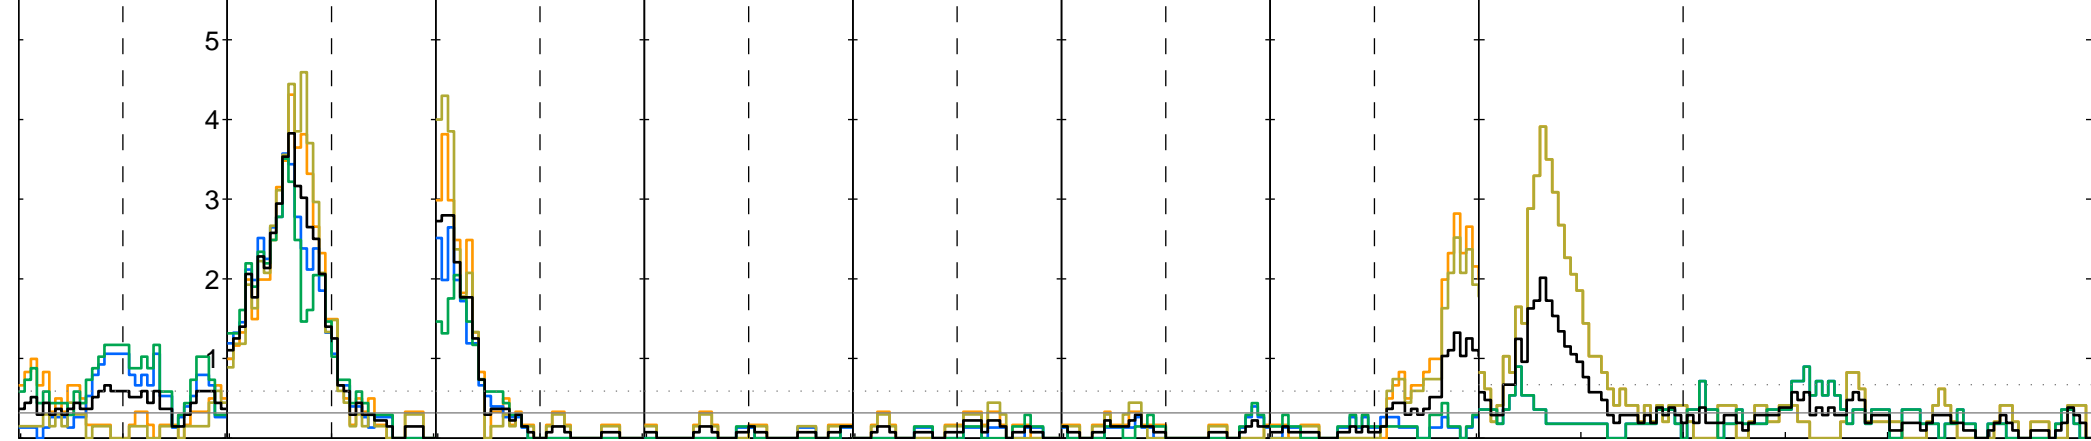



**Cell: C0520070406T11a**

AP: -0.48 ML: 4.6 DV: 4.5  
w: 4 n: 2041  $P_{ISI>2}$ : 0.94  
1/2pw: 213 $\mu$ s p->v: 891 $\mu$ s  
 $\beta_T$ : NaN  $\beta_D$ : NaN  
 $\beta_P$ : NaN SI: NaN  
Session FR: 0.468 Hz  
Pk Ev: None  
Pk FR: --

MSN

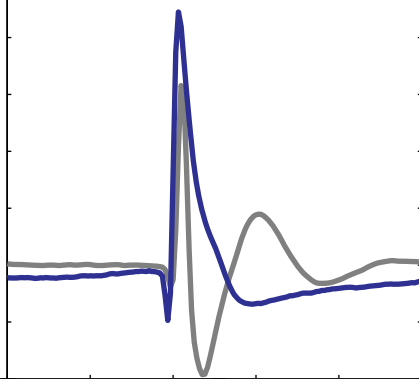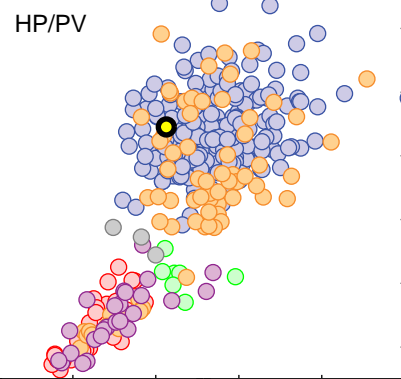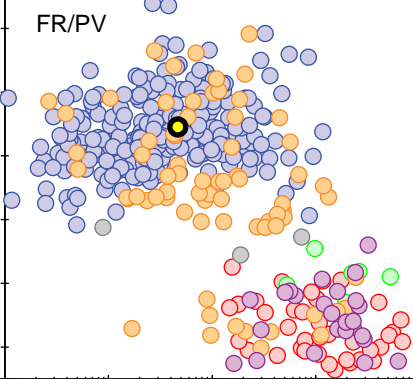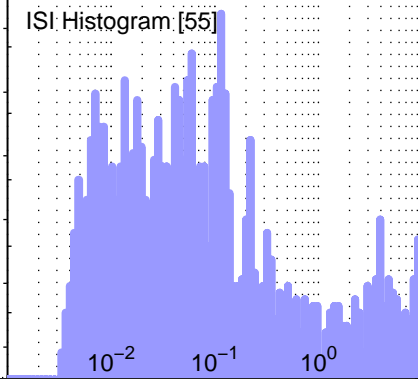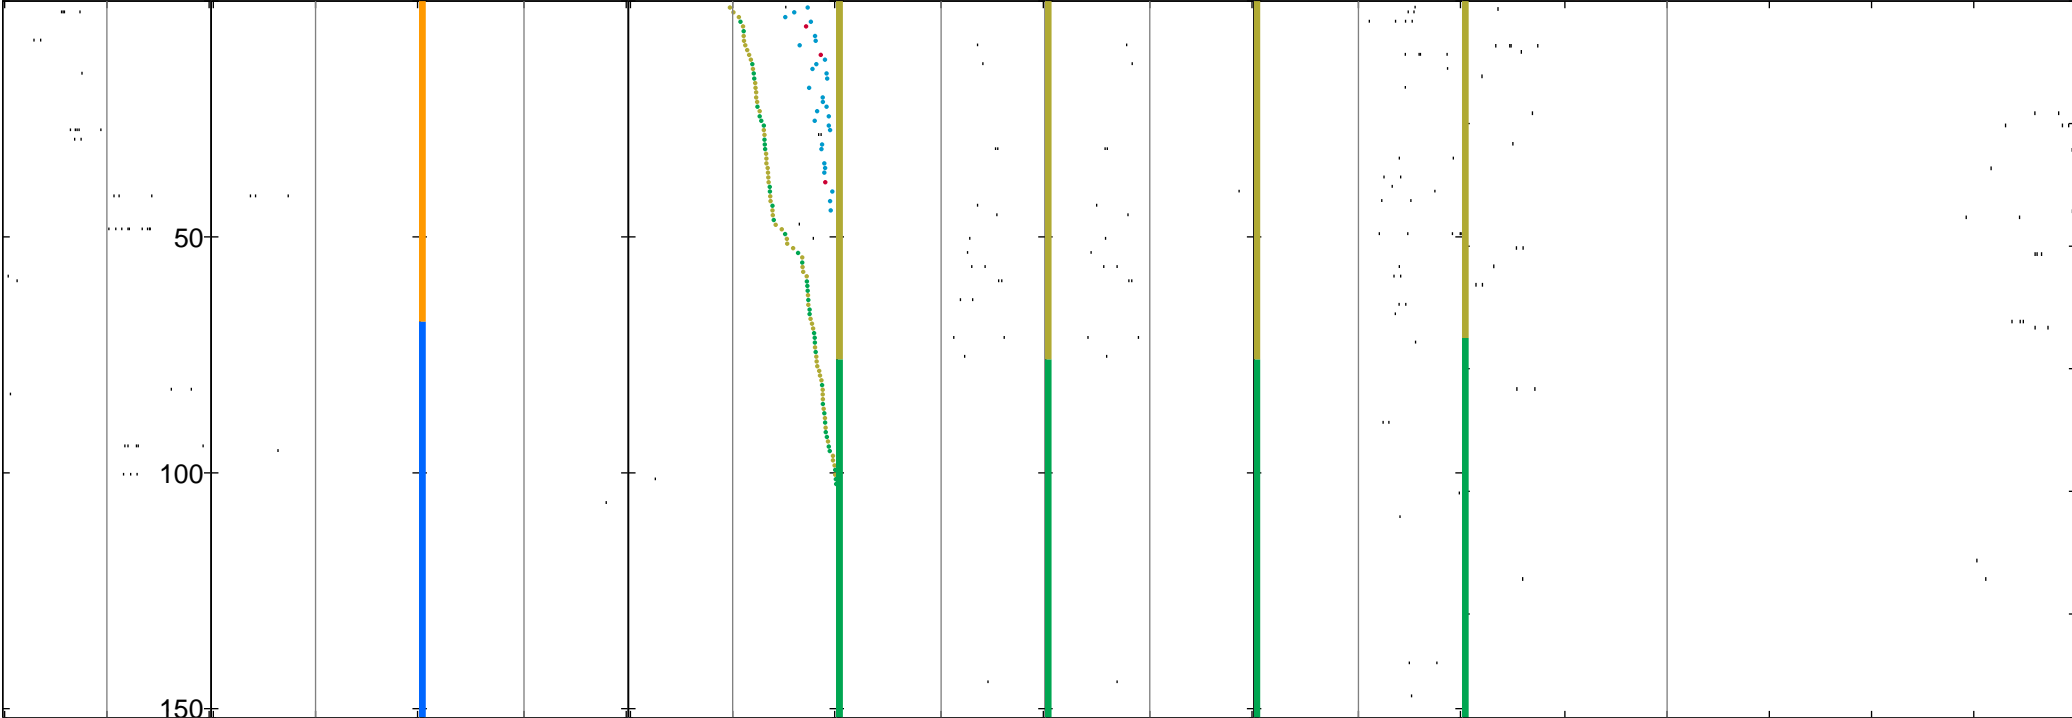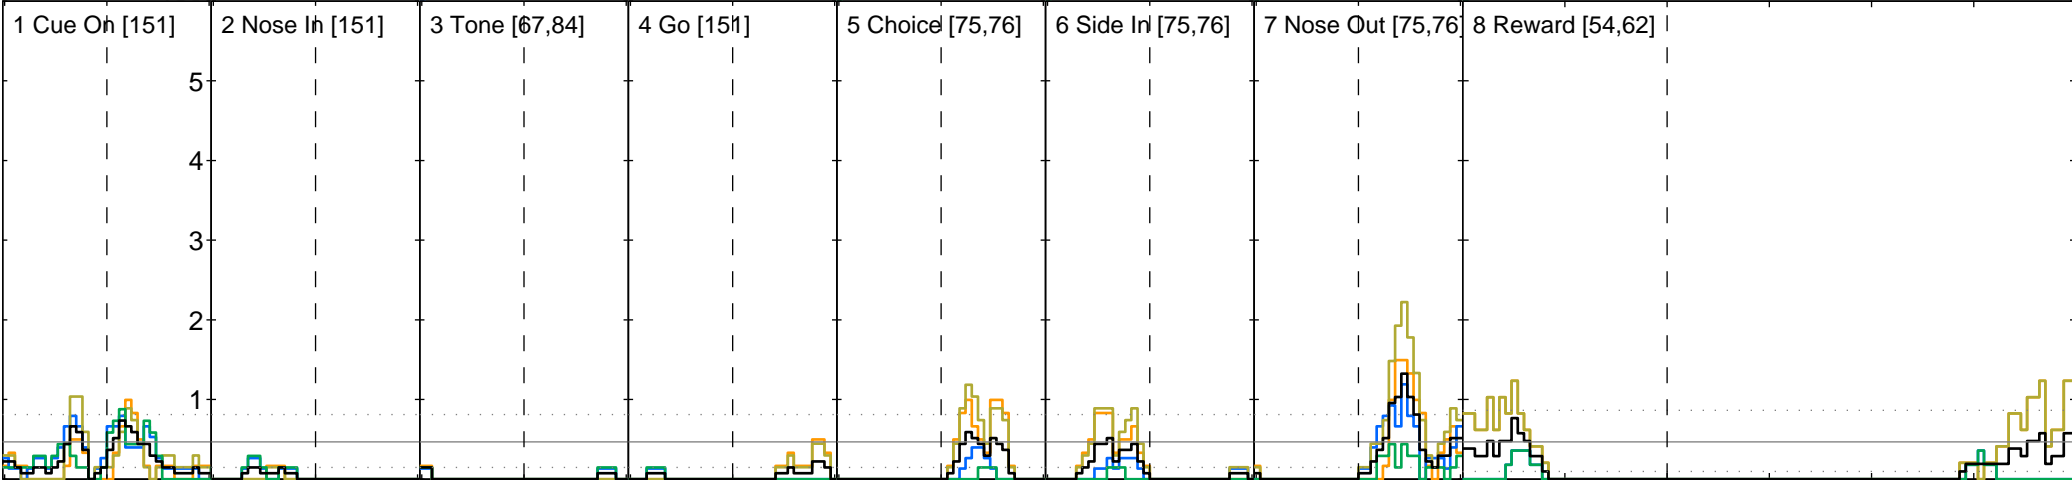

**Cell: C0520070406T11b**

AP: -0.48 ML: 4.6 DV: 4.5  
w: 1 n: 575  $P_{ISI>2}$ : 0.98  
1/2pw: 200 $\mu$ s p->v: 949 $\mu$ s  
 $\beta_T$ : NaN  $\beta_D$ : NaN  
 $\beta_P$ : NaN SI: NaN  
Session FR: 0.132 Hz  
Pk Ev: None  
Pk FR: --

MSN

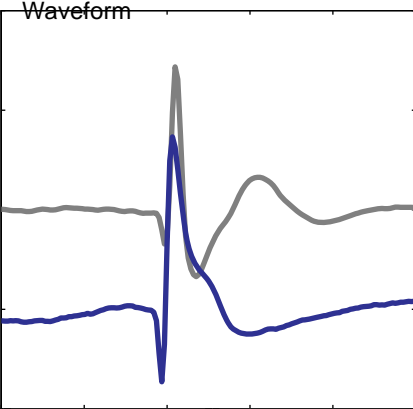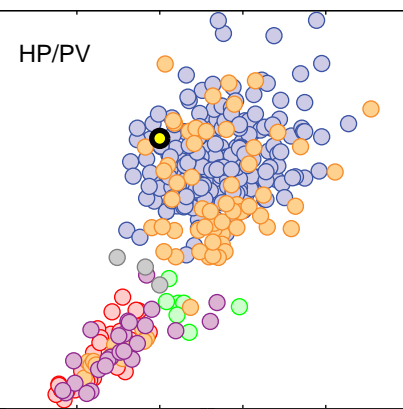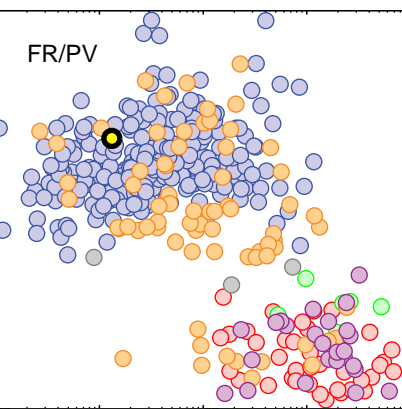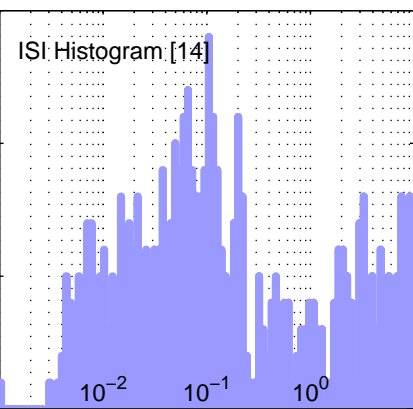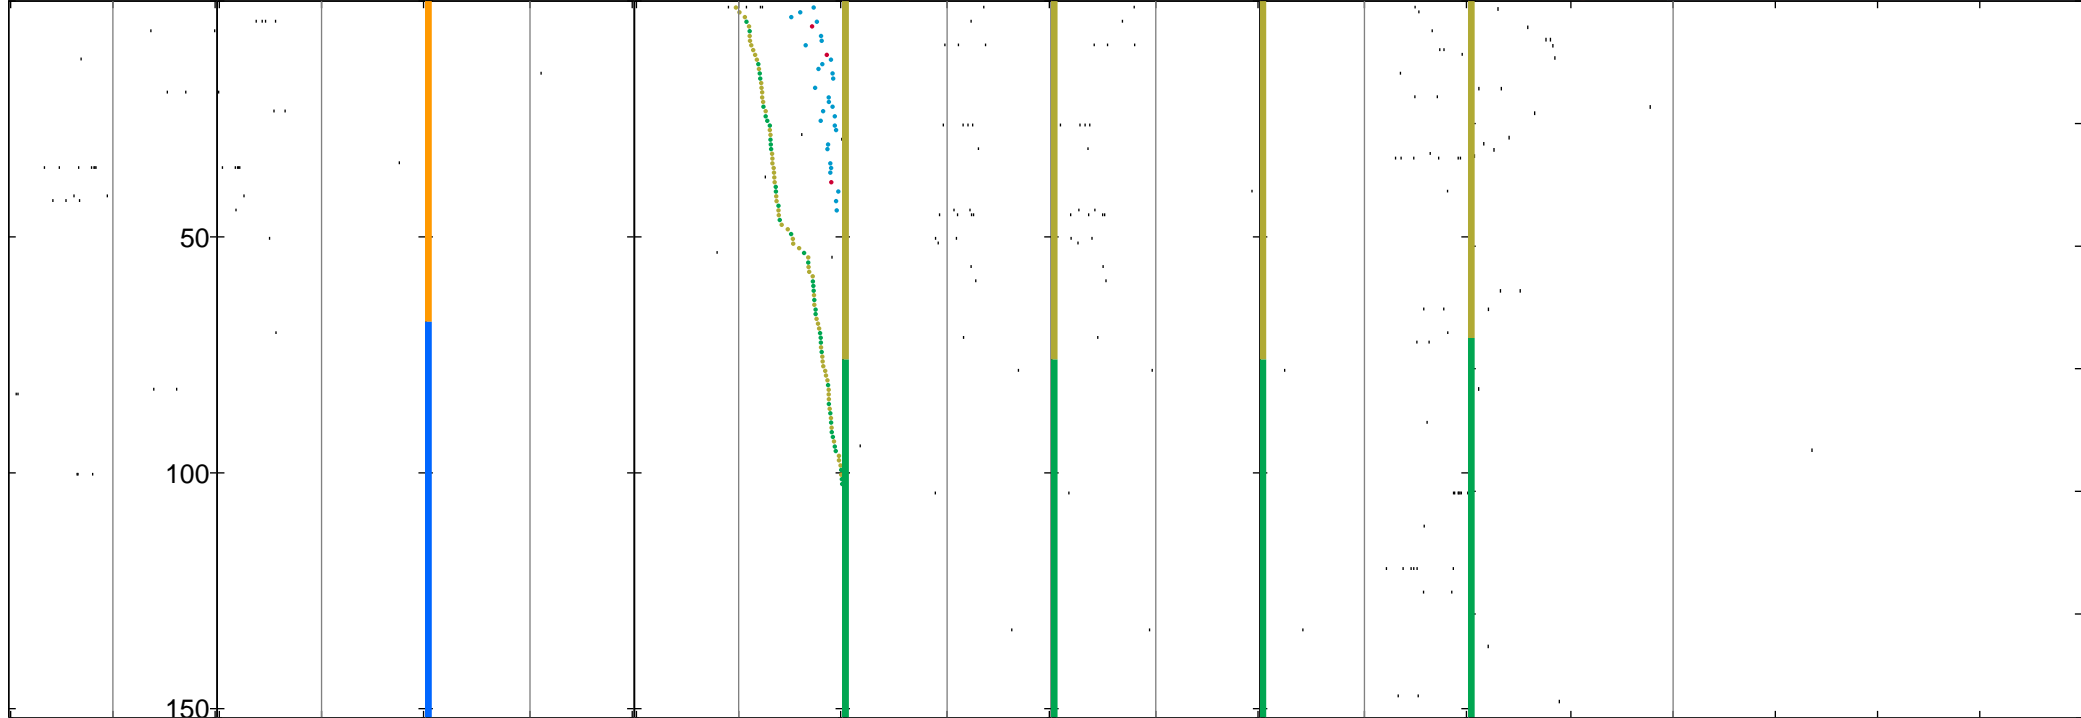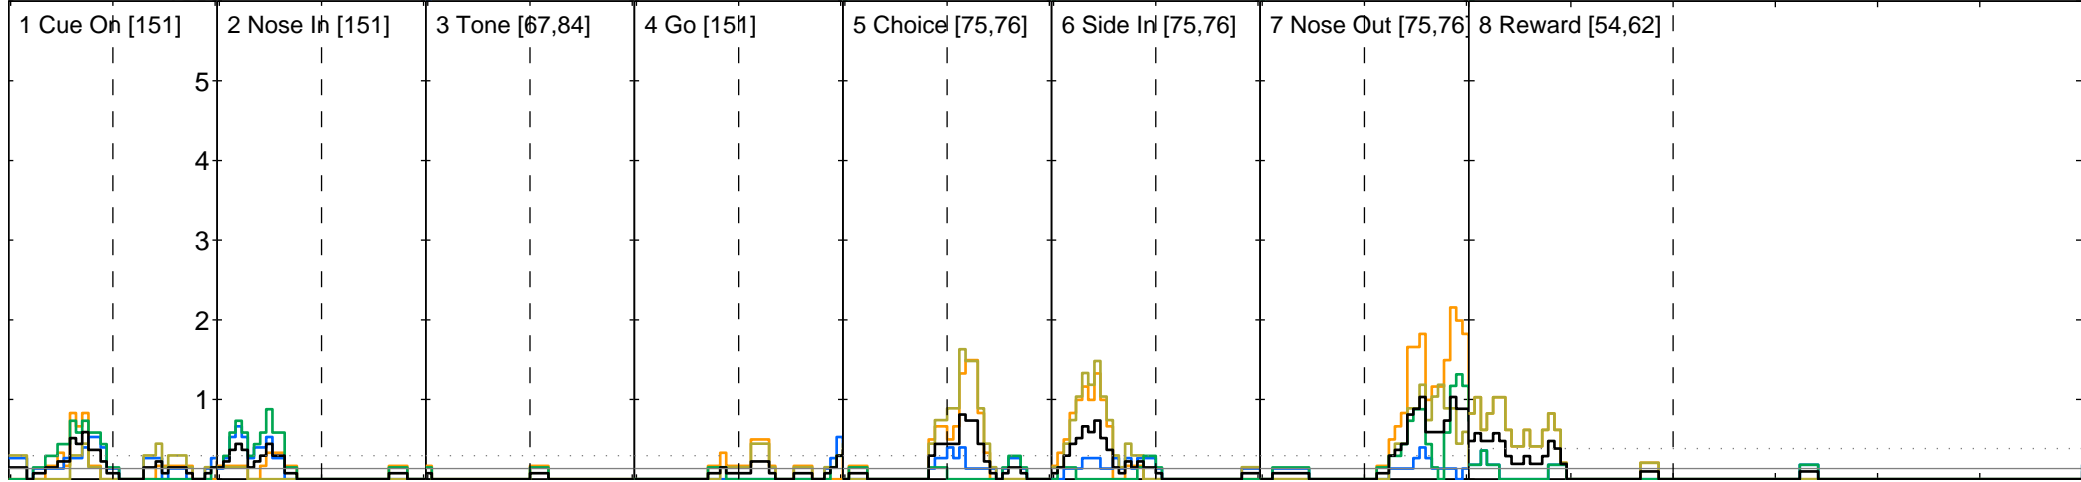

**Cell: C0520070417T07a**

AP: 1.3 ML: 3.4 DV: 4.5  
w: 3 n: 712  $P_{ISI>2}$ : 0.96  
1/2pw: 293 $\mu$ s p->v: 776 $\mu$ s  
 $\beta_T$ : NaN  $\beta_D$ : NaN  
 $\beta_P$ : NaN SI: NaN  
Session FR: 0.218 Hz  
Pk Ev: None  
Pk FR: --

MSN

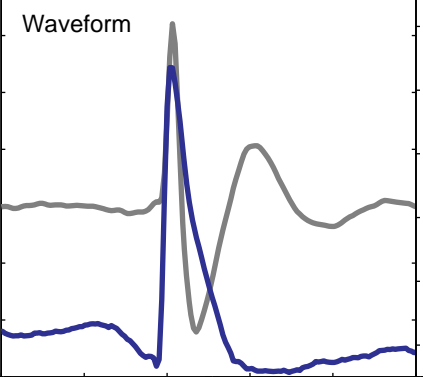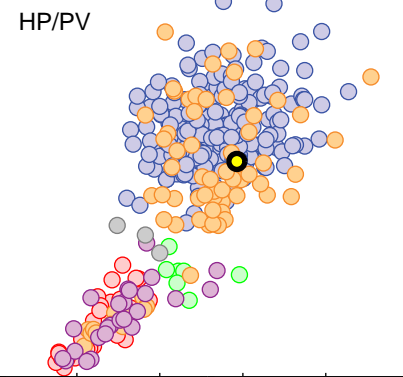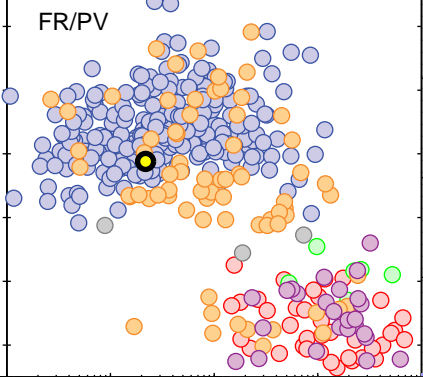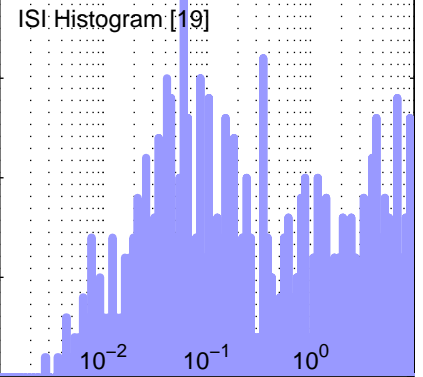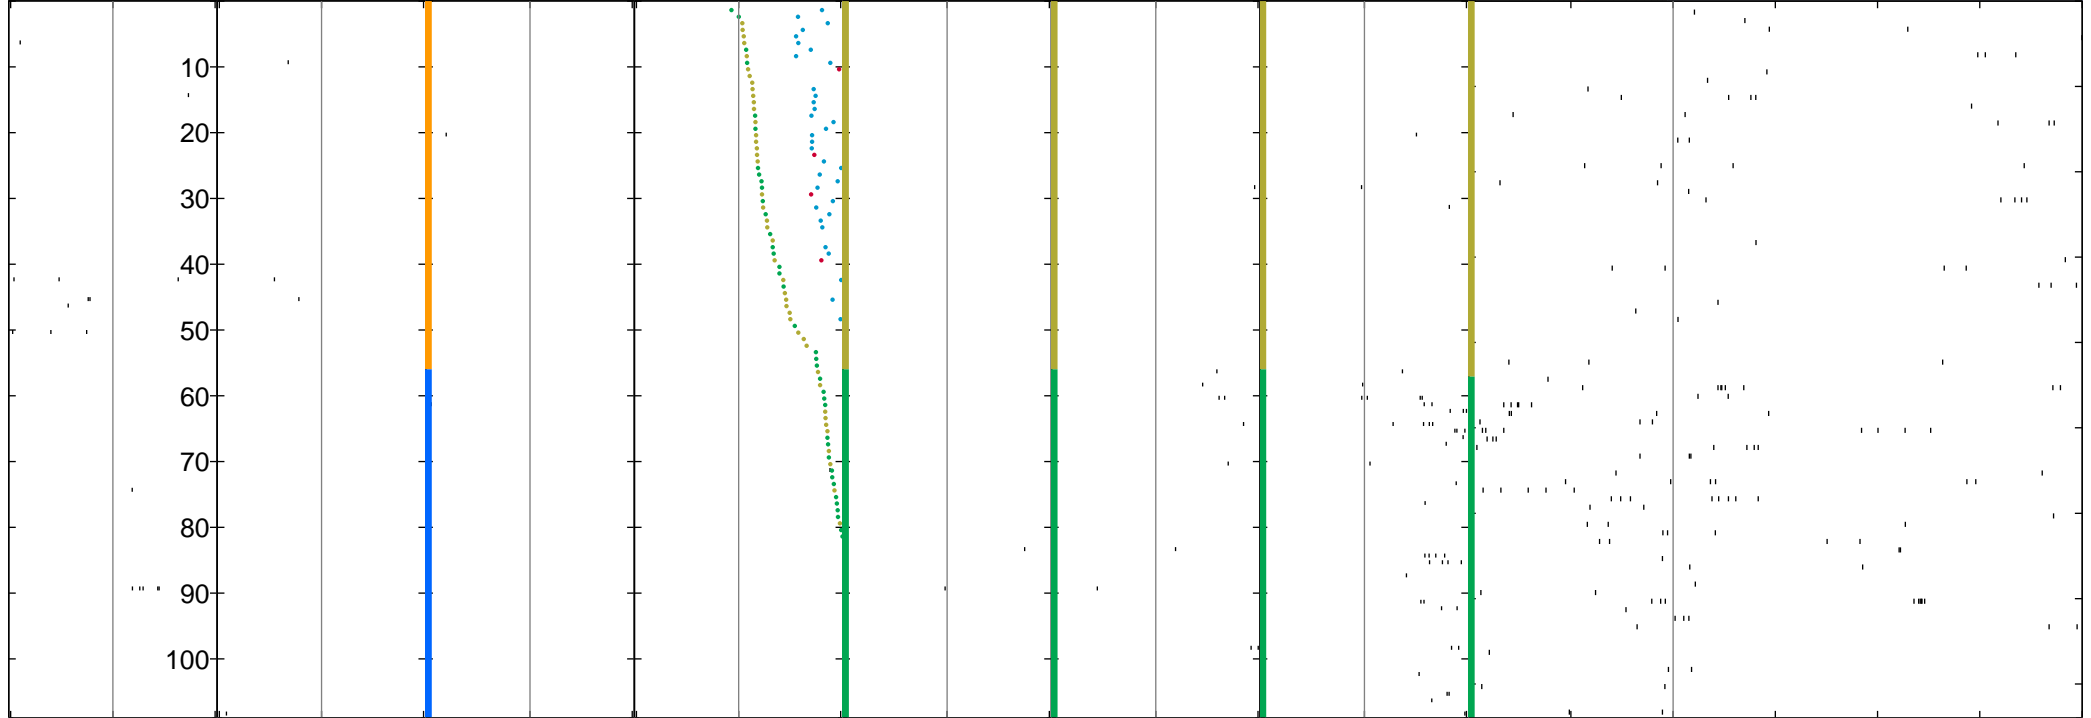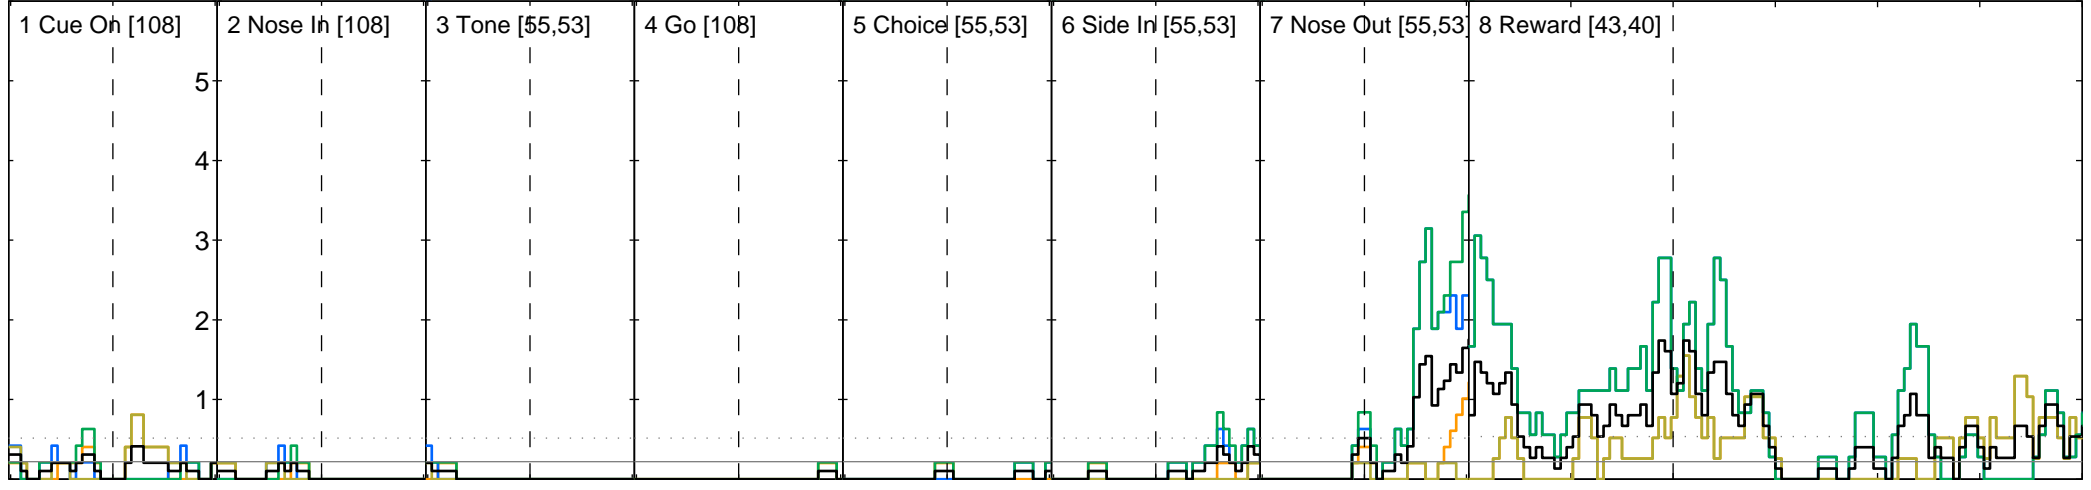

**Cell: C0520070417T07c**

AP: 1.3 ML: 3.4 DV: 4.5  
w: 2 n: 962  $P_{ISI>2}$ : 0.94  
1/2pw: 315 $\mu$ s p->v: 1026 $\mu$ s  
 $\beta_T$ : NaN  $\beta_D$ : NaN  
 $\beta_P$ : NaN SI: NaN  
Session FR: 0.302 Hz  
Pk Ev: None  
Pk FR: --

MSN

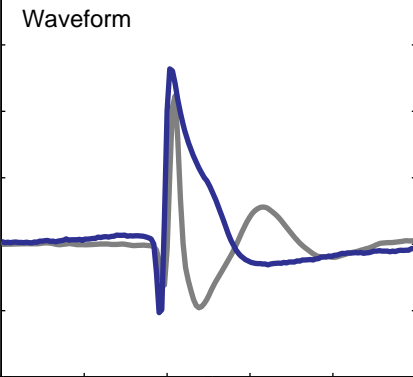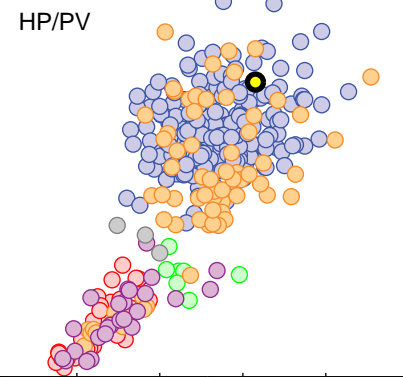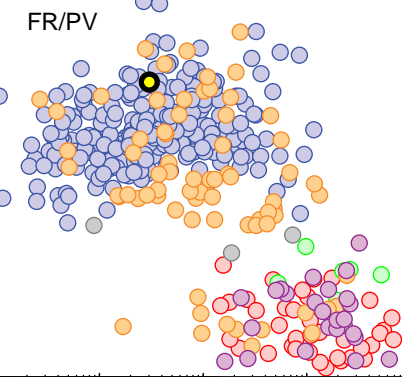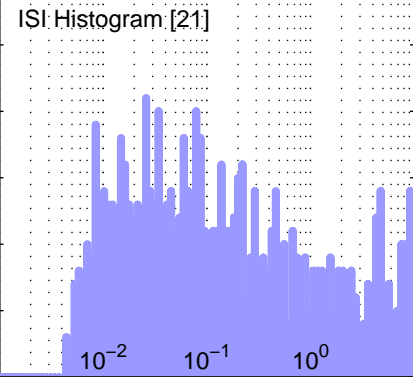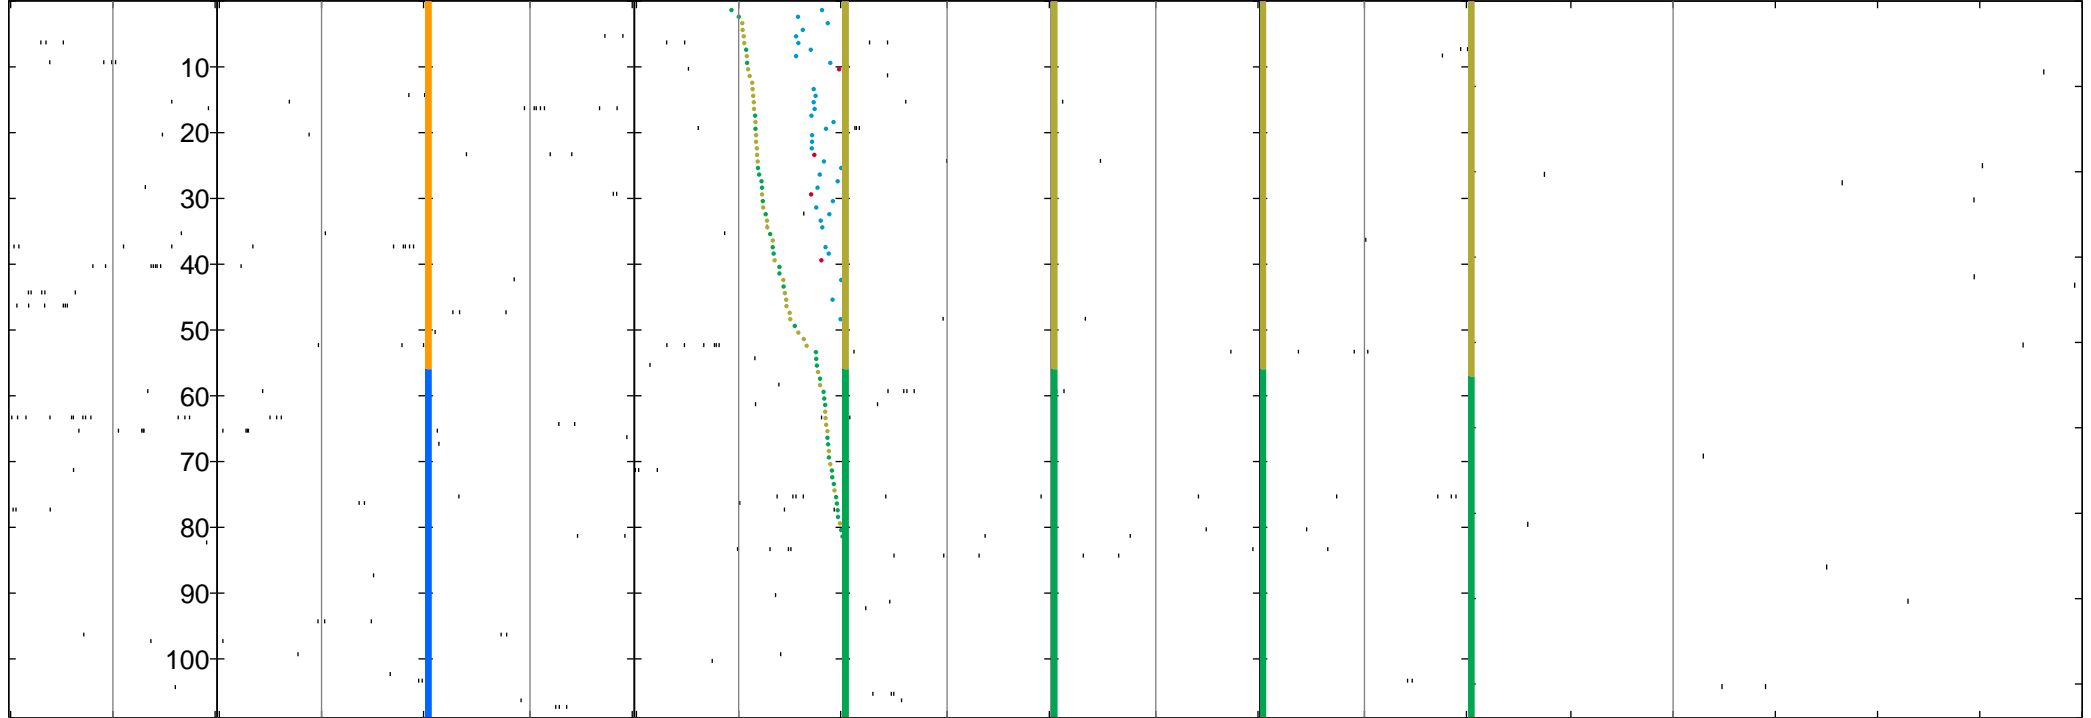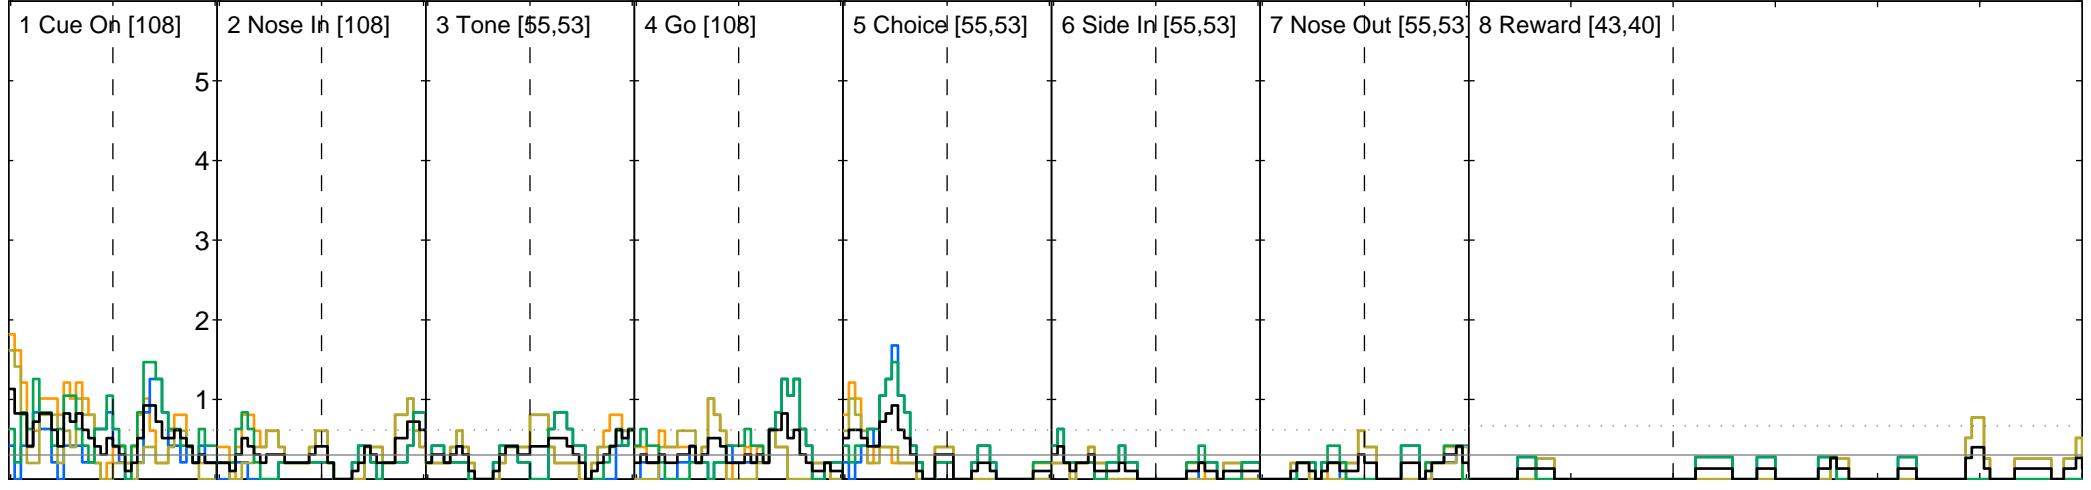

**Cell: C0520070417T07d**

AP: 1.3 ML: 3.4 DV: 4.5

w: 2 n: 818  $P_{ISI>2}$ : 0.931/2pw: 275 $\mu$ s p->v: 747 $\mu$ s $\beta_T$ : 0.96  $\beta_D$ : 2.1 $\beta_P$ : 2 SI: NaN

Session FR: 0.251 Hz

Pk Ev: None

Pk FR: --

MSN

Waveform

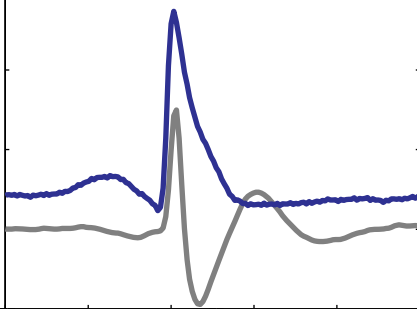

HP/PV

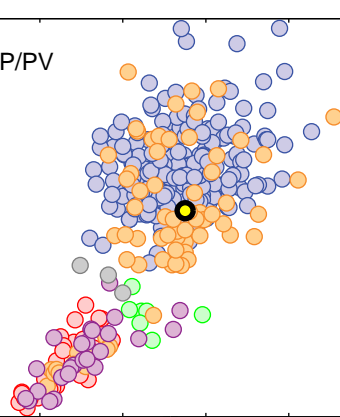

FR/PV

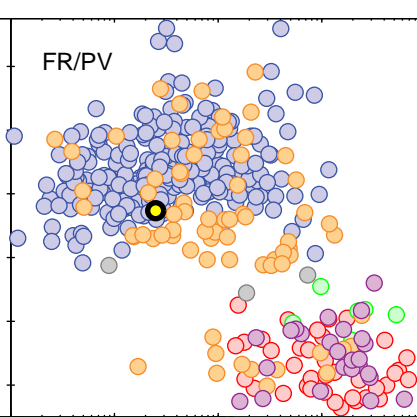

ISI Histogram [25]

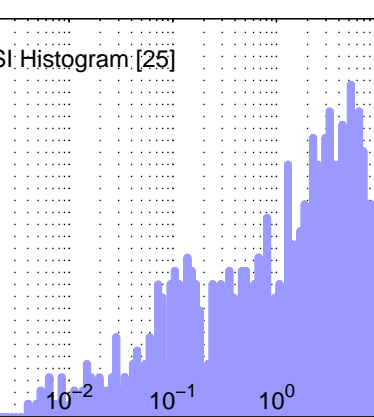10  
20  
30  
40  
50  
60  
70  
80  
90  
100

1 Cue On [108]

2 Nose In [108]

3 Tone [55,53]

4 Go [108]

5 Choice [55,53]

6 Side In [55,53]

7 Nose Out [55,53]

8 Reward [43,40]

5  
4  
3  
2  
1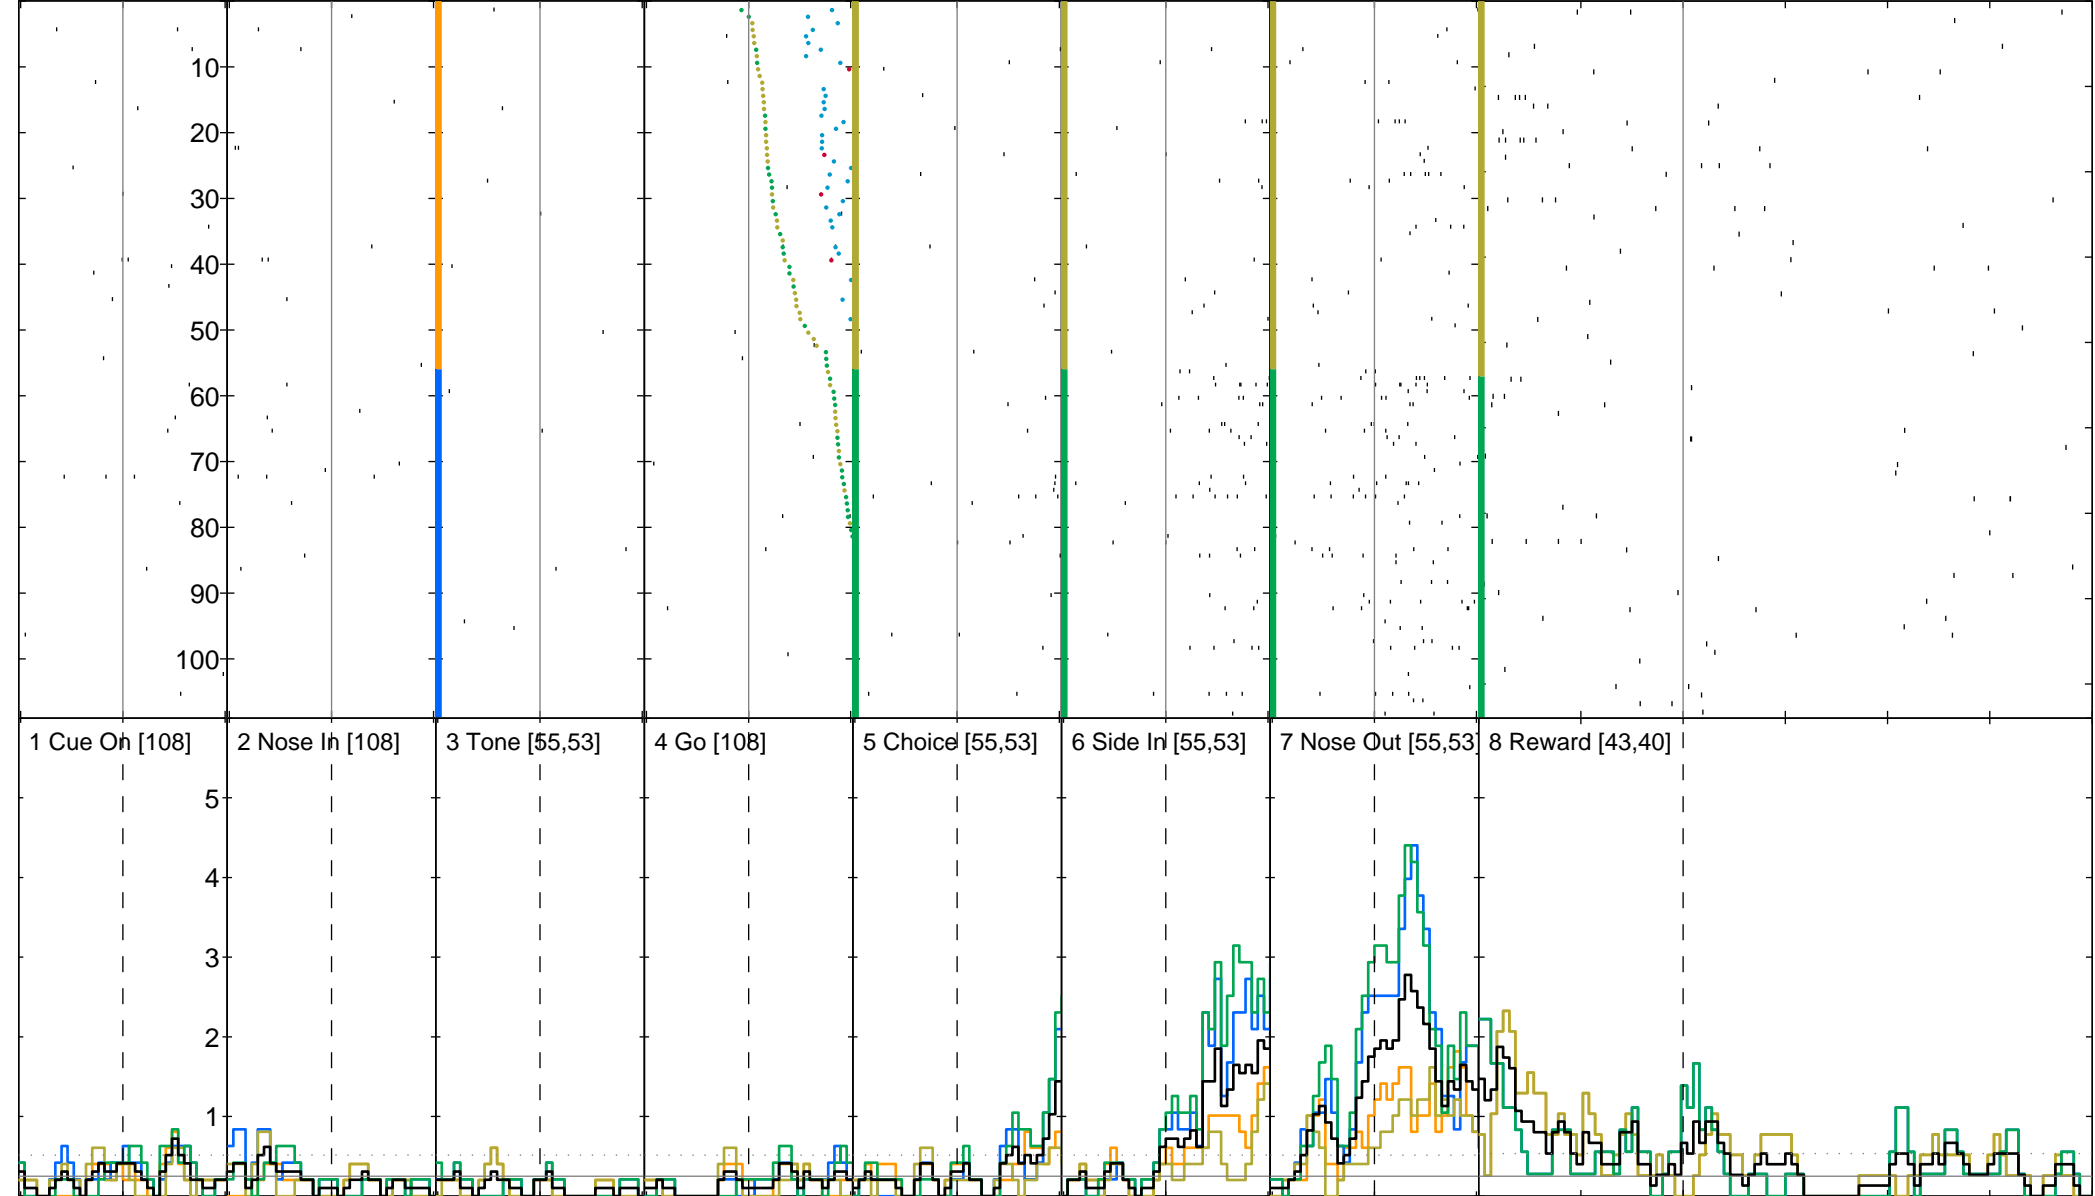

**Cell: C0520070417T07F**

AP: 1.3 ML: 3.4 DV: 4.5  
w: 2 n: 772  $P_{ISI>2}$ : 0.96  
1/2pw: 306 $\mu$ s p->v: 901 $\mu$ s  
 $\beta_T$ : NaN  $\beta_D$ : NaN  
 $\beta_P$ : NaN SI: NaN  
Session FR: 0.238 Hz  
Pk Ev: None  
Pk FR: --

MSN

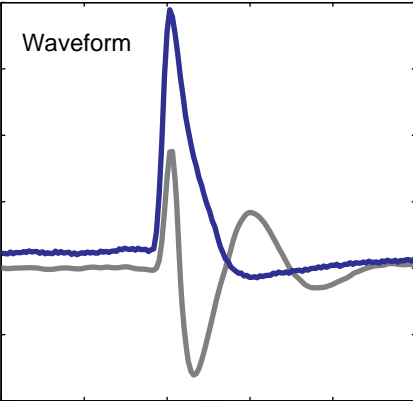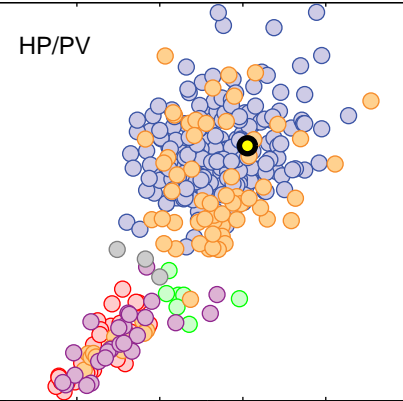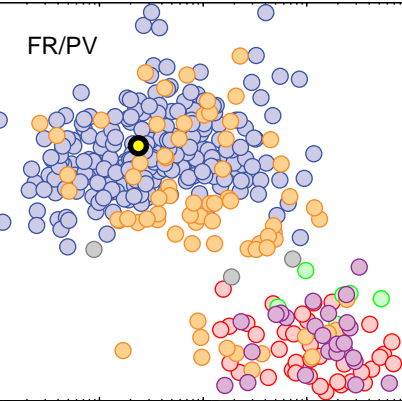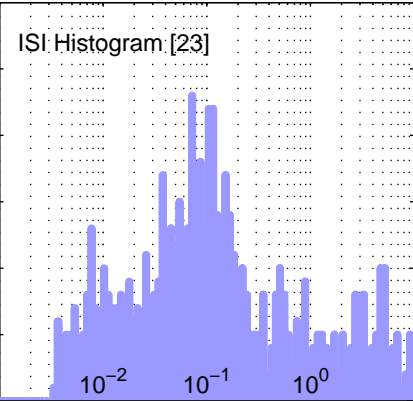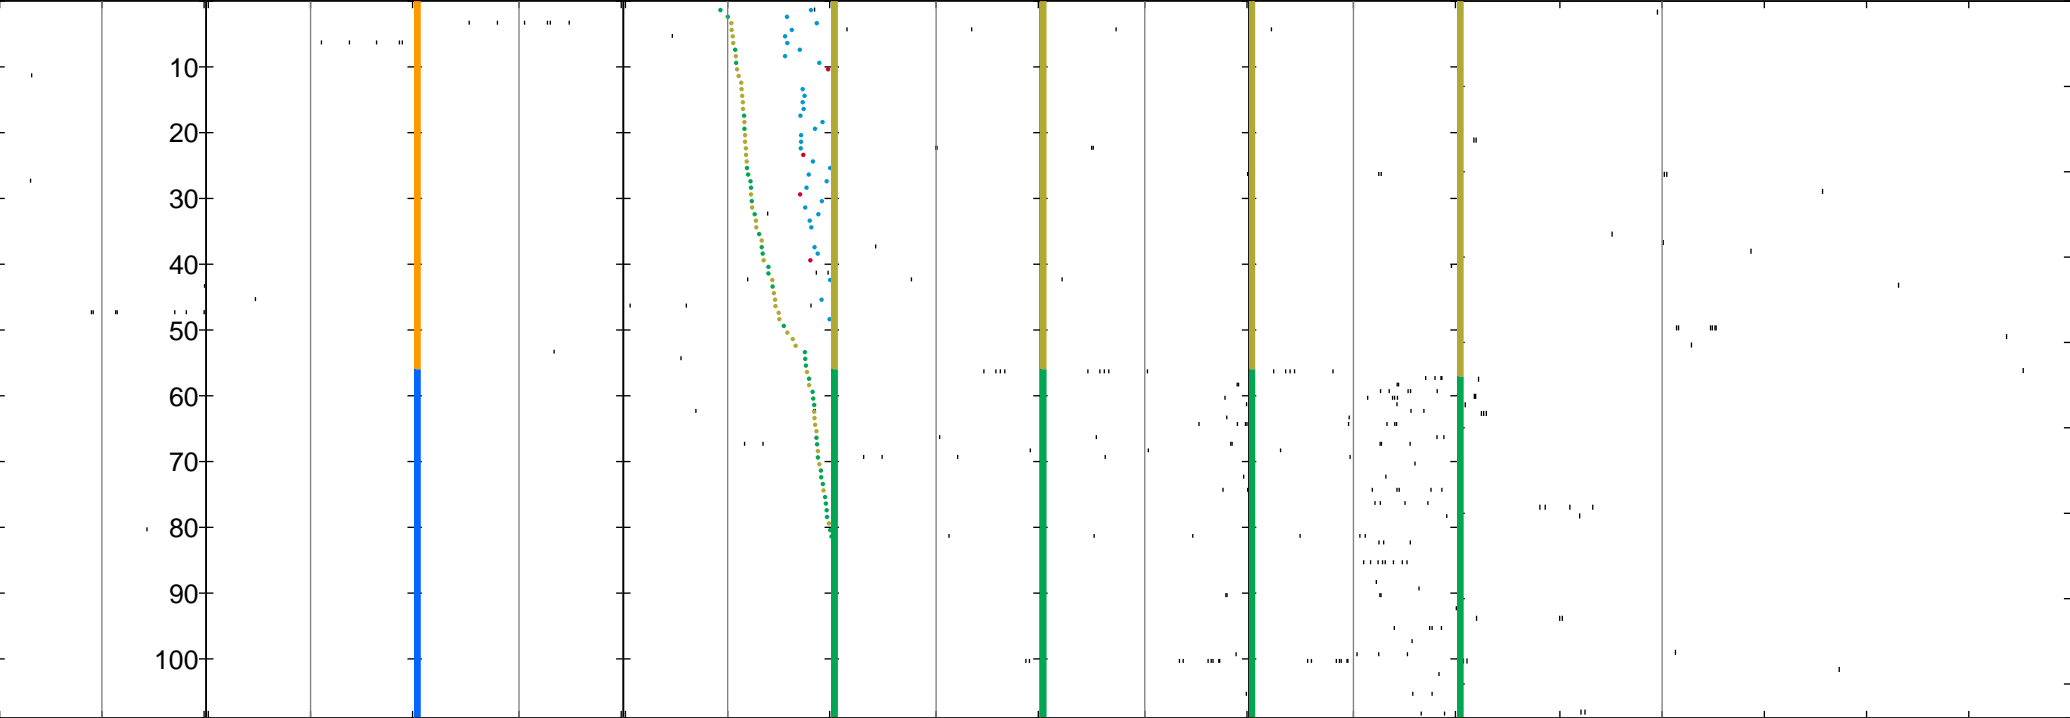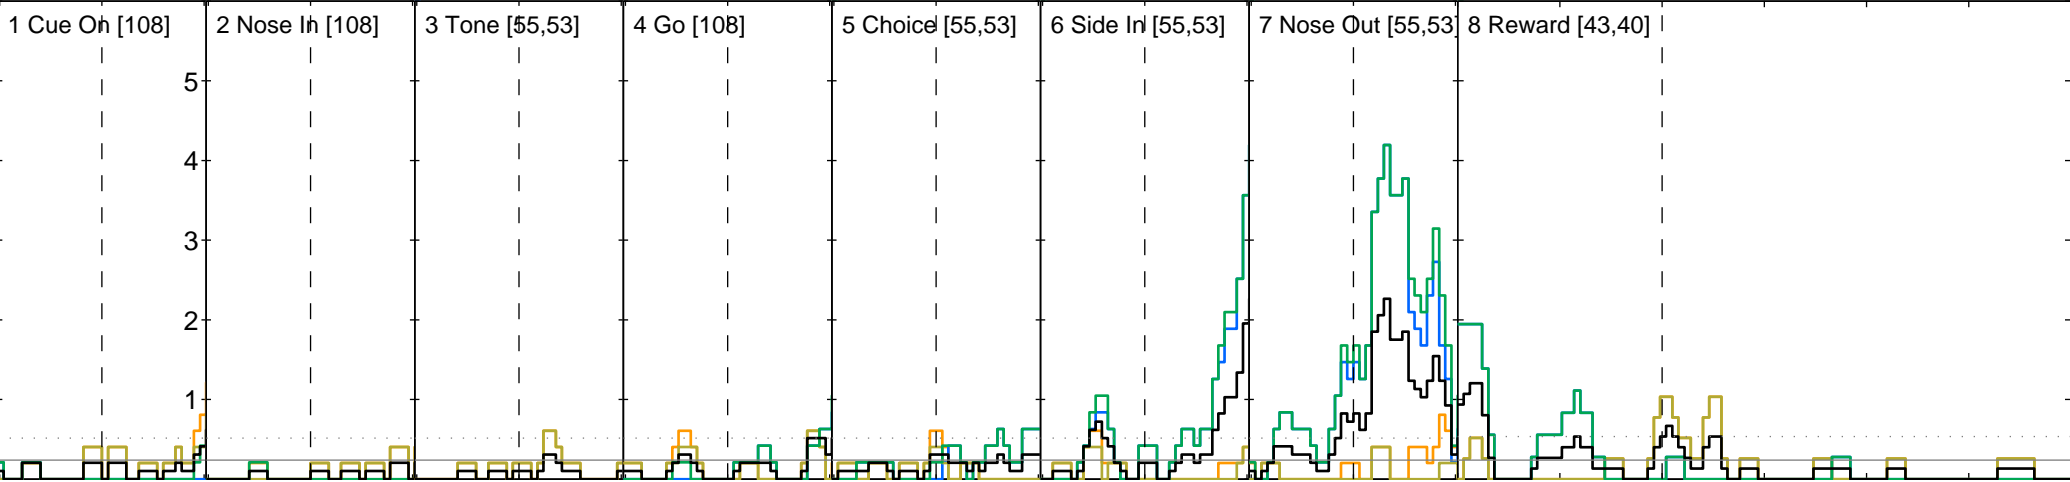

**Cell: C0520070417T07h**

AP: 1.3 ML: 3.4 DV: 4.5  
w: 3 n: 739  $P_{ISI>2}$ : 0.95  
1/2pw: 250 $\mu$ s p->v: 794 $\mu$ s  
 $\beta_T$ : NaN  $\beta_D$ : NaN  
 $\beta_P$ : NaN SI: NaN  
Session FR: 0.227 Hz  
Pk Ev: None  
Pk FR: --

MSN

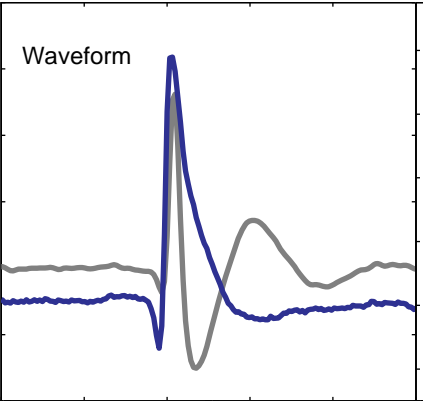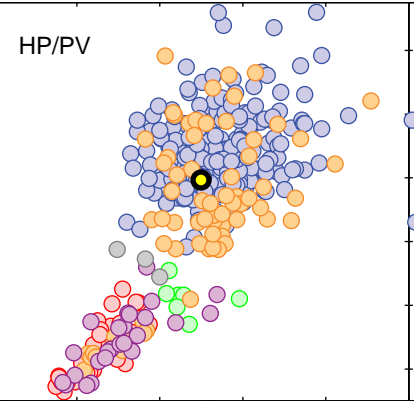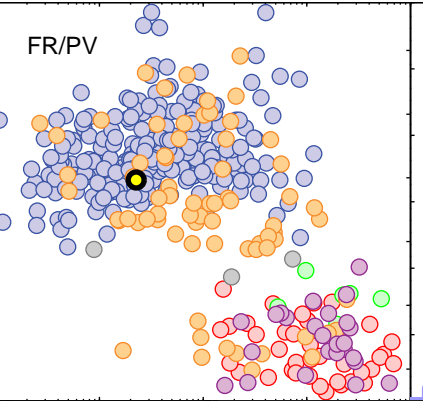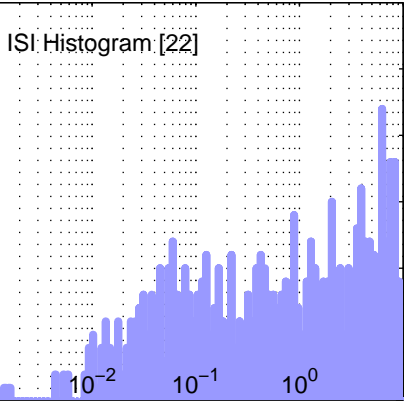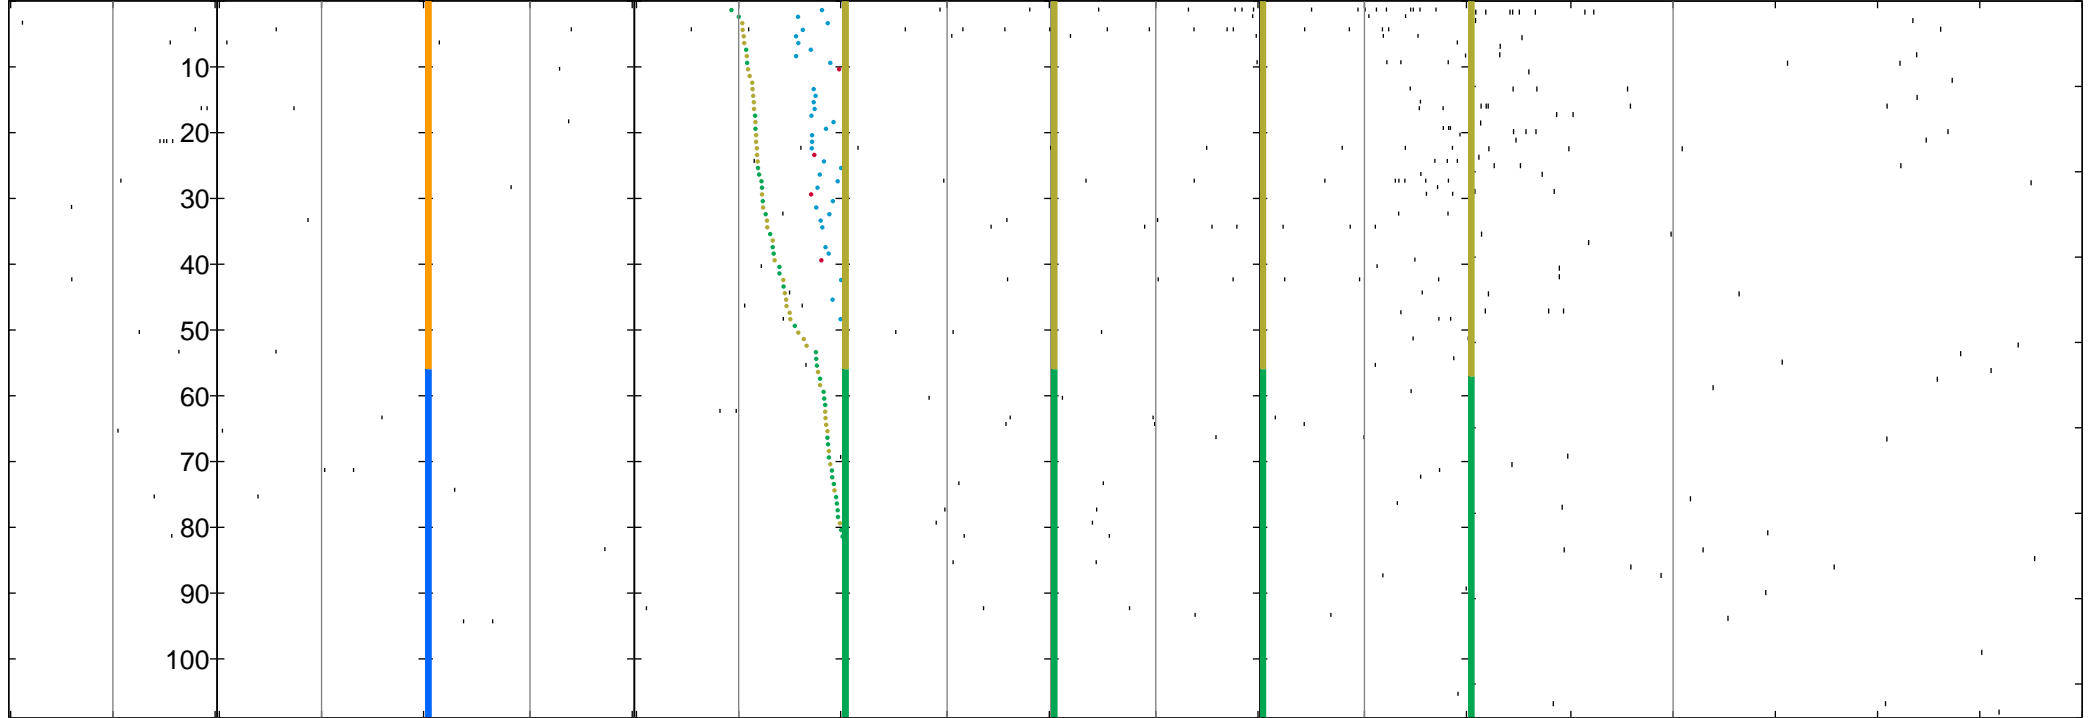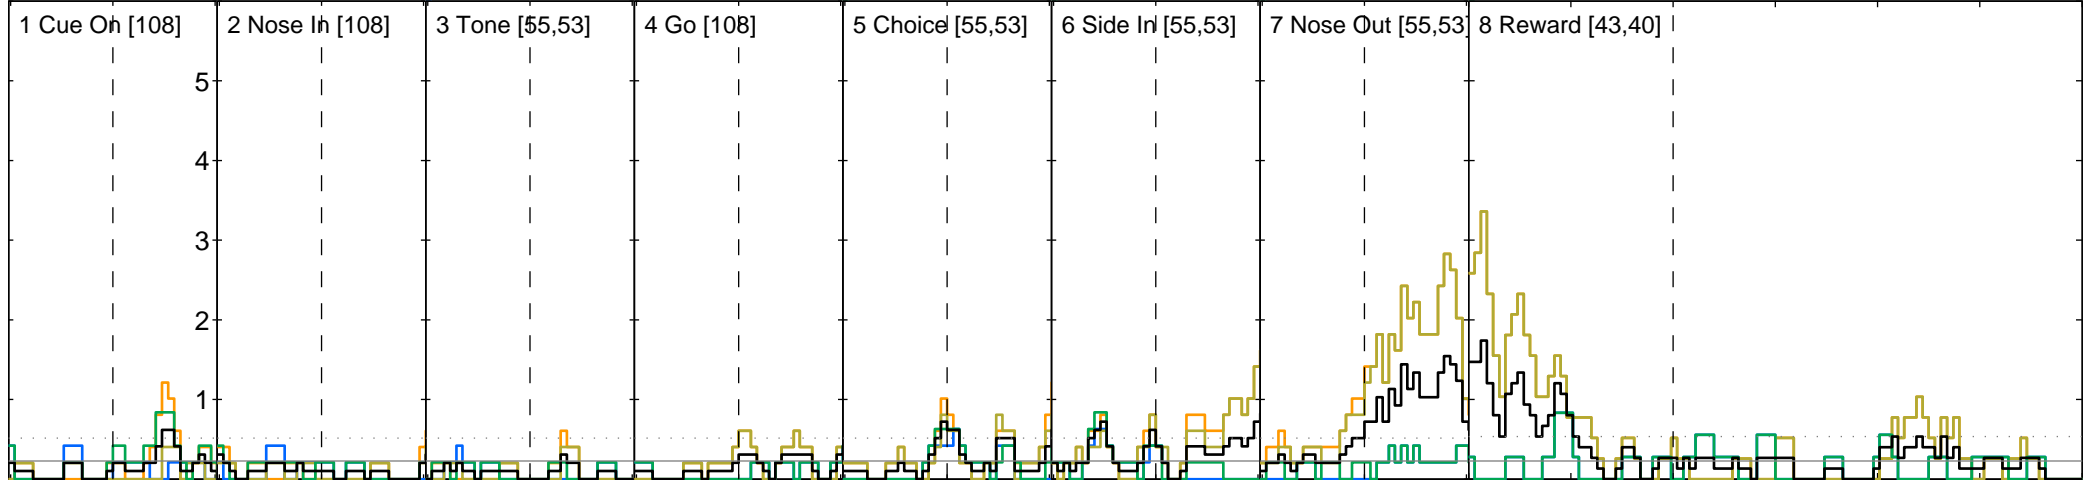

**Cell: C0520070417T12a**

AP: -0.48 ML: 3.9 DV: 5.6

w: 2 n: 445  $P_{ISI>2}$ : 0.98

1/2pw: 245 $\mu$ s p->v: 906 $\mu$ s

$\beta_T$ : NaN  $\beta_D$ : NaN

$\beta_P$ : NaN SI: NaN

Session FR: 0.137 Hz

Pk Ev: None

Pk FR: --

**MSN**

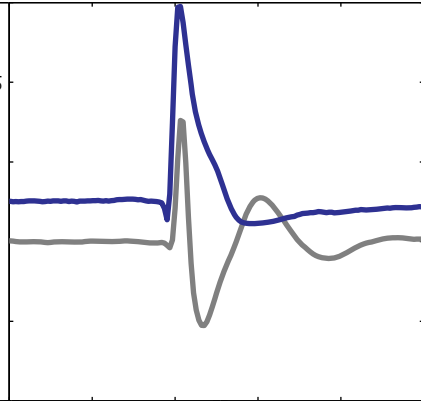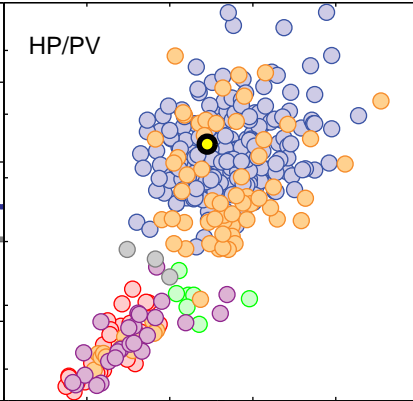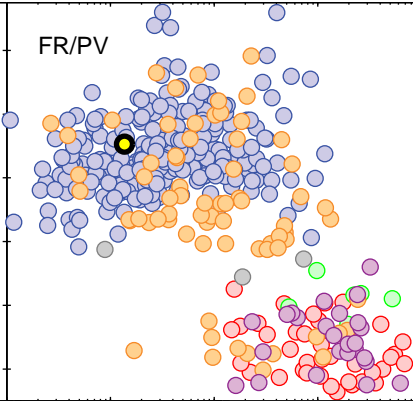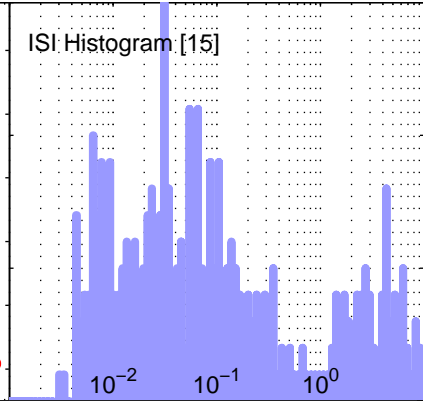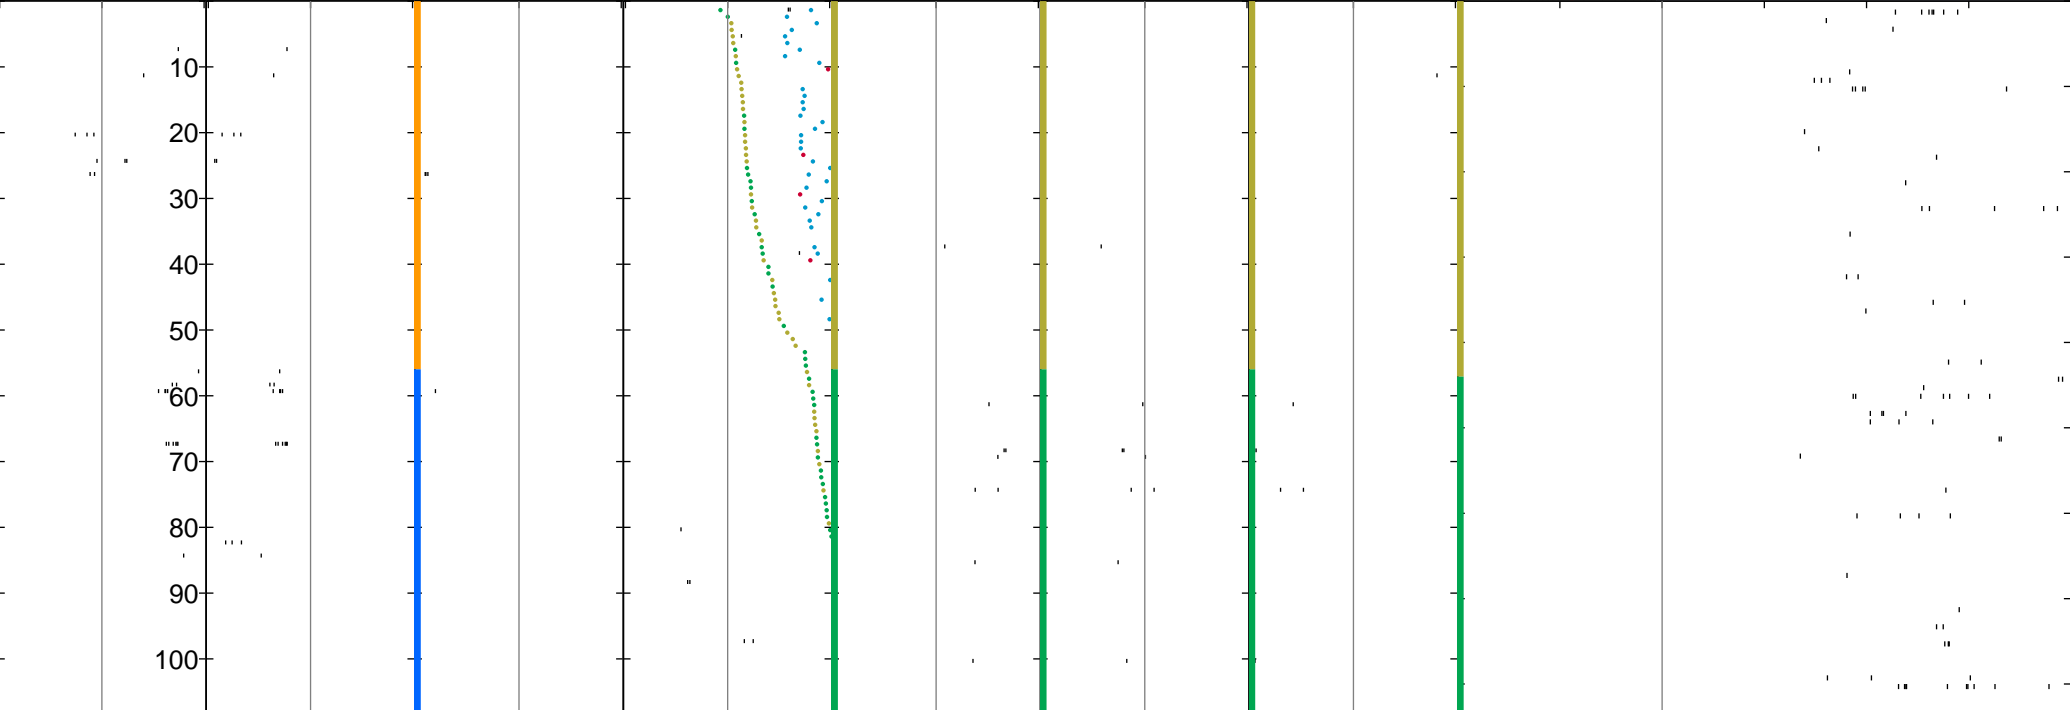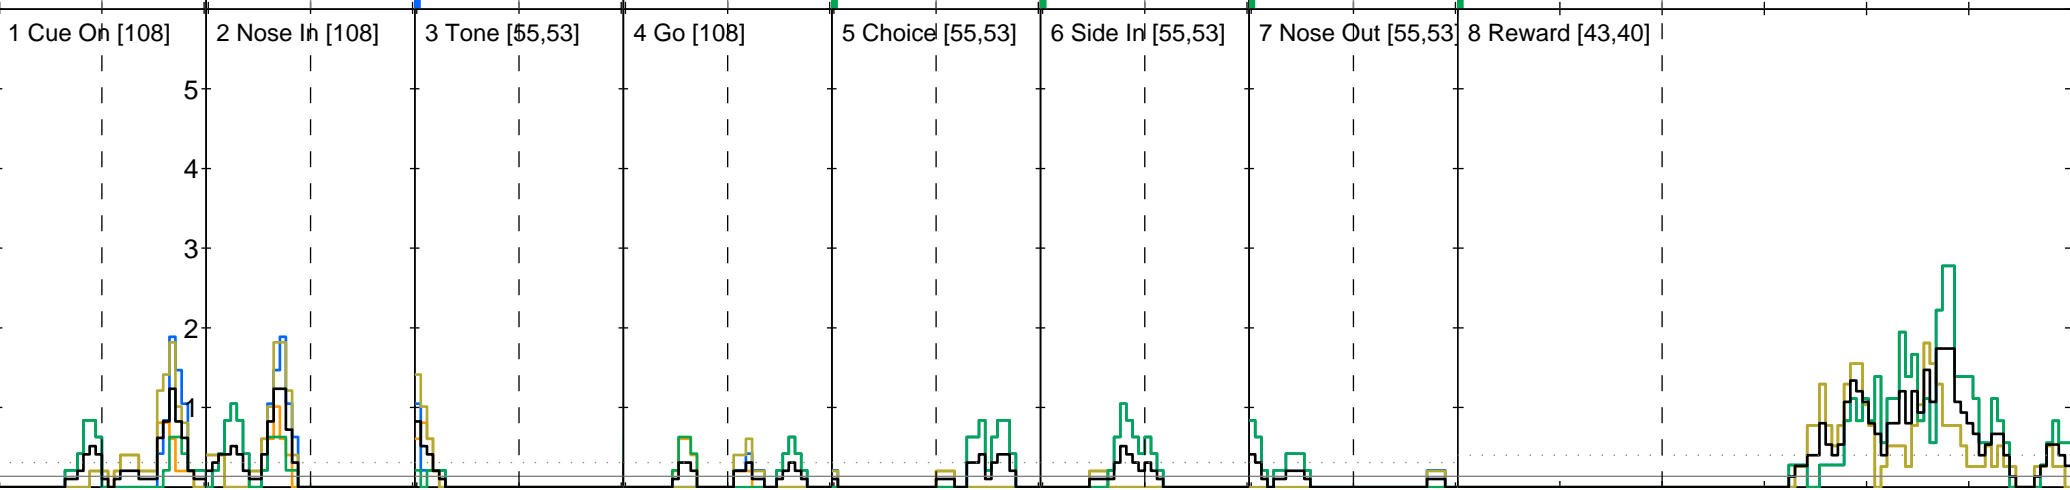



Cell: C1220071024T05d

AP: 1.4 ML: 2.1 DV: 6.9

w: 4 n: 3657  $P_{ISI>2}$ : 0.89

1/2pw: 374 $\mu$ s p->v: 824 $\mu$ s

$\beta_T$ : NaN  $\beta_D$ : NaN

$\beta_P$ : NaN SI: NaN

Session FR: 0.497 Hz

Pk Ev: None

Pk FR: --

MSN

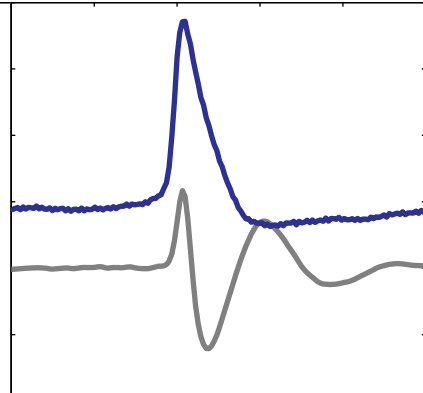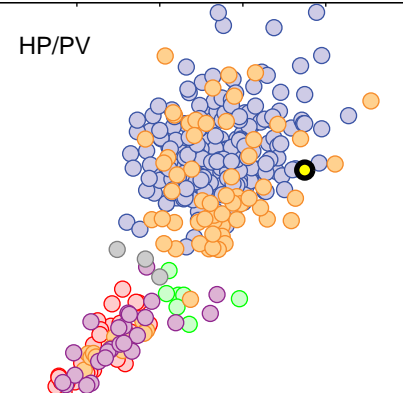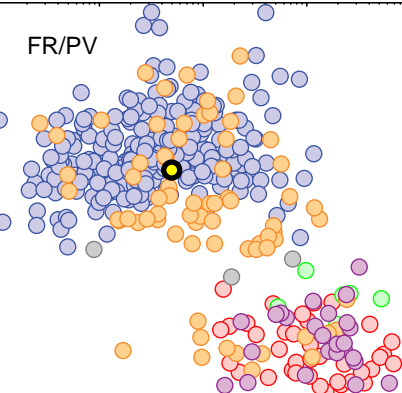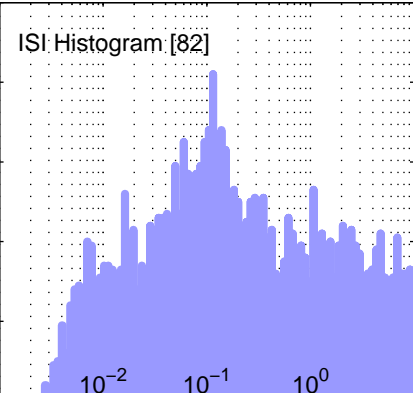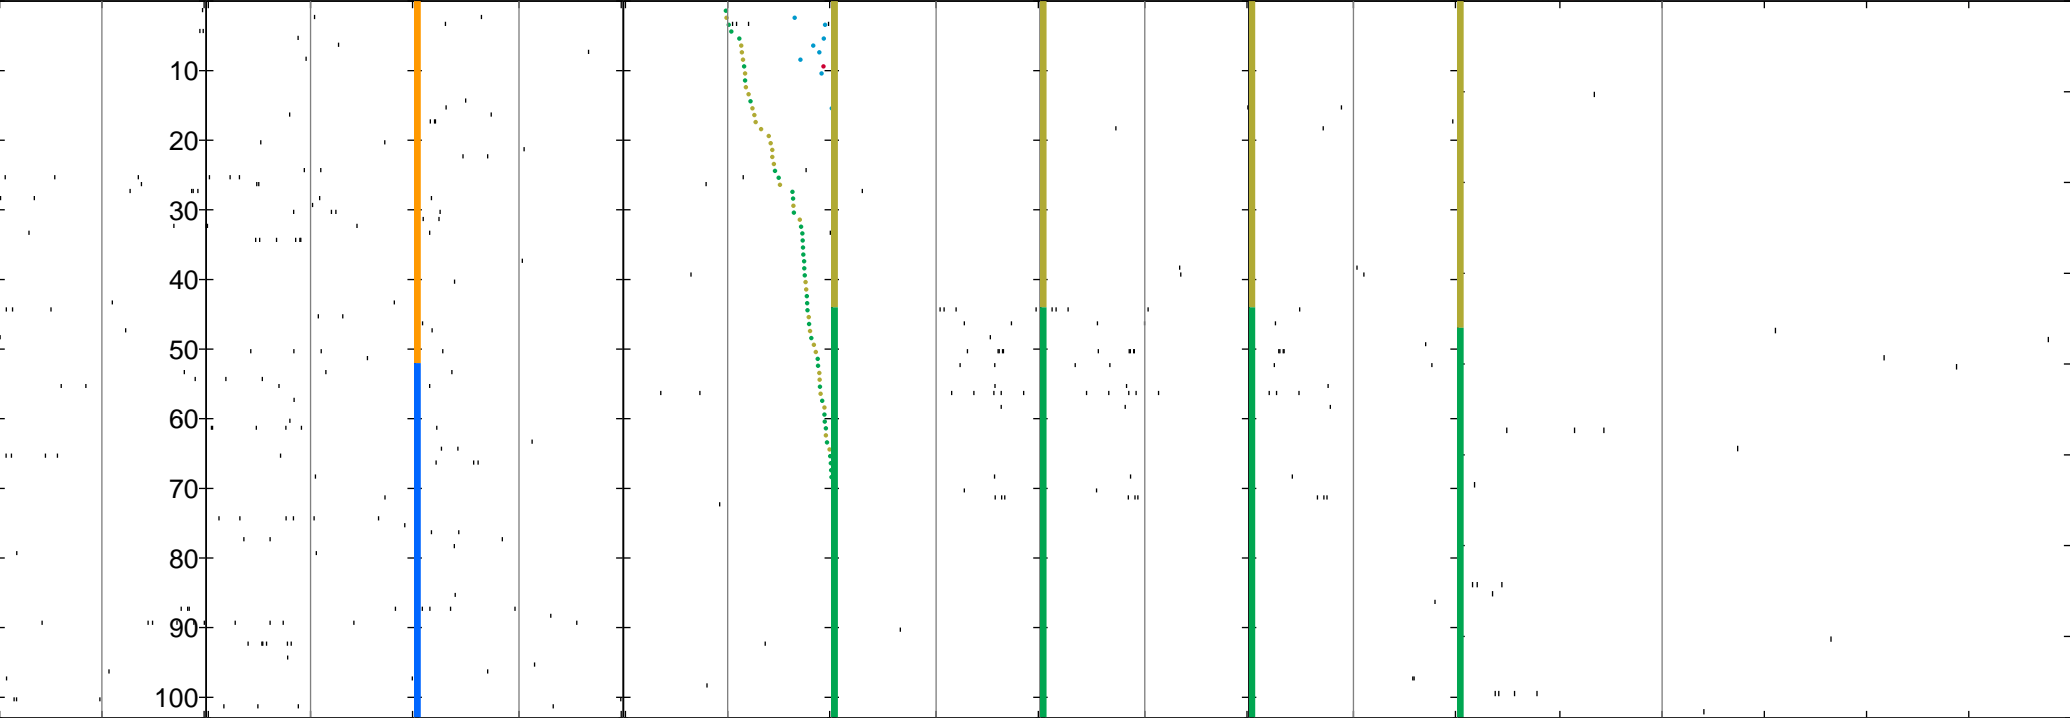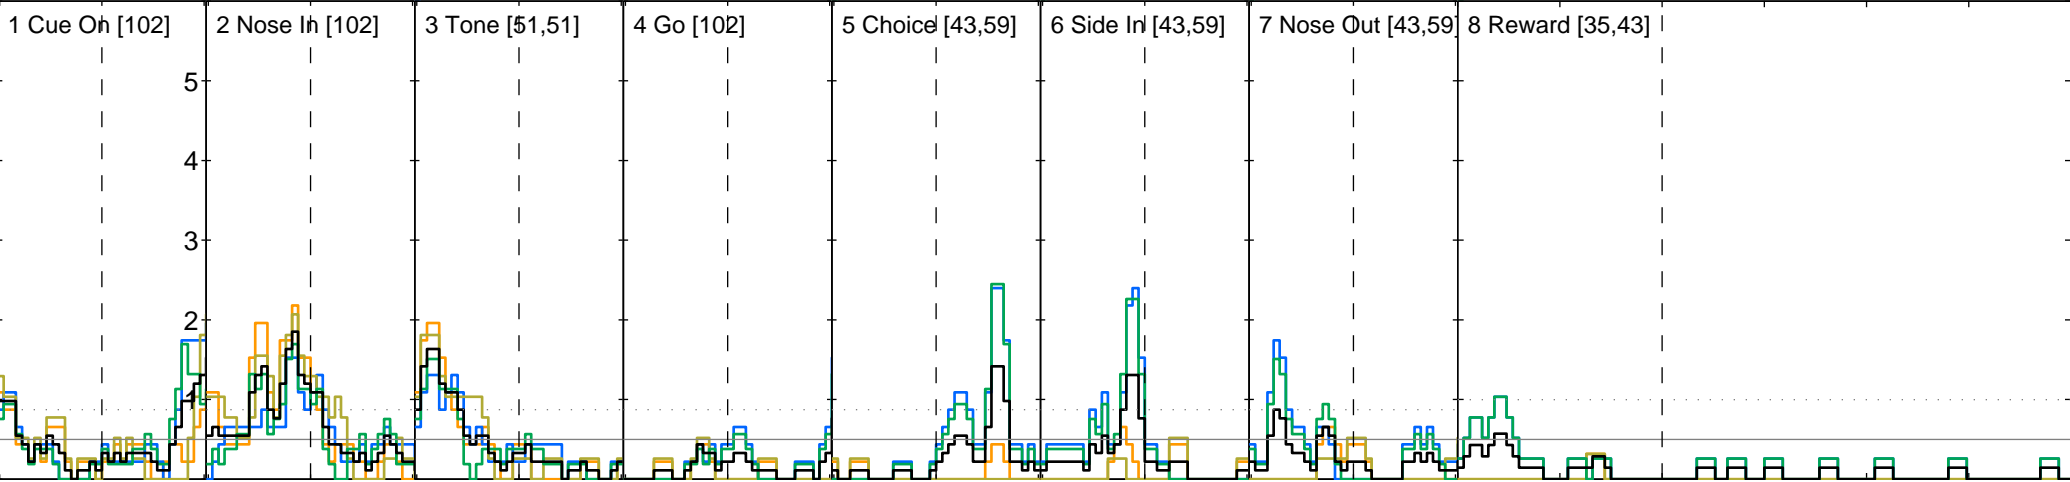

**Cell: C1220071025T05a**

AP: 1.4 ML: 2.1 DV: 6.9

w: 2 n: 5070  $P_{ISI>2}$ : 0.85

1/2pw: 346 $\mu$ s p->v: 1069 $\mu$ s

$\beta_T$ : NaN  $\beta_D$ : NaN

$\beta_P$ : NaN SI: NaN

Session FR: 0.763 Hz

Pk Ev: None

Pk FR: --

MSN

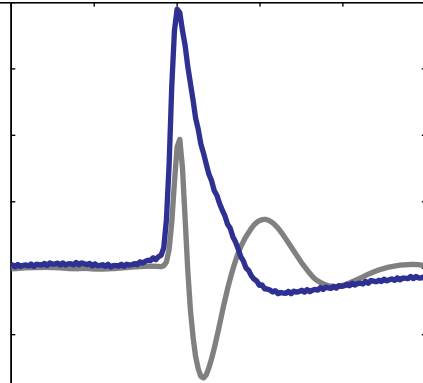

HP/PV

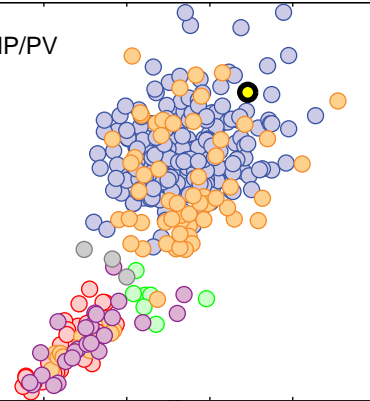

FR/PV

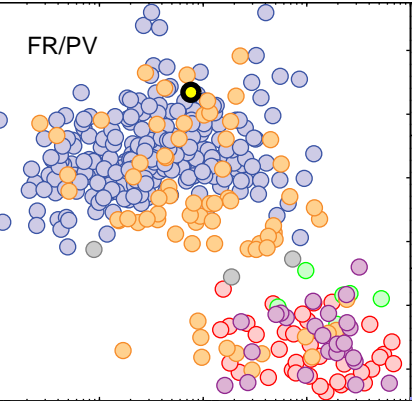

ISI Histogram [119]

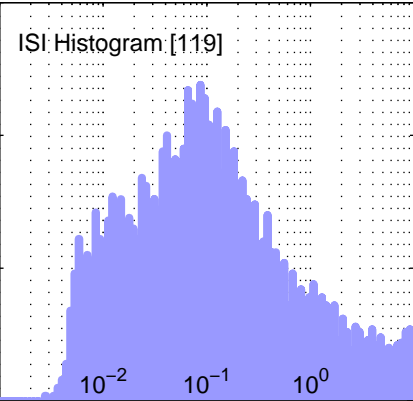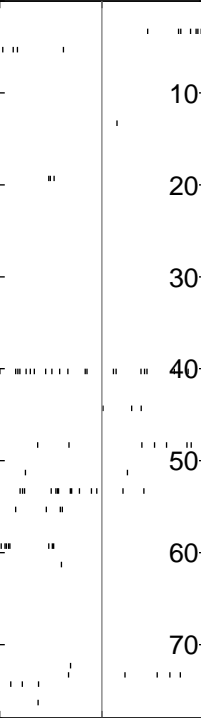

1 Cue On [77]

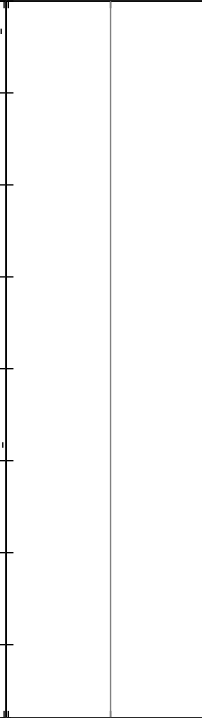

2 Nose In [77]

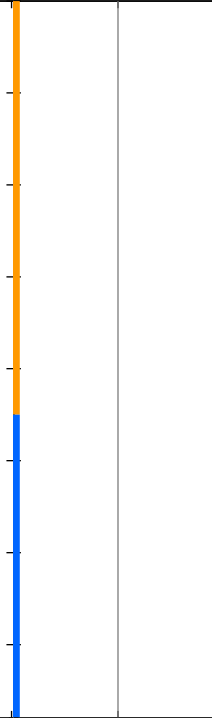

3 Tone [44,33]

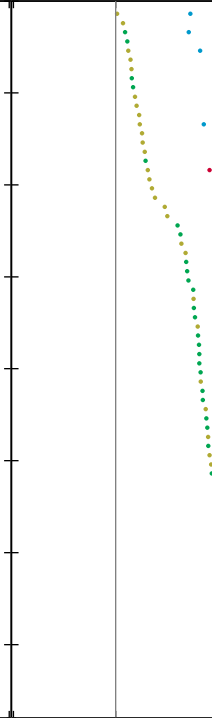

4 Go [77]

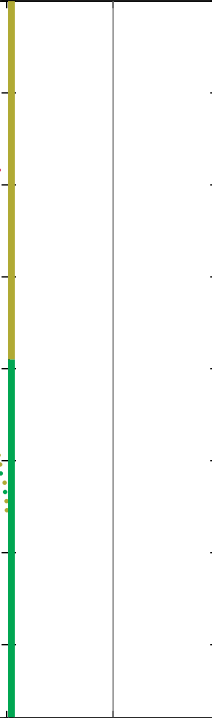

5 Choice [38,39]

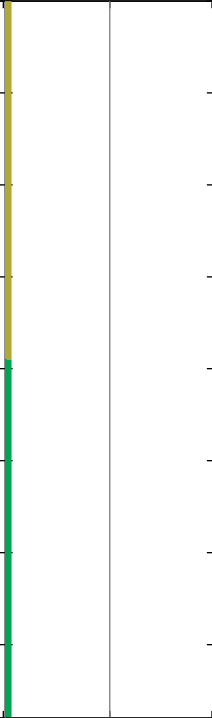

6 Side In [38,39]

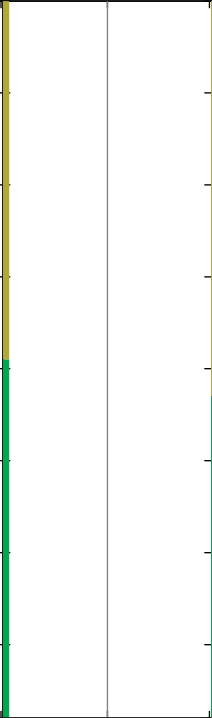

7 Nose Out [38,39]

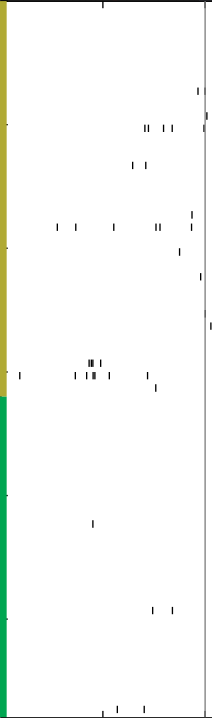

8 Reward [31,26]

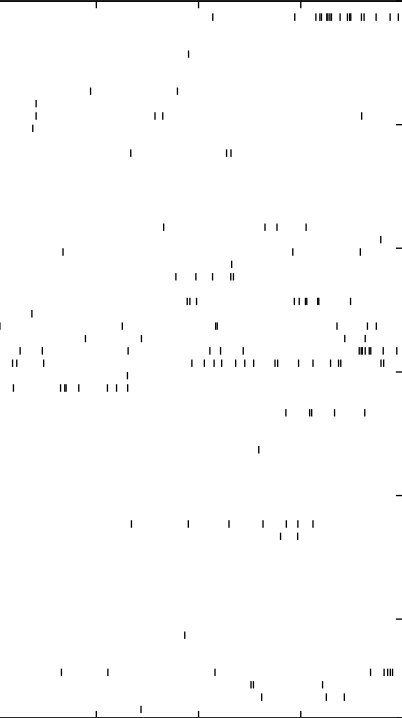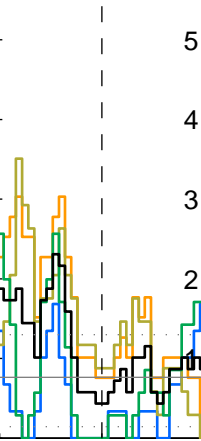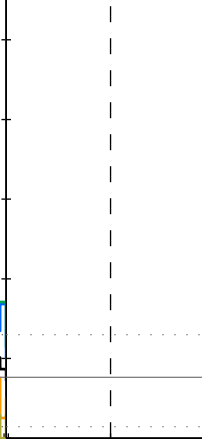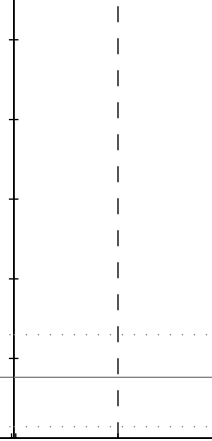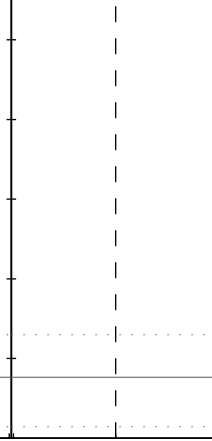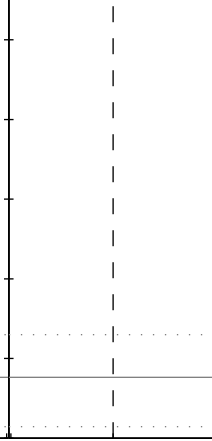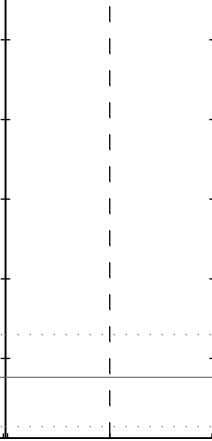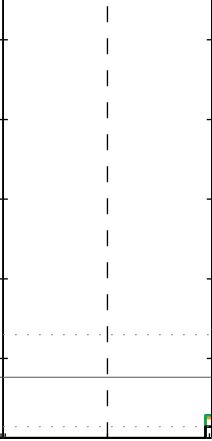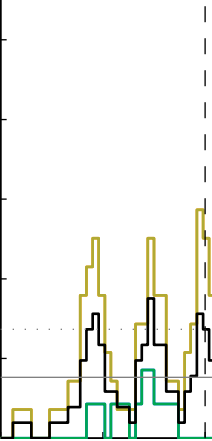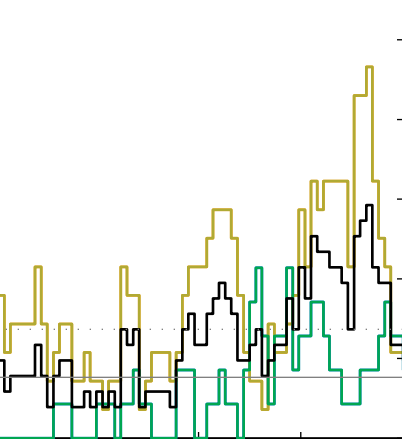

**Cell: C1220071025T05b**

AP: 1.4 ML: 2.1 DV: 6.9  
w: 3 n: 1435  $P_{ISI>2}$ : 0.94  
1/2pw: 288 $\mu$ s p->v: 742 $\mu$ s  
 $\beta_T$ : NaN  $\beta_D$ : NaN  
 $\beta_P$ : NaN SI: NaN  
Session FR: 0.215 Hz  
Pk Ev: None  
Pk FR: --

MSN

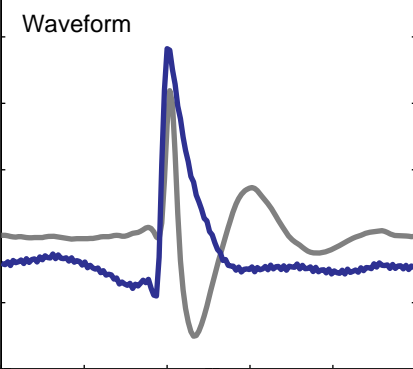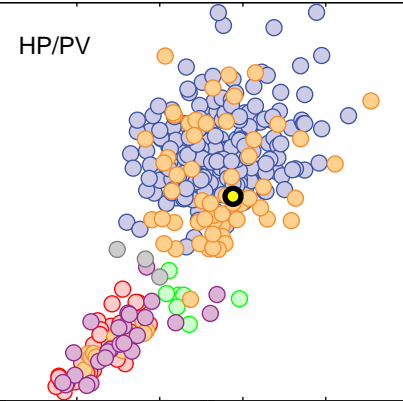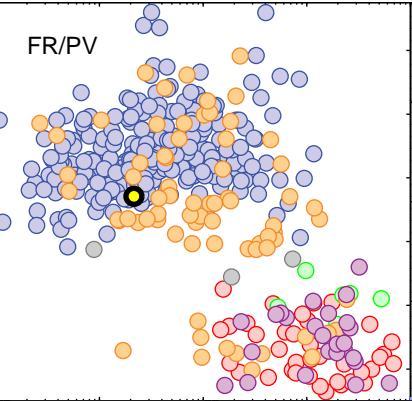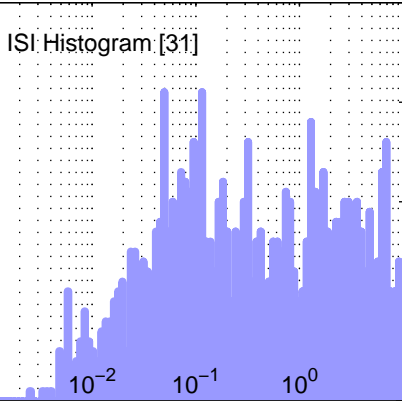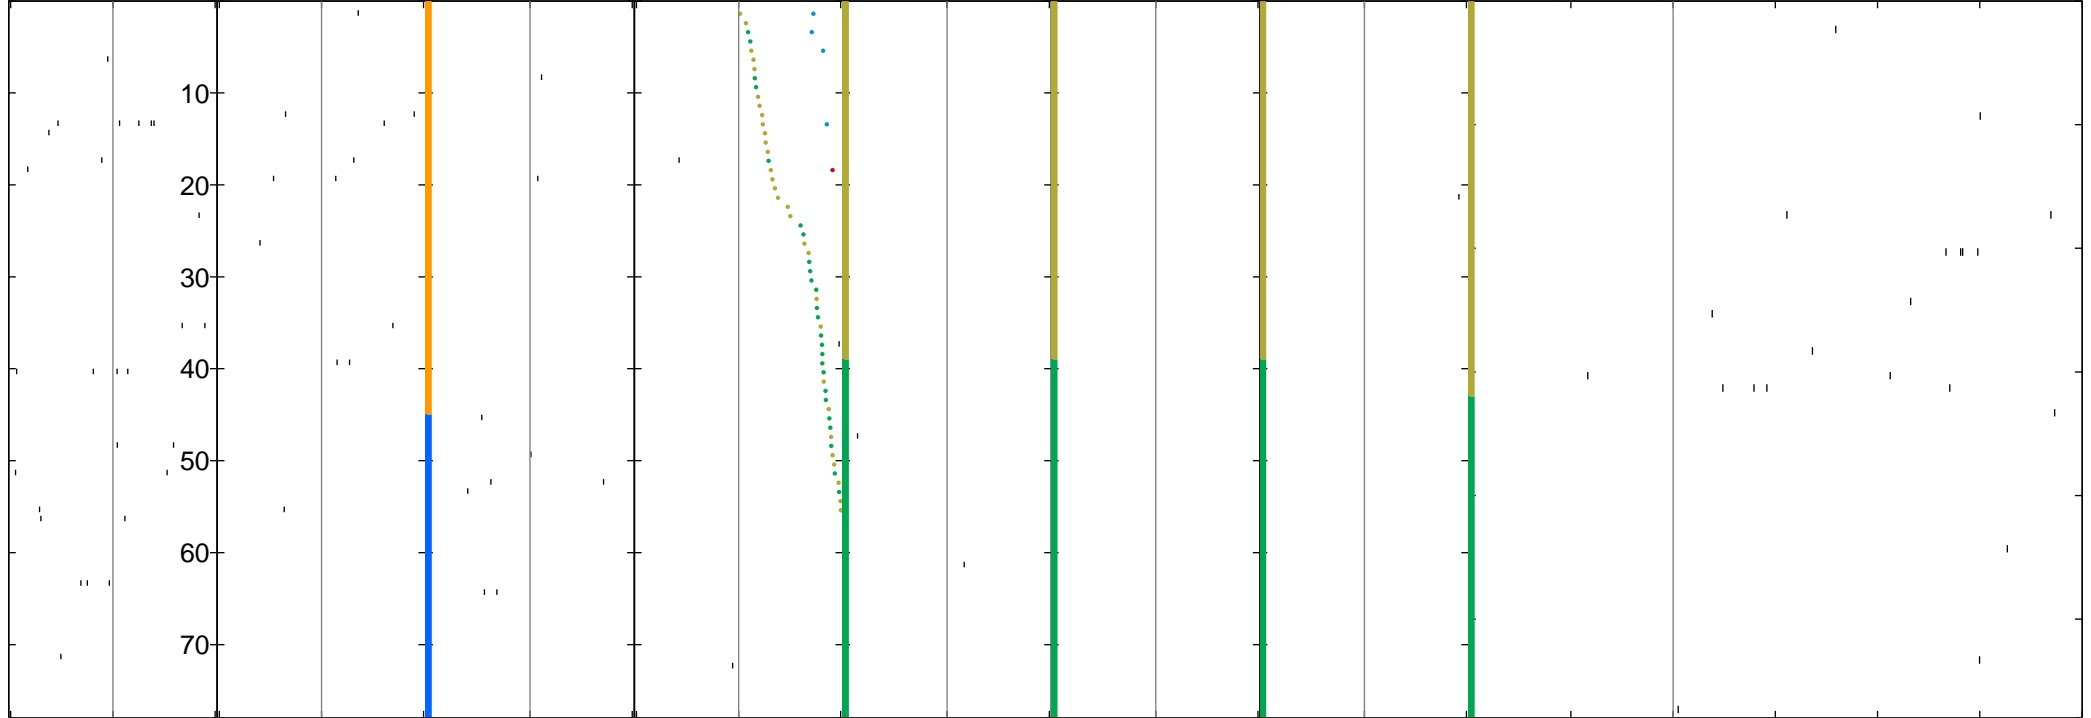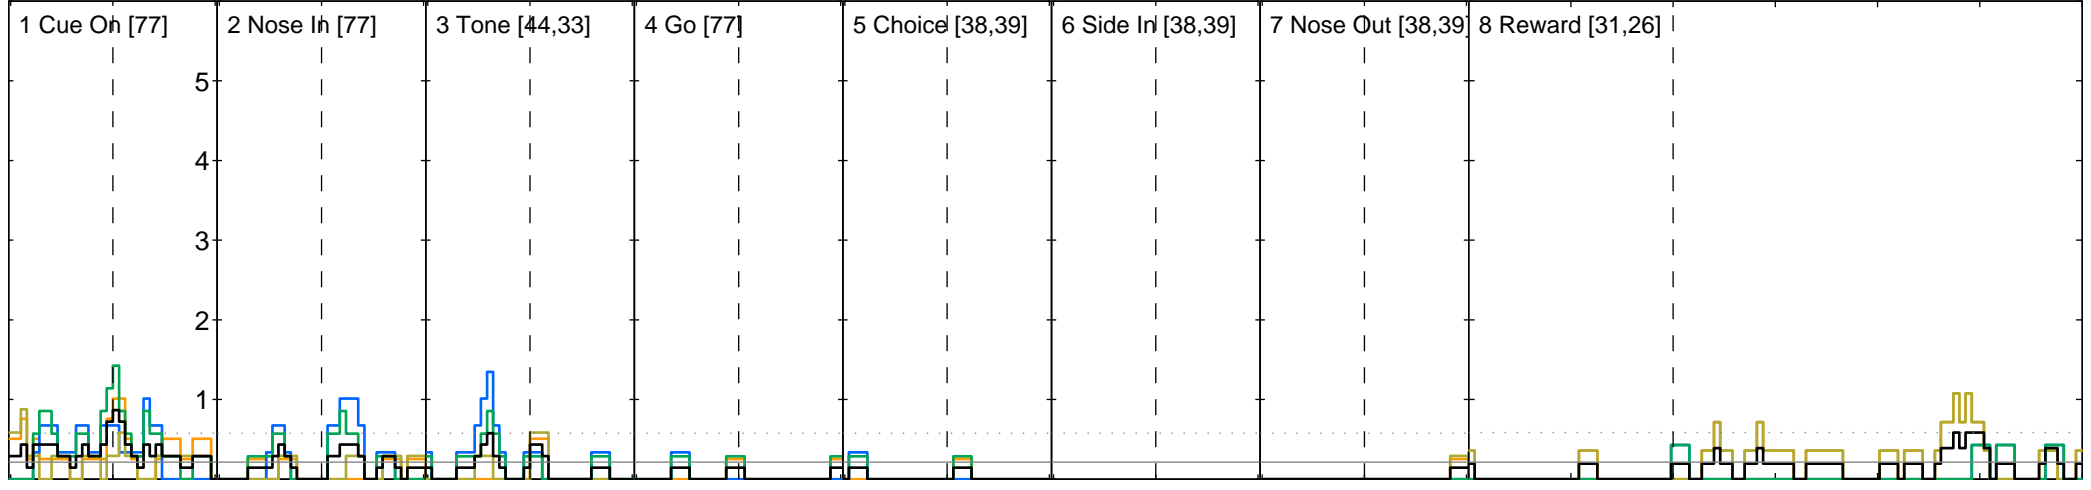

**Cell: C1220071117T05a**

AP: 1.4 ML: 2.1 DV: 7.5  
w: 2 n: 70  $P_{ISI>2}$ : 1  
1/2pw: 168 $\mu$ s p->v: 830 $\mu$ s  
 $\beta_T$ : NaN  $\beta_D$ : NaN  
 $\beta_P$ : NaN SI: NaN  
Session FR: 0.00688 Hz  
Pk Ev: None  
Pk FR: --

MSN

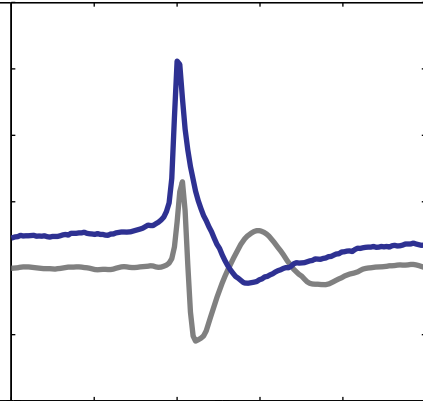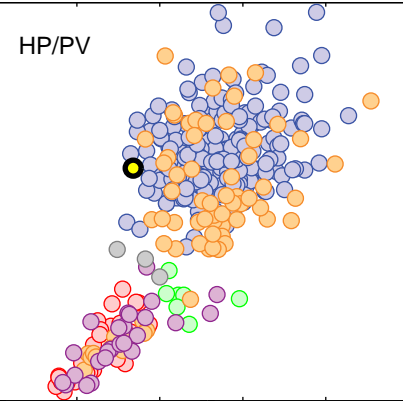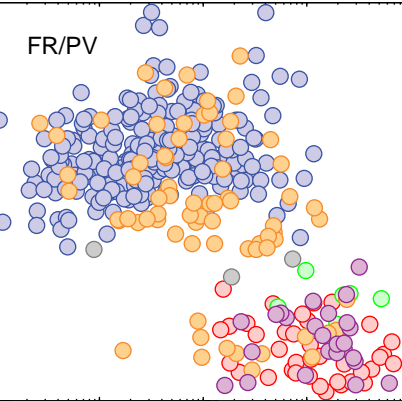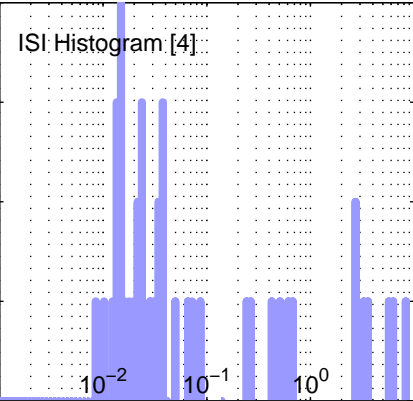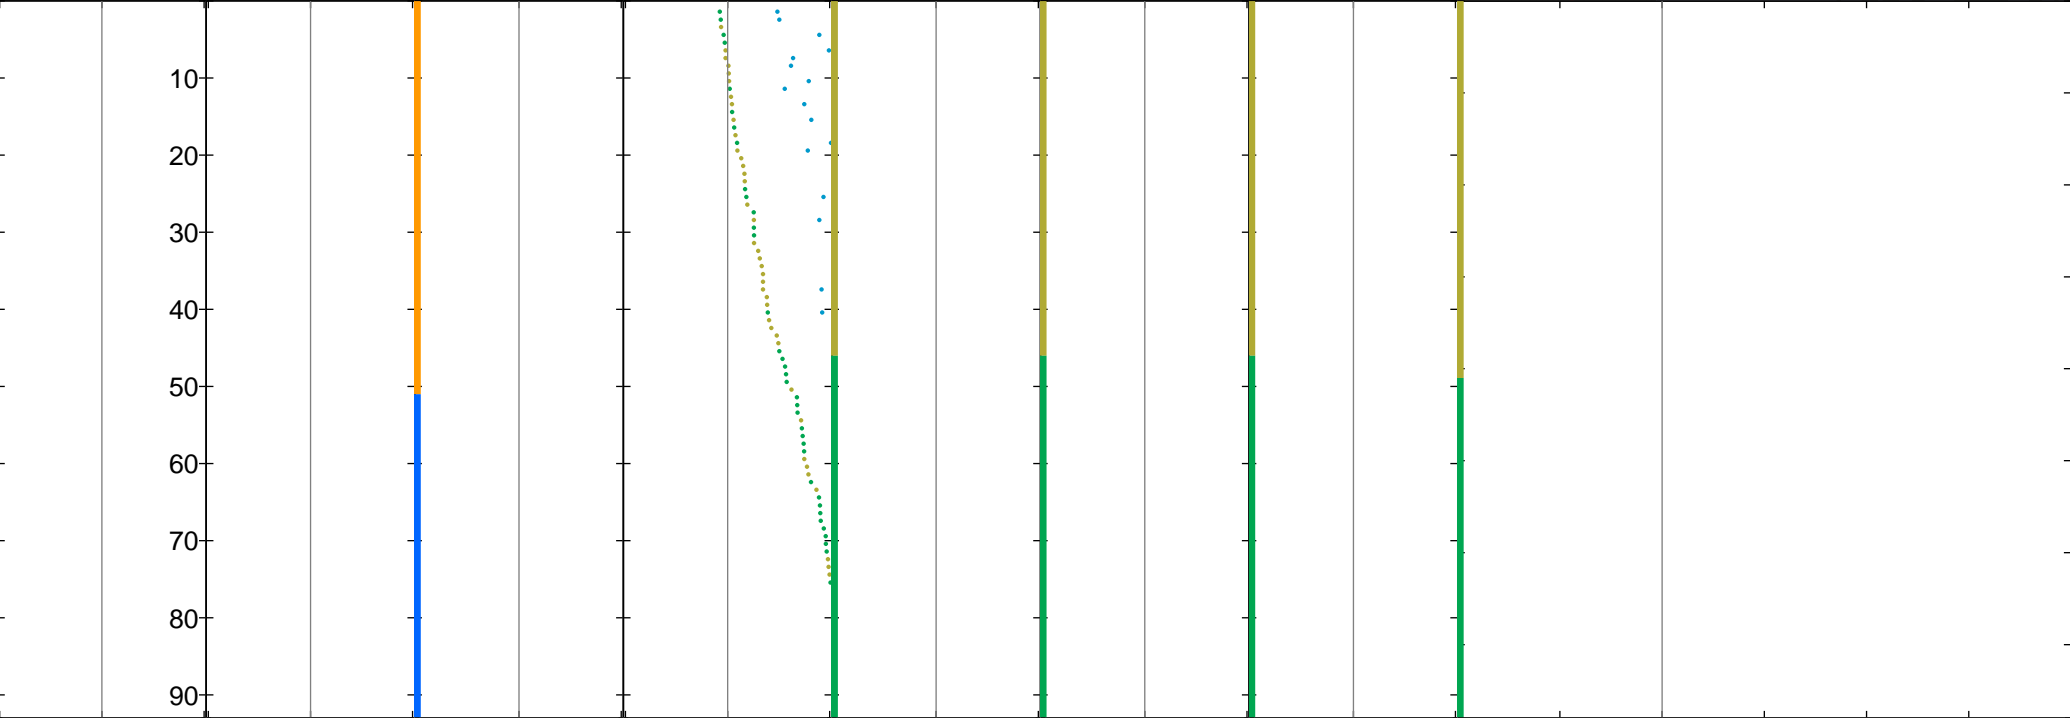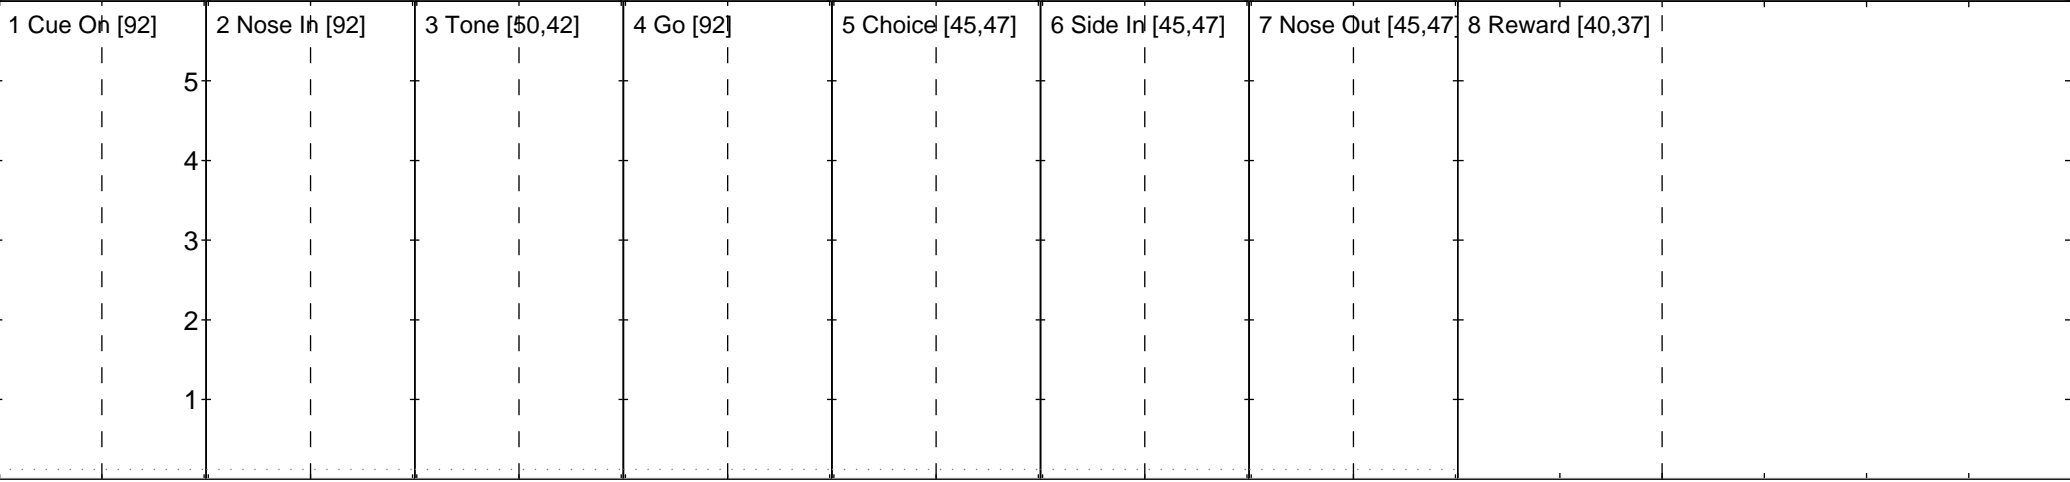

**Cell: C1220071117T06a**

AP: 1.8 ML: 2.5 DV: 6  
w: 3 n: 1452  $P_{ISI>2}$ : 0.98  
1/2pw: 235 $\mu$ s p->v: 926 $\mu$ s  
 $\beta_T$ : NaN  $\beta_D$ : NaN  
 $\beta_P$ : NaN SI: NaN  
Session FR: 0.143 Hz  
Pk Ev: None  
Pk FR: --

**MSN**

Waveform

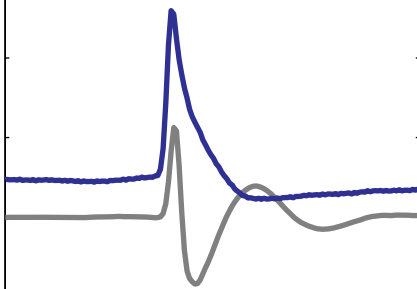

HP/PV

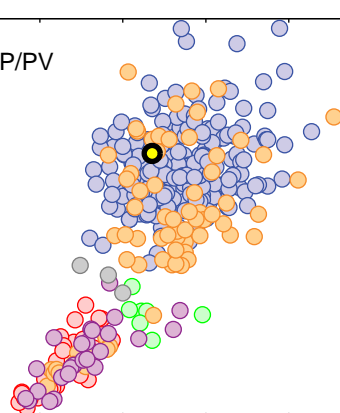

FR/PV

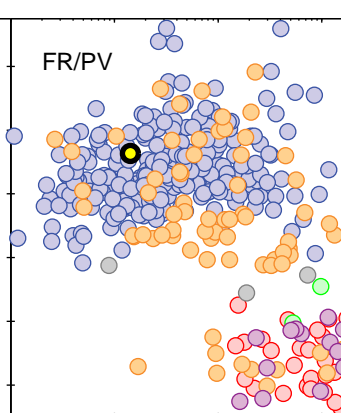

ISI Histogram [34]

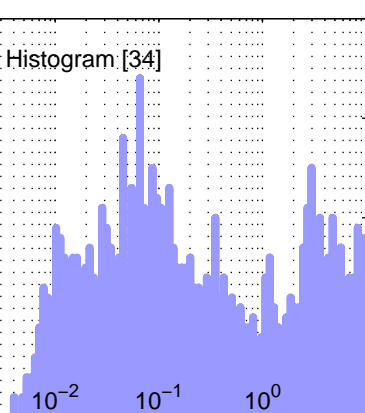10  
20  
30  
40  
50  
60  
70  
80  
90

1 Cue On [92] 2 Nose In [92] 3 Tone [50,42] 4 Go [92] 5 Choice [45,47] 6 Side In [45,47] 7 Nose Out [45,47] 8 Reward [40,37]

5  
4  
3  
2  
1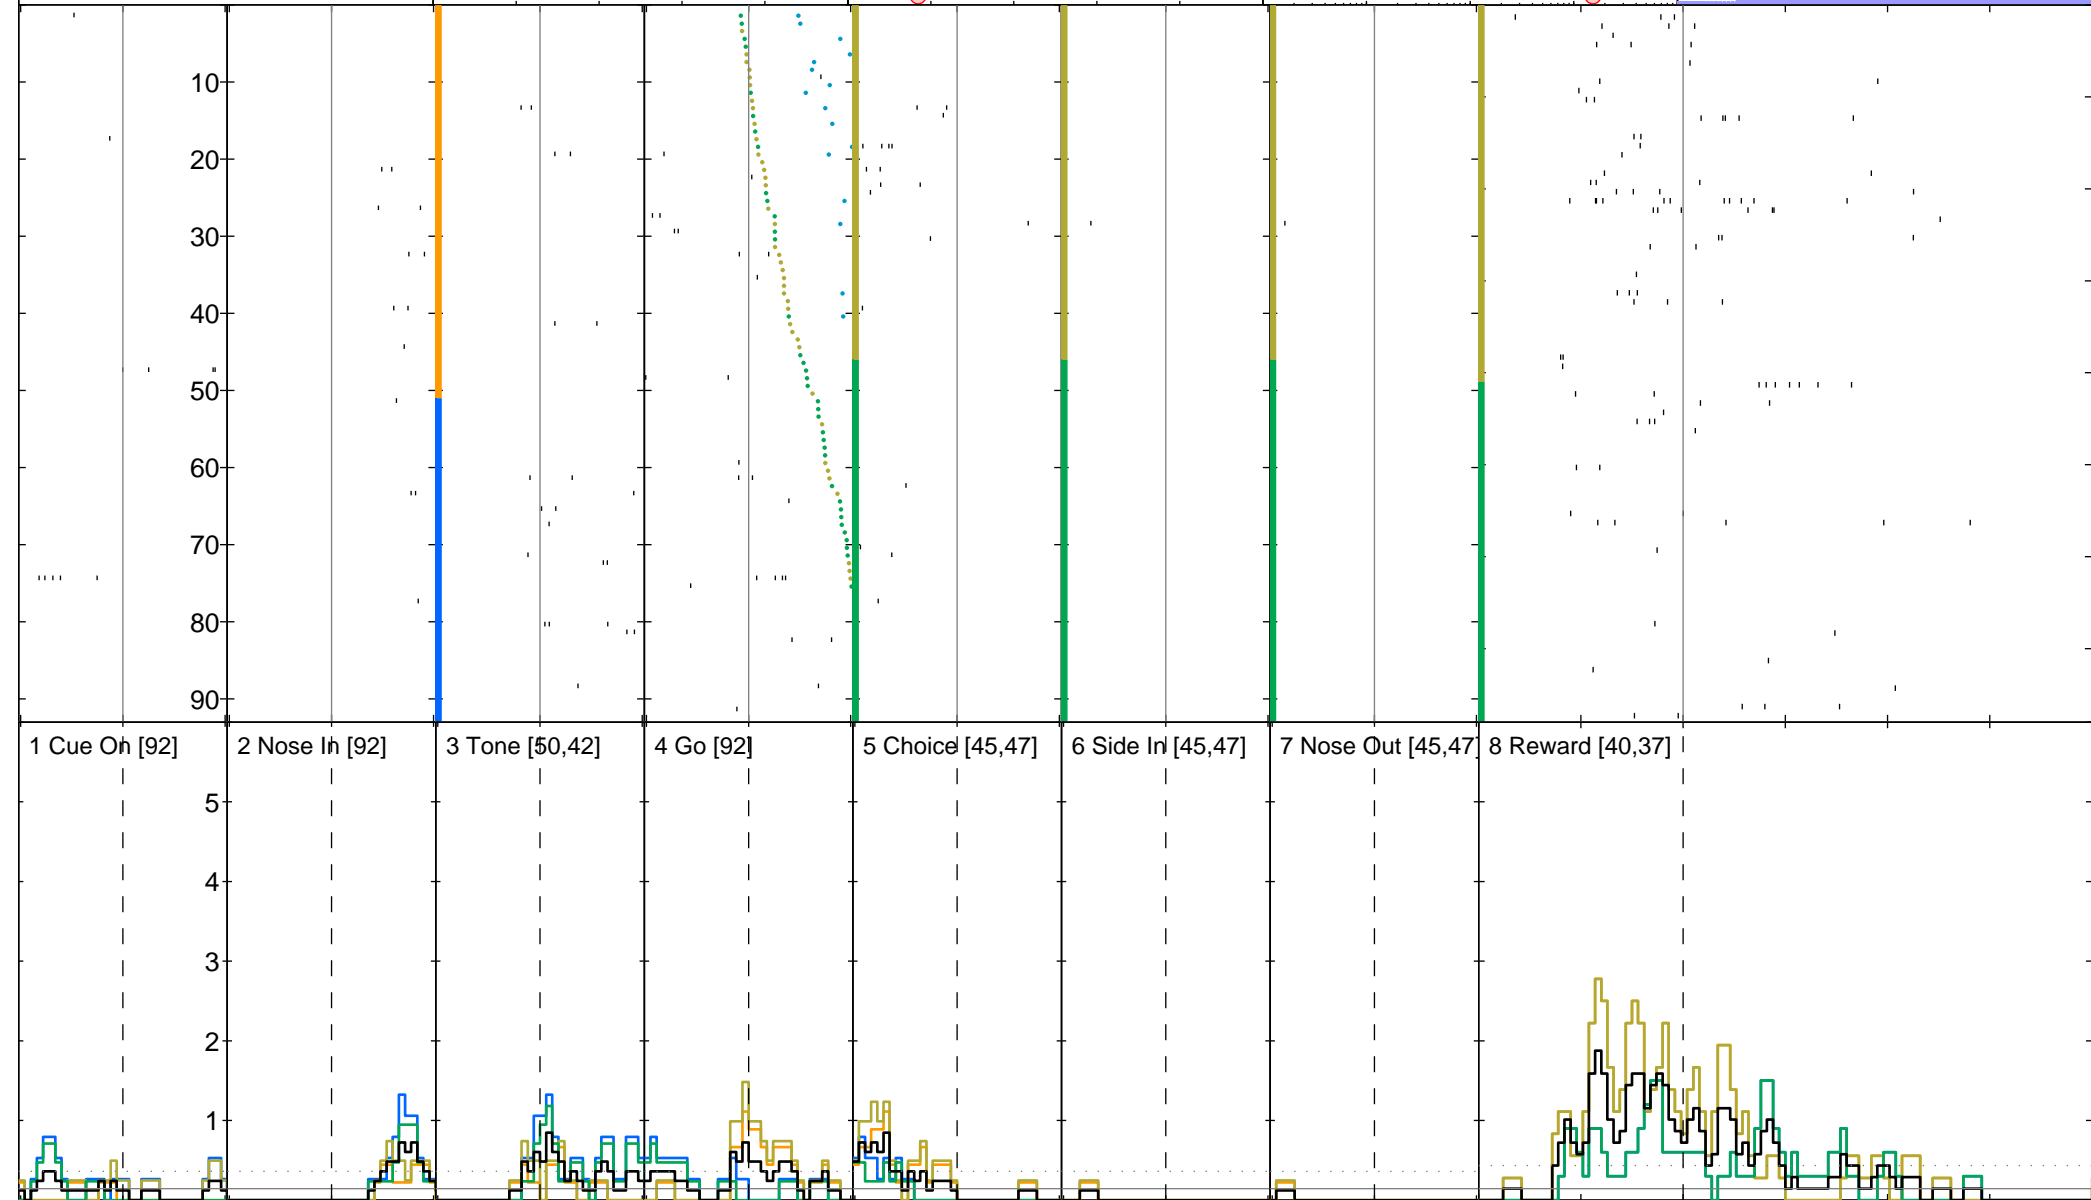

**Cell: C1220071125T05a**

AP: 1.4 ML: 2.1 DV: 8  
w: 2 n: 289  $P_{ISI>2}$ : 0.99  
1/2pw: 246 $\mu$ s p->v: 667 $\mu$ s  
 $\beta_T$ : NaN  $\beta_D$ : NaN  
 $\beta_P$ : NaN SI: NaN  
Session FR: 0.0507 Hz  
Pk Ev: None  
Pk FR: --

MSN

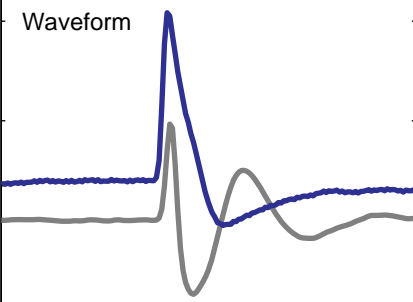

HP/PV

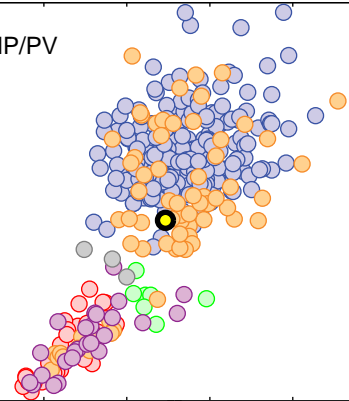

FR/PV

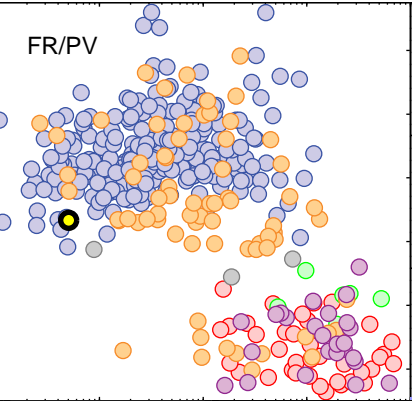

ISI Histogram [11]

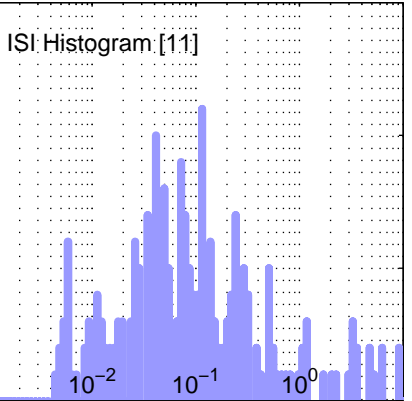

10  
20  
30  
40  
50  
60  
70  
80  
90  
100

1 Cue On [107] 2 Nose In [107] 3 Tone [55,52] 4 Go [107] 5 Choice [63,44] 6 Side In [63,44] 7 Nose Out [63,44] 8 Reward [46,35]

5  
4  
3  
2  
1

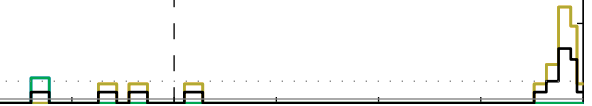

**Cell: C1220071022T05b**

AP: 1.4 ML: 2.1 DV: 6.7  
w: 3 n: 513  $P_{ISI>2}$ : 0.98  
1/2pw: 269 $\mu$ s p->v: 851 $\mu$ s  
 $\beta_T$ : NaN  $\beta_D$ : NaN  
 $\beta_P$ : NaN SI: NaN  
Session FR: 0.0869 Hz  
Pk Ev: None  
Pk FR: --

**MSN**

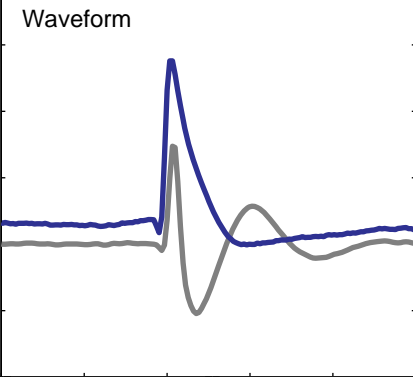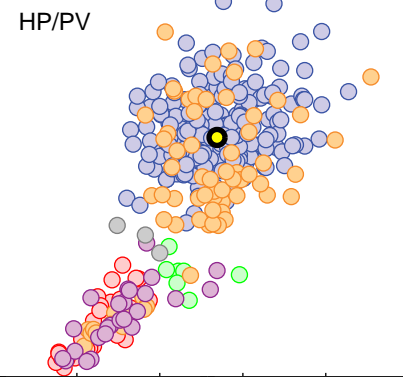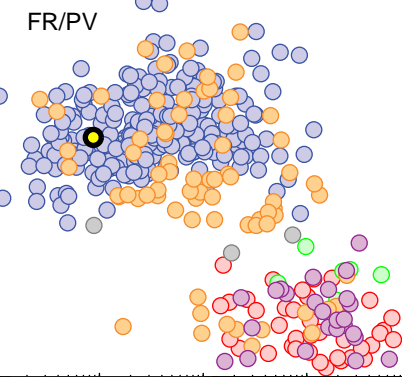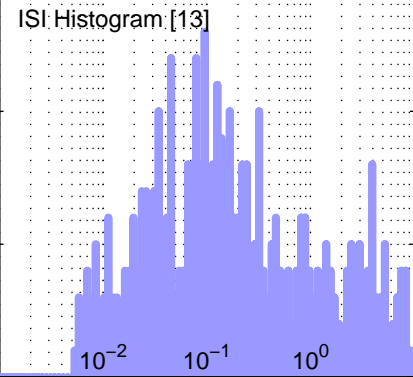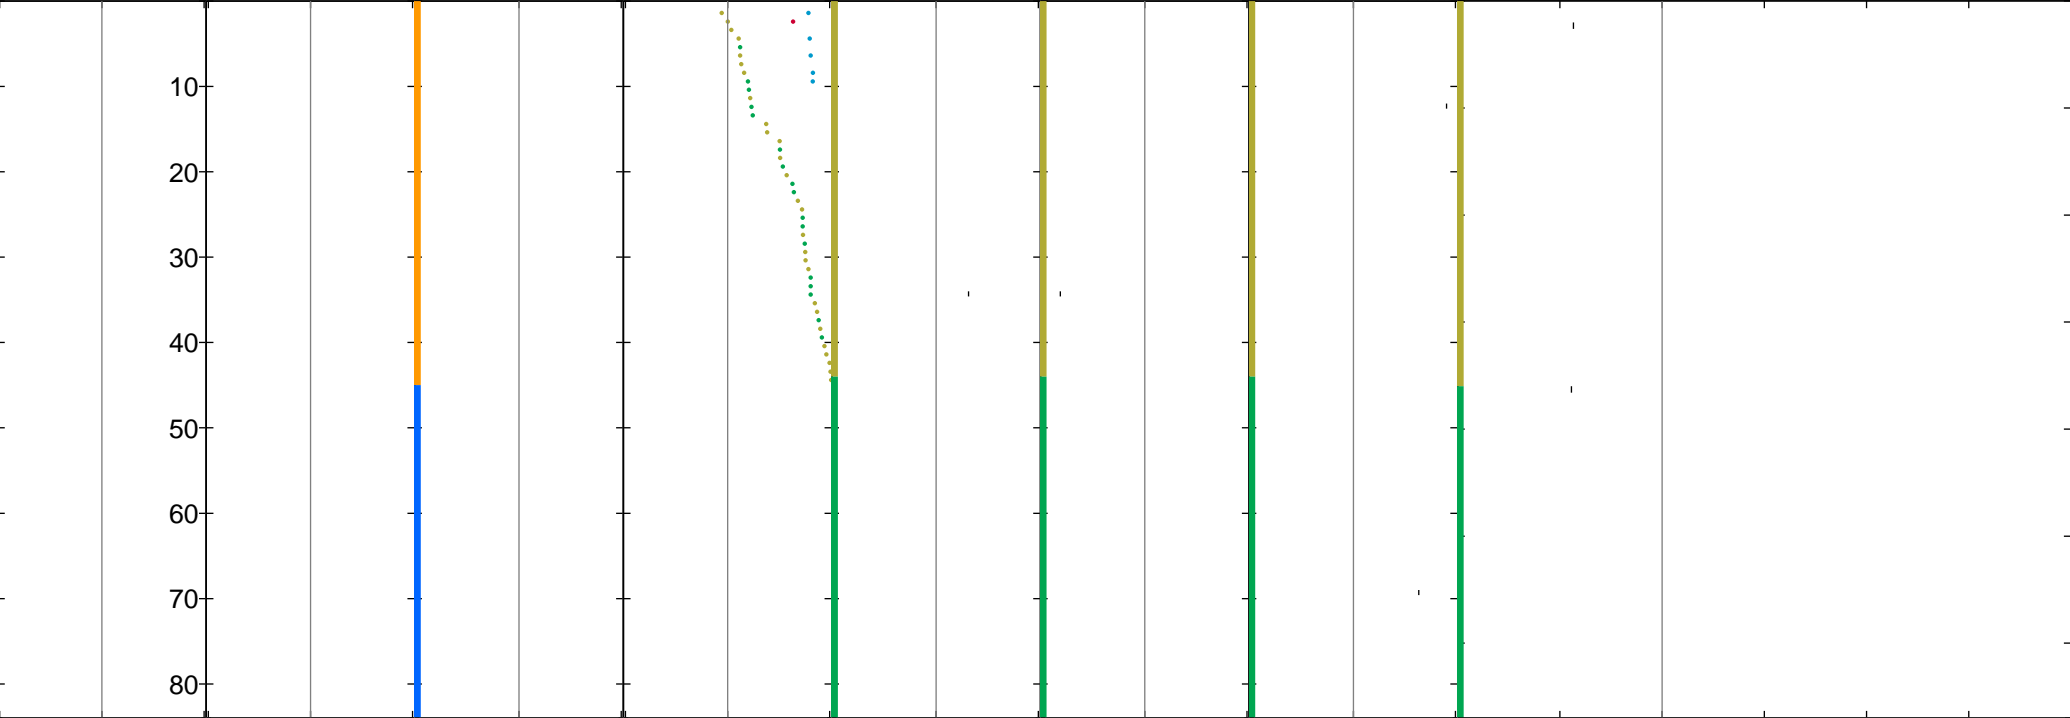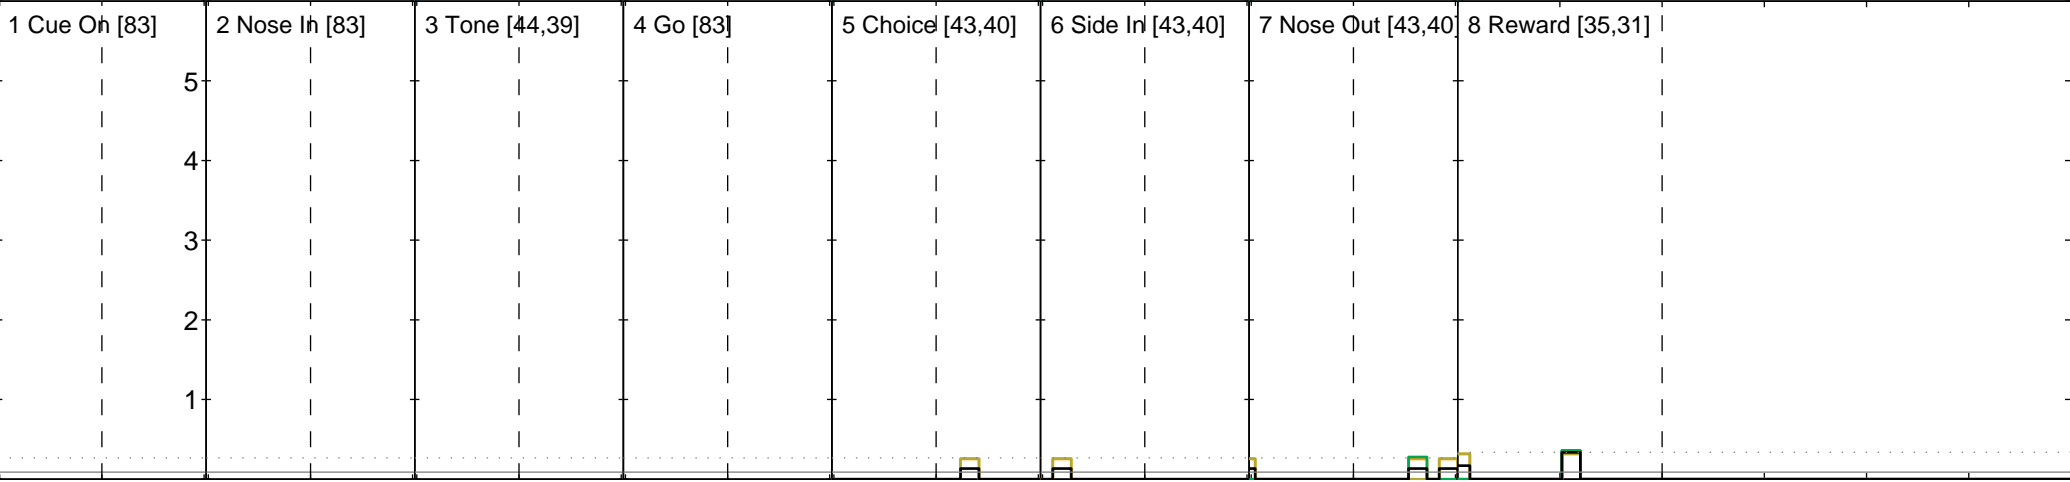

**Cell: C1220071022T05c**

AP: 1.4 ML: 2.1 DV: 6.7  
w: 2 n: 656  $P_{ISI>2}$ : 0.98  
1/2pw: 363 $\mu$ s p->v: 829 $\mu$ s  
 $\beta_T$ : NaN  $\beta_D$ : NaN  
 $\beta_P$ : NaN SI: NaN  
Session FR: 0.111 Hz  
Pk Ev: None  
Pk FR: --

MSN

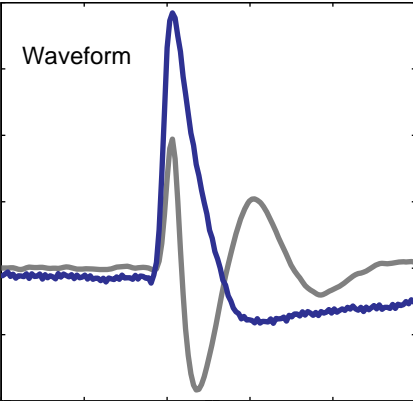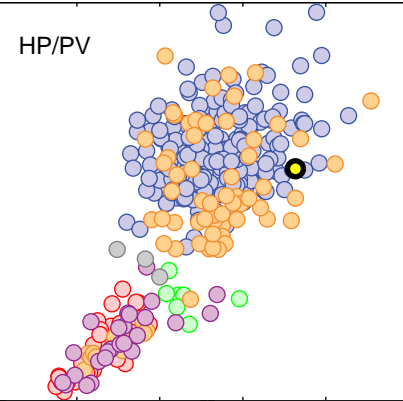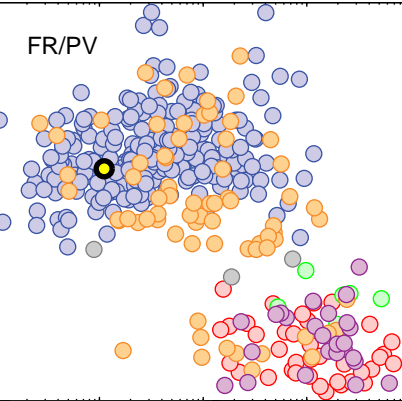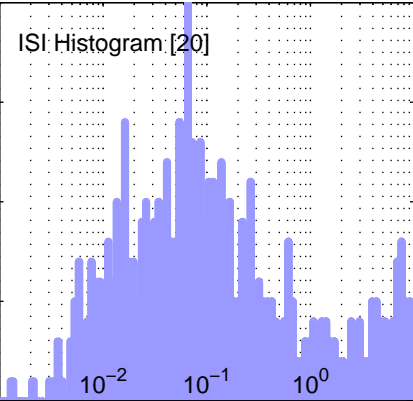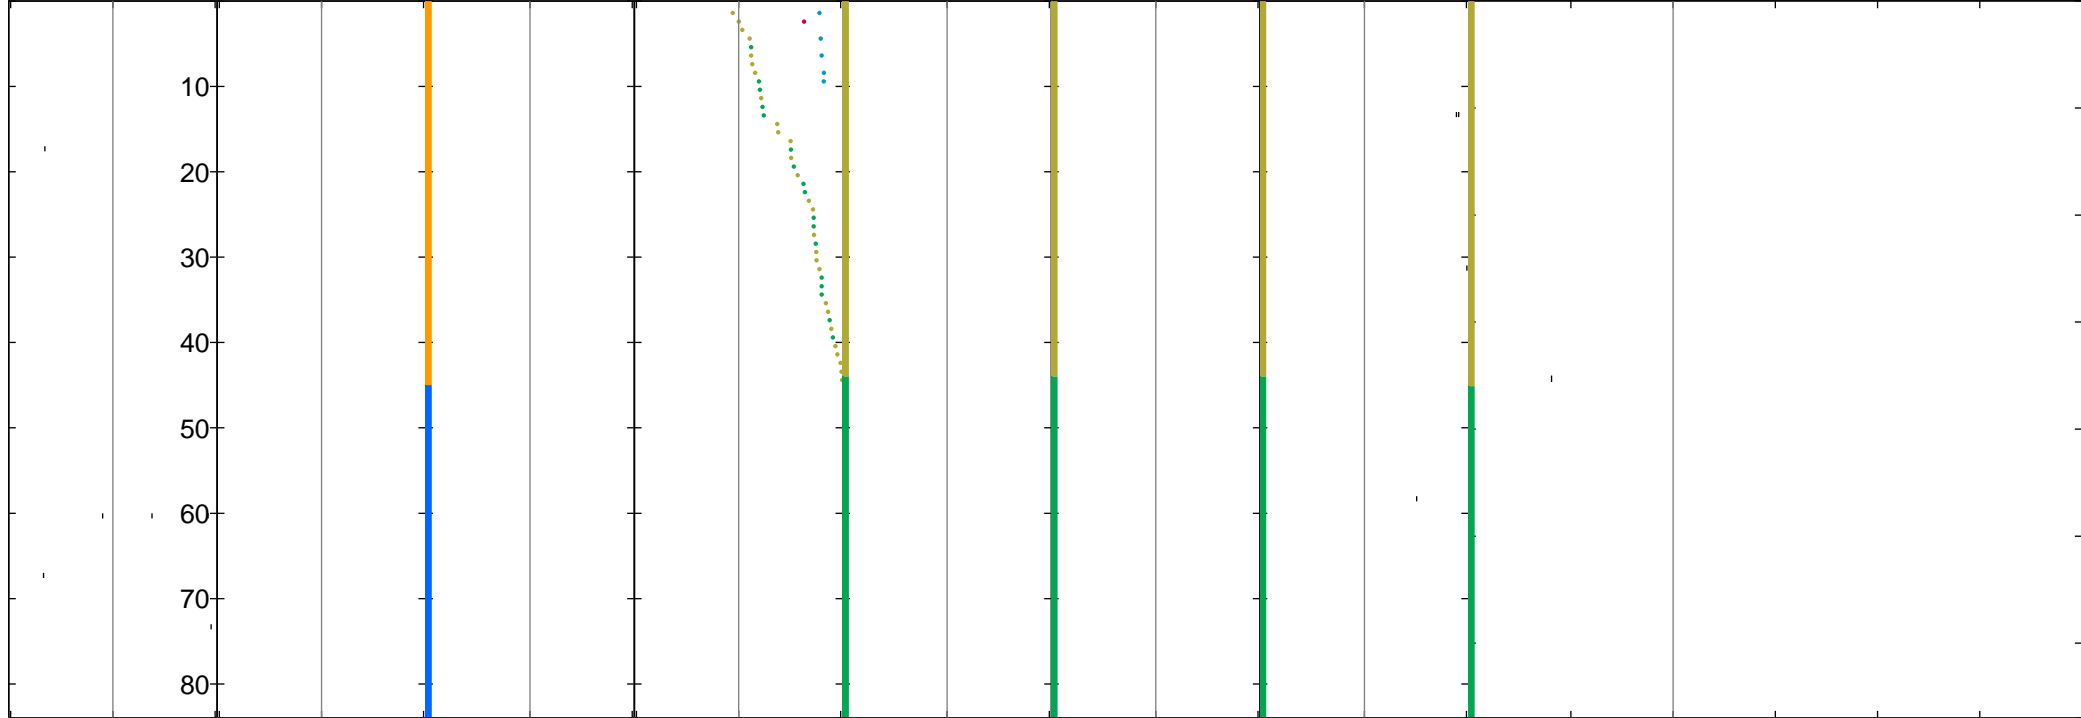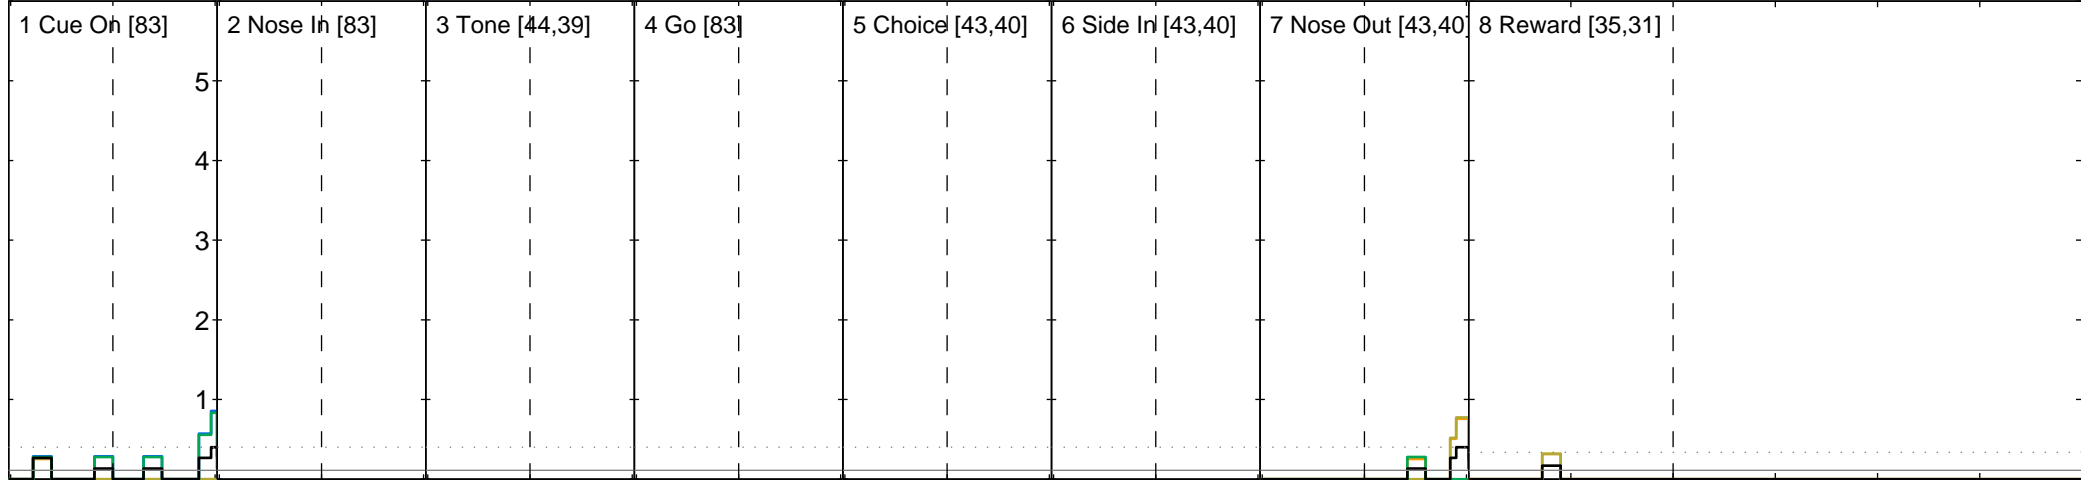



**Cell: C1220071022T05d**

AP: 1.4 ML: 2.1 DV: 6.7  
w: 3 n: 857  $P_{ISI>2}$ : 0.97  
1/2pw: 328 $\mu$ s p->v: 816 $\mu$ s  
 $\beta_T$ : NaN  $\beta_D$ : NaN  
 $\beta_P$ : NaN SI: NaN  
Session FR: 0.145 Hz  
Pk Ev: None  
Pk FR: --

MSN

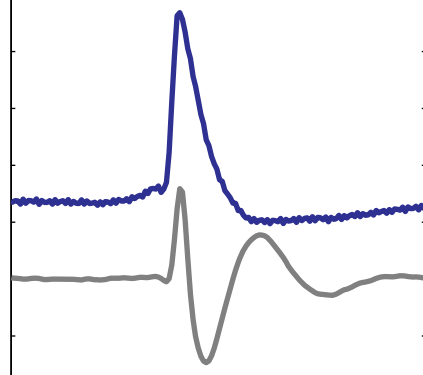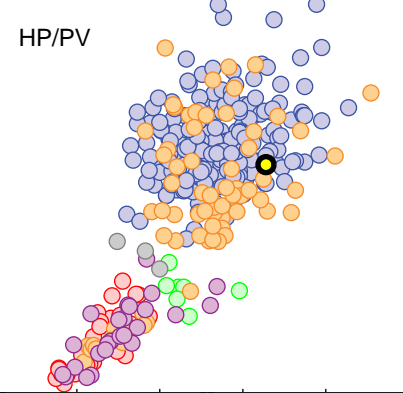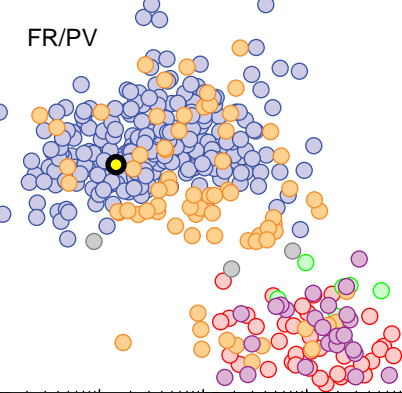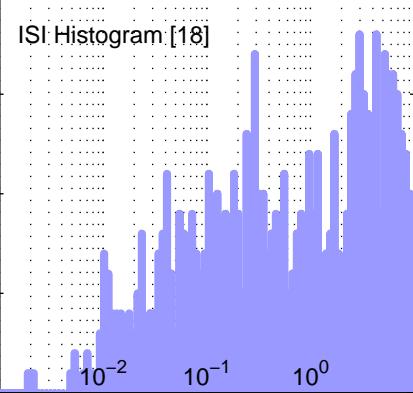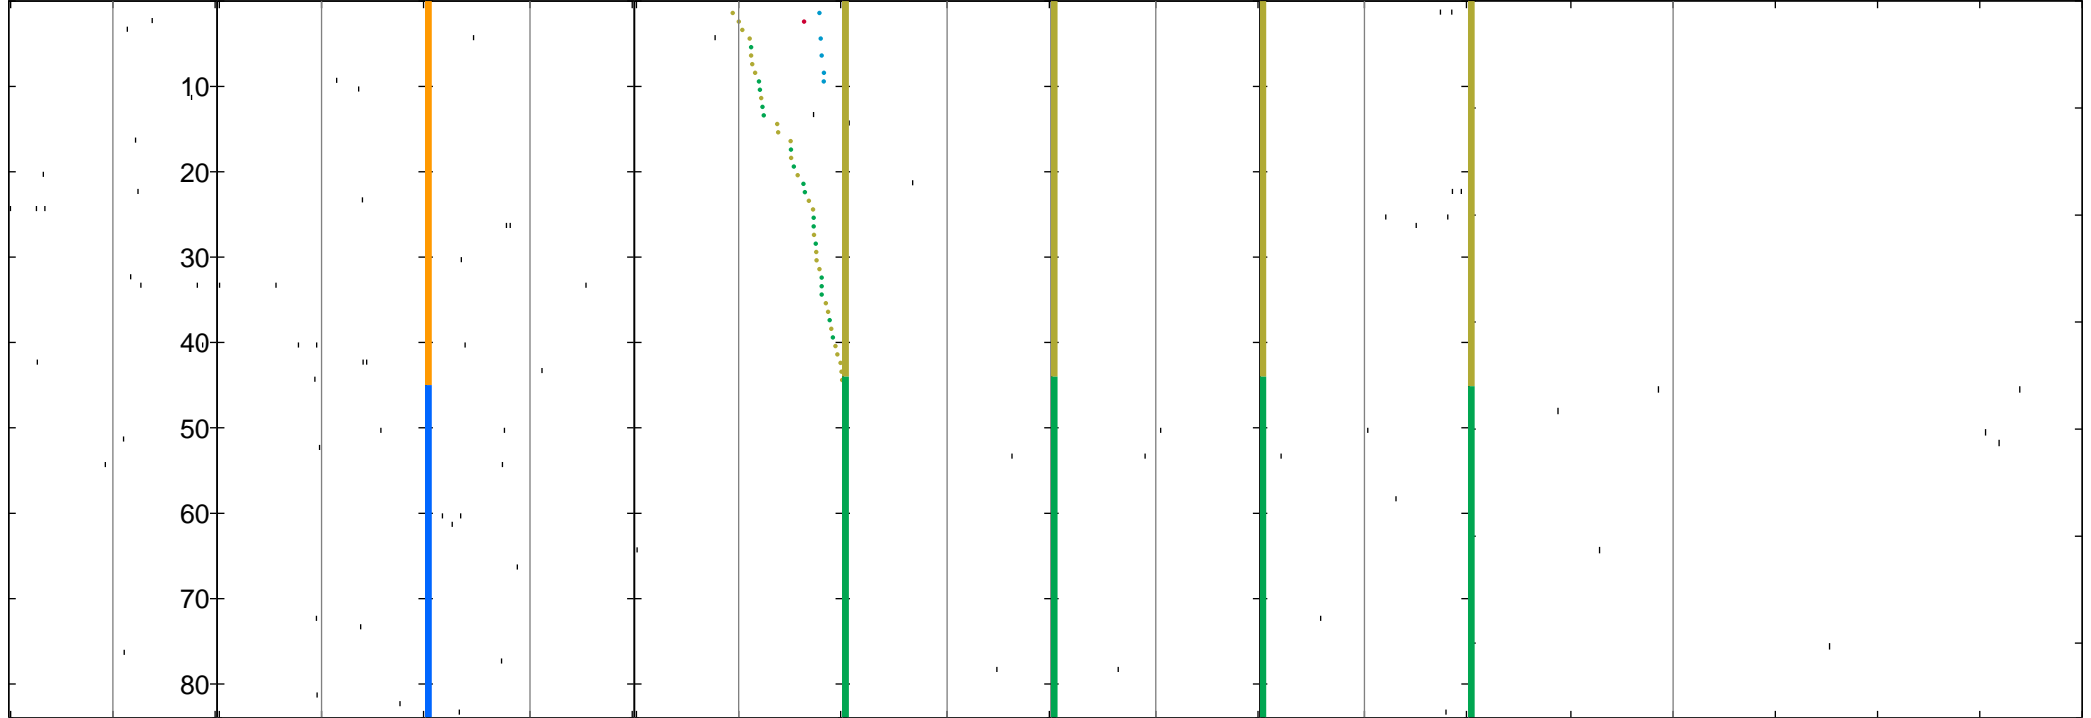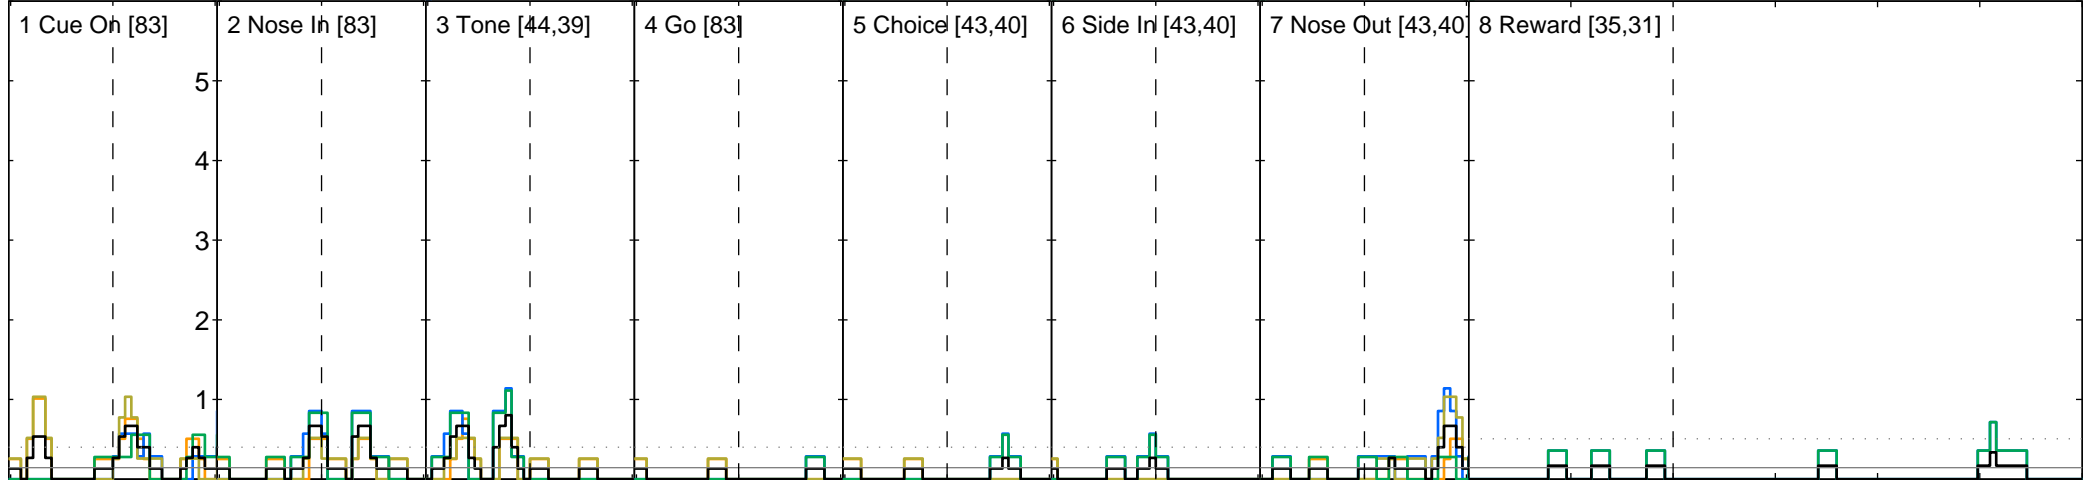

**Cell: C1220071022T05e**

AP: 1.4 ML: 2.1 DV: 6.7  
w: 3 n: 421  $P_{ISI>2}$ : 0.99  
1/2pw: 286 $\mu$ s p->v: 851 $\mu$ s  
 $\beta_T$ : NaN  $\beta_D$ : NaN  
 $\beta_P$ : NaN SI: NaN  
Session FR: 0.0712 Hz  
Pk Ev: None  
Pk FR: --

MSN

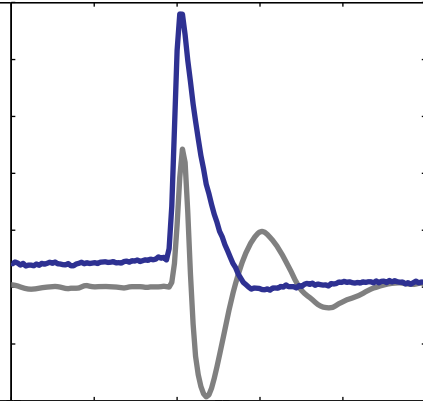

HP/PV

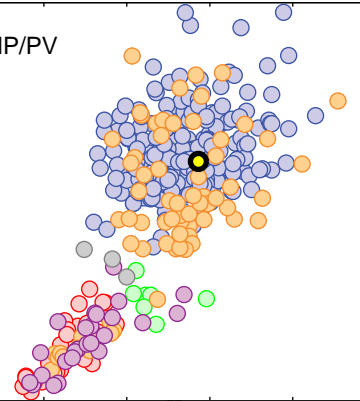

FR/PV

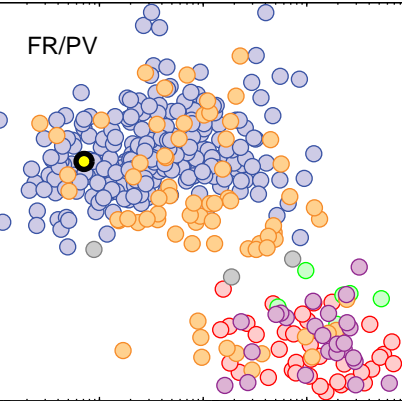

ISI Histogram [12]

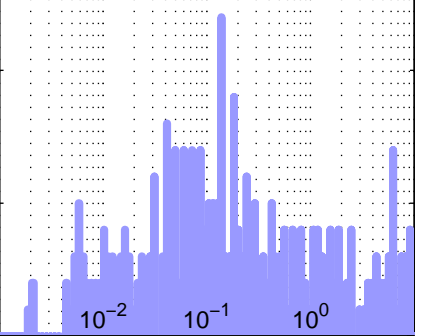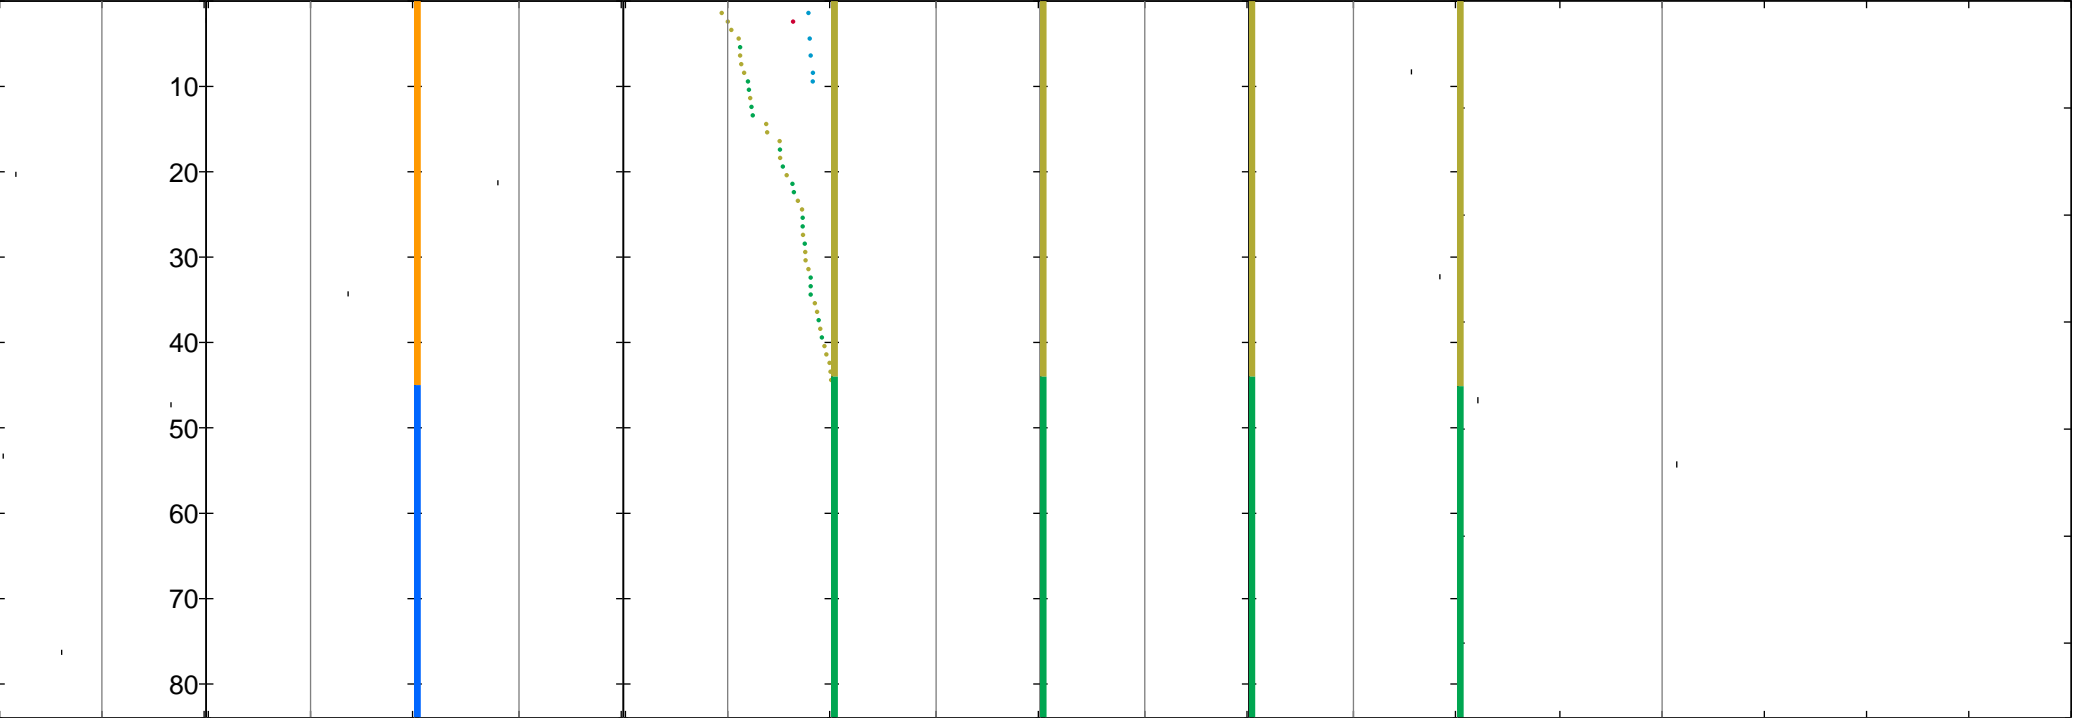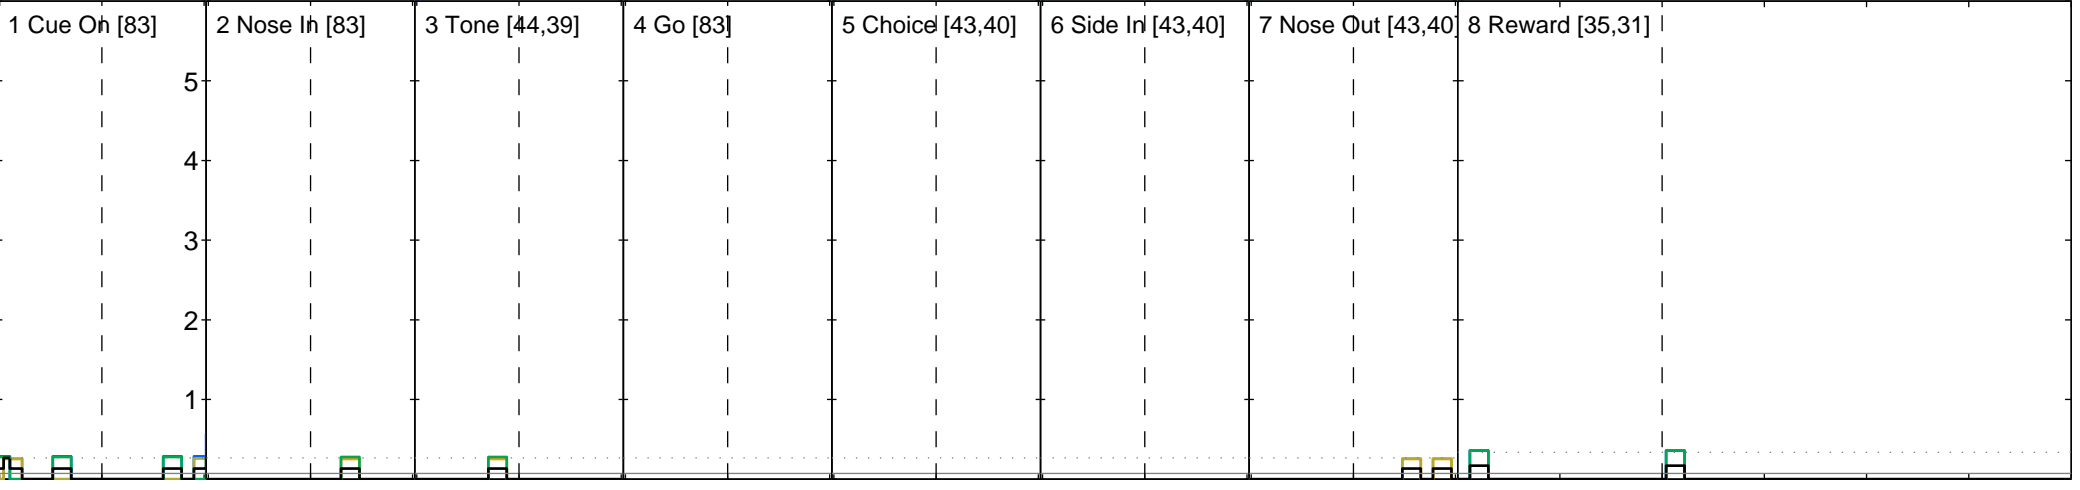

**Cell: C1220071022T11d**

AP: -2.8 ML: 4.2 DV: 6.6  
w: 4 n: 141  $P_{ISI>2}$ : 0.99  
1/2pw: 218 $\mu$ s p->v: 992 $\mu$ s  
 $\beta_T$ : NaN  $\beta_D$ : NaN  
 $\beta_P$ : NaN SI: NaN  
Session FR: 0.0804 Hz  
Pk Ev: None  
Pk FR: --

MSN

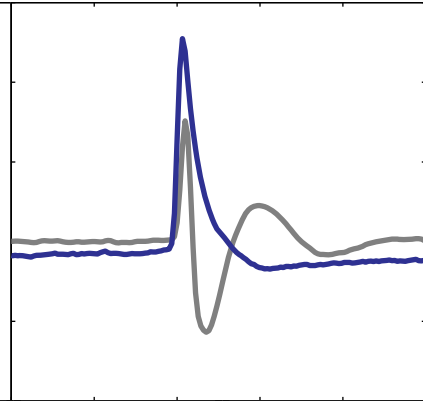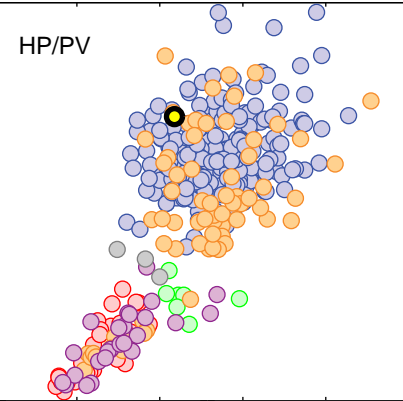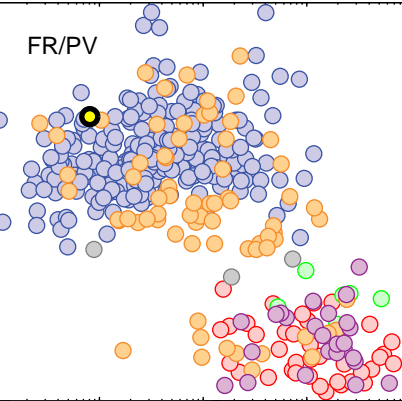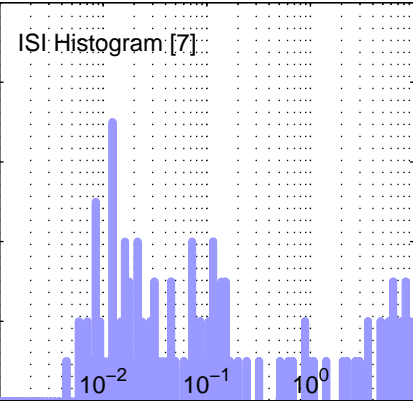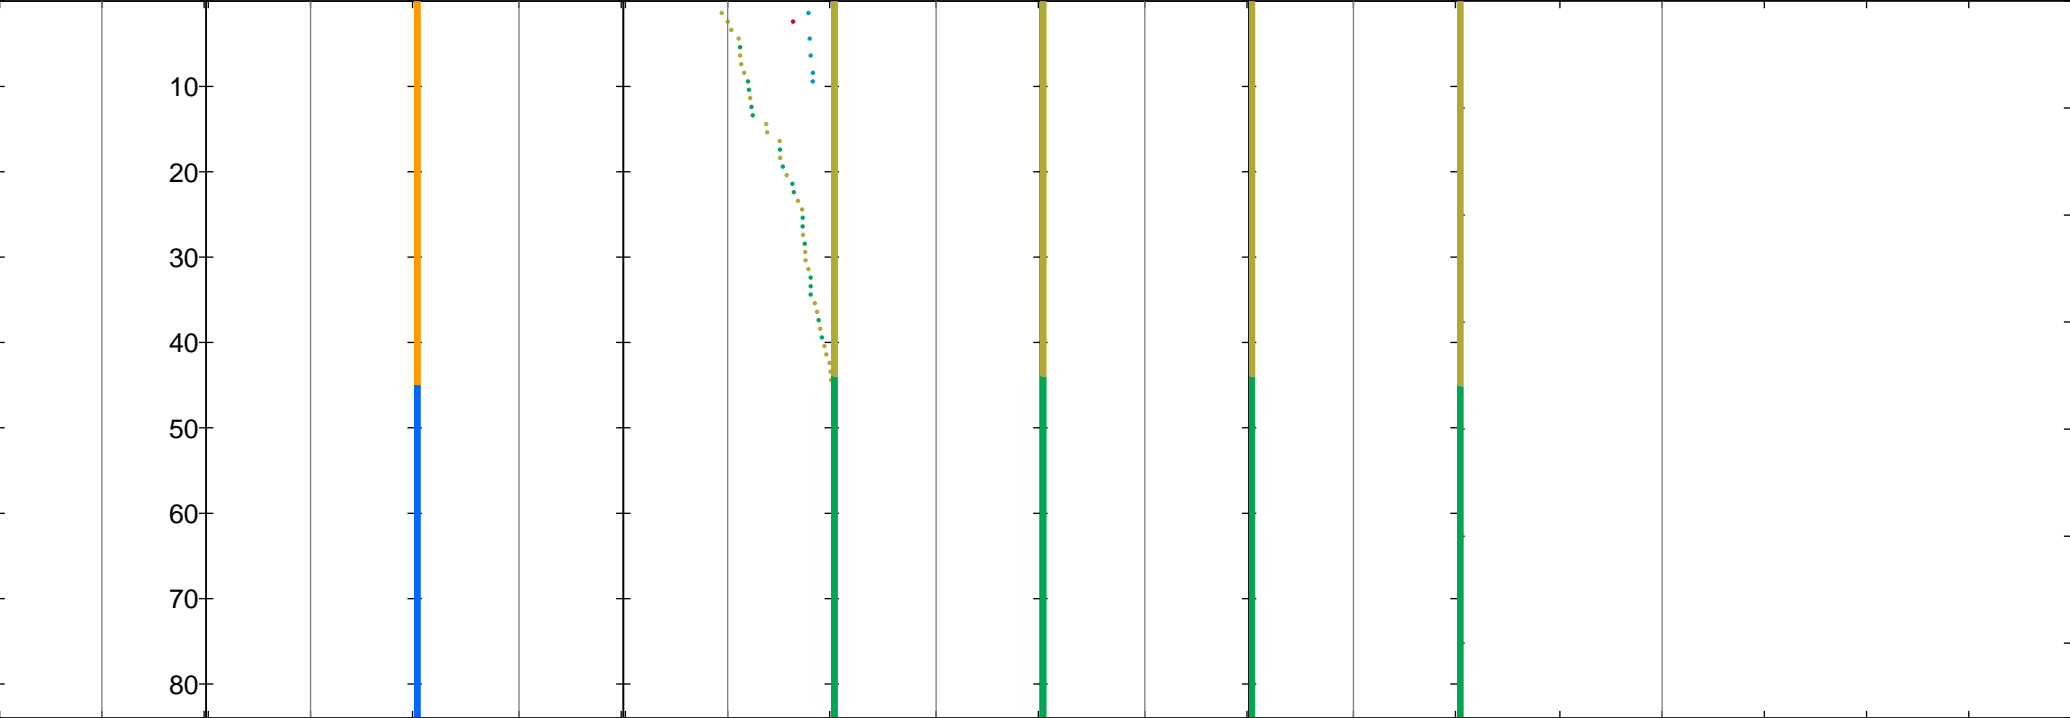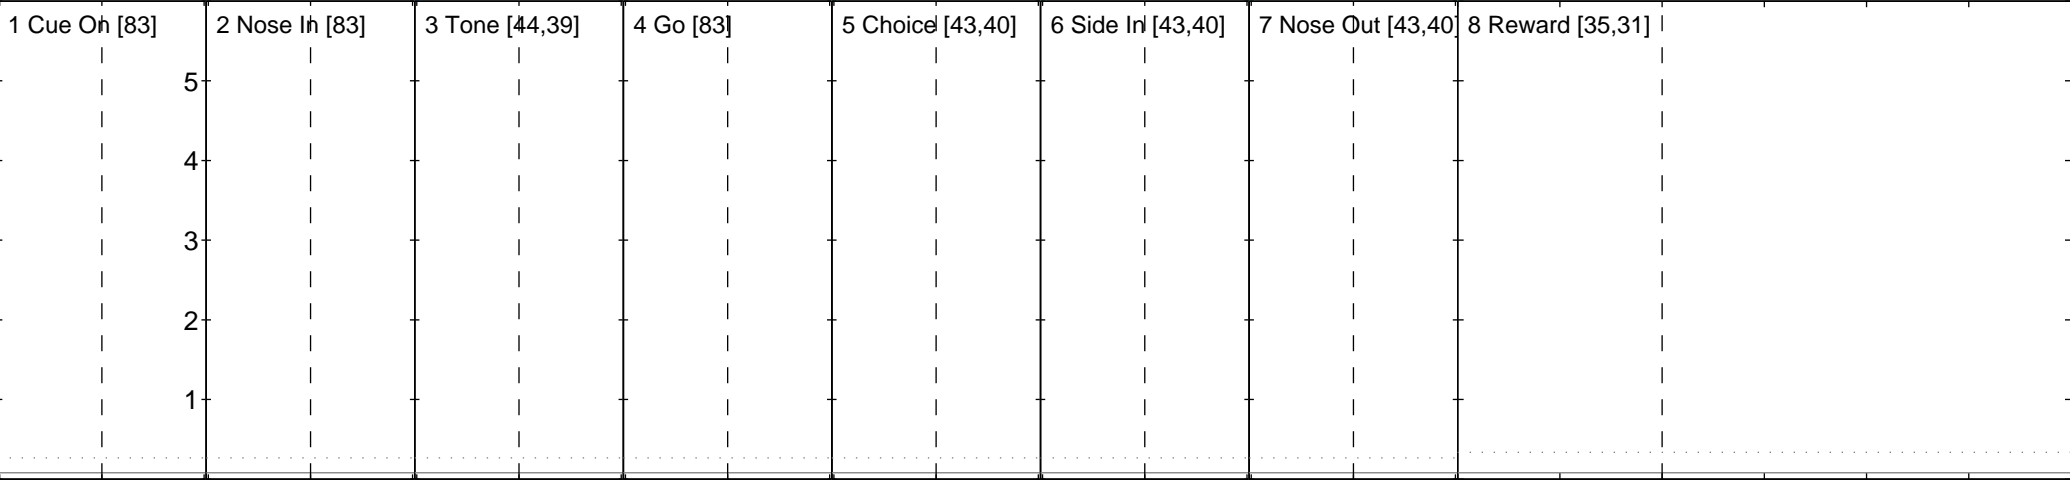

**Cell: C1220071022T11e**

AP: -2.8 ML: 4.2 DV: 6.6

w: 4 n: 1689  $P_{ISI>2}$ : 0.95

1/2pw: 346 $\mu$ s p->v: 907 $\mu$ s

$\beta_T$ : NaN  $\beta_D$ : NaN

$\beta_P$ : NaN SI: NaN

Session FR: 0.287 Hz

Pk Ev: None

Pk FR: --

MSN

Waveform

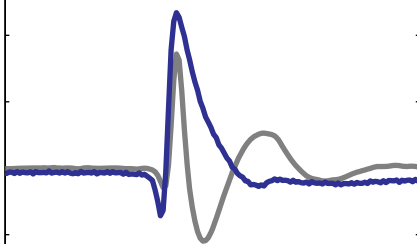

HP/PV

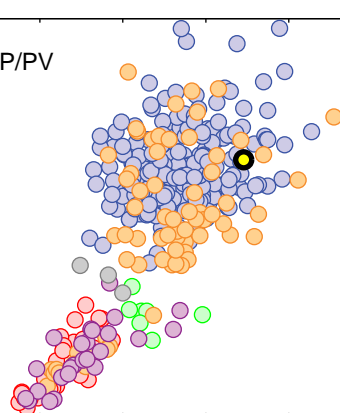

FR/PV

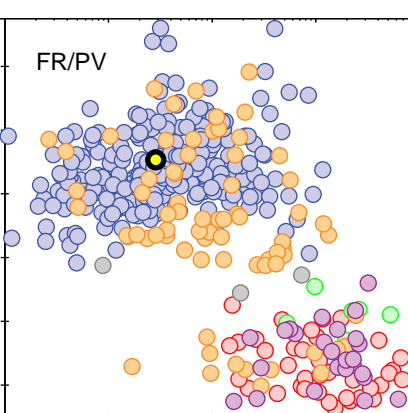

ISI Histogram [48]

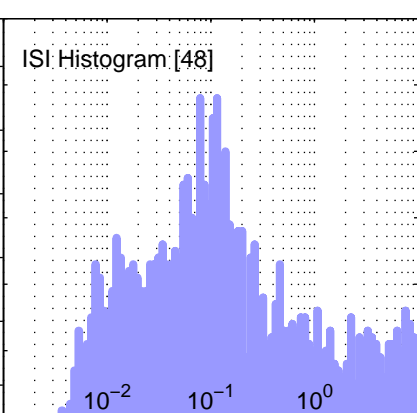

10

20

30

40

50

60

70

80

1 Cue On [83]

2 Nose In [83]

3 Tone [44,39]

4 Go [83]

5 Choice [43,40]

6 Side In [43,40]

7 Nose Out [43,40]

8 Reward [35,31]

5

4

3

2

1

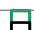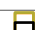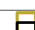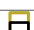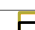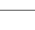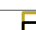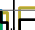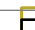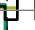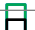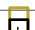

**Cell: C1220071022T11g**

AP: -2.8 ML: 4.2 DV: 6.6

w: 4 n: 1629  $P_{ISI>2}$ : 0.921/2pw: 282 $\mu$ s p->v: 798 $\mu$ s $\beta_T$ : NaN  $\beta_D$ : NaN $\beta_P$ : NaN SI: NaN

Session FR: 0.276 Hz

Pk Ev: None

Pk FR: --

MSN

Waveform

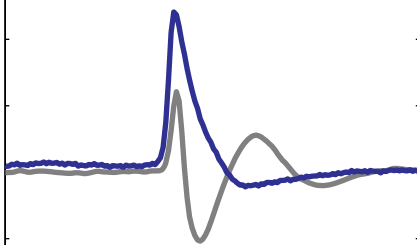

HP/PV

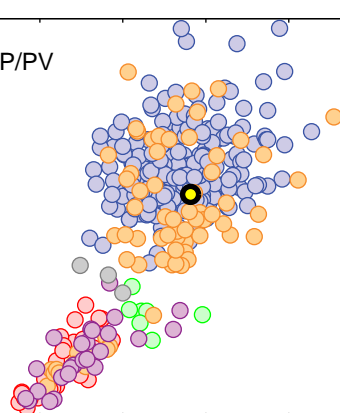

FR/PV

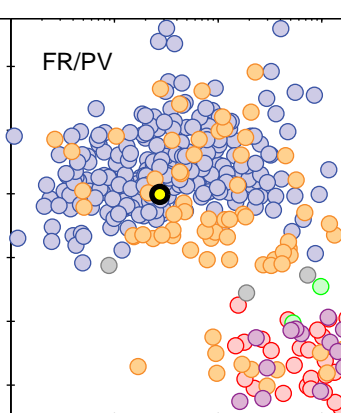

ISI Histogram [41]

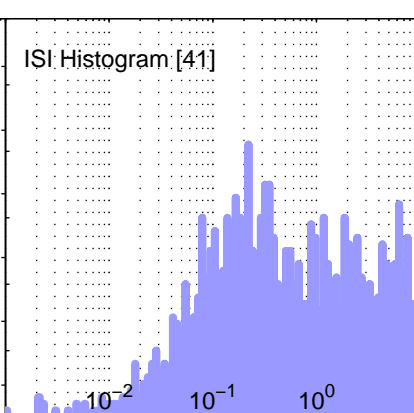

10

20

30

40

50

60

70

80

1 Cue On [83]

2 Nose In [83]

3 Tone [44,39]

4 Go [83]

5 Choice [43,40]

6 Side In [43,40]

7 Nose Out [43,40]

8 Reward [35,31]

5

4

3

2

1

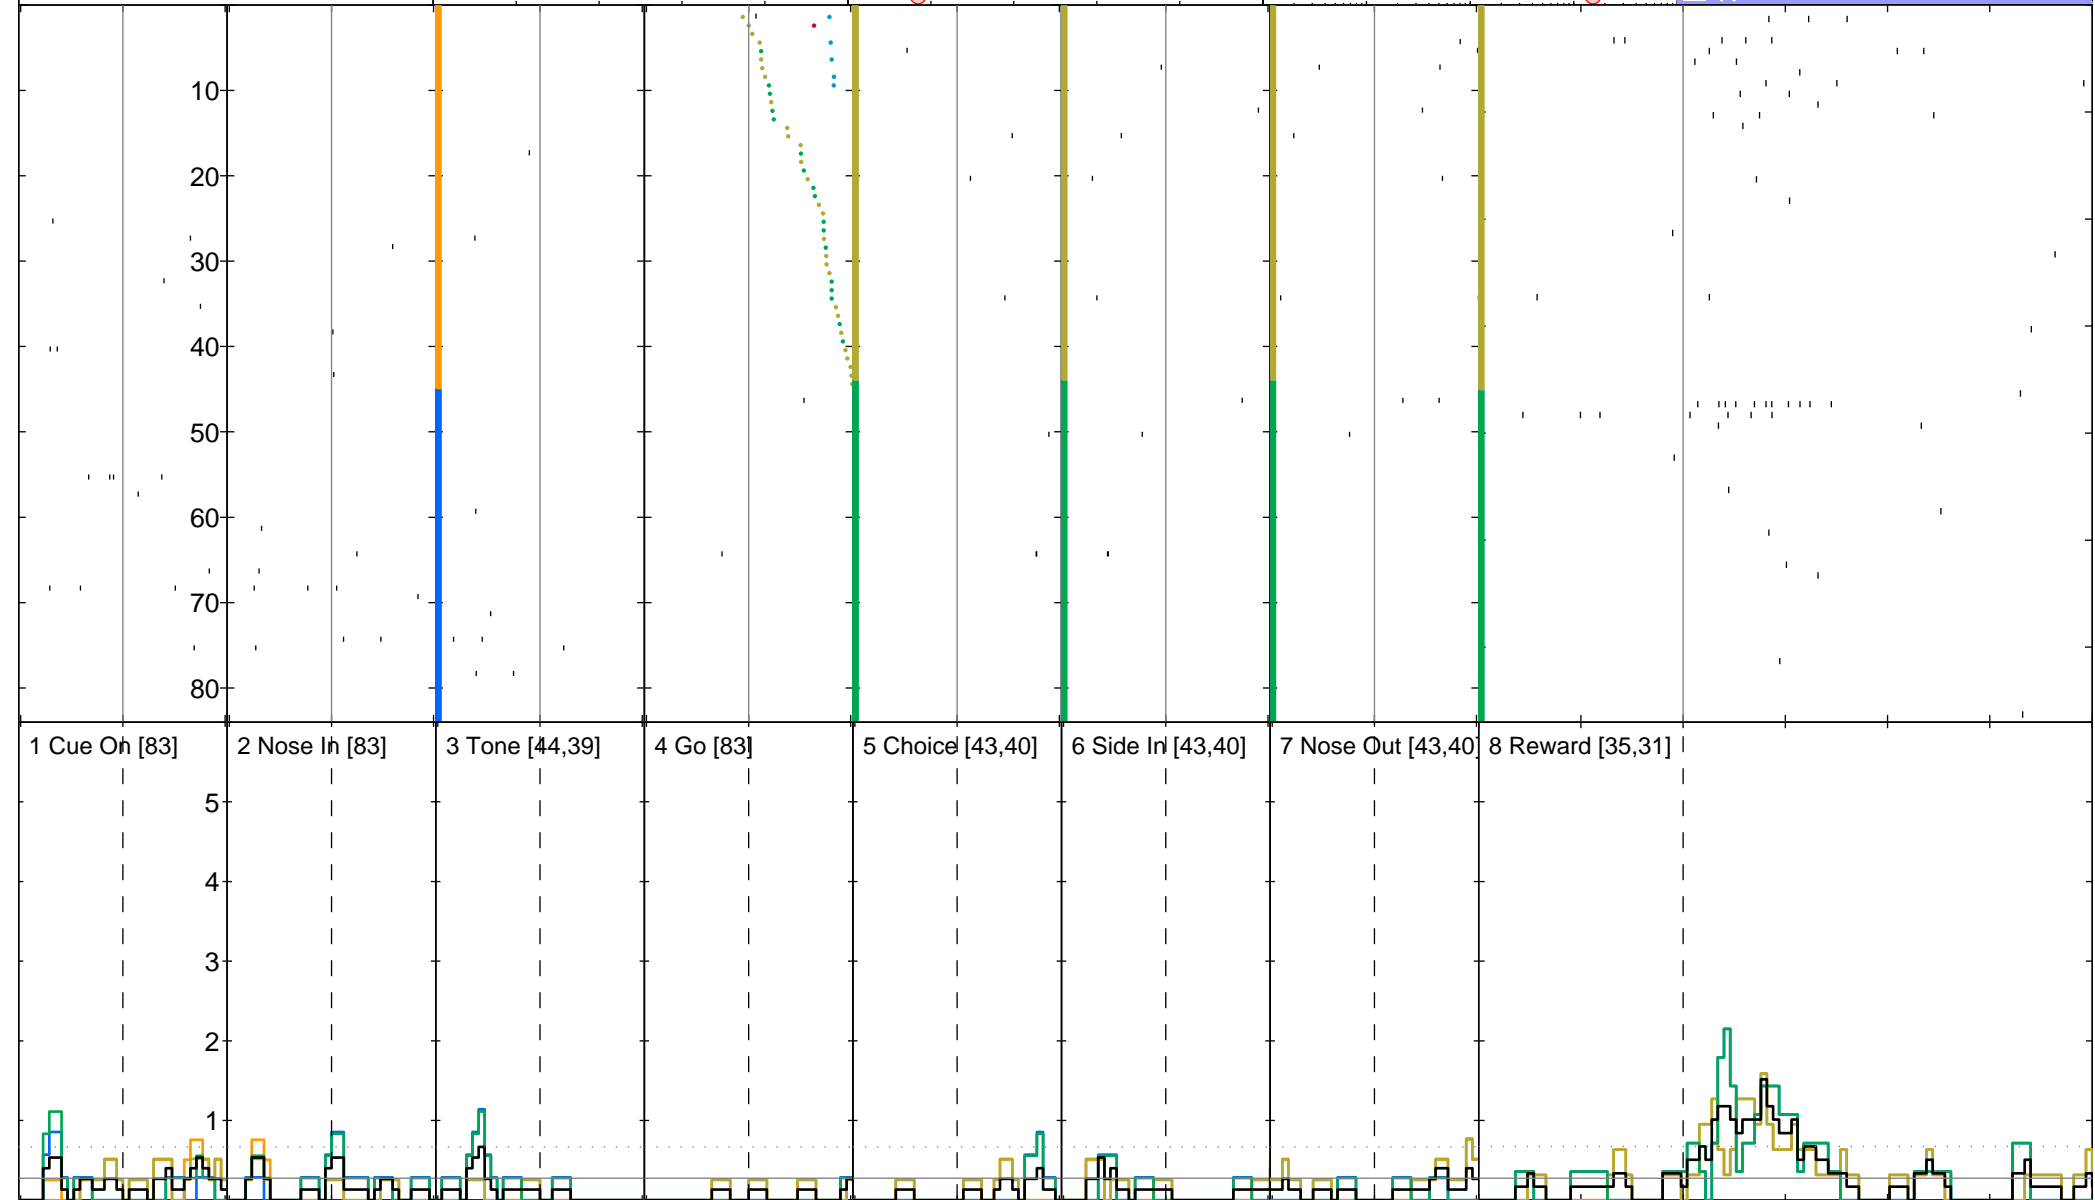

**Cell: C1220071022T11h**

AP: -2.8 ML: 4.2 DV: 6.6

w: 1 n: 353  $P_{ISI>2}$ : 0.99

1/2pw: 374 $\mu$ s p->v: 970 $\mu$ s

$\beta_T$ : NaN  $\beta_D$ : NaN

$\beta_P$ : NaN SI: NaN

Session FR: 0.0683 Hz

Pk Ev: None

Pk FR: --

MSN

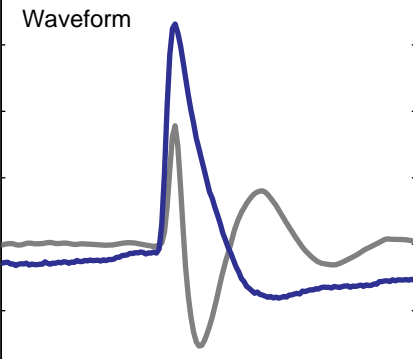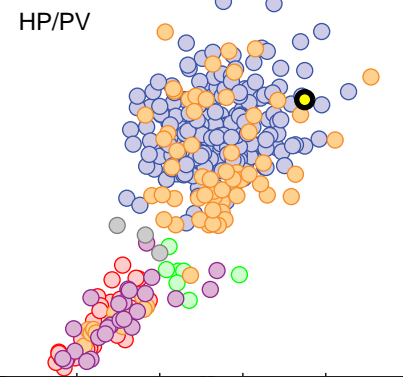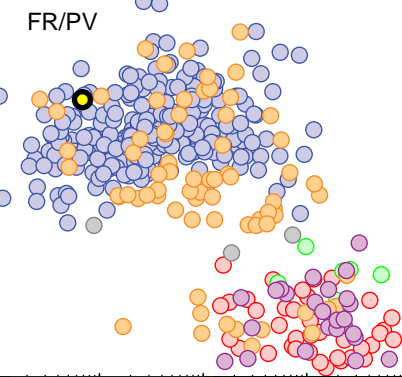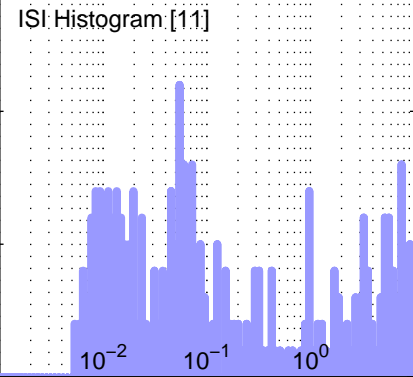

10  
20  
30  
40  
50  
60  
70  
80

1 Cue On [83] 2 Nose In [83] 3 Tone [44,39] 4 Go [83] 5 Choice [43,40] 6 Side In [43,40] 7 Nose Out [43,40] 8 Reward [35,31]

5  
4  
3  
2  
1

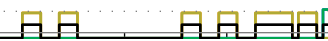

**Cell: C1220071024T05b**

AP: 1.4 ML: 2.1 DV: 6.9  
w: 3 n: 3151  $P_{ISI>2}$ : 0.91  
1/2pw: 328 $\mu$ s p->v: 845 $\mu$ s  
 $\beta_T$ : NaN  $\beta_D$ : NaN  
 $\beta_P$ : NaN SI: NaN  
Session FR: 0.428 Hz  
Pk Ev: None  
Pk FR: --

MSN

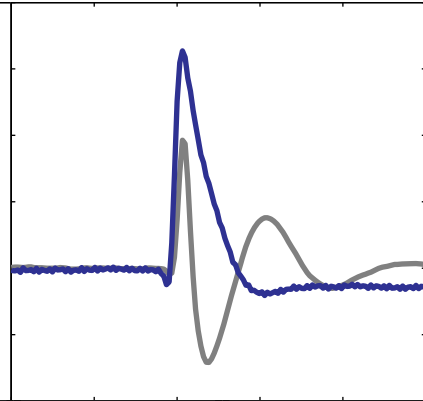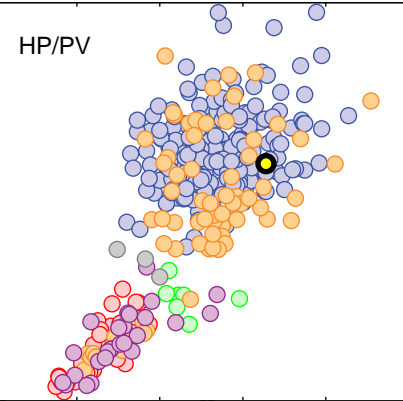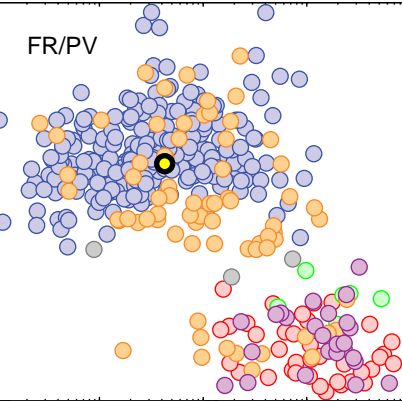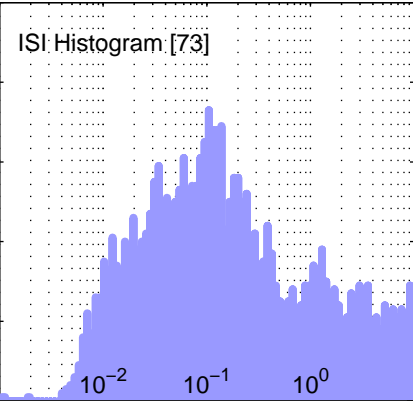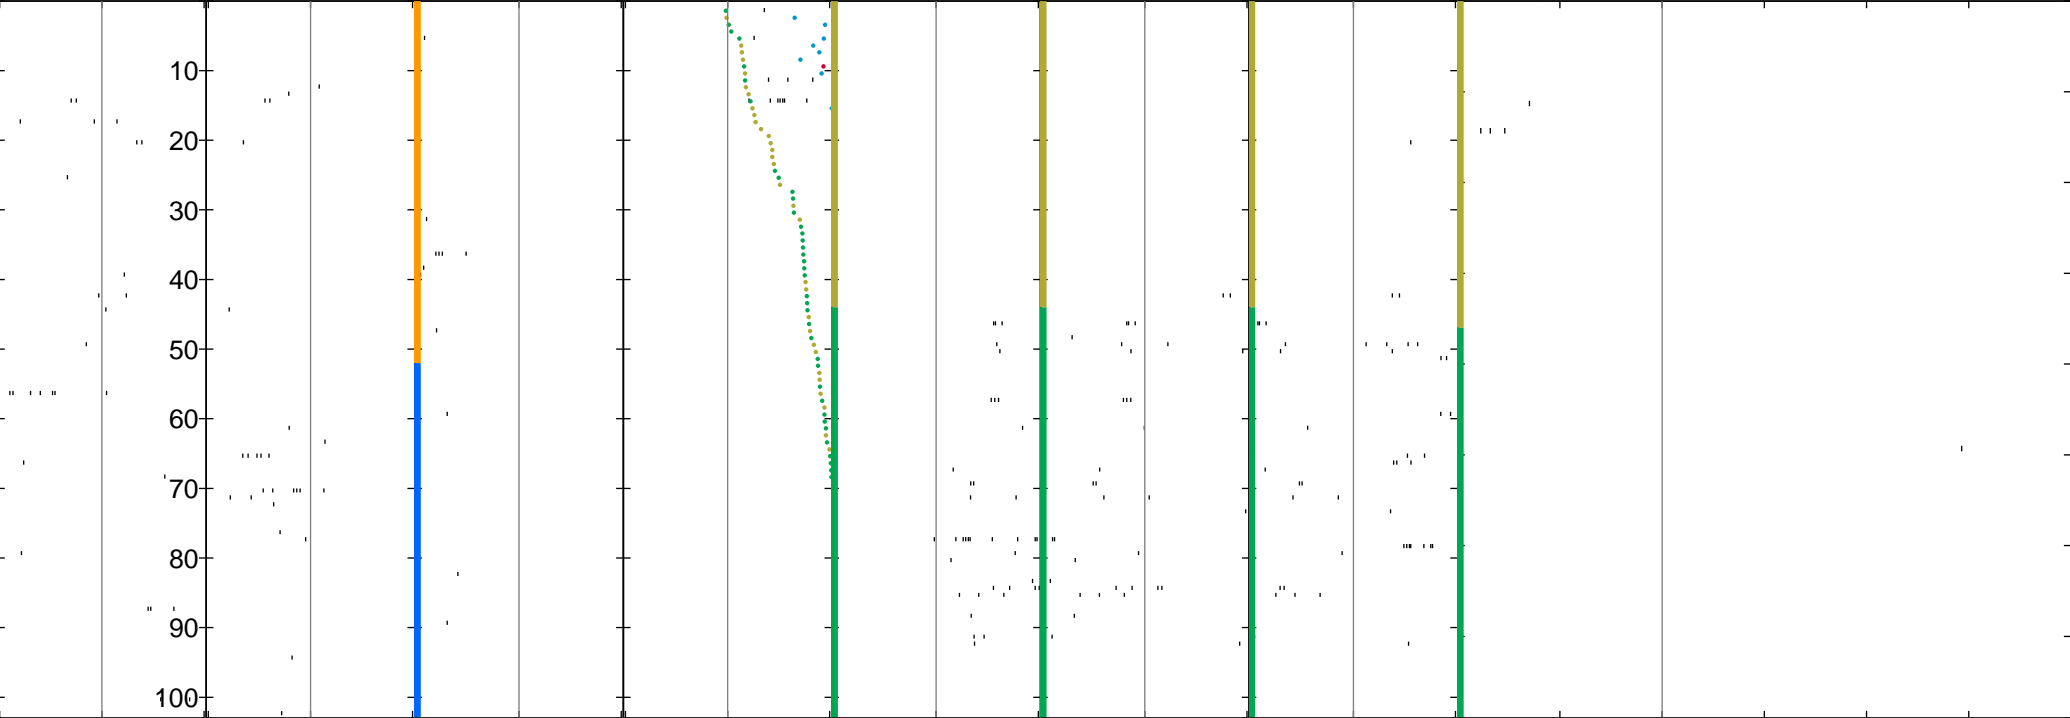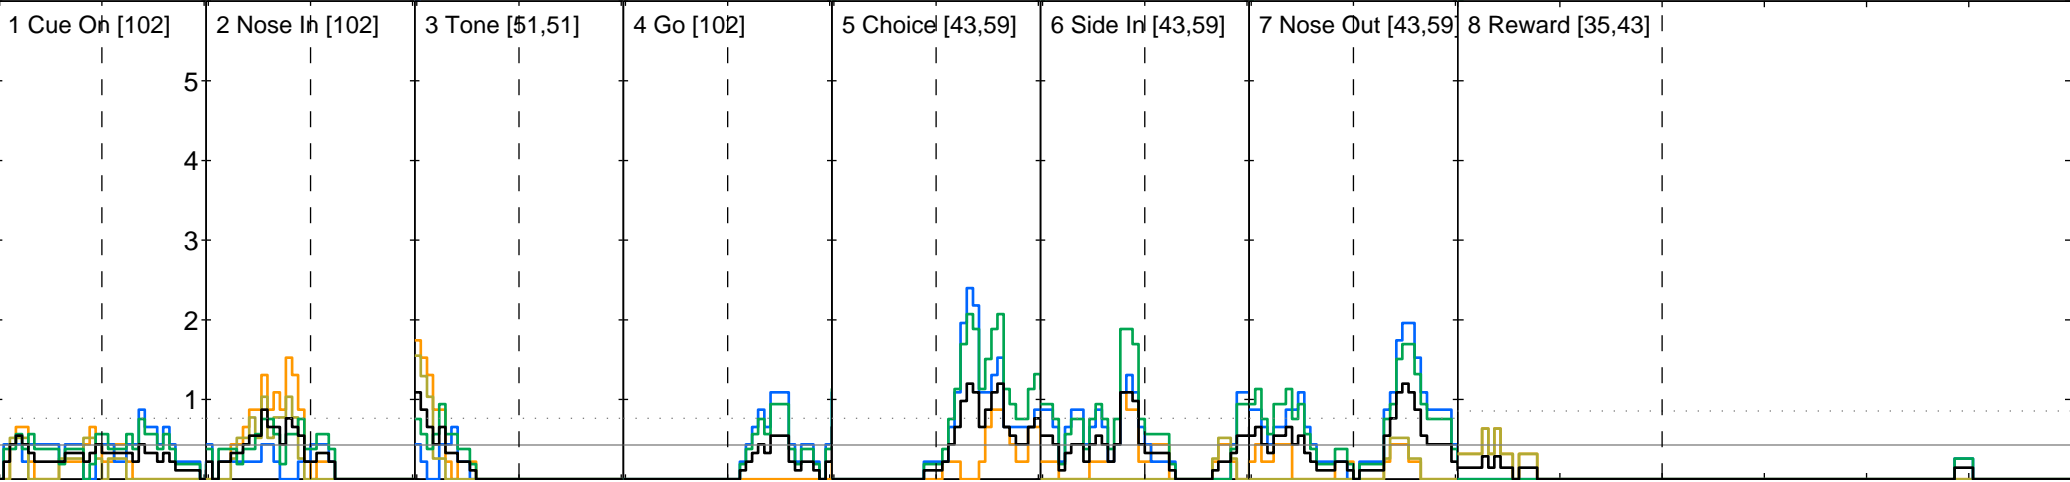

**Cell: C1220071024T05c**

AP: 1.4 ML: 2.1 DV: 6.9

w: 4 n: 1426  $P_{ISI>2}$ : 0.96

1/2pw: 360 $\mu$ s p $\rightarrow$ v: 826 $\mu$ s

$\beta_T$ : NaN  $\beta_D$ : NaN

$\beta_P$ : NaN SI: NaN

Session FR: 0.194 Hz

Pk Ev: None

Pk FR: --

MSN

Waveform

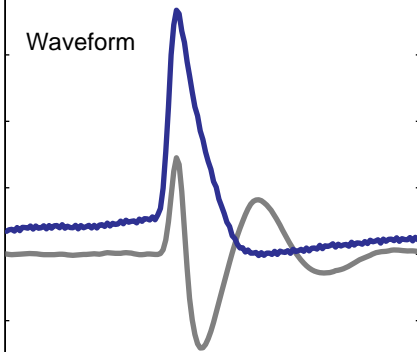

HP/PV

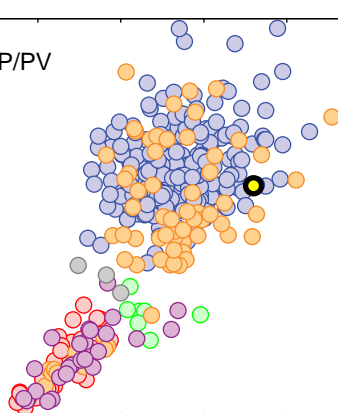

FR/PV

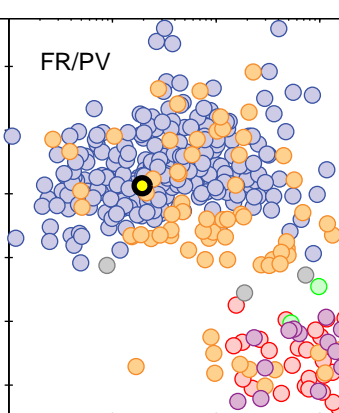

ISI Histogram [37]

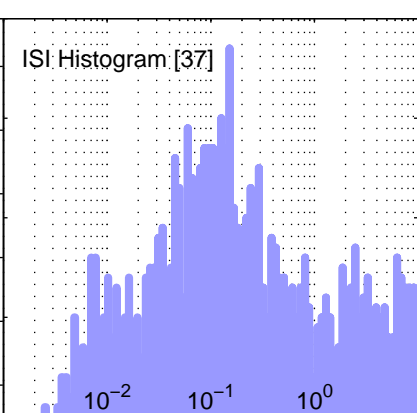

10  
20  
30  
40  
50  
60  
70  
80  
90  
100

1 Cue On [102]

2 Nose In [102]

3 Tone [51,51]

4 Go [102]

5 Choice [43,59]

6 Side In [43,59]

7 Nose Out [43,59]

8 Reward [35,43]

5  
4  
3  
2

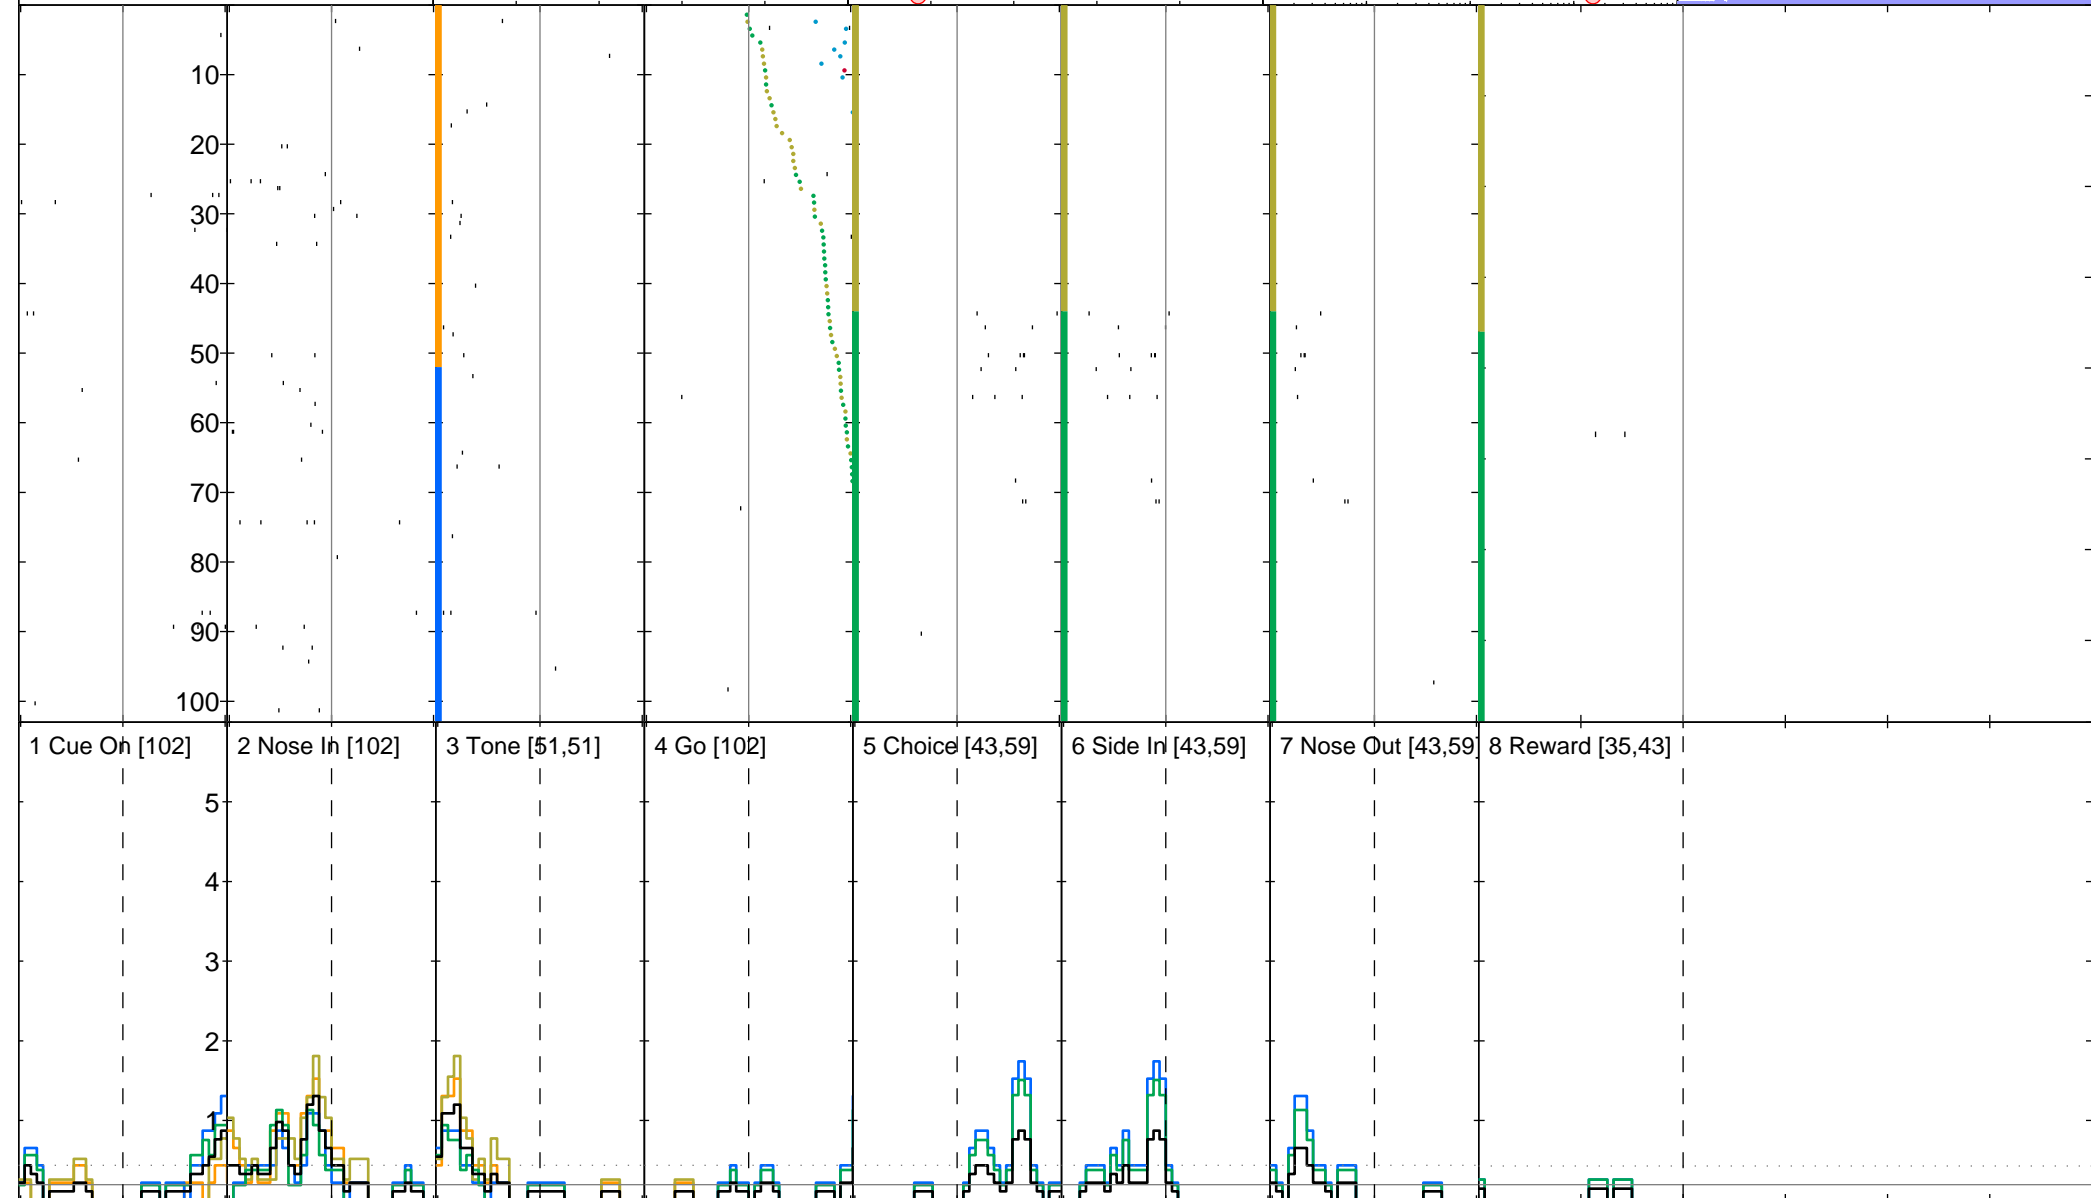



**Cell: C1220071024T11b**

AP: -2.8 ML: 4.2 DV: 6.7

w: 3 n: 2016  $P_{ISI>2}$ : 0.92

1/2pw: 312 $\mu$ s p->v: 883 $\mu$ s

$\beta_T$ : NaN  $\beta_D$ : NaN

$\beta_P$ : NaN SI: NaN

Session FR: 0.274 Hz

Pk Ev: None

Pk FR: --

MSN

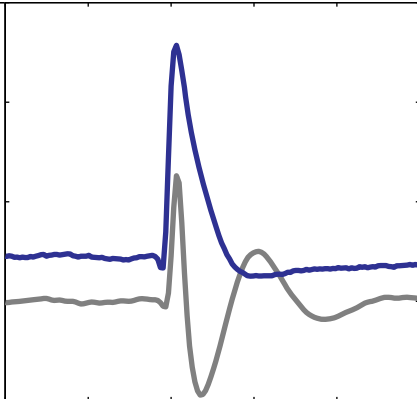

HP/PV

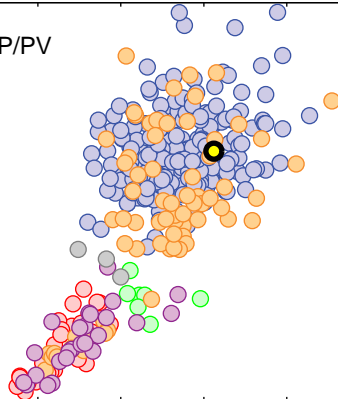

FR/PV

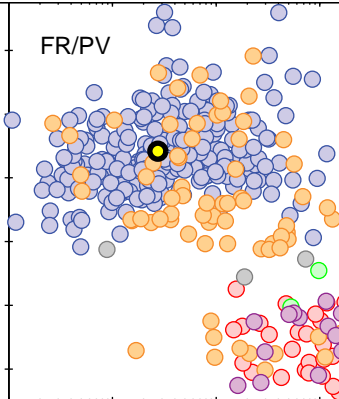

ISI Histogram [46]

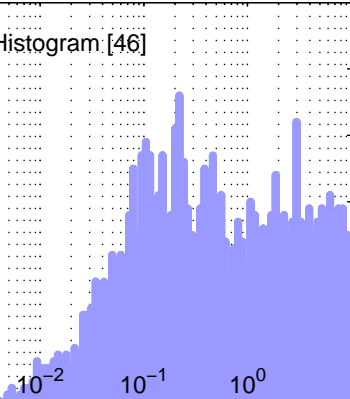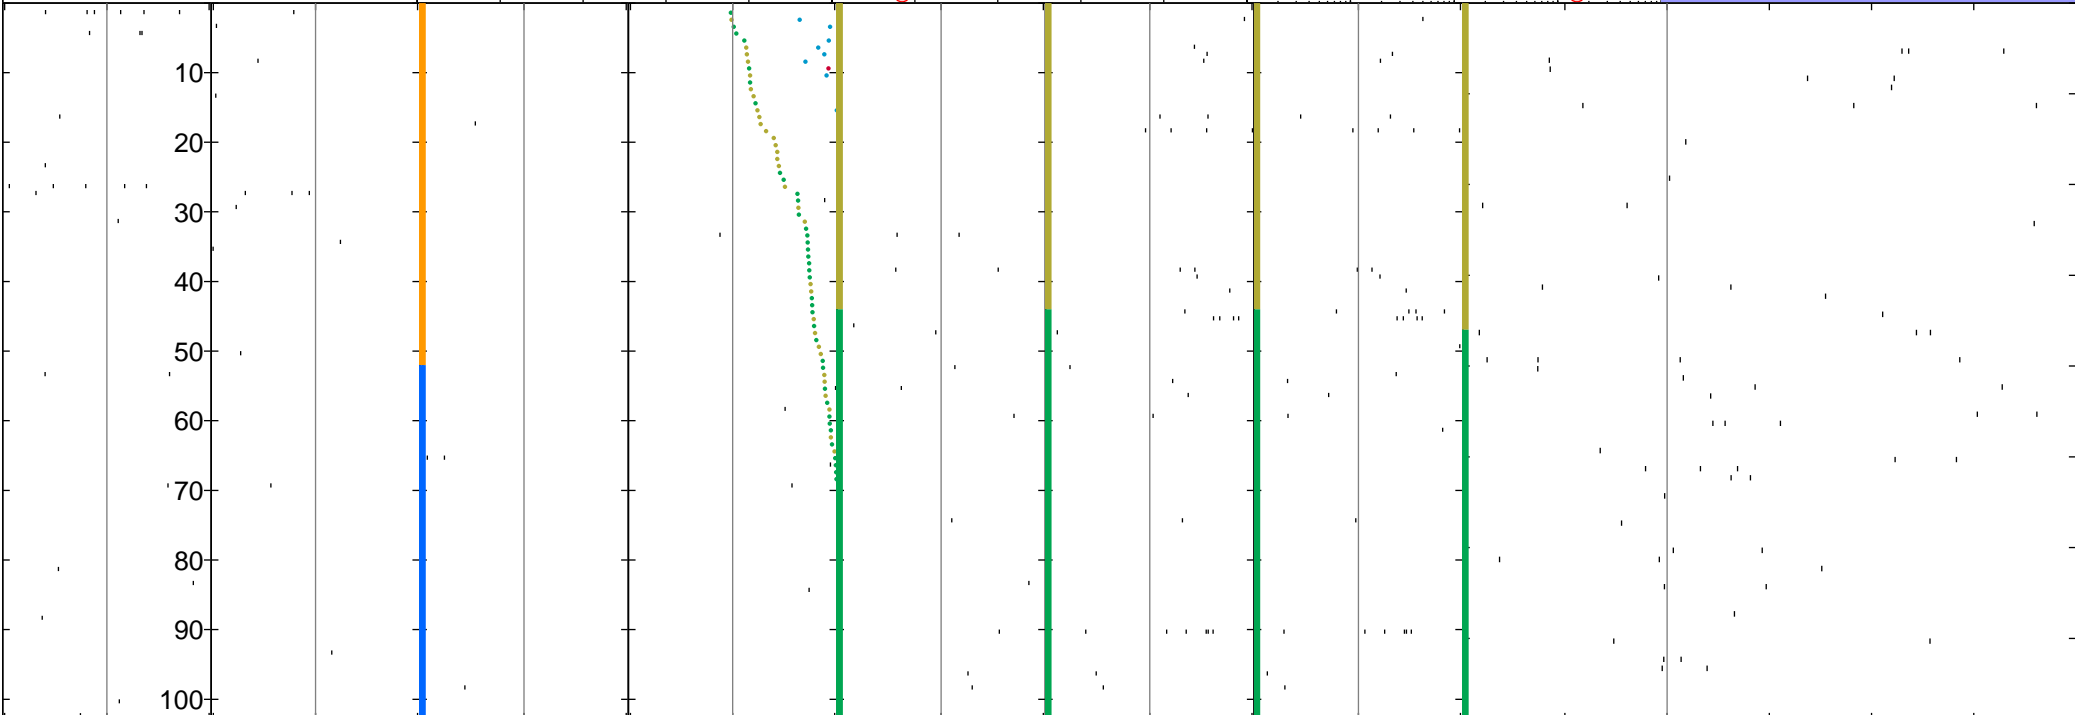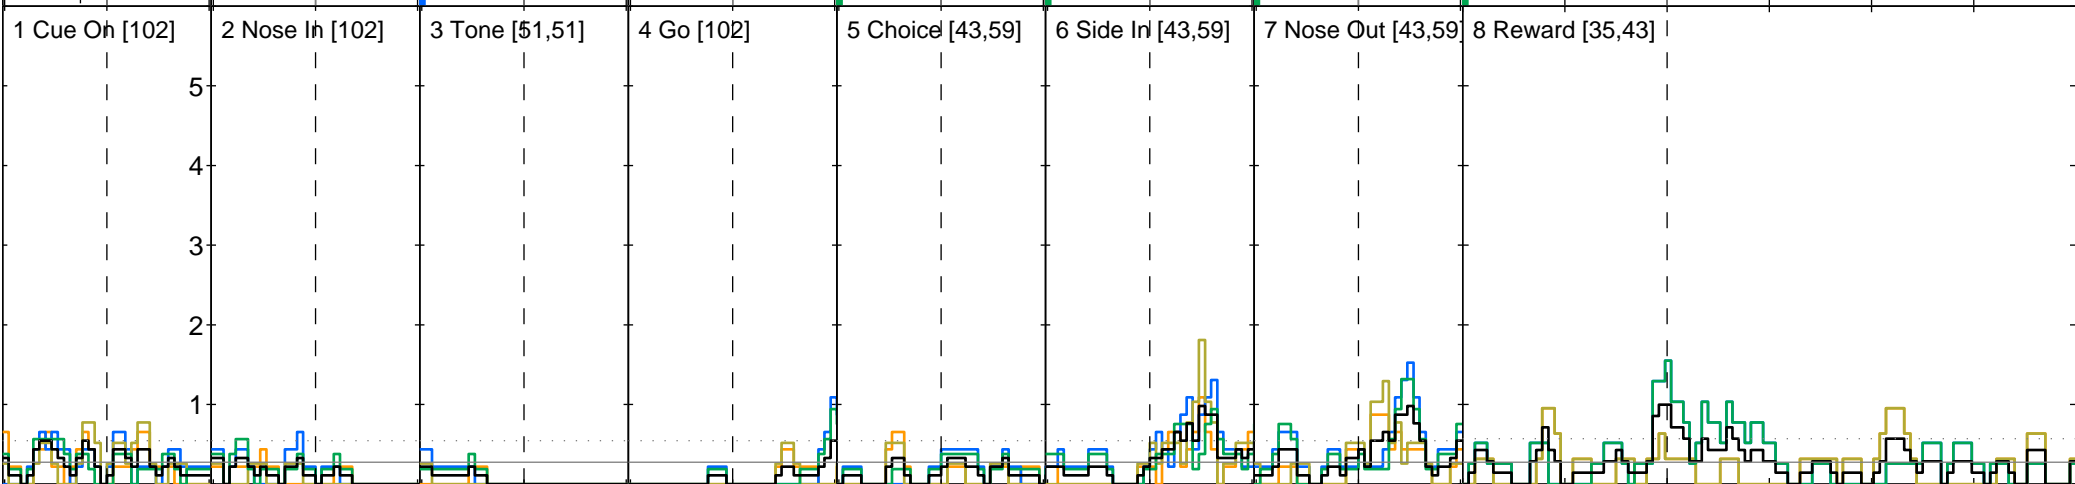

**Cell: C1220071025T11c**

AP: -2.8 ML: 4.2 DV: 6.8  
w: 3 n: 2980  $P_{ISI>2}$ : 0.9  
1/2pw: 298 $\mu$ s p->v: 918 $\mu$ s  
 $\beta_T$ : NaN  $\beta_D$ : NaN  
 $\beta_P$ : NaN SI: NaN  
Session FR: 0.455 Hz  
Pk Ev: None  
Pk FR: --

MSN

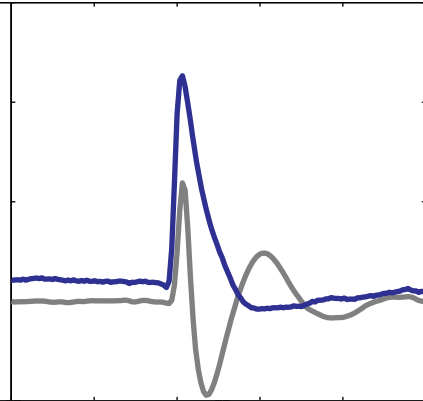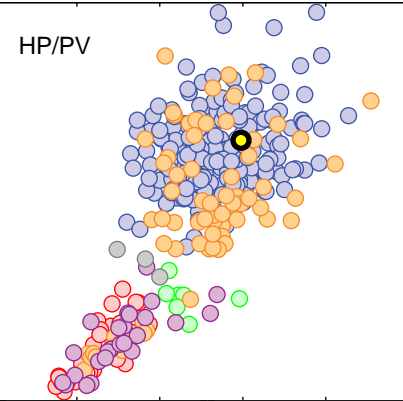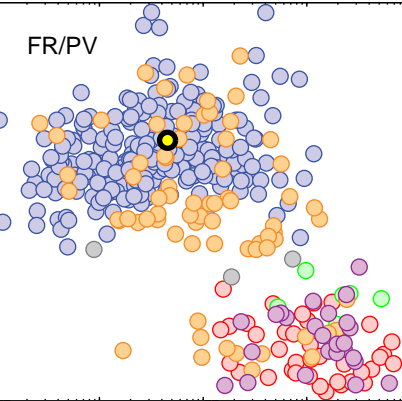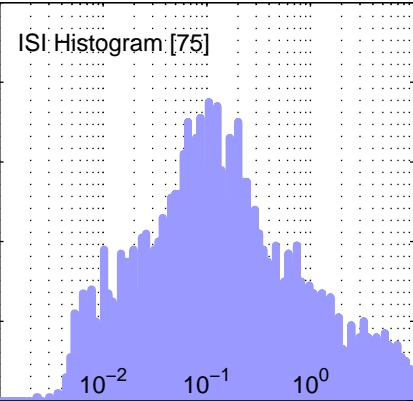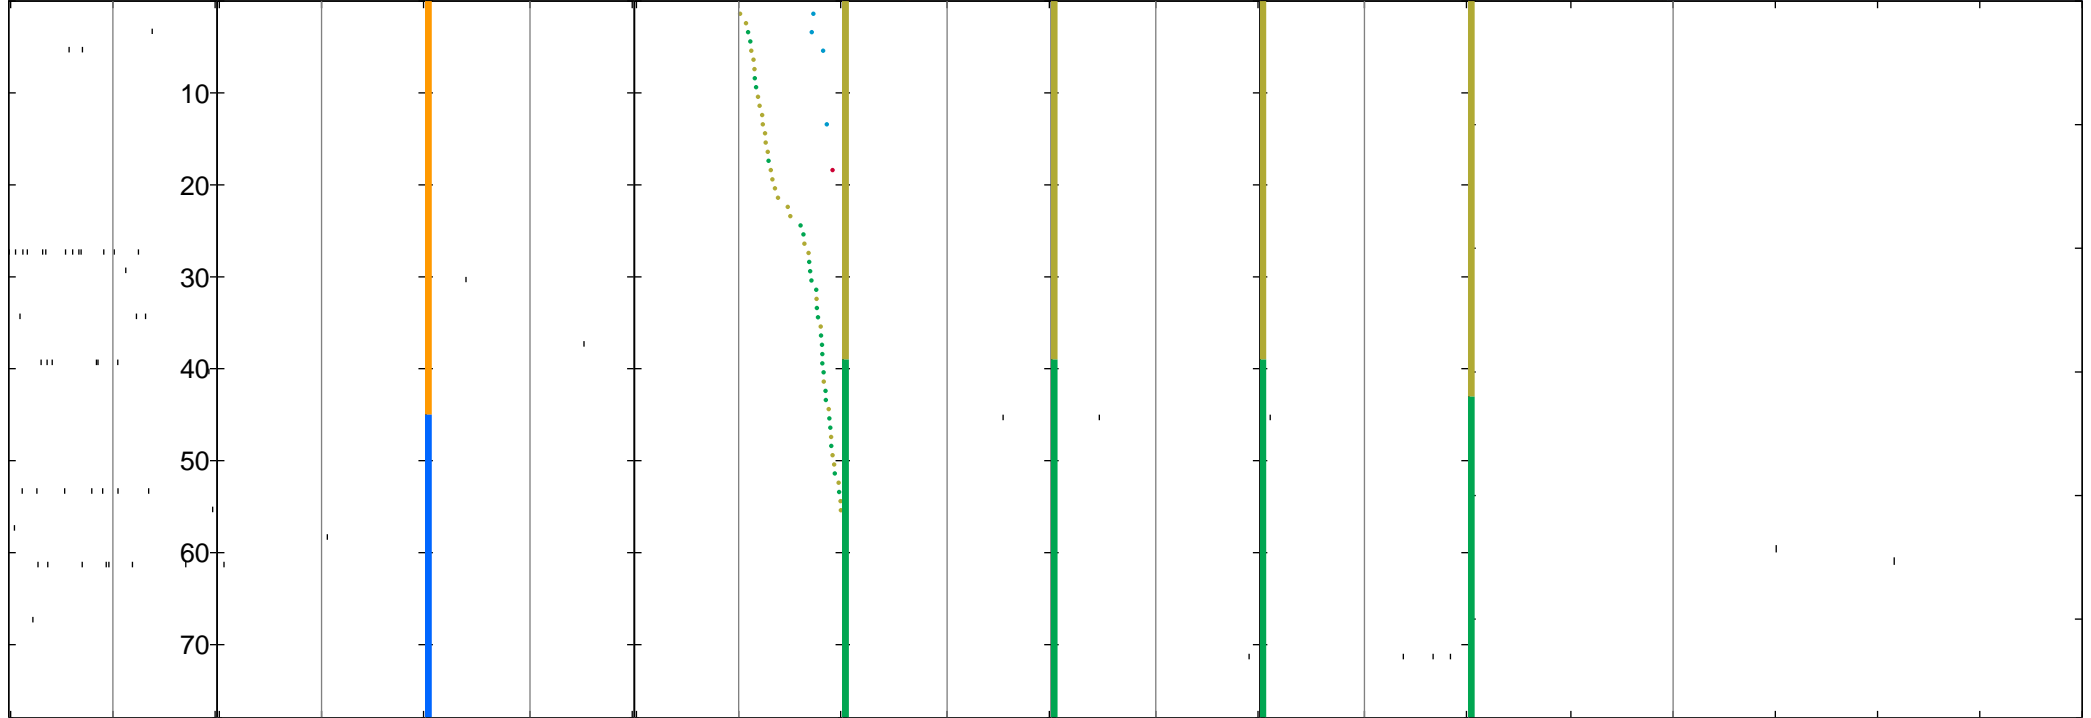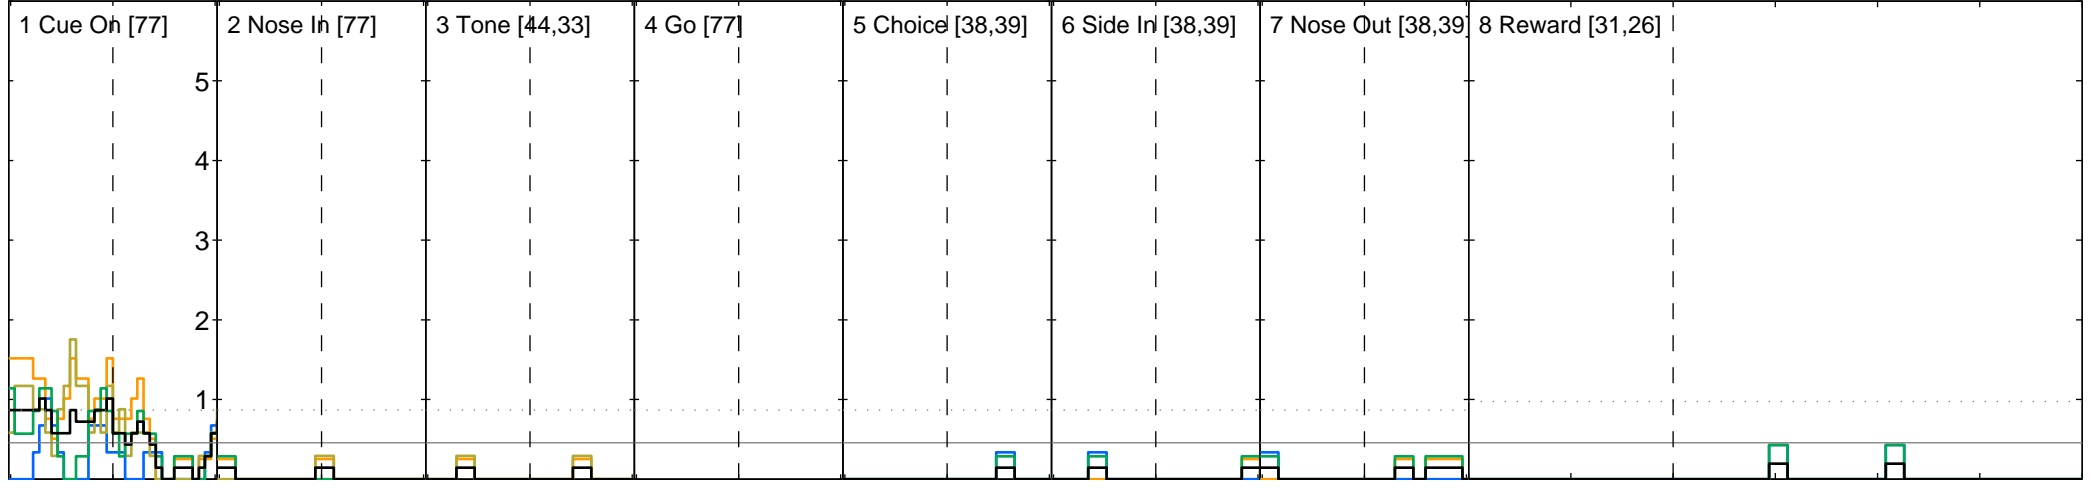

**Cell: C1220071025T11d**

AP: -2.8 ML: 4.2 DV: 6.8

w: 1 n: 1885  $P_{ISI>2}$ : 0.93

1/2pw: 288 $\mu$ s p->v: 781 $\mu$ s

$\beta_T$ : NaN  $\beta_D$ : NaN

$\beta_P$ : NaN SI: NaN

Session FR: 0.28 Hz

Pk Ev: None

Pk FR: --

MSN

Waveform

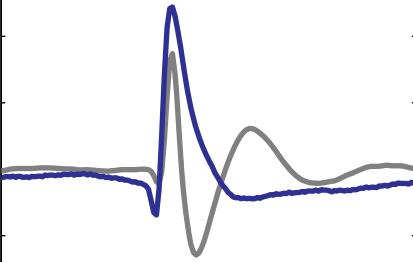

HP/PV

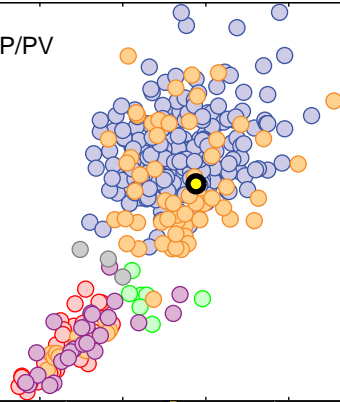

FR/PV

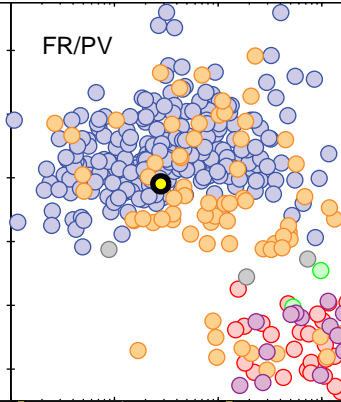

ISI Histogram [49]

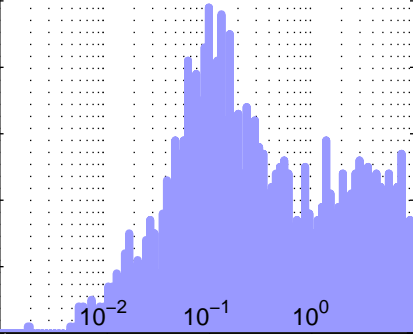

10

20

30

40

50

60

70

1 Cue On [77]

2 Nose In [77]

3 Tone [44,33]

4 Go [77]

5 Choice [38,39]

6 Side In [38,39]

7 Nose Out [38,39]

8 Reward [31,26]

5

4

3

2

1

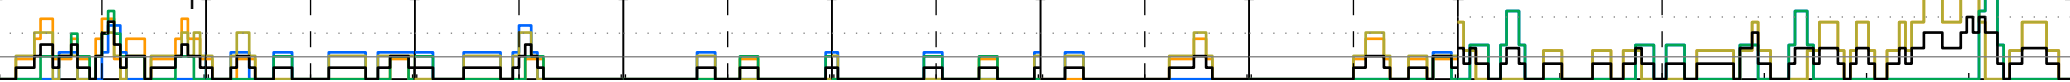

**Cell: C1220071027T05a**

AP: 1.4 ML: 2.1 DV: 6.9  
w: 2 n: 445  $P_{ISI>2}$ : 0.99  
1/2pw: 326 $\mu$ s p->v: 984 $\mu$ s  
 $\beta_T$ : NaN  $\beta_D$ : NaN  
 $\beta_P$ : NaN SI: NaN  
Session FR: 0.0709 Hz  
Pk Ev: None  
Pk FR: --

MSN

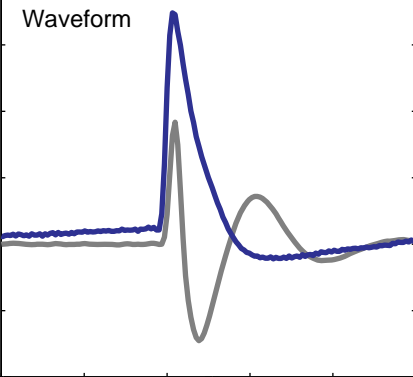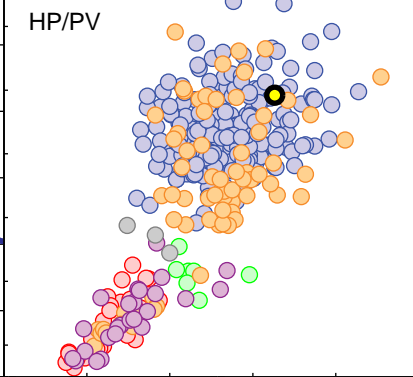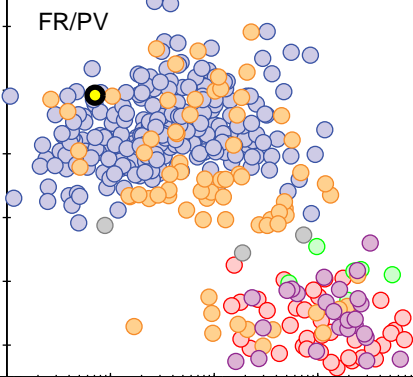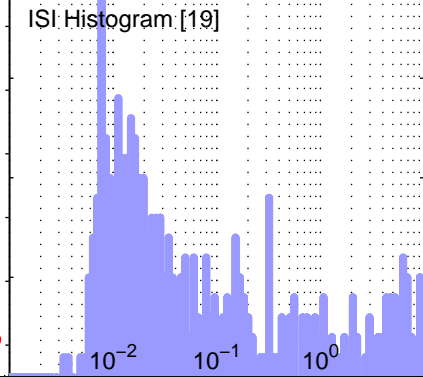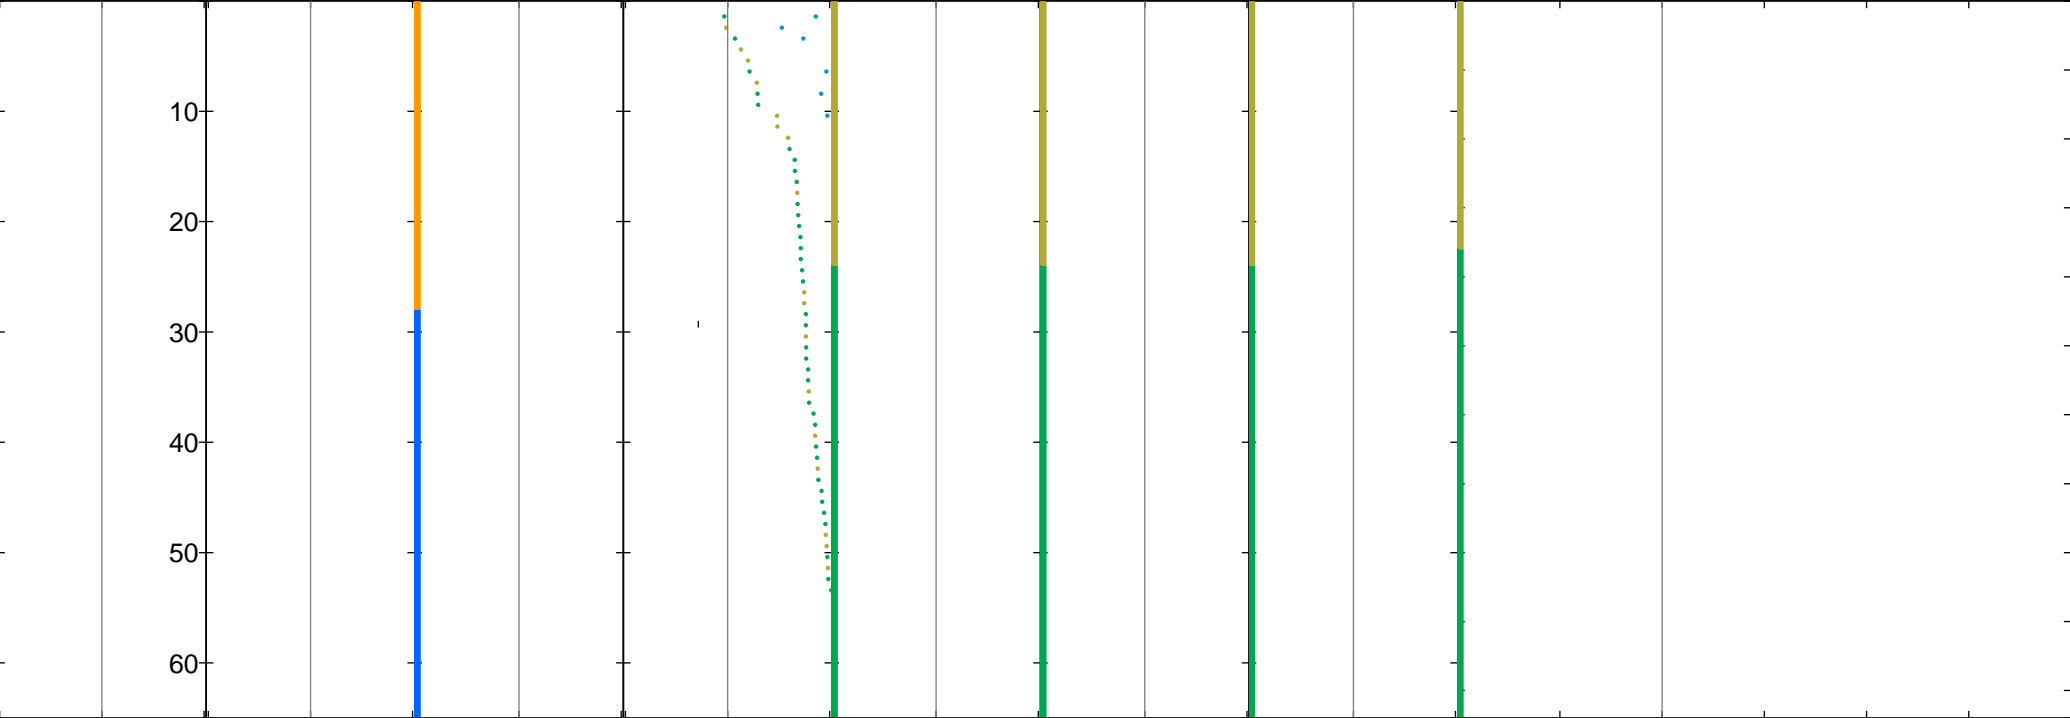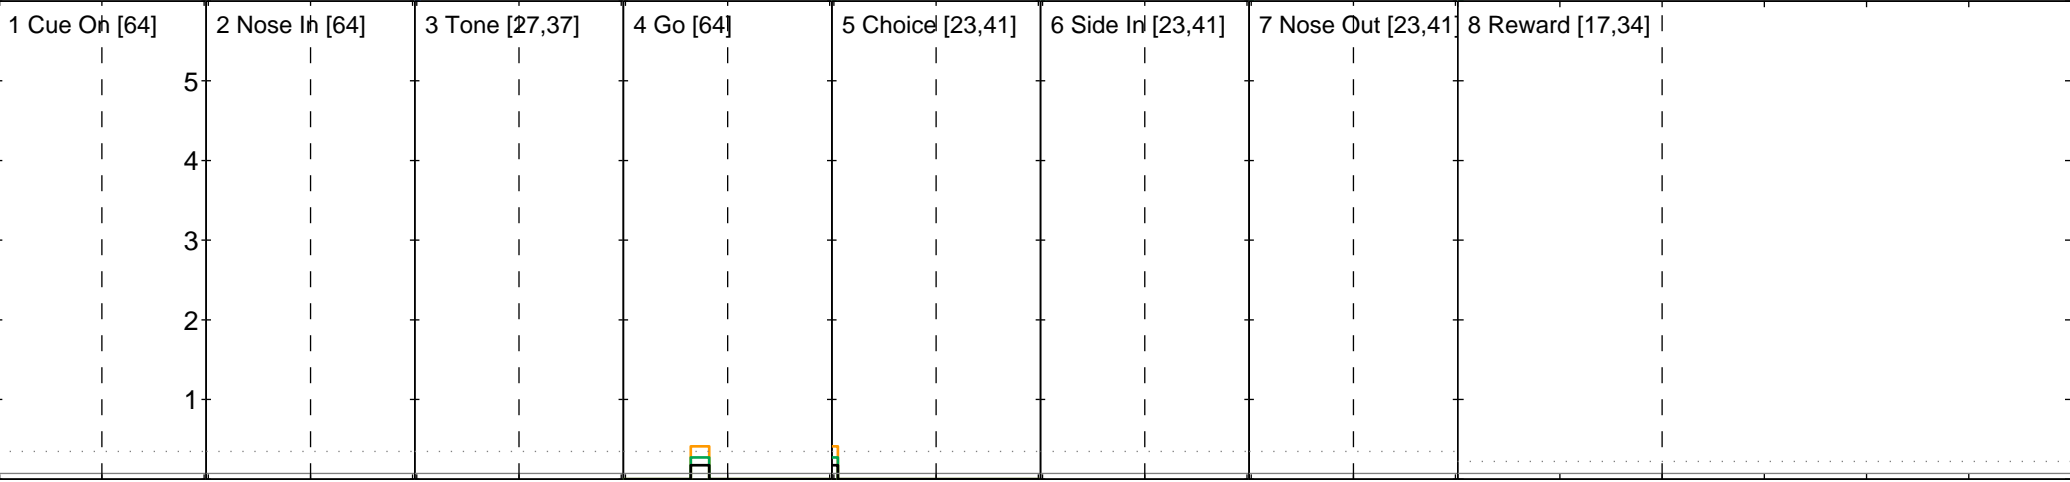

**Cell: C1220071114T05a**

AP: 1.4 ML: 2.1 DV: 7.2  
w: 4 n: 2881  $P_{ISI>2}$ : 0.92  
1/2pw: 296 $\mu$ s p->v: 918 $\mu$ s  
 $\beta_T$ : NaN  $\beta_D$ : NaN  
 $\beta_P$ : NaN SI: NaN  
Session FR: 0.485 Hz  
Pk Ev: None  
Pk FR: --

MSN

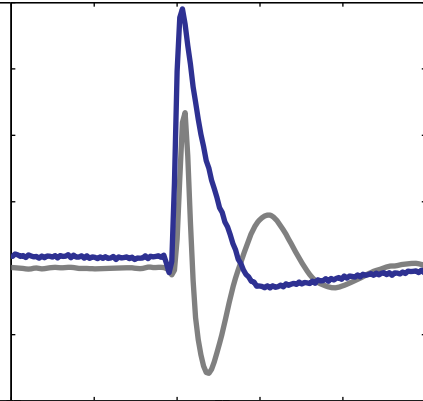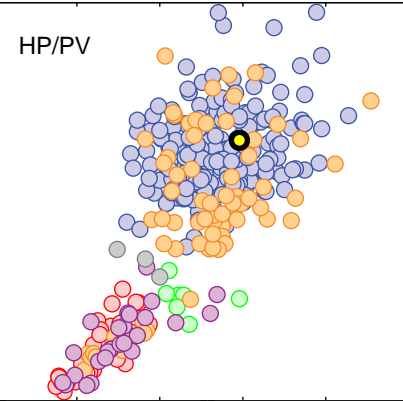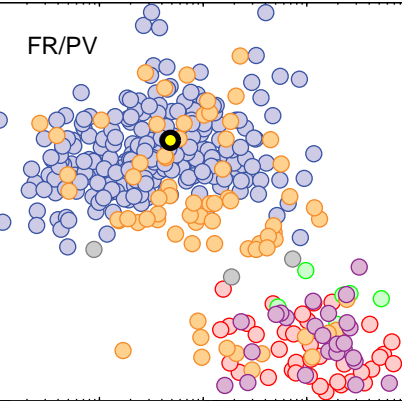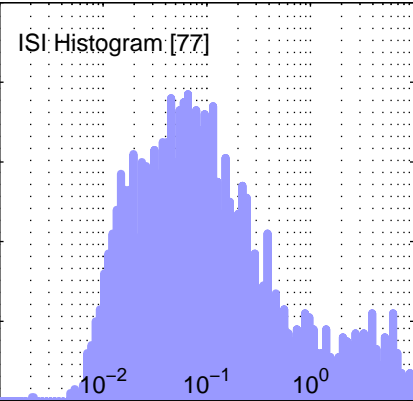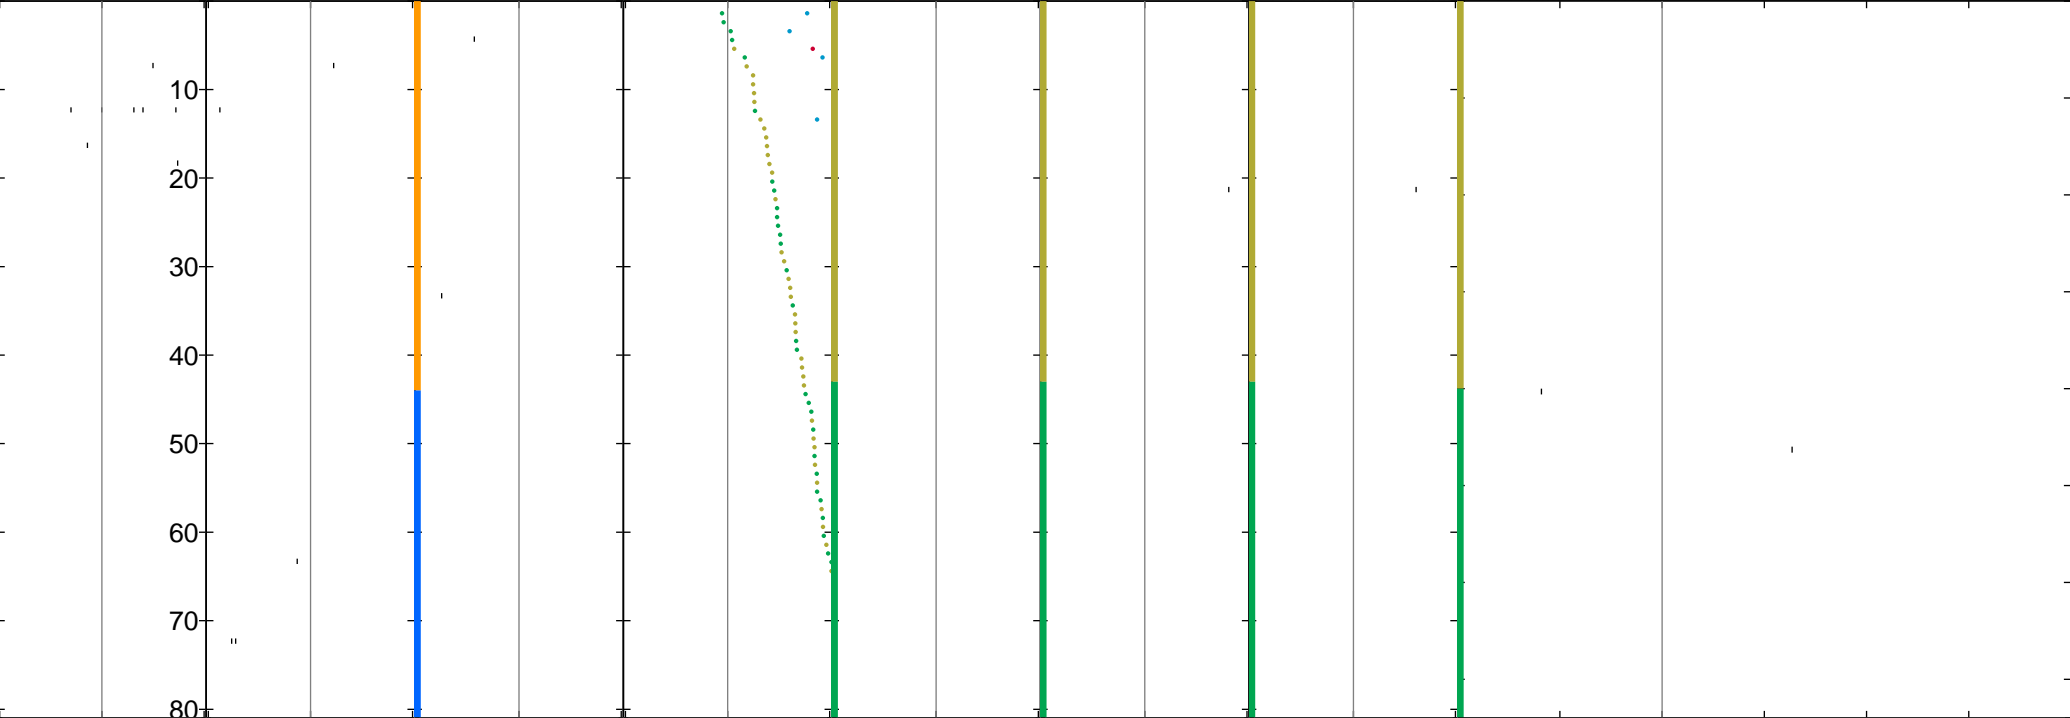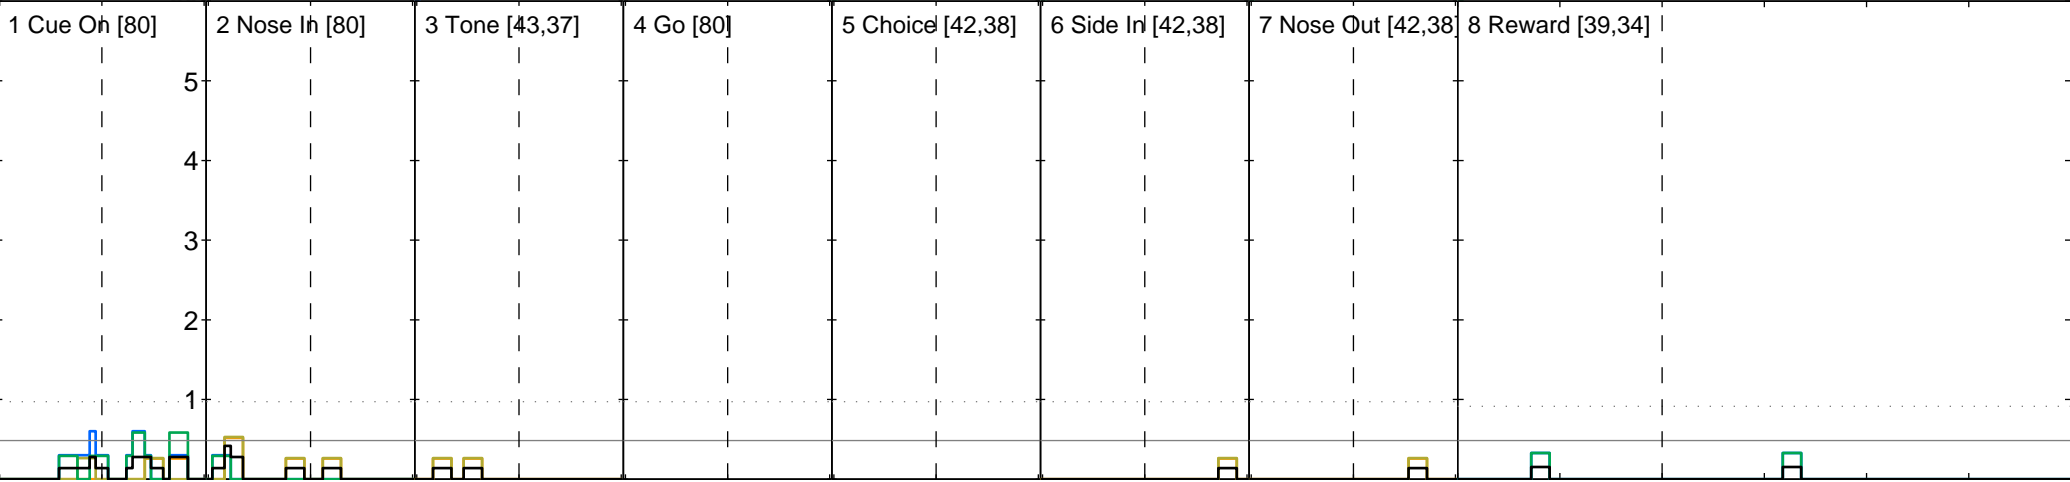

**Cell: C1220071114T05b**

AP: 1.4 ML: 2.1 DV: 7.2  
w: 2 n: 1151  $P_{ISI>2}$ : 0.95  
1/2pw: 248 $\mu$ s p->v: 986 $\mu$ s  
 $\beta_T$ : NaN  $\beta_D$ : NaN  
 $\beta_P$ : NaN SI: NaN  
Session FR: 0.189 Hz  
Pk Ev: None  
Pk FR: --

MSN

Waveform

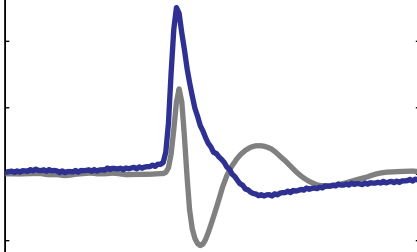

HP/PV

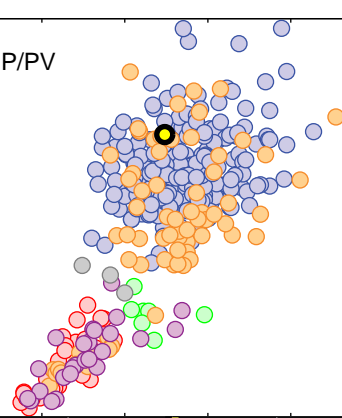

FR/PV

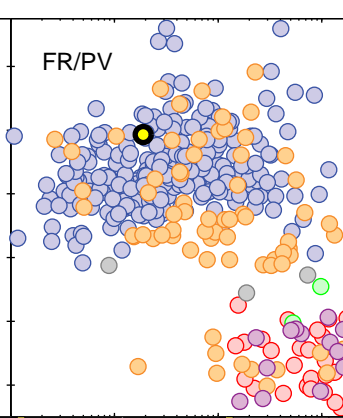

ISI Histogram [25]

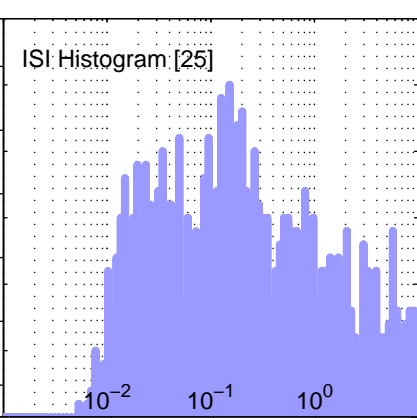

10

20

30

40

50

60

70

80

1 Cue On [80]

2 Nose In [80]

3 Tone [43,37]

4 Go [80]

5 Choice [42,38]

6 Side In [42,38]

7 Nose Out [42,38]

8 Reward [39,34]

5

4

3

2

1

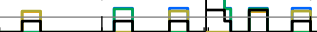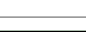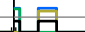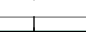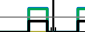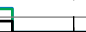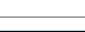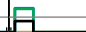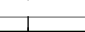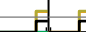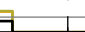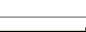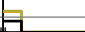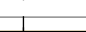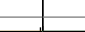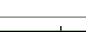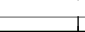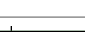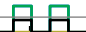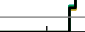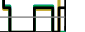

**Cell: C1220071115T05a**

AP: 1.4 ML: 2.1 DV: 7.3  
w: 3 n: 309  $P_{ISI>2}$ : 0.99  
1/2pw: 302 $\mu$ s p->v: 899 $\mu$ s  
 $\beta_T$ : NaN  $\beta_D$ : NaN  
 $\beta_P$ : NaN SI: NaN  
Session FR: 0.0441 Hz  
Pk Ev: None  
Pk FR: --

MSN

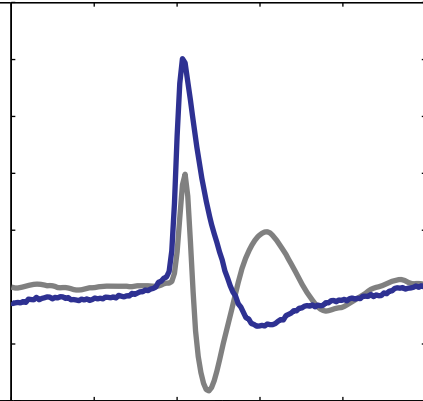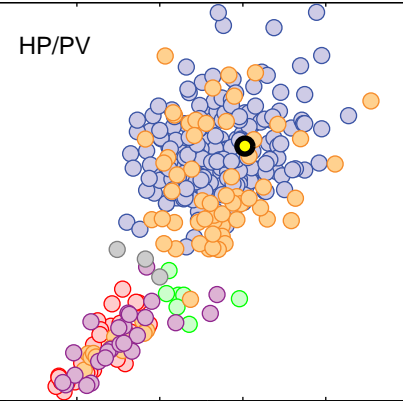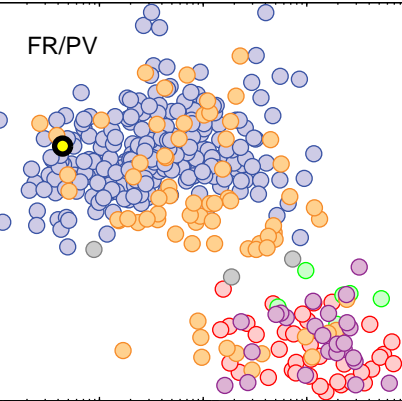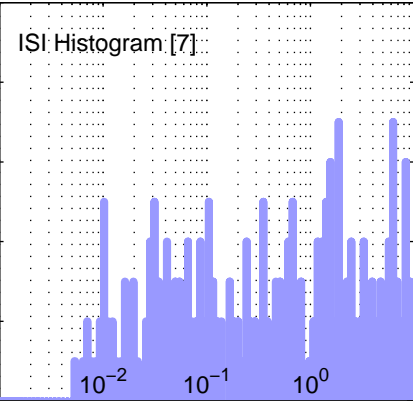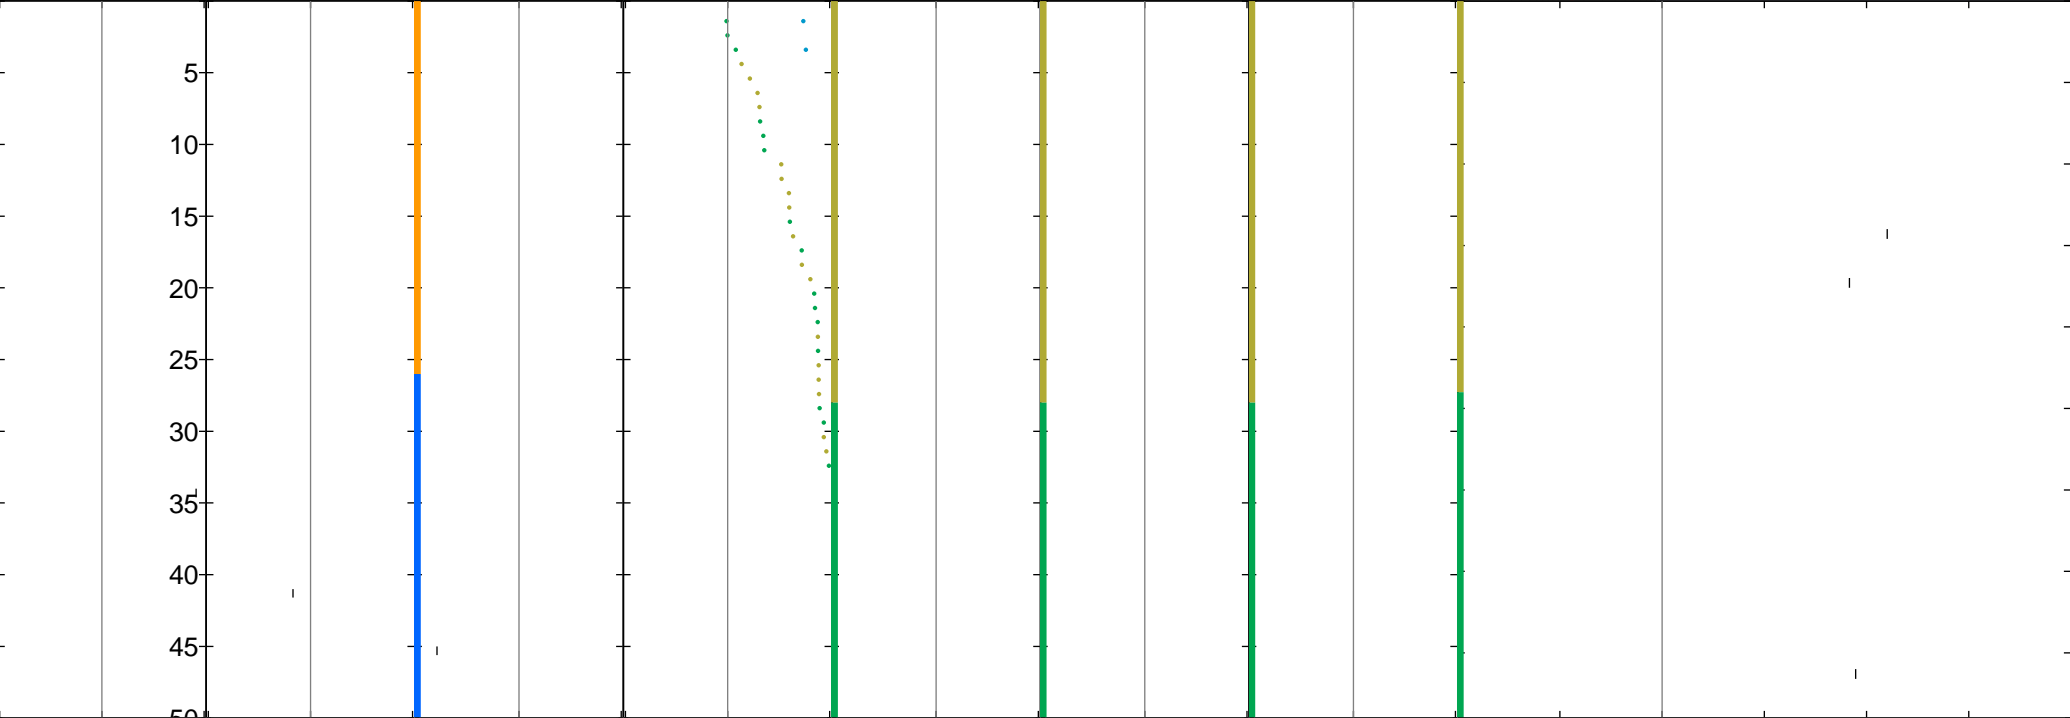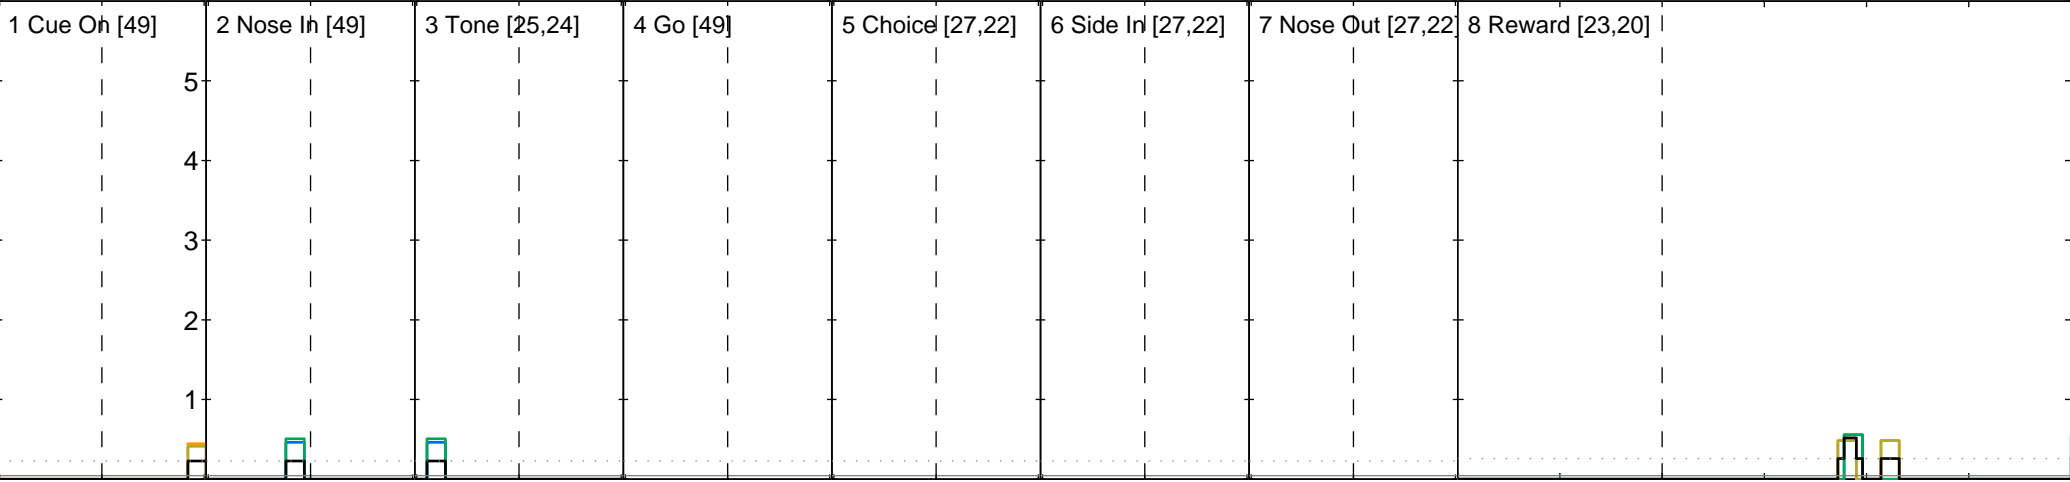

**Cell: C1220071115T05b**

AP: 1.4 ML: 2.1 DV: 7.3

w: 4 n: 1416  $P_{ISI>2}$ : 0.941/2pw: 336 $\mu$ s p->v: 990 $\mu$ s $\beta_T$ : NaN  $\beta_D$ : NaN $\beta_P$ : NaN SI: NaN

Session FR: 0.202 Hz

Pk Ev: None

Pk FR: --

MSN

Waveform

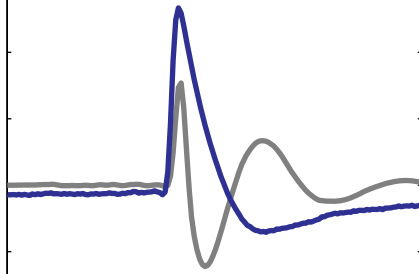

HP/PV

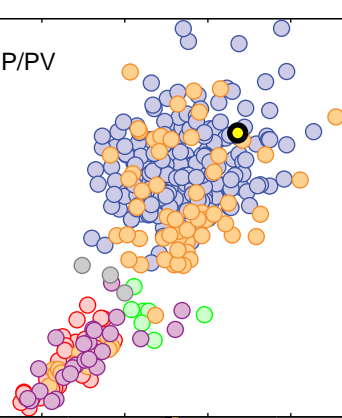

FR/PV

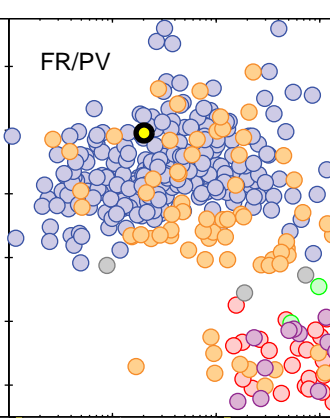

ISI Histogram [28]

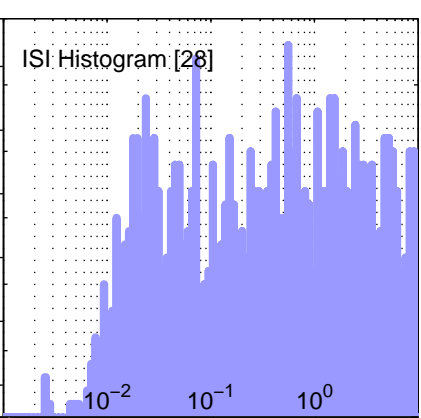5  
10  
15  
20  
25  
30  
35  
40  
45  
50

1 Cue On [49]

2 Nose In [49]

3 Tone [25,24]

4 Go [49]

5 Choice [27,22]

6 Side In [27,22]

7 Nose Out [27,22]

8 Reward [23,20]

5  
4  
3  
2  
1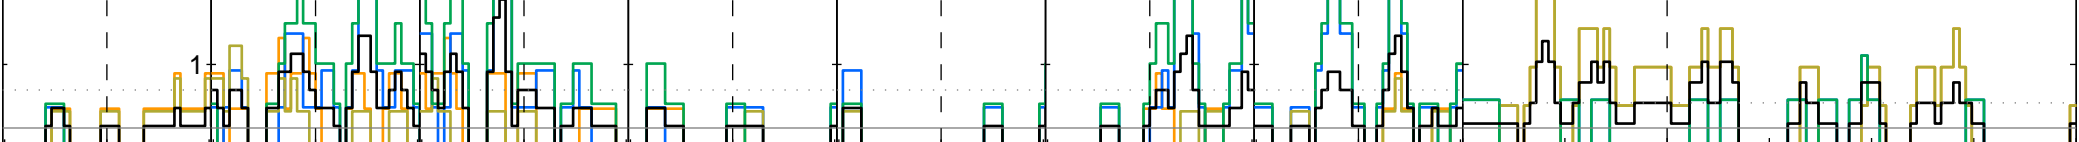



**Cell: C1220071115T05c**

AP: 1.4 ML: 2.1 DV: 7.3  
w: 2 n: 47  $P_{ISI>2}$ : 1  
1/2pw: 296 $\mu$ s p->v: 981 $\mu$ s  
 $\beta_T$ : NaN  $\beta_D$ : NaN  
 $\beta_P$ : NaN SI: NaN  
Session FR: 0.0108 Hz  
Pk Ev: None  
Pk FR: --

MSN

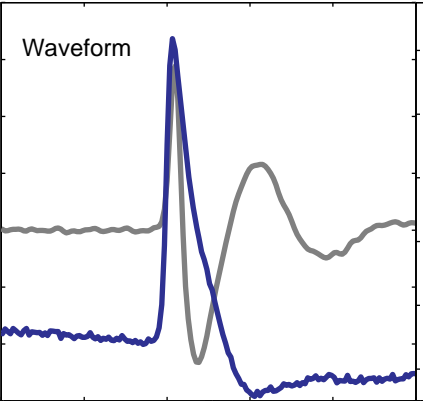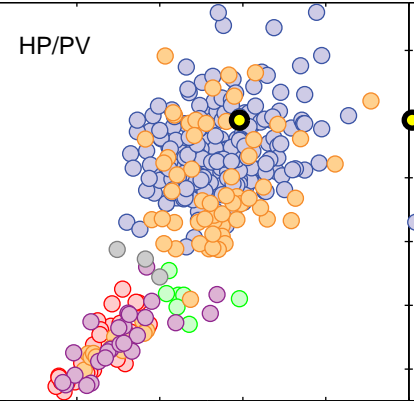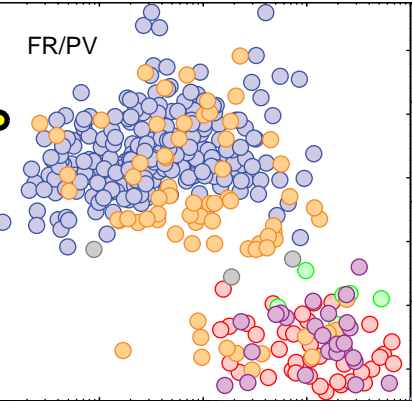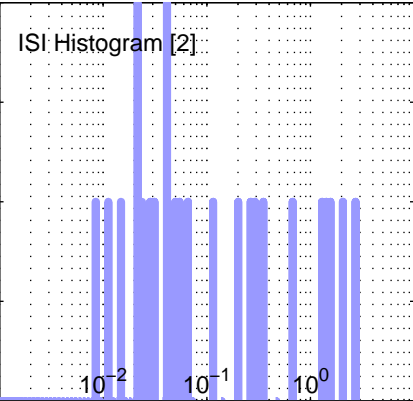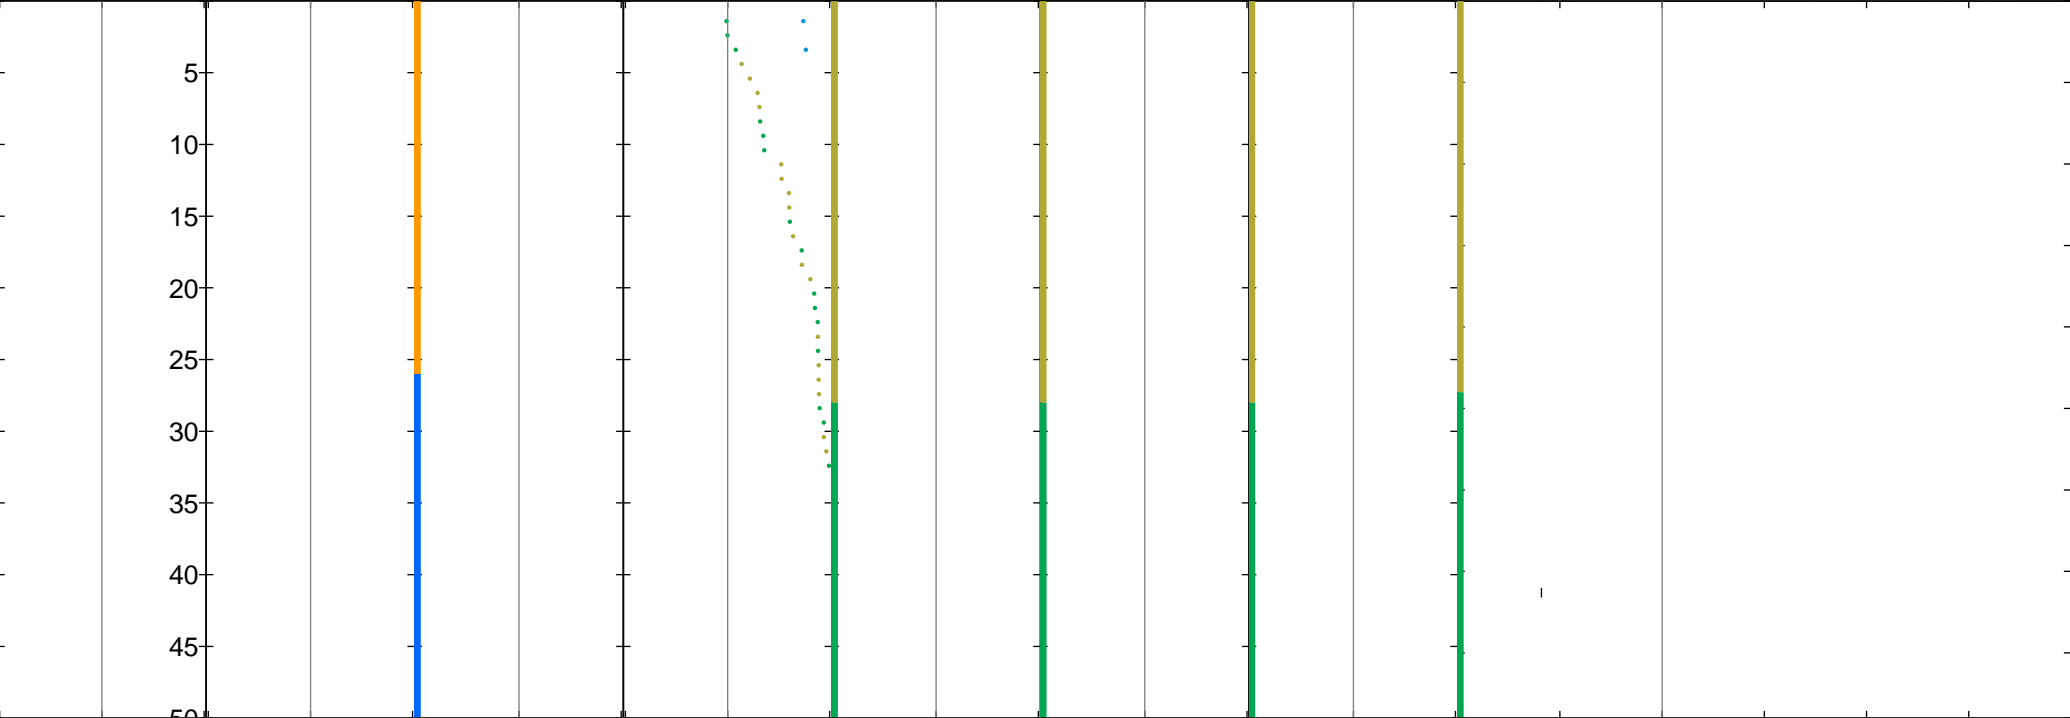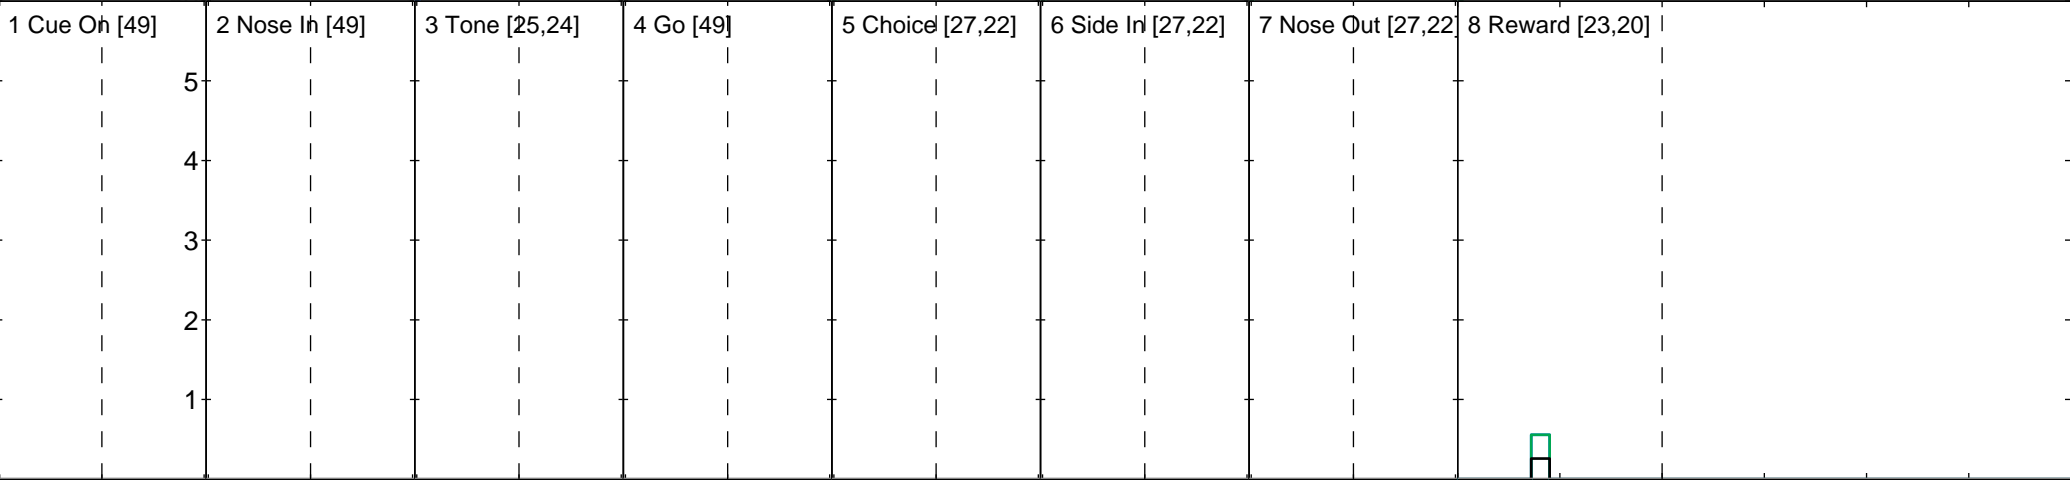

**Cell: C1220071126T05a**

AP: 1.4 ML: 2.1 DV: 8.1  
w: 3 n: 250  $P_{ISI>2}$ : 0.98  
1/2pw: 296 $\mu$ s p->v: 992 $\mu$ s  
 $\beta_T$ : NaN  $\beta_D$ : NaN  
 $\beta_P$ : NaN SI: NaN  
Session FR: 0.142 Hz  
Pk Ev: None  
Pk FR: --

**MSN**

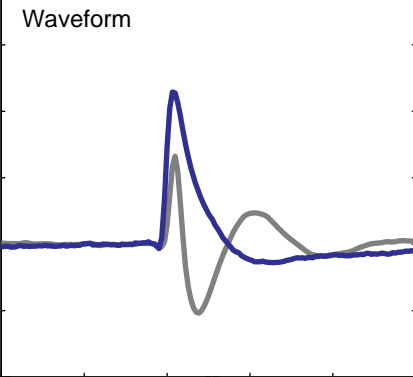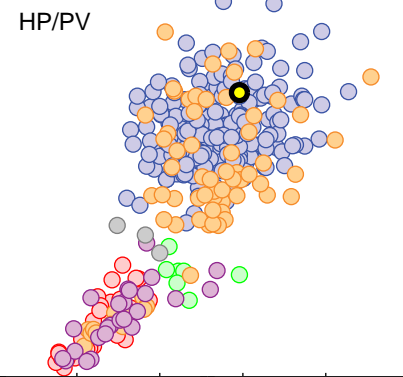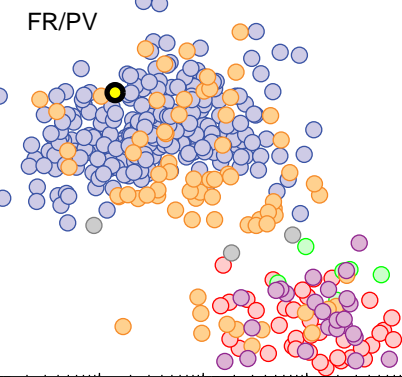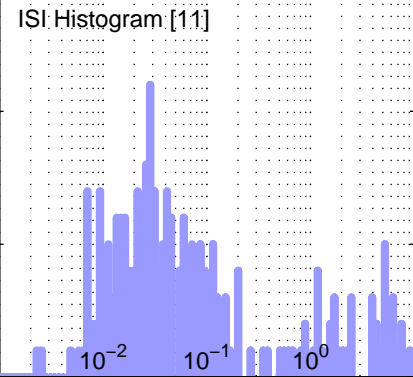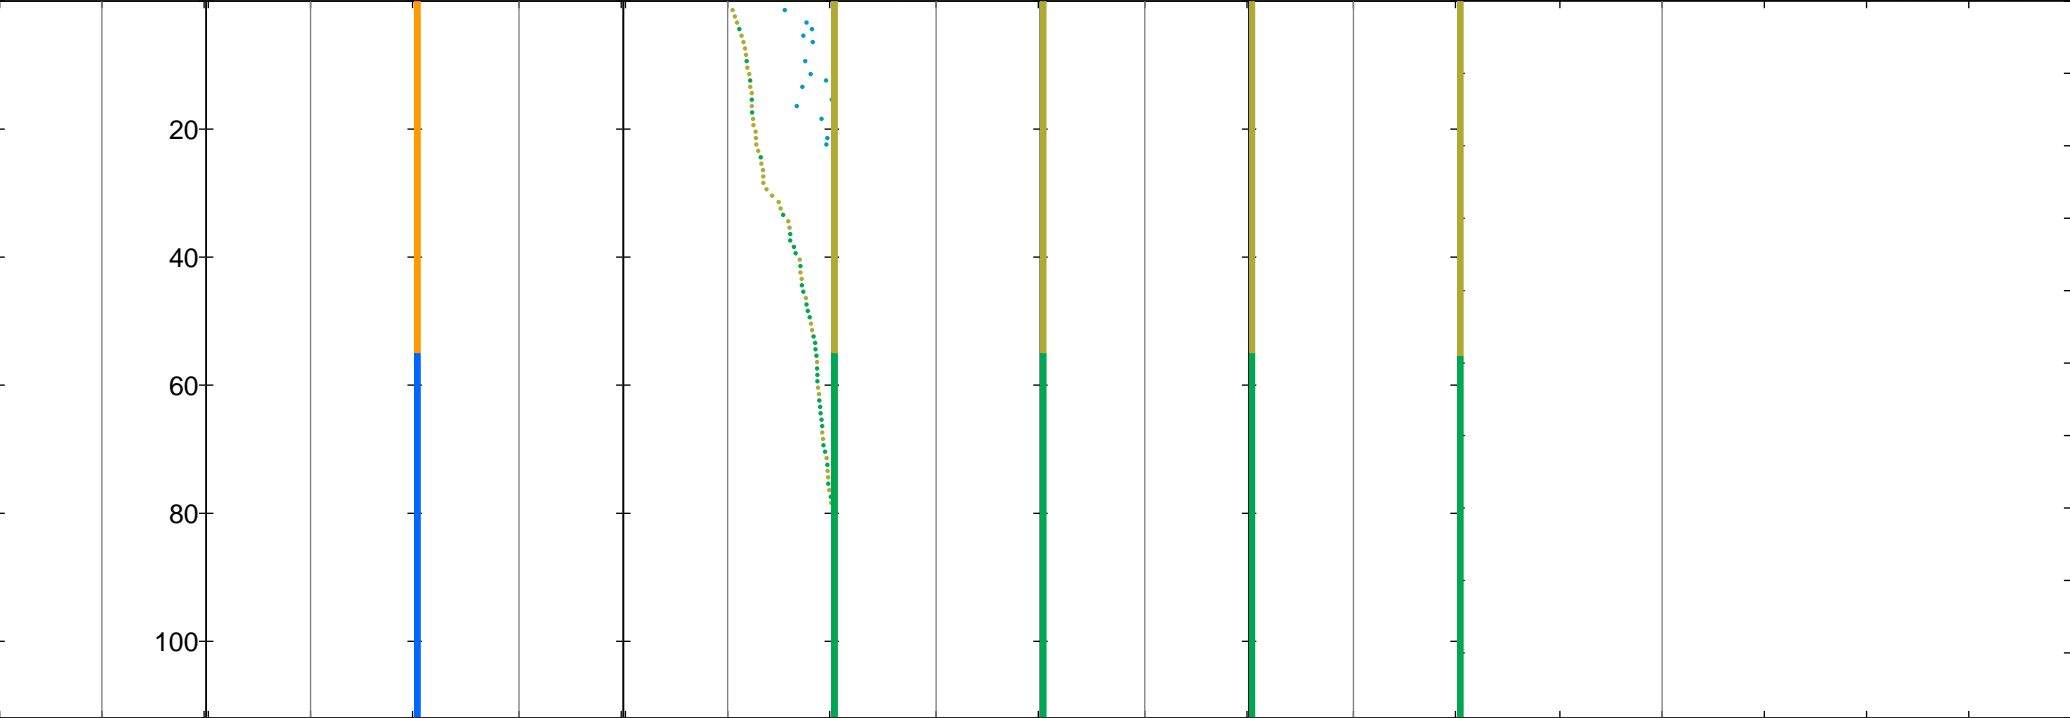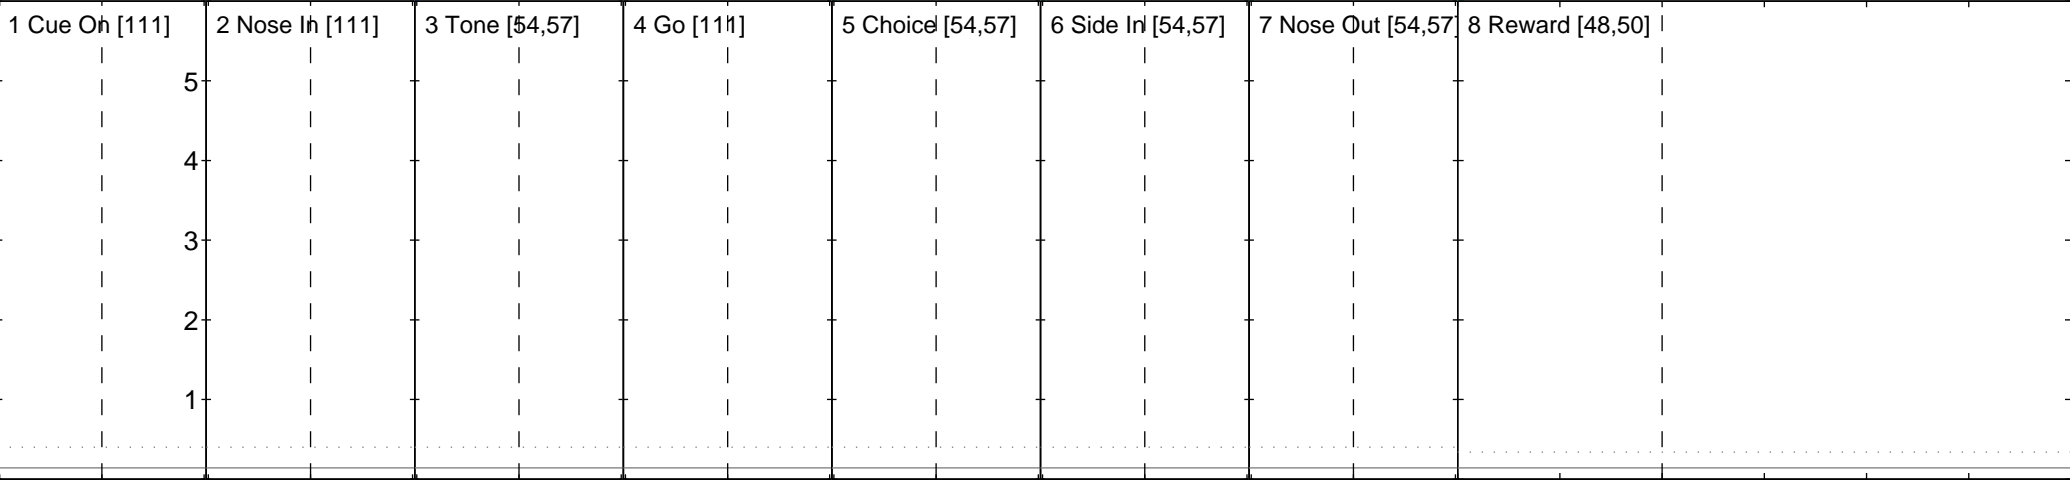

**Cell: C1220071126T05b**

AP: 1.4 ML: 2.1 DV: 8.1  
w: 2 n: 242  $P_{ISI>2}$ : 0.99  
1/2pw: 232 $\mu$ s p->v: 766 $\mu$ s  
 $\beta_T$ : NaN  $\beta_D$ : NaN  
 $\beta_P$ : NaN SI: NaN  
Session FR: 0.0471 Hz  
Pk Ev: None  
Pk FR: --

MSN

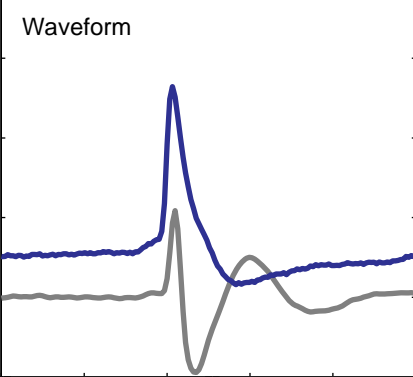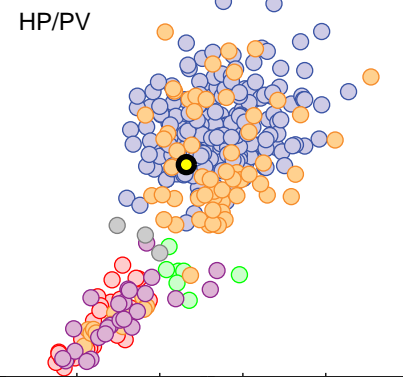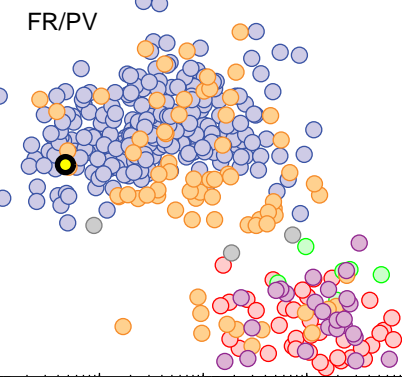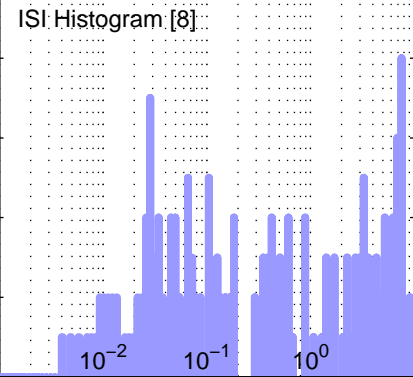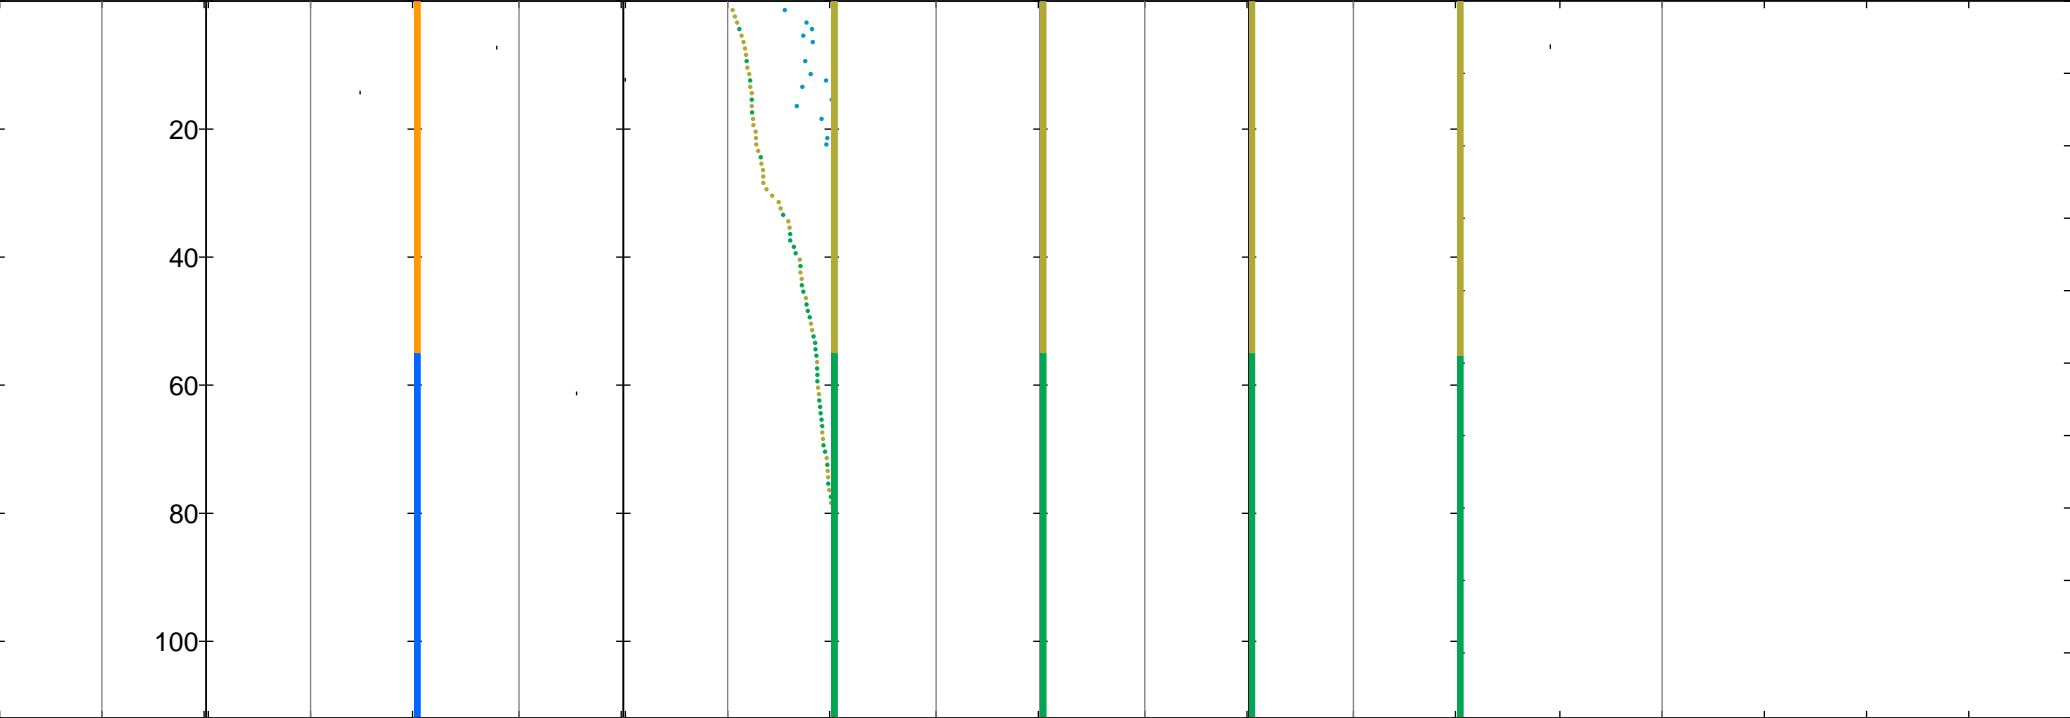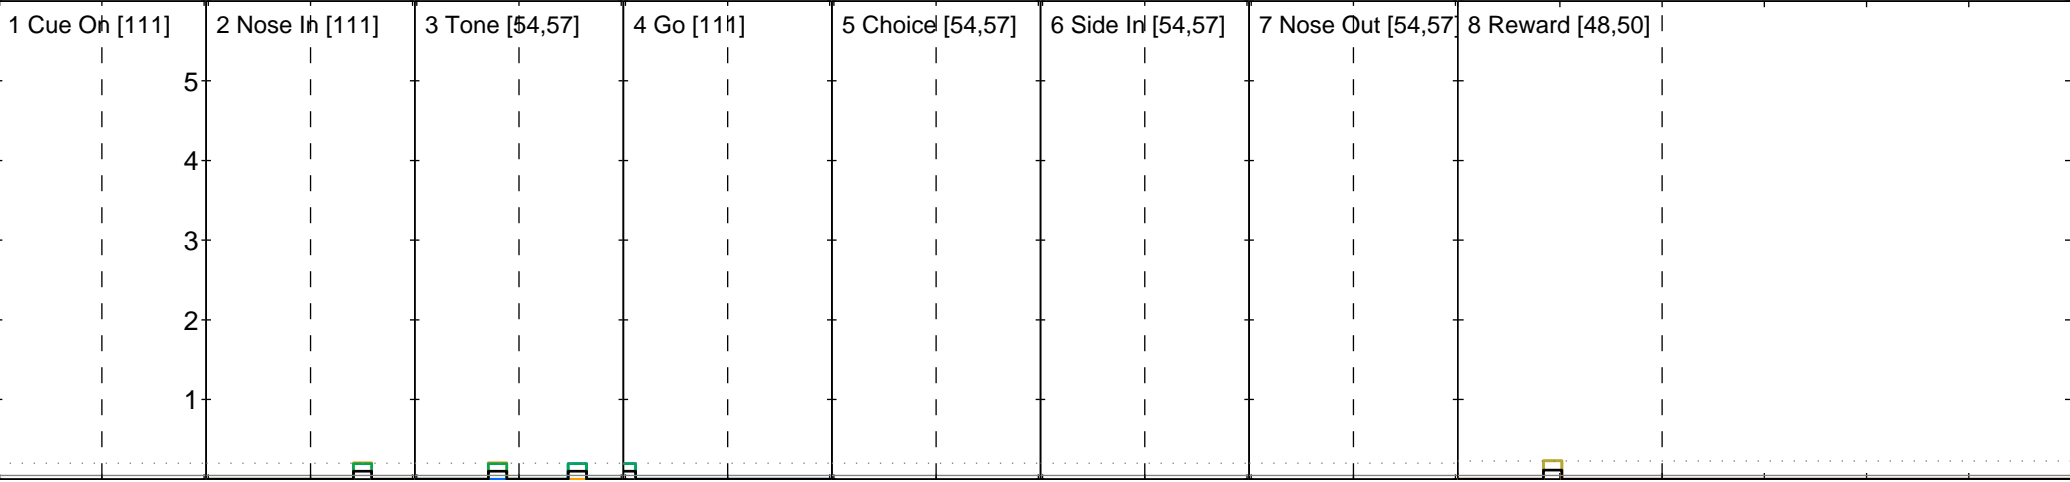

Cell: C0320070625T09a

AP: 1.6 ML: 3.7 DV: 5.5

w: 1 n: 101480  $P_{ISI>2}$ : 0.0016

1/2pw: 222 $\mu$ s p $\rightarrow$ v: 432 $\mu$ s

$\beta_T$ : -3  $\beta_D$ : -3.3

$\beta_P$ : 3.1 SI: -0.28

Session FR: 23 Hz

Pk Ev: 2 - Nose in (Tone1)

Pk FR: 49.8Hz (0.09s) ○

Waveform

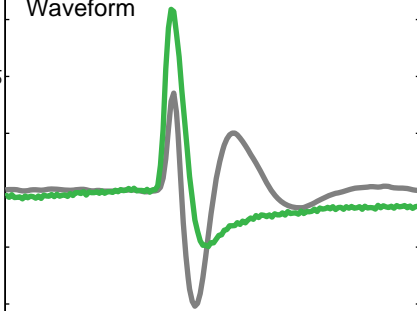

HP/PV

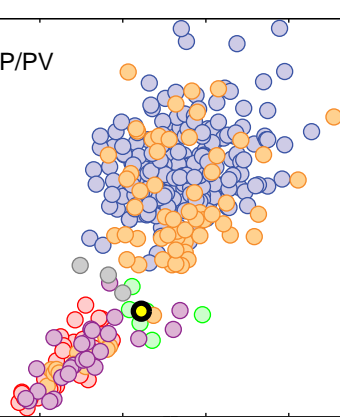

FR/PV

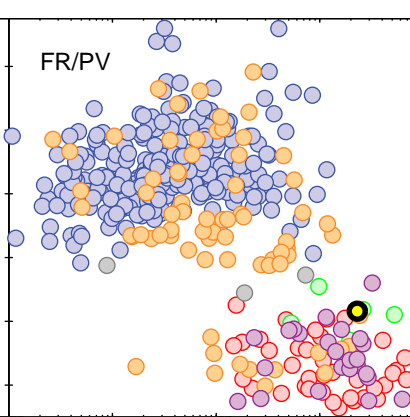

ISI Histogram [4194]

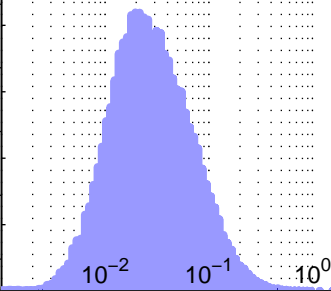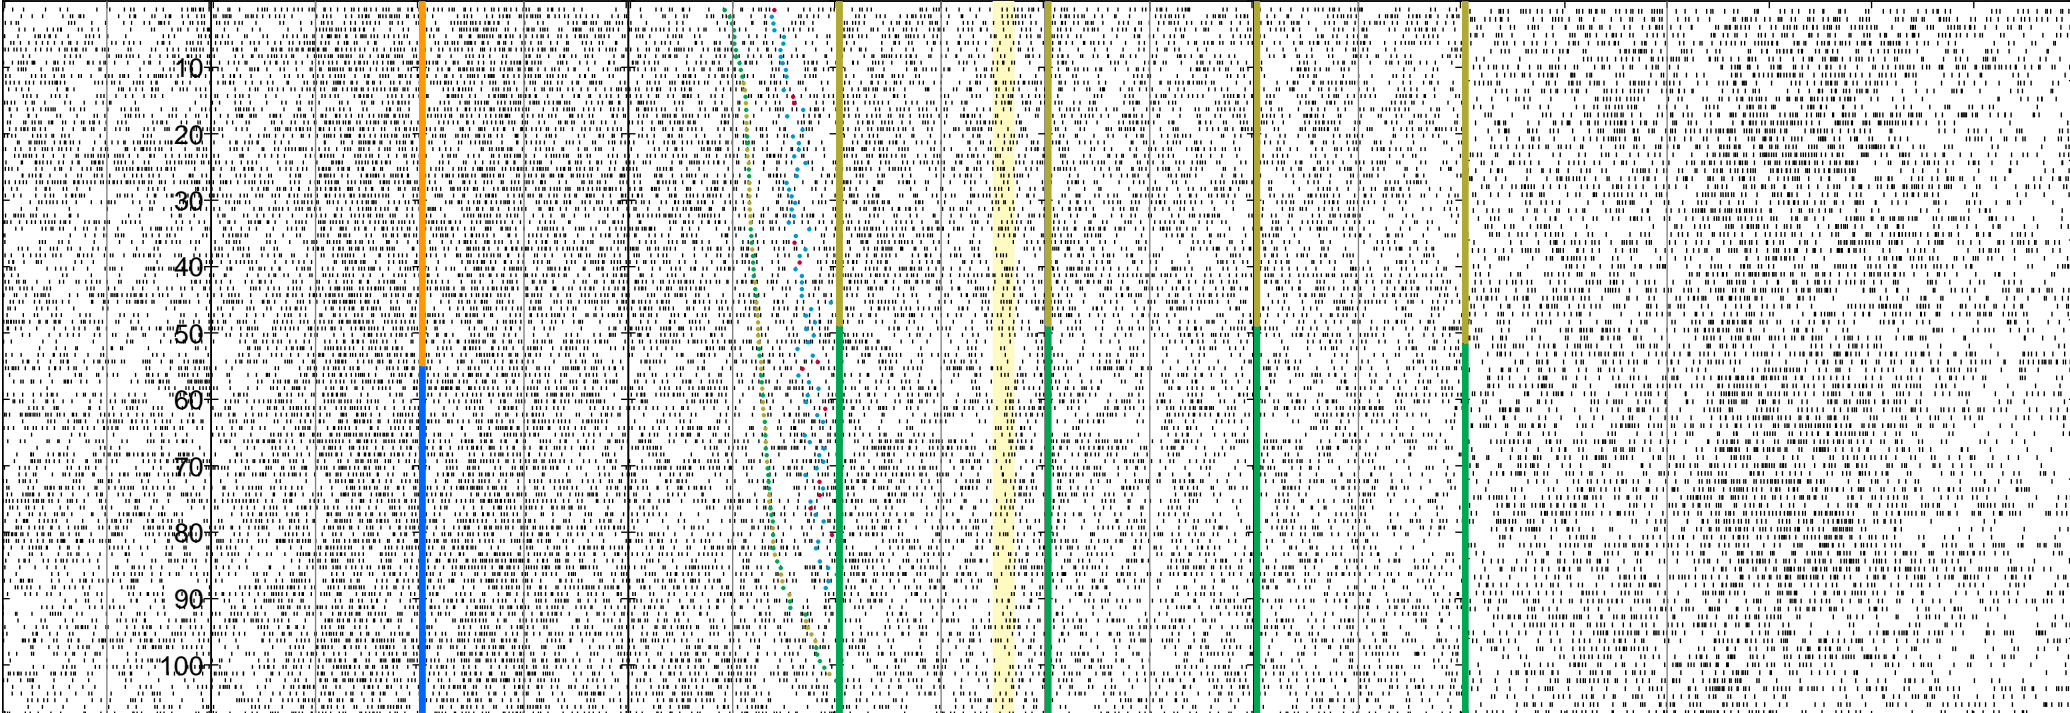

1 Cue On [107]

2 Nose In [107]

3 Tone [54,53]

4 Go [107]

5 Choice [48,59]

6 Side In [48,59]

7 Nose Out [48,59]

8 Reward [42,47]

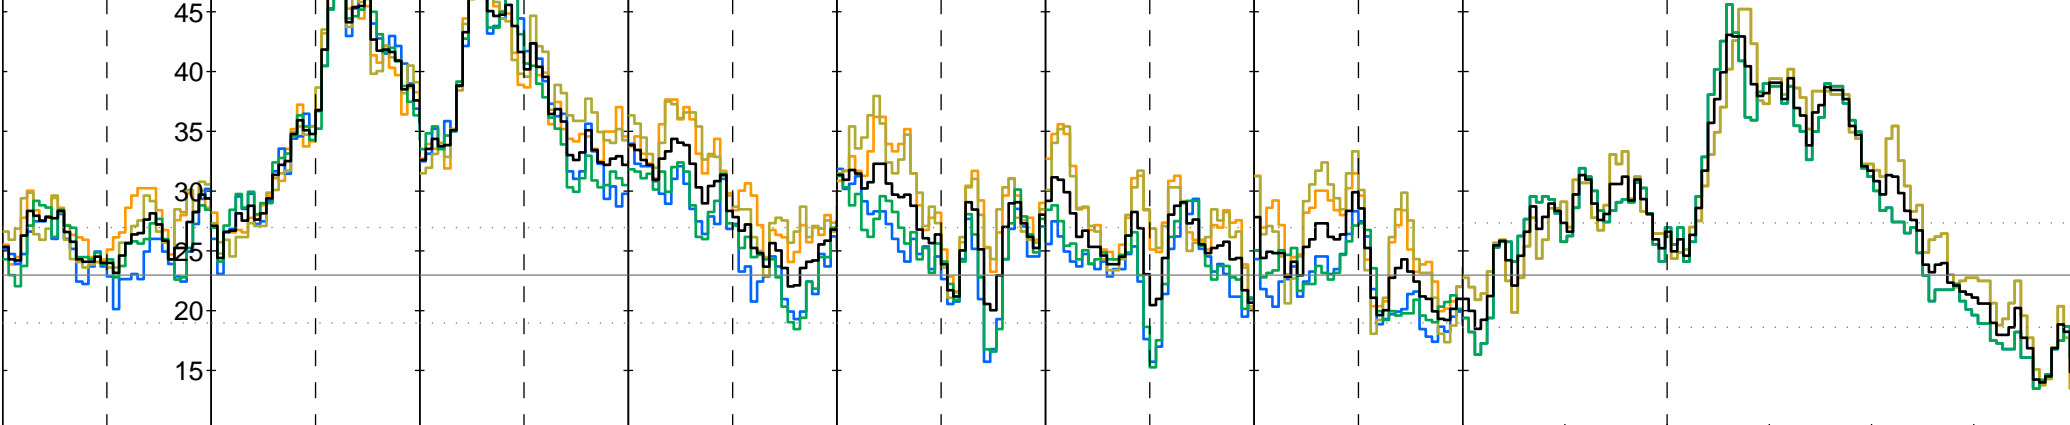

Cell: C0520070402R02b

AP: 0.24 ML: 4 DV: 6.2

w: 2 n: 88997  $P_{ISI>2}$ : 0.023

1/2pw: 235 $\mu$ s p $\rightarrow$ v: 341 $\mu$ s

$\beta_T$ : 3  $\beta_D$ : 6

$\beta_P$ : -3.3 SI: 0.21

Session FR: 19.5 Hz

Pk Ev: 5 - Choice (Ipsi)

Pk FR: 67.6Hz (-0.03s) ○

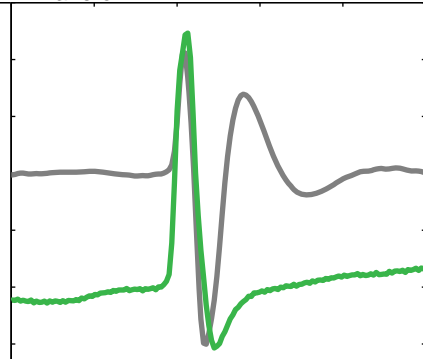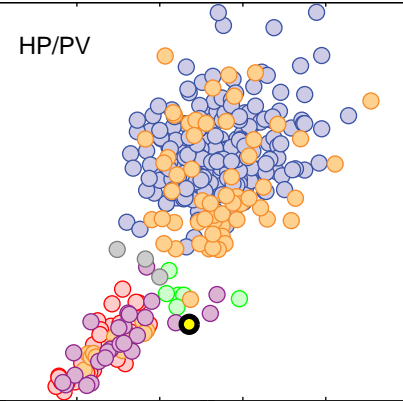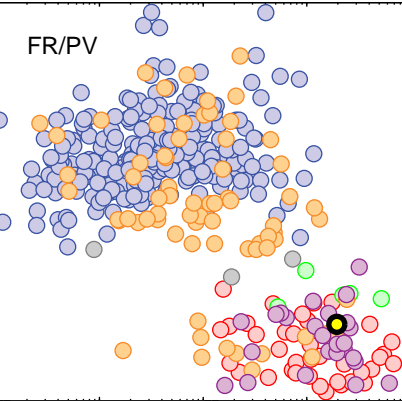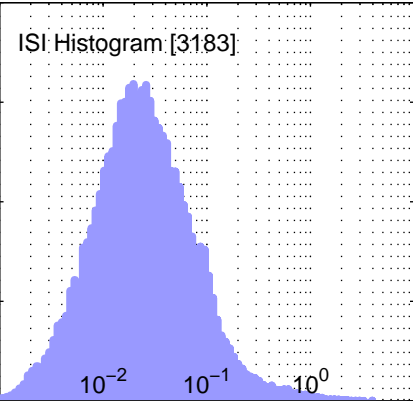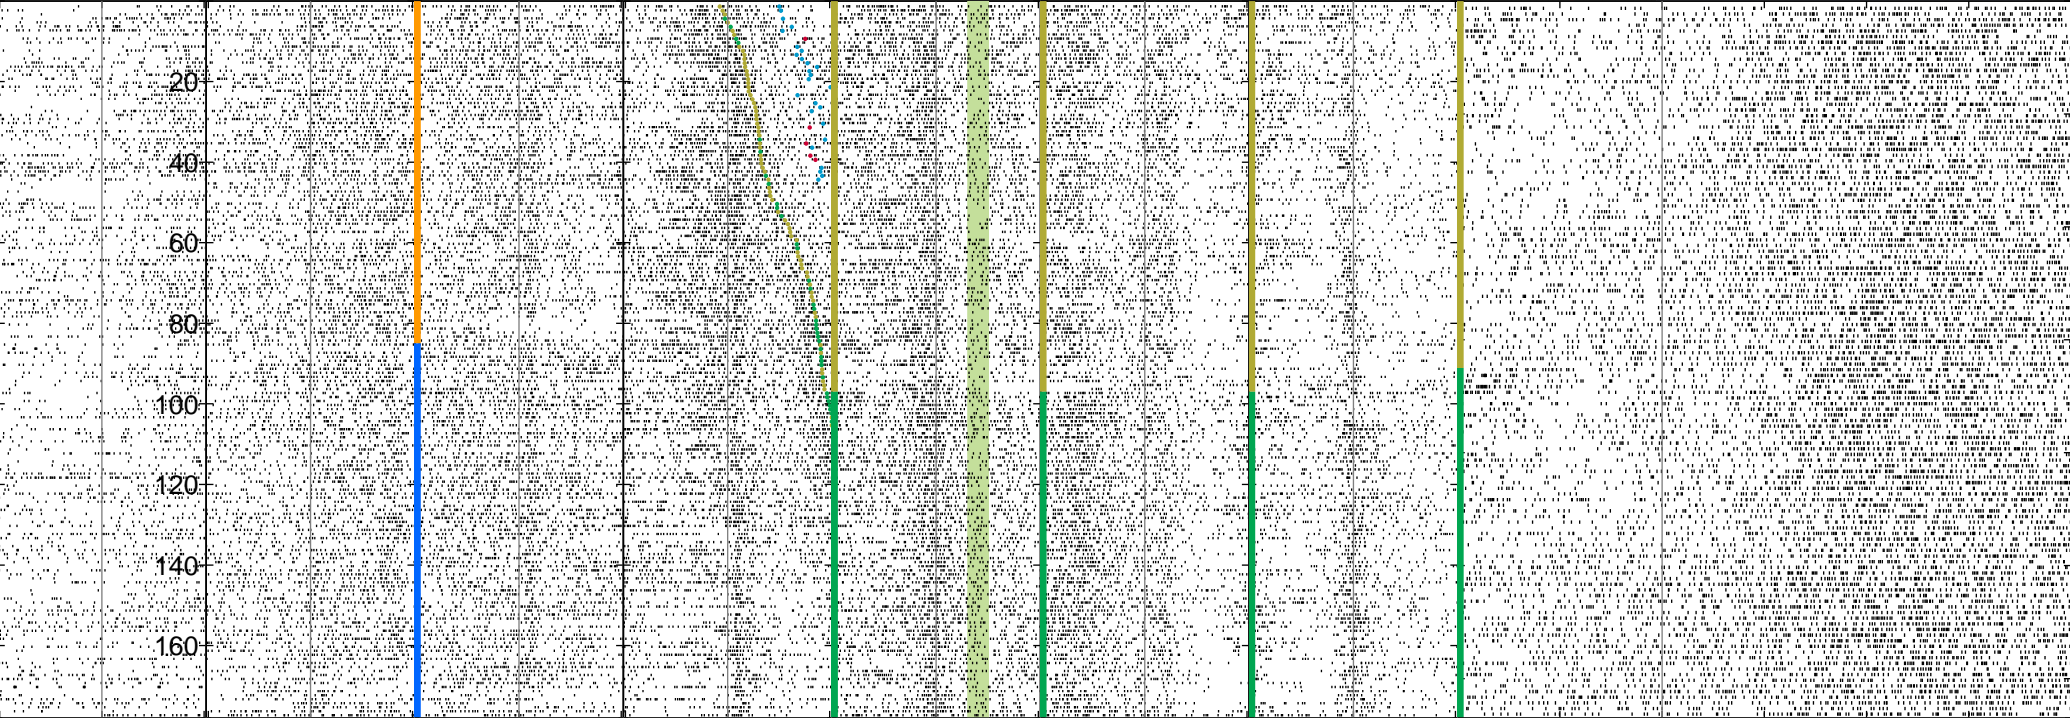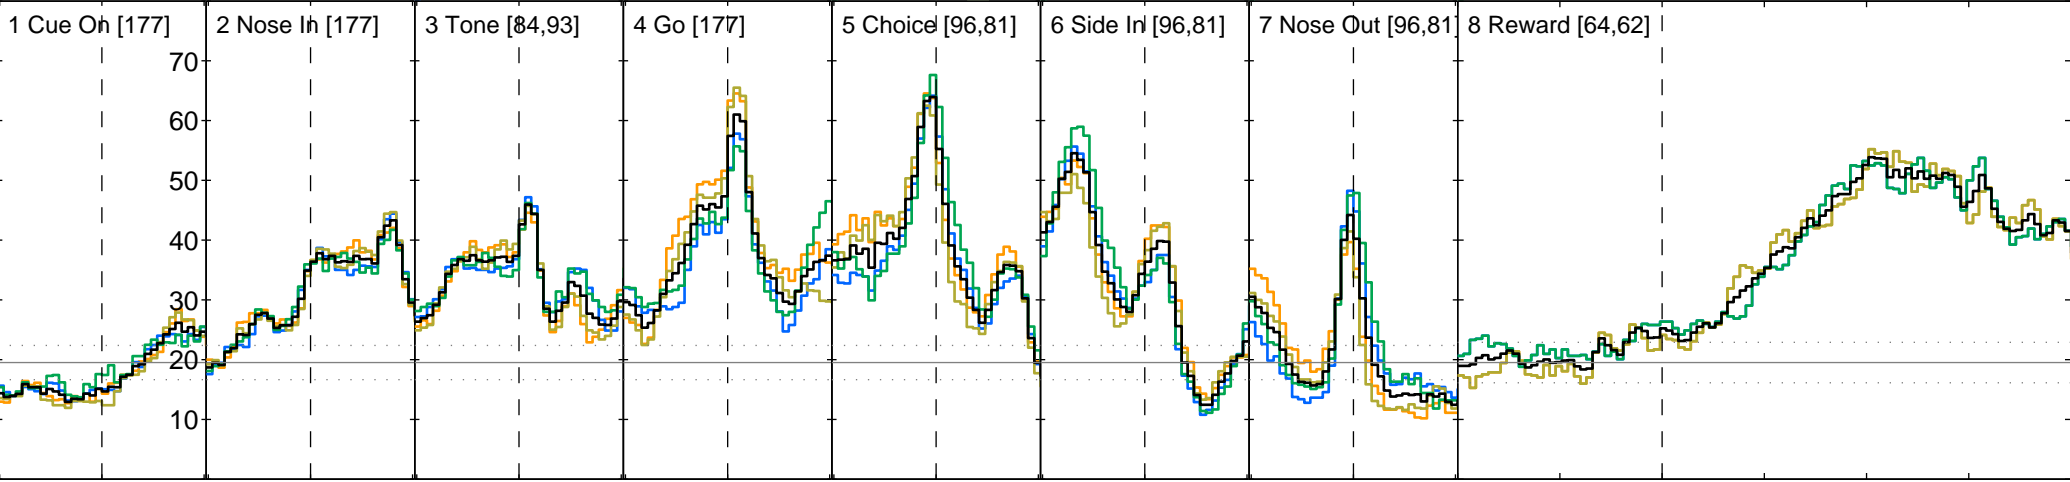

Cell: C0320070704T11a

AP: -0.96 ML: 3.7 DV: 7.9

w: 2 n: 84551  $P_{ISI>2}$ : 0

1/2pw: 208 $\mu$ s p->v: 437 $\mu$ s

$\beta_T$ : 3  $\beta_D$ : -3.9

$\beta_P$ : 3.4 SI: -0.16

Session FR: 26 Hz

Pk Ev: 5 - Choice (Tone2)

Pk FR: 39.8Hz (1.11s) ○

Waveform

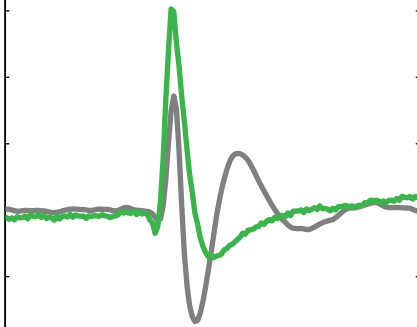

HP/PV

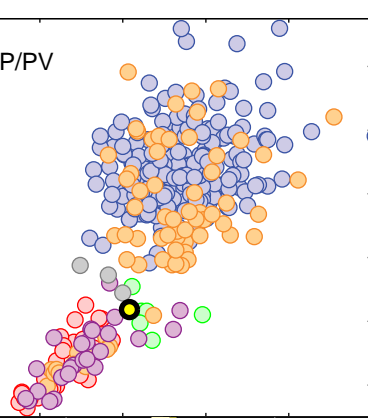

FR/PV

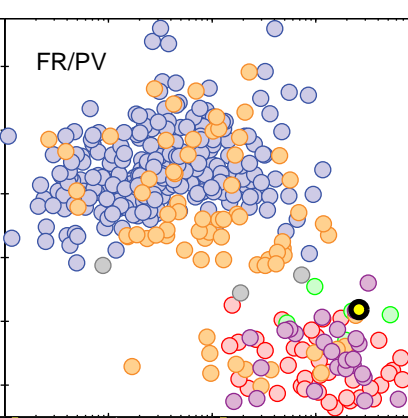

ISI Histogram [3684]

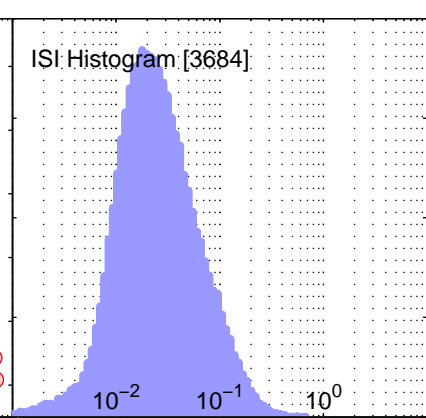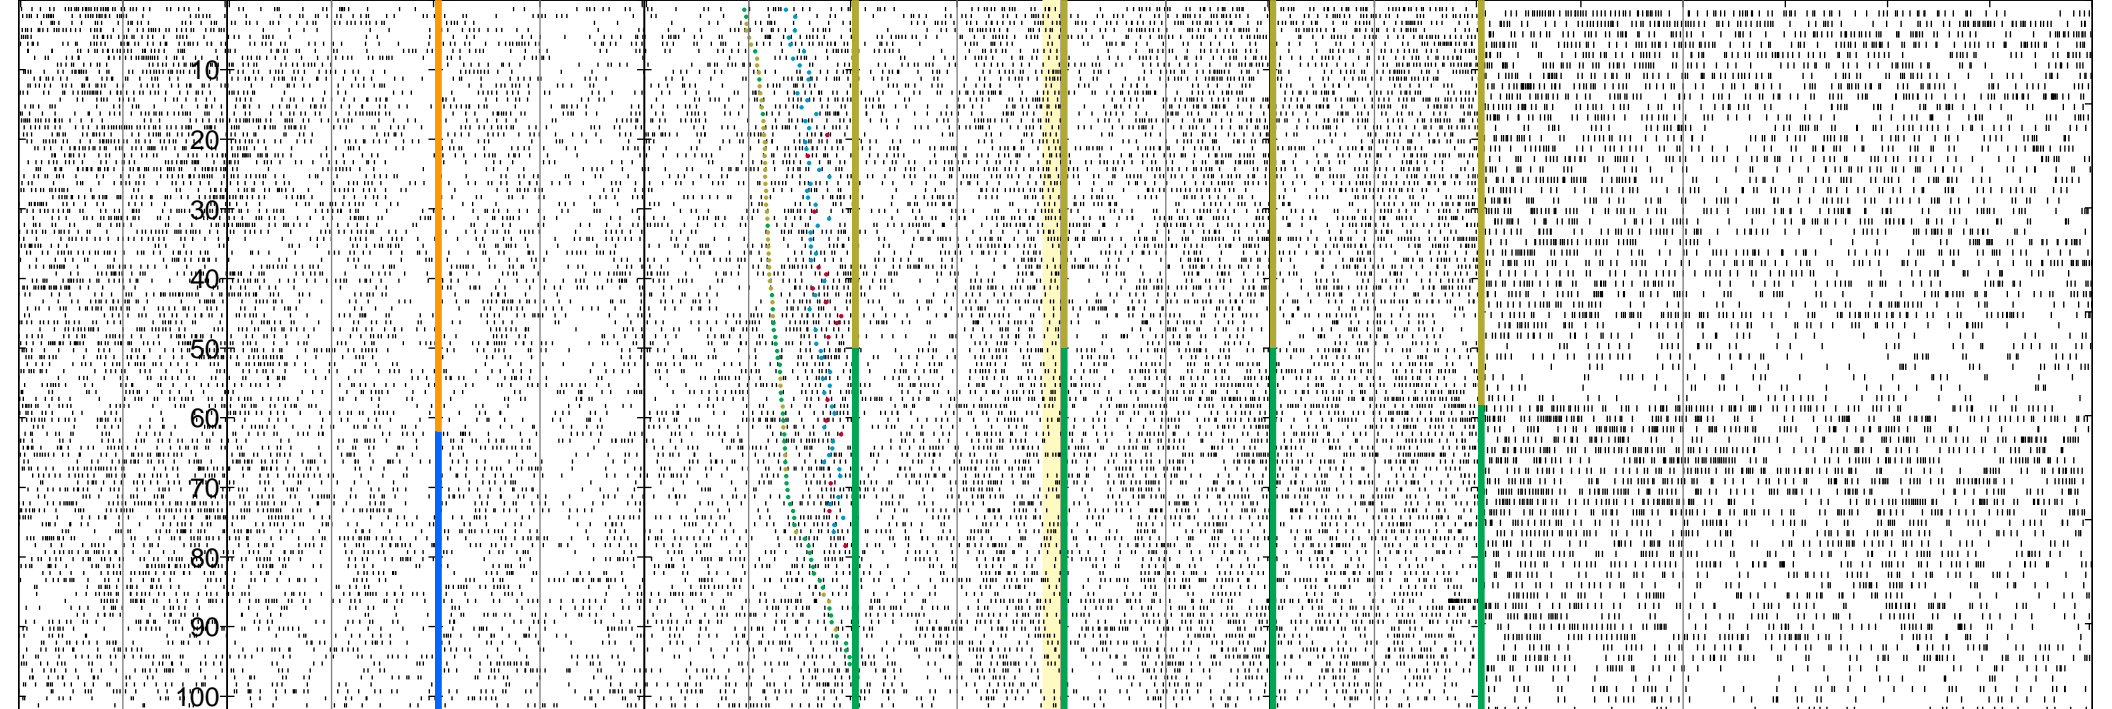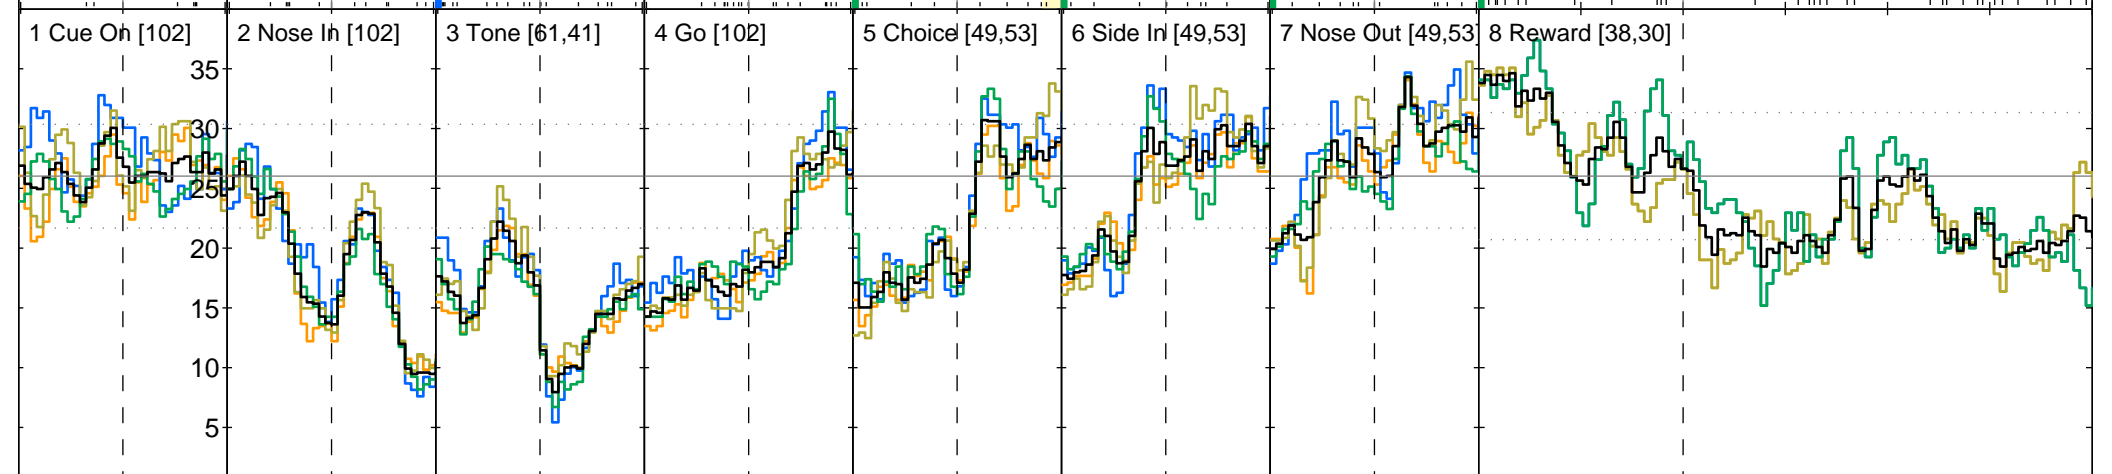



Cell: C0520070416T07b

AP: 1.3 ML: 3.4 DV: 4.5

w: 2 n: 99059  $P_{ISI>2}$ : 0.017

1/2pw: 229 $\mu$ s p $\rightarrow$ v: 432 $\mu$ s

$\beta_T$ : 2.8  $\beta_D$ : -3.8

$\beta_P$ : 4.2 SI: -0.22

Session FR: 22.3 Hz

Pk Ev: 8 - Reward (T2/Ipsi)

Pk FR: 59.8Hz (-0.97s) ○

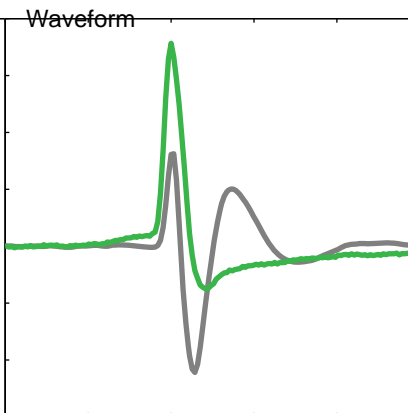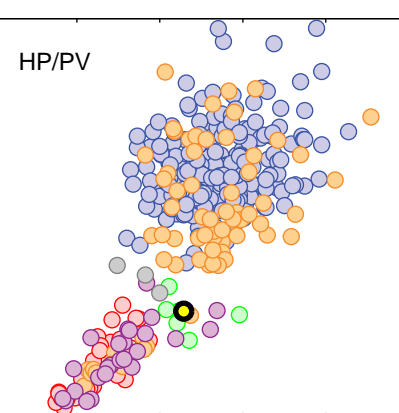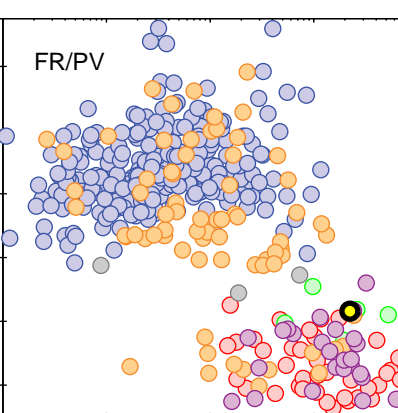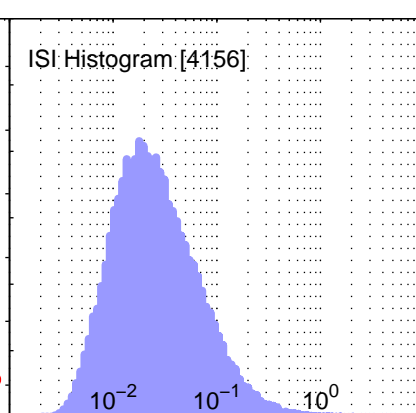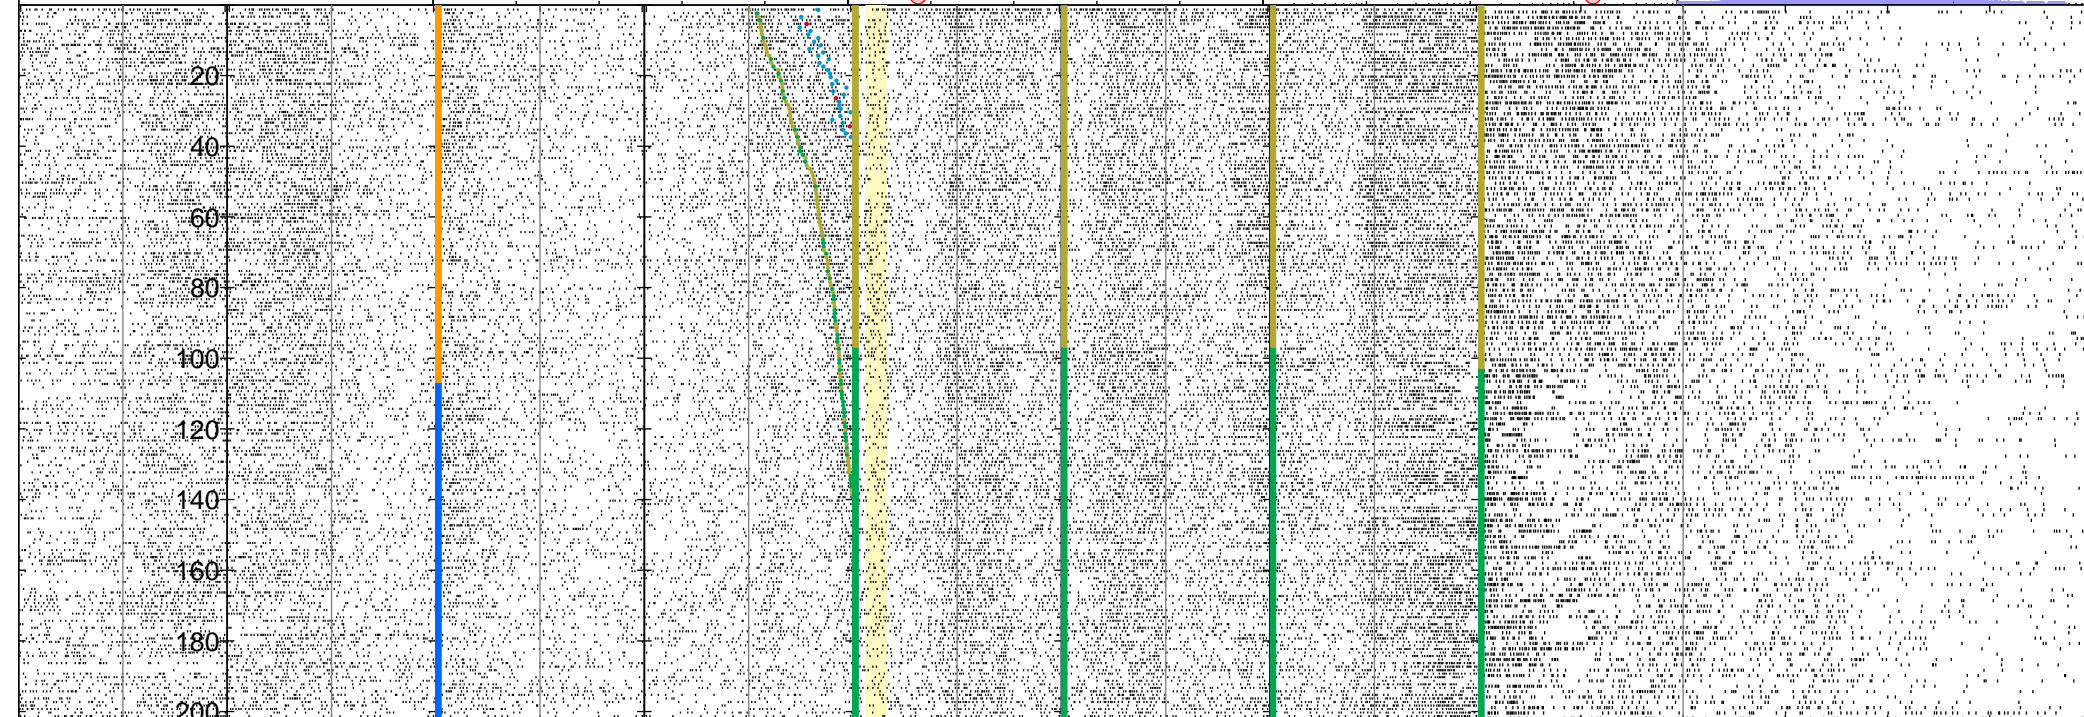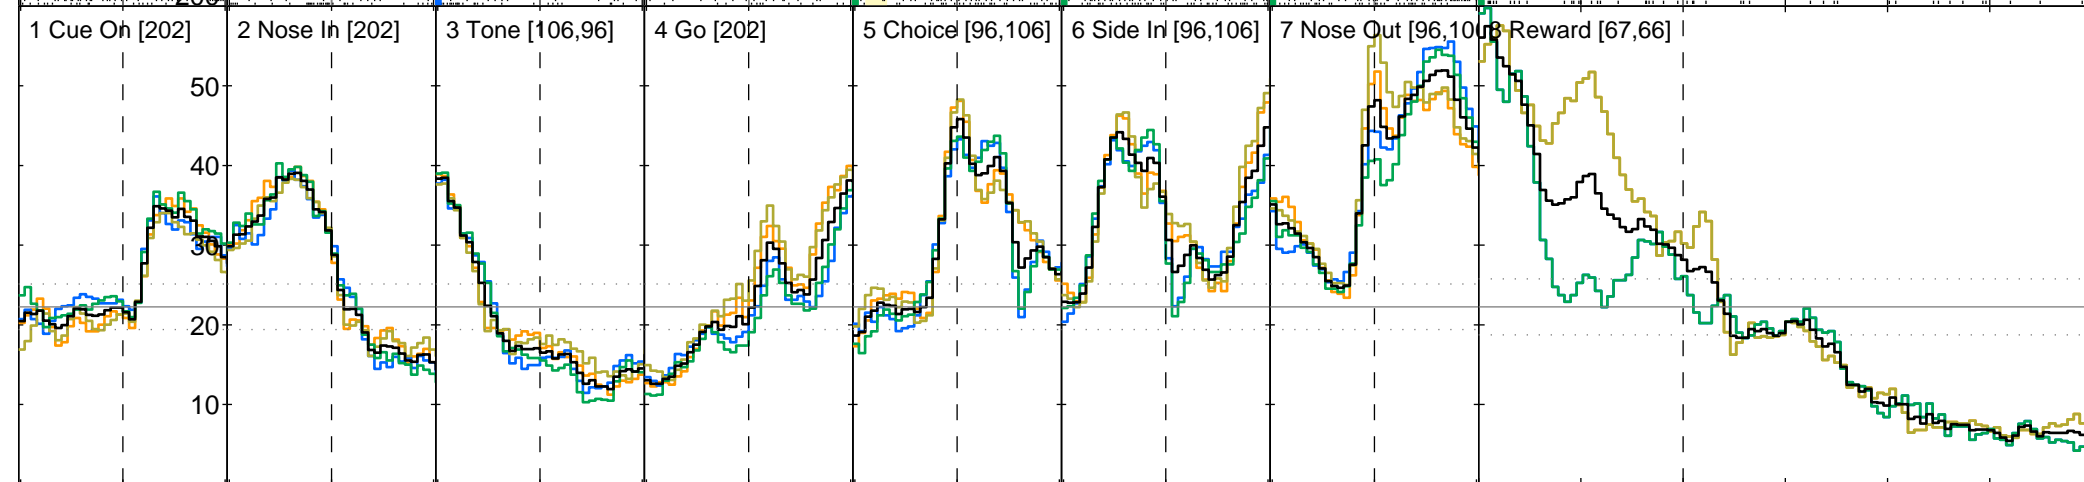

Cell: C0320070703T09a

AP: 1.6 ML: 3.7 DV: 6.6

w: 3 n: 205059 P<sub>ISI>2</sub>: 0

1/2pw: 296μs p->v: 421μs

β<sub>T</sub>: 3.3 β<sub>D</sub>: -4.9

β<sub>P</sub>: 3.6 SI: -0.15

Session FR: 52.6 Hz

Pk Ev: 8 - Reward (T1/Con)

Pk FR: 104Hz (-0.22s) ○

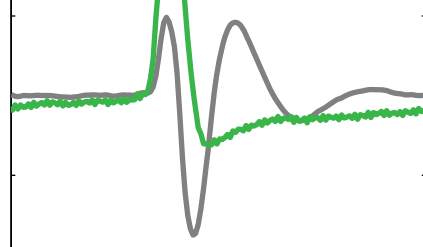

HP/PV

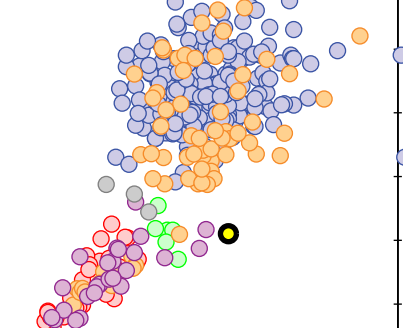

FR/PV

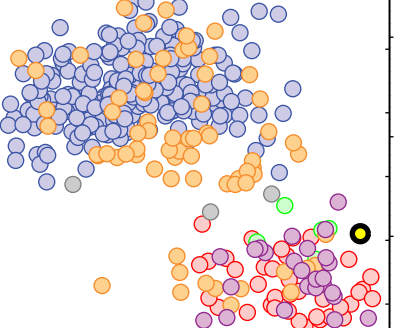

ISI Histogram [15385]

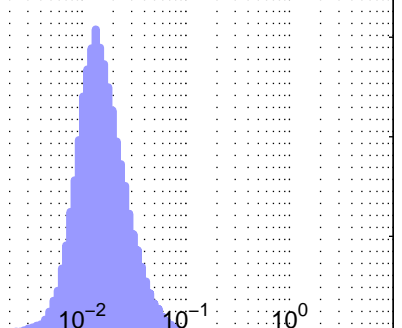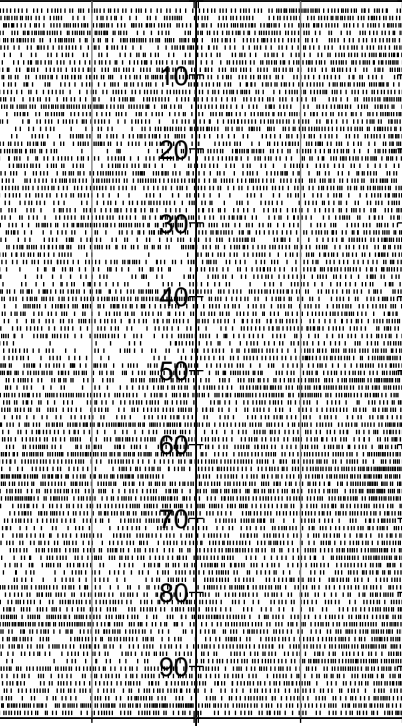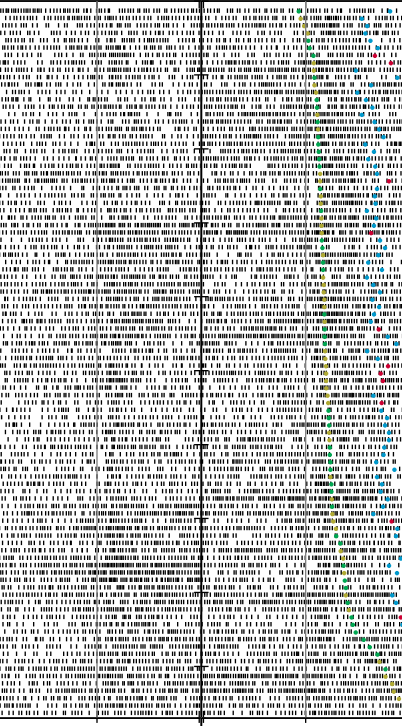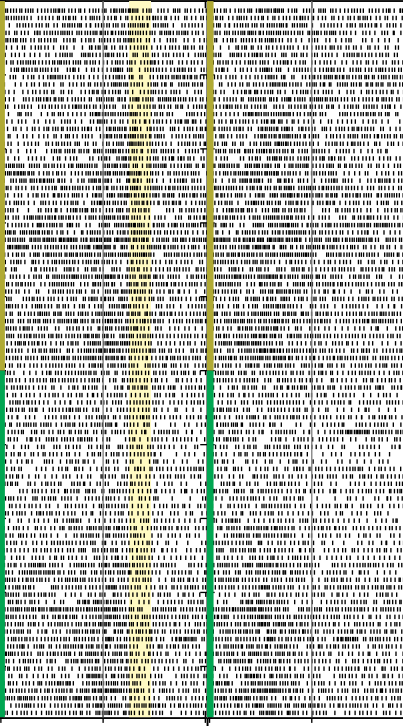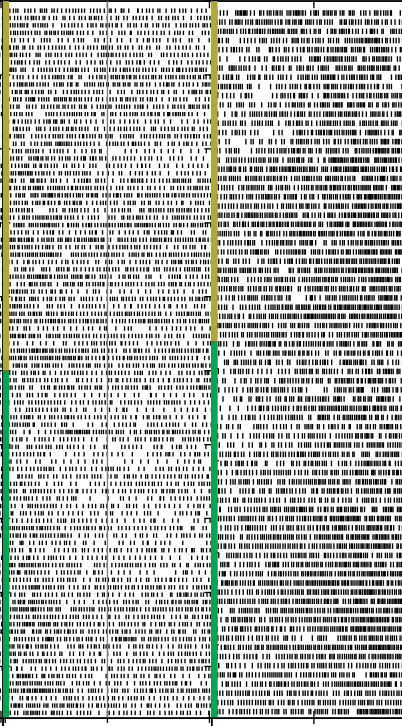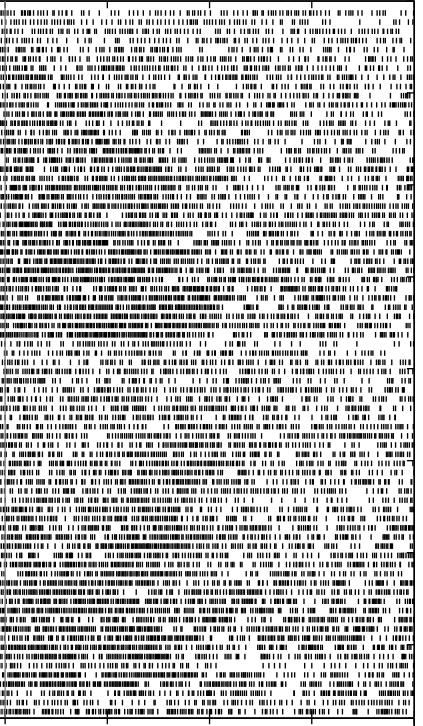

1 Cue On [96]    2 Nose In [96]    3 Tone [42,54]    4 Go [96]    5 Choice [49,47]    6 Side n [49,47]    7 Nose Out [49,47]    8 Reward [36,41]

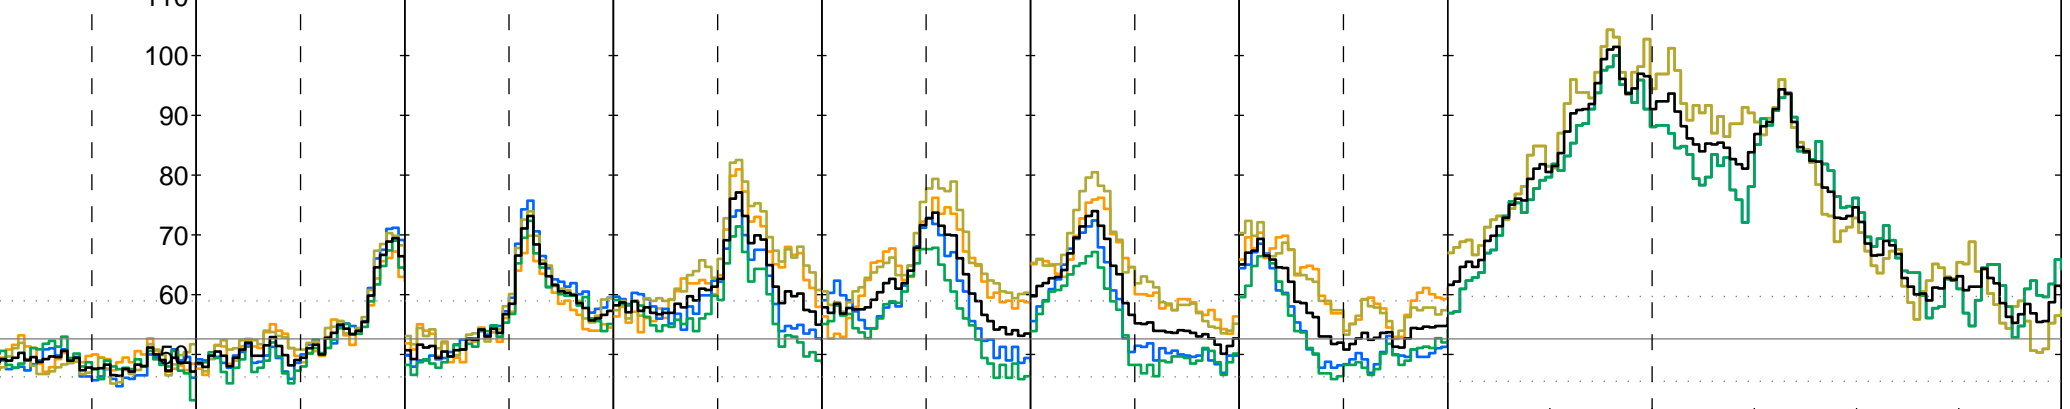



**Cell: C0320070611T11d**

AP: -0.96 ML: 3.7 DV: 5

w: 4 n: 73609  $P_{ISI>2}$ : 0.0591/2pw: 211 $\mu$ s p->v: 509 $\mu$ s $\beta_T$ : -3.7  $\beta_D$ : -6.8 $\beta_P$ : 3.4 SI: -0.36

Session FR: 9.82 Hz

Pk Ev: 8 - Reward (T2/Ipsi)

Pk FR: 45.2Hz (0.08s) ○

## Waveform

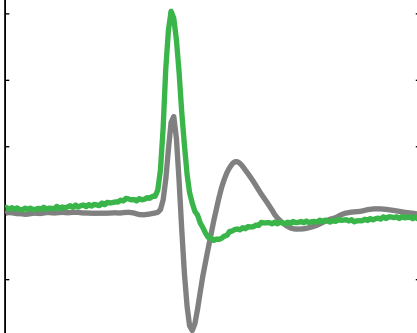

## HP/PV

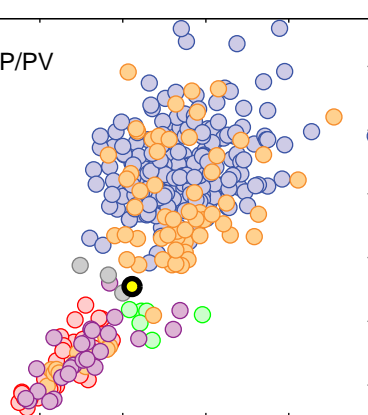

## FR/PV

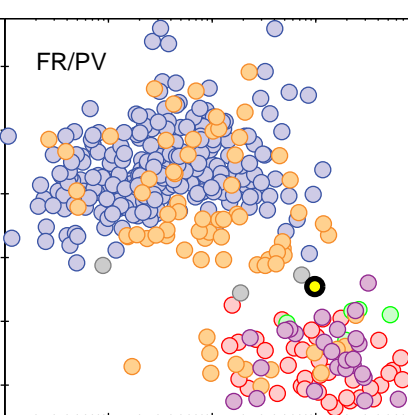

## ISI Histogram [2299]

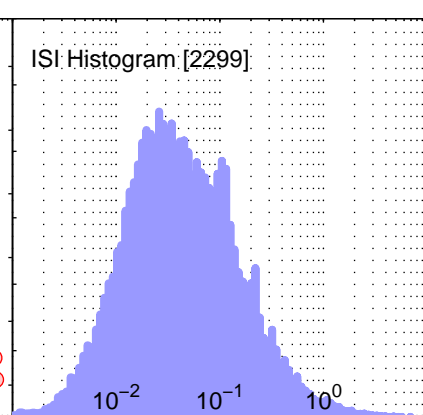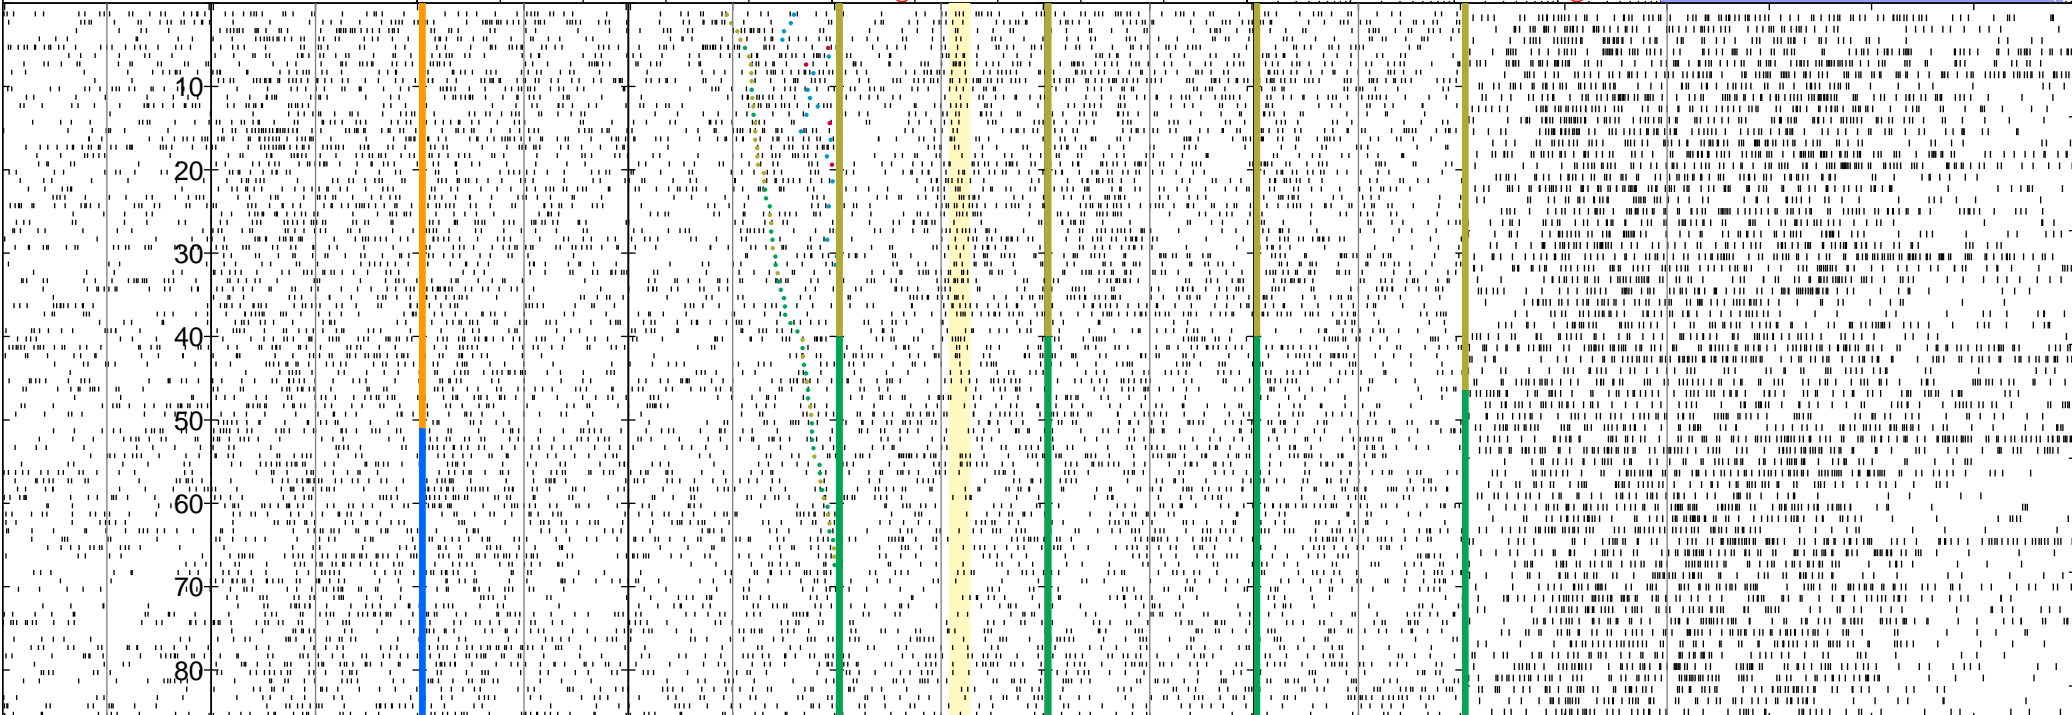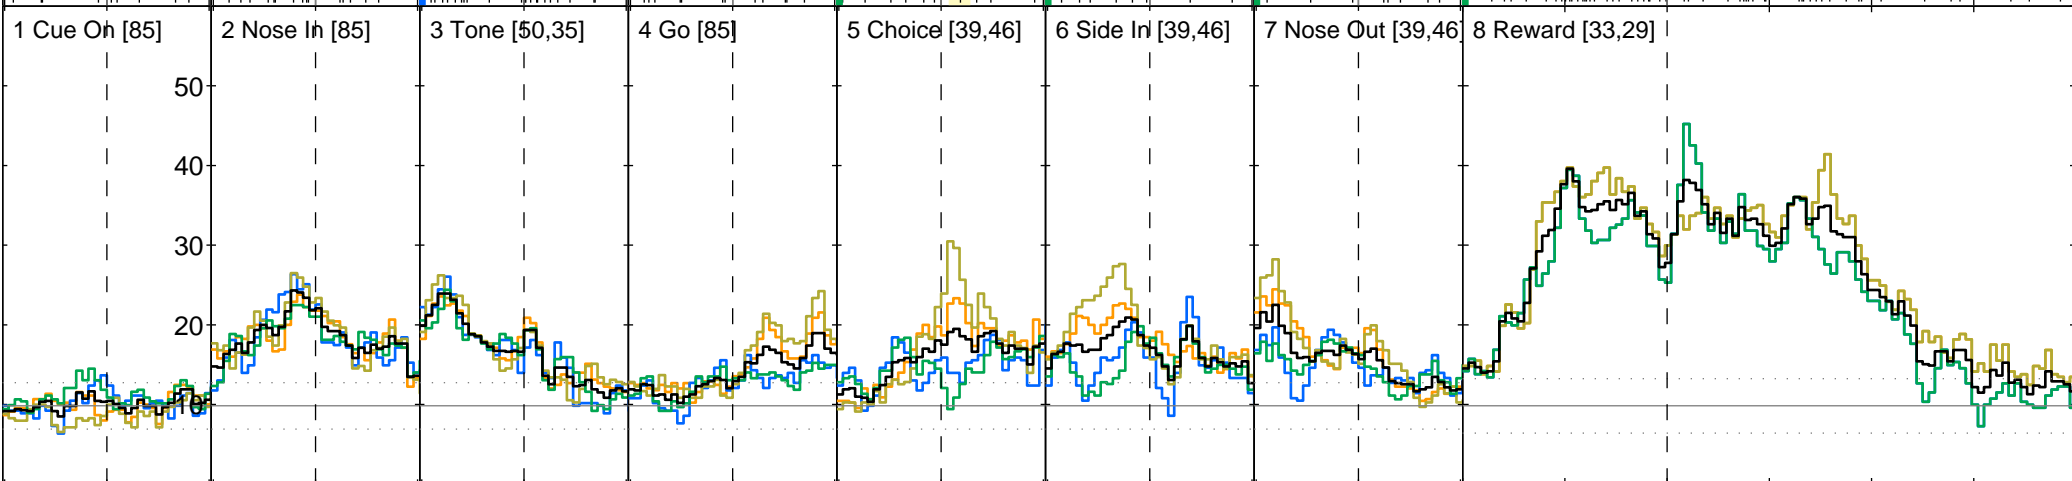

Cell: C0320070622T11e

AP: -0.96 ML: 3.7 DV: 5.8

w: 3 n: 20945  $P_{ISI>2}$ : 0.019

1/2pw: 221 $\mu$ s p->v: 395 $\mu$ s

$\beta_T$ : -2.6  $\beta_D$ : -3.4

$\beta_P$ : 3.2 SI: NaN

Session FR: 5.29 Hz

Pk Ev: 8 - Reward (T2/Ipsi)

Pk FR: 18.8Hz (0.74s) ○

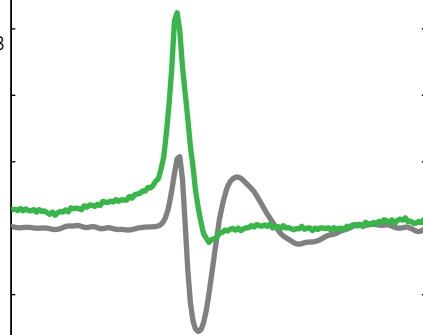

HP/PV

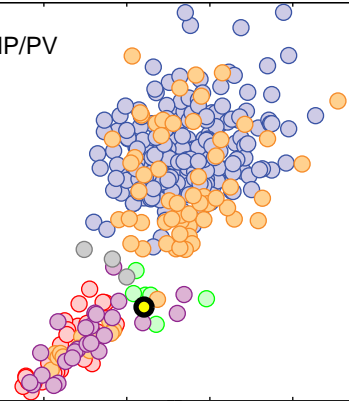

FR/PV

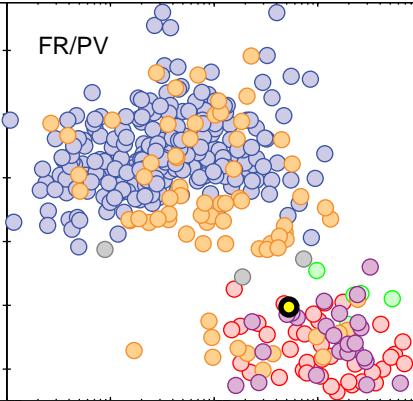

ISI Histogram [596]

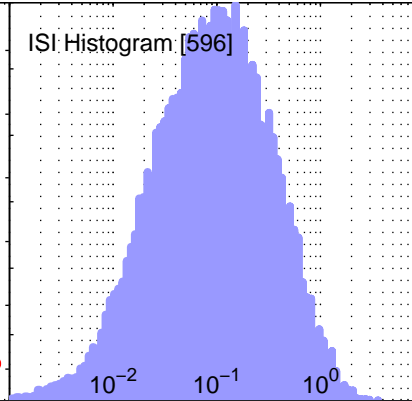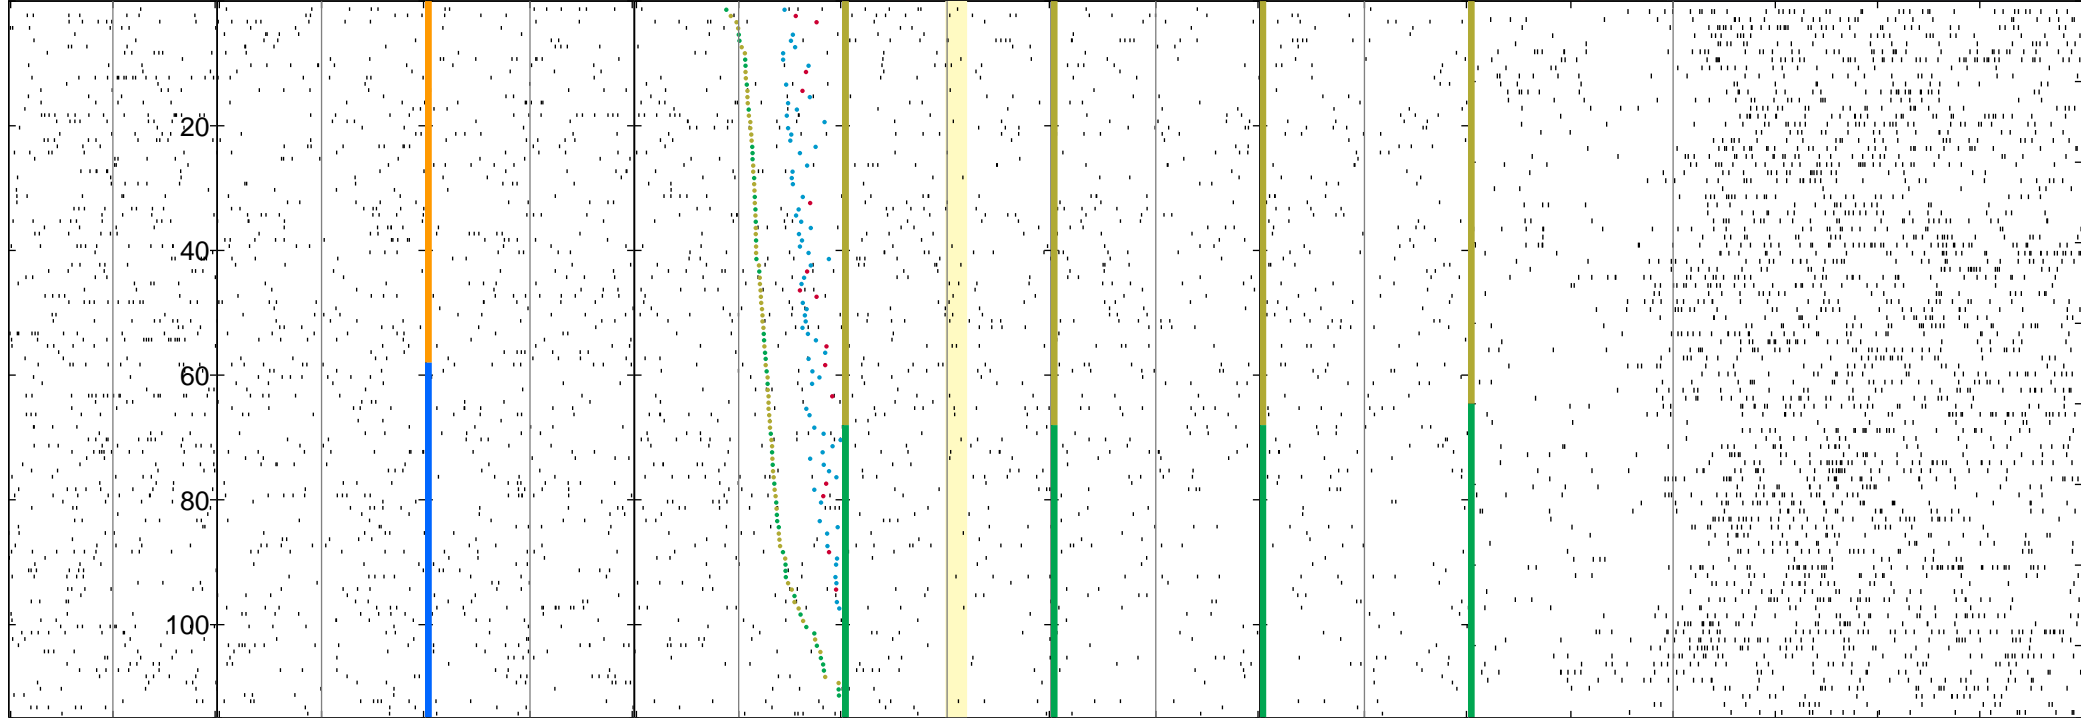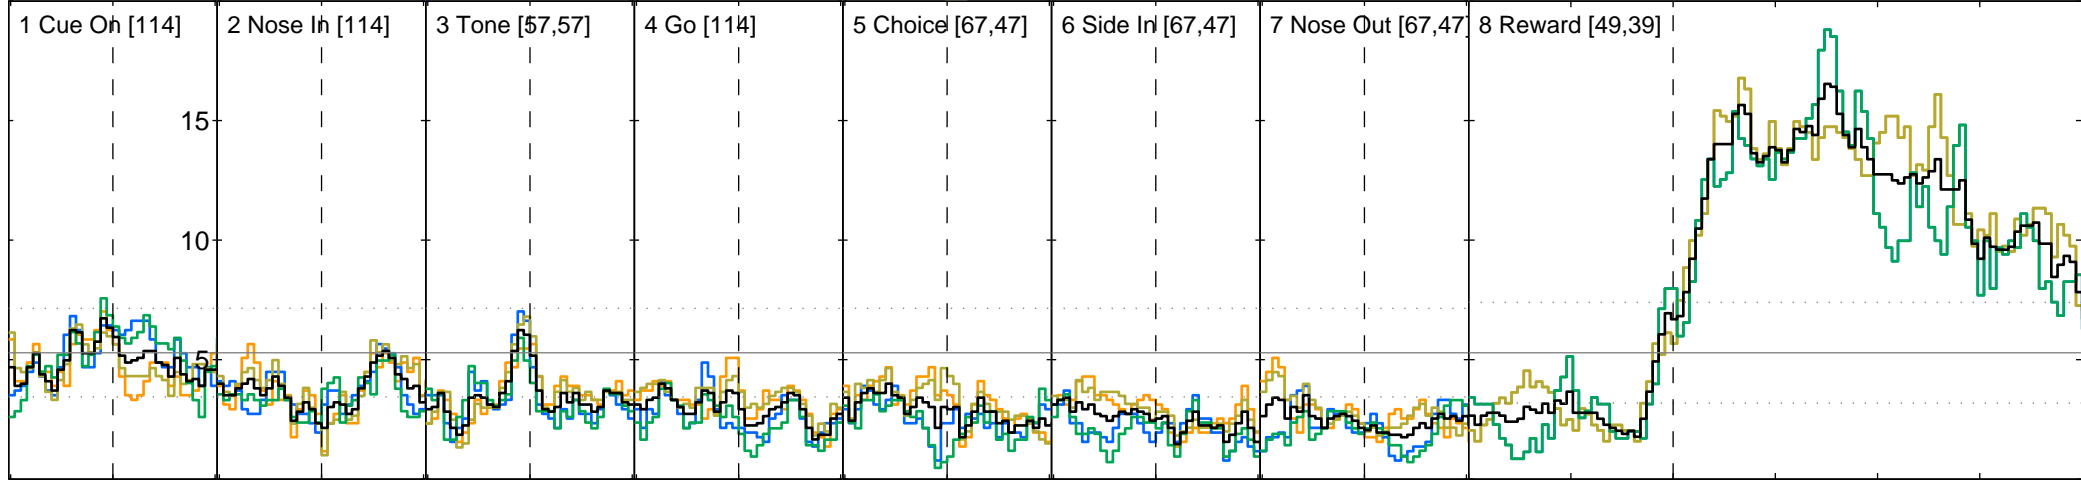

**Cell: C1220071027T03F**

AP: 3.2 ML: 2.6 DV: 2.2  
w: 1 n: 29109  $P_{ISI>2}$ : 0.054  
1/2pw: 269 $\mu$ s p->v: 629 $\mu$ s  
 $\beta_T$ : -2.1  $\beta_D$ : 2.4  
 $\beta_P$ : 3.8 SI: 0.65  
Session FR: 4.85 Hz  
Pk Ev: 1 - Cue on (Contra)  
Pk FR: 11.6Hz (-1.04s) **M1<sub>p</sub>**

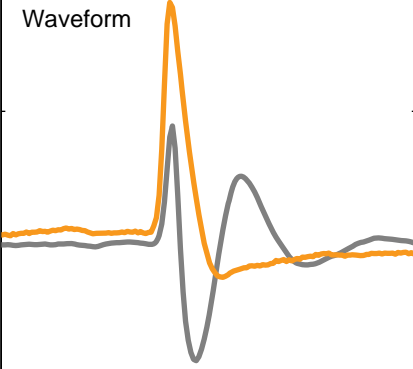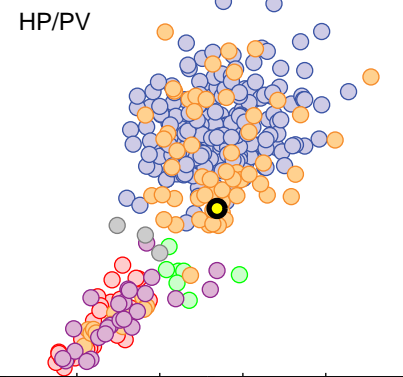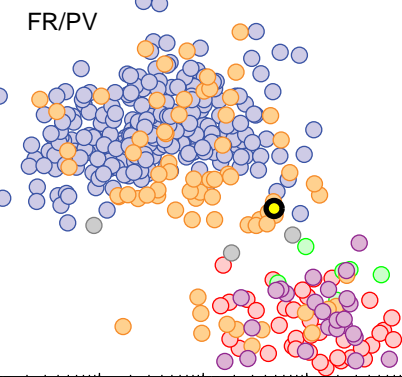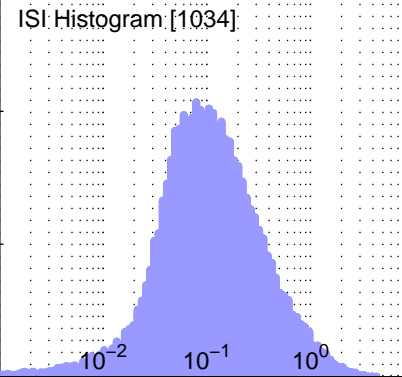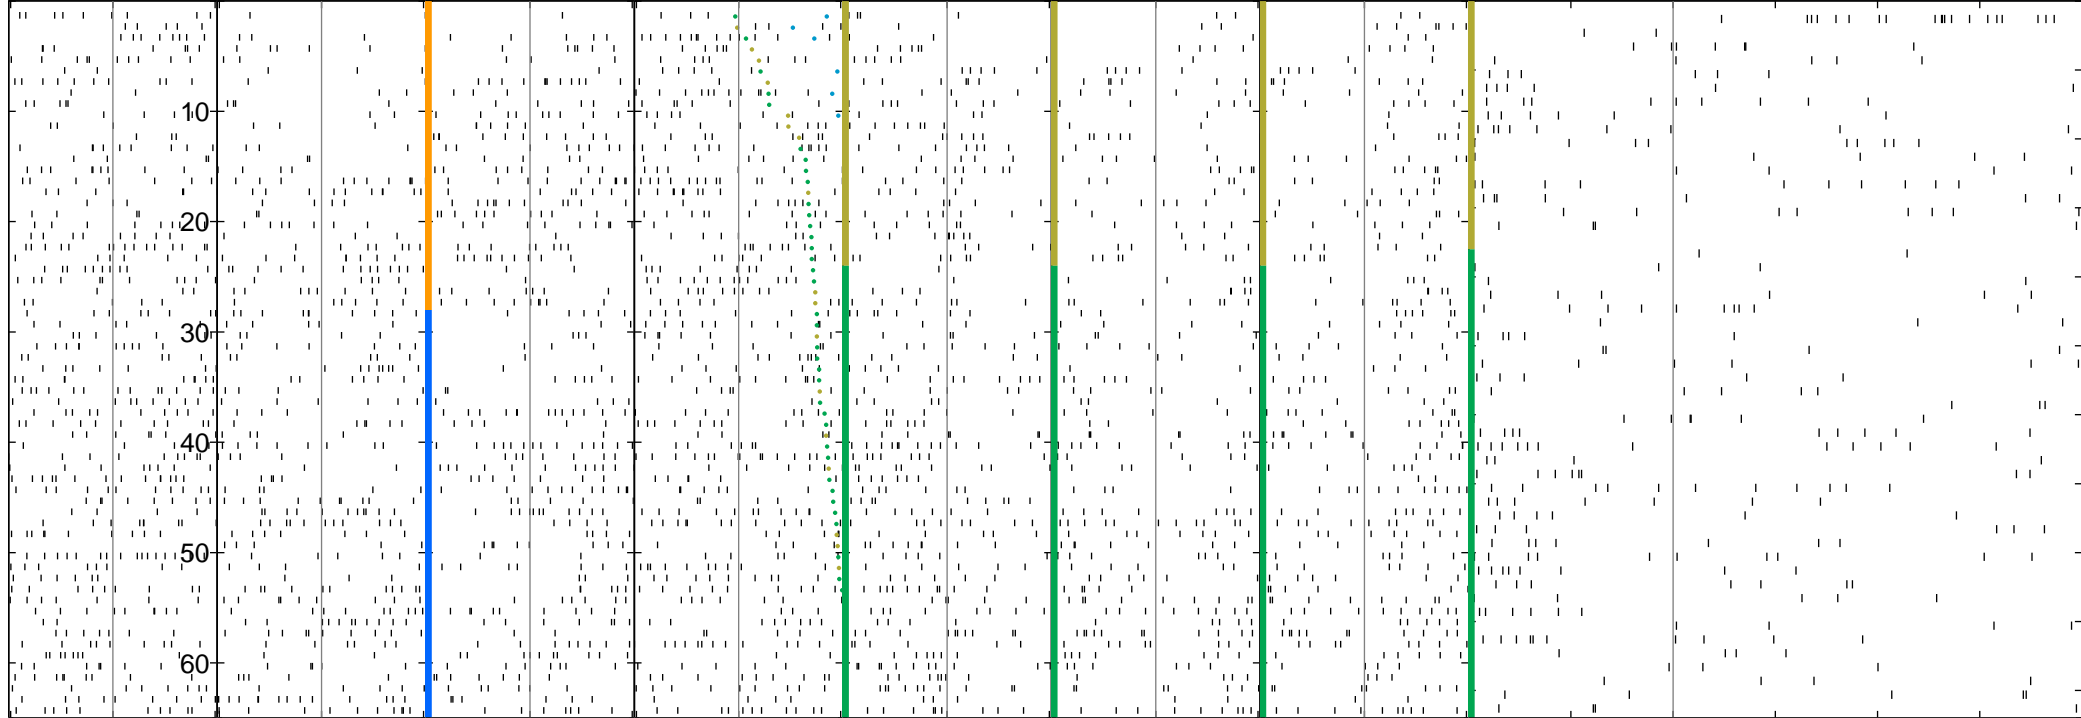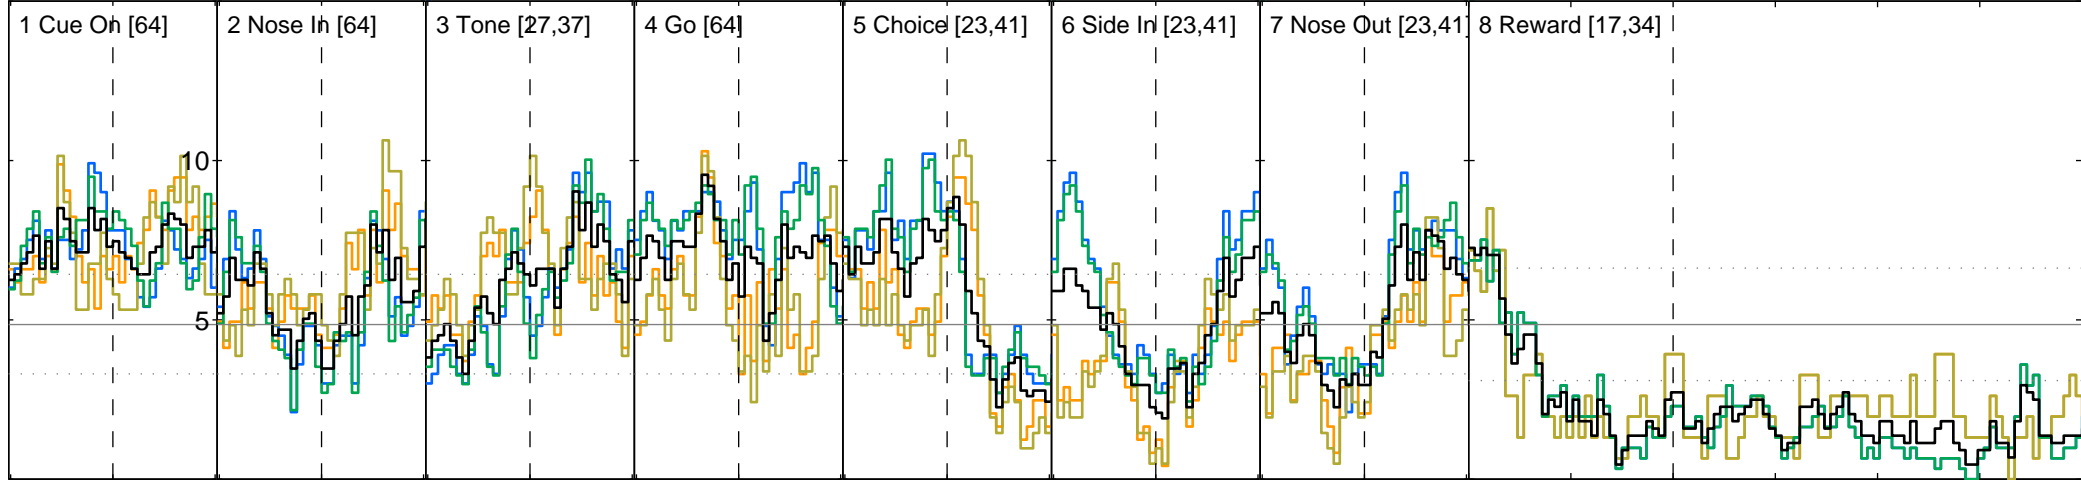

**Cell: C1220071027T03e**

AP: 3.2 ML: 2.6 DV: 2.2  
w: 1 n: 29579  $P_{ISI>2}$ : 0.13  
1/2pw: 275 $\mu$ s p->v: 608 $\mu$ s  
 $\beta_T$ : 2.2  $\beta_D$ : -3.6  
 $\beta_P$ : -2.2 SI: 0.58  
Session FR: 4.93 Hz  
Pk Ev: 1 - Cue on (Tone2)  
Pk FR: 11.1Hz (-0.65s) **M1<sub>p</sub>**

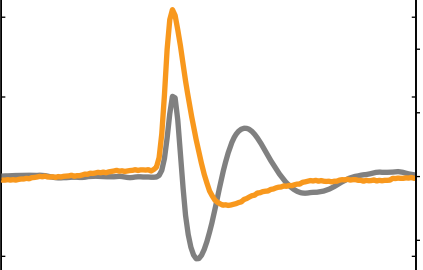

**HP/PV**

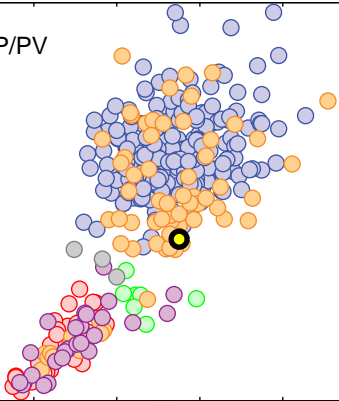

**FR/PV**

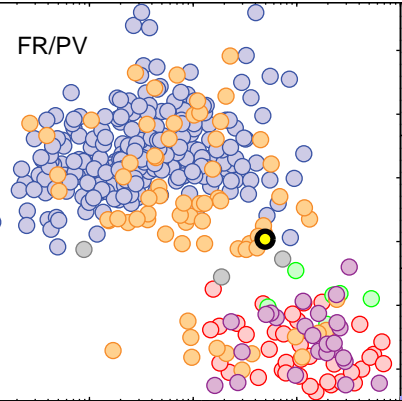

**ISI Histogram [1195]**

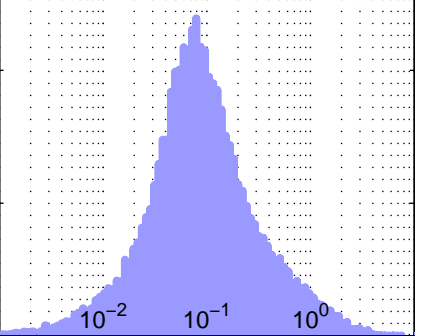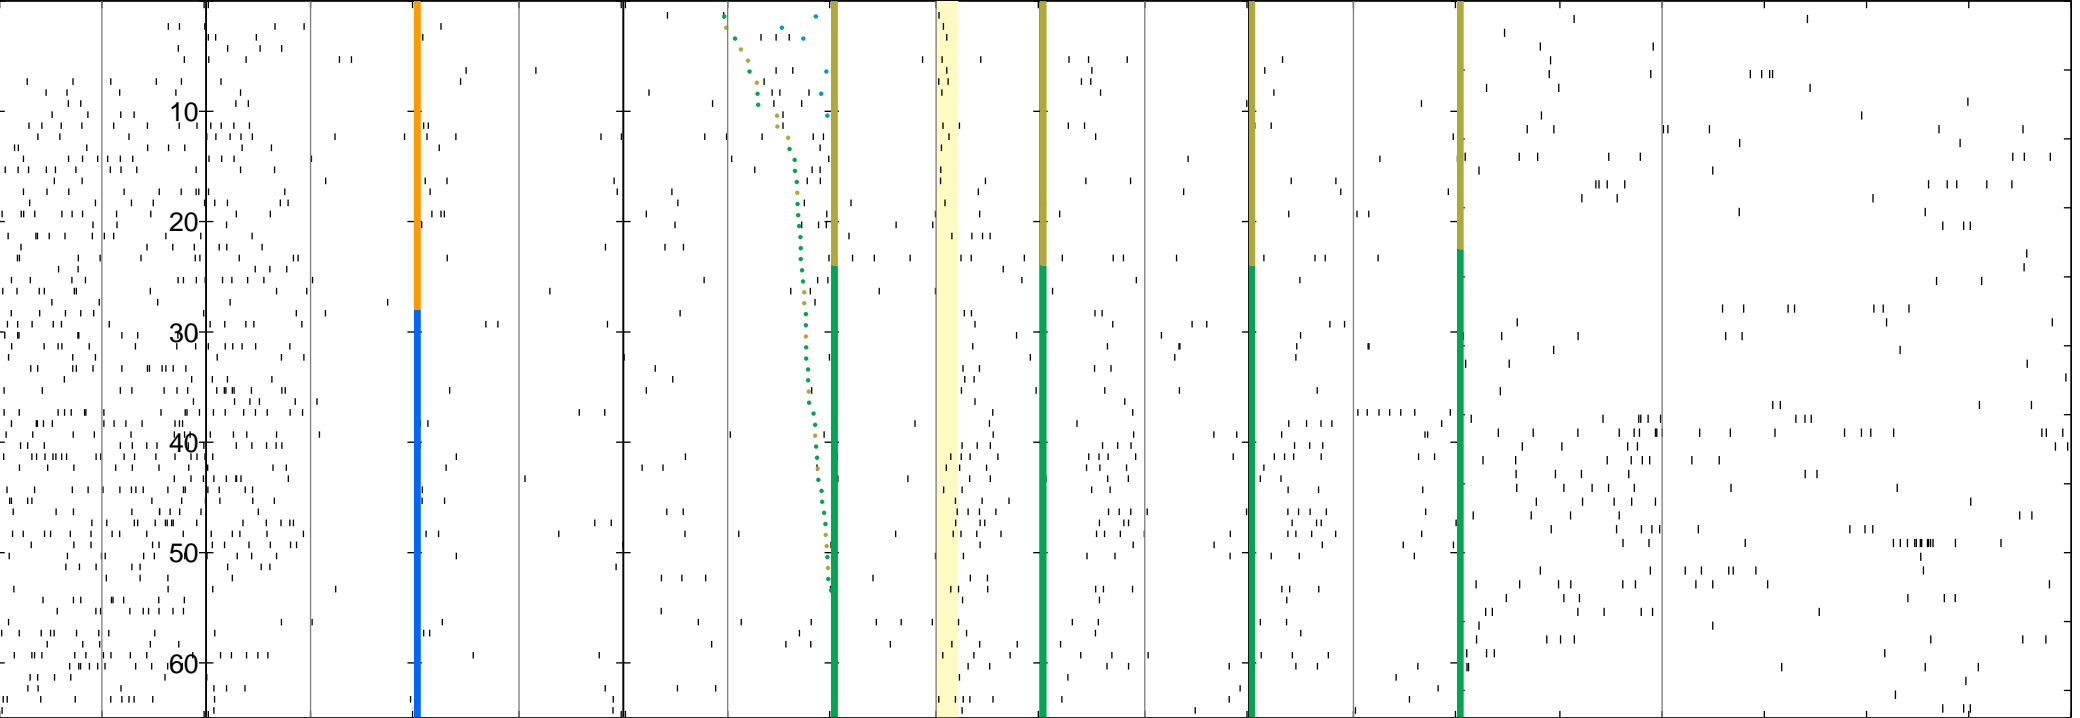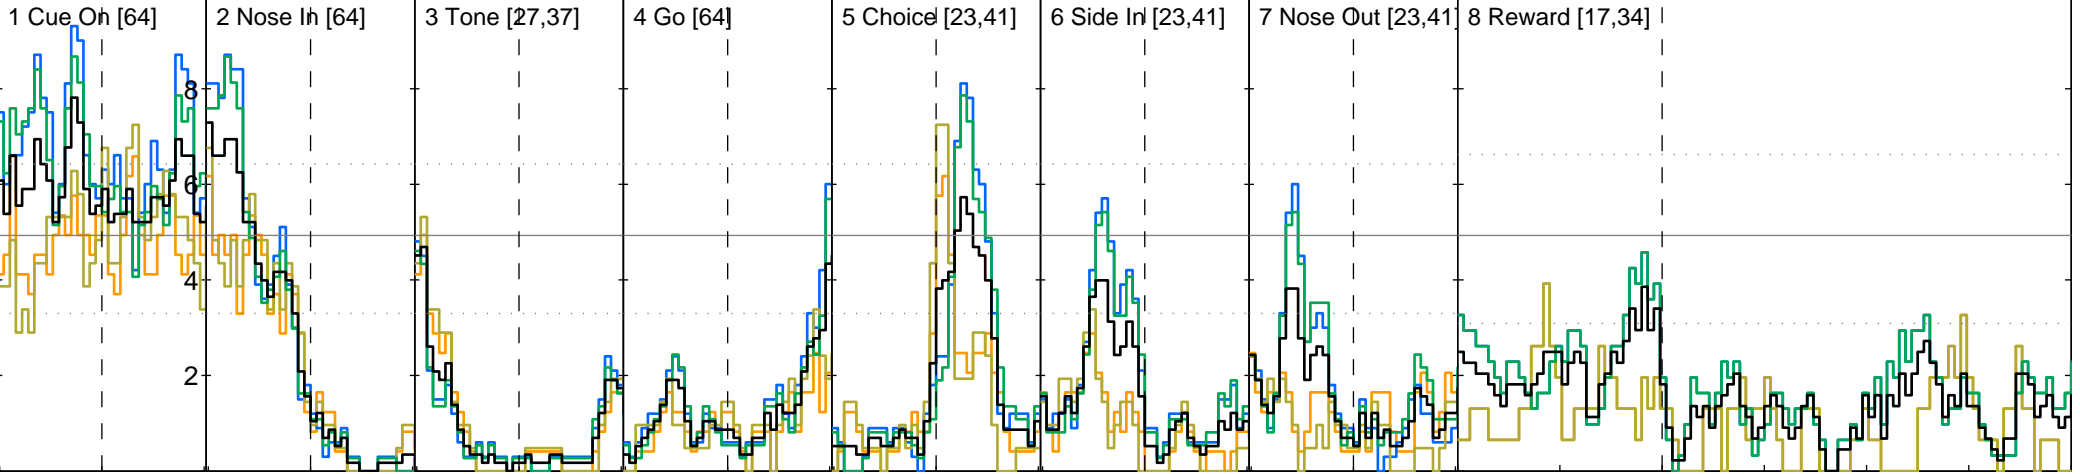

Cell: C1220071027T03i

AP: 3.2 ML: 2.6 DV: 2.2

w: 3 n: 19726  $P_{ISI>2}$ : 0.11

1/2pw: 219 $\mu$ s p->v: 578 $\mu$ s

$\beta_T$ : 3.1  $\beta_D$ : -3.2

$\beta_P$ : 3.1 SI: -0.55

Session FR: 3.29 Hz

Pk Ev: 3 - Tone (Tone1)

Pk FR: 16.9Hz (0.63s) **M1<sub>p</sub>**

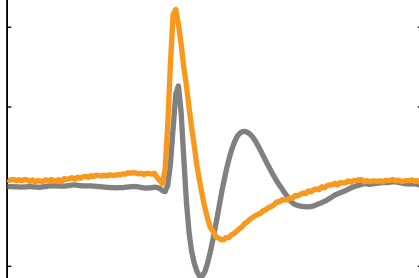

HP/PV

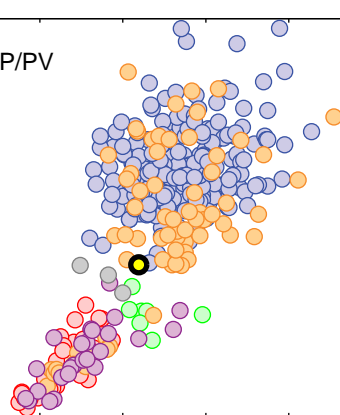

FR/PV

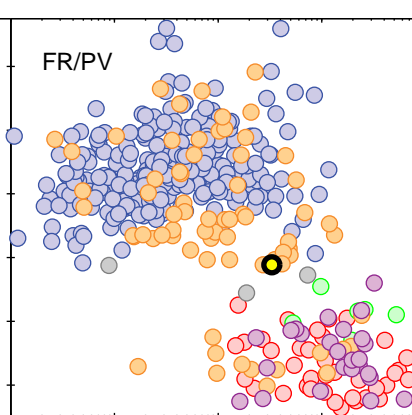

ISI Histogram [580]

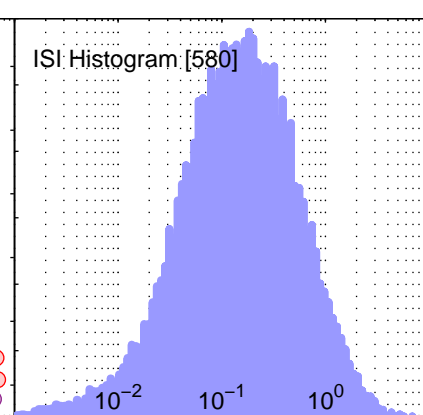

10

20

30

40

50

60

1 Cue On [64]

2 Nose In [64]

3 Tone [27,37]

4 Go [64]

5 Choice [23,41]

6 Side In [23,41]

7 Nose Out [23,41]

8 Reward [17,34]

10

5

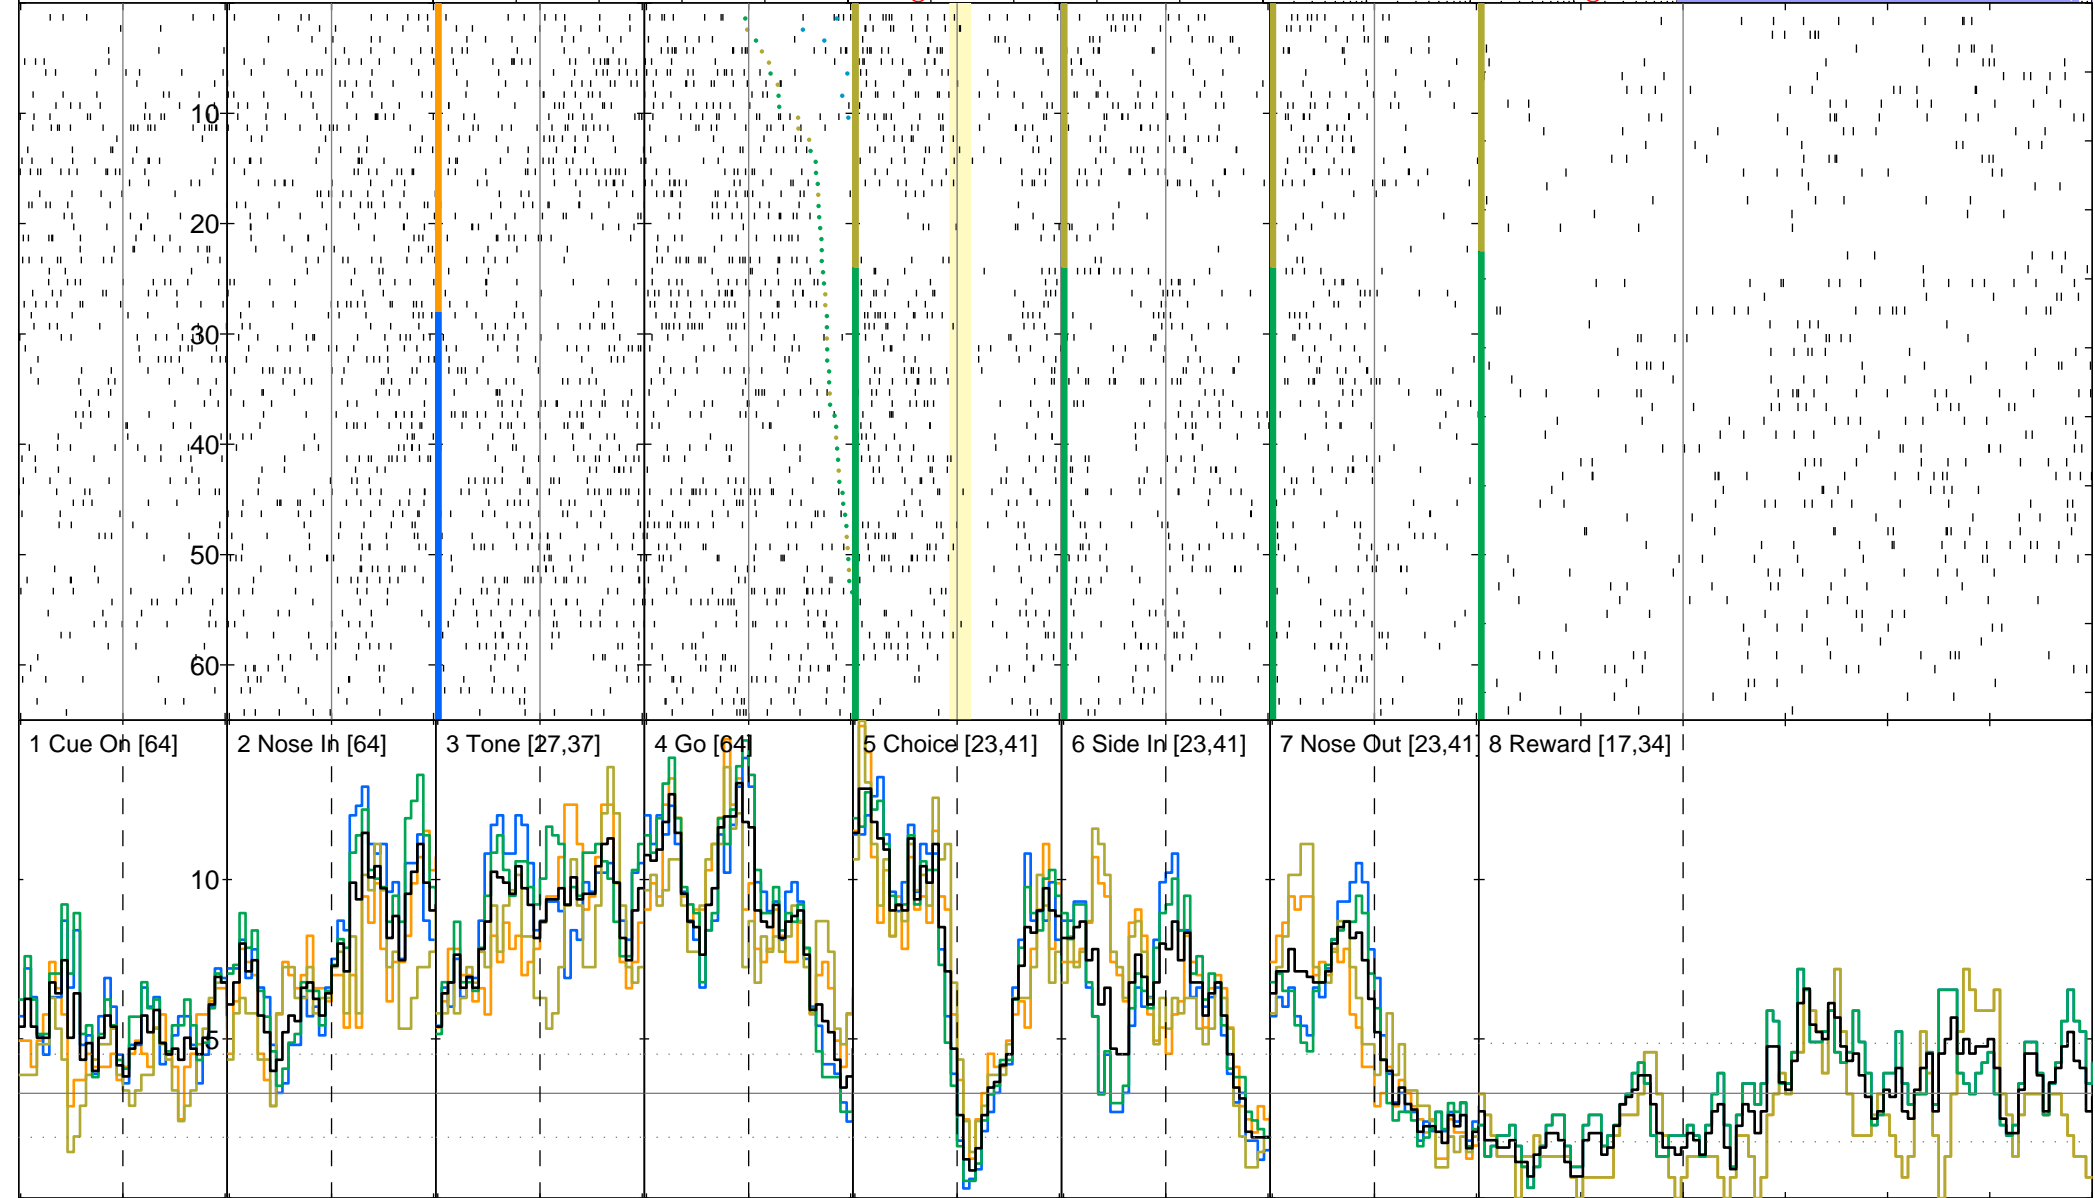



**Cell: C1220071027T03j**

AP: 3.2 ML: 2.6 DV: 2.2

w: 4 n: 16294  $P_{ISI>2}$ : 0.221/2pw: 259 $\mu$ s p $\rightarrow$ v: 578 $\mu$ s $\beta_T$ : 1.4  $\beta_D$ : -5.8 $\beta_P$ : 2.1 SI: -0.63

Session FR: 2.72 Hz

Pk Ev: 5 - Choice (Contra)

Pk FR: 15.9Hz (0.06s) **M1<sub>p</sub>**

## Waveform

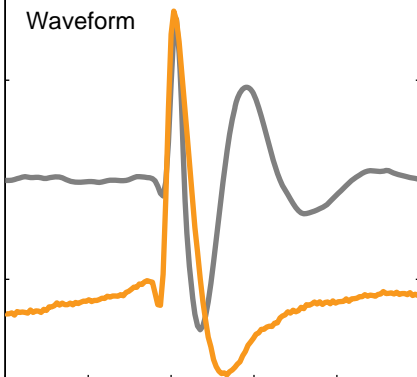

## HP/PV

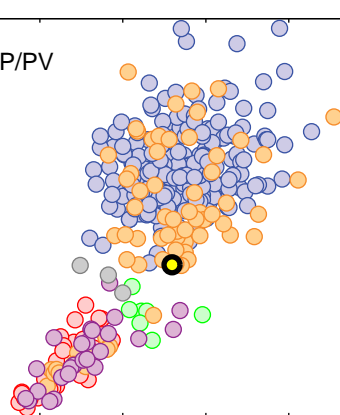

## FR/PV

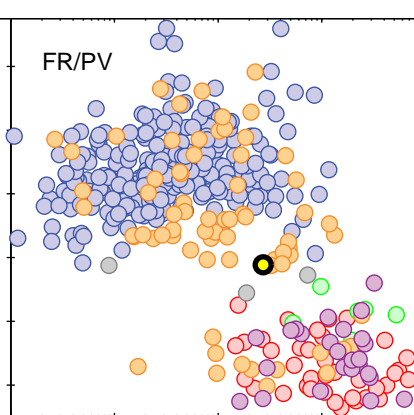

## ISI Histogram [401]

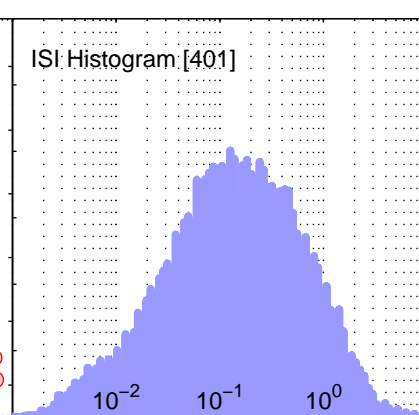

10

20

30

40

50

60

1 Cue On [64]

2 Nose In [64]

3 Tone [27,37]

4 Go [64]

5 Choice [23,41]

6 Side In [23,41]

7 Nose Out [23,41]

8 Reward [17,34]

15

10

5

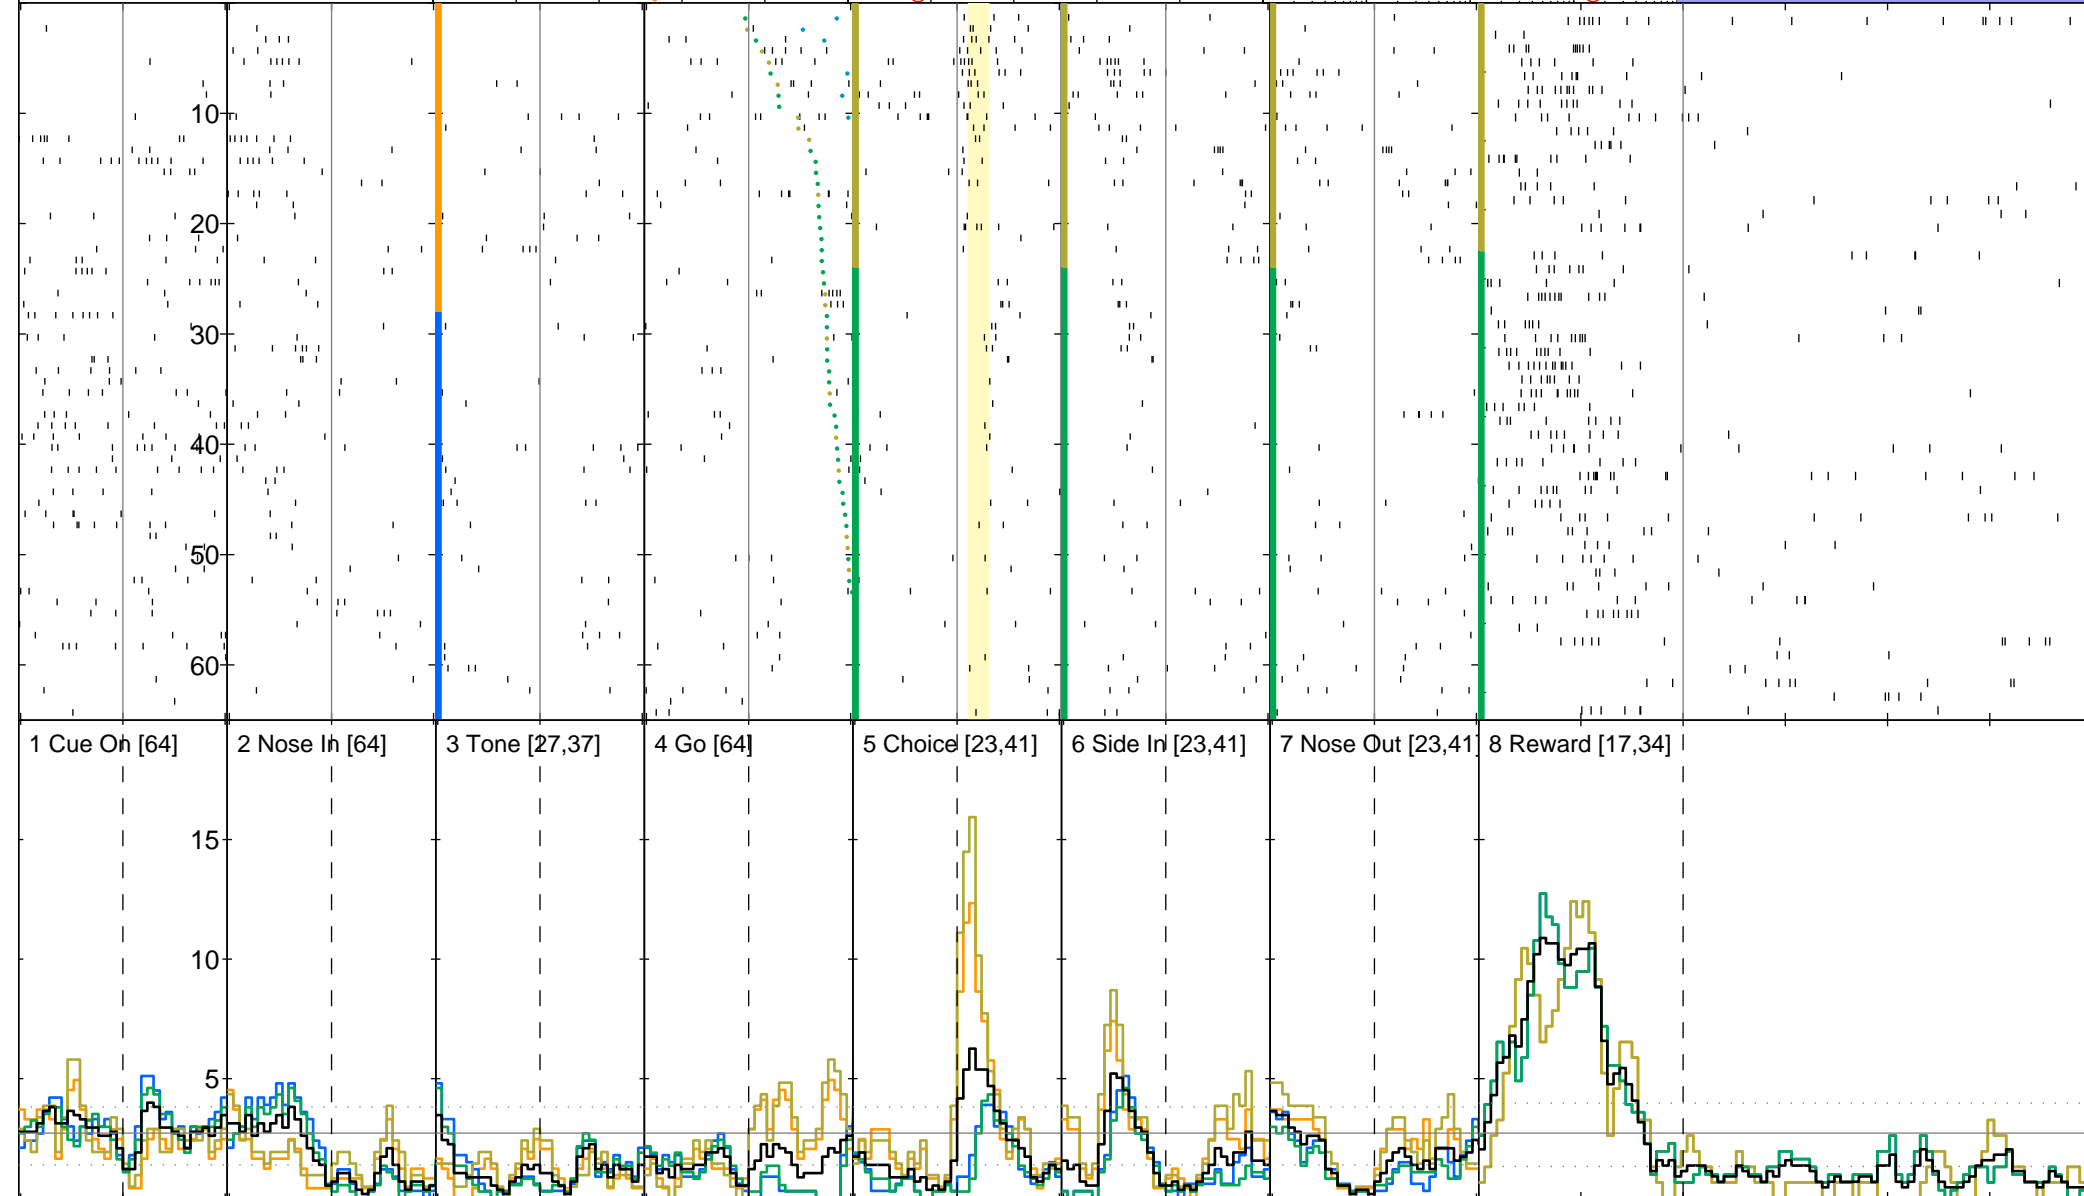

Cell: C1220071028T03b

AP: 3.2 ML: 2.6 DV: 2.3

w: 1 n: 21080  $P_{ISI>2}$ : 0.37

1/2pw: 248 $\mu$ s p $\rightarrow$ v: 594 $\mu$ s

$\beta_T$ : -2.1  $\beta_D$ : -17

$\beta_P$ : -2.8 SI: -0.98

Session FR: 3.51 Hz

Pk Ev: 5 - Choice (Contra)

Pk FR: 48.1Hz (0.06s) M1<sub>P</sub>

Waveform

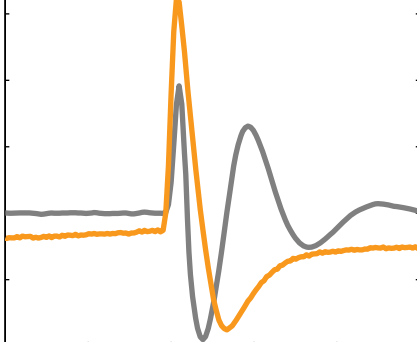

HP/PV

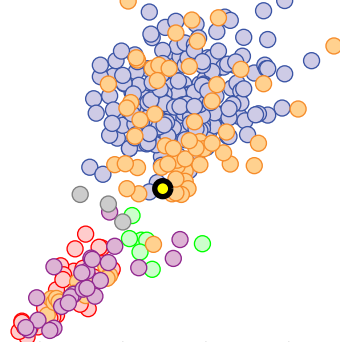

FR/PV

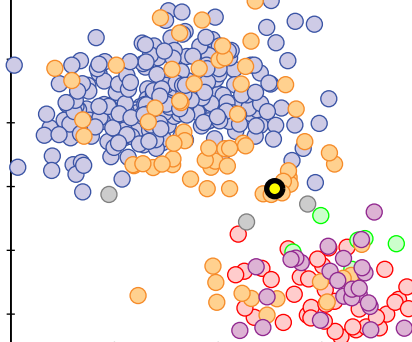

ISI Histogram [713]

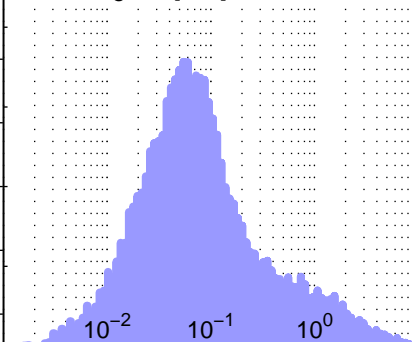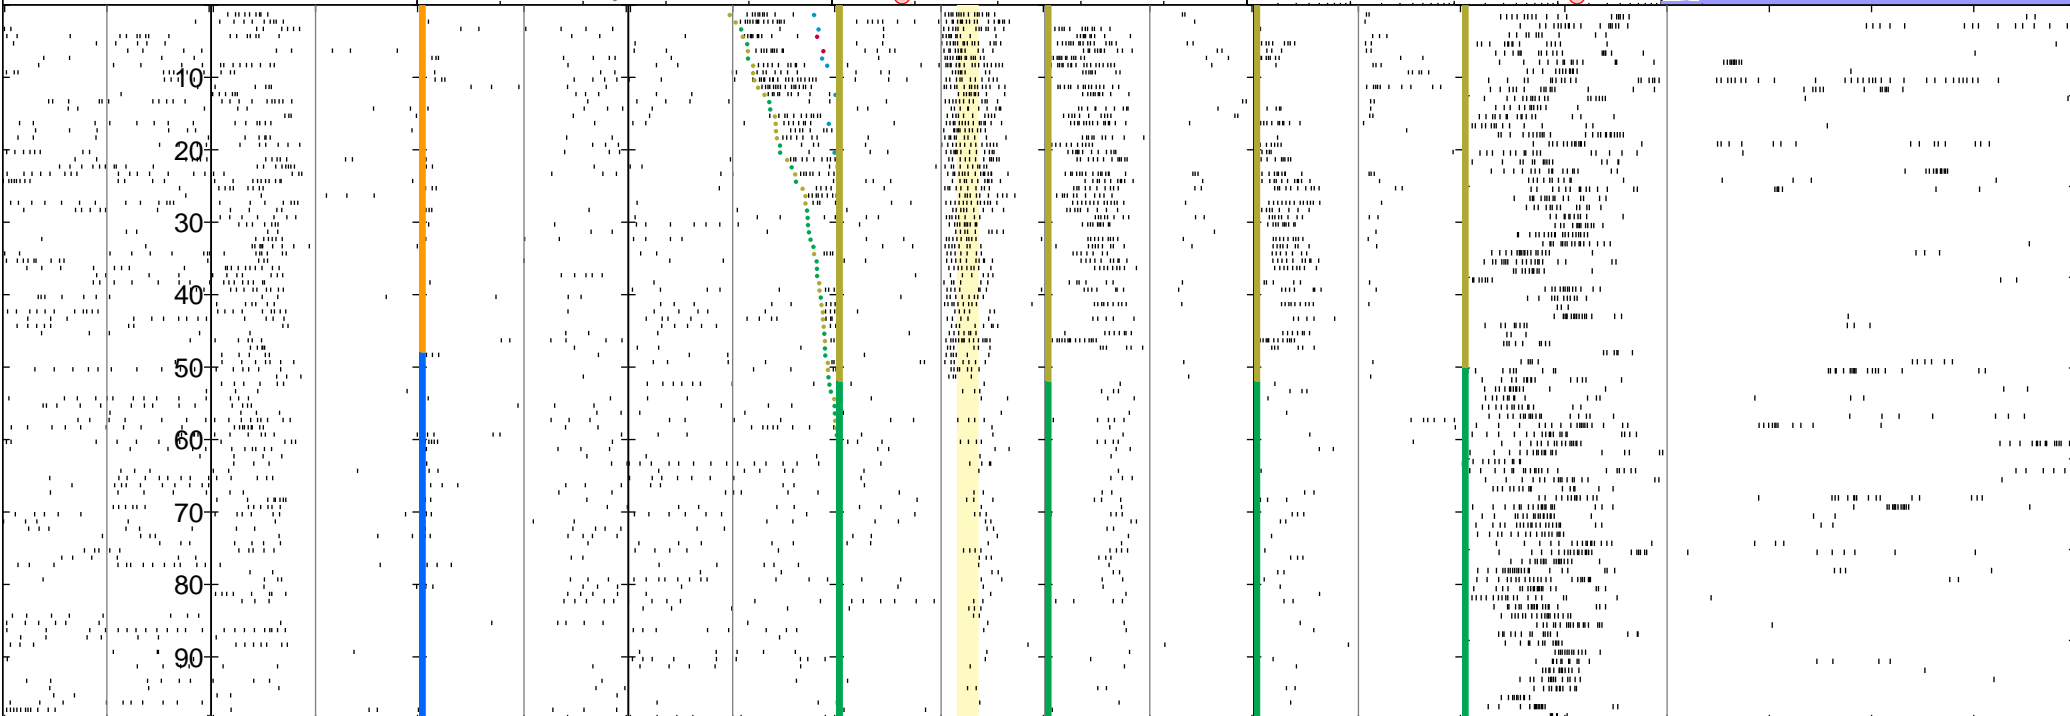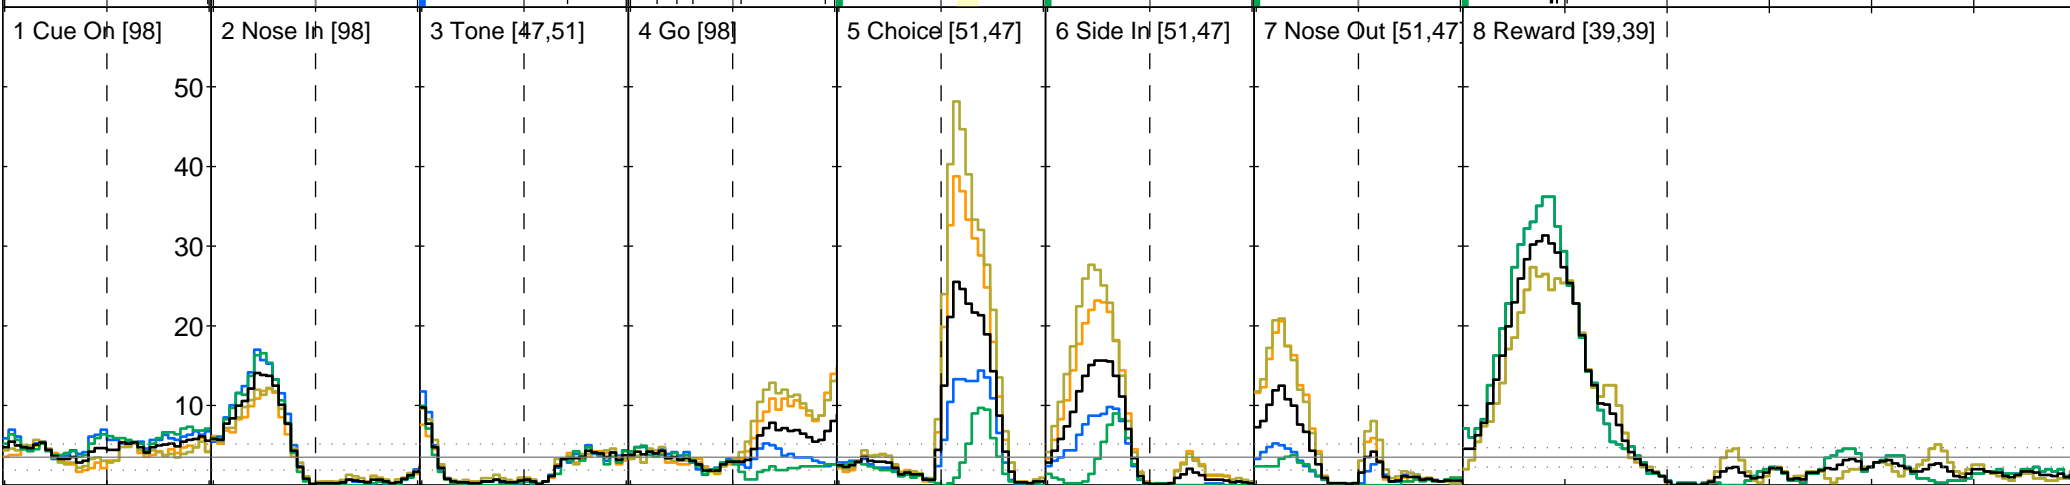



Cell: C1220071028T03c

AP: 3.2 ML: 2.6 DV: 2.3

w: 4 n: 5142  $P_{ISI>2}$ : 0.74

1/2pw: 246 $\mu$ s p->v: 661 $\mu$ s

$\beta_T$ : 1.9  $\beta_D$ : 9.8

$\beta_P$ : -2.7 SI: 0.93

Session FR: 0.858 Hz

Pk Ev: 5 - Choice (Ipsi)

Pk FR: 29.1Hz (0.09s) **M1<sub>p</sub>**

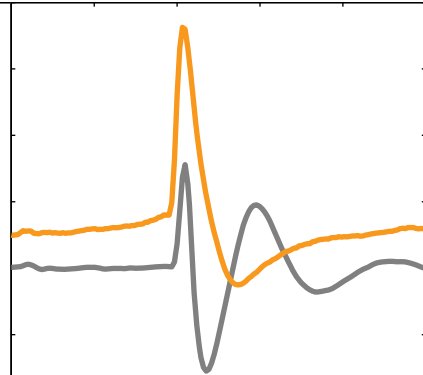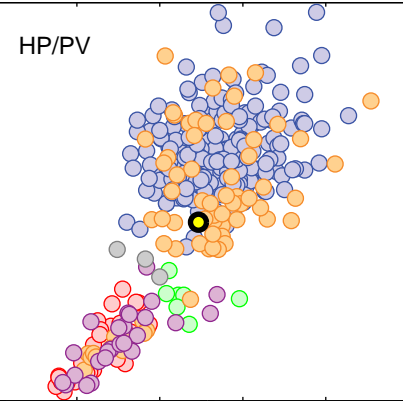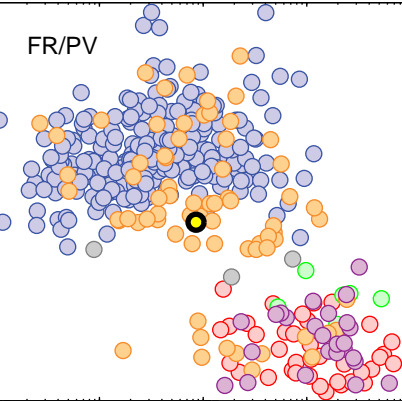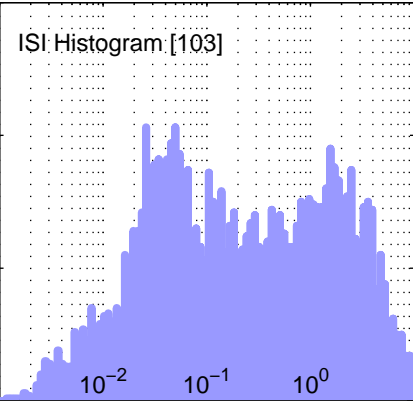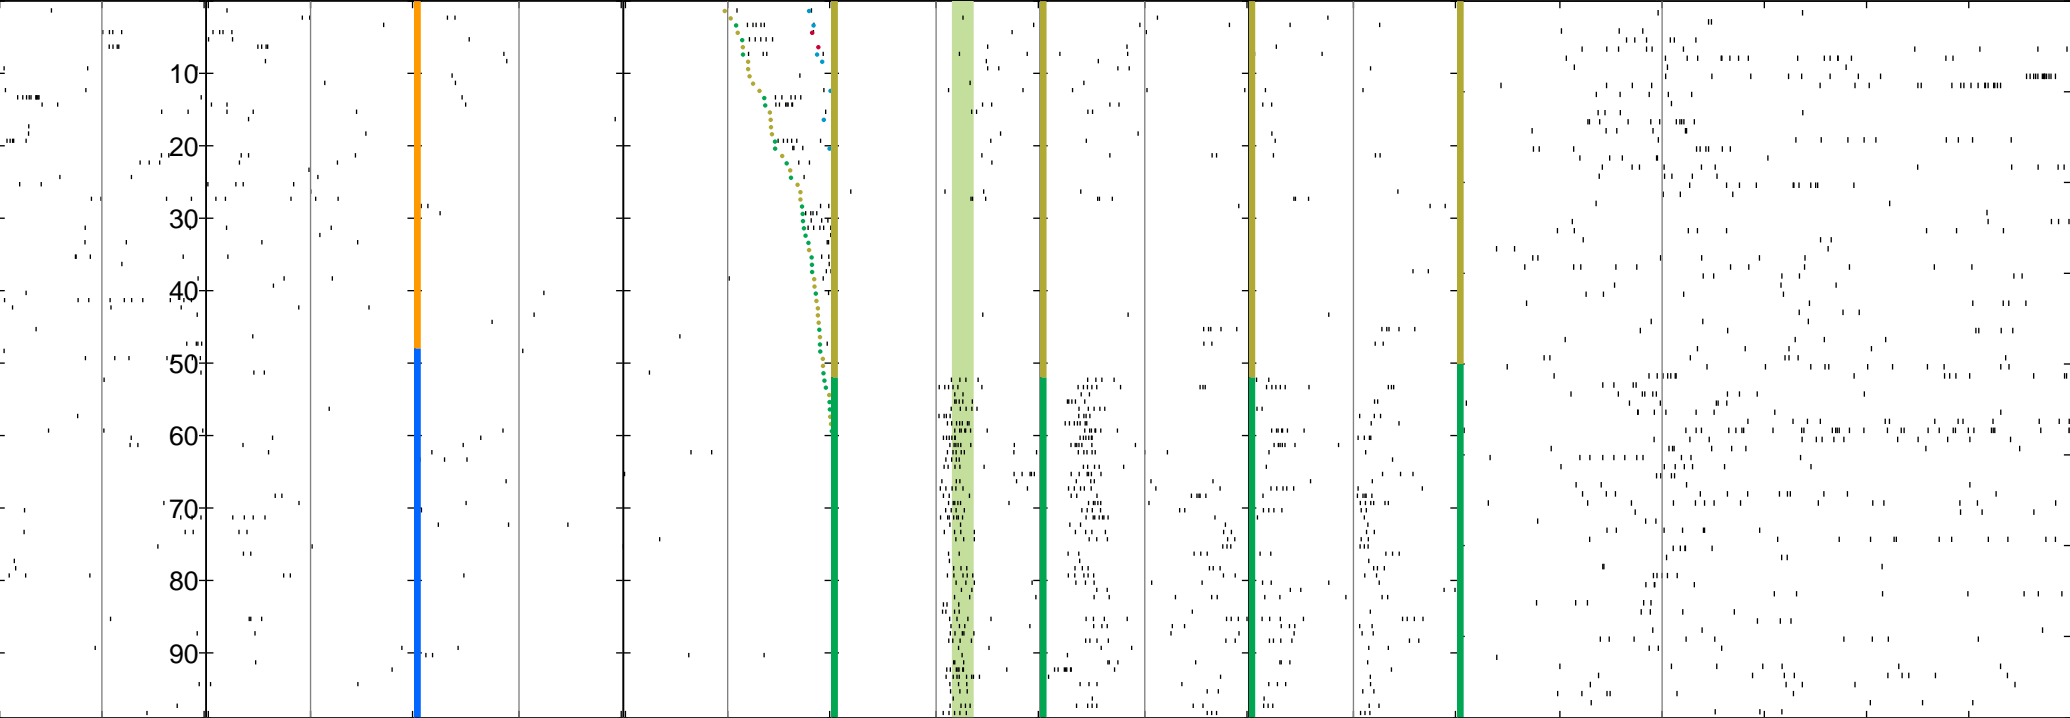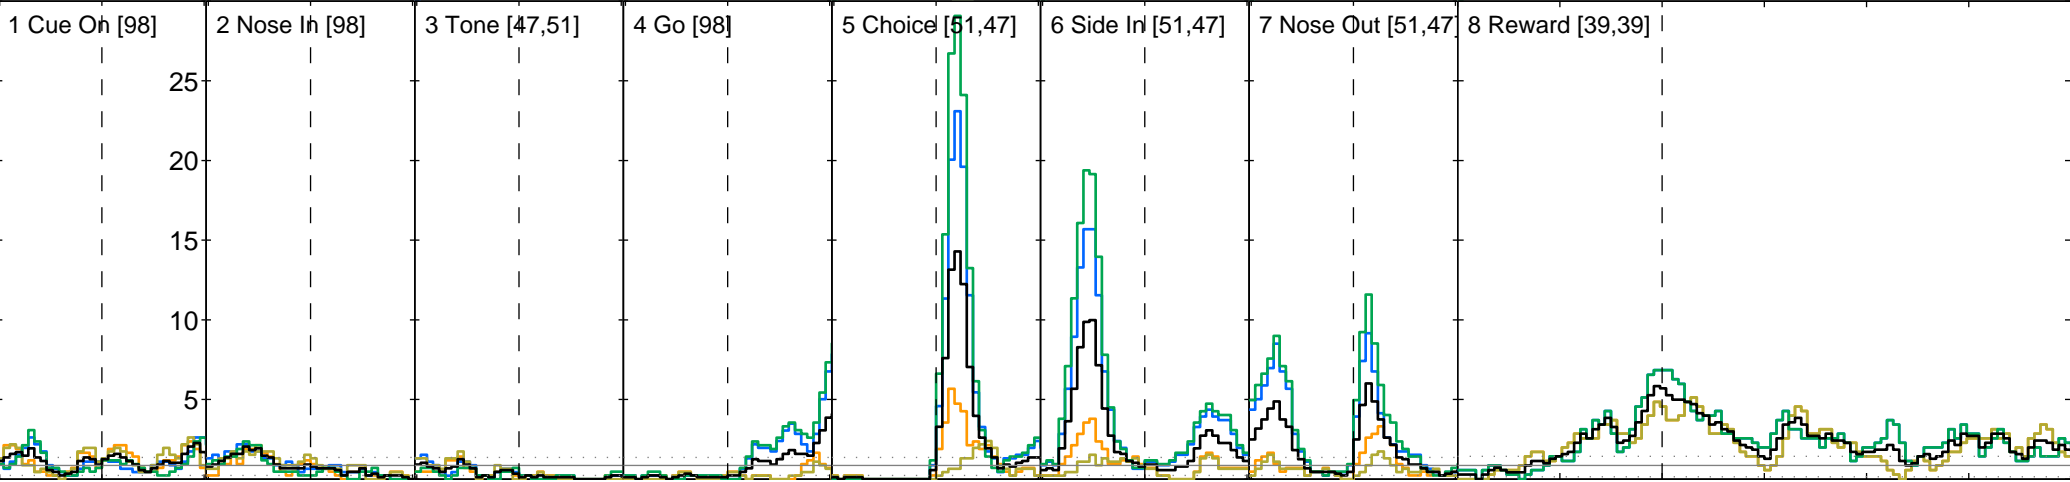

Cell: C1220071114T03d

AP: 3.2 ML: 2.6 DV: 2.4

w: 2 n: 25991  $P_{ISI>2}$ : 0.2

1/2pw: 275 $\mu$ s p $\rightarrow$ v: 616 $\mu$ s

$\beta_T$ : 4.5  $\beta_D$ : -4.7

$\beta_P$ : -4.1 SI: -0.36

Session FR: 4.27 Hz

Pk Ev: 5 - Choice (Contra)

Pk FR: 42.6Hz (0.12s) **M1<sub>p</sub>**

Waveform

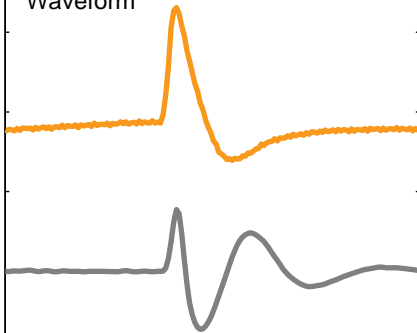

HP/PV

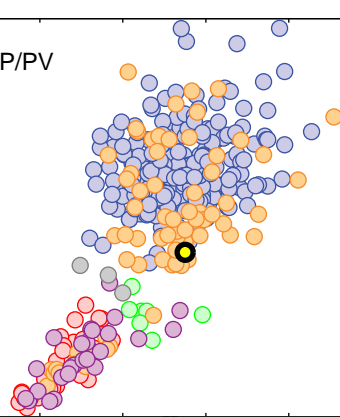

FR/PV

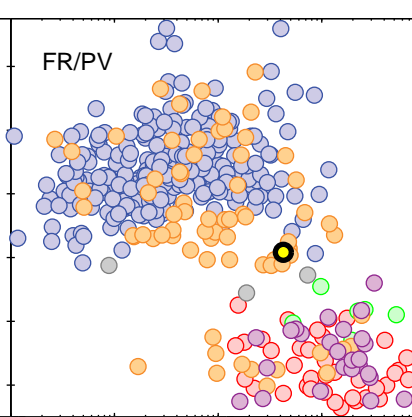

ISI Histogram [813]

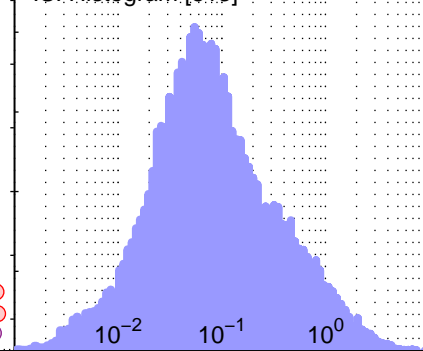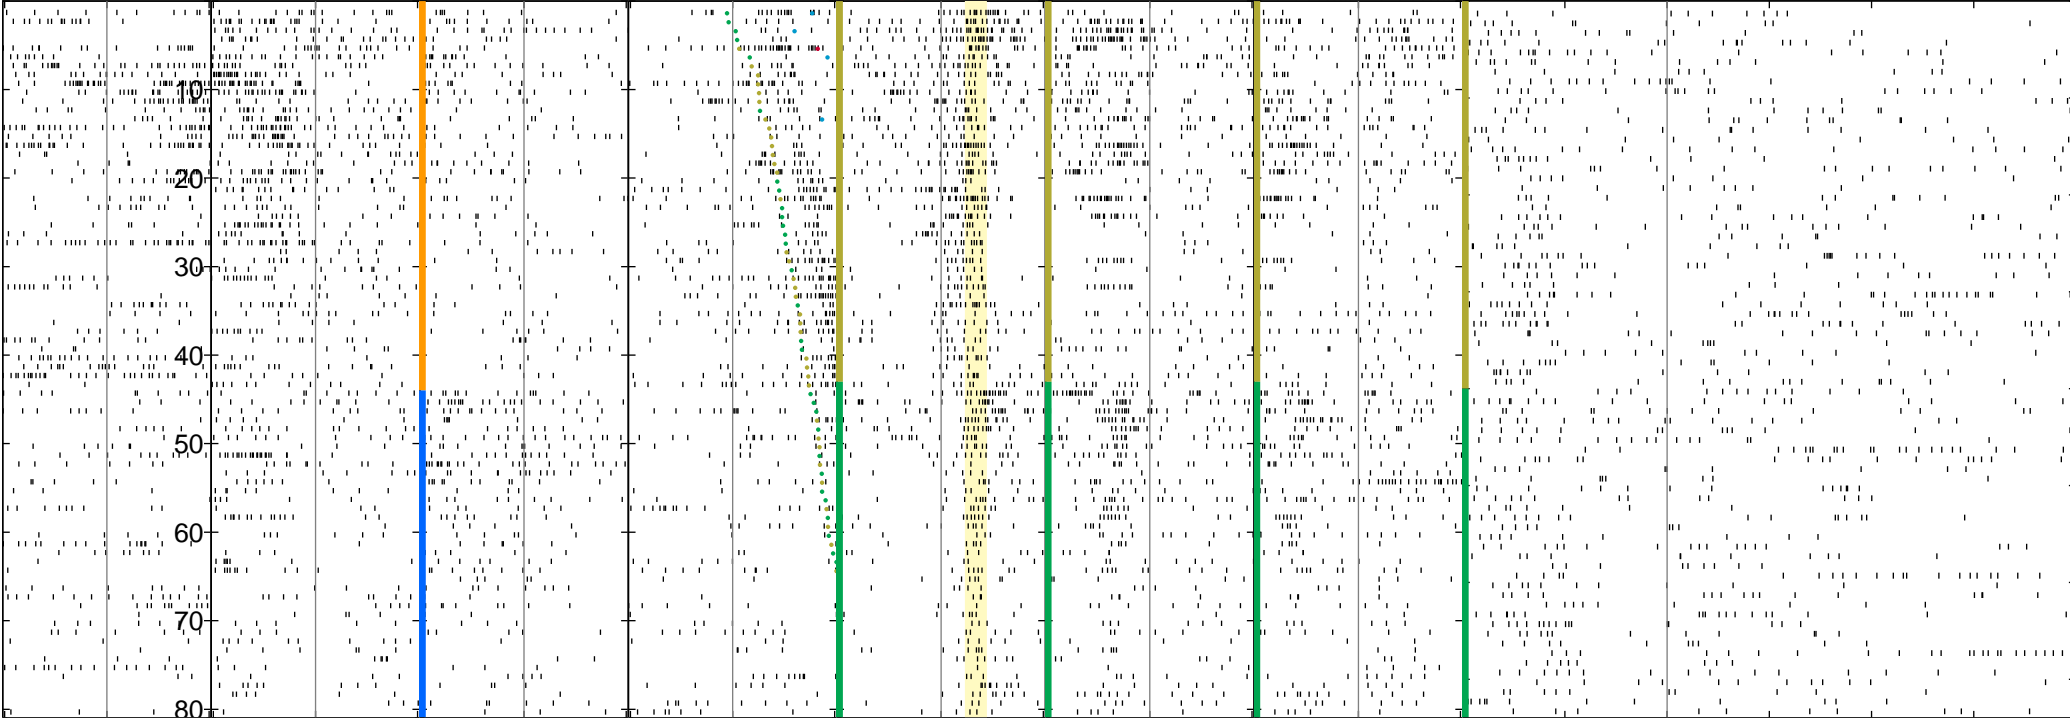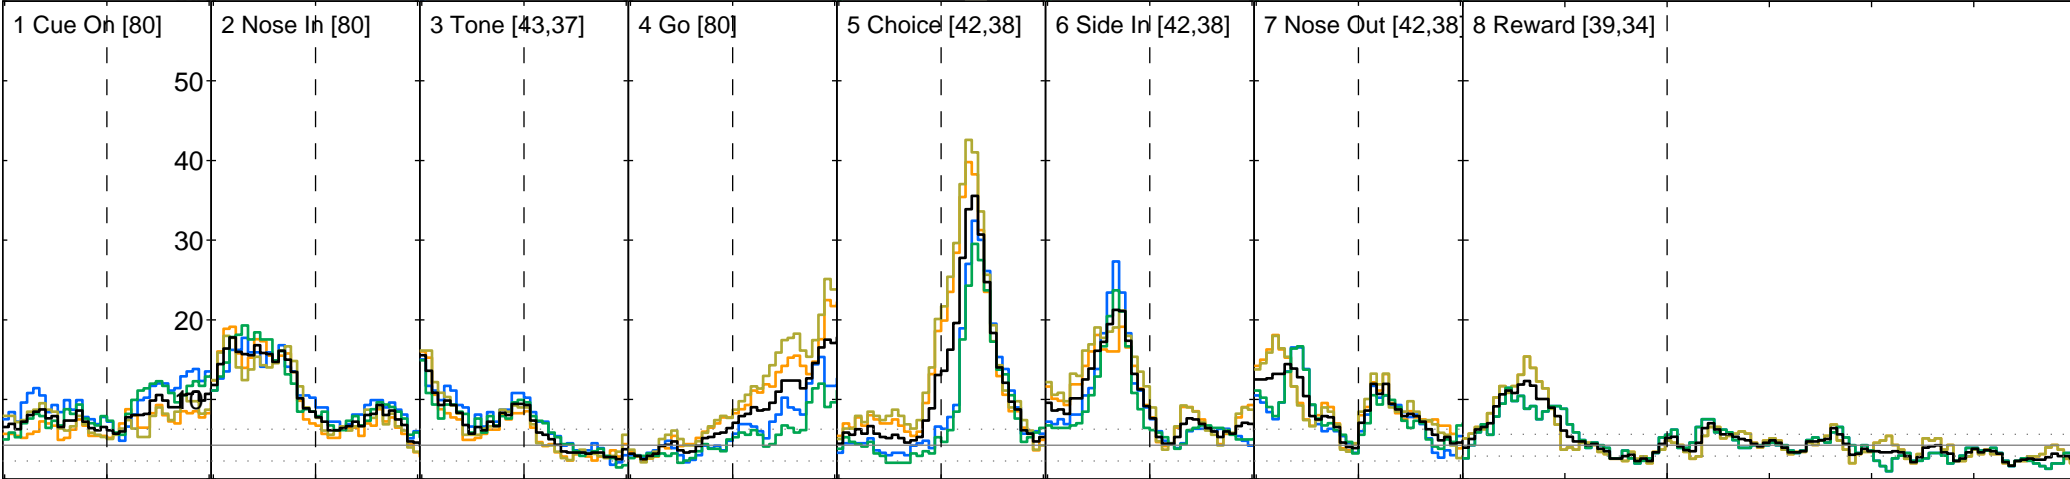

Cell: C1220071025T03d

AP: 3.2 ML: 2.6 DV: 2

w: 4 n: 89284  $P_{ISI>2}$ : 0.0003

1/2pw: 330 $\mu$ s p->v: 670 $\mu$ s

$\beta_T$ : -2.4  $\beta_D$ : 3

$\beta_P$ : -3.1 SI: -0.21

Session FR: 13.2 Hz

Pk Ev: 5 - Choice (Ipsi)

Pk FR: 43.9Hz (0.33s) M1<sub>p</sub>

Waveform

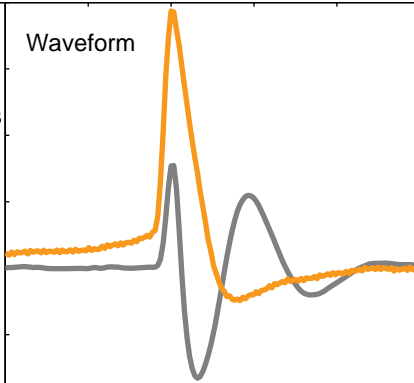

HP/PV

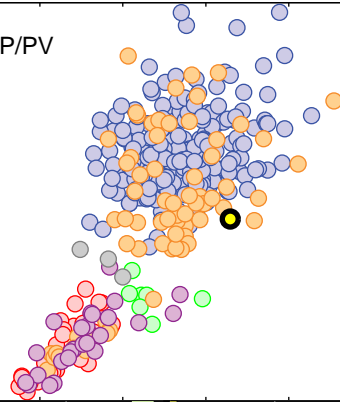

FR/PV

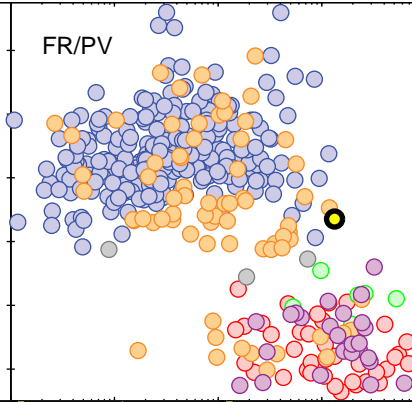

ISI Histogram [3591]

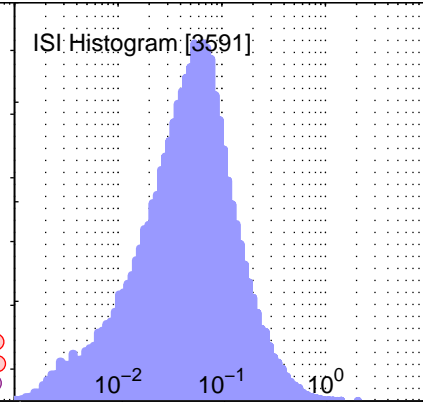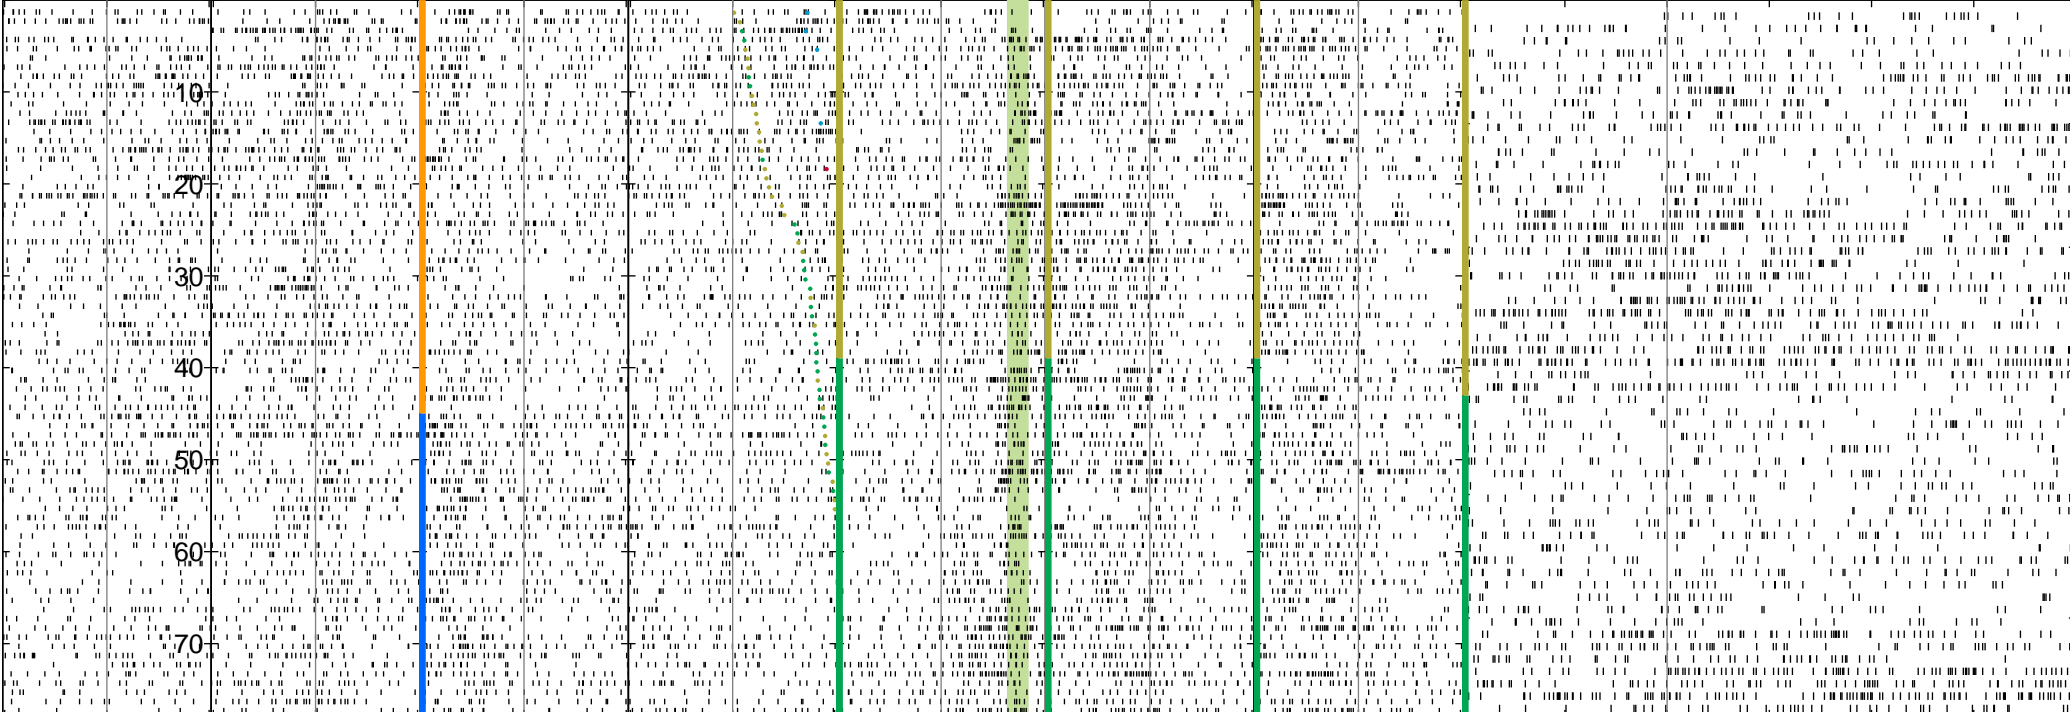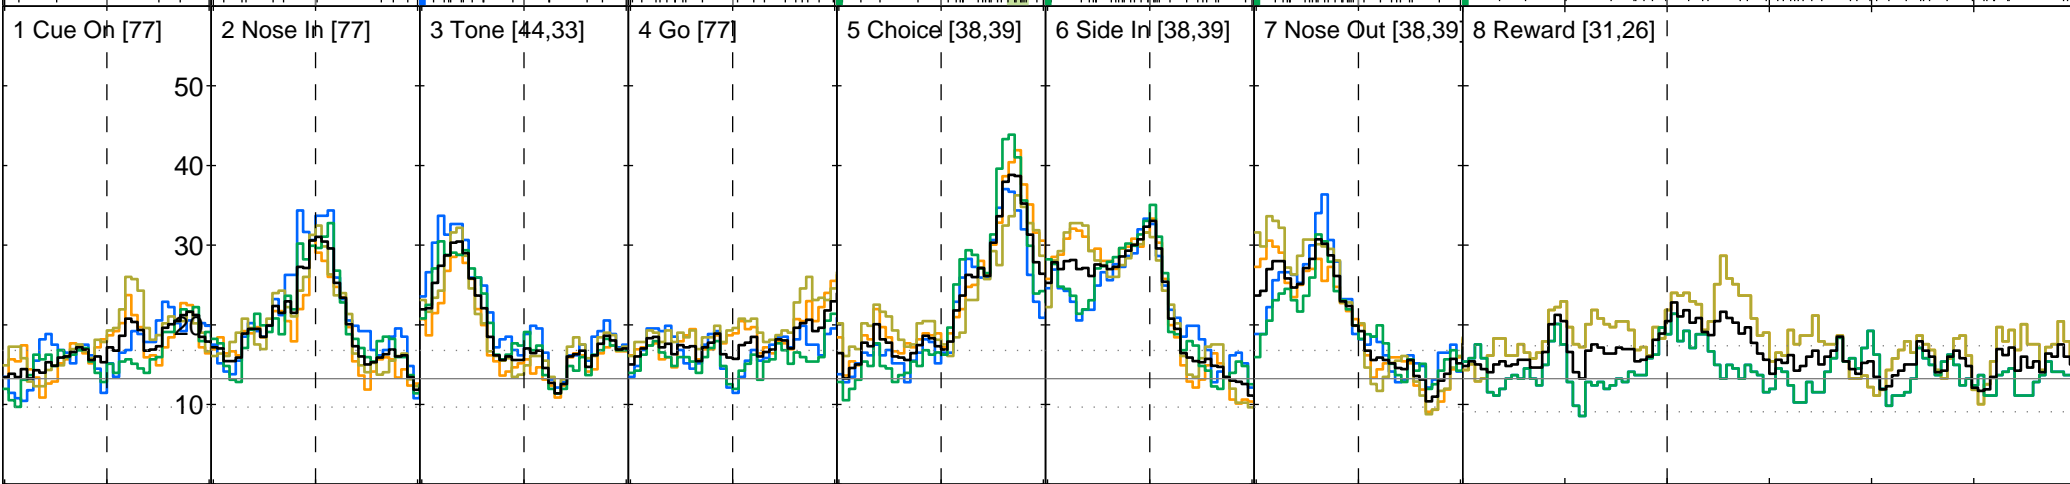

**Cell: C1220071025T03b**

AP: 3.2 ML: 2.6 DV: 2

w: 1 n: 46080  $P_{ISI>2}$ : 0.006

1/2pw: 293 $\mu$ s p->v: 741 $\mu$ s

$\beta_T$ : -2.8  $\beta_D$ : -4.2

$\beta_P$ : 2.4 SI: -0.38

Session FR: 6.83 Hz

Pk Ev: 6 - Side In (Contra)

Pk FR: 22.5Hz (0.06s) **M1<sub>p</sub>**

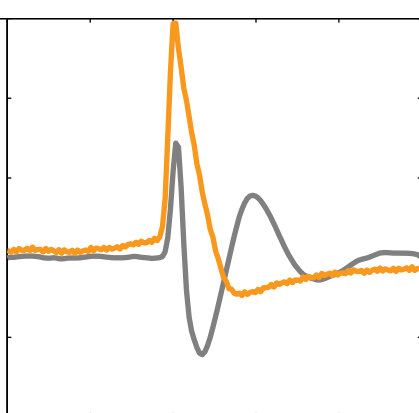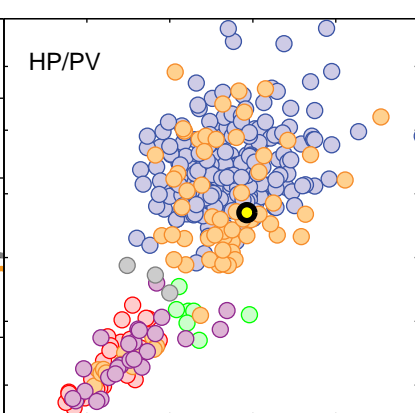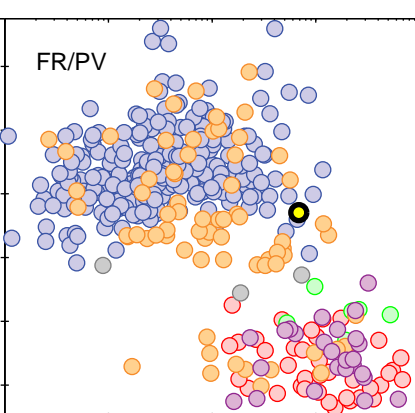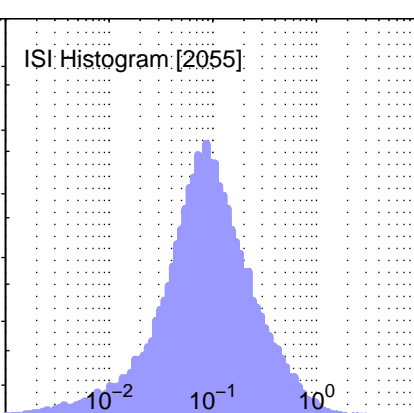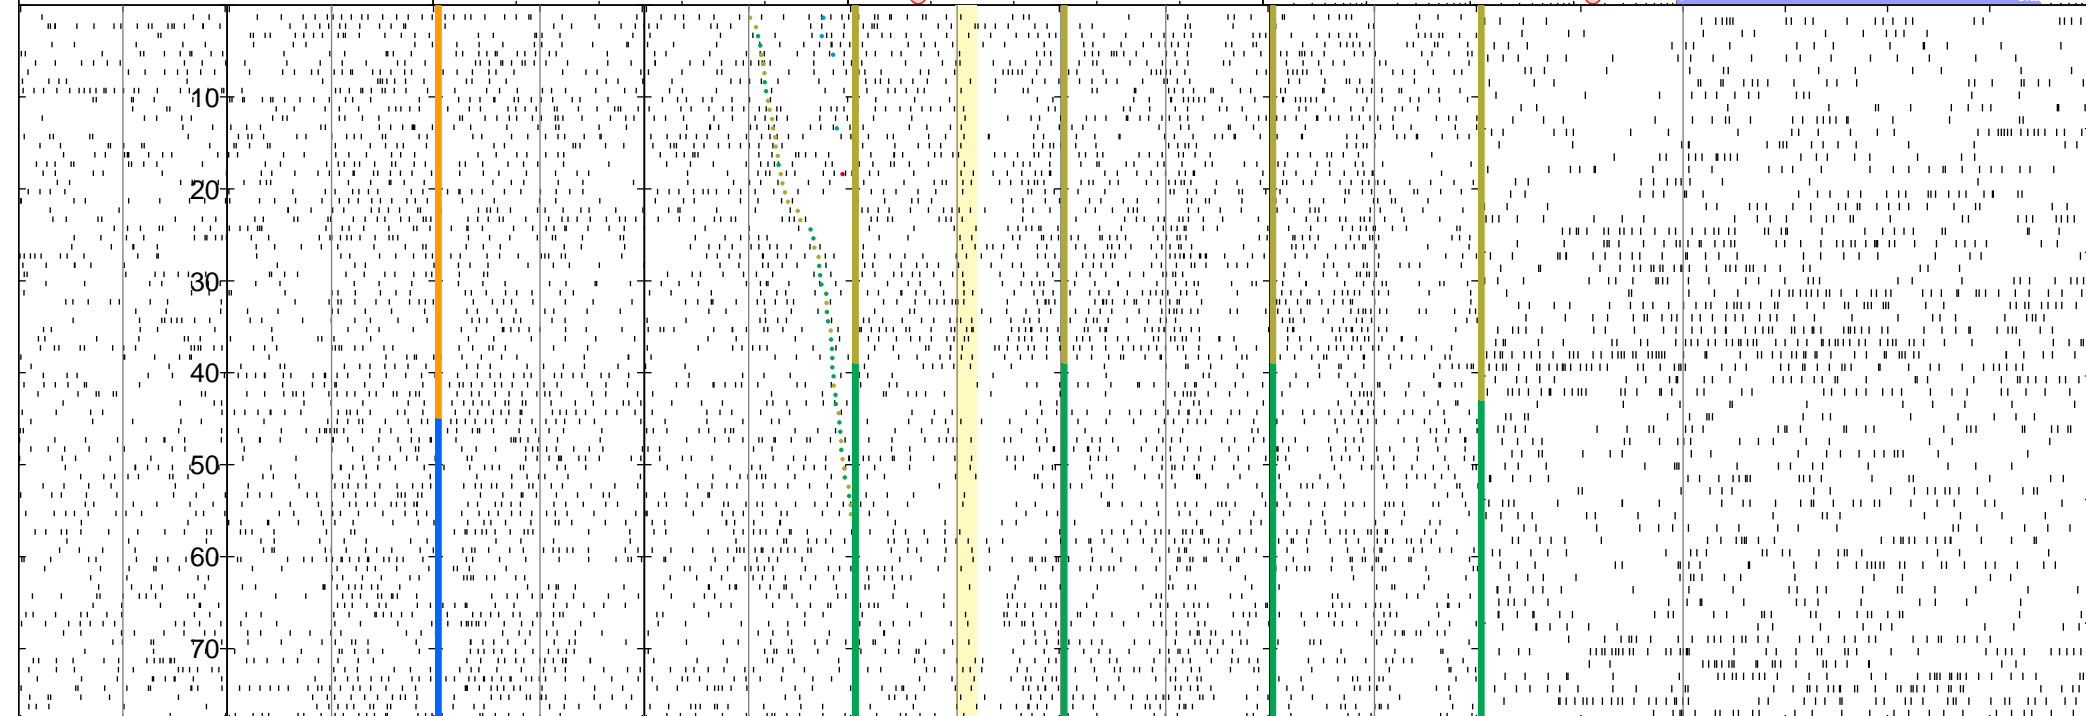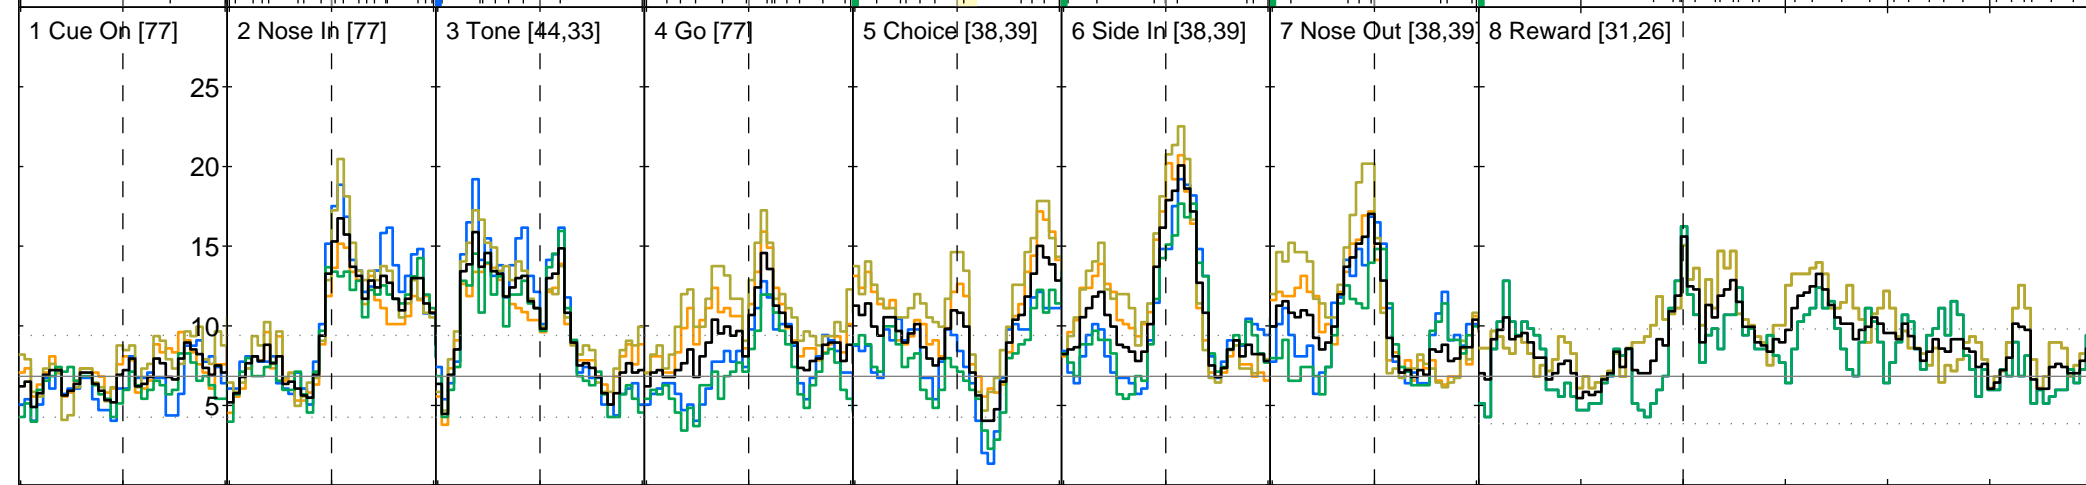

**Cell: C1220071025T03c**

AP: 3.2 ML: 2.6 DV: 2

w: 3 n: 850  $P_{ISI>2}$ : 0.991/2pw: 358 $\mu$ s p $\rightarrow$ v: 666 $\mu$ s $\beta_T$ : -1.3  $\beta_D$ : 0.79 $\beta_P$ : 1.8 SI: -0.34

Session FR: 0.154 Hz

Pk Ev: 6 - Side In (Contra)

Pk FR: 9.36Hz (0.48s) **M1<sub>p</sub>**

Waveform

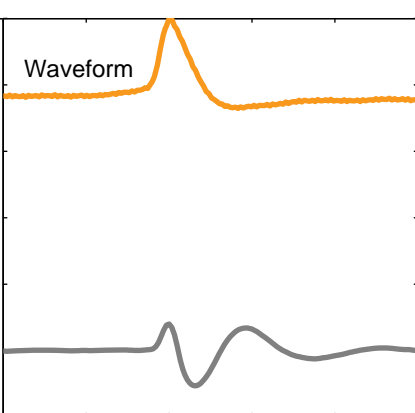

HP/PV

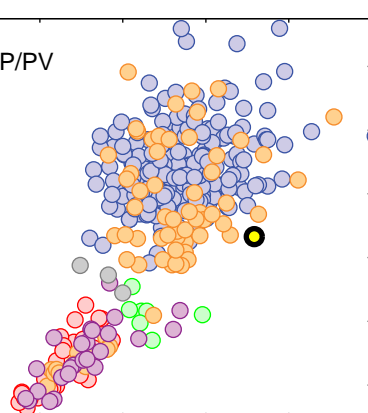

FR/PV

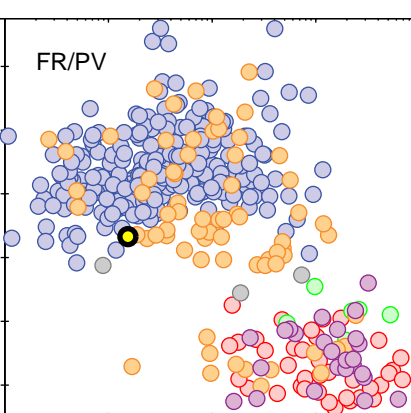

ISI Histogram [28]

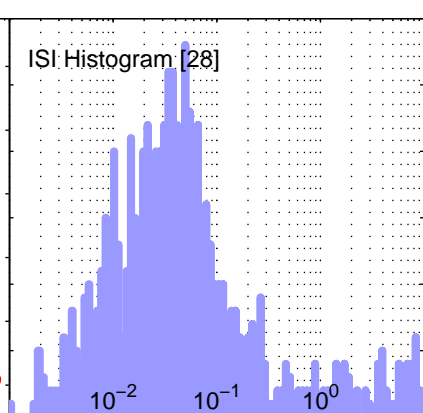

10

20

30

40

50

60

70

1 Cue On [77]

2 Nose In [77]

3 Tone [44,33]

4 Go [77]

5 Choice [38,39]

6 Side In [38,39]

7 Nose Out [38,39]

8 Reward [31,26]

8

6

4

2

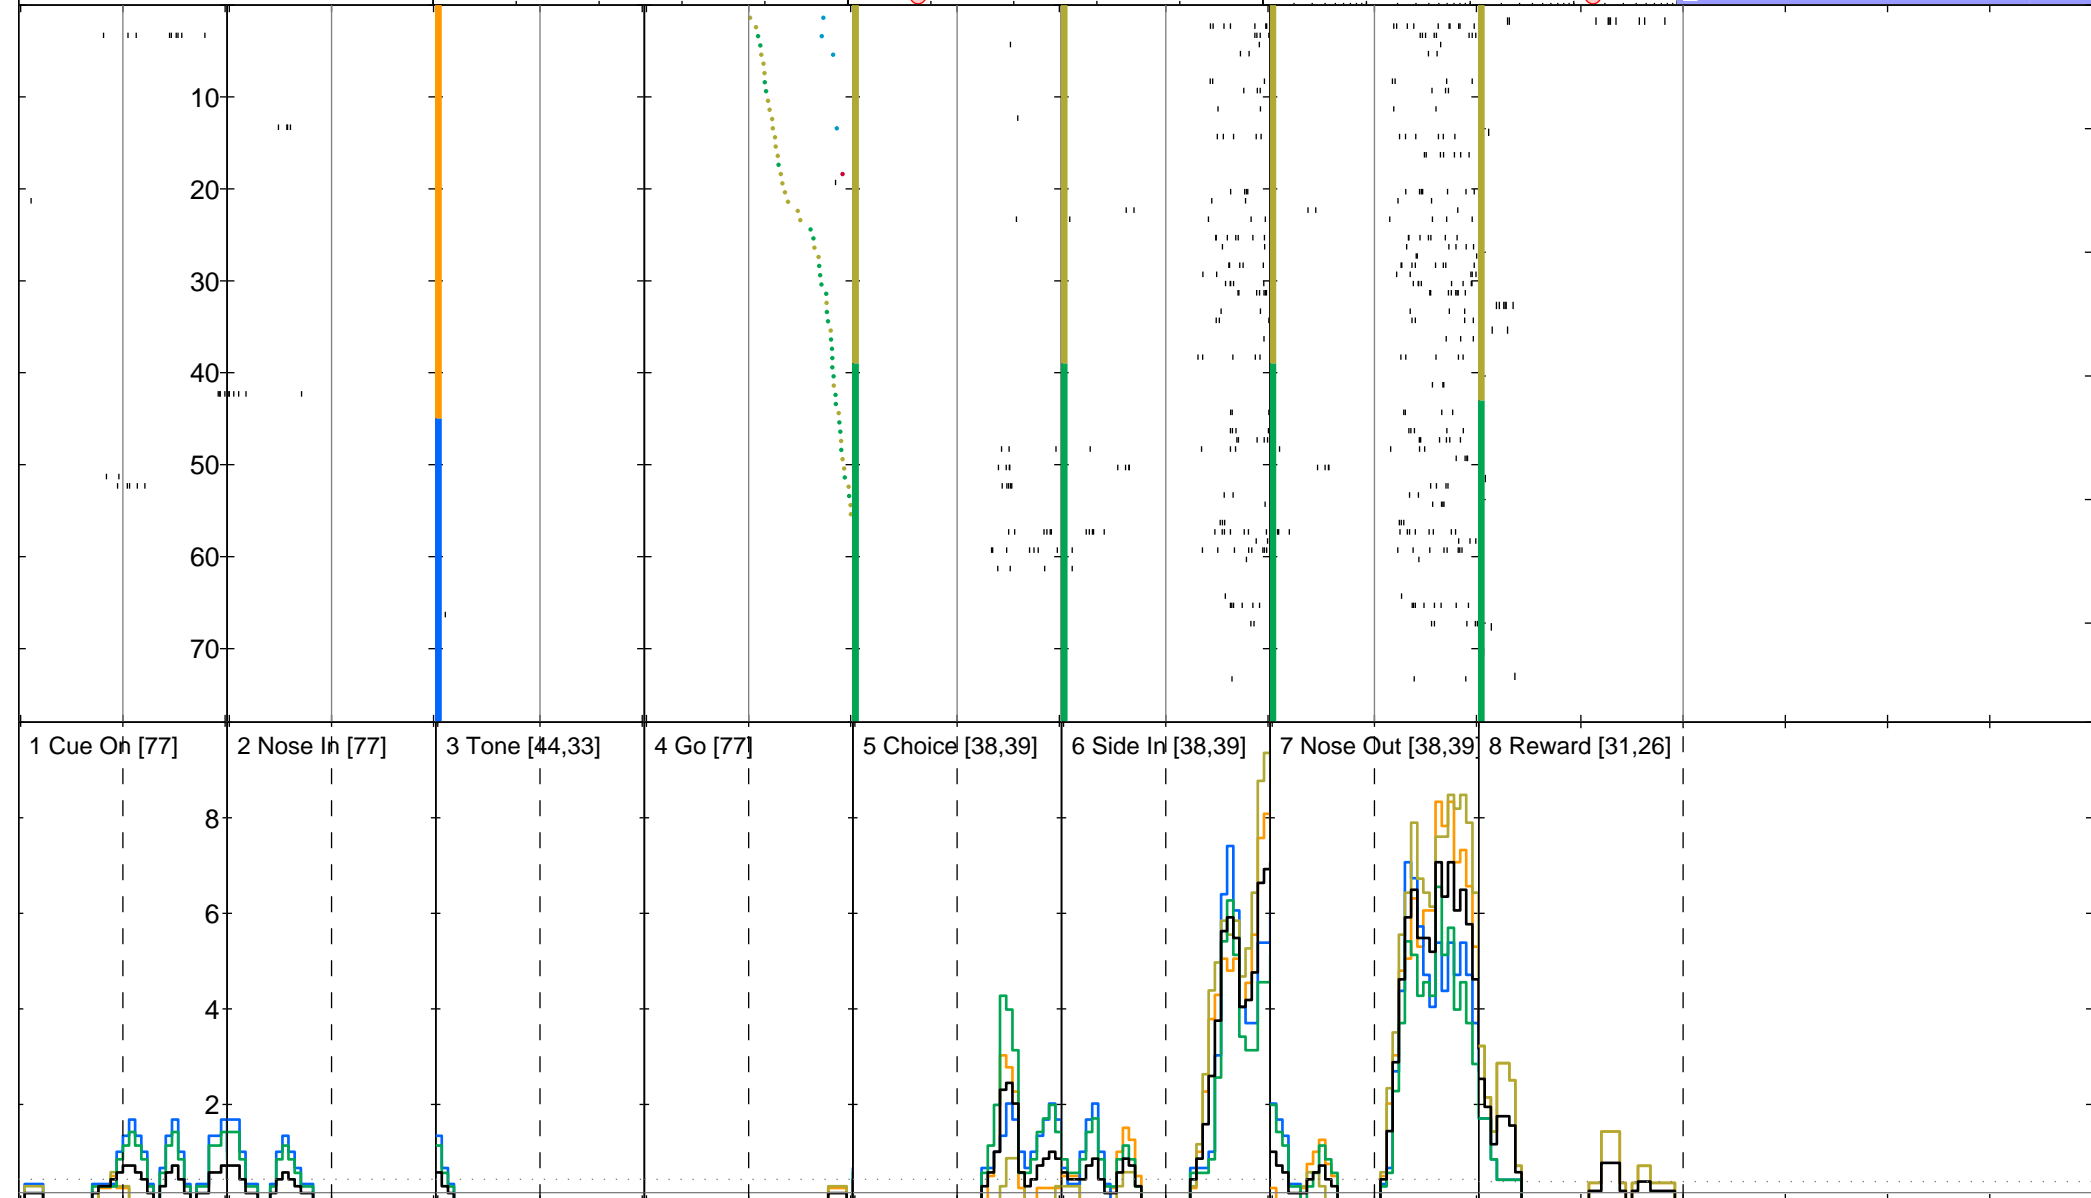

**Cell: C1220071022T03a**

AP: 3.2 ML: 2.6 DV: 1.8

w: 4 n: 584  $P_{ISI>2}$ : 0.821/2pw: 370 $\mu$ s p $\rightarrow$ v: 923 $\mu$ s $\beta_T$ : NaN  $\beta_D$ : NaN $\beta_P$ : NaN SI: 0.6

Session FR: 0.587 Hz

Pk Ev: 7 - Nose out (Ipsi)

Pk FR: 6.94Hz (-0.33s) **M1<sub>p</sub>**

Waveform

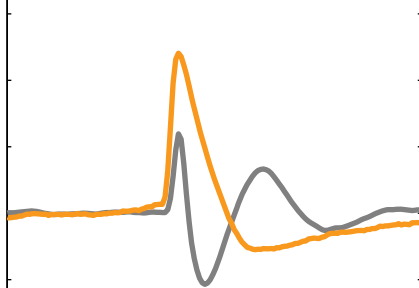

HP/PV

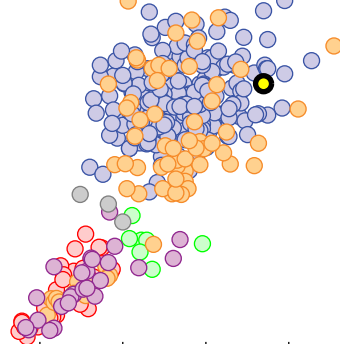

FR/PV

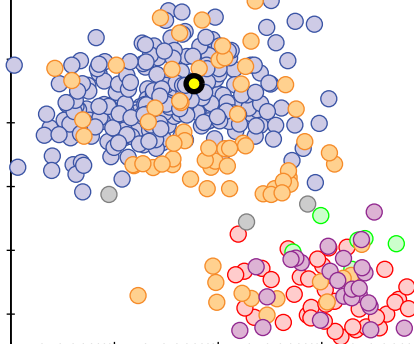

ISI Histogram [14]

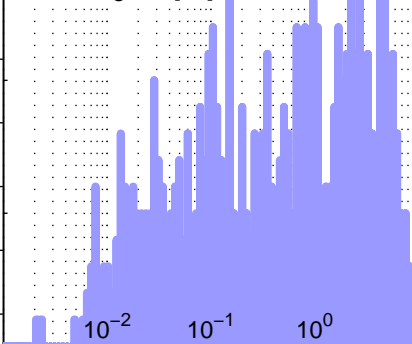5  
10  
15  
20  
25

1 Cue On [24]

2 Nose In [24]

3 Tone [14,10]

4 Go [24]

5 Choice [16,8]

6 Side In [16,8]

7 Nose Out [16,8]

8 Reward [13,7]

7  
6  
5  
4  
3  
2  
1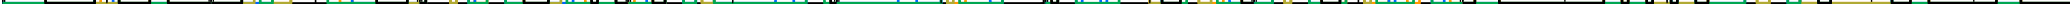

**Cell: C1220071025T01b**

AP: 4.2 ML: 3.6 DV: 1.6  
w: 2 n: 11684  $P_{ISI>2}$ : 0.4  
1/2pw: 363 $\mu$ s p->v: 736 $\mu$ s  
 $\beta_T$ : NaN  $\beta_D$ : NaN  
 $\beta_P$ : NaN SI: NaN  
Session FR: 1.73 Hz  
Pk Ev: 7 - Nose out (Tone2)  
Pk FR: 5.72Hz (0.45s) **M1<sub>p</sub>**

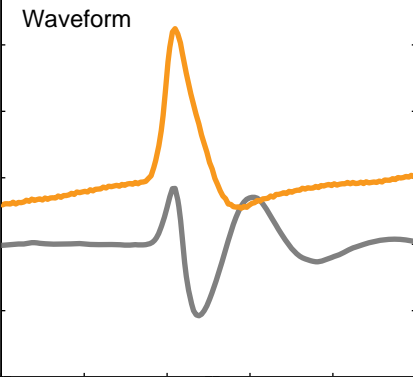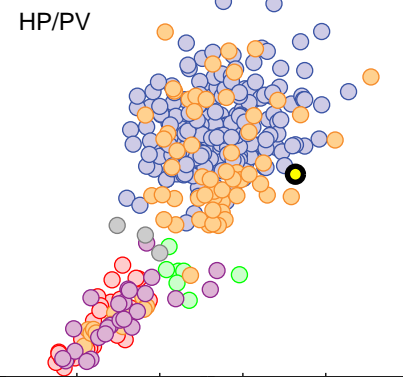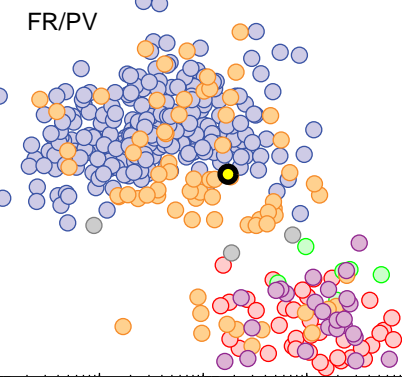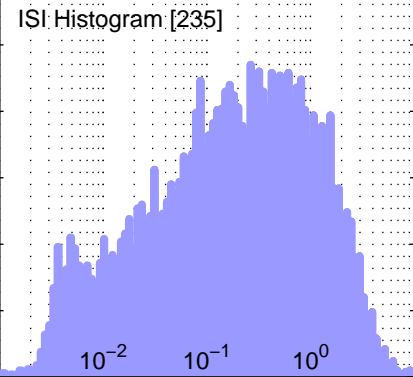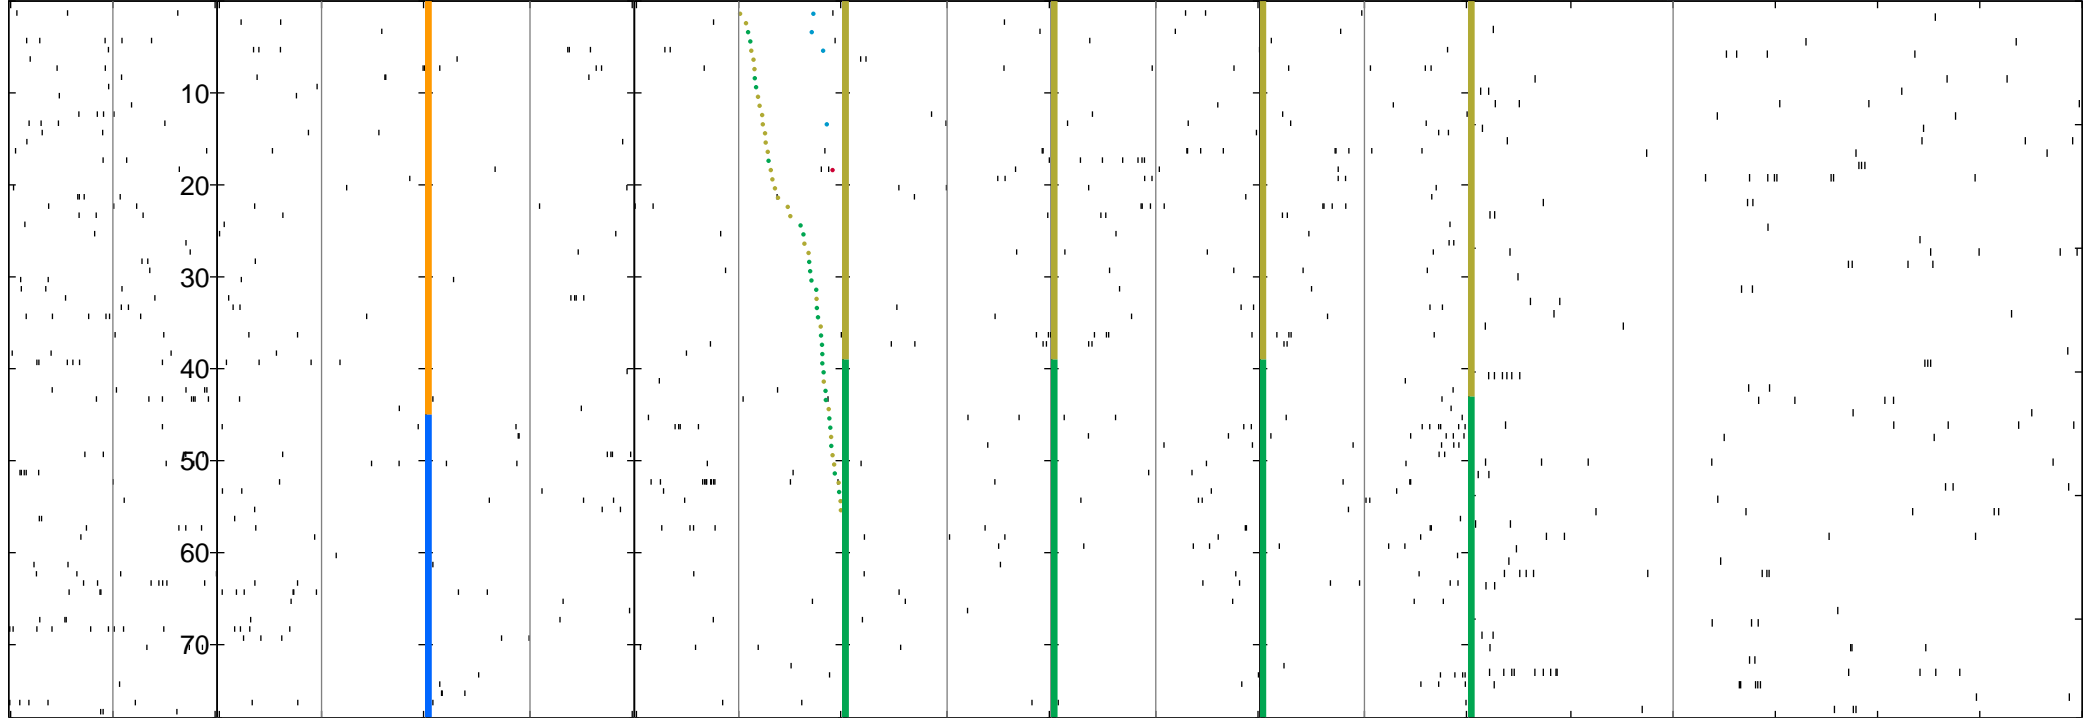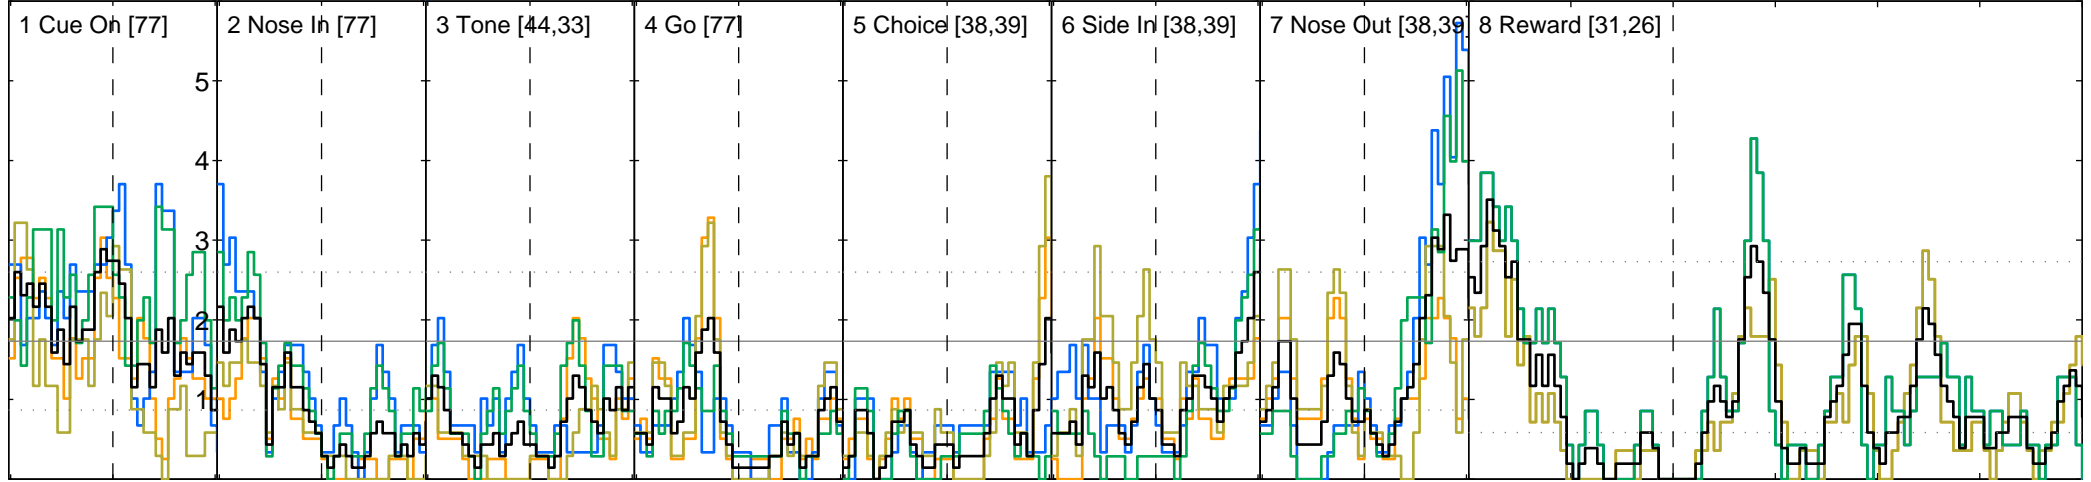

**Cell: C0420070227T02a**

AP: 3.7 ML: 2.8 DV: 3  
w: 4 n: 275  $P_{ISI>2}$ : 0.99  
1/2pw: 214 $\mu$ s p->v: 758 $\mu$ s  
 $\beta_T$ : NaN  $\beta_D$ : NaN  
 $\beta_P$ : NaN SI: NaN  
Session FR: 0.0508 Hz  
Pk Ev: None  
Pk FR: --

M1<sub>P</sub>

Waveform

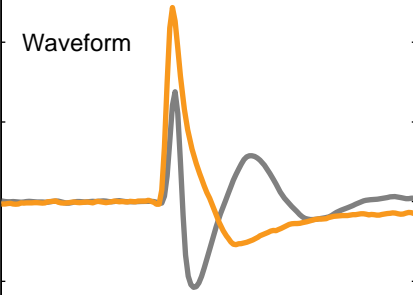

HP/PV

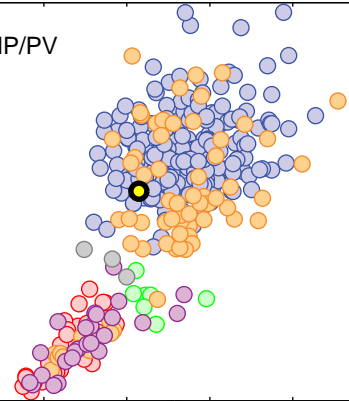

FR/PV

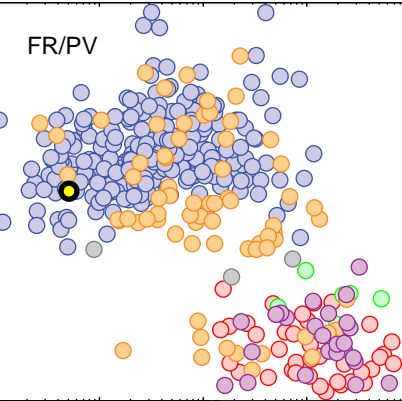

ISI Histogram [10]

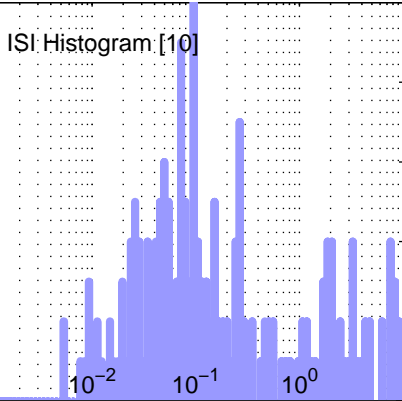

10  
20  
30  
40  
50  
60  
70  
80  
90  
100

1 Cue On [99] 2 Nose In [99] 3 Tone [40,59] 4 Go [99] 5 Choice [61,38] 6 Side In [61,38] 7 Nose Out [61,38] 8 Reward [0,0]

5  
4  
3  
2  
1

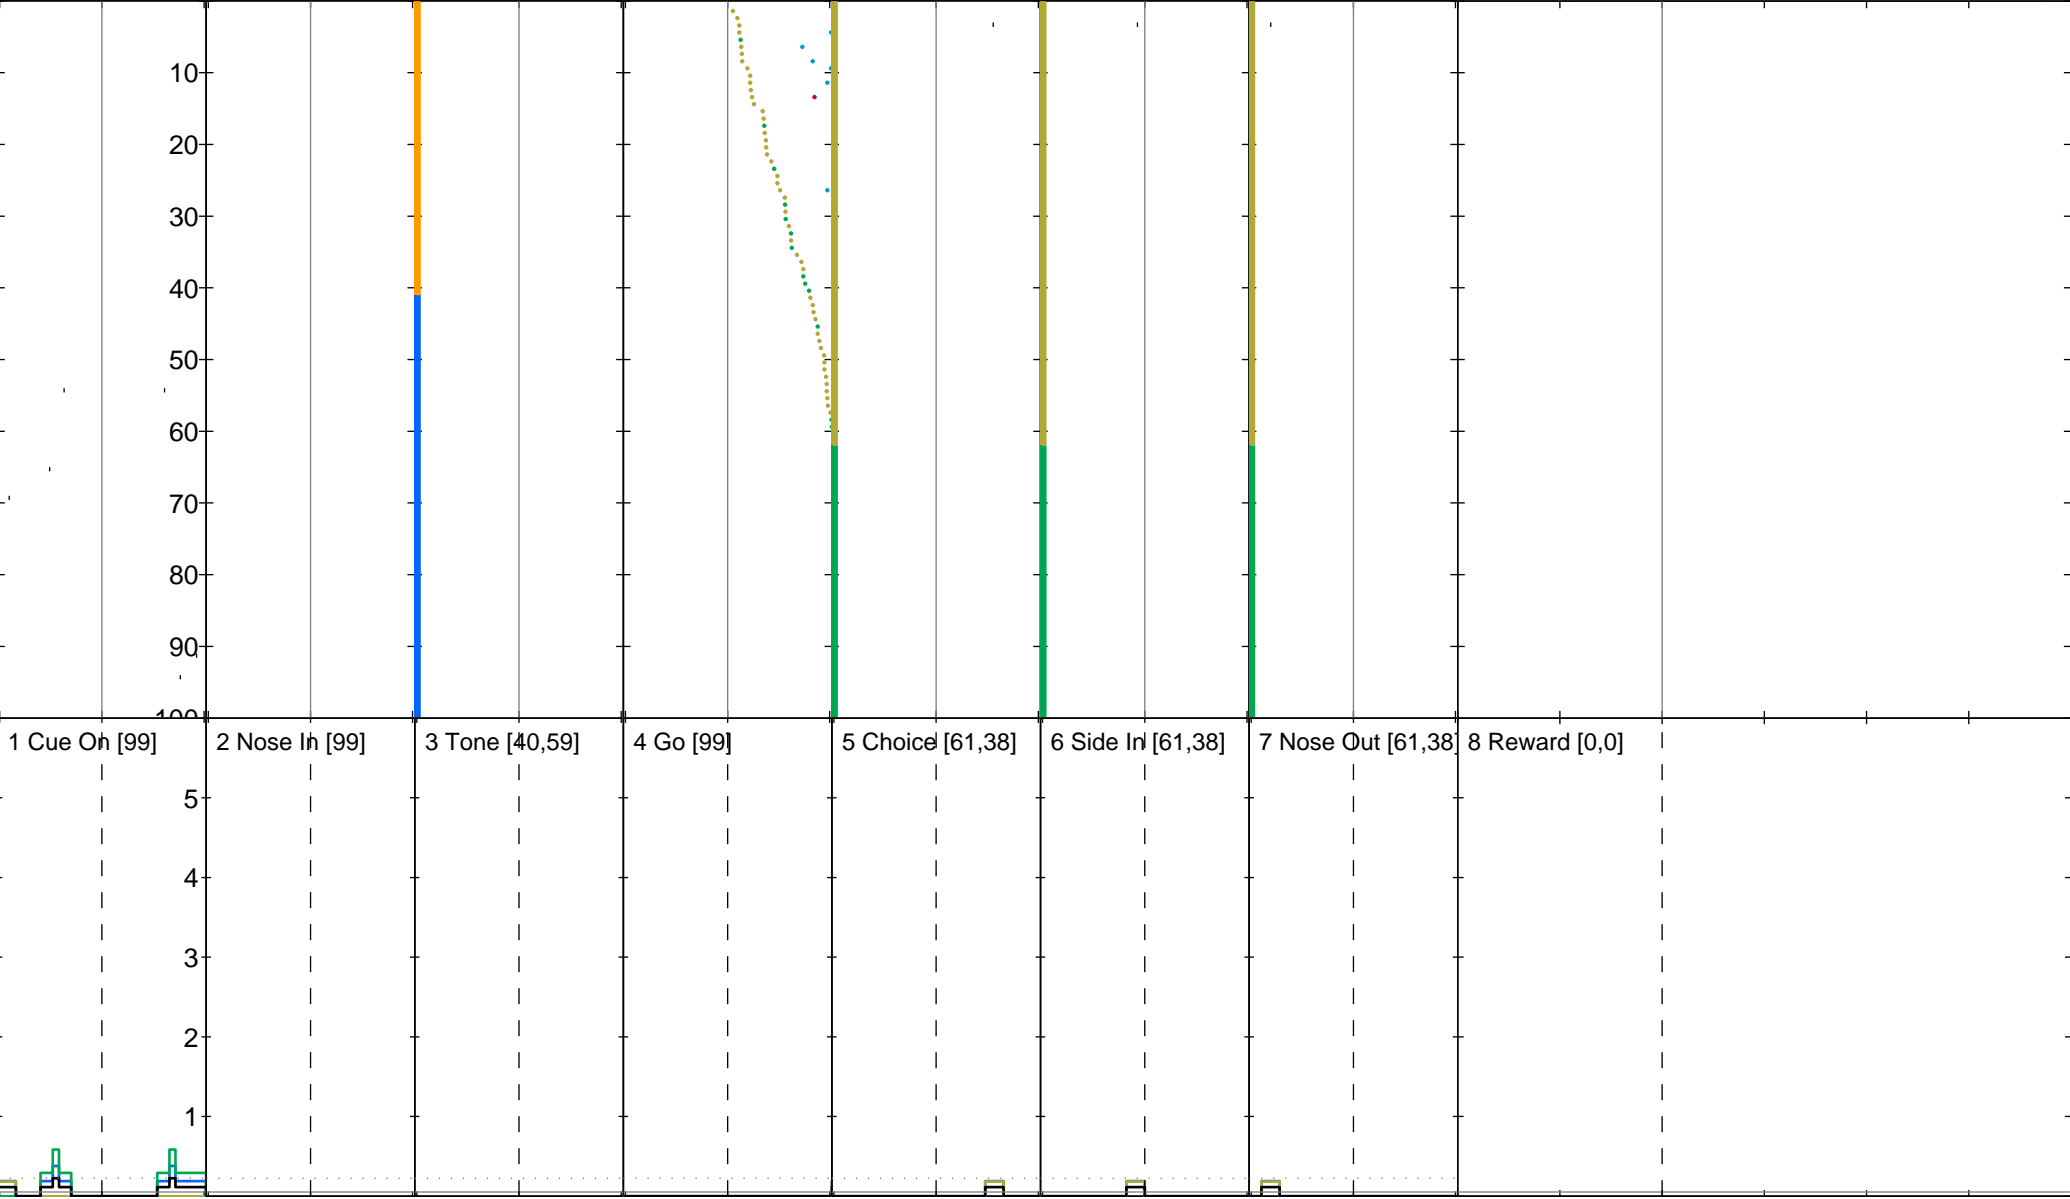



**Cell: C1220071024T03a**

AP: 3.2 ML: 2.6 DV: 1.9  
w: 4 n: 32949  $P_{ISI>2}$ : 0.048  
1/2pw: 314 $\mu$ s p->v: 920 $\mu$ s  
 $\beta_T$ : 3  $\beta_D$ : -4.8  
 $\beta_P$ : -3.3 SI: NaN  
Session FR: 4.47 Hz  
Pk Ev: 8 - Reward (T1/Con) **M1<sub>p</sub>**  
Pk FR: 13Hz (-0.49s)

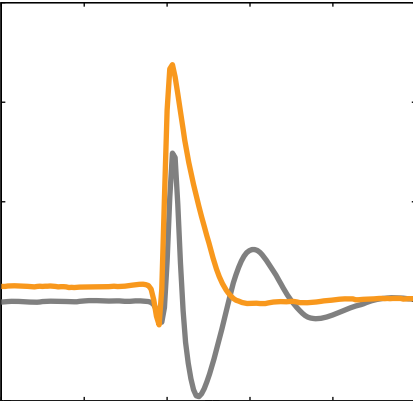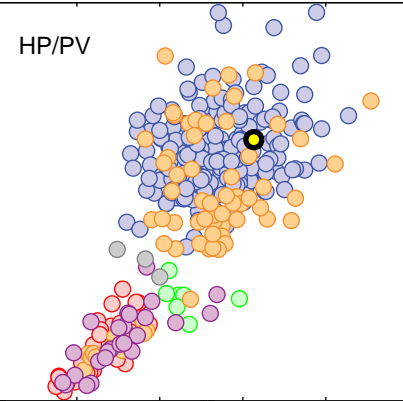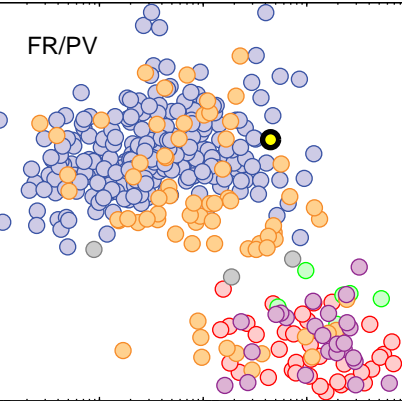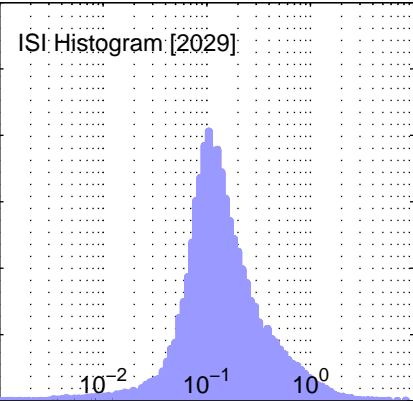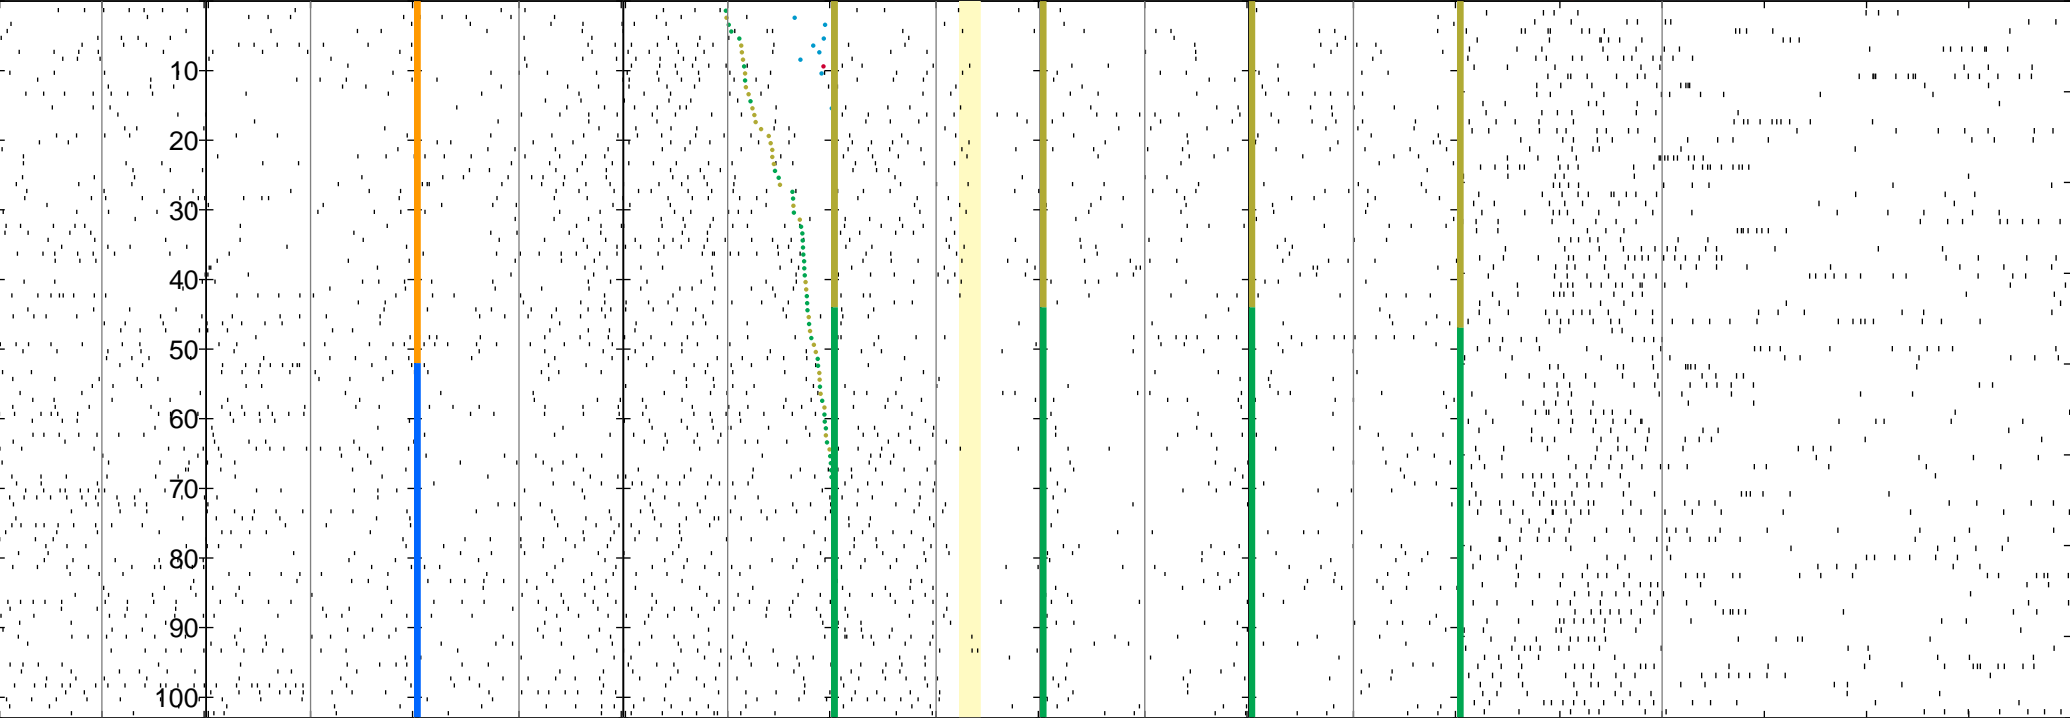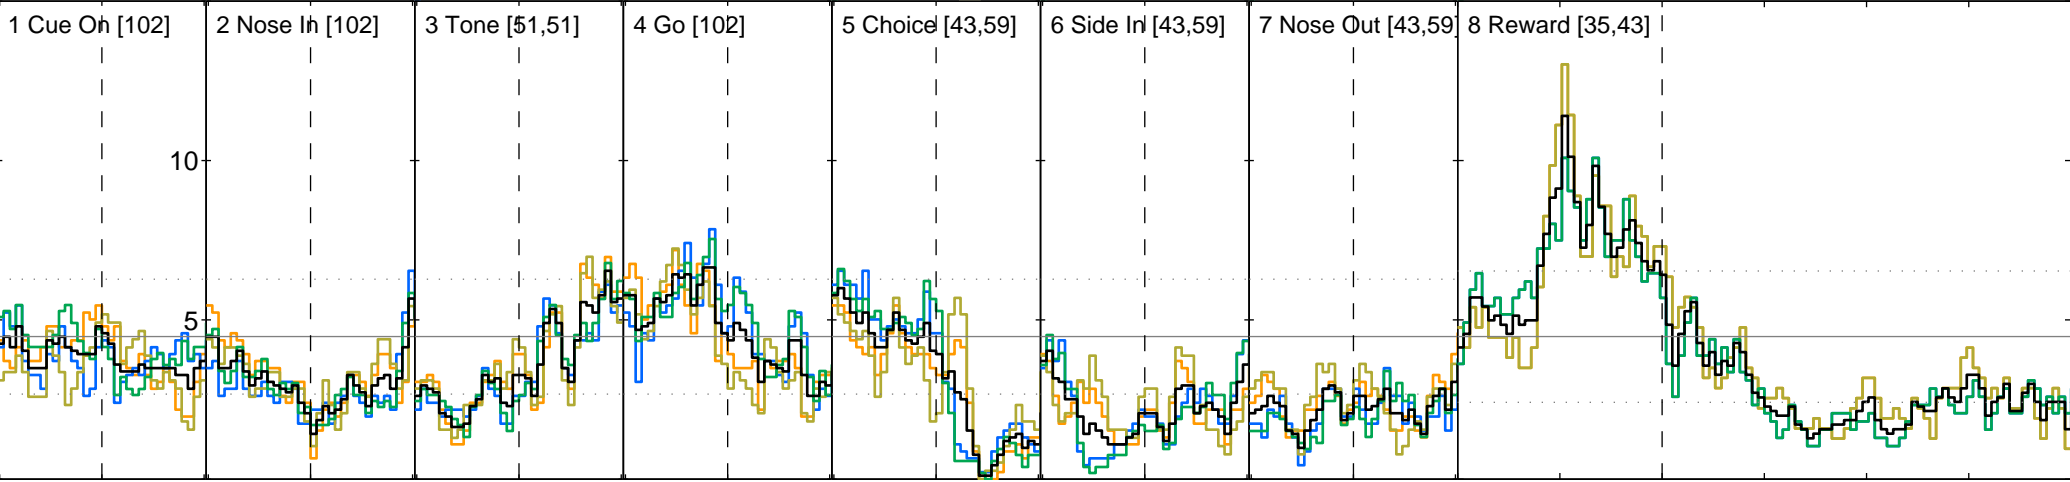

Cell: C1220071025T03a

AP: 3.2 ML: 2.6 DV: 2  
w: 3 n: 12407  $P_{ISI>2}$ : 0.63  
1/2pw: 280 $\mu$ s p->v: 978 $\mu$ s  
 $\beta_T$ : -1.2  $\beta_D$ : -3.2  
 $\beta_P$ : 1.7 SI: NaN  
Session FR: 1.84 Hz  
Pk Ev: 8 - Reward (T2/Ipsi)  
Pk FR: 28.6Hz (-0.43s) **M1<sub>p</sub>**

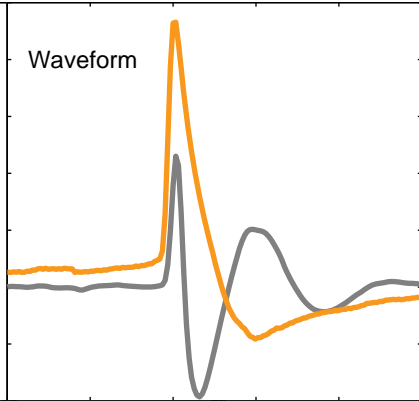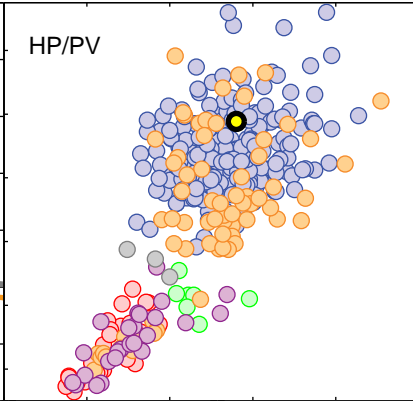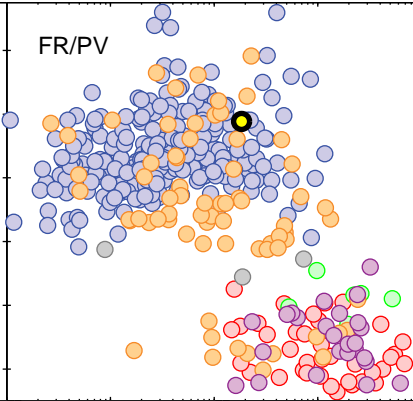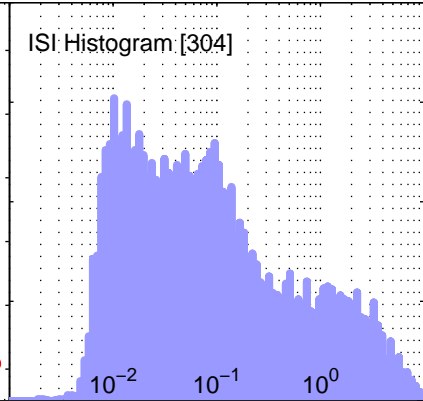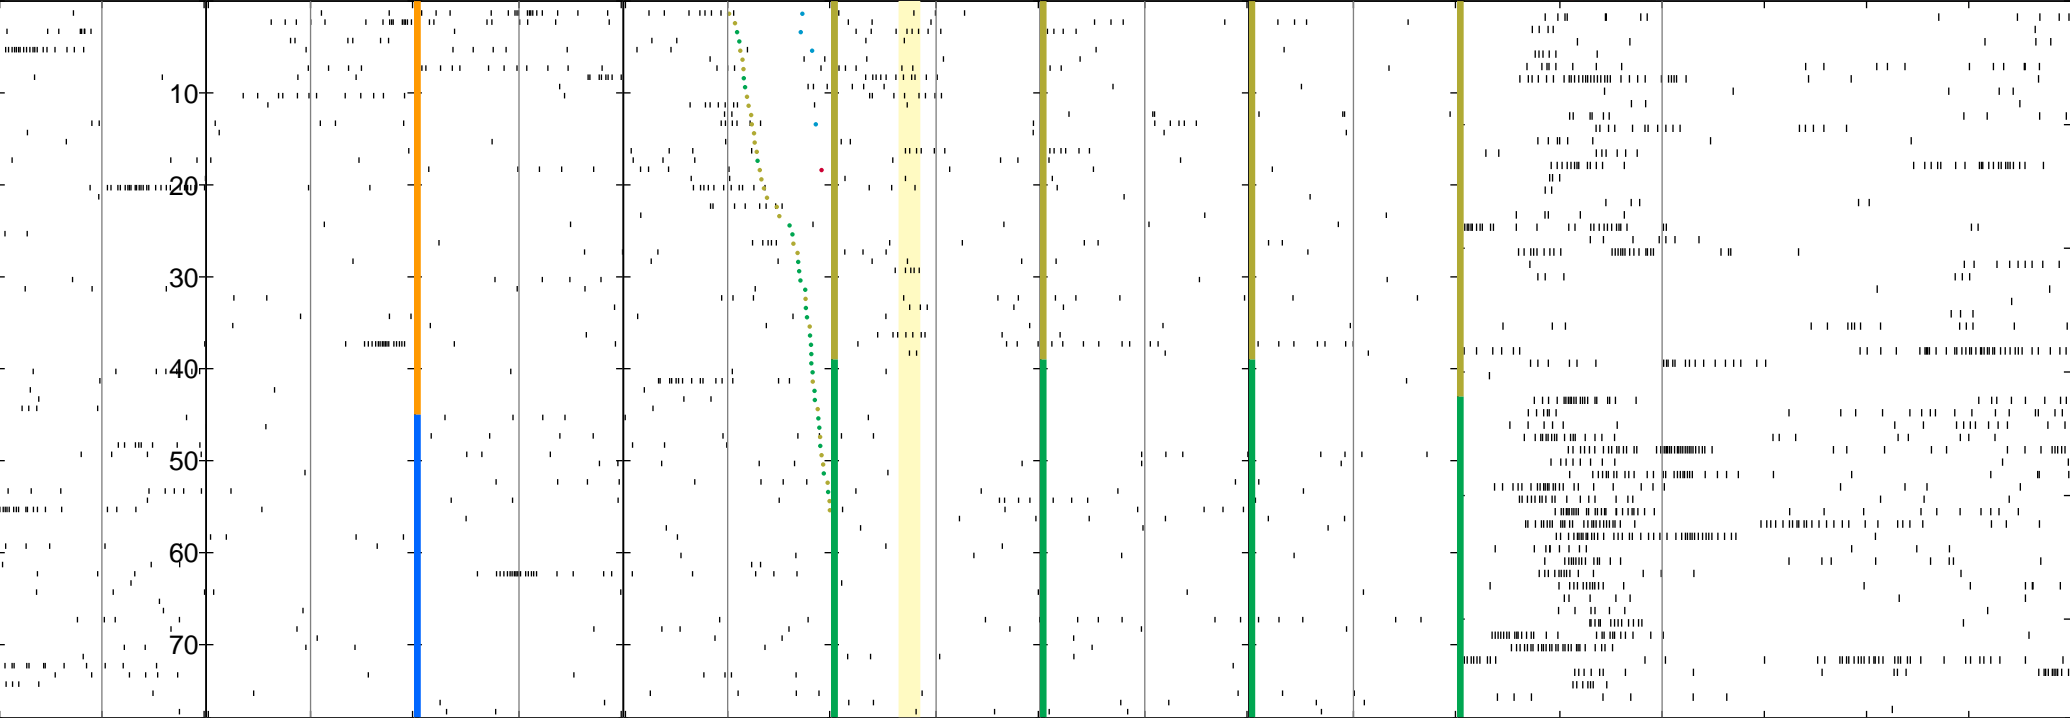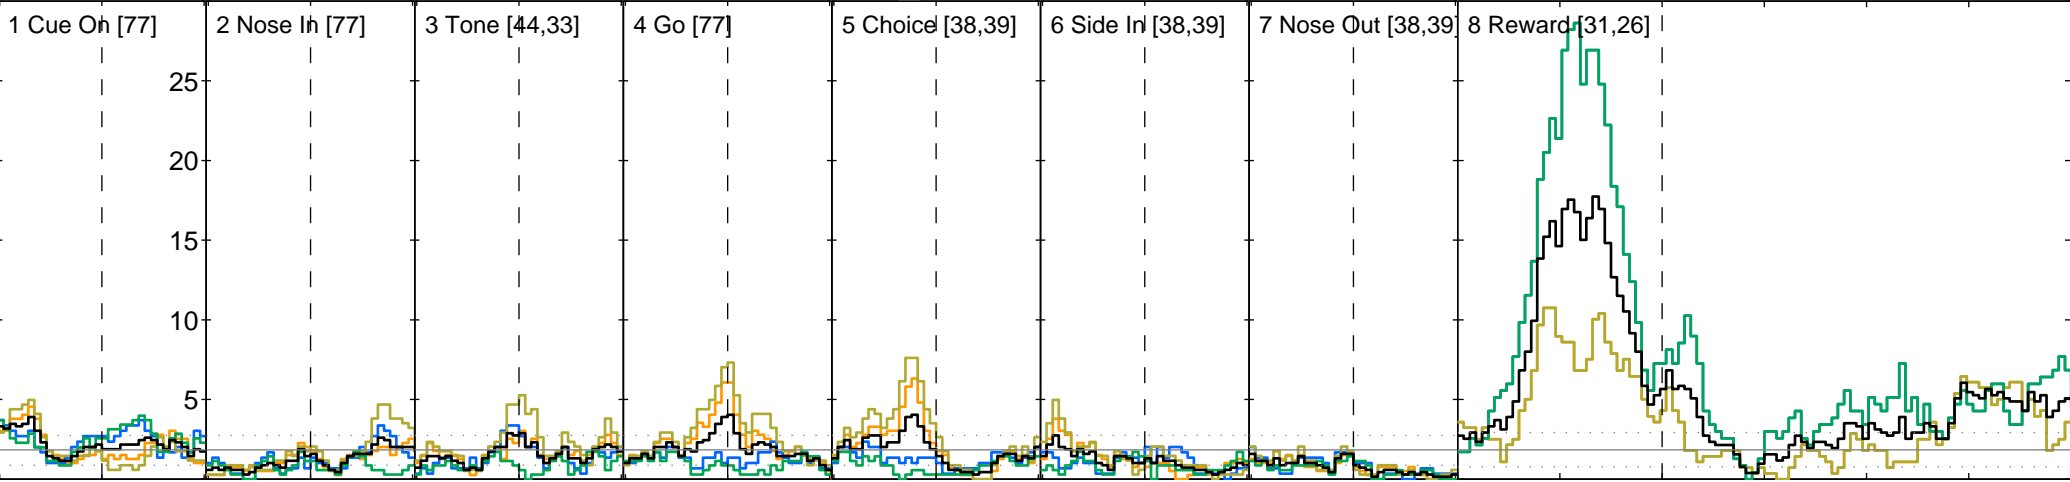

Cell: C1220071024T03b

AP: 3.2 ML: 2.6 DV: 1.9  
w: 4 n: 41688  $P_{ISI>2}$ : 0.0018  
1/2pw: 411 $\mu$ s p->v: 843 $\mu$ s  
 $\beta_T$ : 3  $\beta_D$ : 3.8  
 $\beta_P$ : 2.9 SI: 0.42  
Session FR: 5.66 Hz  
Pk Ev: 8 - Reward (T1/Con) **M1<sub>p</sub>**  
Pk FR: 24.1Hz (-0.4s)

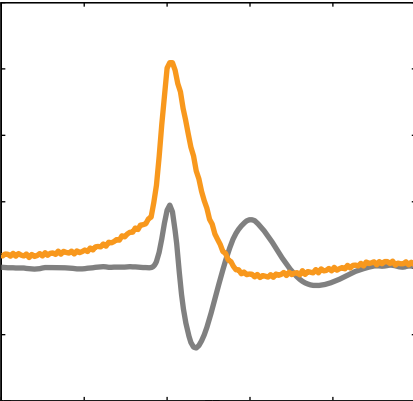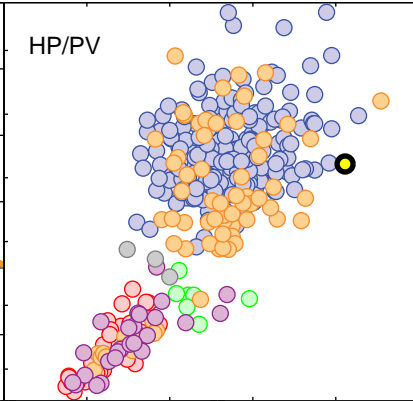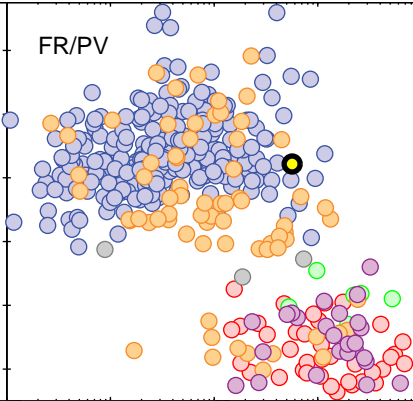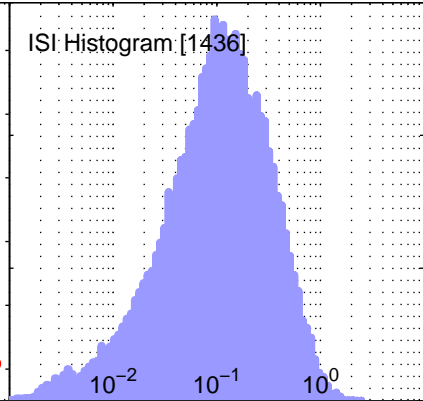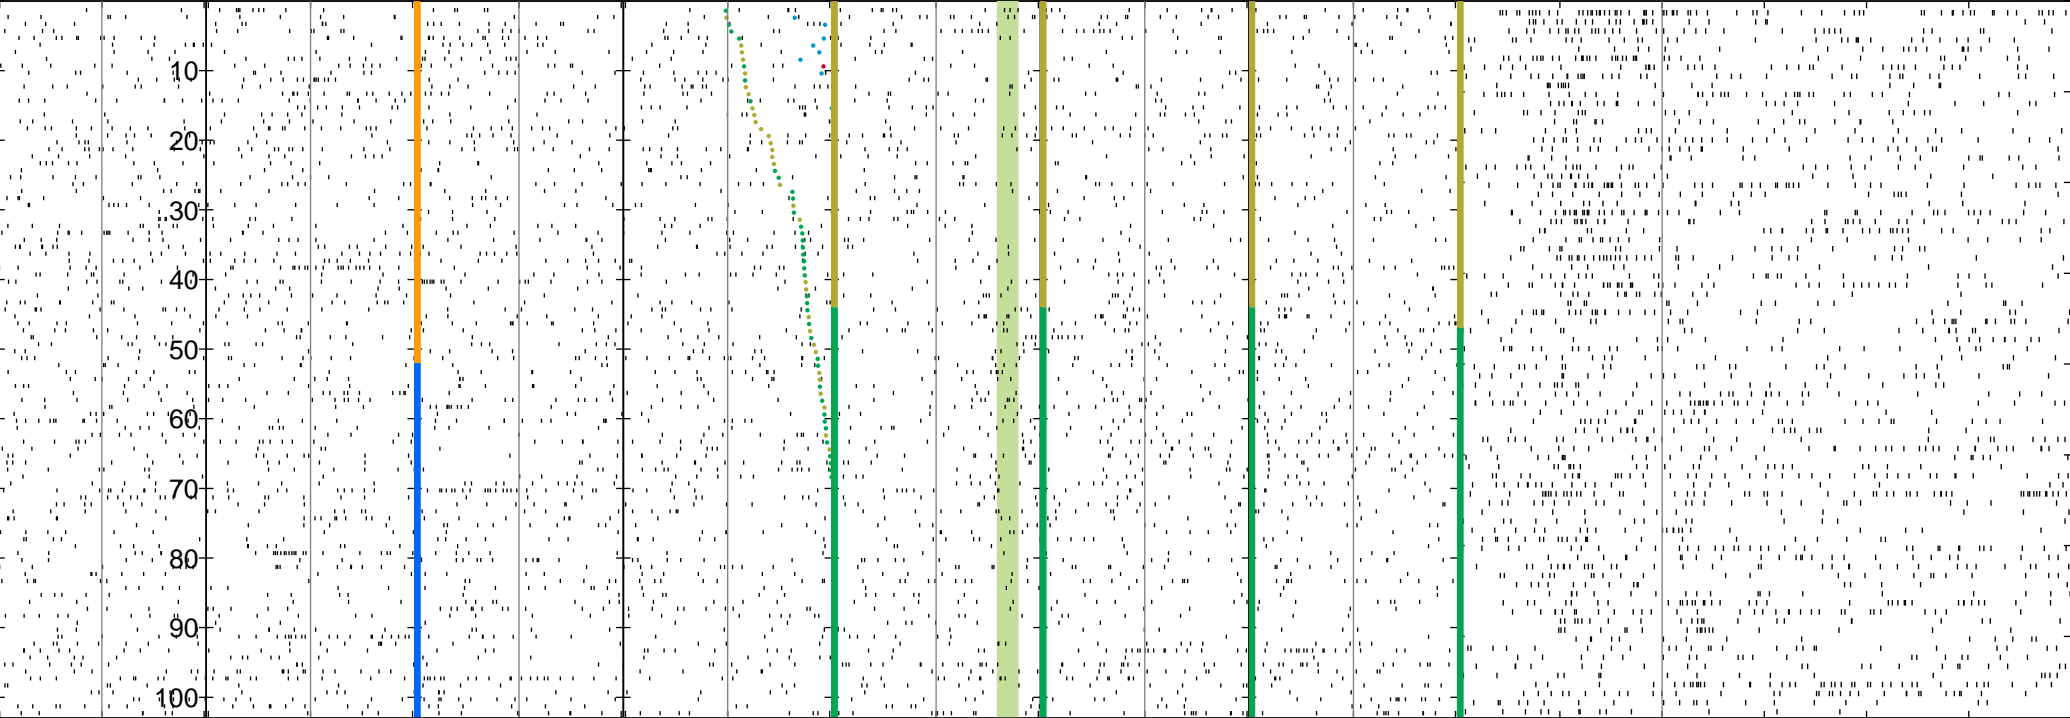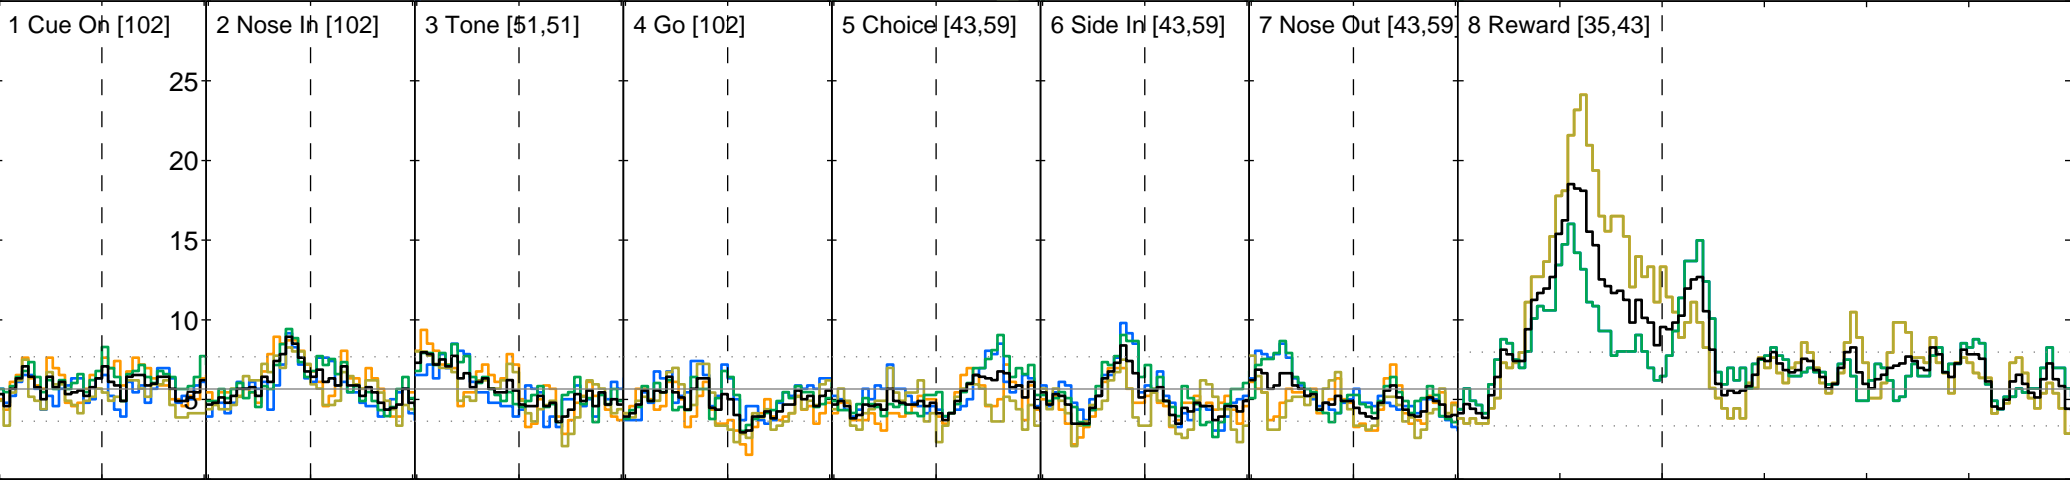

**Cell: C1220071025R01b**

AP: 3.2 ML: 2.6 DV: 2.4

w: 1 n: 724  $P_{ISI>2}$ : 0.94

1/2pw: 293 $\mu$ s p->v: 669 $\mu$ s

$\beta_T$ : NaN  $\beta_D$ : NaN

$\beta_P$ : NaN SI: NaN

Session FR: 0.365 Hz

Pk Ev: 8 - Reward (T2/Ipsi)

Pk FR: 19.3Hz (-0.31s) **M1<sub>p</sub>**

Waveform

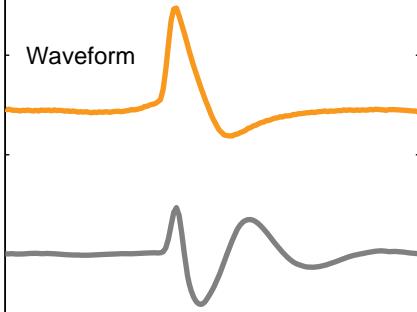

HP/PV

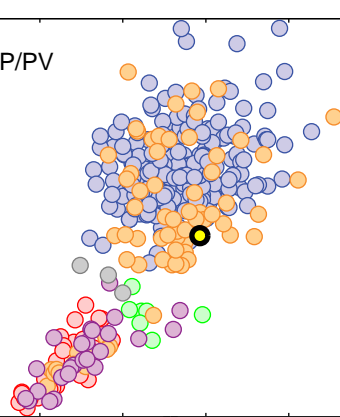

FR/PV

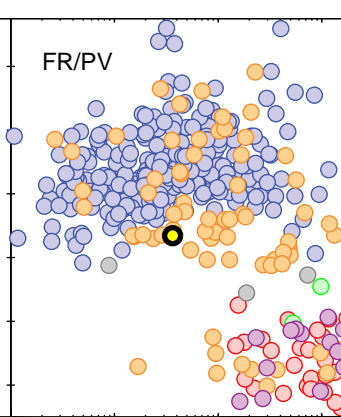

ISI Histogram [16]

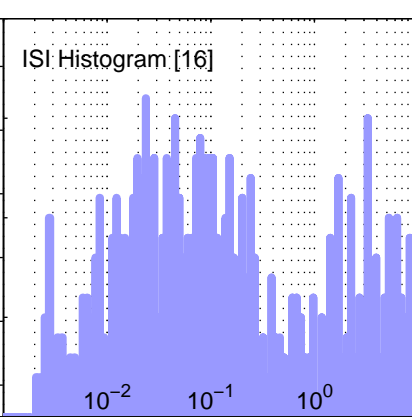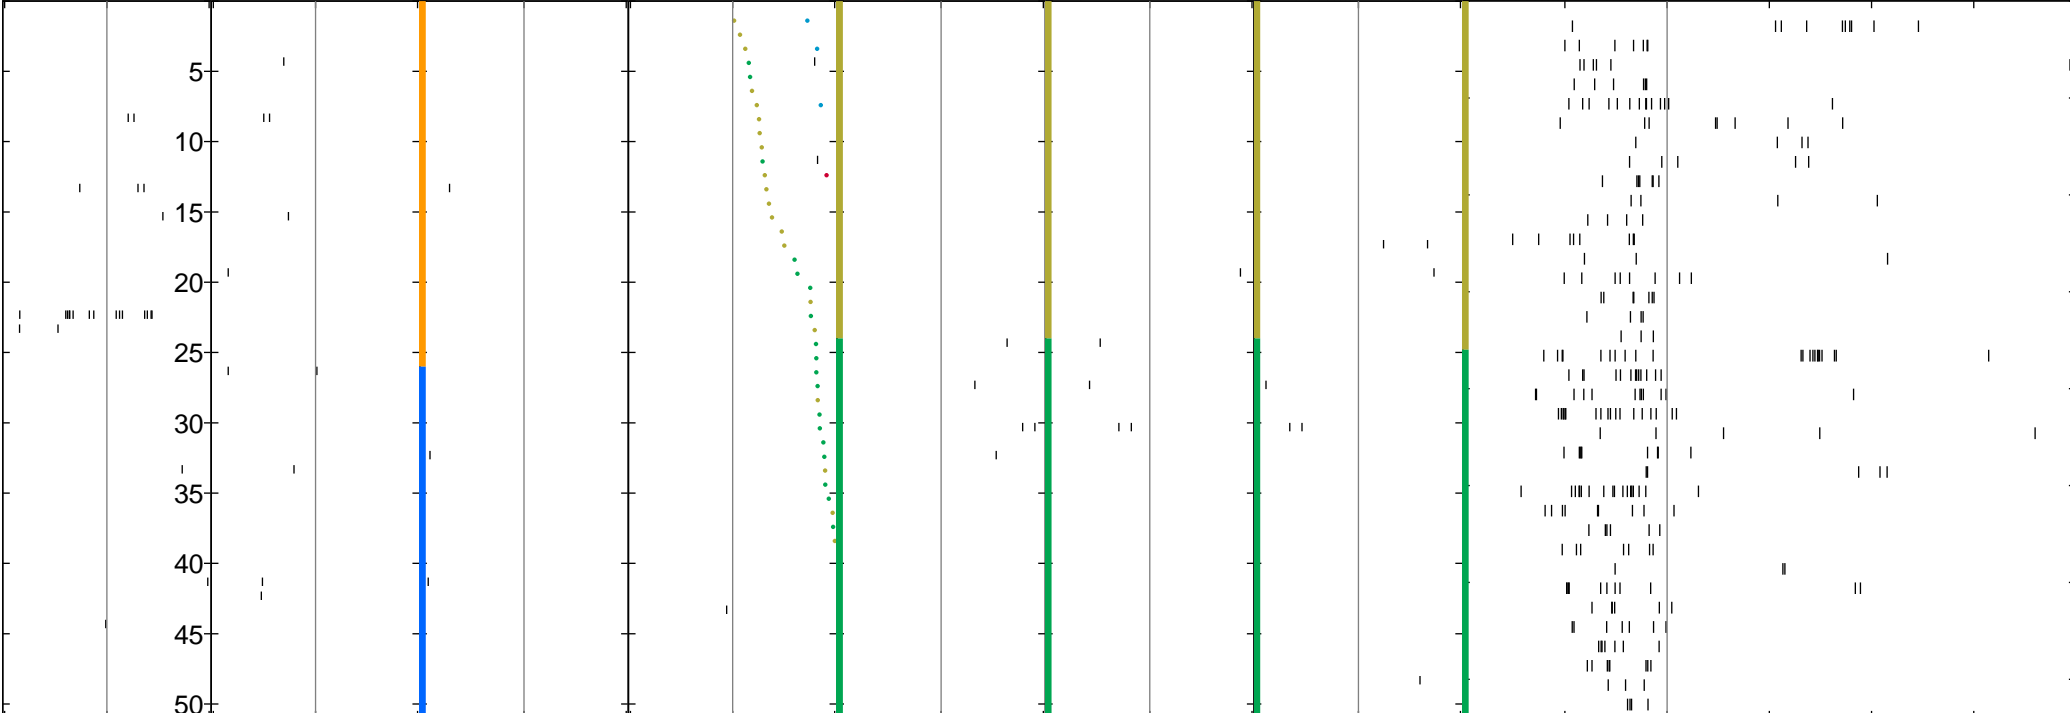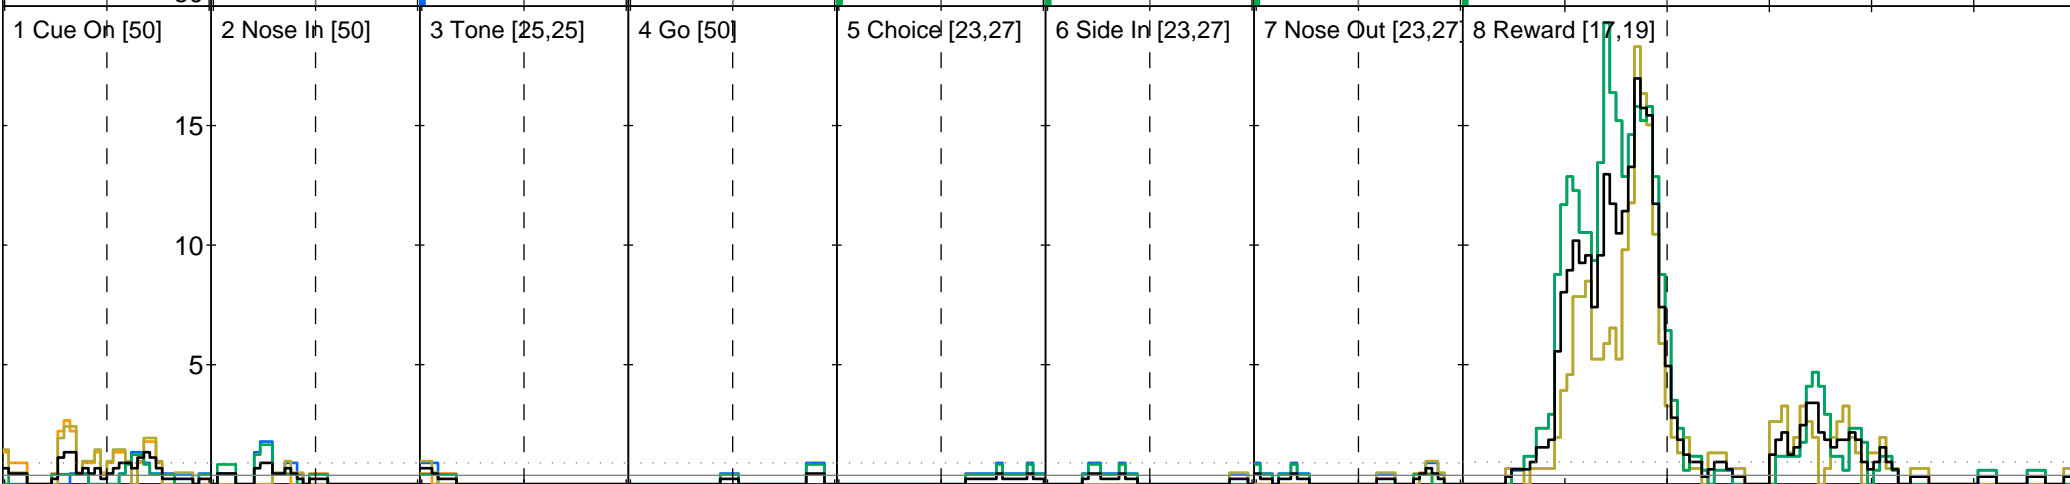

**Cell: C1220071114T03e**

AP: 3.2 ML: 2.6 DV: 2.4

w: 2 n: 5741  $P_{ISI>2}$ : 0.72

1/2pw: 261 $\mu$ s p->v: 680 $\mu$ s

$\beta_T$ : NaN  $\beta_D$ : NaN

$\beta_P$ : NaN SI: NaN

Session FR: 0.942 Hz

Pk Ev: 8 - Reward (T1/Con)

Pk FR: 5.98Hz (-0.22s) **M1<sub>p</sub>**

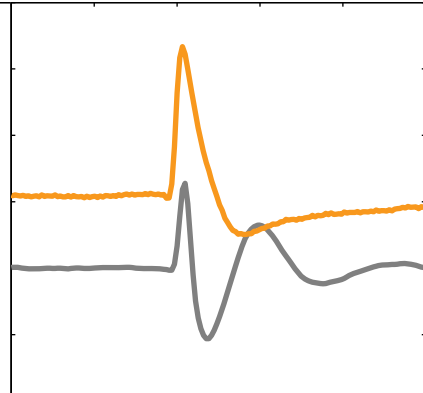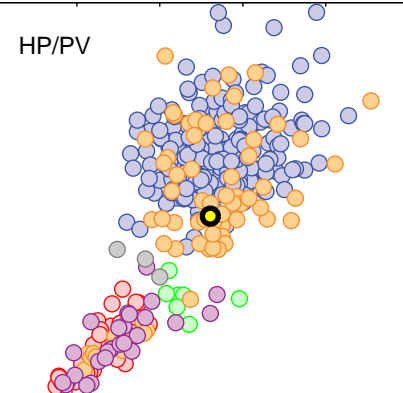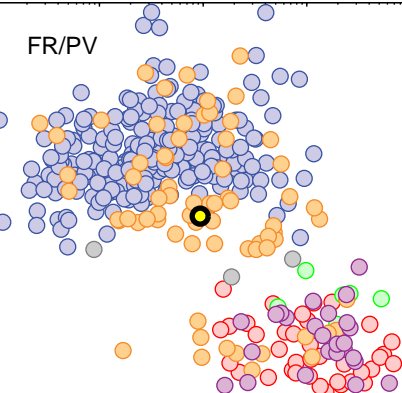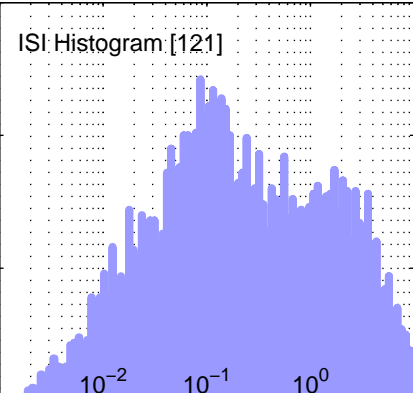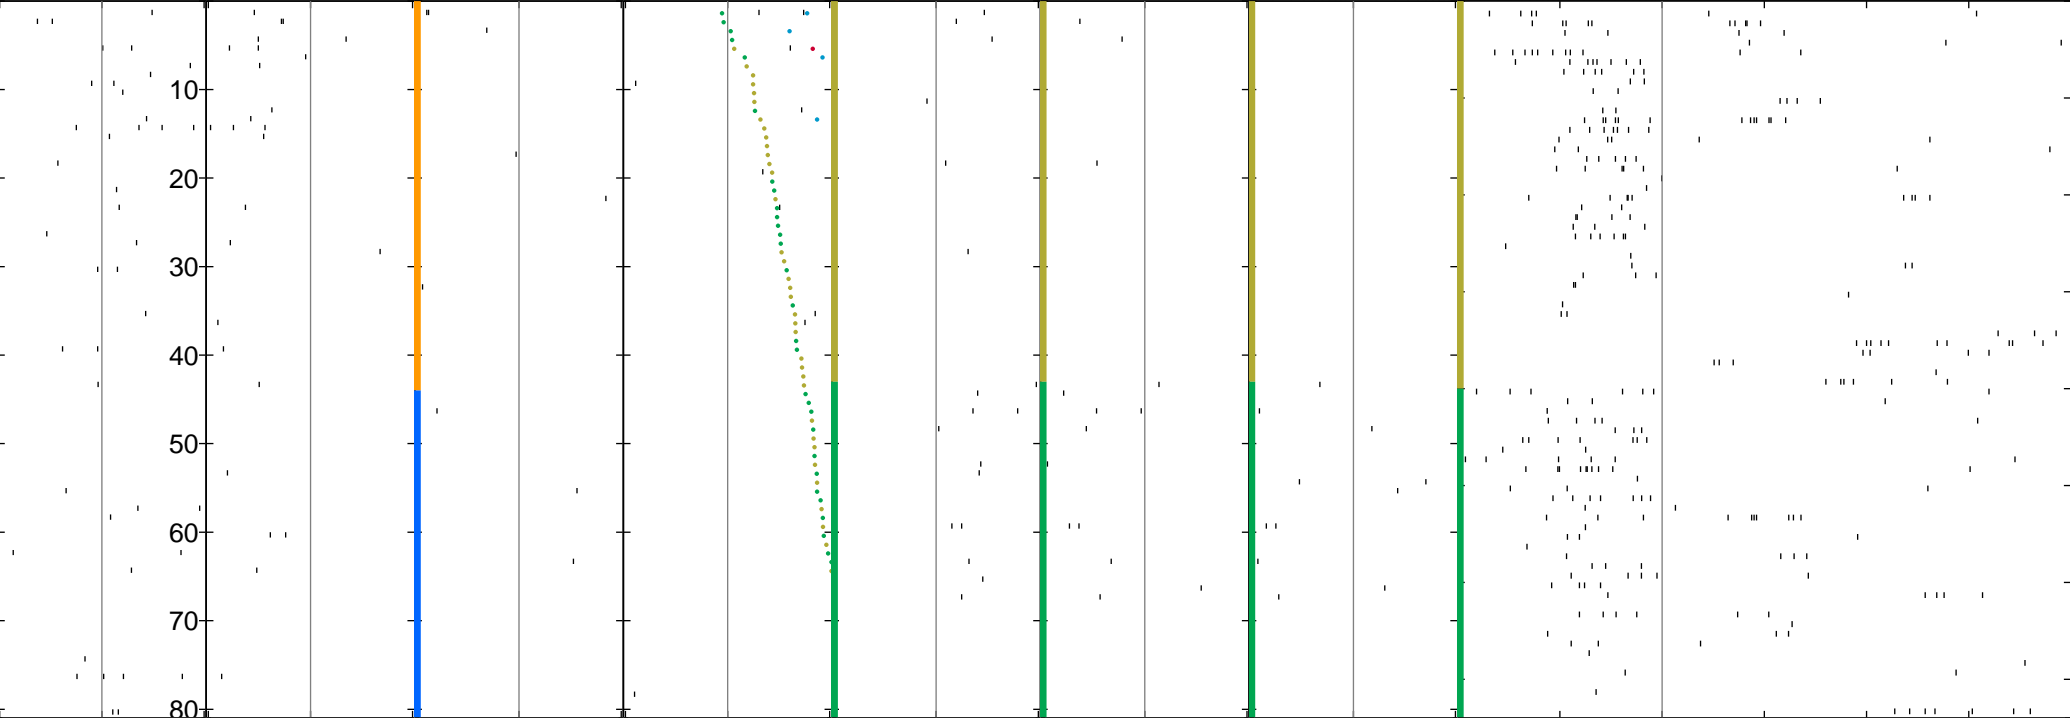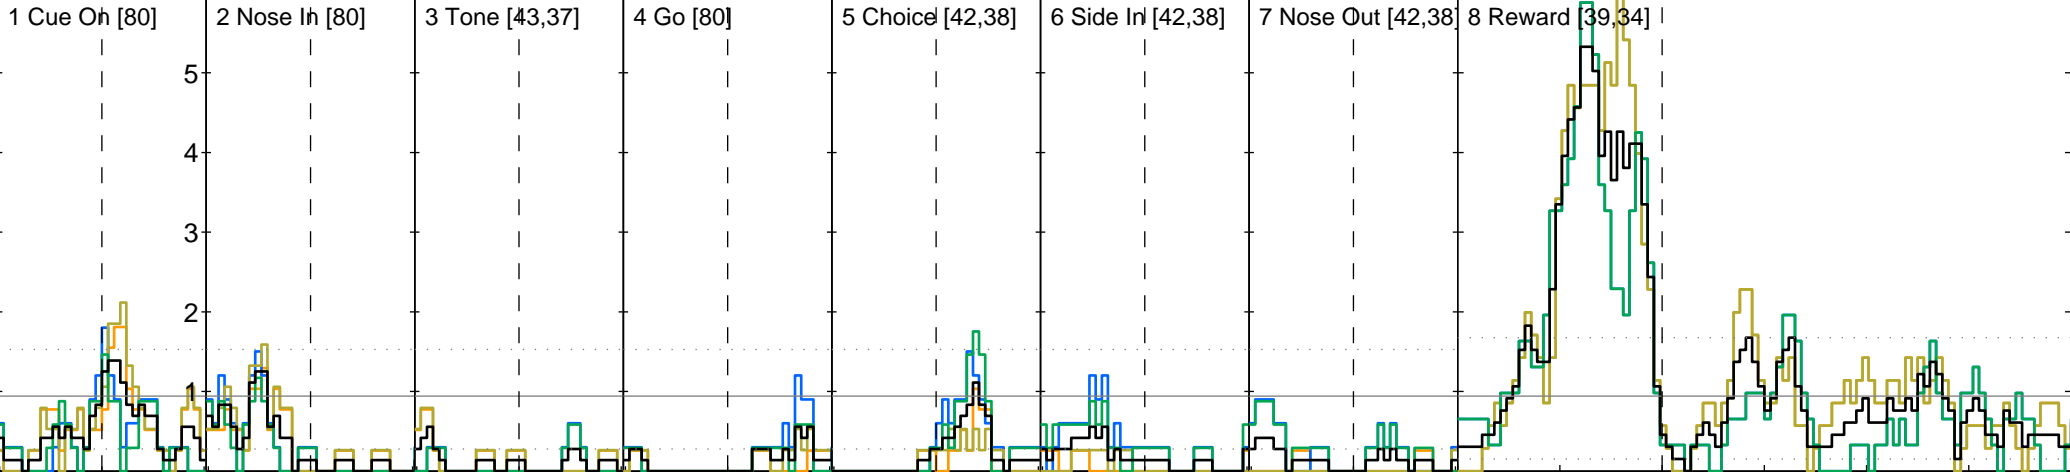

**Cell: C0420070226T02a**

AP: 3.7 ML: 2.8 DV: 3  
w: 2 n: 2722  $P_{ISI>2}$ : 0.9  
1/2pw: 210 $\mu$ s p->v: 864 $\mu$ s  
 $\beta_T$ : NaN  $\beta_D$ : NaN  
 $\beta_P$ : NaN SI: NaN  
Session FR: 0.438 Hz  
Pk Ev: 8 - Reward (T1/Con)  
Pk FR: 7.76Hz (-0.13s) **M1<sub>p</sub>**

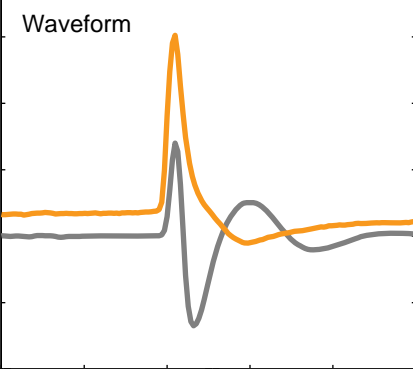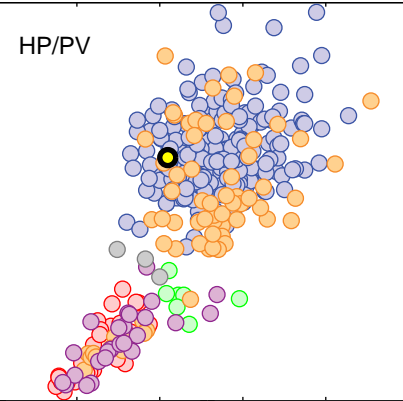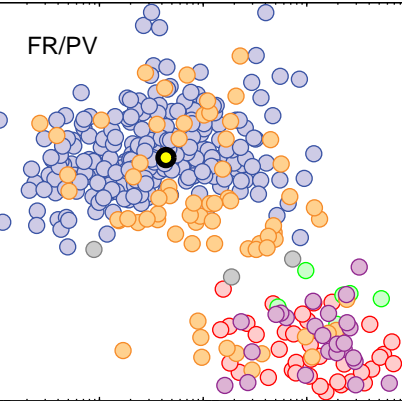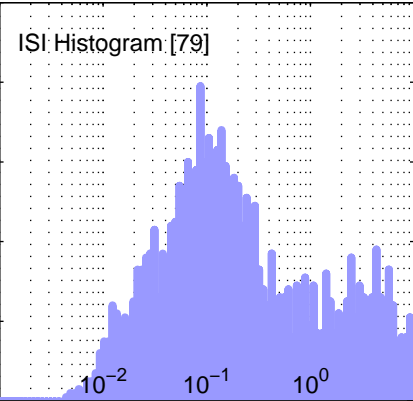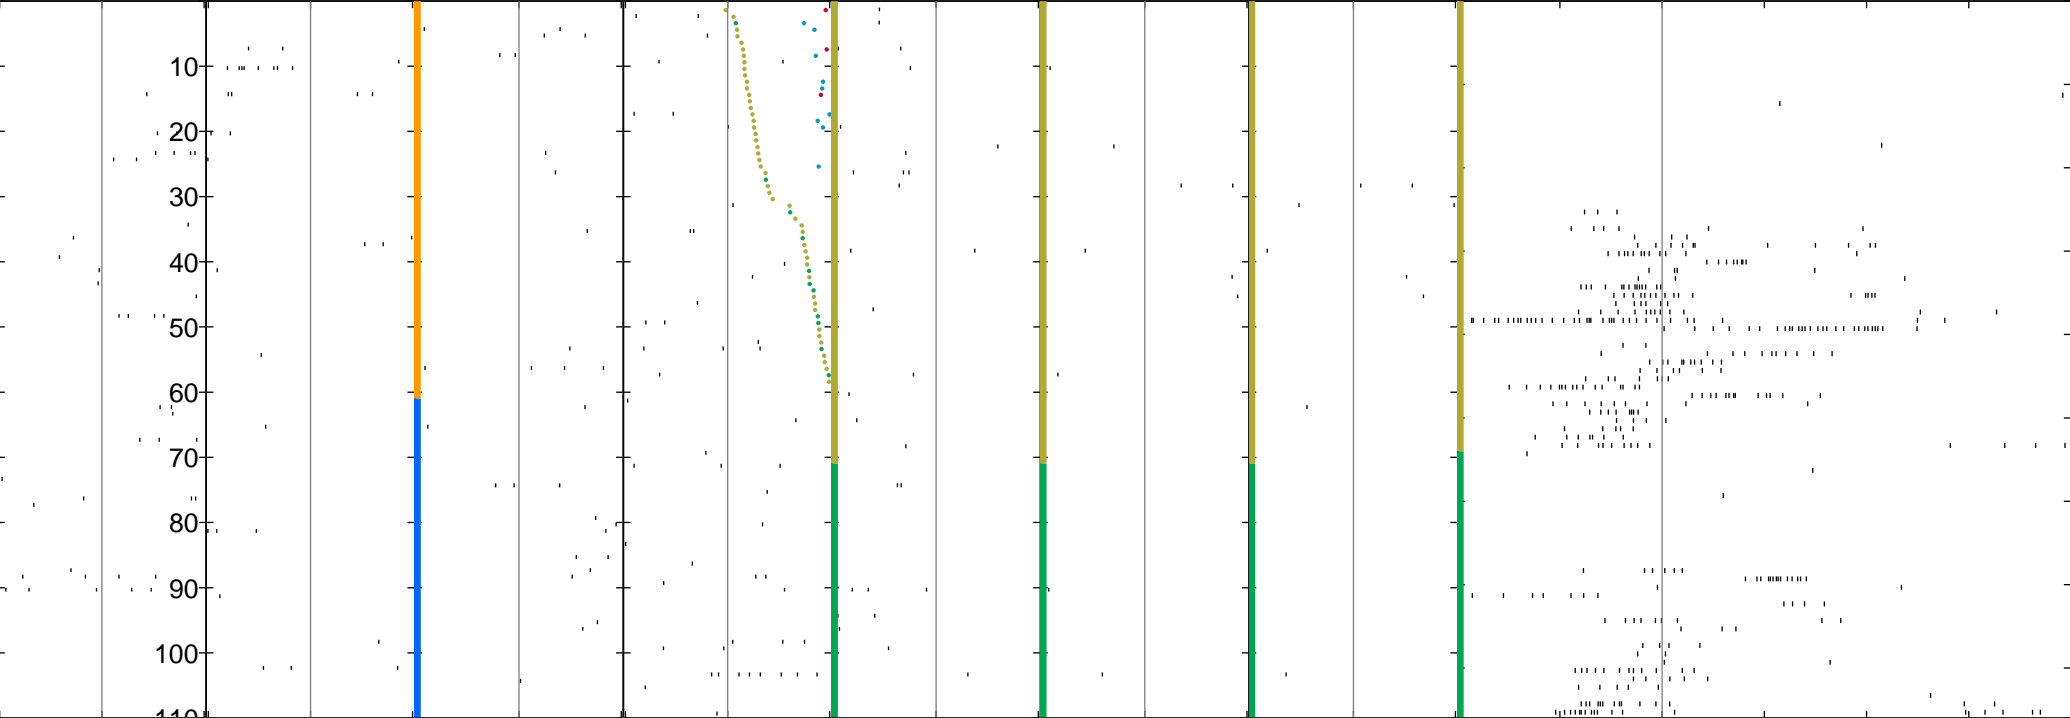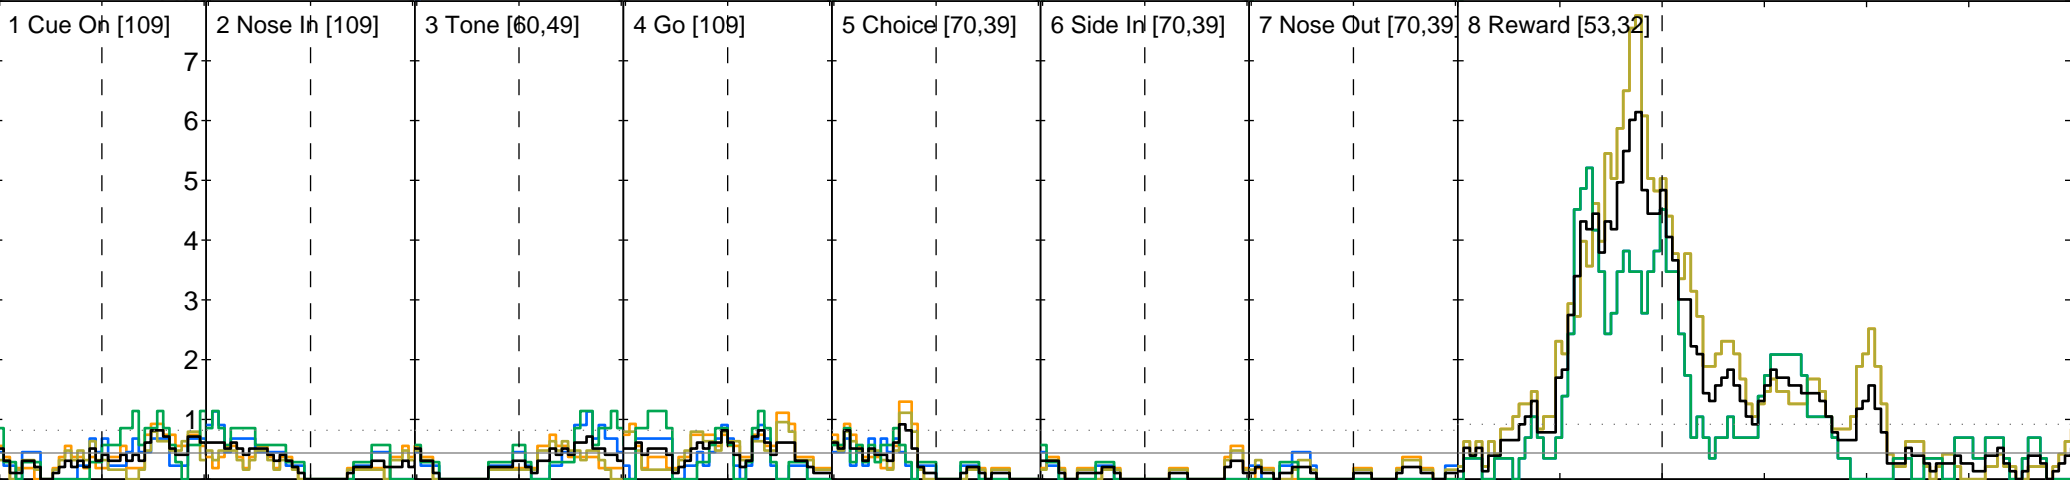

**Cell: C0420070312T02a**

AP: 3.7 ML: 2.8 DV: 3.2  
w: 2 n: 10134  $P_{ISI>2}$ : 0.36  
1/2pw: 206 $\mu$ s p $\rightarrow$ v: 1182 $\mu$ s  
 $\beta_T$ : 2.3  $\beta_D$ : 2.5  
 $\beta_P$ : 2.6 SI: 0.22  
Session FR: 2.27 Hz  
Pk Ev: 8 - Reward (T1/Con)  
Pk FR: 9.78Hz (-0.07s) **M1<sub>p</sub>**

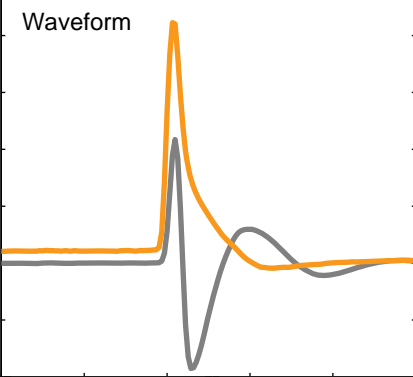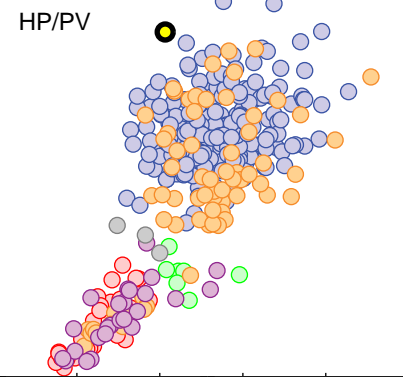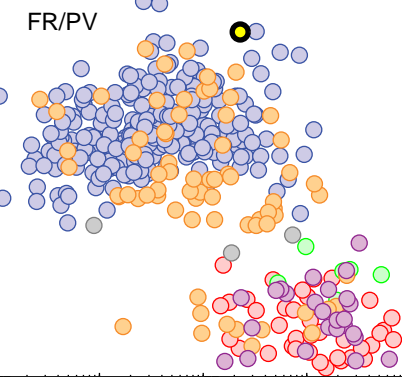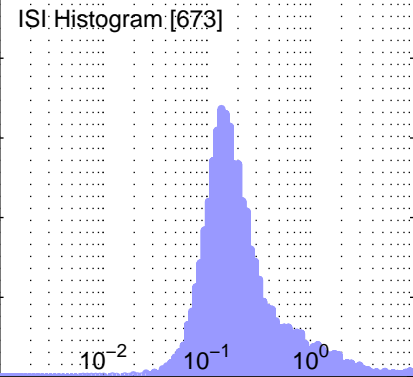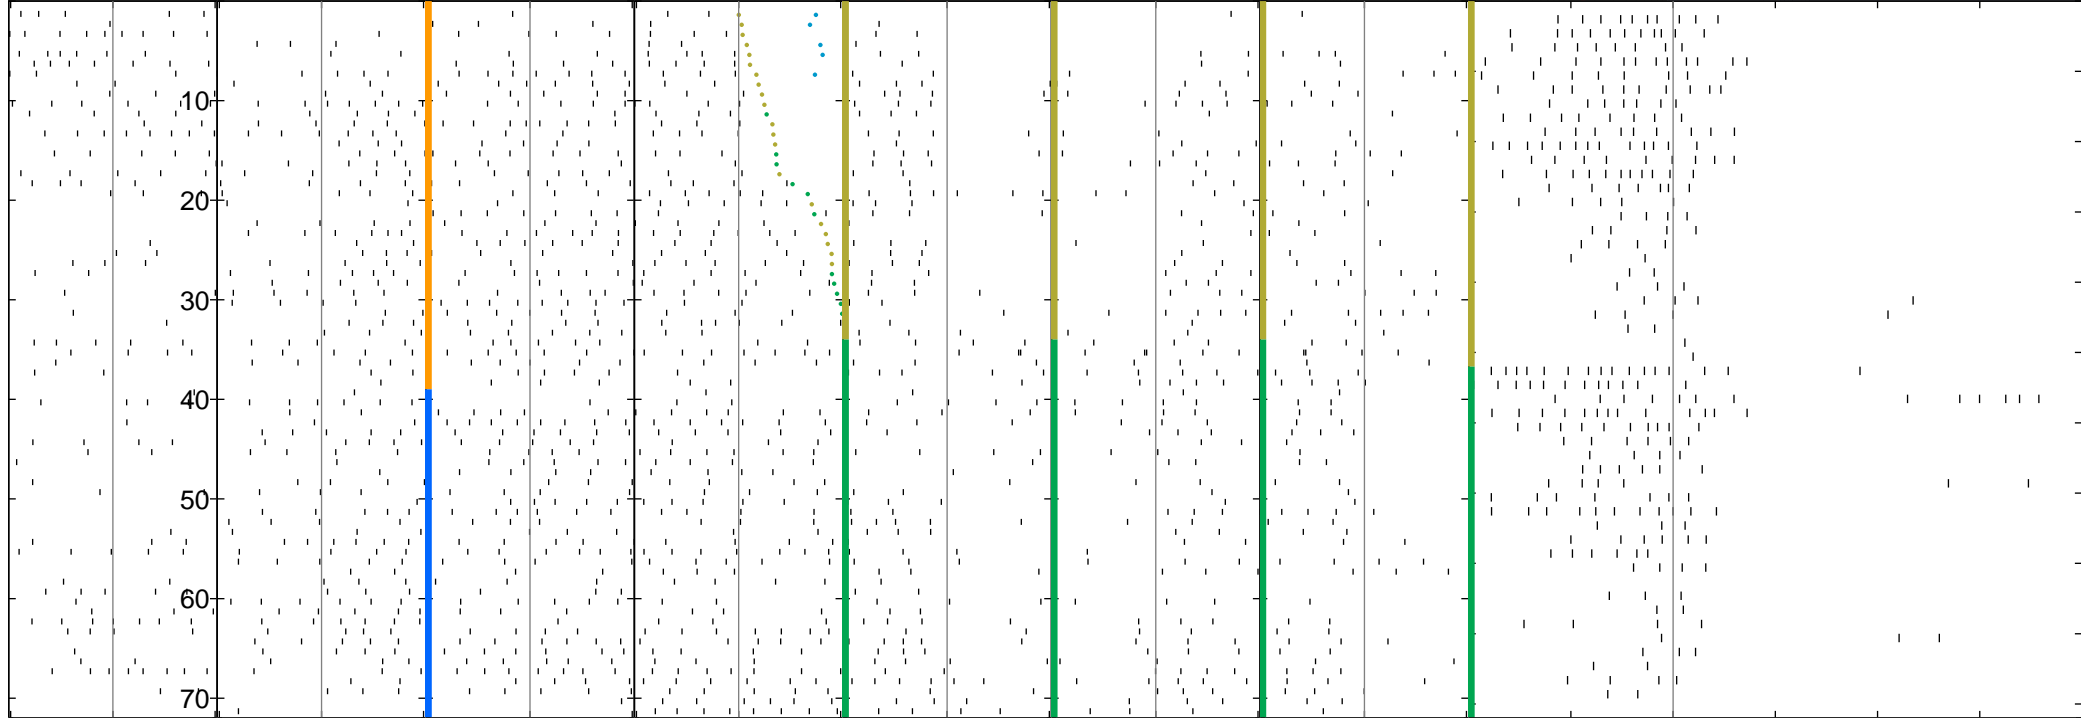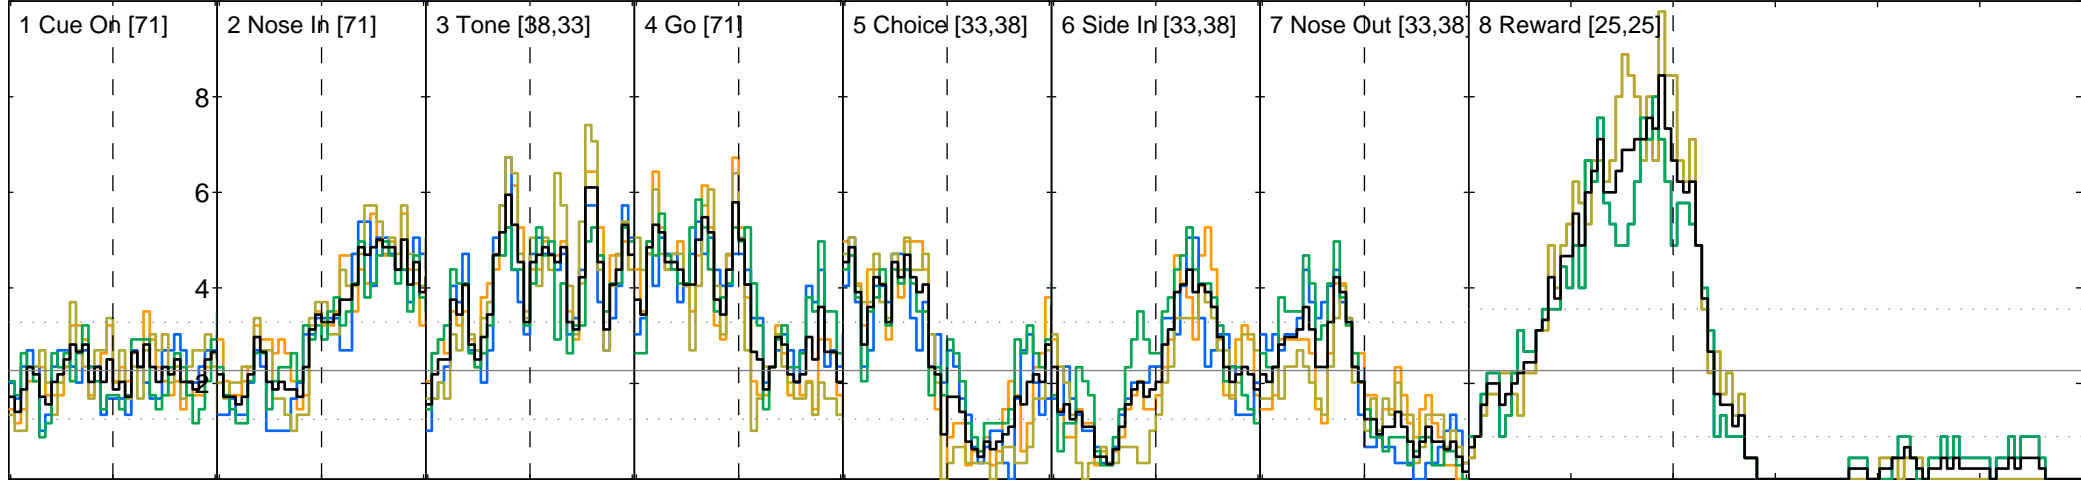

**Cell: C0420070314T02b**

AP: 3.7 ML: 2.8 DV: 3.3  
w: 1 n: 3162  $P_{ISI>2}$ : 0.89  
1/2pw: 264 $\mu$ s p $\rightarrow$ v: 1082 $\mu$ s  
 $\beta_T$ : NaN  $\beta_D$ : NaN  
 $\beta_P$ : NaN SI: NaN  
Session FR: 0.426 Hz  
Pk Ev: 8 - Reward (T2/Ipsi)  
Pk FR: 21.2Hz (-0.07s) **M1<sub>P</sub>**

Waveform

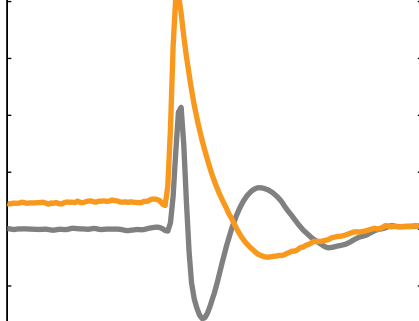

HP/PV

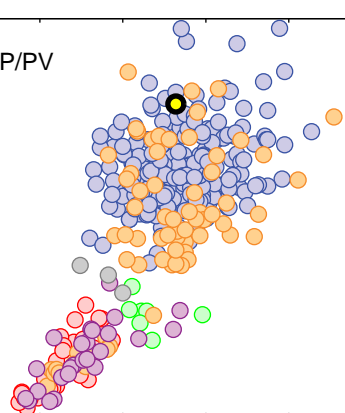

FR/PV

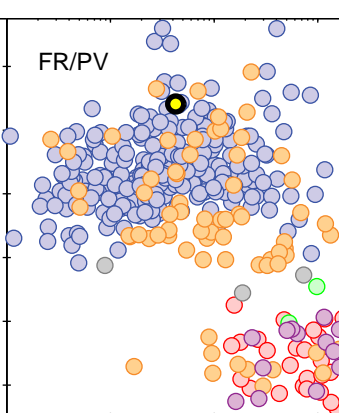

ISI Histogram [84]

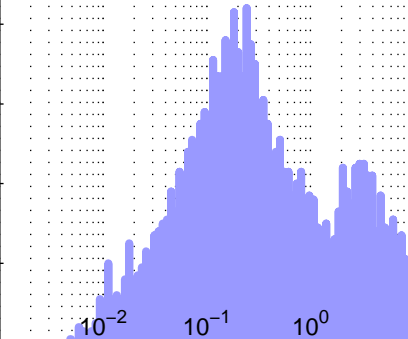

10

20

30

40

50

60

1 Cue On [61]

2 Nose In [61]

3 Tone [33,28]

4 Go [61]

5 Choice [38,23]

6 Side In [38,23]

7 Nose Out [38,23]

8 Reward [15,11]

25

15

10

5

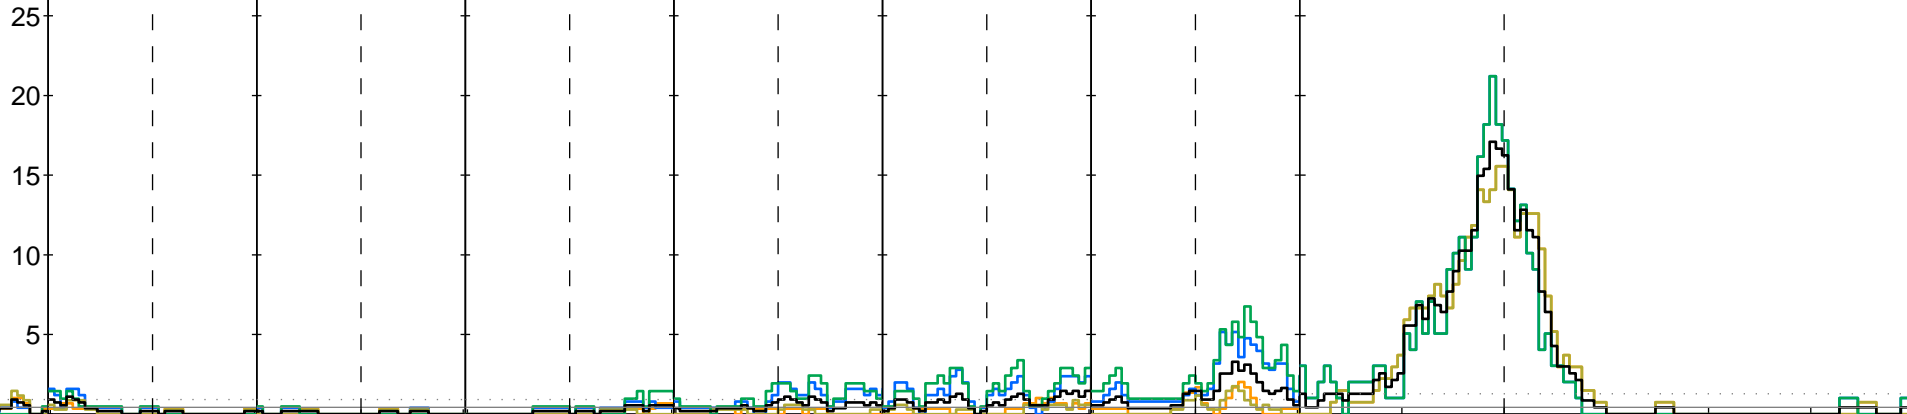



**Cell: C0420070314T02h**

AP: 3.7 ML: 2.8 DV: 3.3  
w: 2 n: 2060  $P_{ISI>2}$ : 0.91  
1/2pw: 315 $\mu$ s p->v: 1130 $\mu$ s  
 $\beta_T$ : NaN  $\beta_D$ : NaN  
 $\beta_P$ : NaN SI: NaN  
Session FR: 0.278 Hz  
Pk Ev: 8 - Reward (T1/Con)  
Pk FR: 7.41Hz (-0.04s) **M1<sub>p</sub>**

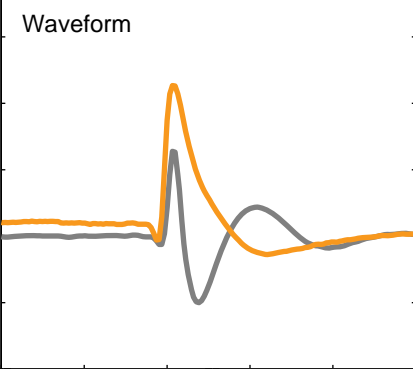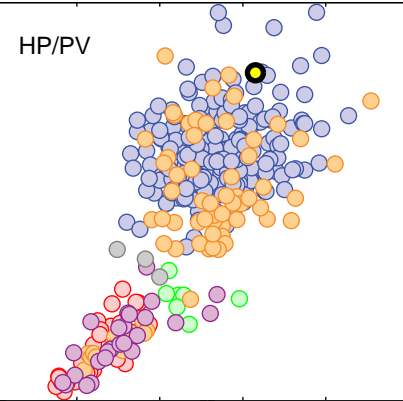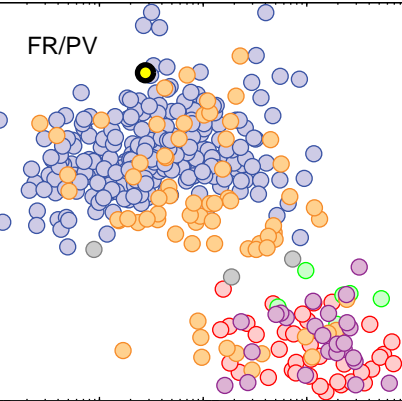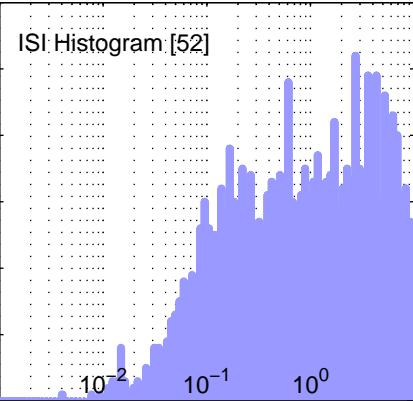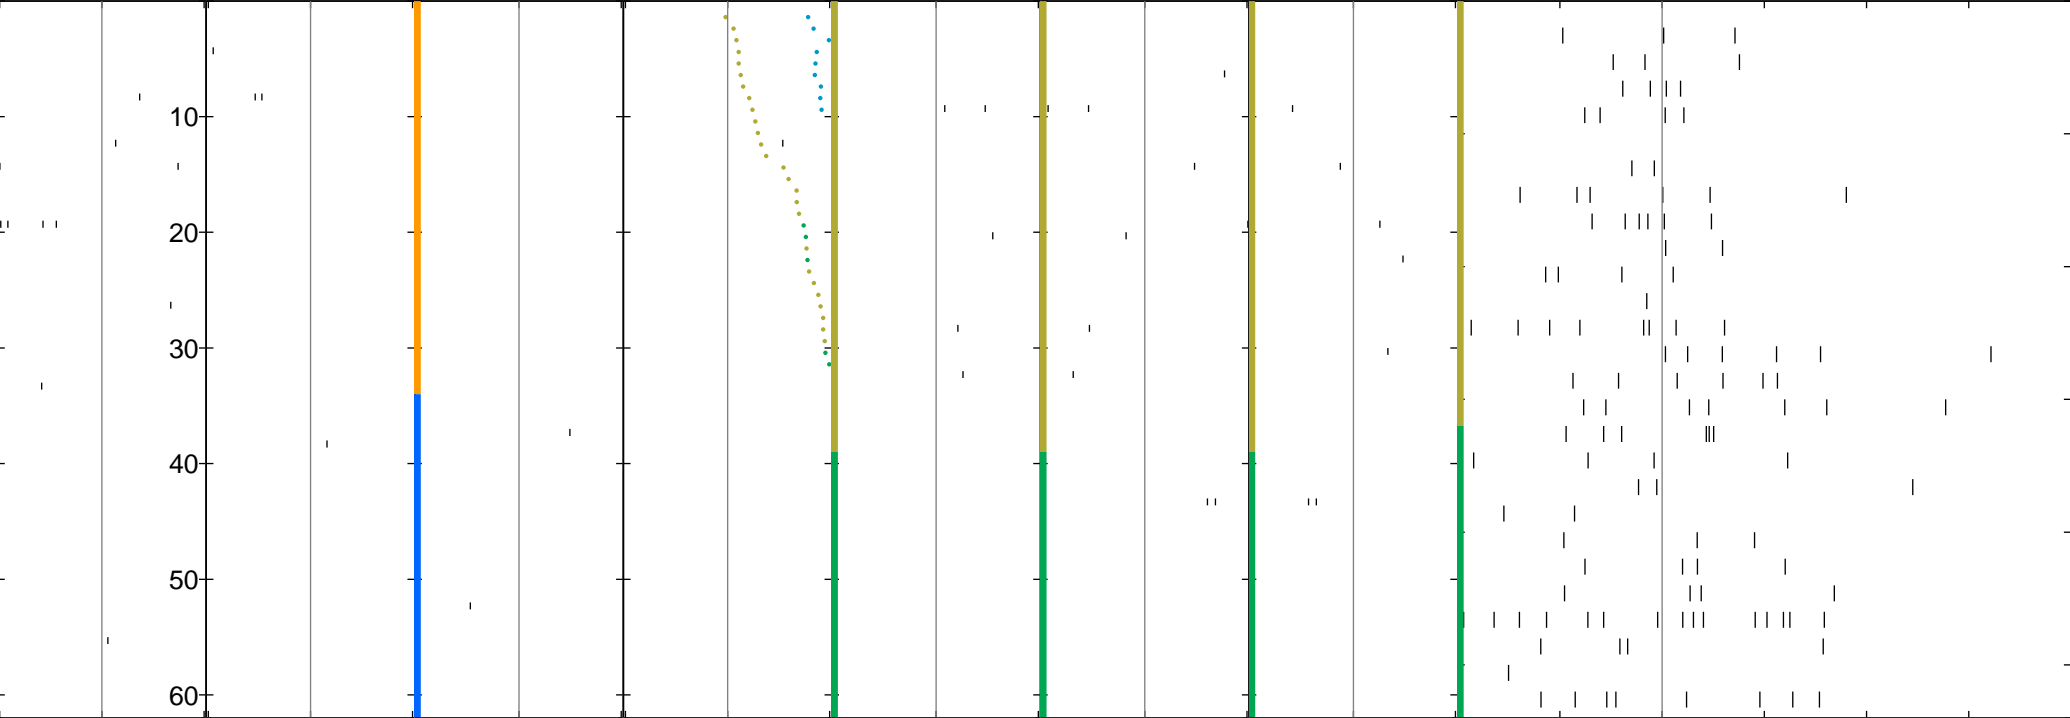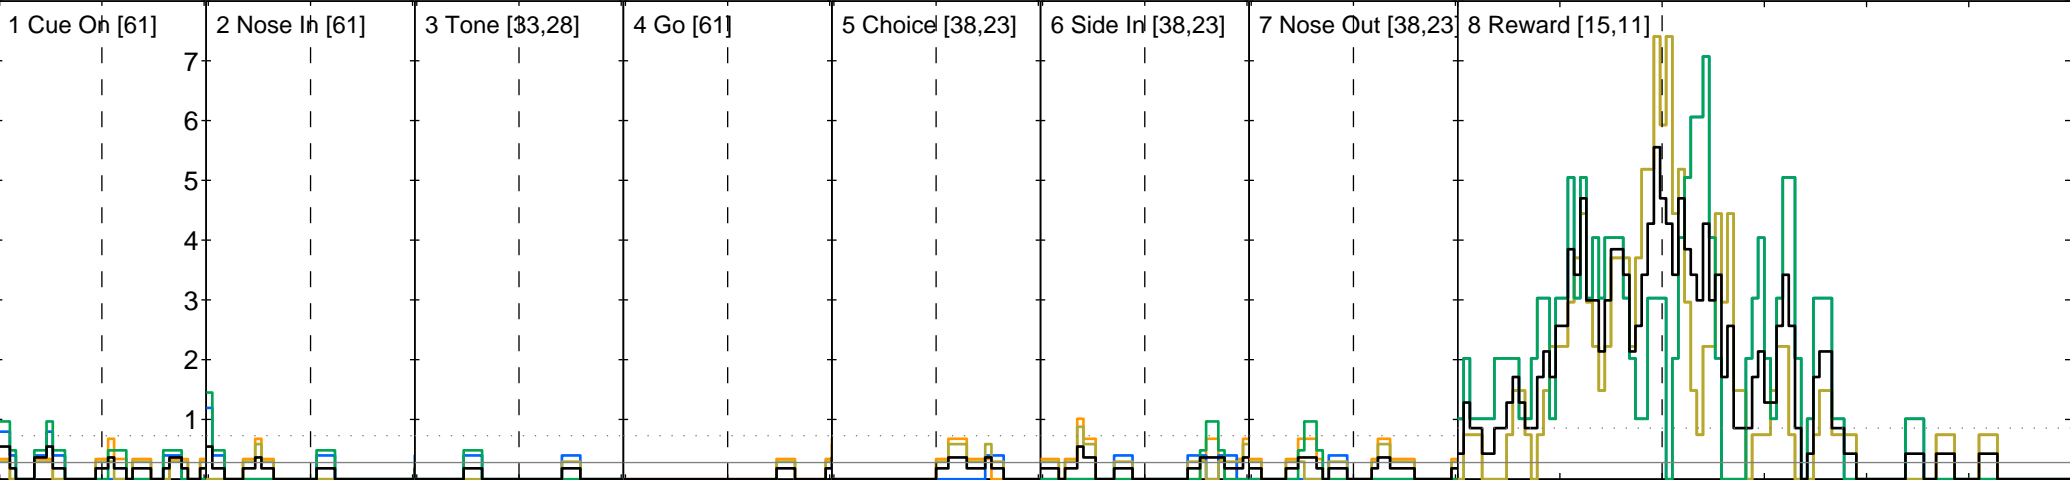

**Cell: C1220071028T03e**

AP: 3.2 ML: 2.6 DV: 2.3

w: 4 n: 11054  $P_{ISI>2}$ : 0.3

1/2pw: 251 $\mu$ s p->v: 728 $\mu$ s

$\beta_T$ : -0.51  $\beta_D$ : 0.72

$\beta_P$ : -0.72 SI: NaN

Session FR: 1.84 Hz

Pk Ev: 8 - Reward (T1/Con)

Pk FR: 9.97Hz (-0.01s) **M1<sub>p</sub>**

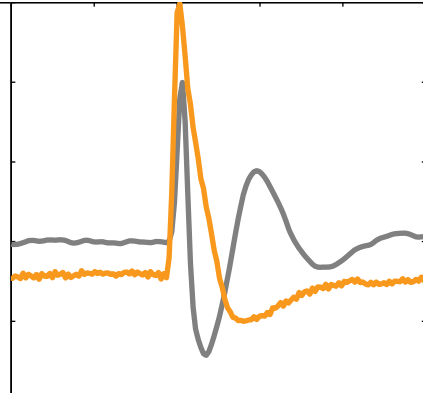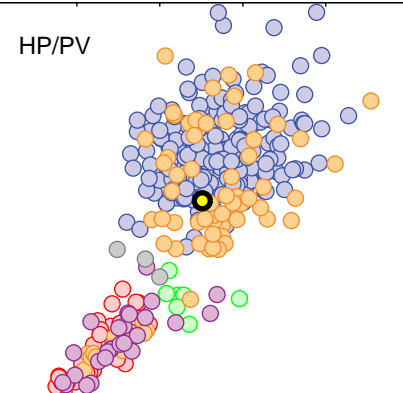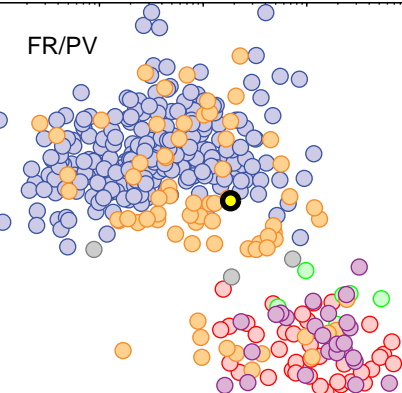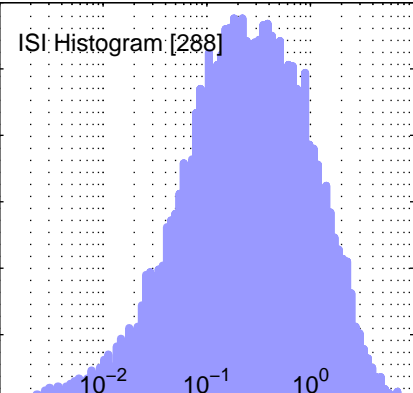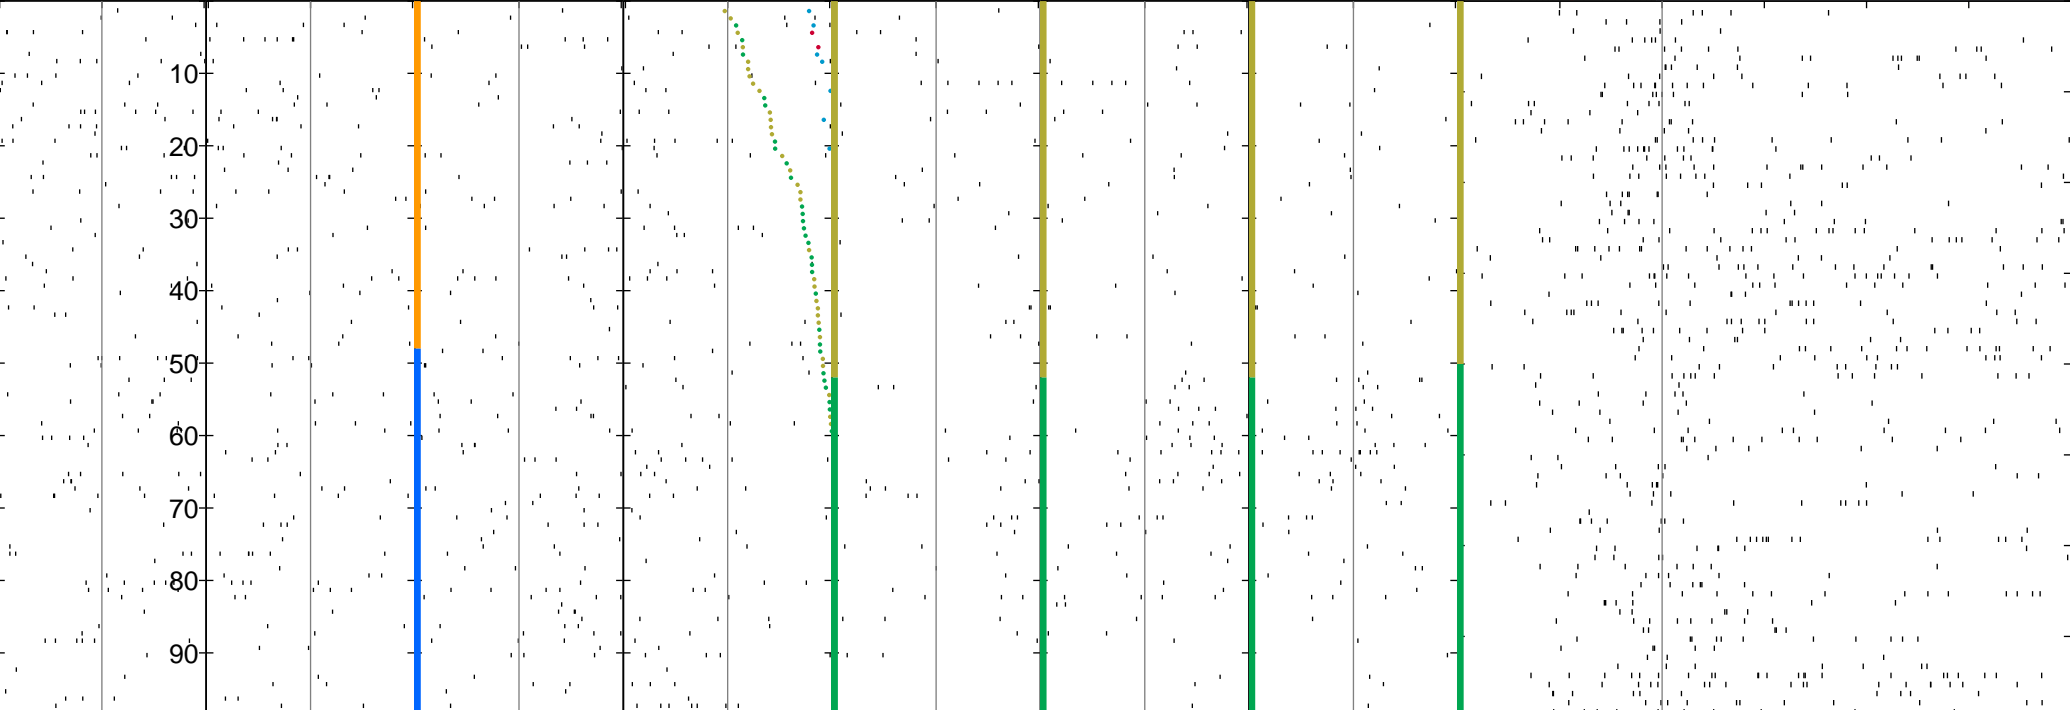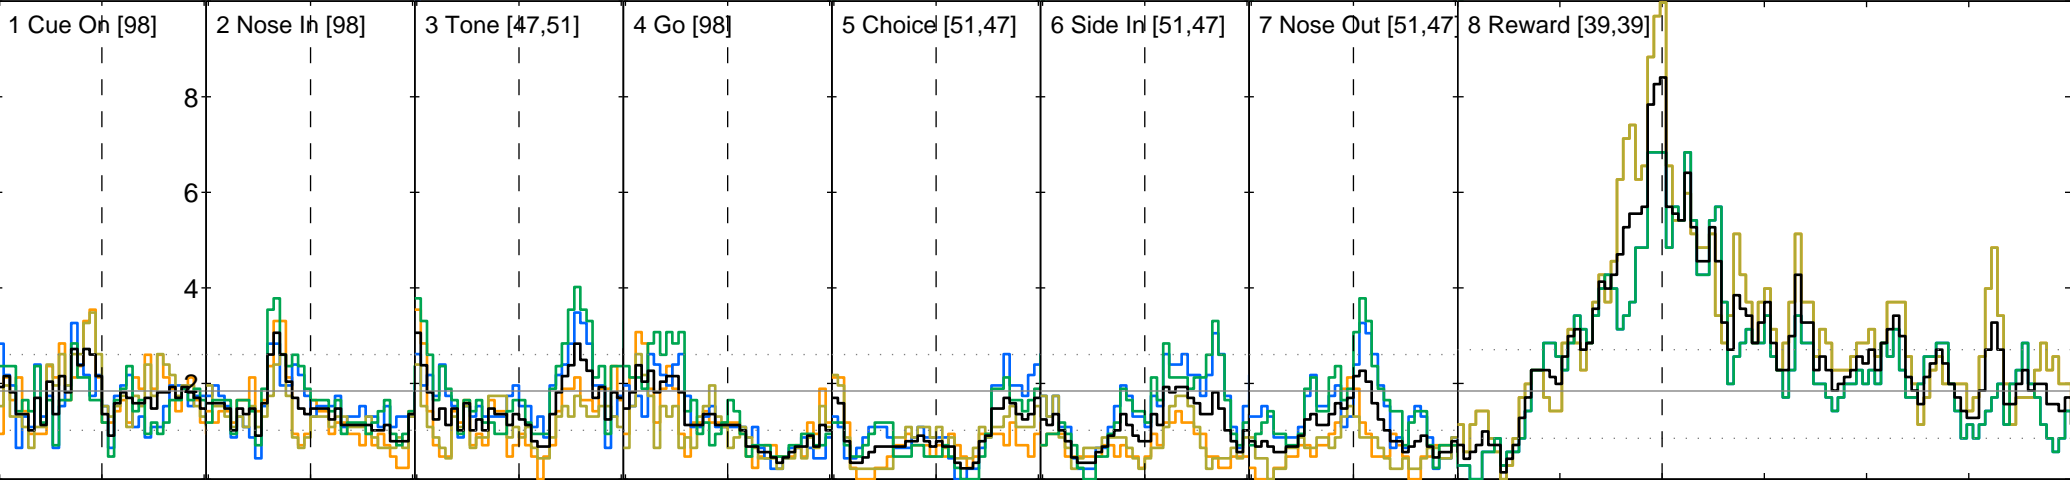

Cell: C1220071115T03e

AP: 3.2 ML: 2.6 DV: 2.5

w: 3 n: 9113  $P_{ISI>2}$ : 0.57

1/2pw: 278 $\mu$ s p $\rightarrow$ v: 594 $\mu$ s

$\beta_T$ : -2.3  $\beta_D$ : 1.8

$\beta_P$ : -3.4 SI: 0.74

Session FR: 1.29 Hz

Pk Ev: 8 - Reward (T2/Ipsi)

Pk FR: 10.6Hz (-0.01s) **M1<sub>p</sub>**

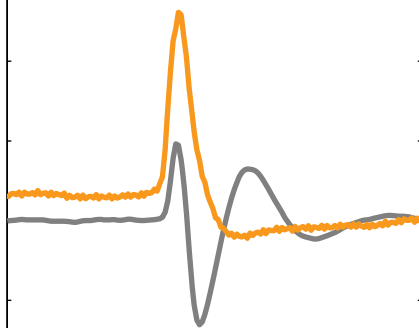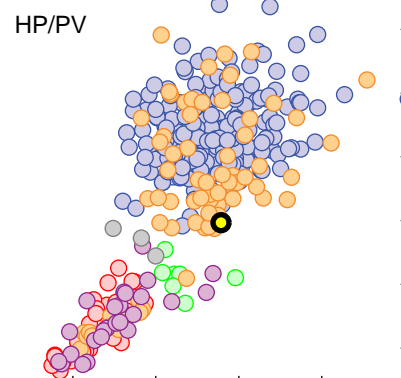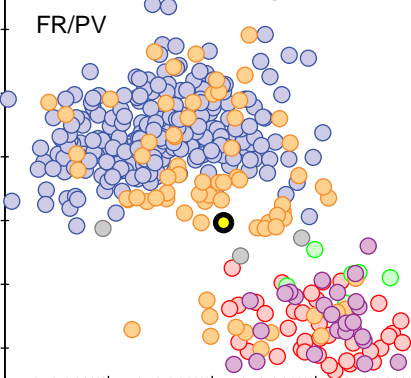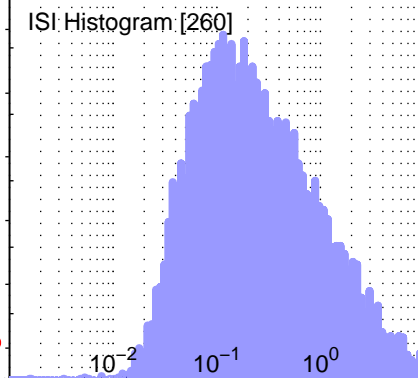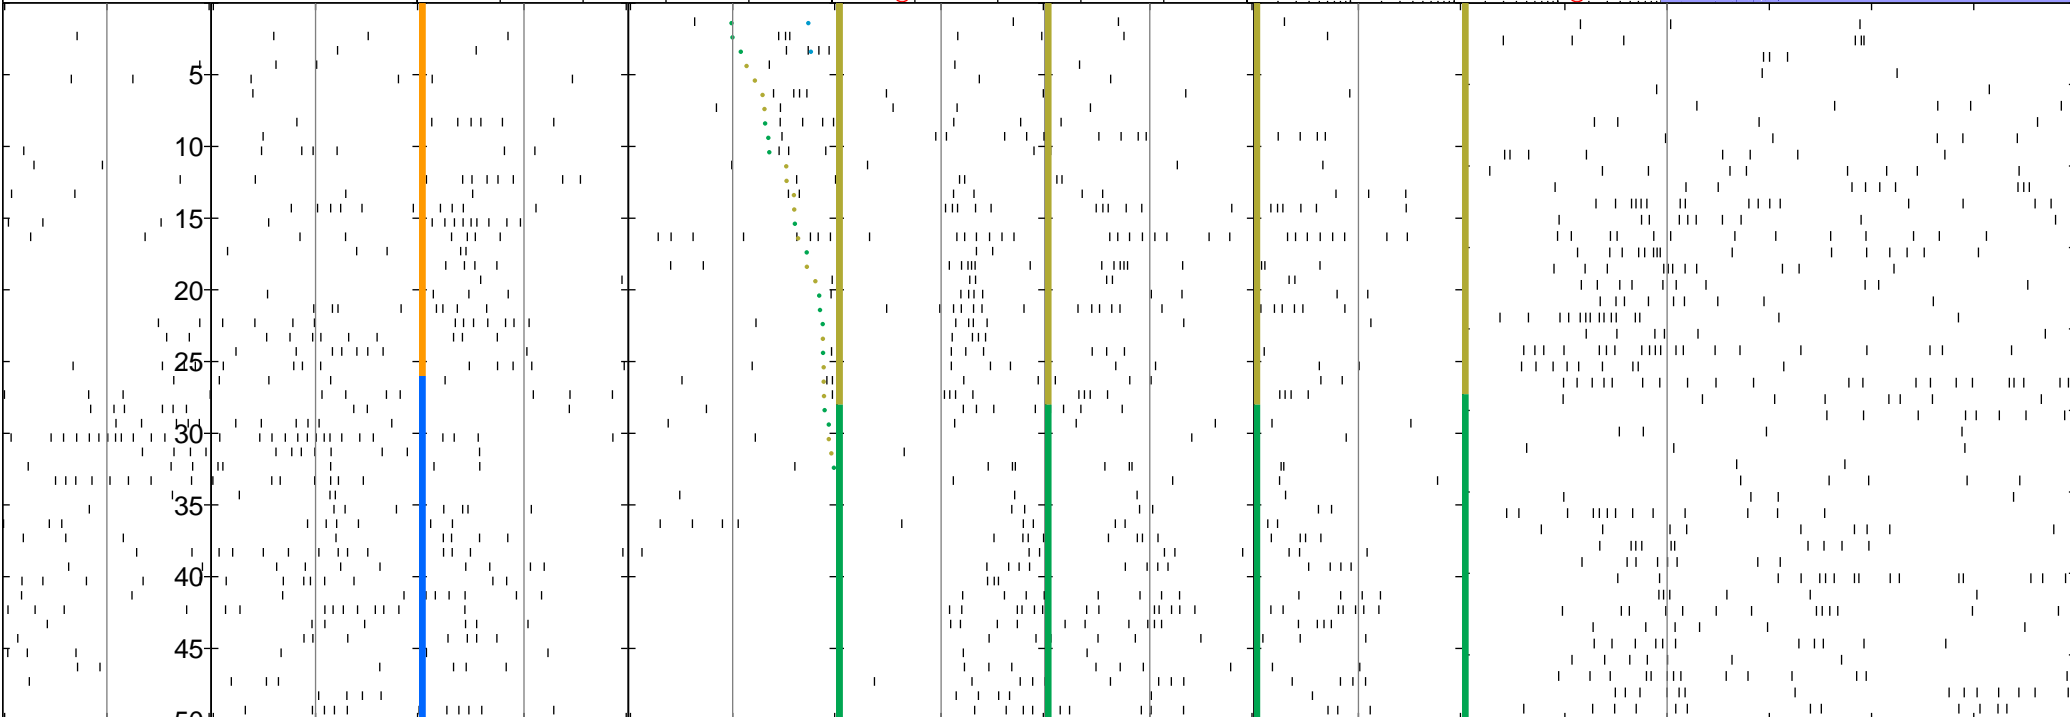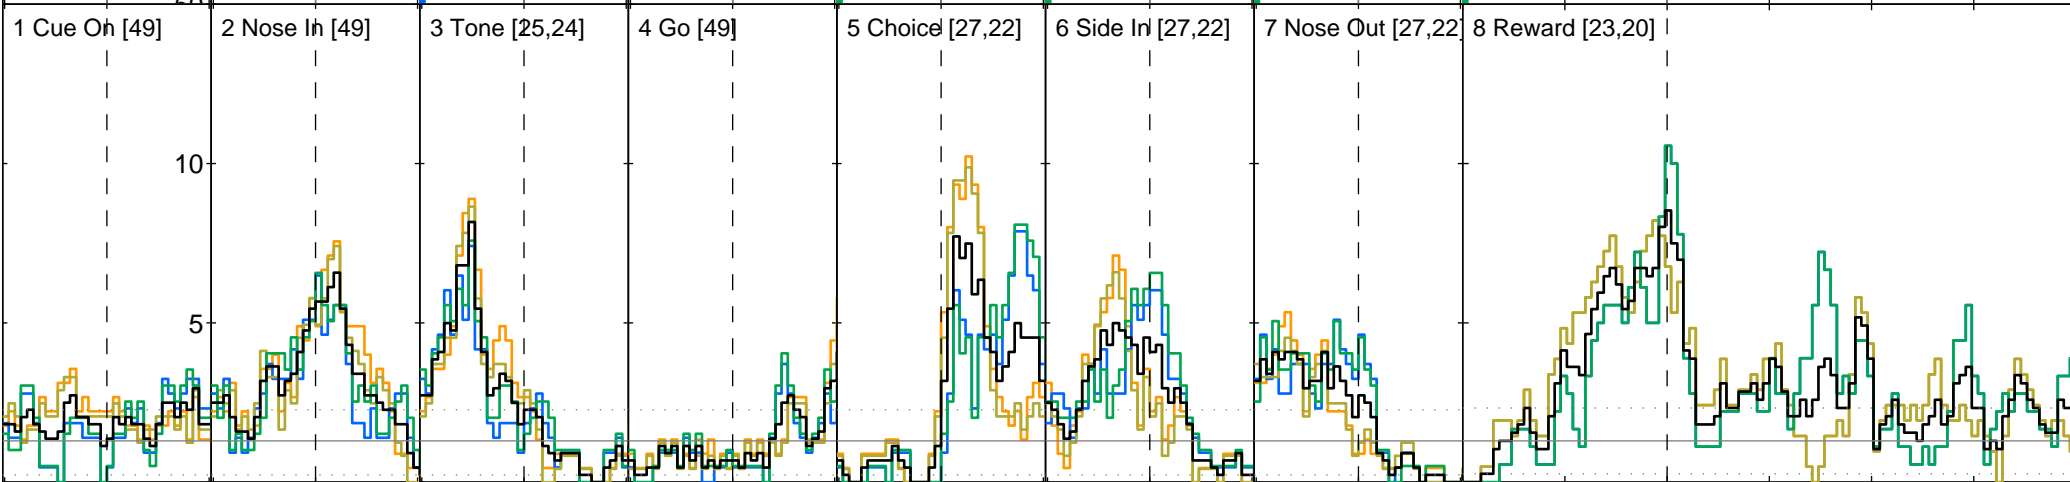

Cell: C1220071024T02a

AP: 3.7 ML: 3.5 DV: 1.7

w: 1 n: 24474  $P_{ISI>2}$ : 0.011

1/2pw: 322 $\mu$ s p->v: 706 $\mu$ s

$\beta_T$ : -2.7  $\beta_D$ : 4

$\beta_P$ : 4.8 SI: 0.42

Session FR: 11.8 Hz

Pk Ev: 8 - Reward (T2/Ipsi)

Pk FR: 22.8Hz (0.05s) M1<sub>p</sub>

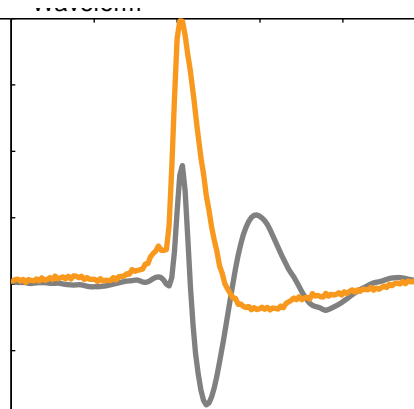

HP/PV

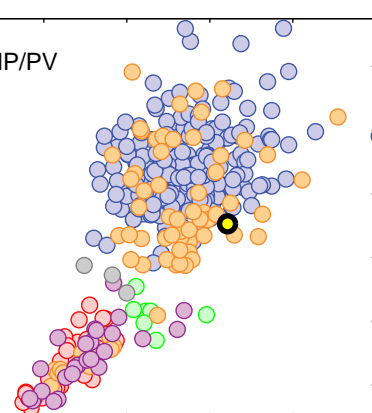

FR/PV

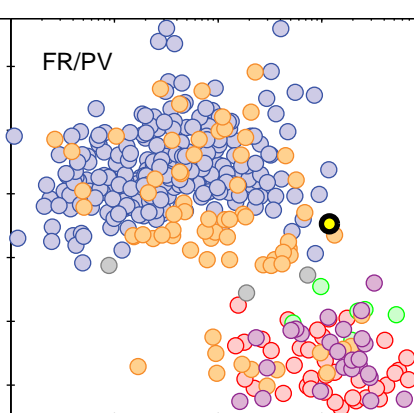

ISI Histogram [930]

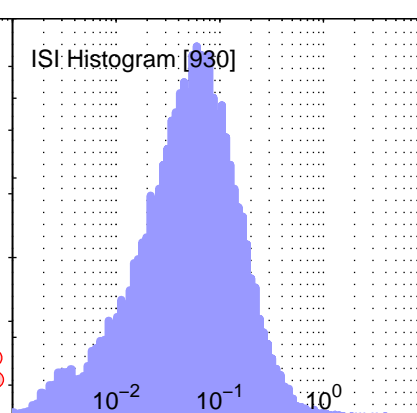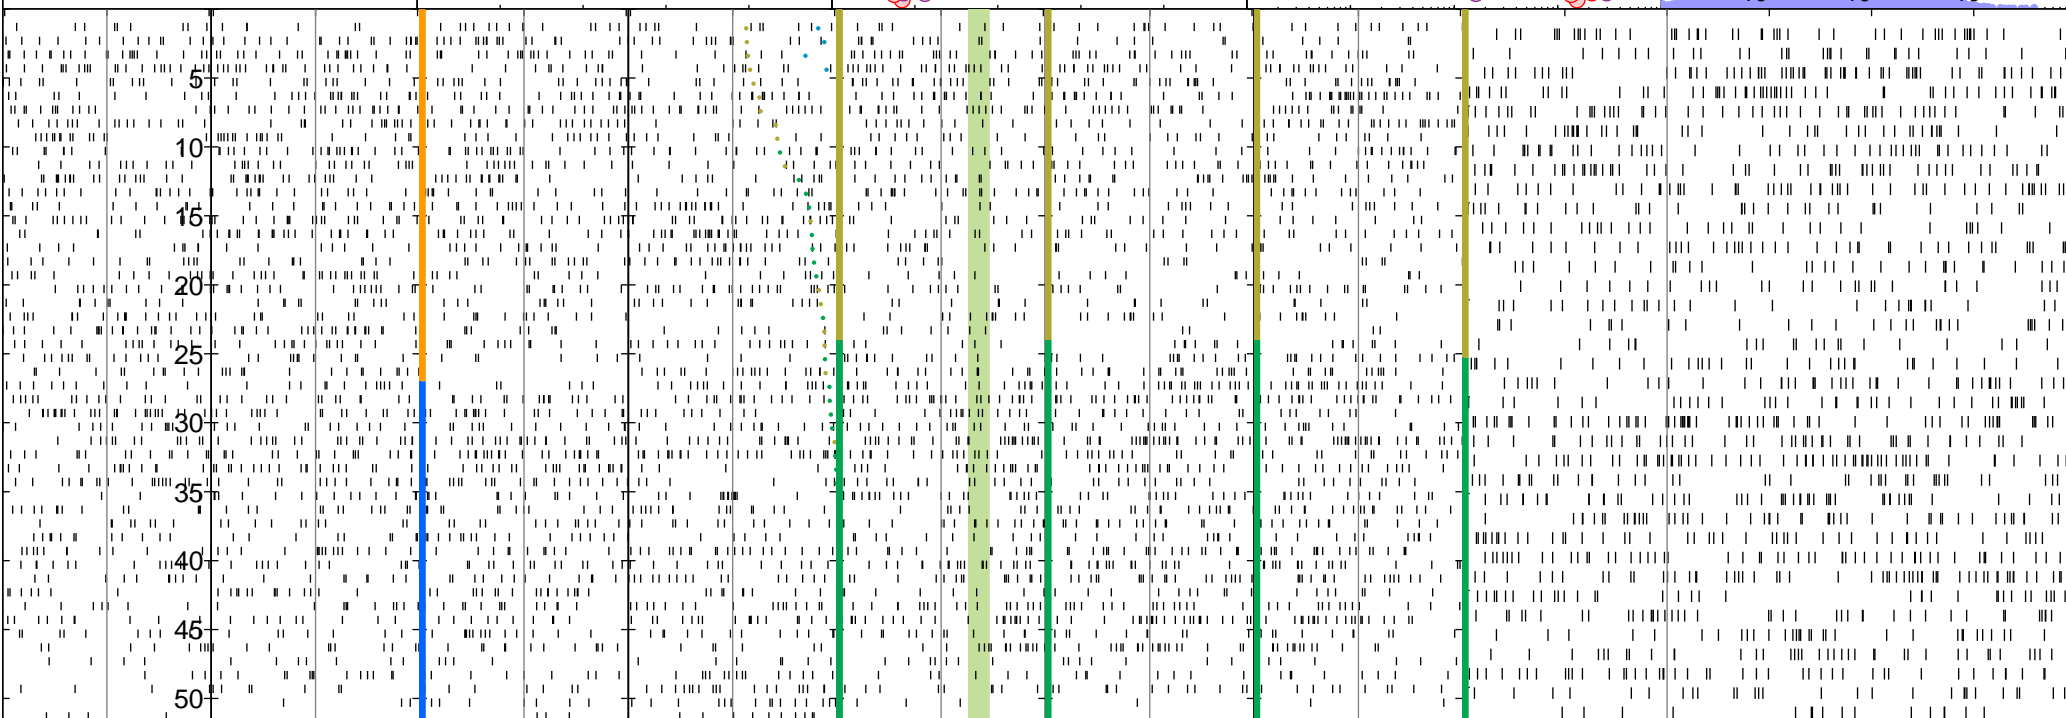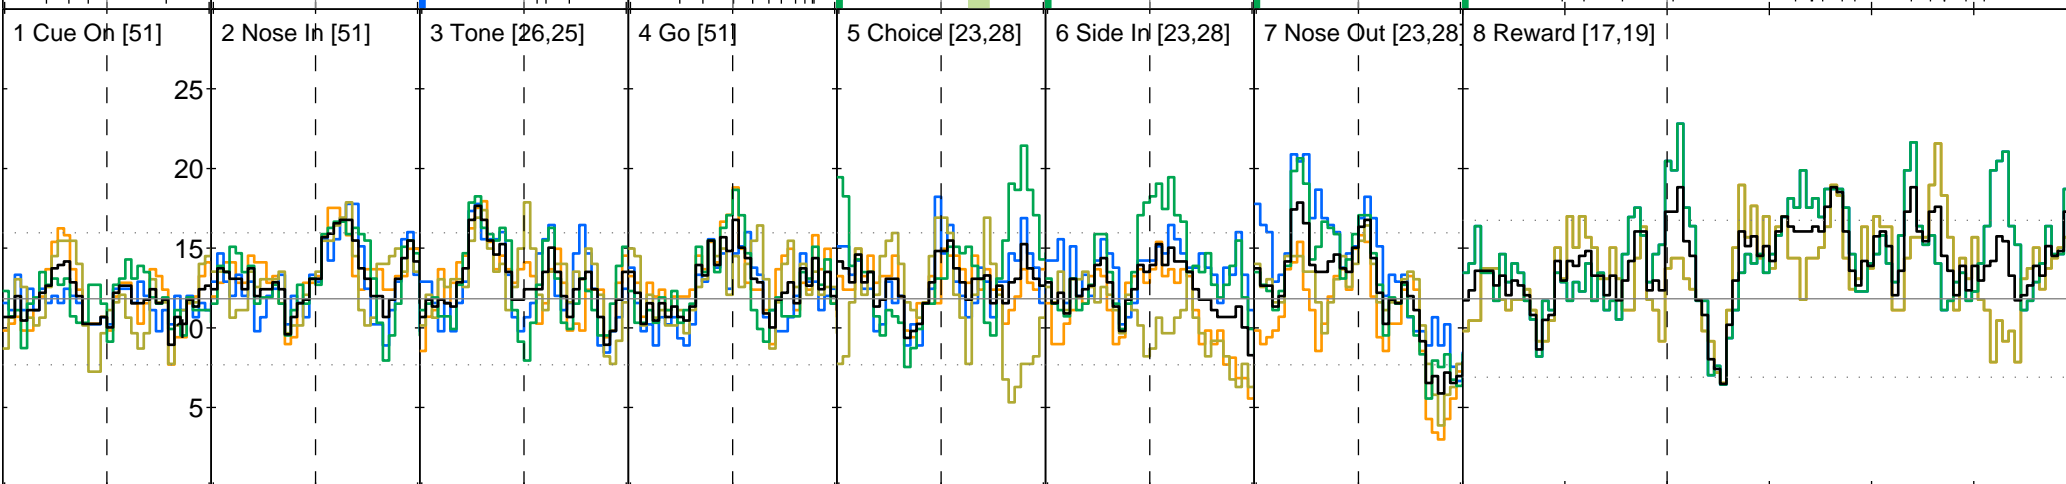

Cell: C1220071027T03c

AP: 3.2 ML: 2.6 DV: 2.2

w: 3 n: 19475  $P_{ISI>2}$ : 0.3

1/2pw: 270 $\mu$ s p $\rightarrow$ v: 576 $\mu$ s

$\beta_T$ : NaN  $\beta_D$ : NaN

$\beta_P$ : NaN SI: NaN

Session FR: 3.25 Hz

Pk Ev: 8 - Reward (T1/Con)

Pk FR: 15Hz (0.05s) **M1<sub>p</sub>**

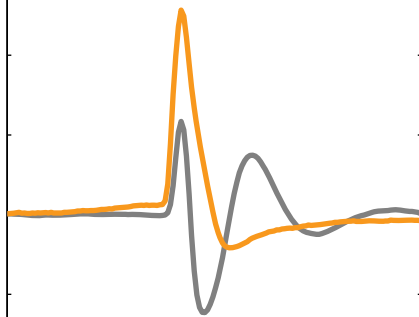

HP/PV

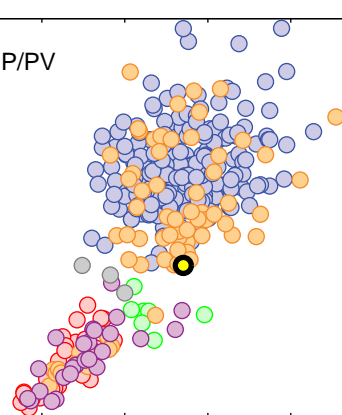

FR/PV

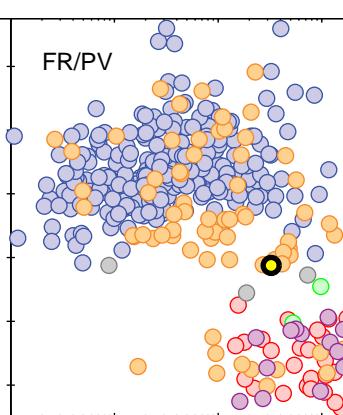

ISI Histogram [738]

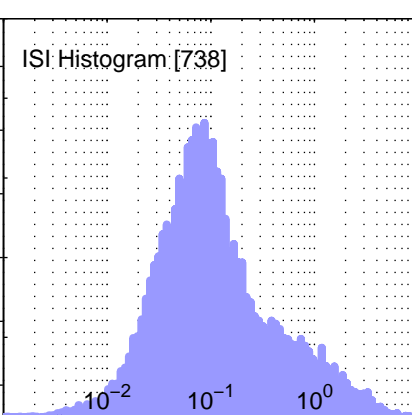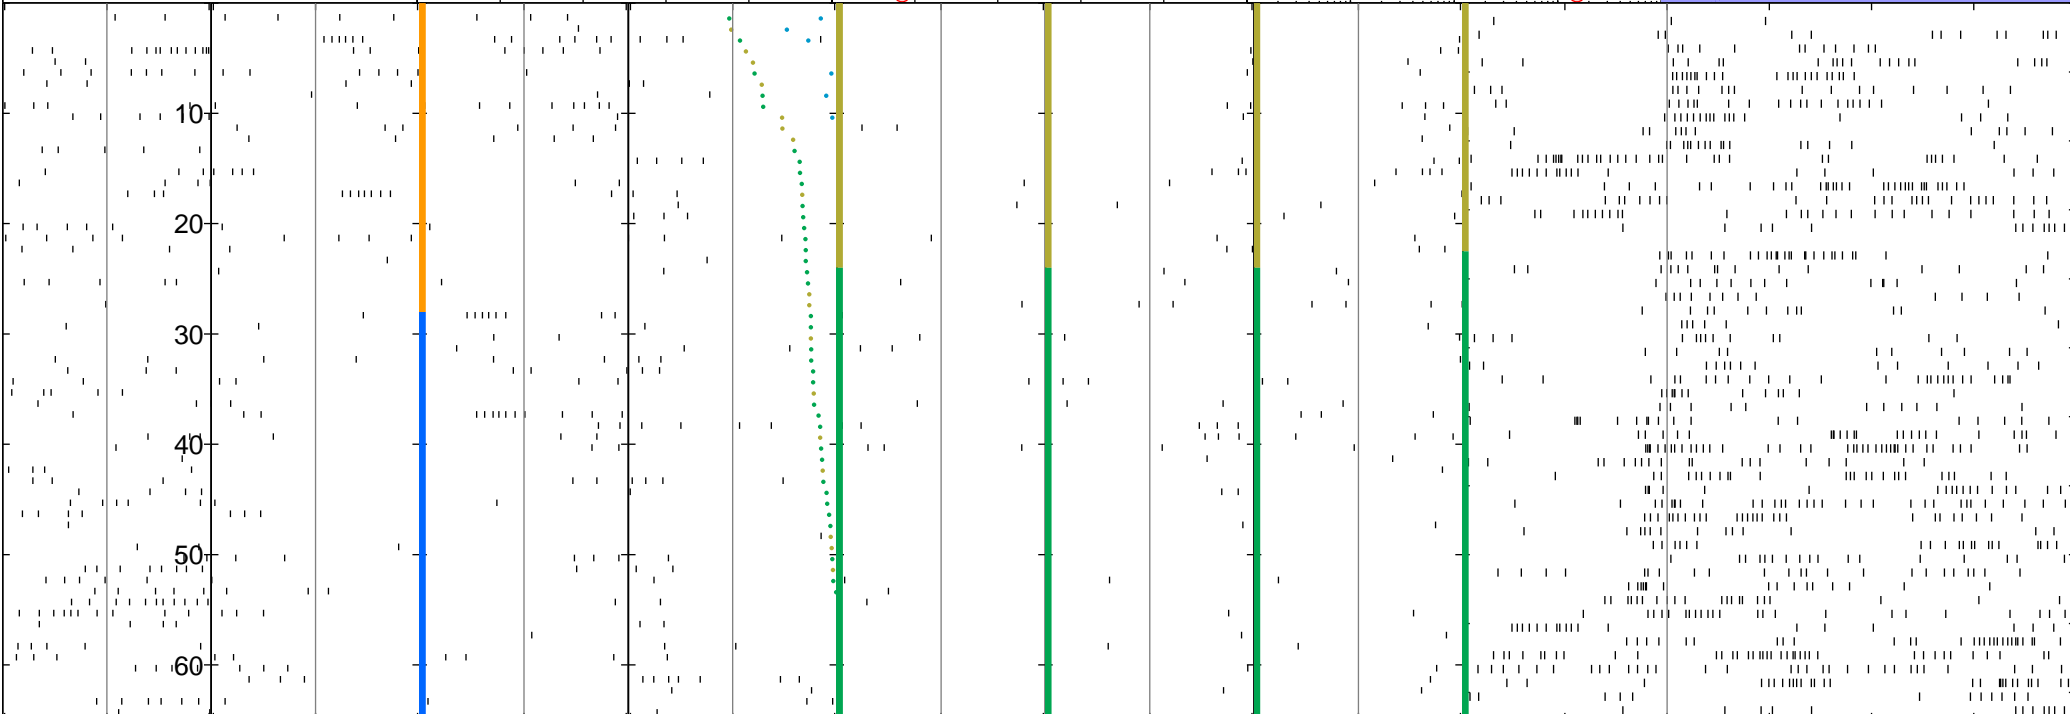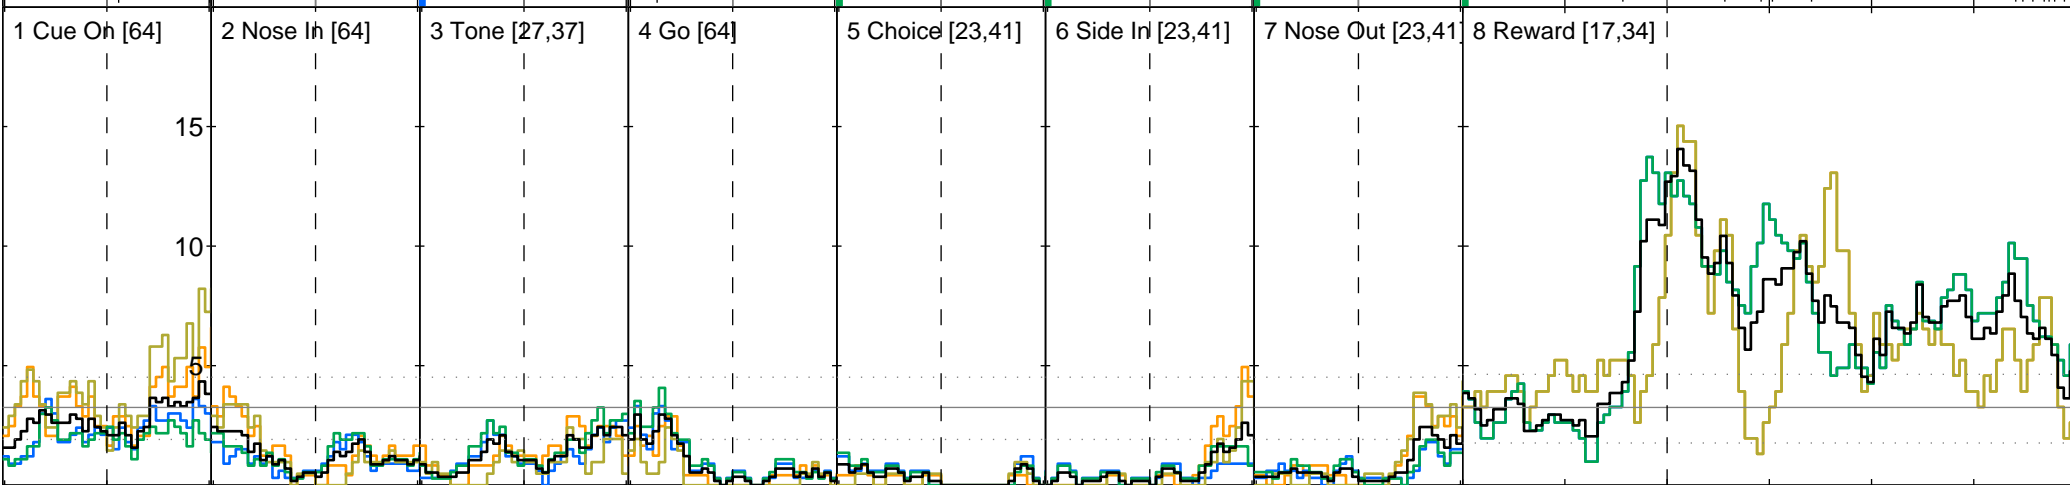

**Cell: C1220071117T03b**

AP: 3.2 ML: 2.6 DV: 2.6

w: 1 n: 12577  $P_{ISI>2}$ : 0.66

1/2pw: 266 $\mu$ s p->v: 664 $\mu$ s

$\beta_T$ : NaN  $\beta_D$ : NaN

$\beta_P$ : NaN SI: NaN

Session FR: 1.23 Hz

Pk Ev: 8 - Reward (T1/Con)

Pk FR: 9.17Hz (0.08s) **M1<sub>p</sub>**

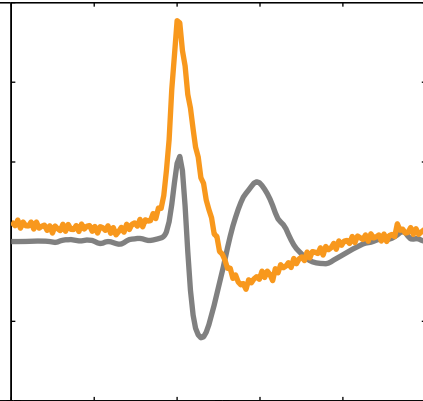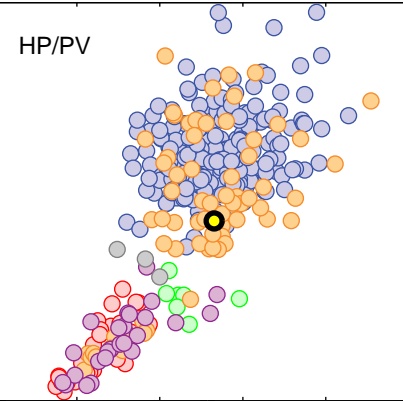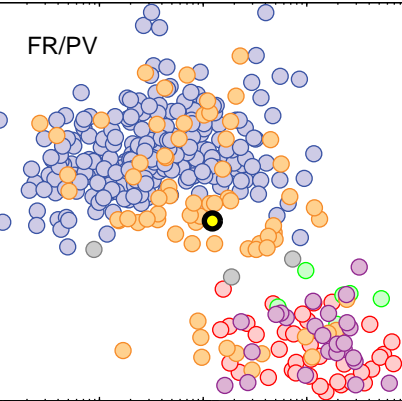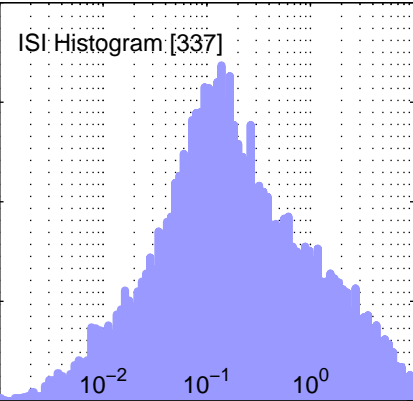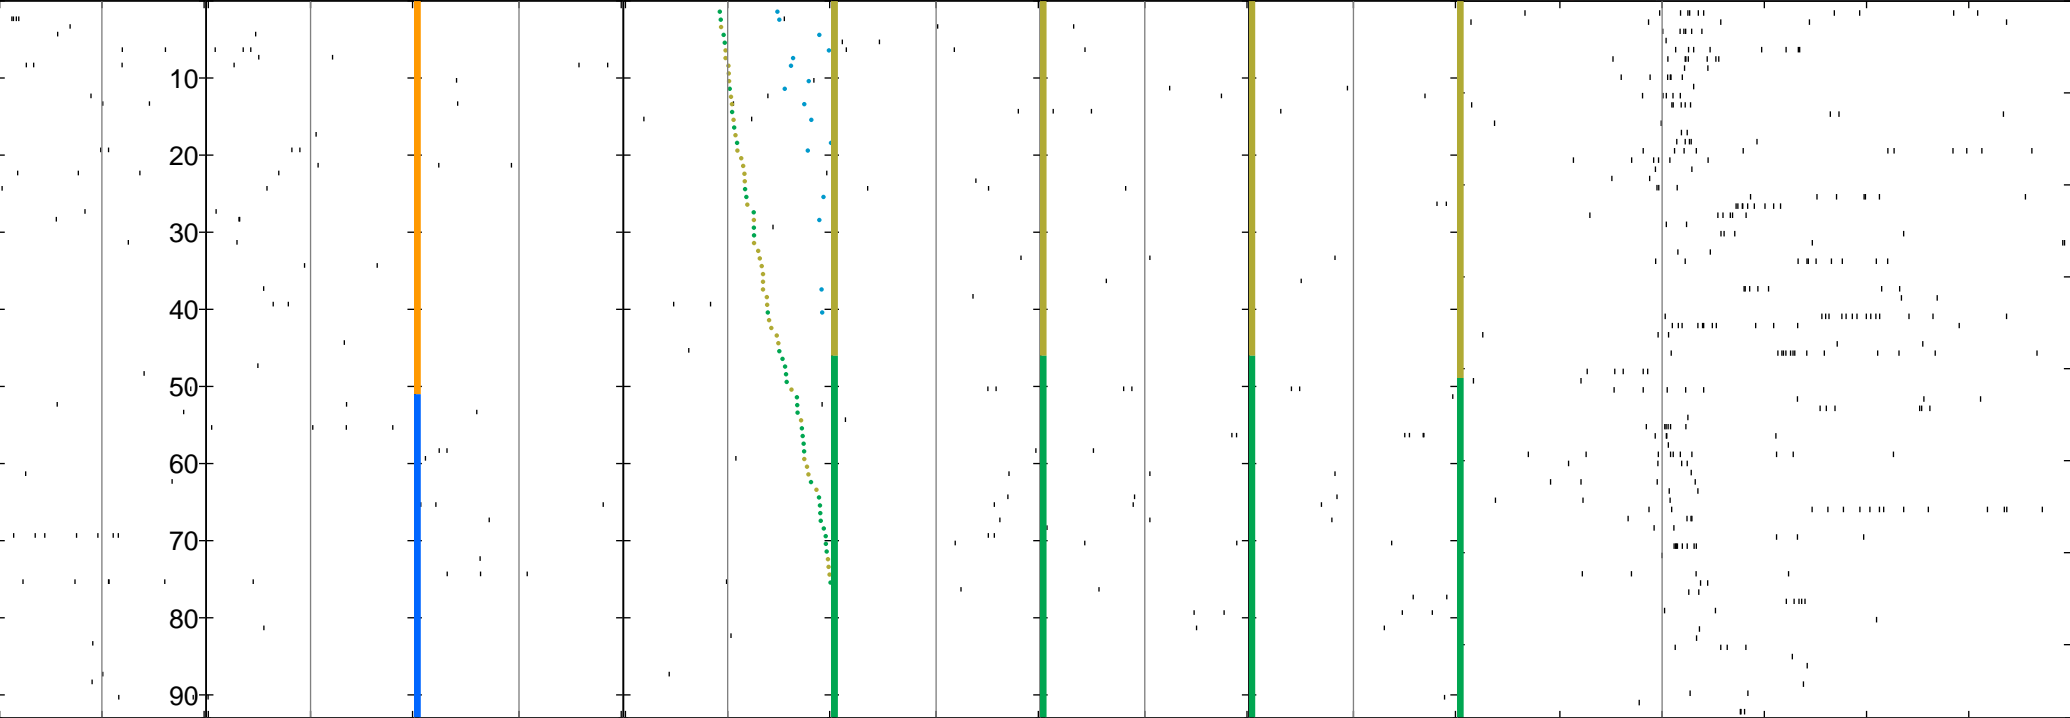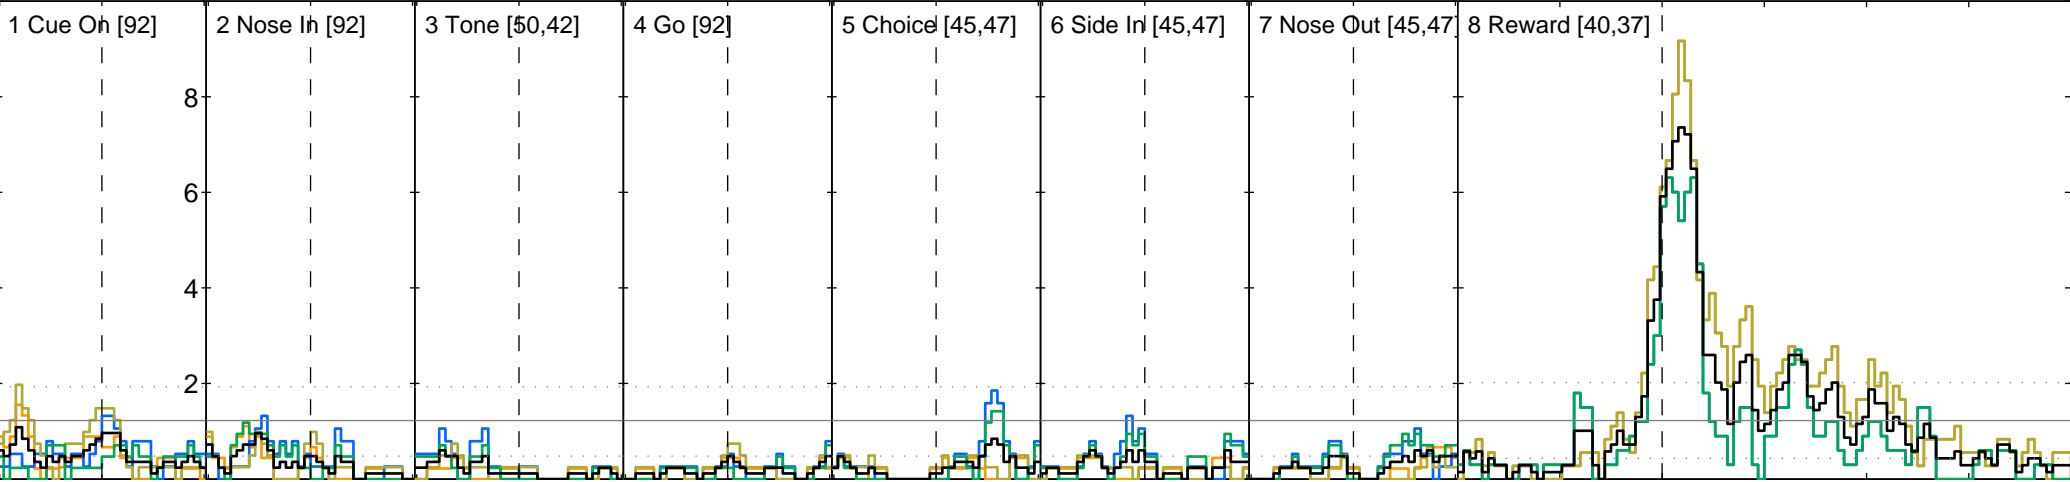

Cell: C0420070314T03a

AP: 4.2 ML: 2.2 DV: 2.5

w: 1 n: 7527  $P_{ISI>2}$ : 0.68

1/2pw: 218 $\mu$ s p $\rightarrow$ v: 997 $\mu$ s

$\beta_T$ : 0.93  $\beta_D$ : -2.7

$\beta_P$ : -2 SI: -0.69

Session FR: 1.02 Hz

Pk Ev: 8 - Reward (T2/Ipsi)

Pk FR: 14.1Hz (0.14s) M1<sub>p</sub>

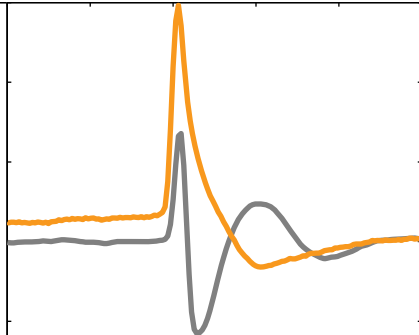

HP/PV

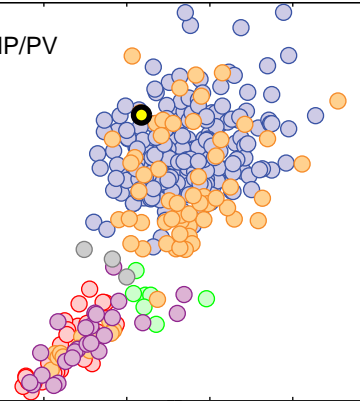

FR/PV

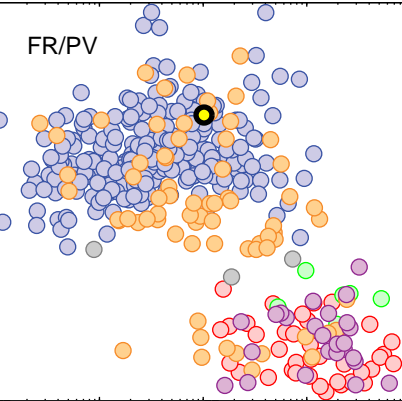

ISI Histogram [273]

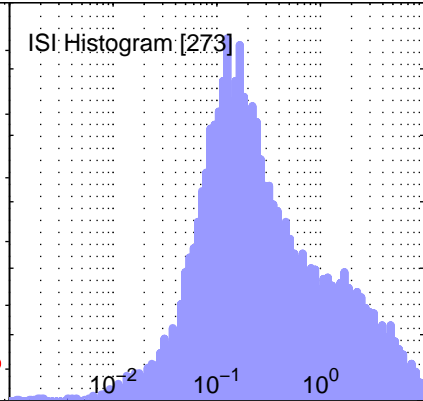

10  
20  
30  
40  
50  
60

1 Cue On [61] 2 Nose In [61] 3 Tone [33,28] 4 Go [61] 5 Choice [38,23] 6 Side In [38,23] 7 Nose Out [38,23] 8 Reward [15,11]

10  
5

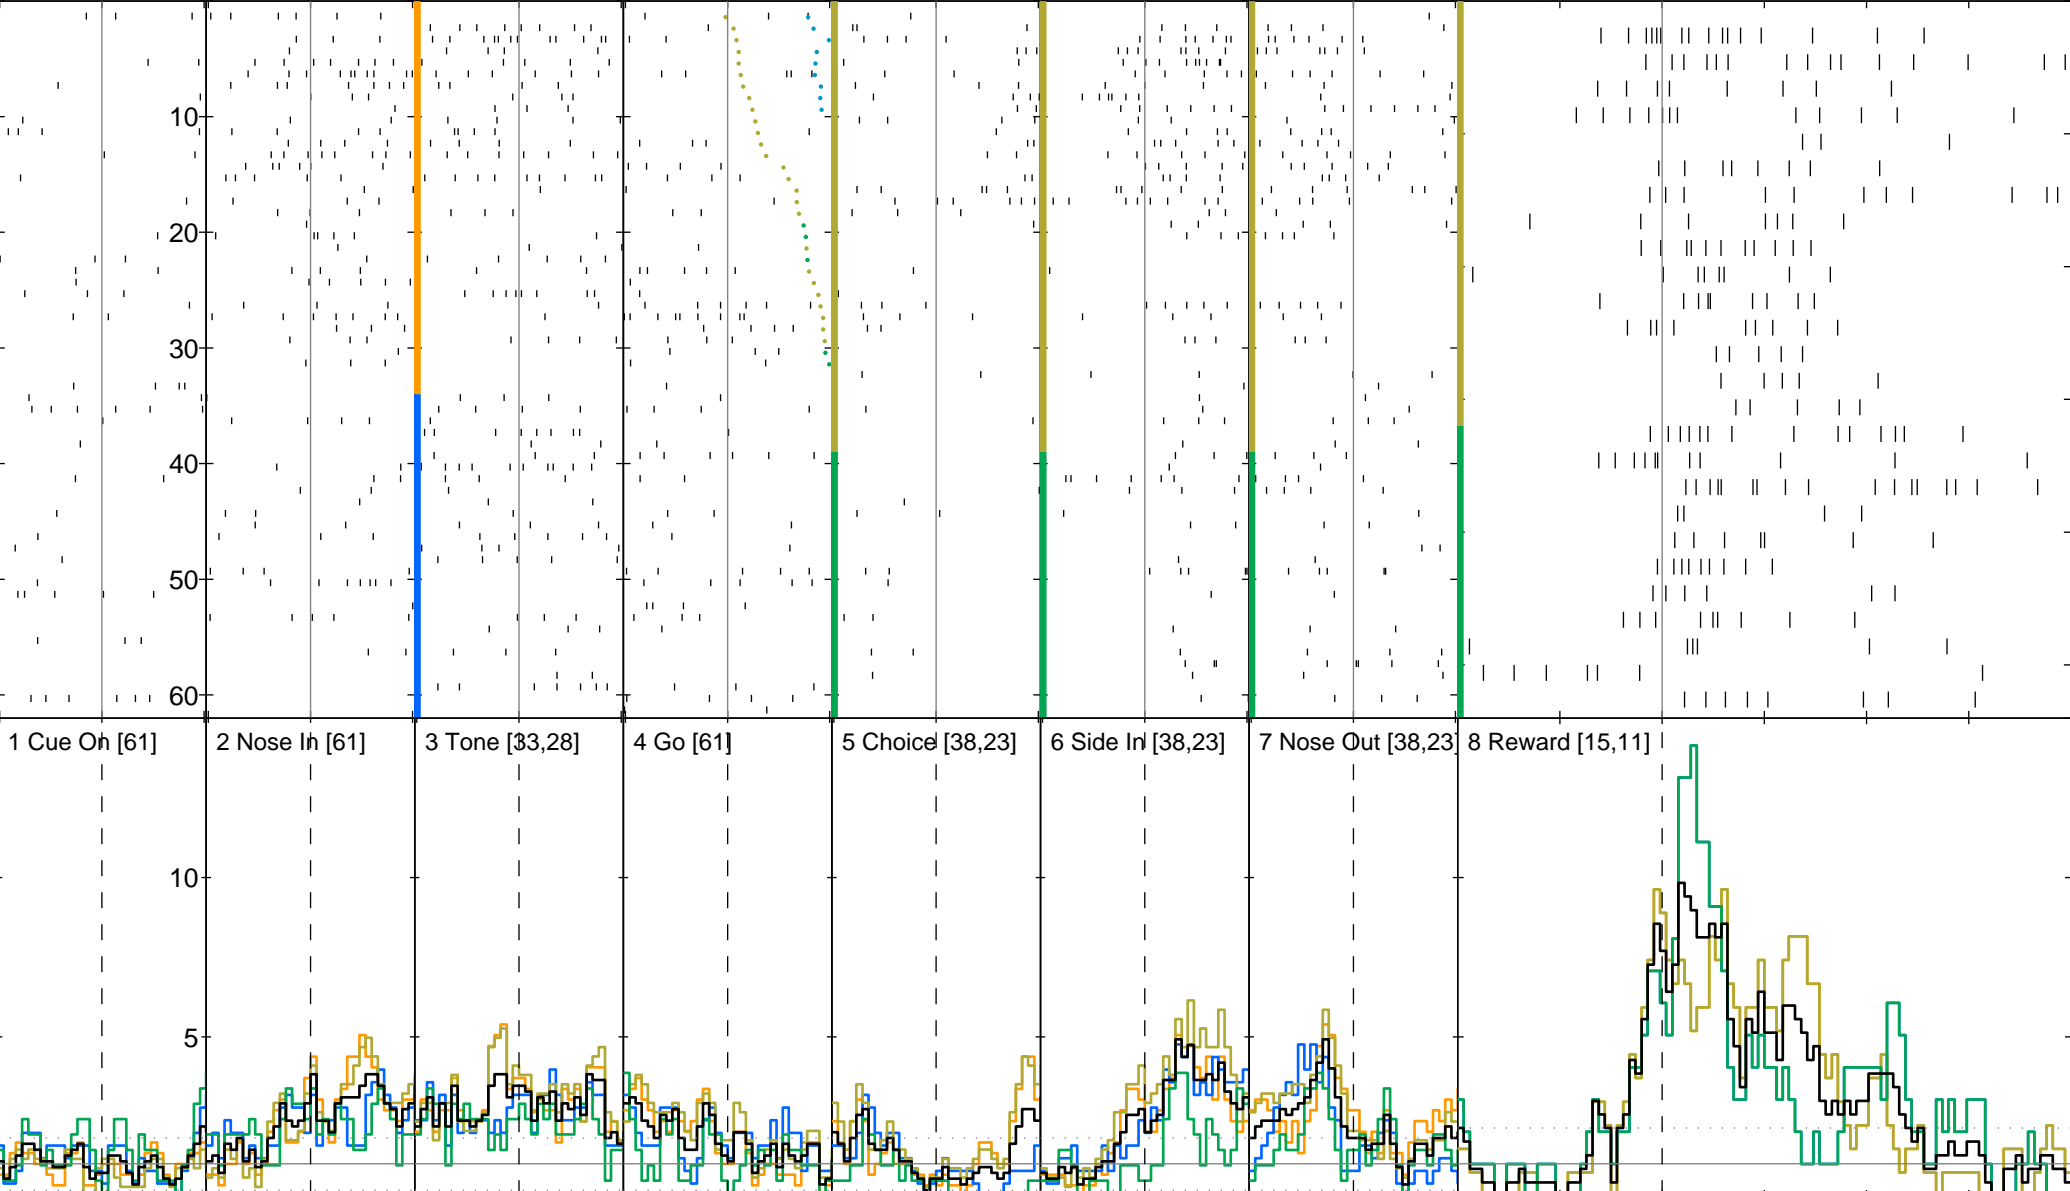

**Cell: C0420070314T02a**

AP: 3.7 ML: 2.8 DV: 3.3  
w: 2 n: 15439  $P_{ISI>2}$ : 0.4  
1/2pw: 290 $\mu$ s p $\rightarrow$ v: 1056 $\mu$ s  
 $\beta_T$ : -2.2  $\beta_D$ : -2.4  
 $\beta_P$ : 3.1 SI: -0.84  
Session FR: 2.08 Hz  
Pk Ev: 8 - Reward (T2/Ipsi)  
Pk FR: 21.2Hz (0.26s) **M1<sub>p</sub>**

## Waveform

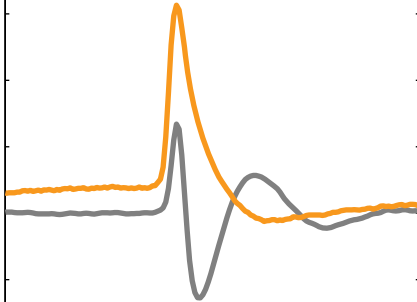

## HP/PV

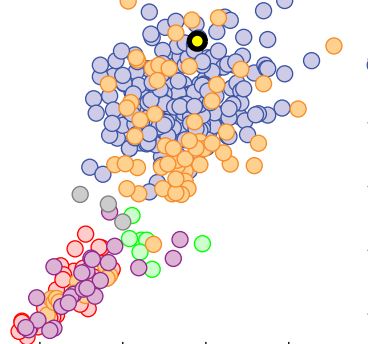

## FR/PV

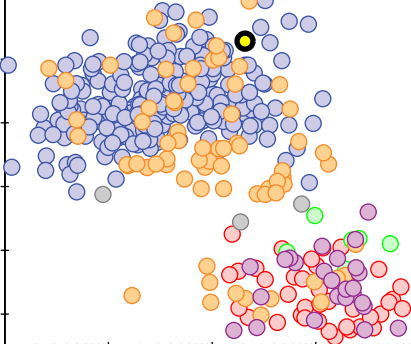

## ISI Histogram [525]

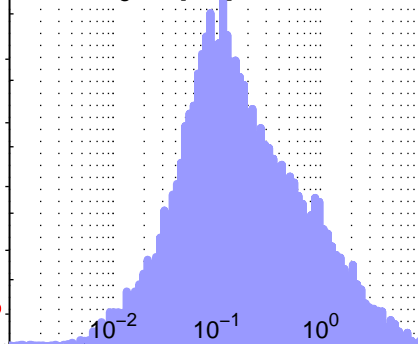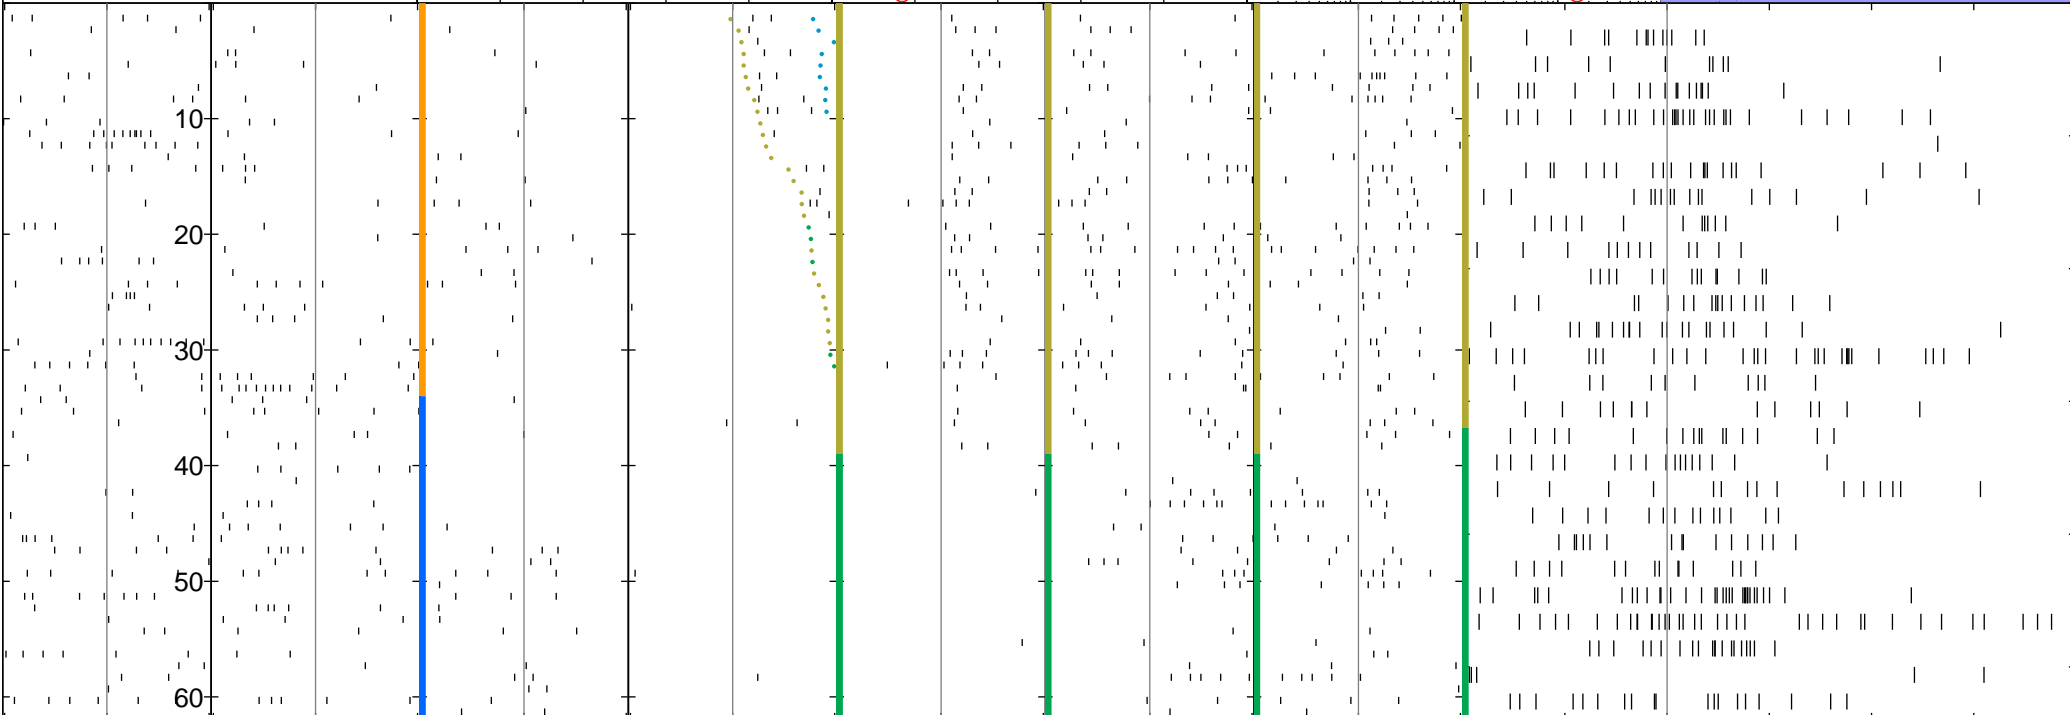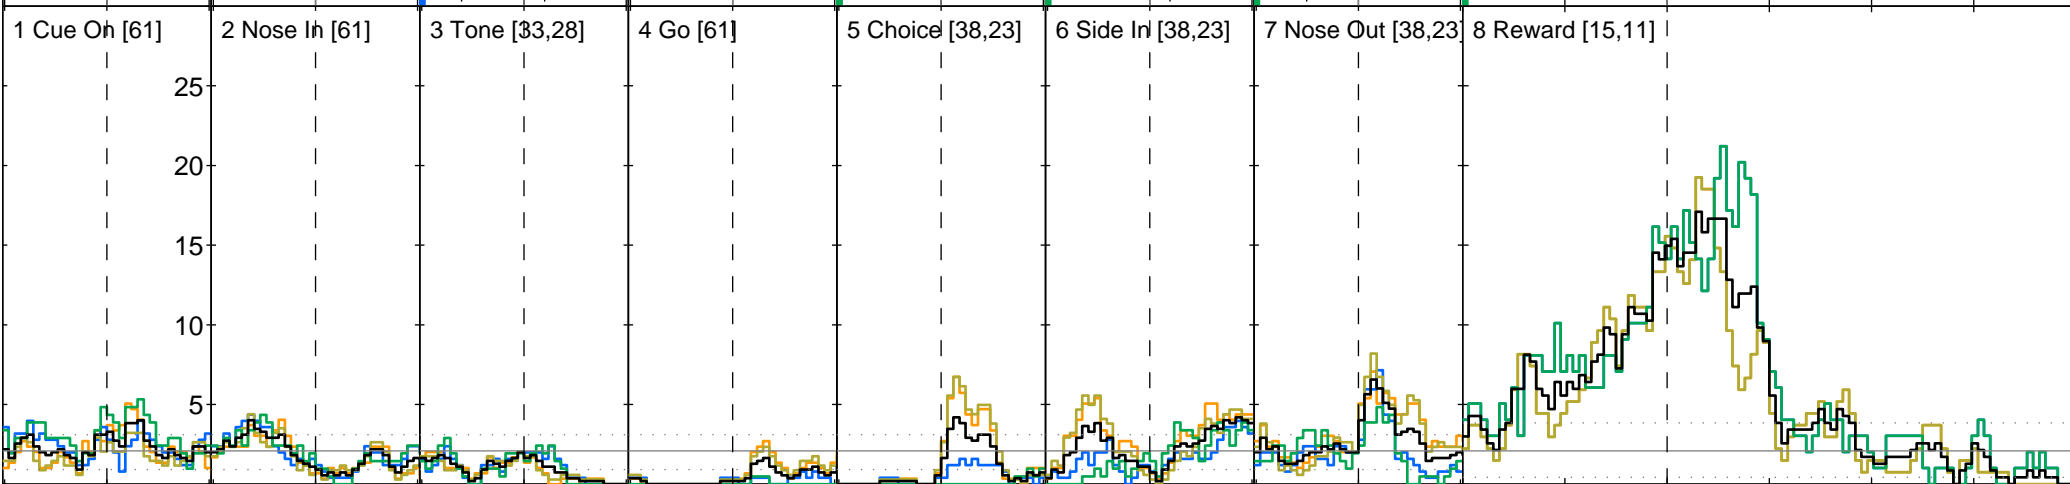



**Cell: C1220071027T01b**

AP: 4.2 ML: 3.6 DV: 1.8

w: 3 n: 6990  $P_{ISI>2}$ : 0.471/2pw: 298 $\mu$ s p->v: 718 $\mu$ s $\beta_T$ : NaN  $\beta_D$ : NaN $\beta_P$ : NaN SI: NaN

Session FR: 1.17 Hz

Pk Ev: 8 - Reward (T1/Con)

Pk FR: 6.54Hz (0.26s) **M1<sub>p</sub>**

Waveform

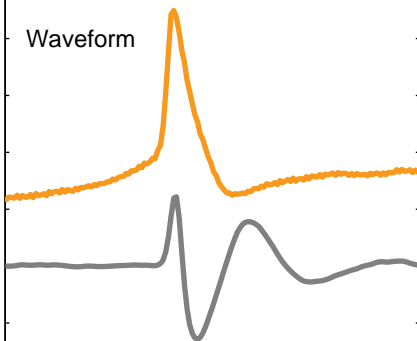

HP/PV

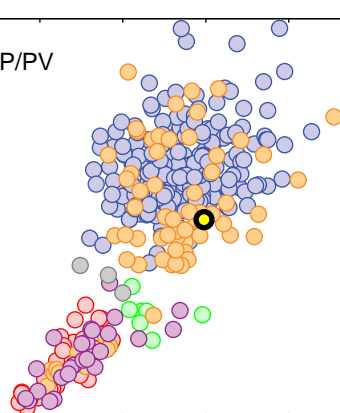

FR/PV

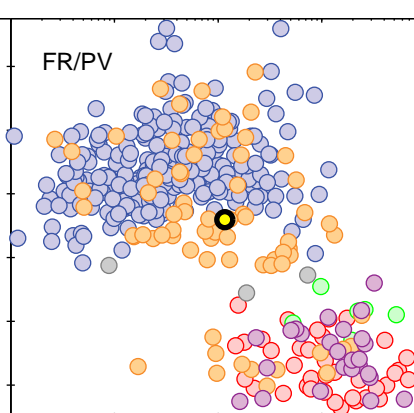

ISI Histogram [189]

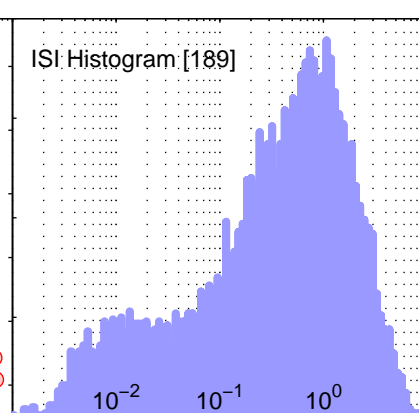

10

20

30

40

50

60

1 Cue On [64]

2 Nose In [64]

3 Tone [27,37]

4 Go [64]

5 Choice [23,41]

6 Side In [23,41]

7 Nose Out [23,41]

8 Reward [17,34]

7

6

5

4

3

2

1

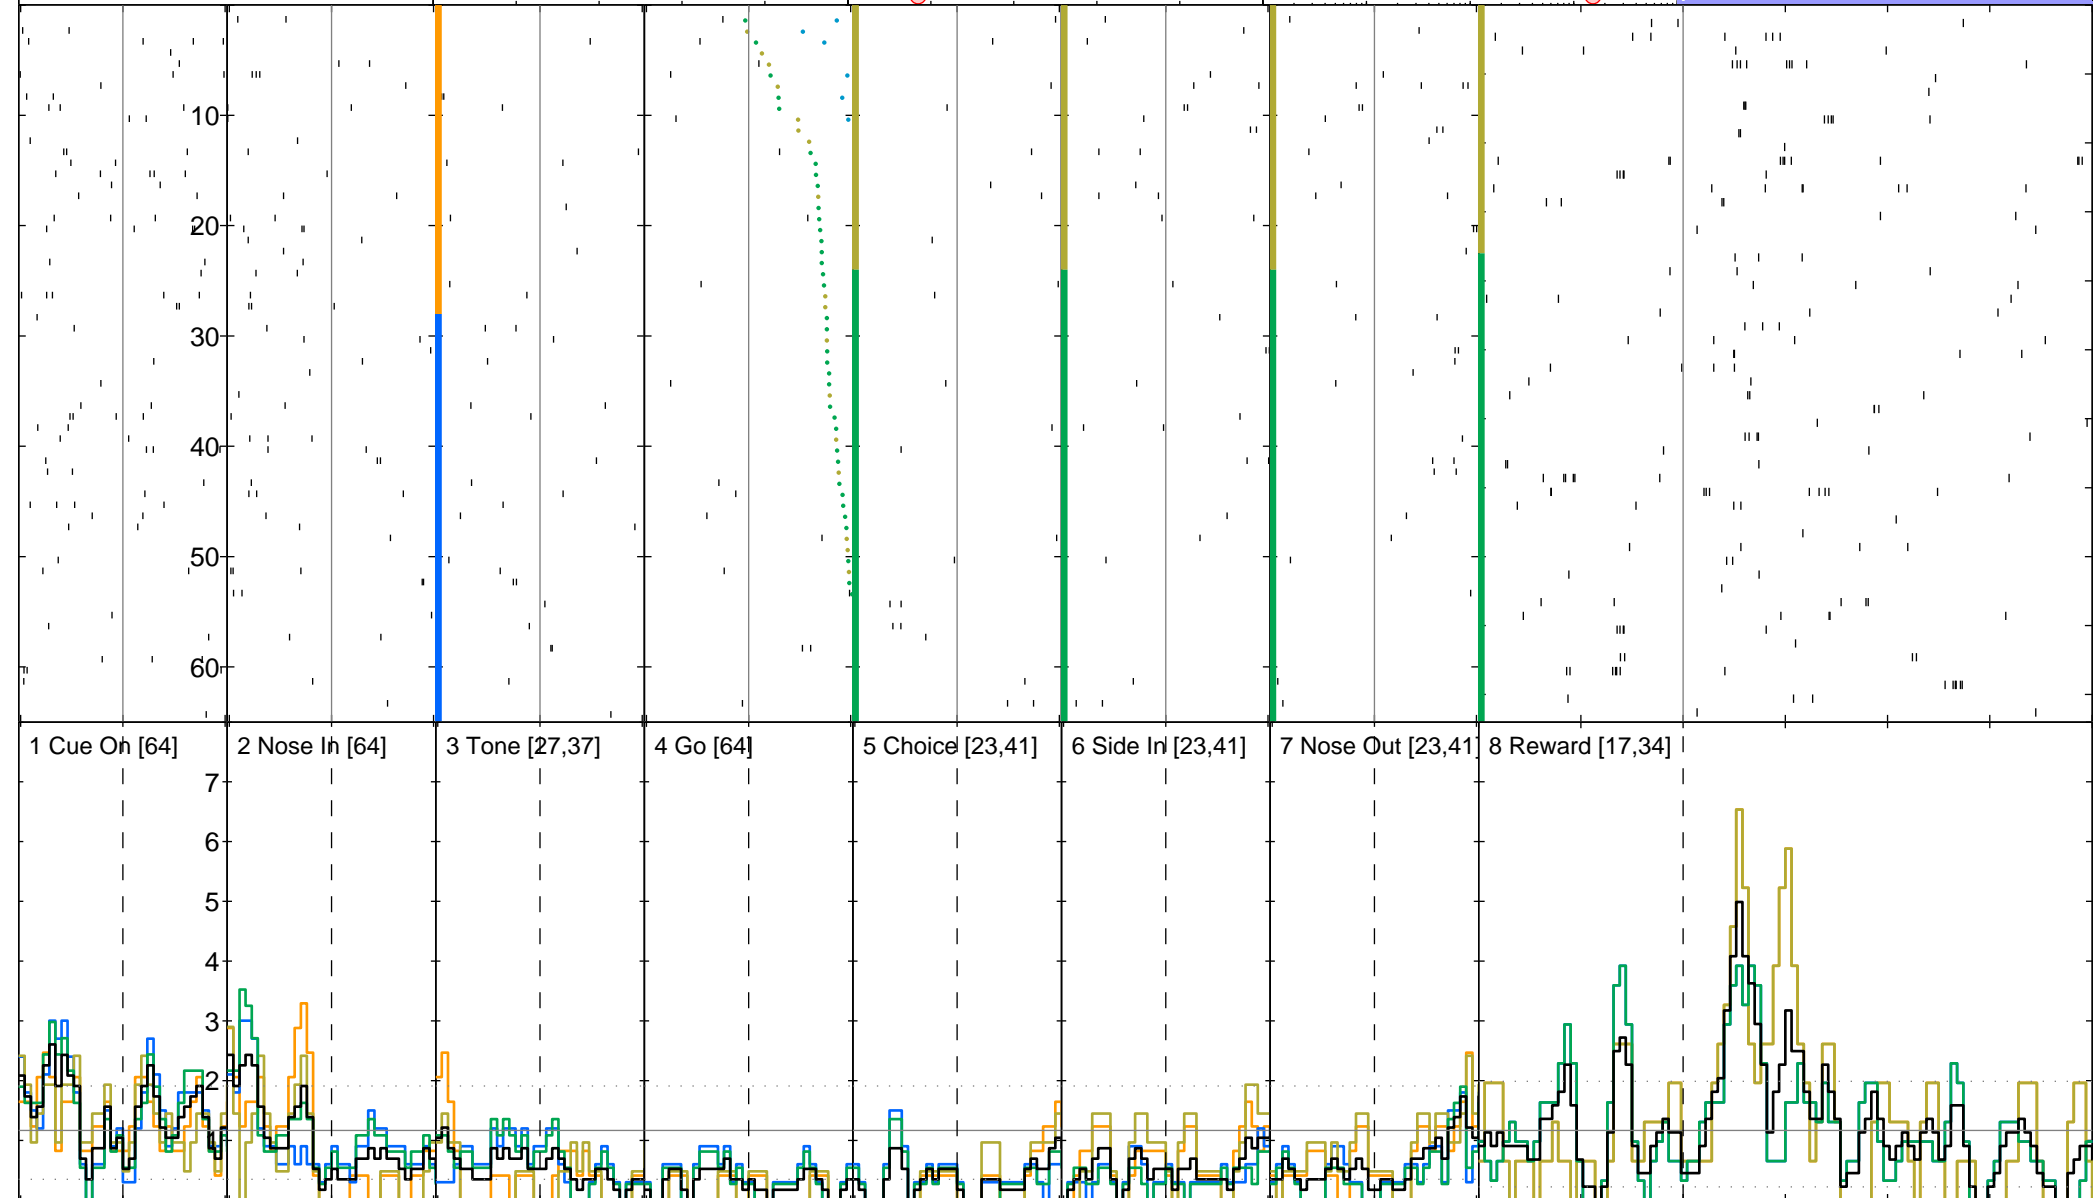

**Cell: C0420070314T02e**

AP: 3.7 ML: 2.8 DV: 3.3

w: 1 n: 12337  $P_{ISI>2}$ : 0.391/2pw: 182 $\mu$ s p $\rightarrow$ v: 922 $\mu$ s $\beta_T$ : 2.5  $\beta_D$ : 2.5 $\beta_P$ : 1.6 SI: NaN

Session FR: 1.66 Hz

Pk Ev: 8 - Reward (T1/Con)

Pk FR: 9.63Hz (0.41s) **M1<sub>p</sub>**

Waveform

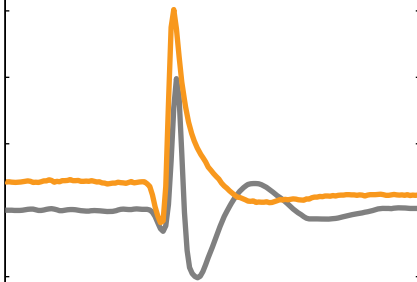

HP/PV

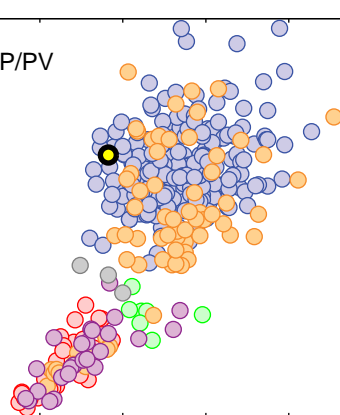

FR/PV

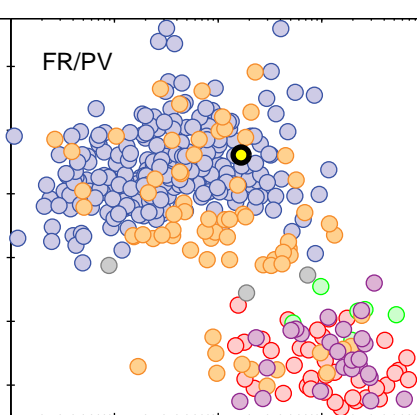

ISI Histogram [401]

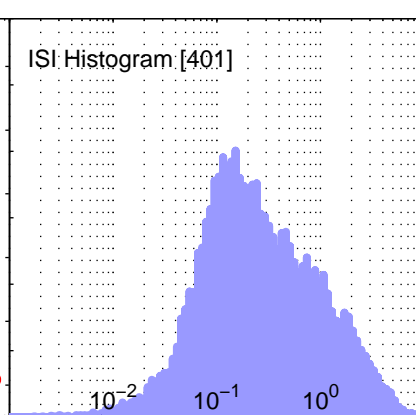

10

20

30

40

50

60

1 Cue On [61]

2 Nose In [61]

3 Tone [33,28]

4 Go [61]

5 Choice [38,23]

6 Side In [38,23]

7 Nose Out [38,23]

8 Reward [15,11]

8

6

4

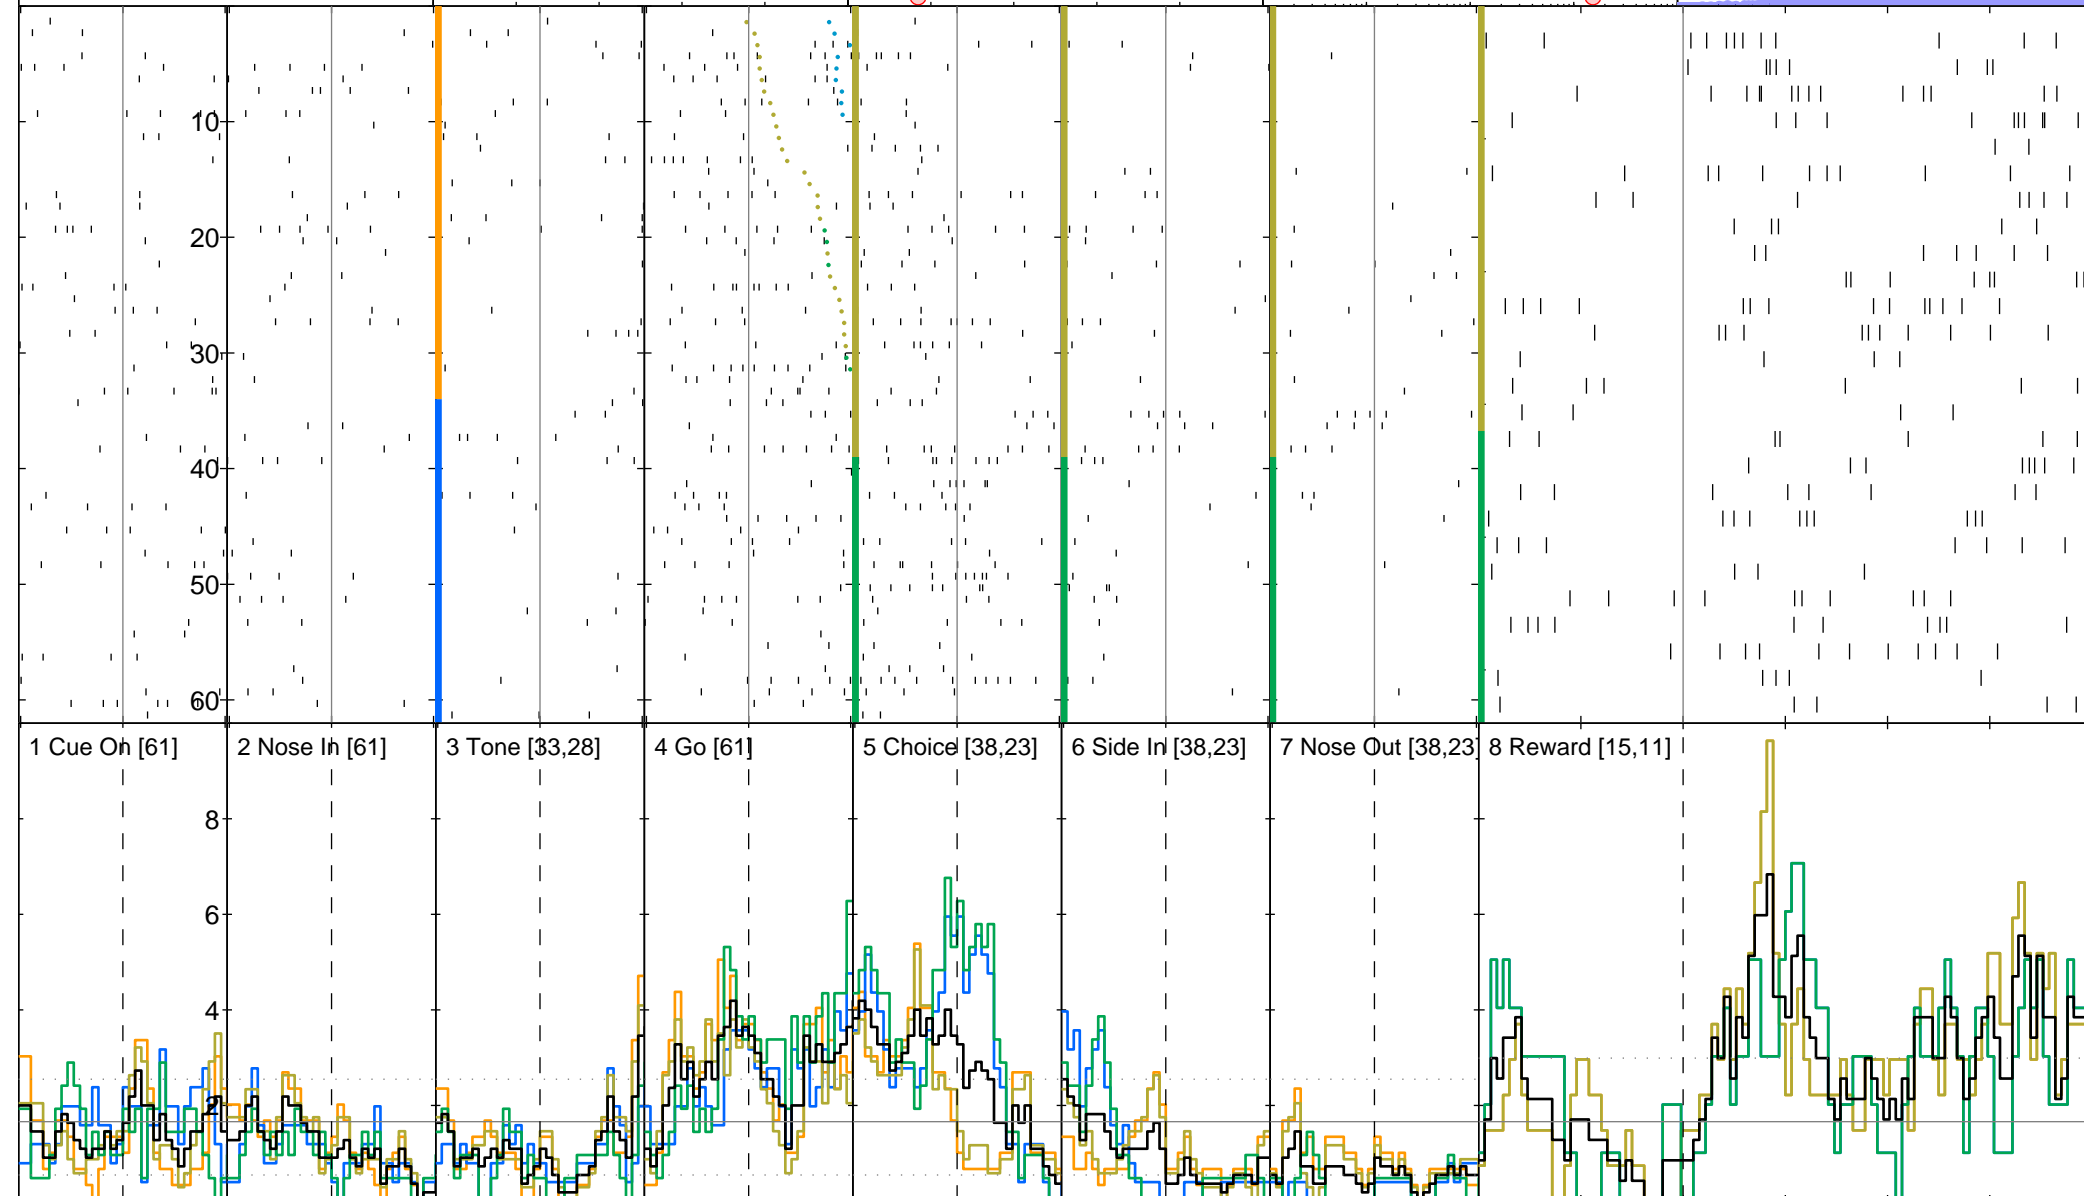

**Cell: C1220071027T03a**

AP: 3.2 ML: 2.6 DV: 2.2  
w: 3 n: 24734  $P_{ISI>2}$ : 0.074  
1/2pw: 264 $\mu$ s p $\rightarrow$ v: 581 $\mu$ s  
 $\beta_T$ : 2.8  $\beta_D$ : -3.1  
 $\beta_P$ : 3.1 SI: 0.23  
Session FR: 4.12 Hz  
Pk Ev: 8 - Reward (T1/Con) **M1<sub>P</sub>**  
Pk FR: 15.7Hz (0.5s)

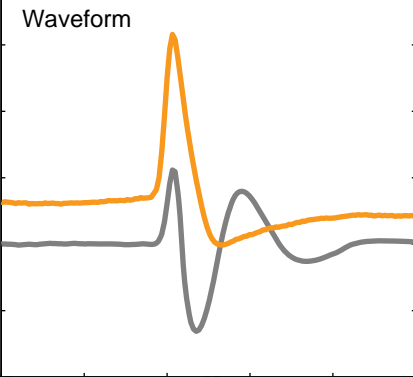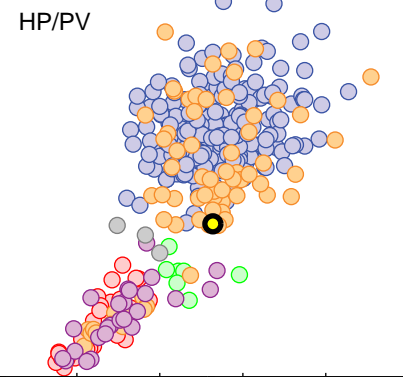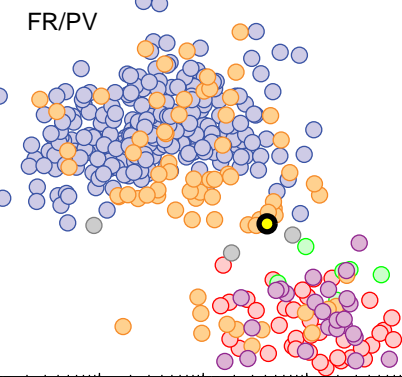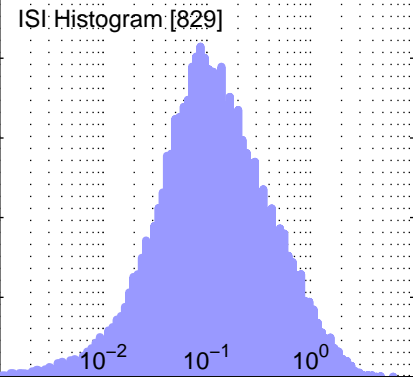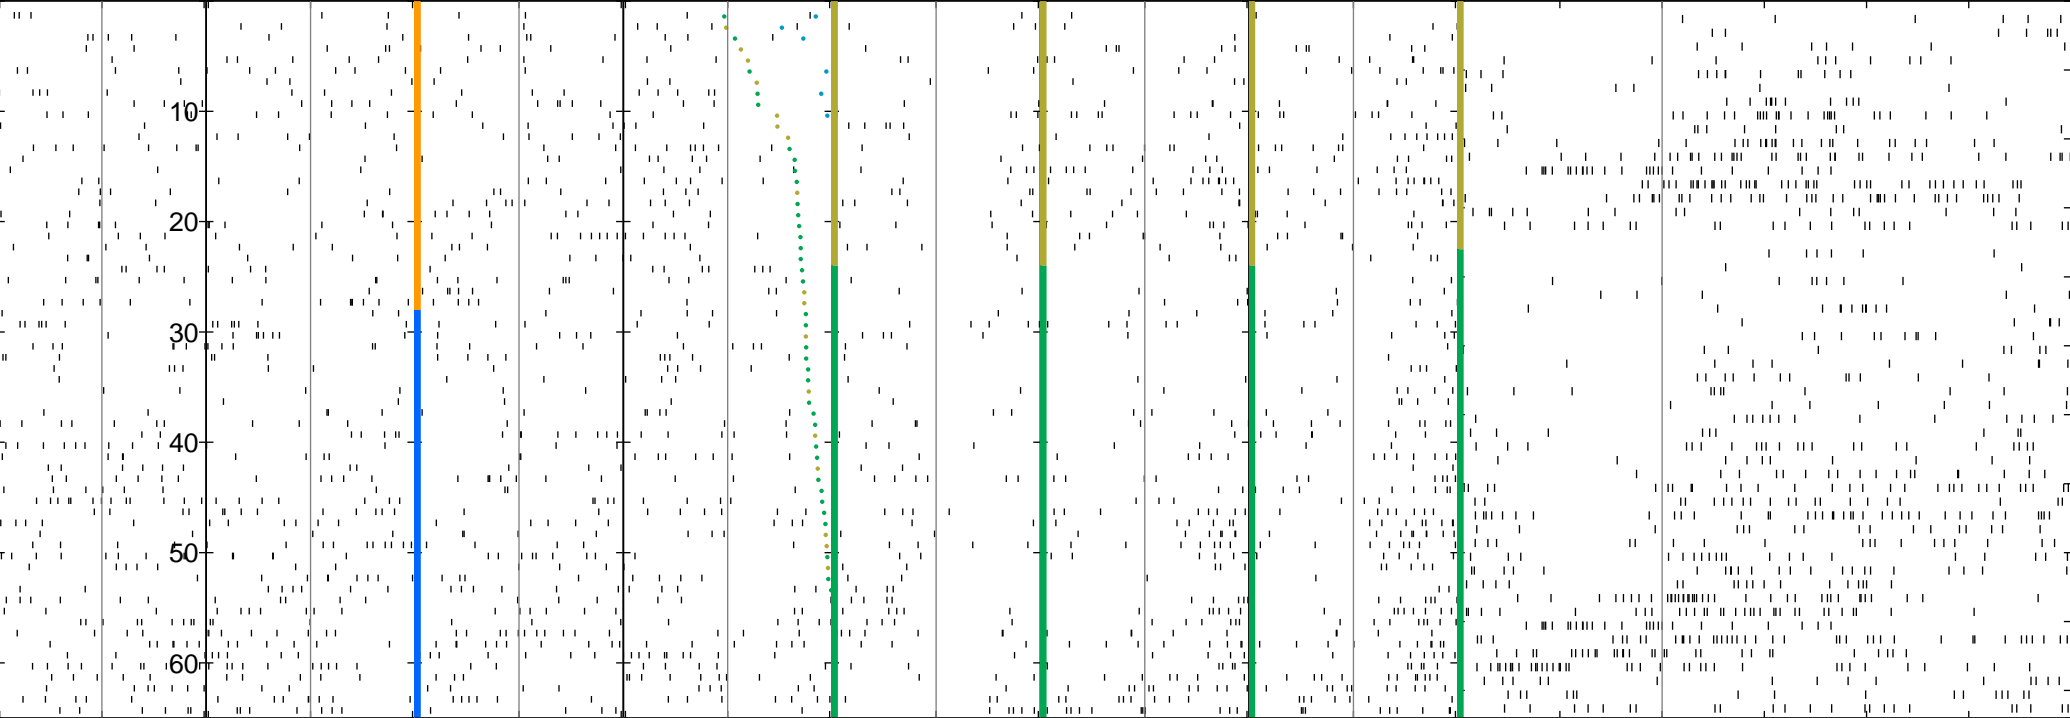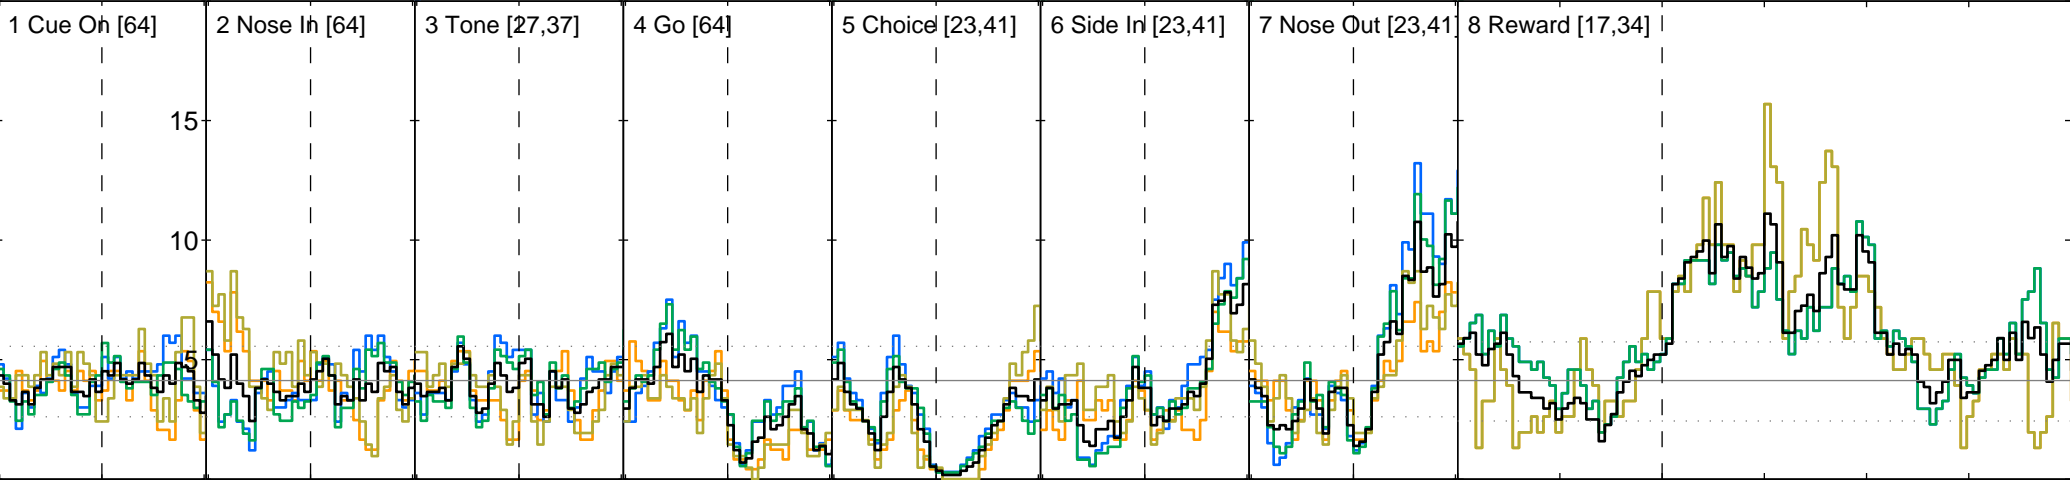

**Cell: C0420070314T02F**

AP: 3.7 ML: 2.8 DV: 3.3  
w: 2 n: 5197  $P_{ISI>2}$ : 0.79  
1/2pw: 283 $\mu$ s p->v: 1123 $\mu$ s  
 $\beta_T$ : NaN  $\beta_D$ : NaN  
 $\beta_P$ : NaN SI: NaN  
Session FR: 0.701 Hz  
Pk Ev: 8 - Reward (T2/Ipsi)  
Pk FR: 6.06Hz (0.83s) **M1<sub>P</sub>**

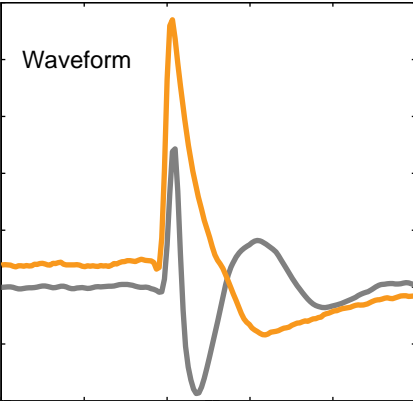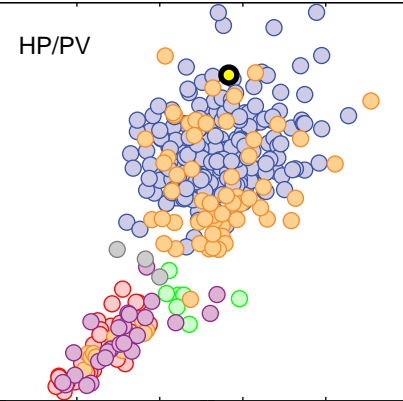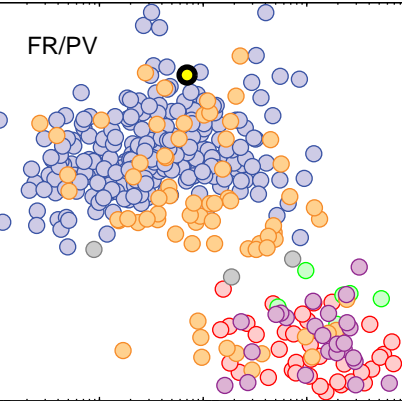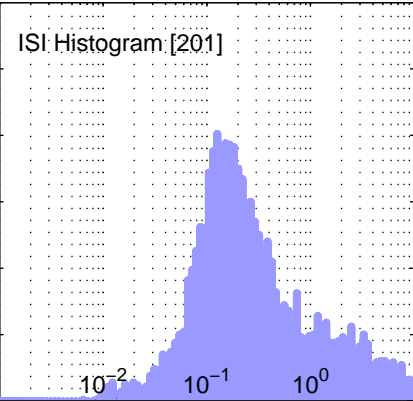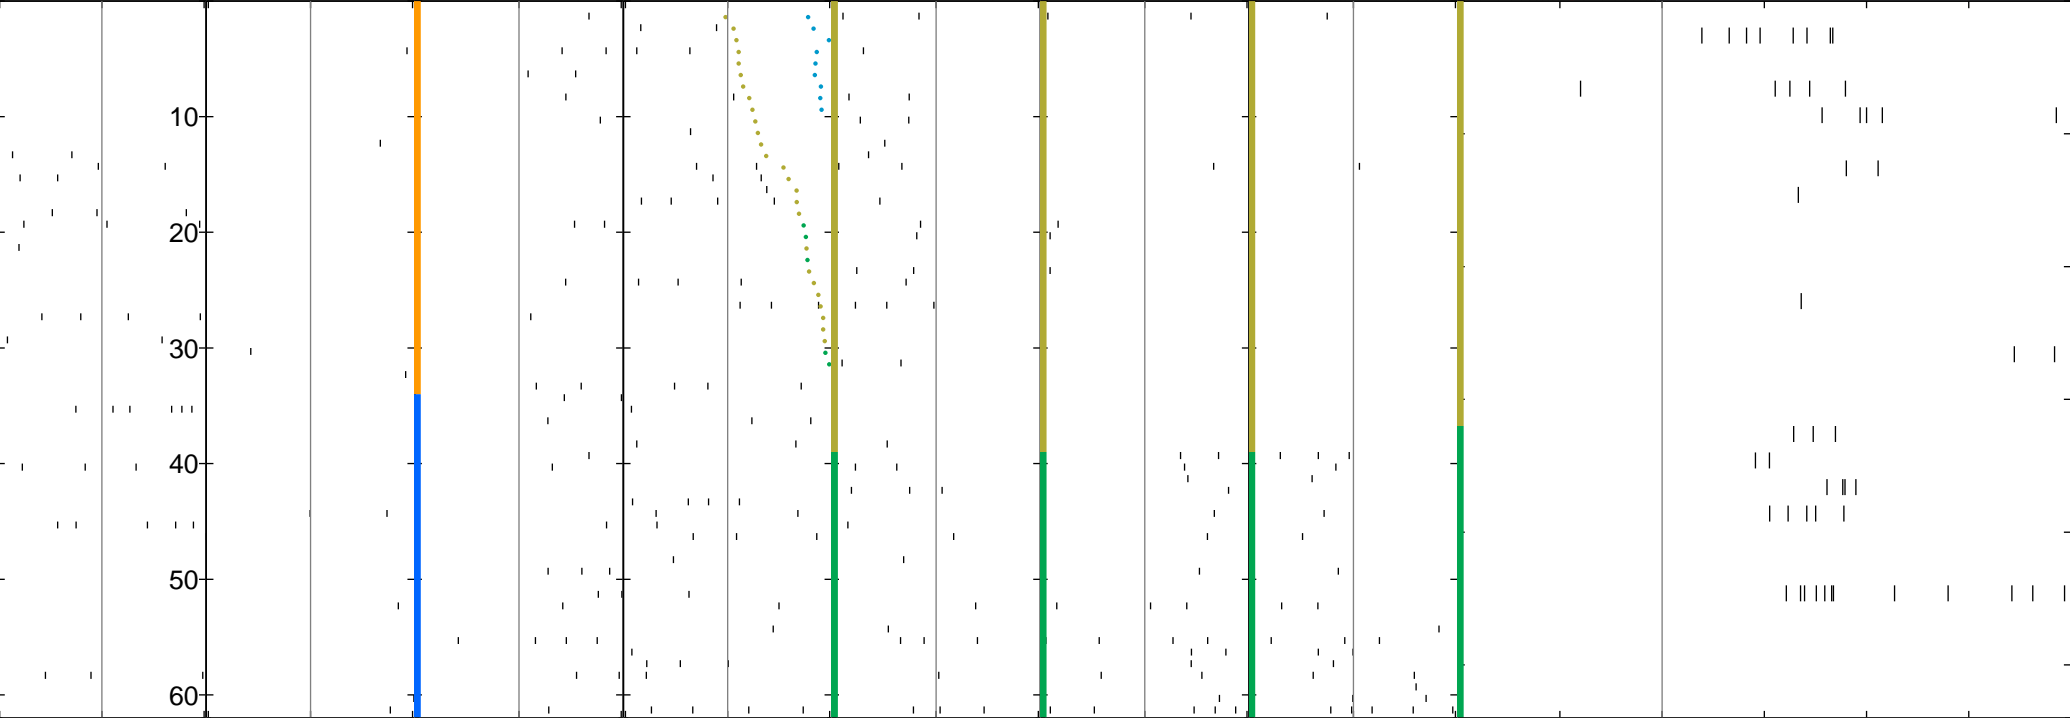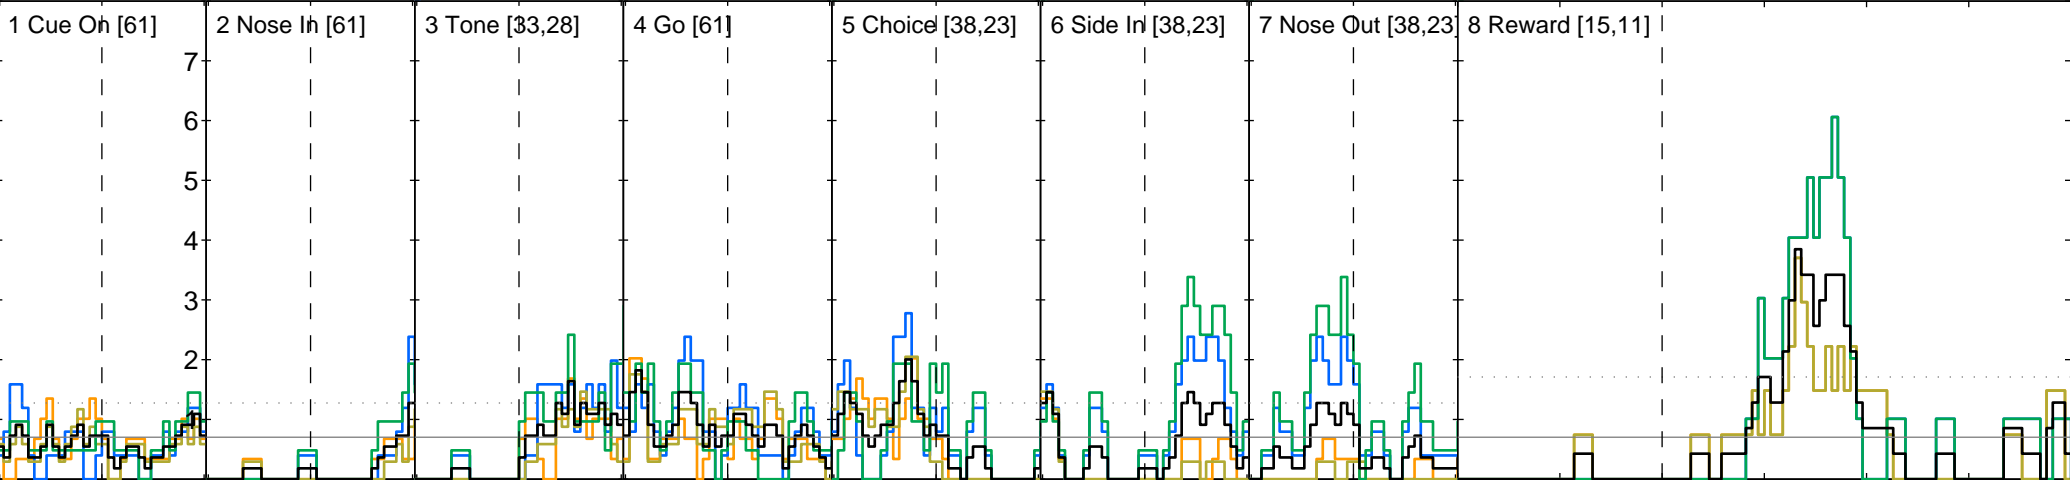

Cell: C0420070312T02b

AP: 3.7 ML: 2.8 DV: 3.2

w: 4 n: 6907  $P_{ISI>2}$ : 0.58

1/2pw: 238 $\mu$ s p $\rightarrow$ v: 827 $\mu$ s

$\beta_T$ : NaN  $\beta_D$ : NaN

$\beta_P$ : NaN SI: NaN

Session FR: 1.54 Hz

Pk Ev: 8 - Reward (T2/Ipsi)

Pk FR: 38.2Hz (0.92s) **M1<sub>p</sub>**

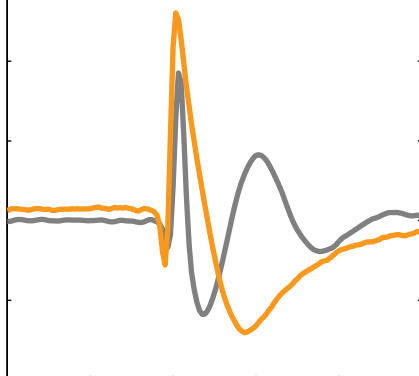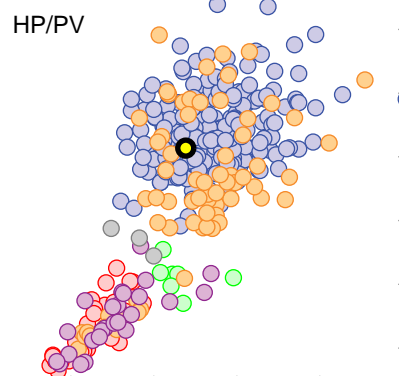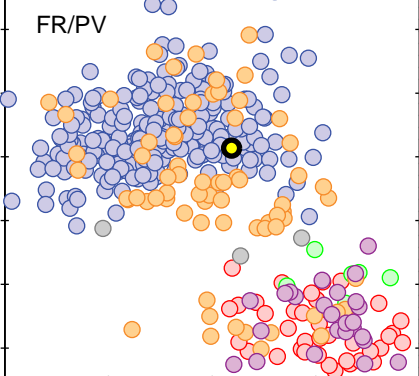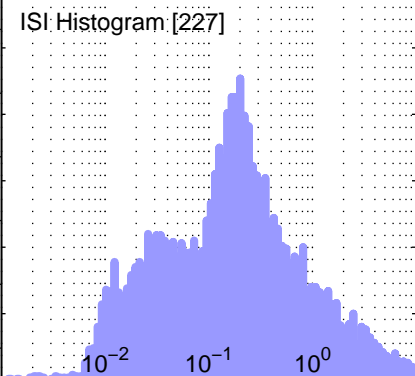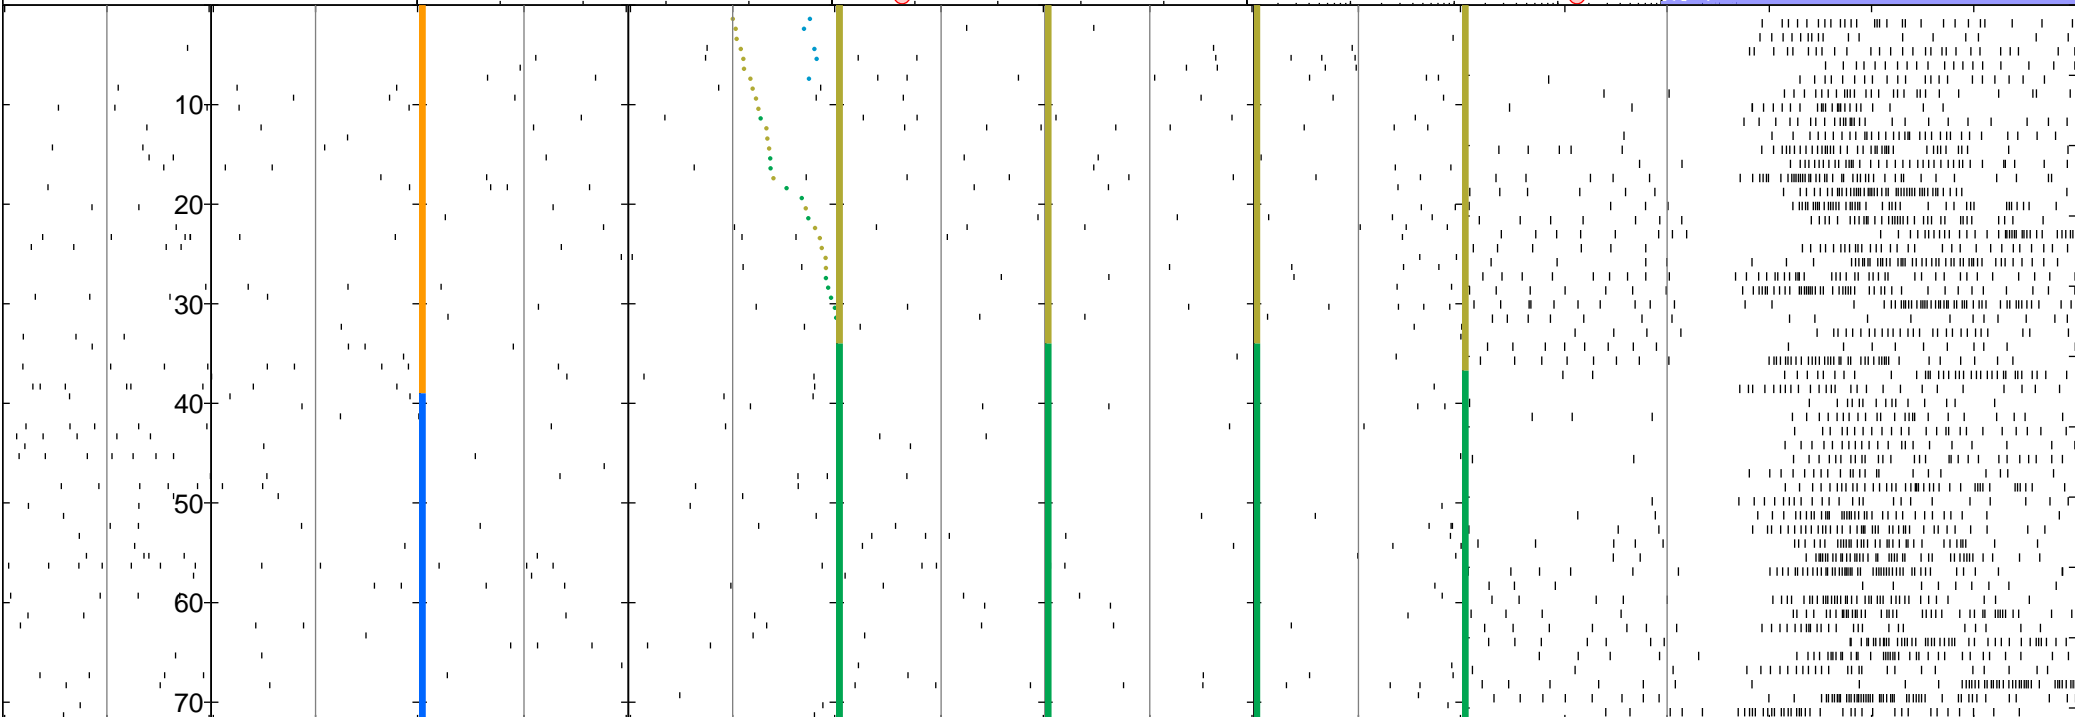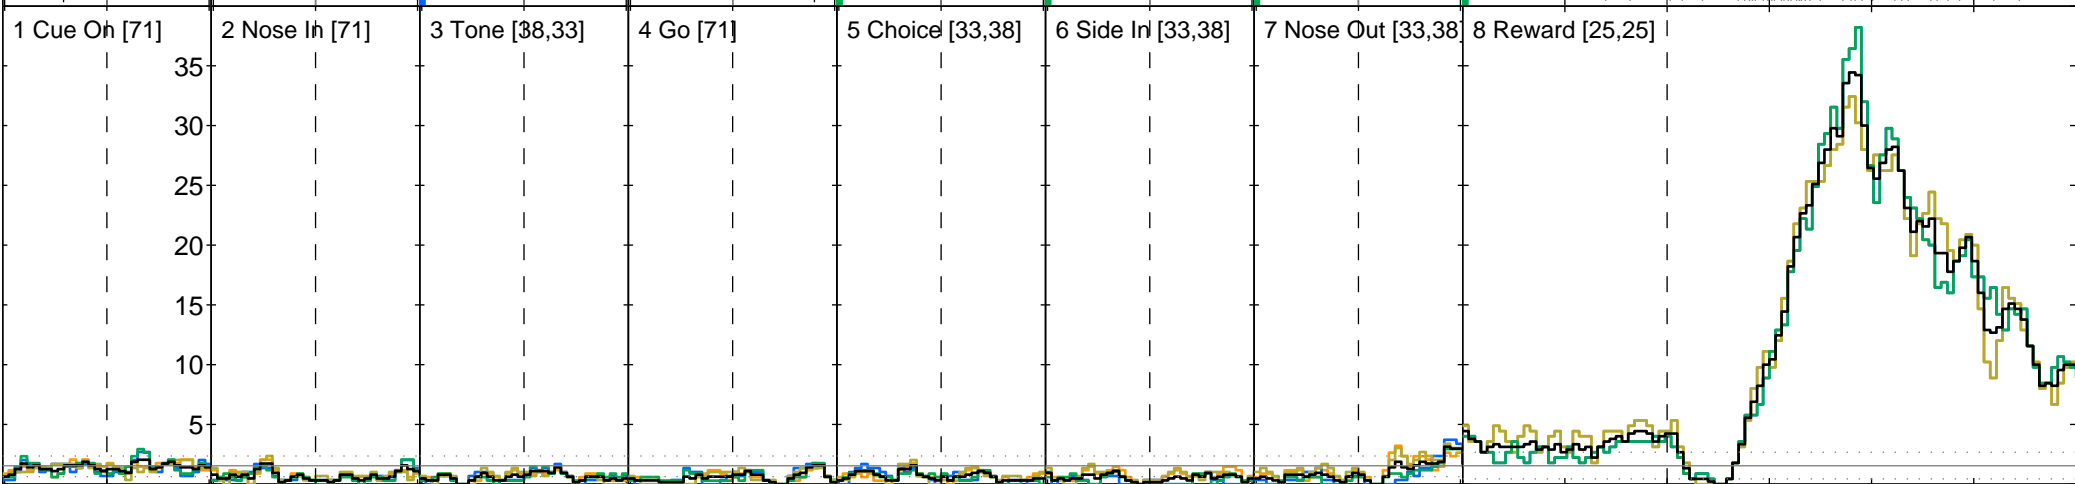

Cell: C0420070314T02d

AP: 3.7 ML: 2.8 DV: 3.3

w: 4 n: 8579  $P_{ISI>2}$ : 0.69

1/2pw: 216 $\mu$ s p $\rightarrow$ v: 1005 $\mu$ s

$\beta_T$ : NaN  $\beta_D$ : NaN

$\beta_P$ : NaN SI: NaN

Session FR: 1.16 Hz

Pk Ev: 8 - Reward (T1/Con)

Pk FR: 6.67Hz (1.43s) **M1<sub>P</sub>**

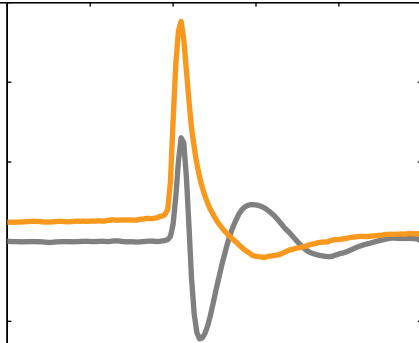

HP/PV

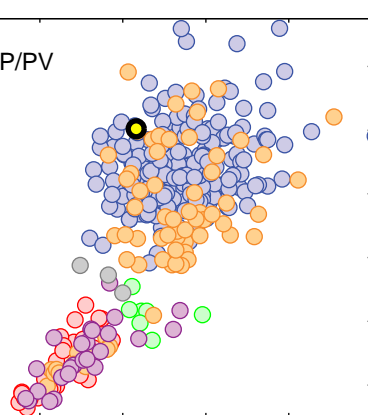

FR/PV

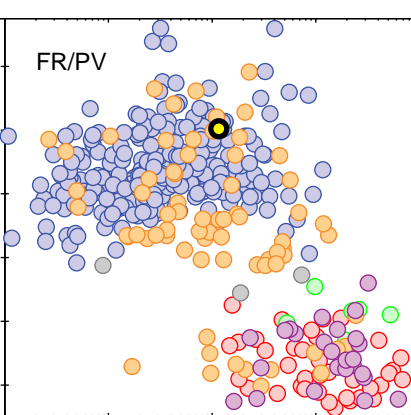

ISI Histogram [300]

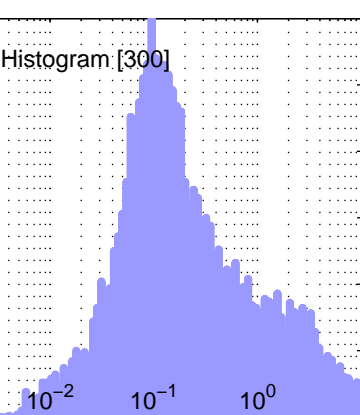

10  
20  
30  
40  
50  
60

1 Cue On [61] 2 Nose In [61] 3 Tone [33,28] 4 Go [61] 5 Choice [38,23] 6 Side In [38,23] 7 Nose Out [38,23] 8 Reward [15,11]

7  
6  
5  
4  
3  
2

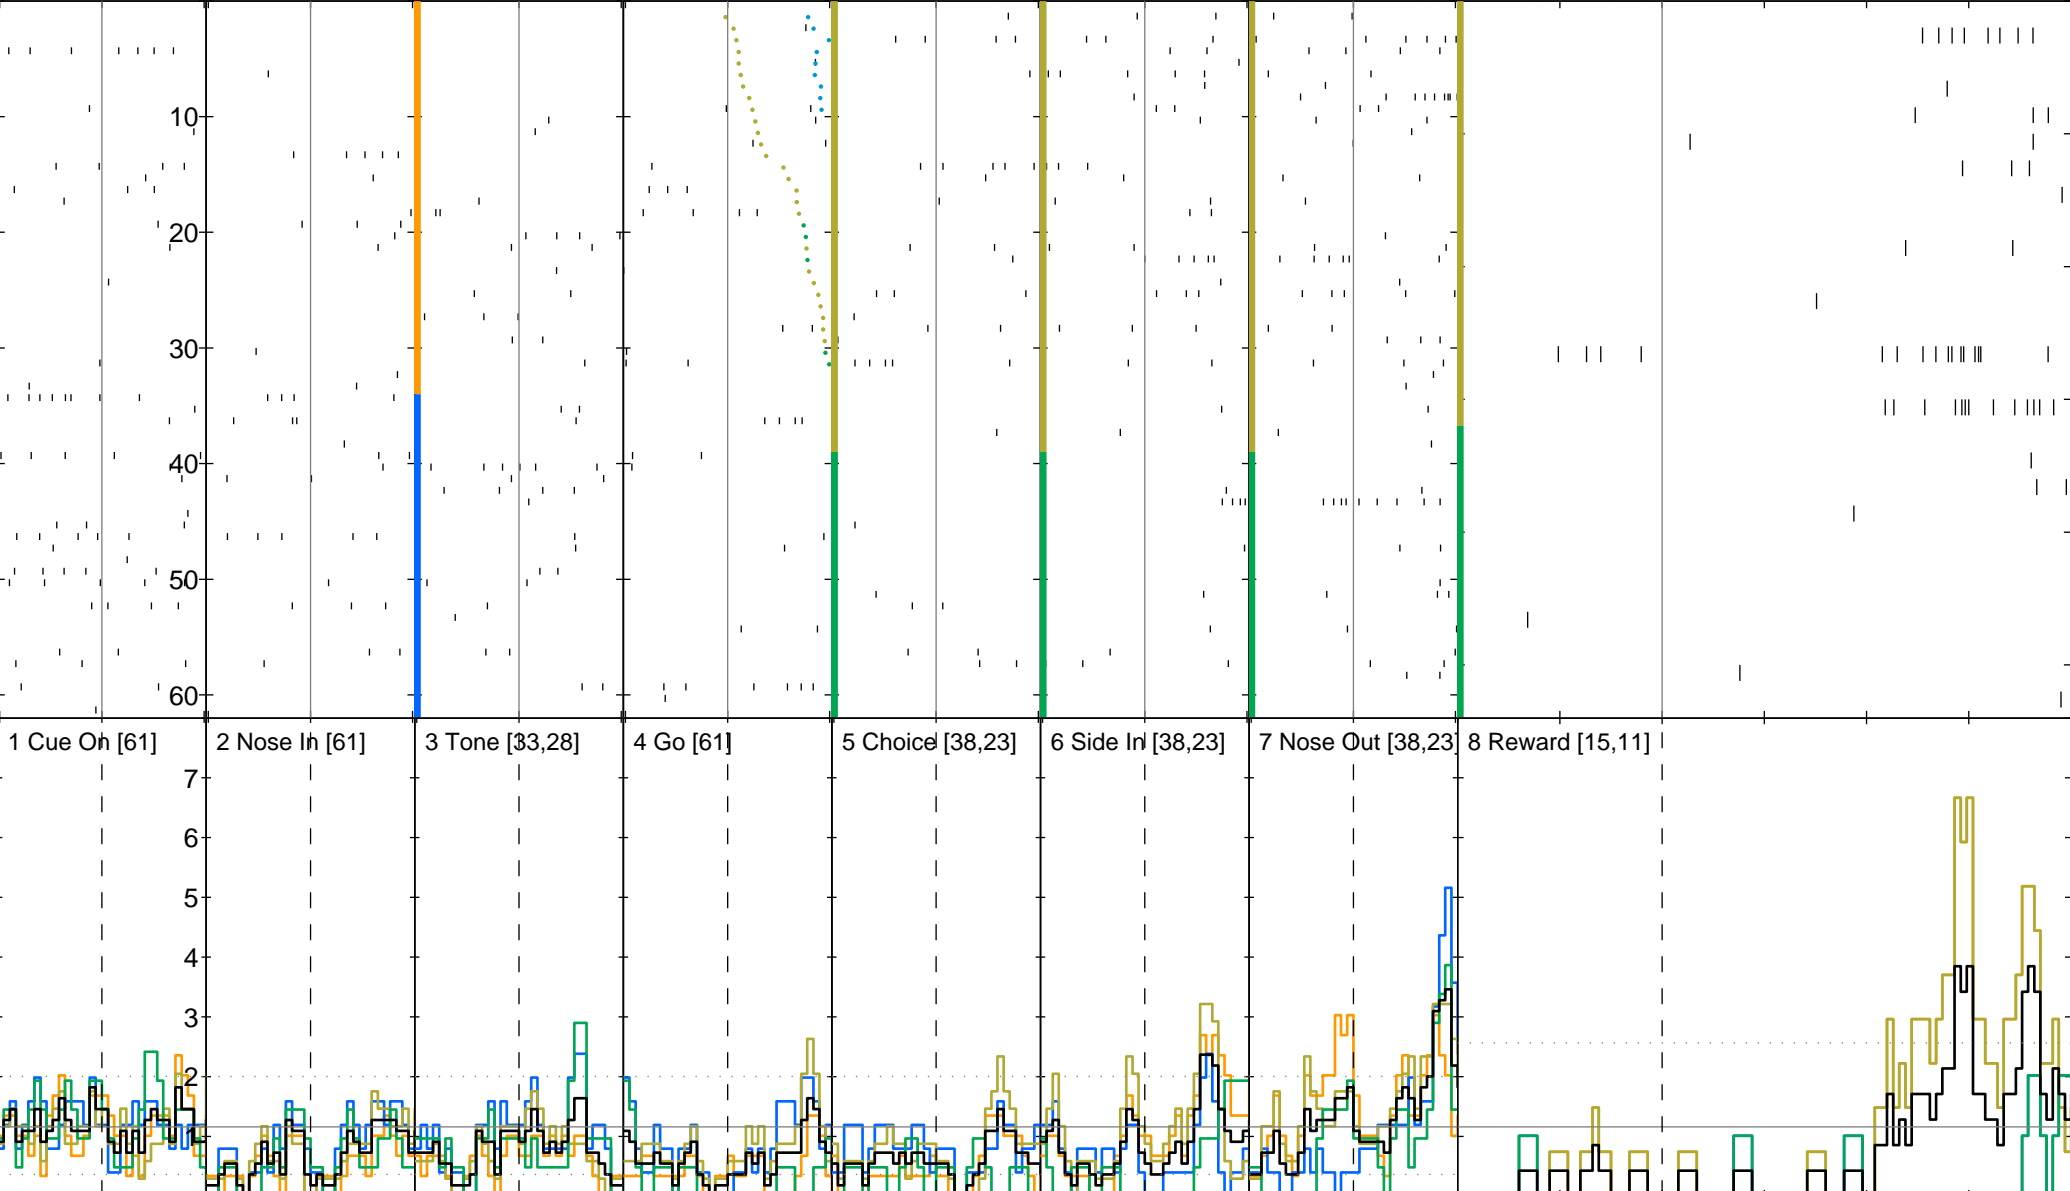

**Cell: C1220071025T01a**

AP: 4.2 ML: 3.6 DV: 1.6

w: 1 n: 3667  $P_{ISI>2}$ : 0.791/2pw: 264 $\mu$ s p->v: 624 $\mu$ s $\beta_T$ : NaN  $\beta_D$ : NaN $\beta_P$ : NaN SI: NaN

Session FR: 0.544 Hz

Pk Ev: None

Pk FR: --

M1<sub>P</sub>

Waveform

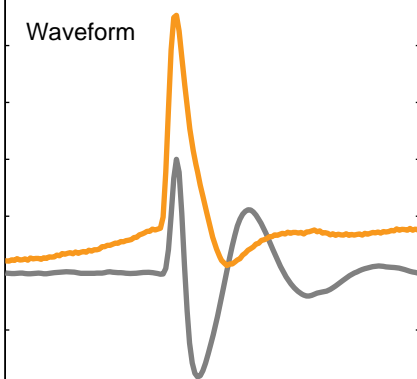

HP/PV

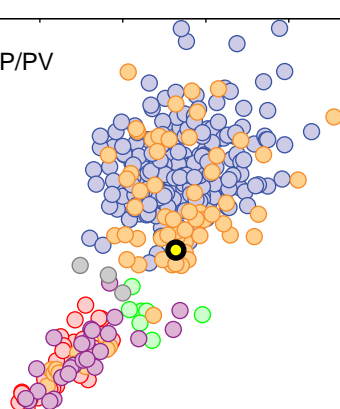

FR/PV

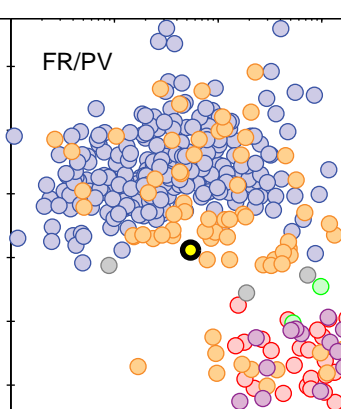

ISI Histogram [94]

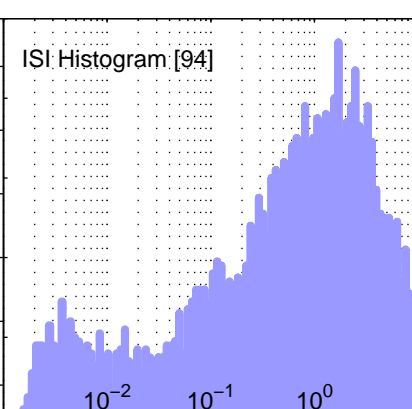

10

20

30

40

50

60

70

1 Cue On [77]

2 Nose In [77]

3 Tone [44,33]

4 Go [77]

5 Choice [38,39]

6 Side In [38,39]

7 Nose Out [38,39]

8 Reward [31,26]

5

4

3

2

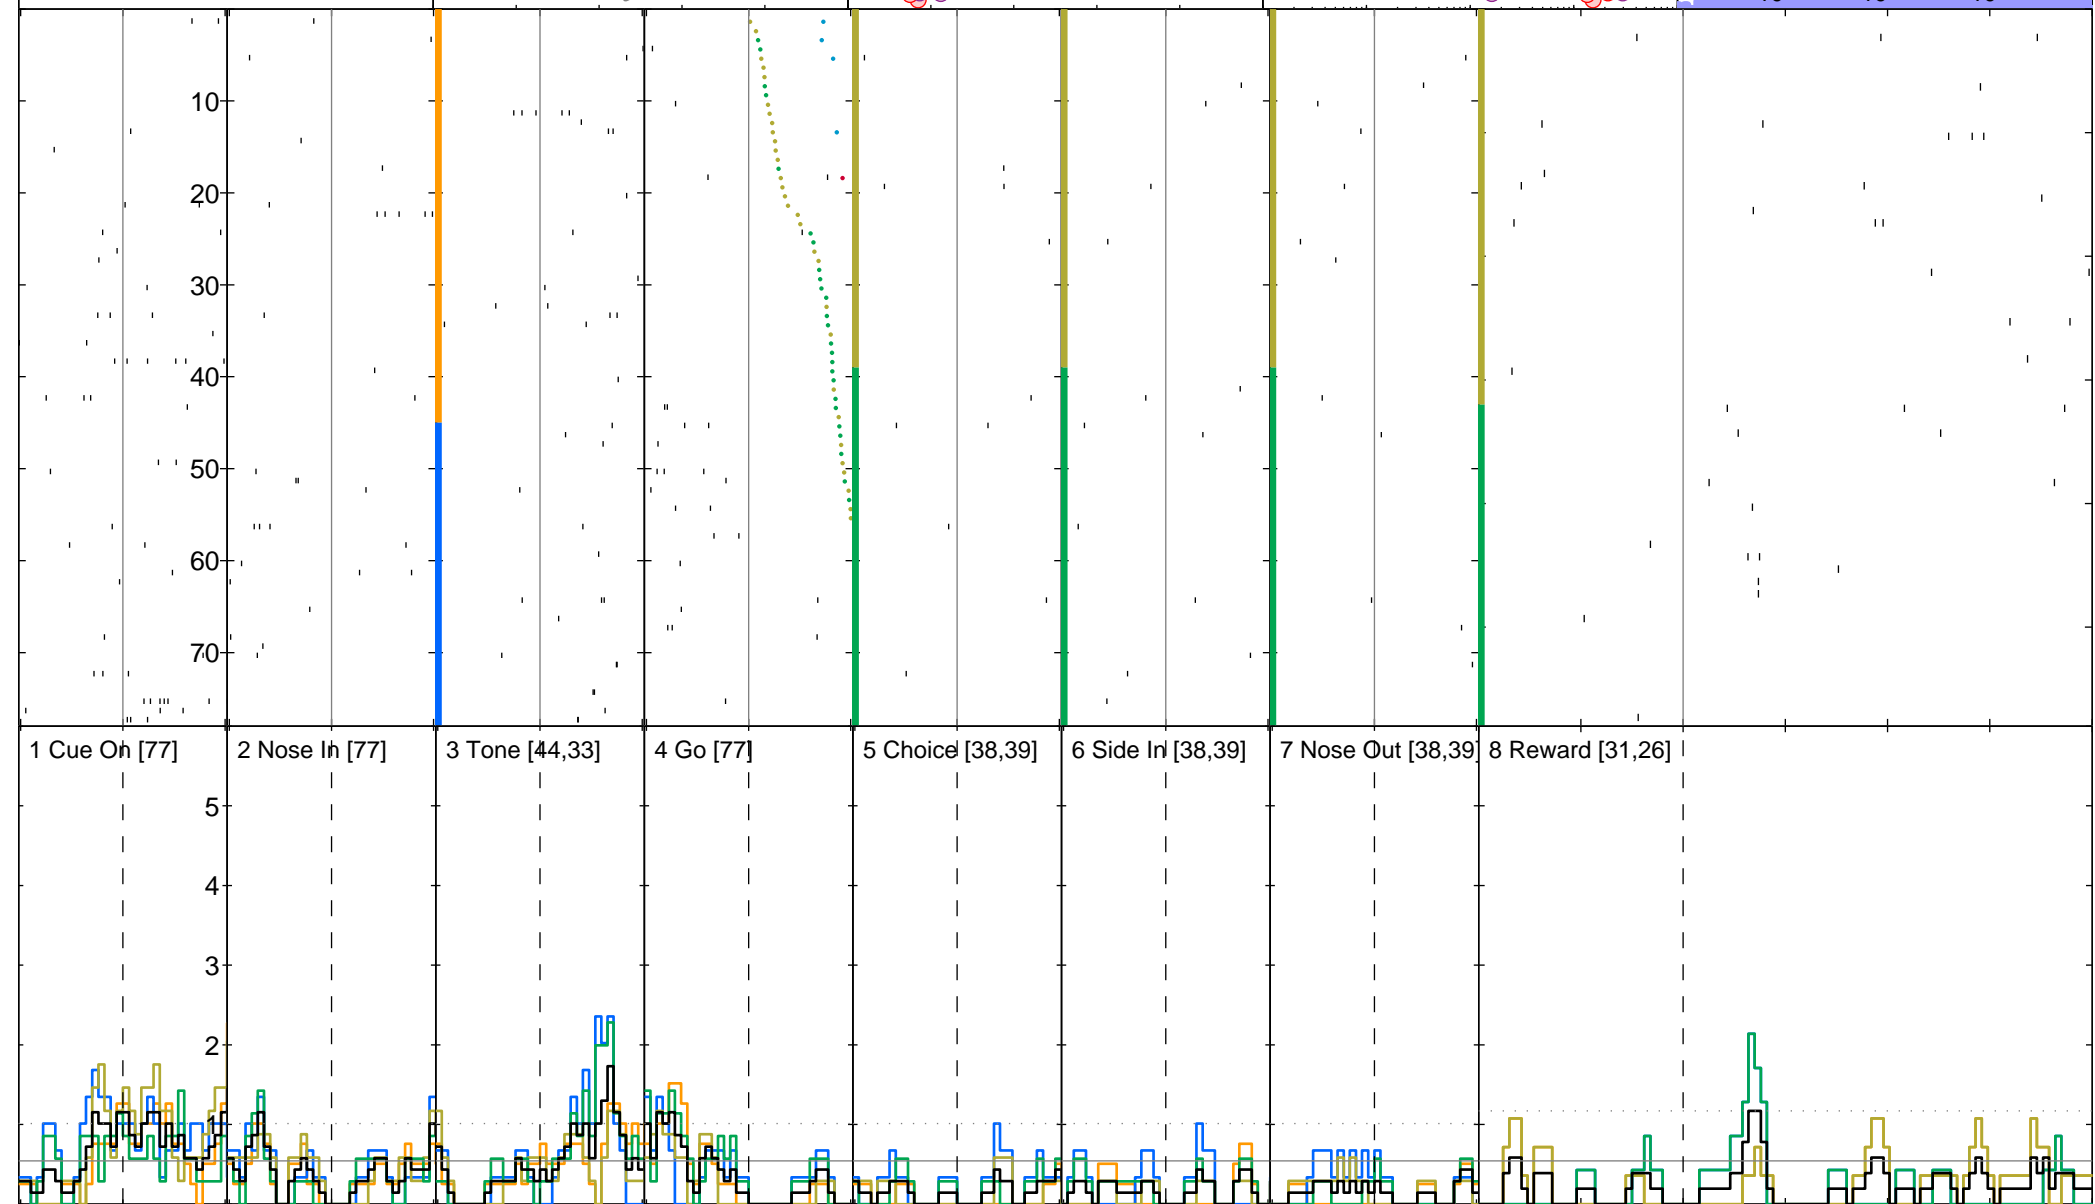

**Cell: C1220071025T01c**

AP: 4.2 ML: 3.6 DV: 1.6  
w: 3 n: 3139  $P_{ISI>2}$ : 0.81  
1/2pw: 325 $\mu$ s p $\rightarrow$ v: 771 $\mu$ s  
 $\beta_T$ : NaN  $\beta_D$ : NaN  
 $\beta_P$ : NaN SI: NaN  
Session FR: 0.466 Hz  
Pk Ev: None  
Pk FR: --

M1<sub>P</sub>

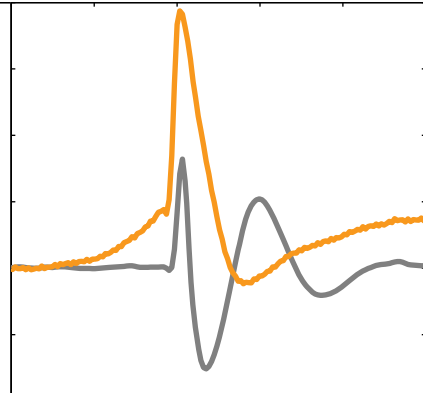

HP/PV

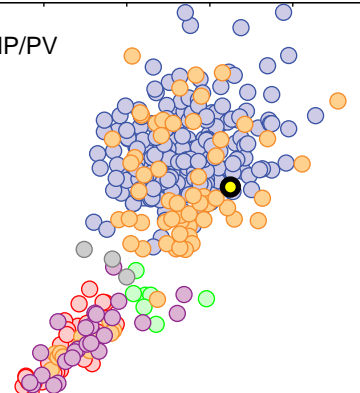

FR/PV

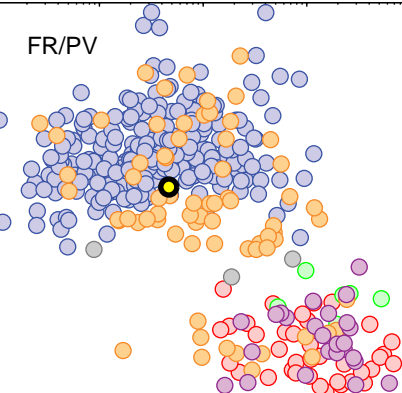

ISI Histogram [88]

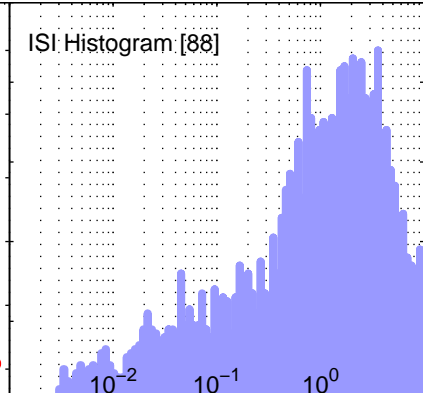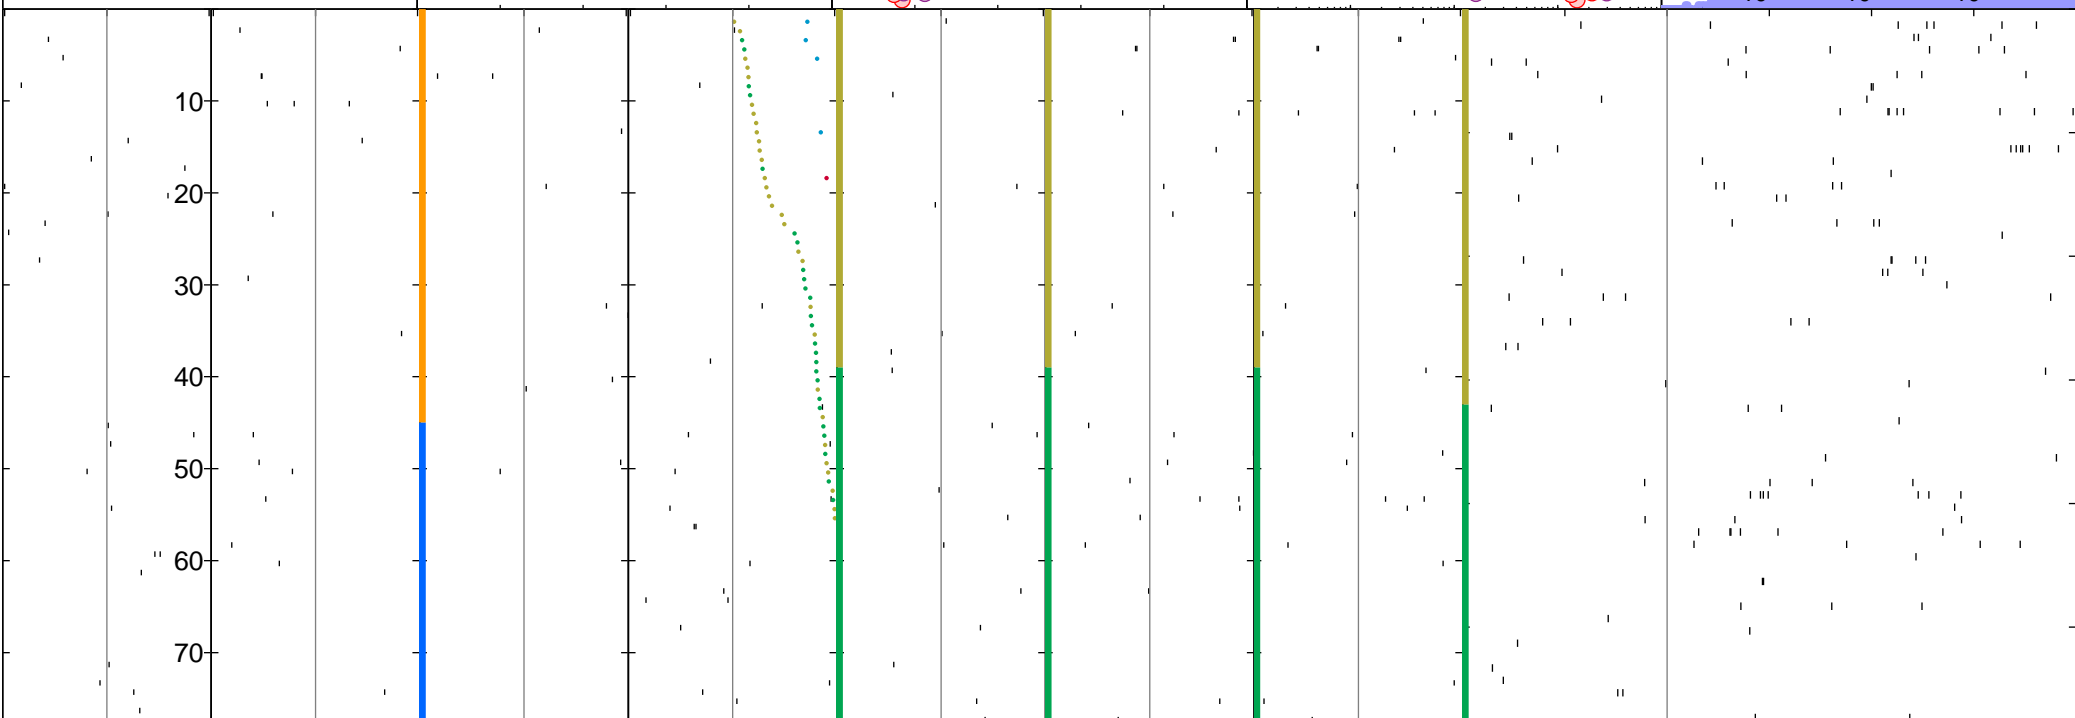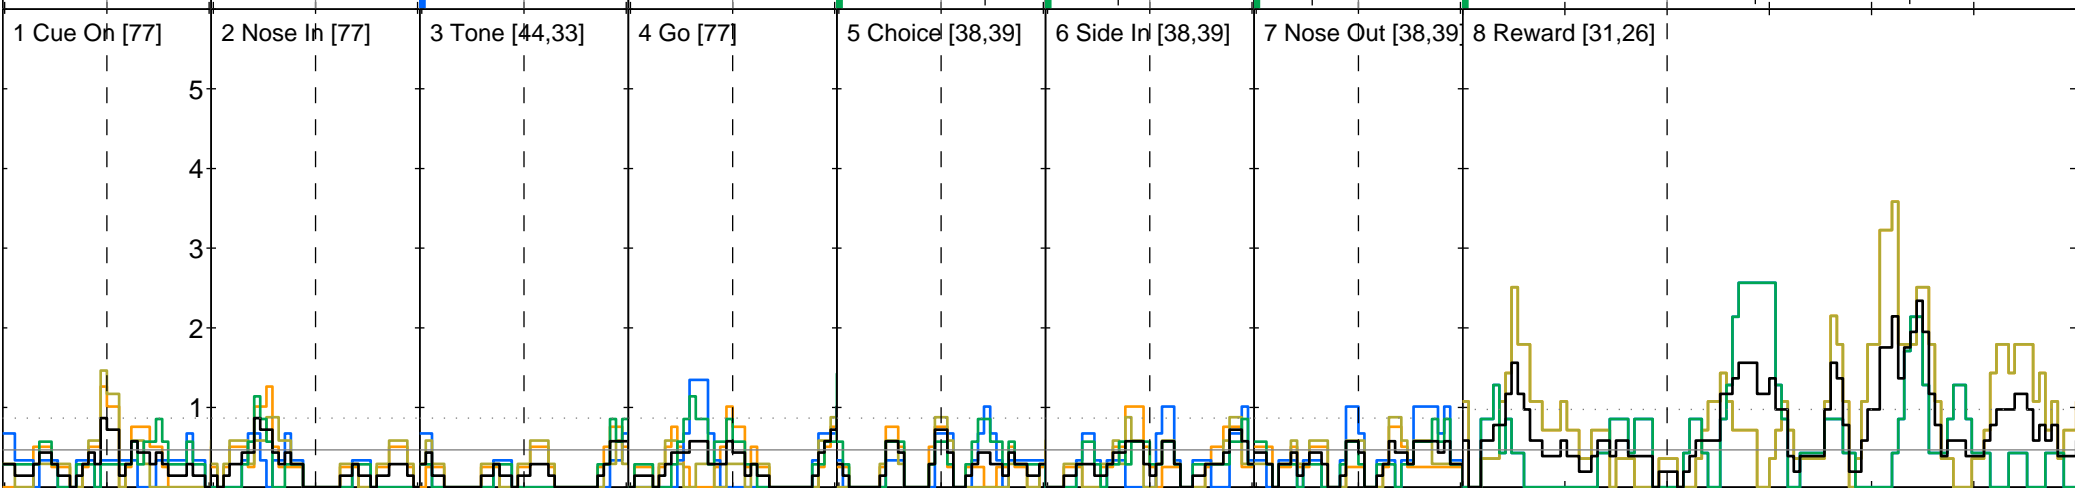



**Cell: C1220071117T03a**

AP: 3.2 ML: 2.6 DV: 2.6  
w: 3 n: 2419  $P_{ISI>2}$ : 0.95  
1/2pw: 218 $\mu$ s p->v: 659 $\mu$ s  
 $\beta_T$ : NaN  $\beta_D$ : NaN  
 $\beta_P$ : NaN SI: NaN  
Session FR: 0.236 Hz  
Pk Ev: None  
Pk FR: --

M1<sub>p</sub>

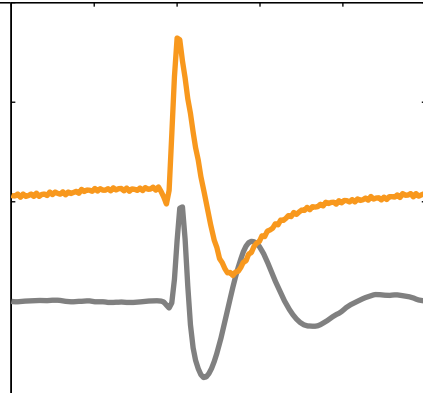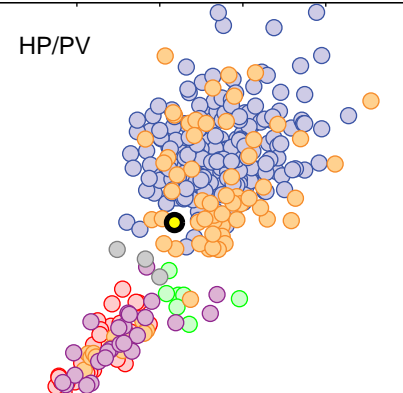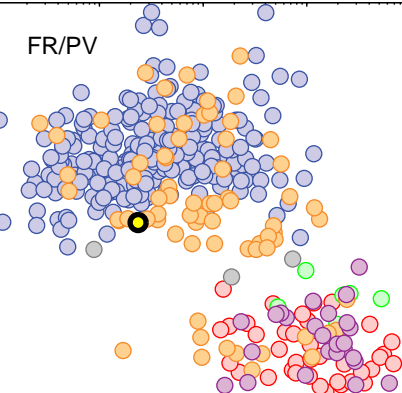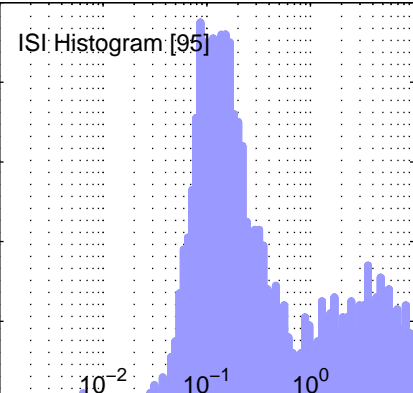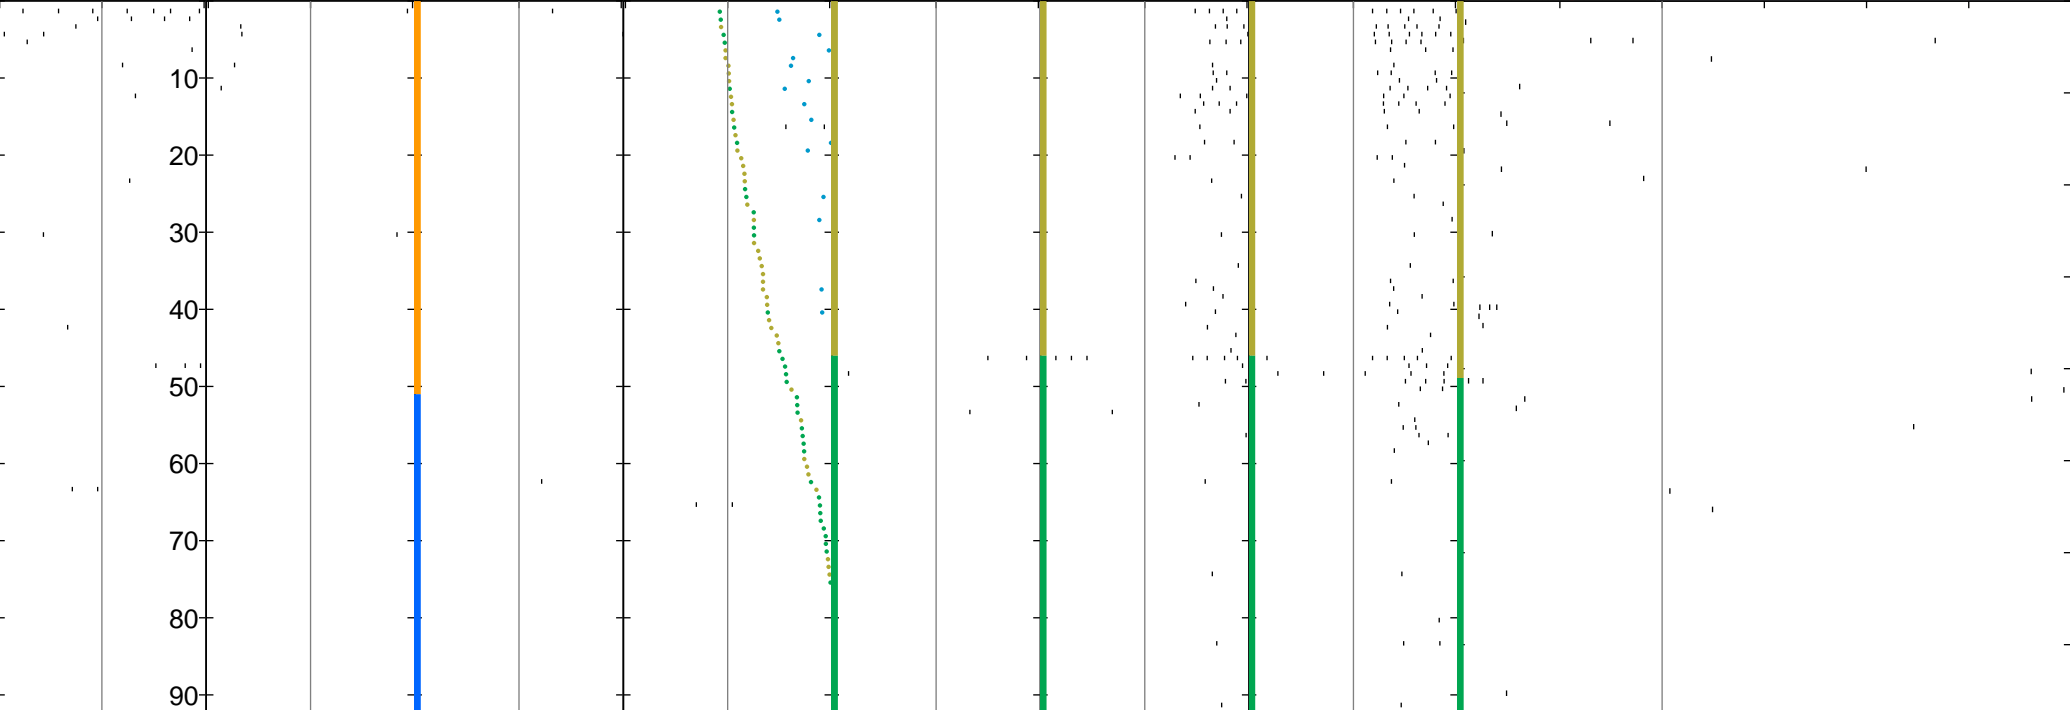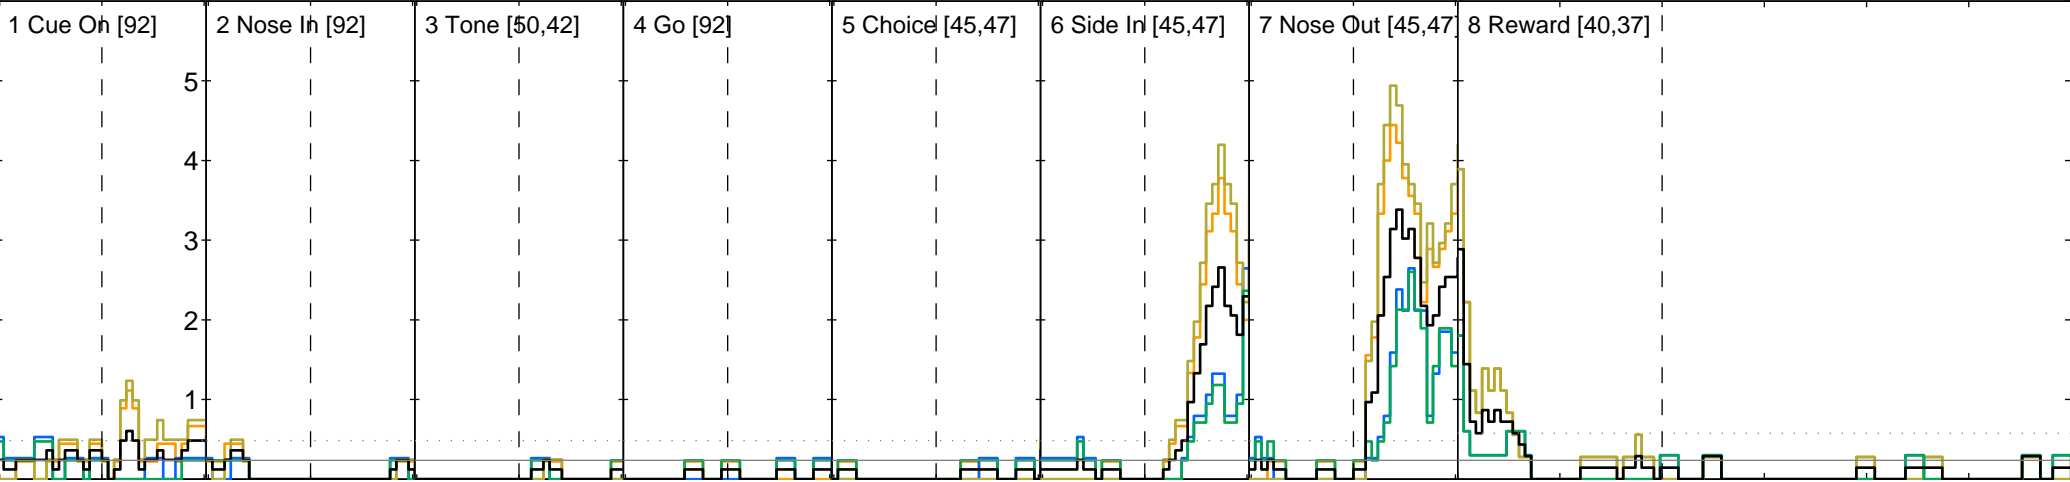

**Cell: C1220071117T03c**

AP: 3.2 ML: 2.6 DV: 2.6  
w: 4 n: 8049  $P_{ISI>2}$ : 0.69  
1/2pw: 205 $\mu$ s p->v: 594 $\mu$ s  
 $\beta_T$ : NaN  $\beta_D$ : NaN  
 $\beta_P$ : NaN SI: NaN  
Session FR: 0.785 Hz  
Pk Ev: None  
Pk FR: --

M1<sub>P</sub>

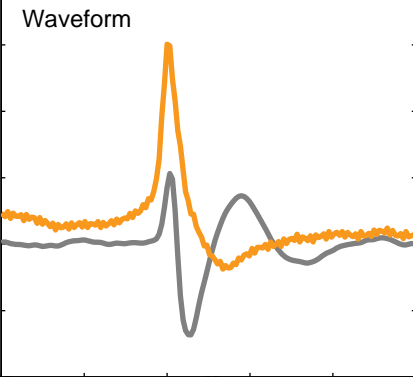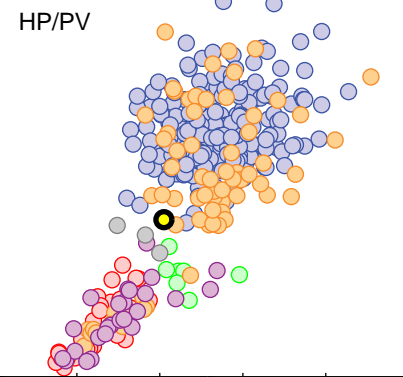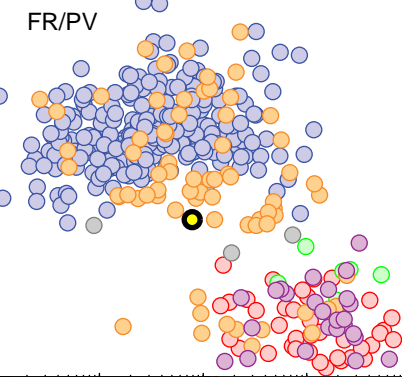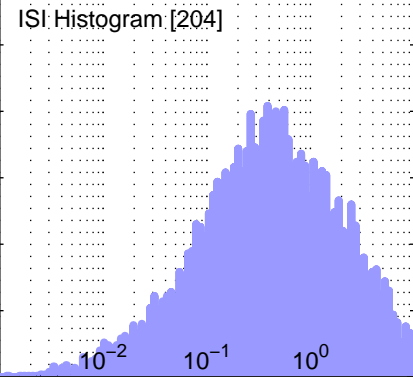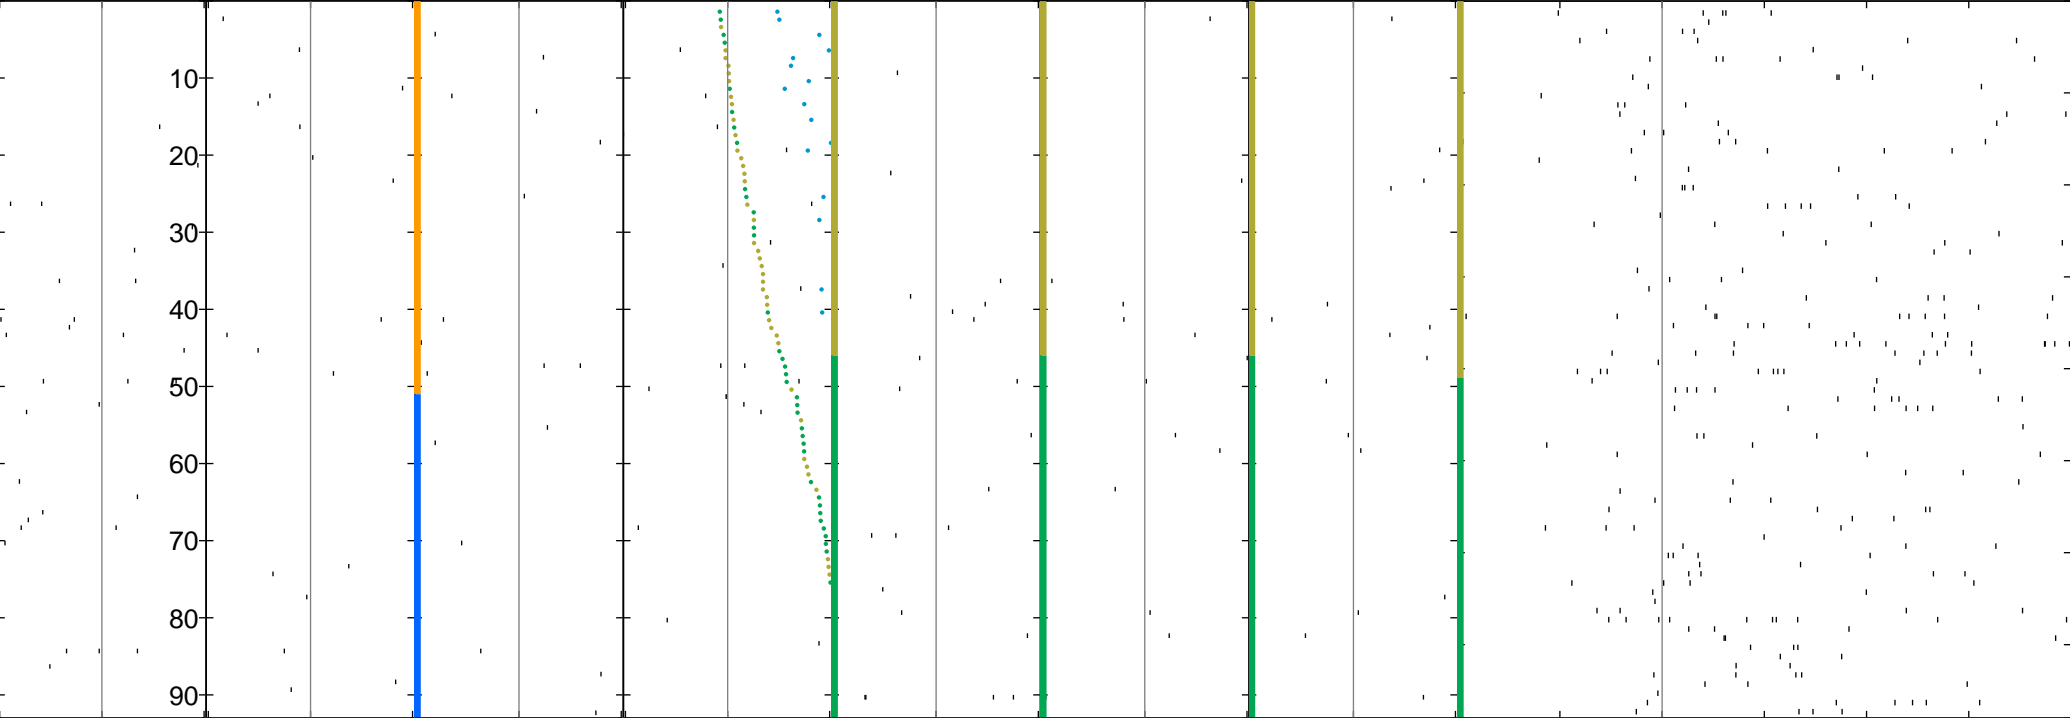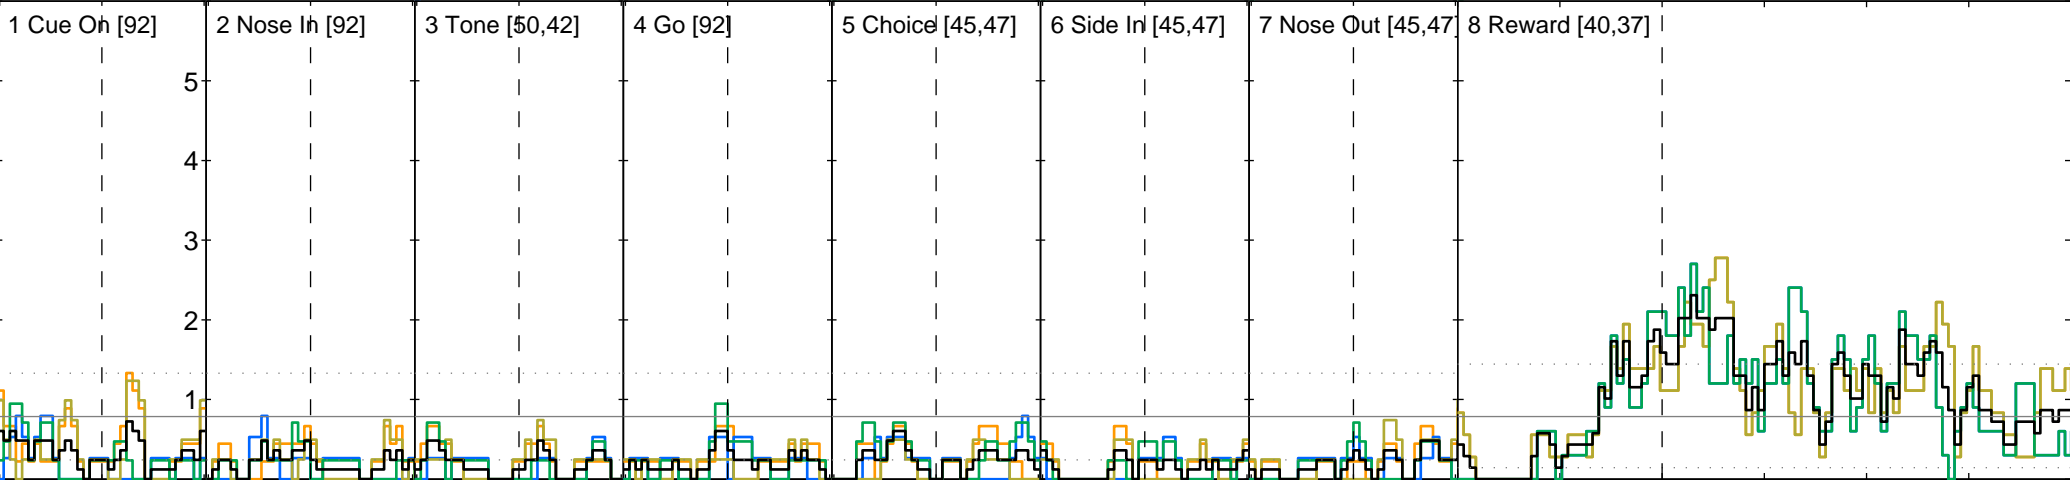

**Cell: C1220071117T03d**

AP: 3.2 ML: 2.6 DV: 2.6  
w: 4 n: 236  $P_{ISI>2}$ : 1  
1/2pw: 235 $\mu$ s p->v: 971 $\mu$ s  
 $\beta_T$ : NaN  $\beta_D$ : NaN  
 $\beta_P$ : NaN SI: NaN  
Session FR: 0.0266 Hz  
Pk Ev: None  
Pk FR: --

M1<sub>P</sub>

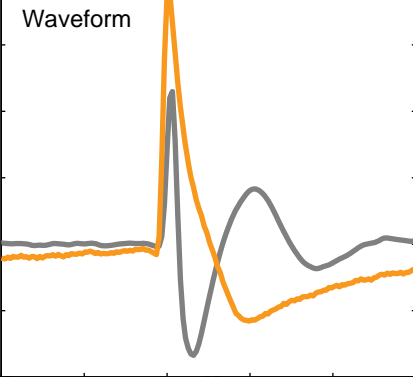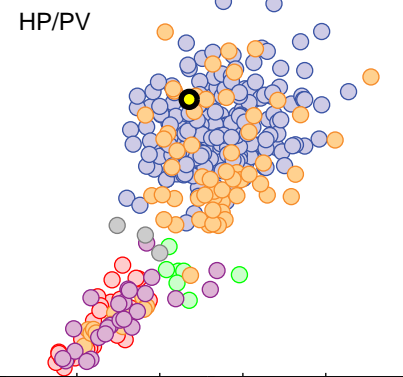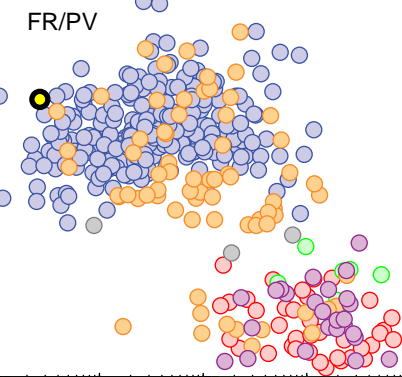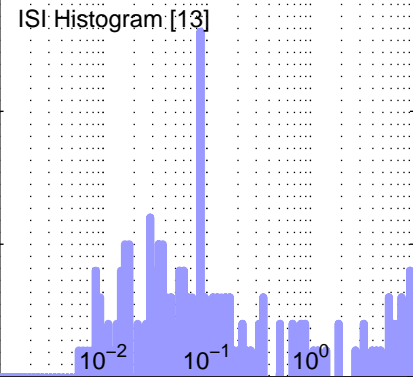

10  
20  
30  
40  
50  
60  
70  
80  
90

1 Cue On [92] 2 Nose In [92] 3 Tone [50,42] 4 Go [92] 5 Choice [45,47] 6 Side In [45,47] 7 Nose Out [45,47] 8 Reward [40,37]

5  
4  
3  
2  
1

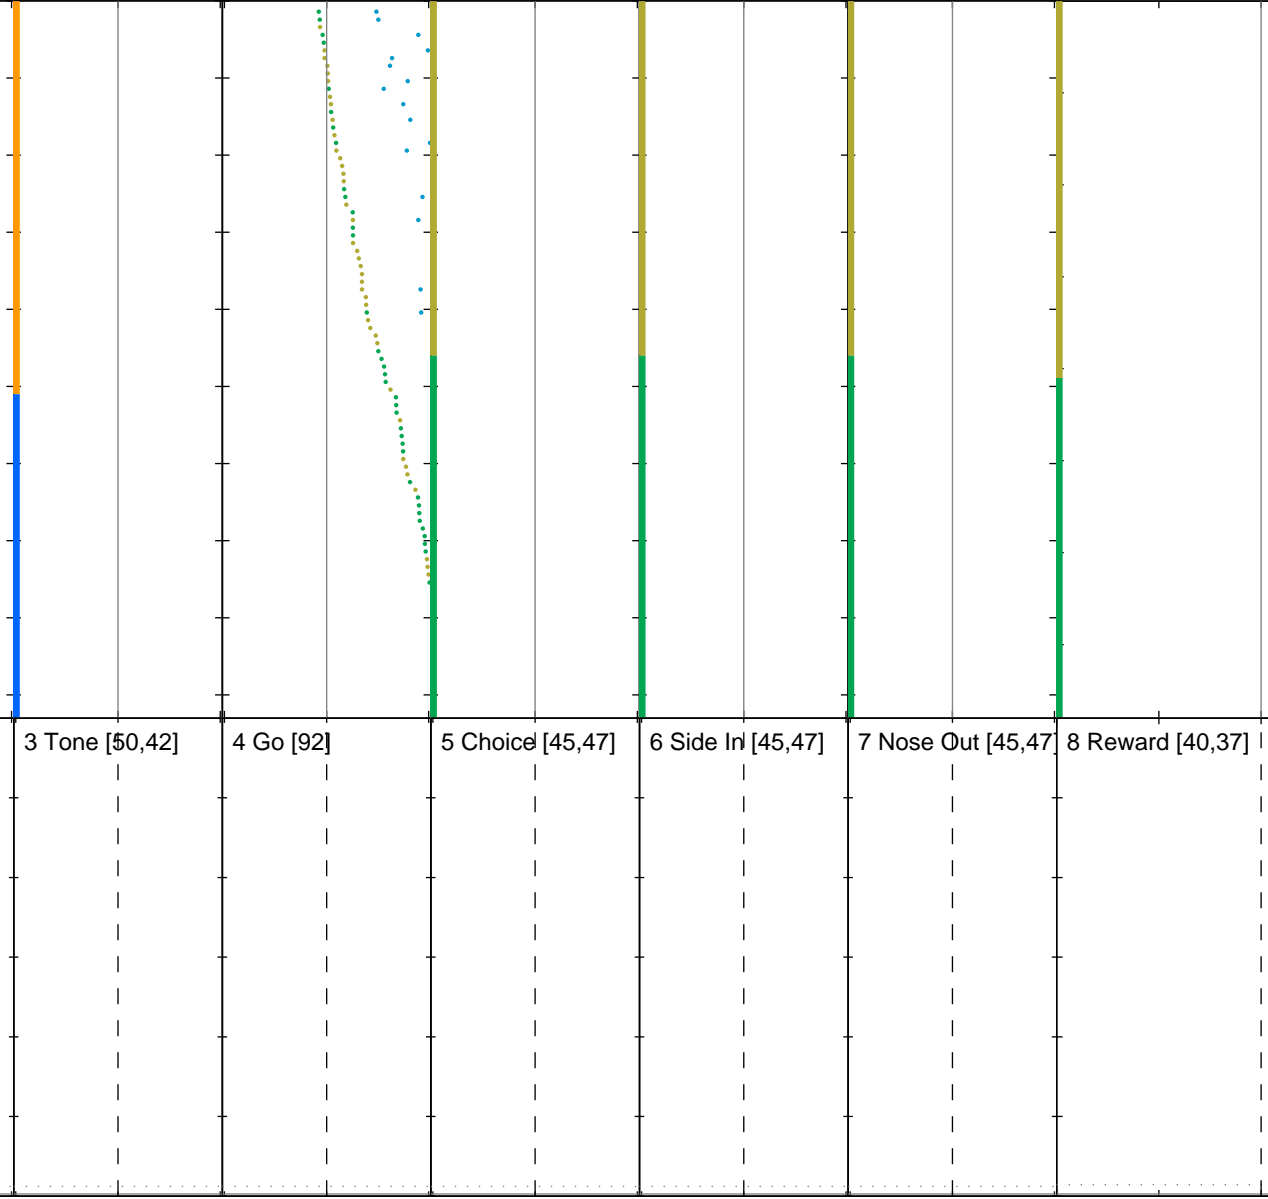

**Cell: C0420070301T02a**

AP: 3.7 ML: 2.8 DV: 3  
w: 1 n: 379  $P_{ISI>2}$ : 0.98  
1/2pw: 243 $\mu$ s p->v: 981 $\mu$ s  
 $\beta_T$ : NaN  $\beta_D$ : NaN  
 $\beta_P$ : NaN SI: NaN  
Session FR: 0.104 Hz  
Pk Ev: None  
Pk FR: --

M1<sub>P</sub>

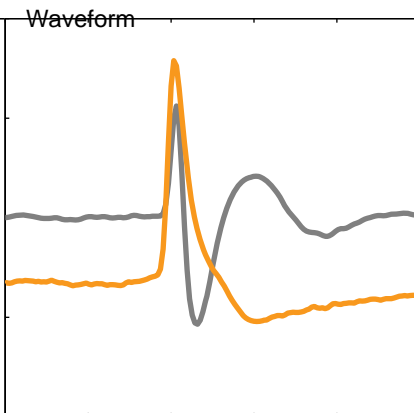

HP/PV

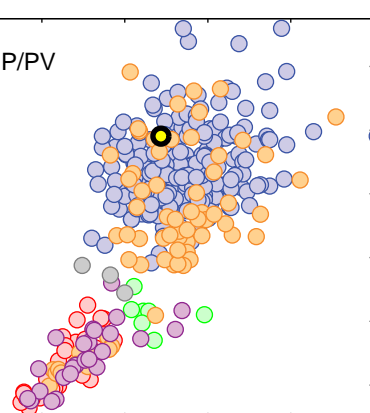

FR/PV

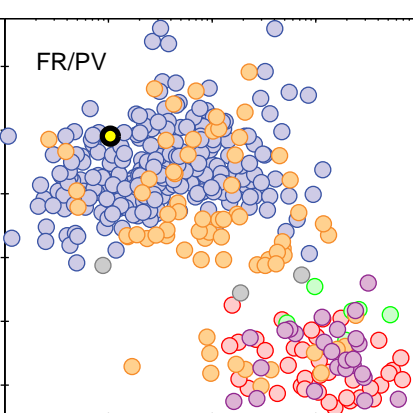

ISI Histogram [11]

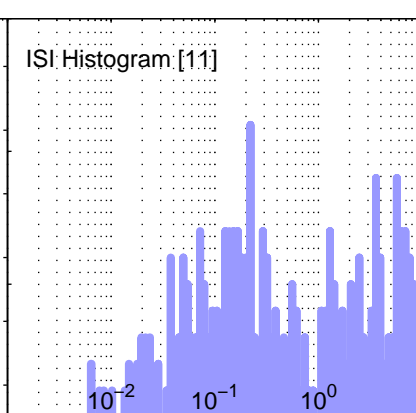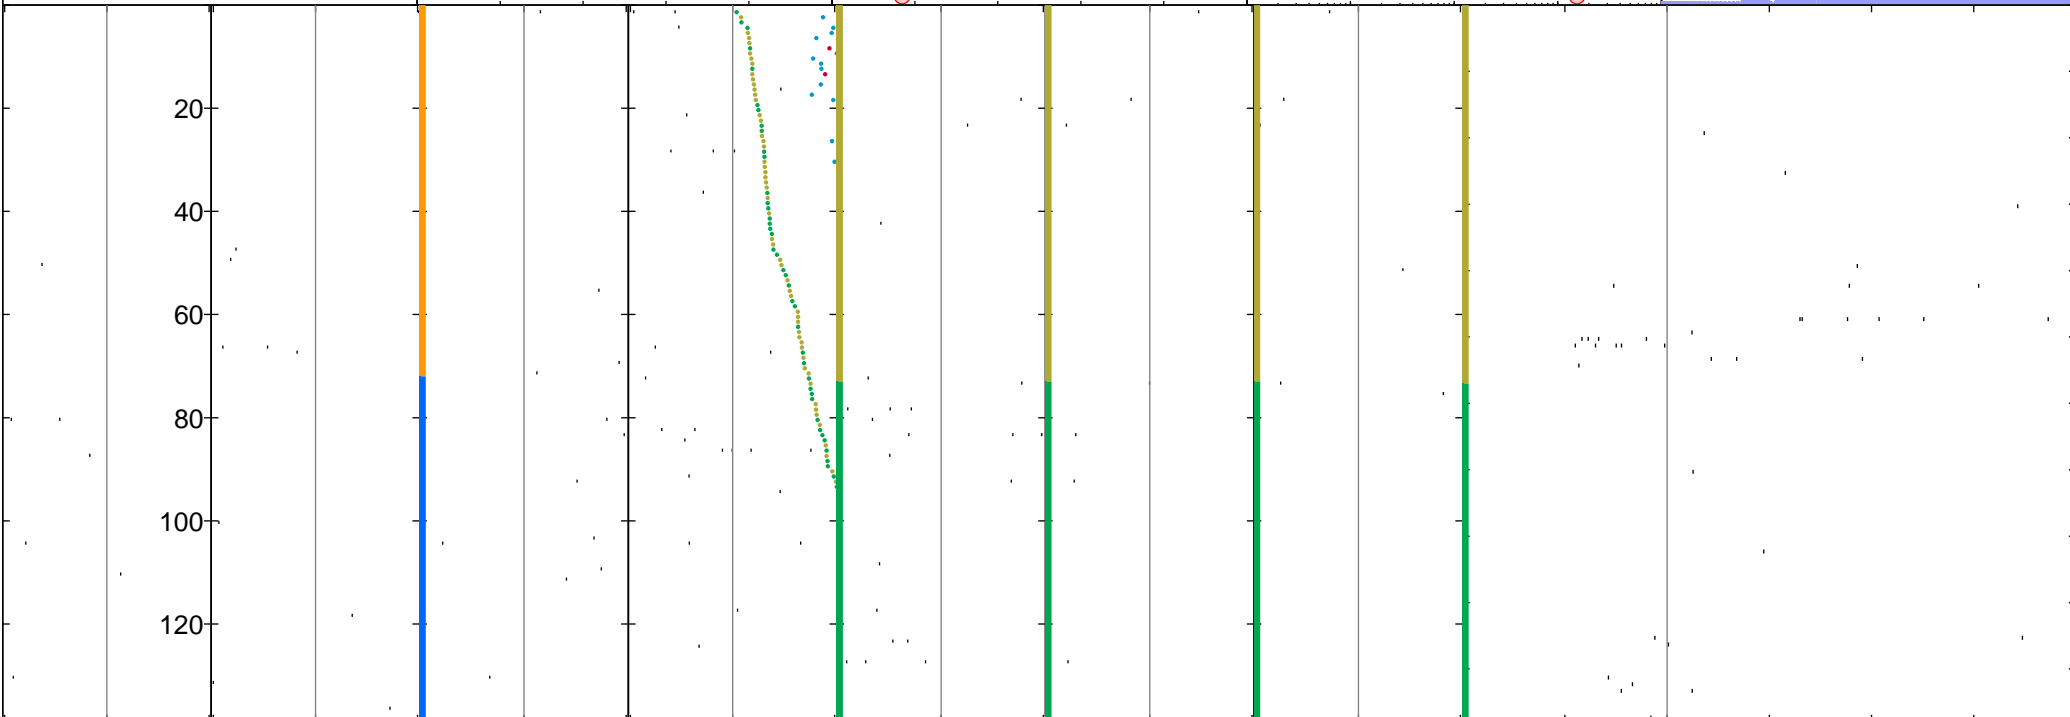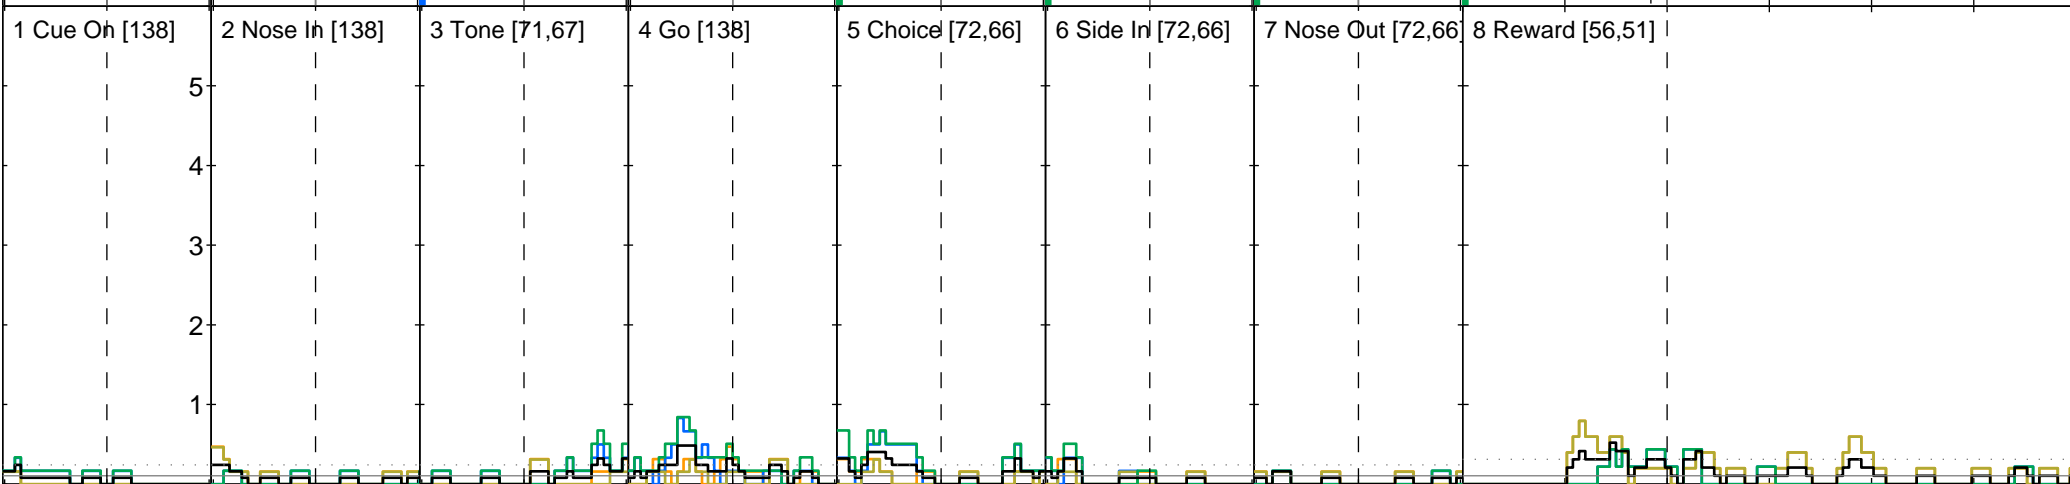

Cell: C0420070301T02b

AP: 3.7 ML: 2.8 DV: 3  
w: 4 n: 155  $P_{ISI>2}$ : 0.99  
1/2pw: 221 $\mu$ s p->v: 810 $\mu$ s  
 $\beta_T$ : NaN  $\beta_D$ : NaN  
 $\beta_P$ : NaN SI: NaN  
Session FR: 0.0495 Hz  
Pk Ev: None  
Pk FR: --

M1<sub>P</sub>

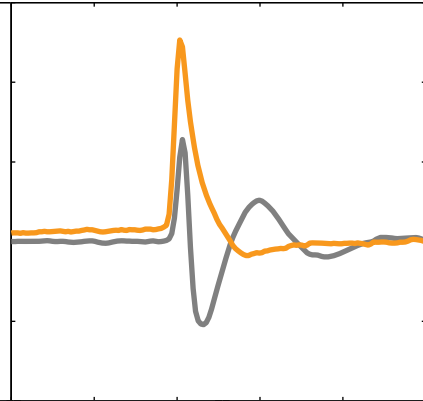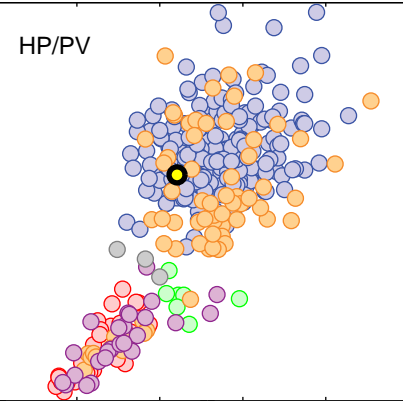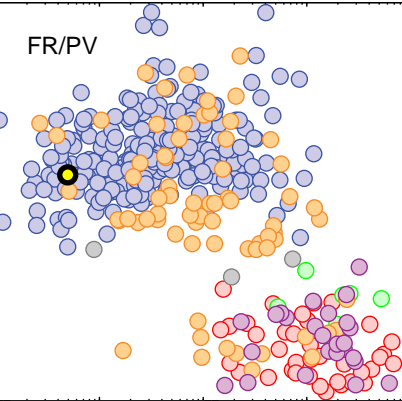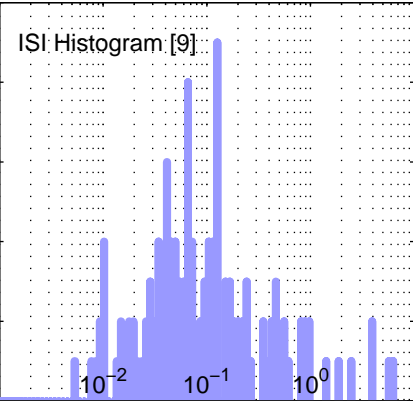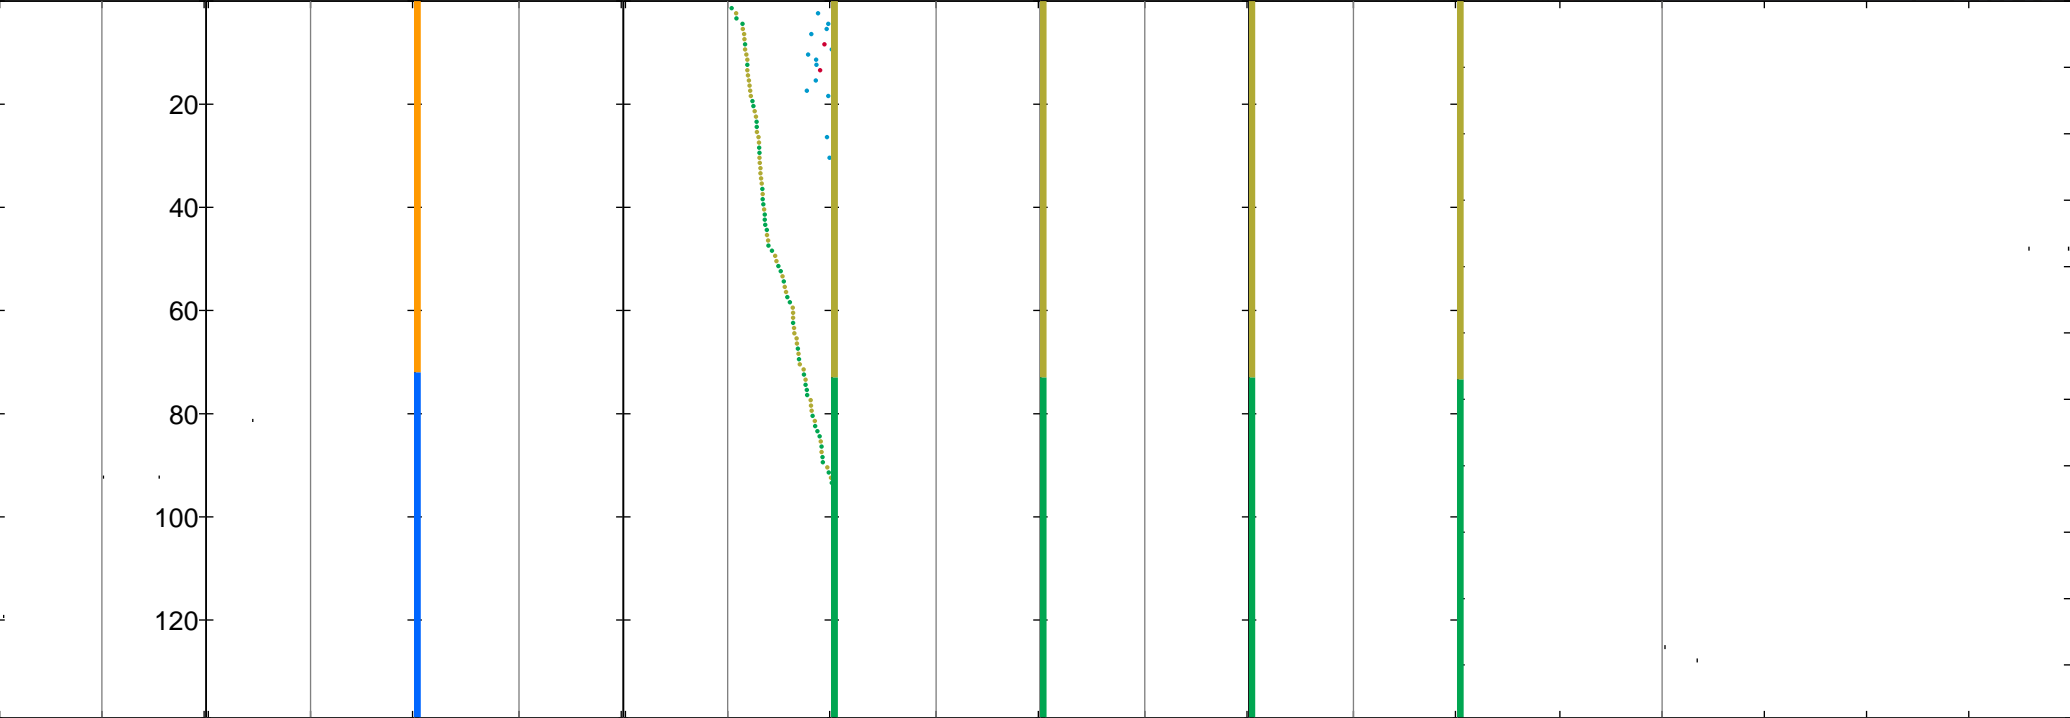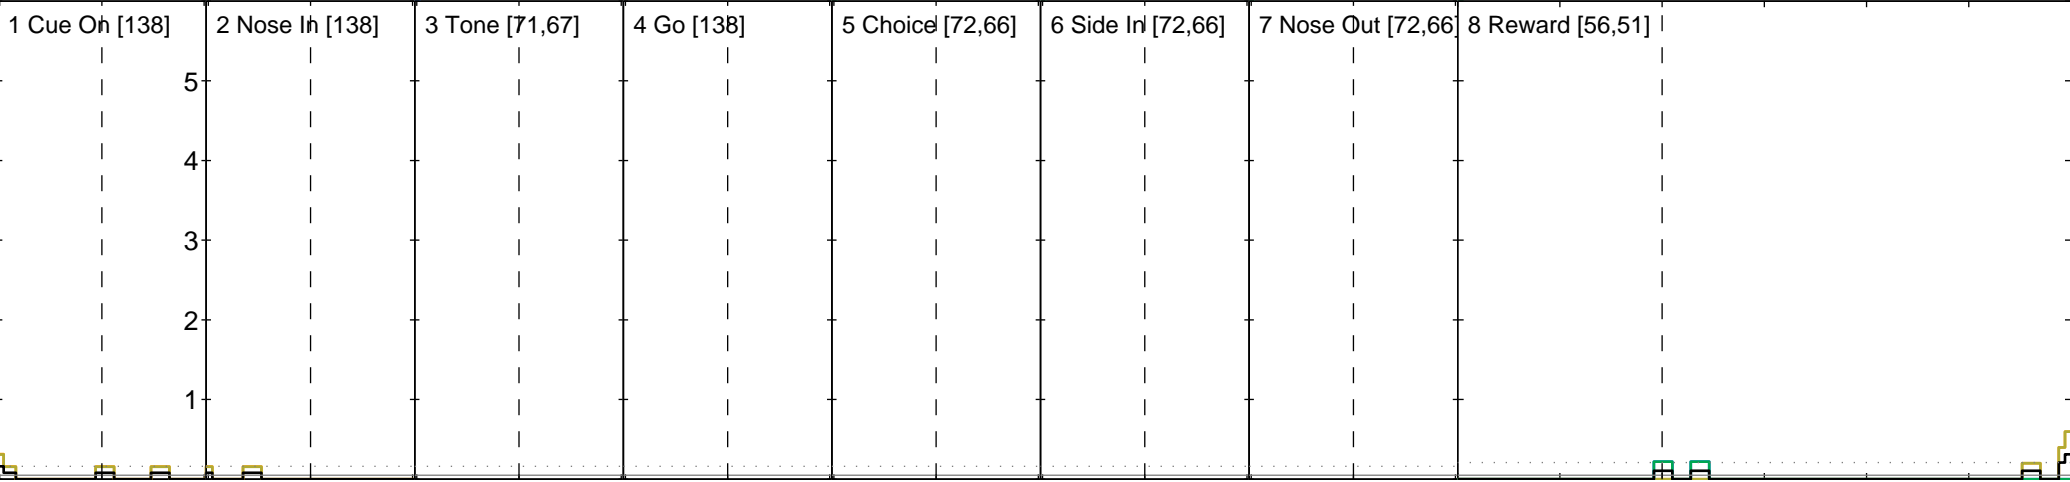

**Cell: C0420070314T02c**

AP: 3.7 ML: 2.8 DV: 3.3  
w: 1 n: 285  $P_{ISI>2}$ : 0.99  
1/2pw: 242 $\mu$ s p->v: 933 $\mu$ s  
 $\beta_T$ : NaN  $\beta_D$ : NaN  
 $\beta_P$ : NaN SI: NaN  
Session FR: 0.0389 Hz  
Pk Ev: None  
Pk FR: --

M1<sub>P</sub>

Waveform

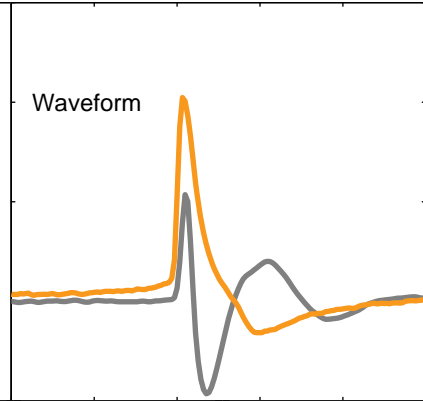

HP/PV

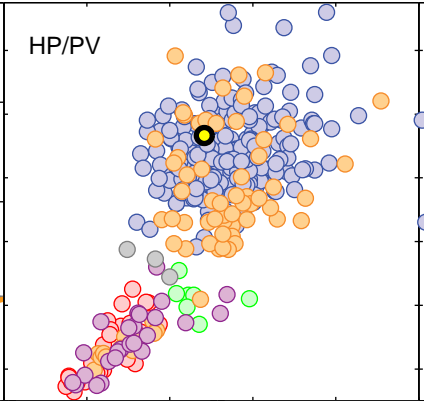

FR/PV

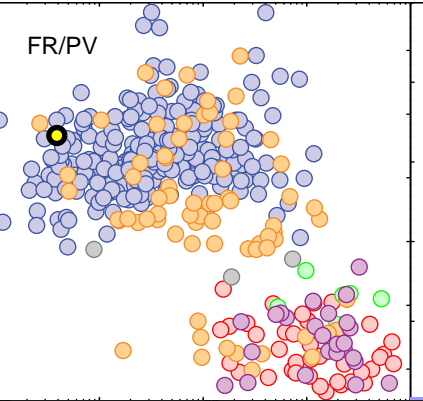

ISI Histogram [8]

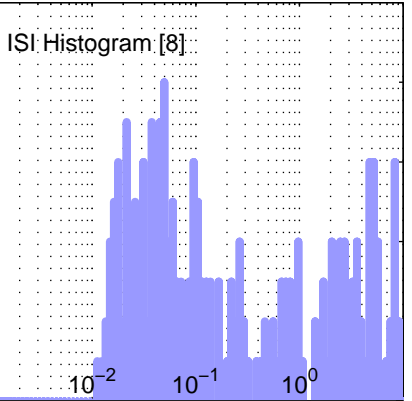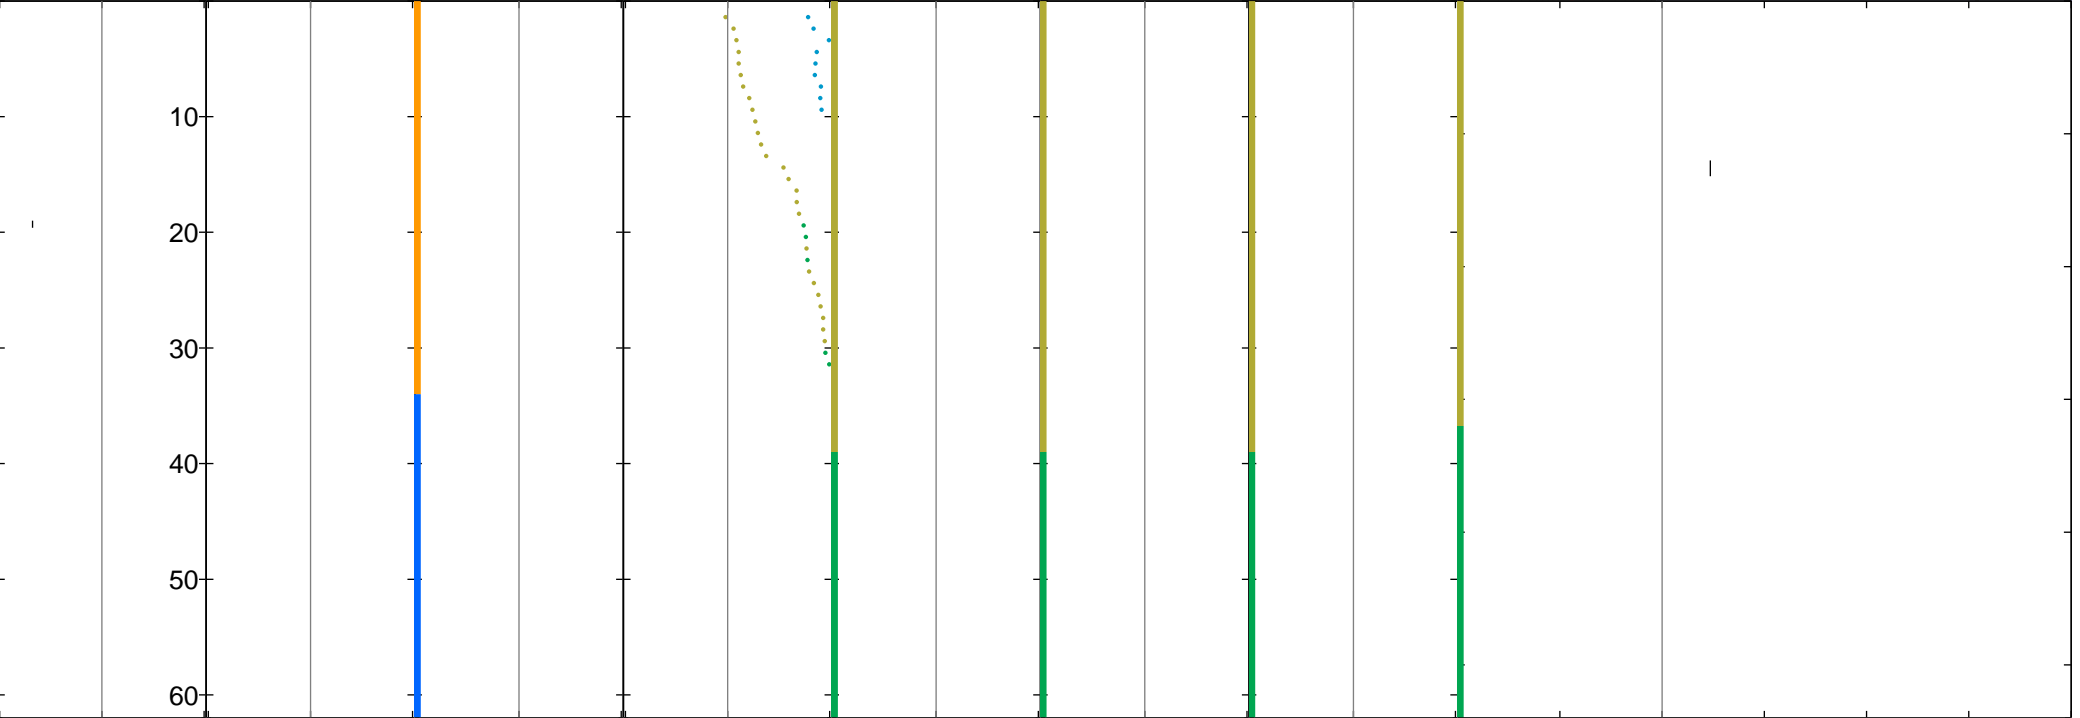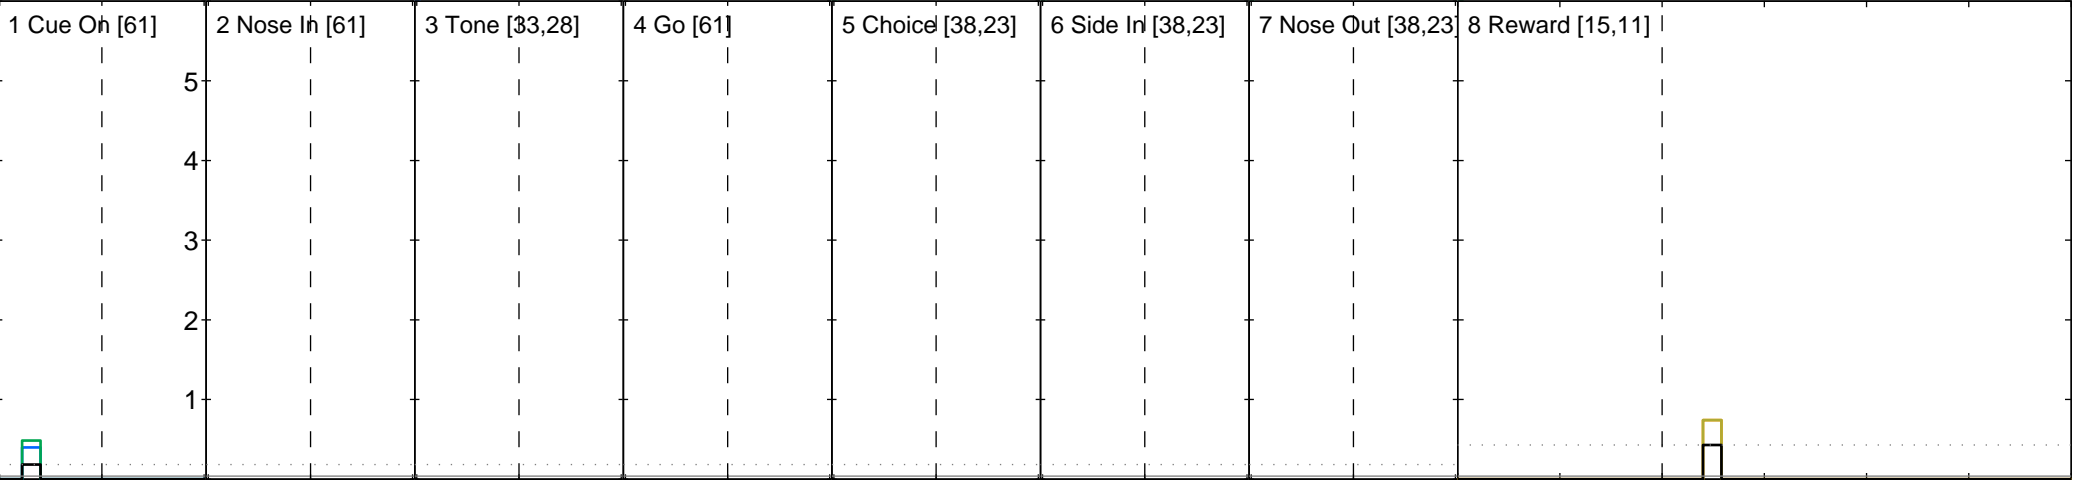

**Cell: C0420070314T02g**

AP: 3.7 ML: 2.8 DV: 3.3  
w: 1 n: 1814  $P_{ISI>2}$ : 0.93  
1/2pw: 205 $\mu$ s p->v: 846 $\mu$ s  
 $\beta_T$ : NaN  $\beta_D$ : NaN  
 $\beta_P$ : NaN SI: NaN  
Session FR: 0.246 Hz  
Pk Ev: None  
Pk FR: --

M1<sub>P</sub>

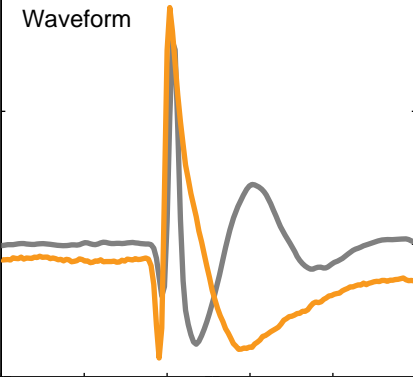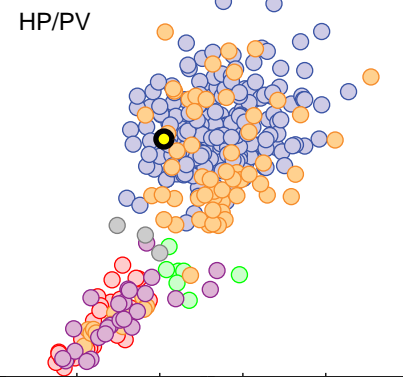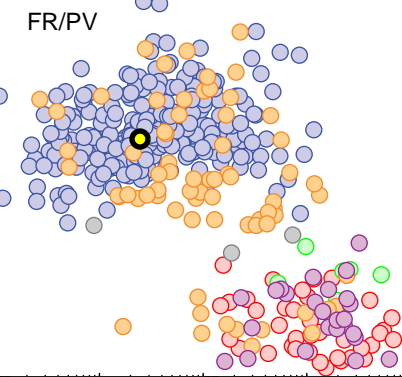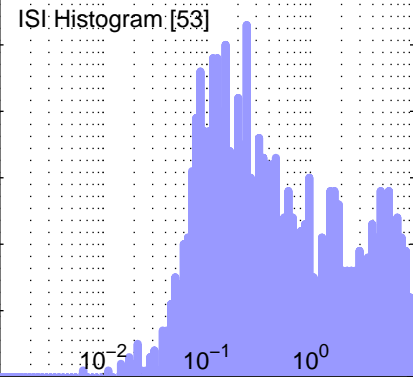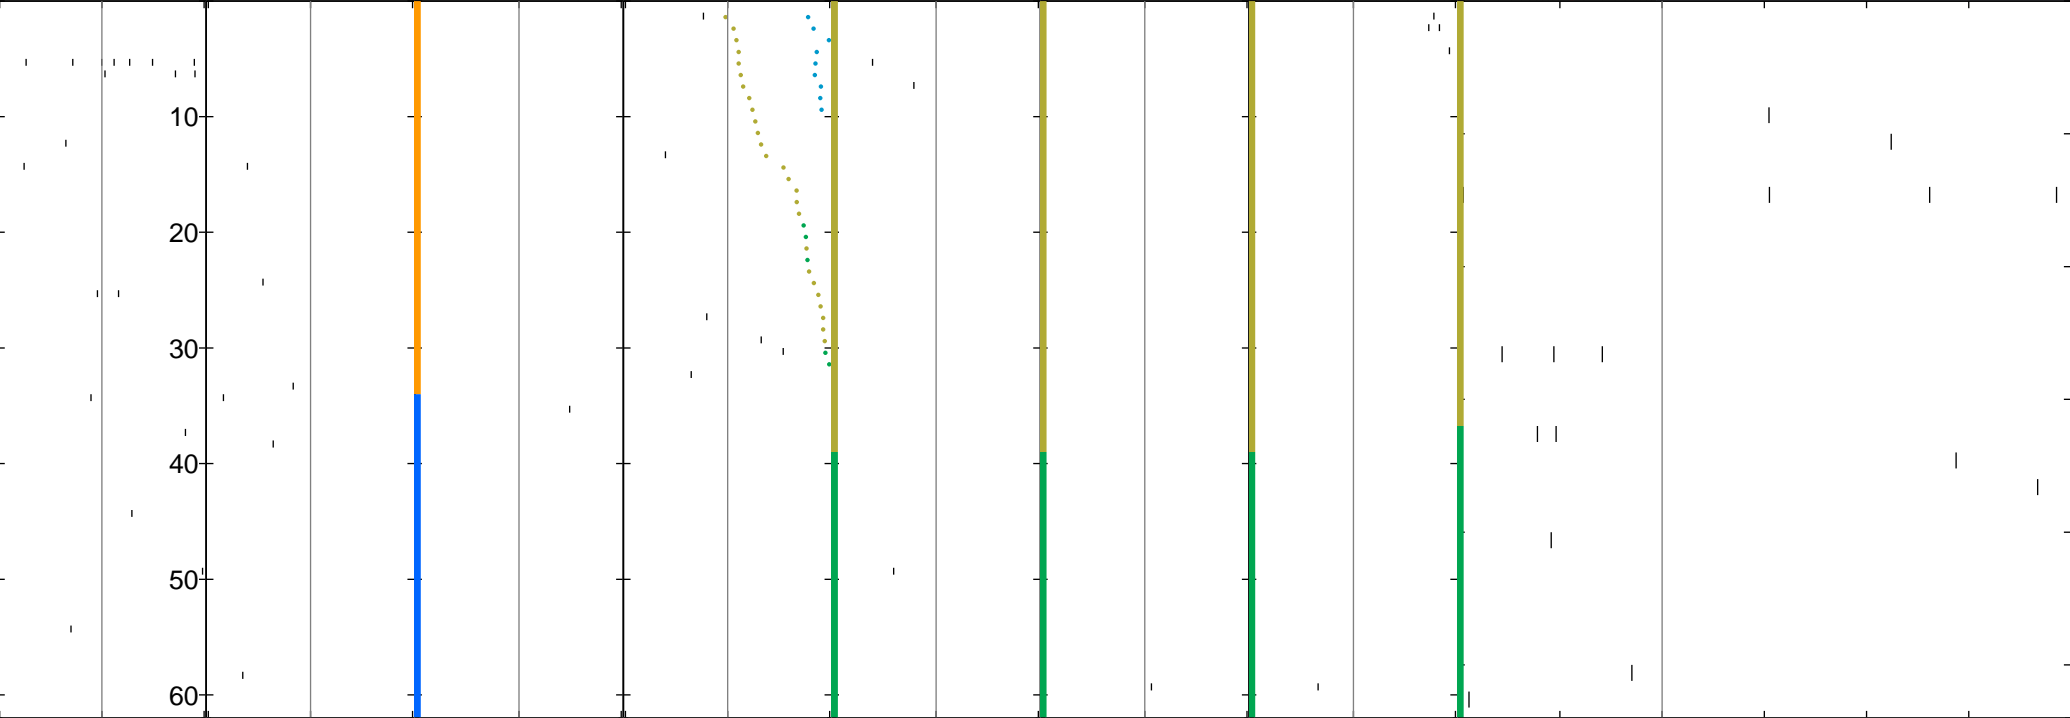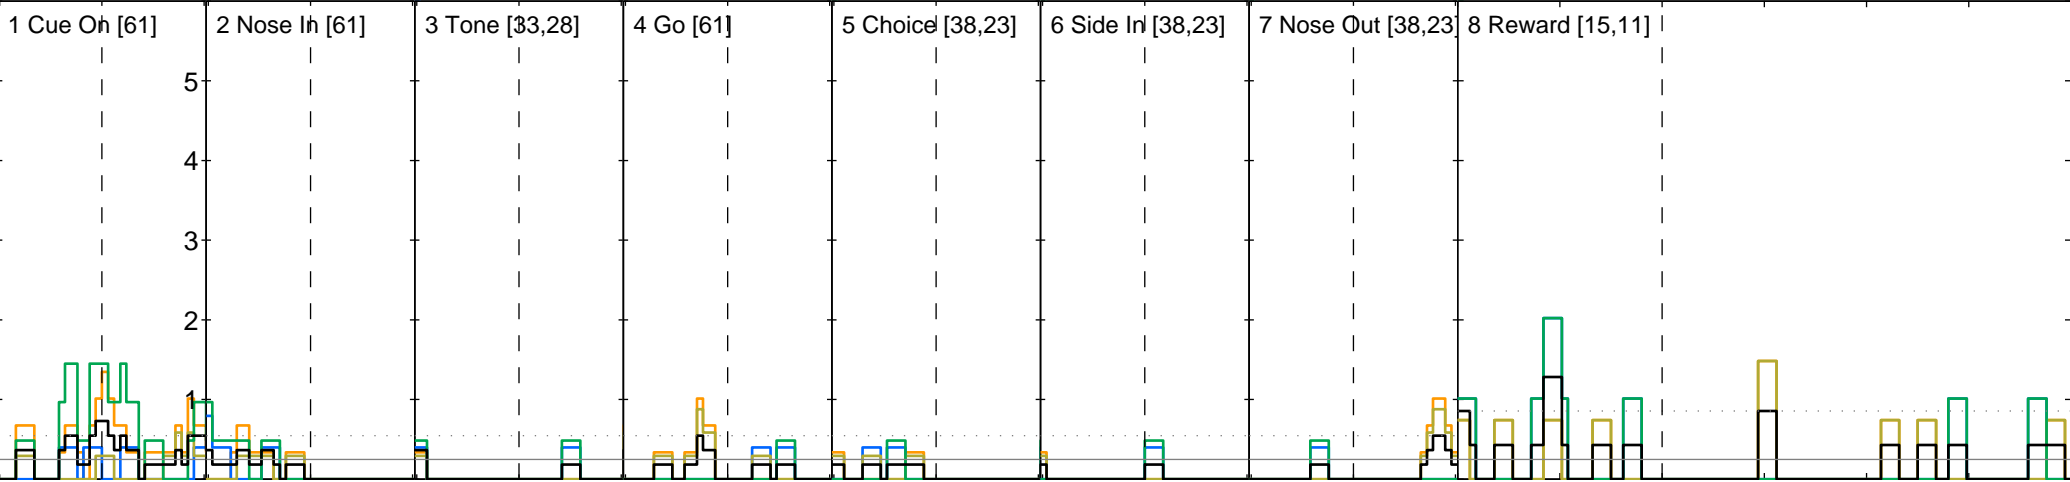

Cell: C0420070314T02i

AP: 3.7 ML: 2.8 DV: 3.3

w: 2 n: 4898  $P_{ISI>2}$ : 0.82

1/2pw: 256 $\mu$ s p->v: 971 $\mu$ s

$\beta_T$ : NaN  $\beta_D$ : NaN

$\beta_P$ : NaN SI: NaN

Session FR: 0.66 Hz

Pk Ev: None

Pk FR: --

M1<sub>p</sub>

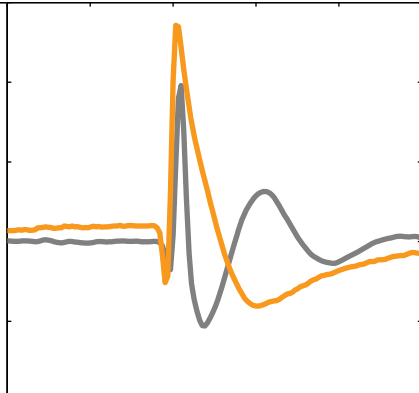

HP/PV

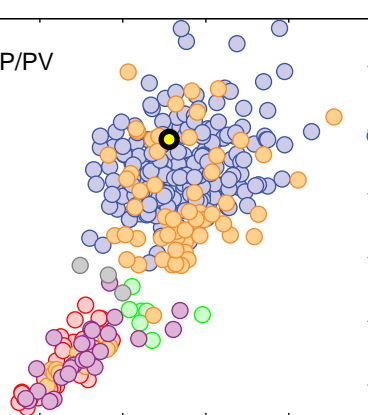

FR/PV

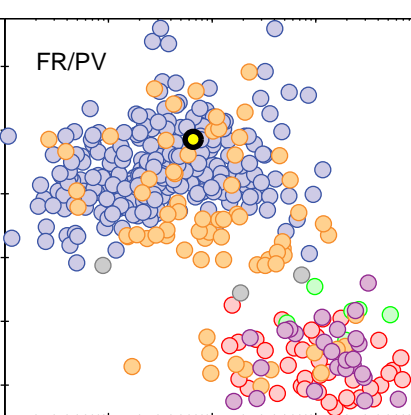

ISI Histogram [272]

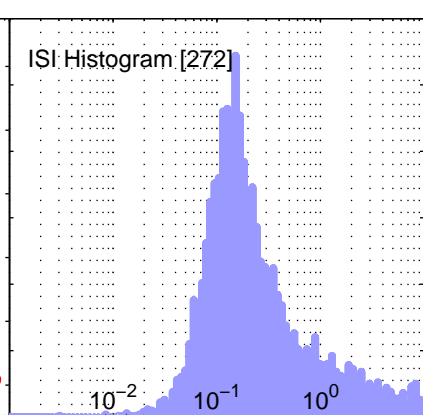

10

20

30

40

50

60

1 Cue On [61]

2 Nose In [61]

3 Tone [33,28]

4 Go [61]

5 Choice [38,23]

6 Side In [38,23]

7 Nose Out [38,23]

8 Reward [15,11]

5

4

3

2

1

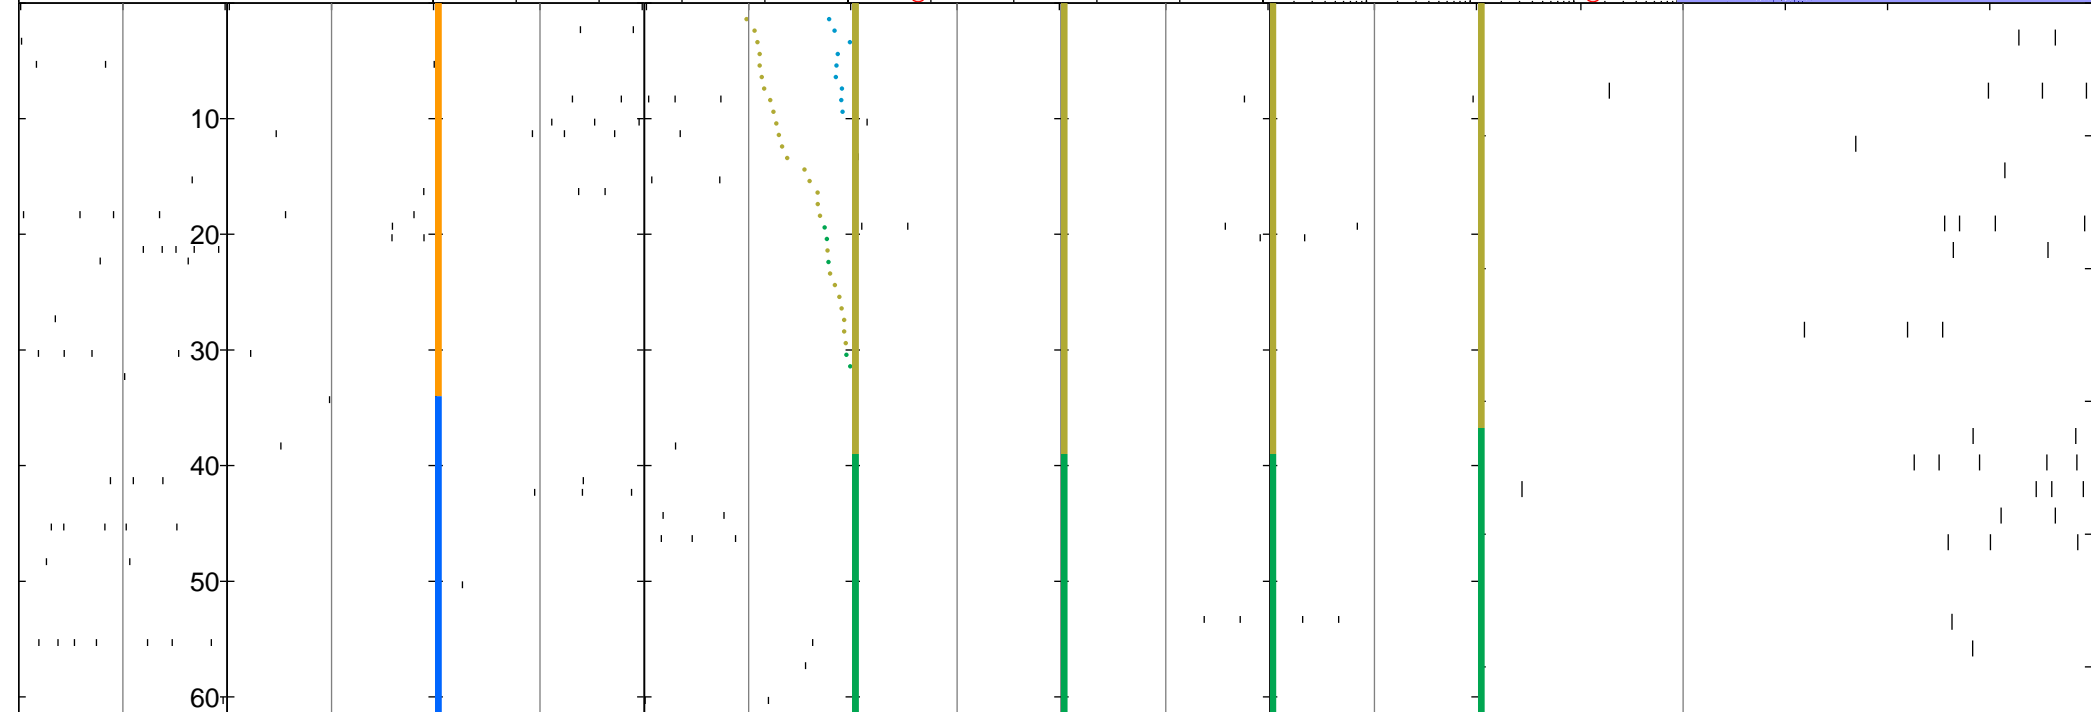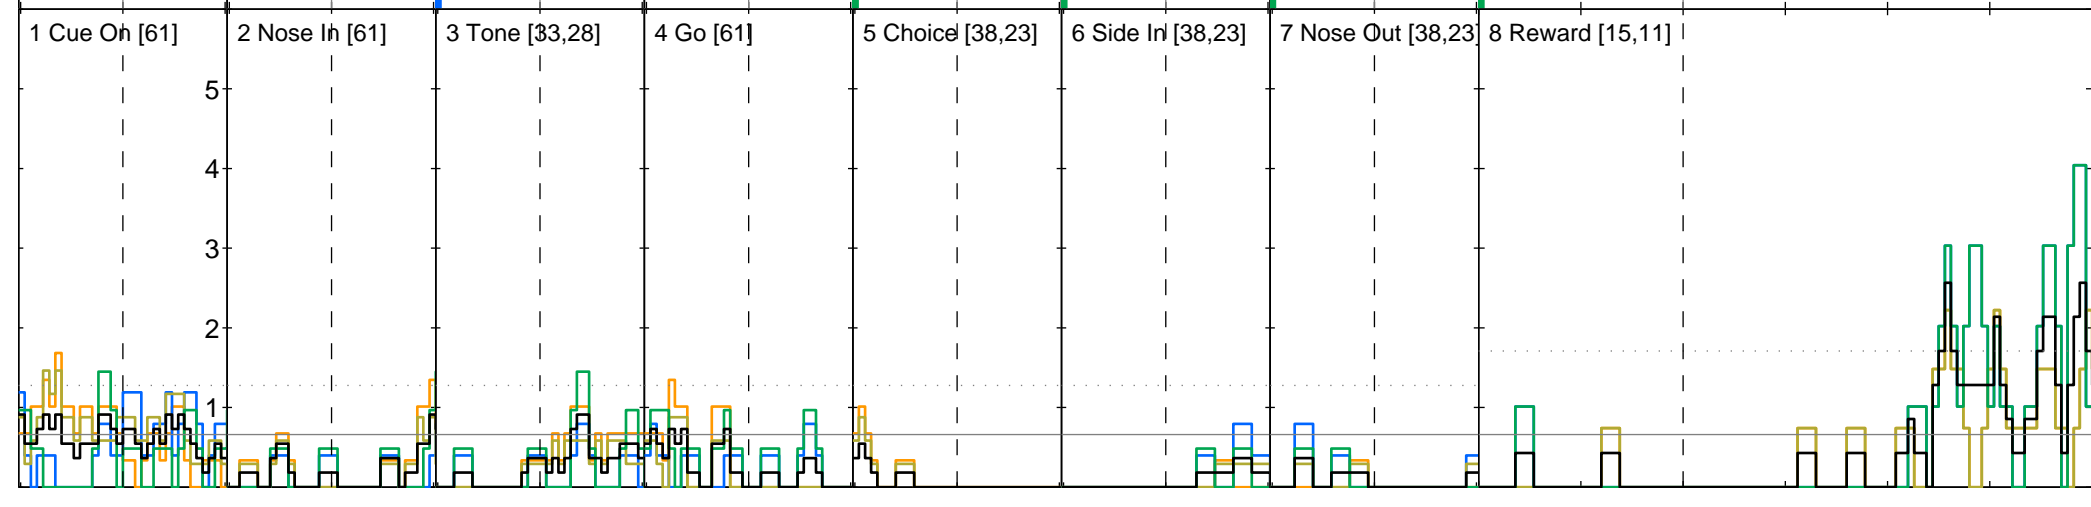



**Cell: C1220071027T01a**

AP: 4.2 ML: 3.6 DV: 1.8

w: 3 n: 4516  $P_{ISI>2}$ : 0.71/2pw: 266 $\mu$ s p->v: 683 $\mu$ s $\beta_T$ : NaN  $\beta_D$ : NaN $\beta_P$ : NaN SI: NaN

Session FR: 0.754 Hz

Pk Ev: None

Pk FR: --

M1<sub>P</sub>

Waveform

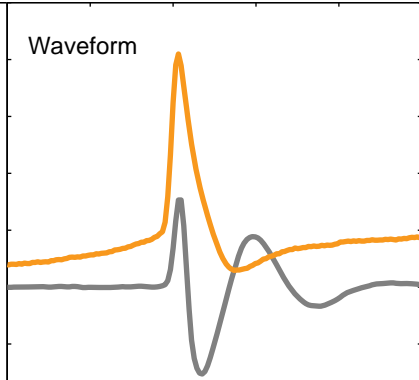

HP/PV

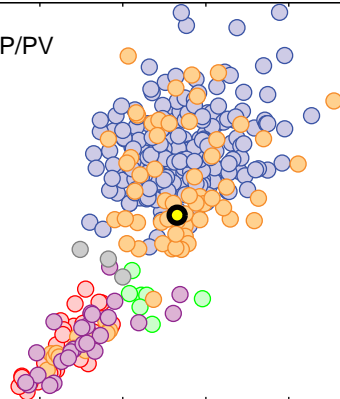

FR/PV

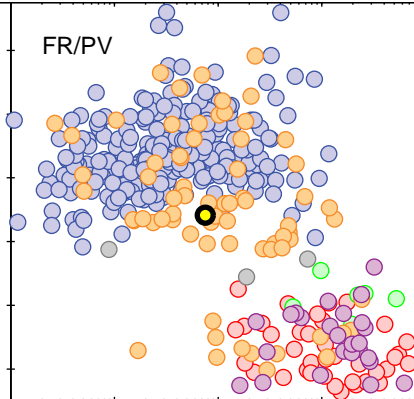

ISI Histogram [116]

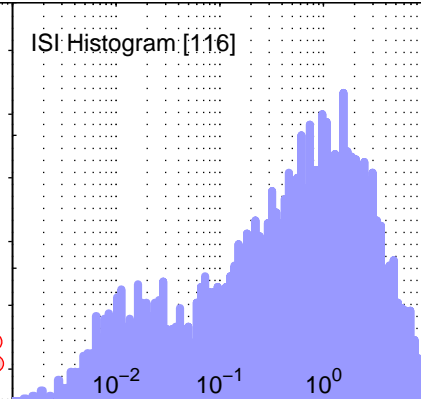

10

20

30

40

50

60

1 Cue On [64]

2 Nose In [64]

3 Tone [27,37]

4 Go [64]

5 Choice [23,41]

6 Side In [23,41]

7 Nose Out [23,41]

8 Reward [17,34]

5

4

3

2

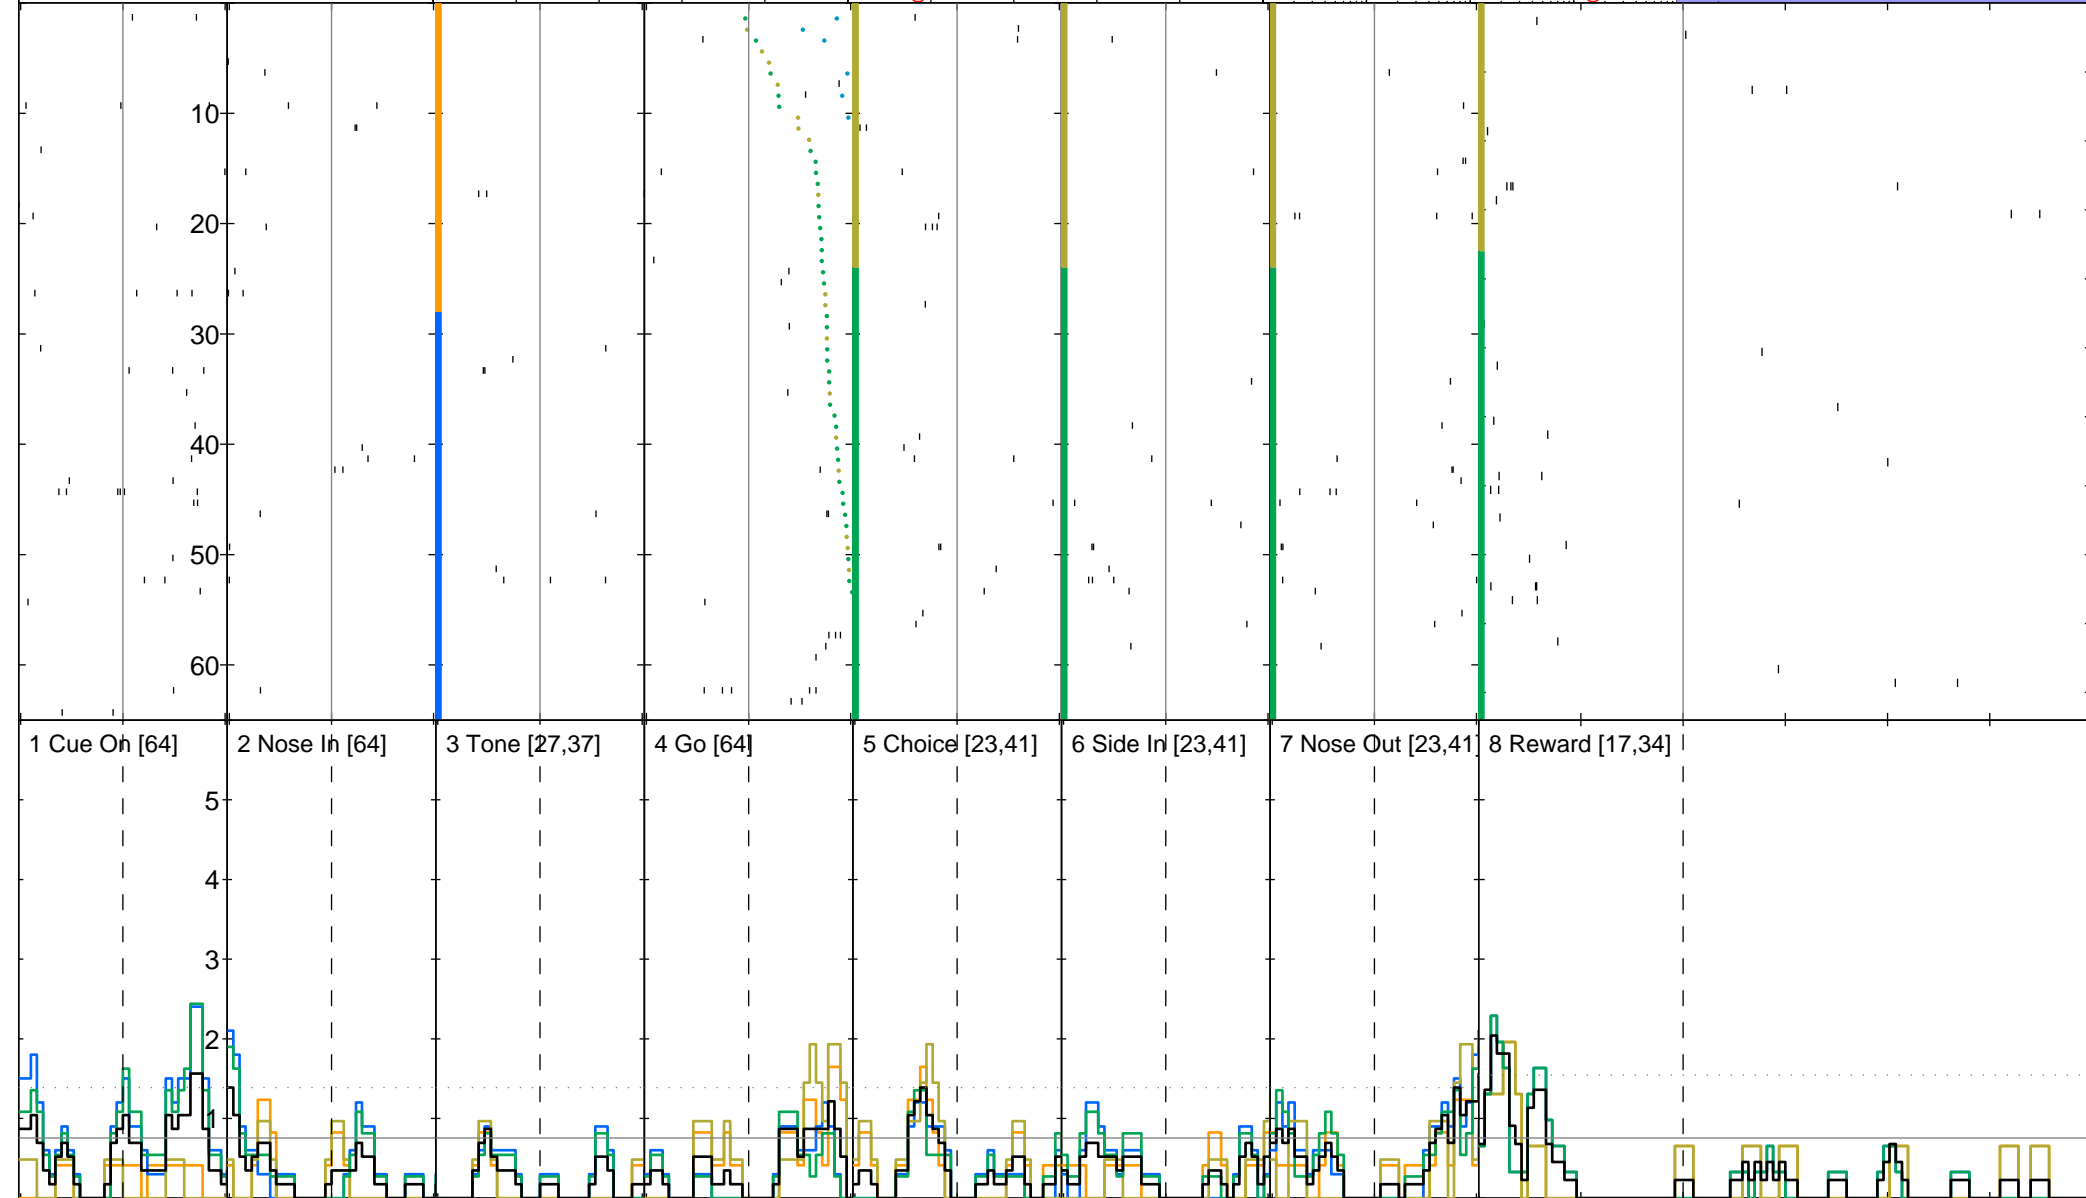

**Cell: C1220071027T01c**

AP: 4.2 ML: 3.6 DV: 1.8  
w: 3 n: 2190  $P_{ISI>2}$ : 0.87  
1/2pw: 275 $\mu$ s p->v: 686 $\mu$ s  
 $\beta_T$ : NaN  $\beta_D$ : NaN  
 $\beta_P$ : NaN SI: NaN  
Session FR: 0.366 Hz  
Pk Ev: None  
Pk FR: --

M1<sub>P</sub>

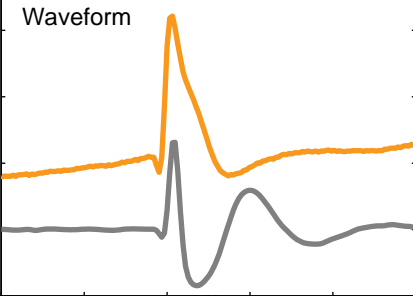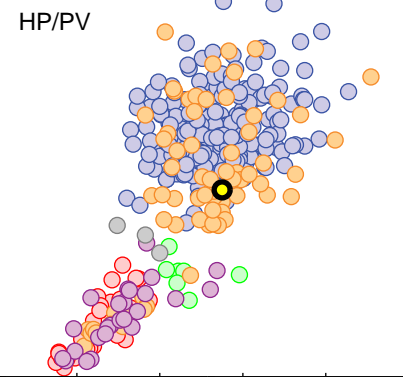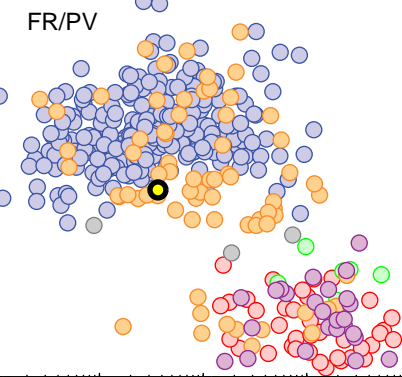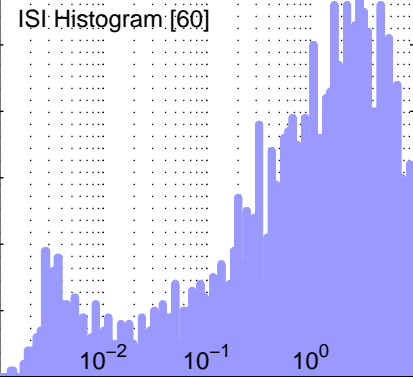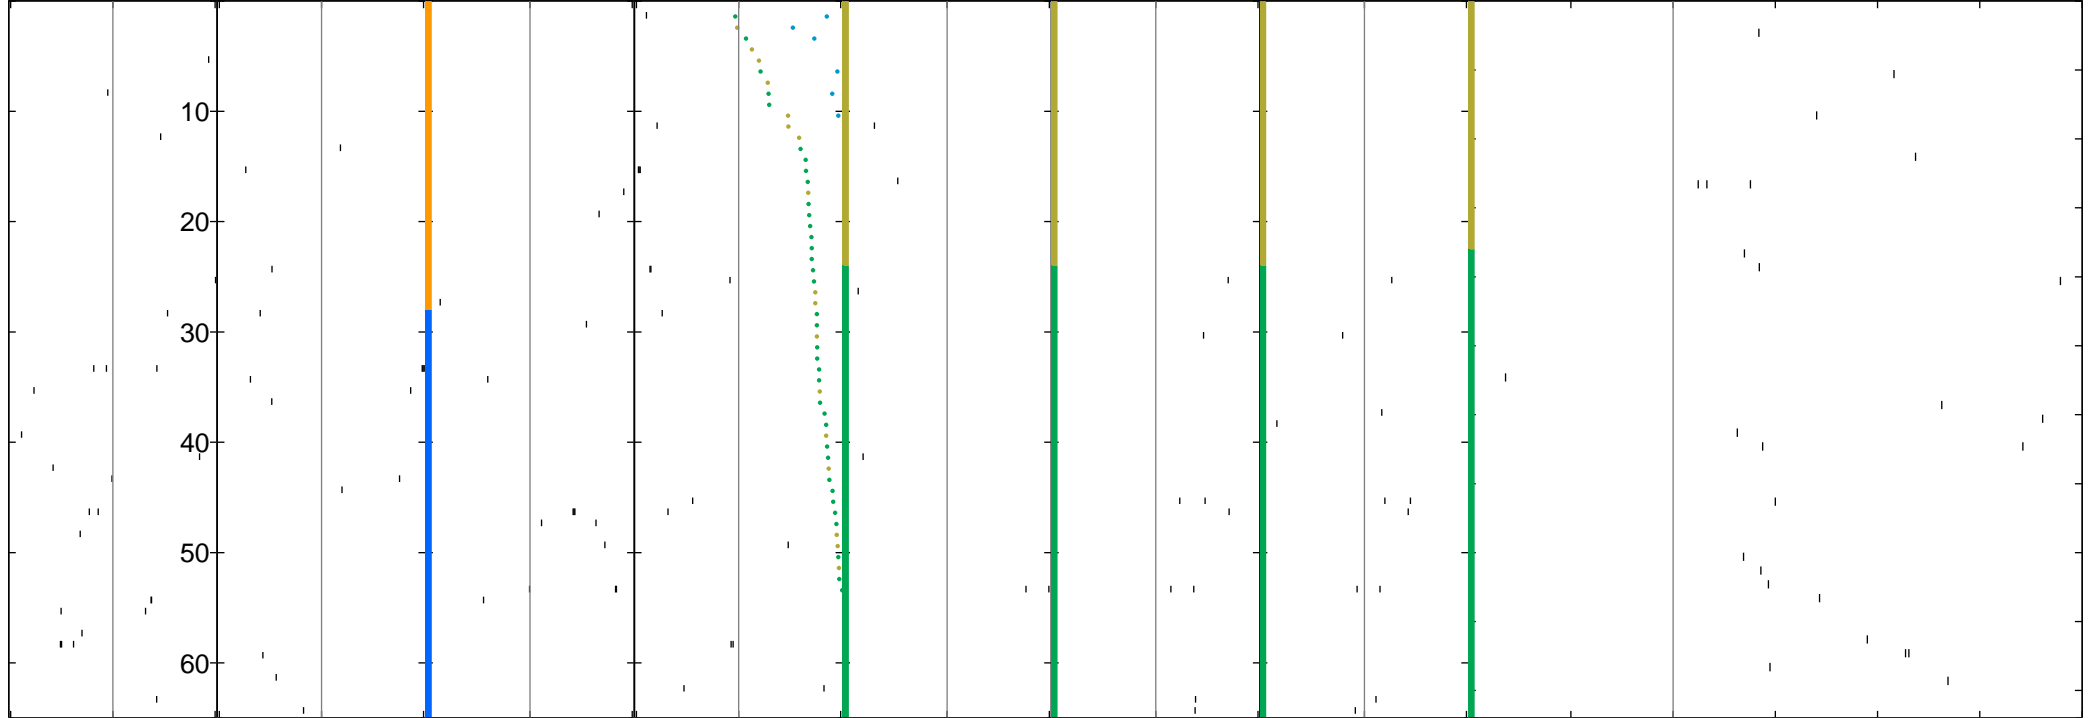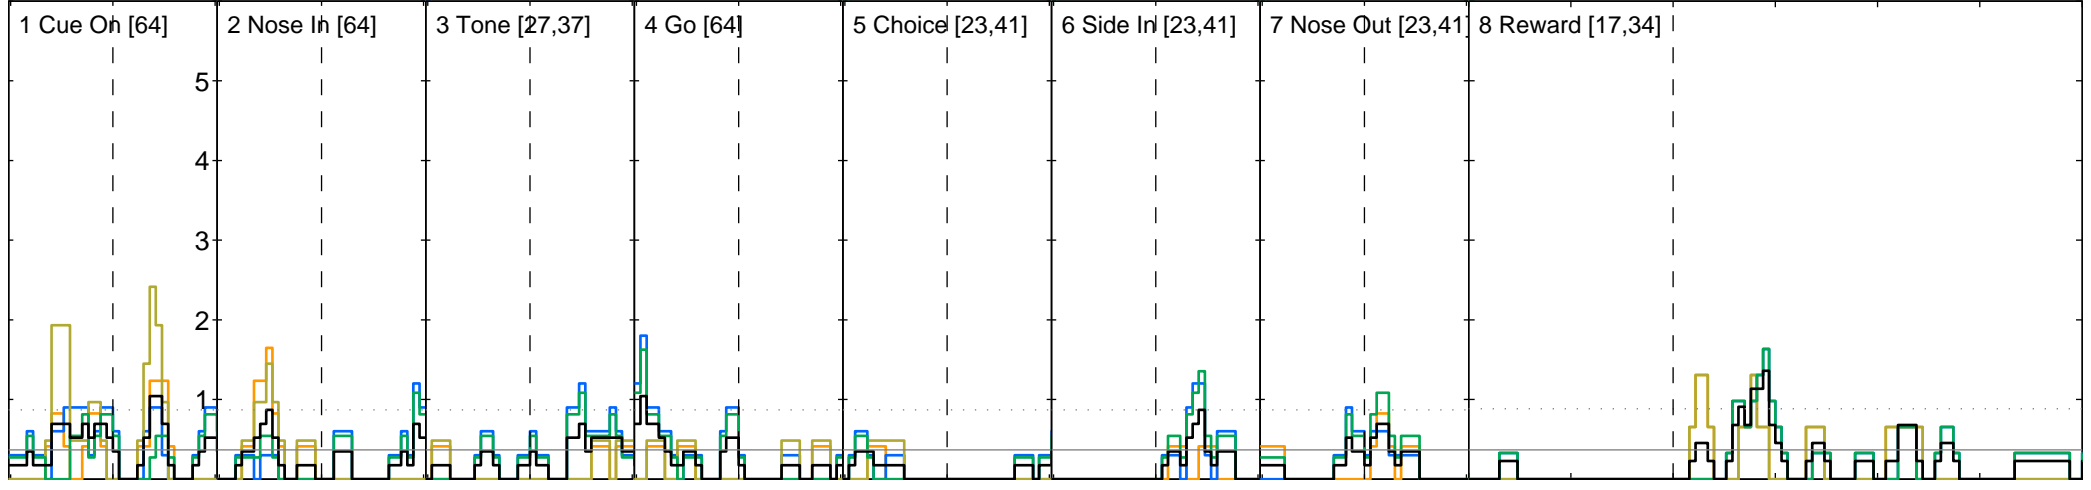

**Cell: C1220071027T03g**

AP: 3.2 ML: 2.6 DV: 2.2  
w: 3 n: 884  $P_{ISI>2}$ : 0.96  
1/2pw: 190 $\mu$ s p->v: 669 $\mu$ s  
 $\beta_T$ : NaN  $\beta_D$ : NaN  
 $\beta_P$ : NaN SI: NaN  
Session FR: 0.151 Hz  
Pk Ev: None  
Pk FR: --

M1<sub>p</sub>

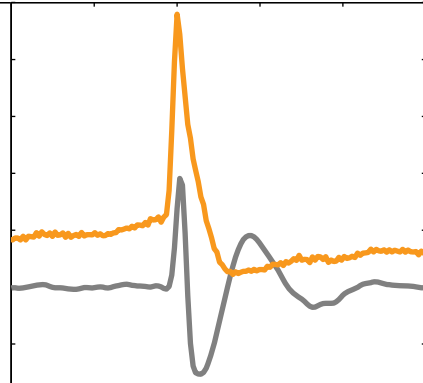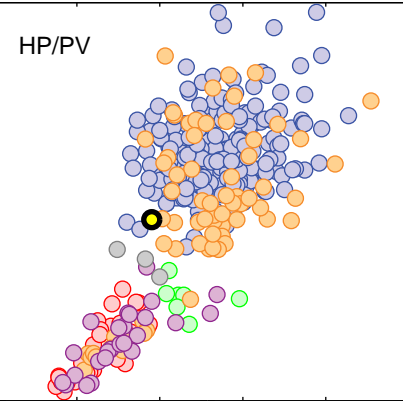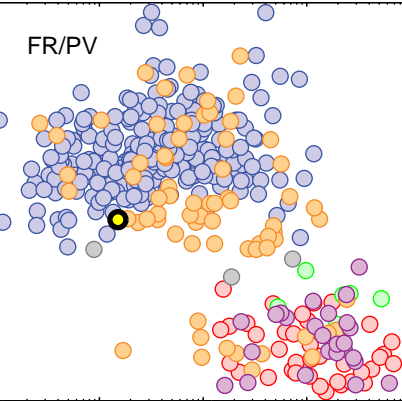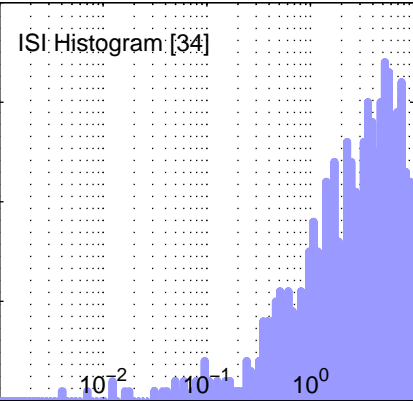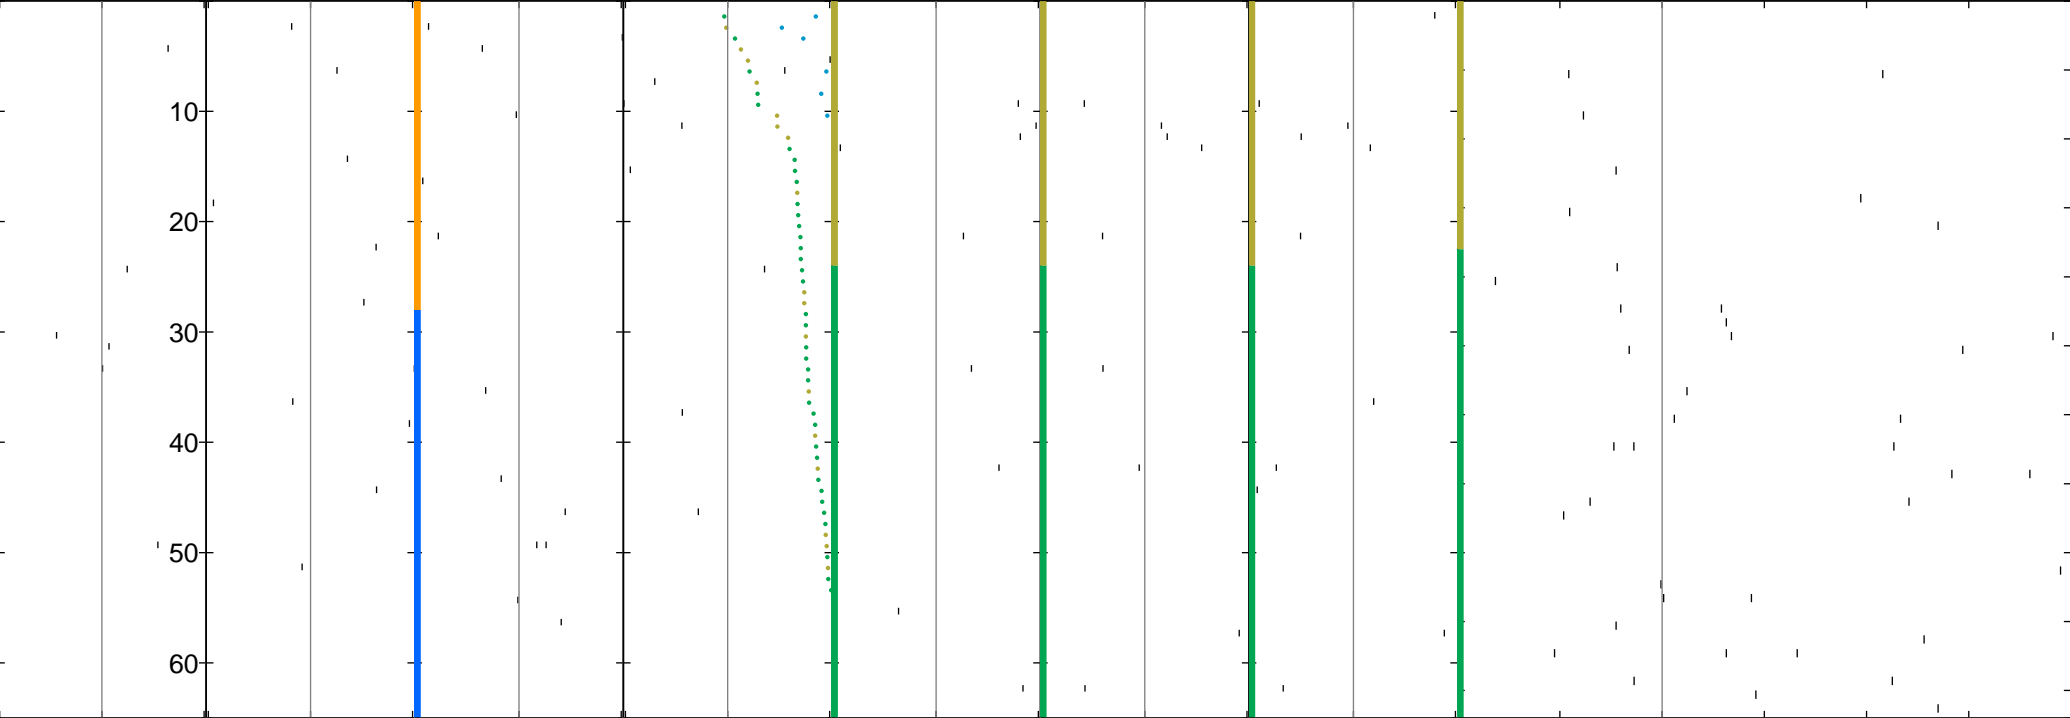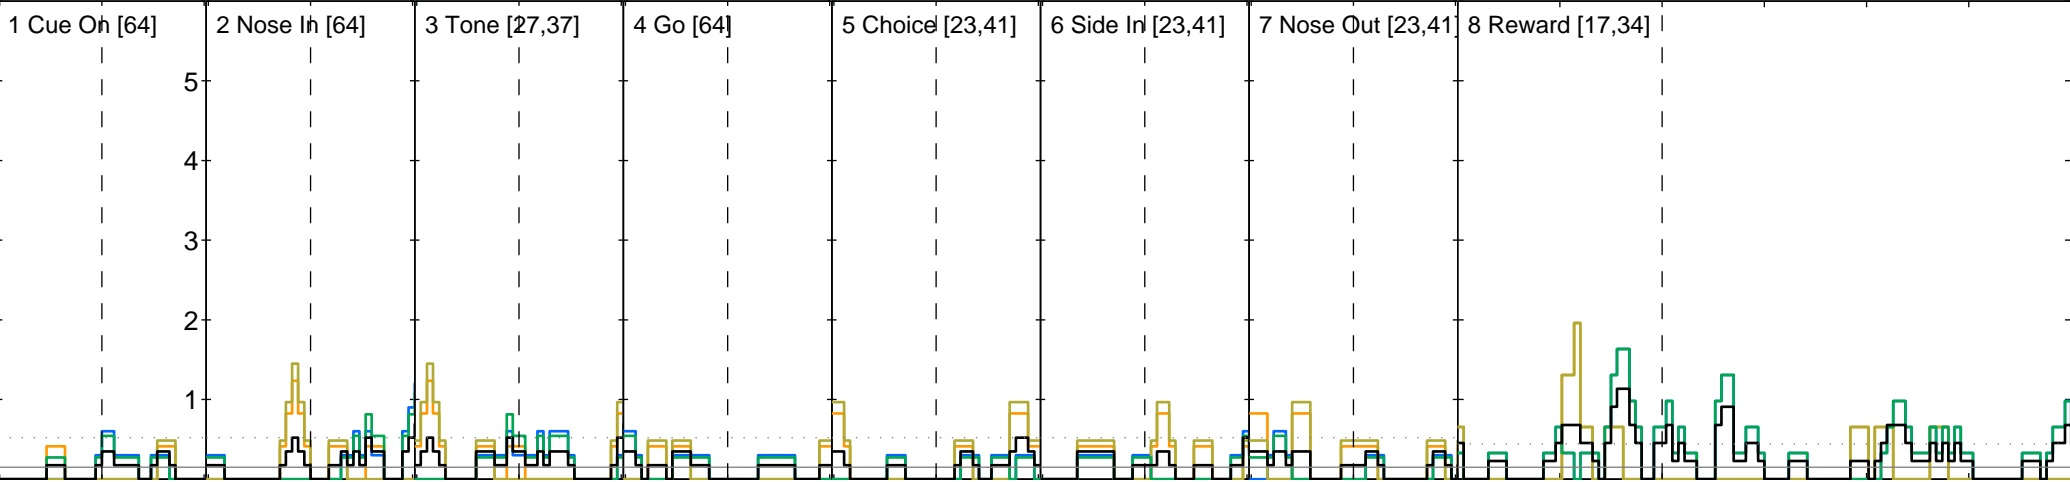

**Cell: C1220071027T03h**

AP: 3.2 ML: 2.6 DV: 2.2  
w: 1 n: 2157  $P_{ISI>2}$ : 0.84  
1/2pw: 342 $\mu$ s p->v: 968 $\mu$ s  
 $\beta_T$ : NaN  $\beta_D$ : NaN  
 $\beta_P$ : NaN SI: NaN  
Session FR: 0.36 Hz  
Pk Ev: None  
Pk FR: --

M1<sub>p</sub>

Waveform

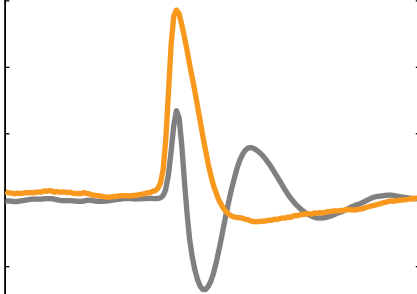

HP/PV

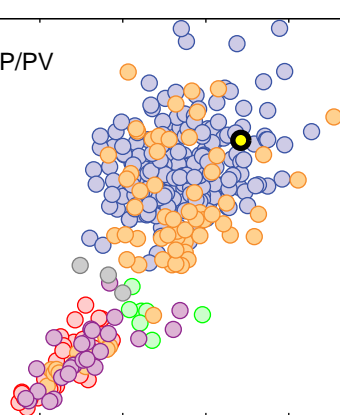

FR/PV

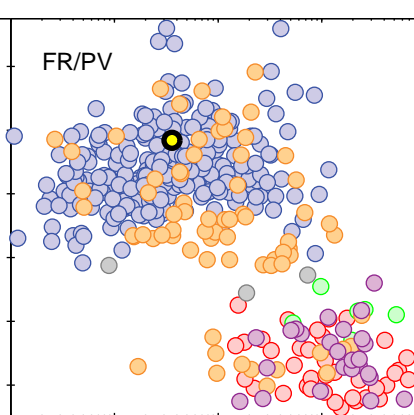

ISI Histogram [73]

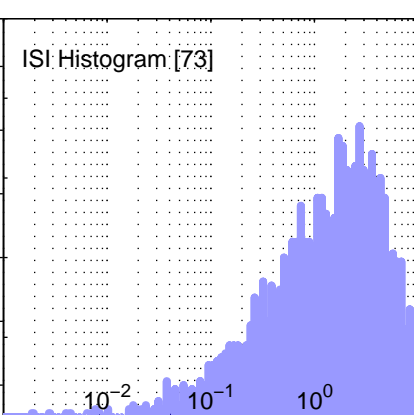

10

20

30

40

50

60

1 Cue On [64]

2 Nose In [64]

3 Tone [27,37]

4 Go [64]

5 Choice [23,41]

6 Side In [23,41]

7 Nose Out [23,41]

8 Reward [17,34]

5

4

3

2

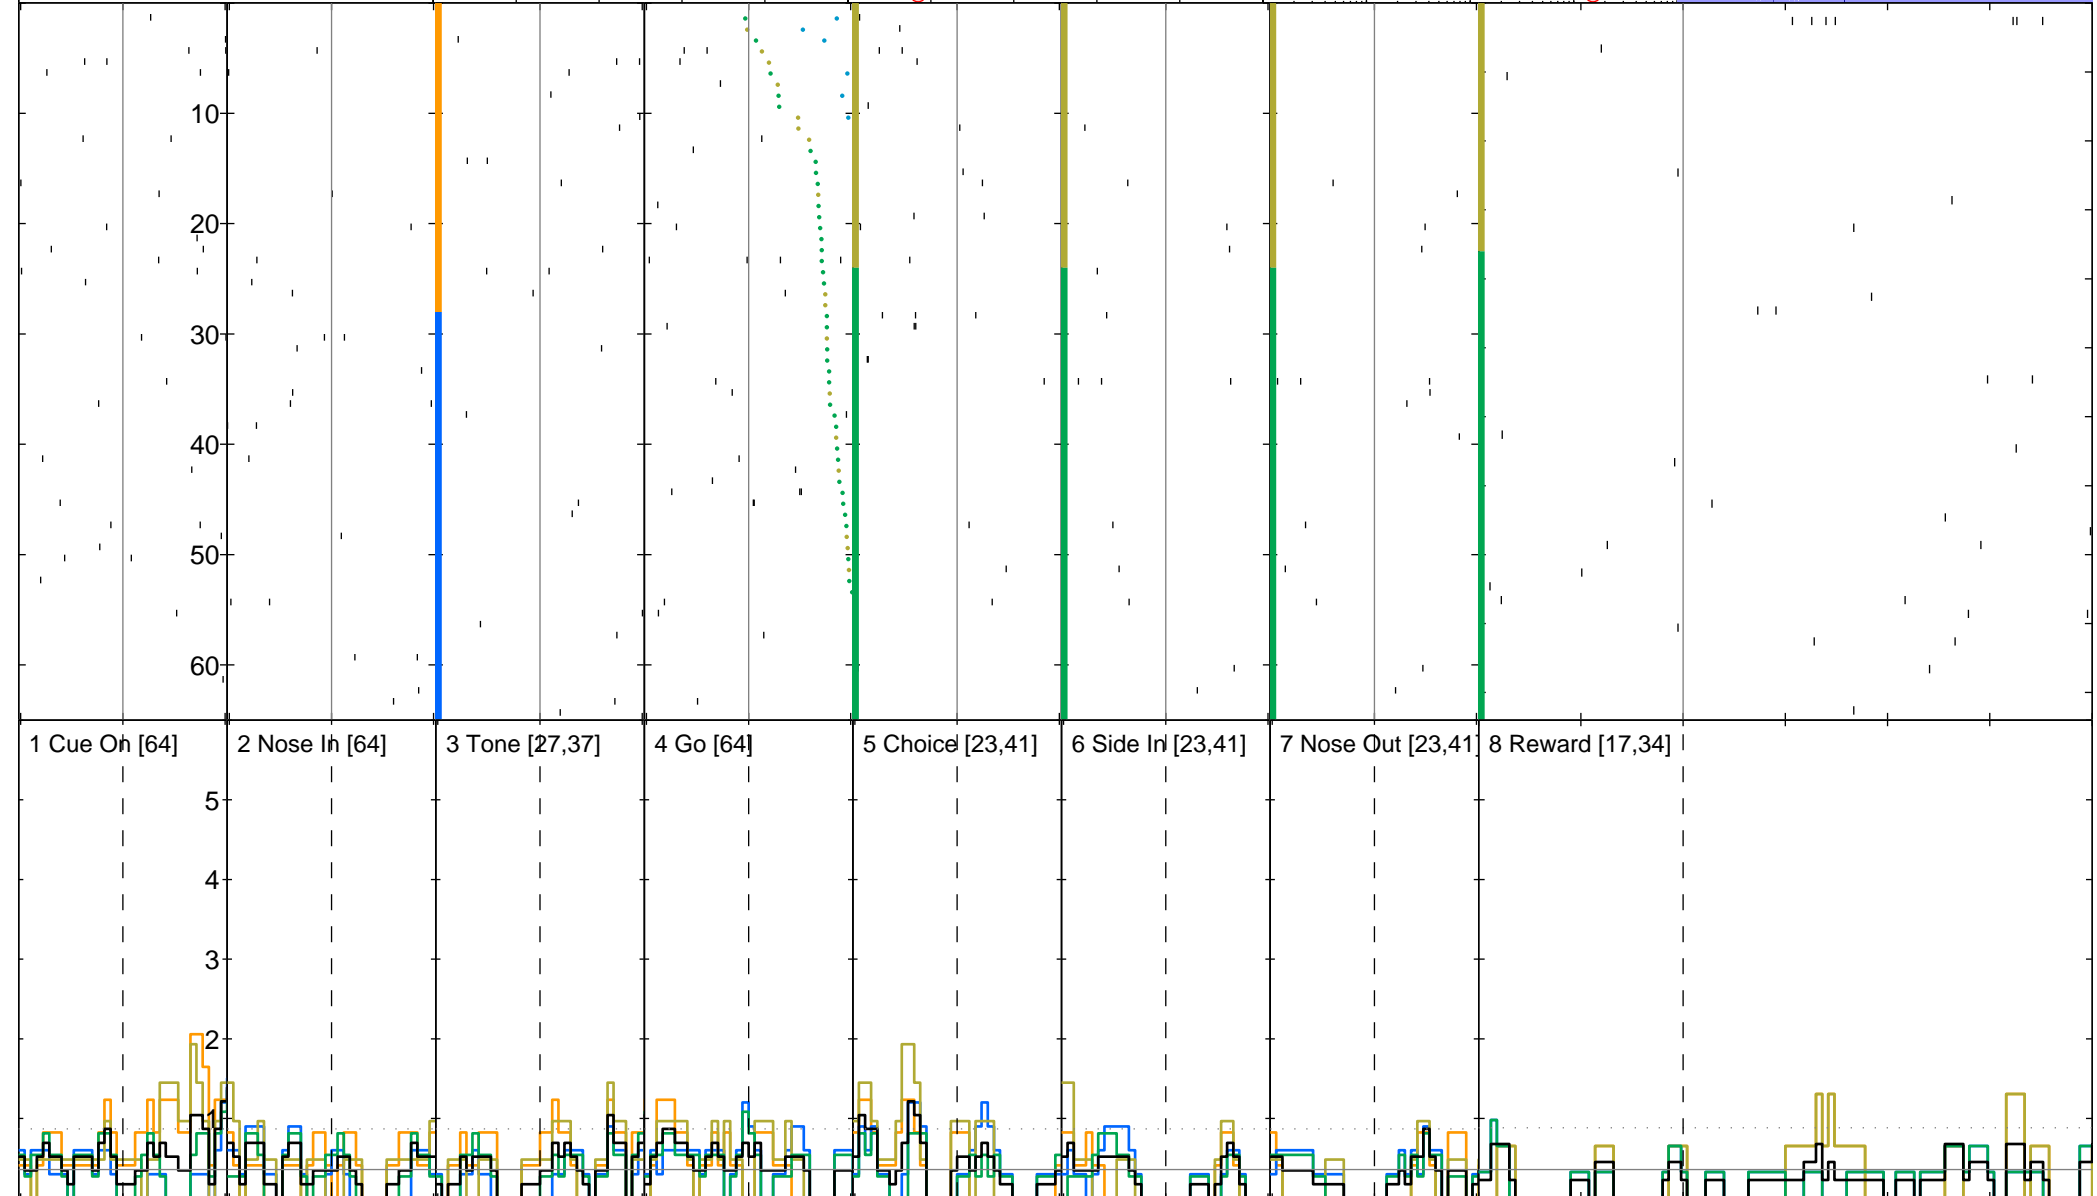

**Cell: C1220071027T03k**

AP: 3.2 ML: 2.6 DV: 2.2

w: 2 n: 4884  $P_{ISI>2}$ : 0.691/2pw: 288 $\mu$ s p $\rightarrow$ v: 722 $\mu$ s $\beta_T$ : NaN  $\beta_D$ : NaN $\beta_P$ : NaN SI: NaN

Session FR: 0.816 Hz

Pk Ev: None

Pk FR: --

M1<sub>P</sub>

Waveform

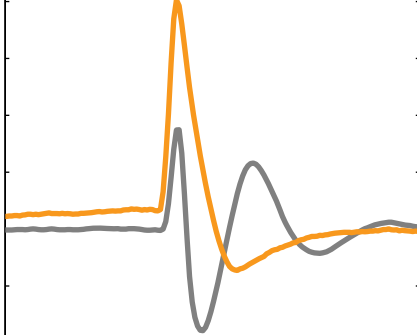

HP/PV

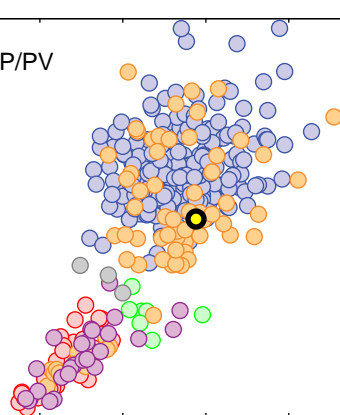

FR/PV

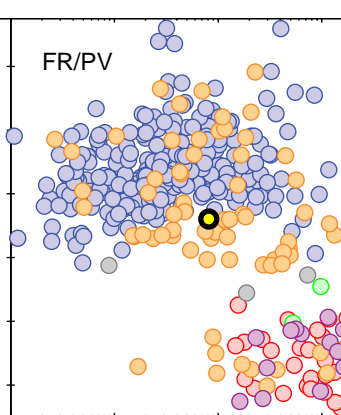

ISI Histogram [111]

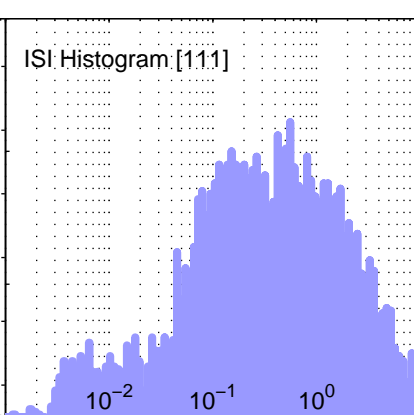

10

20

30

40

50

60

1 Cue On [64]

2 Nose In [64]

3 Tone [27,37]

4 Go [64]

5 Choice [23,41]

6 Side In [23,41]

7 Nose Out [23,41]

8 Reward [17,34]

5

4

3

2

1

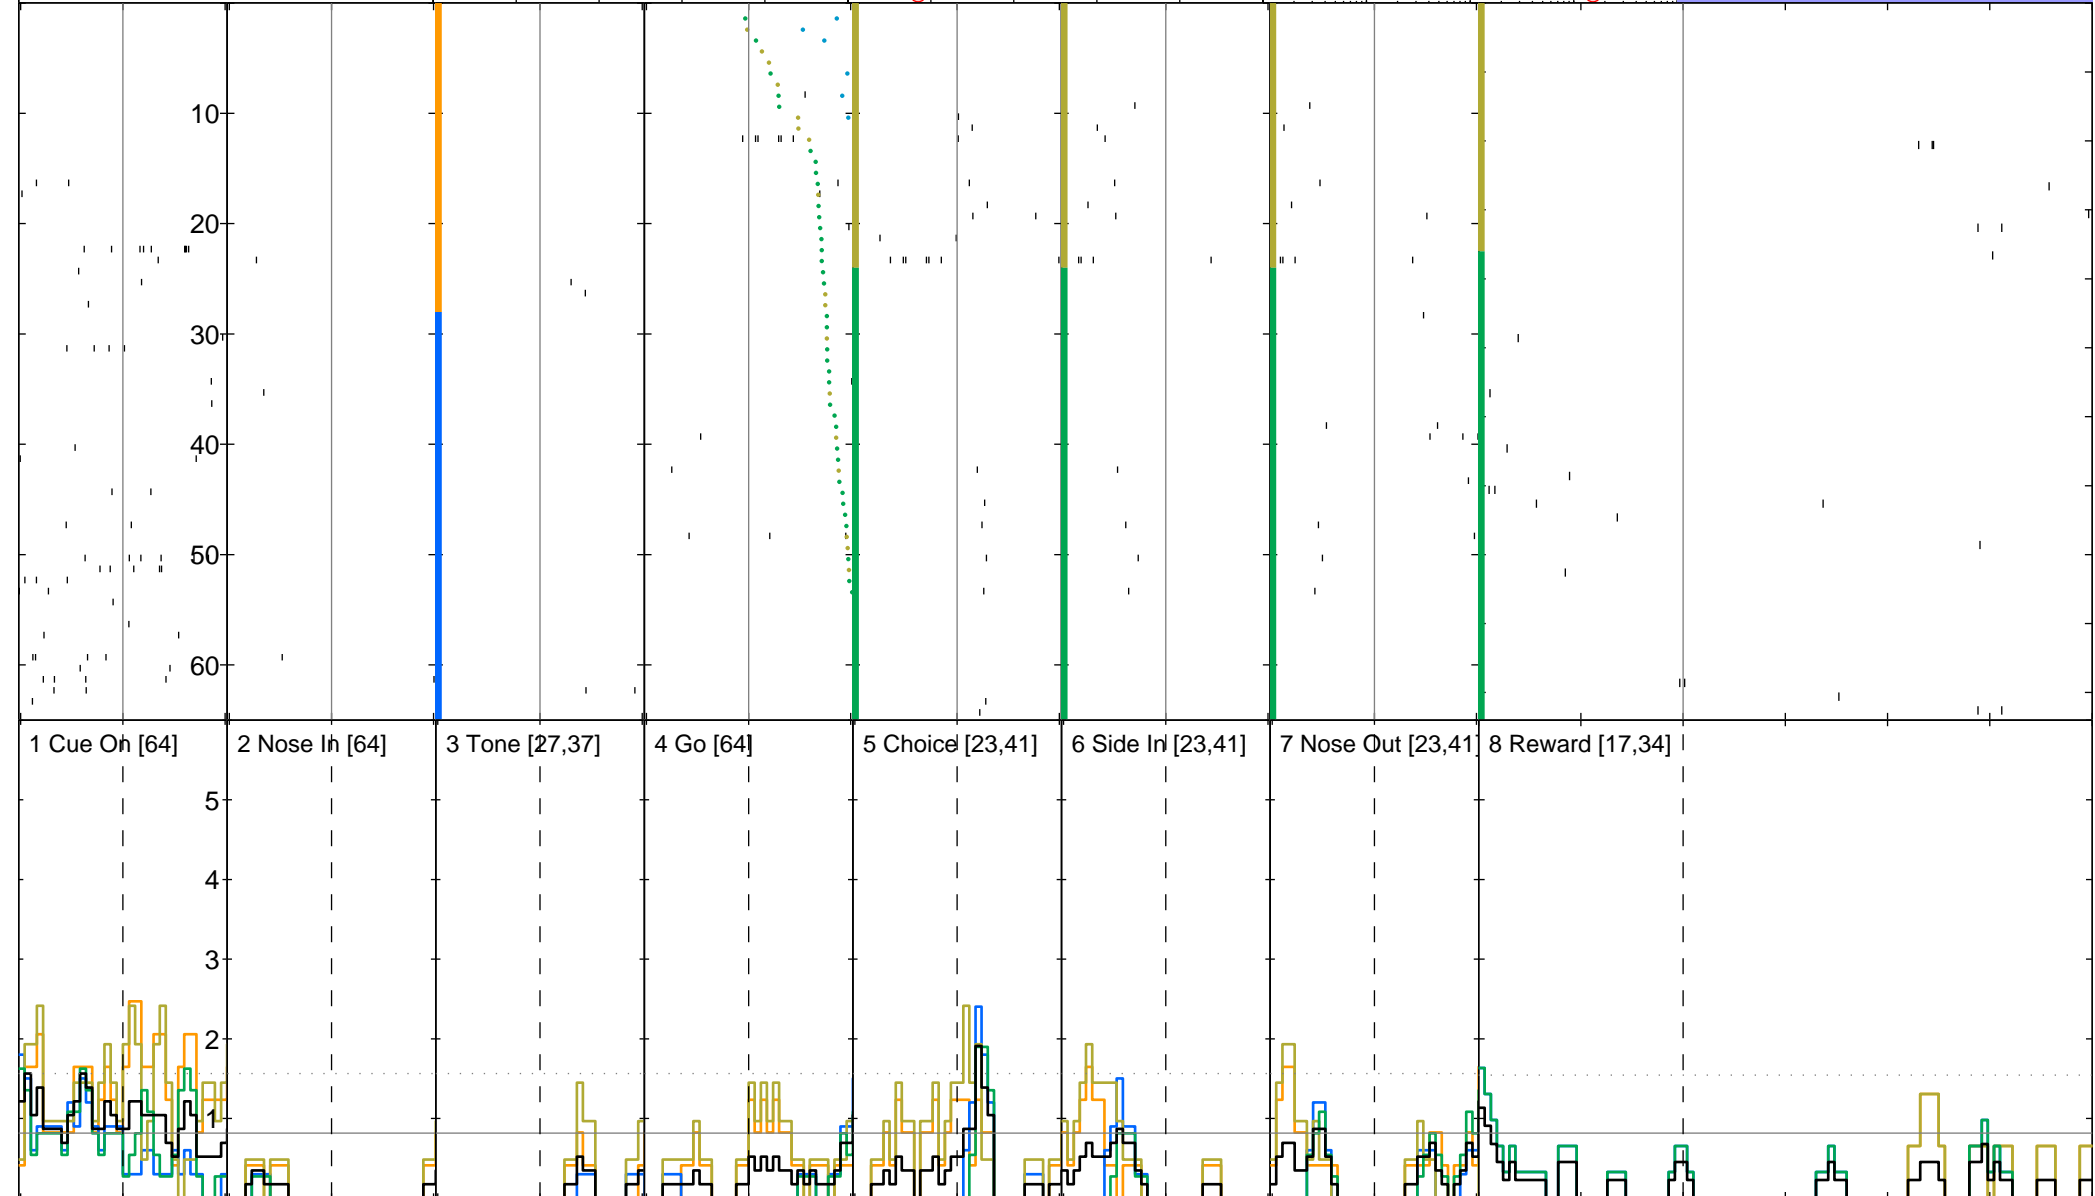

Cell: C1220071028T01a

AP: 4.2 ML: 3.6 DV: 1.9

w: 3 n: 5504  $P_{ISI>2}$ : 0.43

1/2pw: 454 $\mu$ s p $\rightarrow$ v: 1042 $\mu$ s

$\beta_T$ : 0.85  $\beta_D$ : 1

$\beta_P$ : 2.4 SI: NaN

Session FR: 1.1 Hz

Pk Ev: None

Pk FR: --

M1<sub>p</sub>

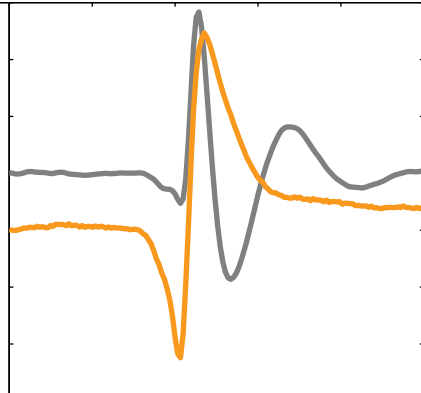

HP/PV

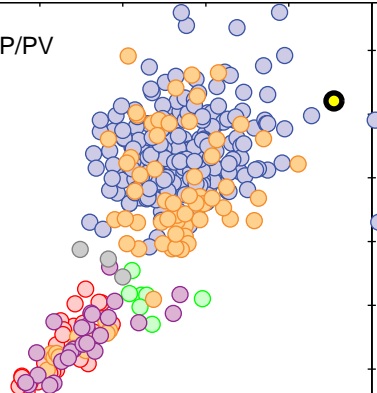

FR/PV

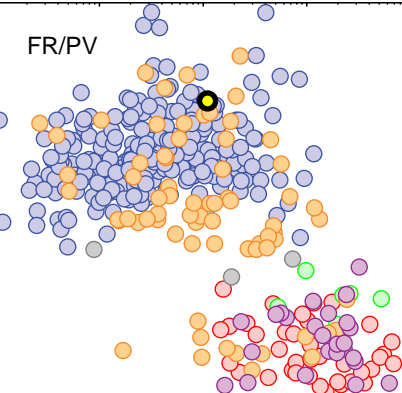

ISI Histogram [176]

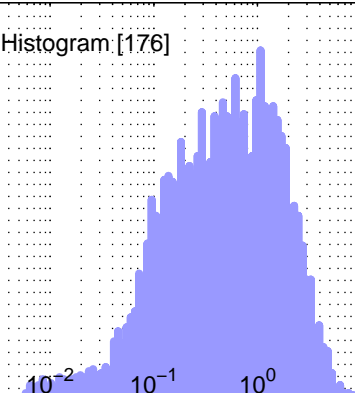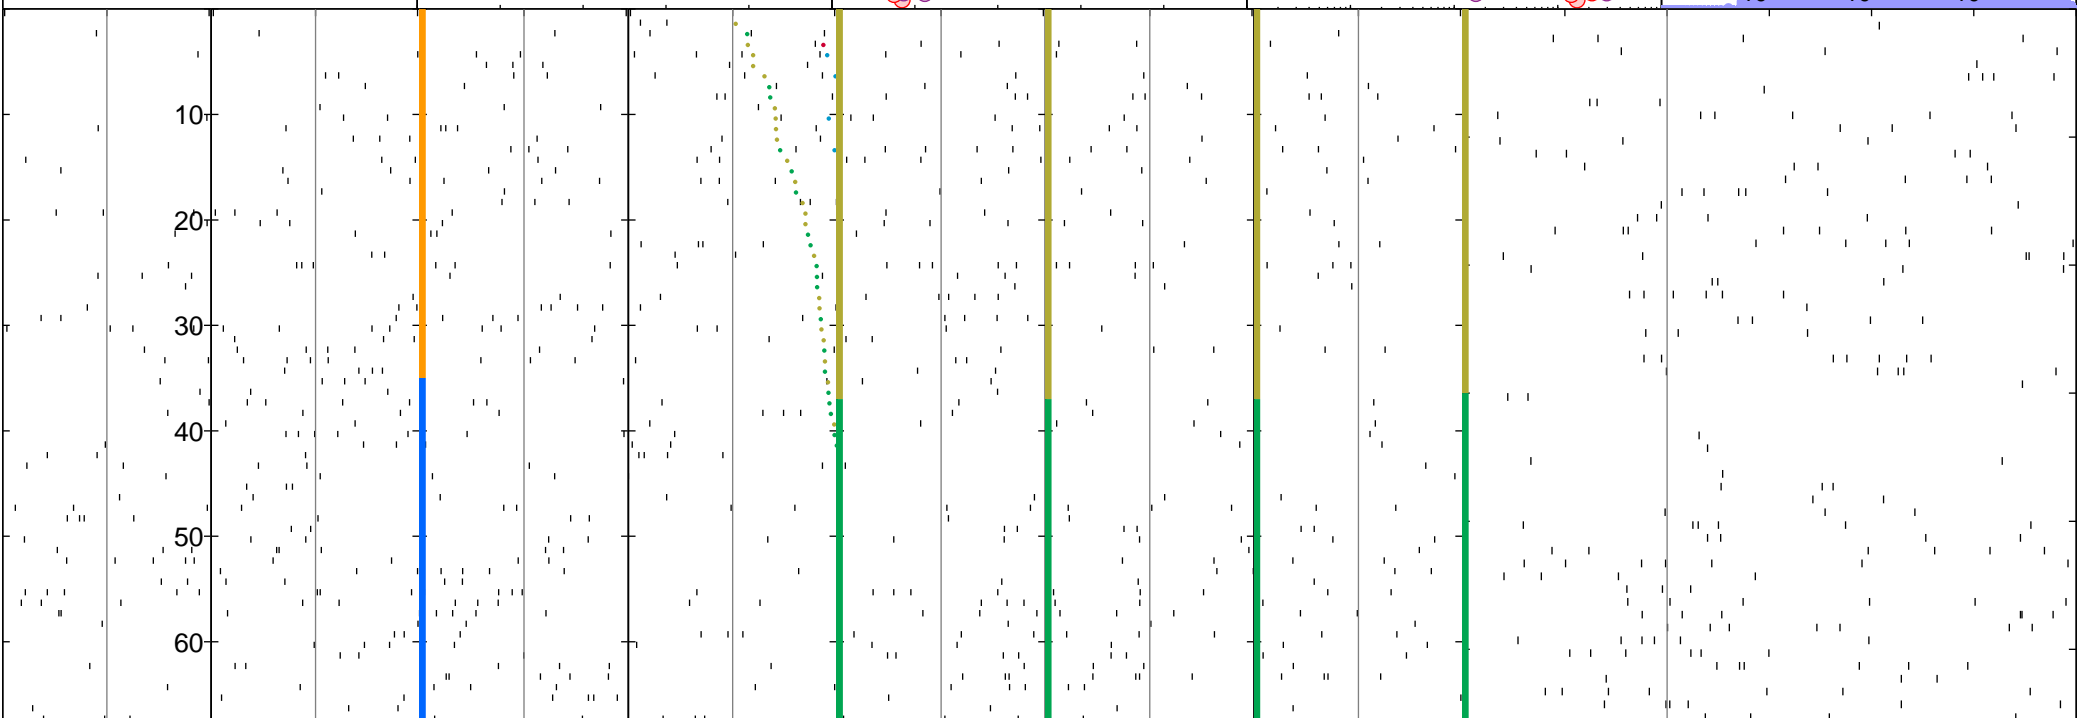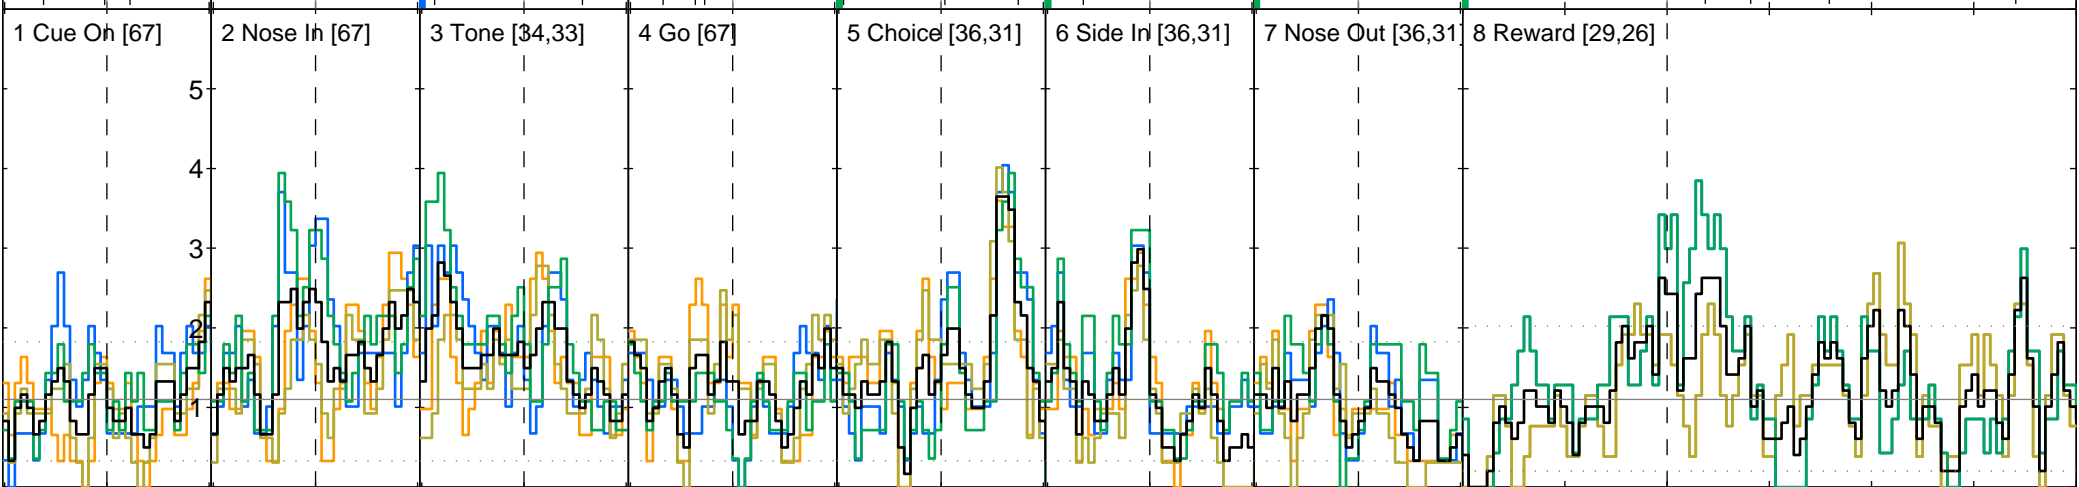

1 Cue On [67]

2 Nose In [67]

3 Tone [34,33]

4 Go [67]

5 Choice [36,31]

6 Side In [36,31]

7 Nose Out [36,31]

8 Reward [29,26]

**Cell: C1220071028T03a**

AP: 3.2 ML: 2.6 DV: 2.3  
w: 2 n: 1112  $P_{ISI>2}$ : 0.95  
1/2pw: 203 $\mu$ s p->v: 672 $\mu$ s  
 $\beta_T$ : NaN  $\beta_D$ : NaN  
 $\beta_P$ : NaN SI: NaN  
Session FR: 0.188 Hz  
Pk Ev: None  
Pk FR: --

M1<sub>P</sub>

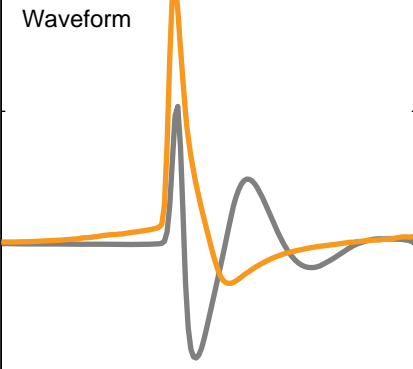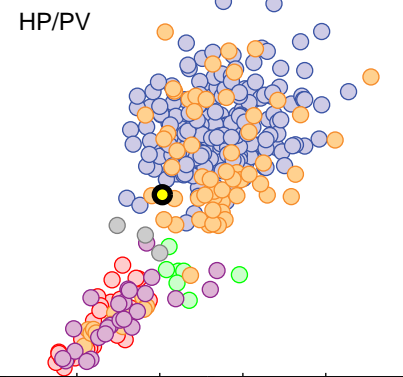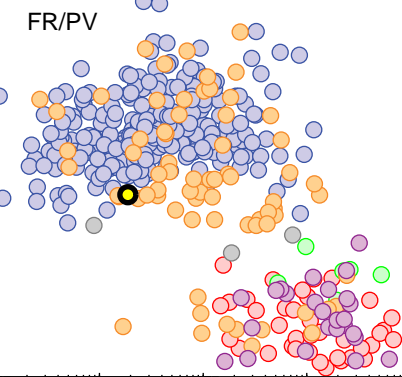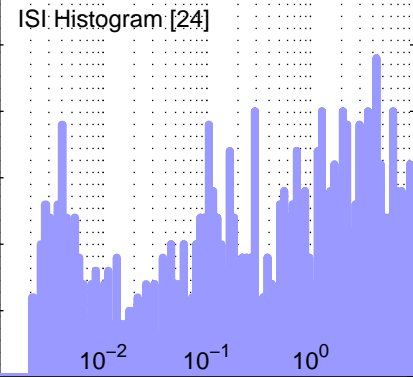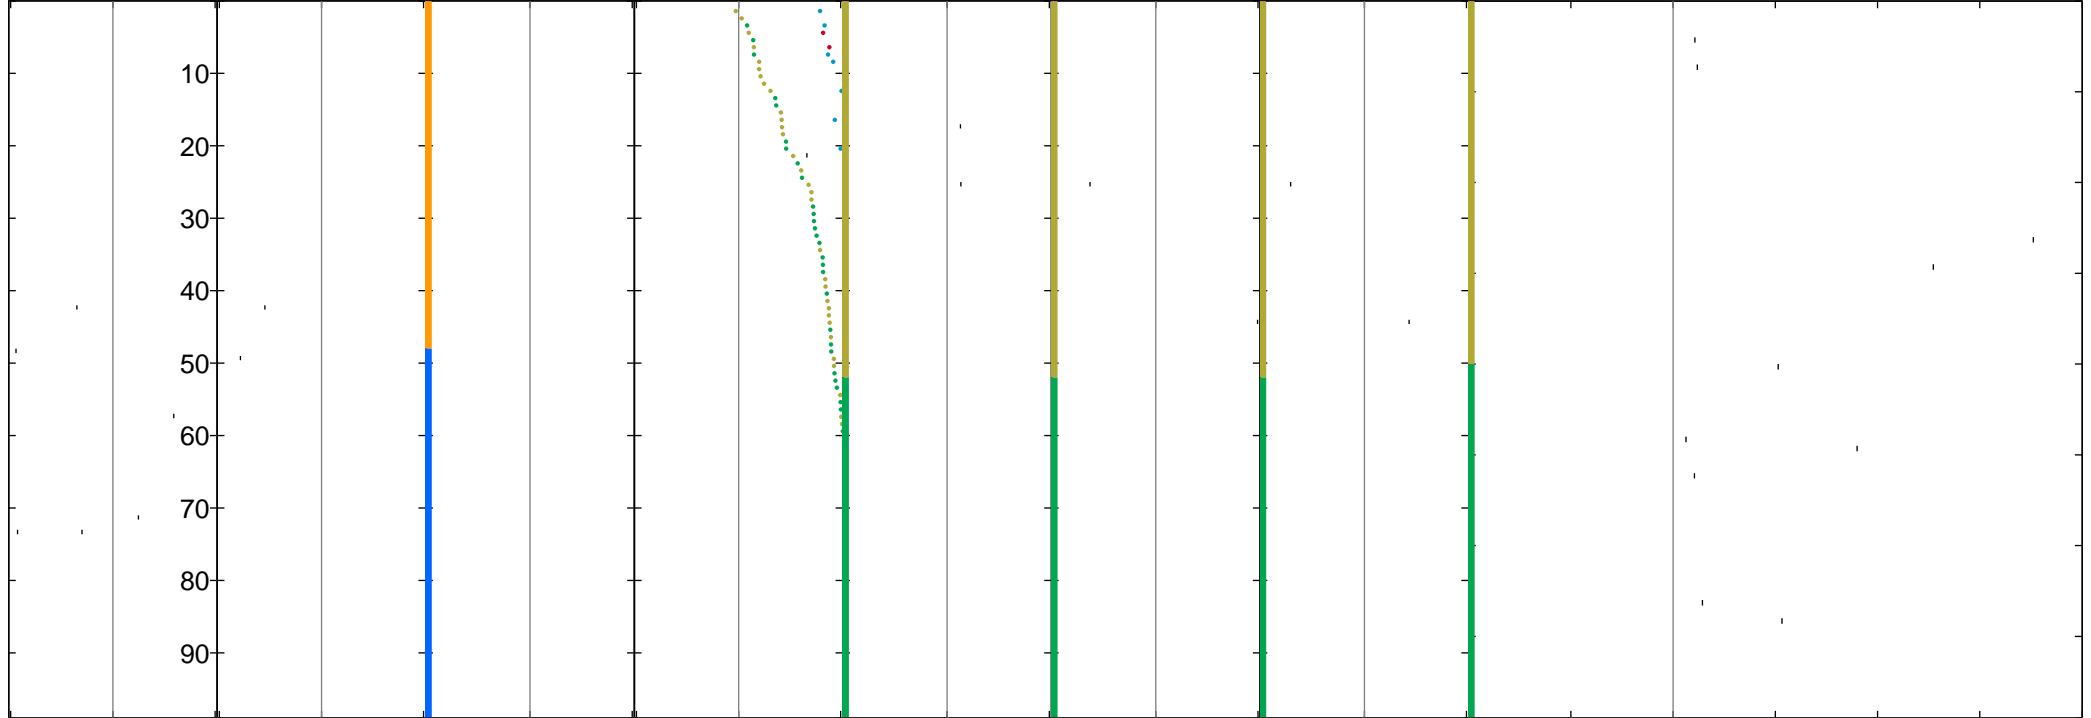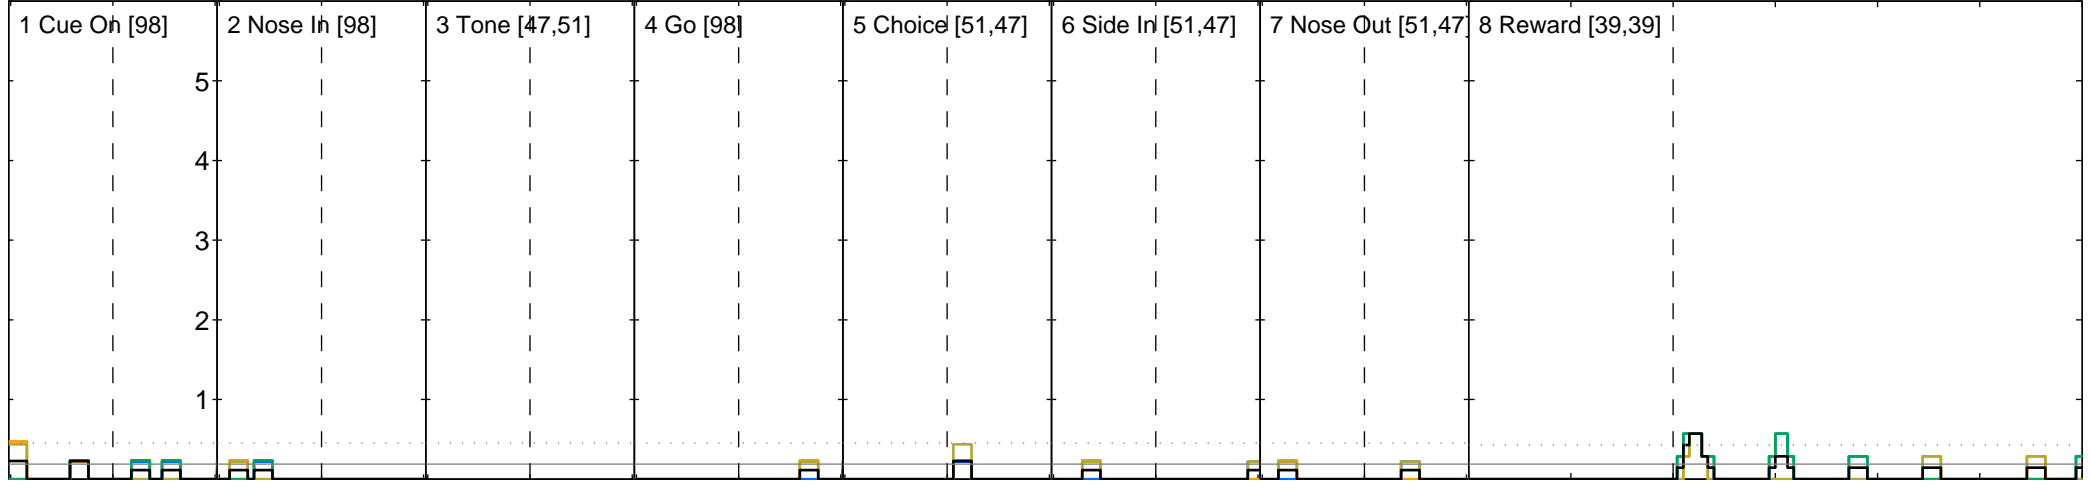

Cell: C1220071028T03f

AP: 3.2 ML: 2.6 DV: 2.3

w: 3 n: 7729  $P_{ISI>2}$ : 0.66

1/2pw: 261 $\mu$ s p $\rightarrow$ v: 720 $\mu$ s

$\beta_T$ : 0.42  $\beta_D$ : 0.83

$\beta_P$ : -0.9 SI: NaN

Session FR: 1.29 Hz

Pk Ev: None

Pk FR: --

M1<sub>p</sub>

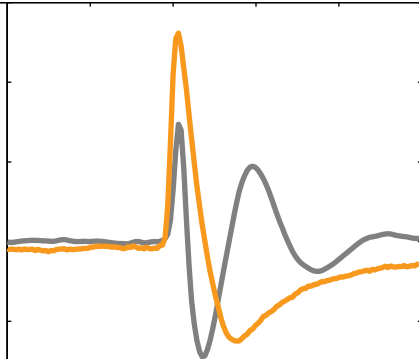

HP/PV

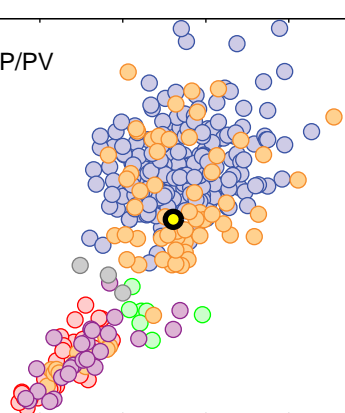

FR/PV

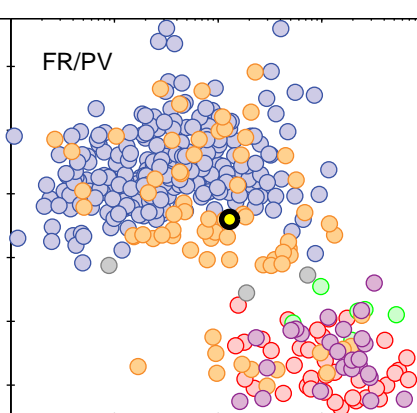

ISI Histogram [228]

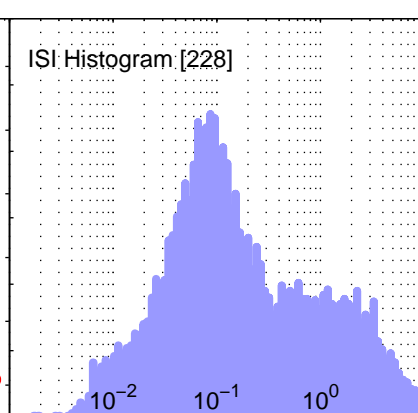

10  
20  
30  
40  
50  
60  
70  
80  
90

1 Cue On [98]

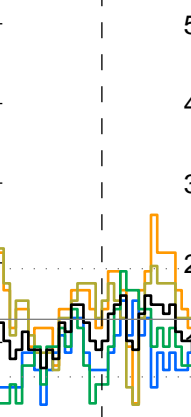

2 Nose In [98]

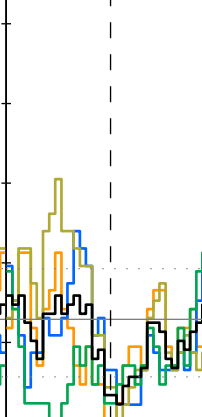

3 Tone [47,51]

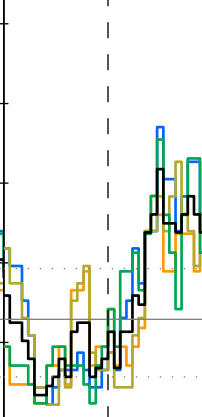

4 Go [98]

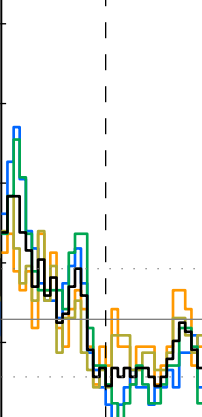

5 Choice [51,47]

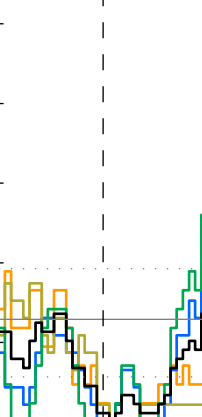

6 Side In [51,47]

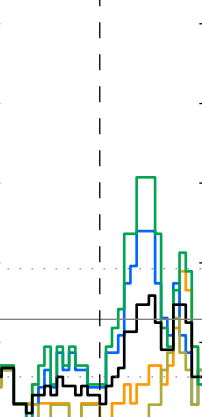

7 Nose Out [51,47]

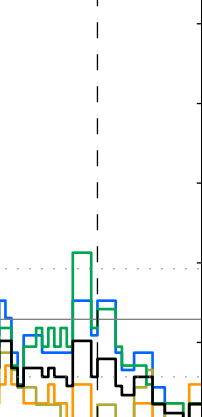

8 Reward [39,39]

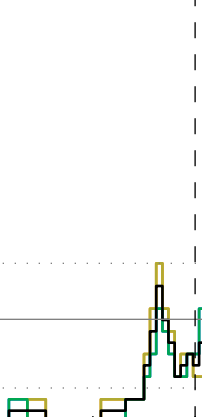

5  
4  
3  
2

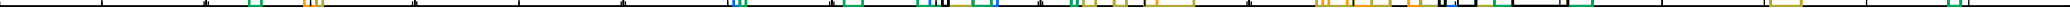



**Cell: C1220071028T03g**

AP: 3.2 ML: 2.6 DV: 2.3  
w: 3 n: 1722  $P_{ISI>2}$ : 0.93  
1/2pw: 254 $\mu$ s p->v: 670 $\mu$ s  
 $\beta_T$ : NaN  $\beta_D$ : NaN  
 $\beta_P$ : NaN SI: NaN  
Session FR: 0.287 Hz  
Pk Ev: None  
Pk FR: --

M1<sub>P</sub>

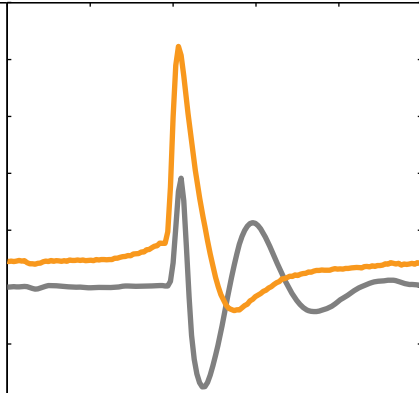

HP/PV

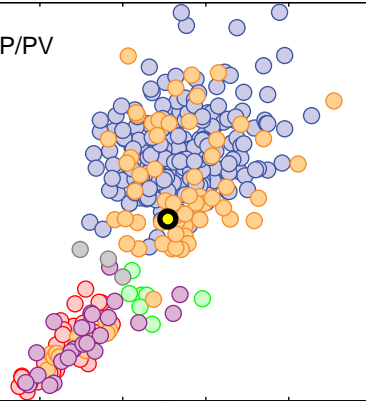

FR/PV

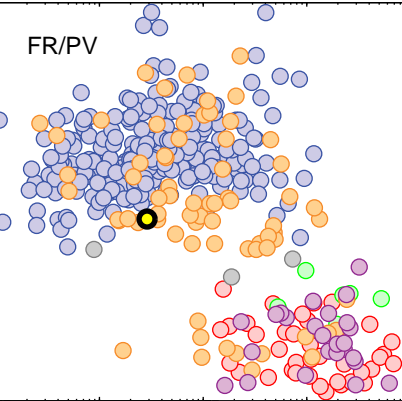

ISI Histogram [41]

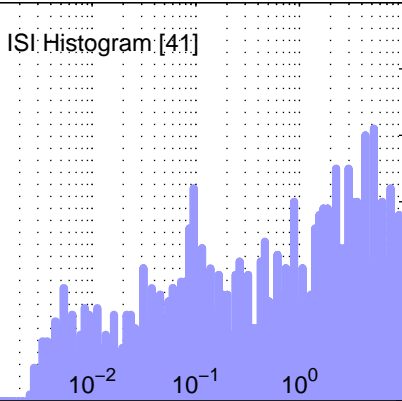

10  
20  
30  
40  
50  
60  
70  
80  
90

1 Cue On [98] 2 Nose In [98] 3 Tone [47,51] 4 Go [98] 5 Choice [51,47] 6 Side In [51,47] 7 Nose Out [51,47] 8 Reward [39,39]

5  
4  
3  
2  
1

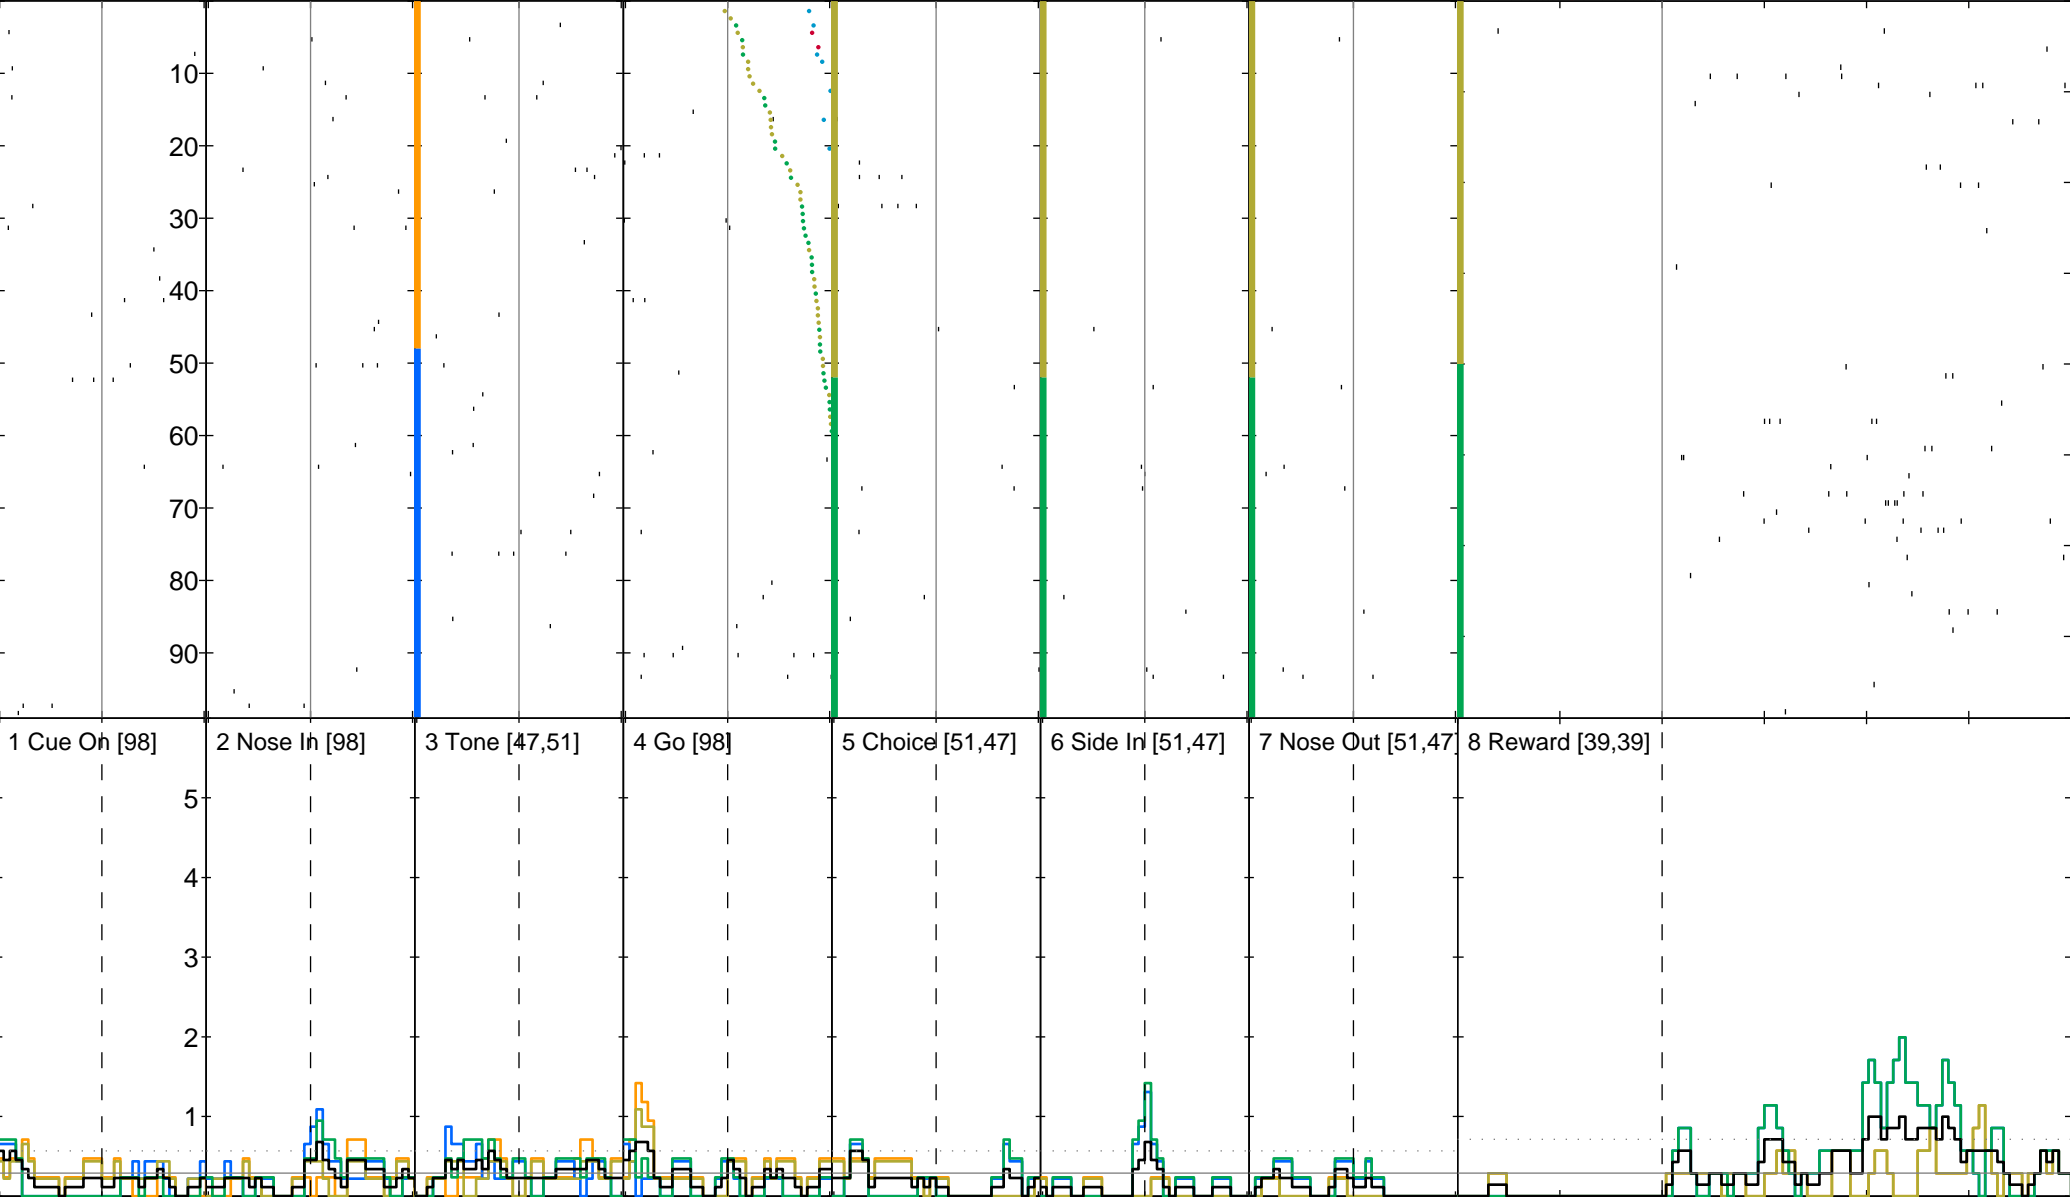

**Cell: C1220071114T03f**

AP: 3.2 ML: 2.6 DV: 2.4  
w: 2 n: 2898  $P_{ISI>2}$ : 0.86  
1/2pw: 280 $\mu$ s p->v: 744 $\mu$ s  
 $\beta_T$ : NaN  $\beta_D$ : NaN  
 $\beta_P$ : NaN SI: NaN  
Session FR: 0.476 Hz  
Pk Ev: None  
Pk FR: --

M1<sub>p</sub>

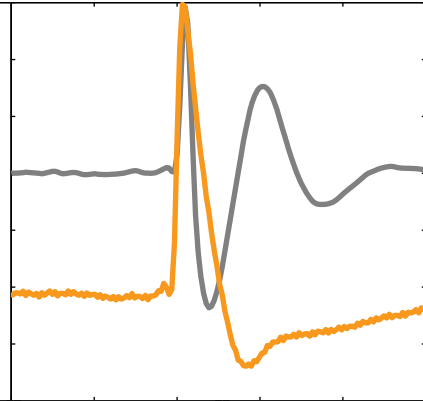

HP/PV

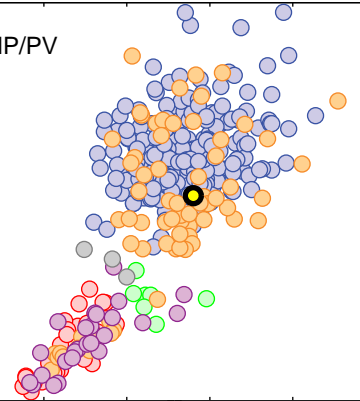

FR/PV

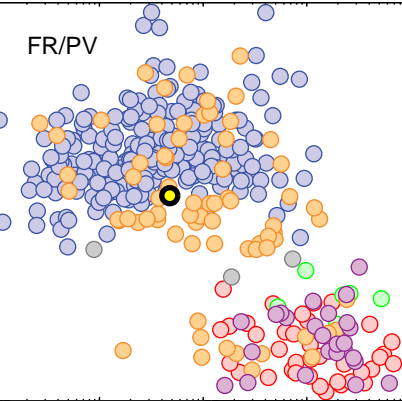

ISI Histogram [58]

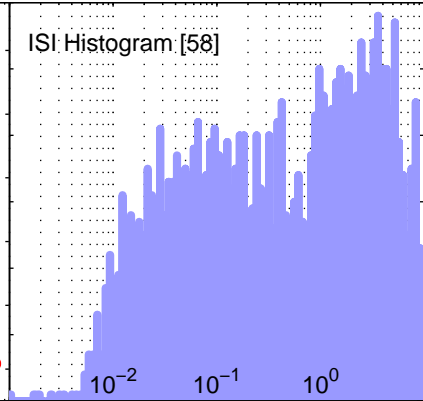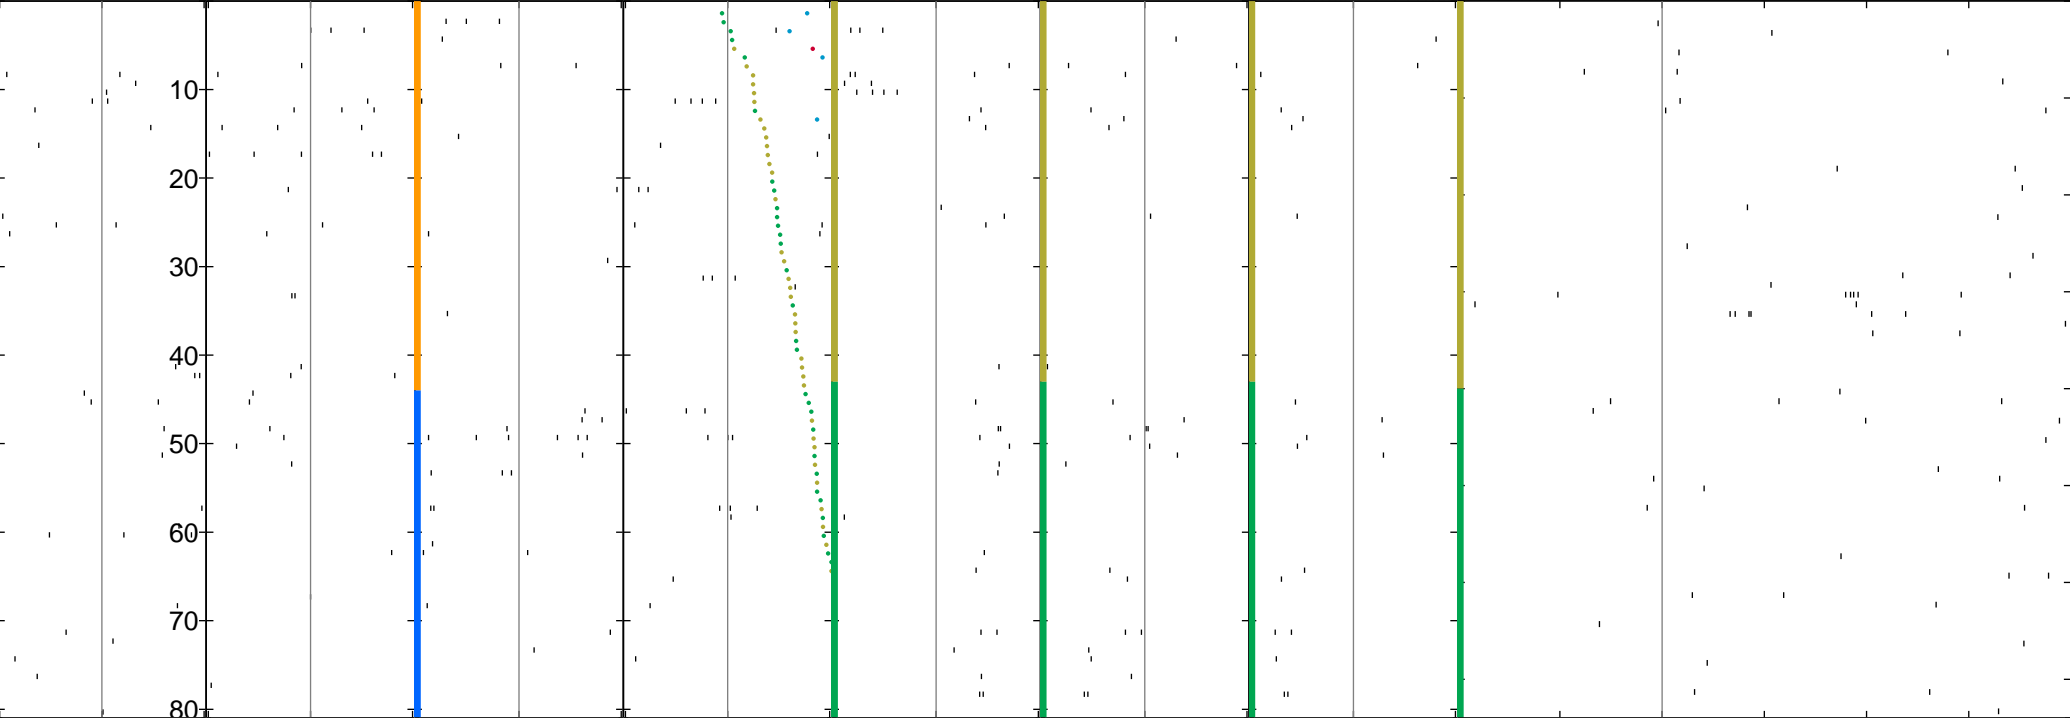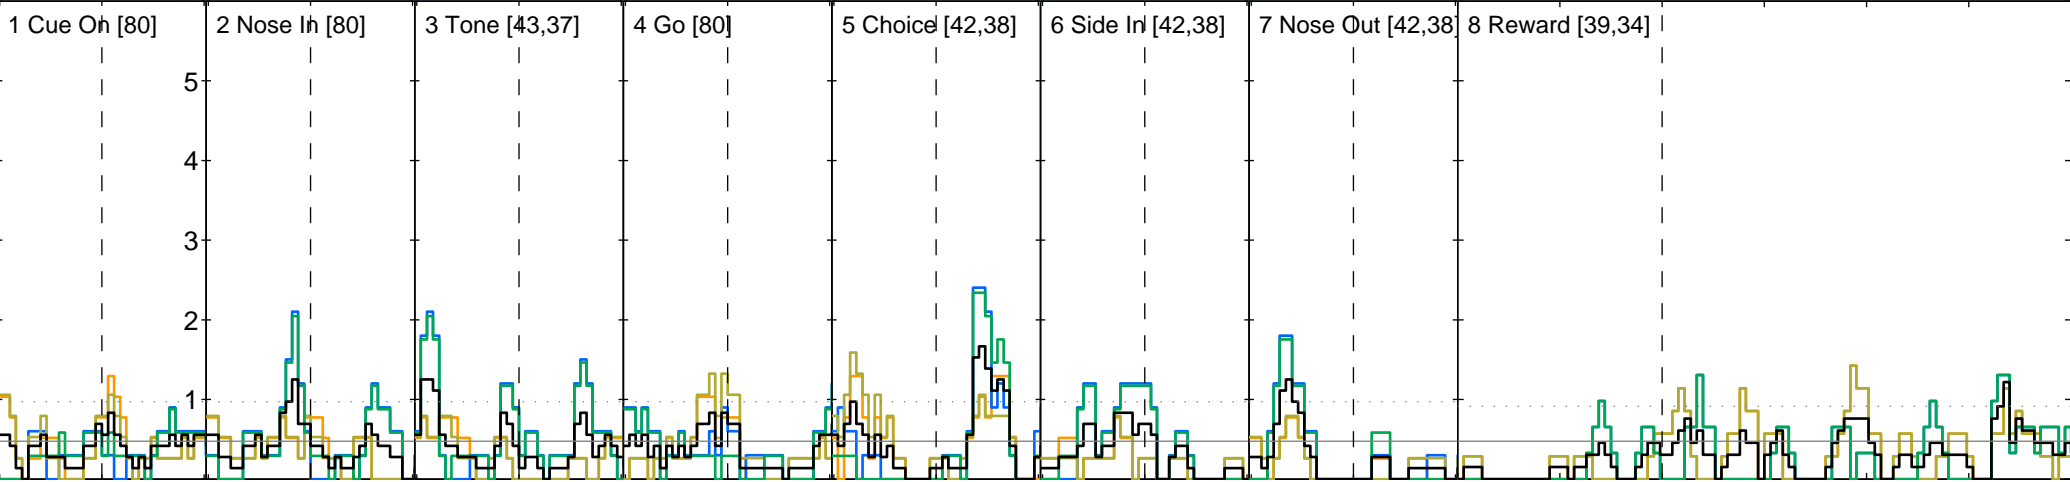

**Cell: C1220071115T03a**

AP: 3.2 ML: 2.6 DV: 2.5  
w: 1 n: 3010  $P_{ISI>2}$ : 0.93  
1/2pw: 307 $\mu$ s p->v: 869 $\mu$ s  
 $\beta_T$ : NaN  $\beta_D$ : NaN  
 $\beta_P$ : NaN SI: NaN  
Session FR: 0.428 Hz  
Pk Ev: None  
Pk FR: --

M1<sub>P</sub>

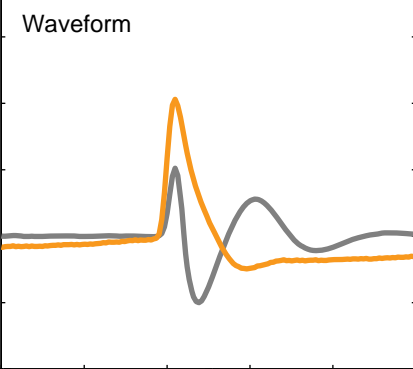

HP/PV

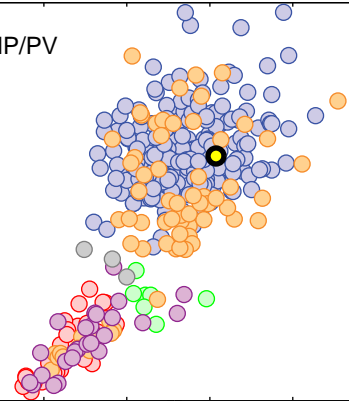

FR/PV

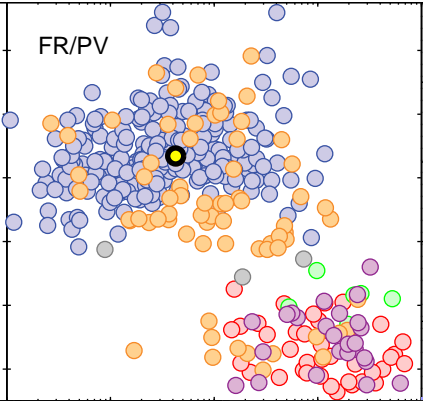

ISI Histogram [67]

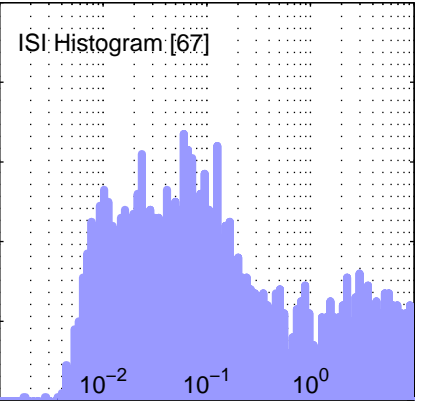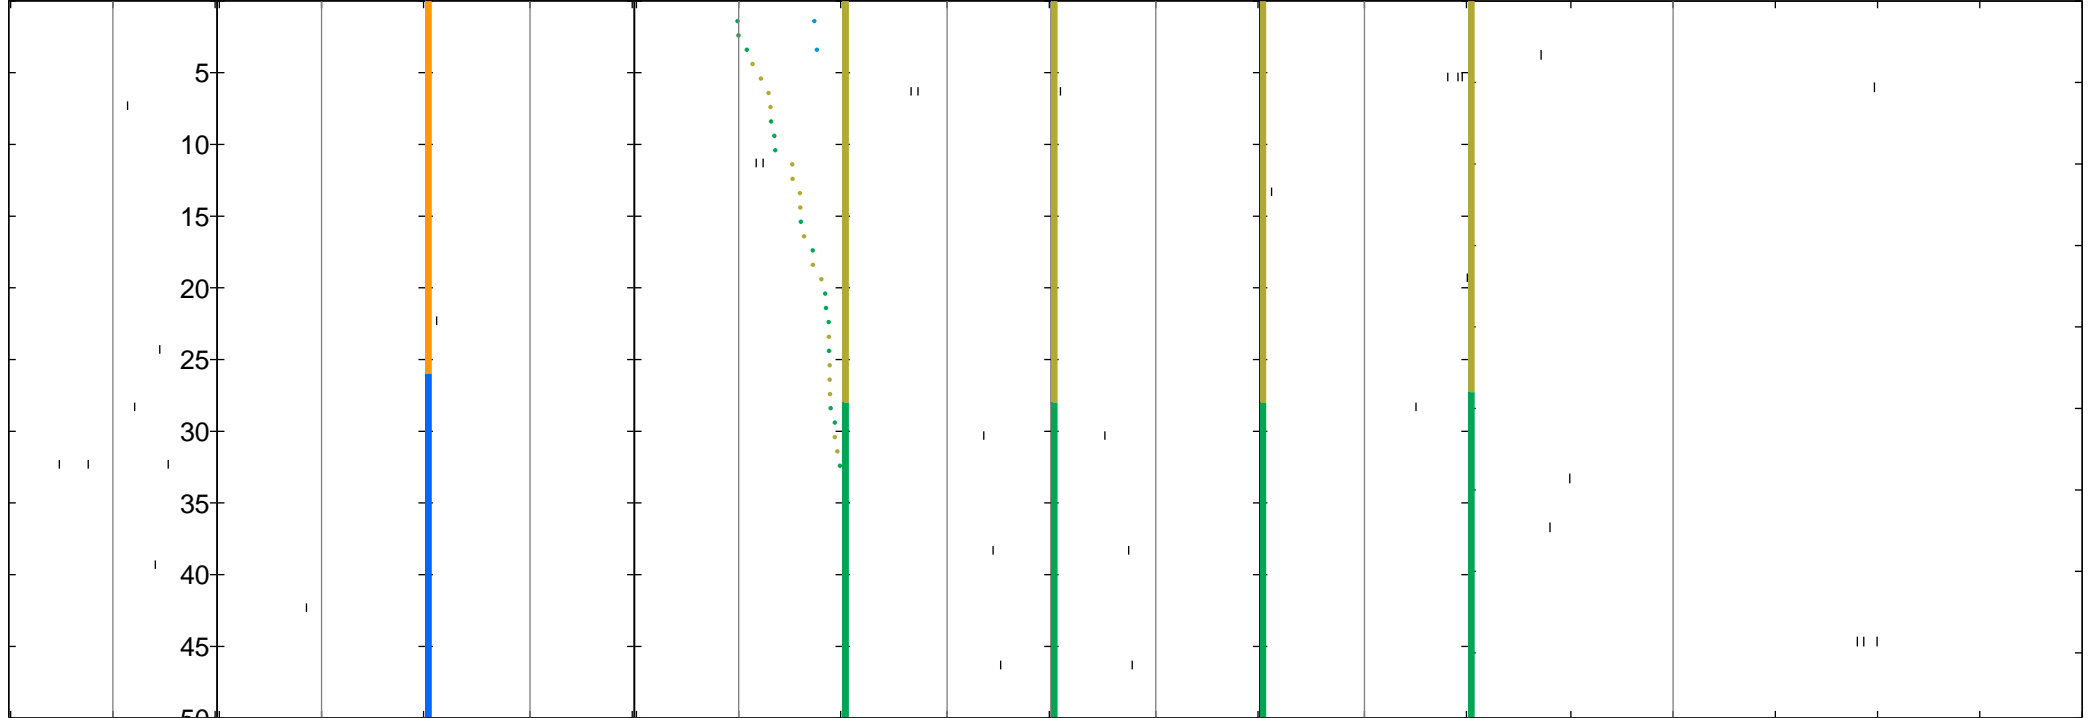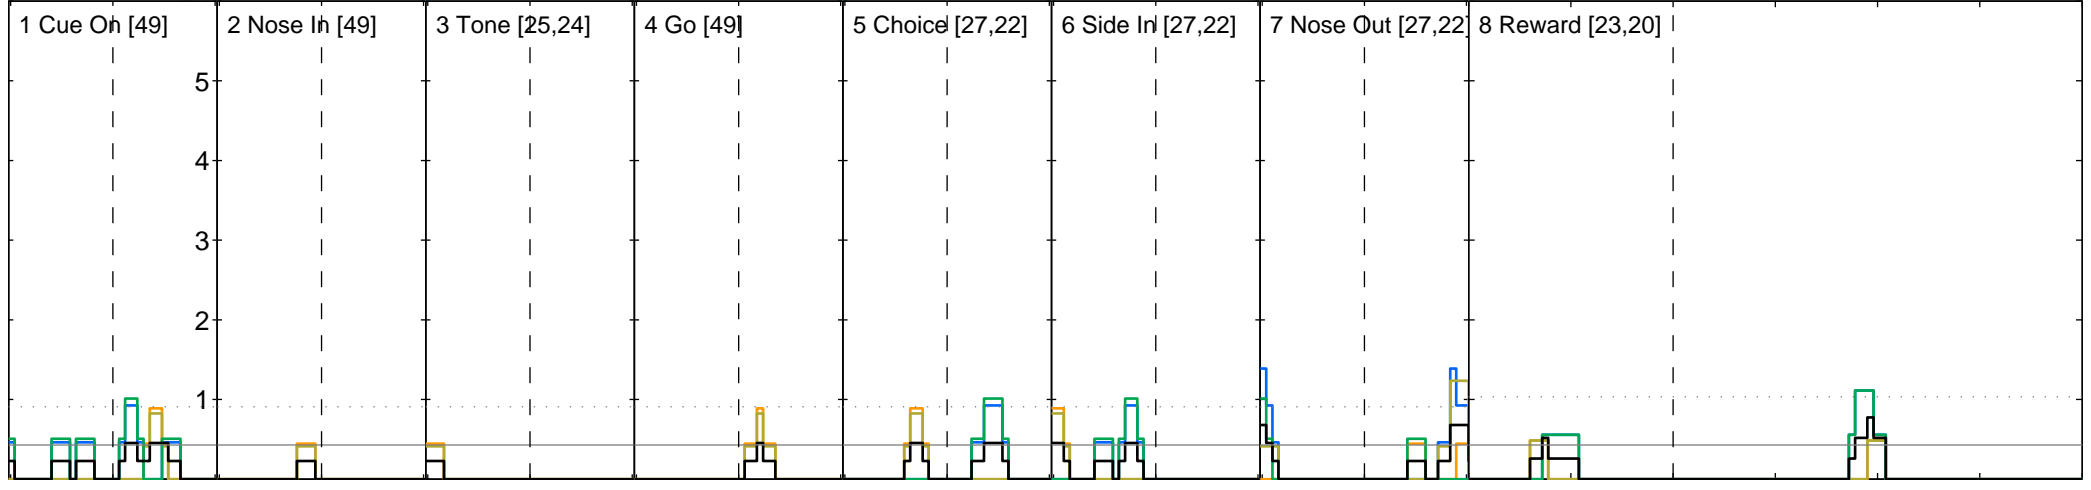

**Cell: C1220071115T03b**

AP: 3.2 ML: 2.6 DV: 2.5  
w: 4 n: 1372  $P_{ISI>2}$ : 0.96  
1/2pw: 286 $\mu$ s p->v: 803 $\mu$ s  
 $\beta_T$ : NaN  $\beta_D$ : NaN  
 $\beta_P$ : NaN SI: NaN  
Session FR: 0.213 Hz  
Pk Ev: None  
Pk FR: --

M1<sub>p</sub>

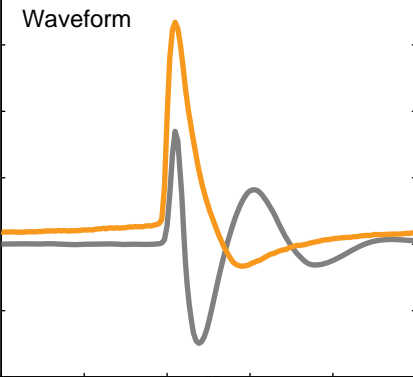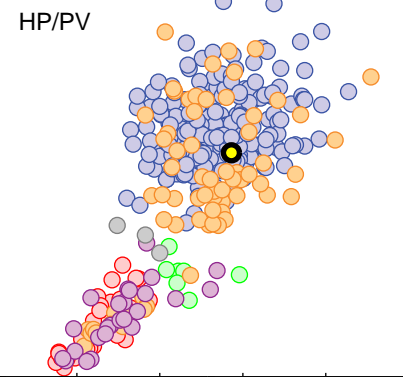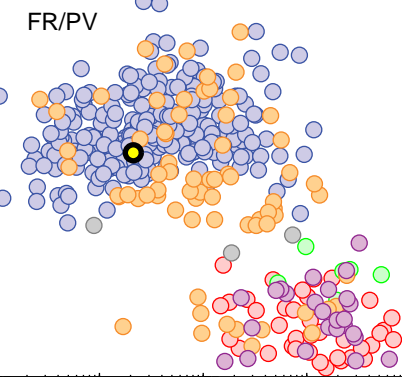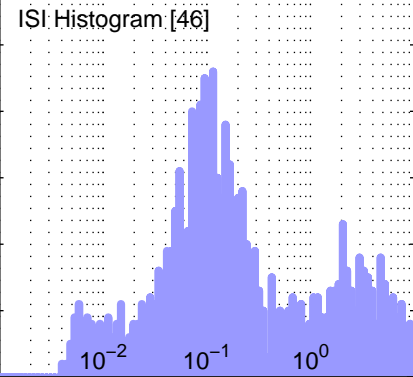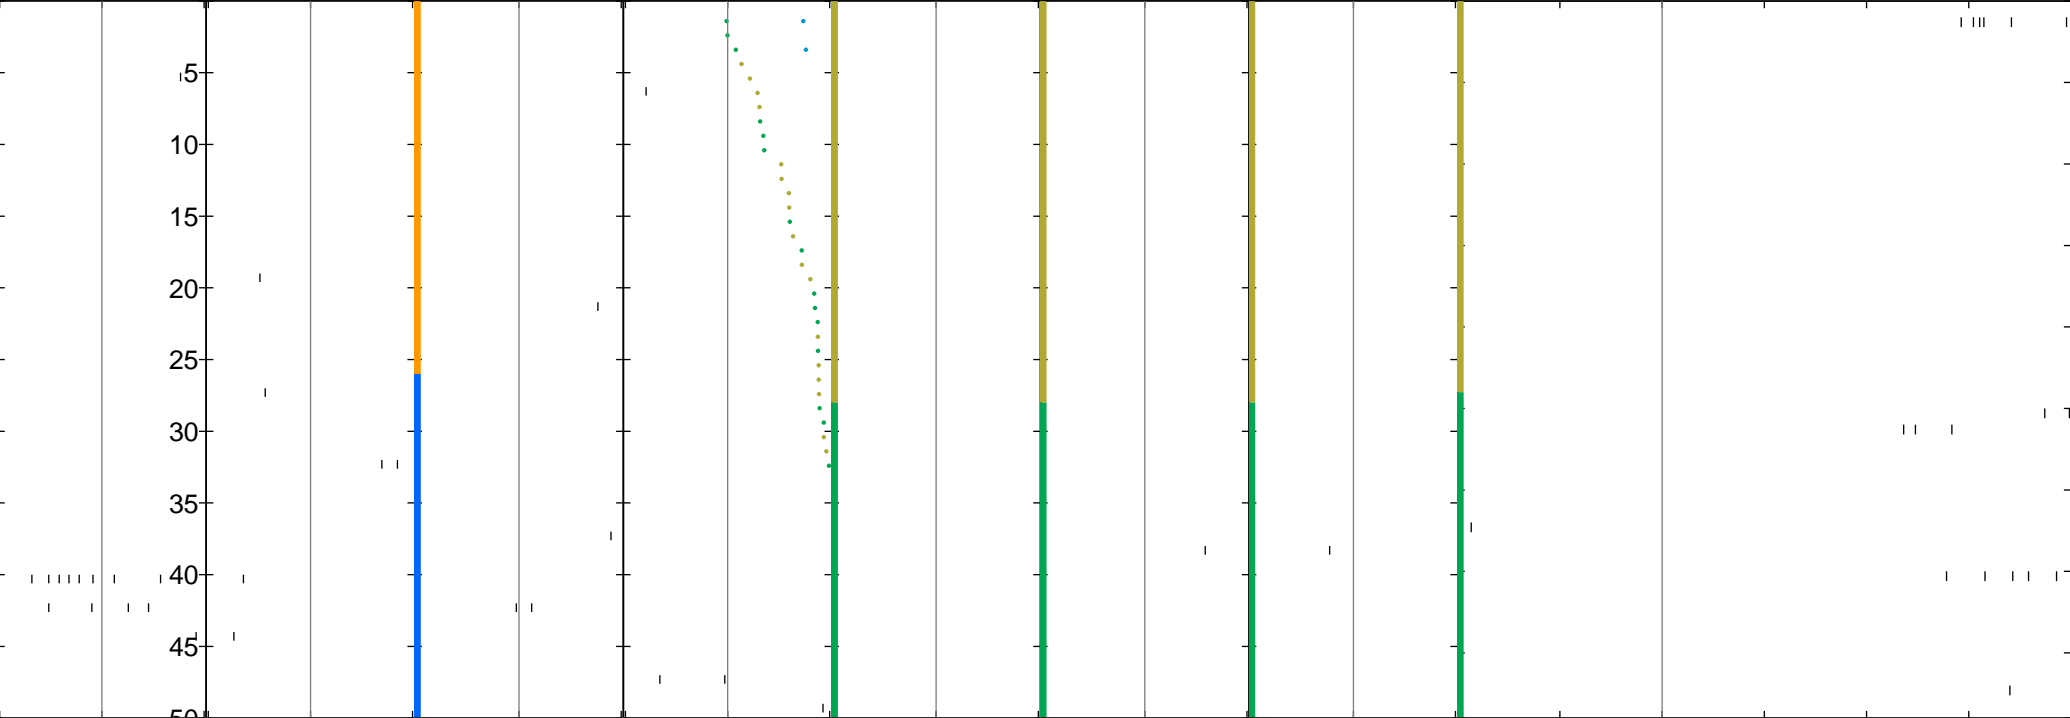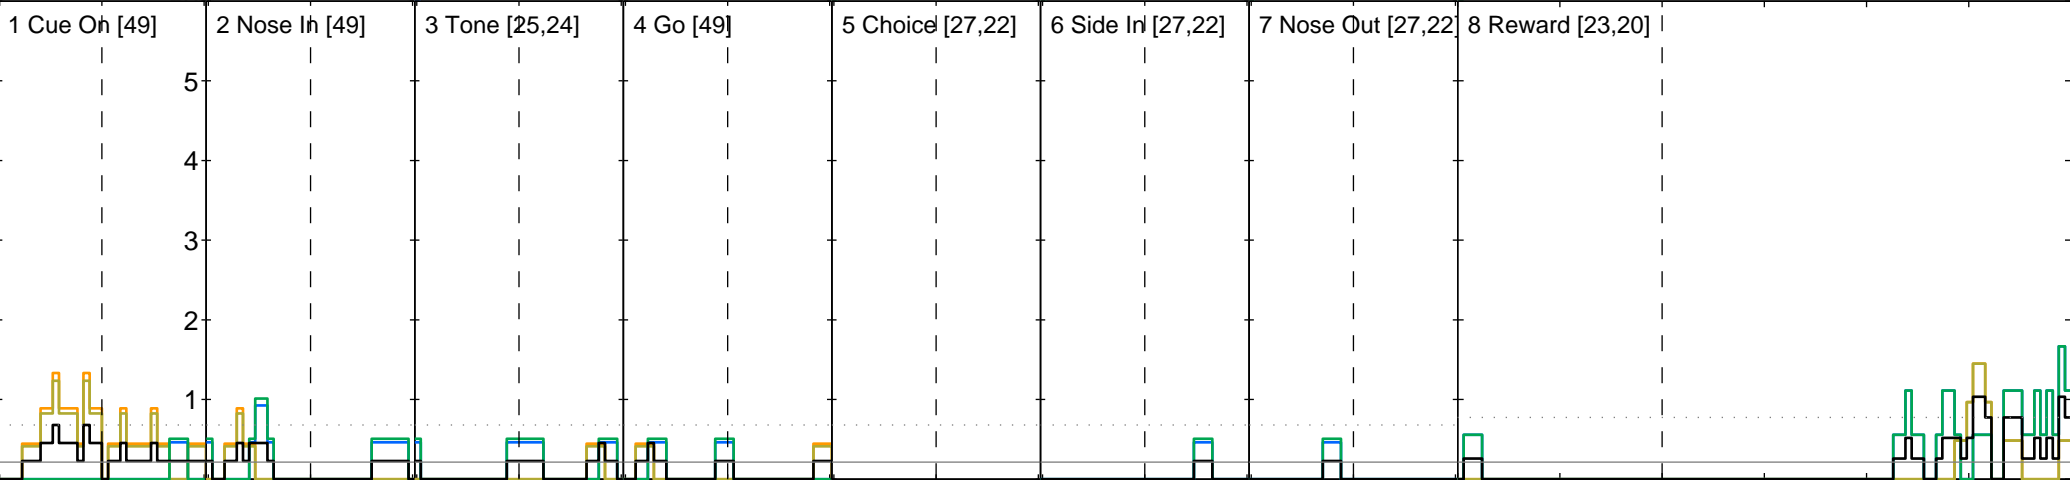

**Cell: C1220071115T03d**

AP: 3.2 ML: 2.6 DV: 2.5  
w: 4 n: 2635  $P_{ISI>2}$ : 0.91  
1/2pw: 307 $\mu$ s p->v: 736 $\mu$ s  
 $\beta_T$ : NaN  $\beta_D$ : NaN  
 $\beta_P$ : NaN SI: NaN  
Session FR: 0.374 Hz  
Pk Ev: None  
Pk FR: --

M1<sub>p</sub>

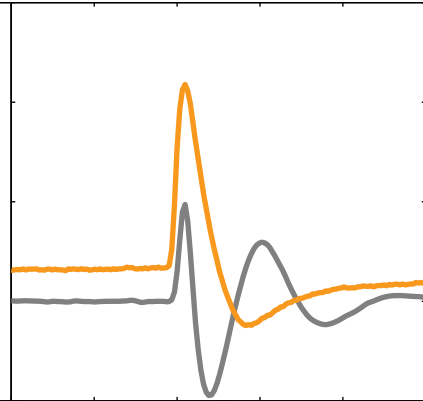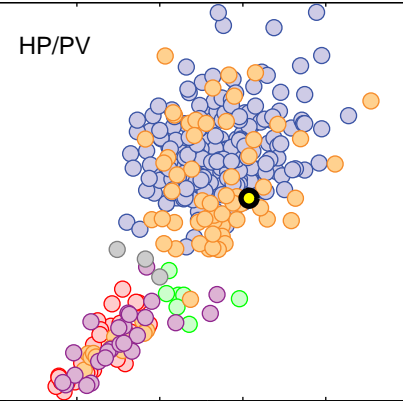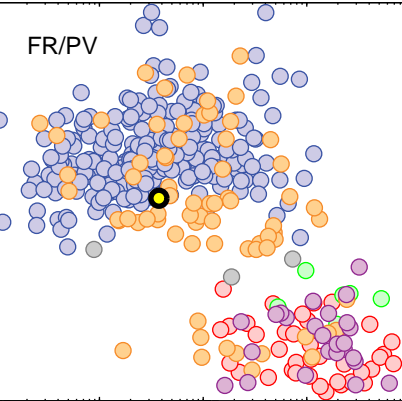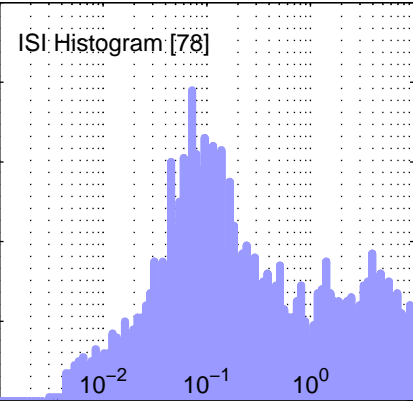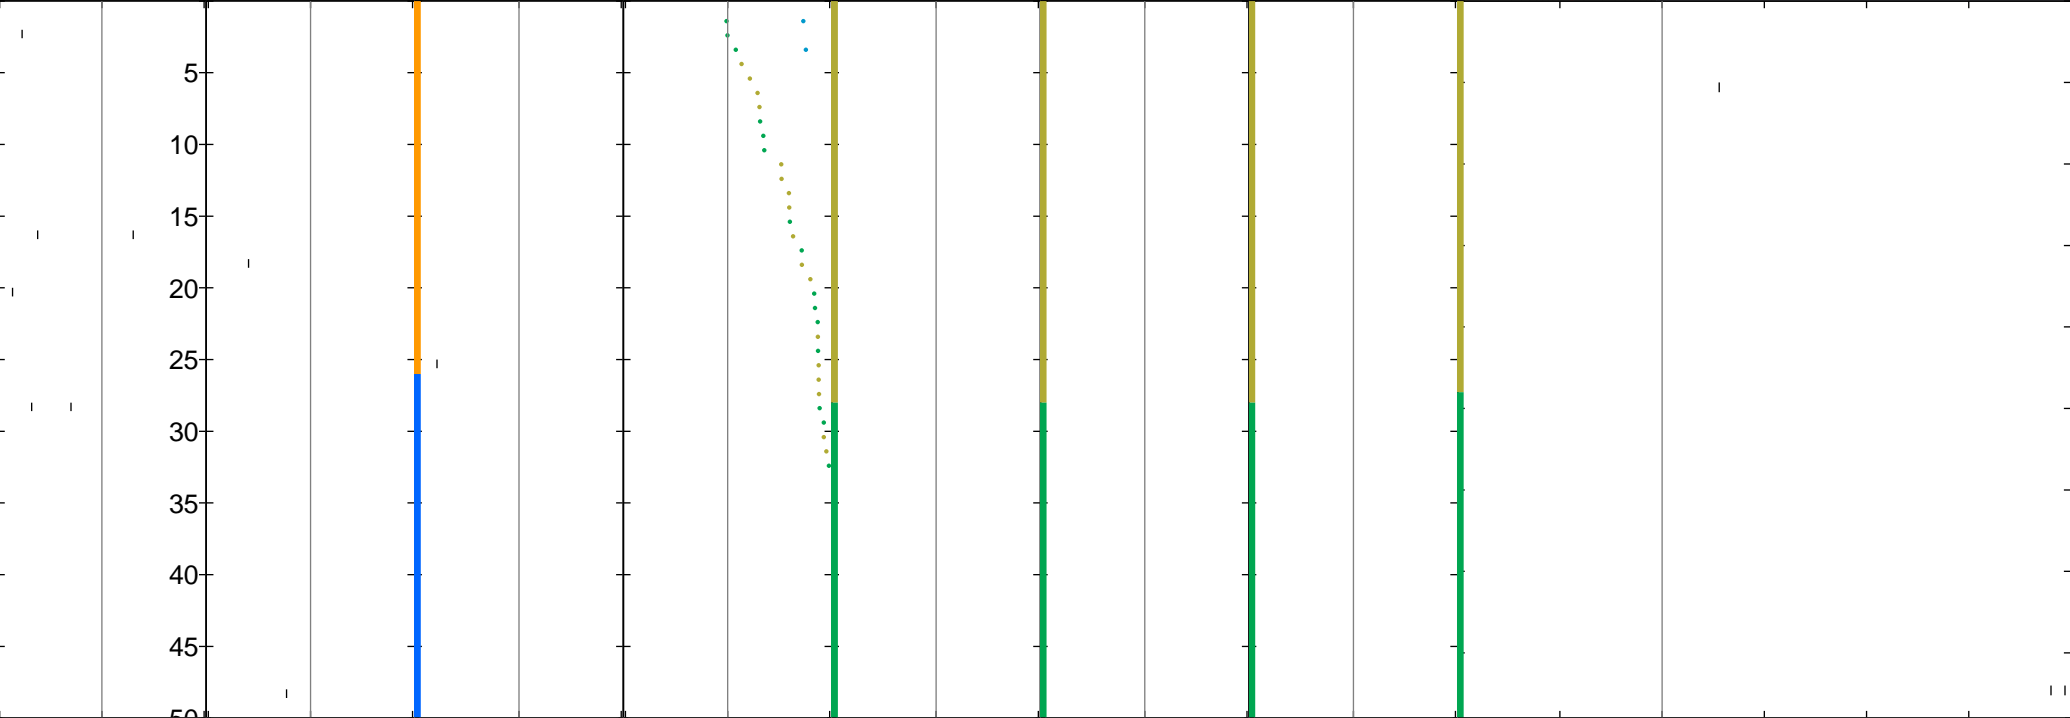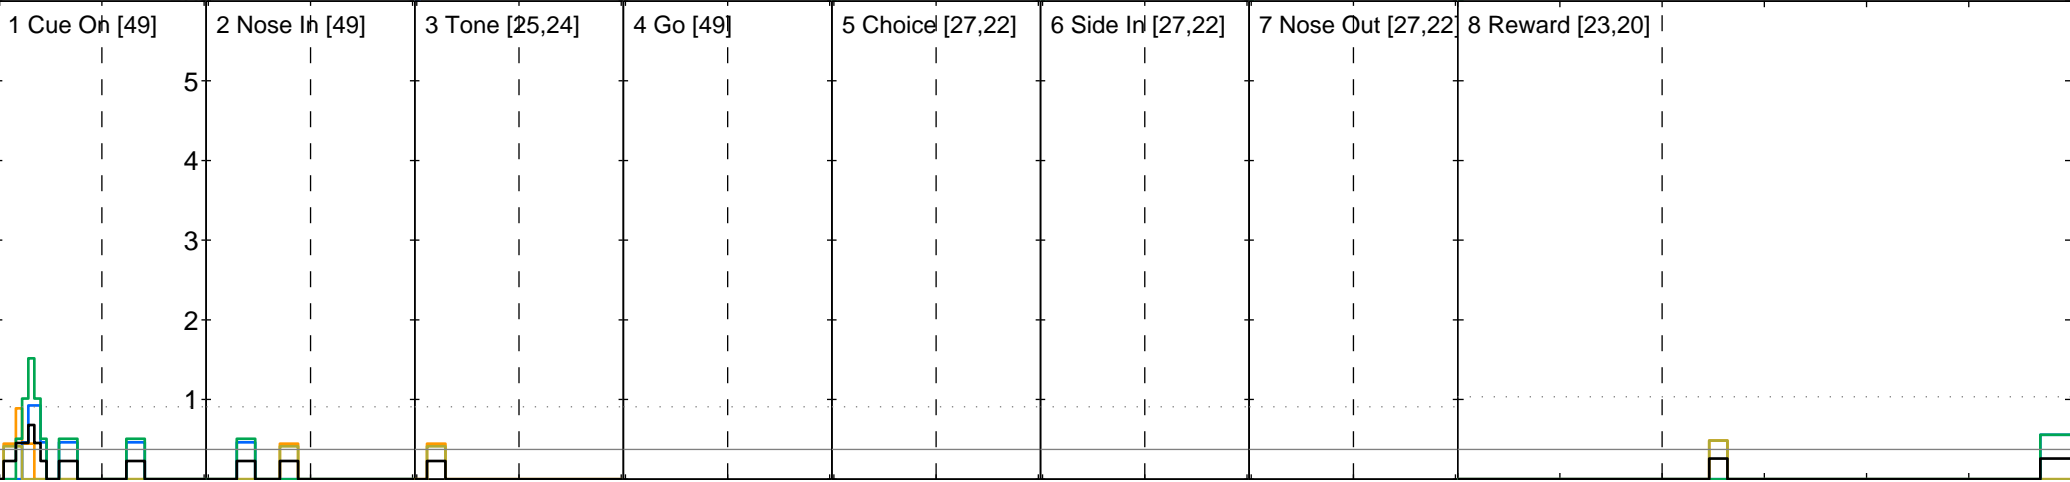

**Cell: C1220071027T03b**

AP: 3.2 ML: 2.6 DV: 2.2

w: 1 n: 58182  $P_{ISI>2}$ : 0.0571/2pw: 146 $\mu$ s p->v: 301 $\mu$ s $\beta_T$ : 4.5  $\beta_D$ : -5.6 $\beta_P$ : -2.8 SI: 0.42

Session FR: 9.7 Hz

Pk Ev: 1 - Cue on (Contra)

Pk FR: 14.5Hz (-0.68s) **M1<sub>I</sub>**

Waveform

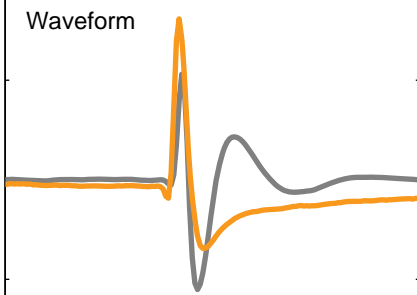

HP/PV

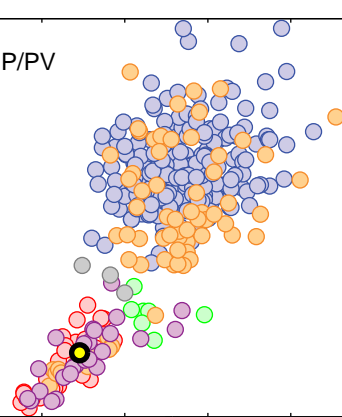

FR/PV

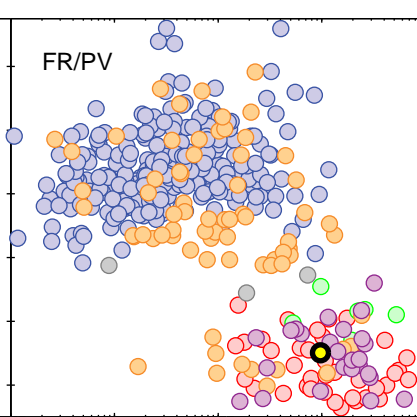

ISI Histogram [2184]

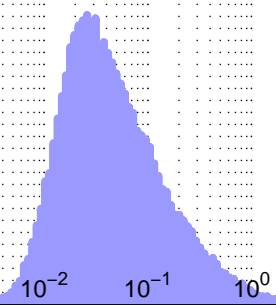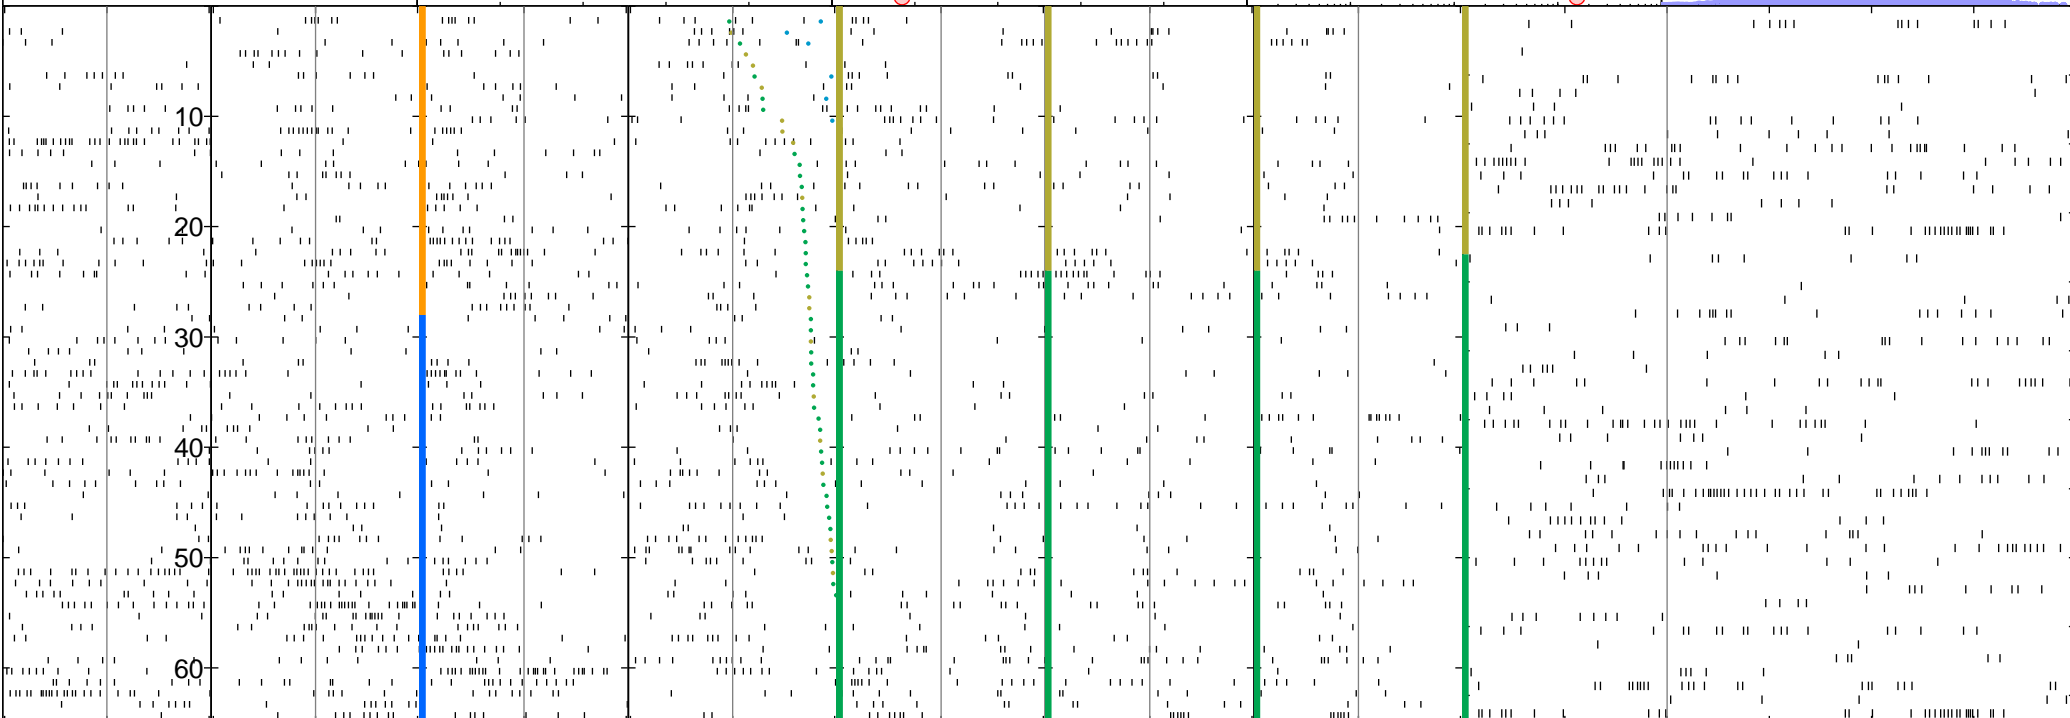

1 Cue On [64]

2 Nose In [64]

3 Tone [27,37]

4 Go [64]

5 Choice [23,41]

6 Side In [23,41]

7 Nose Out [23,41]

8 Reward [17,34]

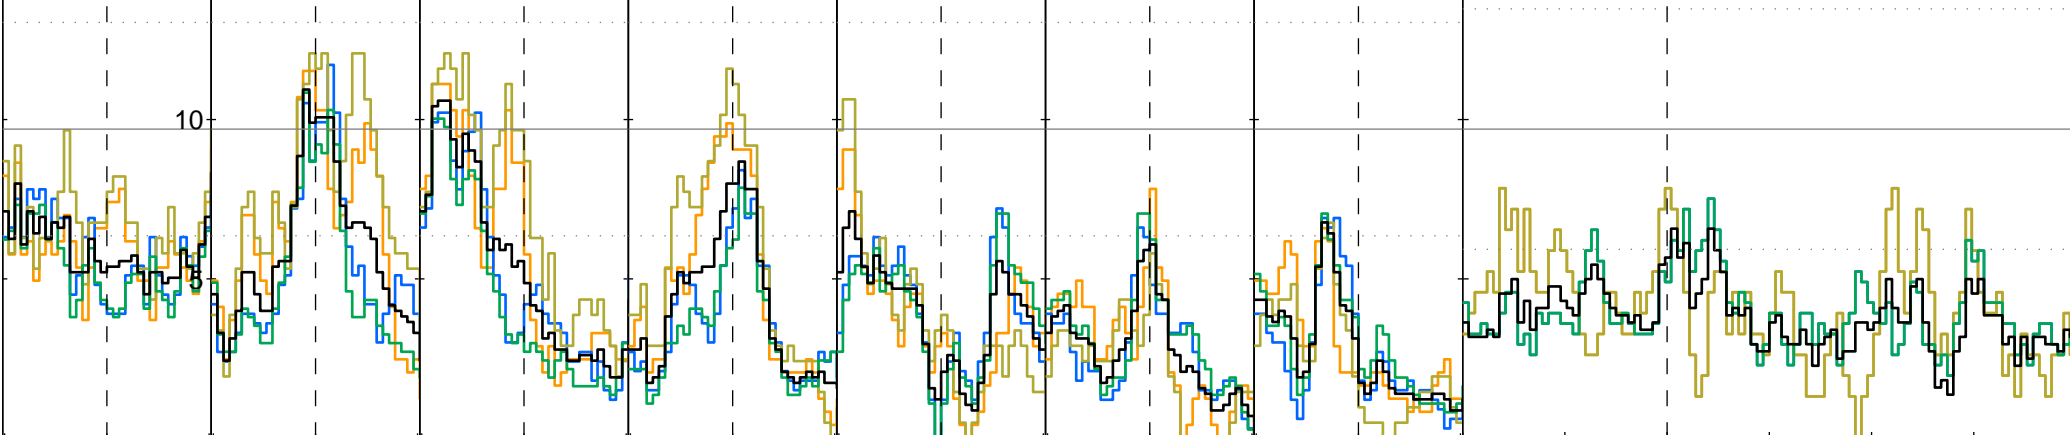

**Cell: C1220071114T02a**

AP: 3.7 ML: 3.5 DV: 2.1

w: 3 n: 5801  $P_{ISI>2}$ : 0.571/2pw: 165 $\mu$ s p->v: 299 $\mu$ s $\beta_T$ : 0.7  $\beta_D$ : -0.58 $\beta_P$ : 1.3 SI: NaN

Session FR: 0.951 Hz

Pk Ev: 2 - Nose in (Ipsi)

Pk FR: 5.85Hz (1.02s) **M1<sub>I</sub>**

Waveform

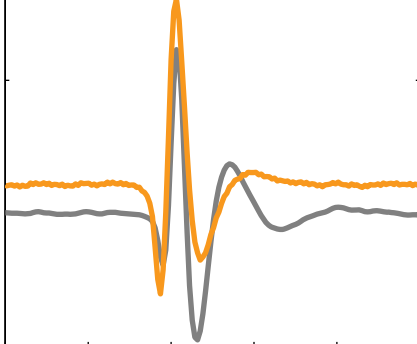

HP/PV

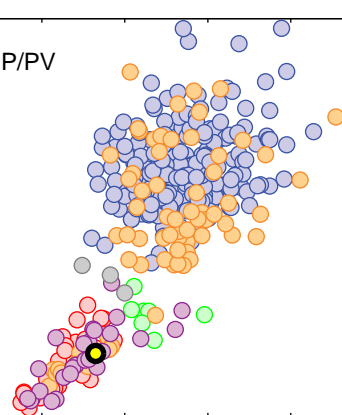

FR/PV

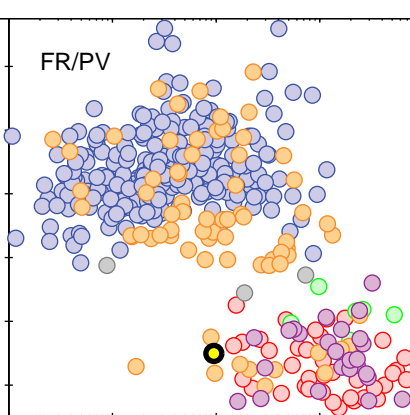

ISI Histogram [156]

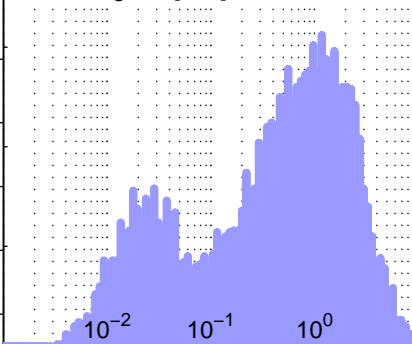

10

20

30

40

50

60

70

80

1 Cue On [80]

2 Nose In [80]

3 Tone [43,37]

4 Go [80]

5 Choice [42,38]

6 Side In [42,38]

7 Nose Out [42,38]

8 Reward [39,34]

5

4

3

2

1

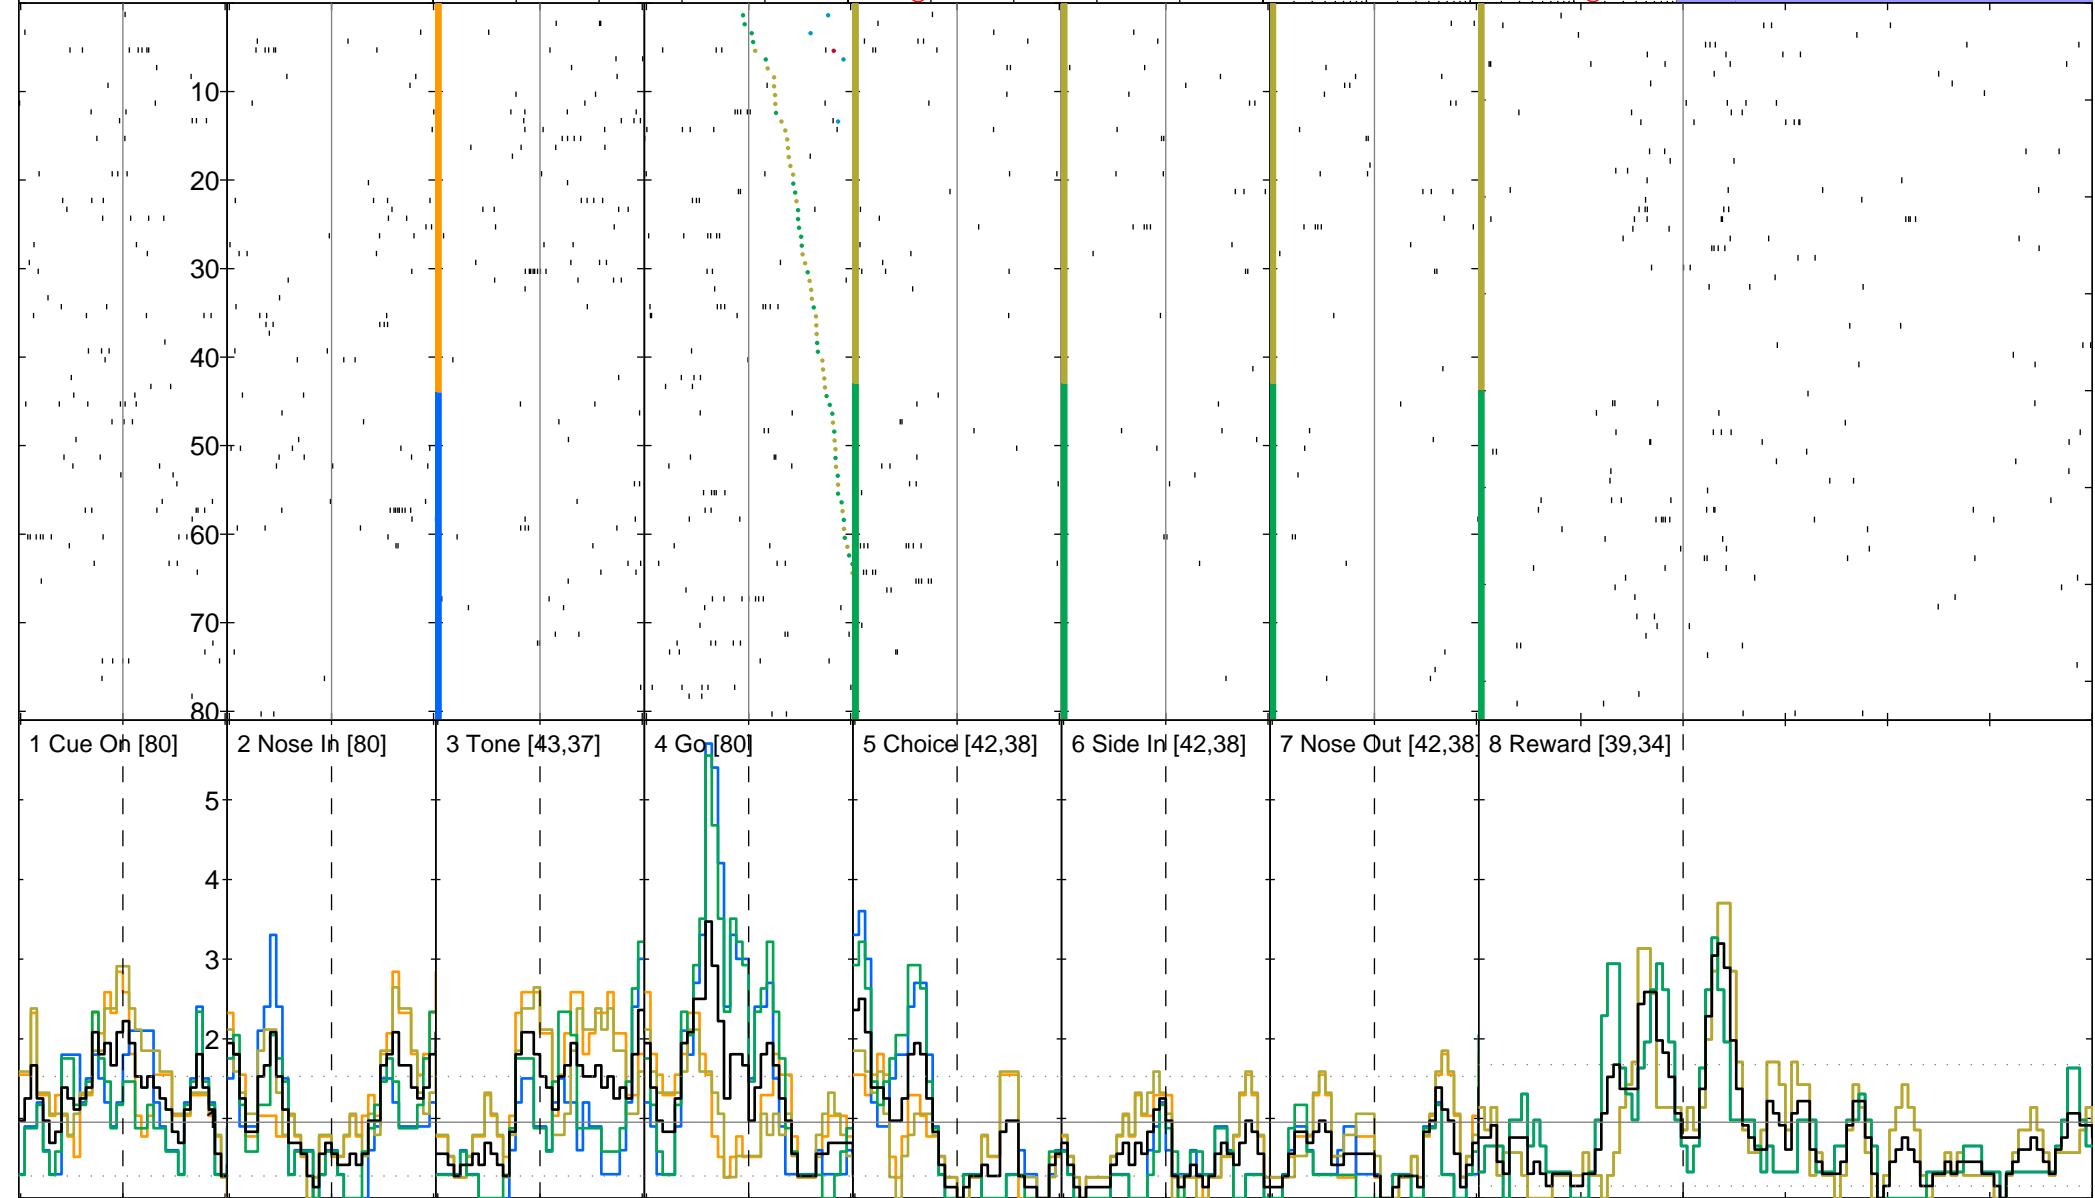

Cell: C1220071114T03c

AP: 3.2 ML: 2.6 DV: 2.4

w: 1 n: 148317  $P_{ISI>2}$ : 0

1/2pw: 237 $\mu$ s p->v: 419 $\mu$ s

$\beta_T$ : 1.6  $\beta_D$ : 7

$\beta_P$ : 3.1 SI: 0.42

Session FR: 24.3 Hz

Pk Ev: 5 - Choice (Ipsi)

Pk FR: 53.8Hz (0.00s) **M1<sub>I</sub>**

Waveform

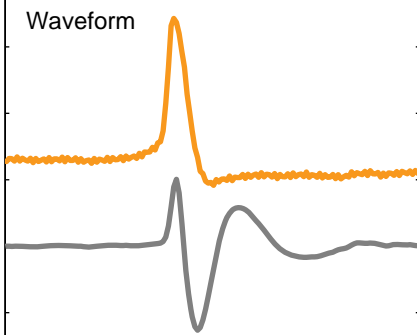

HP/PV

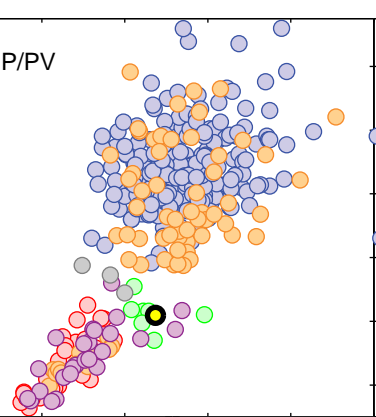

FR/PV

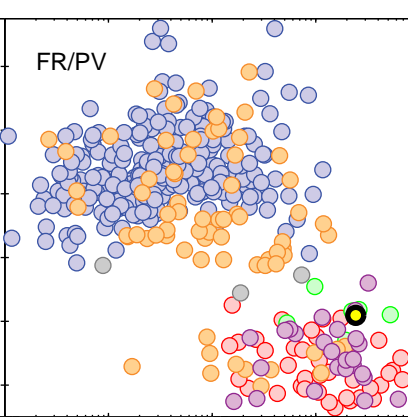

ISI Histogram [5449]

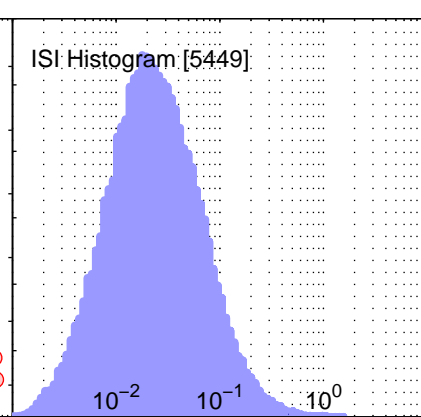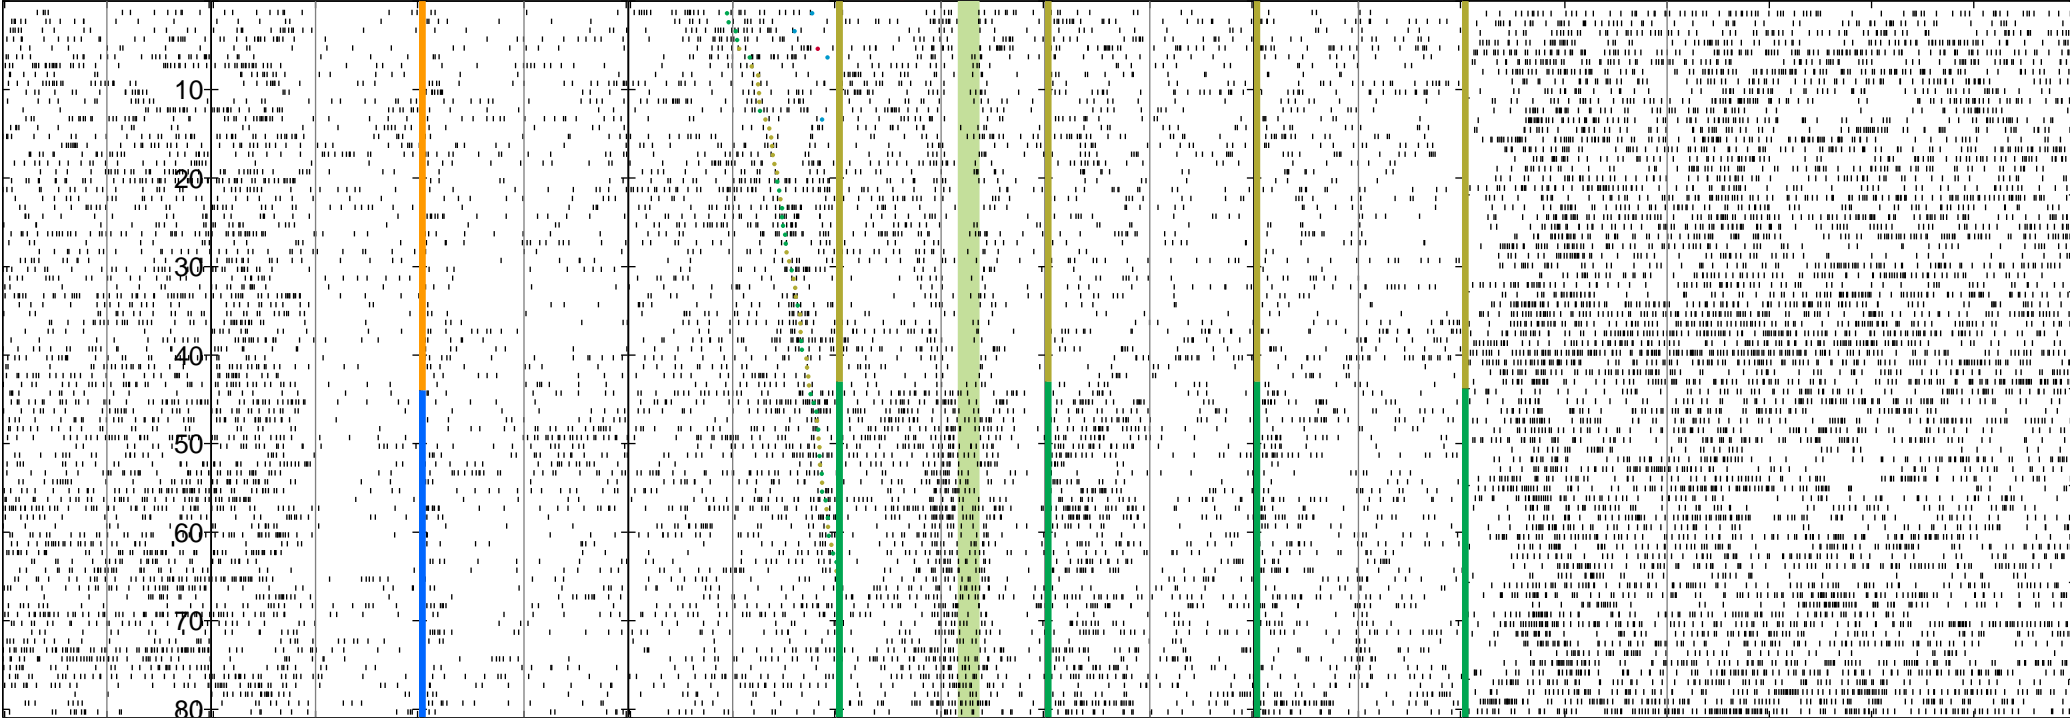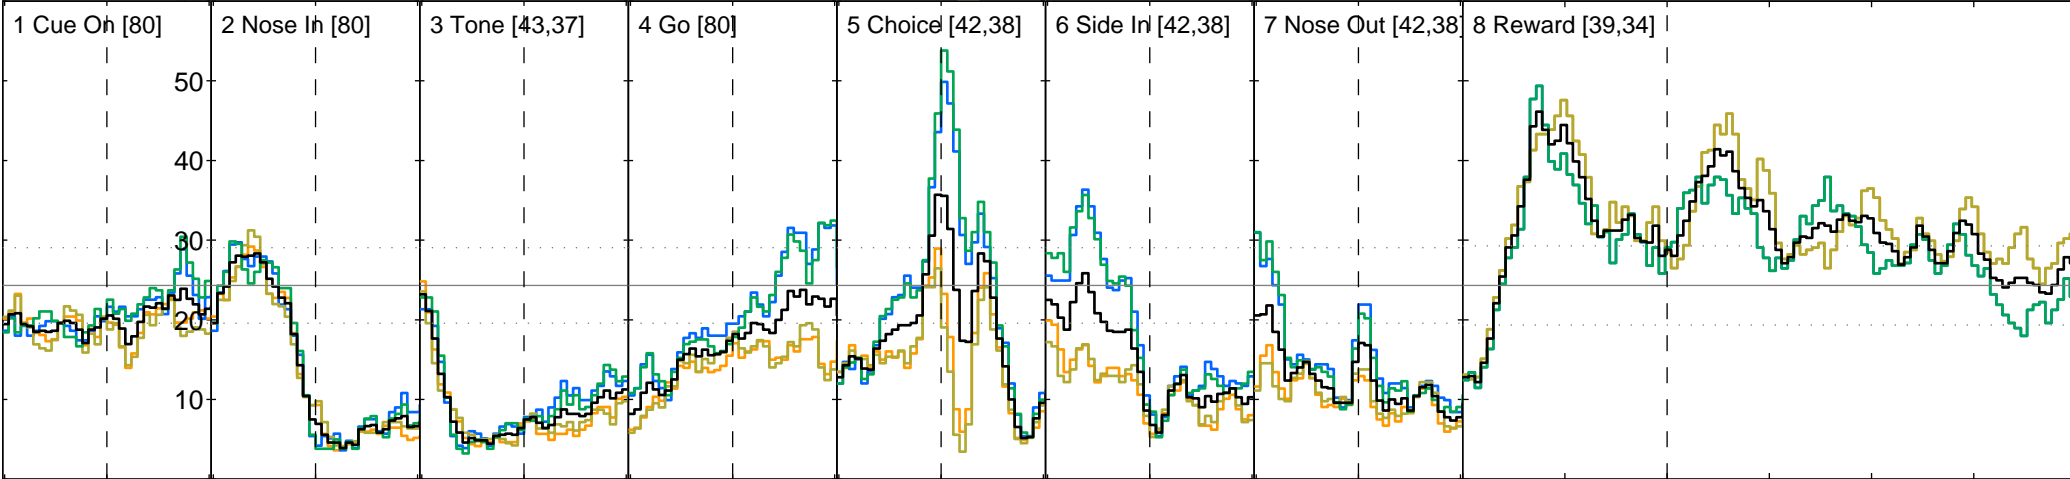



**Cell: C1220071117T02a**

AP: 3.7 ML: 3.5 DV: 2.5

w: 3 n: 30399  $P_{ISI>2}$ : 0.421/2pw: 109 $\mu$ s p $\rightarrow$ v: 197 $\mu$ s $\beta_T$ : 2.2  $\beta_D$ : -4.2 $\beta_P$ : -3.6 SI: -0.78

Session FR: 2.96 Hz

Pk Ev: 5 - Choice (Contra)

Pk FR: 14.3Hz (0.15s) **M1<sub>I</sub>**

Waveform

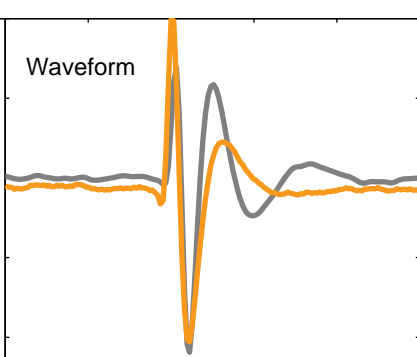

HP/PV

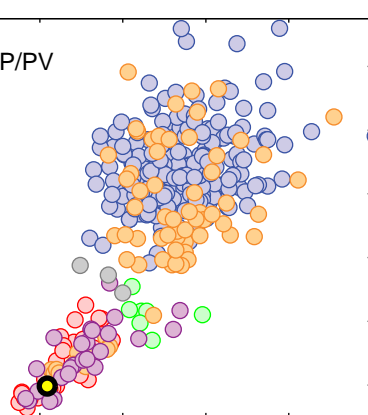

FR/PV

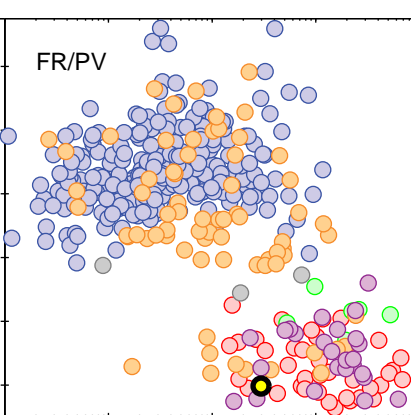

ISI Histogram [872]

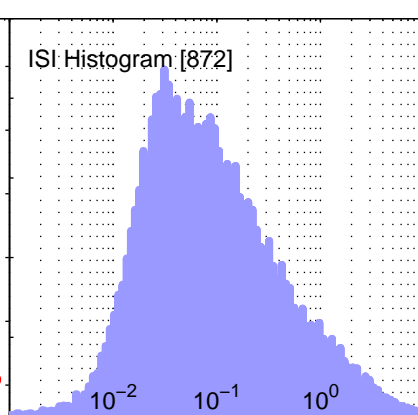

10

20

30

40

50

60

70

80

90

1 Cue On [92]

2 Nose In [92]

3 Tone [50,42]

4 Go [92]

5 Choice [45,47]

6 Side In [45,47]

7 Nose Out [45,47]

8 Reward [40,37]

10

5

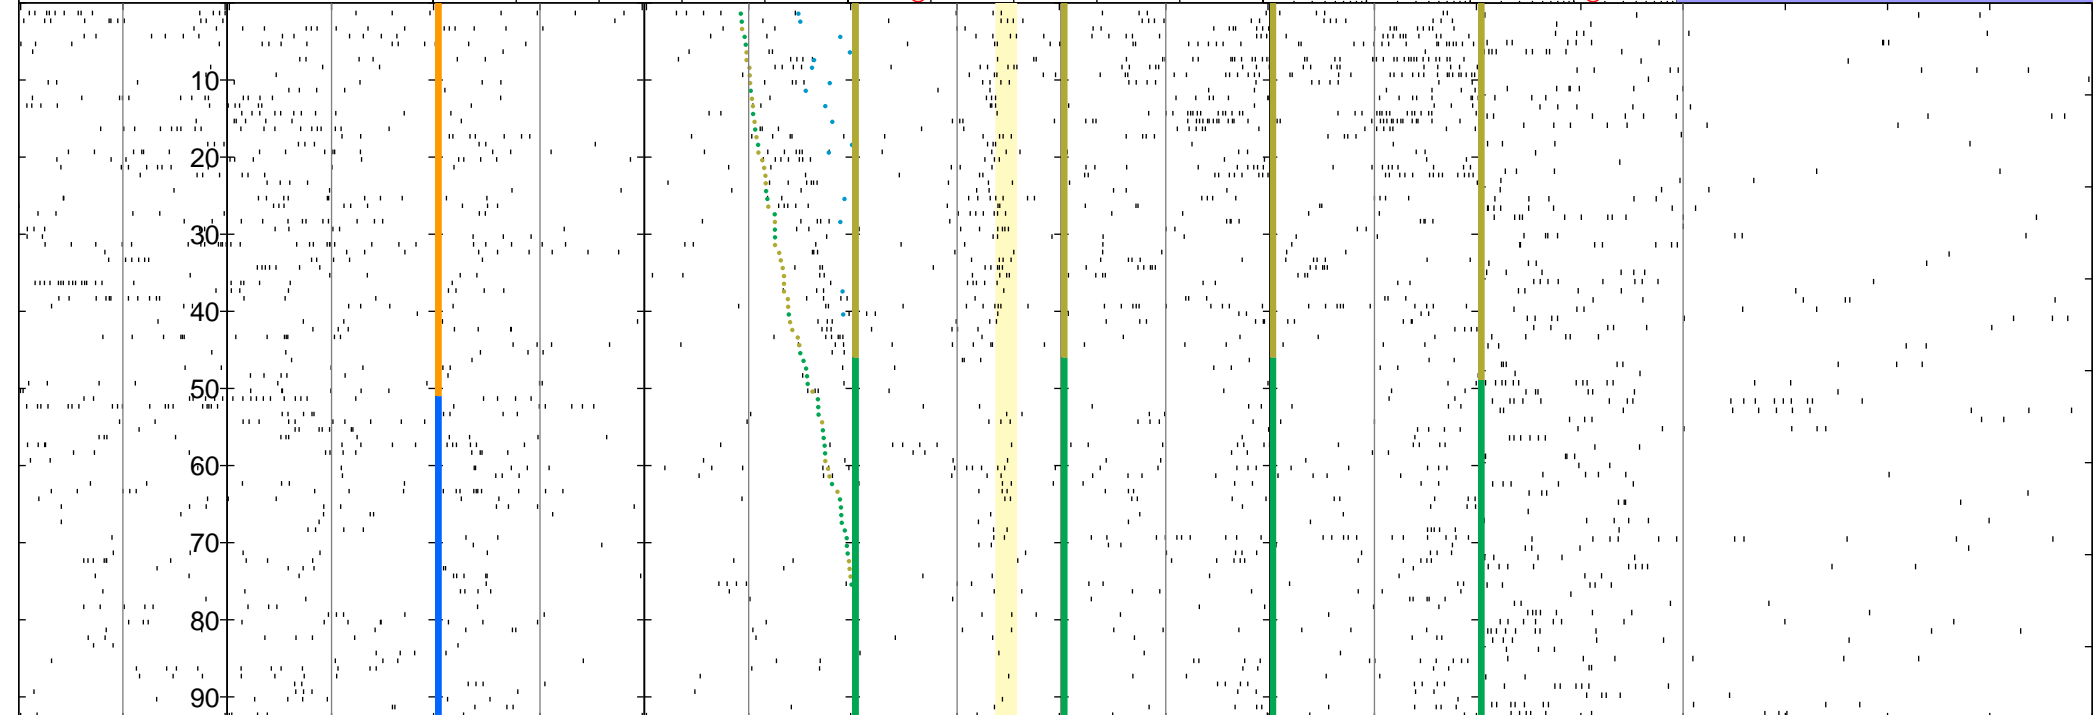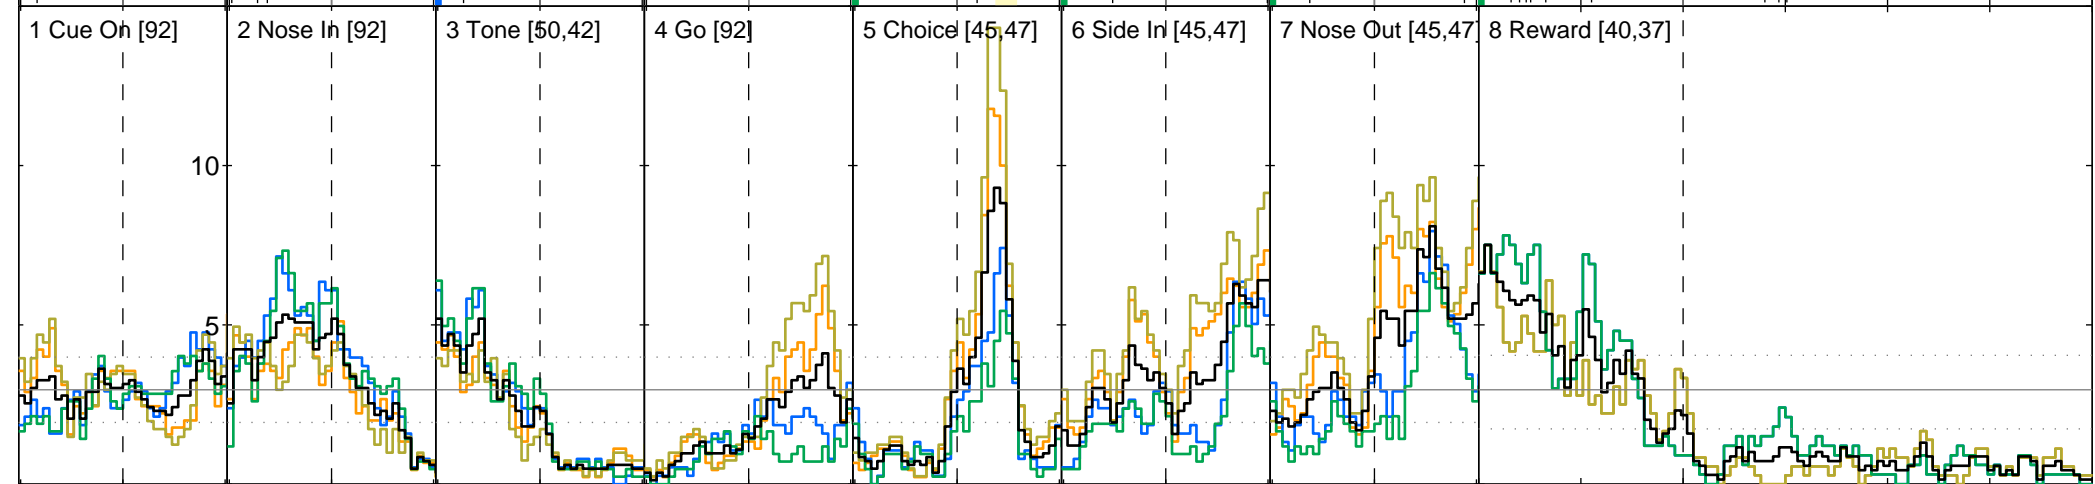

**Cell: C1220071115T03c**

AP: 3.2 ML: 2.6 DV: 2.5

w: 2 n: 26032  $P_{ISI>2}$ : 0.39

1/2pw: 114 $\mu$ s p $\rightarrow$ v: 248 $\mu$ s

$\beta_T$ : NaN  $\beta_D$ : NaN

$\beta_P$ : NaN SI: NaN

Session FR: 3.69 Hz

Pk Ev: 5 - Choice (Ipsi)

Pk FR: 5.56Hz (0.36s) **M1<sub>I</sub>**

Waveform

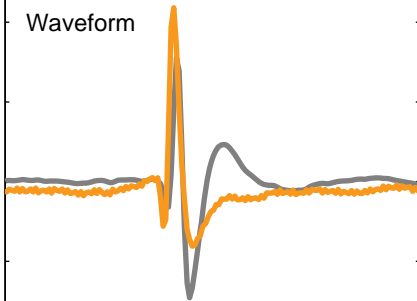

HP/PV

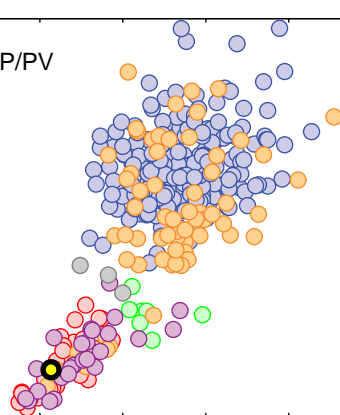

FR/PV

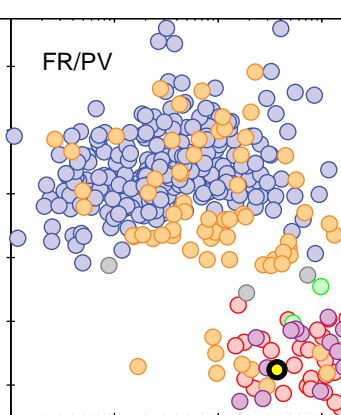

ISI Histogram [586]

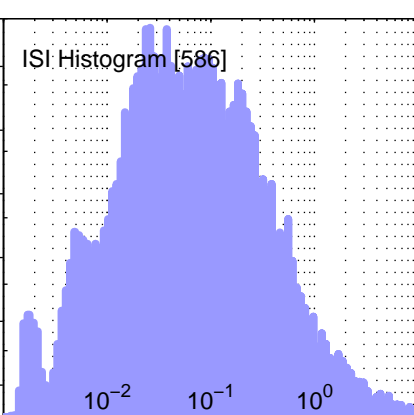

5  
10  
15  
20  
25  
30  
35  
40  
45  
50

1 Cue On [49]

2 Nose In [49]

3 Tone [25,24]

4 Go [49]

5 Choice [27,22]

6 Side In [27,22]

7 Nose Out [27,22]

8 Reward [23,20]

5  
4  
3  
2

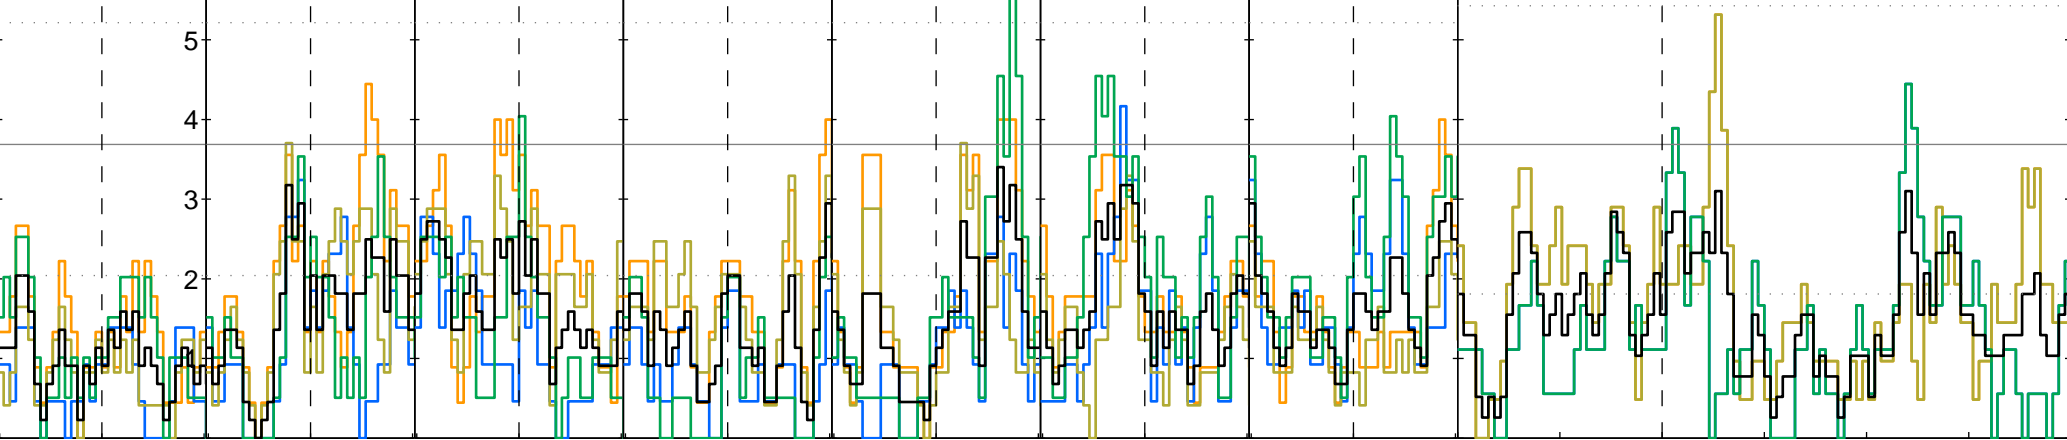

**Cell: C0420070227T02b**

AP: 3.7 ML: 2.8 DV: 3  
w: 3 n: 5335  $P_{ISI>2}$ : 0.73  
1/2pw: 117 $\mu$ s p->v: 237 $\mu$ s  
 $\beta_T$ : NaN  $\beta_D$ : NaN  
 $\beta_P$ : NaN SI: NaN  
Session FR: 0.974 Hz  
Pk Ev: None  
Pk FR: --

M1<sub>I</sub>

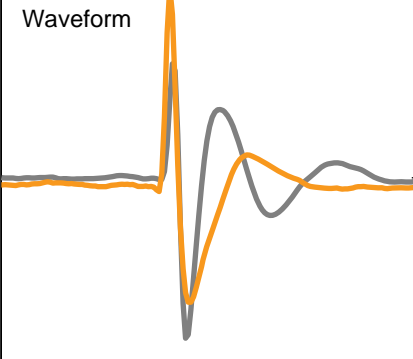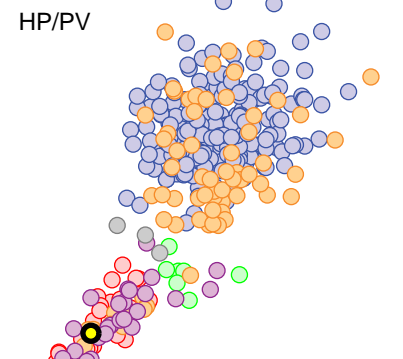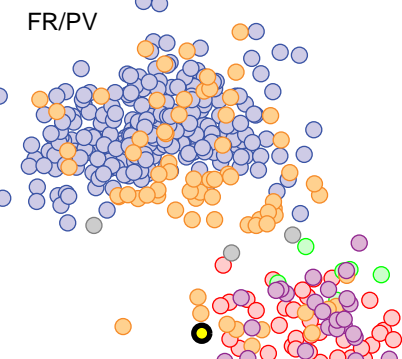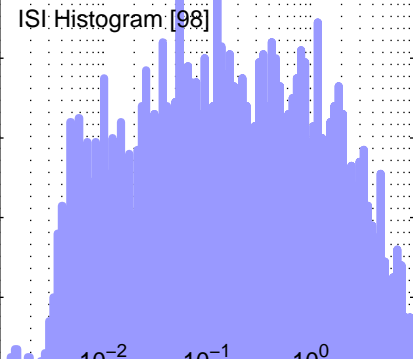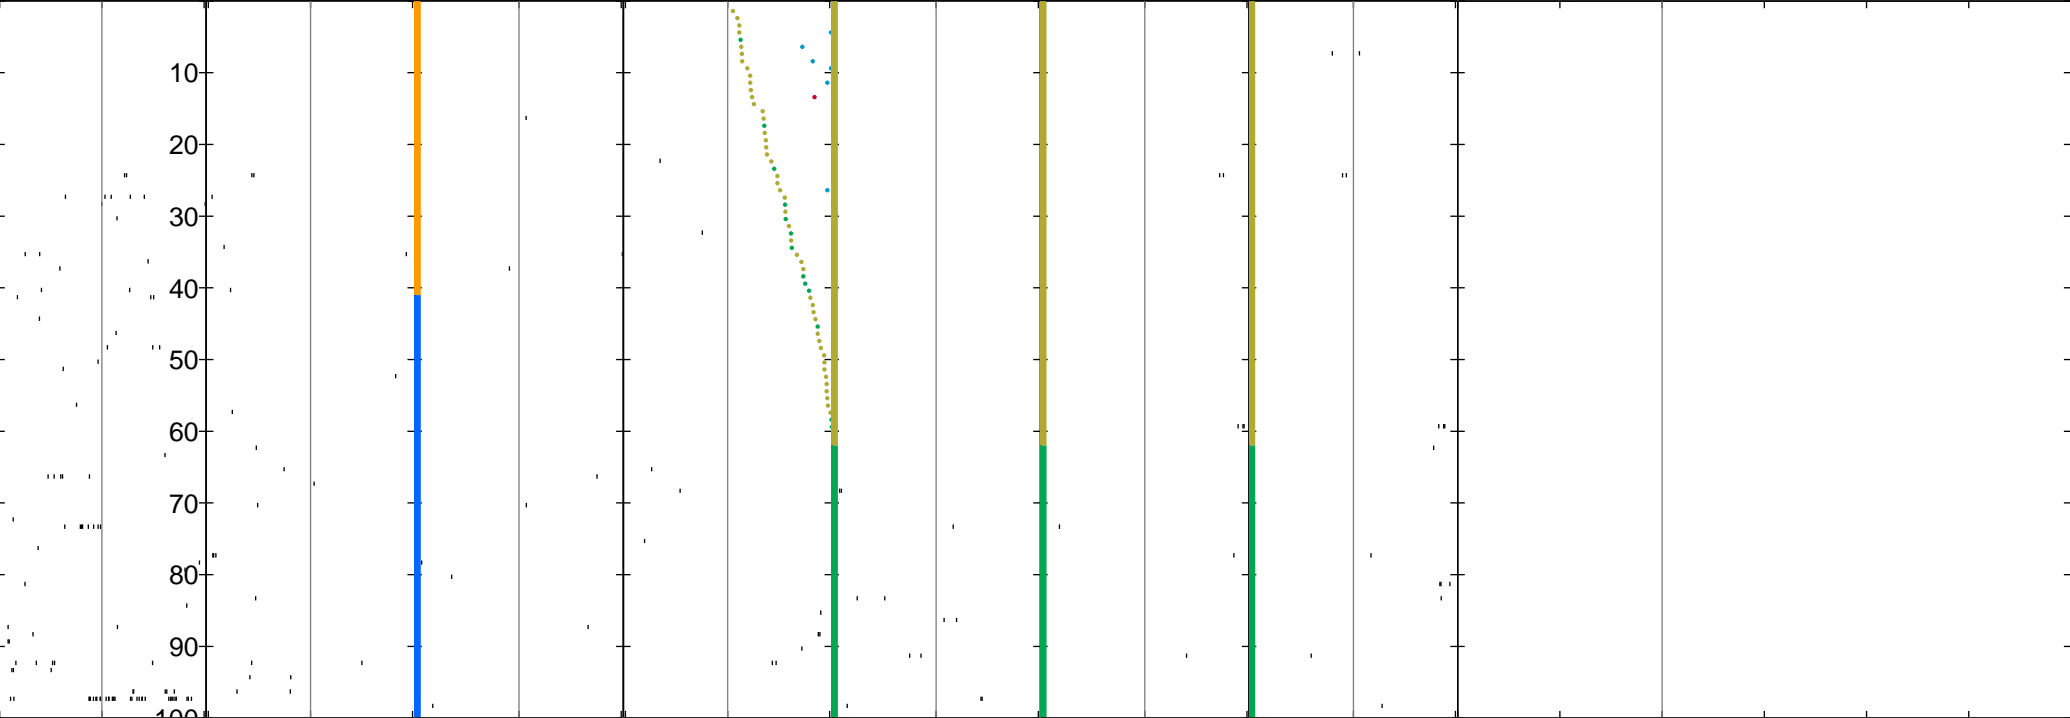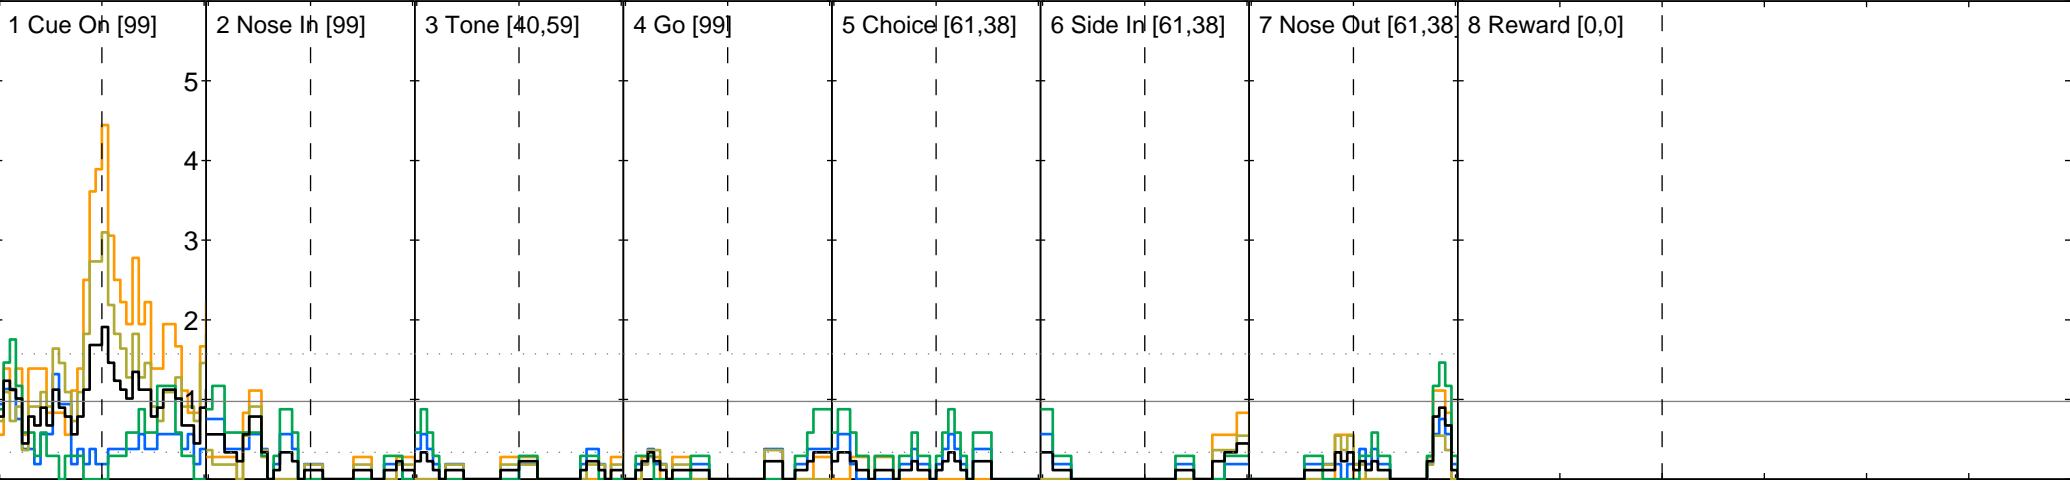

**Cell: C1220071025T02a**

AP: 3.7 ML: 3.5 DV: 1.8

w: 3 n: 14118  $P_{ISI>2}$ : 0.38

1/2pw: 120 $\mu$ s p $\rightarrow$ v: 250 $\mu$ s

$\beta_T$ : -1.8  $\beta_D$ : -3.4

$\beta_P$ : -2 SI: -0.74

Session FR: 2.09 Hz

Pk Ev: 8 - Reward (T2/Ipsi)

Pk FR: 29.5Hz (-0.37s) **M1<sub>I</sub>**

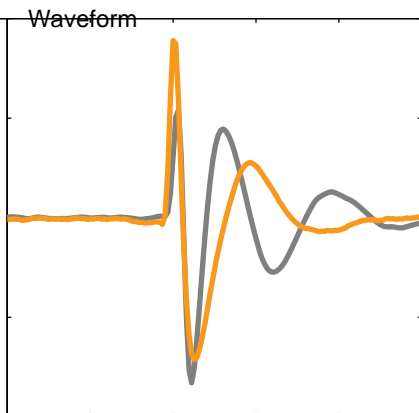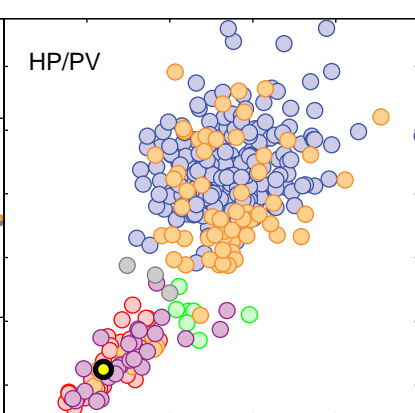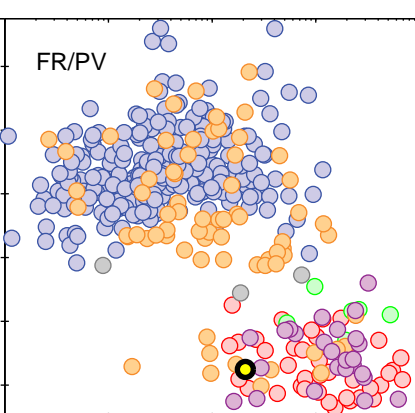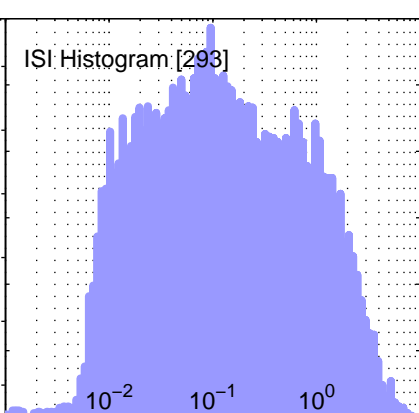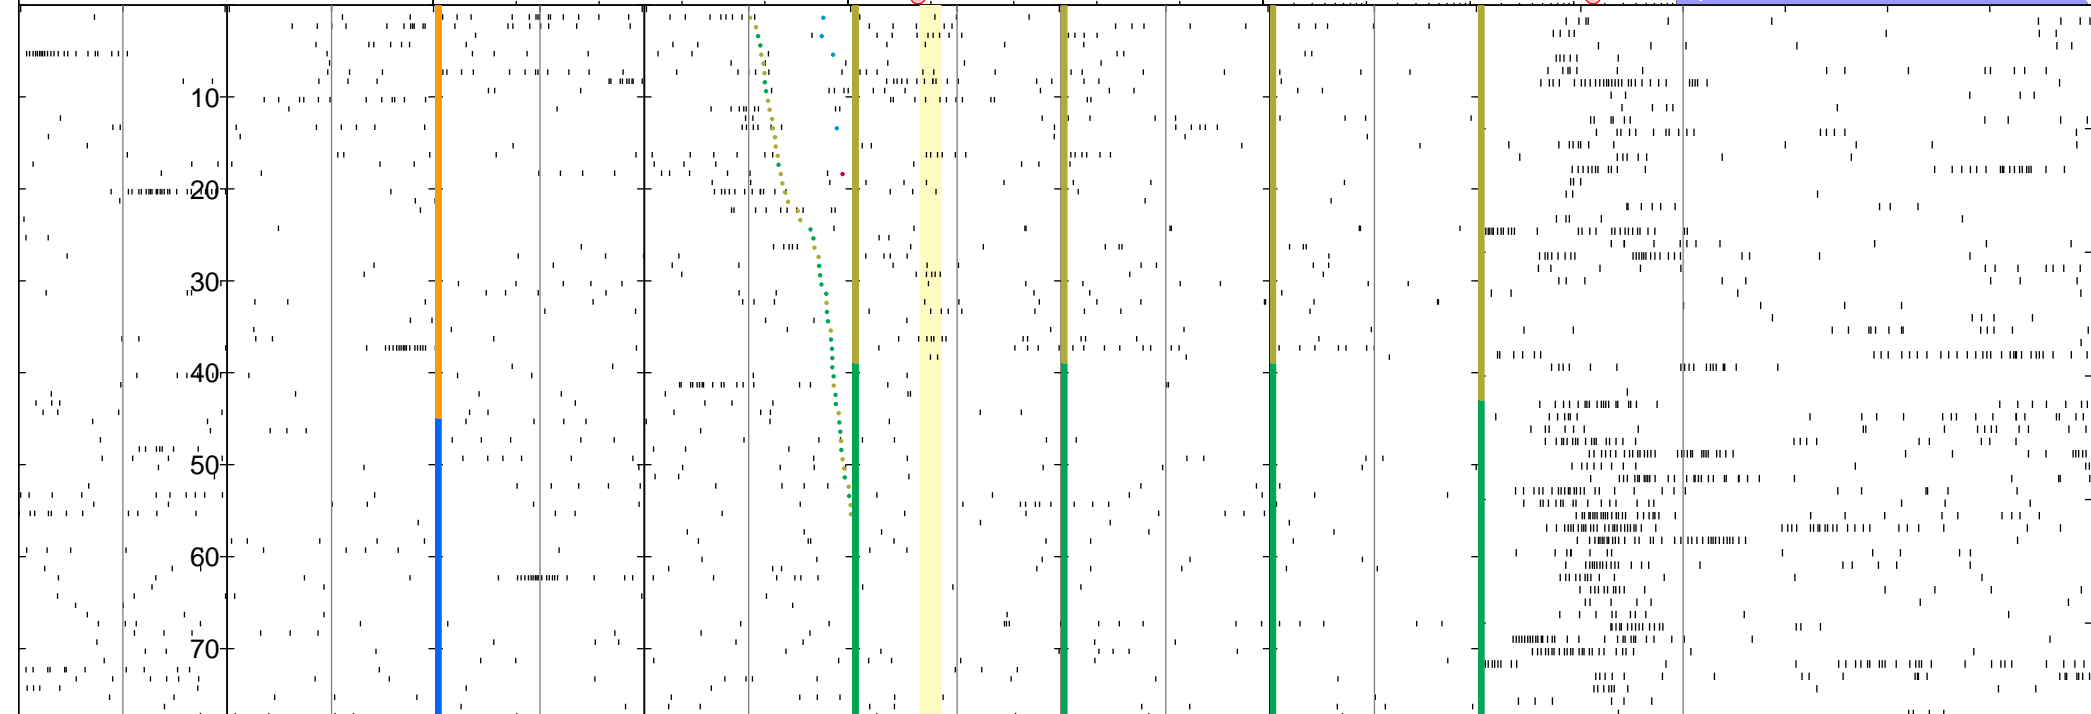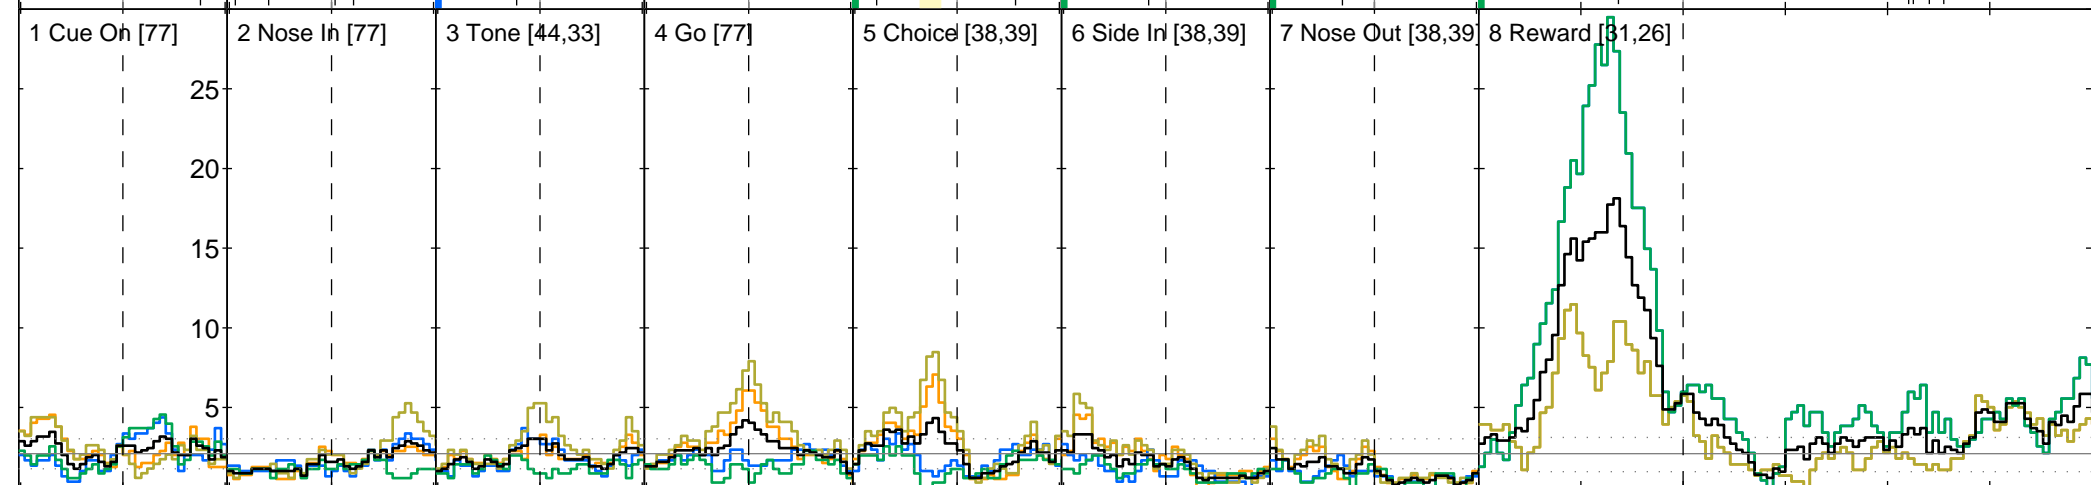

**Cell: C1220071115T02a**

AP: 3.7 ML: 3.5 DV: 2.3

w: 3 n: 12000  $P_{ISI>2}$ : 0.351/2pw: 141 $\mu$ s p->v: 266 $\mu$ s $\beta_T$ : 2.2  $\beta_D$ : 2.1 $\beta_P$ : 2.4 SI: 0.39

Session FR: 1.7 Hz

Pk Ev: 8 - Reward (T2/Ipsi)

Pk FR: 17.2Hz (-0.31s) **M1<sub>I</sub>**

Waveform

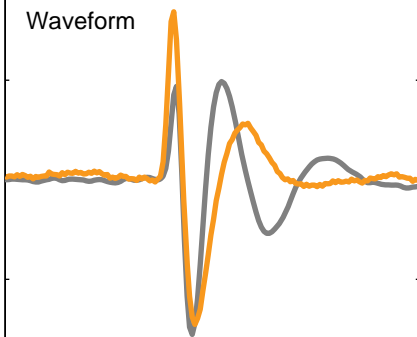

HP/PV

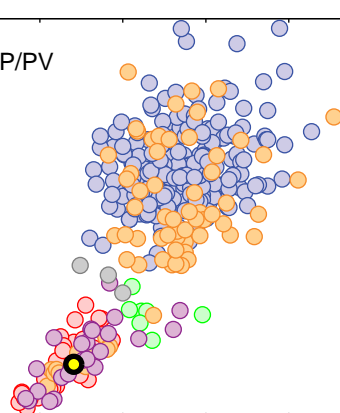

FR/PV

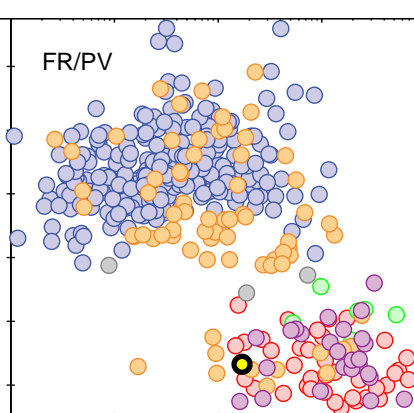

ISI Histogram [305]

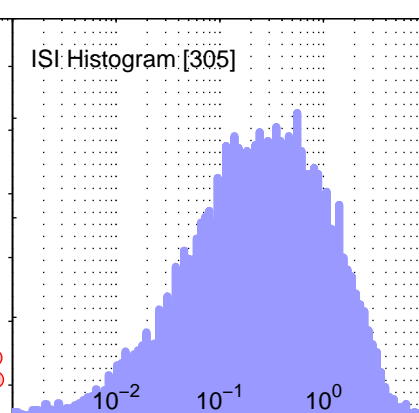5  
10  
15  
20  
25  
30  
35  
40  
45  
50

1 Cue On [49] 2 Nose In [49] 3 Tone [25,24] 4 Go [49] 5 Choice [27,22] 6 Side In [27,22] 7 Nose Out [27,22] 8 Reward [23,20]

15  
10  
5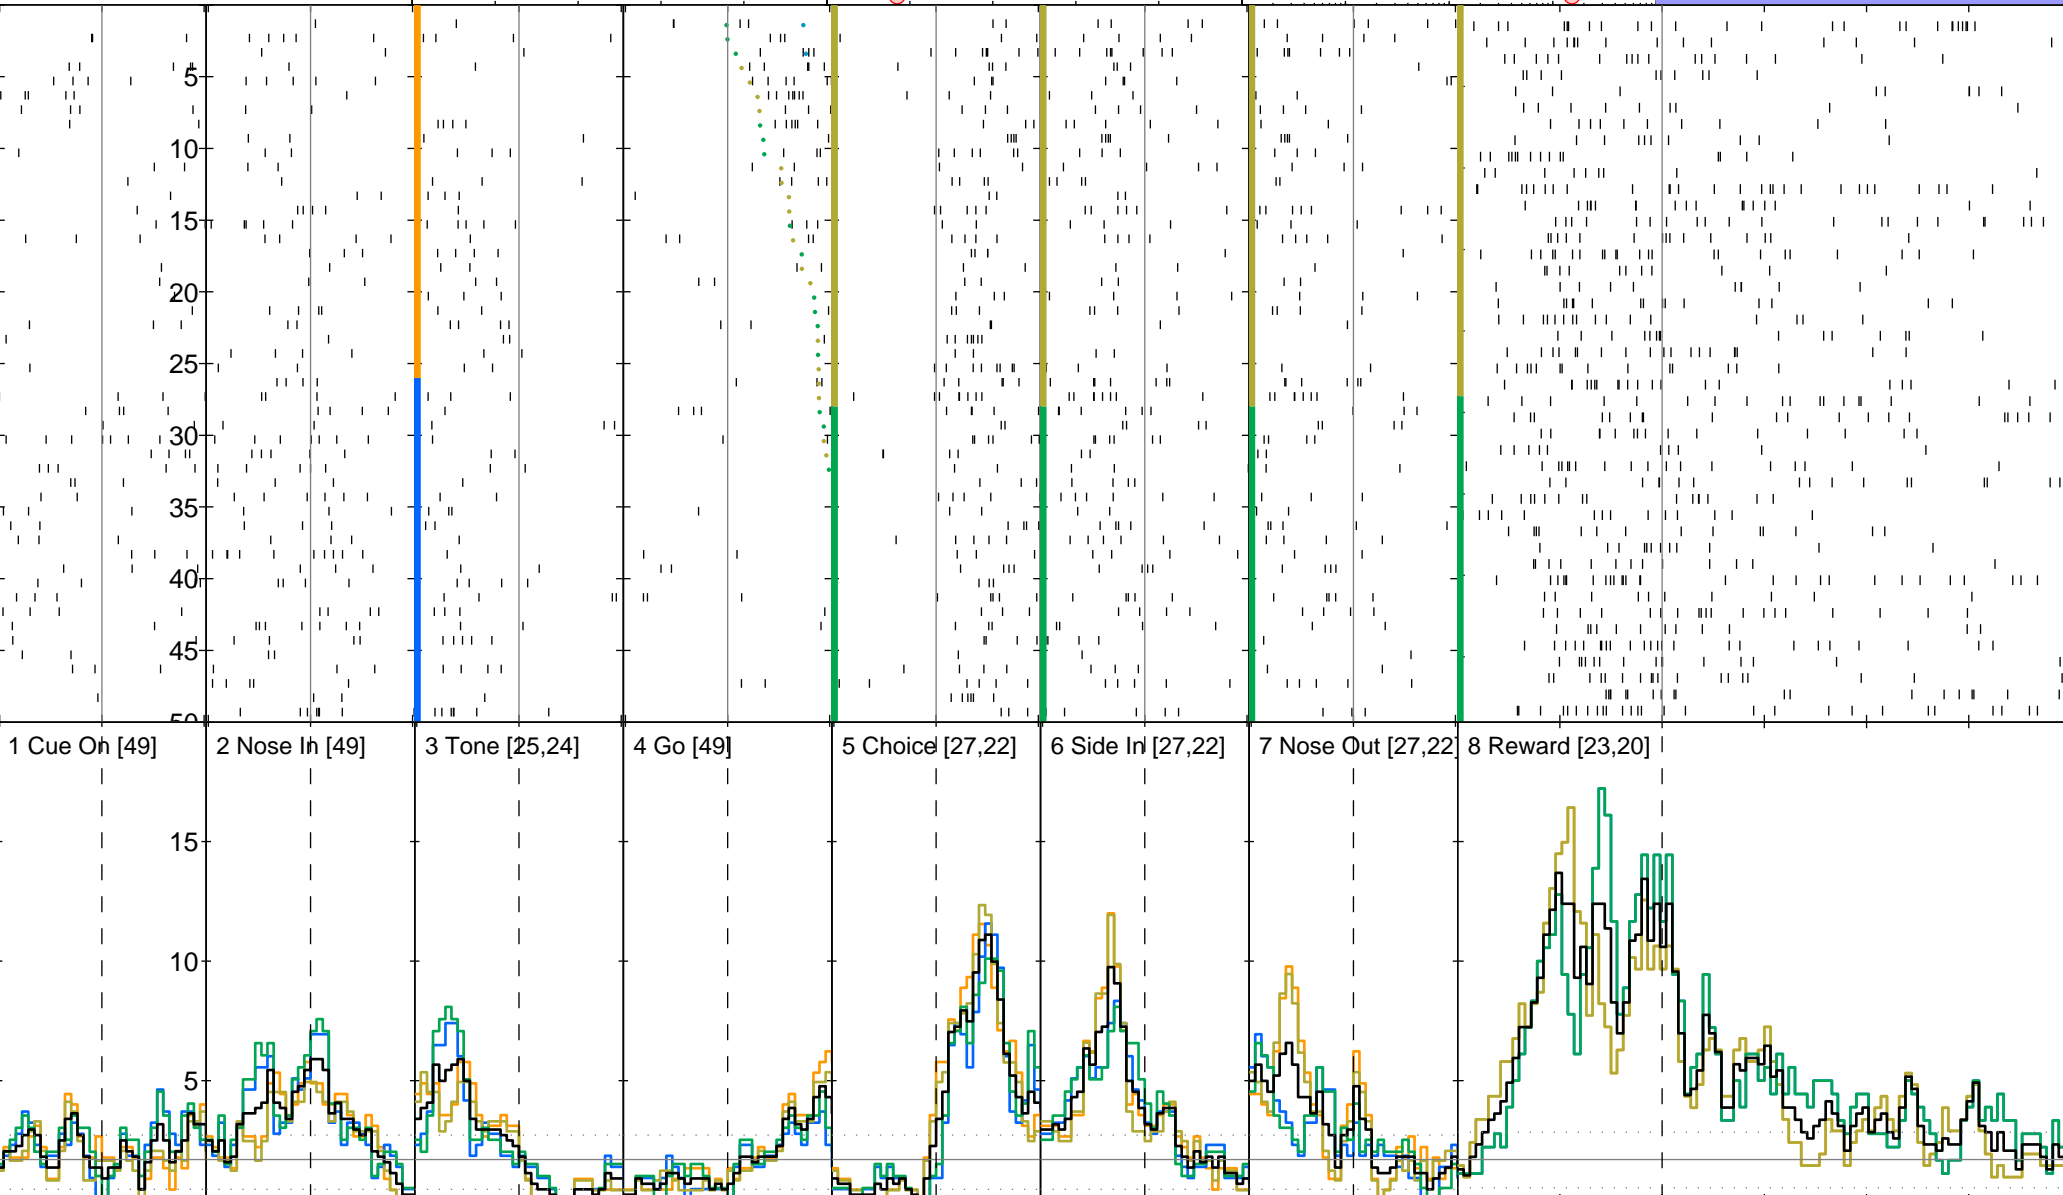

Cell: C1220071025R01a

AP: 3.2 ML: 2.6 DV: 2.4

w: 1 n: 1780  $P_{ISI>2}$ : 0.63

1/2pw: 179 $\mu$ s p->v: 350 $\mu$ s

$\beta_T$ : NaN  $\beta_D$ : NaN

$\beta_P$ : NaN SI: NaN

Session FR: 0.89 Hz

Pk Ev: 8 - Reward (T1/Con)

Pk FR: 5.23Hz (-0.1s) **M1<sub>I</sub>**

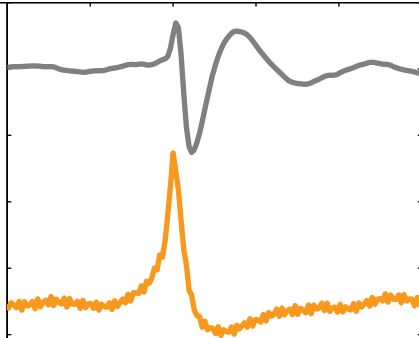

HP/PV

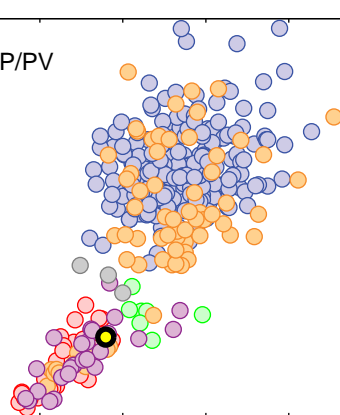

FR/PV

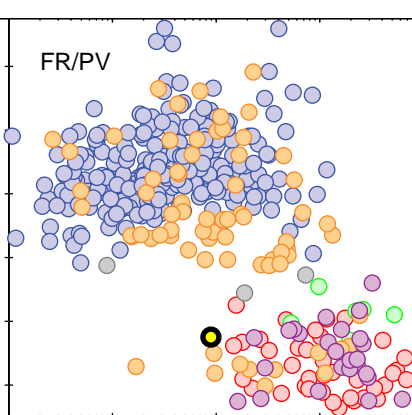

ISI Histogram [51]

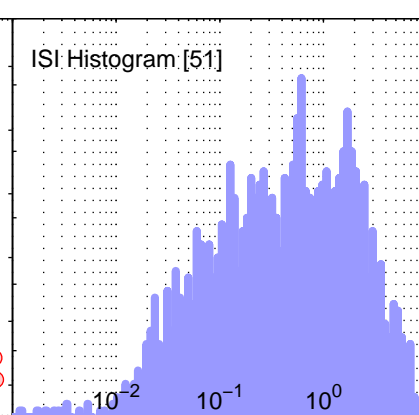

5  
10  
15  
20  
25  
30  
35  
40  
45  
50

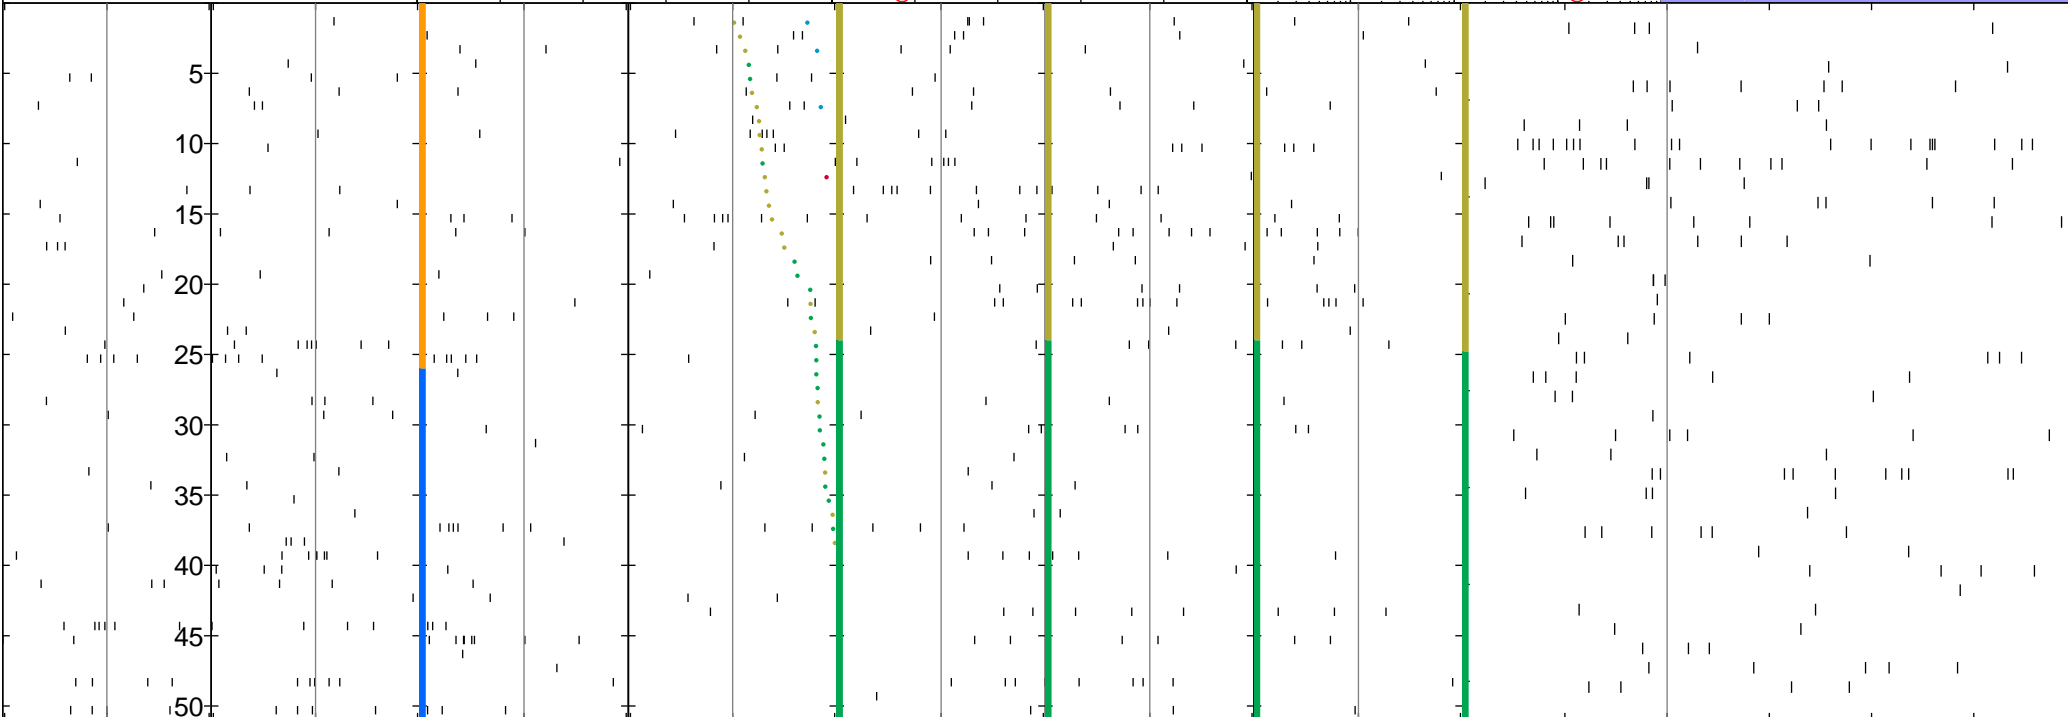

1 Cue On [50]

2 Nose In [50]

3 Tone [25,25]

4 Go [50]

5 Choice [23,27]

6 Side In [23,27]

7 Nose Out [23,27]

8 Reward [17,19]

5  
4  
3  
2  
1

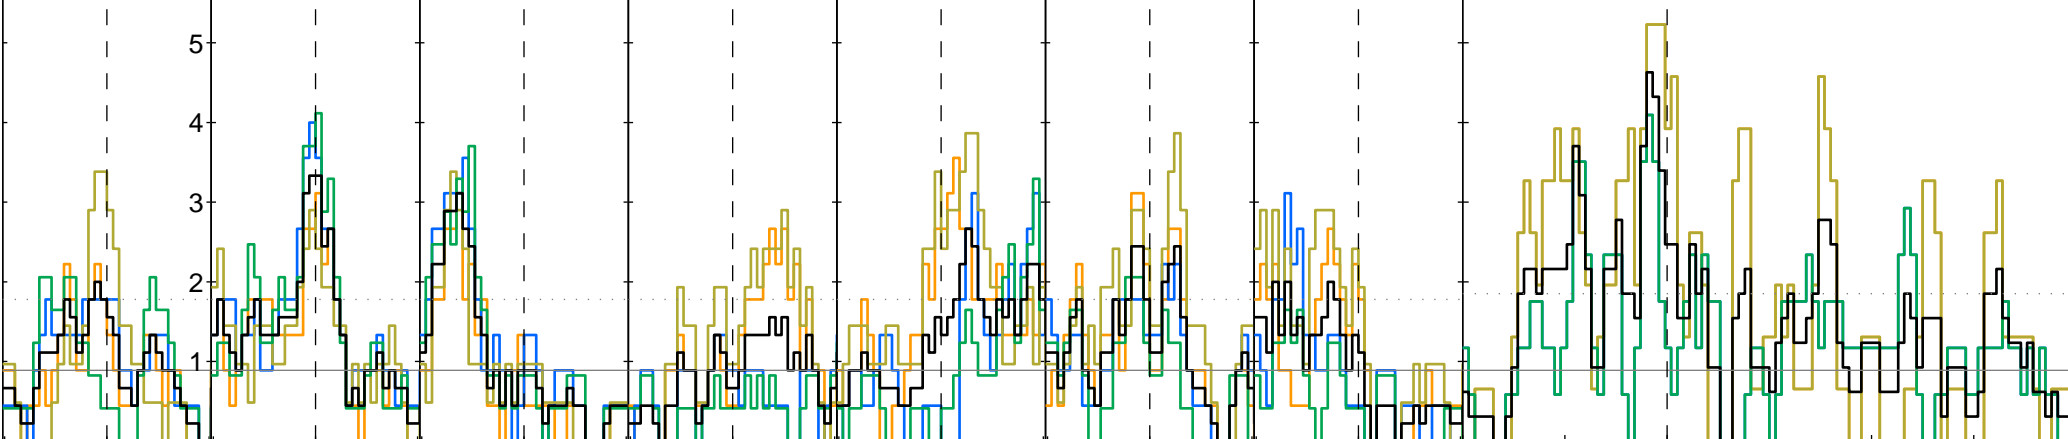

Cell: C1220071114T02b

AP: 3.7 ML: 3.5 DV: 2.1

w: 3 n: 69181  $P_{ISI>2}$ : 0.0013

1/2pw: 123 $\mu$ s p $\rightarrow$ v: 238 $\mu$ s

$\beta_T$ : 2.7  $\beta_D$ : 3.7

$\beta_P$ : 2.7 SI: 0.31

Session FR: 11.3 Hz

Pk Ev: 8 - Reward (T1/Con)

Pk FR: 26.2Hz (-0.07s) **M1<sub>I</sub>**

Waveform

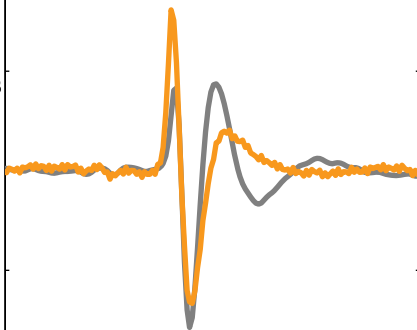

HP/PV

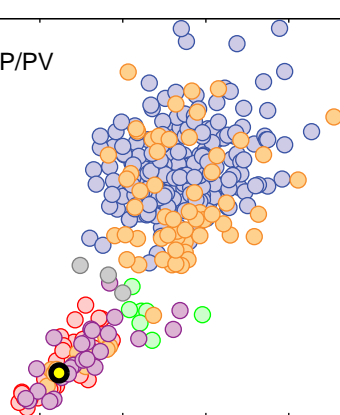

FR/PV

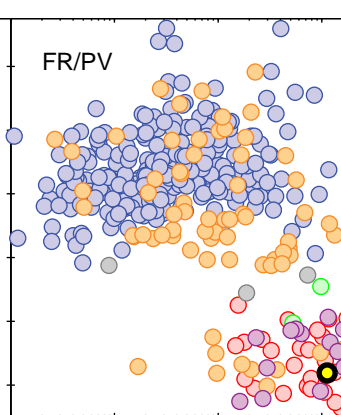

ISI Histogram [2303]

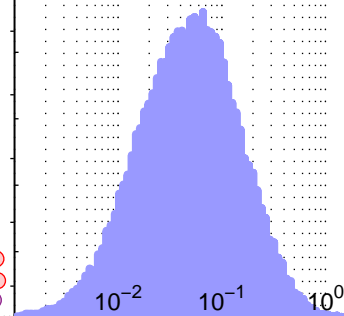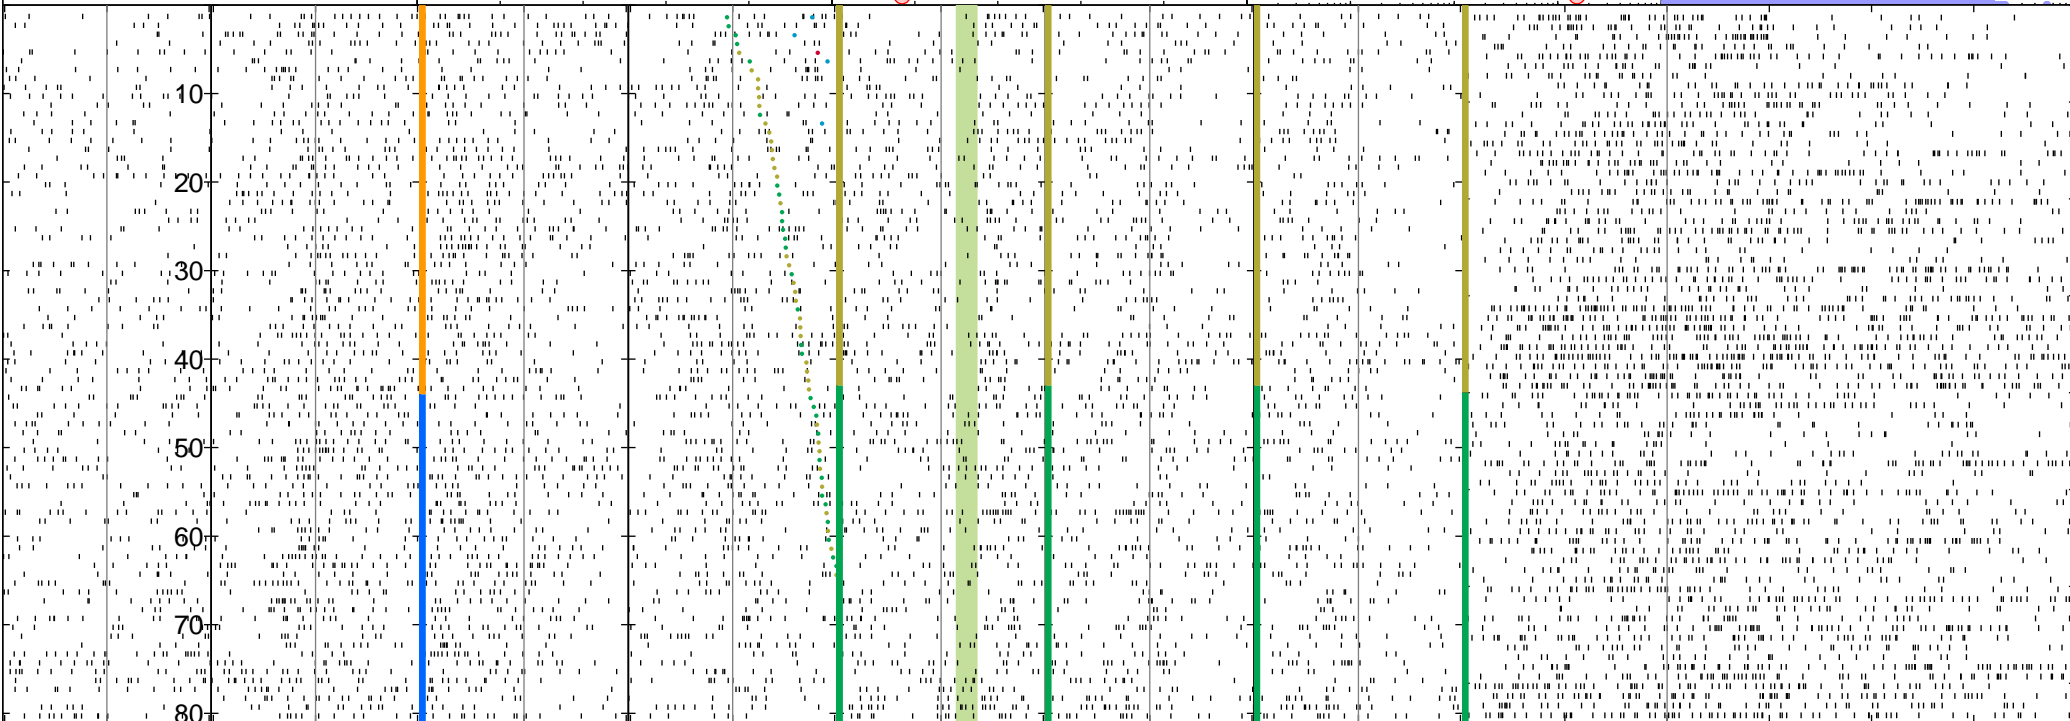

1 Cue On [80]

2 Nose In [80]

3 Tone [43,37]

4 Go [80]

5 Choice [42,38]

6 Side In [42,38]

7 Nose Out [42,38]

8 Reward [39,34]

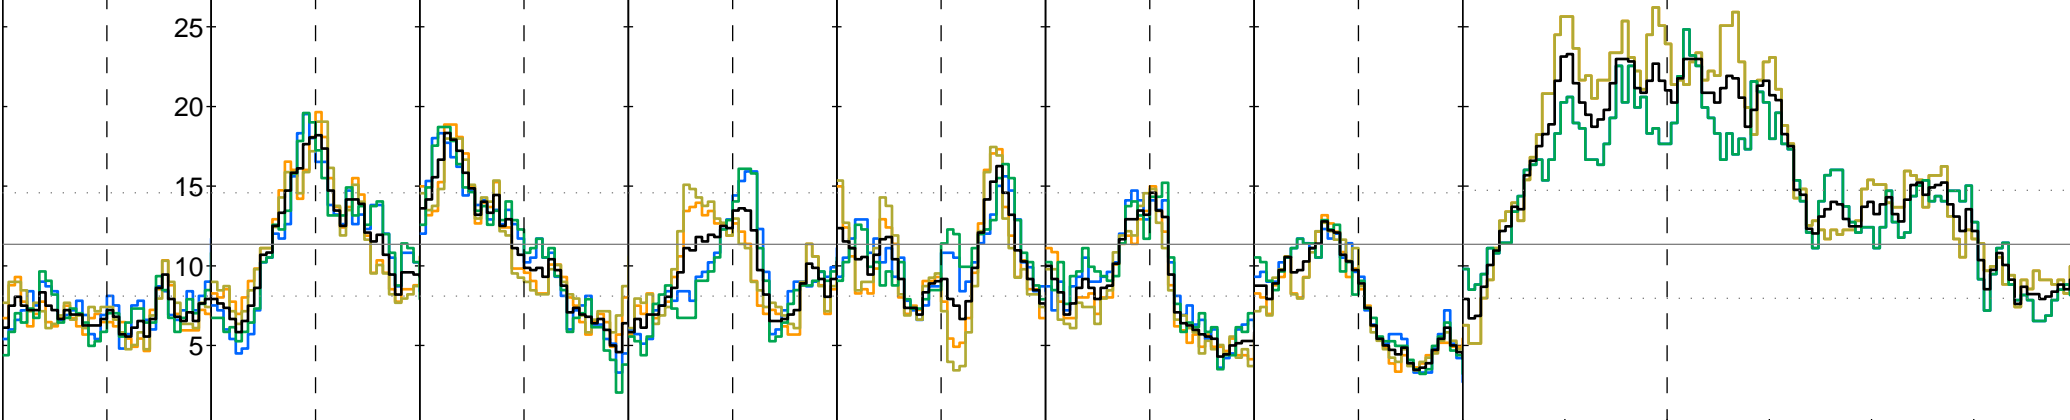

Cell: C1220071114T03a

AP: 3.2 ML: 2.6 DV: 2.4

w: 4 n: 116832  $P_{ISI>2}$ : 0.002

1/2pw: 184 $\mu$ s p->v: 322 $\mu$ s

$\beta_T$ : -2.5  $\beta_D$ : 2.7

$\beta_P$ : -3 SI: 0.62

Session FR: 19.2 Hz

Pk Ev: 8 - Reward (T1/Con)

Pk FR: 78.1Hz (0.08s) M1<sub>I</sub>

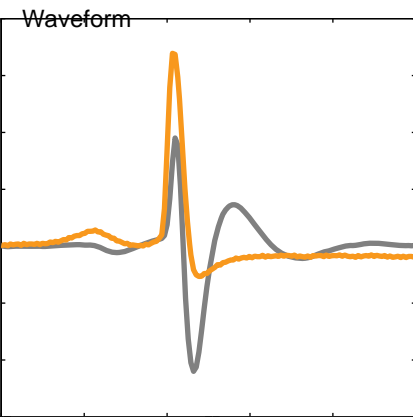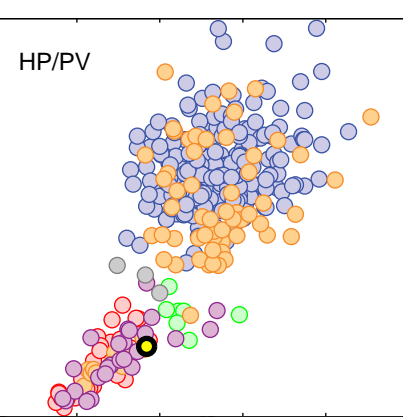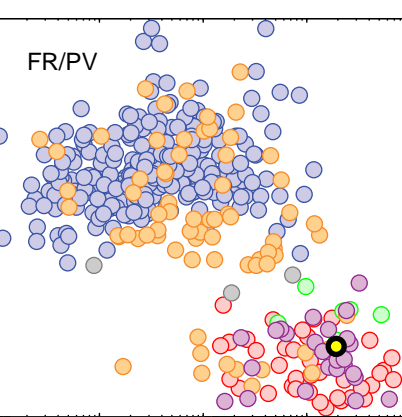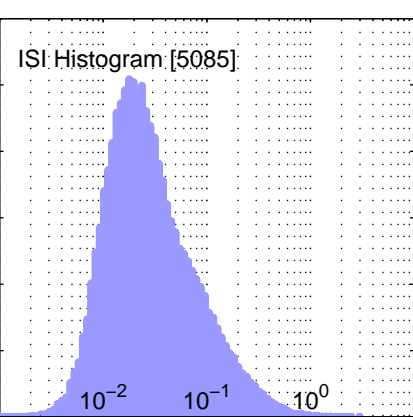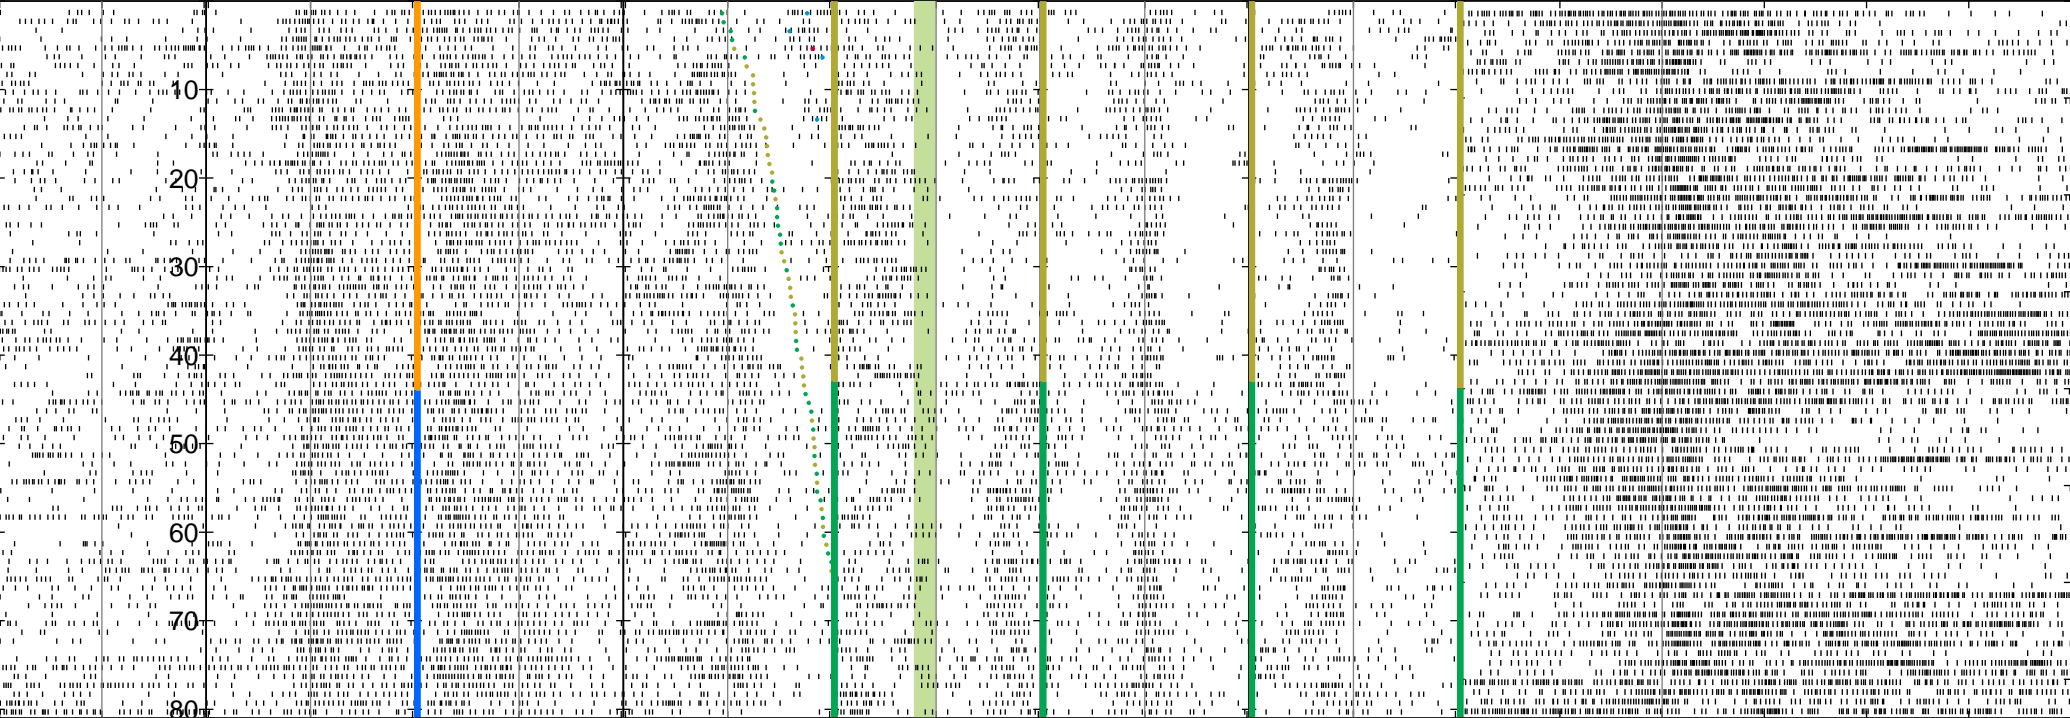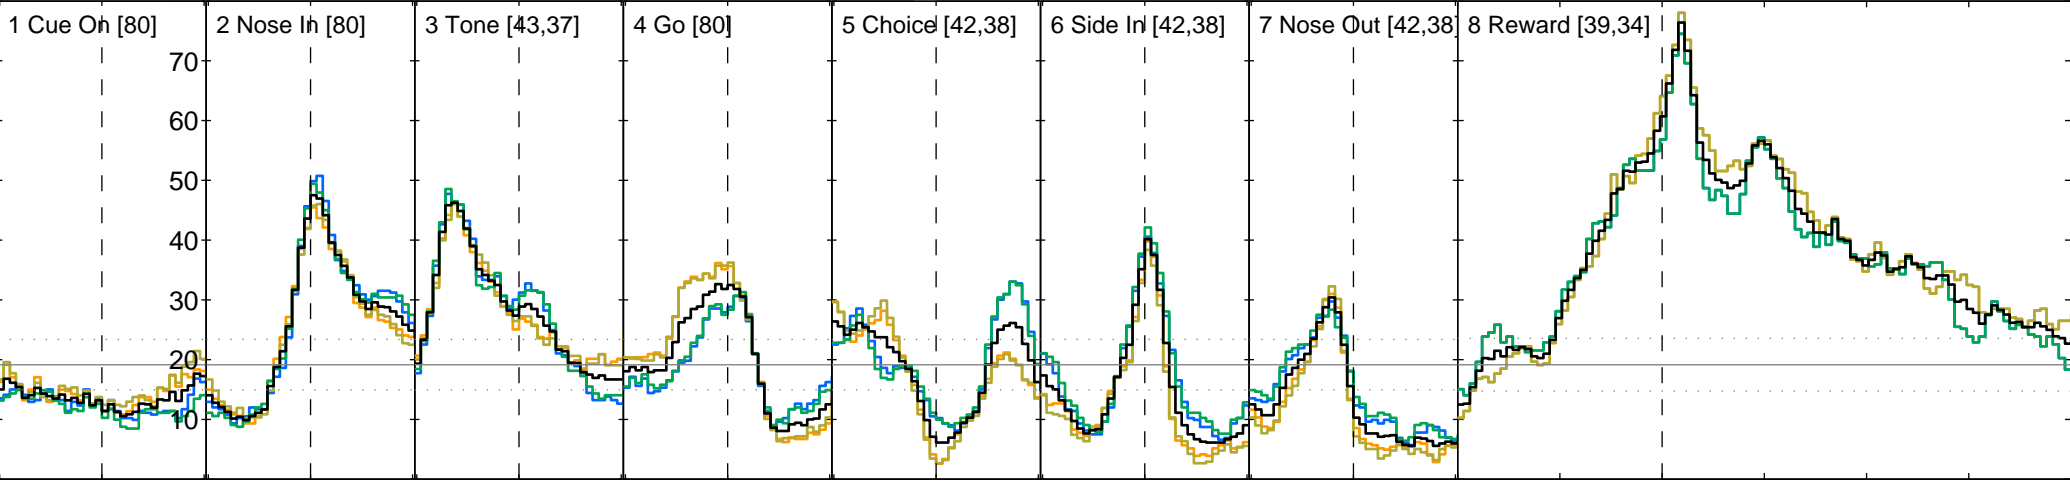



Cell: C1220071028T03d

AP: 3.2 ML: 2.6 DV: 2.3

w: 4 n: 97014  $P_{ISI>2}$ : 0.0048

1/2pw: 181 $\mu$ s p $\rightarrow$ v: 312 $\mu$ s

$\beta_T$ : -2.9  $\beta_D$ : 4.5

$\beta_P$ : 2.8 SI: -0.42

Session FR: 16.2 Hz

Pk Ev: 8 - Reward (T1/Con)

Pk FR: 60.1Hz (0.11s) **M1<sub>I</sub>**

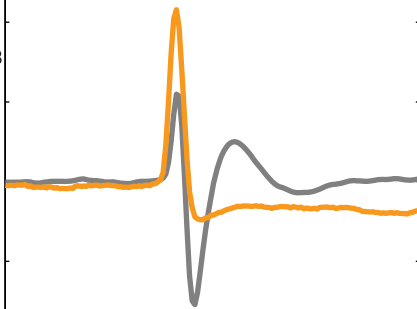

HP/PV

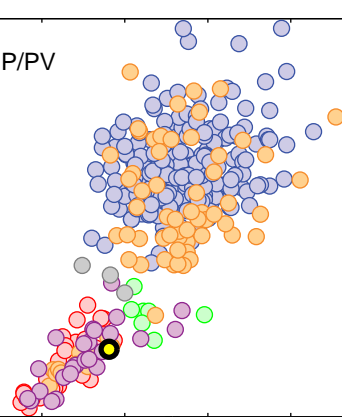

FR/PV

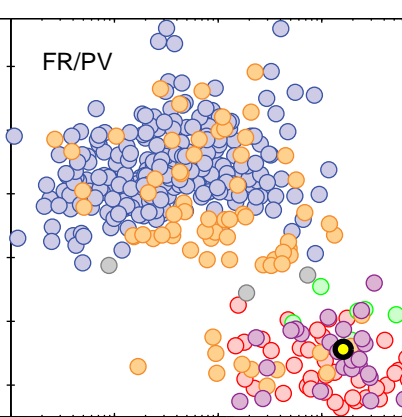

ISI Histogram [3434]

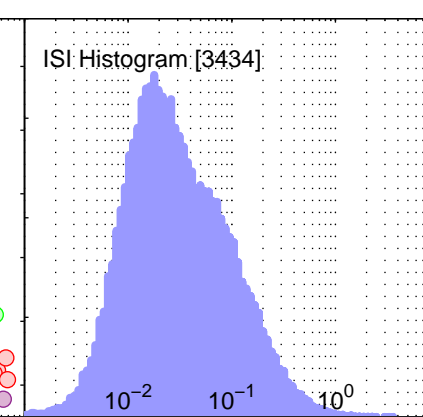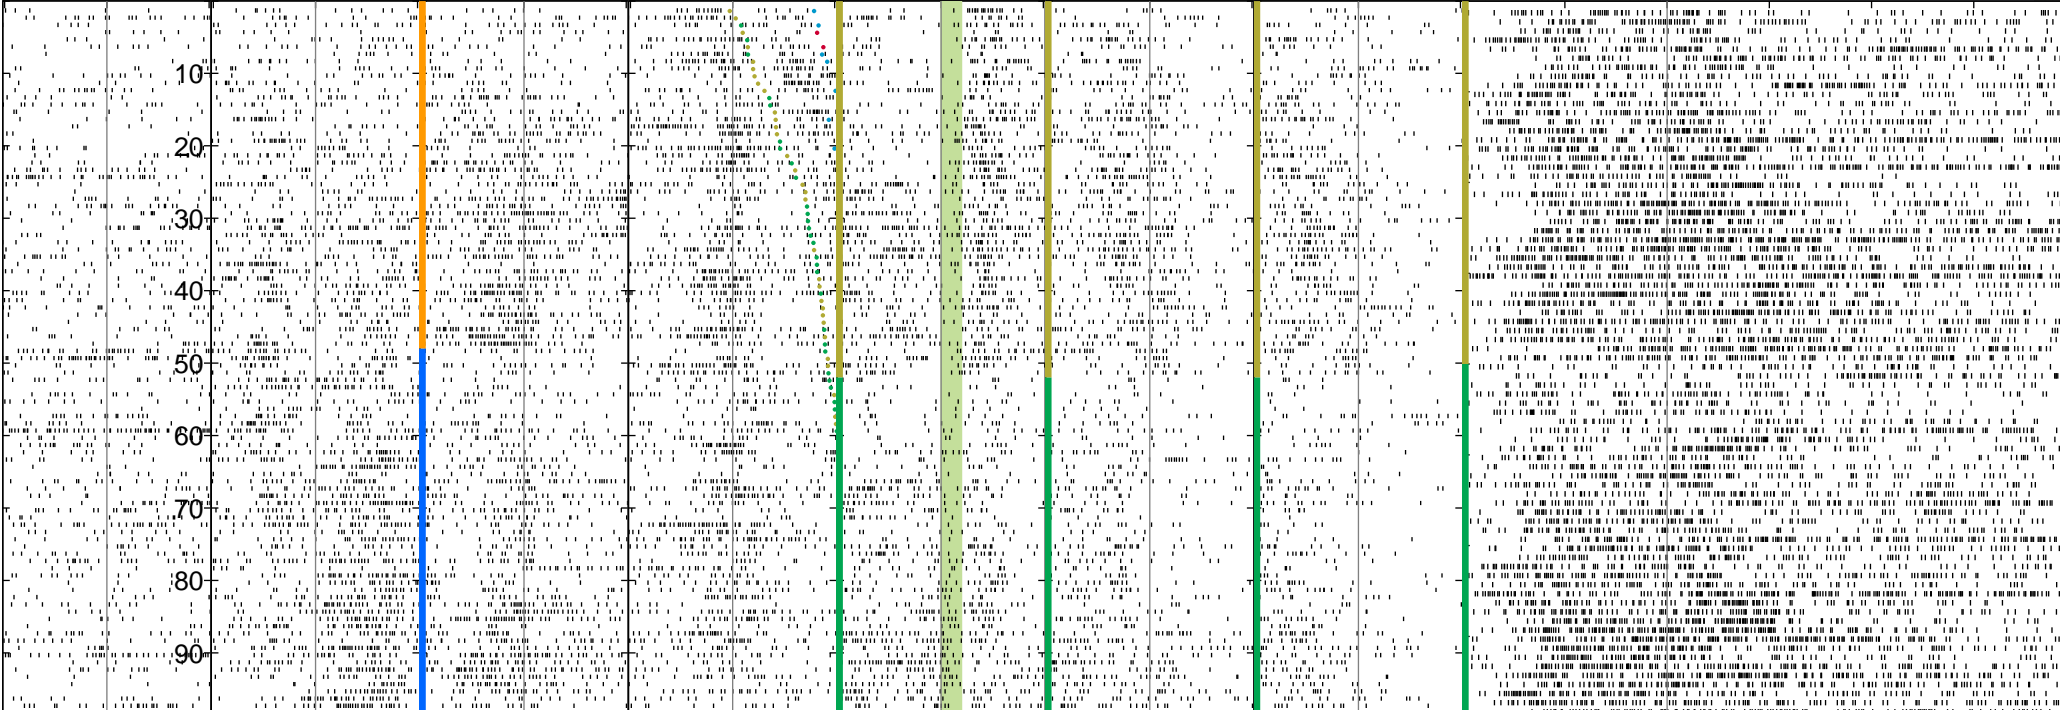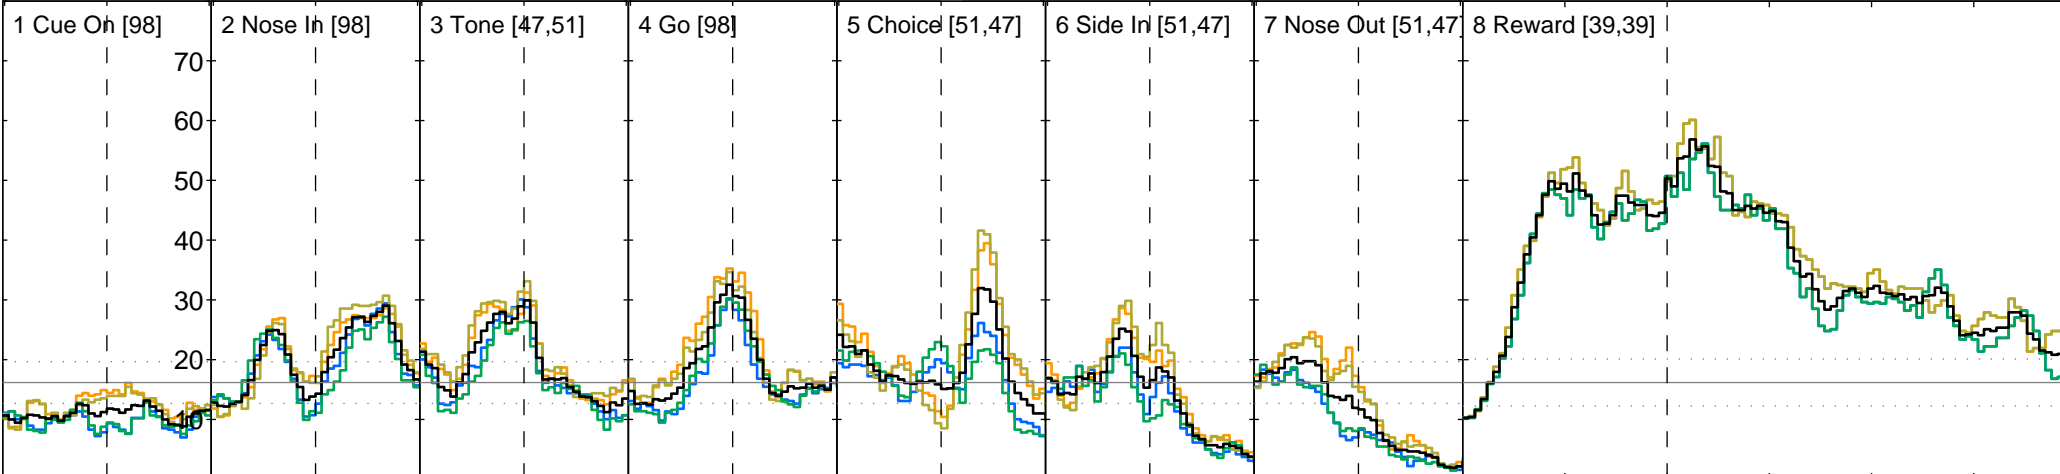

**Cell: C1220071117T02b**

AP: 3.7 ML: 3.5 DV: 2.5  
w: 3 n: 1735  $P_{ISI>2}$ : 0.95  
1/2pw: 155 $\mu$ s p->v: 258 $\mu$ s  
 $\beta_T$ : NaN  $\beta_D$ : NaN  
 $\beta_P$ : NaN SI: NaN  
Session FR: 0.169 Hz  
Pk Ev: None  
Pk FR: --

M1<sub>I</sub>

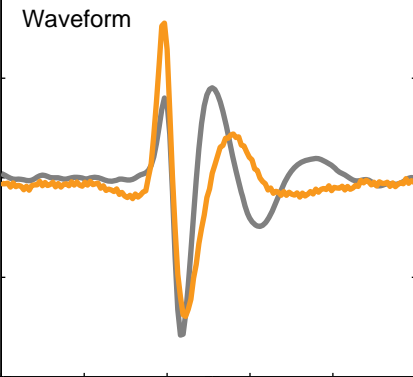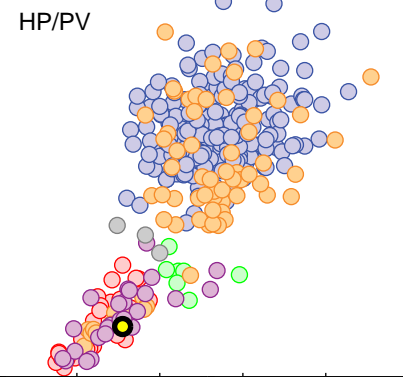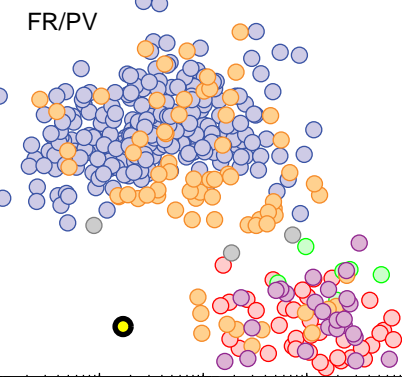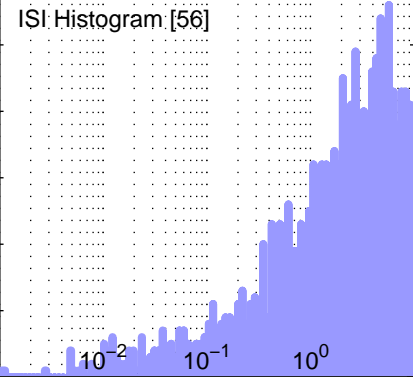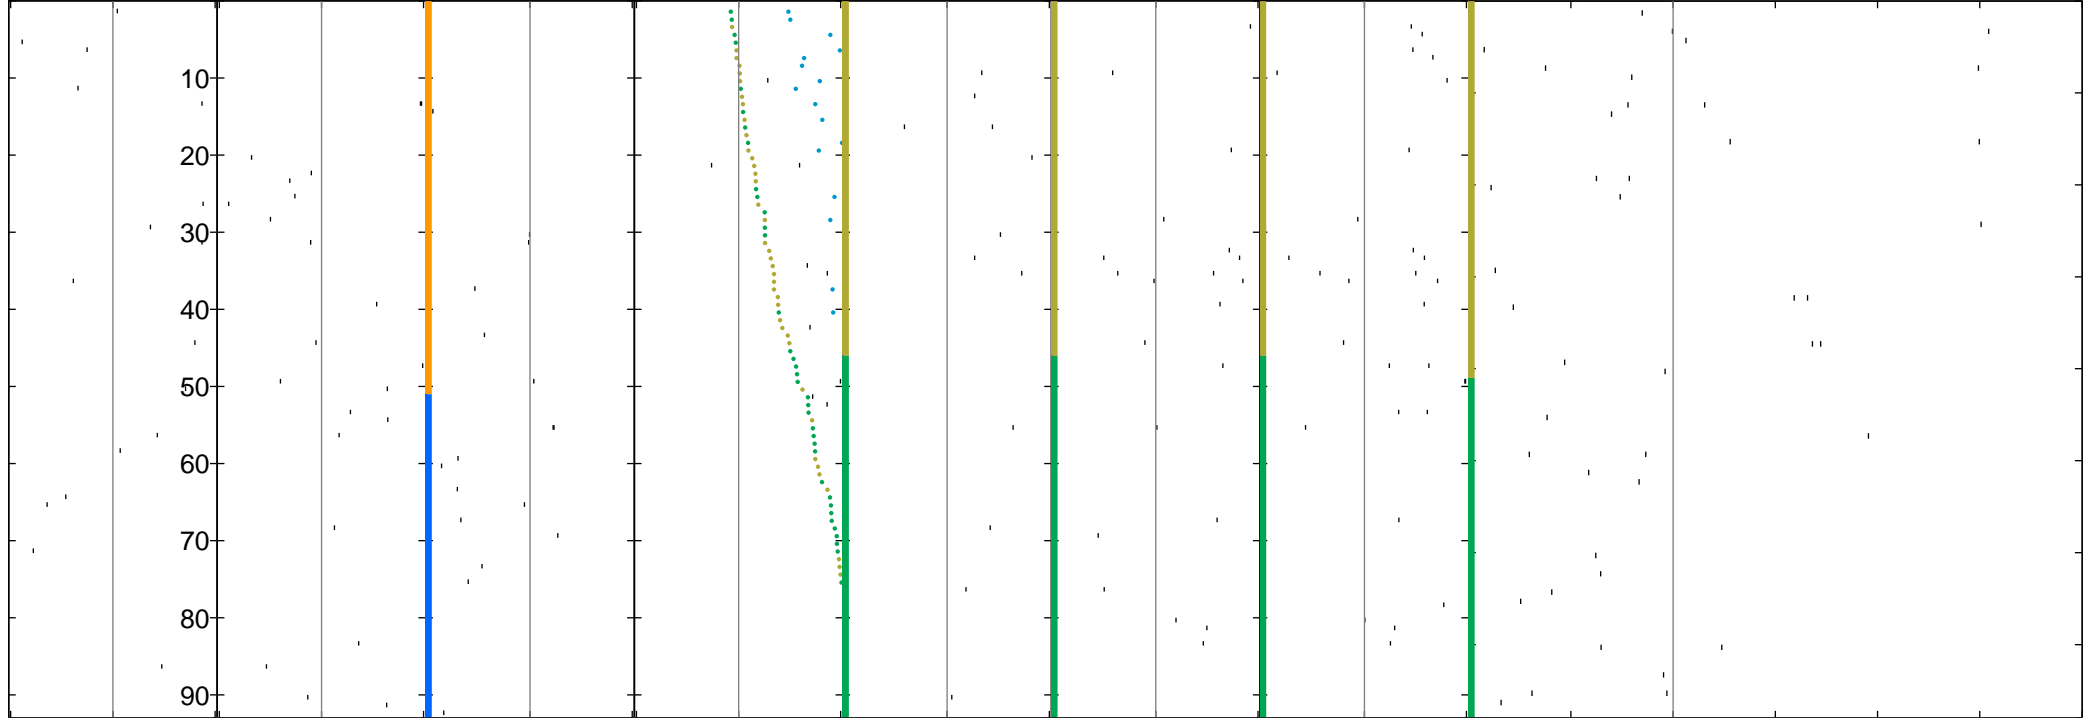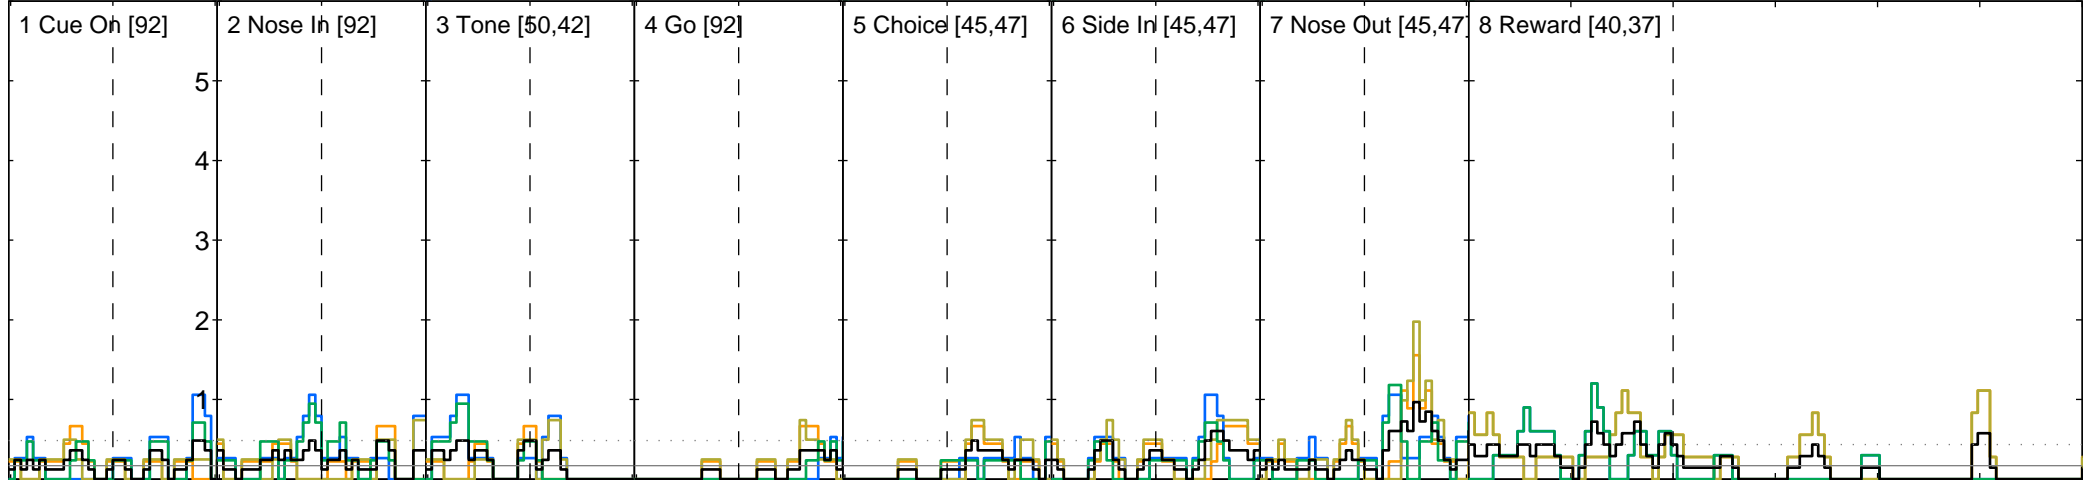

Cell: C0320070623T15b

AP: -2.3 ML: 4.6 DV: 7.1

w: 1 n: 121632  $P_{ISI>2}$ : 0

1/2pw: 184 $\mu$ s p $\rightarrow$ v: 520 $\mu$ s

$\beta_T$ : 3.2  $\beta_D$ : -2.6

$\beta_P$ : -3 SI: 0.25

Session FR: 32 Hz

Pk Ev: 1 - Cue on (Tone1)

Pk FR: 41.2Hz (-0.44s) GP

Waveform

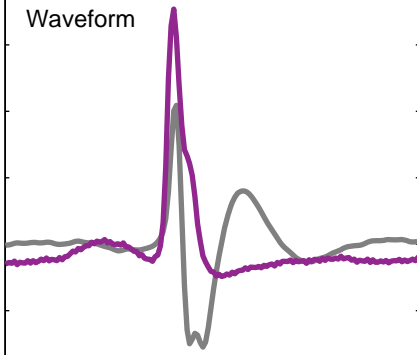

HP/PV

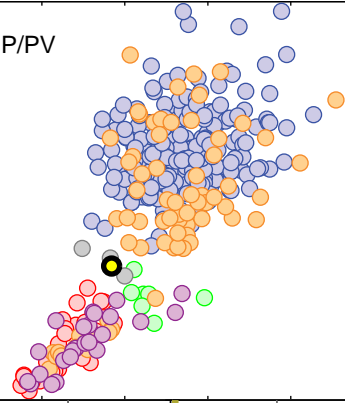

FR/PV

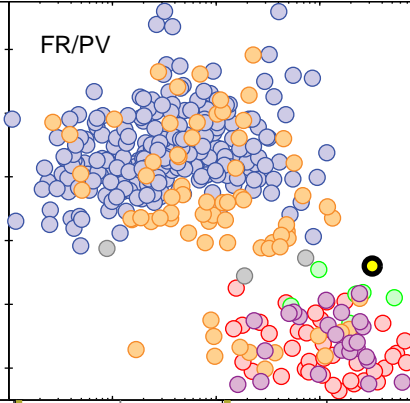

ISI Histogram [7063]

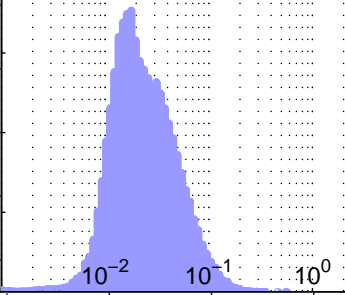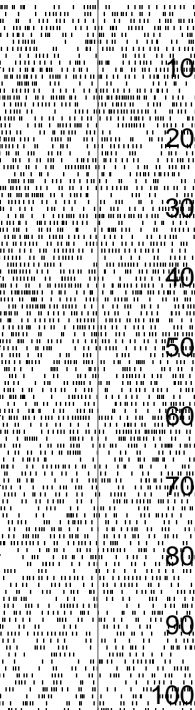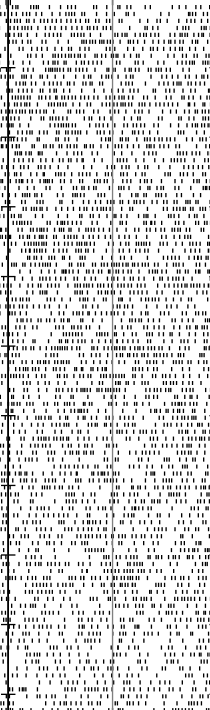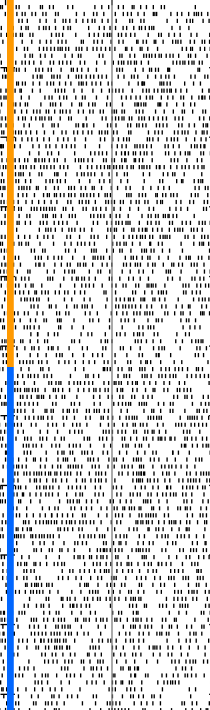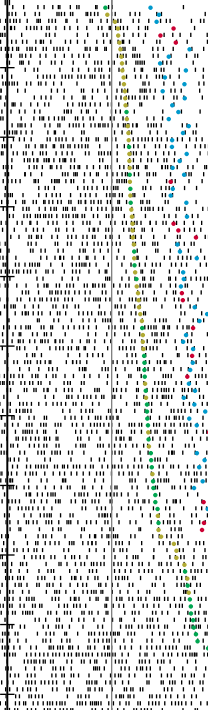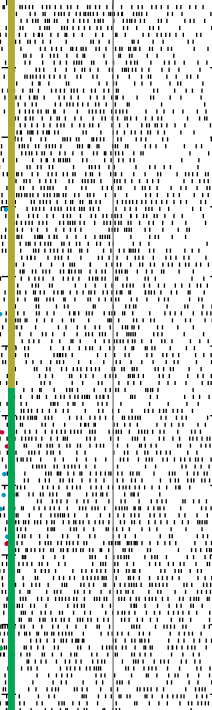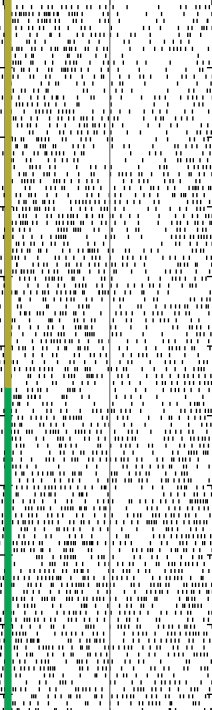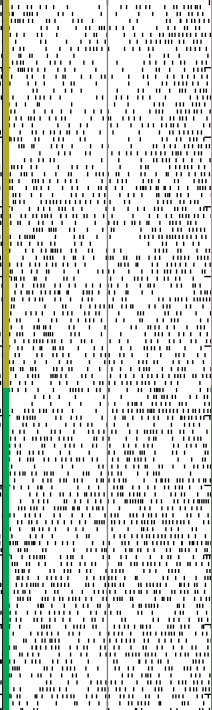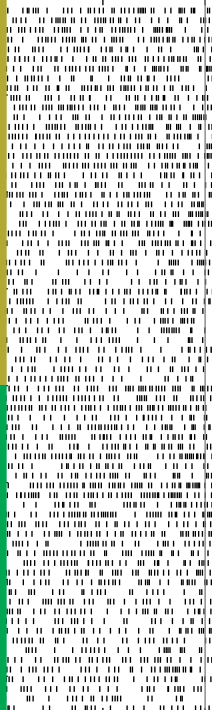

1 Cue On [102]

2 Nose In [102]

3 Tone [52,50]

4 Go [102]

5 Choice [55,47]

6 Side In [55,47]

7 Nose Out [55,47]

8 Reward [39,34]

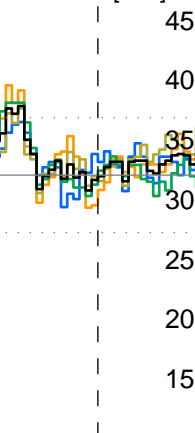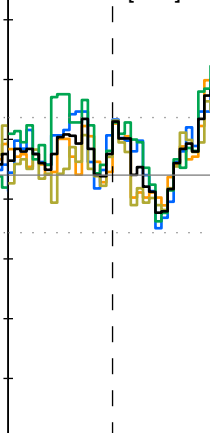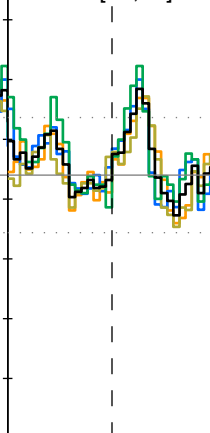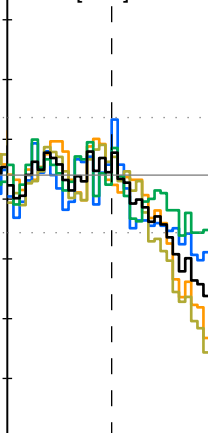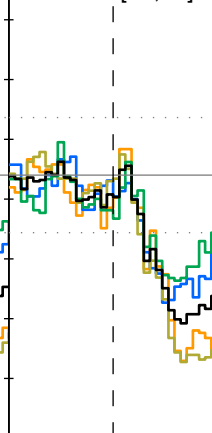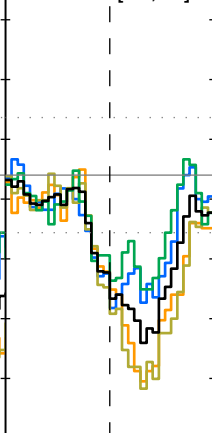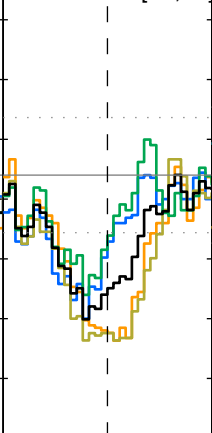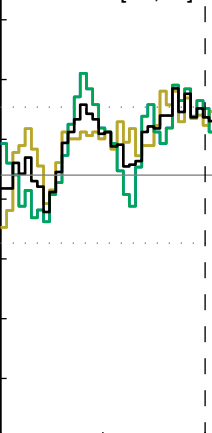

Cell: C0320070621T15a

AP: -2.3 ML: 4.6 DV: 6.8

w: 3 n: 74147  $P_{ISI>2}$ : 0

1/2pw: 269 $\mu$ s p->v: 434 $\mu$ s

$\beta_T$ : 3  $\beta_D$ : 5.1

$\beta_P$ : -2.7 SI: 0.24

Session FR: 24.2 Hz

Pk Ev: 3 - Tone (Tone2)

Pk FR: 37.9Hz (0.21s) GP

Waveform

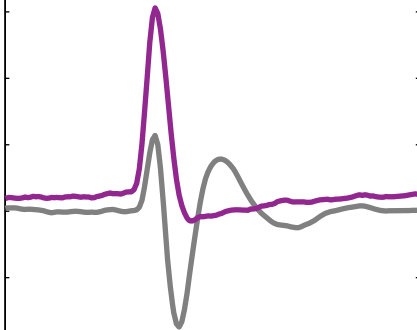

HP/PV

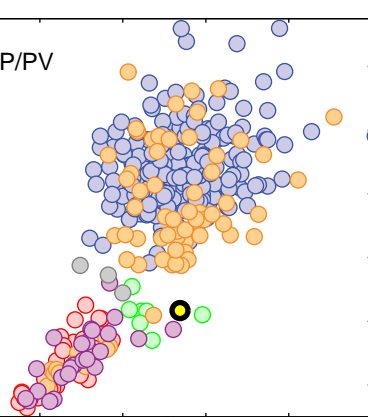

FR/PV

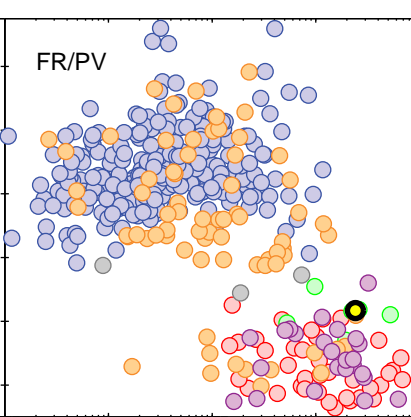

ISI Histogram [4211]

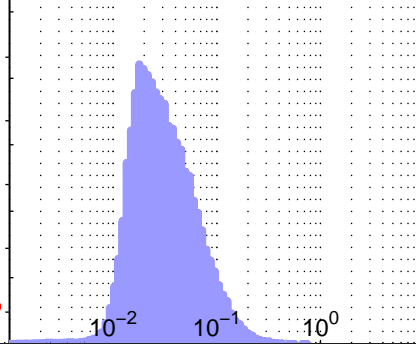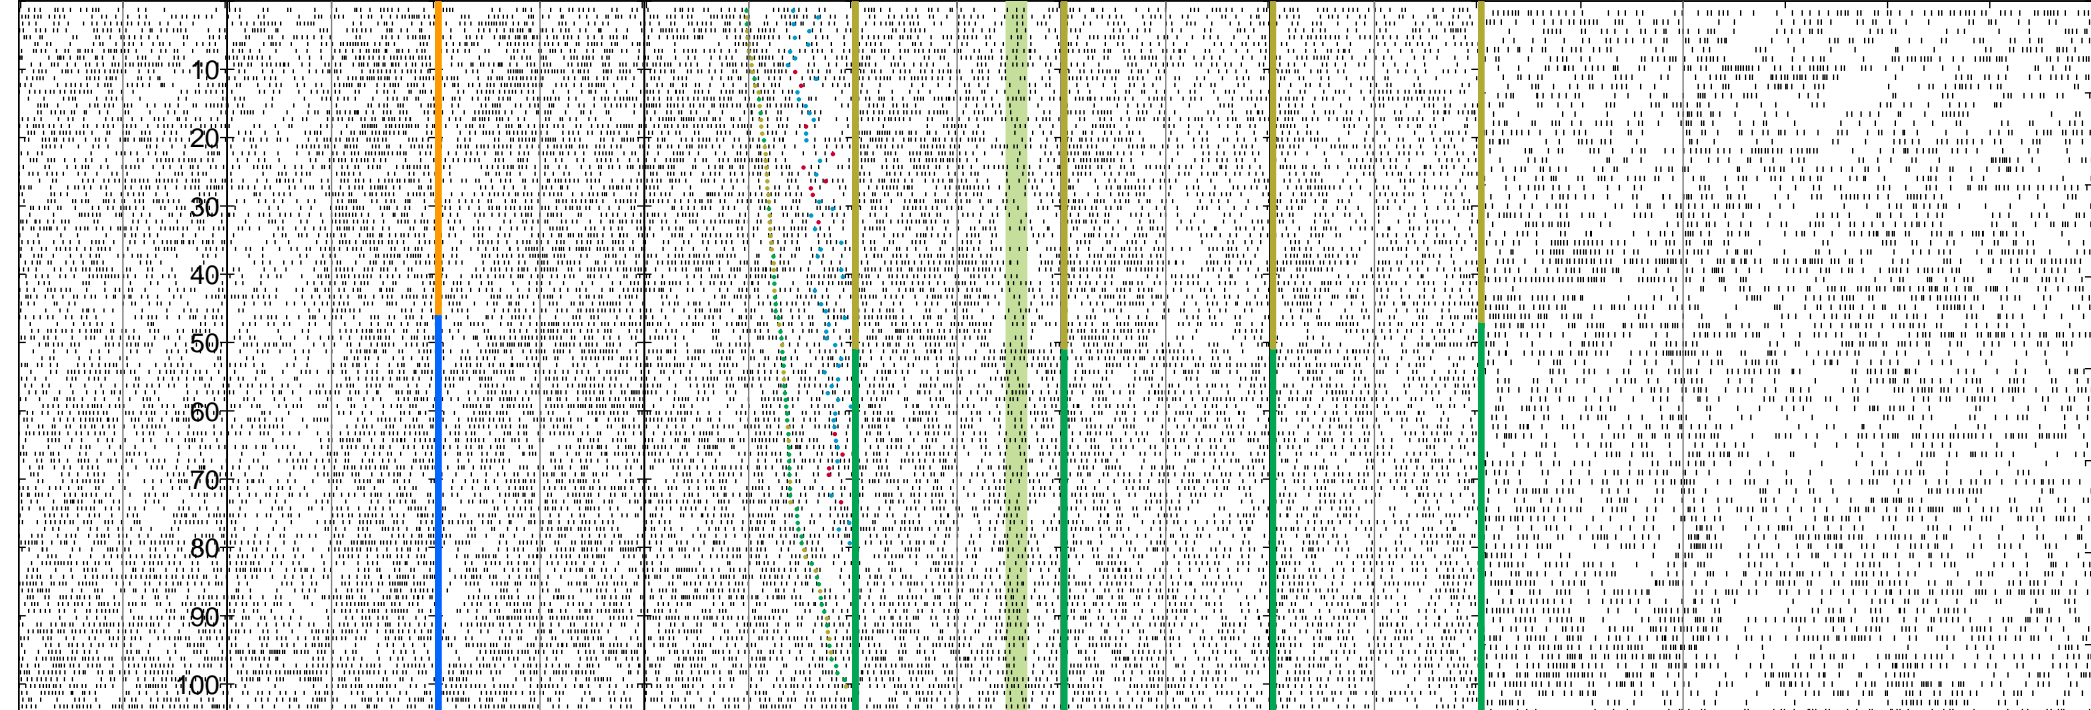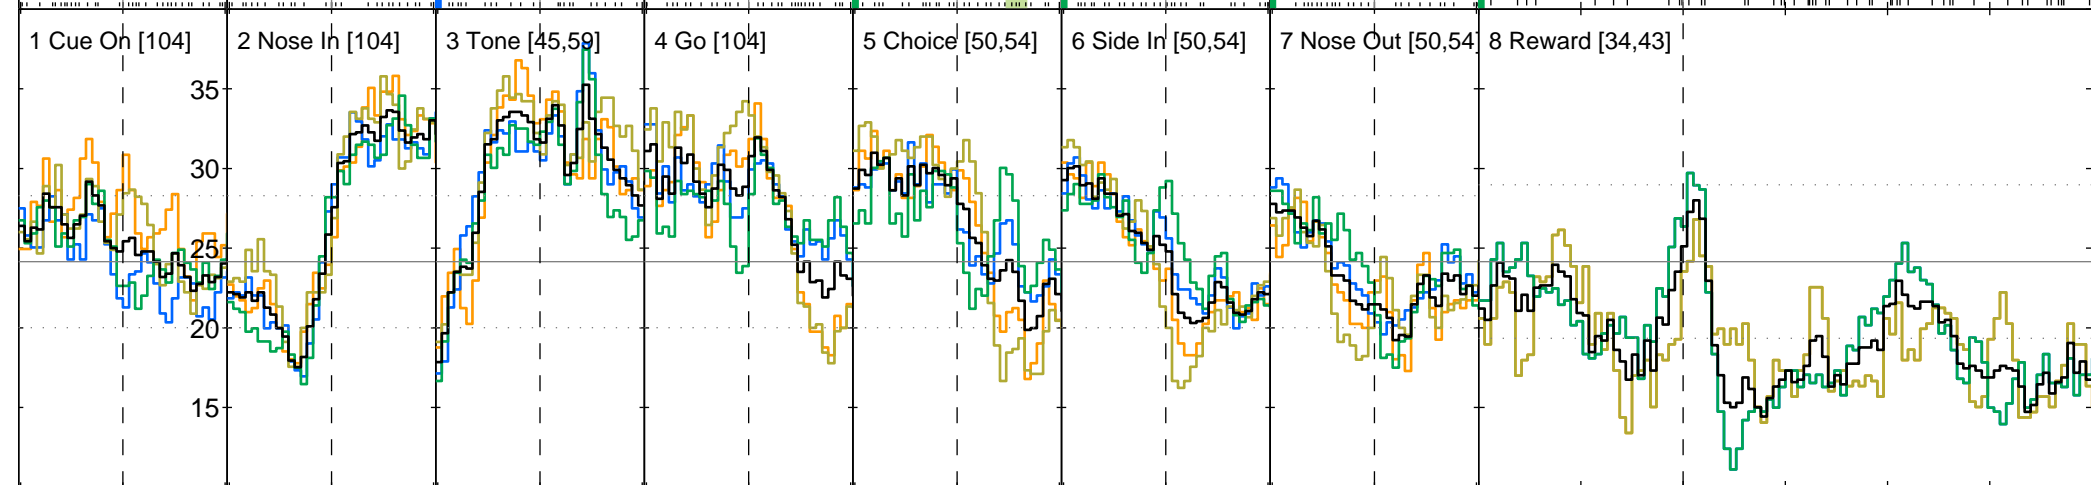

**Cell: C0520070406R03a**

AP: -2.5 ML: 4.1 DV: 5.6

w: 1 n: 52548  $P_{ISI>2}$ : 0.0421/2pw: 157 $\mu$ s p->v: 334 $\mu$ s $\beta_T$ : 2.4  $\beta_D$ : -5.6 $\beta_P$ : 4.7 SI: -0.79

Session FR: 12.1 Hz

Pk Ev: 3 - Tone (Contra)

Pk FR: 25.3Hz (0.45s) **GP**

Waveform

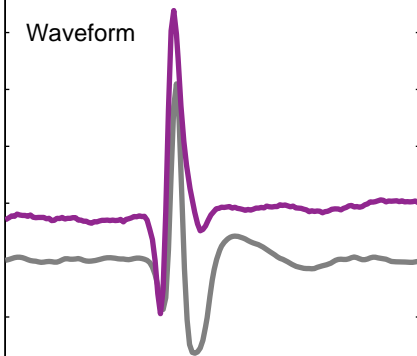

HP/PV

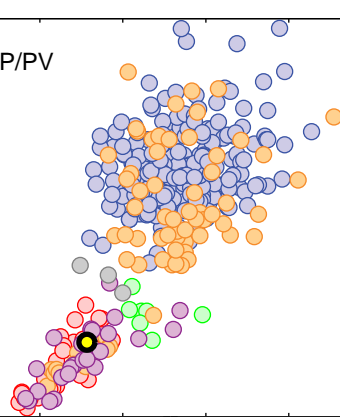

FR/PV

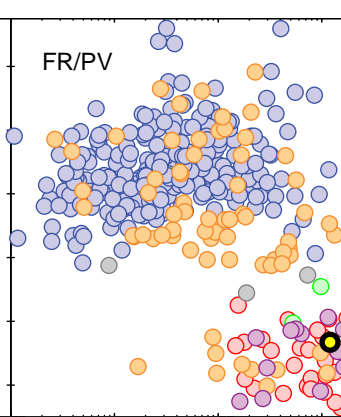

ISI Histogram [2005]

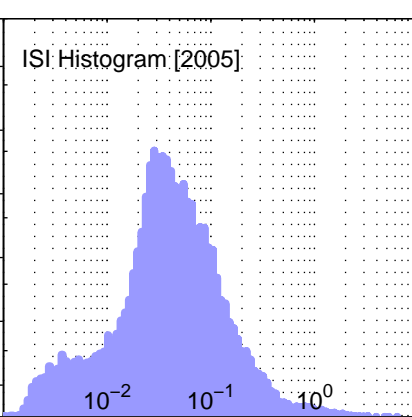

50

100

150

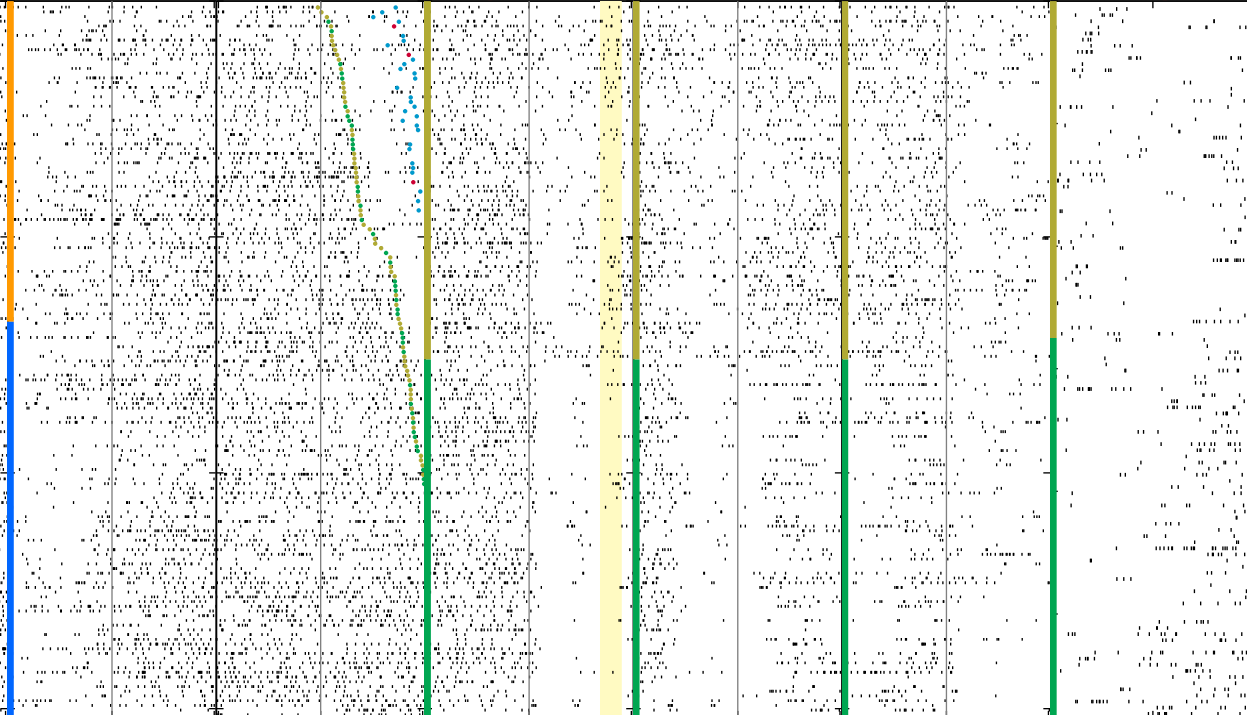

1 Cue On [151]

2 Nose In [151]

3 Tone [67,84]

4 Go [151]

5 Choice [75,76]

6 Side In [75,76]

7 Nose Out [75,76]

8 Reward [54,62]

25

20

15

5

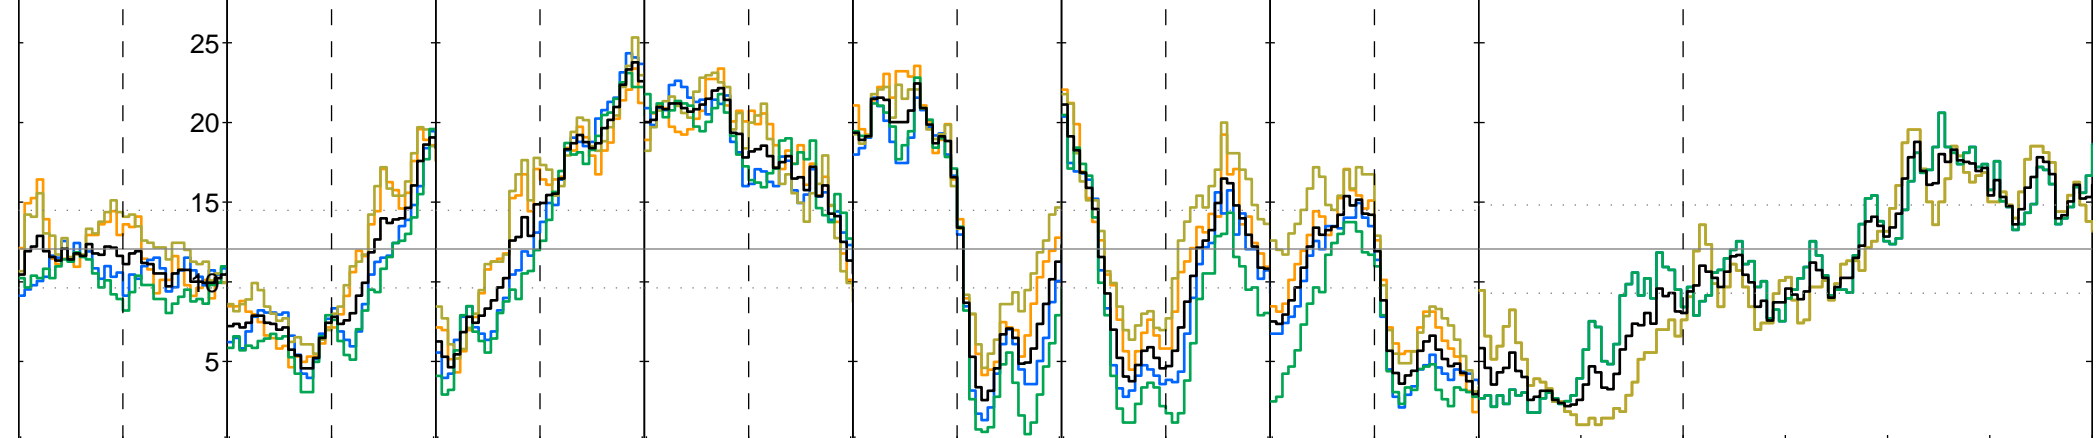



Cell: C0320070619T15a

AP: -2.3 ML: 4.6 DV: 6.6

w: 3 n: 124050  $P_{ISI>2}$ : 0

1/2pw: 126 $\mu$ s p->v: 224 $\mu$ s

$\beta_T$ : 4.4  $\beta_D$ : 4.9

$\beta_P$ : -2.9 SI: 0.32

Session FR: 29.3 Hz

Pk Ev: 5 - Choice (Tone2)

Pk FR: 50.8Hz (-0.51s) GP

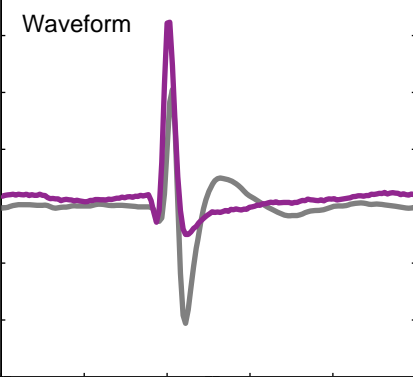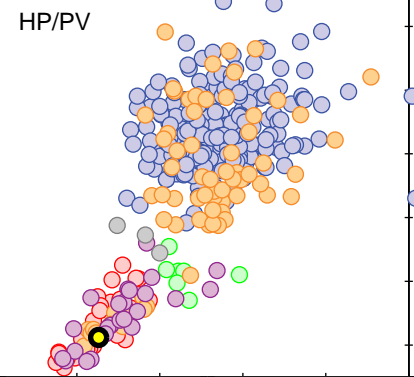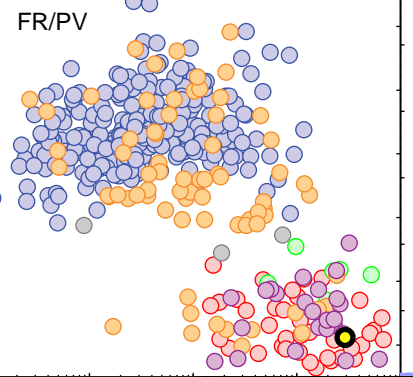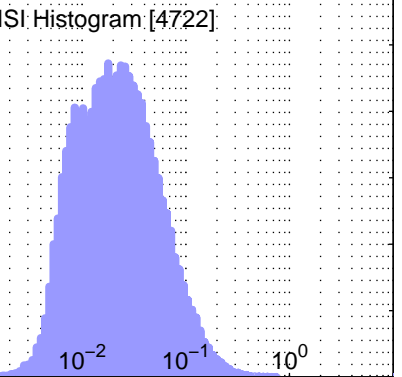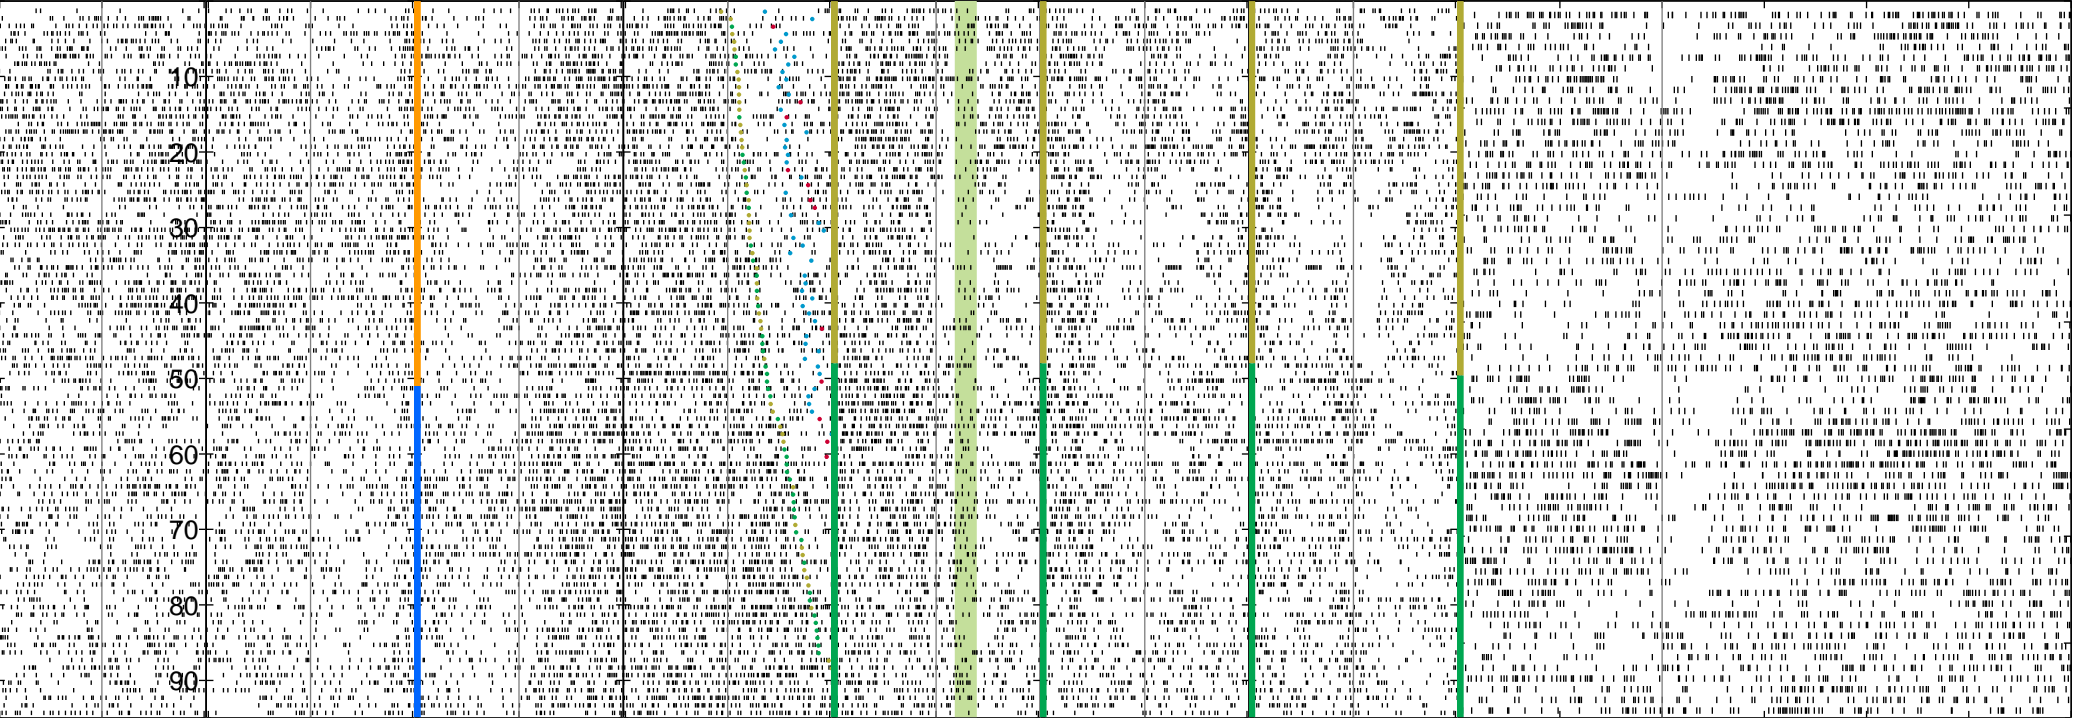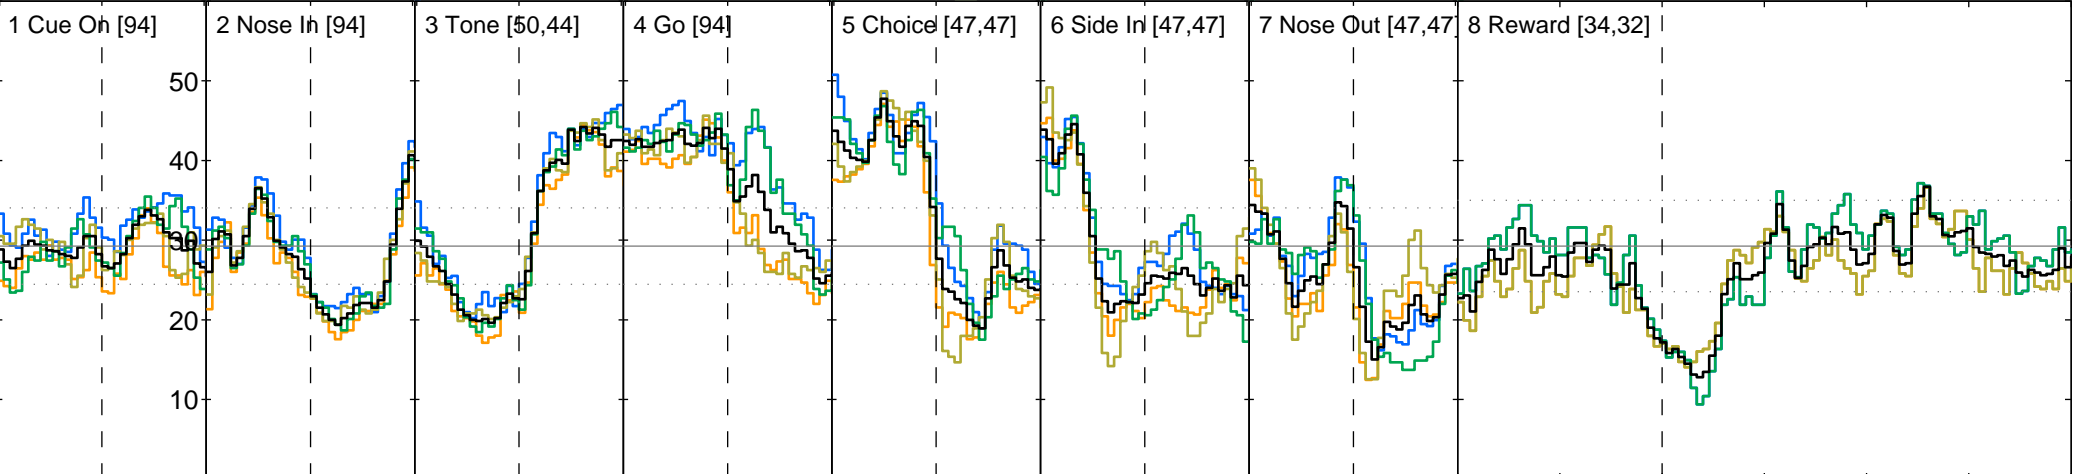

Cell: C0520070417R03a

AP: -2.5 ML: 4.1 DV: 6.2

w: 2 n: 96498  $P_{ISI>2}$ : 0.0074

1/2pw: 86 $\mu$ s p->v: 150 $\mu$ s

$\beta_T$ : 2.3  $\beta_D$ : -3.3

$\beta_P$ : 4.2 SI: -0.22

Session FR: 29.6 Hz

Pk Ev: 5 - Choice (Ipsi)

Pk FR: 64.8Hz (0.03s) GP

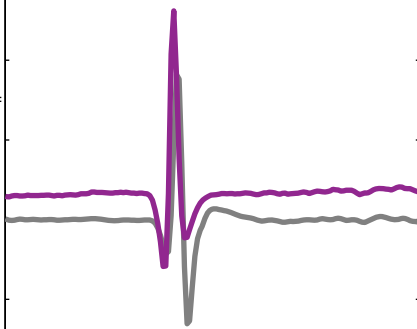

HP/PV

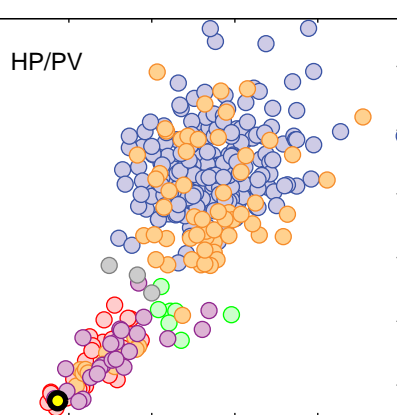

FR/PV

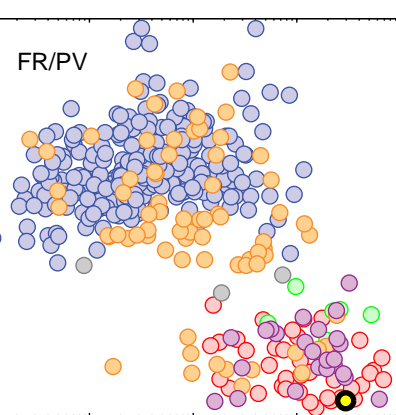

ISI Histogram [3473]

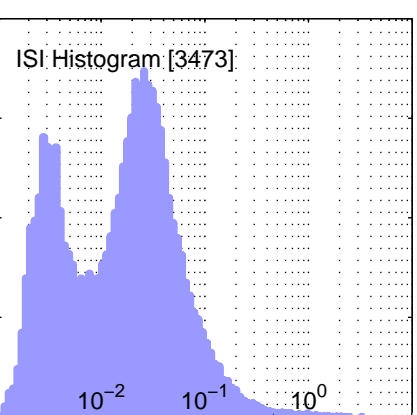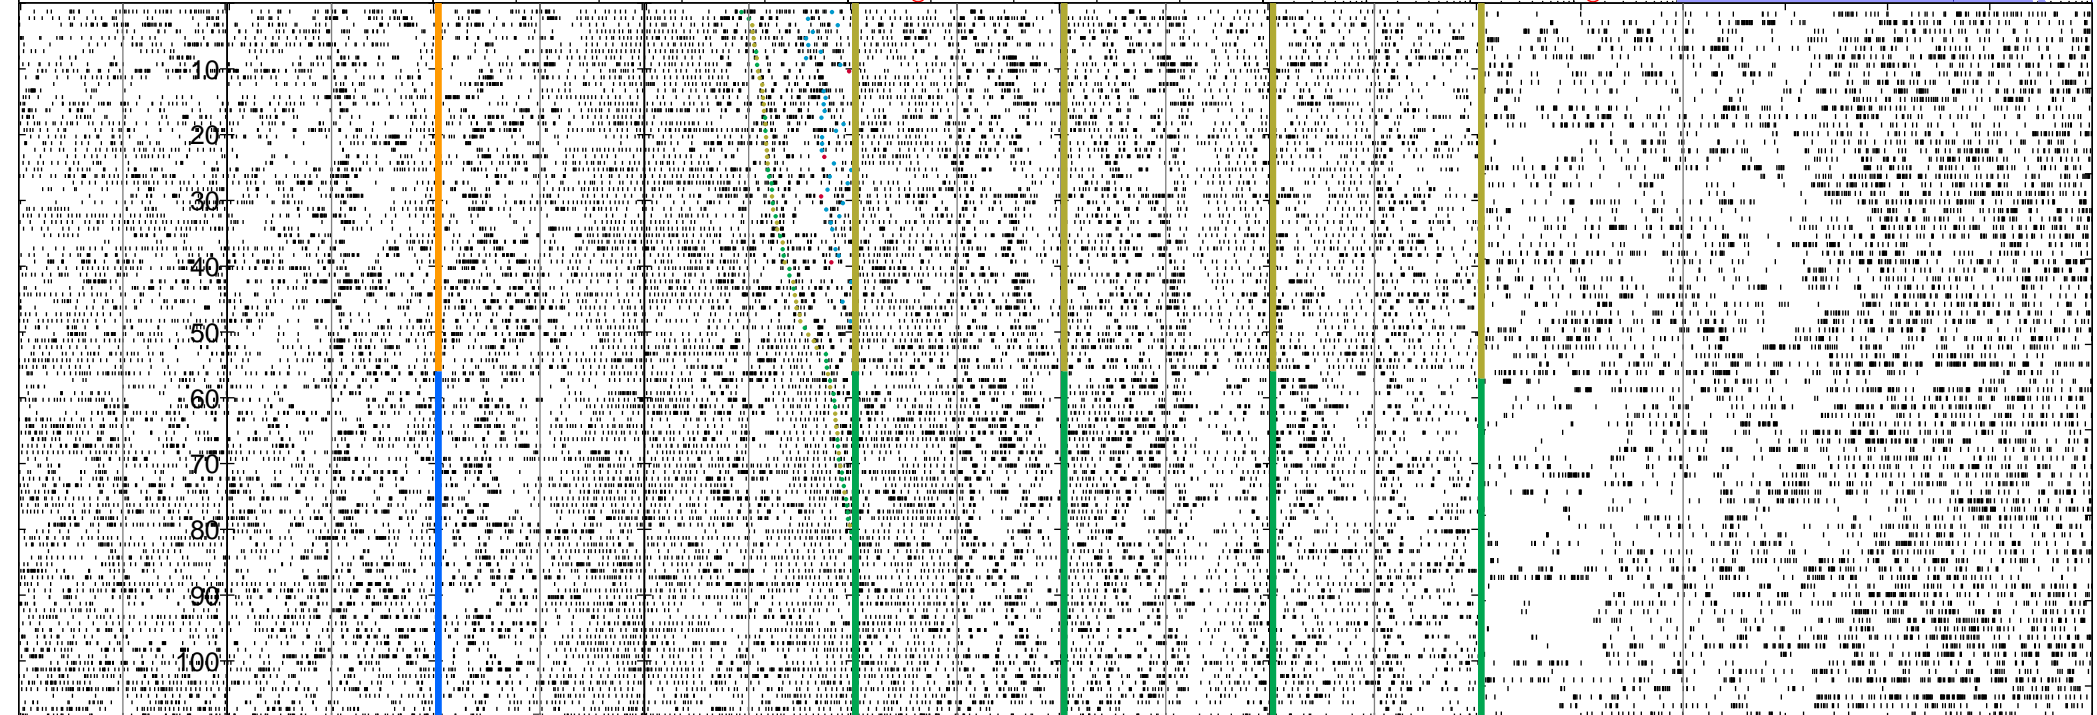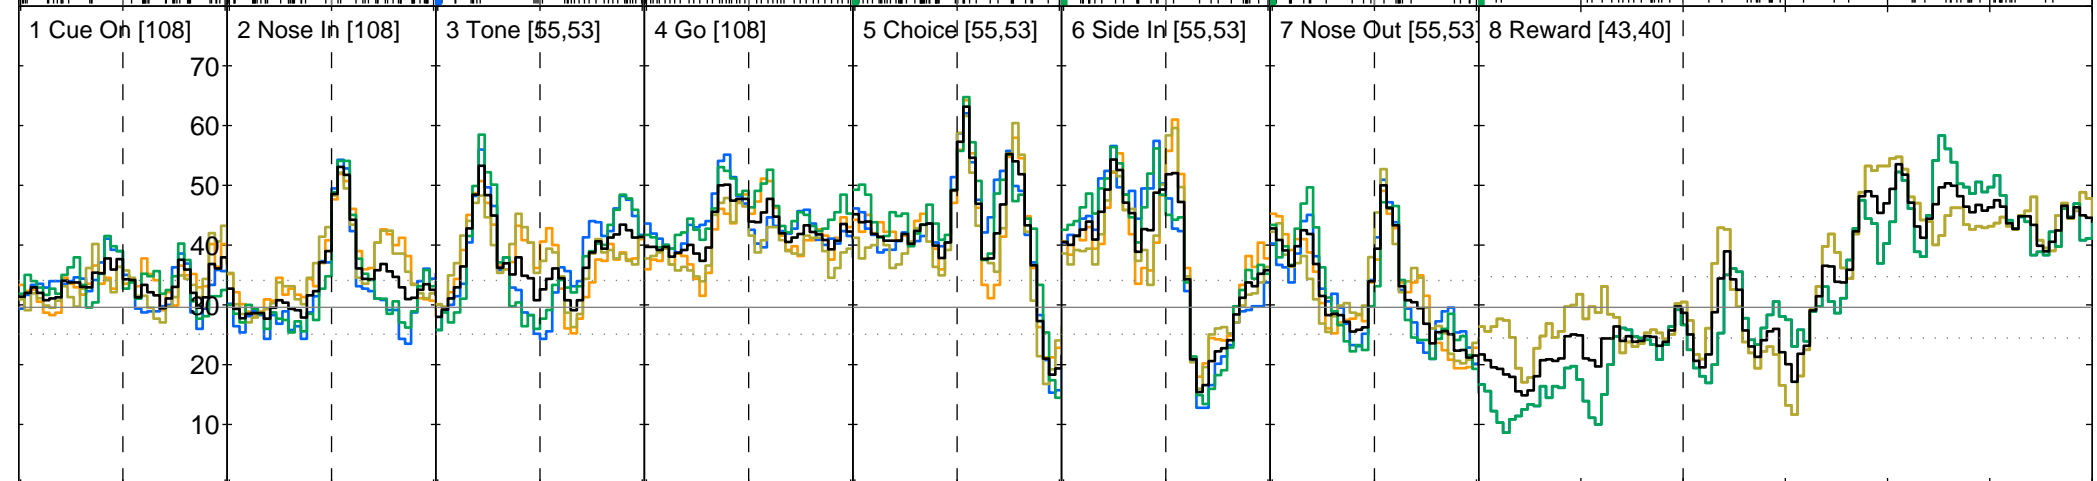

Cell: C0320070625T15a

AP: -2.3 ML: 4.6 DV: 7.4

w: 4 n: 71441  $P_{ISI>2}$ : 0.0082

1/2pw: 261 $\mu$ s p->v: 374 $\mu$ s

$\beta_T$ : -2.4  $\beta_D$ : -3.7

$\beta_P$ : 5 SI: -0.18

Session FR: 16.2 Hz

Pk Ev: 5 - Choice (Contra)

Pk FR: 29.4Hz (0.12s) GP

Waveform

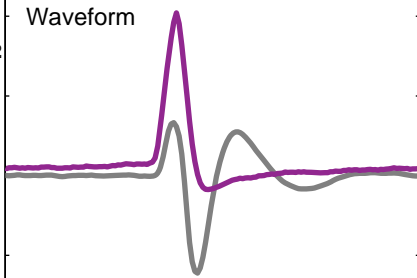

HP/PV

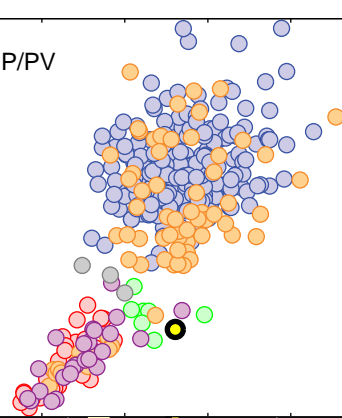

FR/PV

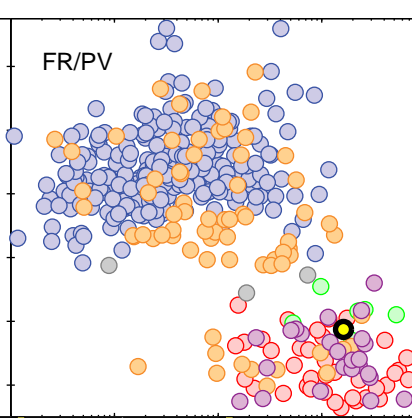

ISI Histogram [2907]

$10^{-2}$   $10^{-1}$   $10^0$

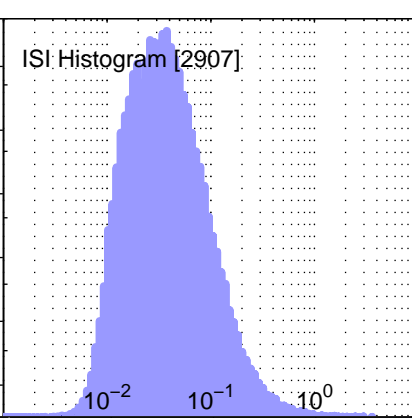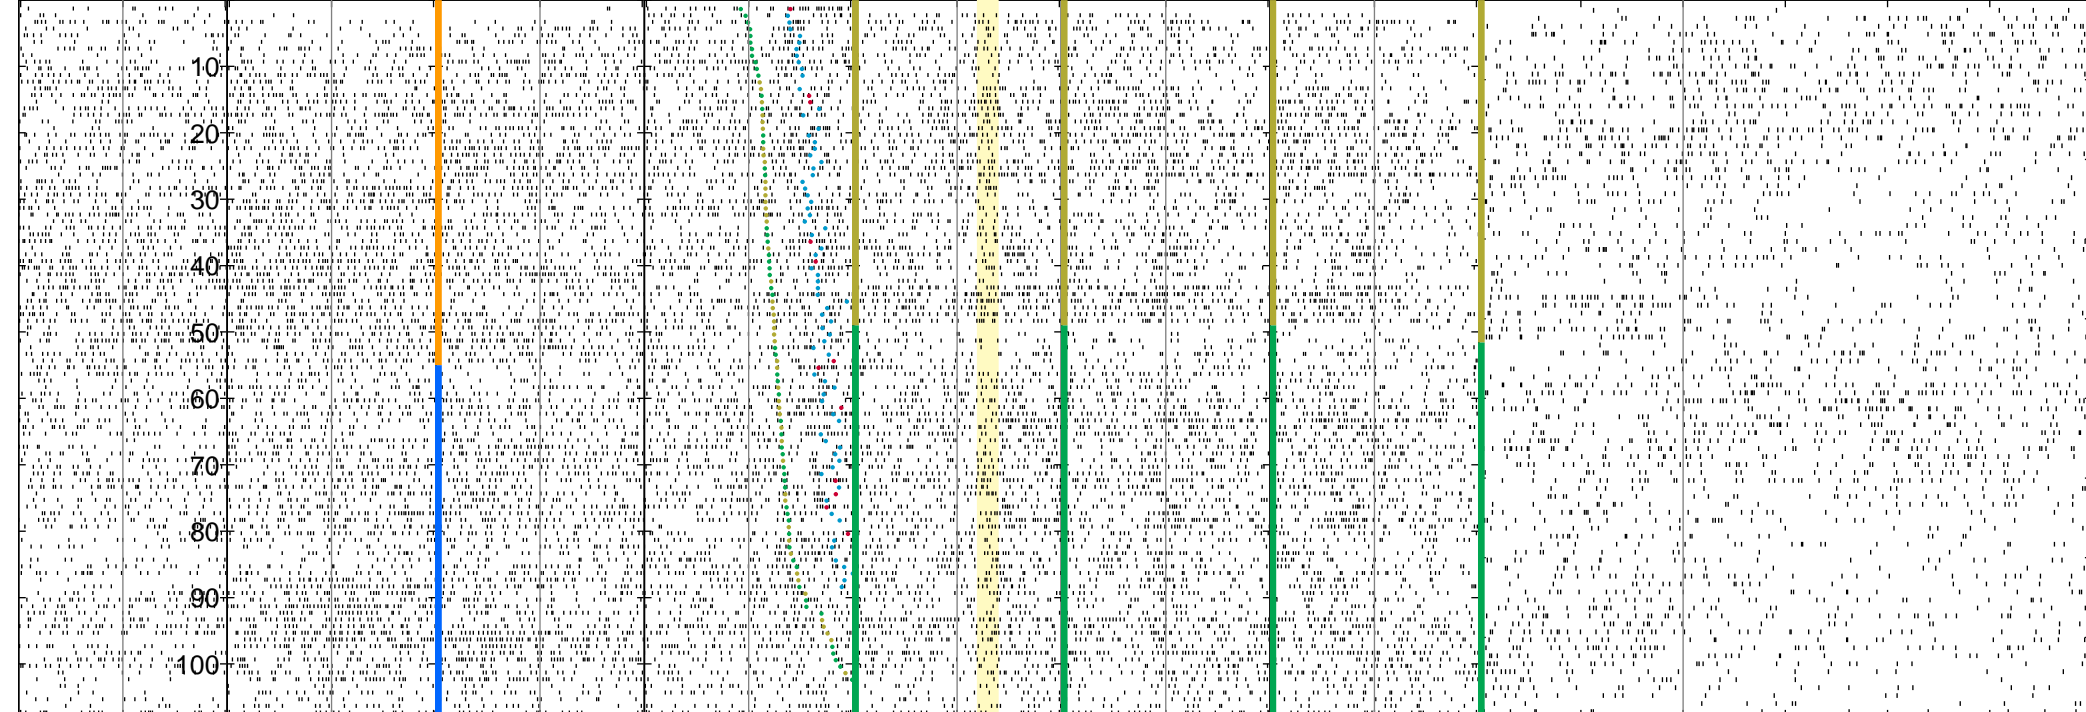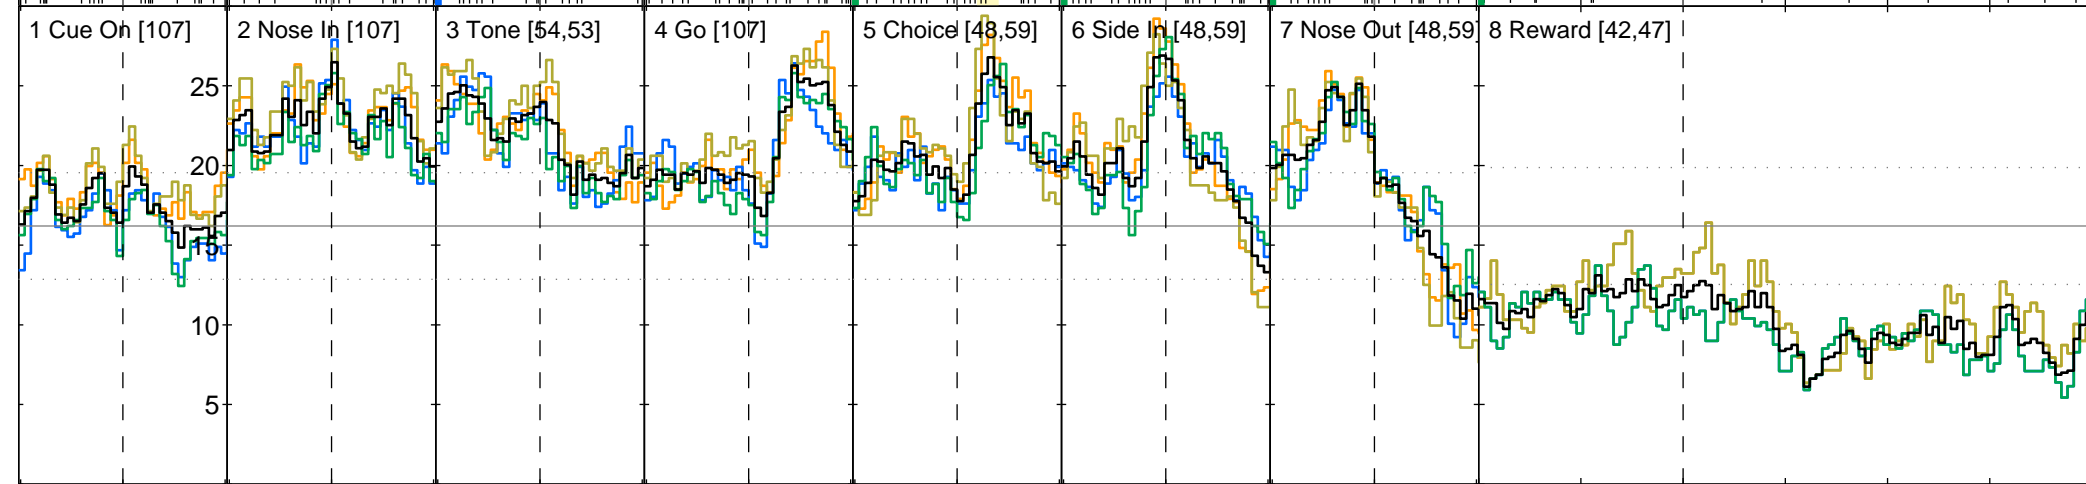



Cell: C1220071027T11a

AP: -2.8 ML: 4.2 DV: 6.9

w: 2 n: 130589  $P_{ISI>2}$ : 0

1/2pw: 150 $\mu$ s p->v: 330 $\mu$ s

$\beta_T$ : -3  $\beta_D$ : -3.9

$\beta_P$ : -2.8 SI: -0.26

Session FR: 26.1 Hz

Pk Ev: 5 - Choice (Contra)

Pk FR: 49.3Hz (0.18s) GP

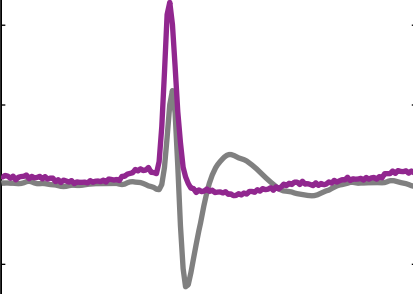

HP/PV

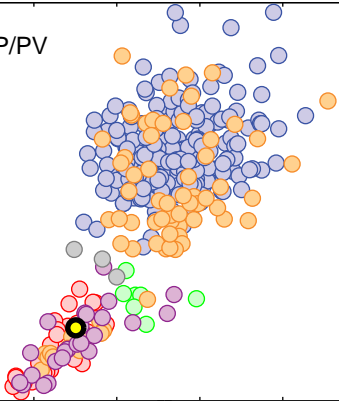

FR/PV

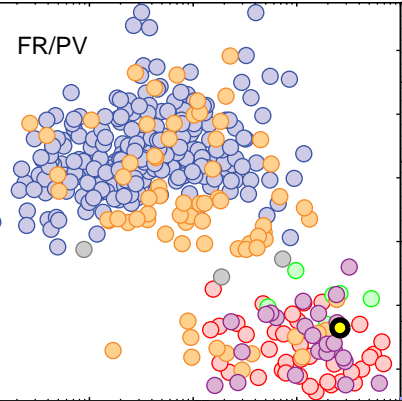

ISI Histogram [6061]

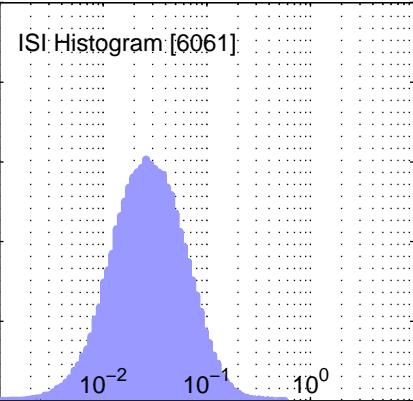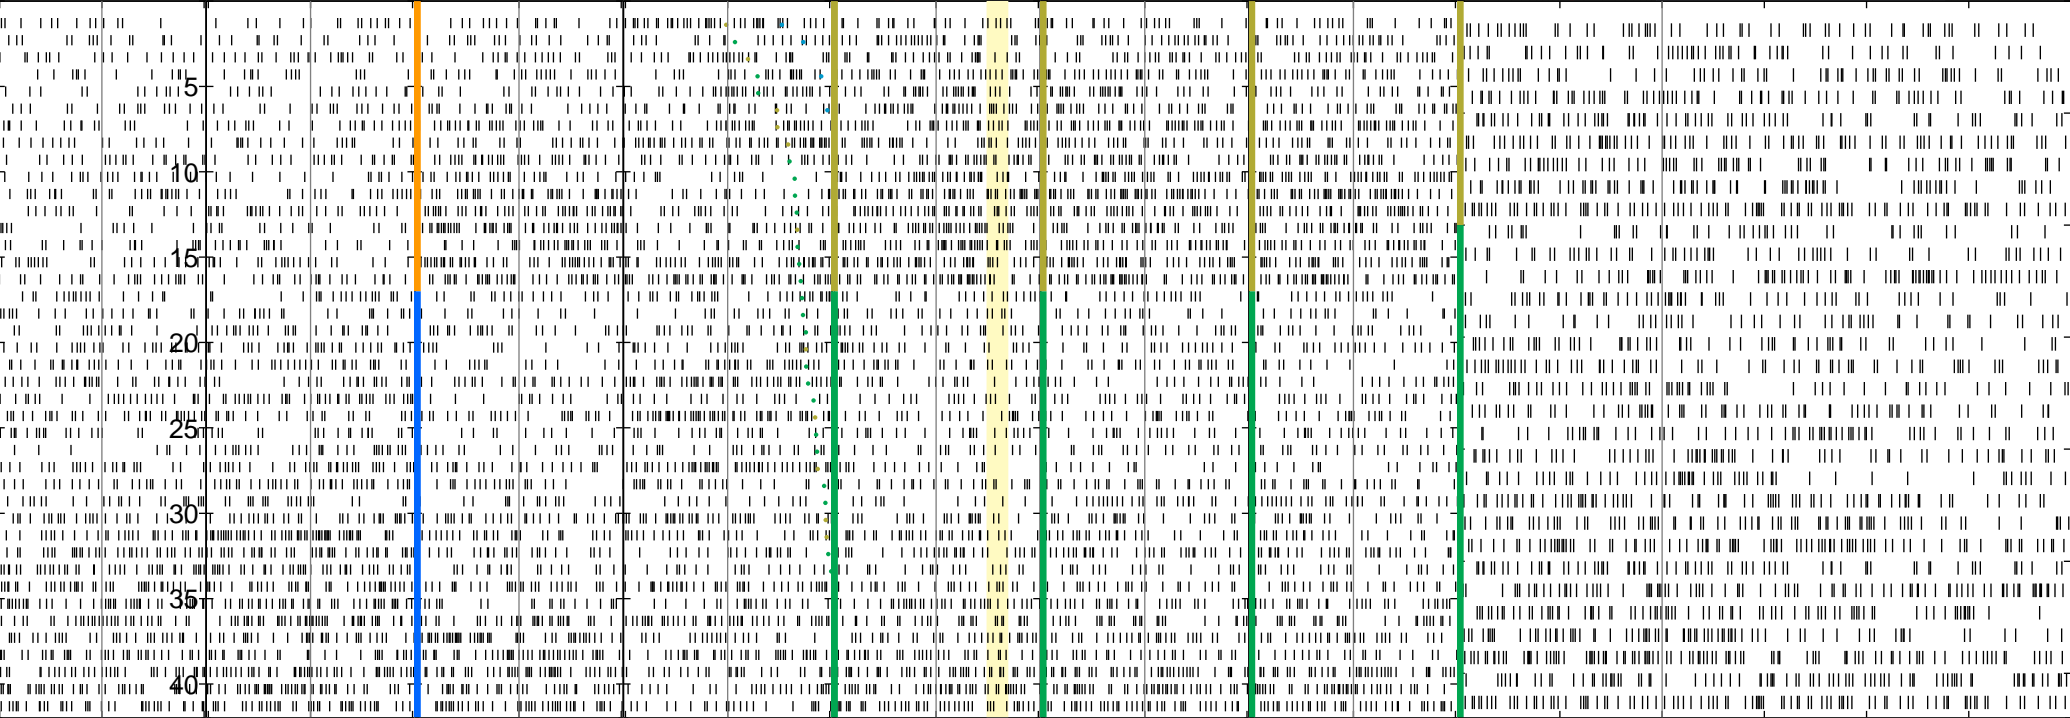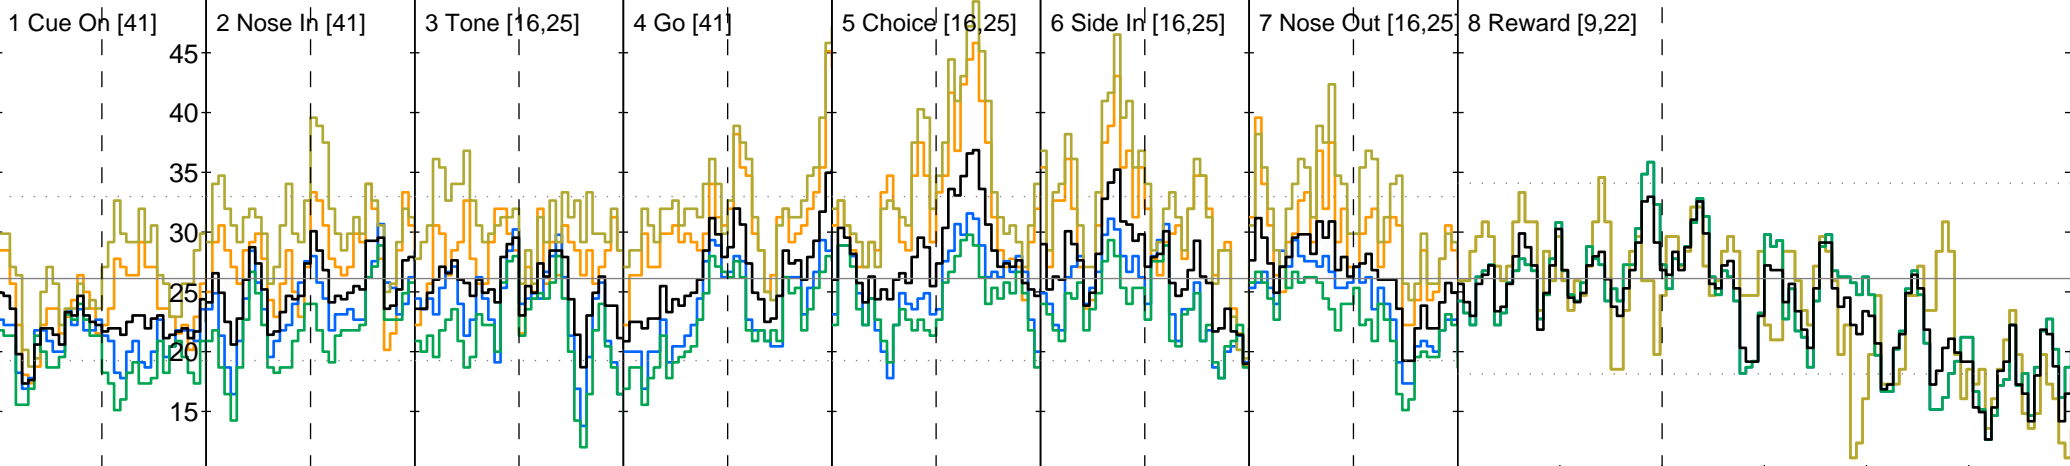

**Cell: C0320070624T15a**

AP: -2.3 ML: 4.6 DV: 7.3

w: 1 n: 86000  $P_{ISI>2}$ : 01/2pw: 141 $\mu$ s p->v: 262 $\mu$ s $\beta_T$ : -2.3  $\beta_D$ : -3.5 $\beta_P$ : -3.4 SI: -0.17

Session FR: 23 Hz

Pk Ev: 6 - Side In (Tone2)

Pk FR: 37.8Hz (-0.75s) GP

Waveform

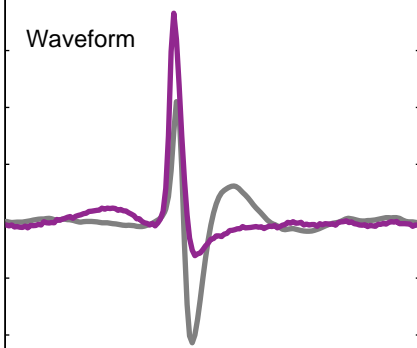

HP/PV

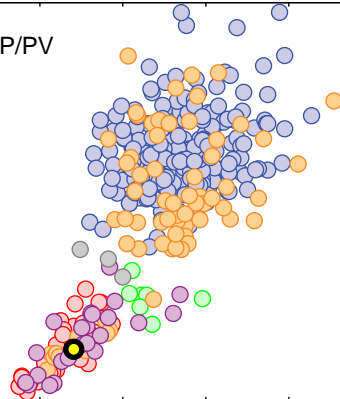

FR/PV

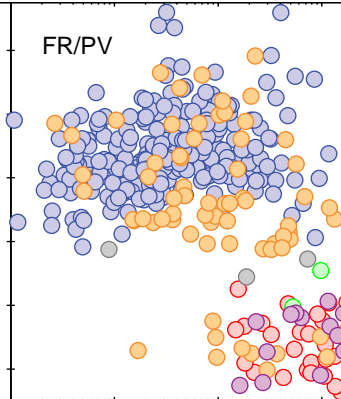

ISI Histogram [3719]

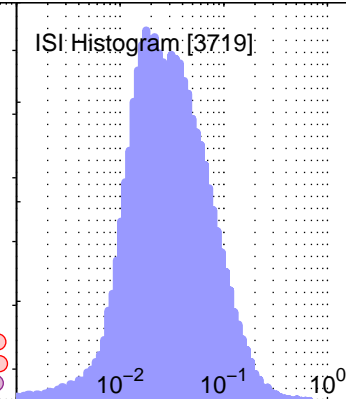

20

40

60

80

100

120

140

1 Cue Oh [143]

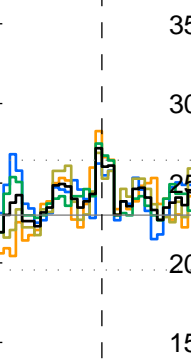

2 Nose In [143]

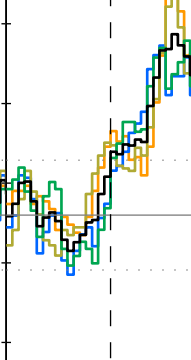

3 Tone [68,75]

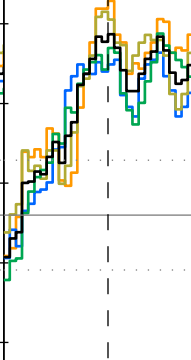

4 Go [143]

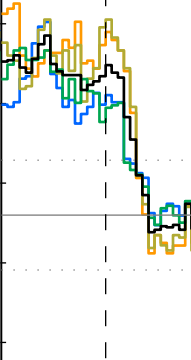

5 Choice [69,74]

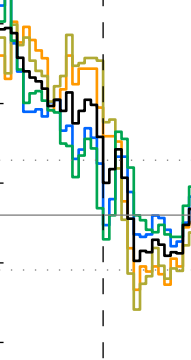

6 Side In [69,74]

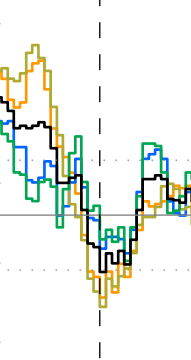

7 Nose Out [69,74]

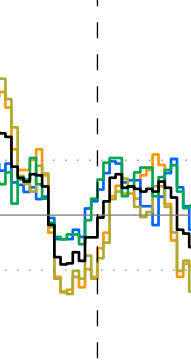

8 Reward [54,61]

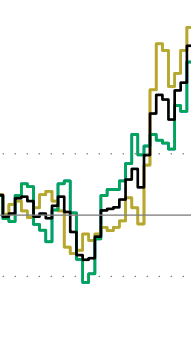

**Cell: C0320070627T15c**

AP: -2.3 ML: 4.6 DV: 7.7

w: 1 n: 39798  $P_{ISI>2}$ : 0

1/2pw: 190 $\mu$ s p $\rightarrow$ v: 413 $\mu$ s

$\beta_T$ : -2.7  $\beta_D$ : -3.5

$\beta_P$ : -3.1 SI: -0.16

Session FR: 11.5 Hz

Pk Ev: 6 - Side In (Tone1)

Pk FR: 17Hz (-0.36s) **GP**

Waveform

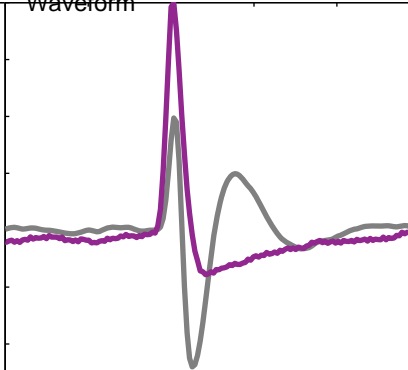

HP/PV

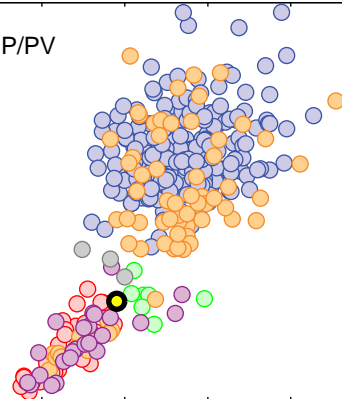

FR/PV

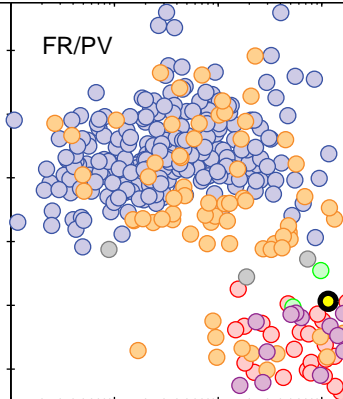

ISI Histogram [1917]

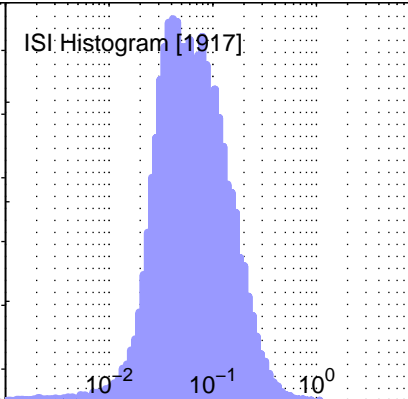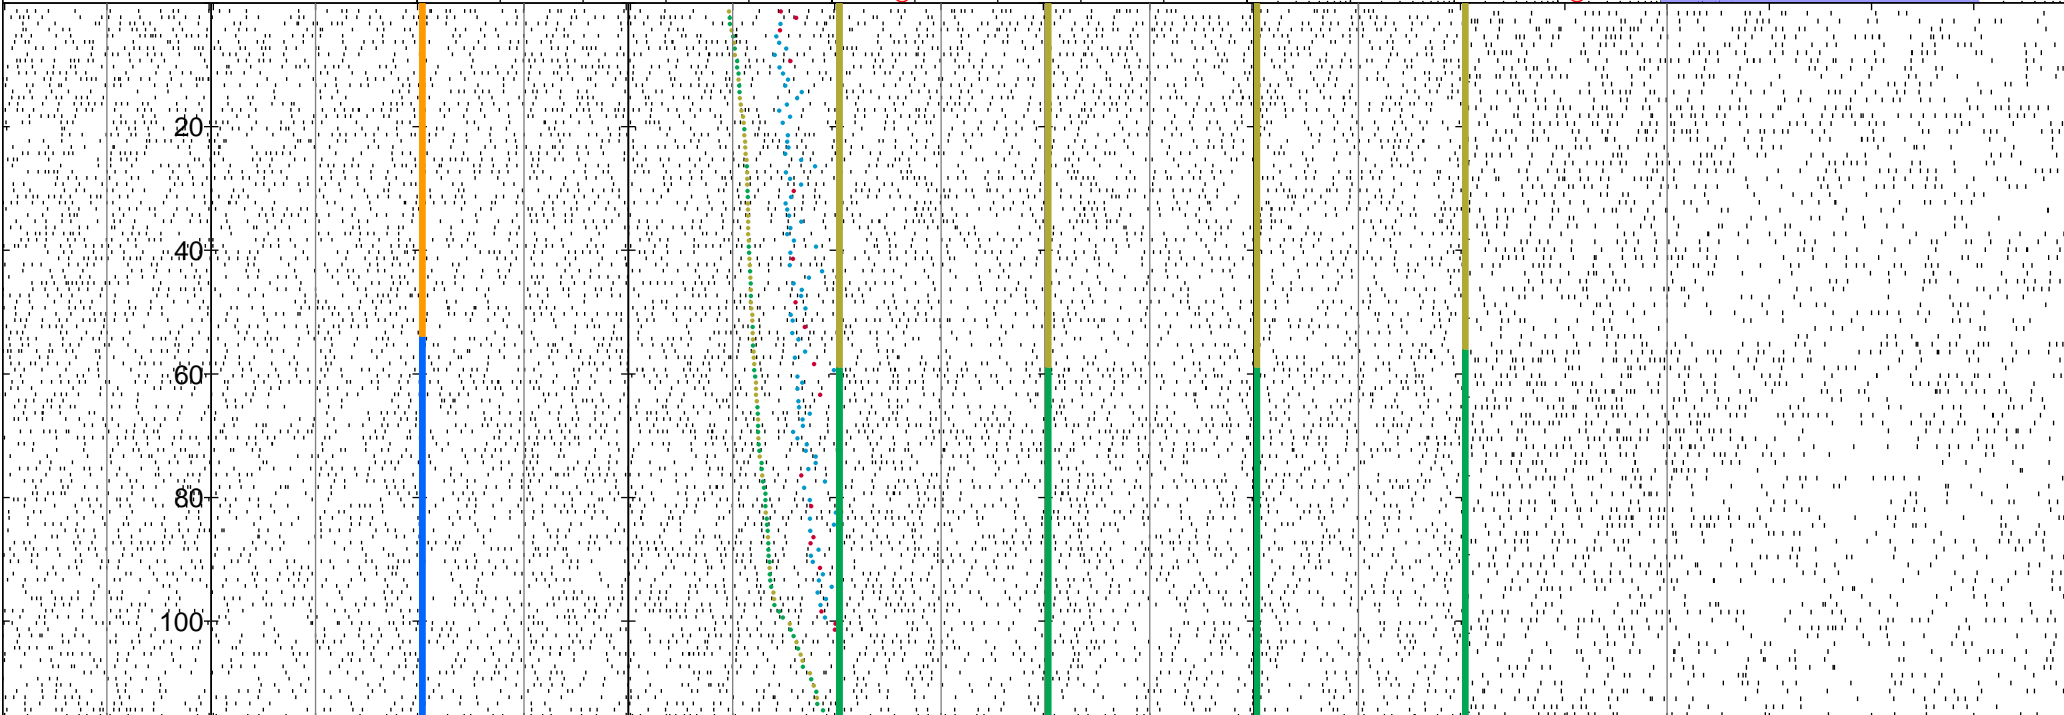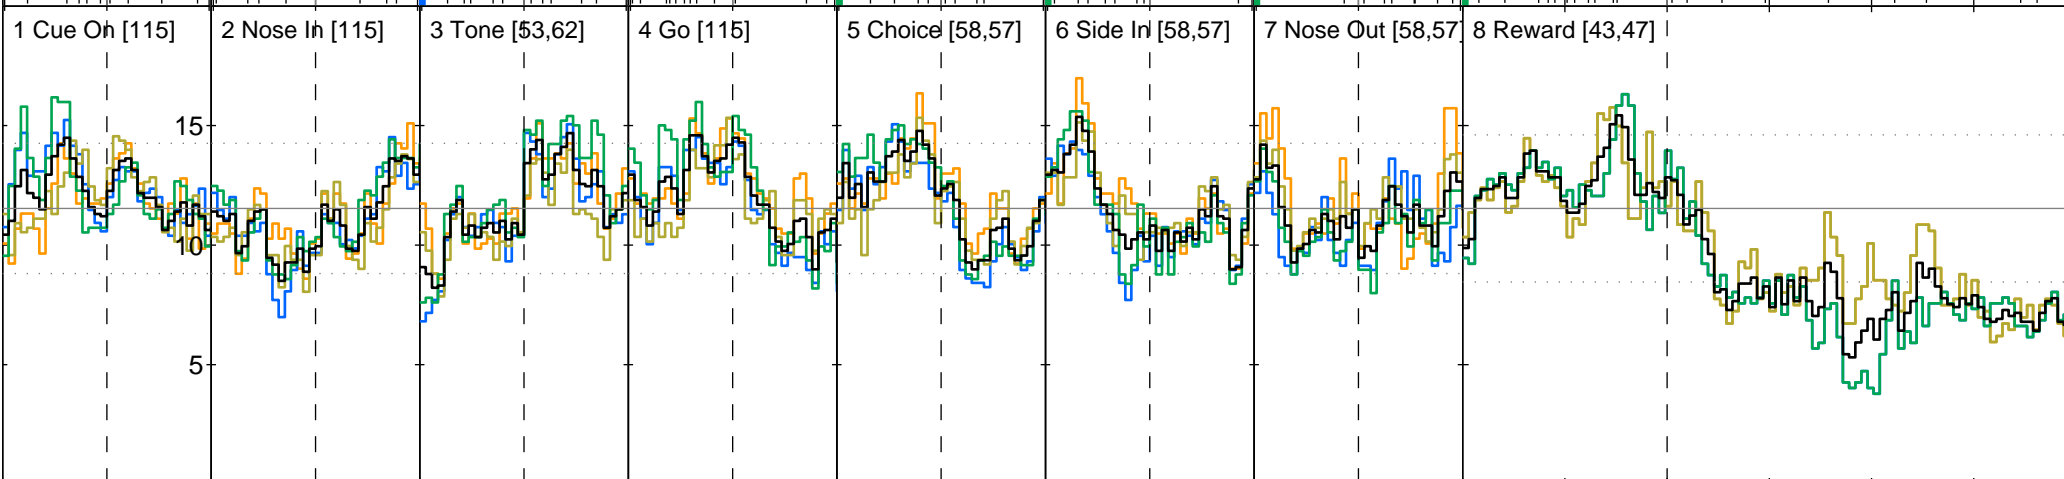

Cell: C0320070621T15d

AP: -2.3 ML: 4.6 DV: 6.8

w: 3 n: 9077  $P_{ISI>2}$ : 0.18

1/2pw: 138 $\mu$ s p $\rightarrow$ v: 254 $\mu$ s

$\beta_T$ : -3.1  $\beta_D$ : -3.1

$\beta_P$ : -3 SI: -0.73

Session FR: 2.96 Hz

Pk Ev: 6 - Side In (Contra)

Pk FR: 8.44Hz (0.09s) GP

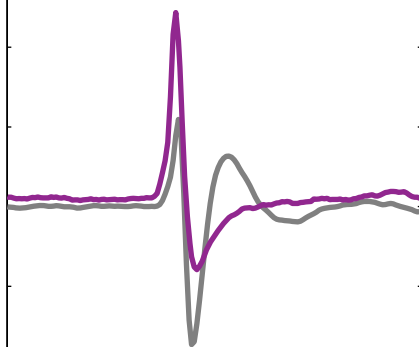

HP/PV

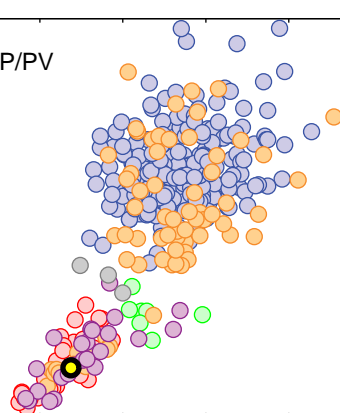

FR/PV

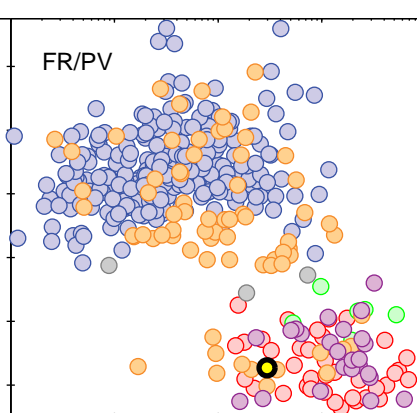

ISI Histogram [234]

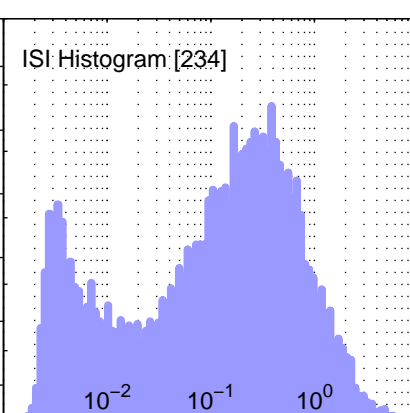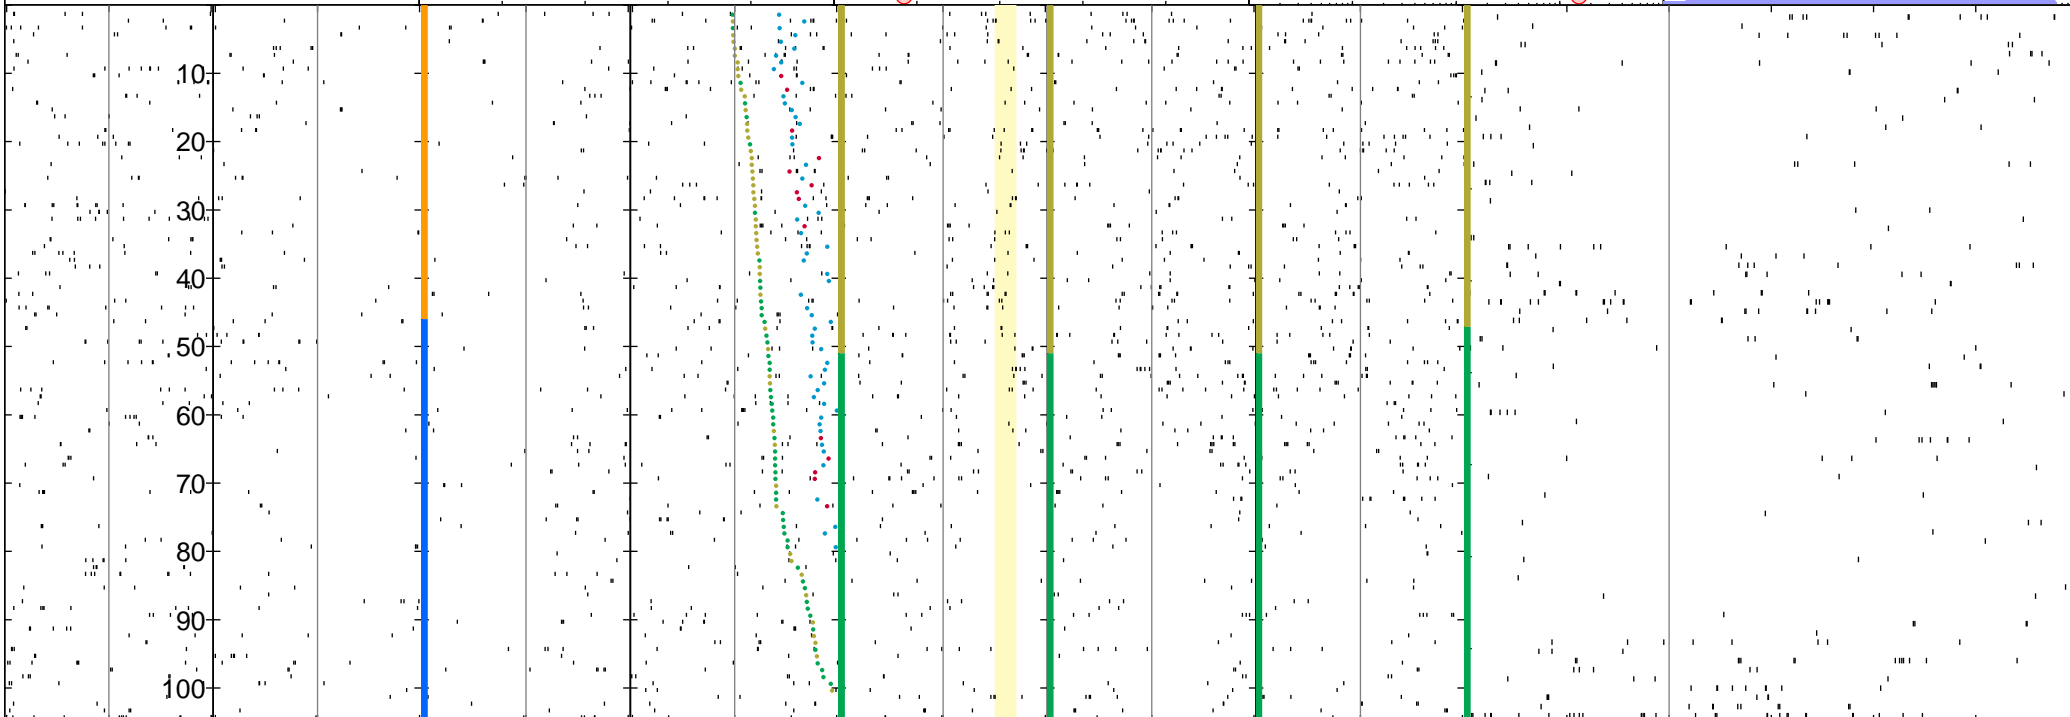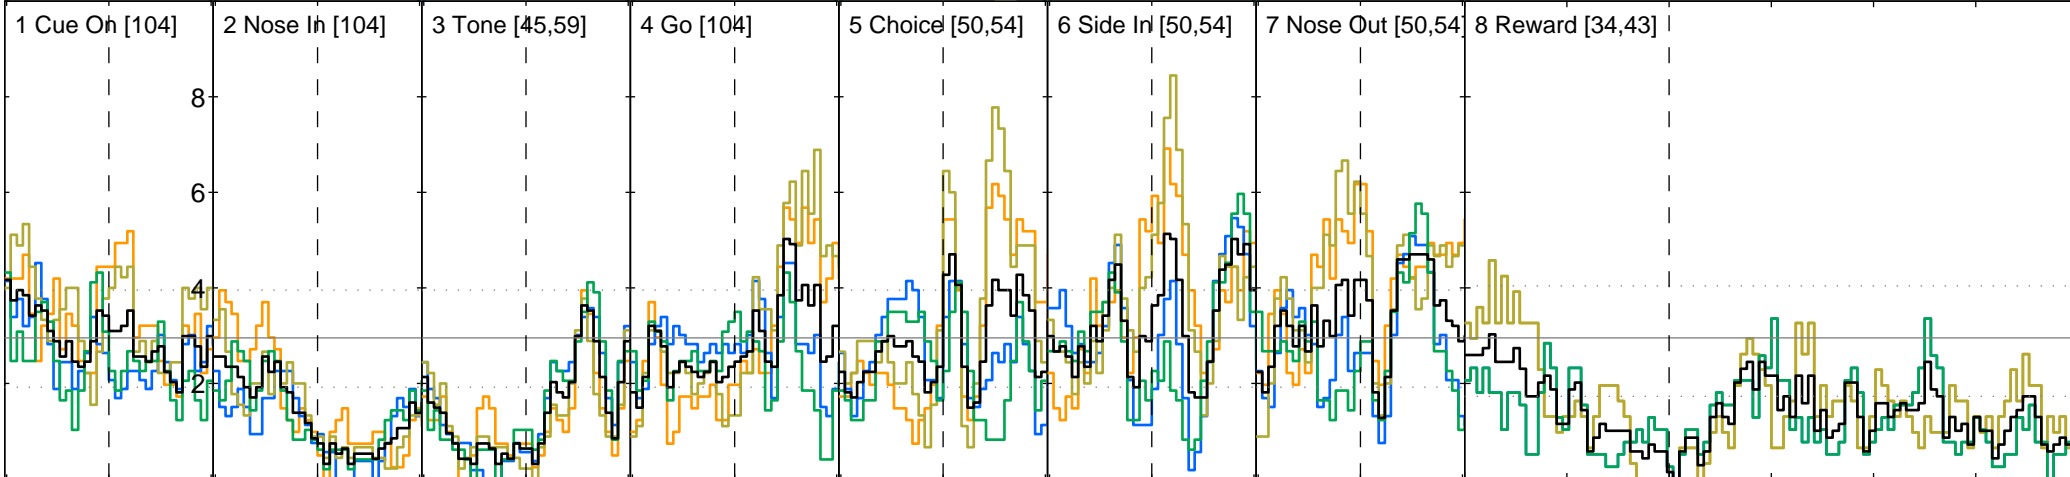

Cell: C0320070621T15c

AP: -2.3 ML: 4.6 DV: 6.8

w: 3 n: 50059  $P_{ISI>2}$ : 0

1/2pw: 166 $\mu$ s p->v: 256 $\mu$ s

$\beta_T$ : 2.6  $\beta_D$ : 6.5

$\beta_P$ : -3.2 SI: 0.5

Session FR: 16.3 Hz

Pk Ev: 7 - Nose out (Tone2)

Pk FR: 38.4Hz (0.3s) GP

Waveform

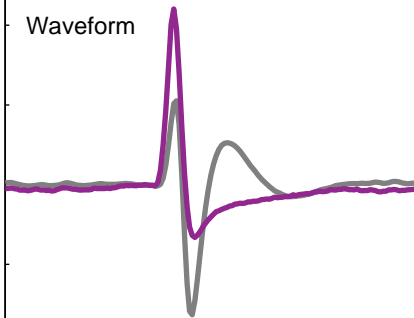

HP/PV

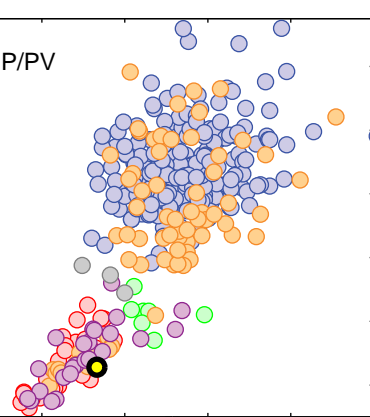

FR/PV

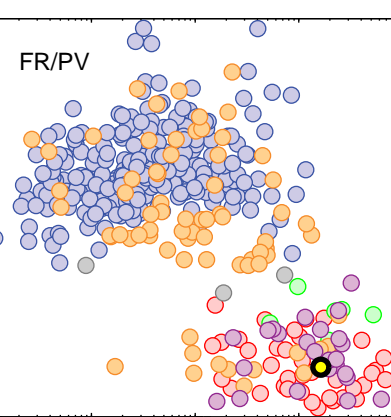

ISI Histogram [1862]

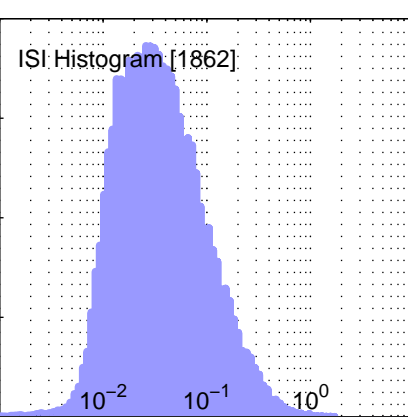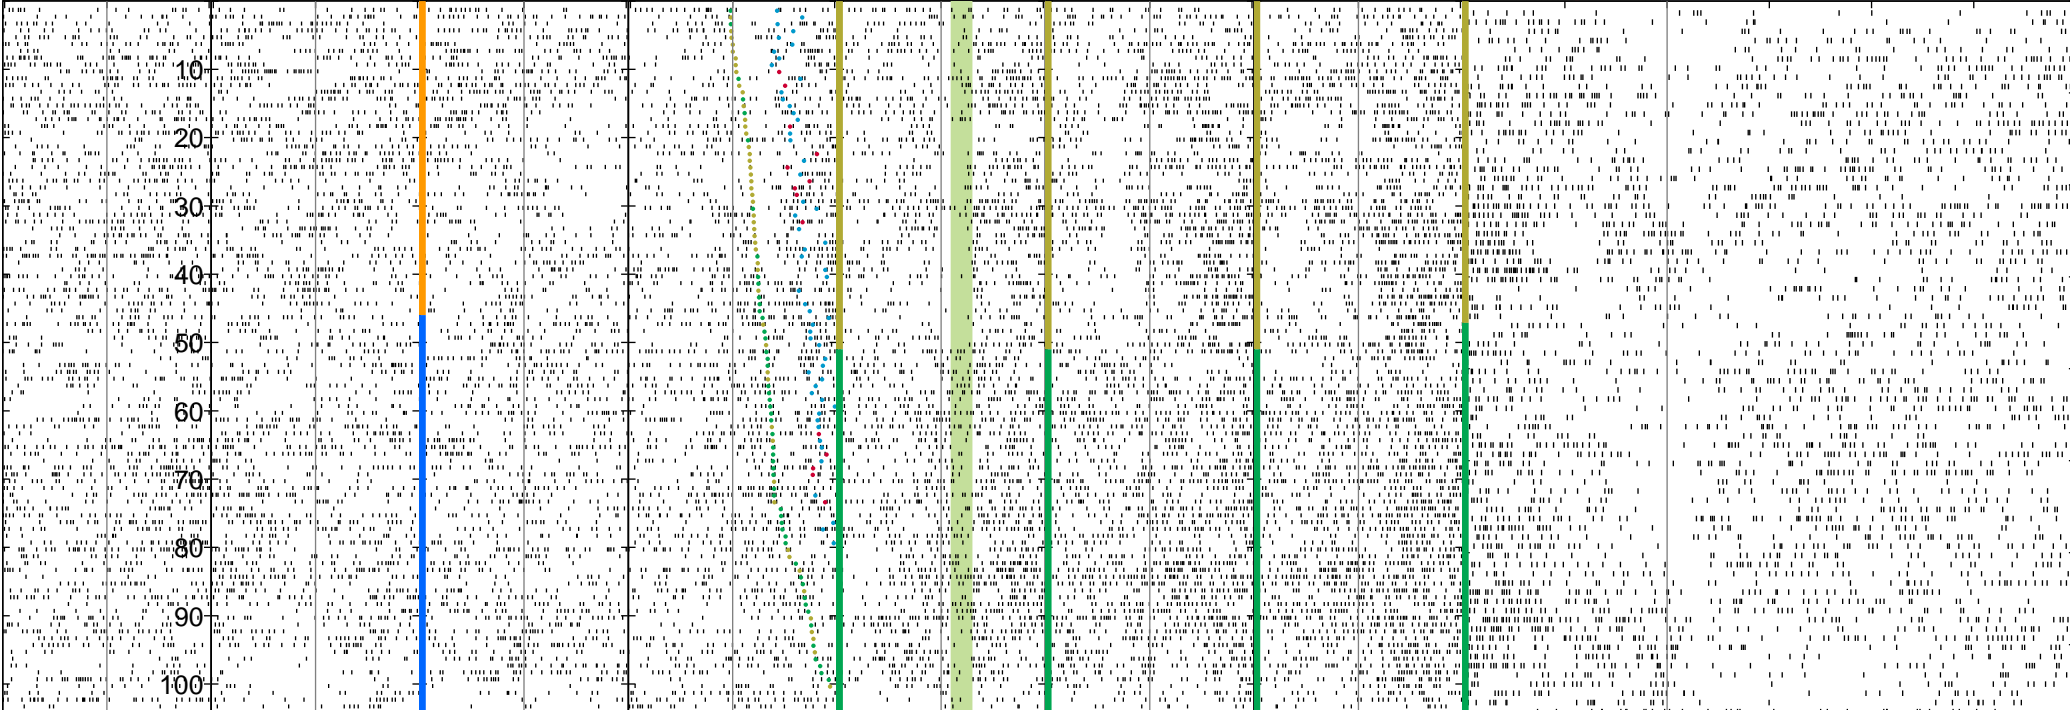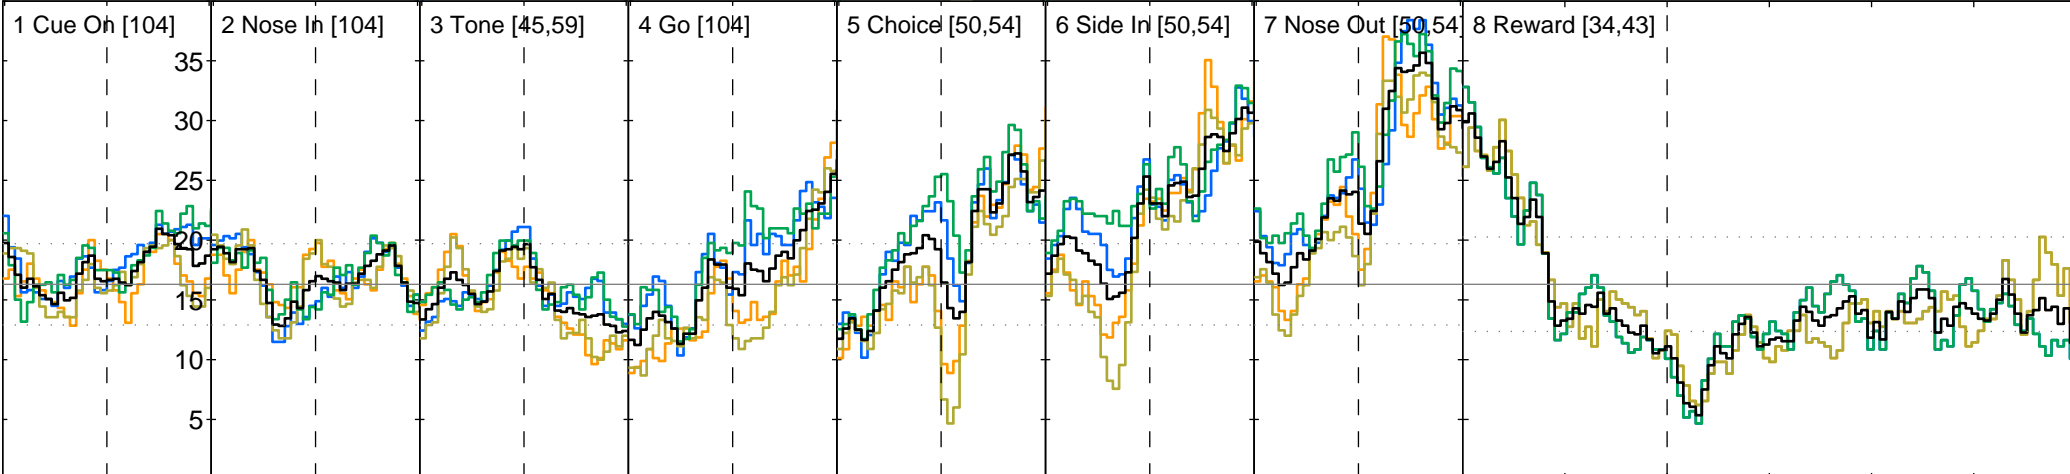



Cell: C0320070627T15a

AP: -2.3 ML: 4.6 DV: 7.7

w: 2 n: 97352  $P_{ISI>2}$ : 0

1/2pw: 134 $\mu$ s p->v: 235 $\mu$ s

$\beta_T$ : -2.7  $\beta_D$ : -4.2

$\beta_P$ : 4.9 SI: -0.42

Session FR: 28.2 Hz

Pk Ev: 7 - Nose out (Tone1)

Pk FR: 60.6Hz (0.42s) GP

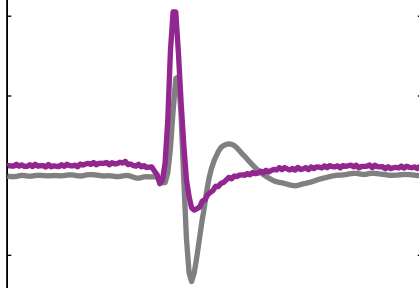

HP/PV

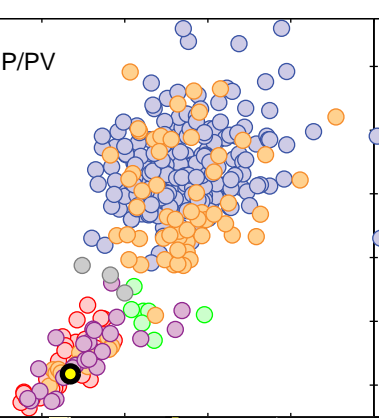

FR/PV

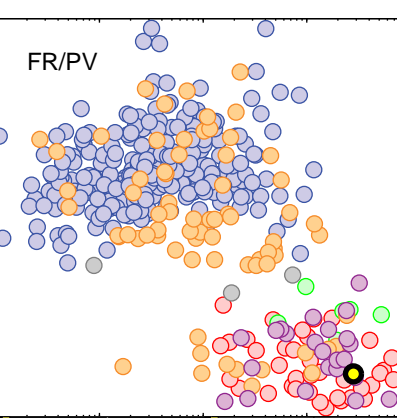

ISI Histogram [4811]

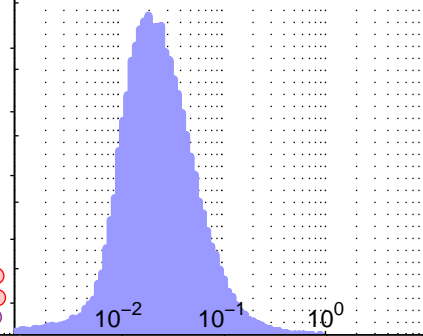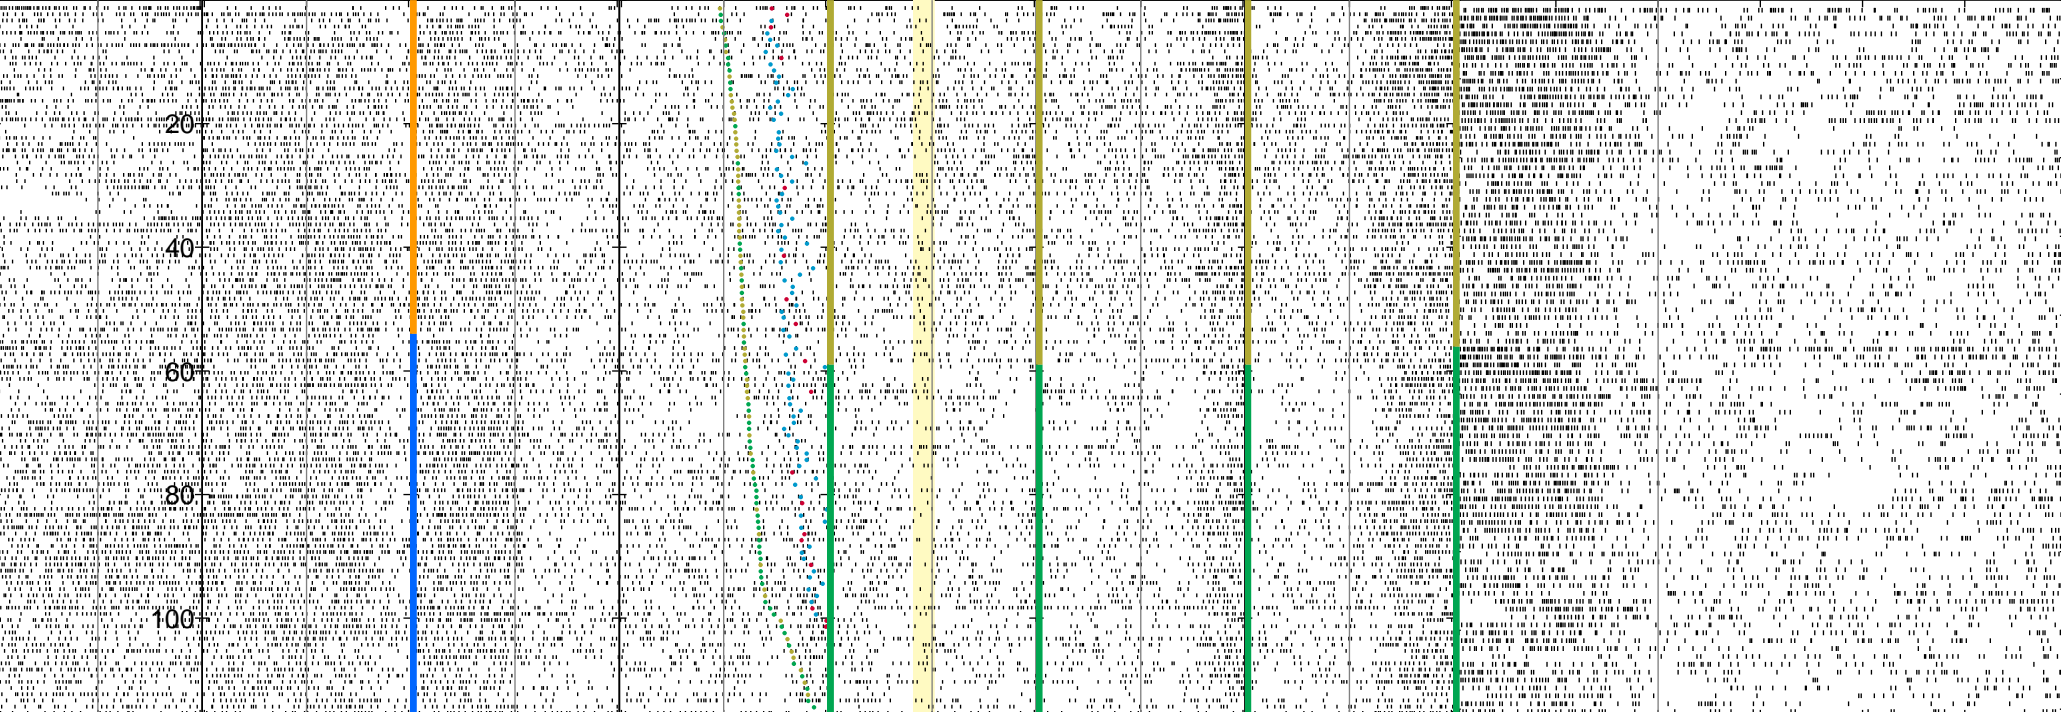

1 Cue On [115] 2 Nose In [115] 3 Tone [53,62] 4 Go [115] 5 Choice [58,57] 6 Side In [58,57] 7 Nose Out [58,57] 8 Reward [43,47]

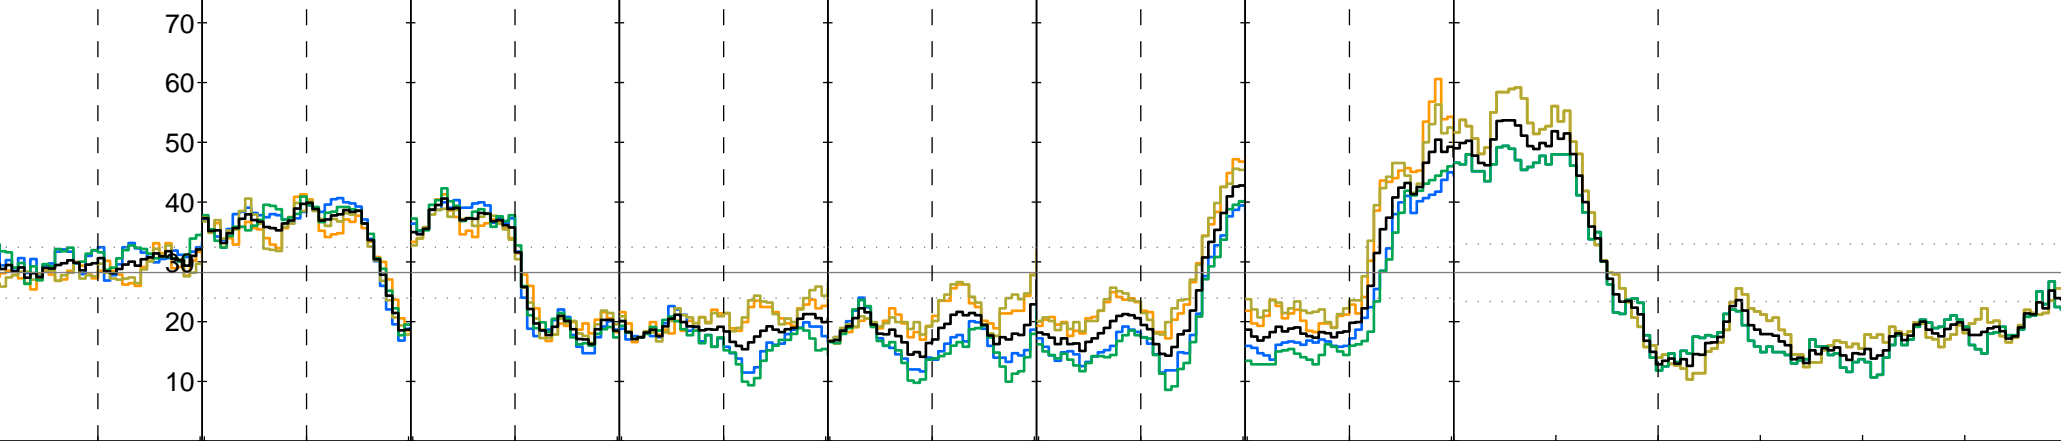

Cell: C0320070621T15b

AP: -2.3 ML: 4.6 DV: 6.8

w: 4 n: 43737  $P_{ISI>2}$ : 0.0017

1/2pw: 173 $\mu$ s p $\rightarrow$ v: 306 $\mu$ s

$\beta_T$ : -2.5  $\beta_D$ : 2.8

$\beta_P$ : 3.3 SI: 0.26

Session FR: 14.2 Hz

Pk Ev: 7 - Nose out (Ipsi)

Pk FR: 30.7Hz (0.63s) GP

Waveform

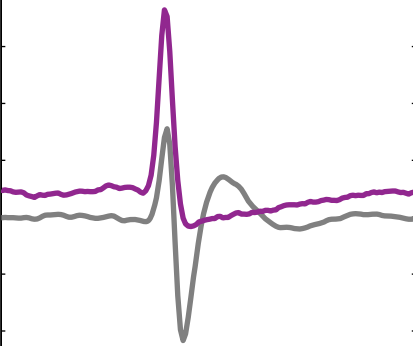

HP/PV

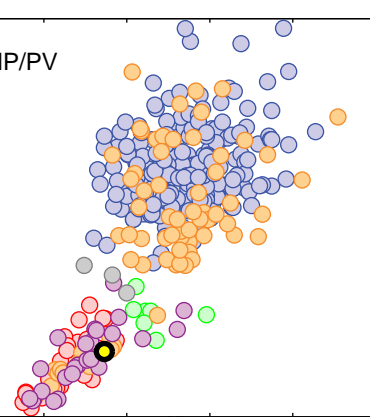

FR/PV

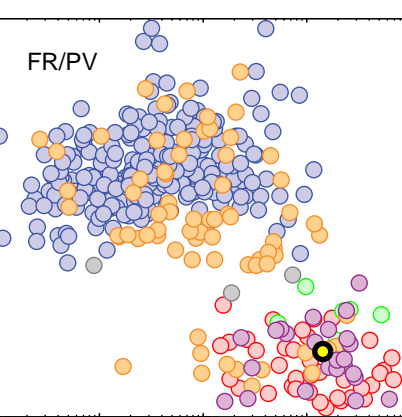

ISI Histogram [1519]

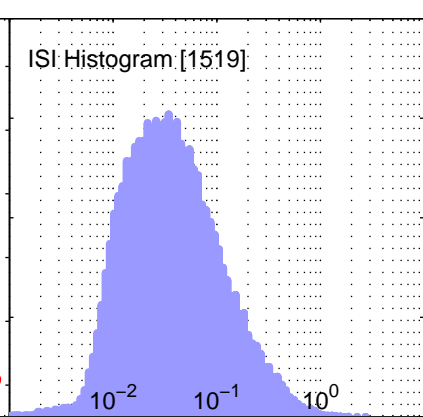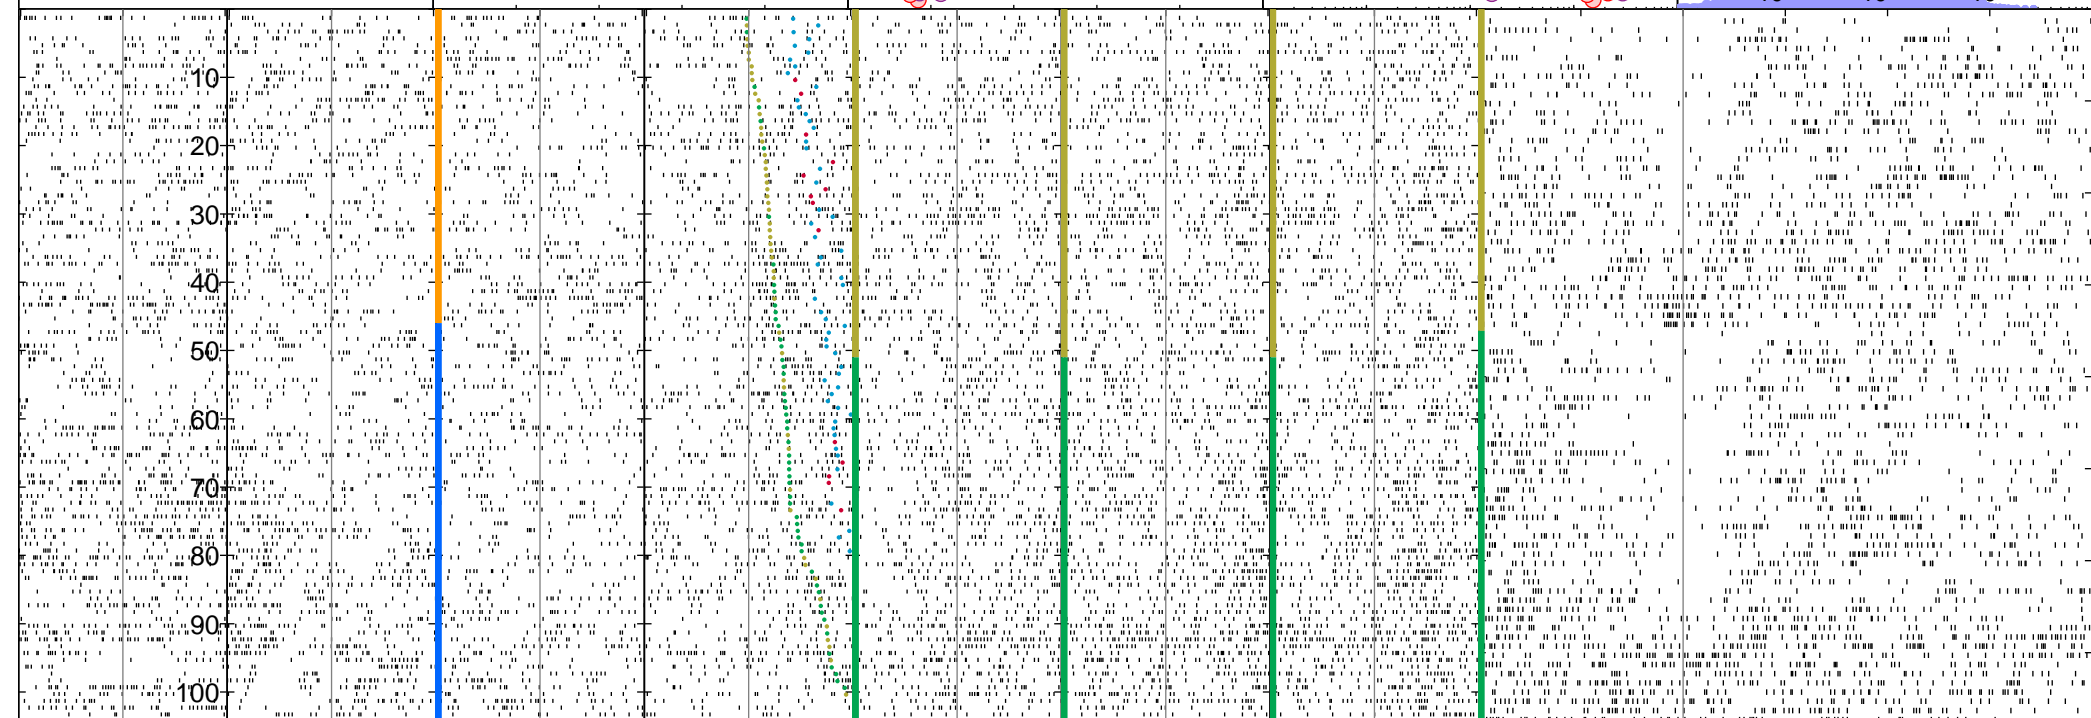

1 Cue On [104]

2 Nose In [104]

3 Tone [45,59]

4 Go [104]

5 Choice [50,54]

6 Side In [50,54]

7 Nose Out [50,54]

8 Reward [34,43]

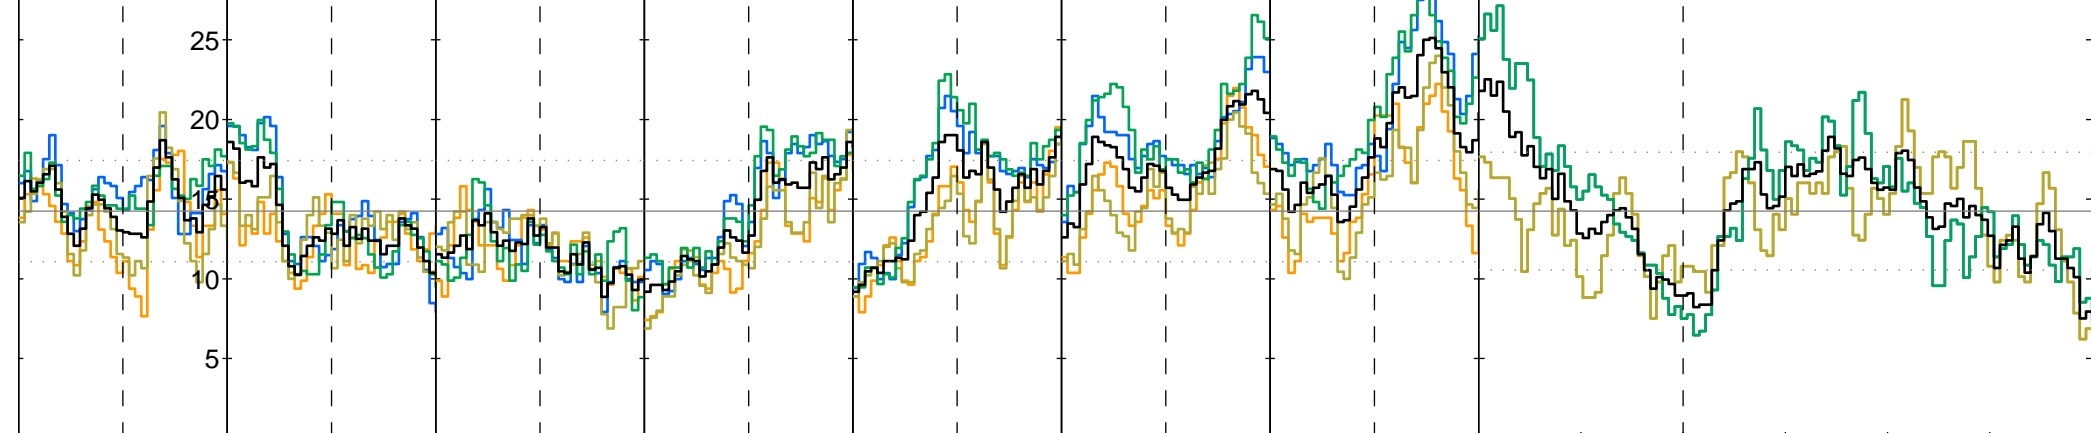

Cell: C0320070624T15b

AP: -2.3 ML: 4.6 DV: 7.3

w: 1 n: 91366  $P_{ISI>2}$ : 0

1/2pw: 219 $\mu$ s p $\rightarrow$ v: 346 $\mu$ s

$\beta_T$ : -2.9  $\beta_D$ : 4.9

$\beta_P$ : 3.4 SI: 0.18

Session FR: 24.4 Hz

Pk Ev: 7 - Nose out (Tone1)

Pk FR: 35.8Hz (0.87s) GP

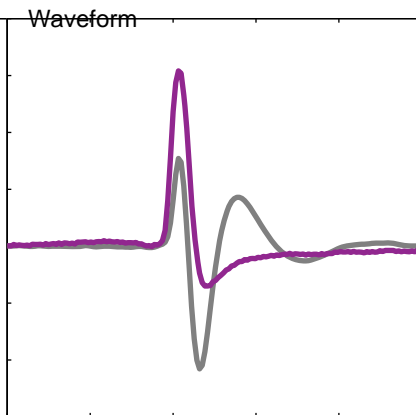

HP/PV

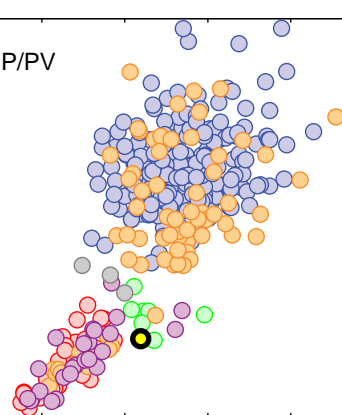

FR/PV

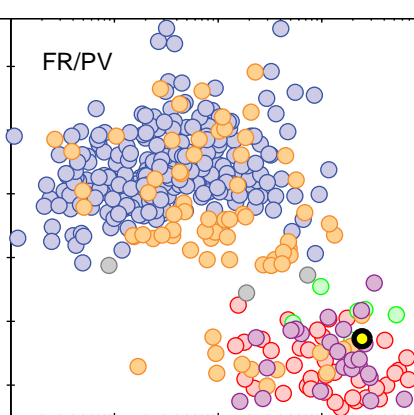

ISI Histogram [5001]

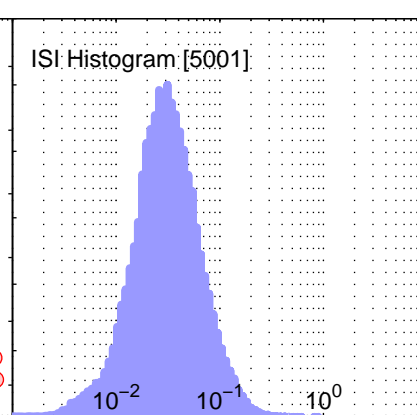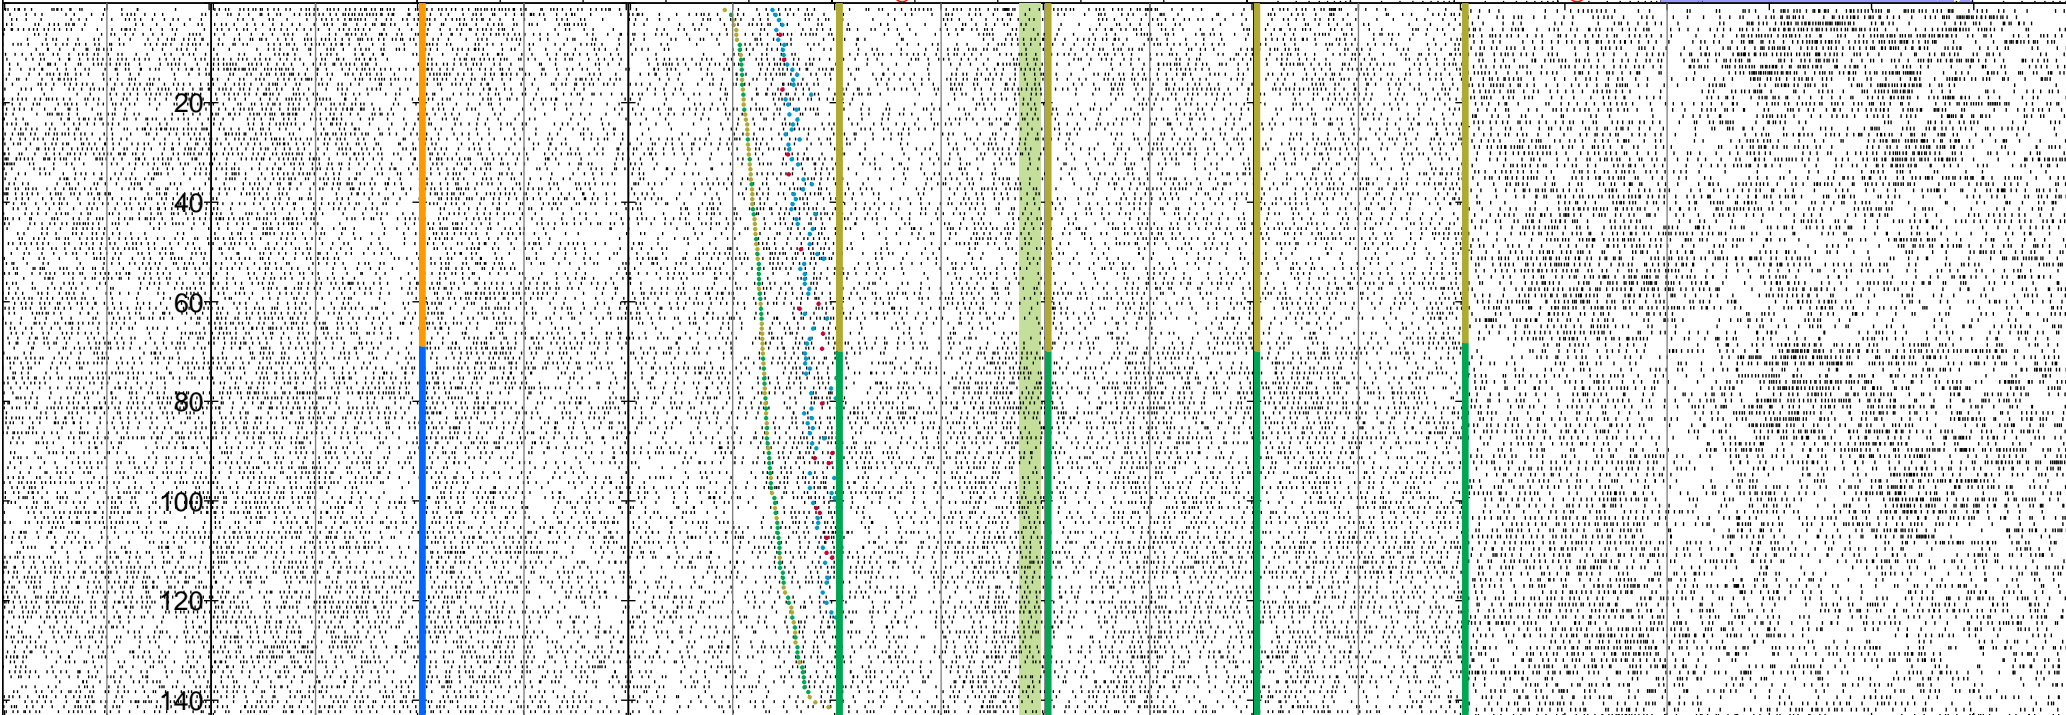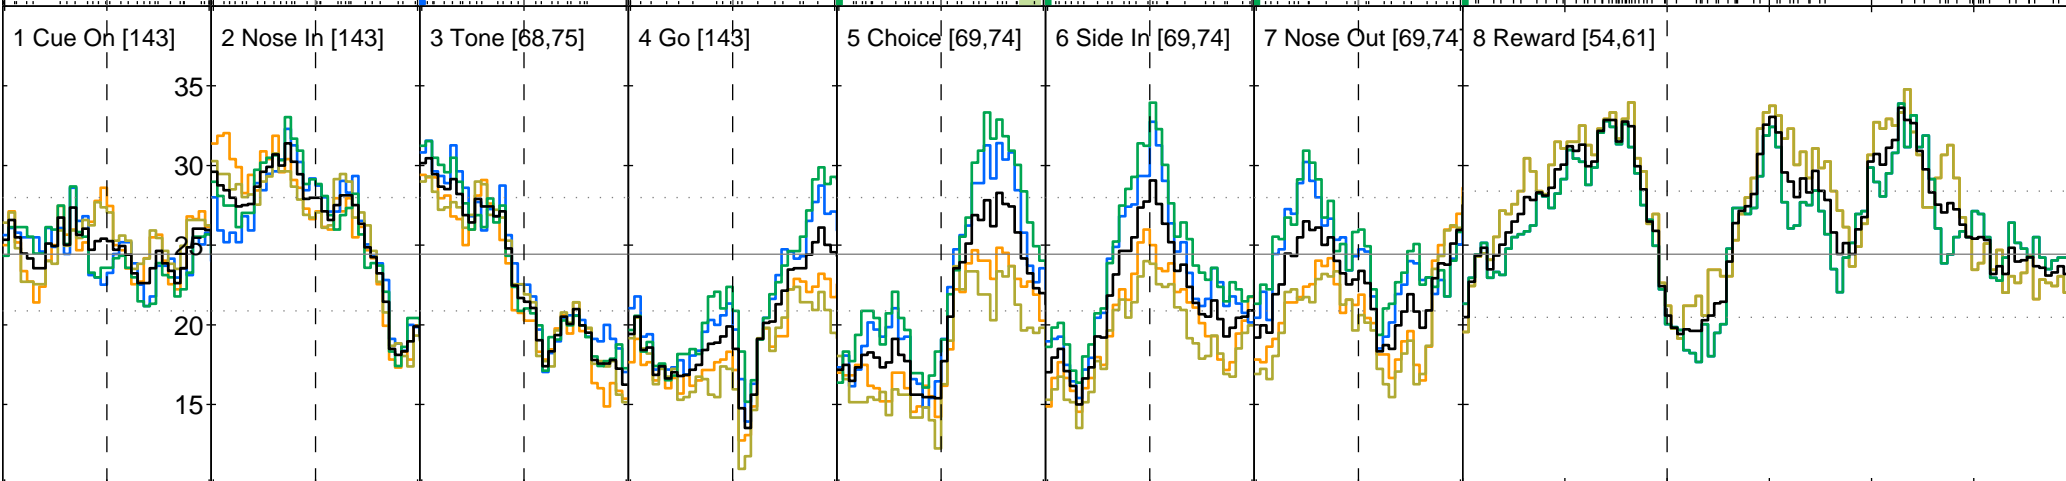



Cell: C0320070627T15b

AP: -2.3 ML: 4.6 DV: 7.7

w: 1 n: 21944  $P_{ISI>2}$ : 0

1/2pw: 182 $\mu$ s p $\rightarrow$ v: 362 $\mu$ s

$\beta_T$ : 2.6  $\beta_D$ : 3.1

$\beta_P$ : -3.4 SI: 0.33

Session FR: 6.36 Hz

Pk Ev: 8 - Reward (T1/Con)

Pk FR: 10.6Hz (-0.52s) GP

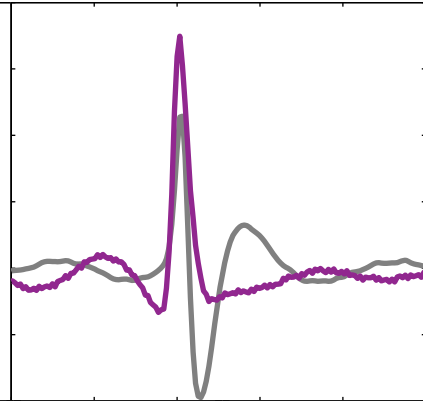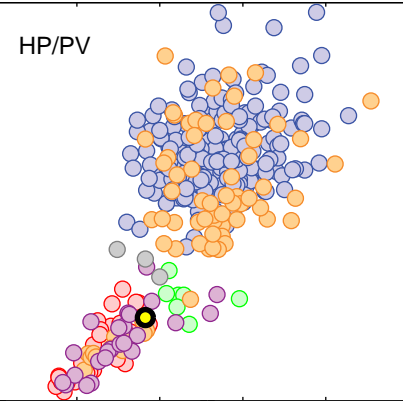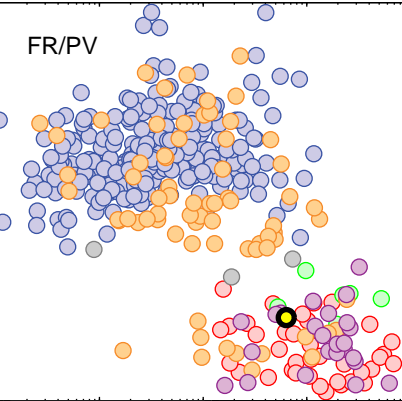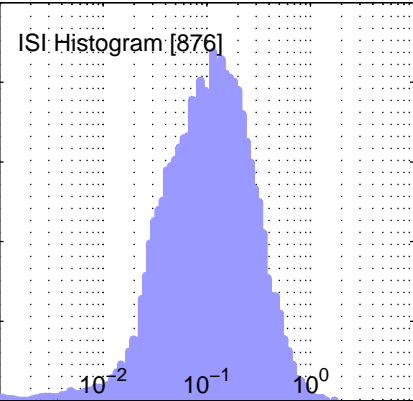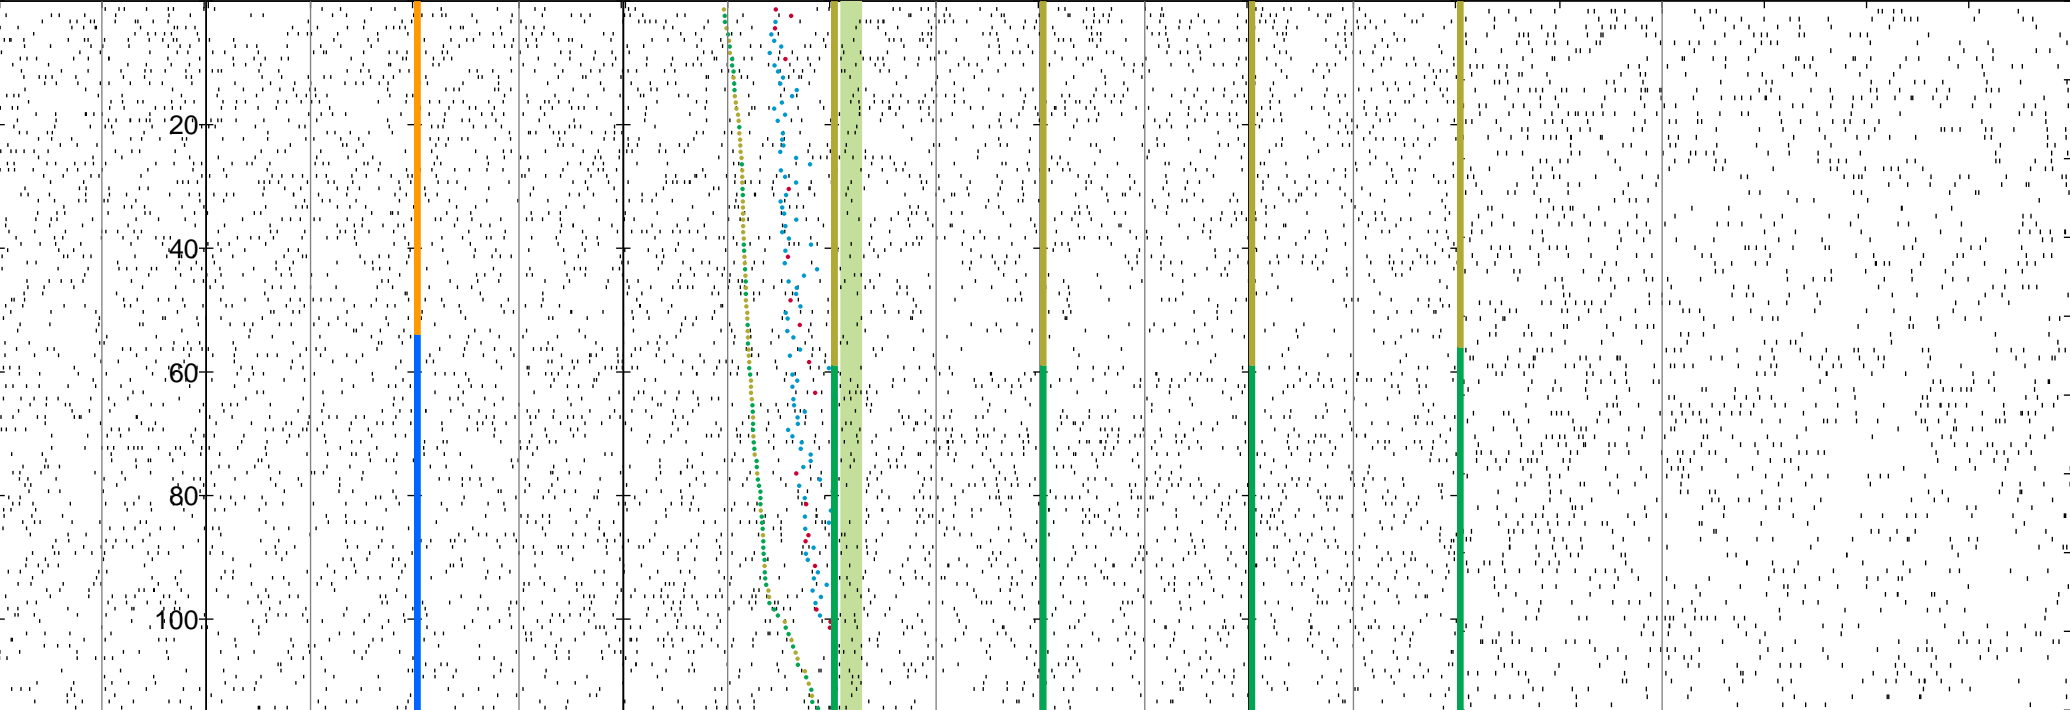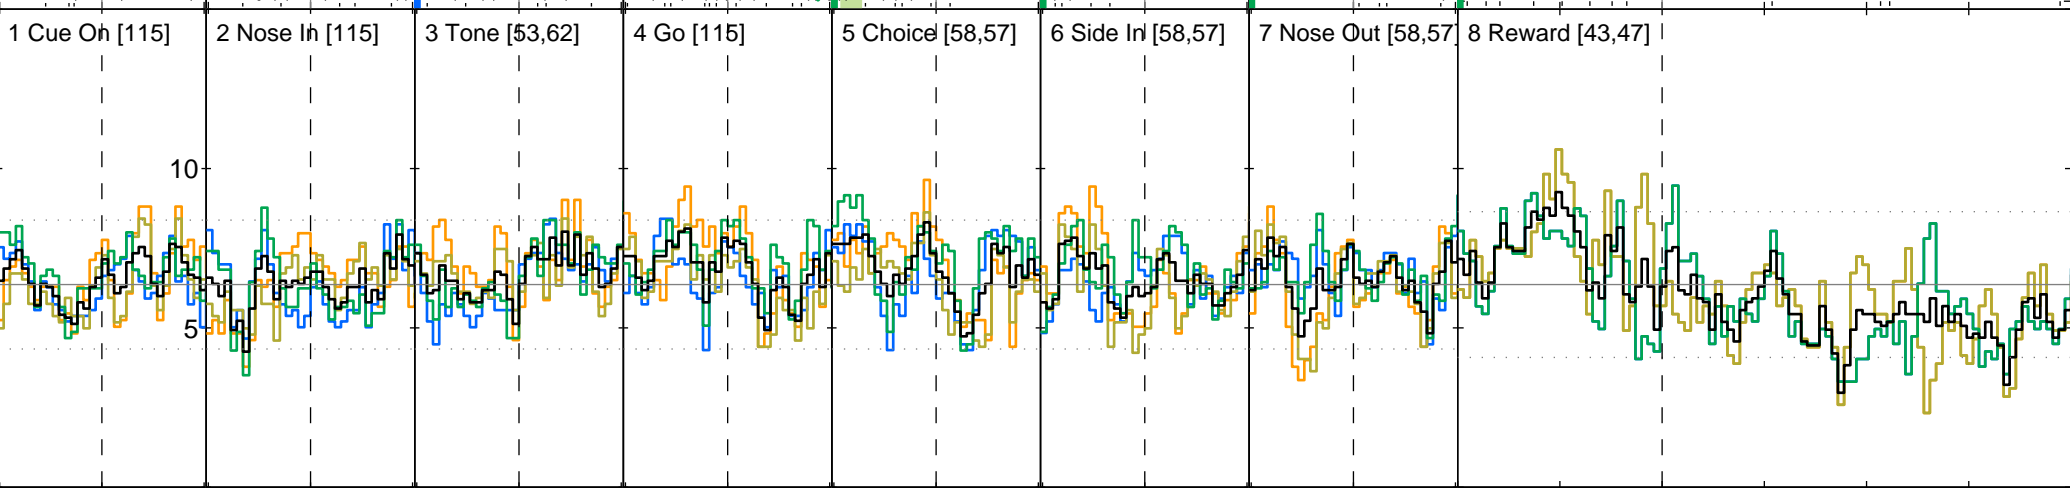

Cell: C1220071114T11a

AP: -2.8 ML: 4.2 DV: 7.2

w: 3 n: 383287 P<sub>ISI>2</sub>: 0

1/2pw: 117μs p->v: 155μs

β<sub>T</sub>: 3.5 β<sub>D</sub>: -5

β<sub>p</sub>: -7.5 SI: -0.4

Session FR: 62.8 Hz

Pk Ev: 8 - Reward (T2/Ipsi)

Pk FR: 115Hz (-0.34s) GP

HP/PV

FR/PV

ISI Histogram [37384]

10<sup>-2</sup> 10<sup>-1</sup> 10<sup>0</sup>

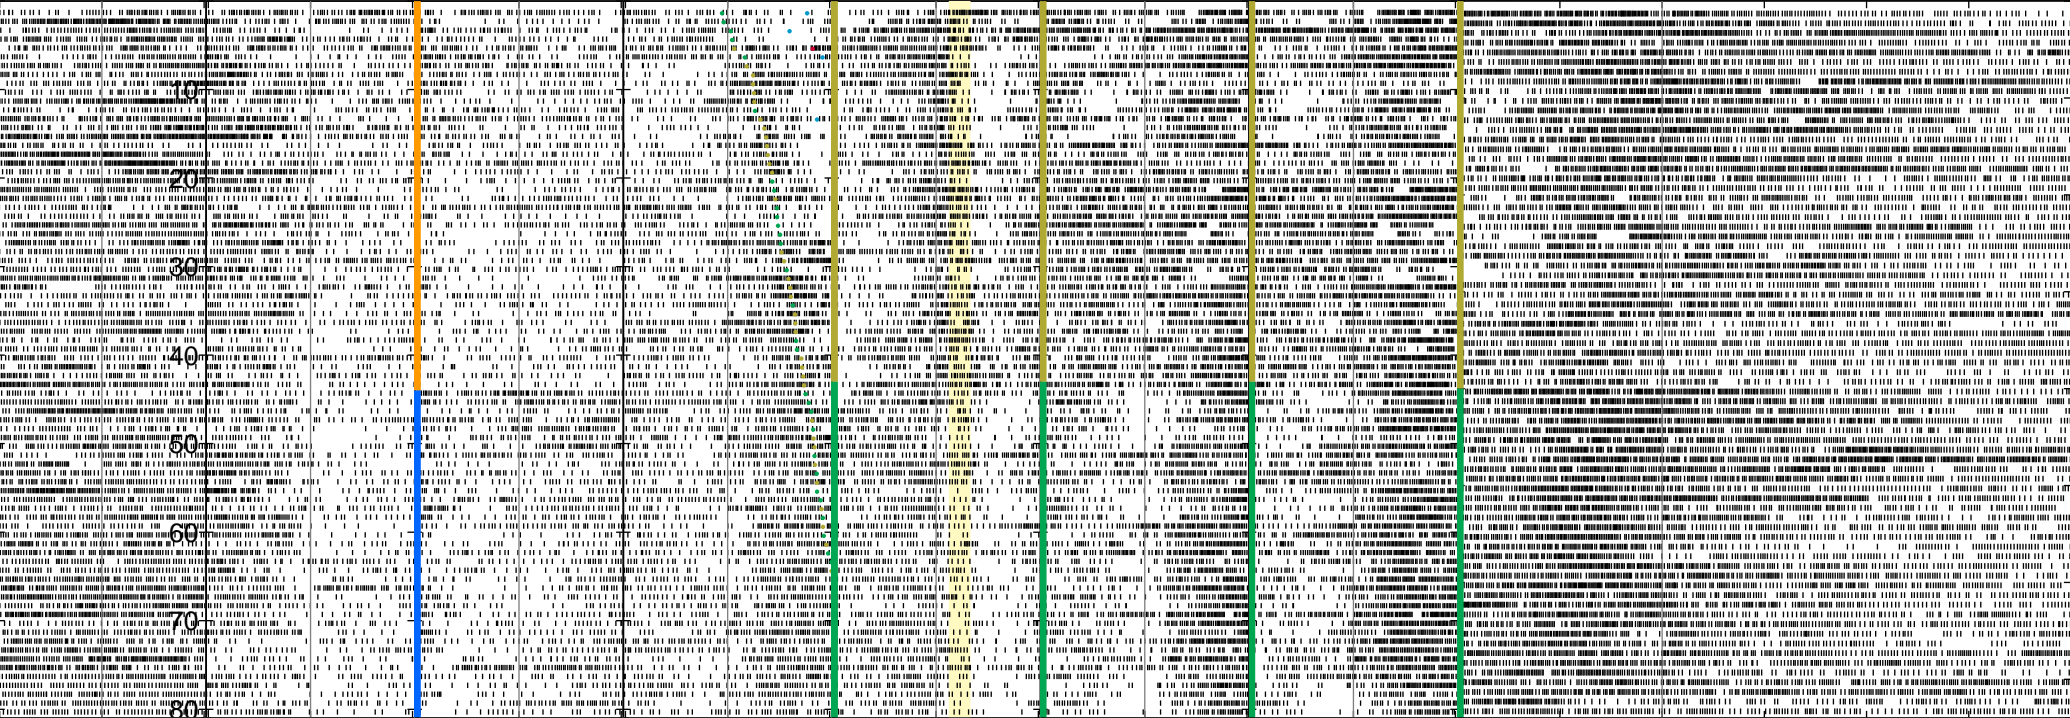

1 Cue On [80]    2 Nose In [80]    3 Tone [43,37]    4 Go [80]    5 Choice [42,38]    6 Side In [42,38]    7 Nose Out [42,38]    8 Reward [39,34]

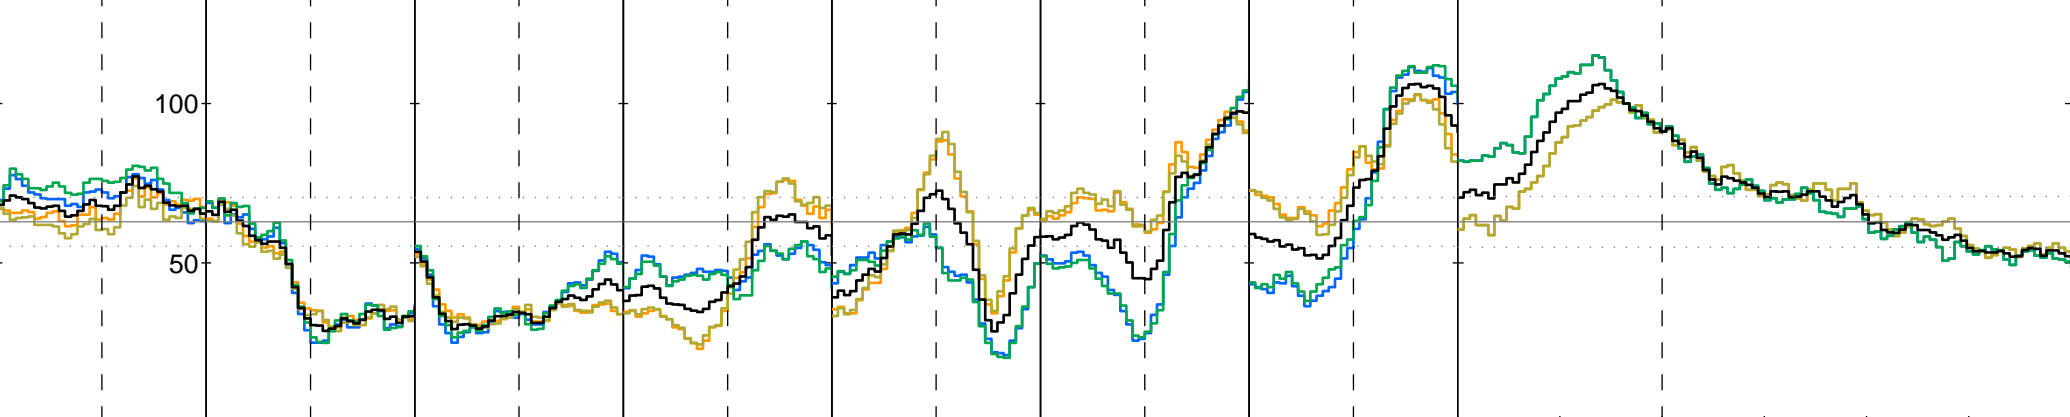

Cell: C1220071117T11b

AP: -2.8 ML: 4.2 DV: 7.4

w: 3 n: 14002  $P_{ISI>2}$ : 0.082

1/2pw: 117 $\mu$ s p->v: 349 $\mu$ s

$\beta_T$ : -1.8  $\beta_D$ : 2.1

$\beta_P$ : -3.1 SI: NaN

Session FR: 2.33 Hz

Pk Ev: 8 - Reward (T2/Ipsi)

Pk FR: 5.71Hz (-0.1s) GP

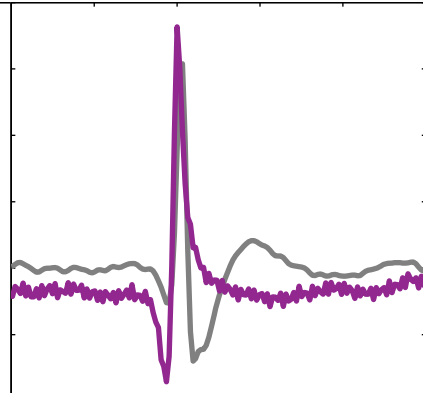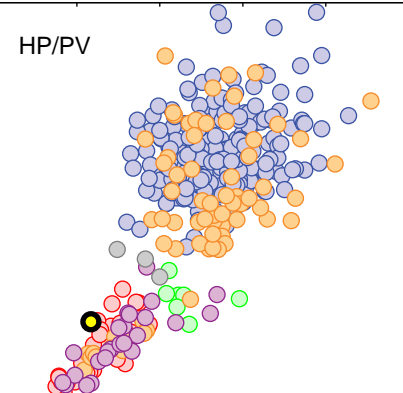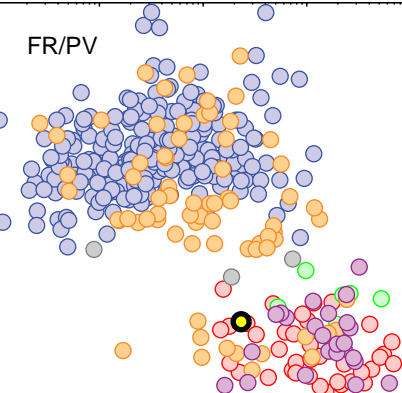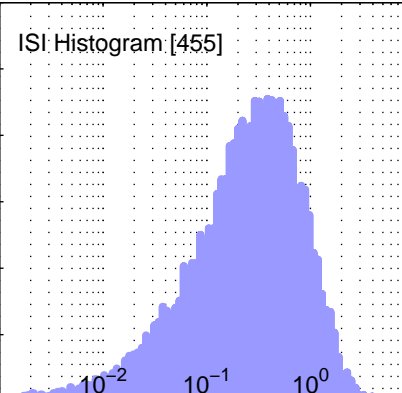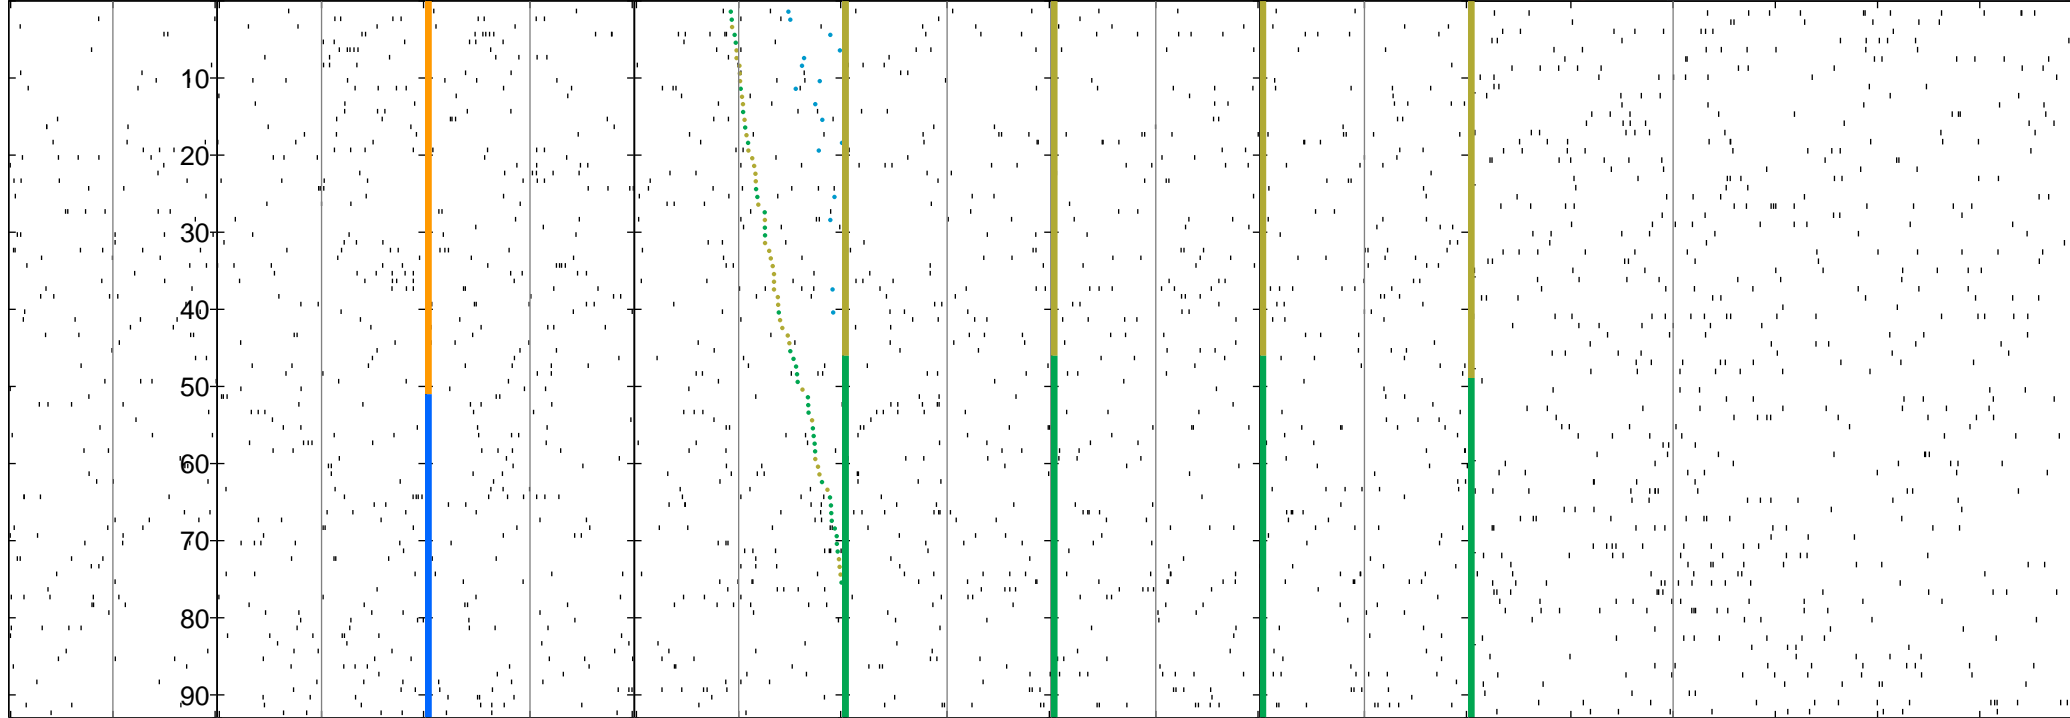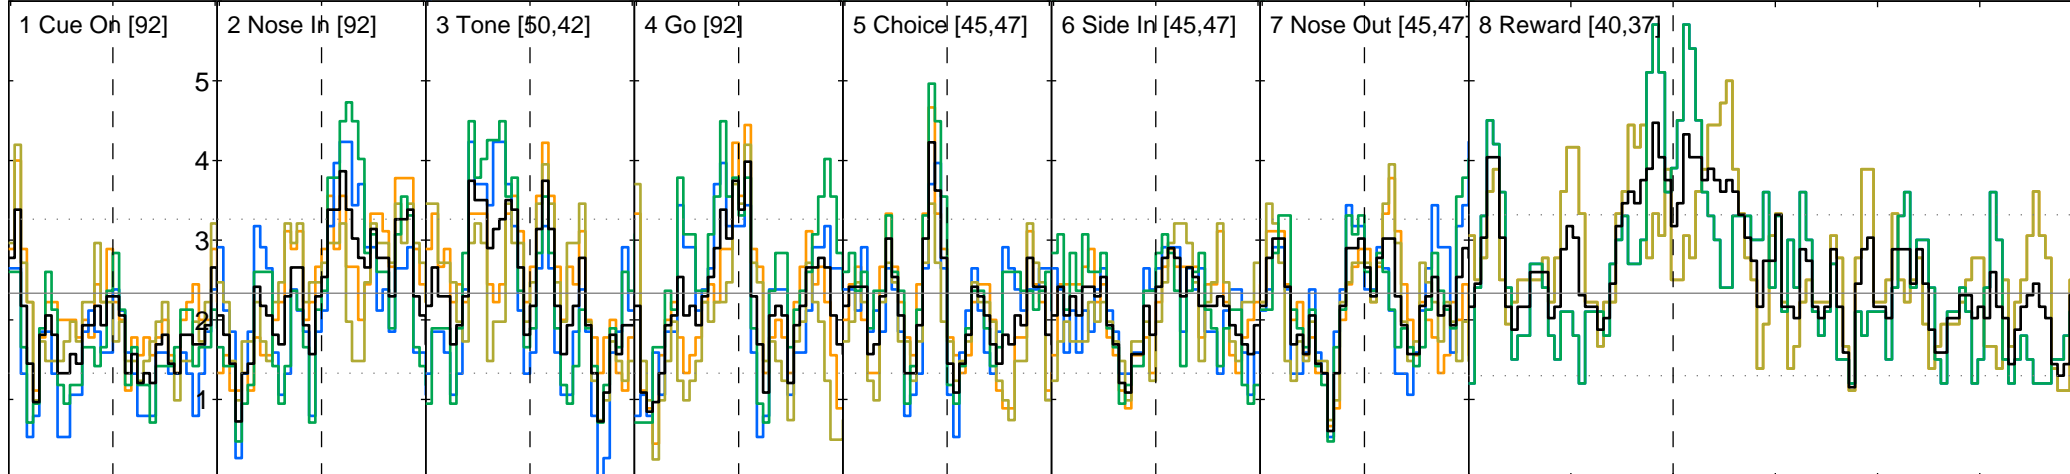

Cell: C1220071117T11a

AP: -2.8 ML: 4.2 DV: 7.4

w: 3 n: 117654  $P_{ISI>2}$ : 0.0003

1/2pw: 96 $\mu$ s p $\rightarrow$ v: 251 $\mu$ s

$\beta_T$ : -3.4  $\beta_D$ : -7.8

$\beta_P$ : -3.6 SI: -0.32

Session FR: 19.6 Hz

Pk Ev: 8 - Reward (T2/Ipsi)

Pk FR: 83.5Hz (0.05s) GP

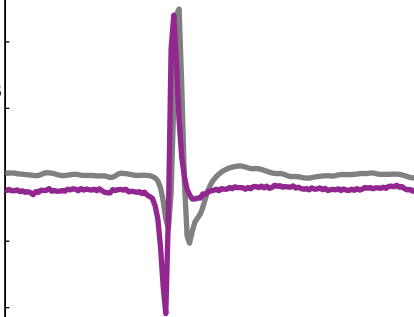

HP/PV

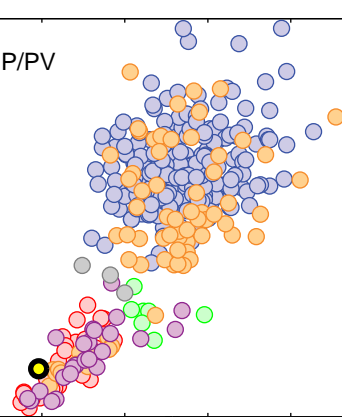

FR/PV

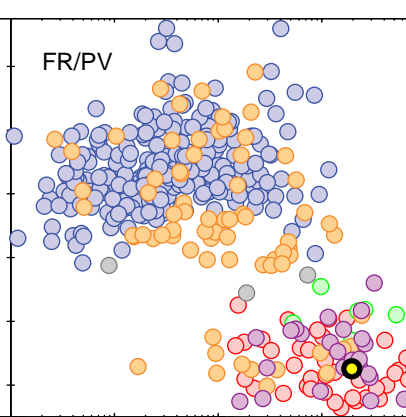

ISI Histogram [5233]

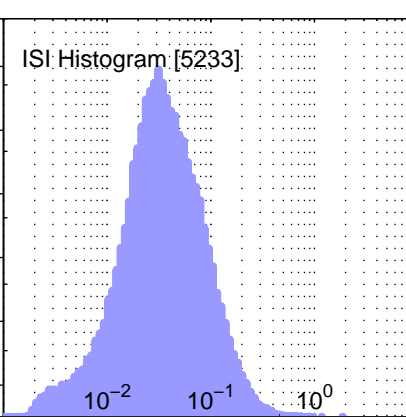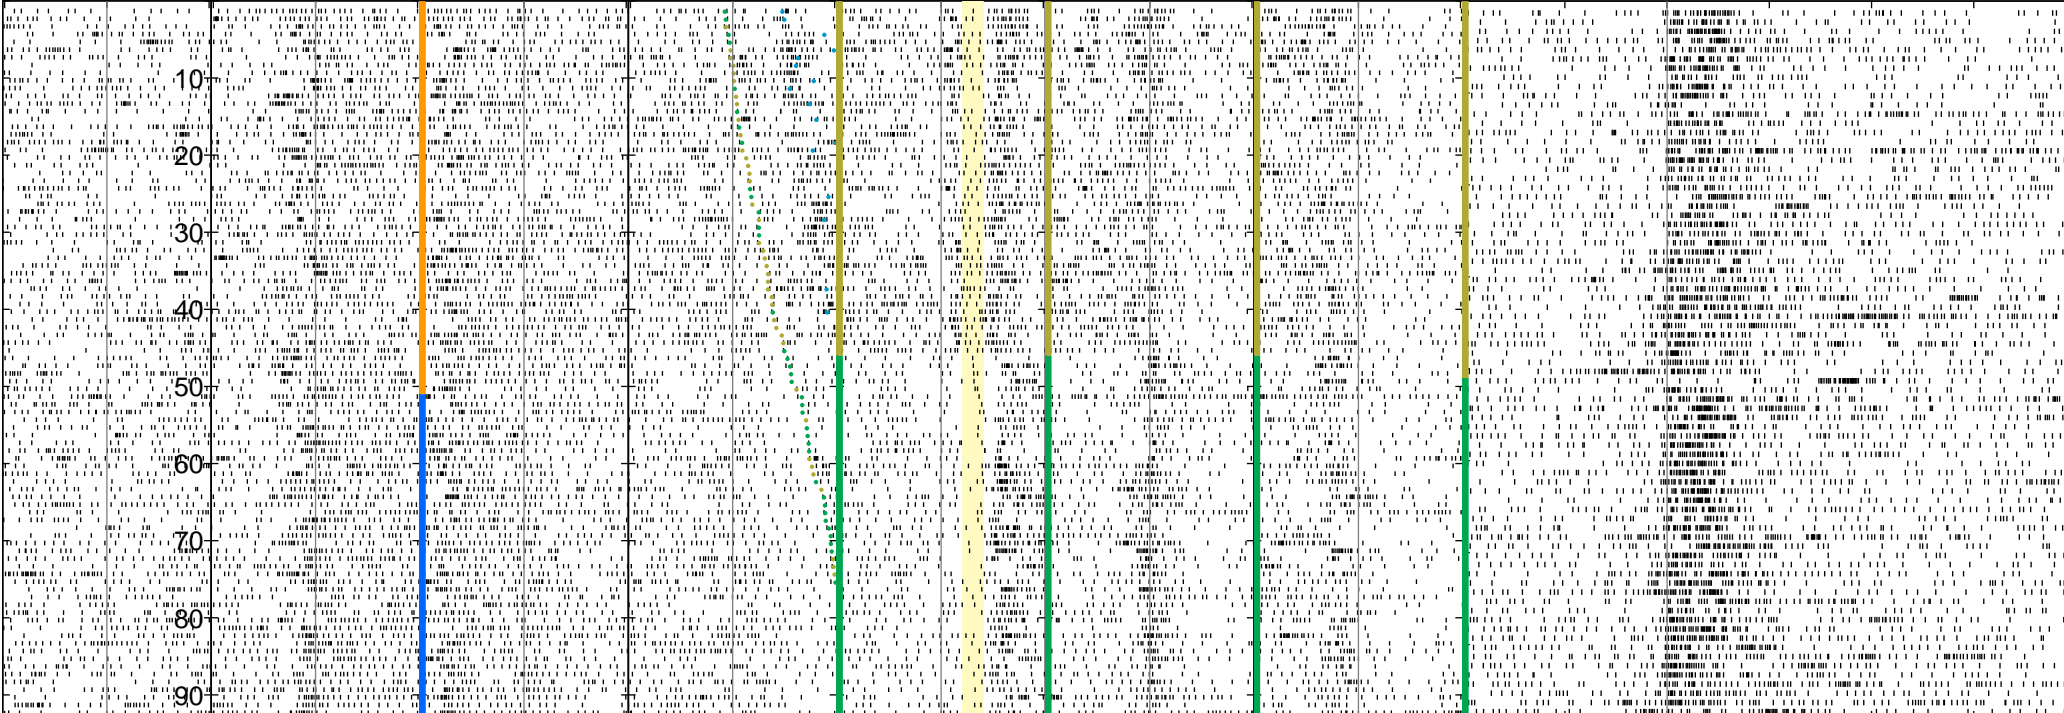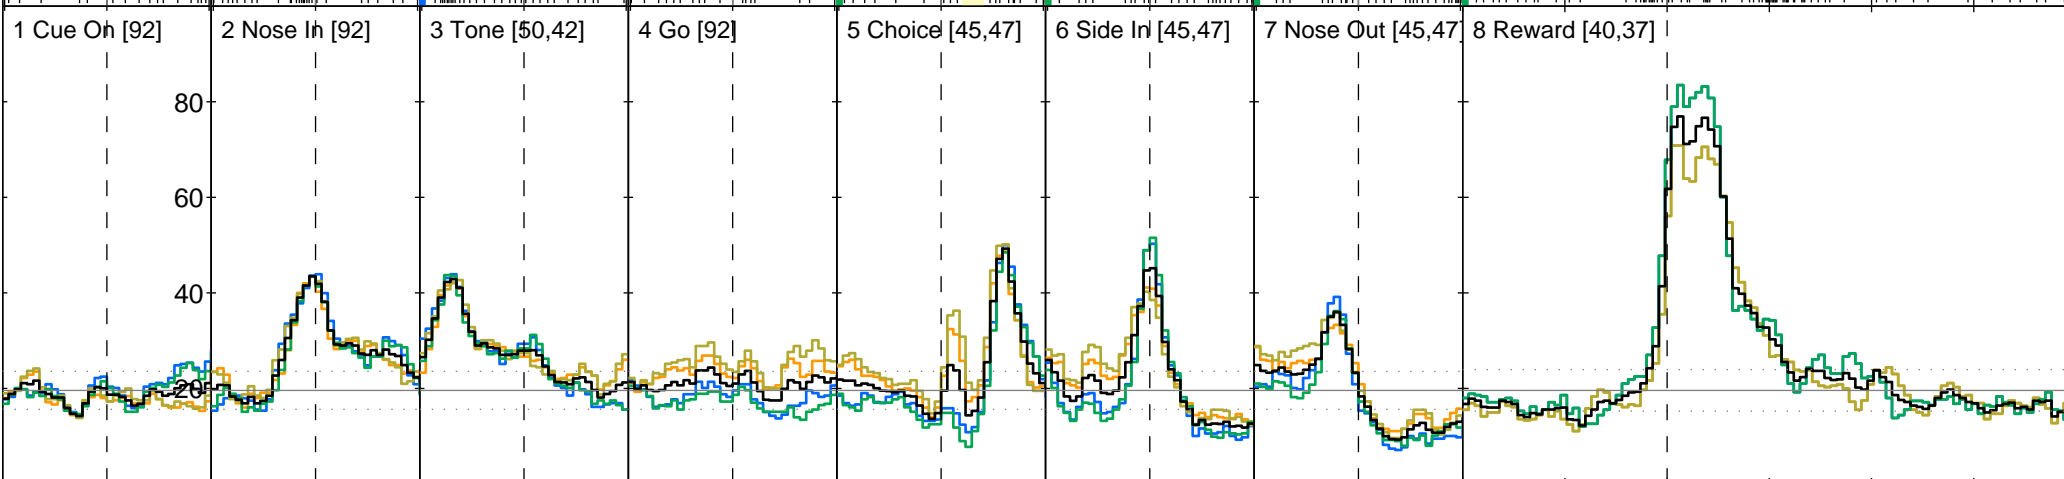

Cell: C0320070623T15a

AP: -2.3 ML: 4.6 DV: 7.1

w: 3 n: 74788  $P_{ISI>2}$ : 0.0011

1/2pw: 152 $\mu$ s p->v: 278 $\mu$ s

$\beta_T$ : -3.6  $\beta_D$ : 9.6

$\beta_P$ : -4.4 SI: 0.94

Session FR: 19.7 Hz

Pk Ev: 8 - Reward (T2/Ipsi)

Pk FR: 53.9Hz (0.11s) GP

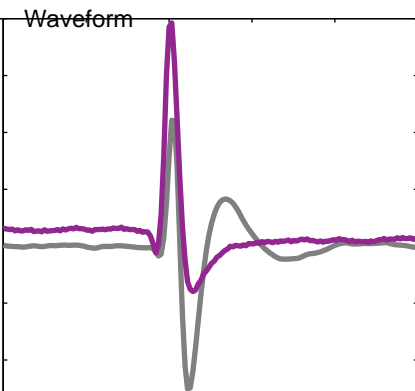

HP/PV

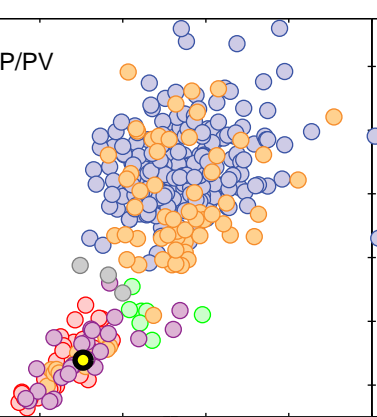

FR/PV

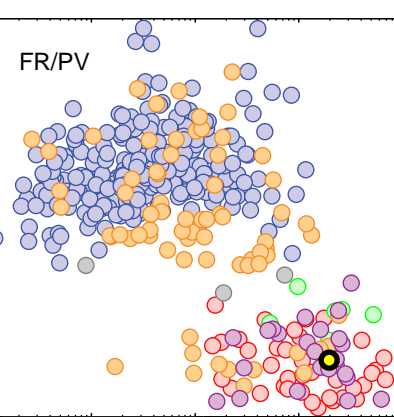

ISI Histogram [3406]

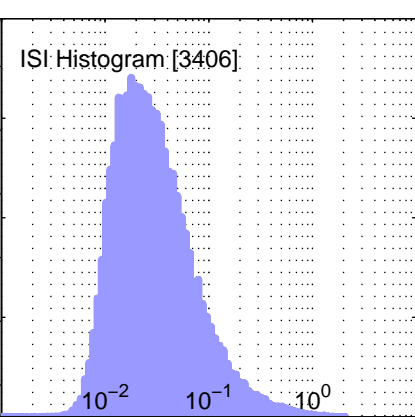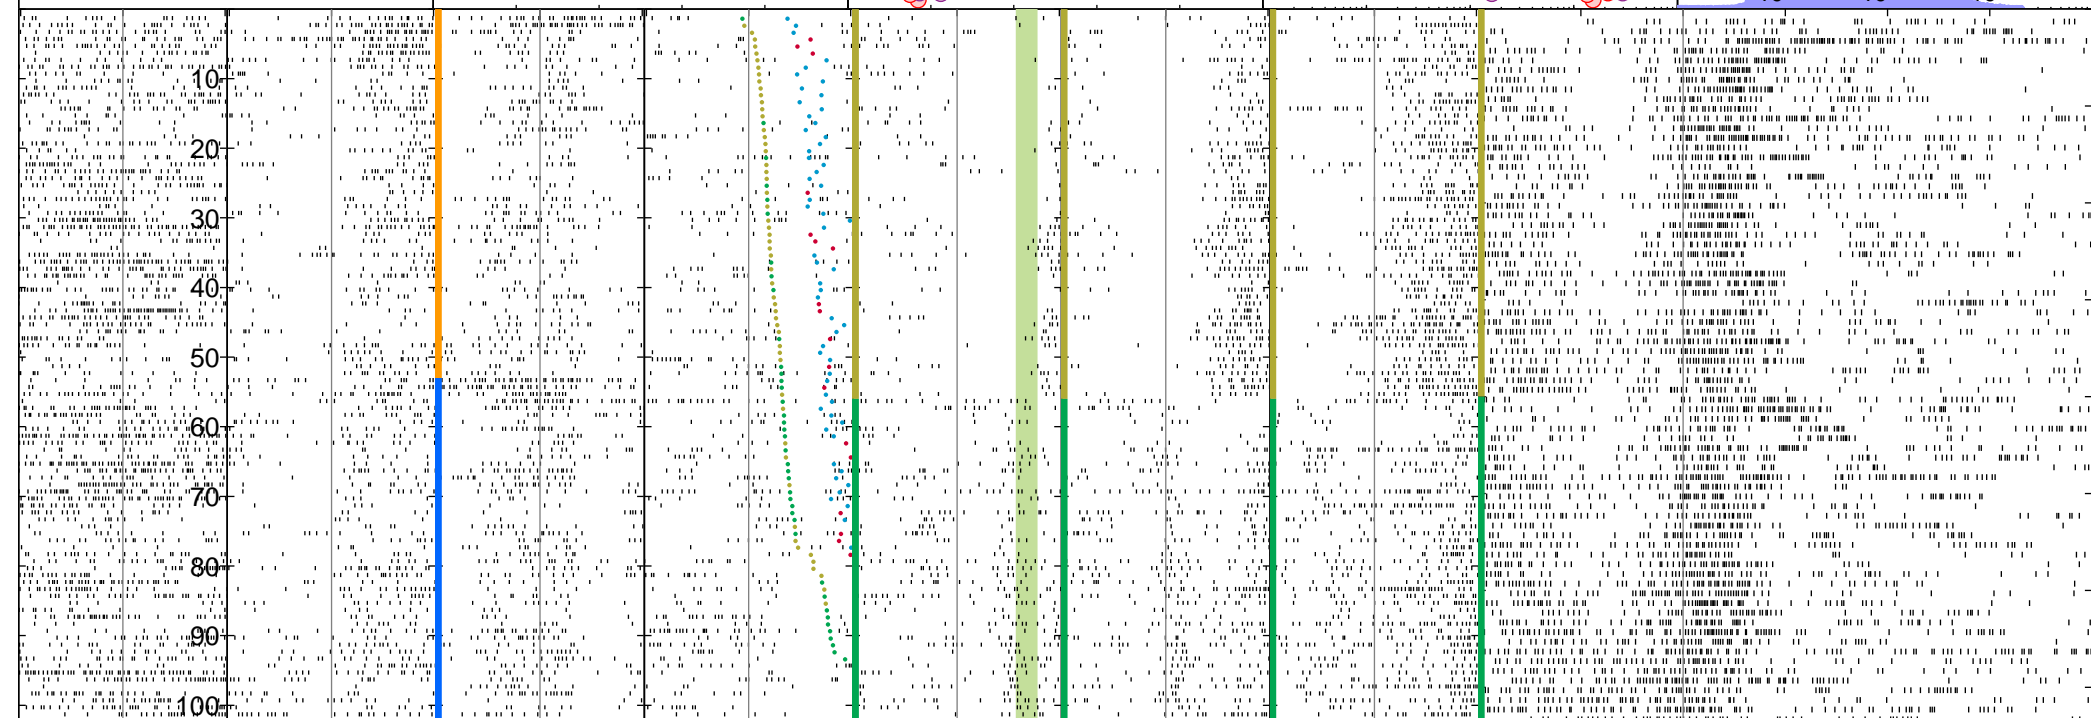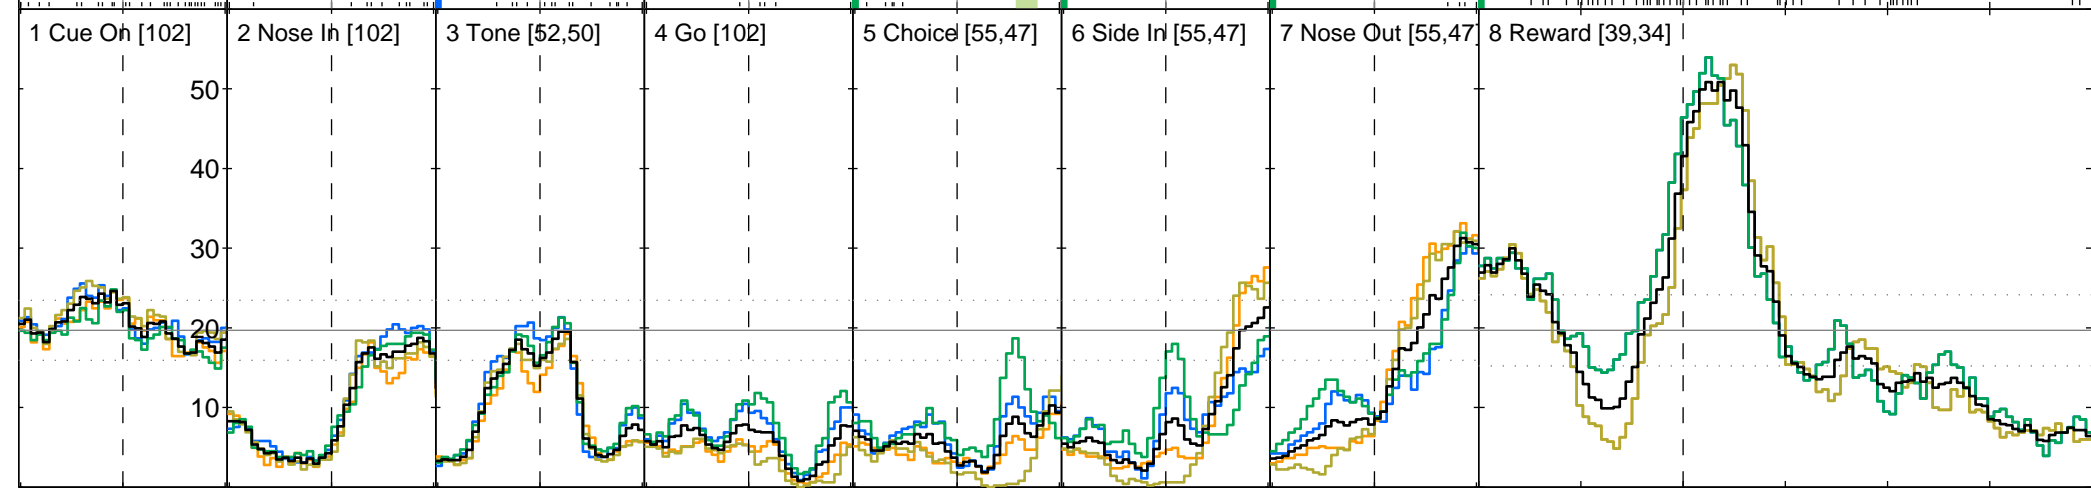

Cell: C0520070417R03b

AP: -2.5 ML: 4.1 DV: 6.2

w: 1 n: 31680  $P_{ISI>2}$ : 0.021

1/2pw: 98 $\mu$ s p->v: 181 $\mu$ s

$\beta_T$ : 3.8  $\beta_D$ : -4.1

$\beta_P$ : 4.5 SI: -0.51

Session FR: 9.72 Hz

Pk Ev: 8 - Reward (T2/Ipsi)

Pk FR: 22.5Hz (0.2s) GP

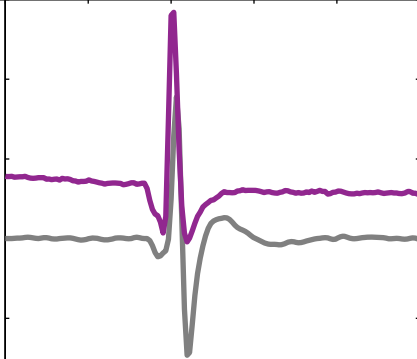

HP/PV

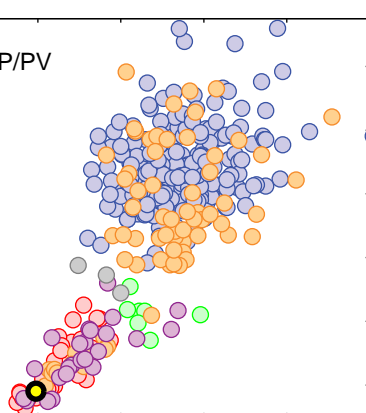

FR/PV

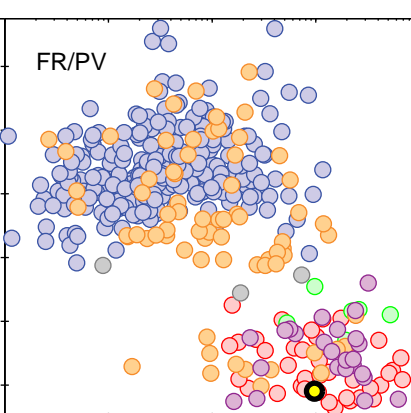

ISI Histogram [710]

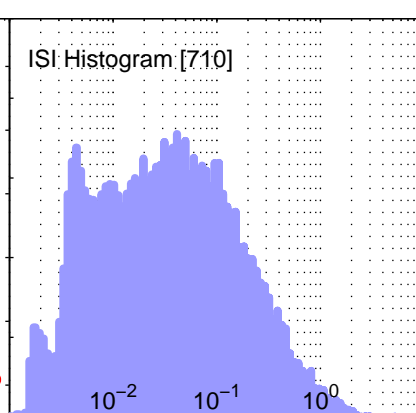

10<sup>-2</sup> 10<sup>-1</sup> 10<sup>0</sup>

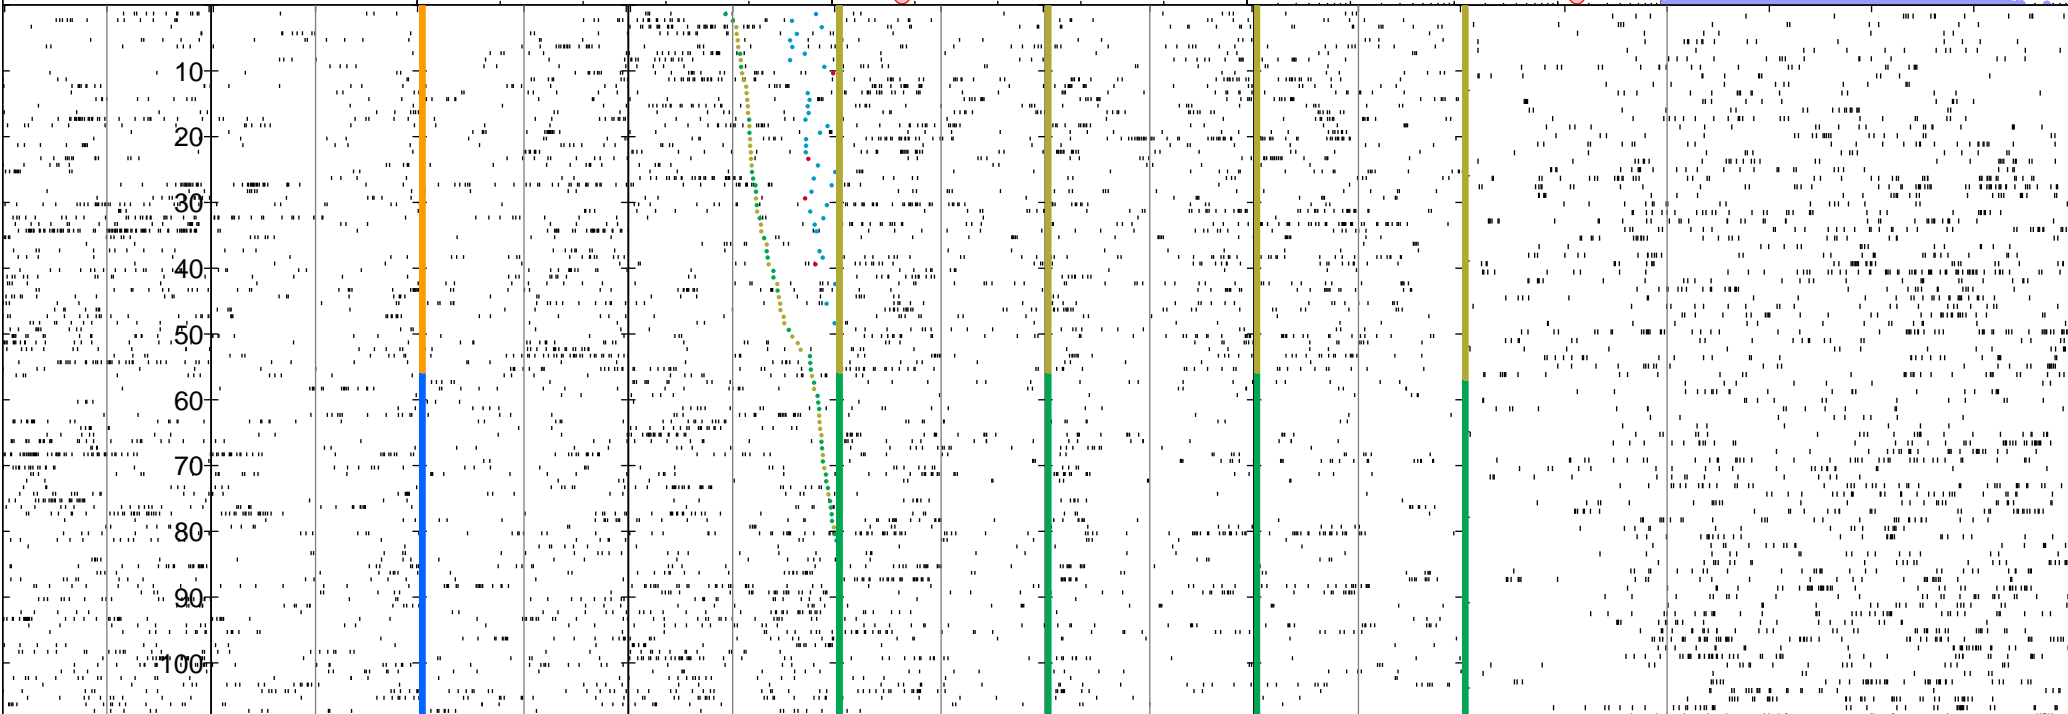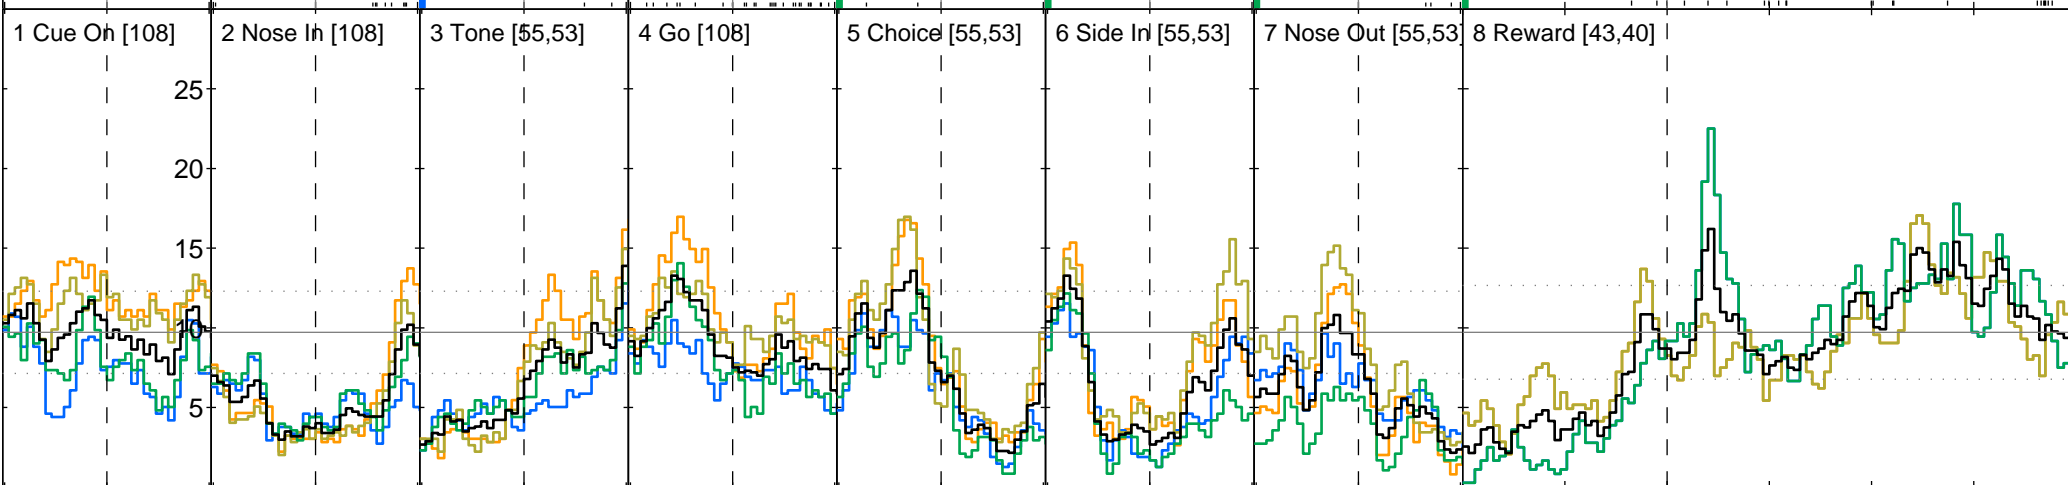

1 Cue On [108]

2 Nose In [108]

3 Tone [55,53]

4 Go [108]

5 Choice [55,53]

6 Side In [55,53]

7 Nose Out [55,53]

8 Reward [43,40]



**Cell: C0320070623T15c**

AP: -2.3 ML: 4.6 DV: 7.1

w: 4 n: 21411  $P_{ISI>2}$ : 0.00471/2pw: 162 $\mu$ s p $\rightarrow$ v: 376 $\mu$ s $\beta_T$ : -2.2  $\beta_D$ : -2.5 $\beta_P$ : 3.6 SI: -0.49

Session FR: 5.63 Hz

Pk Ev: 8 - Reward (T2/Ipsi)

Pk FR: 17.3Hz (0.23s) **GP**

Waveform

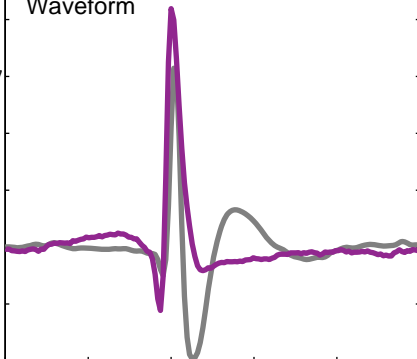

HP/PV

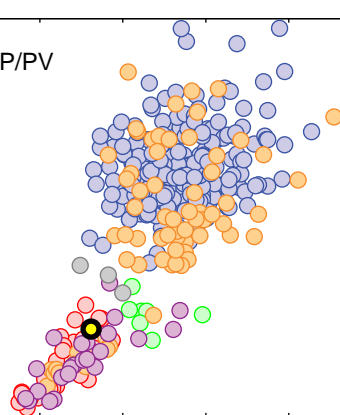

FR/PV

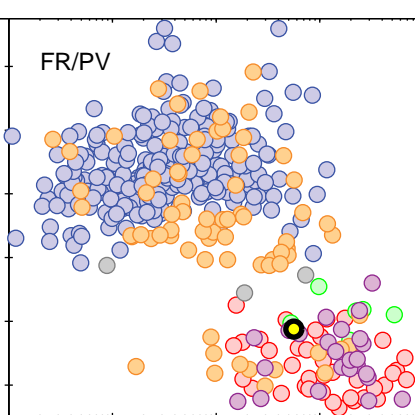

ISI Histogram [776]

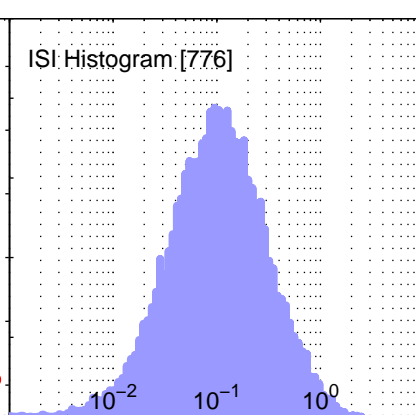10  
20  
30  
40  
50  
60  
70  
80  
90  
100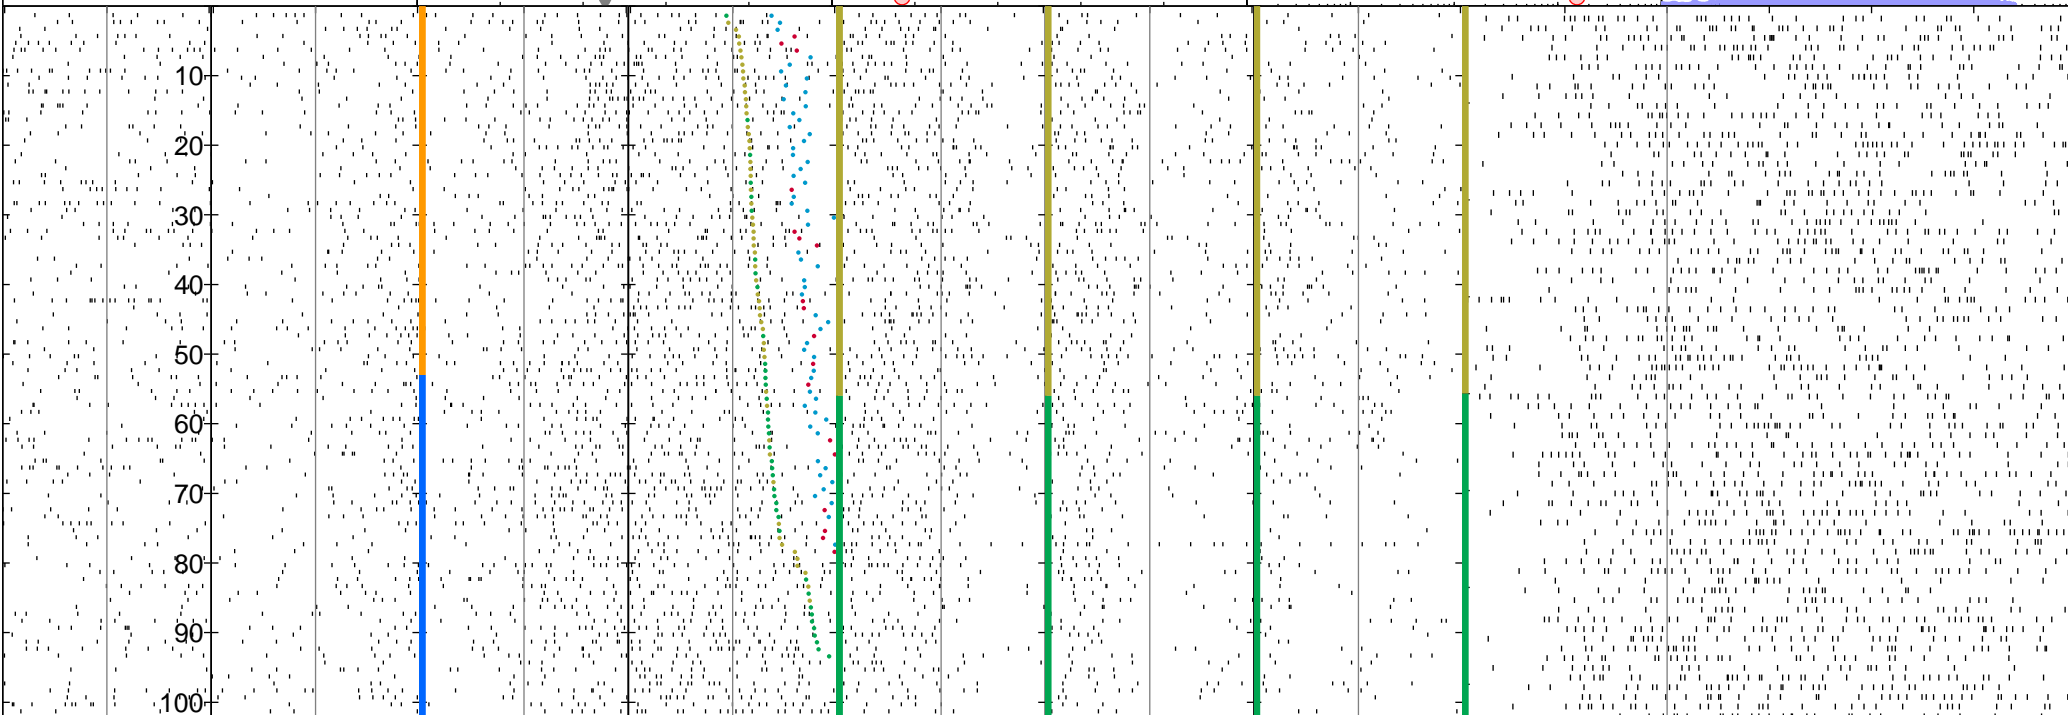

1 Cue On [102]

2 Nose In [102]

3 Tone [52,50]

4 Go [102]

5 Choice [55,47]

6 Side In [55,47]

7 Nose Out [55,47]

8 Reward [39,34]

15  
10  
5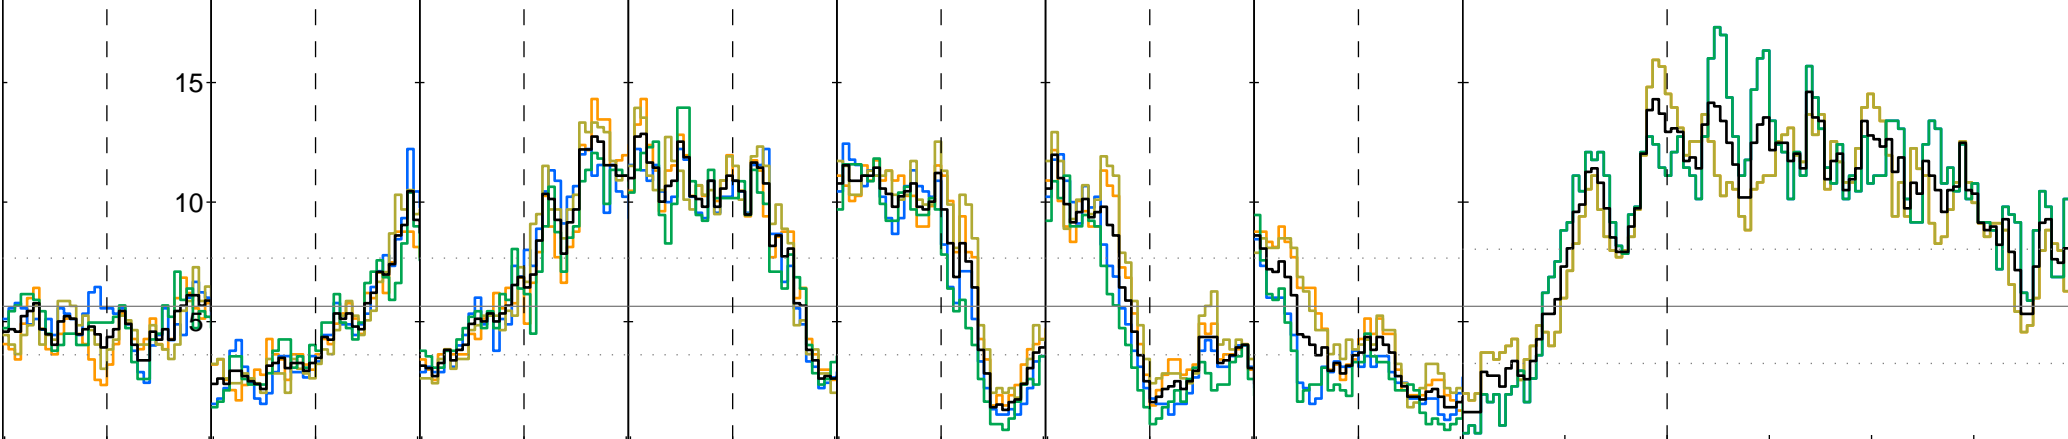

Cell: C1220071121T11a

AP: -2.8 ML: 4.2 DV: 7.6

w: 1 n: 139522  $P_{ISI>2}$ : 0

1/2pw: 157 $\mu$ s p->v: 282 $\mu$ s

$\beta_T$ : -2.4  $\beta_D$ : 2.1

$\beta_P$ : -3.8 SI: -0.2

Session FR: 23 Hz

Pk Ev: 8 - Reward (T2/Ipsi)

Pk FR: 33.6Hz (0.35s) GP

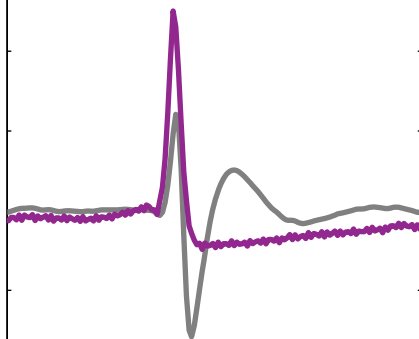

HP/PV

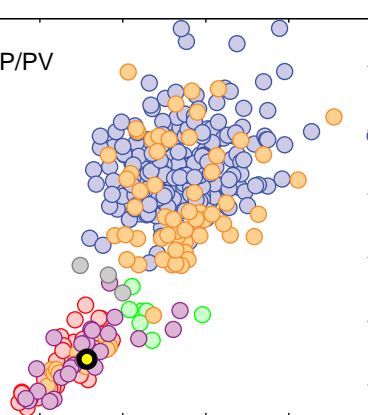

FR/PV

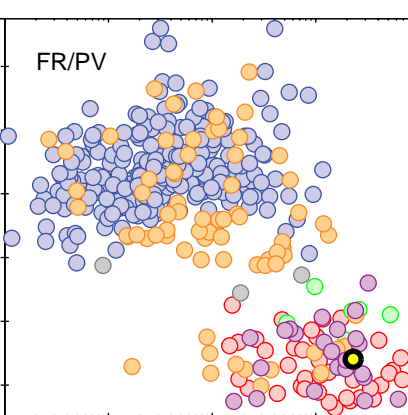

ISI Histogram [8903]

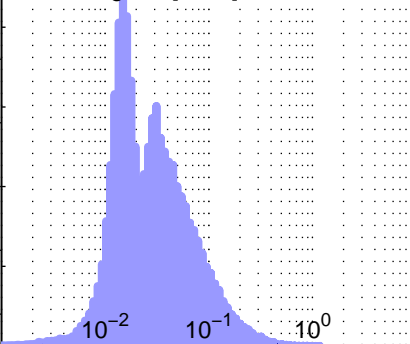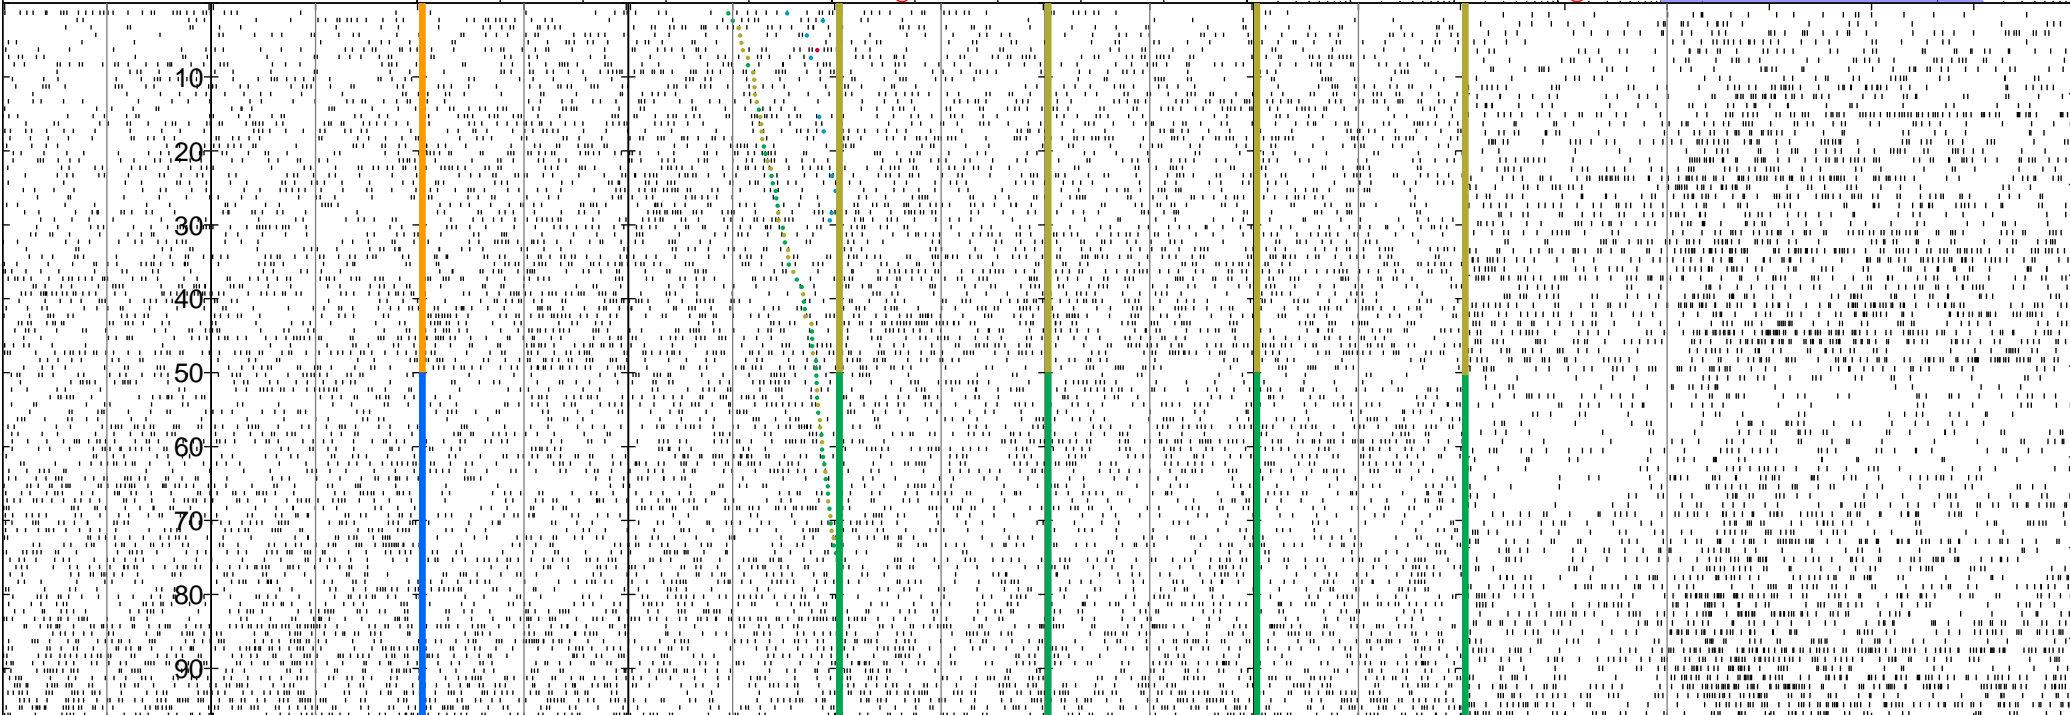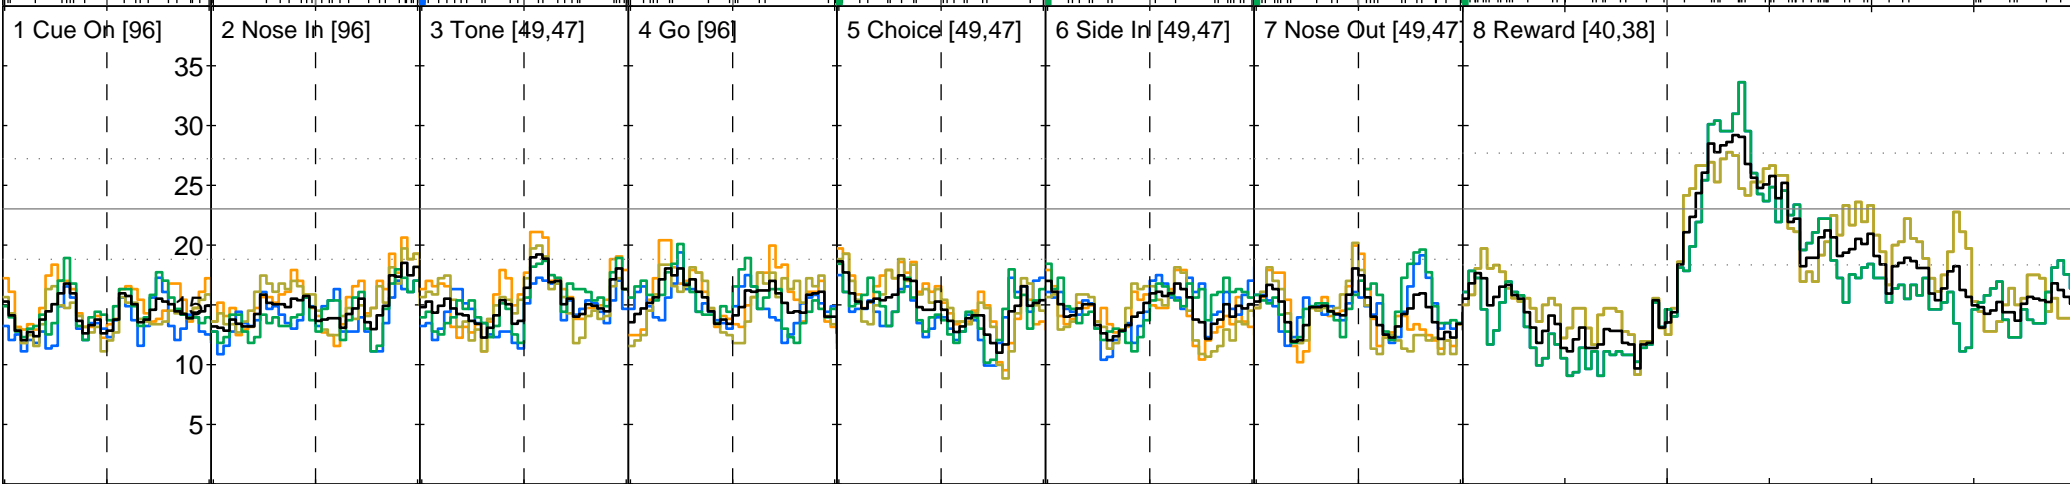



**Cell: C0520070416R03a**

AP: -2.5 ML: 4.1 DV: 6.2

w: 1 n: 22367  $P_{ISI>2}$ : 0.0991/2pw: 163 $\mu$ s p $\rightarrow$ v: 372 $\mu$ s $\beta_T$ : 2.7  $\beta_D$ : -6.1 $\beta_P$ : 4 SI: -1

Session FR: 5.04 Hz

Pk Ev: 8 - Reward (T2/Ipsi)

Pk FR: 13.6Hz (0.8s) GP

Waveform

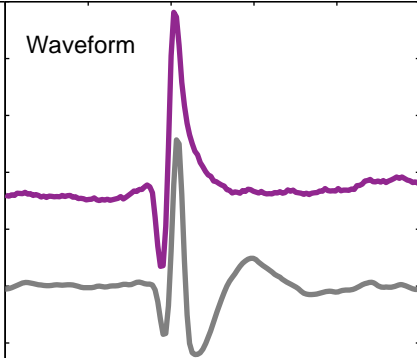

HP/PV

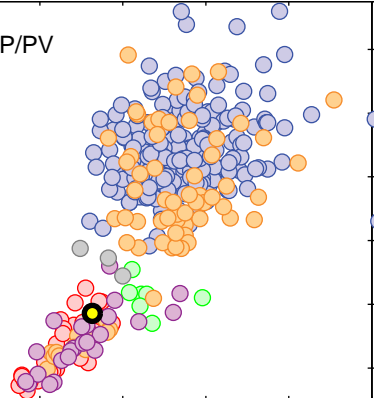

FR/PV

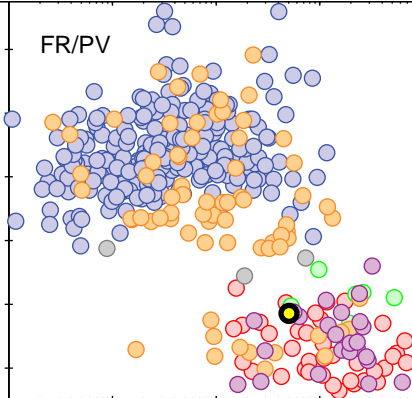

ISI Histogram [646]

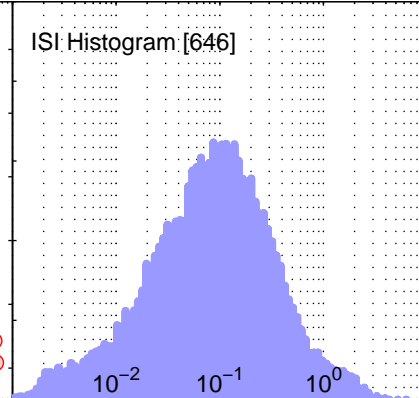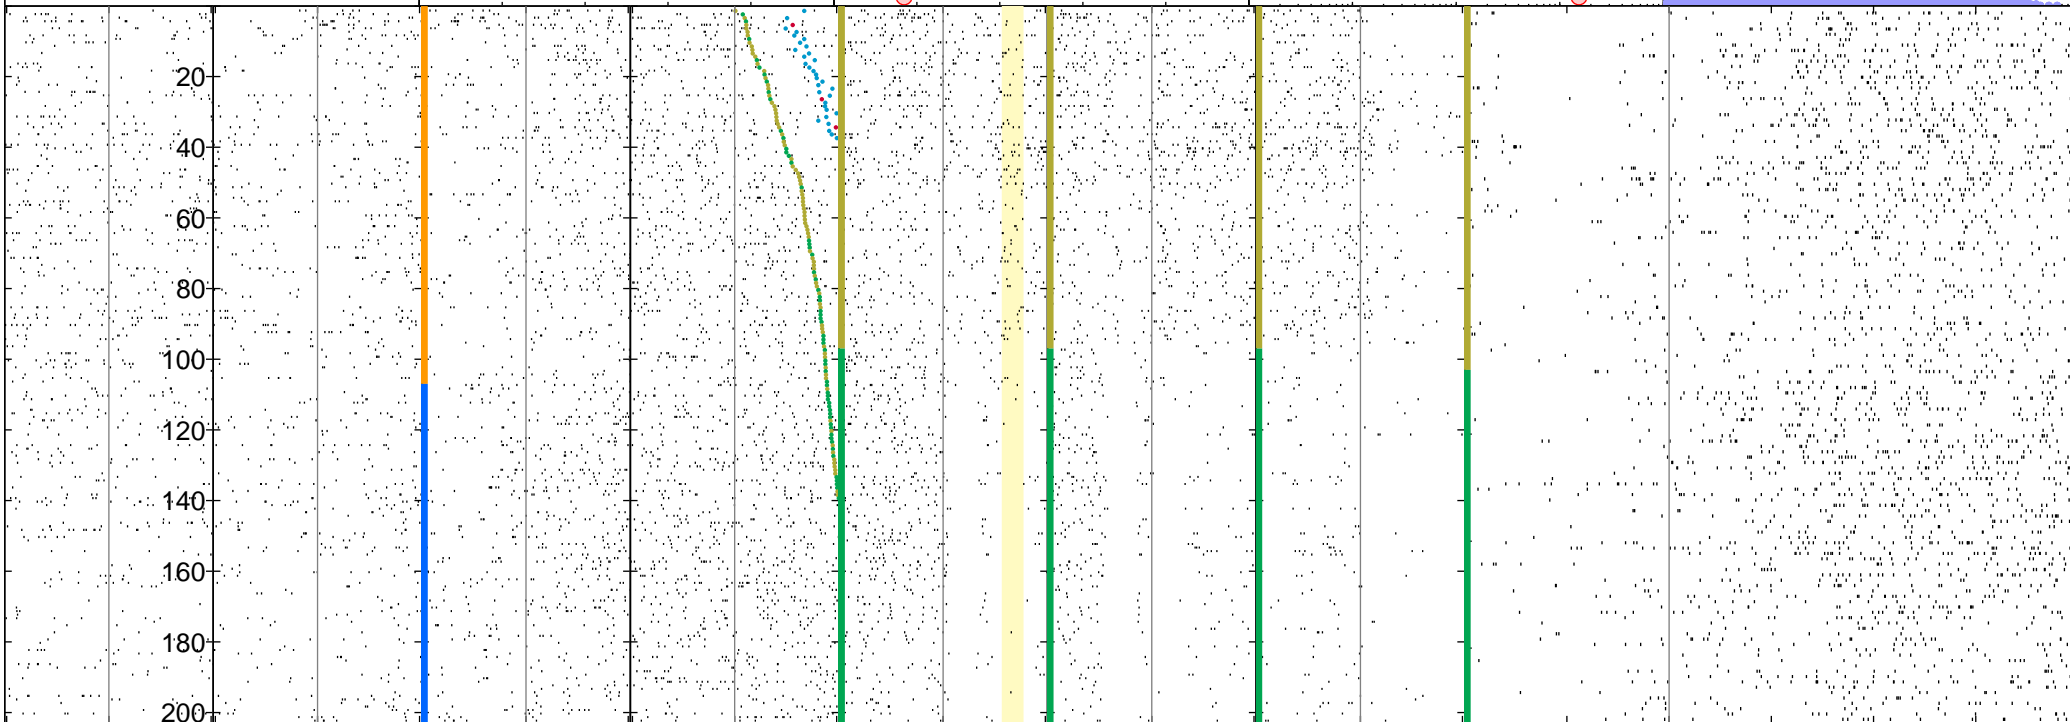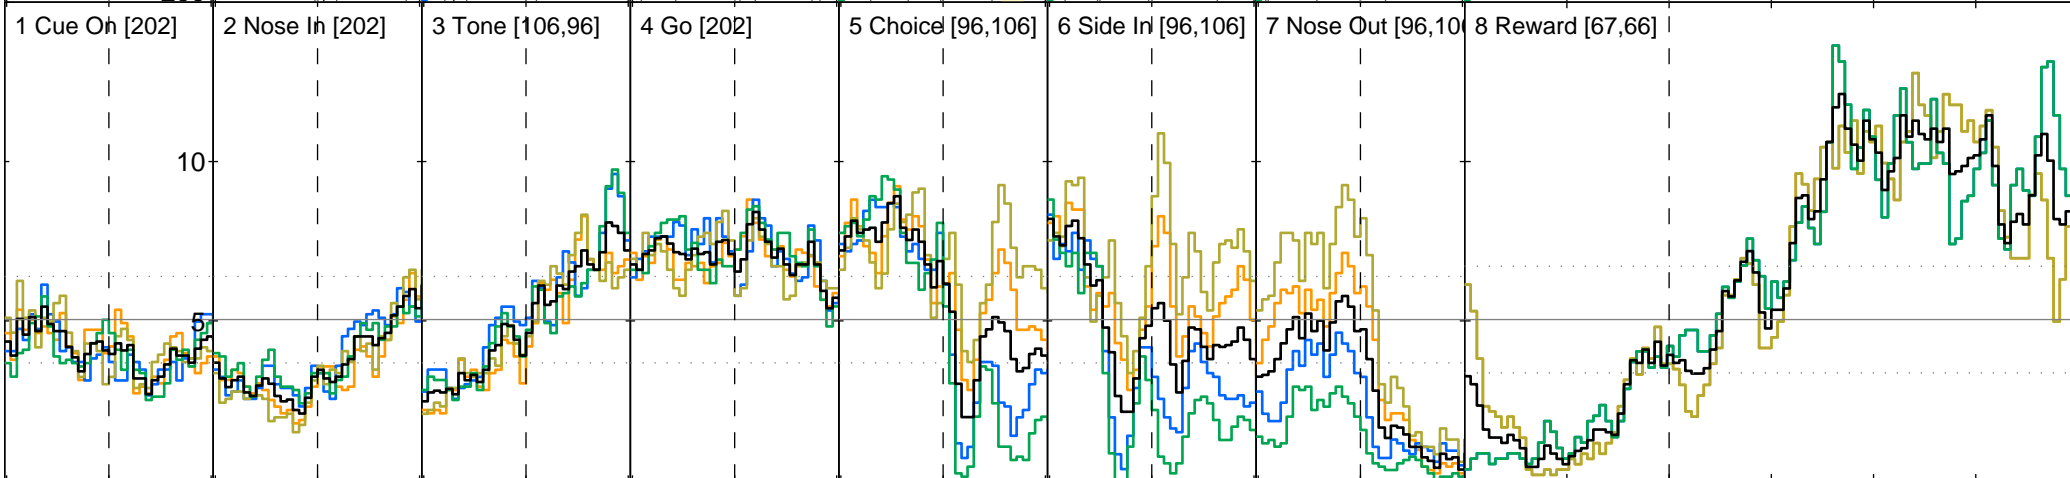

**Cell: C0520070406R03b**

AP: -2.5 ML: 4.1 DV: 5.6

w: 1 n: 11792  $P_{ISI>2}$ : 0.171/2pw: 83 $\mu$ s p $\rightarrow$ v: 158 $\mu$ s $\beta_T$ : -2.4  $\beta_D$ : -3.2 $\beta_P$ : 2.9 SI: NaN

Session FR: 2.71 Hz

Pk Ev: 8 - Reward (T1/Con)

Pk FR: 8.02Hz (1.04s) GP

Waveform

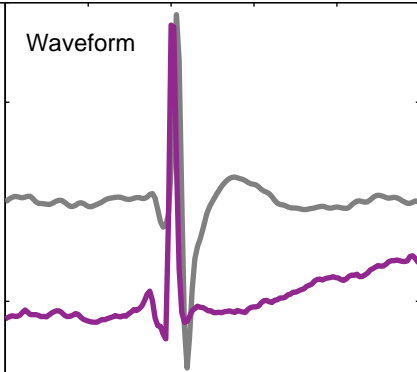

HP/PV

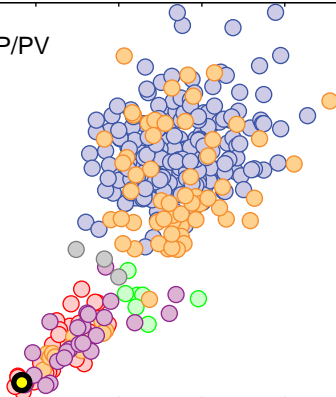

FR/PV

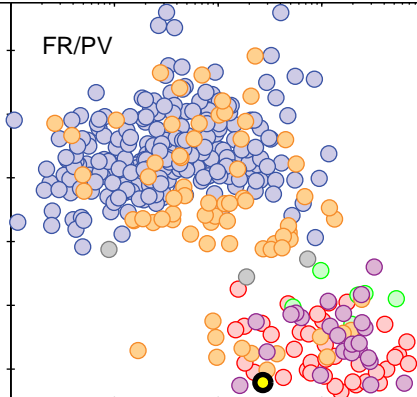

ISI Histogram [397]

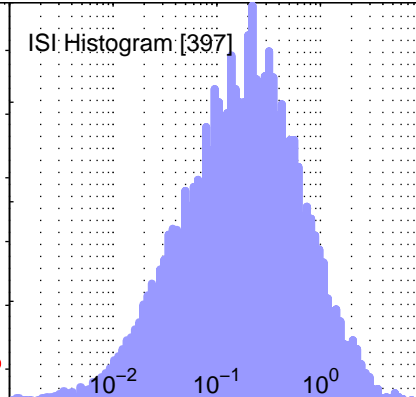

50

100

150

1 Cue On [151]

2 Nose In [151]

3 Tone [67,84]

4 Go [151]

5 Choice [75,76]

6 Side In [75,76]

7 Nose Out [75,76]

8 Reward [54,62]

8

6

4

2

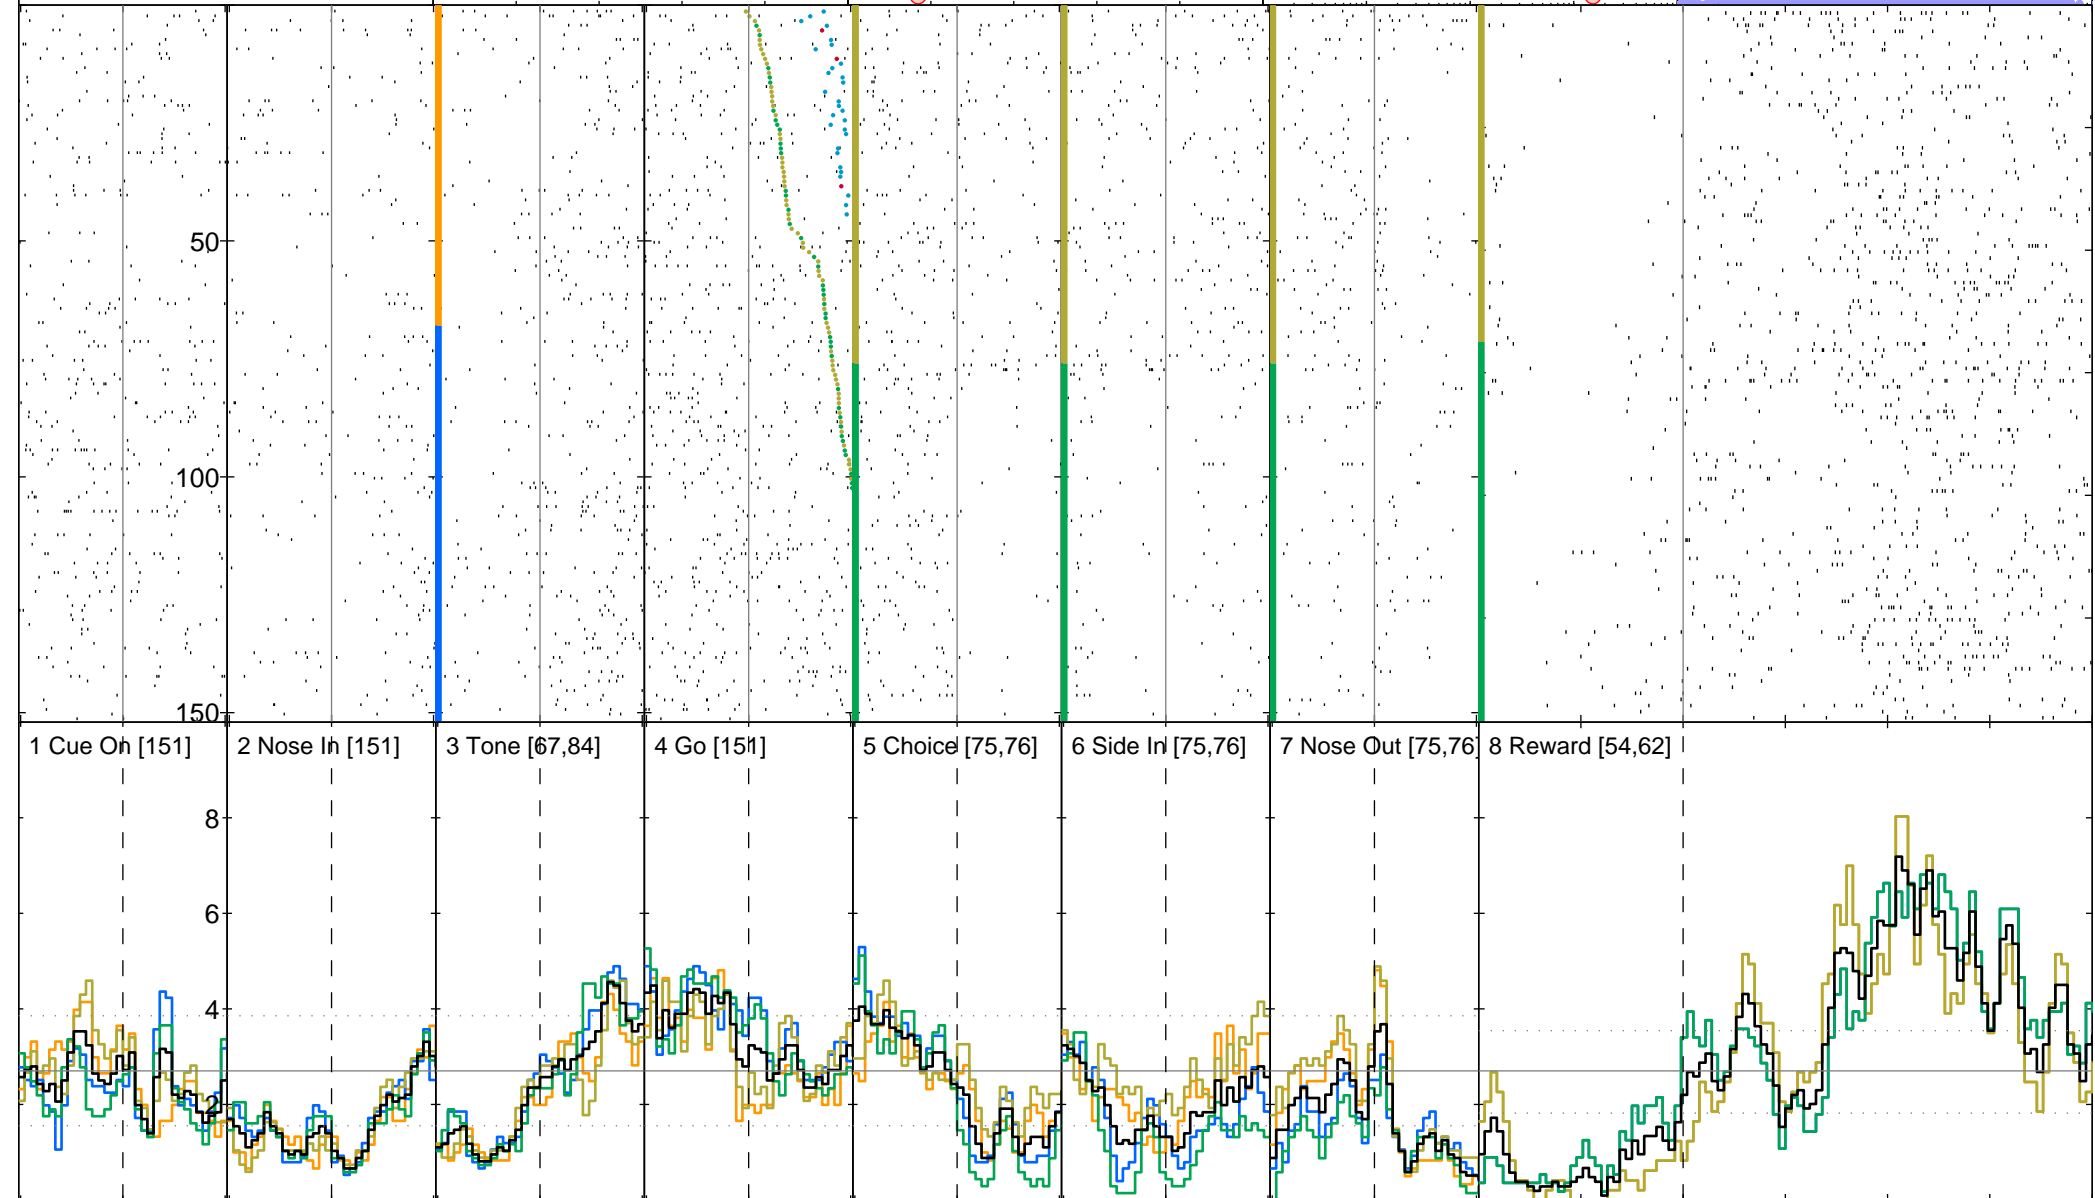

**Cell: C0520070405R03a**

AP: -2.5 ML: 4.1 DV: 5.5  
w: 2 n: 7168  $P_{ISI>2}$ : 0.19  
1/2pw: 112 $\mu$ s p->v: 149 $\mu$ s  
 $\beta_T$ : 2.9  $\beta_D$ : 1.9  
 $\beta_P$ : 3.2 SI: NaN  
Session FR: 1.63 Hz  
Pk Ev: None  
Pk FR: --

GP

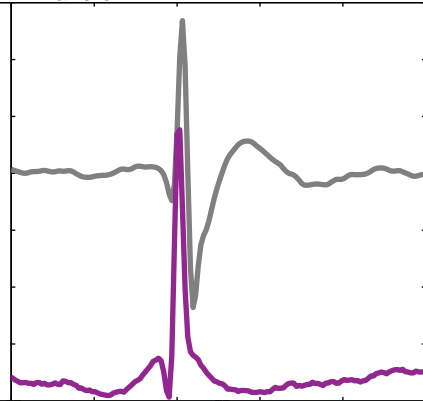

HP/PV

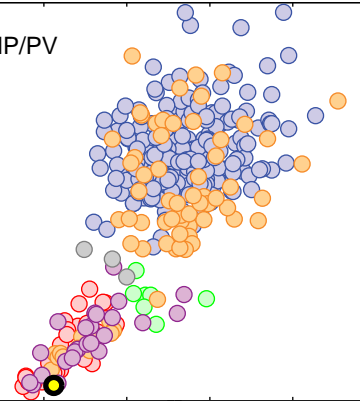

FR/PV

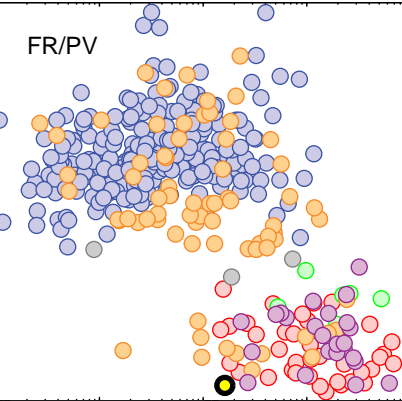

ISI Histogram [264]

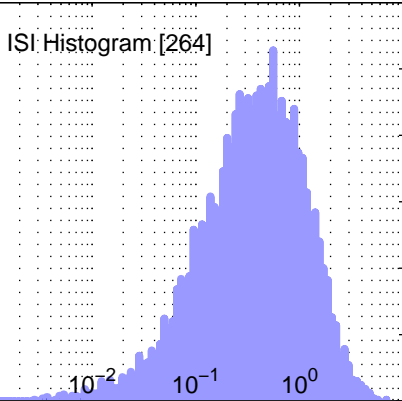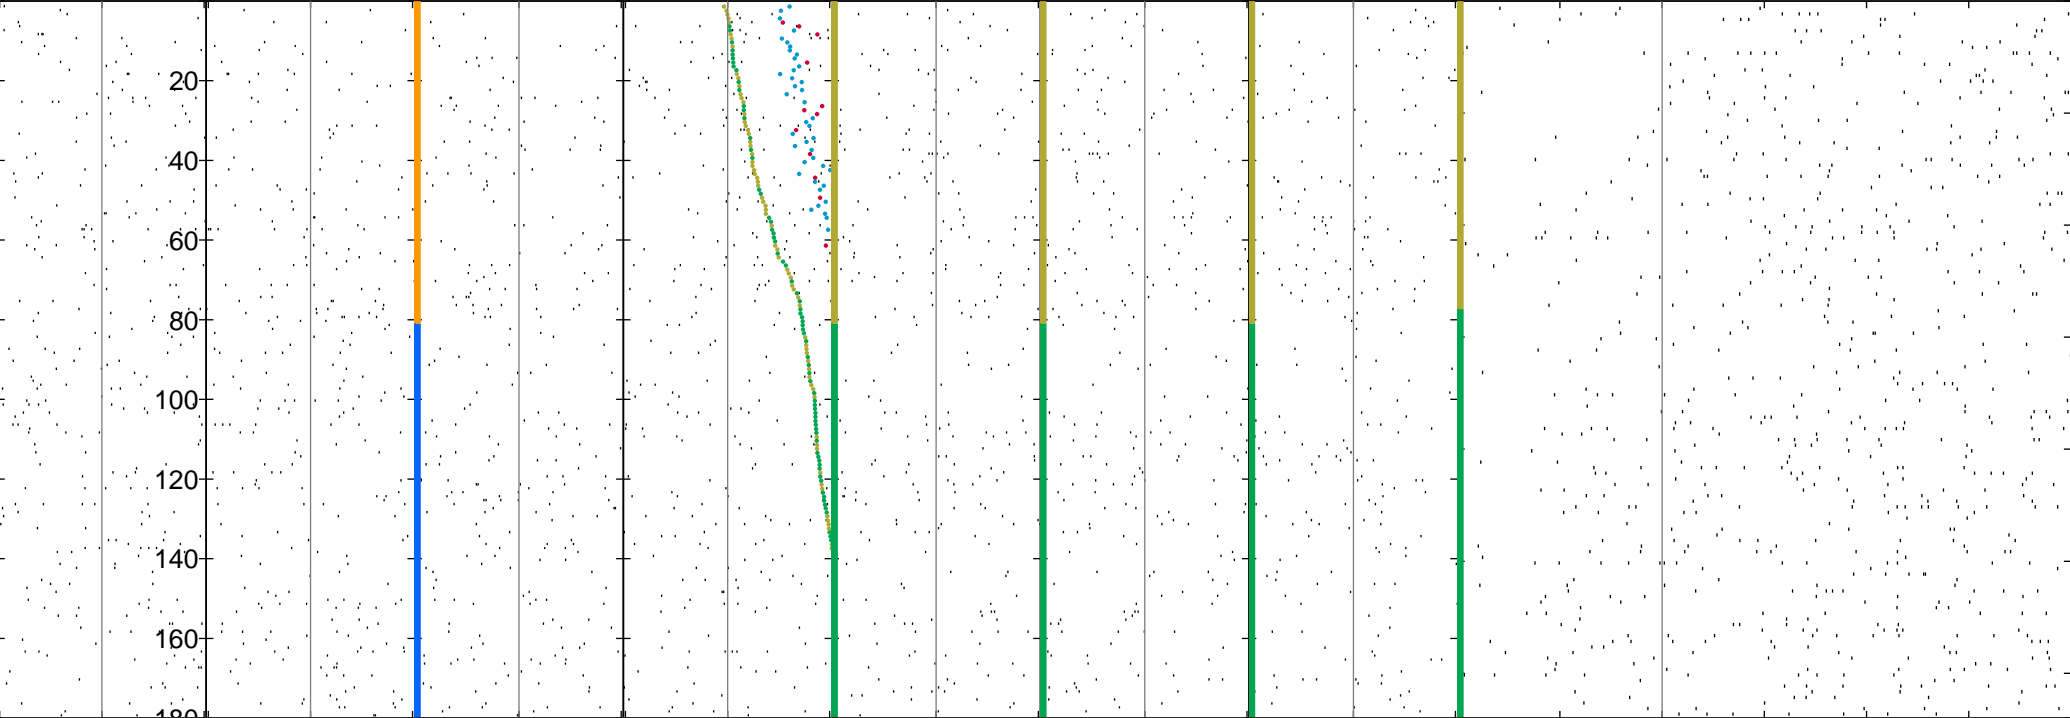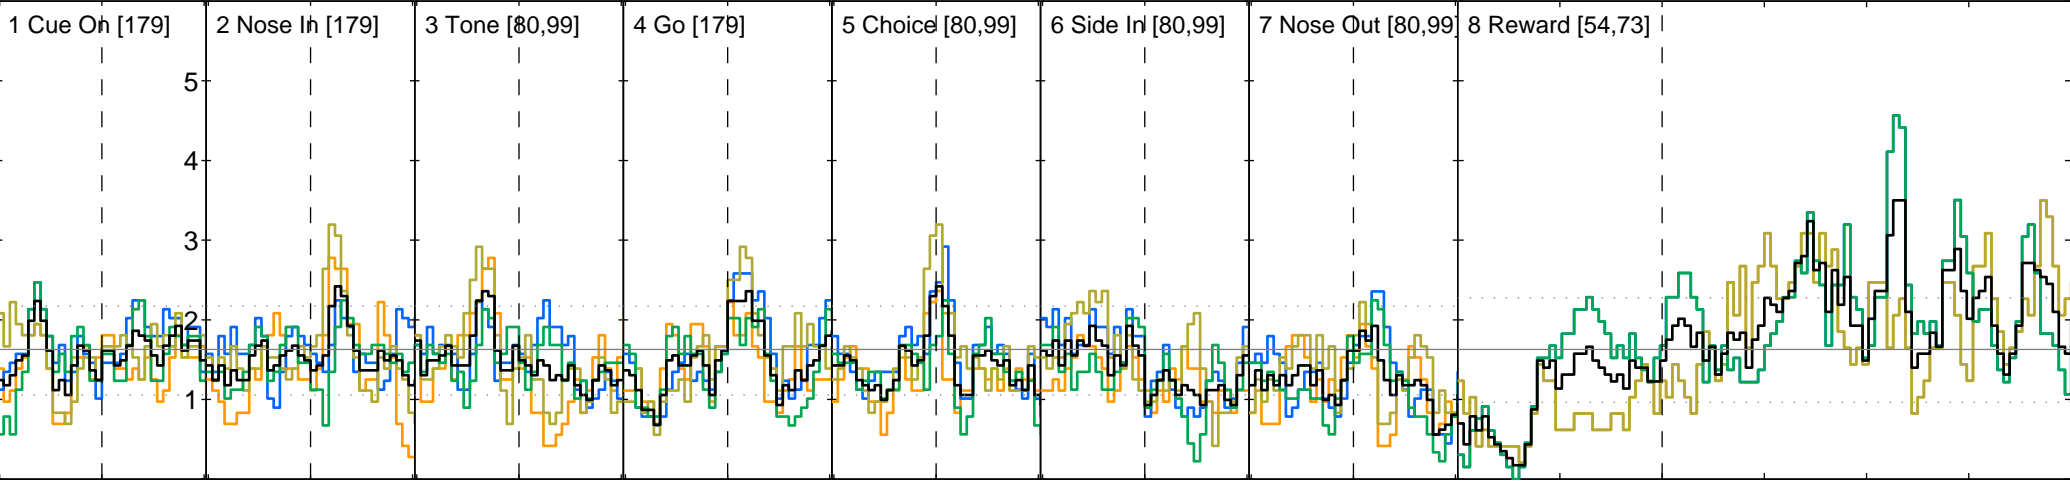

Cell: C1220071025T11a

AP: -2.8 ML: 4.2 DV: 6.8

w: 1 n: 12637  $P_{ISI>2}$ : 0.45

1/2pw: 200 $\mu$ s p->v: 490 $\mu$ s

$\beta_T$ : 4.8  $\beta_D$ : -4.3

$\beta_P$ : 3.4 SI: -0.46

Session FR: 1.87 Hz

Pk Ev: 5 - Choice (Tone2)

Pk FR: 9.09Hz (0.33s) Unc

Waveform

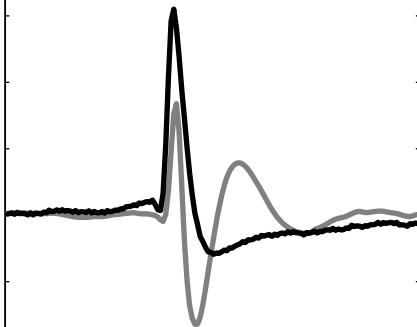

HP/PV

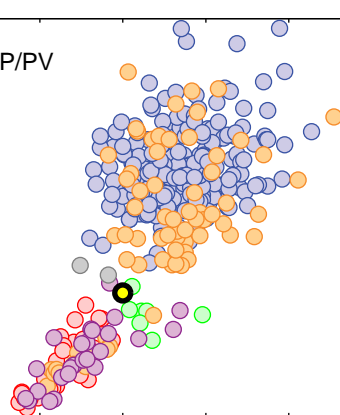

FR/PV

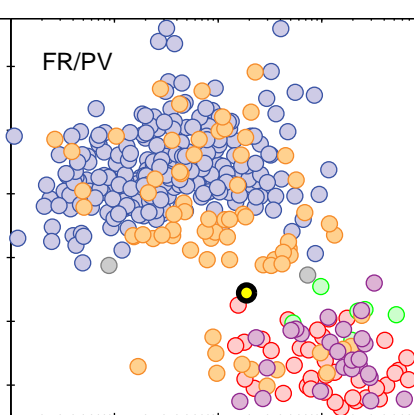

ISI Histogram [343]

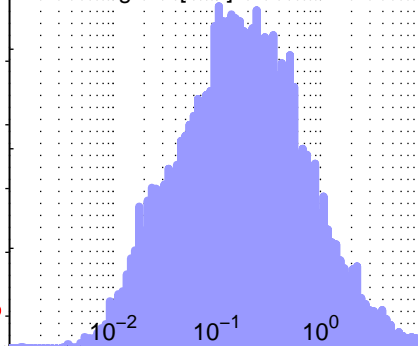

10

20

30

40

50

60

70

1 Cue On [77]

2 Nose In [77]

3 Tone [44,33]

4 Go [77]

5 Choice [38,39]

6 Side In [38,39]

7 Nose Out [38,39]

8 Reward [31,26]

8

6

4

2

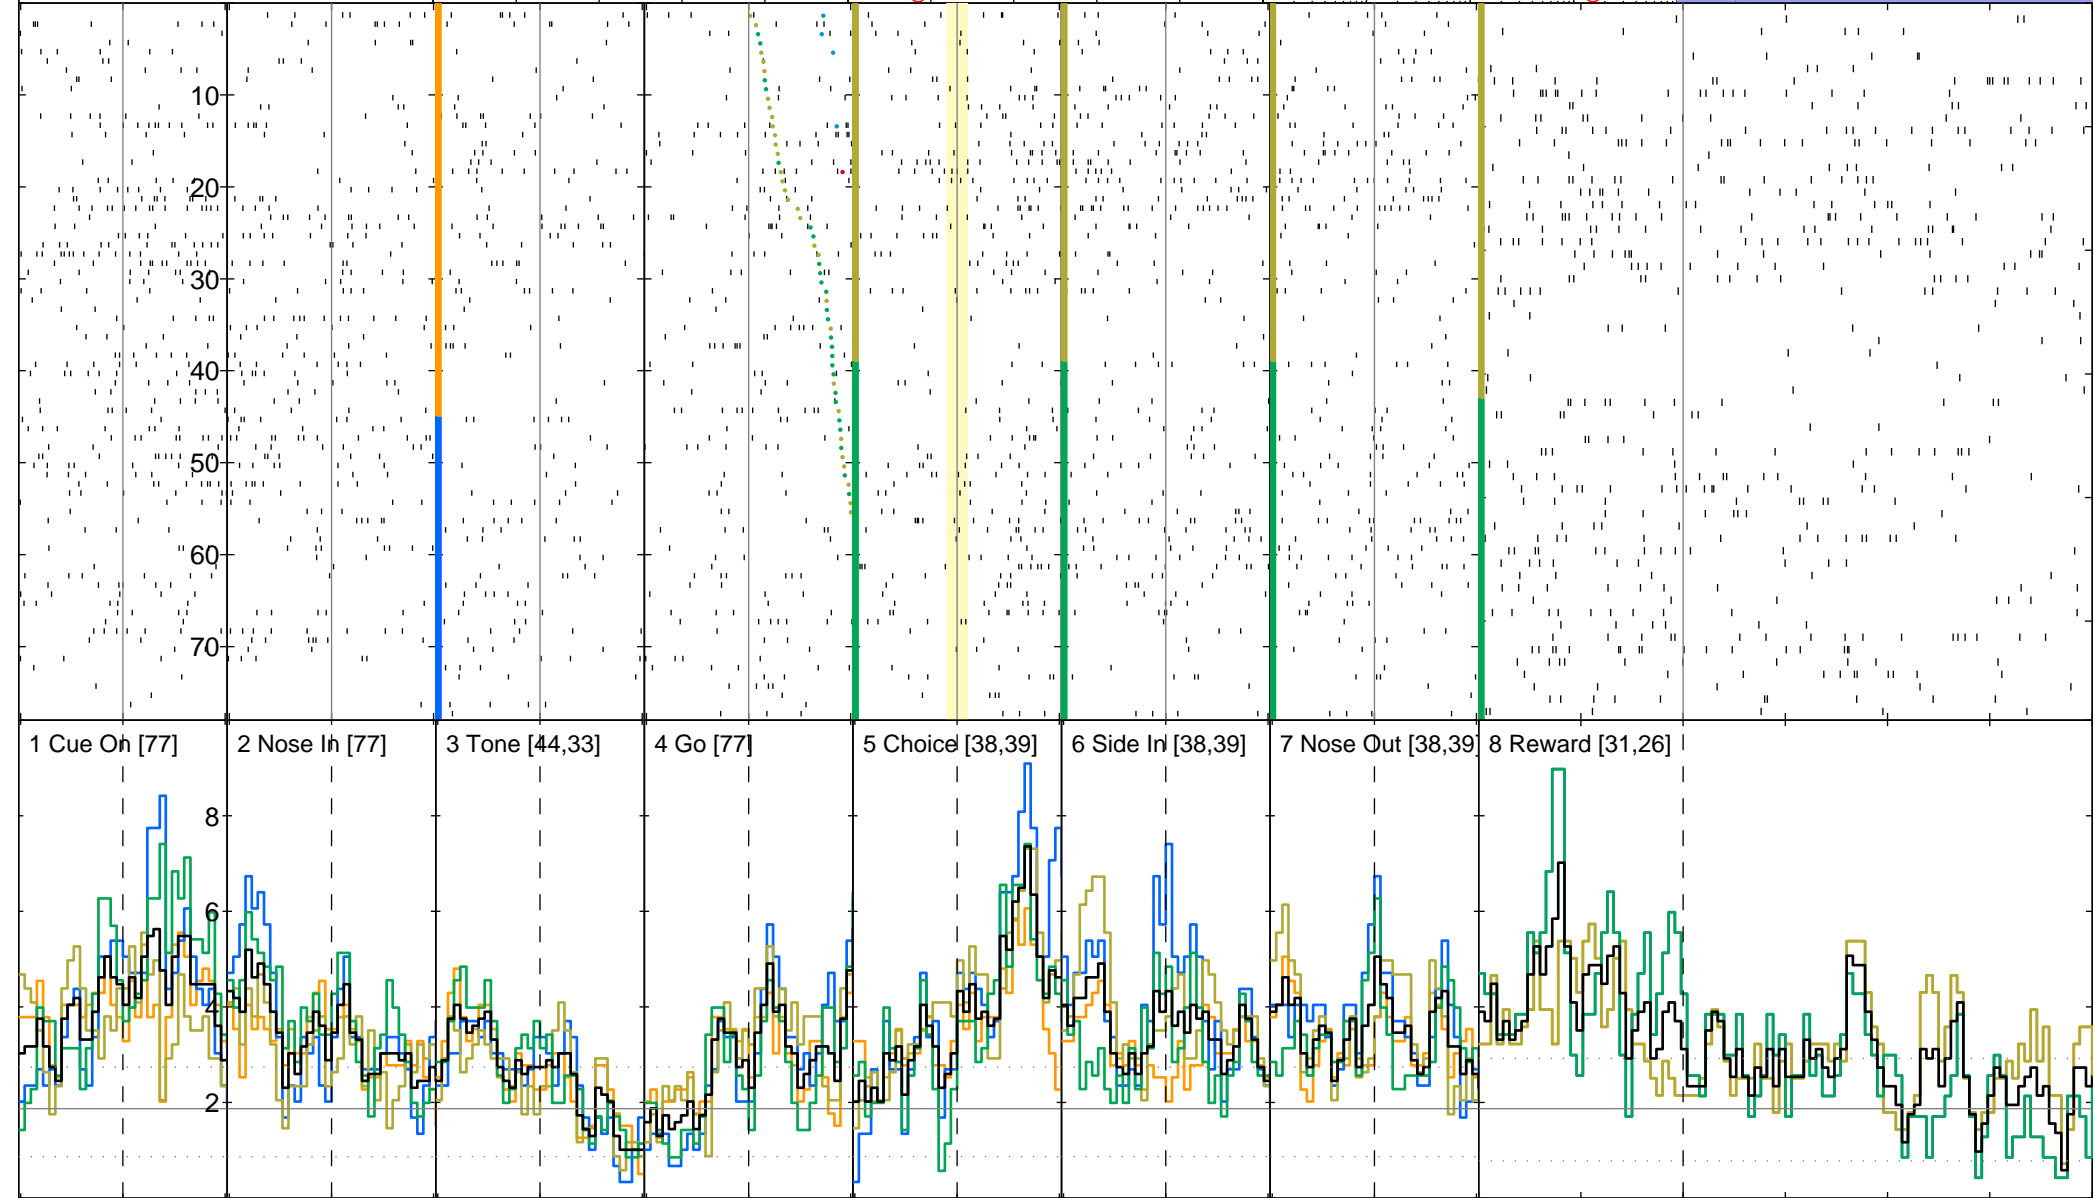

Cell: C0320070624T06b

AP: 1.7 ML: 1.3 DV: 6.8

w: 4 n: 27455  $P_{ISI>2}$ : 0.012

1/2pw: 182 $\mu$ s p $\rightarrow$ v: 546 $\mu$ s

$\beta_T$ : -3  $\beta_D$ : 3.6

$\beta_P$ : 3.6 SI: 0.47

Session FR: 7.34 Hz

Pk Ev: 6 - Side In (Tone1)

Pk FR: 19.1Hz (0.66s) **Unc**

Waveform

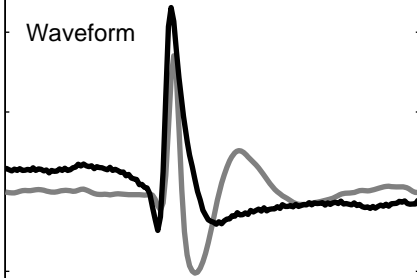

HP/PV

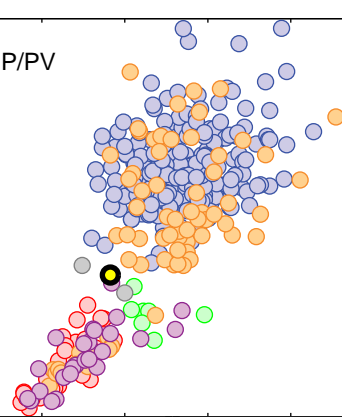

FR/PV

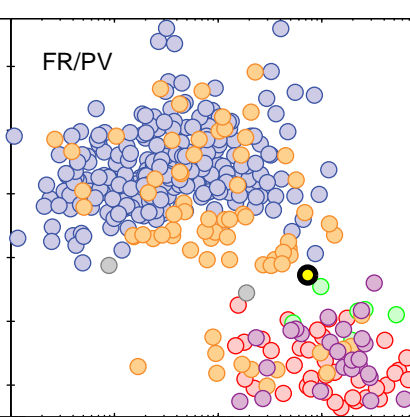

ISI Histogram [843]

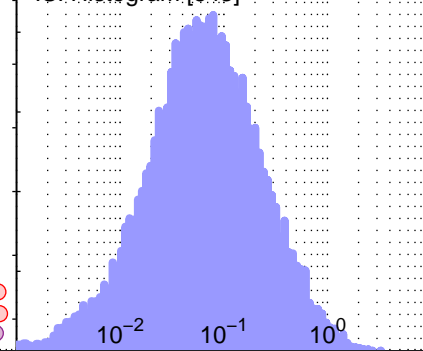

20  
40  
60  
80  
100  
120  
140

1 Cue On [143] 2 Nose In [143] 3 Tone [68,75] 4 Go [148] 5 Choice [69,74] 6 Side In [69,74] 7 Nose Out [69,74] 8 Reward [54,61]

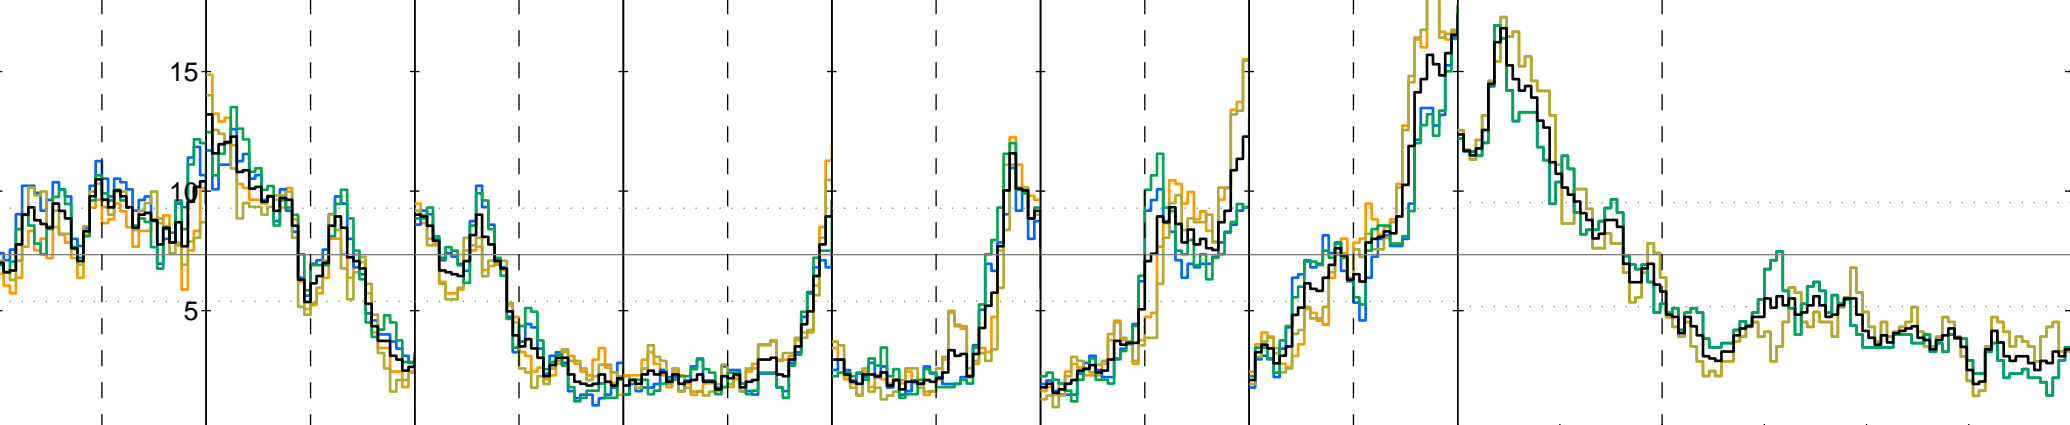

Cell: C0320070618T09h

AP: 1.6 ML: 3.7 DV: 4.9

w: 3 n: 24930  $P_{ISI>2}$ : 0

1/2pw: 258 $\mu$ s p $\rightarrow$ v: 2296 $\mu$ s

$\beta_T$ : 2.9  $\beta_D$ : -6.1

$\beta_P$ : -2.7 SI: -0.68

Session FR: 4.96 Hz

Pk Ev: 7 - Nose out (Contra)

Pk FR: 11.4Hz (0.09s) **Unc**

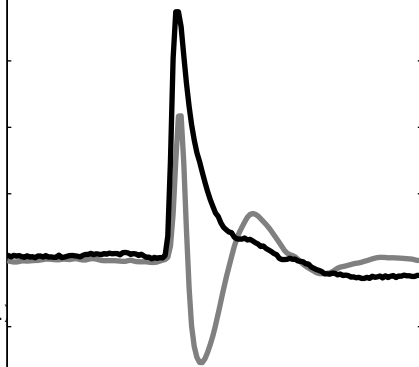

HP/PV

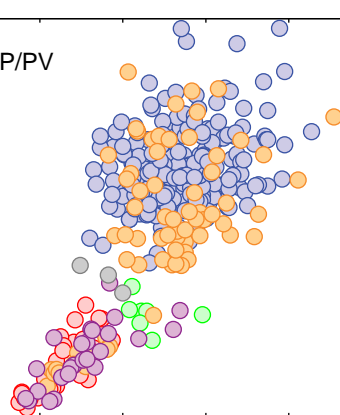

FR/PV

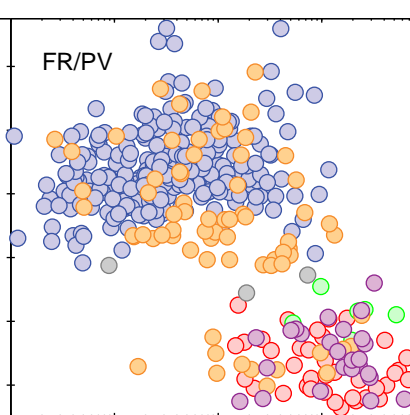

ISI Histogram [1154]

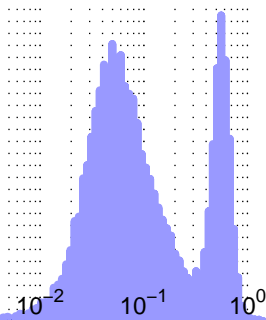

10  
20  
30  
40  
50  
60  
70  
80  
90

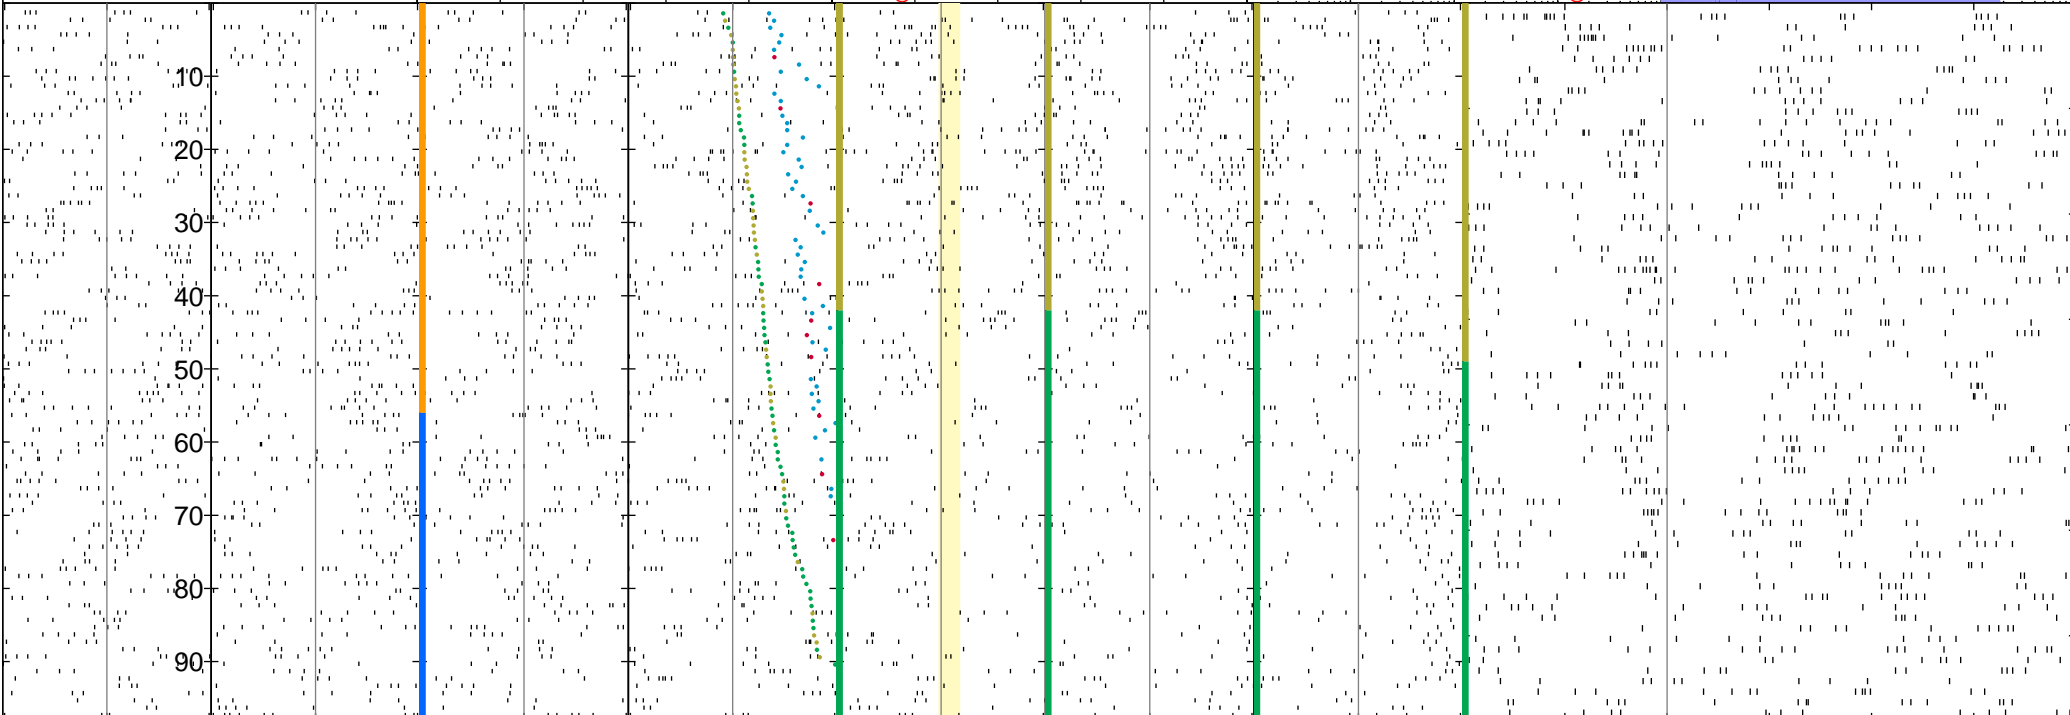

1 Cue On [97]

2 Nose In [97]

3 Tone [55,42]

4 Go [97]

5 Choice [41,56]

6 Side In [41,56]

7 Nose Out [41,56]

8 Reward [33,34]

10  
5

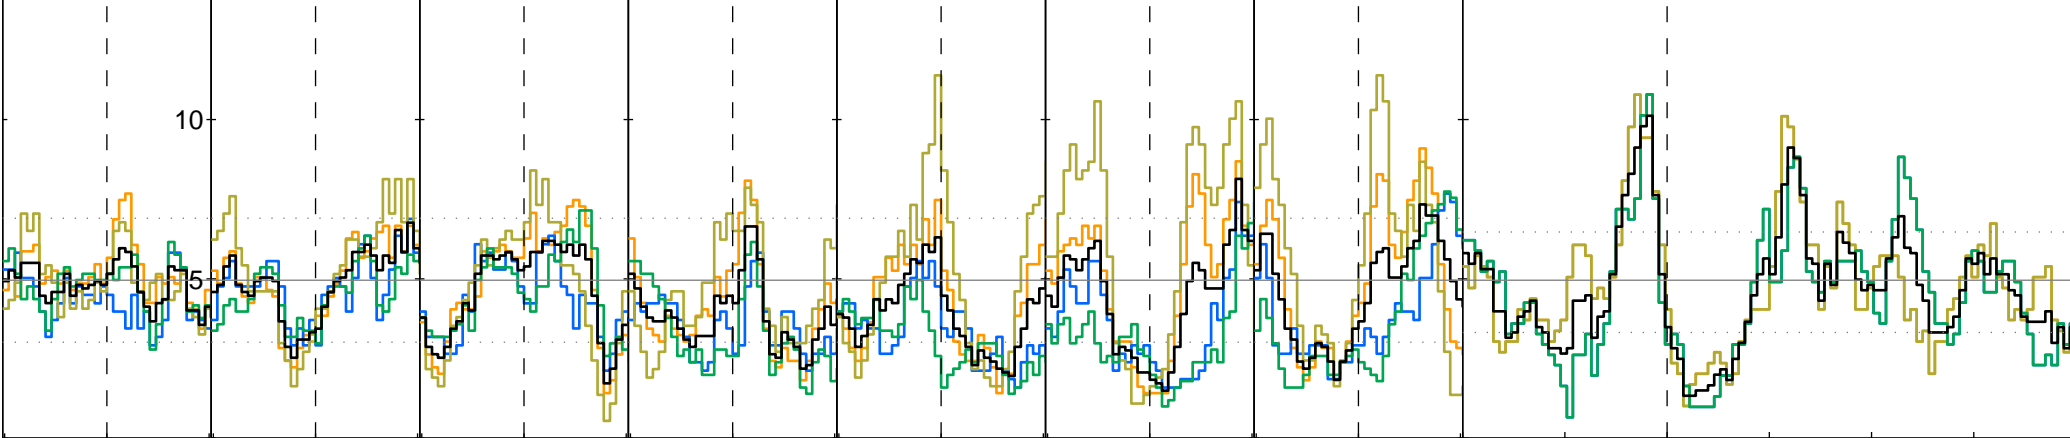

**Cell: C0320070611T15c**

AP: -2.3 ML: 4.6 DV: 6  
w: 3 n: 657  $P_{ISI>2}$ : 0.98  
1/2pw: 149 $\mu$ s p->v: 576 $\mu$ s  
 $\beta_T$ : NaN  $\beta_D$ : NaN  
 $\beta_P$ : NaN SI: NaN  
Session FR: 0.0882 Hz  
Pk Ev: None  
Pk FR: --

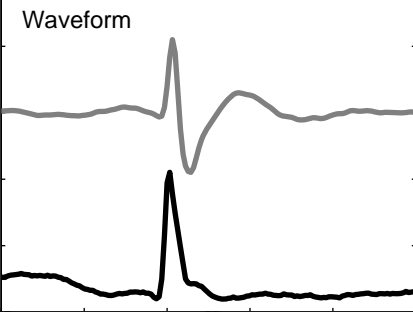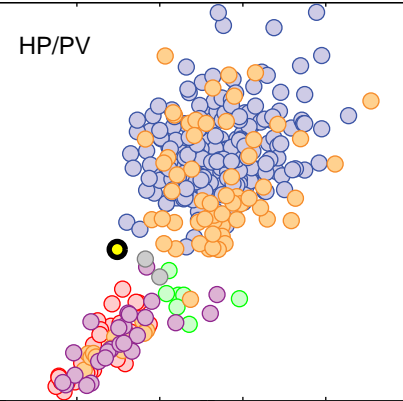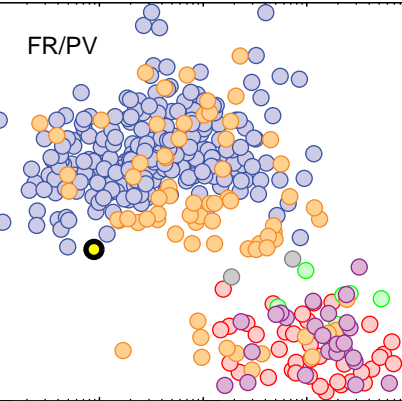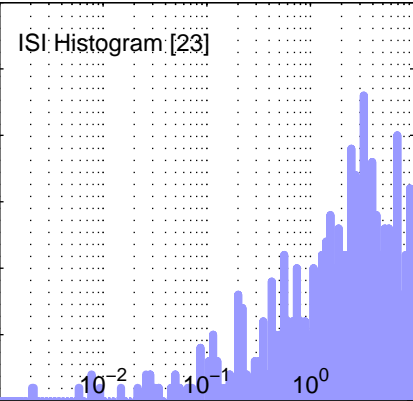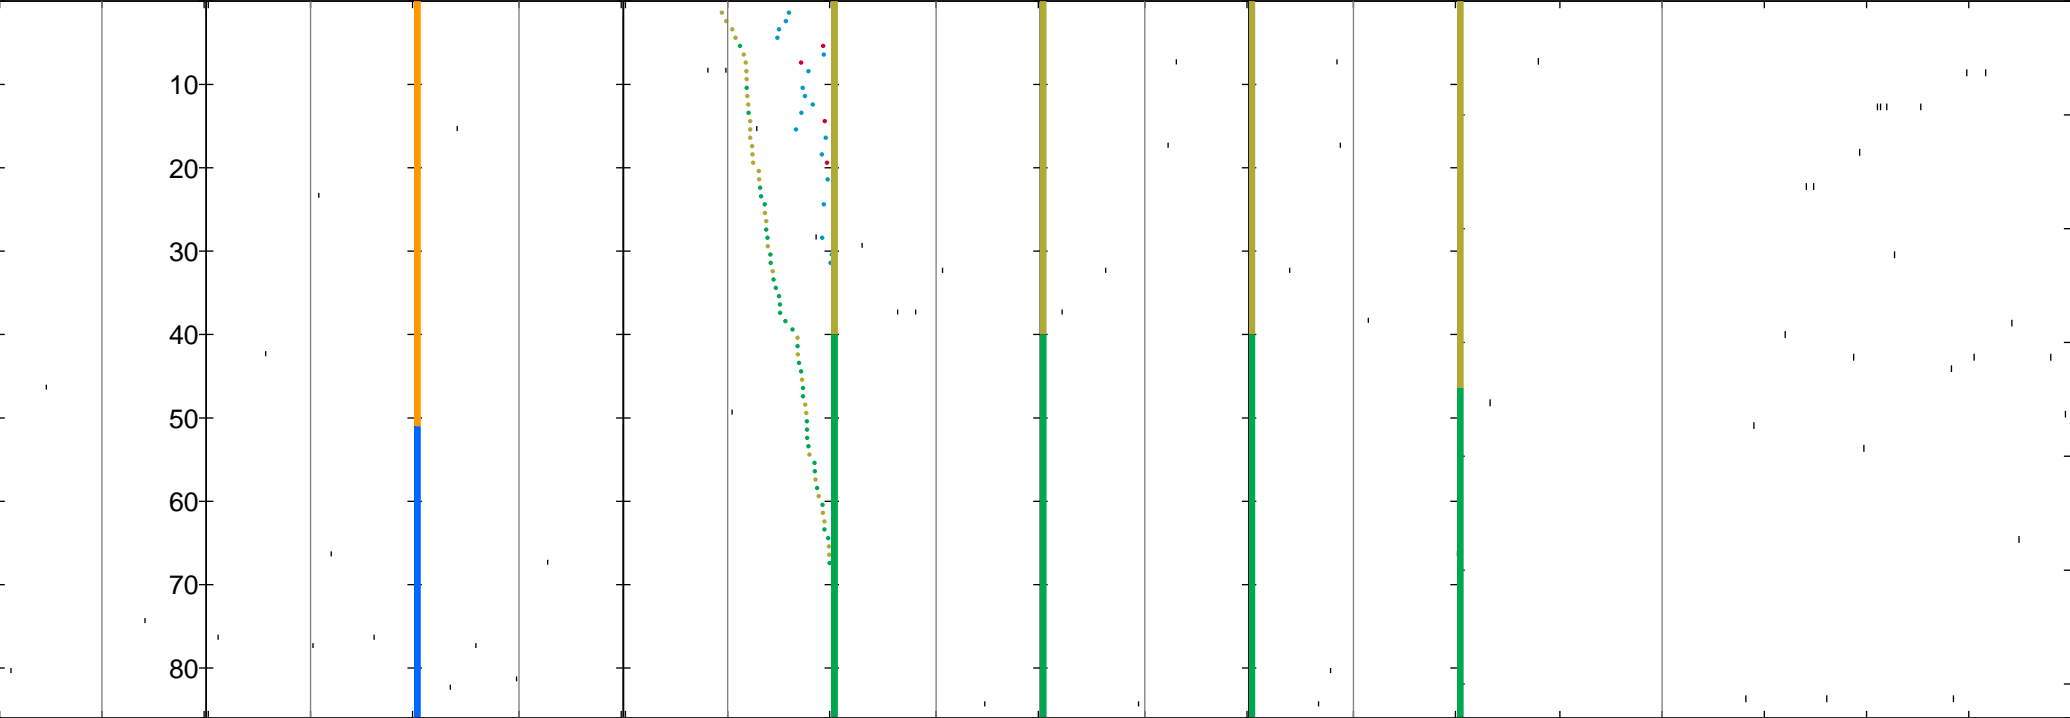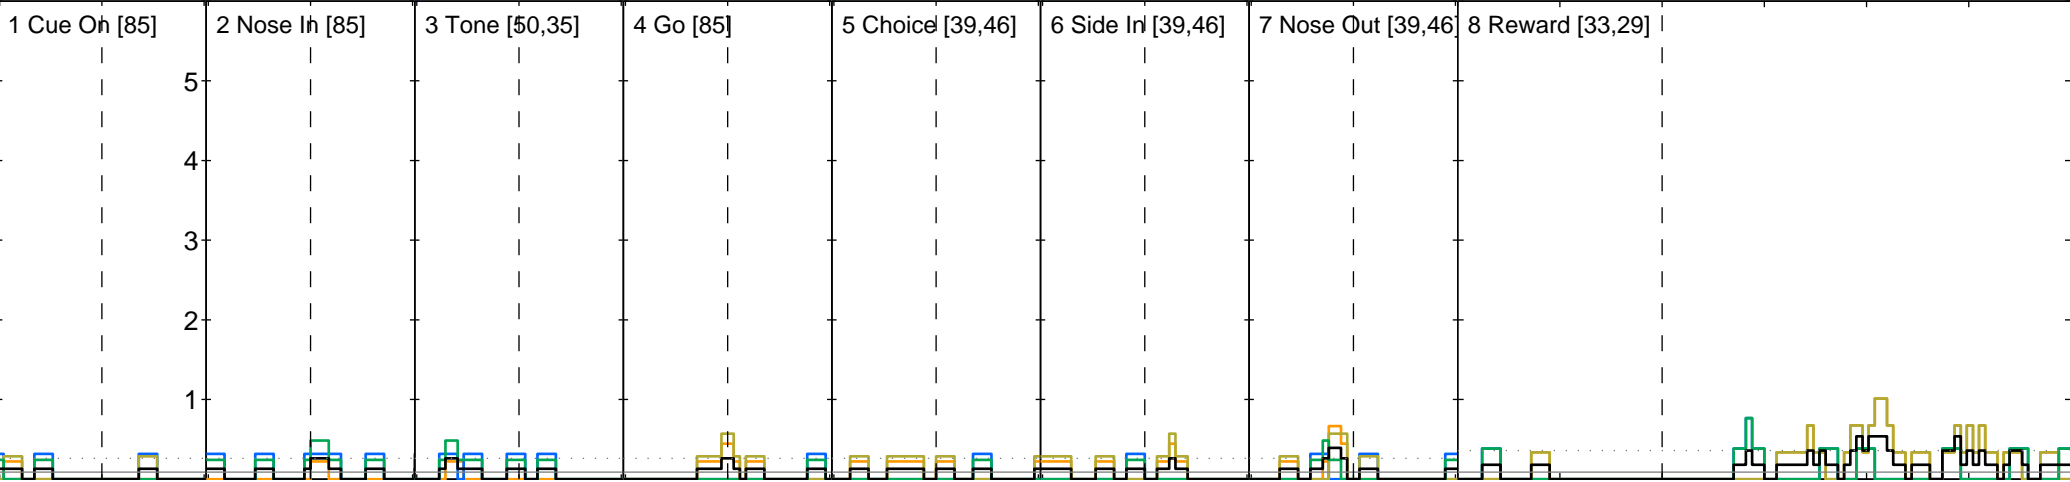



Cell: C0420070314T05a

AP: 2.5 ML: 1.3 DV: 6.7

w: 2 n: 75101  $P_{ISI>2}$ : 0.022

1/2pw: 256 $\mu$ s p $\rightarrow$ v: 466 $\mu$ s

$\beta_T$ : 2.4  $\beta_D$ : -3.2

$\beta_P$ : -3.8 SI: 0.42

Session FR: 10.1 Hz

Pk Ev: 1 - Cue on (Ipsi)

Pk FR: 19.8Hz (0.37s) Inv

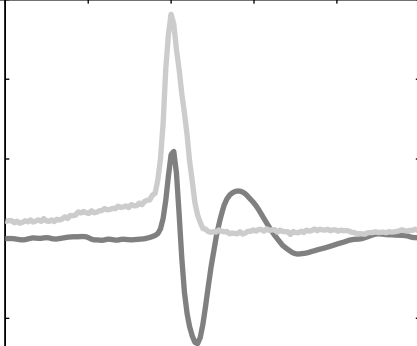

HP/PV

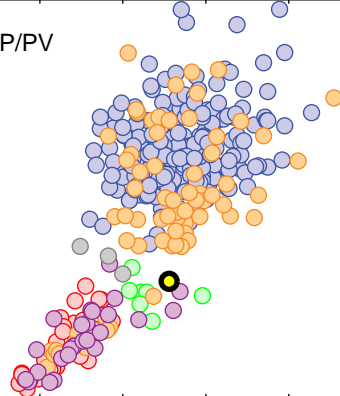

FR/PV

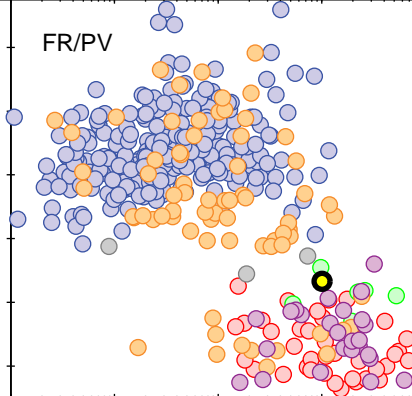

ISI Histogram [2140]

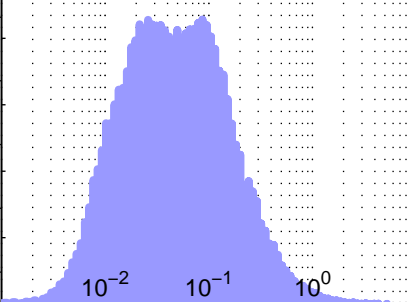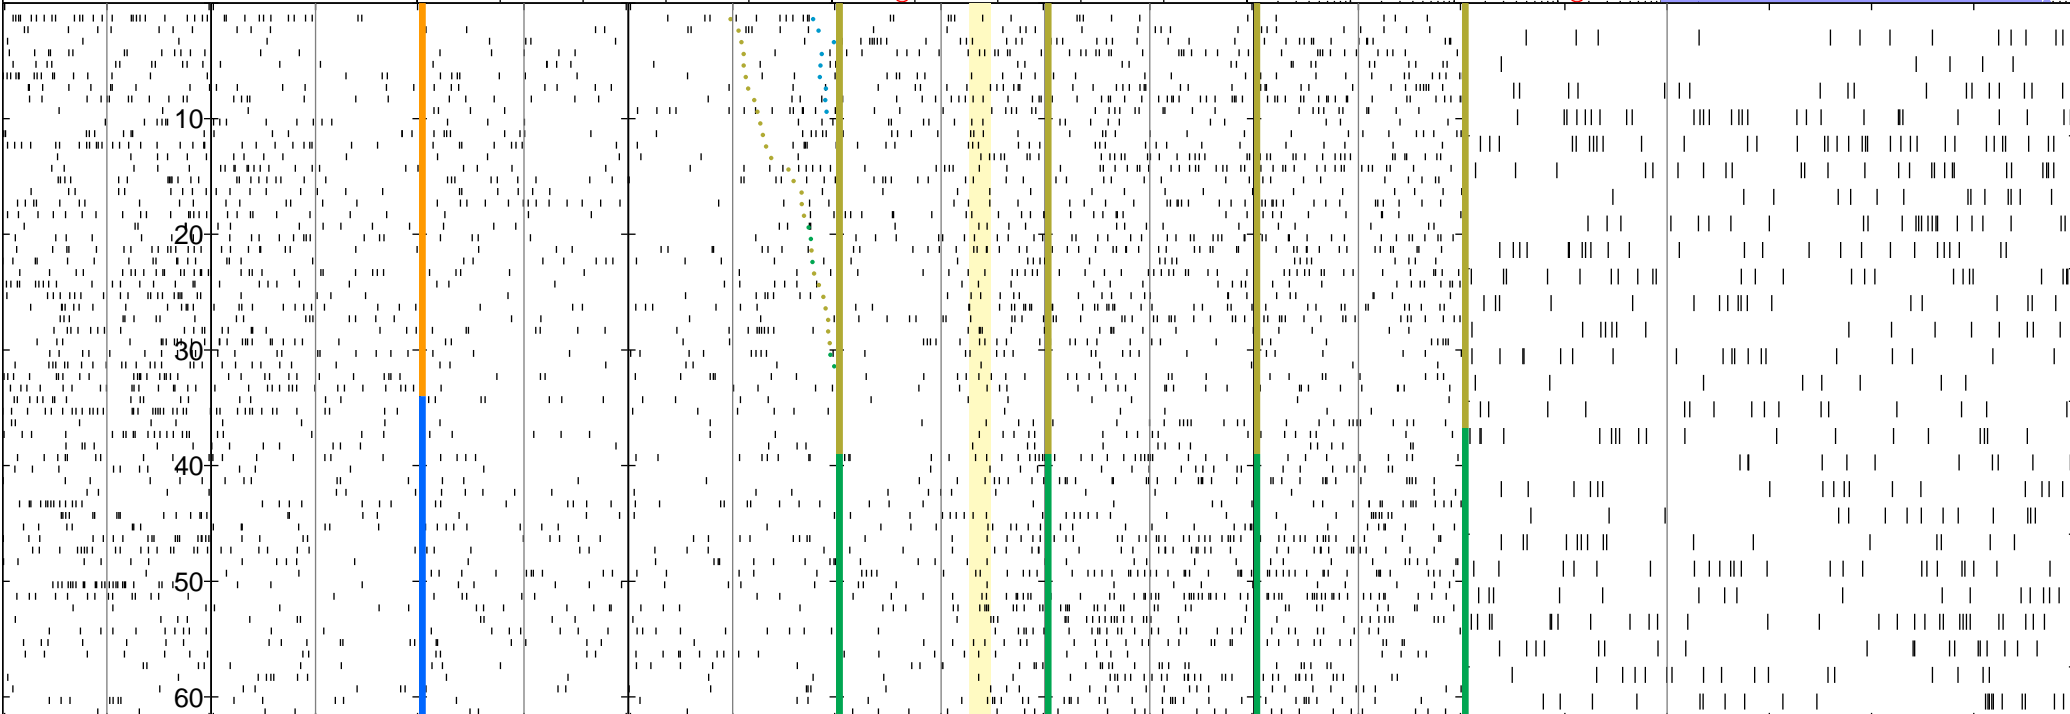

1 Cue On [61]

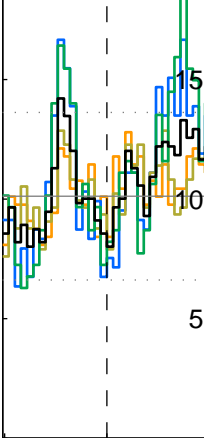

2 Nose In [61]

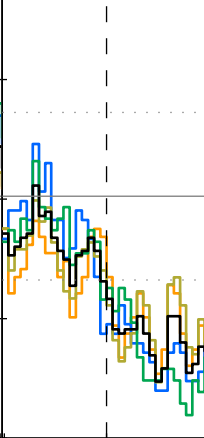

3 Tone [33,28]

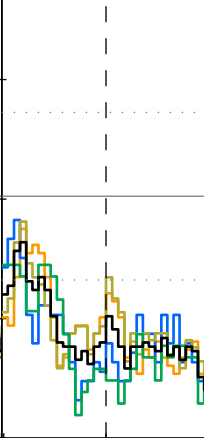

4 Go [61]

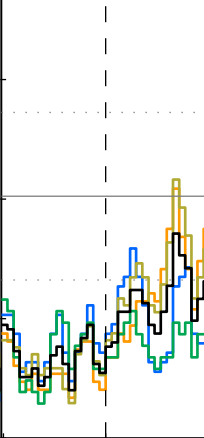

5 Choice [38,23]

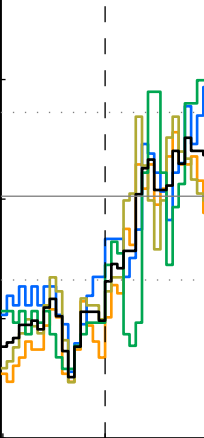

6 Side In [38,23]

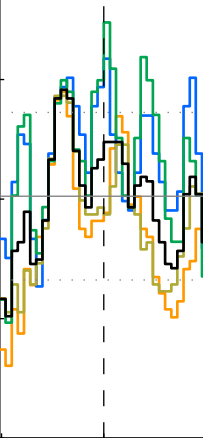

7 Nose Out [38,23]

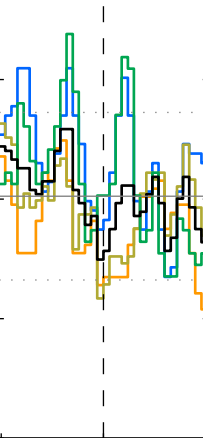

8 Reward [15,11]

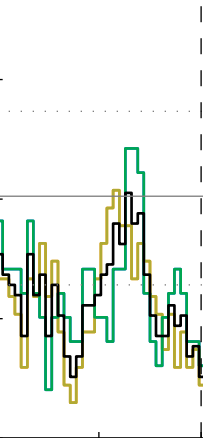



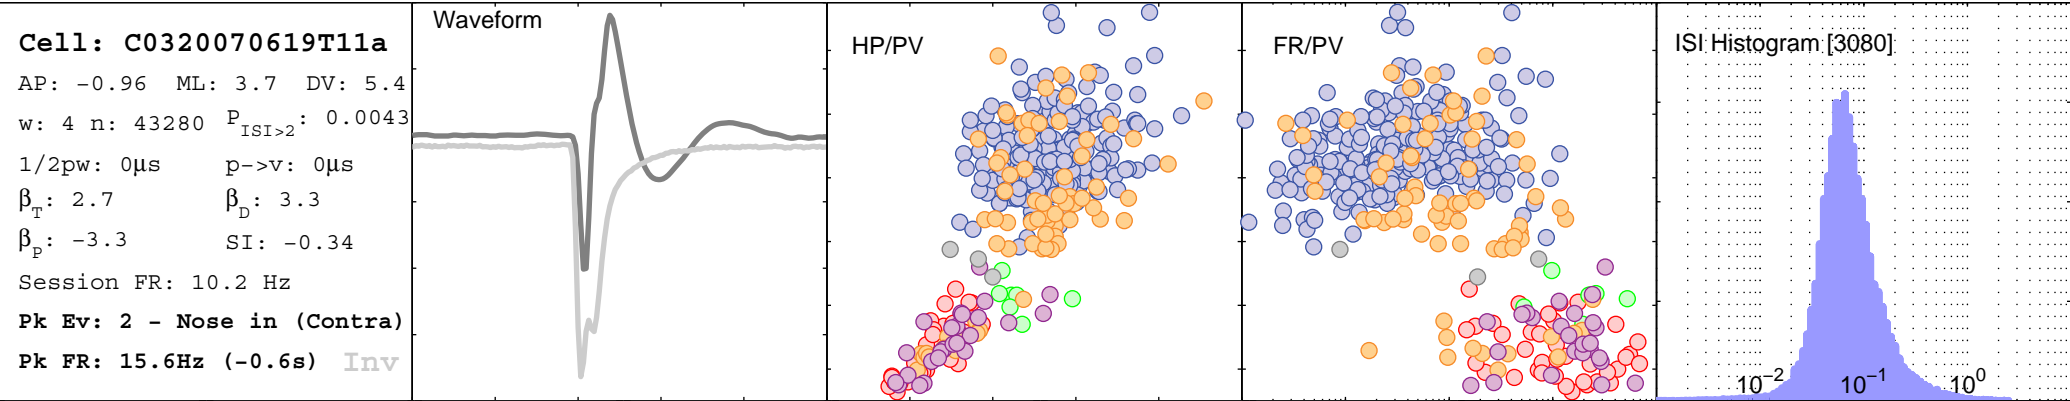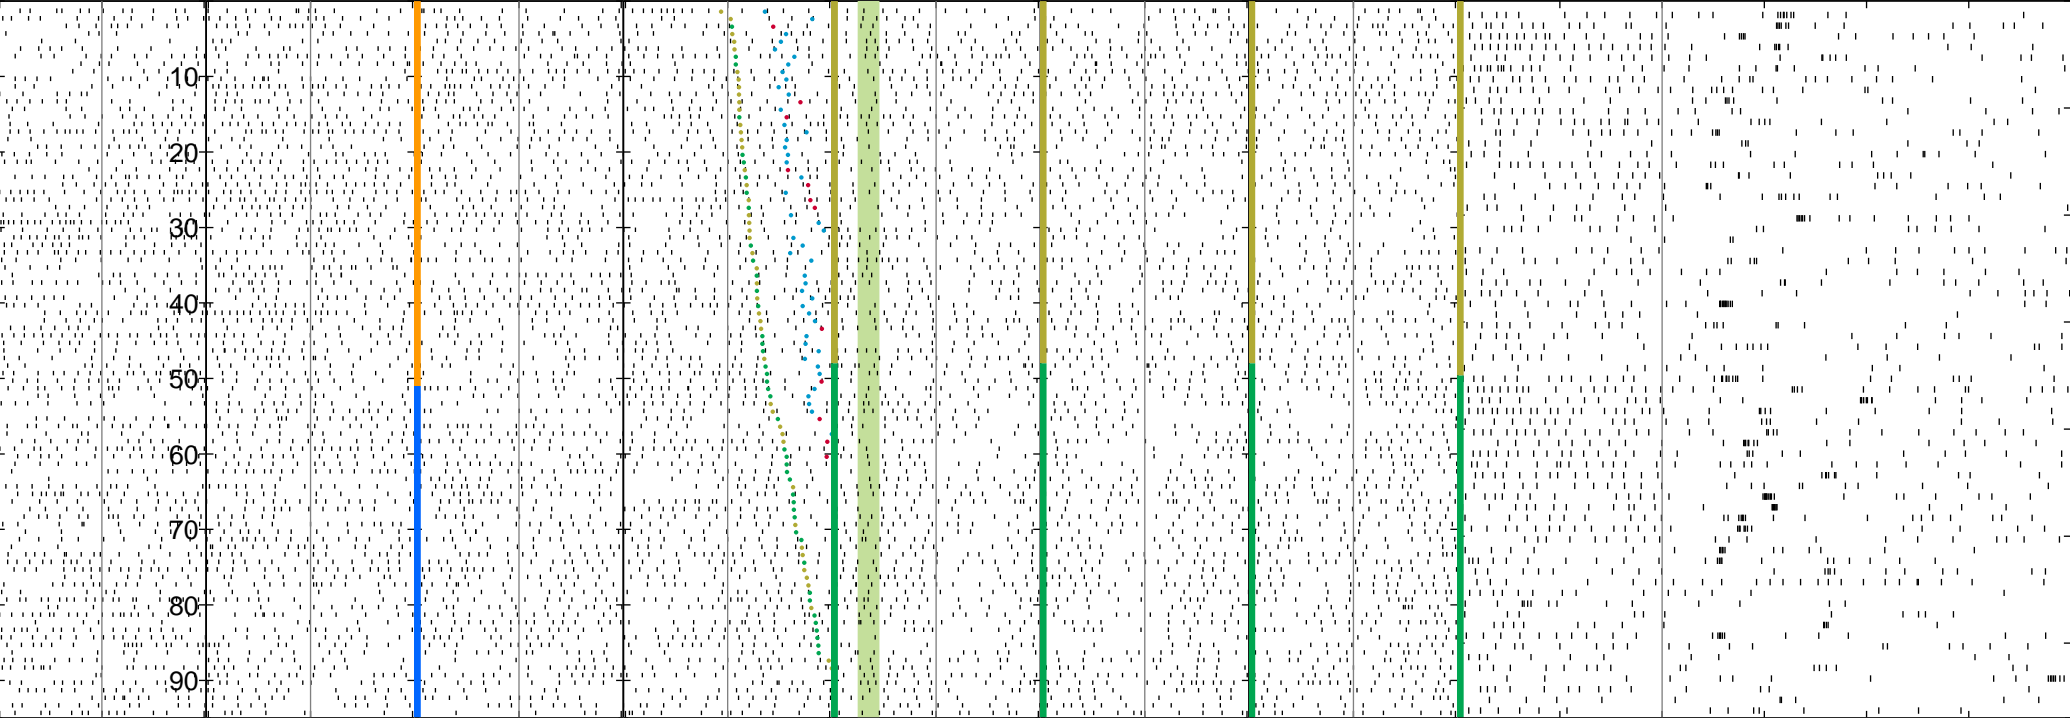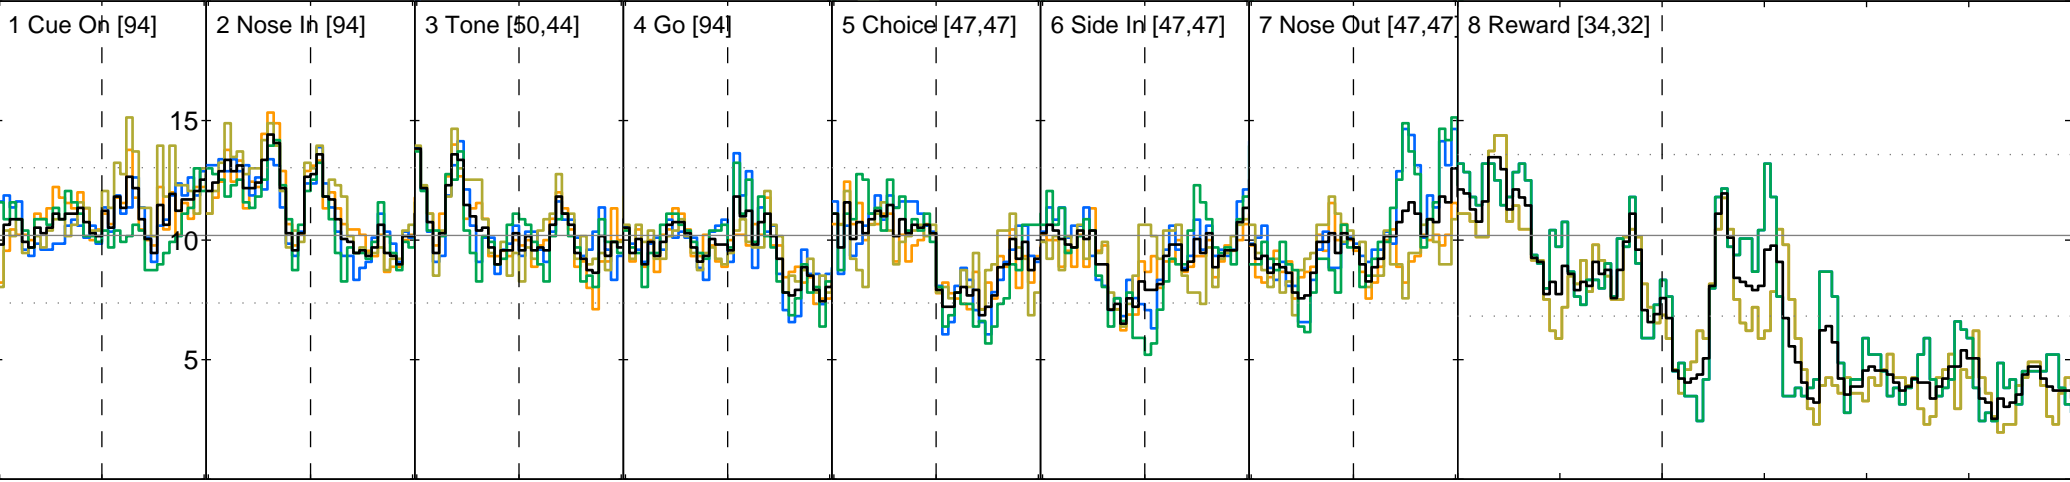

Cell: C0520070402R02a

AP: 0.24 ML: 4 DV: 6.2

w: 1 n: 29729  $P_{ISI>2}$ : 0

1/2pw: 389 $\mu$ s p->v: 794 $\mu$ s

$\beta_T$ : -2.5  $\beta_D$ : 3.6

$\beta_P$ : -3.3 SI: 0.28

Session FR: 6.52 Hz

Pk Ev: 3 - Tone (Tone1)

Pk FR: 18.1Hz (0.12s) Inv

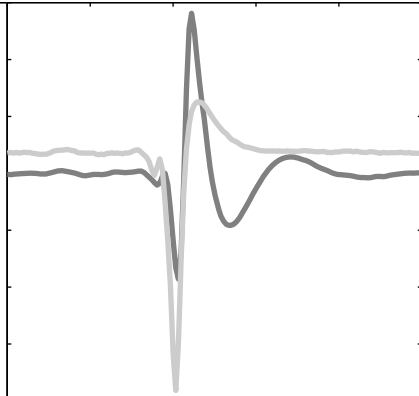

HP/PV

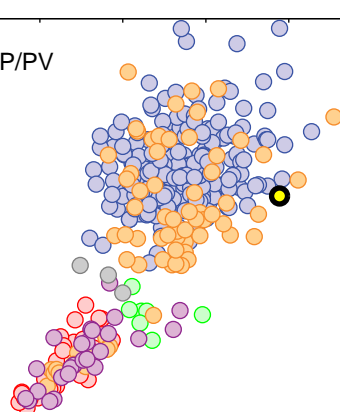

FR/PV

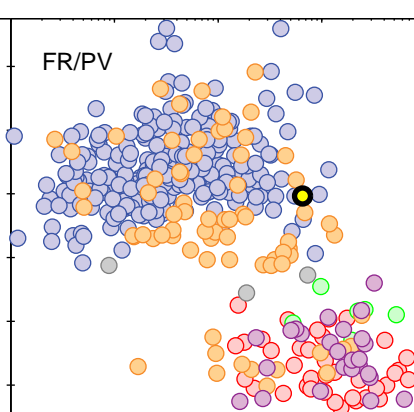

ISI Histogram [1254]

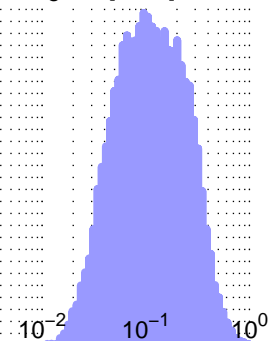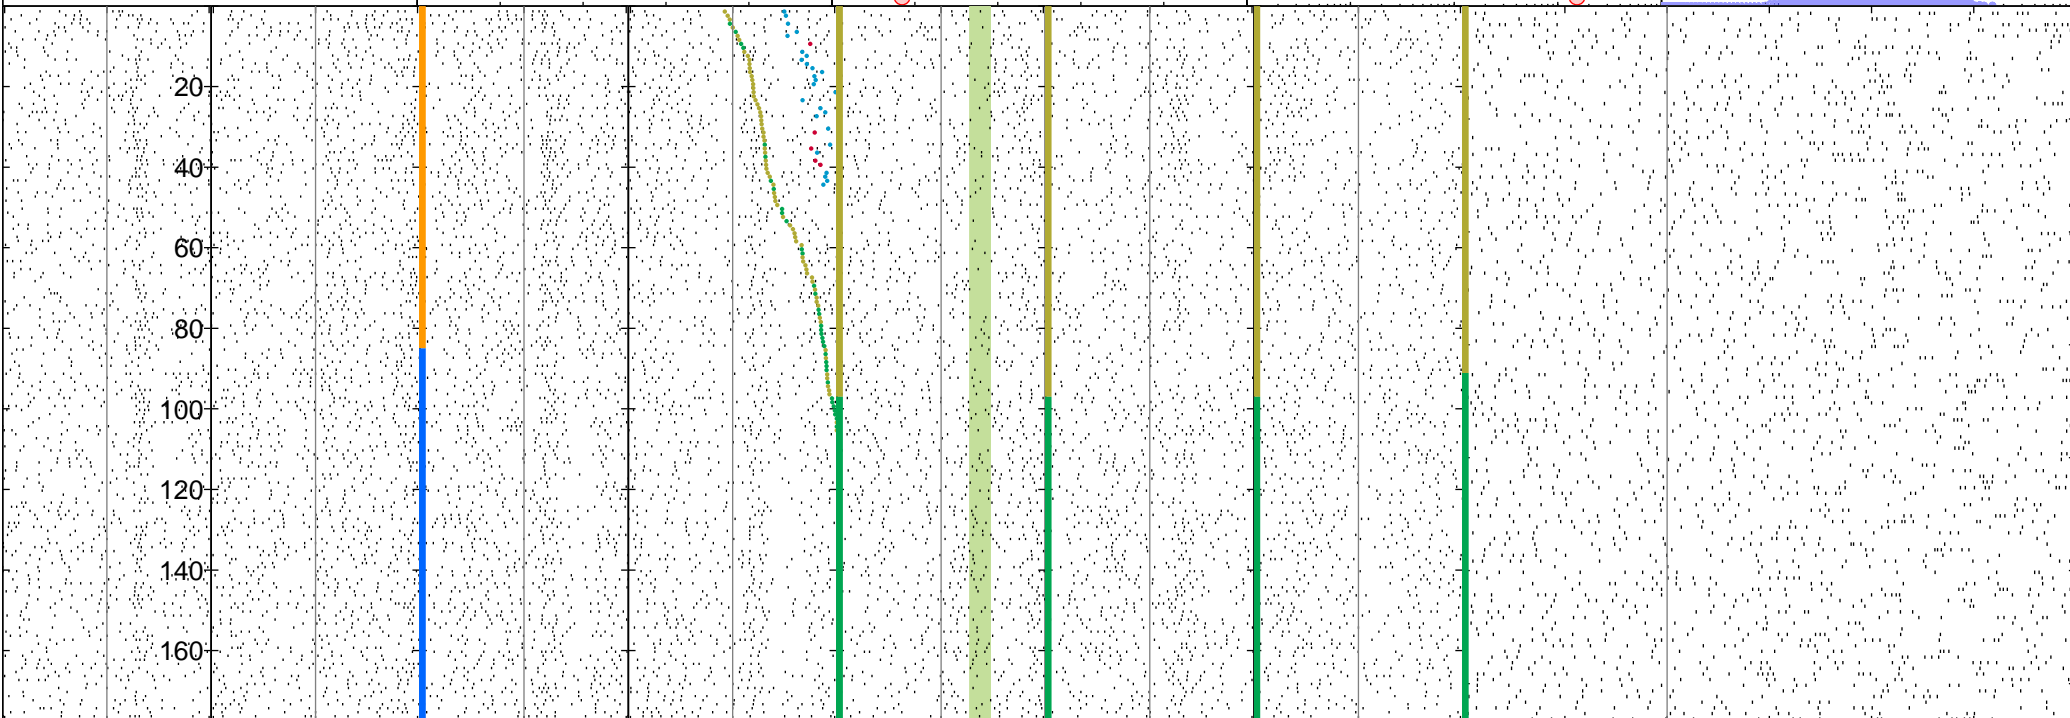

1 Cue On [177]

2 Nose In [177]

3 Tone [84,93]

4 Go [177]

5 Choice [96,81]

6 Side In [96,81]

7 Nose Out [96,81]

8 Reward [64,62]

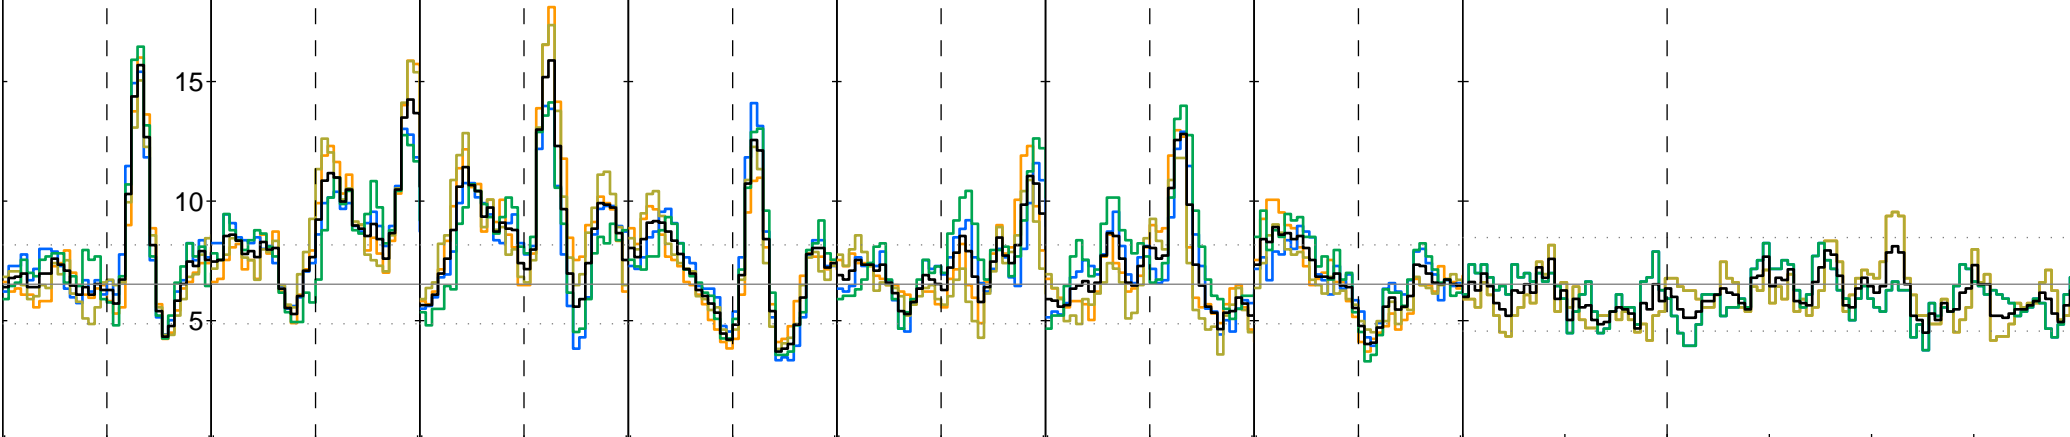

**Cell: C1220071114T03b**

AP: 3.2 ML: 2.6 DV: 2.4

w: 1 n: 10715  $P_{ISI>2}$ : 0.361/2pw: 270 $\mu$ s p->v: 542 $\mu$ s $\beta_T$ : 2.1  $\beta_D$ : 2.5 $\beta_P$ : -2.5 SI: NaN

Session FR: 1.76 Hz

Pk Ev: 3 - Tone (Ipsi)

Pk FR: 10.2Hz (0.63s) Inv

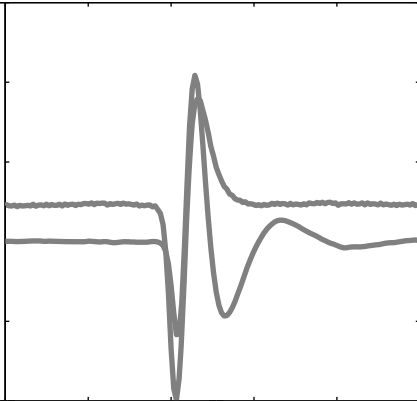

HP/PV

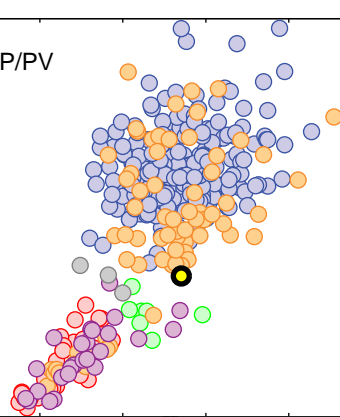

FR/PV

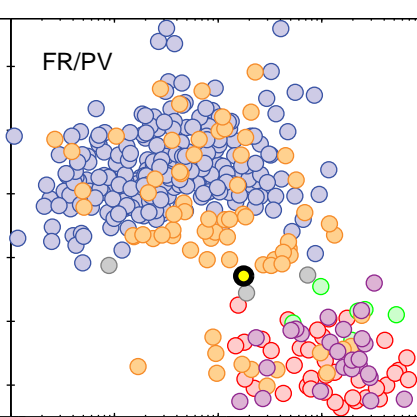

ISI Histogram [239]

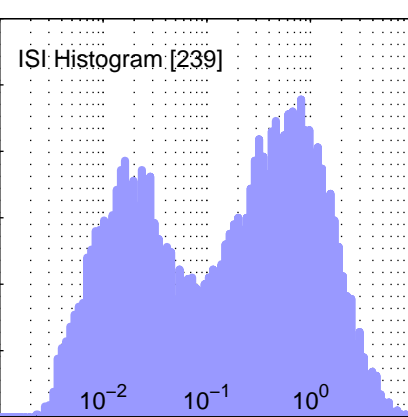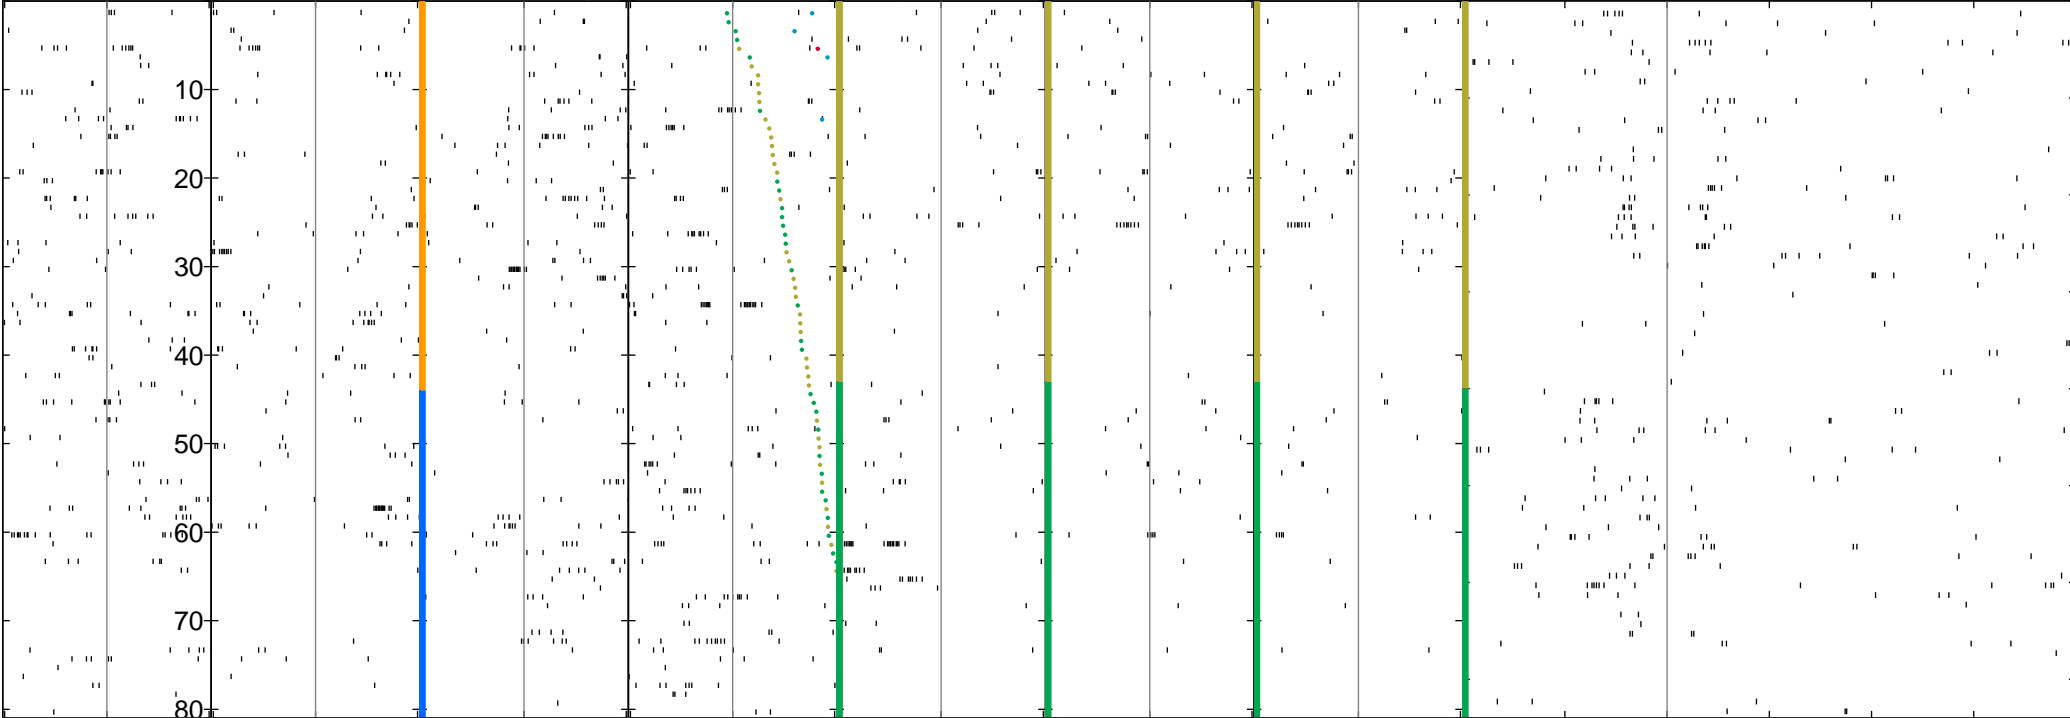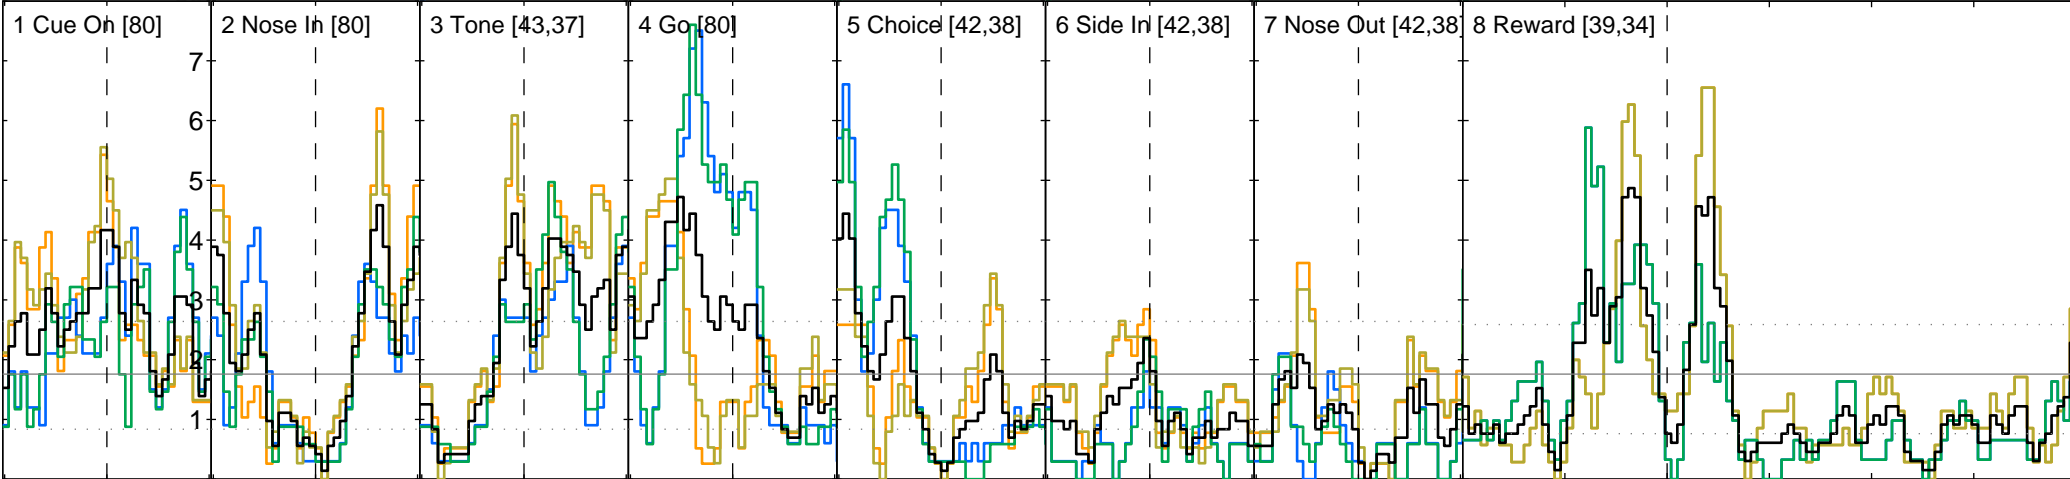

Cell: C0320070624T07a

AP: 0.96 ML: 3.6 DV: 6.5

w: 3 n: 30397  $P_{ISI>2}$ : 0

1/2pw: 118 $\mu$ s p $\rightarrow$ v: 261 $\mu$ s

$\beta_T$ : -2.4  $\beta_D$ : 3.6

$\beta_P$ : 3.5 SI: 0.28

Session FR: 8.13 Hz

Pk Ev: 4 - Go (Tone2)

Pk FR: 14.5Hz (0.00s) Inv

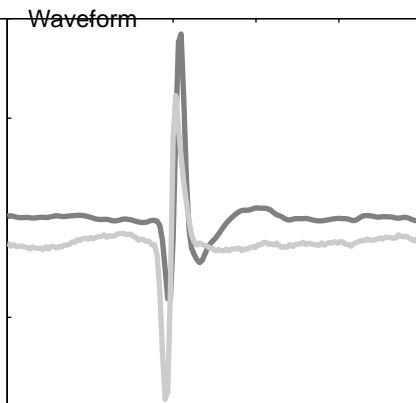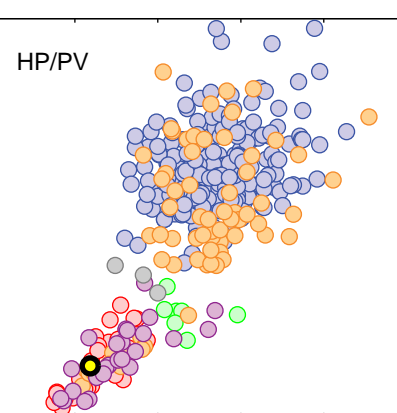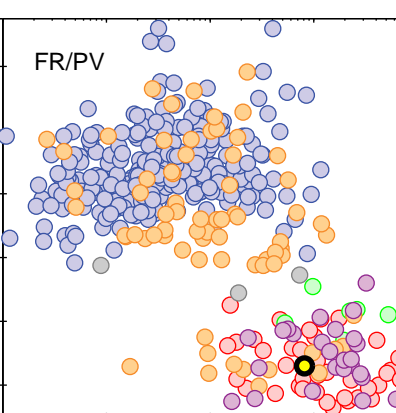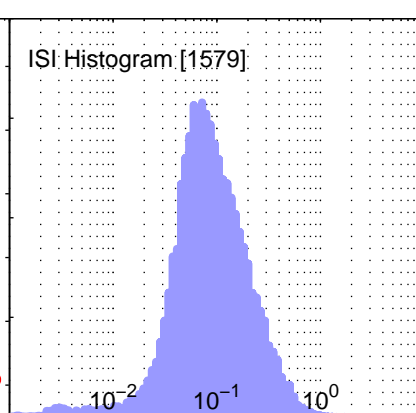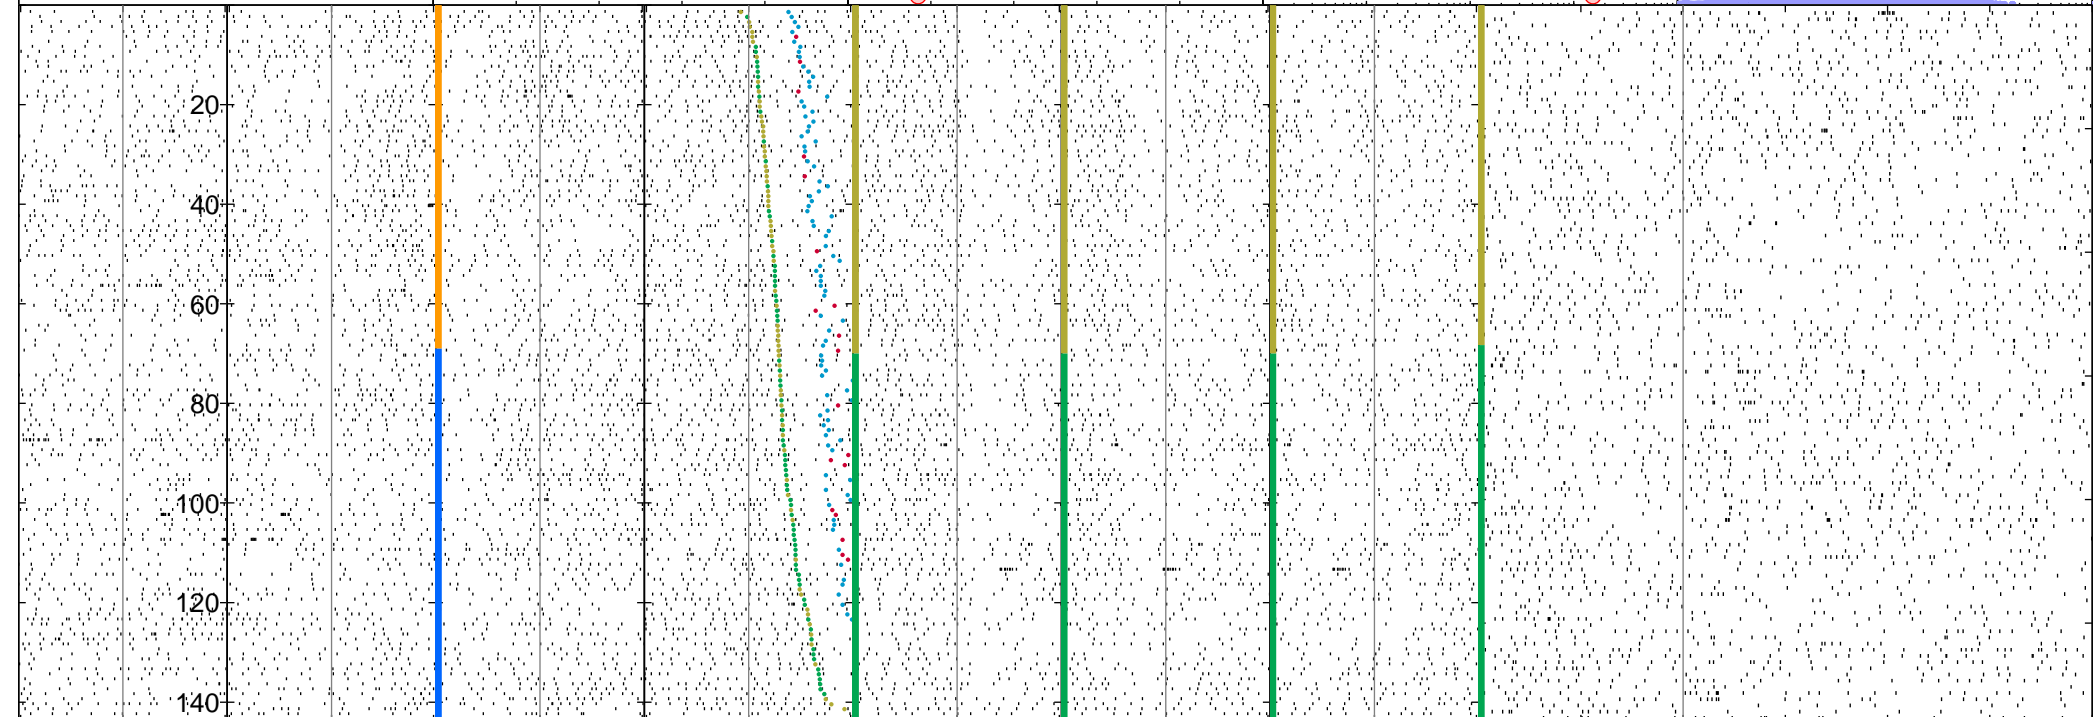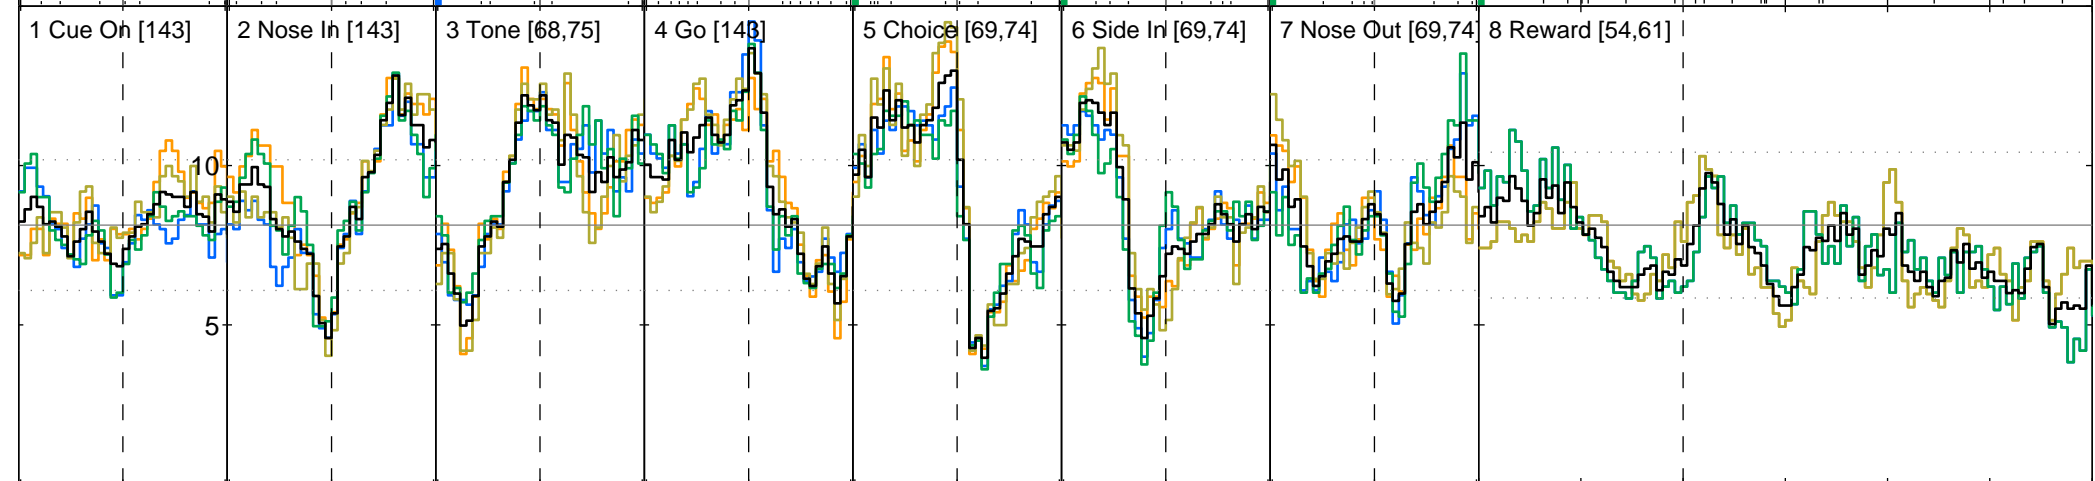

**Cell: C0520070406T11e**

AP: -0.48 ML: 4.6 DV: 4.5

w: 1 n: 18778  $P_{ISI>2}$ : 0.0451/2pw: 118 $\mu$ s p->v: 419 $\mu$ s $\beta_T$ : -5.3  $\beta_D$ : -9.8 $\beta_P$ : -4.5 SI: -0.86

Session FR: 4.3 Hz

Pk Ev: 5 - Choice (Contra)

Pk FR: 45.5Hz (0.03s) Inv

Waveform

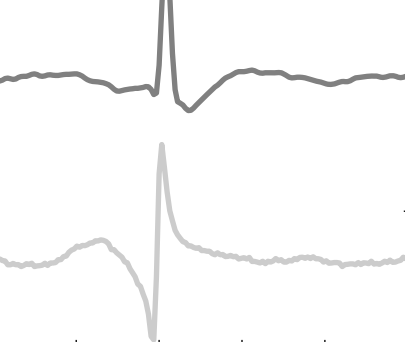

HP/PV

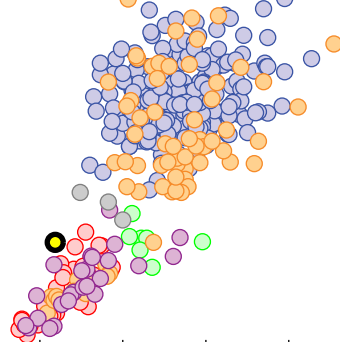

FR/PV

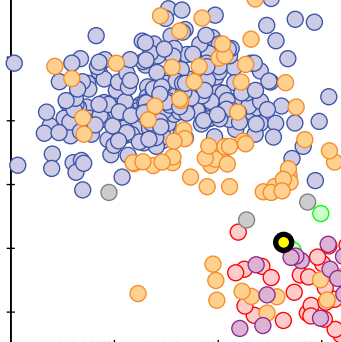

ISI Histogram [524]

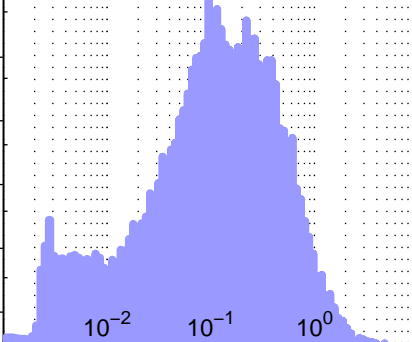

50

100

150

1 Cue On [151]

2 Nose In [151]

3 Tone [67,84]

4 Go [151]

5 Choice [75,76]

6 Side In [75,76]

7 Nose Out [75,76]

8 Reward [54,62]

50

40

30

20

10

**Cell: C0320070630T09b**

AP: 1.6 ML: 3.7 DV: 6.2

w: 1 n: 14569  $P_{ISI>2}$ : 0.0047

1/2pw: 160 $\mu$ s p $\rightarrow$ v: 525 $\mu$ s

$\beta_T$ : -3.3  $\beta_D$ : -3

$\beta_P$ : 3.7 SI: -0.31

Session FR: 4.8 Hz

Pk Ev: 5 - Choice (Tone2)

Pk FR: 13.4Hz (0.75s) Inv

Waveform

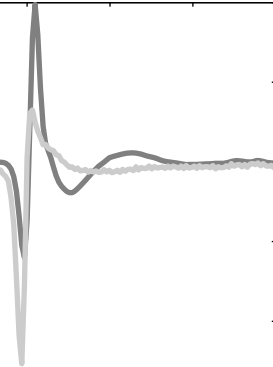

HP/PV

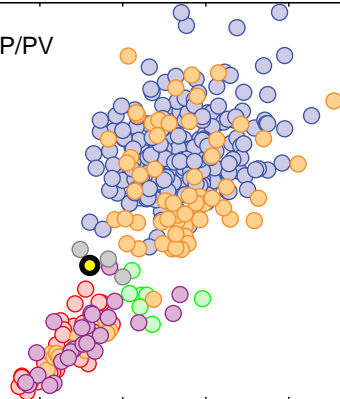

FR/PV

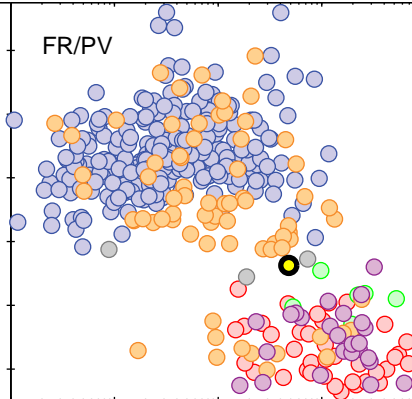

ISI Histogram [639]

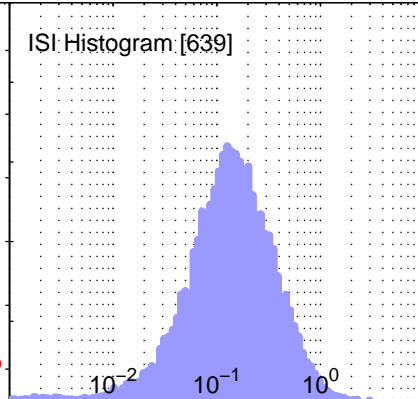

10  
20  
30  
40  
50  
60  
70  
80

1 Cue On [82]

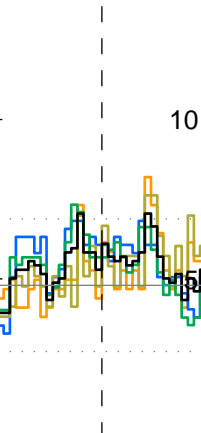

2 Nose In [82]

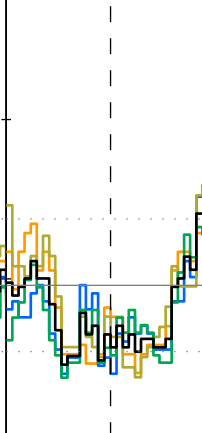

3 Tone [38,44]

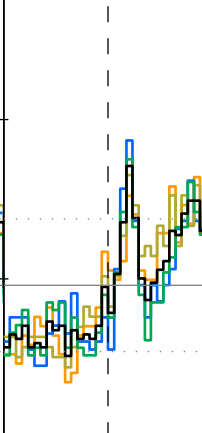

4 Go [82]

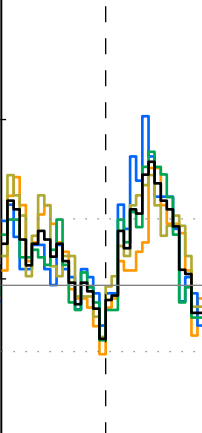

5 Choice [35,47]

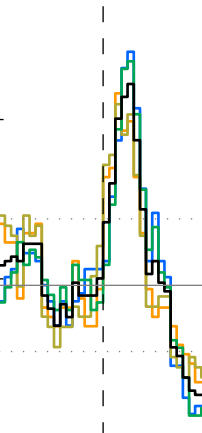

6 Side In [35,47]

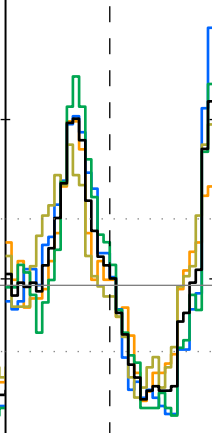

7 Nose Out [35,47]

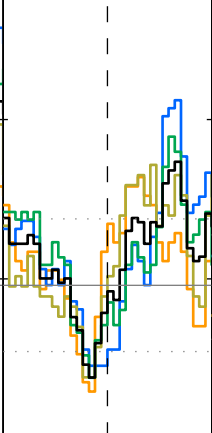

8 Reward [26,35]

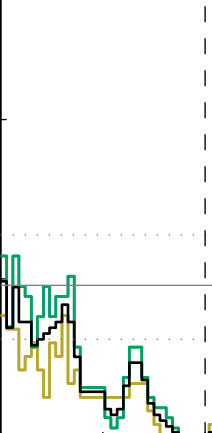

10

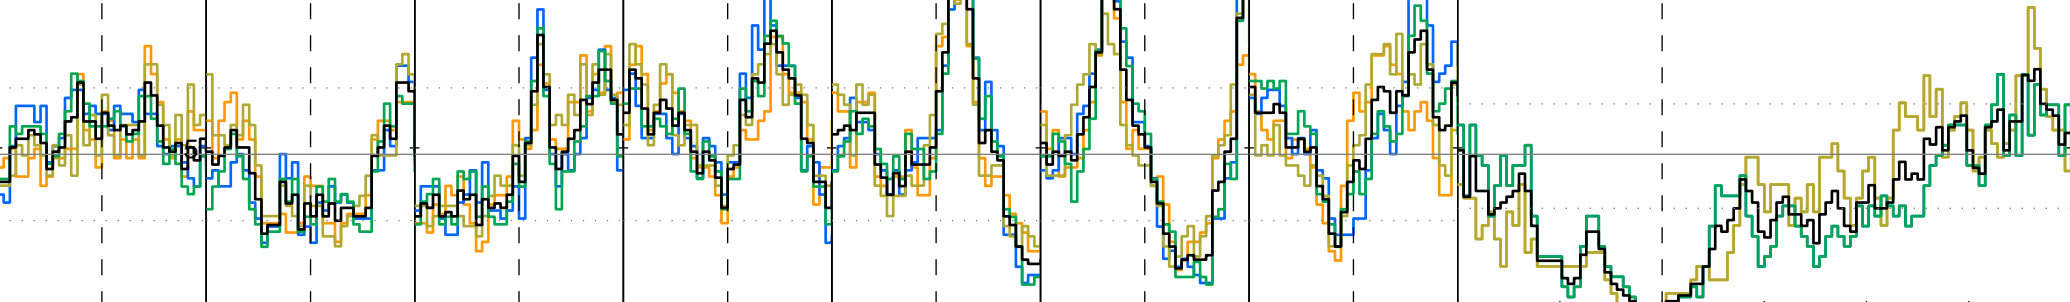

**Cell: C1220071127T05a**

AP: 1.4 ML: 2.1 DV: 8.3  
w: 3 n: 28407  $P_{ISI>2}$ : 0.011  
1/2pw: 510 $\mu$ s p->v: 448 $\mu$ s  
 $\beta_T$ : 2.7  $\beta_D$ : 2.7  
 $\beta_P$ : 3.1 SI: -0.4  
Session FR: 4.57 Hz  
Pk Ev: 6 - Side In (Tone2)  
Pk FR: 12.7Hz (0.15s) Inv

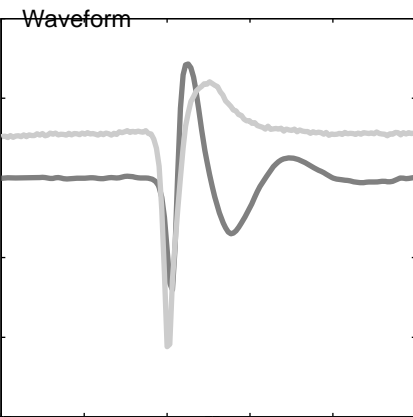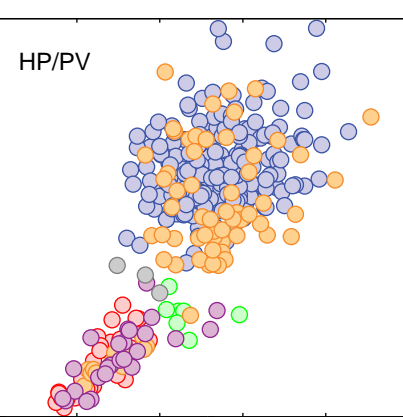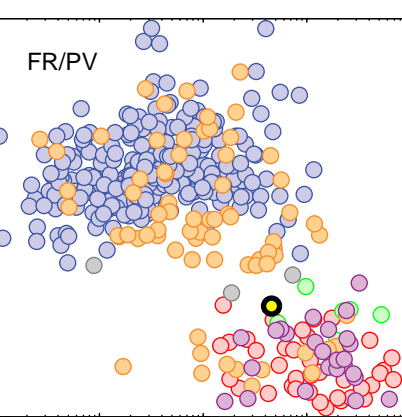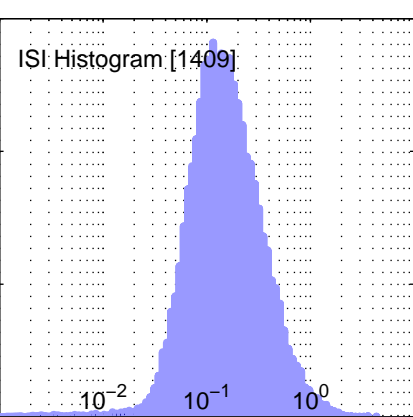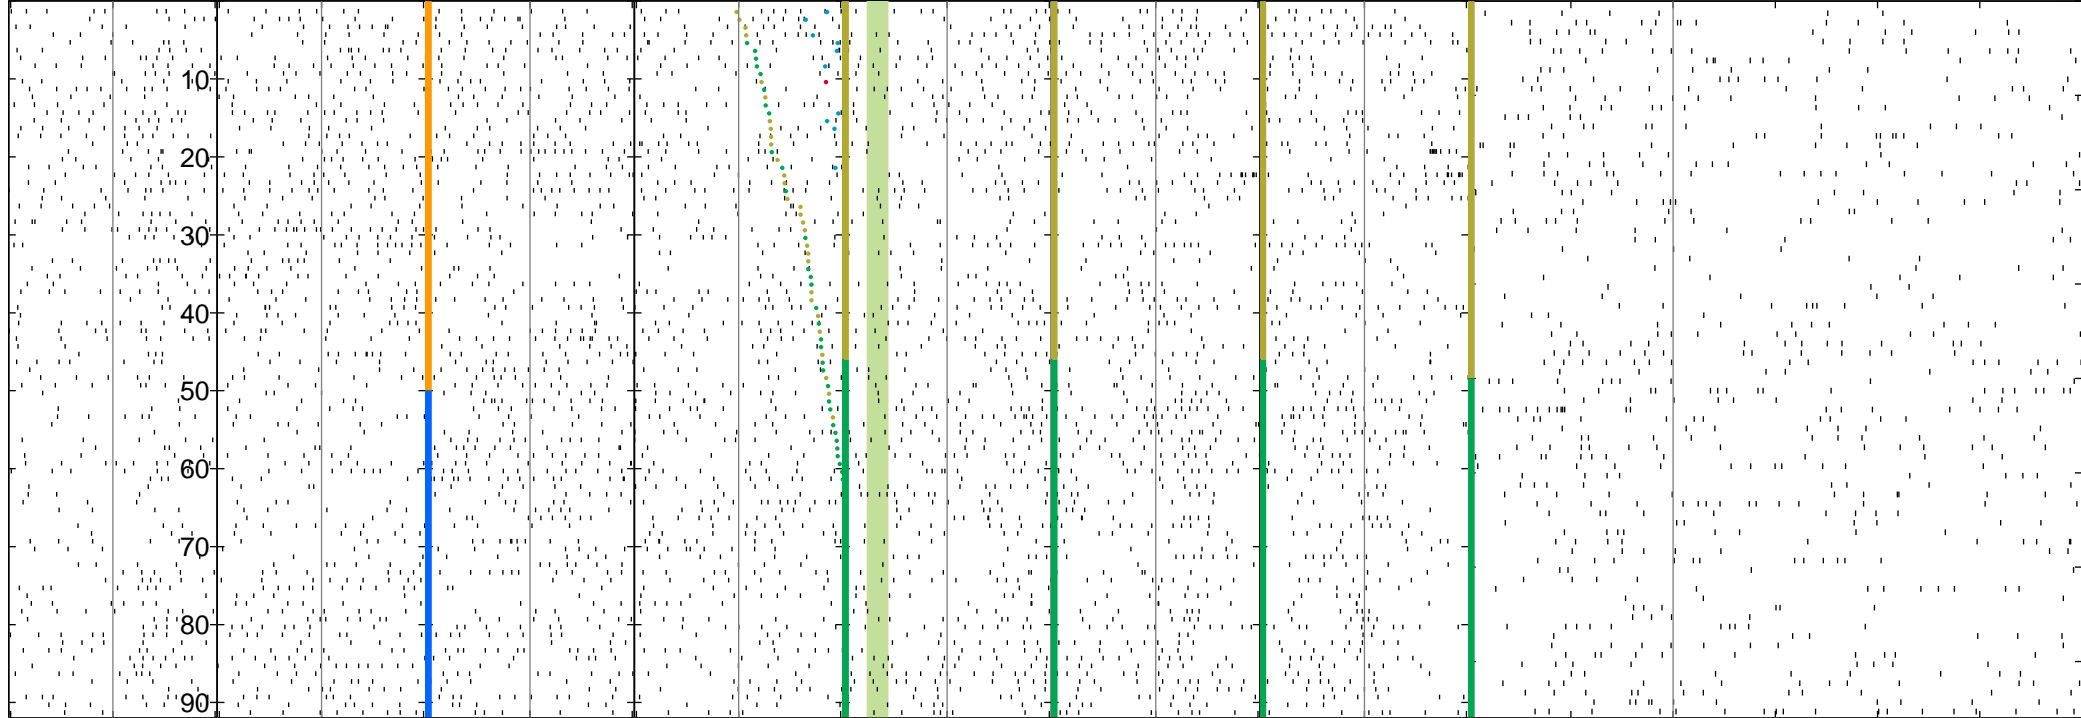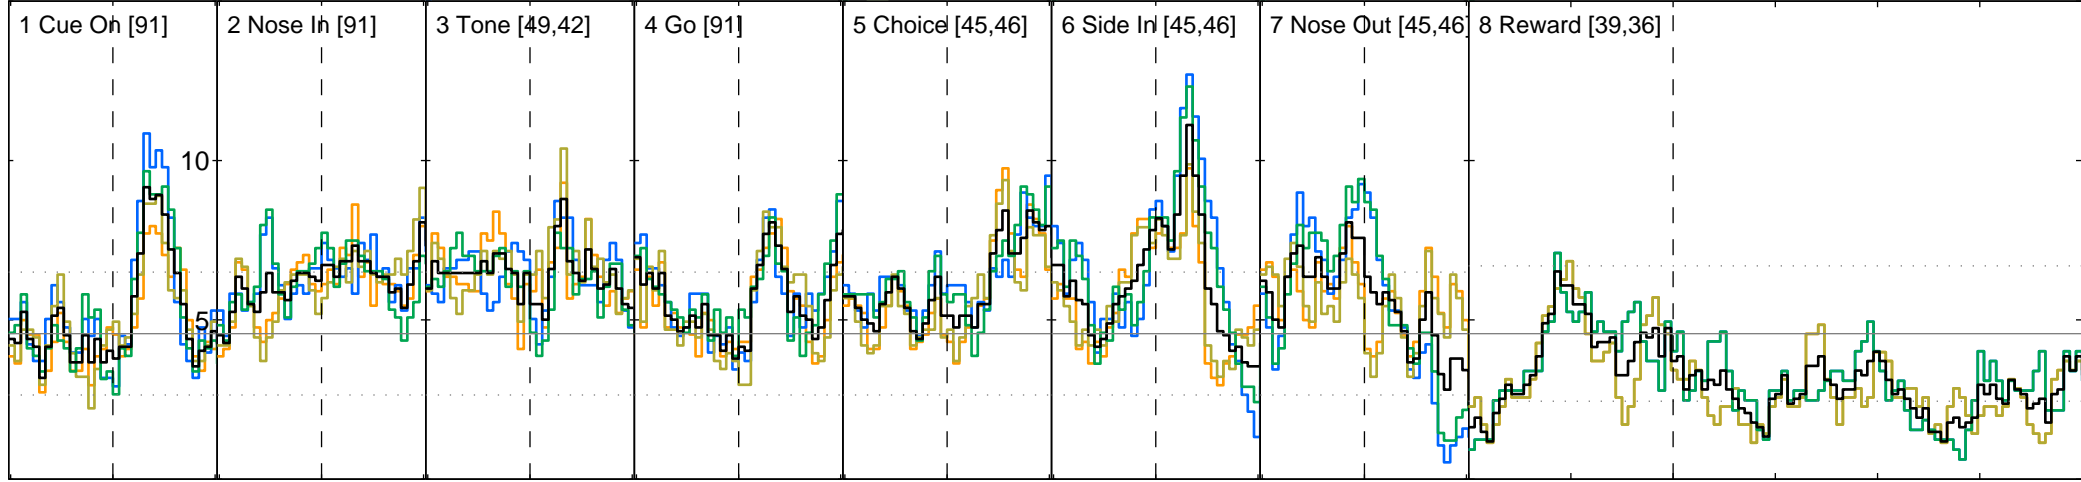



**Cell: C0320070613T09d**

AP: 1.6 ML: 3.7 DV: 4.7

w: 3 n: 4653  $P_{ISI>2}$ : 0.41

1/2pw: 0 $\mu$ s p->v: 0 $\mu$ s

$\beta_T$ : 2.4  $\beta_D$ : 2.9

$\beta_P$ : 2.9 SI: 0.71

Session FR: 1.66 Hz

Pk Ev: 6 - Side In (Ipsi)

Pk FR: 7.1Hz (0.57s) Inv

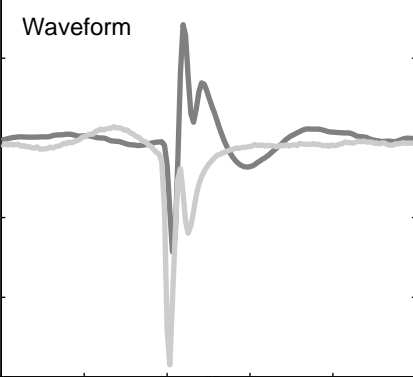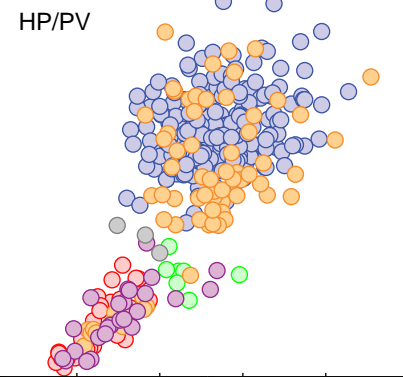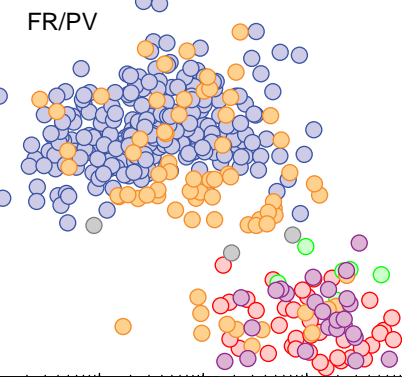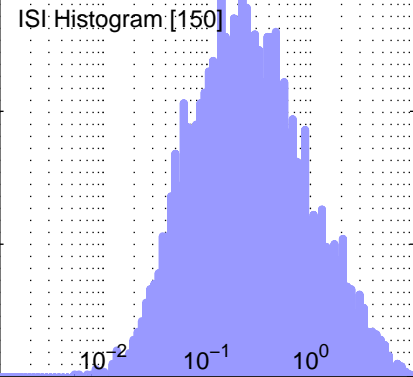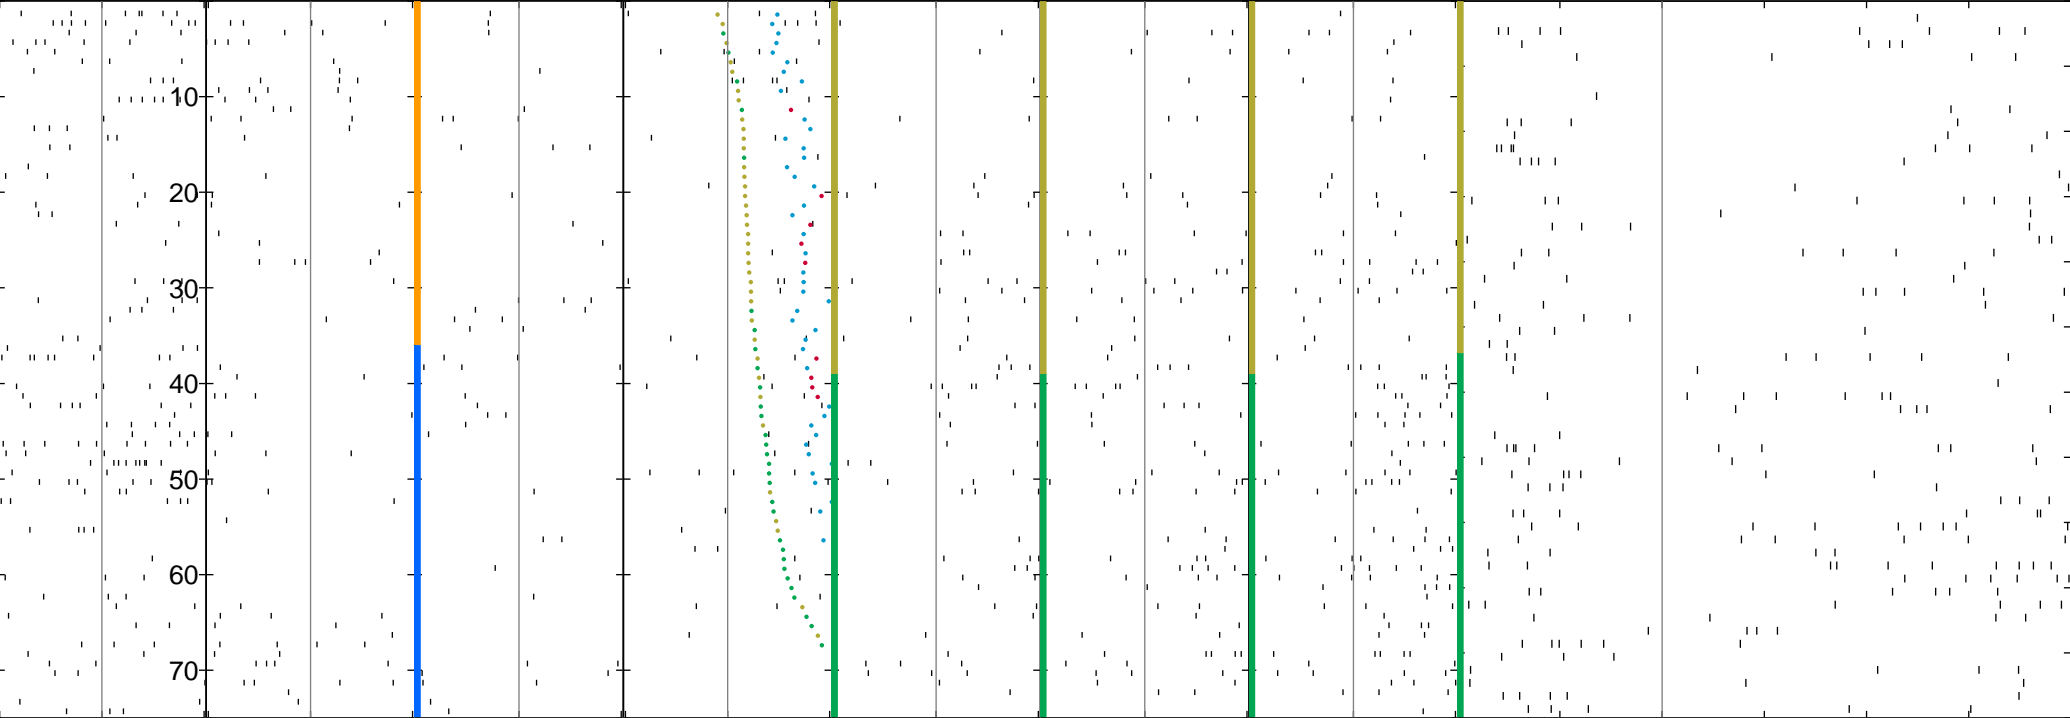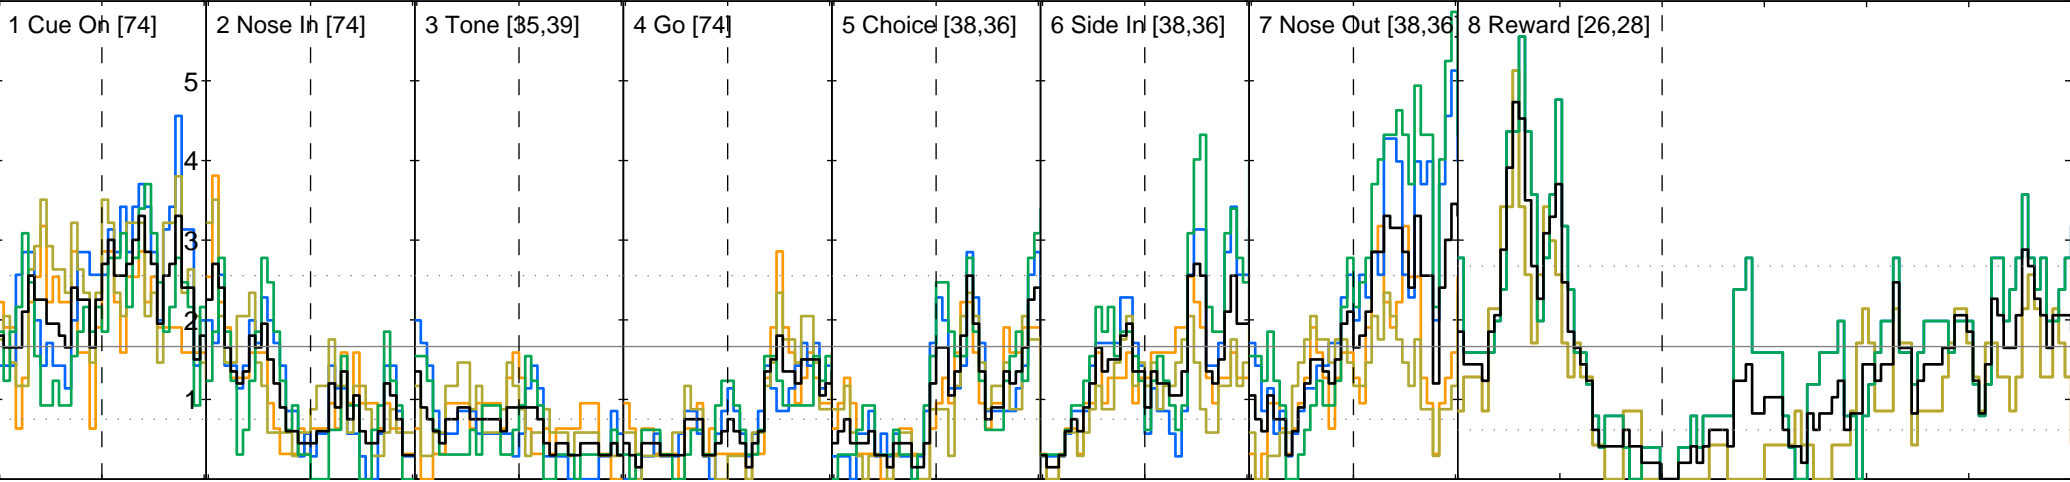

1 Cue On [74] 2 Nose In [74] 3 Tone [35,39] 4 Go [74] 5 Choice [38,36] 6 Side In [38,36] 7 Nose Out [38,36] 8 Reward [26,28]



**Cell: C0320070619T11c**

AP: -0.96 ML: 3.7 DV: 5.4

w: 4 n: 9052  $P_{ISI>2}$ : 0.281/2pw: 0 $\mu$ s p->v: 0 $\mu$ s $\beta_T$ : -2.7  $\beta_D$ : -1.9 $\beta_P$ : -3.5 SI: 0.22

Session FR: 2.13 Hz

Pk Ev: 6 - Side In (Ipsi)

Pk FR: 5.44Hz (1.23s) Inv

Waveform

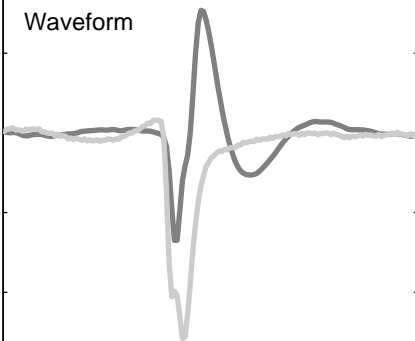

HP/PV

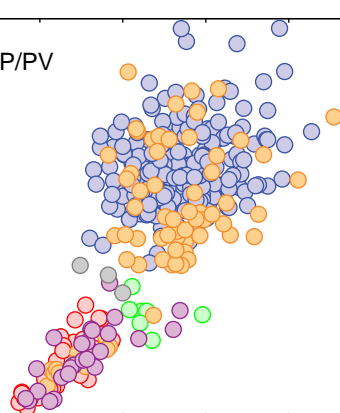

FR/PV

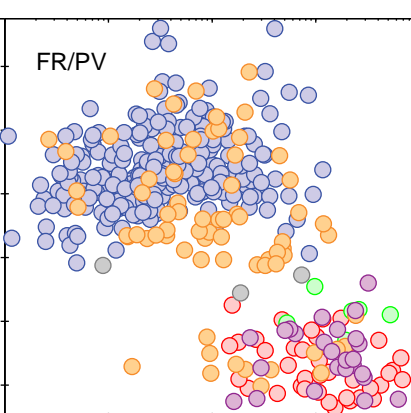

ISI Histogram [249]

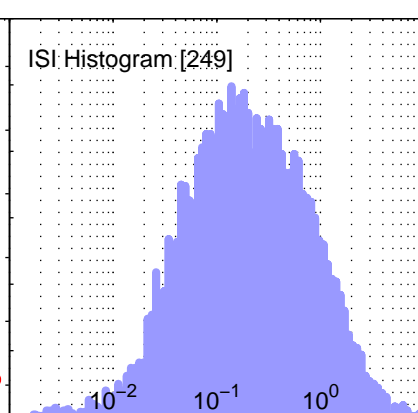10  
20  
30  
40  
50  
60  
70  
80  
90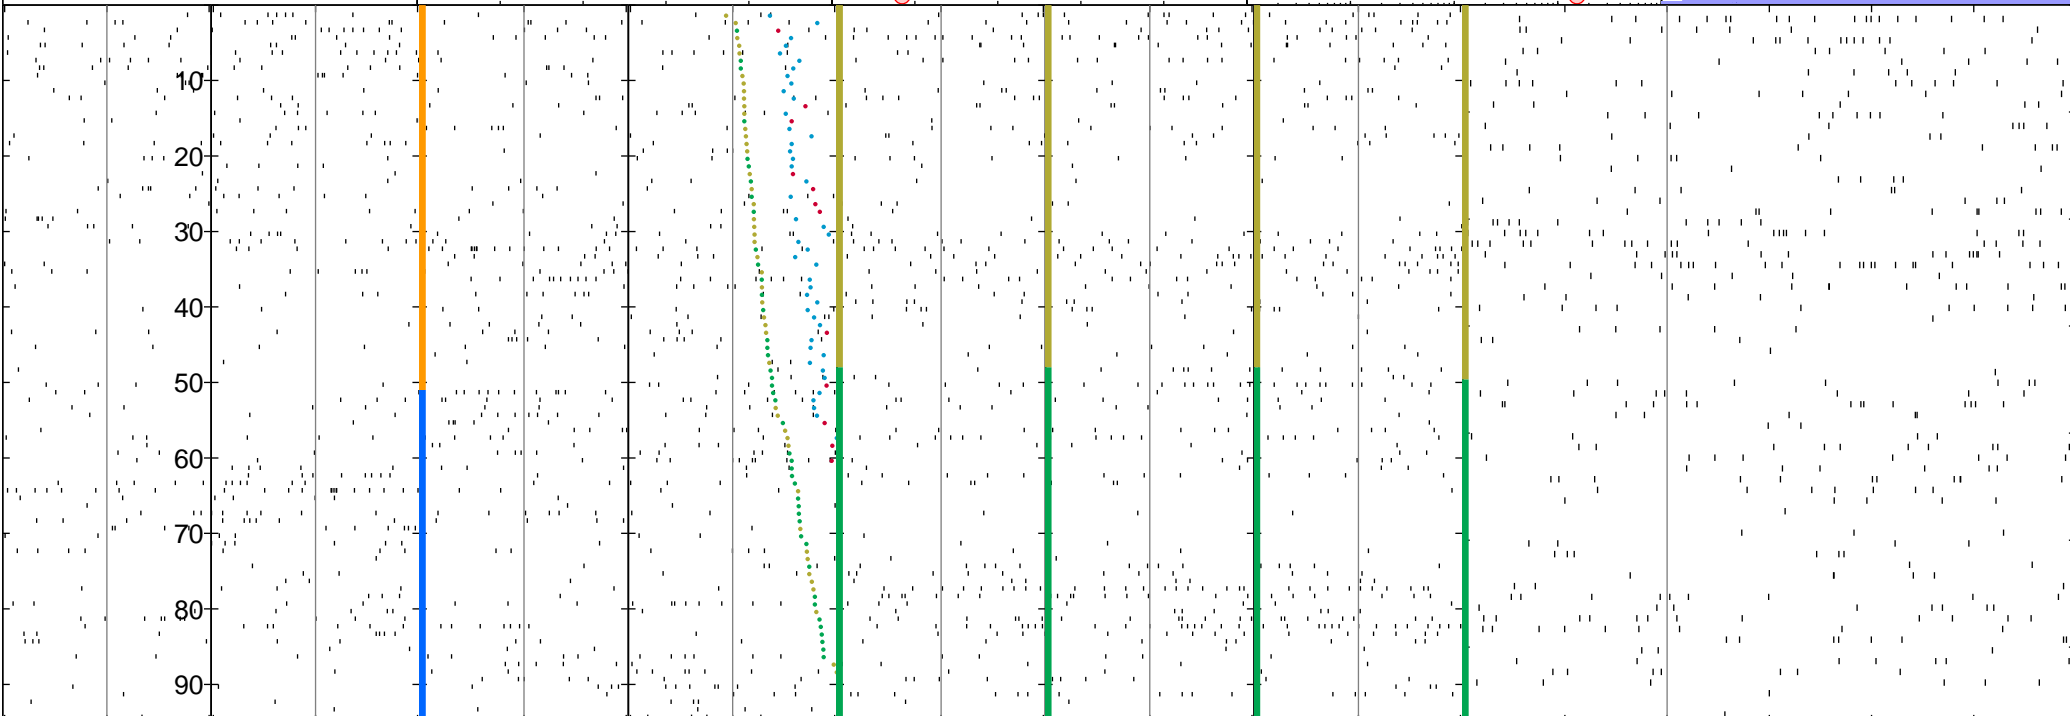

1 Cue On [94]

2 Nose In [94]

3 Tone [50,44]

4 Go [94]

5 Choice [47,47]

6 Side In [47,47]

7 Nose Out [47,47]

8 Reward [34,32]

5

4

3

2

1

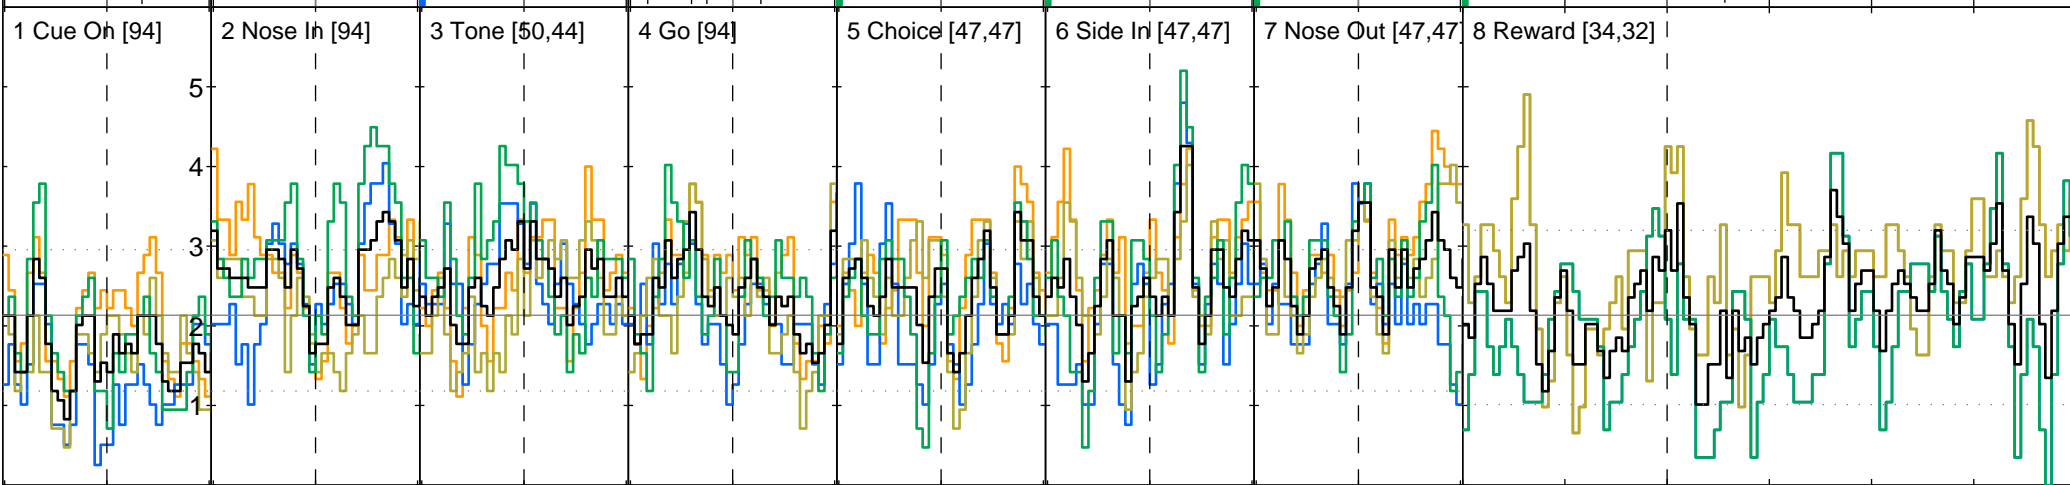

**Cell: C0320070611T09g**

AP: 1.6 ML: 3.7 DV: 4.7

w: 4 n: 35361  $P_{ISI>2}$ : 0.11/2pw: 93 $\mu$ s p $\rightarrow$ v: 243 $\mu$ s $\beta_T$ : -2.6  $\beta_D$ : -2.6 $\beta_P$ : 3.2 SI: 0.59

Session FR: 4.72 Hz

Pk Ev: 7 - Nose out (Contra)

Pk FR: 21.1Hz (0.93s) Inv

Waveform

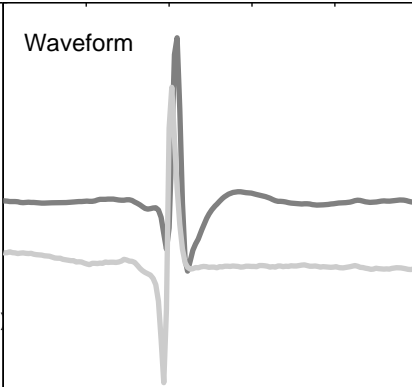

HP/PV

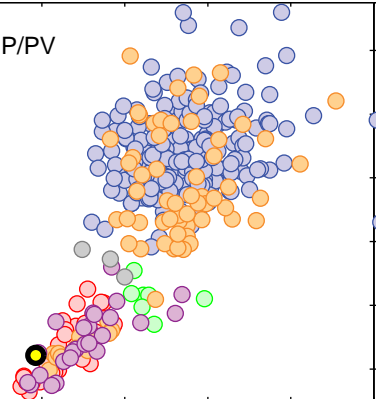

FR/PV

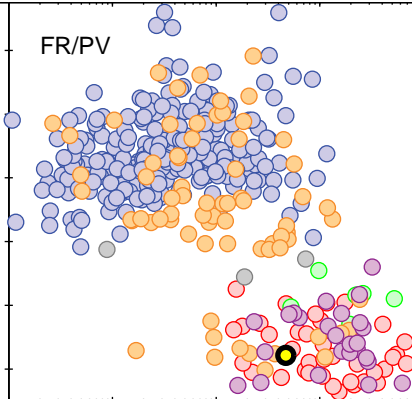

ISI Histogram [1330]

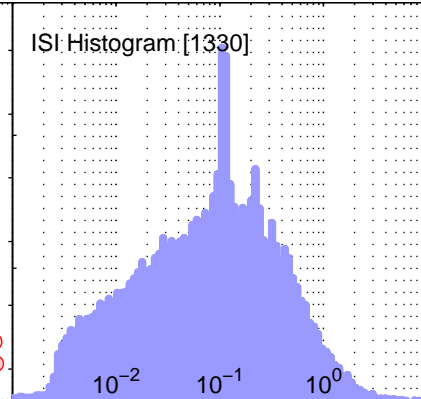

10

20

30

40

50

60

70

80

1 Cue On [85]

2 Nose In [85]

3 Tone [50,35]

4 Go [85]

5 Choice [39,46]

6 Side In [39,46]

7 Nose Out [39,46]

8 Reward [33,29]

15

10

5

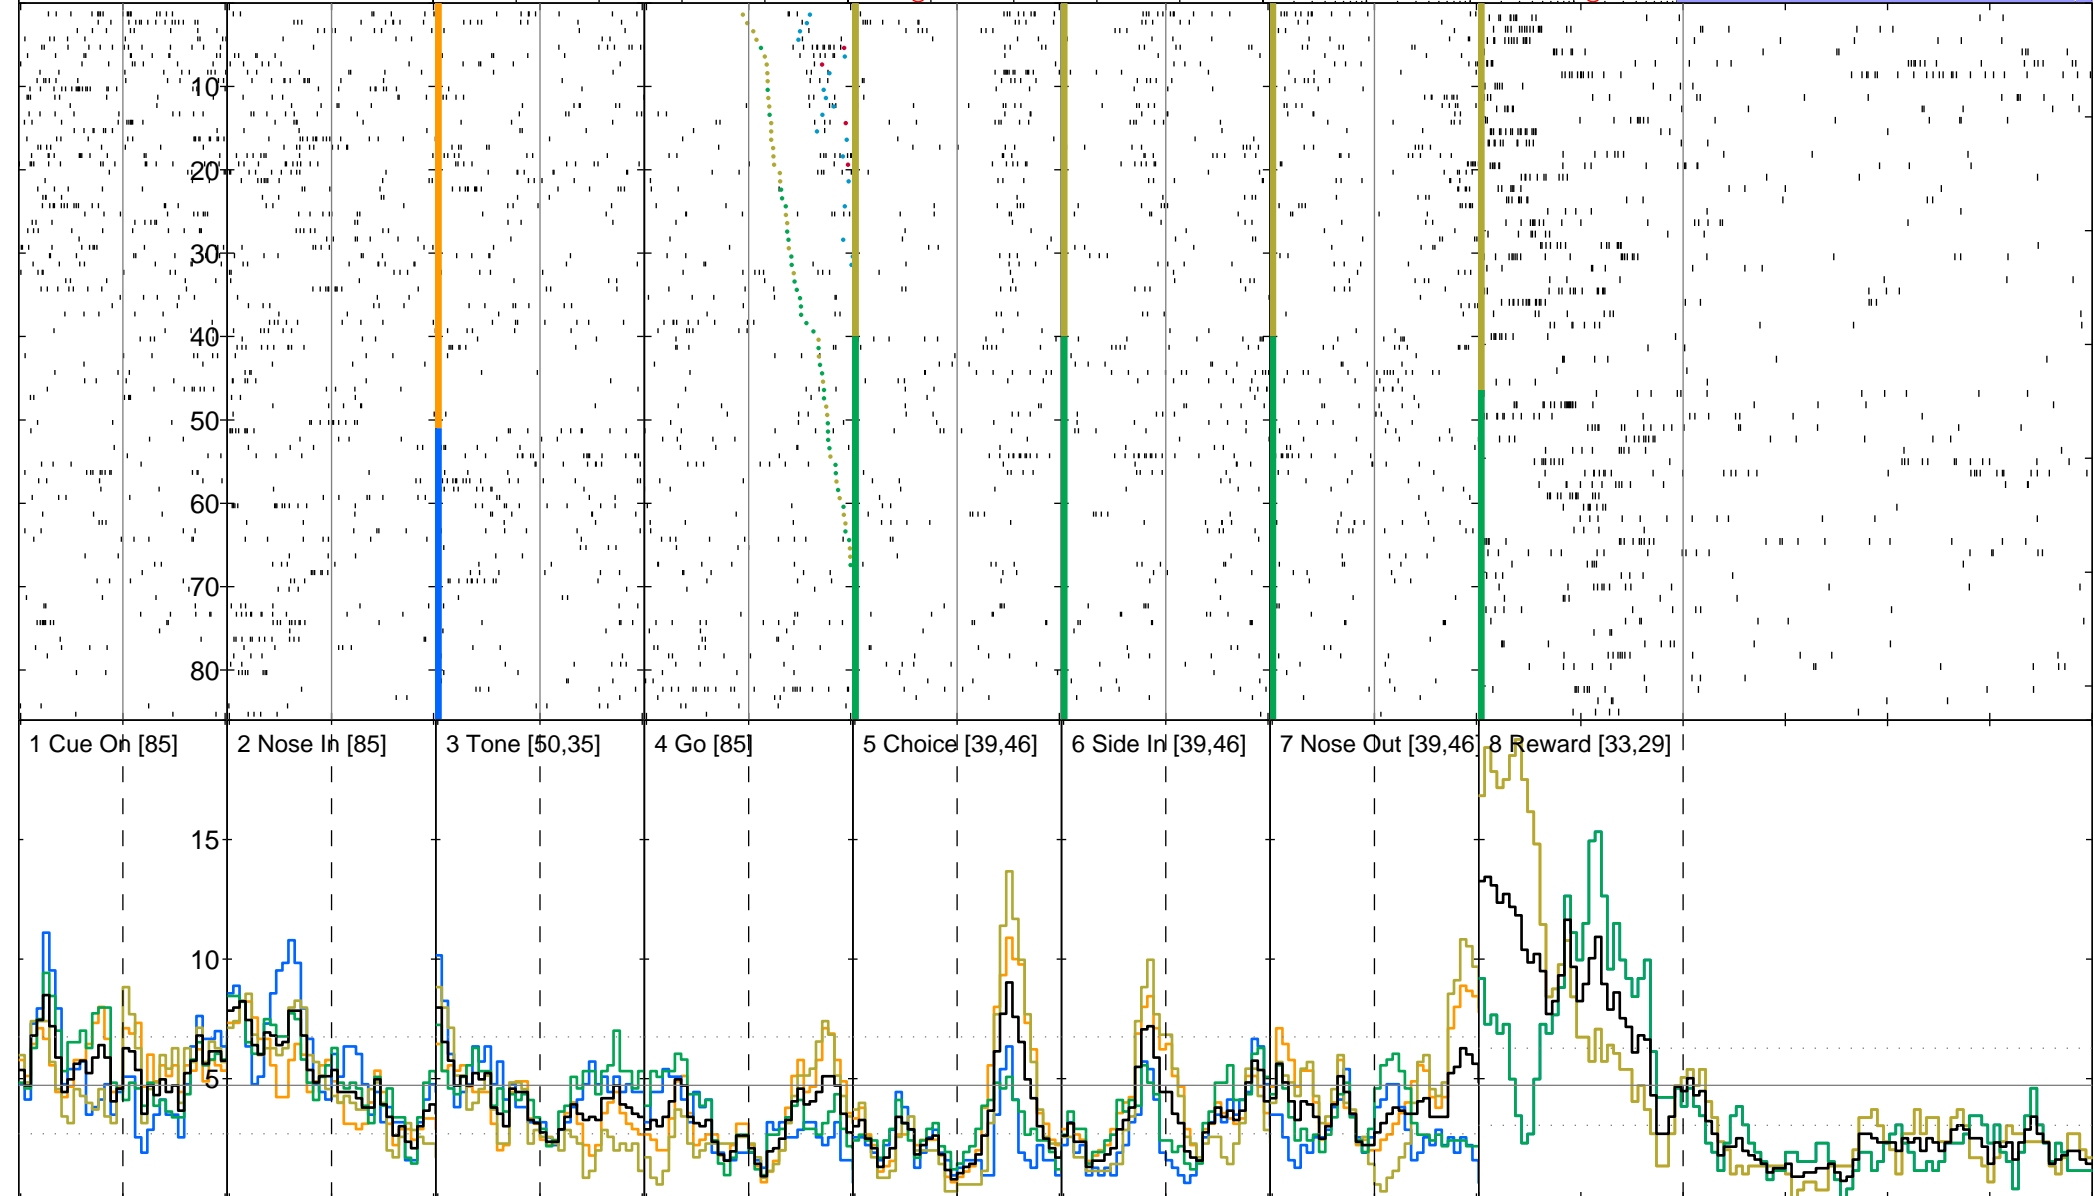

Cell: C1220071117T05b

AP: 1.4 ML: 2.1 DV: 7.5

w: 3 n: 548919  $P_{ISI>2}$ : 0.011

1/2pw: 0μs p->v: 0μs

$\beta_T$ : -2.1  $\beta_D$ : 3.2

$\beta_P$ : 4.6 SI: 0.33

Session FR: 53.5 Hz

Pk Ev: 8 - Reward (T2/Ipsi)

Pk FR: 68.2Hz (-0.79s) Inv

Waveform

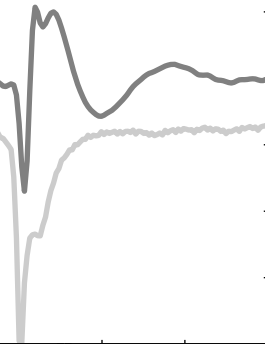

HP/PV

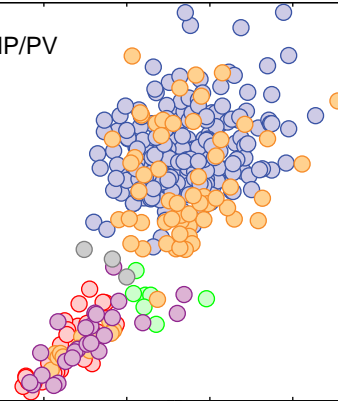

FR/PV

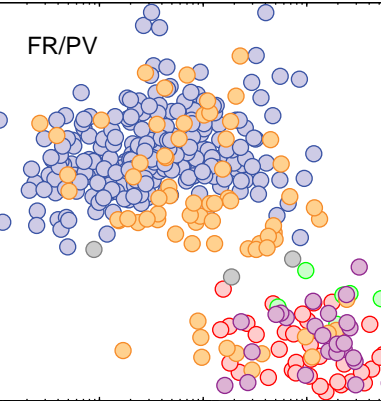

ISI Histogram [28015]

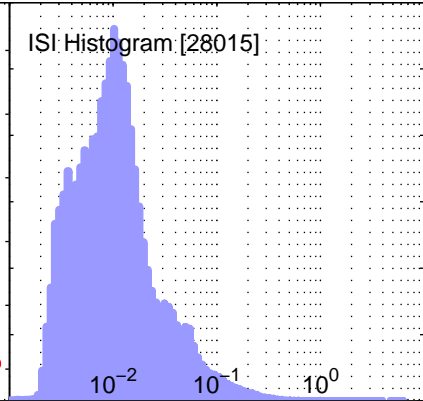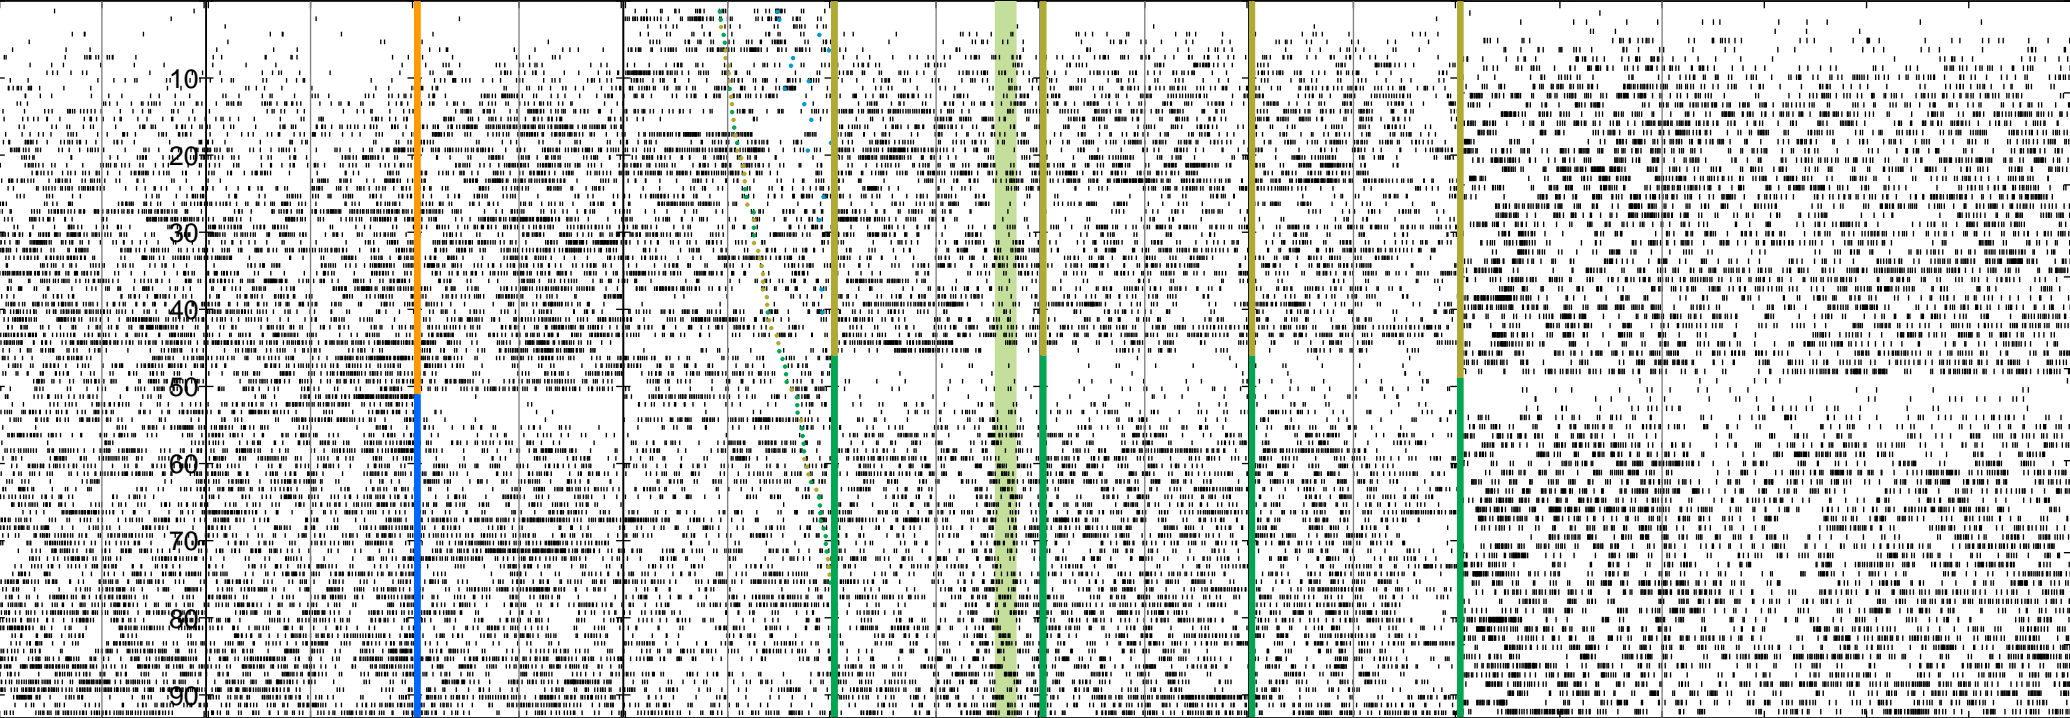

1 Cue On [92] 2 Nose In [92] 3 Tone [50,42] 4 Go [92] 5 Choice [45,47] 6 Side In [45,47] 7 Nose Out [45,47] 8 Reward [40,37]

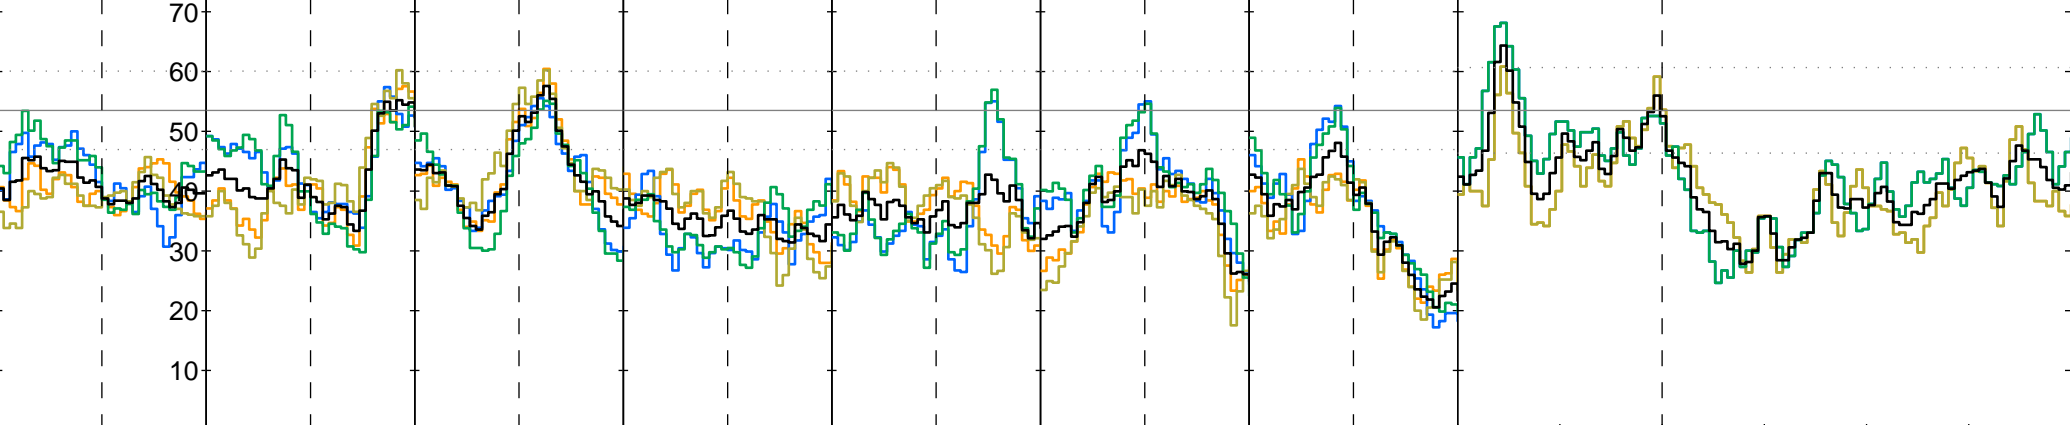

**Cell: C0520070406T06a**

AP: 1.9 ML: 1.5 DV: 8.1  
w: 2 n: 13952  $P_{ISI>2}$ : 0.13  
1/2pw: 112 $\mu$ s p->v: 347 $\mu$ s  
 $\beta_T$ : -3.6  $\beta_D$ : 2.6  
 $\beta_P$ : -2.8 SI: 0.34  
Session FR: 3.2 Hz  
Pk Ev: 8 - Reward (T1/Con)  
Pk FR: 11.7Hz (-0.61s) Inv

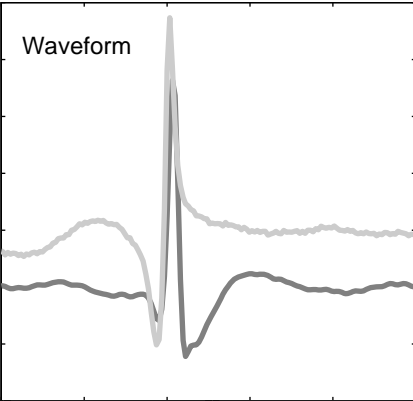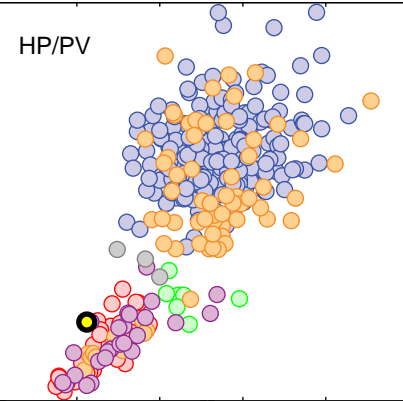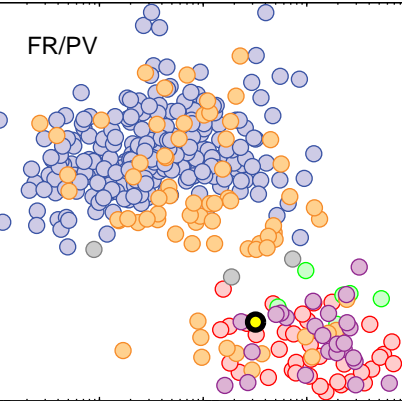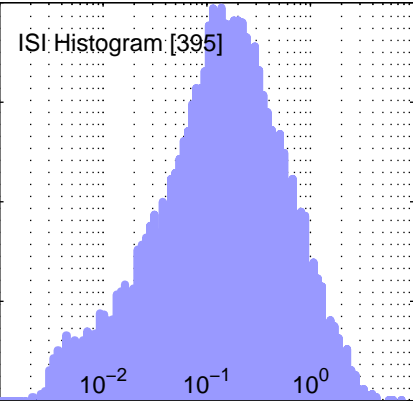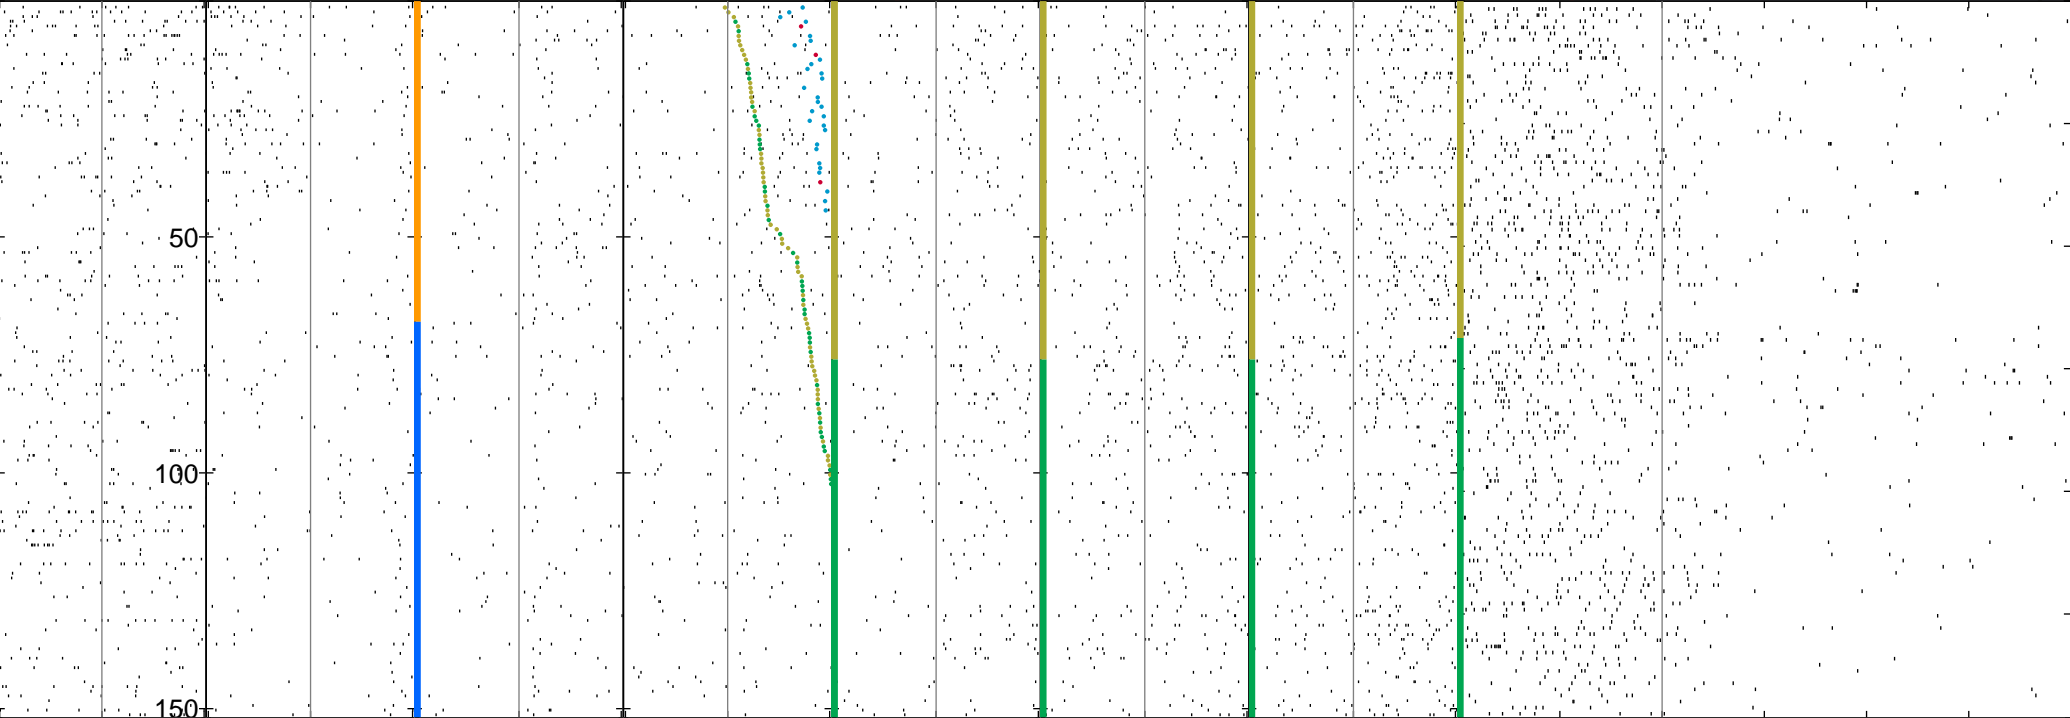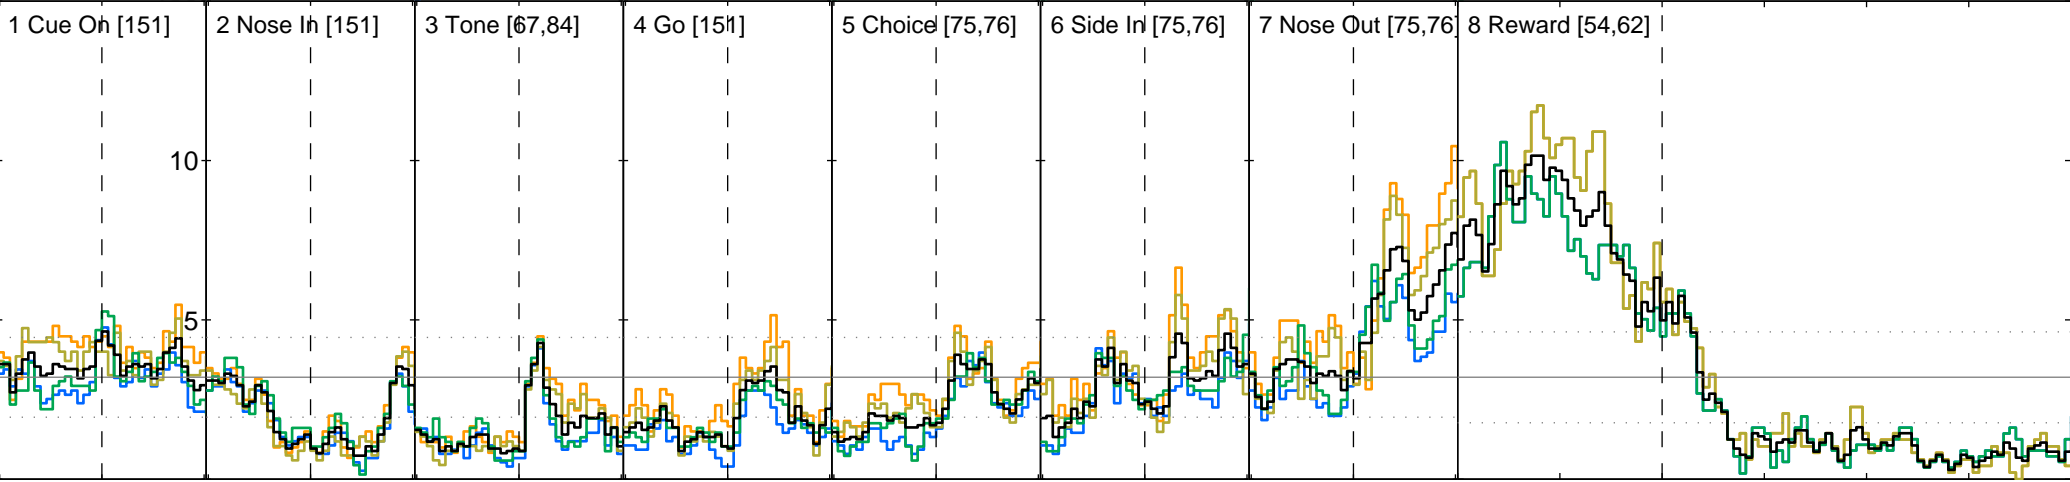

**Cell: C0320070613T15a**

AP: -2.3 ML: 4.6 DV: 6.2

w: 1 n: 32229  $P_{ISI>2}$ : 0.111/2pw: 0 $\mu$ s p->v: 0 $\mu$ s $\beta_T$ : 1.8  $\beta_D$ : 2.3 $\beta_P$ : -4.4 SI: 0.55

Session FR: 9.56 Hz

Pk Ev: 8 - Reward (T1/Con)

Pk FR: 17.6Hz (-0.52s) Inv

Waveform

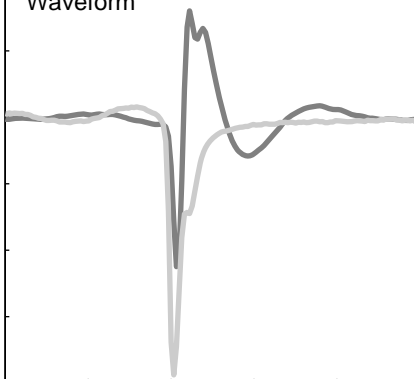

HP/PV

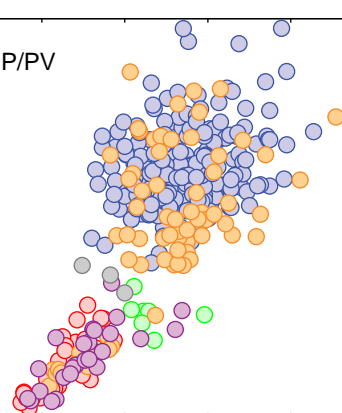

FR/PV

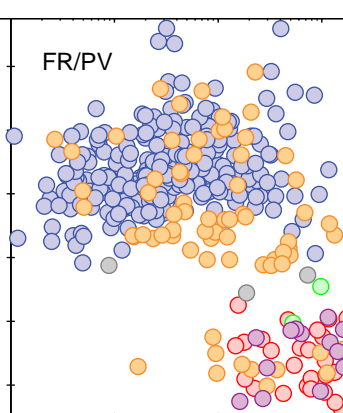

ISI Histogram [2143]

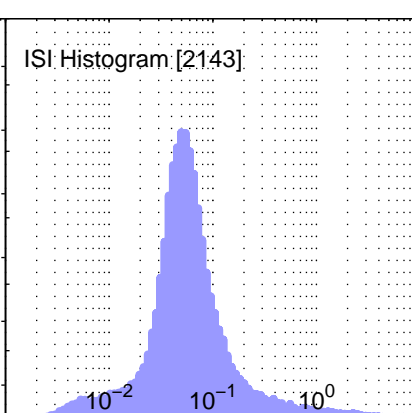

10

20

30

40

50

60

70

80

90

15

10

5

1 Cue On [89]

2 Nose In [89]

3 Tone [47,42]

4 Go [89]

5 Choice [39,50]

6 Side In [39,50]

7 Nose Out [39,50]

8 Reward [29,36]

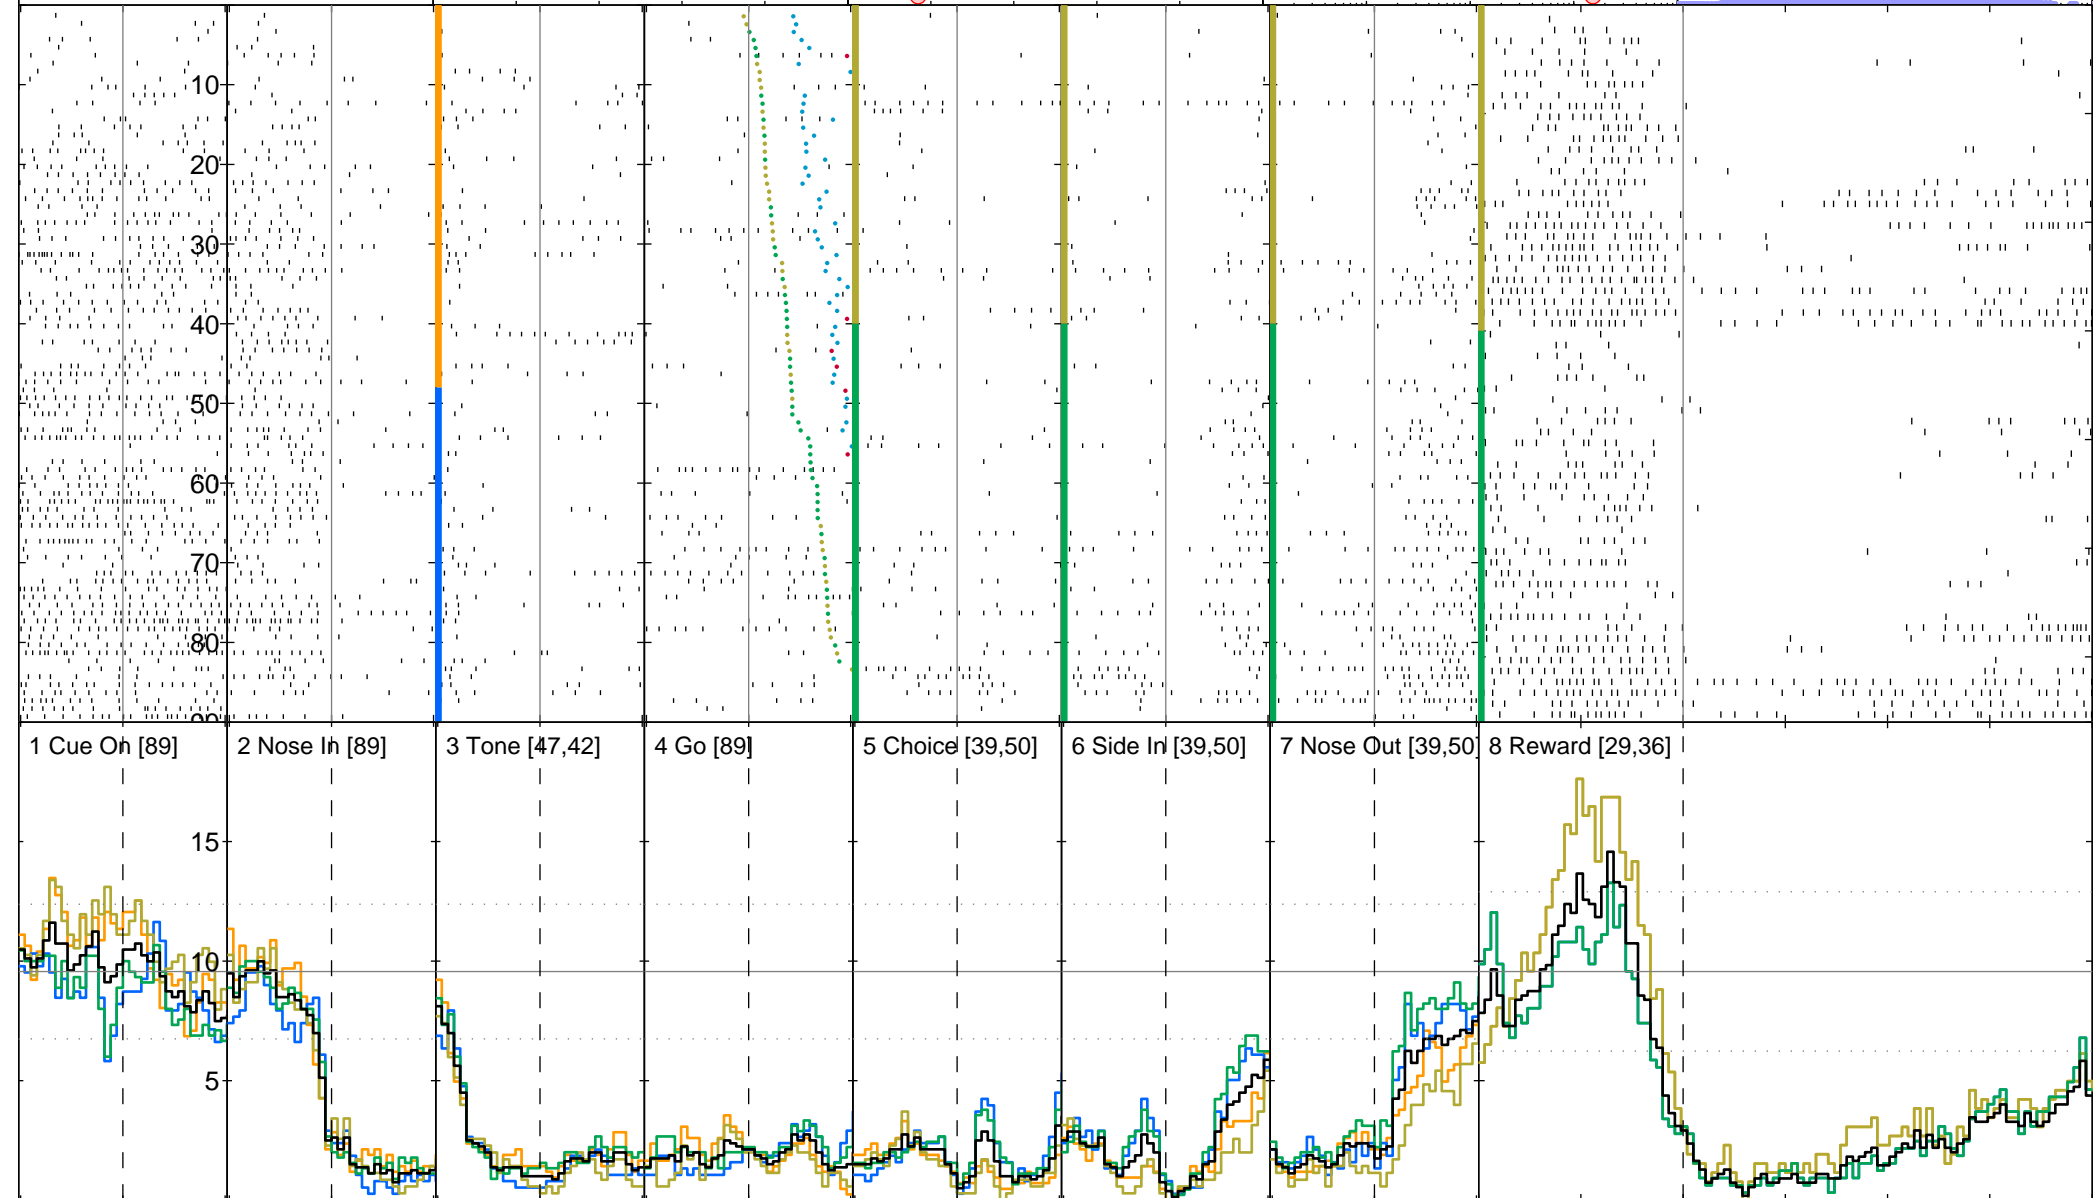

**Cell: C0320070613T09F**

AP: 1.6 ML: 3.7 DV: 4.7

w: 3 n: 9771  $P_{ISI>2}$ : 0.0431/2pw: 131 $\mu$ s p->v: 802 $\mu$ s $\beta_T$ : -2.6  $\beta_D$ : 2.8 $\beta_P$ : 2.1 SI: -0.58

Session FR: 3.49 Hz

Pk Ev: 8 - Reward (T1/Con)

Pk FR: 9.4Hz (-0.34s) Inv

Waveform

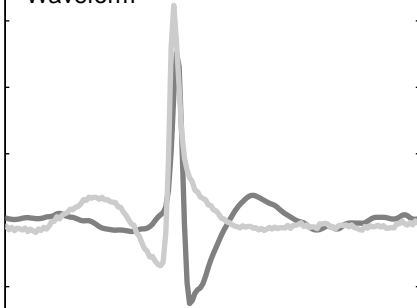

HP/PV

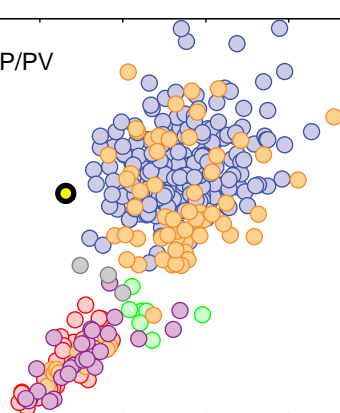

FR/PV

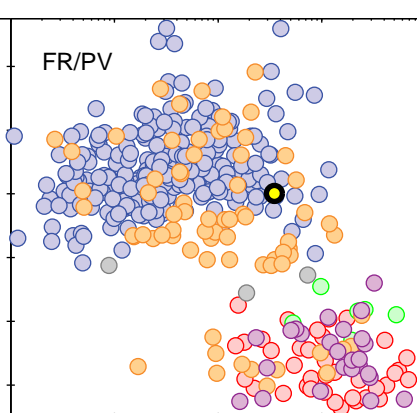

ISI Histogram [321]

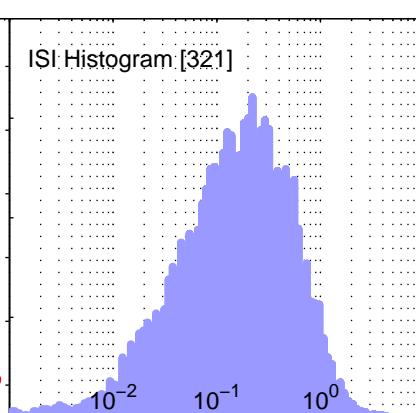

10

20

30

40

50

60

70

1 Cue On [74]

2 Nose In [74]

3 Tone [35,39]

4 Go [74]

5 Choice [38,36]

6 Side In [38,36]

7 Nose Out [38,36]

8 Reward [26,28]

8

6

4

2

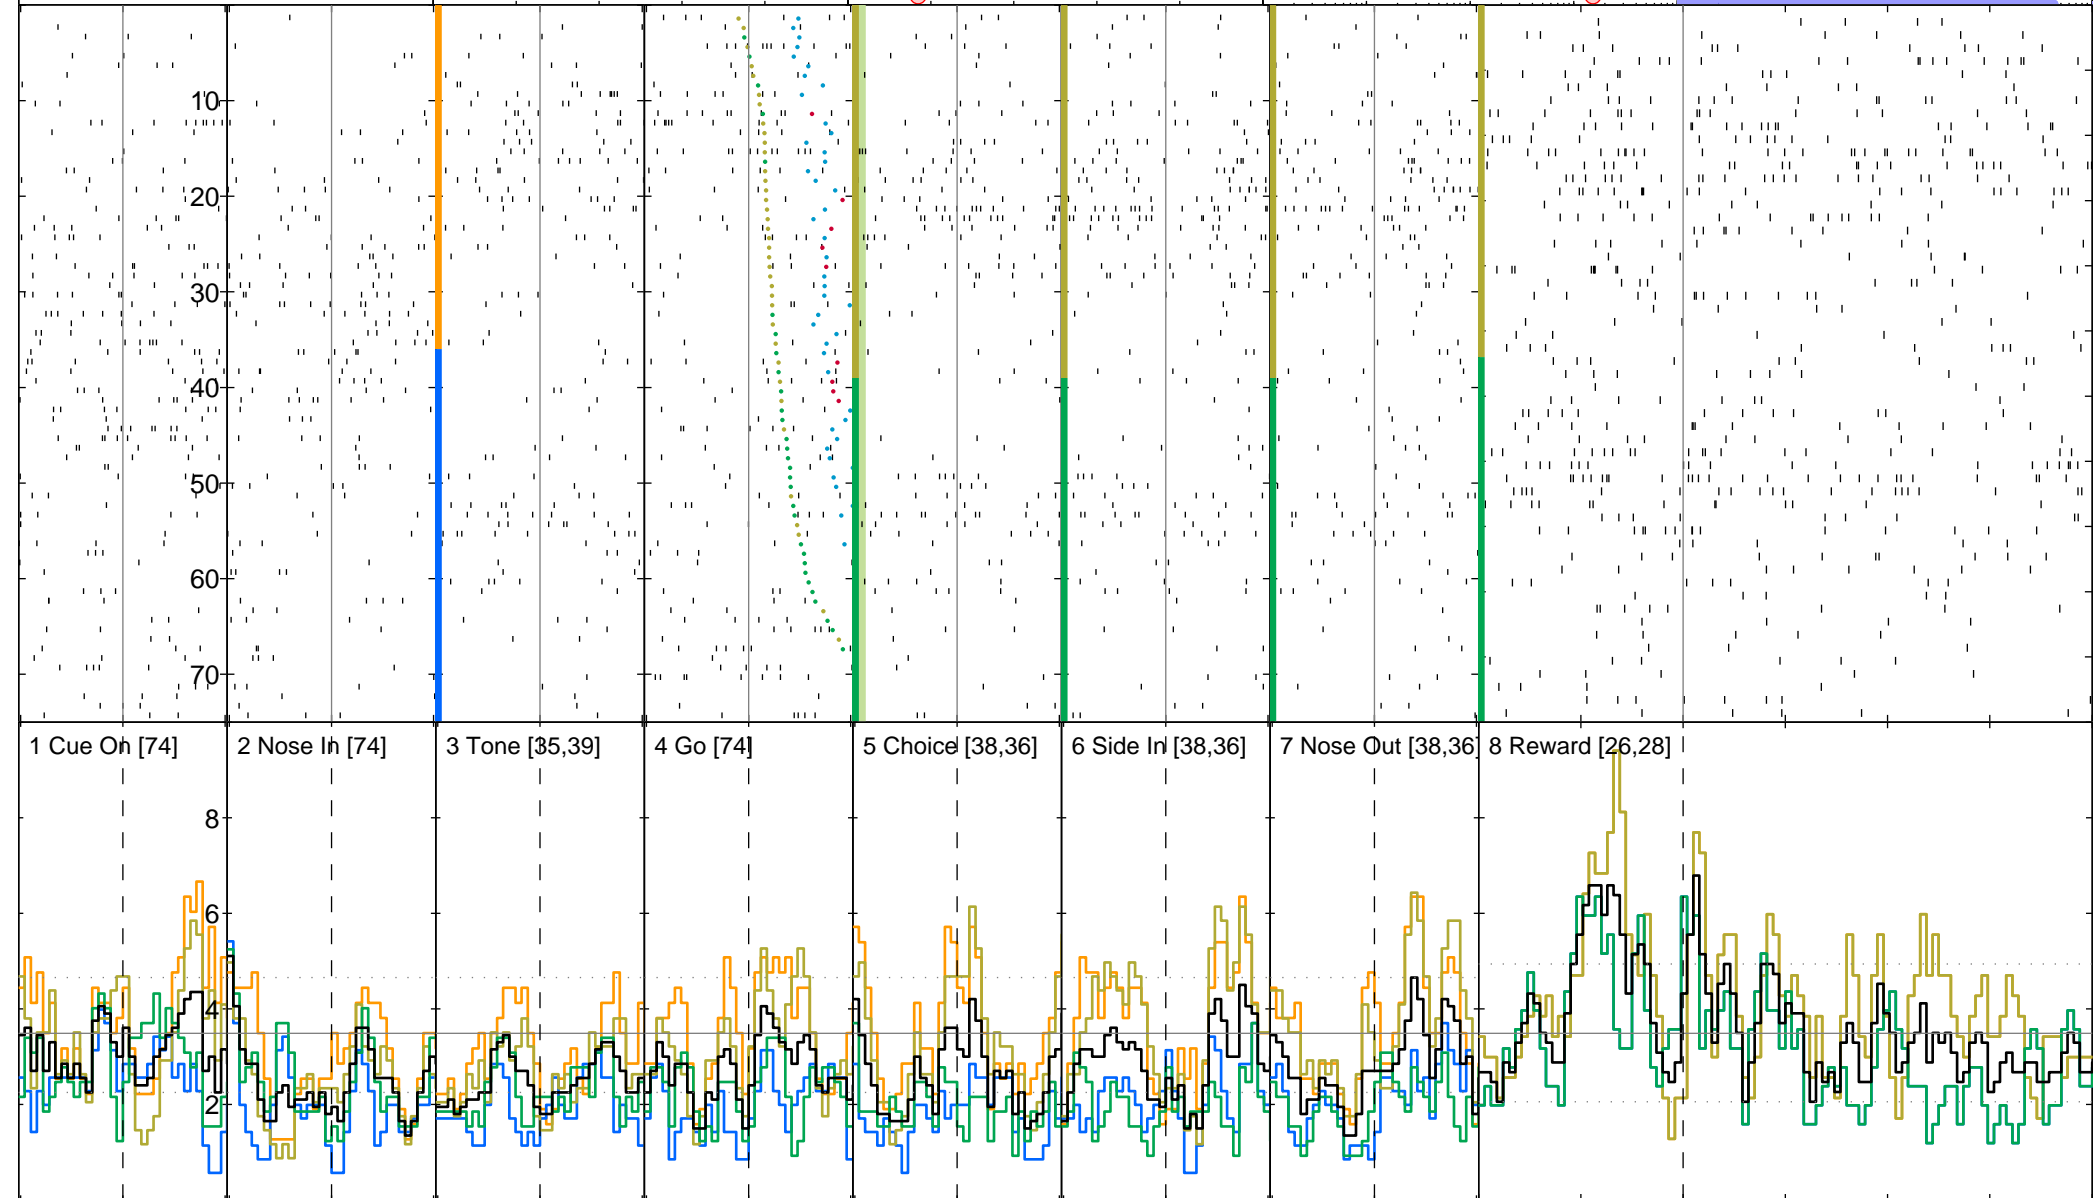

Cell: C0320070702T07c

AP: 0.96 ML: 3.6 DV: 7.8

w: 4 n: 13709  $P_{ISI>2}$ : 0.029

1/2pw: 282 $\mu$ s p->v: 678 $\mu$ s

$\beta_T$ : 2.7  $\beta_D$ : -3.1

$\beta_P$ : 2.9 SI: 0.27

Session FR: 2.73 Hz

Pk Ev: 8 - Reward (T1/Con)

Pk FR: 7.22Hz (0.26s) Inv

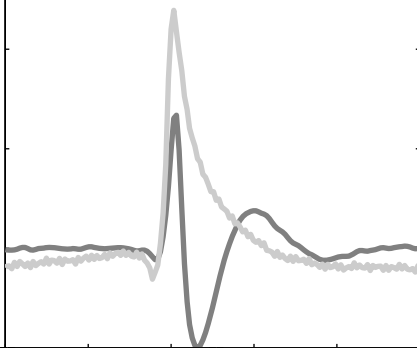

HP/PV

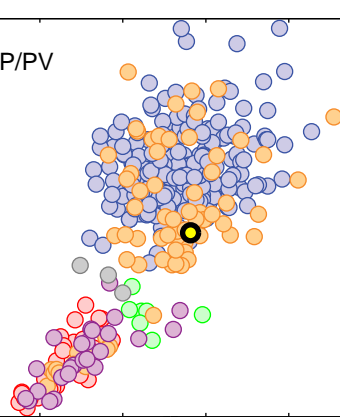

FR/PV

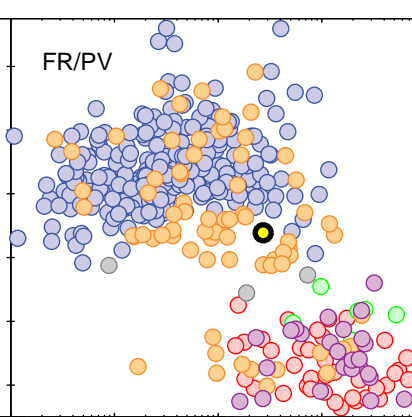

ISI Histogram [517]

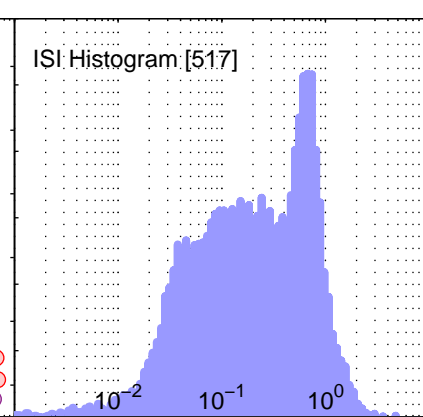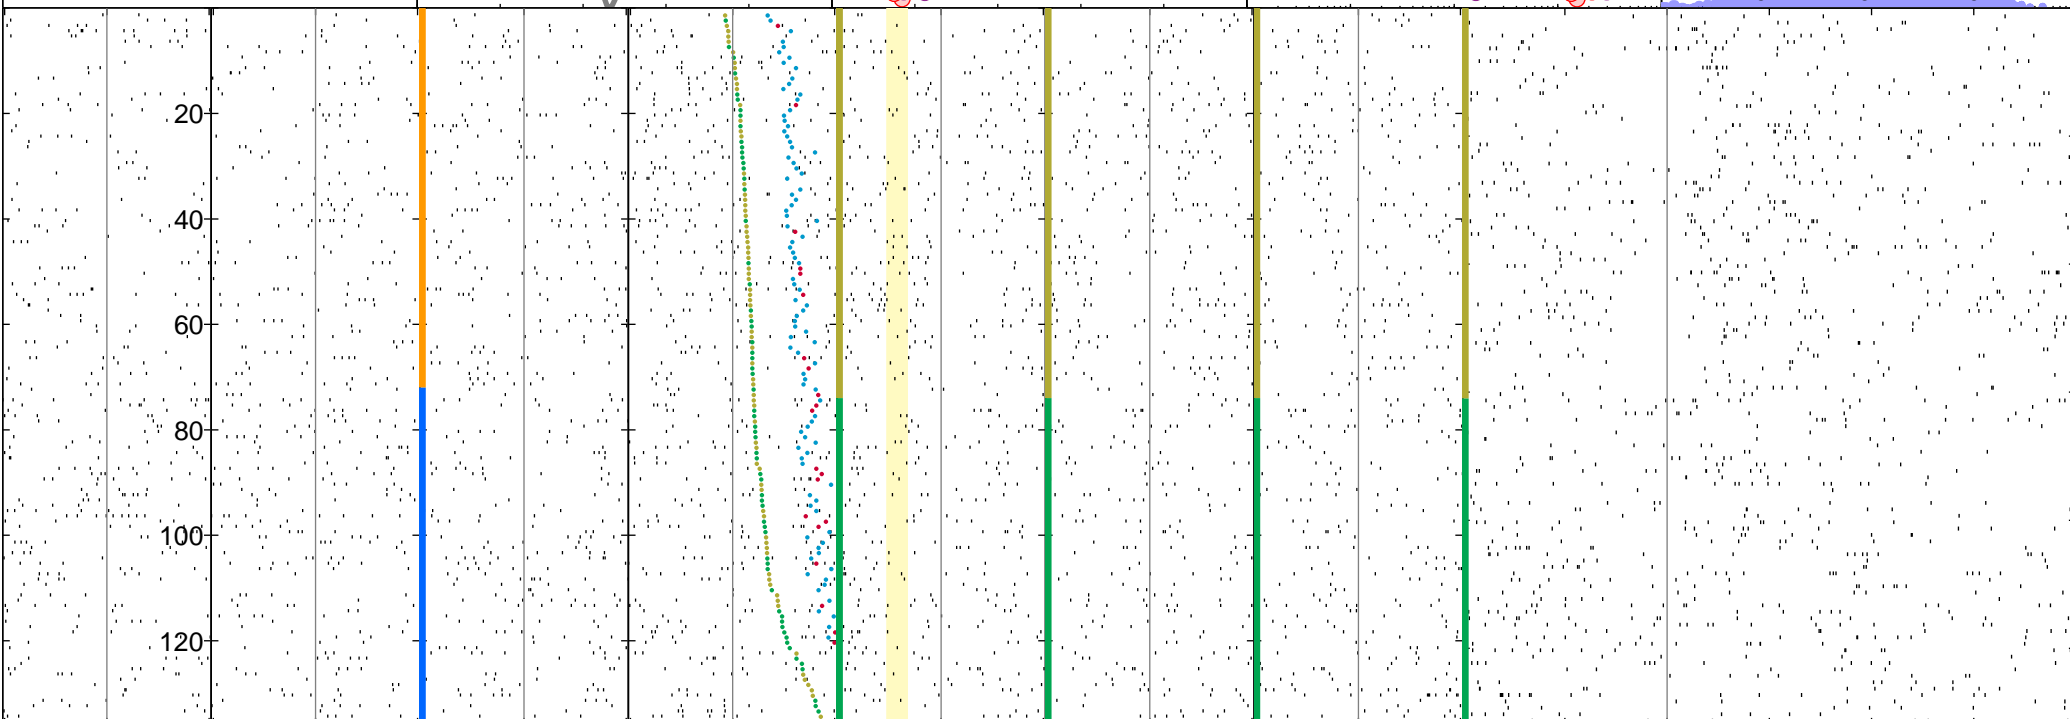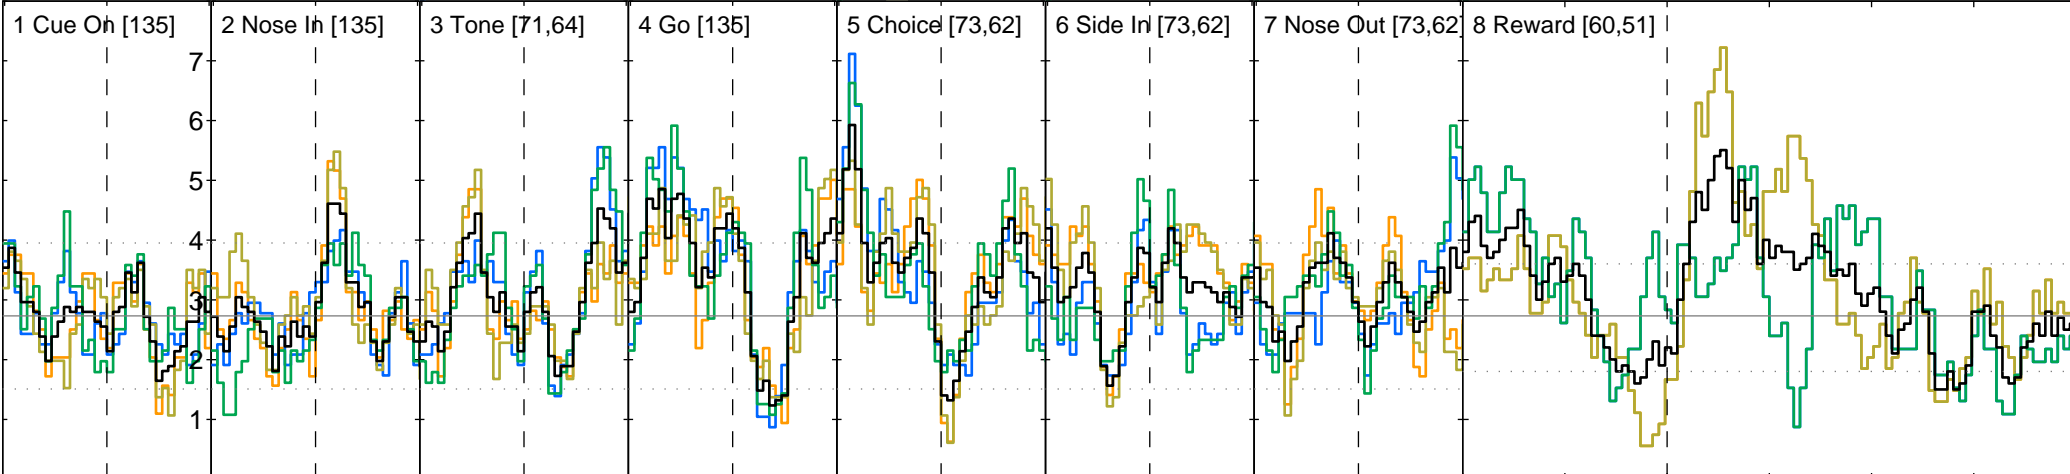



**Cell: C1220071125T05b**

AP: 1.4 ML: 2.1 DV: 8

w: 3 n: 9601  $P_{ISI>2}$ : 0.461/2pw: 166 $\mu$ s p->v: 283 $\mu$ s $\beta_T$ : -2  $\beta_D$ : 2.9 $\beta_P$ : -3.2 SI: NaN

Session FR: 1.67 Hz

Pk Ev: 8 - Reward (T2/Ipsi)

Pk FR: 6.98Hz (0.29s) Inv

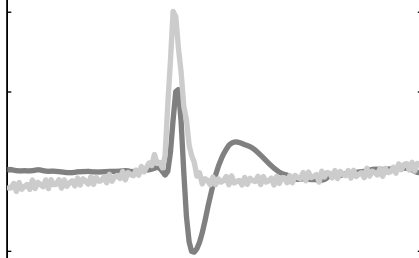

HP/PV

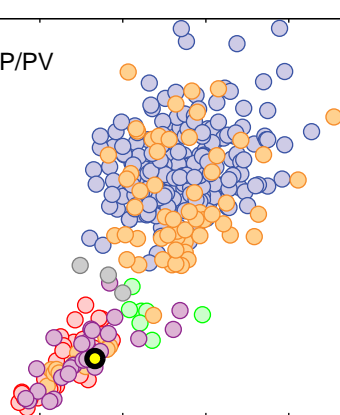

FR/PV

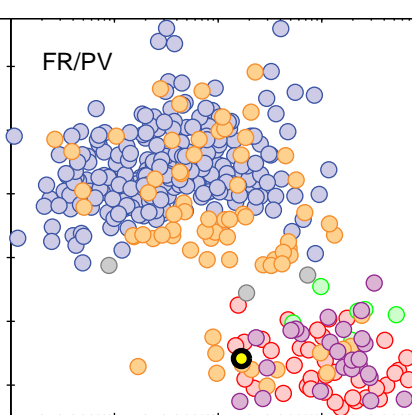

ISI Histogram [243]

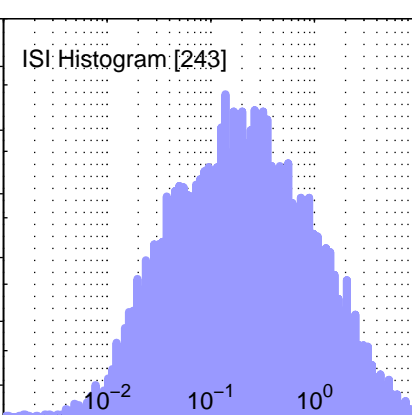10  
20  
30  
40  
50  
60  
70  
80  
90  
100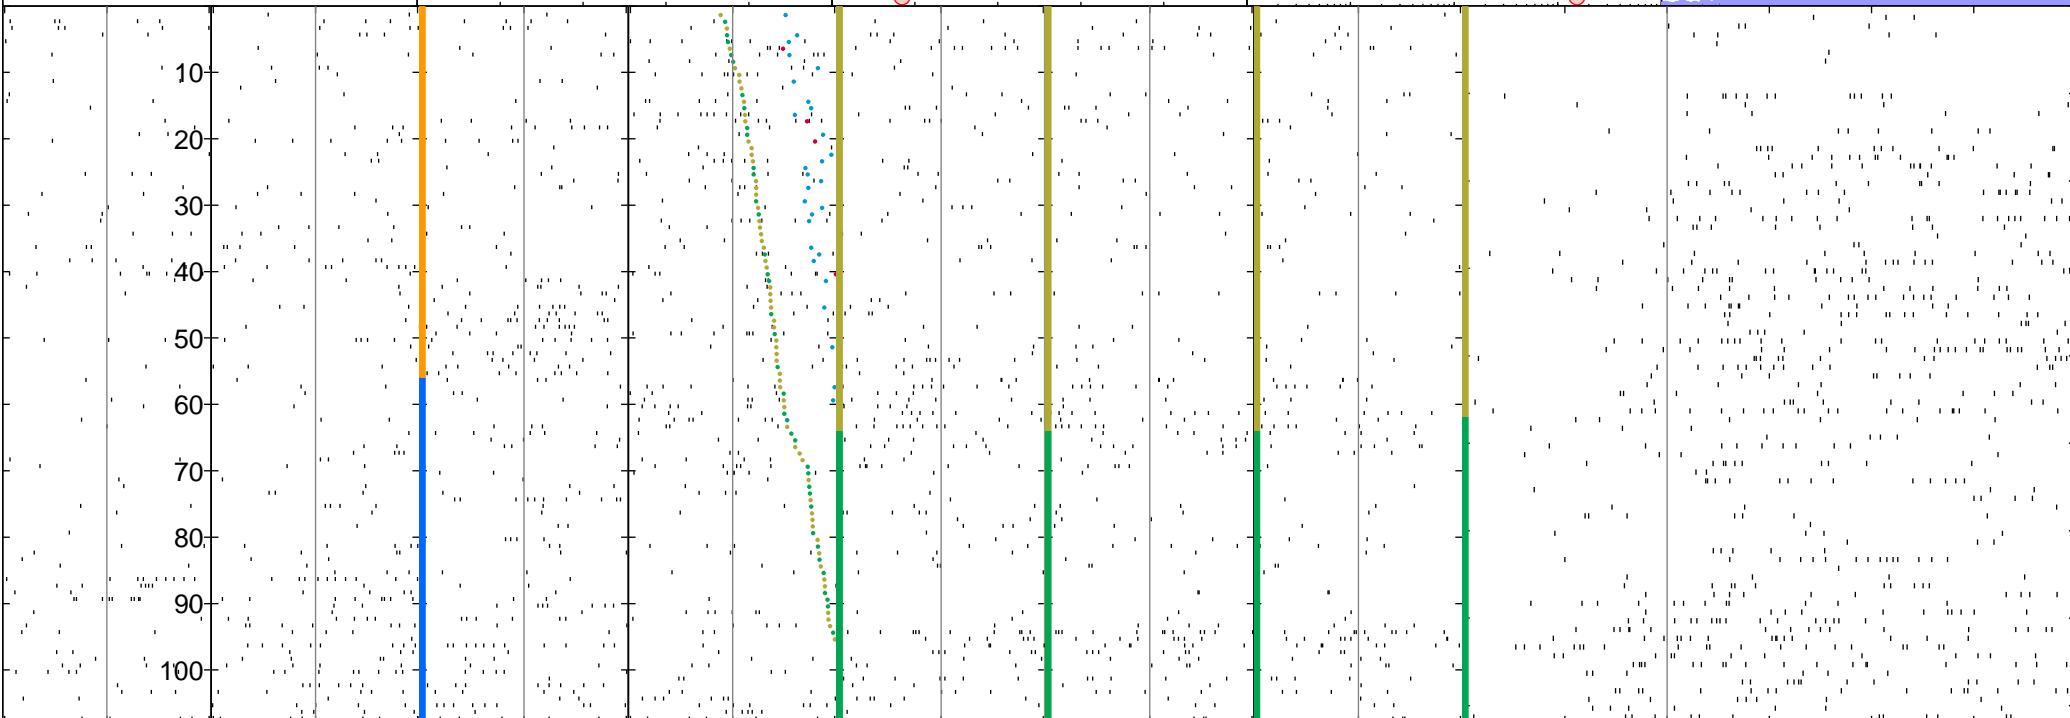

1 Cue On [107]

2 Nose In [107]

3 Tone [55,52]

4 Go [107]

5 Choice [63,44]

6 Side In [63,44]

7 Nose Out [63,44]

8 Reward [46,35]

7  
6  
5  
4  
3  
2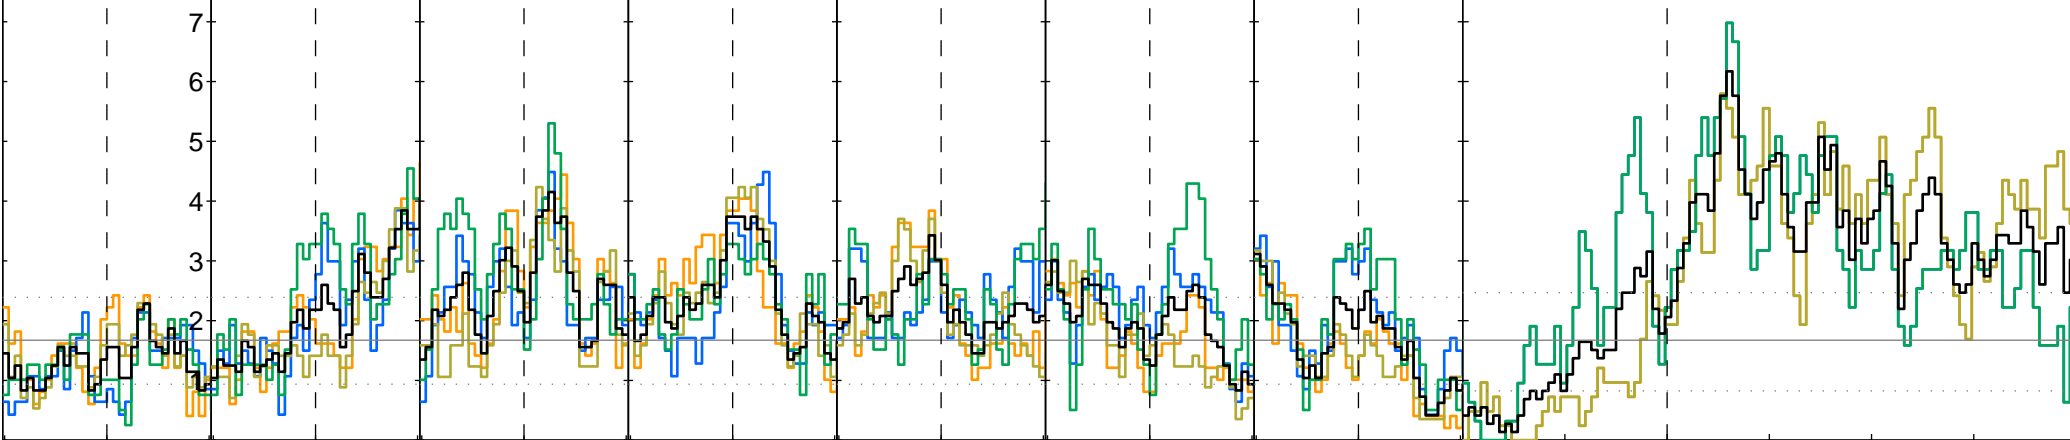



**Cell: C0320070618T07b**

AP: 0.96 ML: 3.6 DV: 5.6

w: 3 n: 47702  $P_{ISI>2}$ : 01/2pw: 272 $\mu$ s p $\rightarrow$ v: 797 $\mu$ s $\beta_T$ : -2.5  $\beta_D$ : -4.5 $\beta_P$ : -3.1 SI: -0.38

Session FR: 9.48 Hz

Pk Ev: 8 - Reward (T1/Con)

Pk FR: 18.9Hz (0.41s) Inv

Waveform

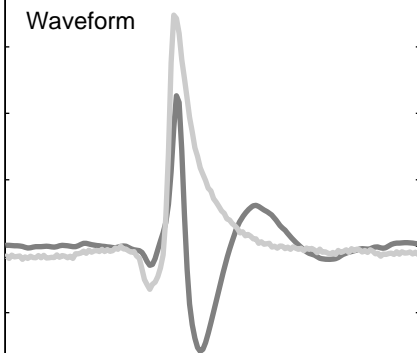

HP/PV

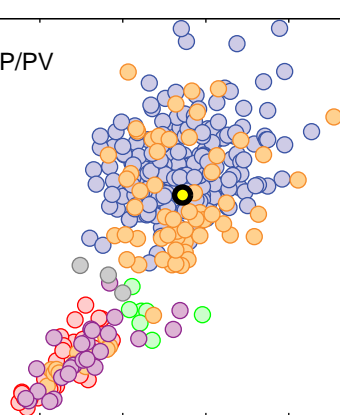

FR/PV

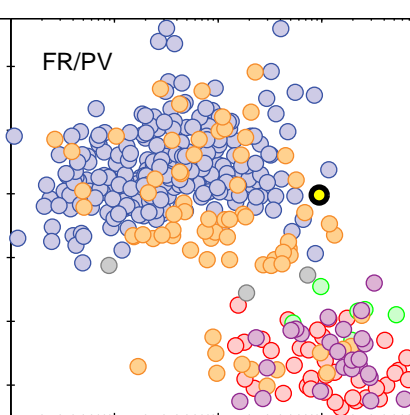

ISI Histogram [1921]

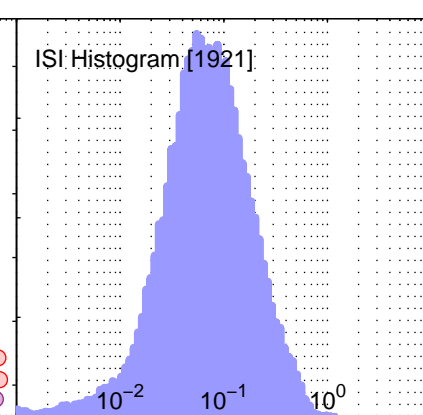10  
20  
30  
40  
50  
60  
70  
80  
90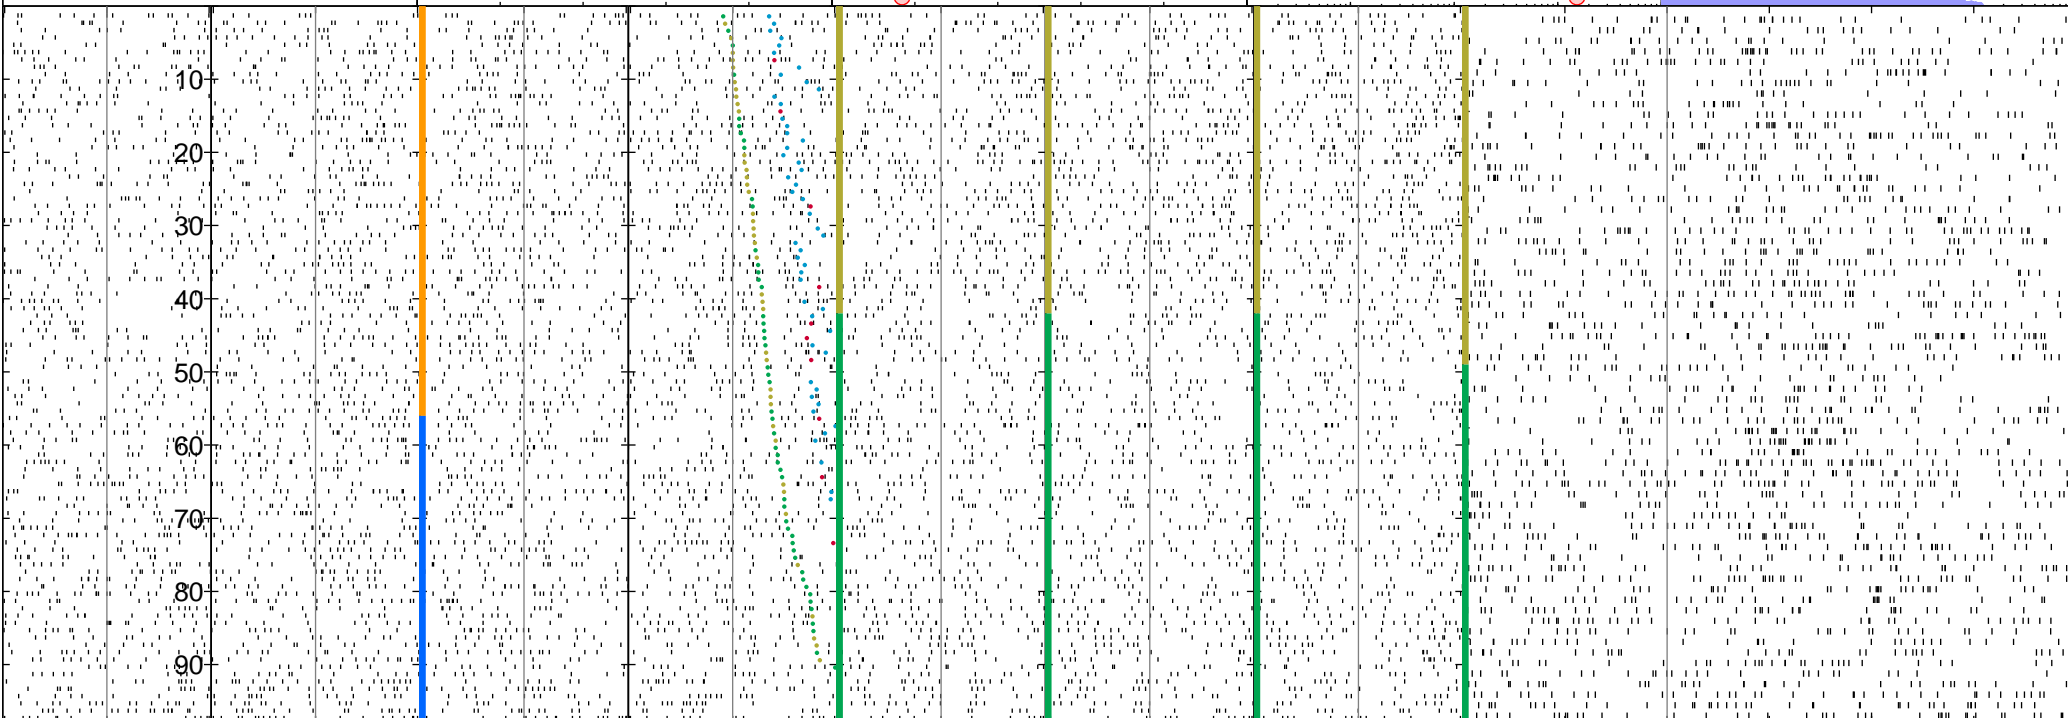

1 Cue On [97]

2 Nose In [97]

3 Tone [55,42]

4 Go [97]

5 Choice [41,56]

6 Side In [41,56]

7 Nose Out [41,56]

8 Reward [33,34]

15  
5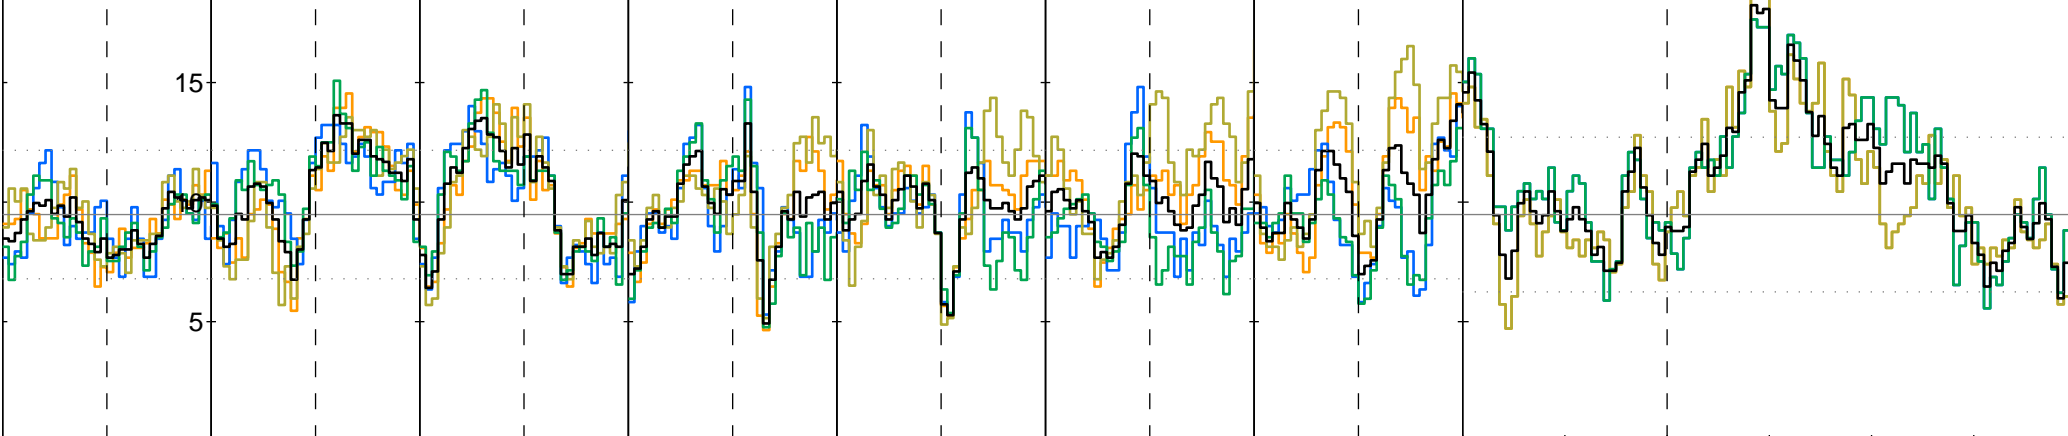

Cell: C0320070625T11d

AP: -0.96 ML: 3.7 DV: 6.2

w: 4 n: 45715  $P_{ISI>2}$ : 0

1/2pw: 130 $\mu$ s p->v: 834 $\mu$ s

$\beta_T$ : -3.3  $\beta_D$ : 3

$\beta_P$ : -3.4 SI: 0.31

Session FR: 16.2 Hz

Pk Ev: 8 - Reward (T1/Con)

Pk FR: 25.3Hz (0.62s) Inv

Waveform

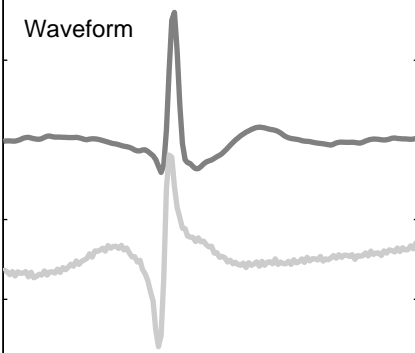

HP/PV

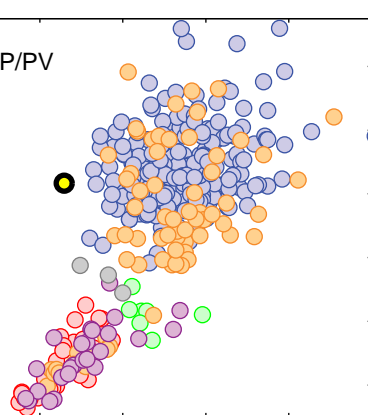

FR/PV

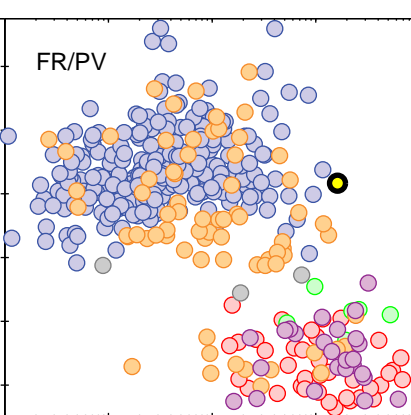

ISI Histogram [1760]

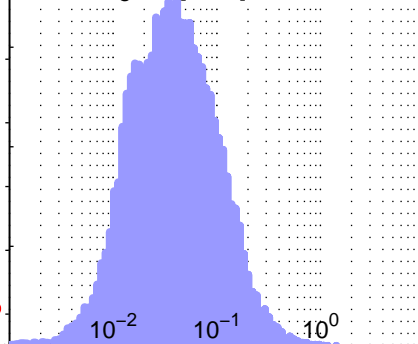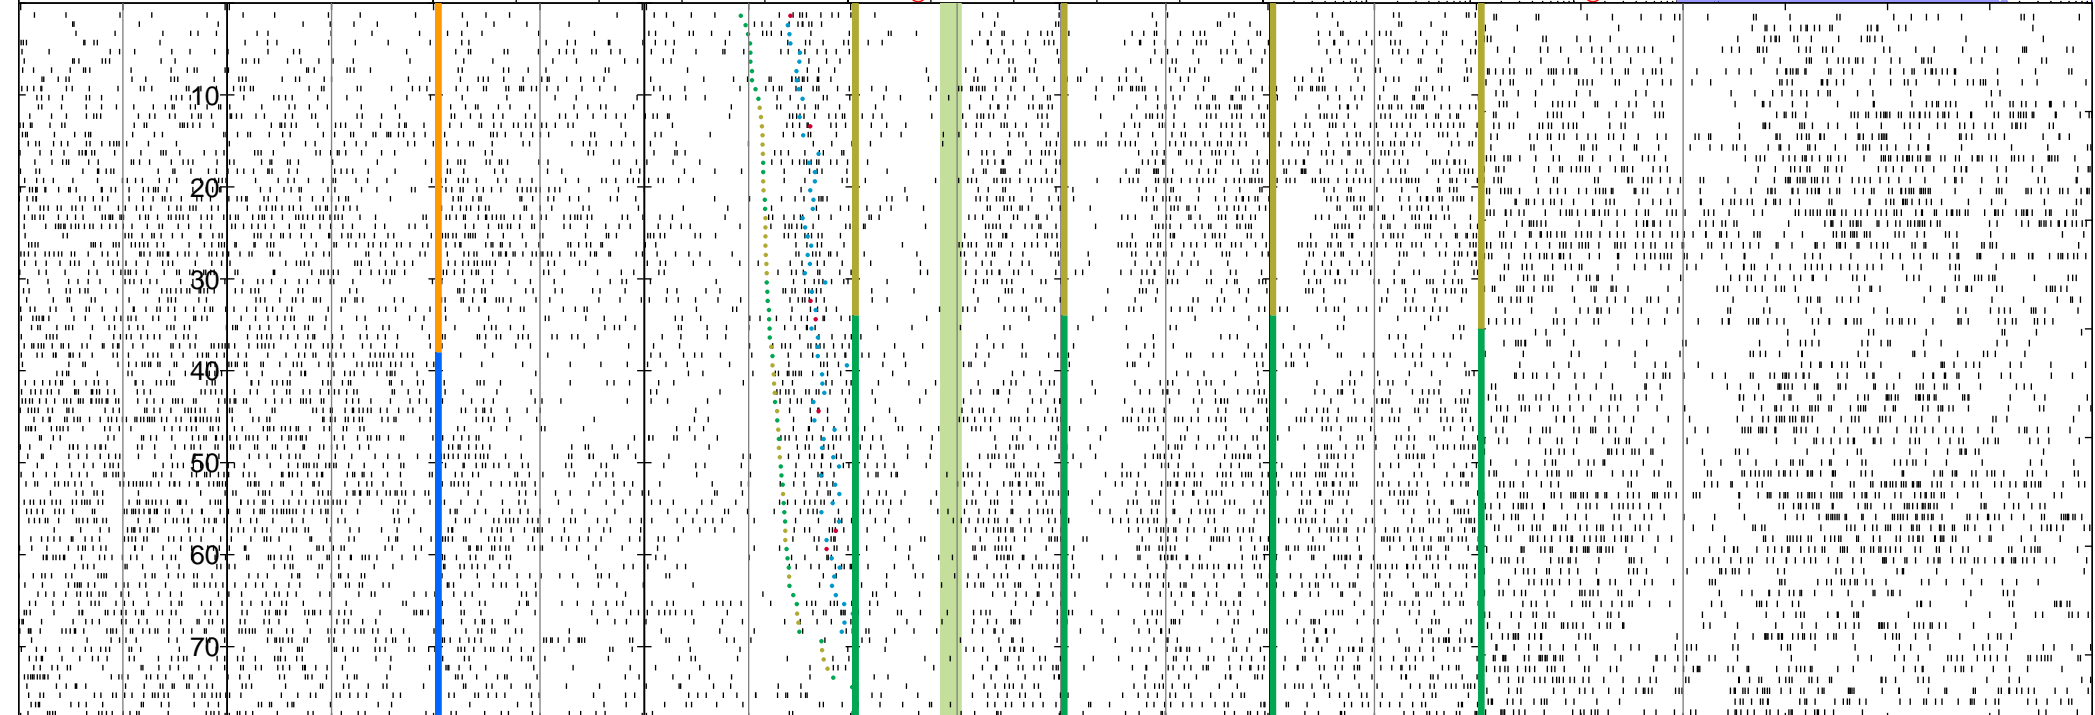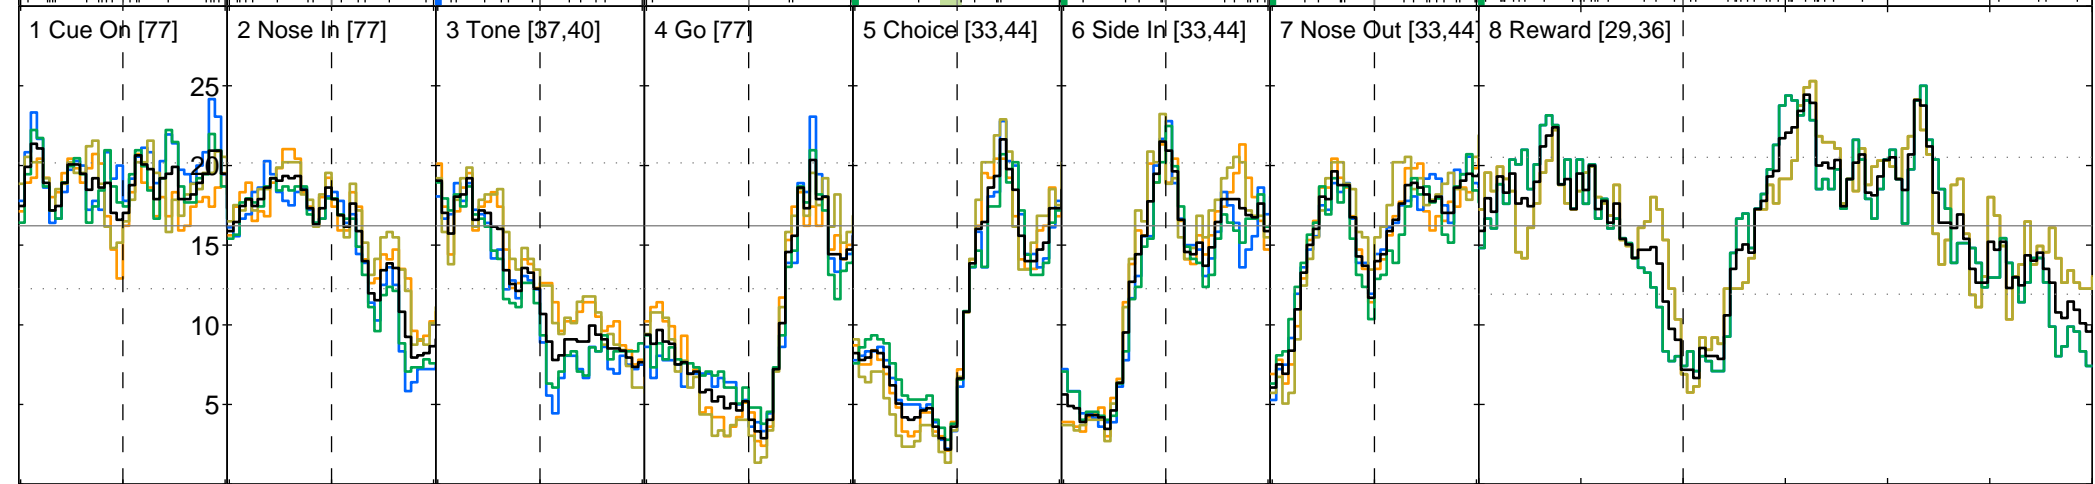

**Cell: C0320070611T15a**

AP: -2.3 ML: 4.6 DV: 6  
w: 4 n: 31203  $P_{ISI>2}$ : 0.11  
1/2pw: 0 $\mu$ s p->v: 0 $\mu$ s  
 $\beta_T$ : 3.5  $\beta_D$ : -3.4  
 $\beta_P$ : 2.7 SI: -0.84  
Session FR: 4.16 Hz  
Pk Ev: 8 - Reward (T1/Con)  
Pk FR: 11.8Hz (0.86s) Inv

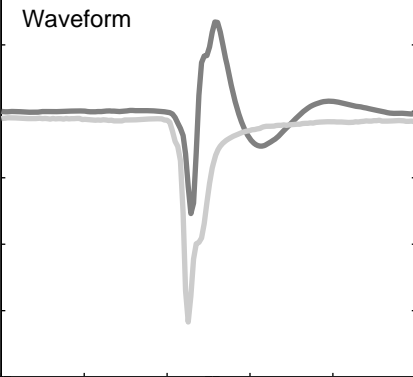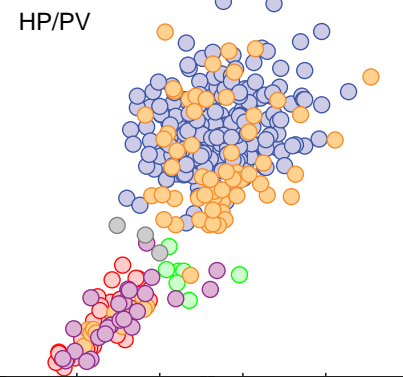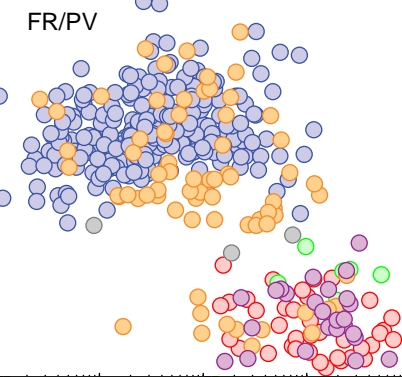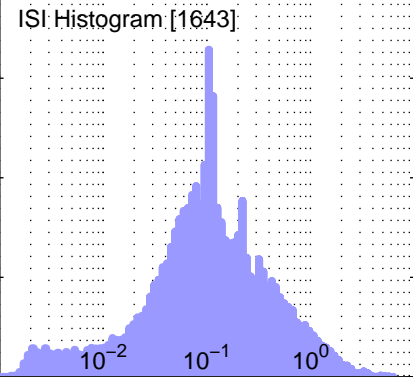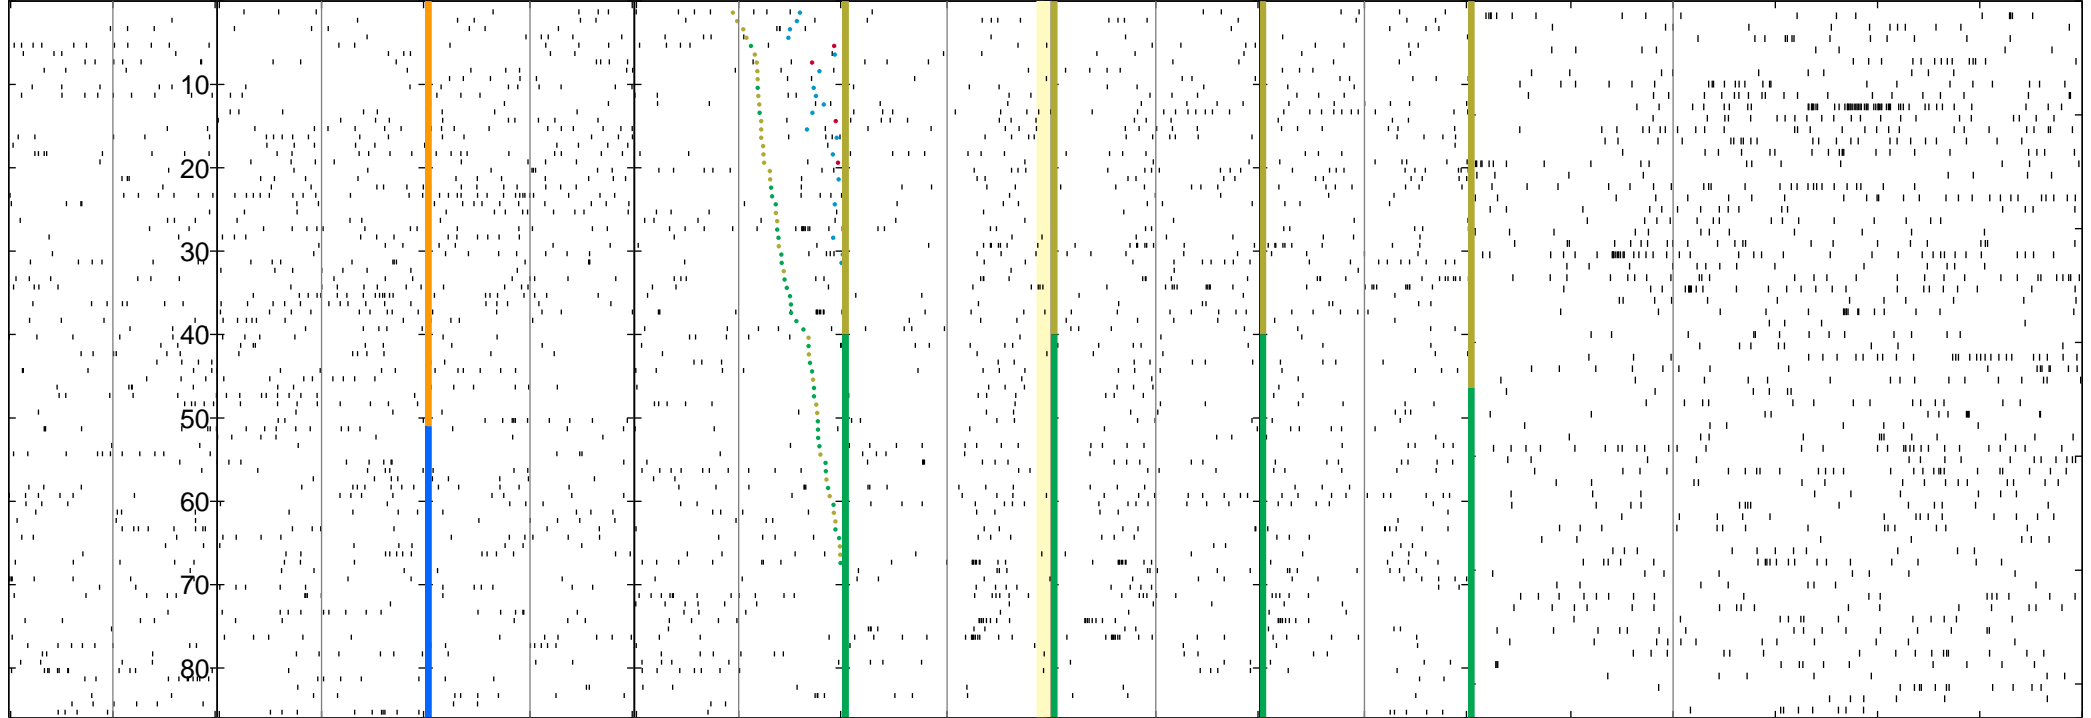

1 Cue On [85] 2 Nose In [85] 3 Tone [50,35] 4 Go [85] 5 Choice [39,46] 6 Side In [39,46] 7 Nose Out [39,46] 8 Reward [33,29]

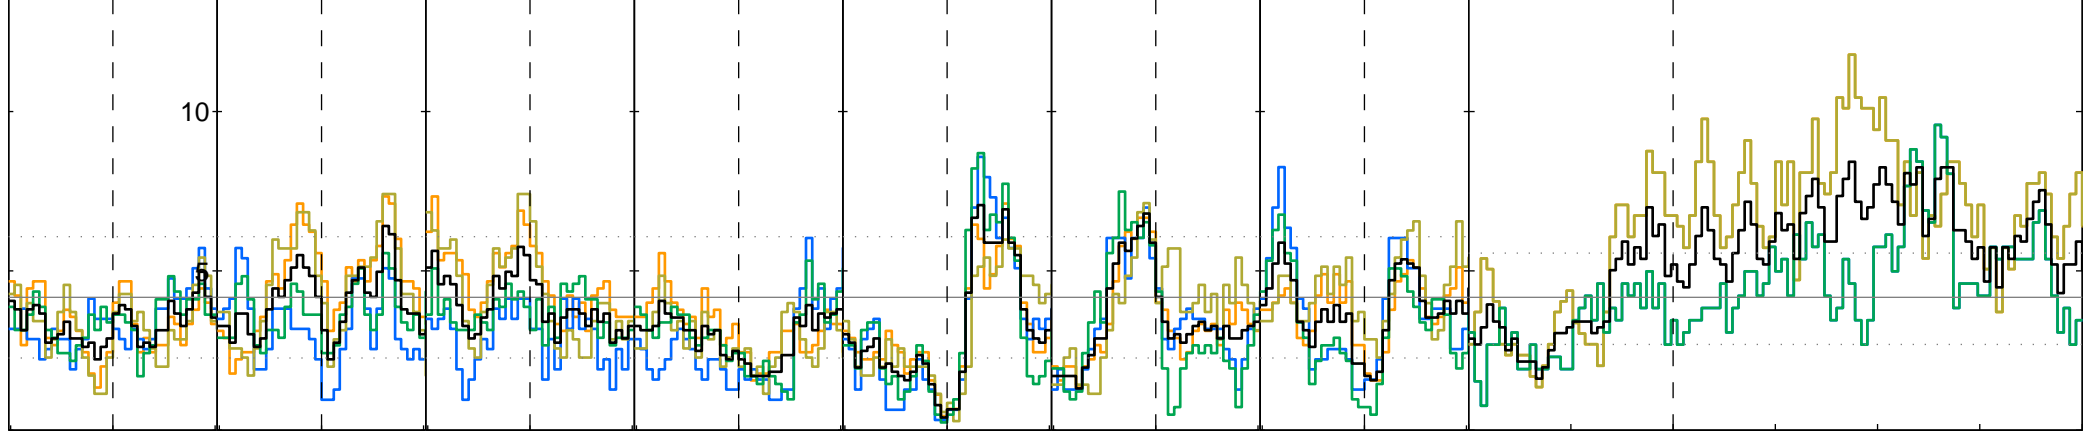

Cell: C0320070621T07e

AP: 0.96 ML: 3.6 DV: 6

w: 4 n: 19071  $P_{ISI>2}$ : 0.0031

1/2pw: 104 $\mu$ s p $\rightarrow$ v: 354 $\mu$ s

$\beta_T$ : 2.3  $\beta_D$ : -2.5

$\beta_P$ : 3.1 SI: -0.38

Session FR: 6.2 Hz

Pk Ev: 8 - Reward (T2/Ipsi)

Pk FR: 12.4Hz (1.25s) Inv

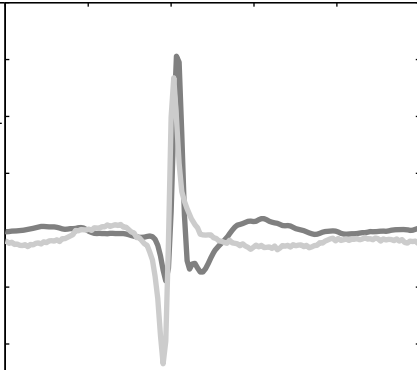

HP/PV

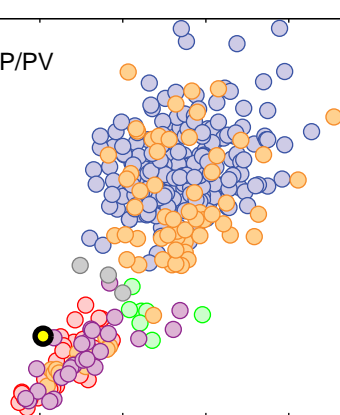

FR/PV

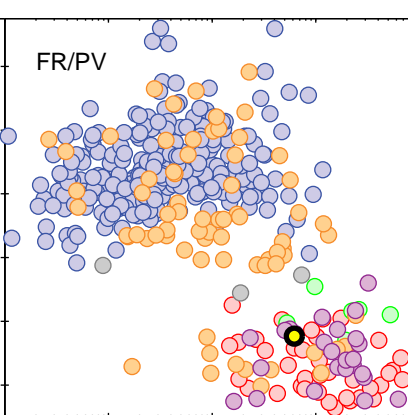

ISI Histogram [826]

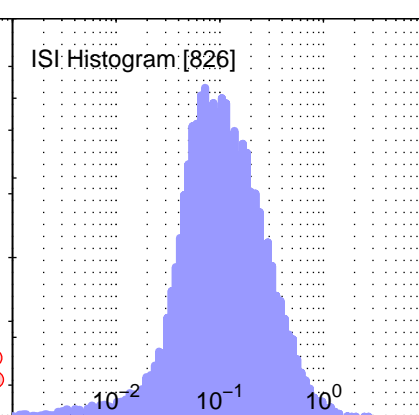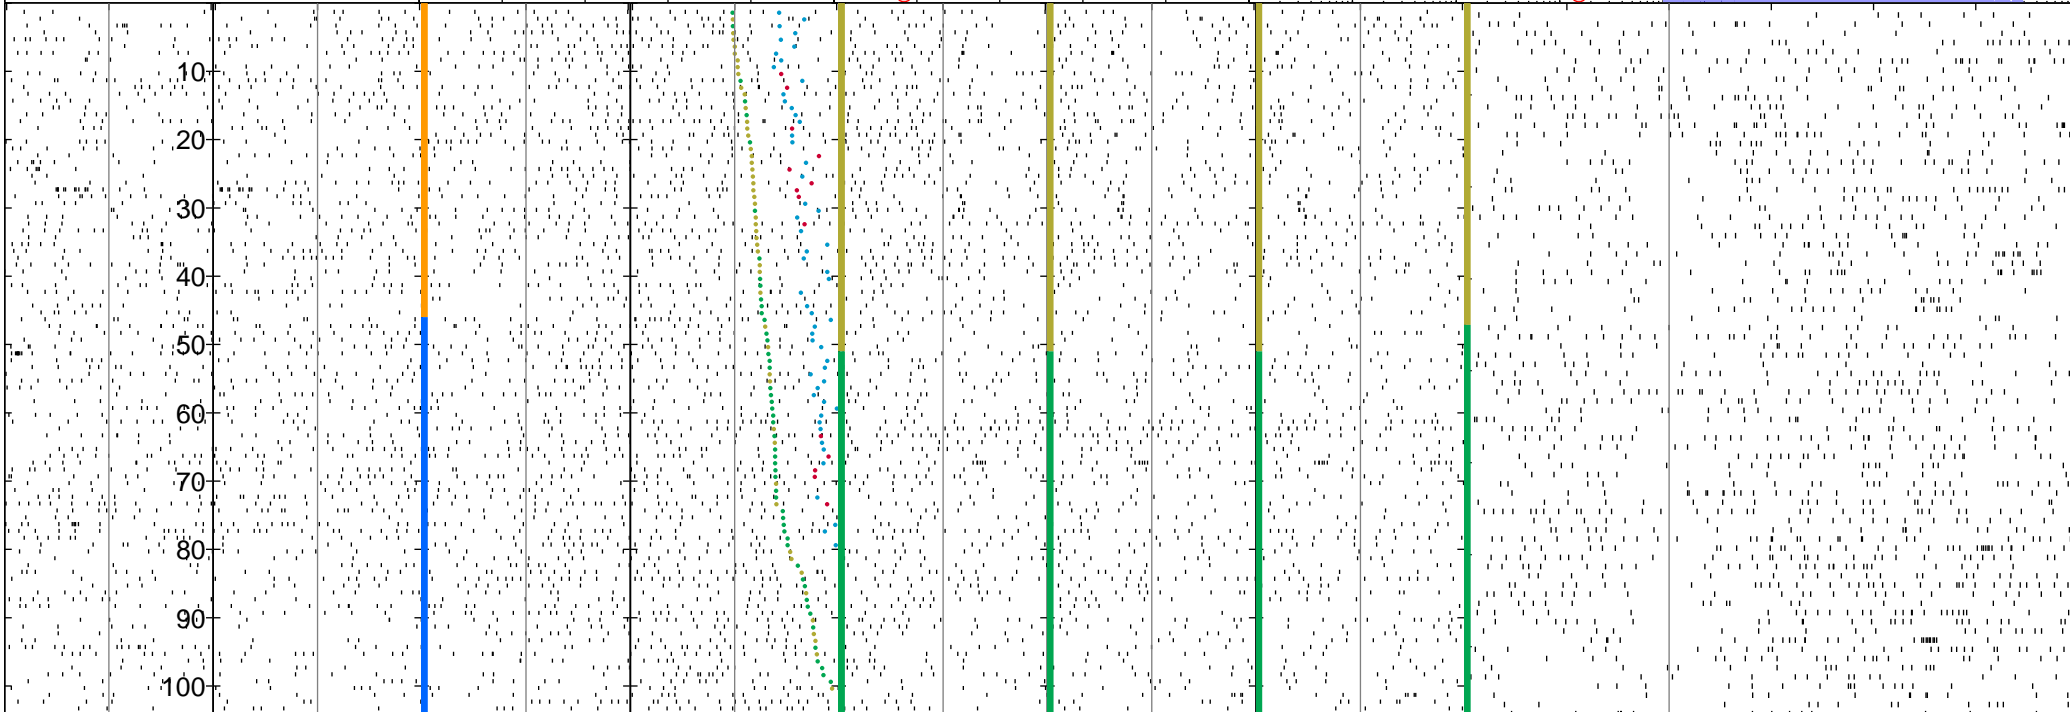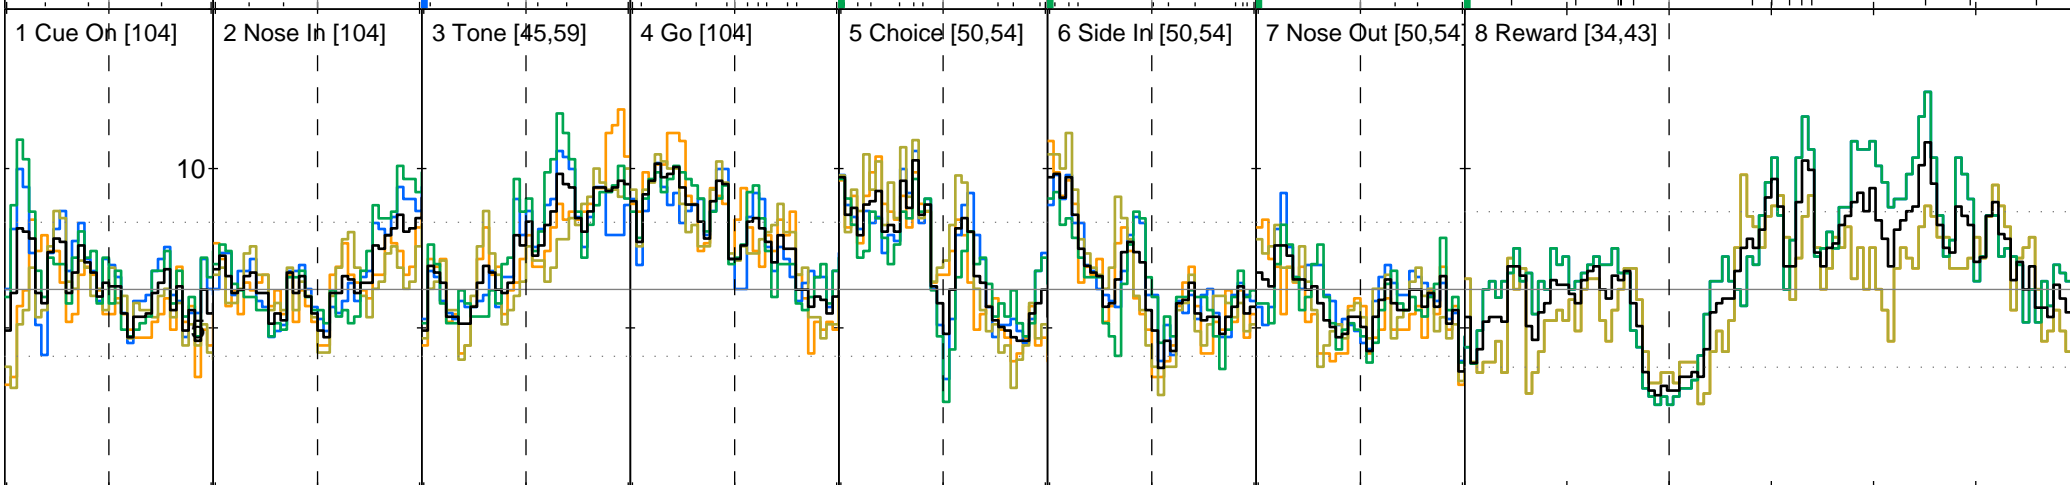

**Cell: C0320070611T07F**

AP: 0.96 ML: 3.6 DV: 5.1  
w: 4 n: 7821  $P_{ISI>2}$ : 0.73  
1/2pw: 146 $\mu$ s p->v: 407 $\mu$ s  
 $\beta_T$ : NaN  $\beta_D$ : NaN  
 $\beta_P$ : NaN SI: NaN  
Session FR: 1.05 Hz  
Pk Ev: None  
Pk FR: --

Inv

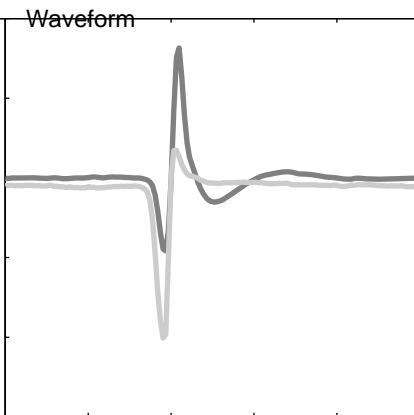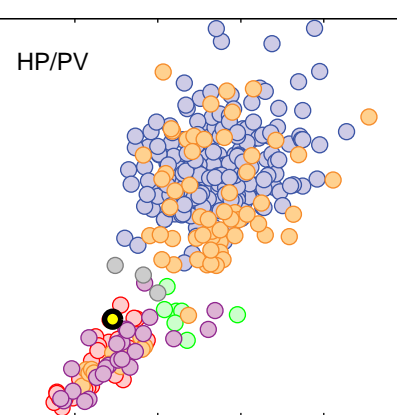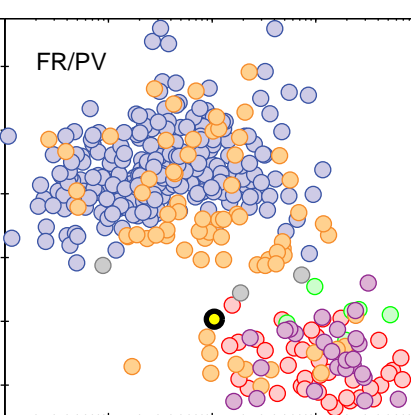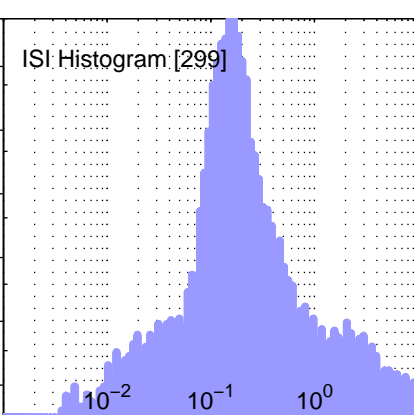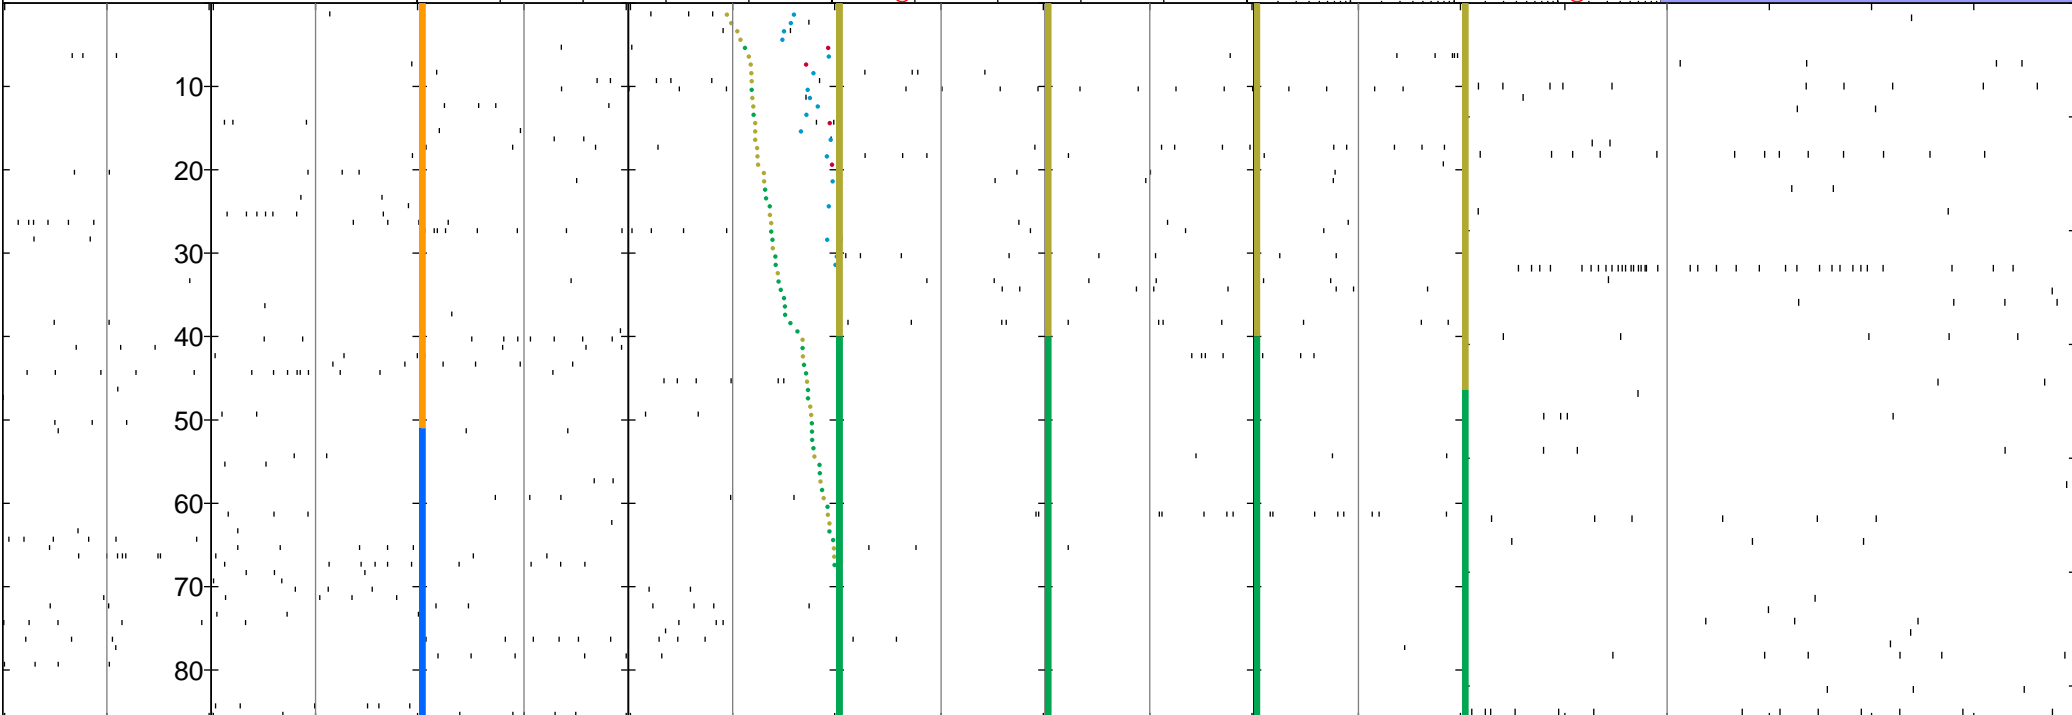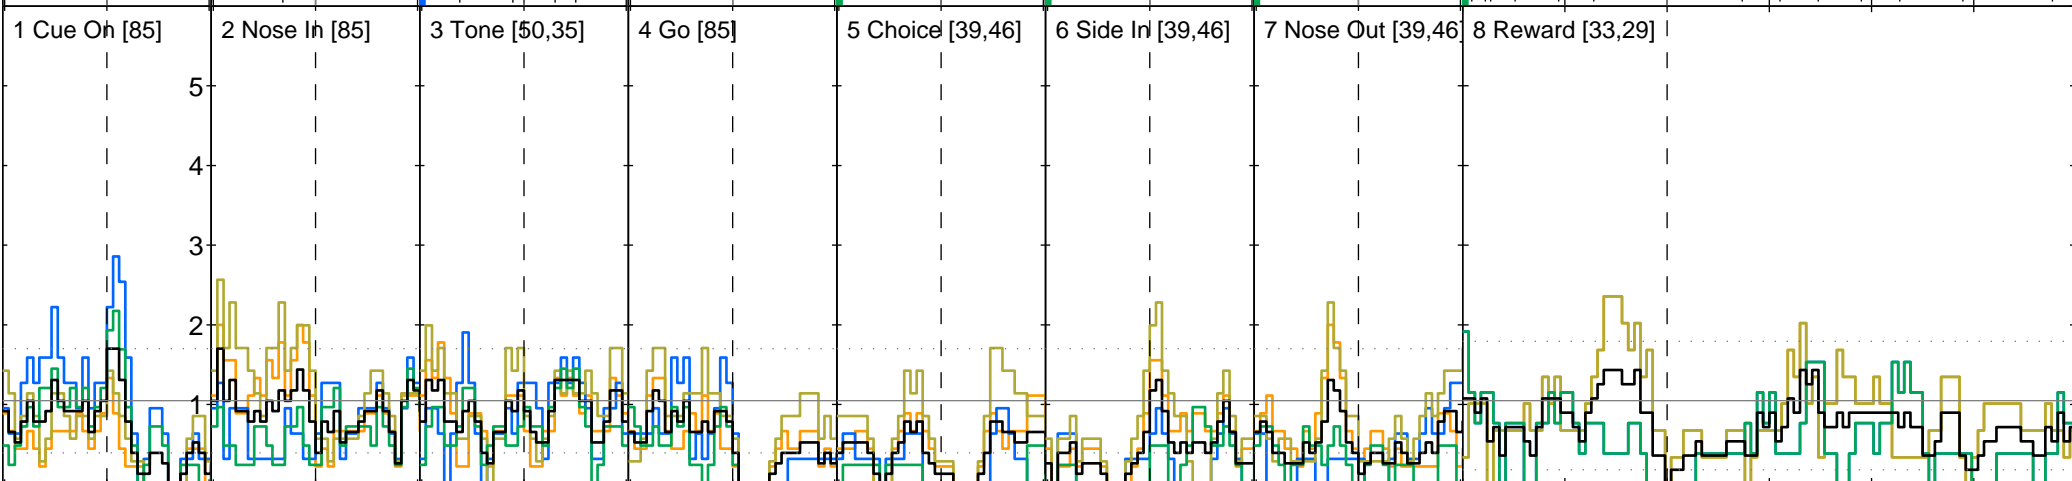

Cell: C0320070613T09e

AP: 1.6 ML: 3.7 DV: 4.7

w: 3 n: 491  $P_{ISI>2}$ : 0.95

1/2pw: 94 $\mu$ s p->v: 194 $\mu$ s

$\beta_T$ : NaN  $\beta_D$ : NaN

$\beta_P$ : NaN SI: NaN

Session FR: 0.176 Hz

Pk Ev: None

Pk FR: --

Inv

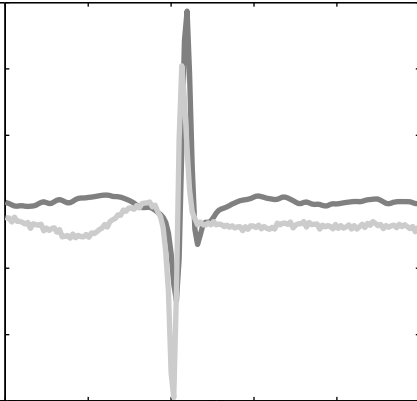

HP/PV

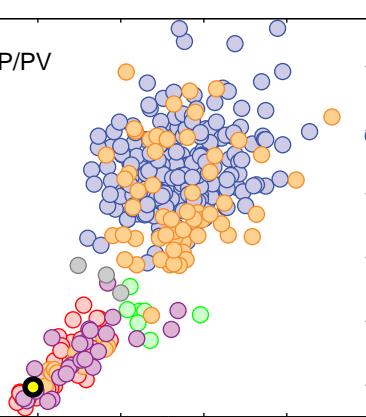

FR/PV

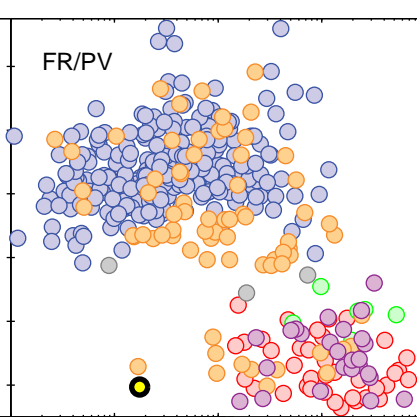

ISI Histogram [20]

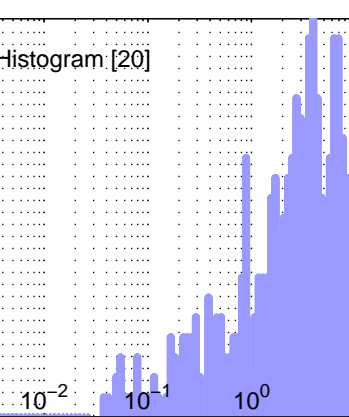

10

20

30

40

50

60

70

1 Cue On [74]

2 Nose In [74]

3 Tone [35,39]

4 Go [74]

5 Choice [38,36]

6 Side In [38,36]

7 Nose Out [38,36]

8 Reward [26,28]

5

4

3

2

1

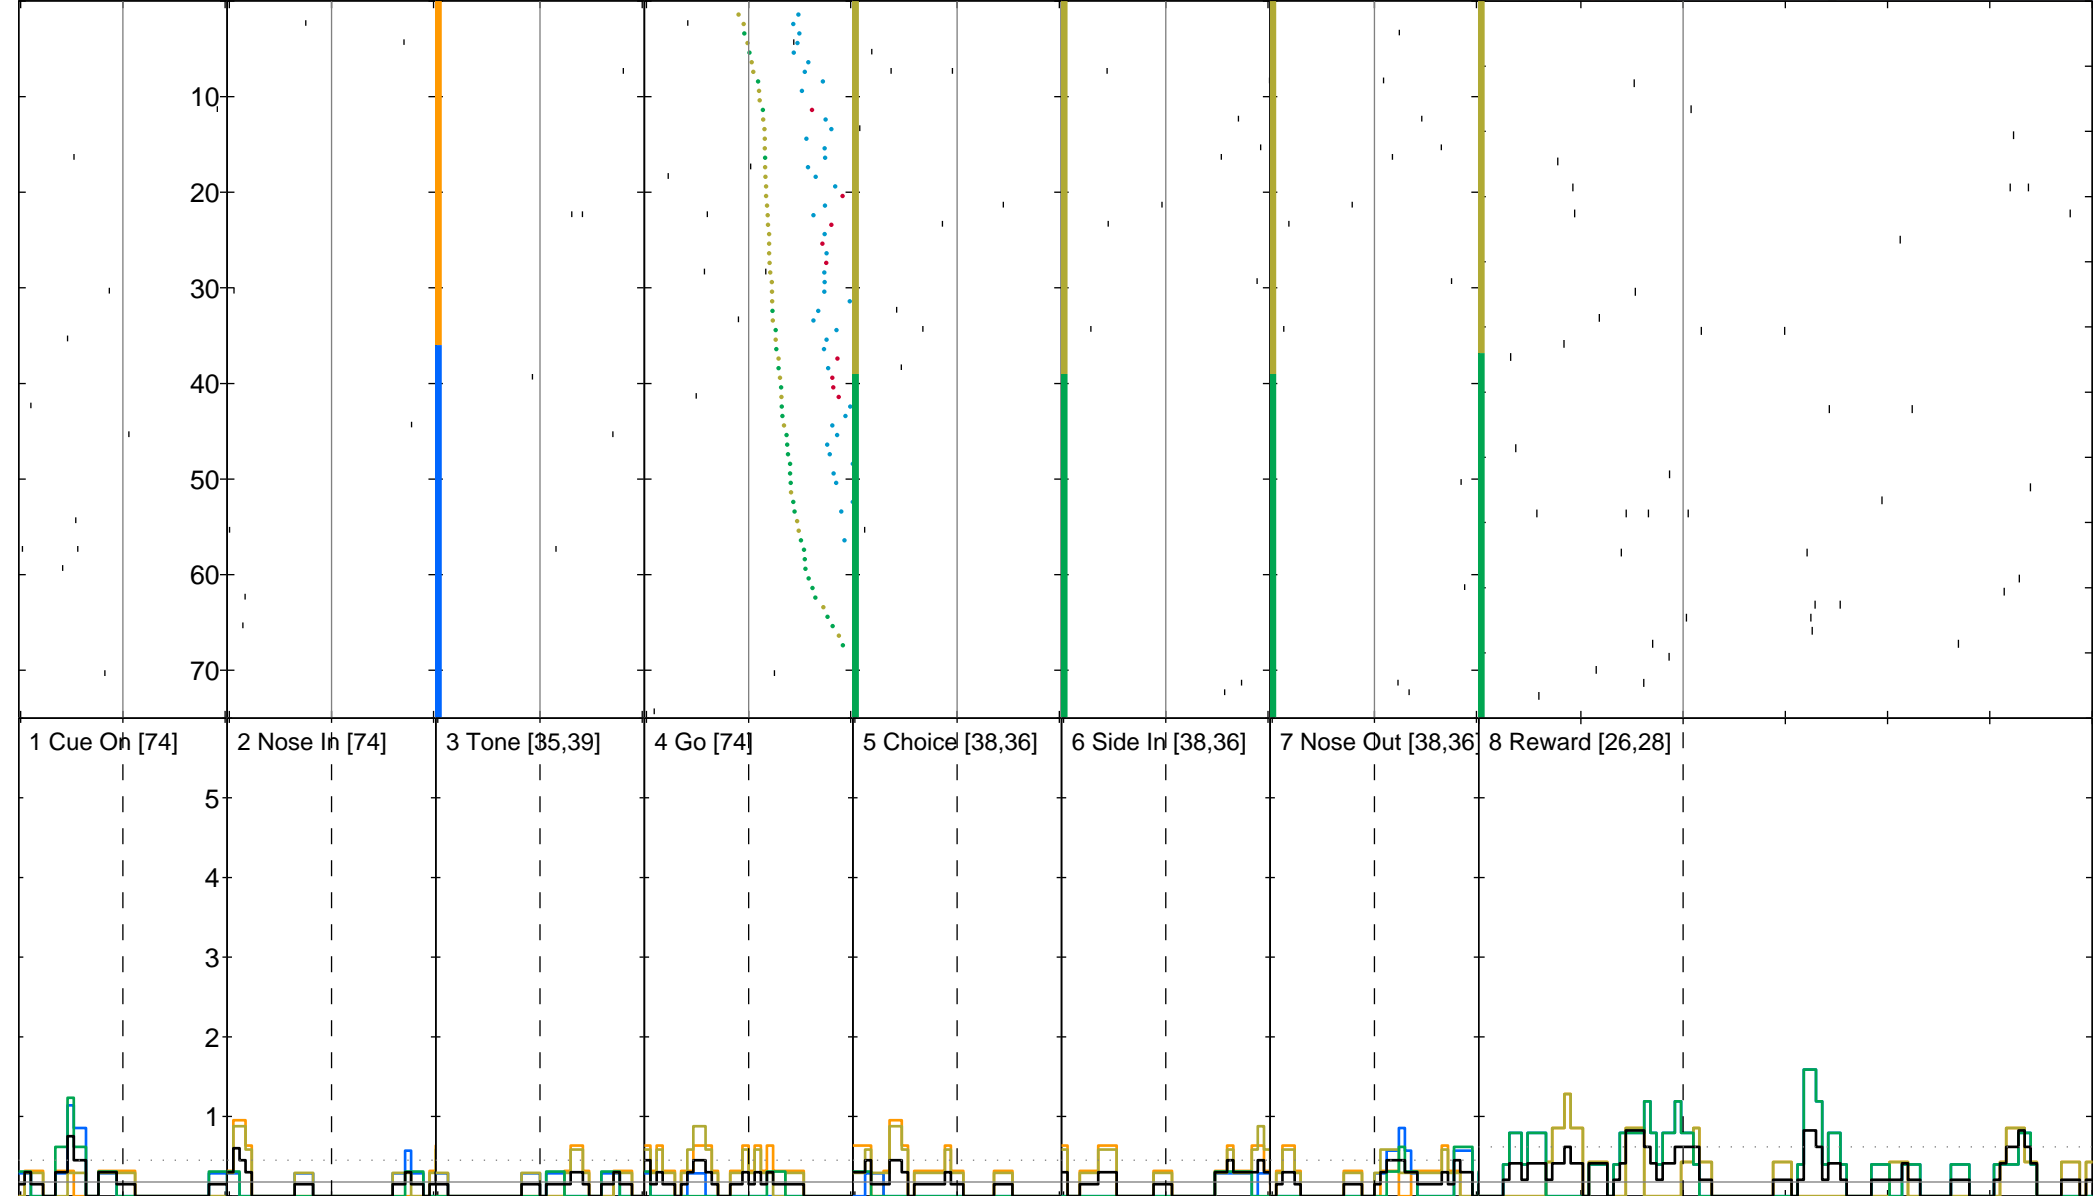

**Cell: C0320070618T07k**

AP: 0.96 ML: 3.6 DV: 5.6

w: 4 n: 206  $P_{ISI>2}$ : 1

1/2pw: 253 $\mu$ s p->v: 634 $\mu$ s

$\beta_T$ : NaN  $\beta_D$ : NaN

$\beta_P$ : NaN SI: NaN

Session FR: 0.042 Hz

Pk Ev: None

Pk FR: --

Inv

Waveform

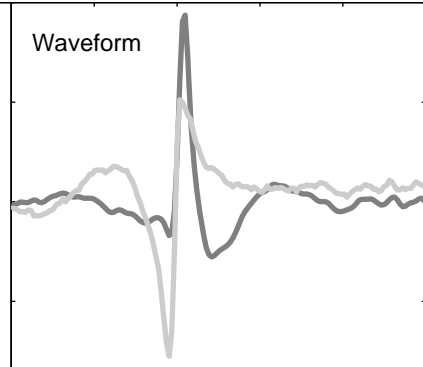

HP/PV

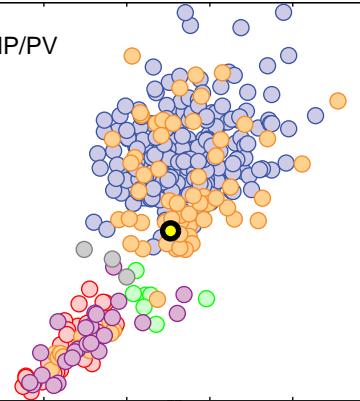

FR/PV

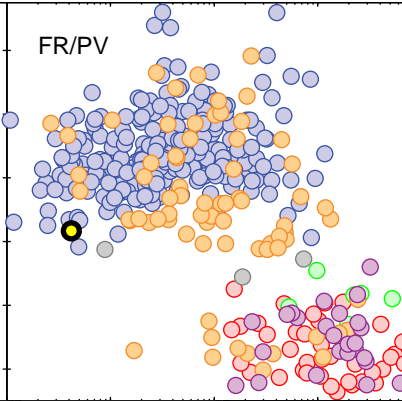

ISI Histogram [7]

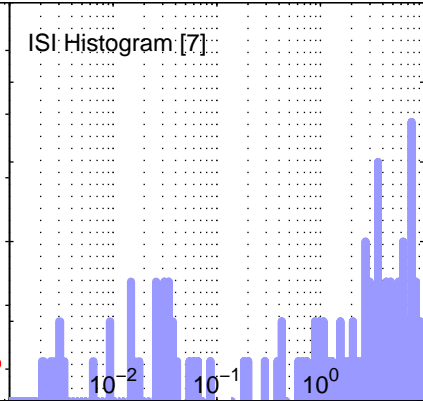

10  
20  
30  
40  
50  
60  
70  
80  
90

1 Cue On [97] 2 Nose In [97] 3 Tone [55,42] 4 Go [97] 5 Choice [41,56] 6 Side In [41,56] 7 Nose Out [41,56] 8 Reward [33,34]

5  
4  
3  
2  
1

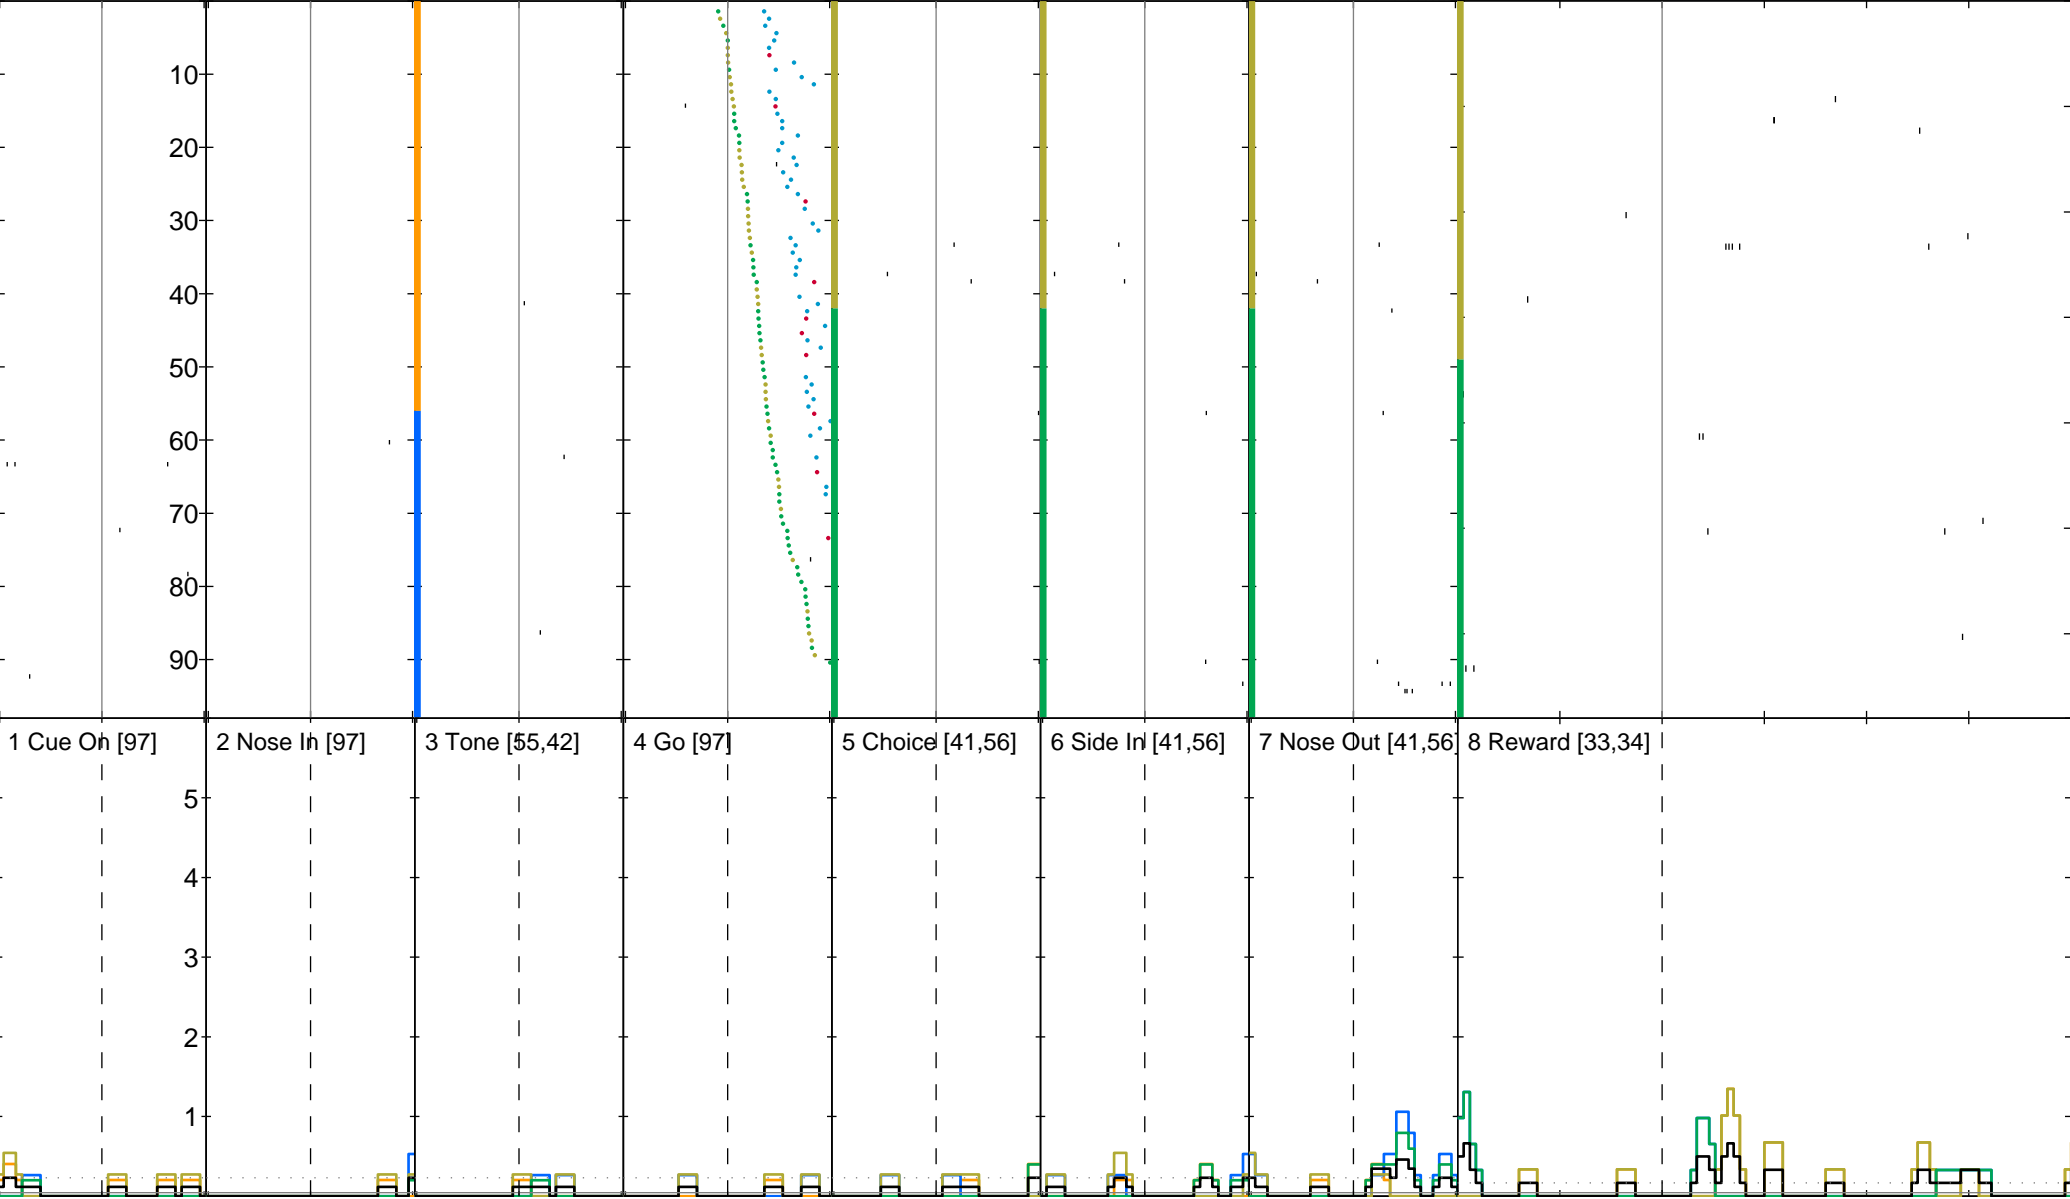

**Cell: C0320070618T09F**

AP: 1.6 ML: 3.7 DV: 4.9  
w: 3 n: 366  $P_{ISI>2}$ : 0.99  
1/2pw: 224 $\mu$ s p->v: 538 $\mu$ s  
 $\beta_T$ : NaN  $\beta_D$ : NaN  
 $\beta_P$ : NaN SI: NaN  
Session FR: 0.073 Hz  
Pk Ev: None  
Pk FR: --

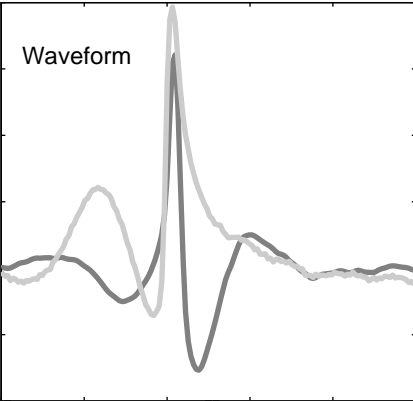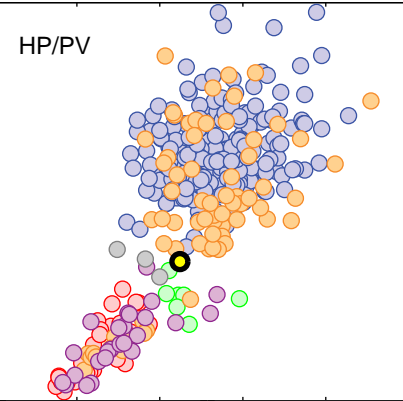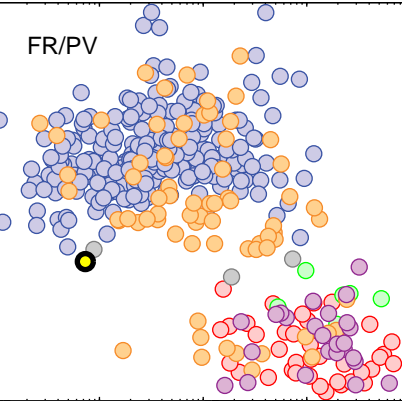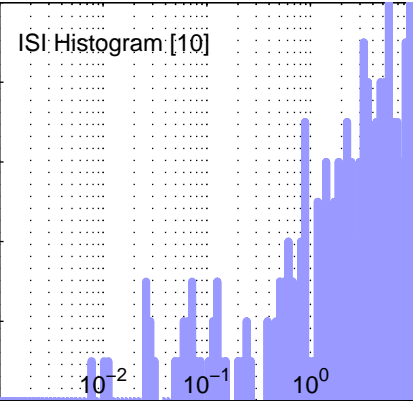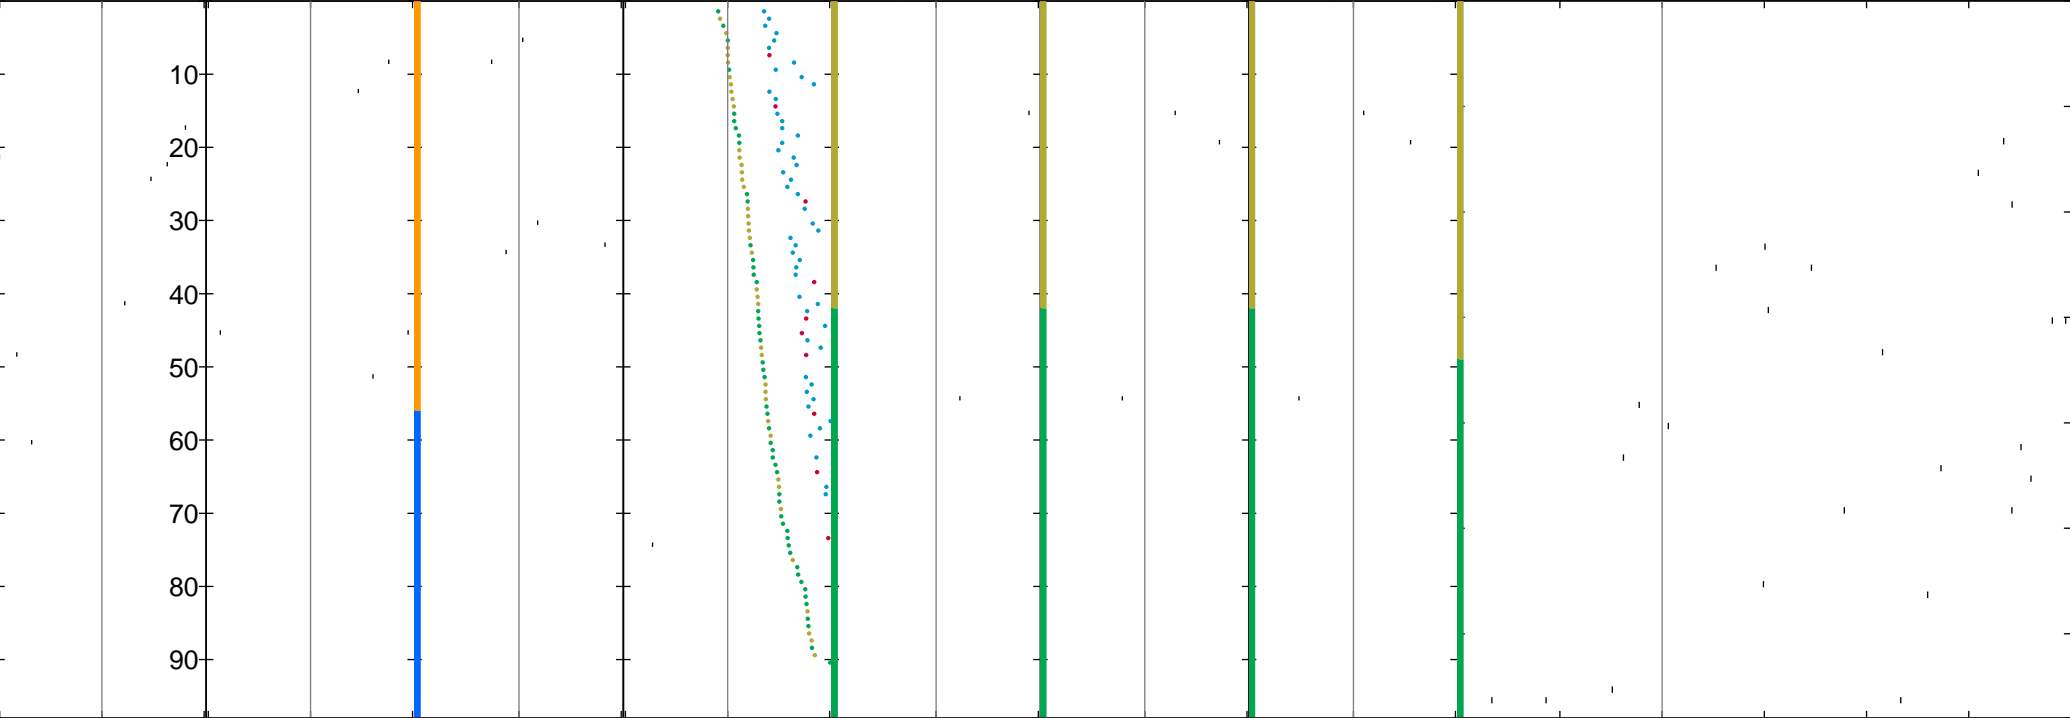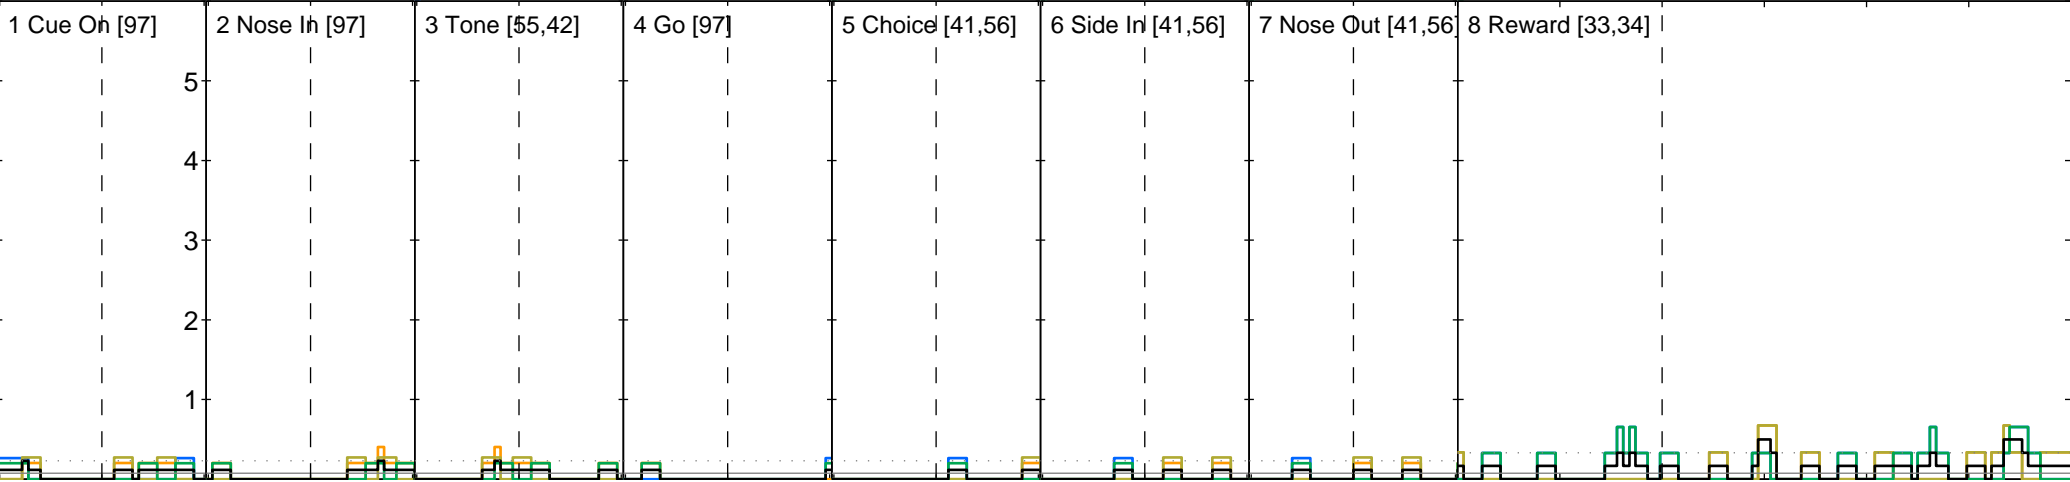



**Cell: C0320070619T11b**

AP: -0.96 ML: 3.7 DV: 5.4  
w: 4 n: 182  $P_{ISI>2}$ : 1  
1/2pw: 0 $\mu$ s p->v: 0 $\mu$ s  
 $\beta_T$ : NaN  $\beta_D$ : NaN  
 $\beta_P$ : NaN SI: NaN  
Session FR: 0.0431 Hz  
Pk Ev: None  
Pk FR: --

Inv

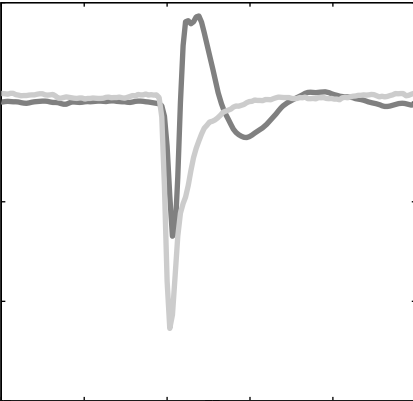

HP/PV

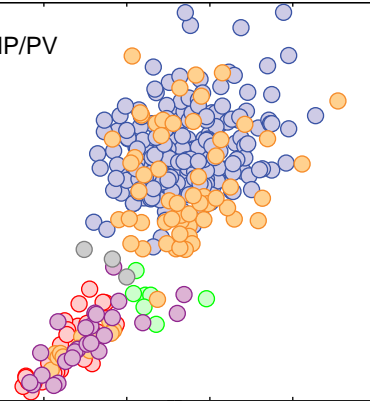

FR/PV

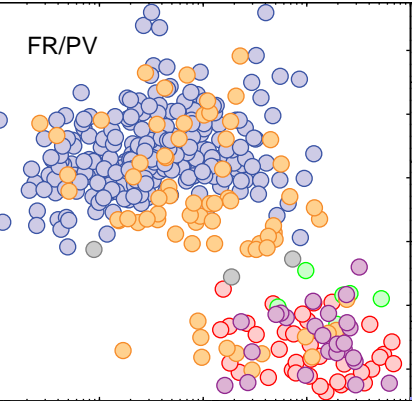

ISI Histogram [7]

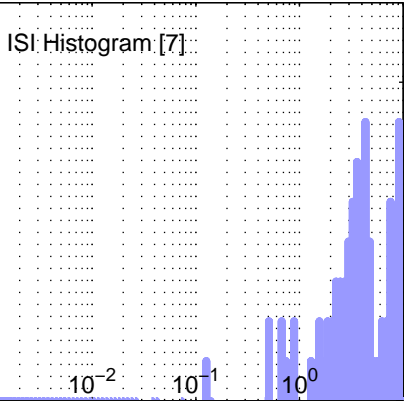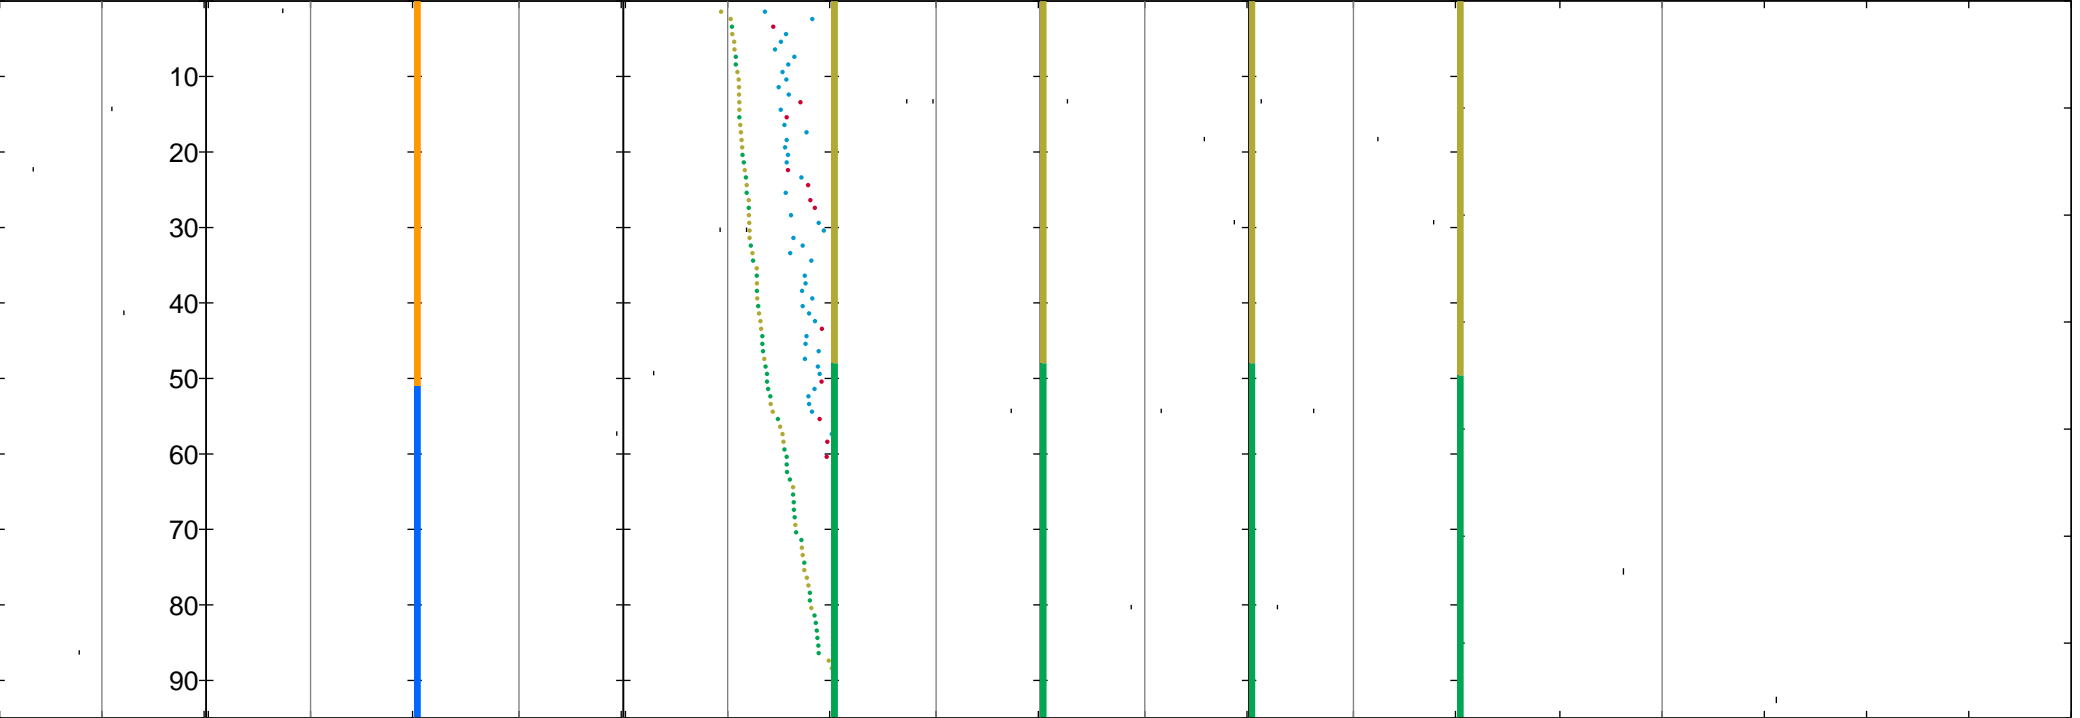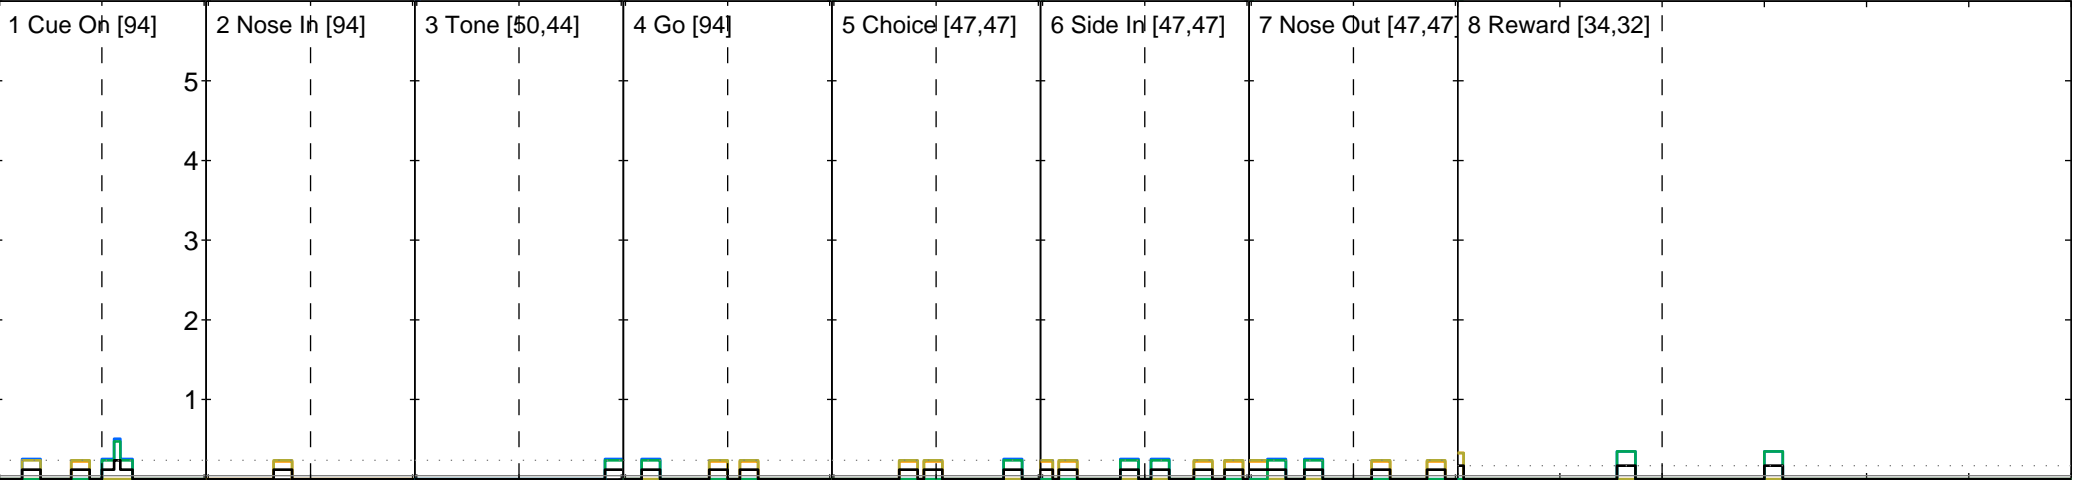

**Cell: C0320070623T09e**

AP: 1.6 ML: 3.7 DV: 5.3  
w: 2 n: 507  $P_{ISI>2}$ : 0.97  
1/2pw: 149 $\mu$ s p->v: 304 $\mu$ s  
 $\beta_T$ : NaN  $\beta_D$ : NaN  
 $\beta_P$ : NaN SI: NaN  
Session FR: 0.134 Hz  
Pk Ev: None  
Pk FR: --

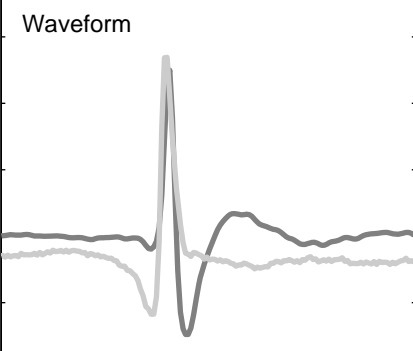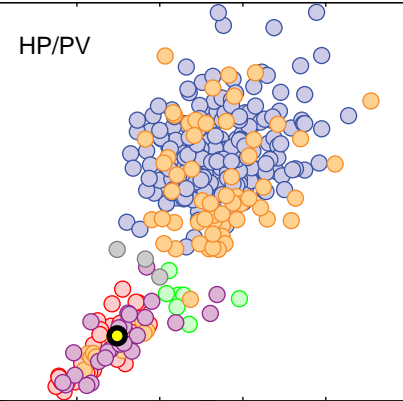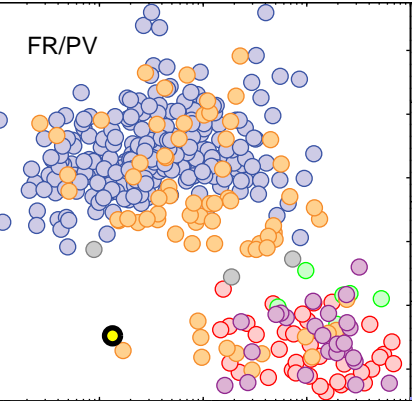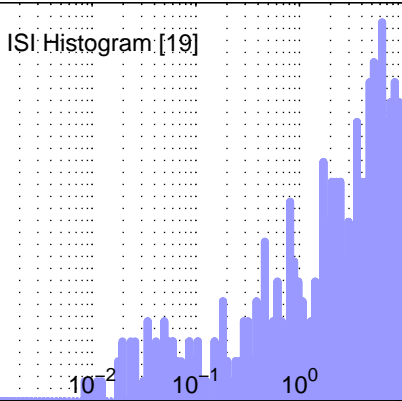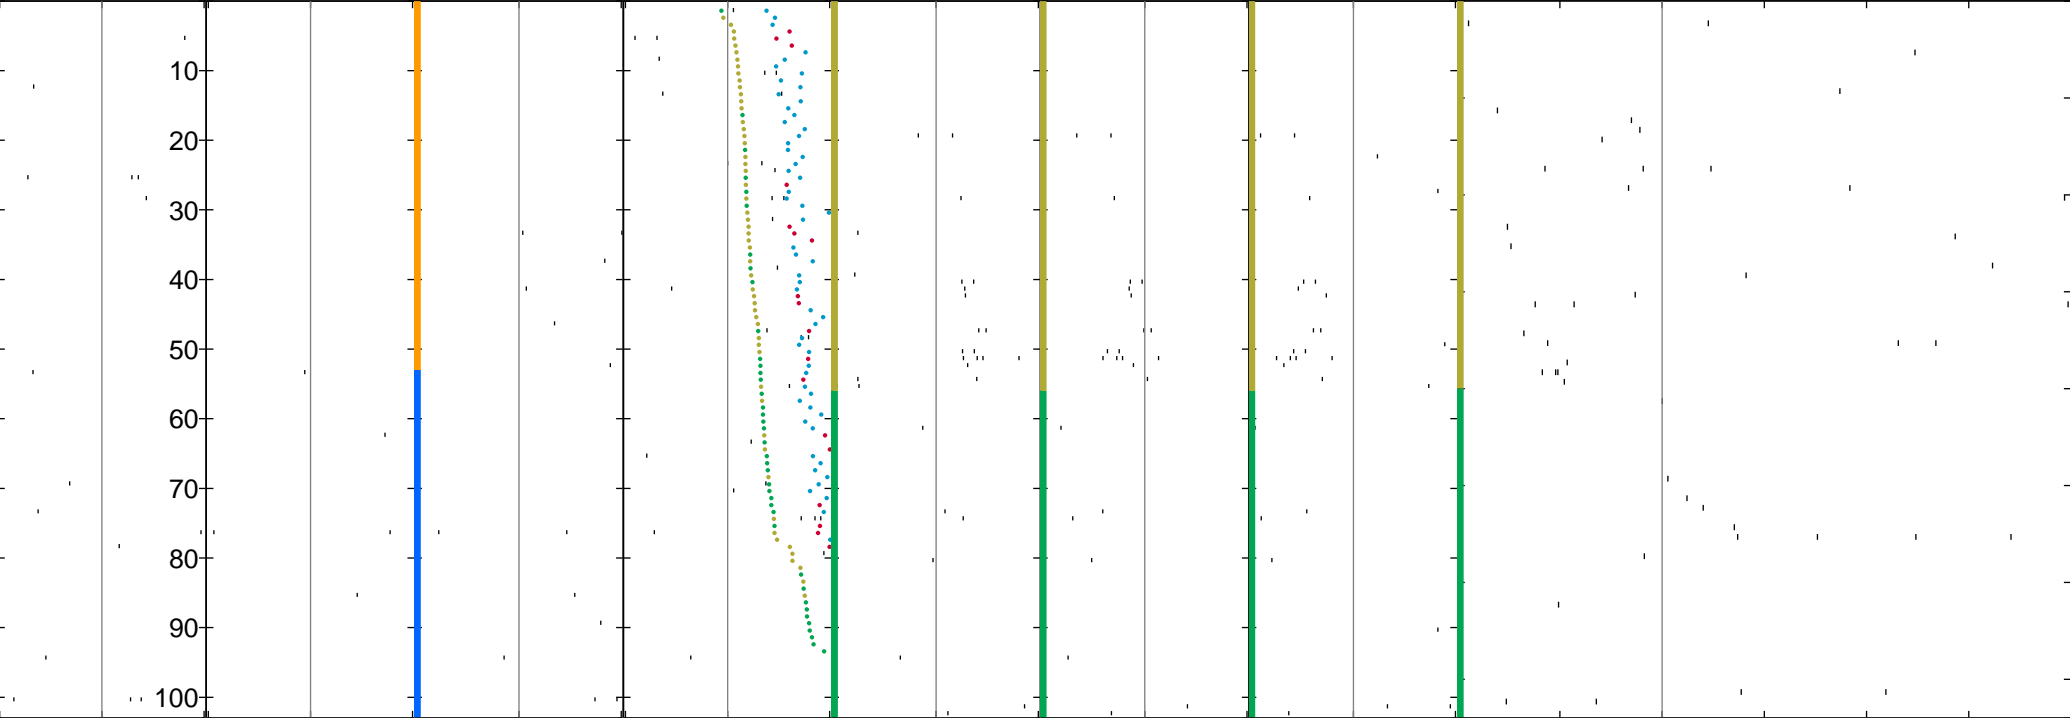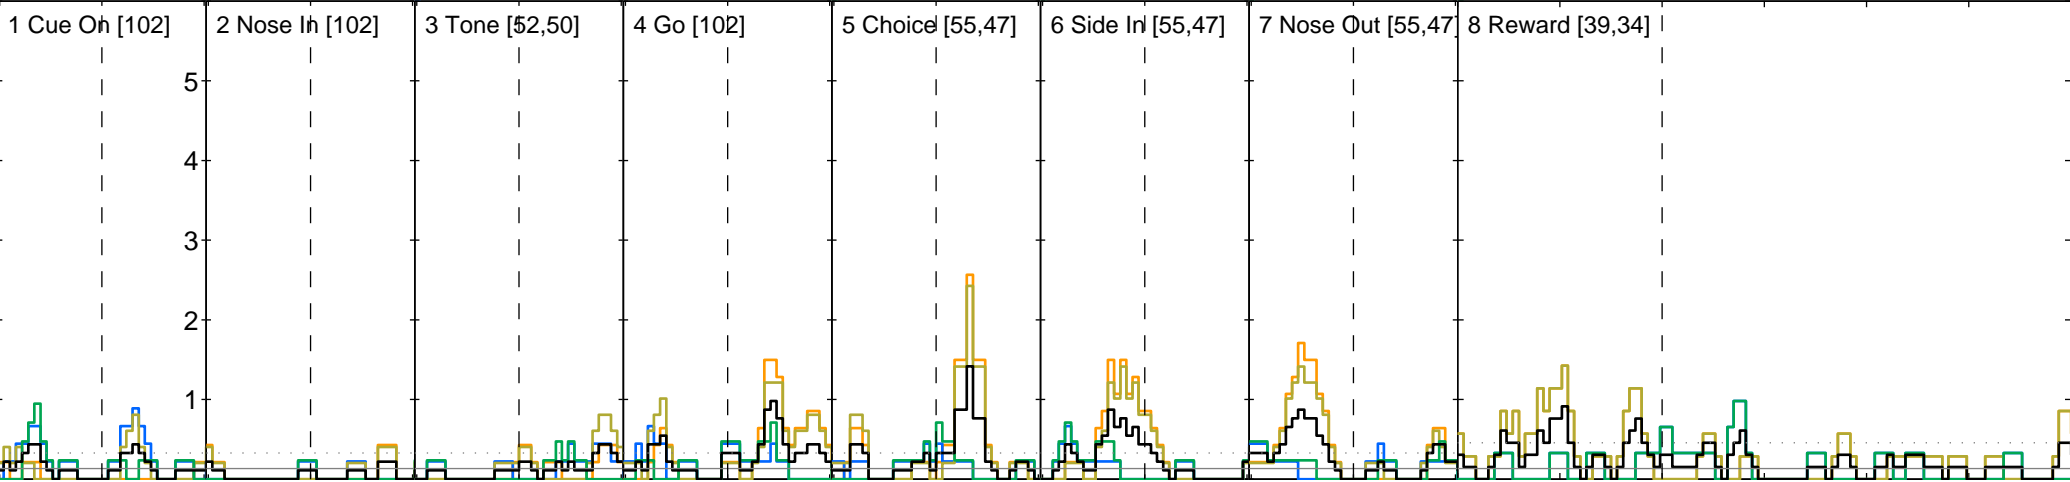

**Cell: C0320070630T09d**

AP: 1.6 ML: 3.7 DV: 6.2  
w: 1 n: 1523  $P_{ISI>2}$ : 0.78  
1/2pw: 163 $\mu$ s p->v: 448 $\mu$ s  
 $\beta_T$ : NaN  $\beta_D$ : NaN  
 $\beta_P$ : NaN SI: NaN  
Session FR: 0.502 Hz  
Pk Ev: None  
Pk FR: --

Inv

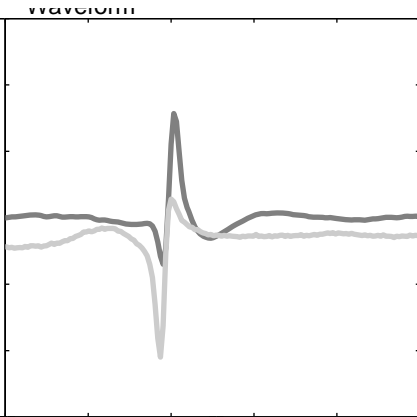

HP/PV

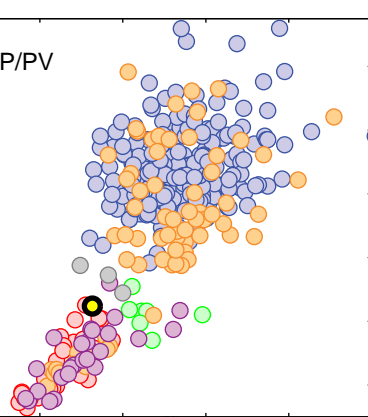

FR/PV

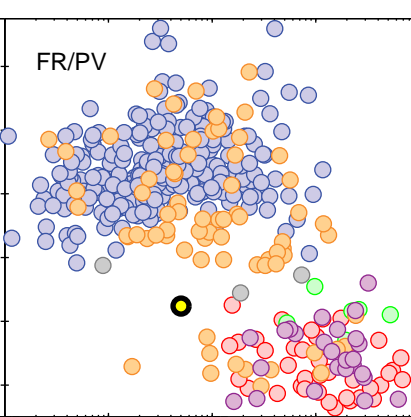

ISI Histogram [56]

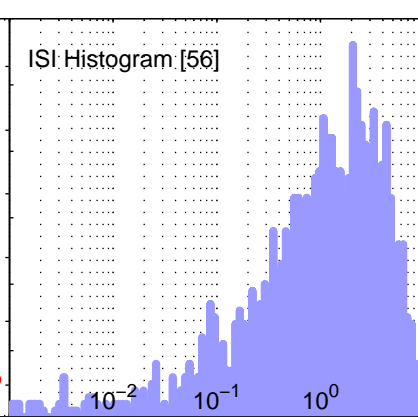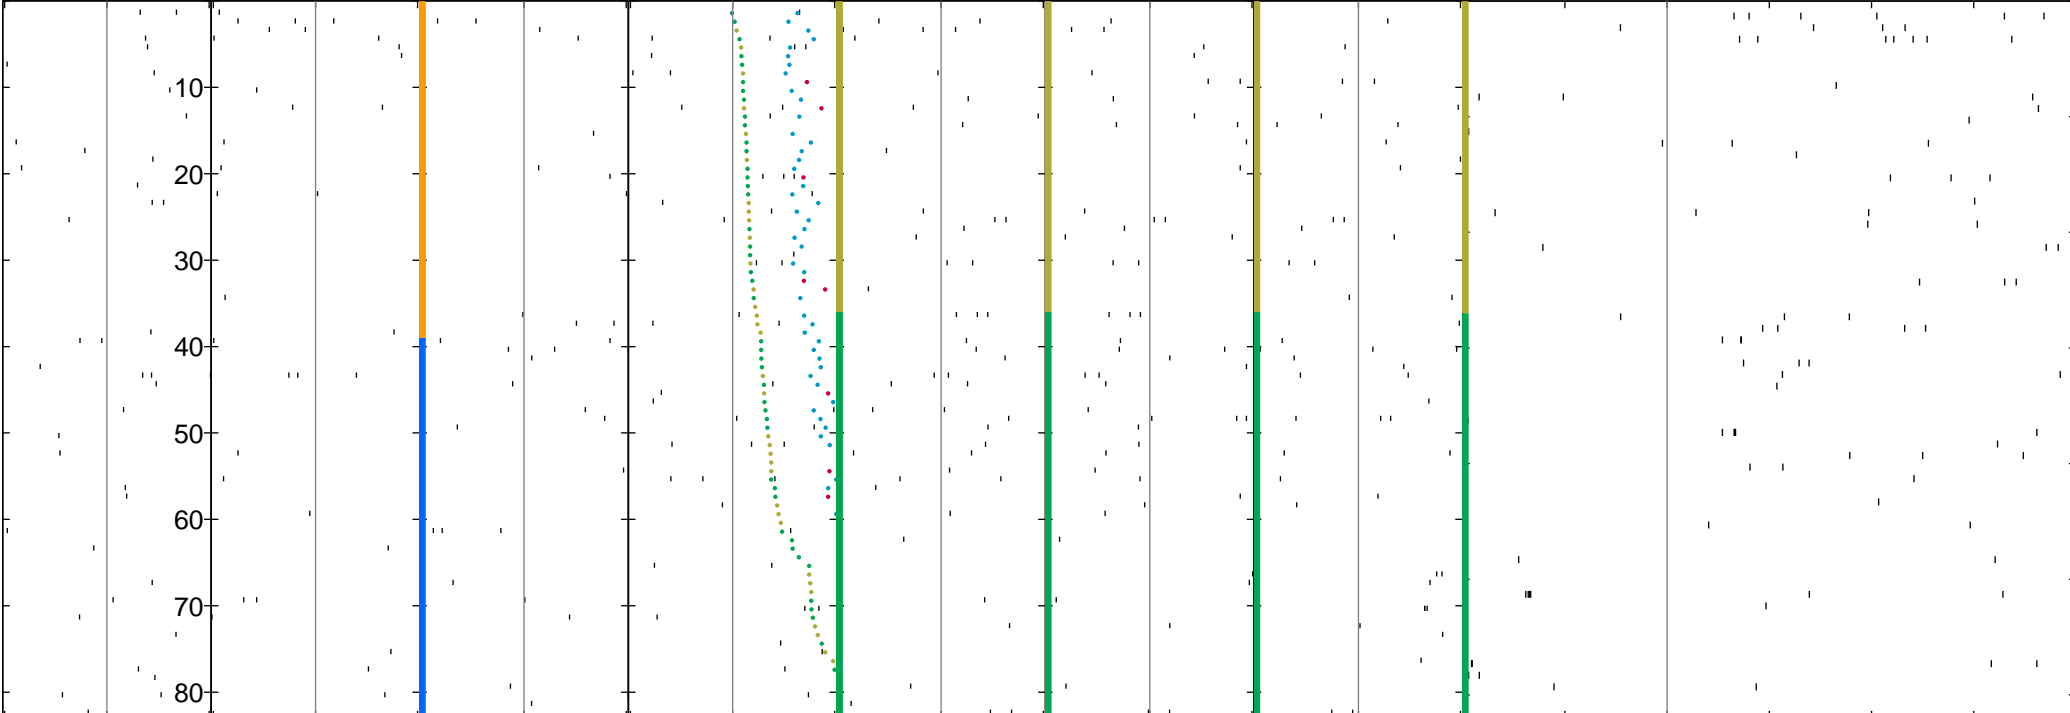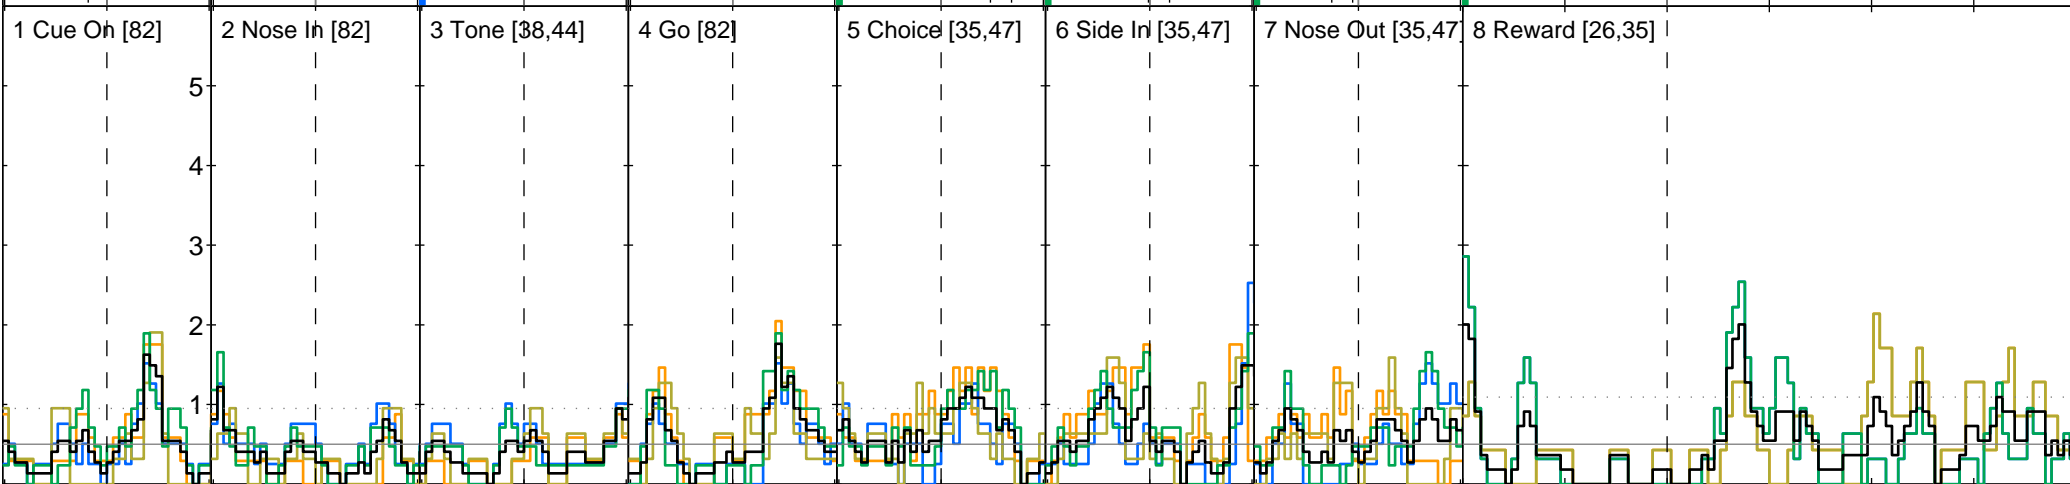

**Cell: C0320070702T07d**

AP: 0.96 ML: 3.6 DV: 7.8  
w: 4 n: 5492  $P_{ISI>2}$ : 0.72  
1/2pw: 102 $\mu$ s p->v: 426 $\mu$ s  
 $\beta_T$ : NaN  $\beta_D$ : NaN  
 $\beta_P$ : NaN SI: NaN  
Session FR: 1.12 Hz  
Pk Ev: None  
Pk FR: --

Inv

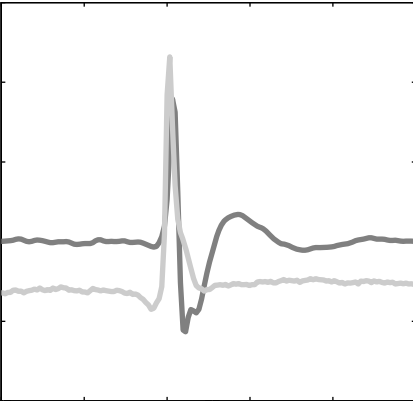

HP/PV

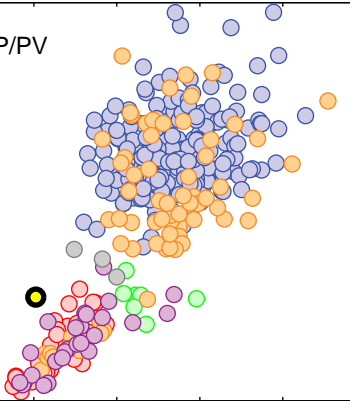

FR/PV

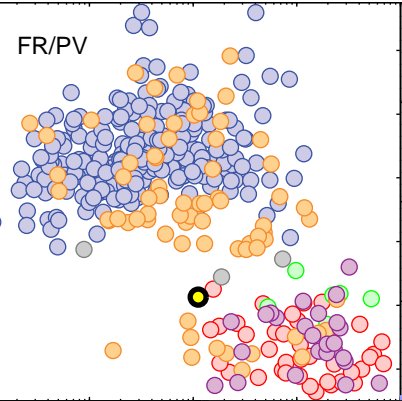

ISI Histogram [190]

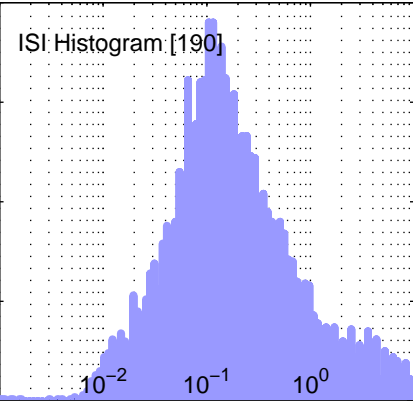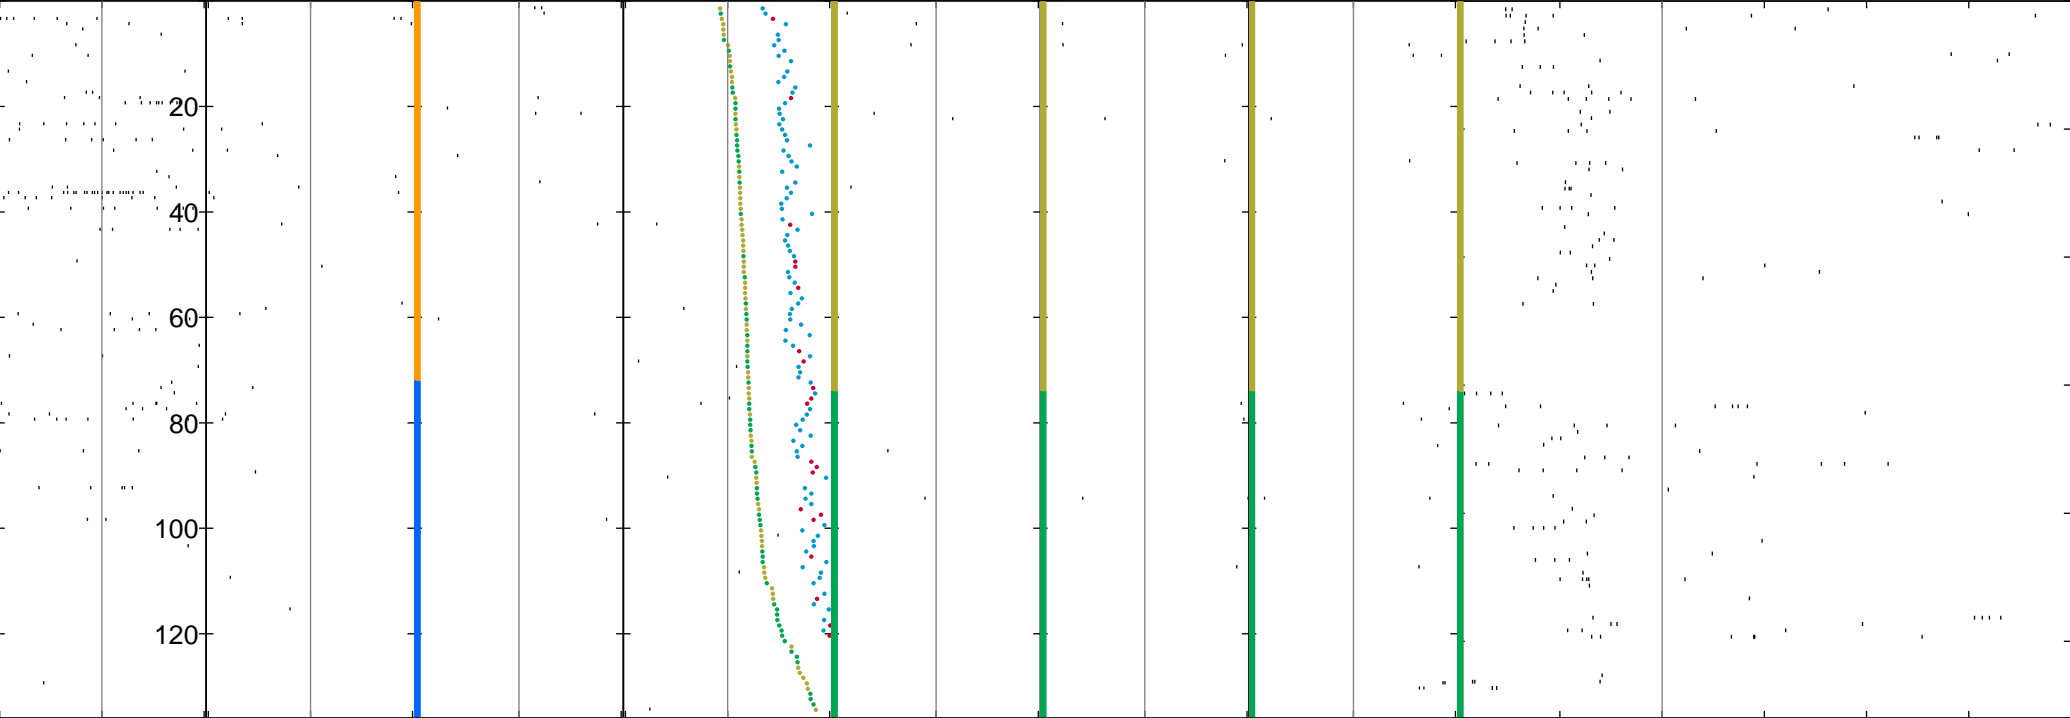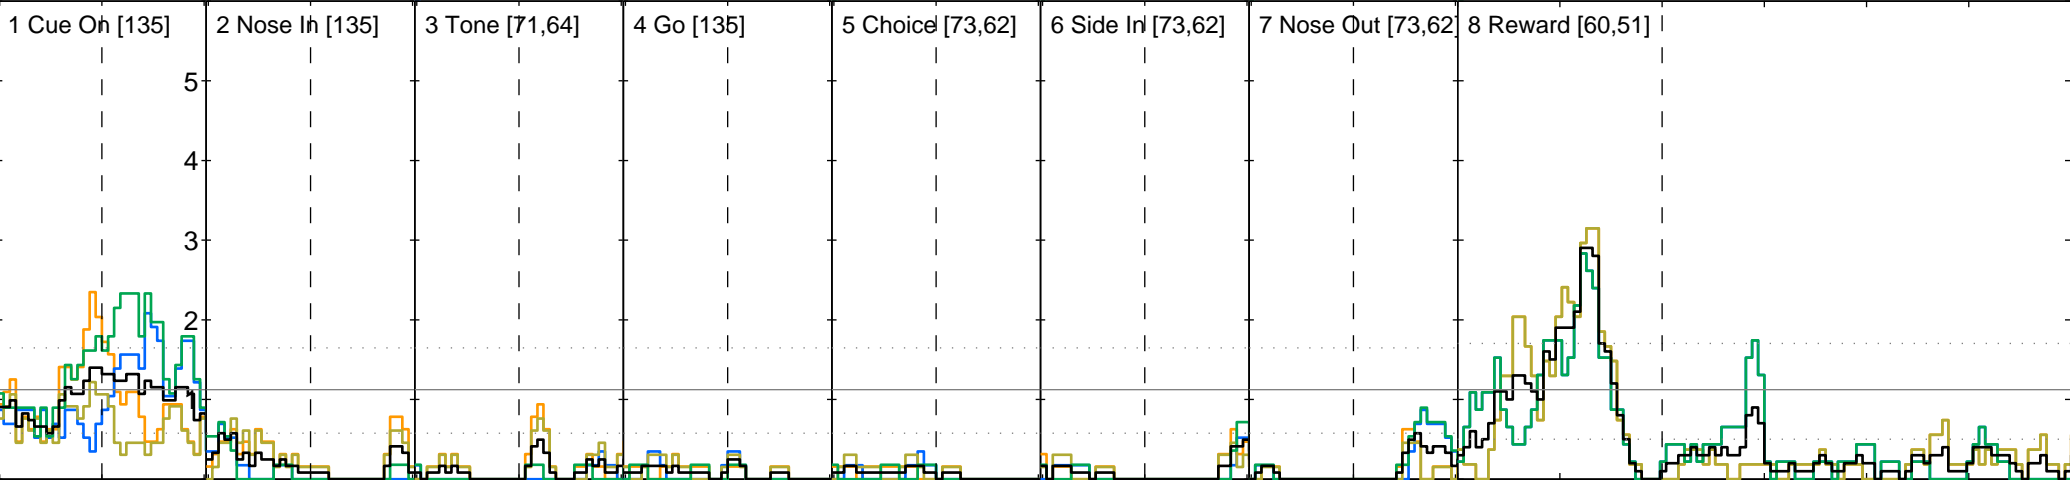

Cell: C0320070702T11a

AP: -0.96 ML: 3.7 DV: 7.4

w: 1 n: 3511  $P_{ISI>2}$ : 0.48

1/2pw: 195 $\mu$ s p->v: 466 $\mu$ s

$\beta_T$ : NaN  $\beta_D$ : NaN

$\beta_P$ : NaN SI: NaN

Session FR: 1 Hz

Pk Ev: None

Pk FR: --

Inv

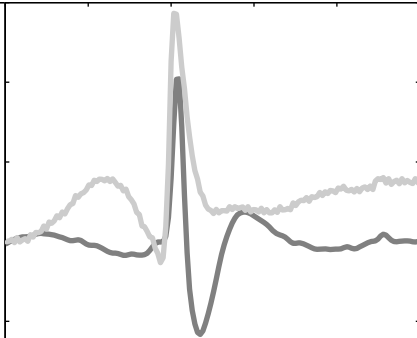

HP/PV

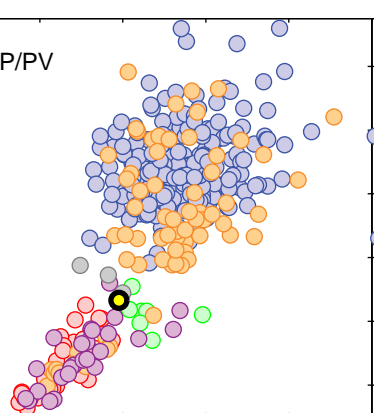

FR/PV

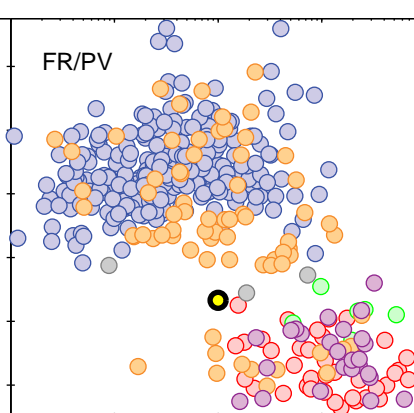

ISI Histogram [117]

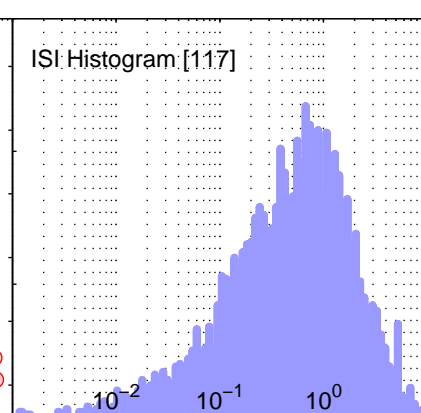

10

20

30

40

50

60

70

80

1 Cue On [87]

2 Nose In [87]

3 Tone [47,40]

4 Go [87]

5 Choice [48,39]

6 Side In [48,39]

7 Nose Out [48,39]

8 Reward [38,30]

5

4

3

2

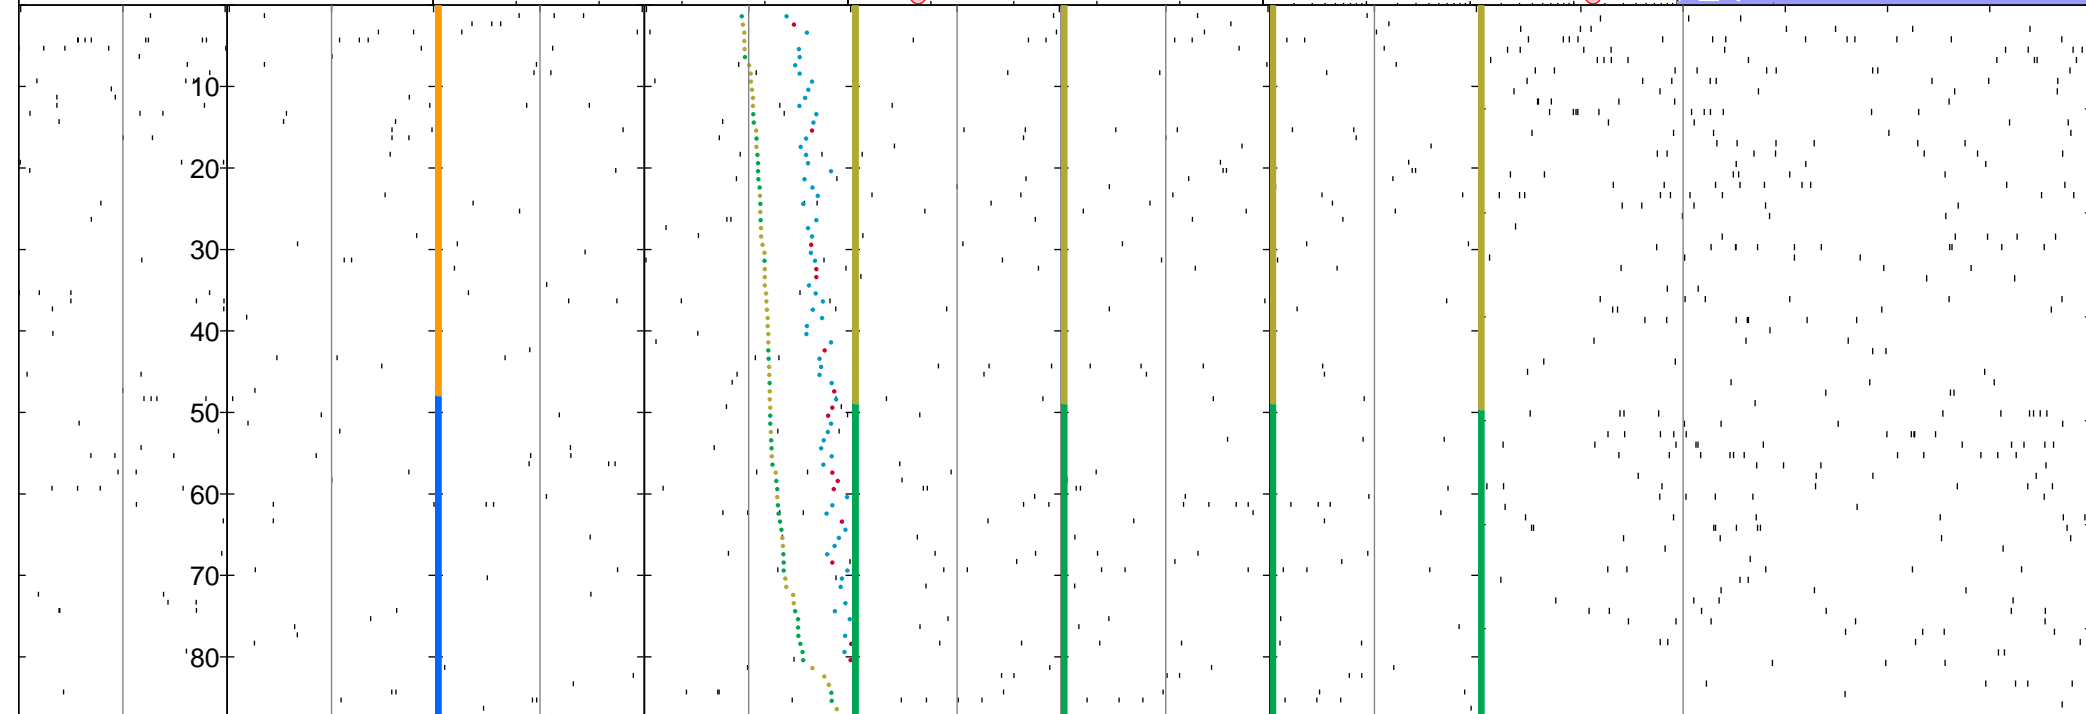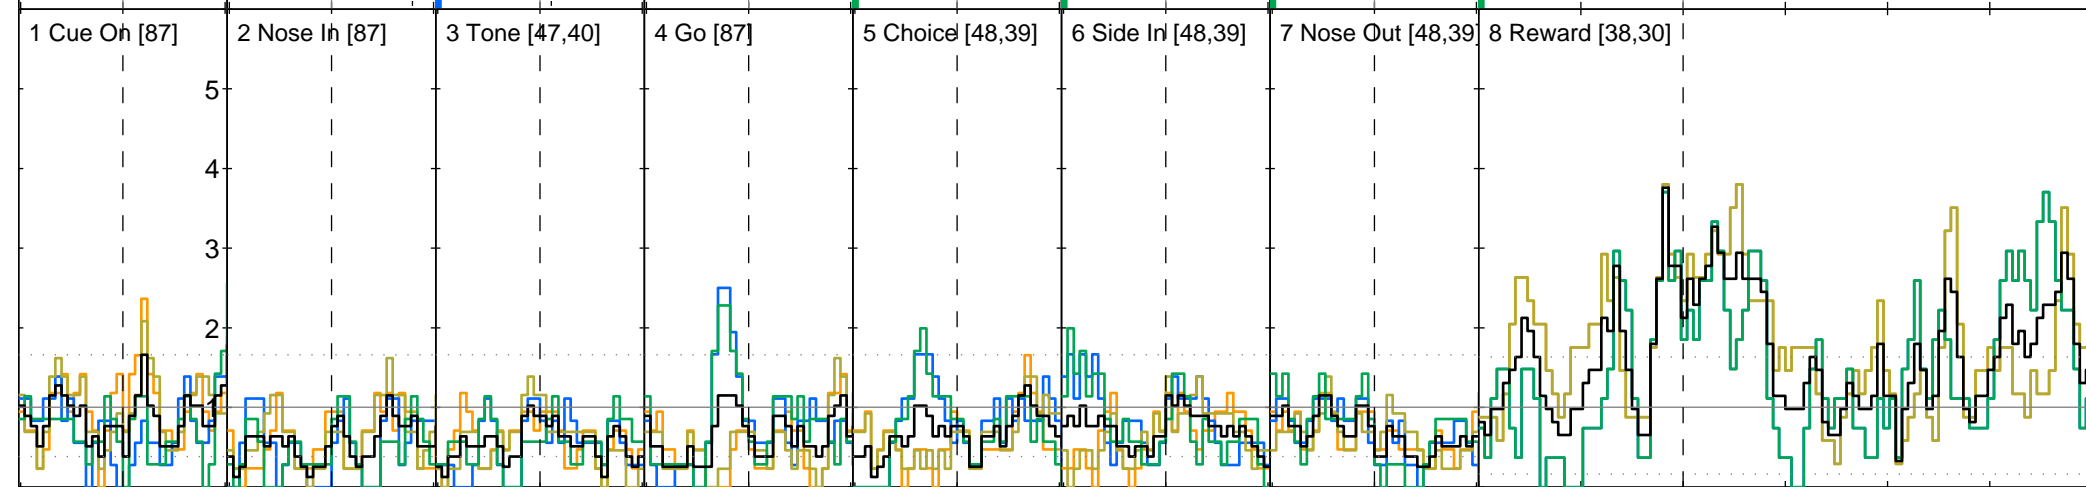

**Cell: C0420070314T05d**

AP: 2.5 ML: 1.3 DV: 6.7  
w: 2 n: 913  $P_{ISI>2}$ : 0.97  
1/2pw: 198 $\mu$ s p->v: 434 $\mu$ s  
 $\beta_T$ : NaN  $\beta_D$ : NaN  
 $\beta_P$ : NaN SI: NaN  
Session FR: 0.125 Hz  
Pk Ev: None  
Pk FR: --

Inv

Waveform

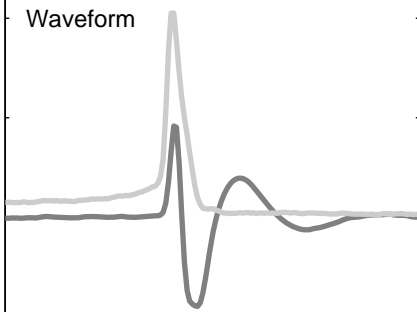

HP/PV

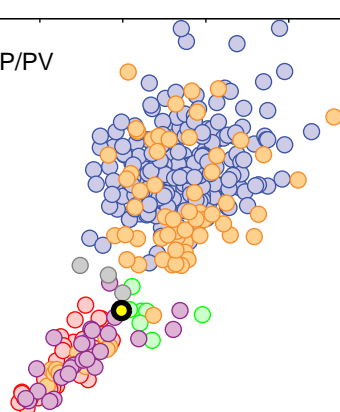

FR/PV

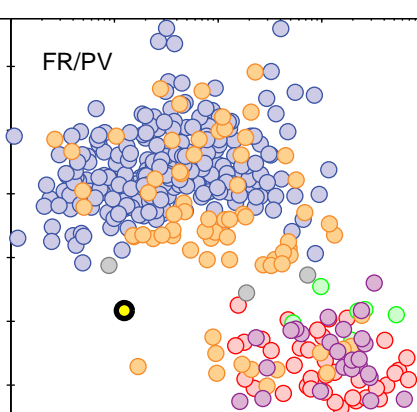

ISI Histogram [36]

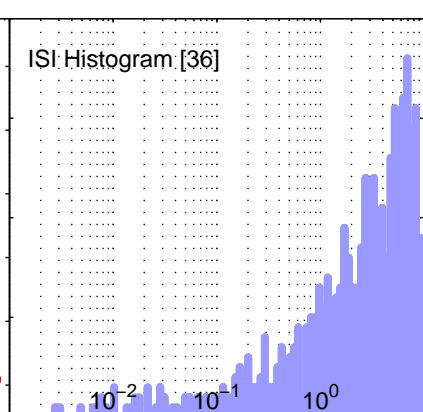

10  
20  
30  
40  
50  
60

1 Cue On [61] 2 Nose In [61] 3 Tone [33,28] 4 Go [61] 5 Choice [38,23] 6 Side In [38,23] 7 Nose Out [38,23] 8 Reward [15,11]

5  
4  
3  
2  
1

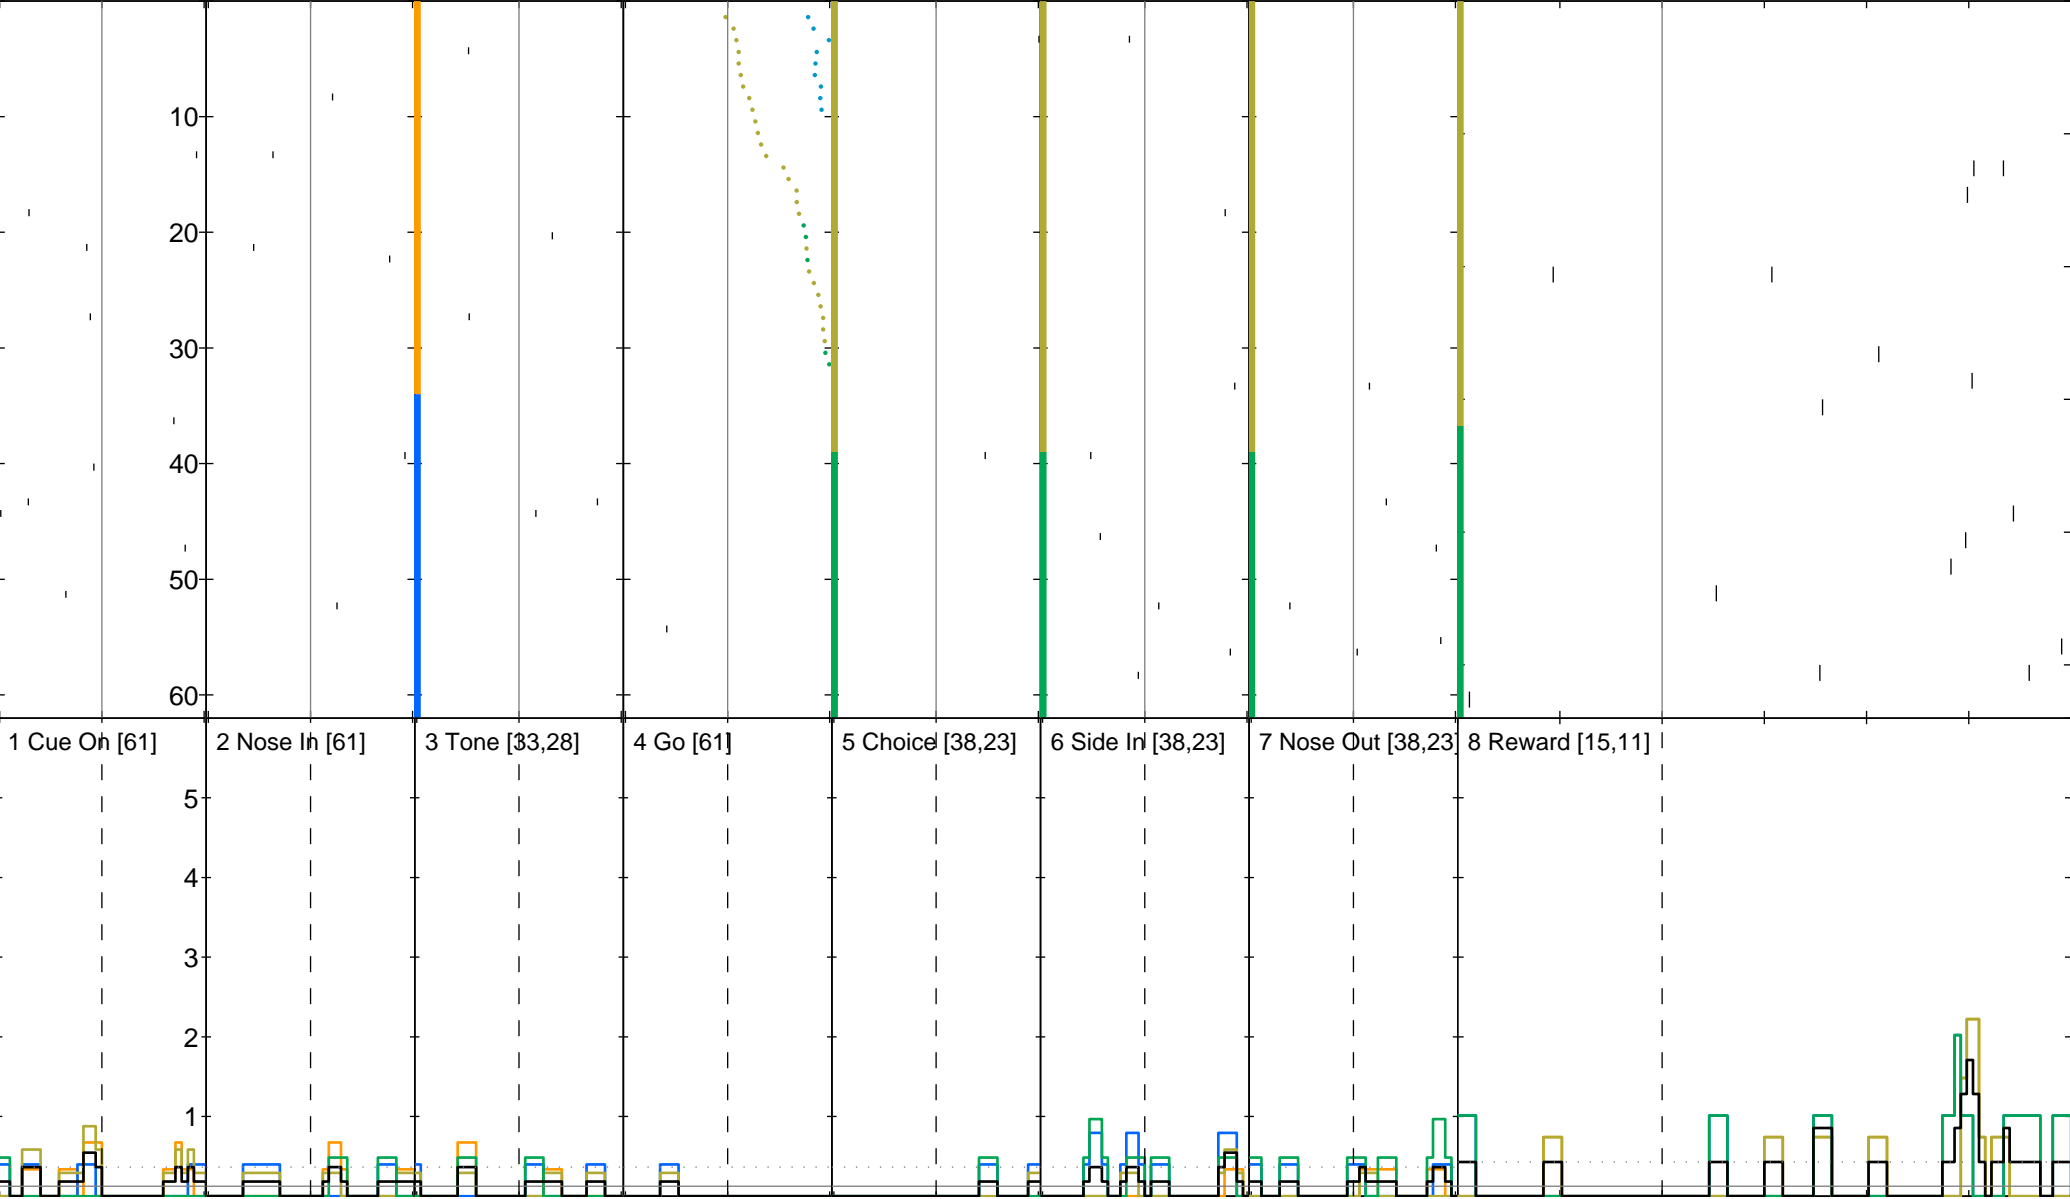

**Cell: C0520070406T11f**

AP: -0.48 ML: 4.6 DV: 4.5  
w: 4 n: 4013  $P_{ISI>2}$ : 0.56  
1/2pw: 115 $\mu$ s p->v: 262 $\mu$ s  
 $\beta_T$ : 1.6  $\beta_D$ : -3.4  
 $\beta_P$ : -2.5 SI: NaN  
Session FR: 0.92 Hz  
Pk Ev: None  
Pk FR: --

Inv

Waveform

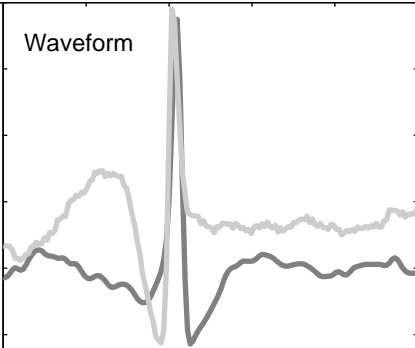

HP/PV

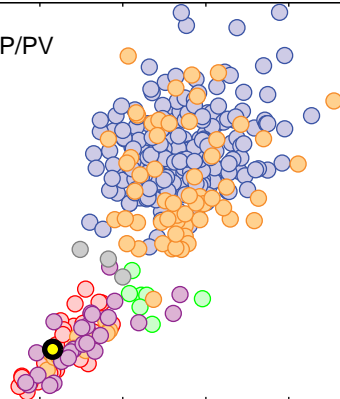

FR/PV

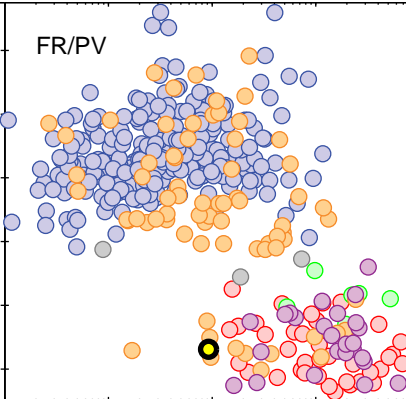

ISI Histogram [118]

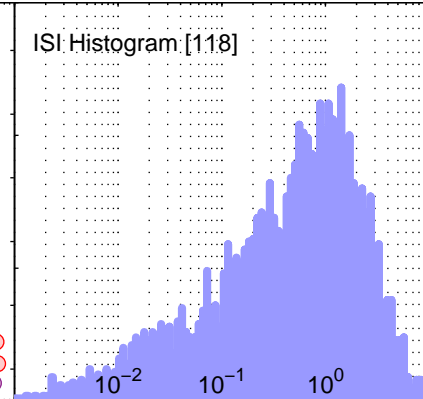

50

100

150

1 Cue On [151]

2 Nose In [151]

3 Tone [67,84]

4 Go [151]

5 Choice [75,76]

6 Side In [75,76]

7 Nose Out [75,76]

8 Reward [54,62]

5

4

3

2

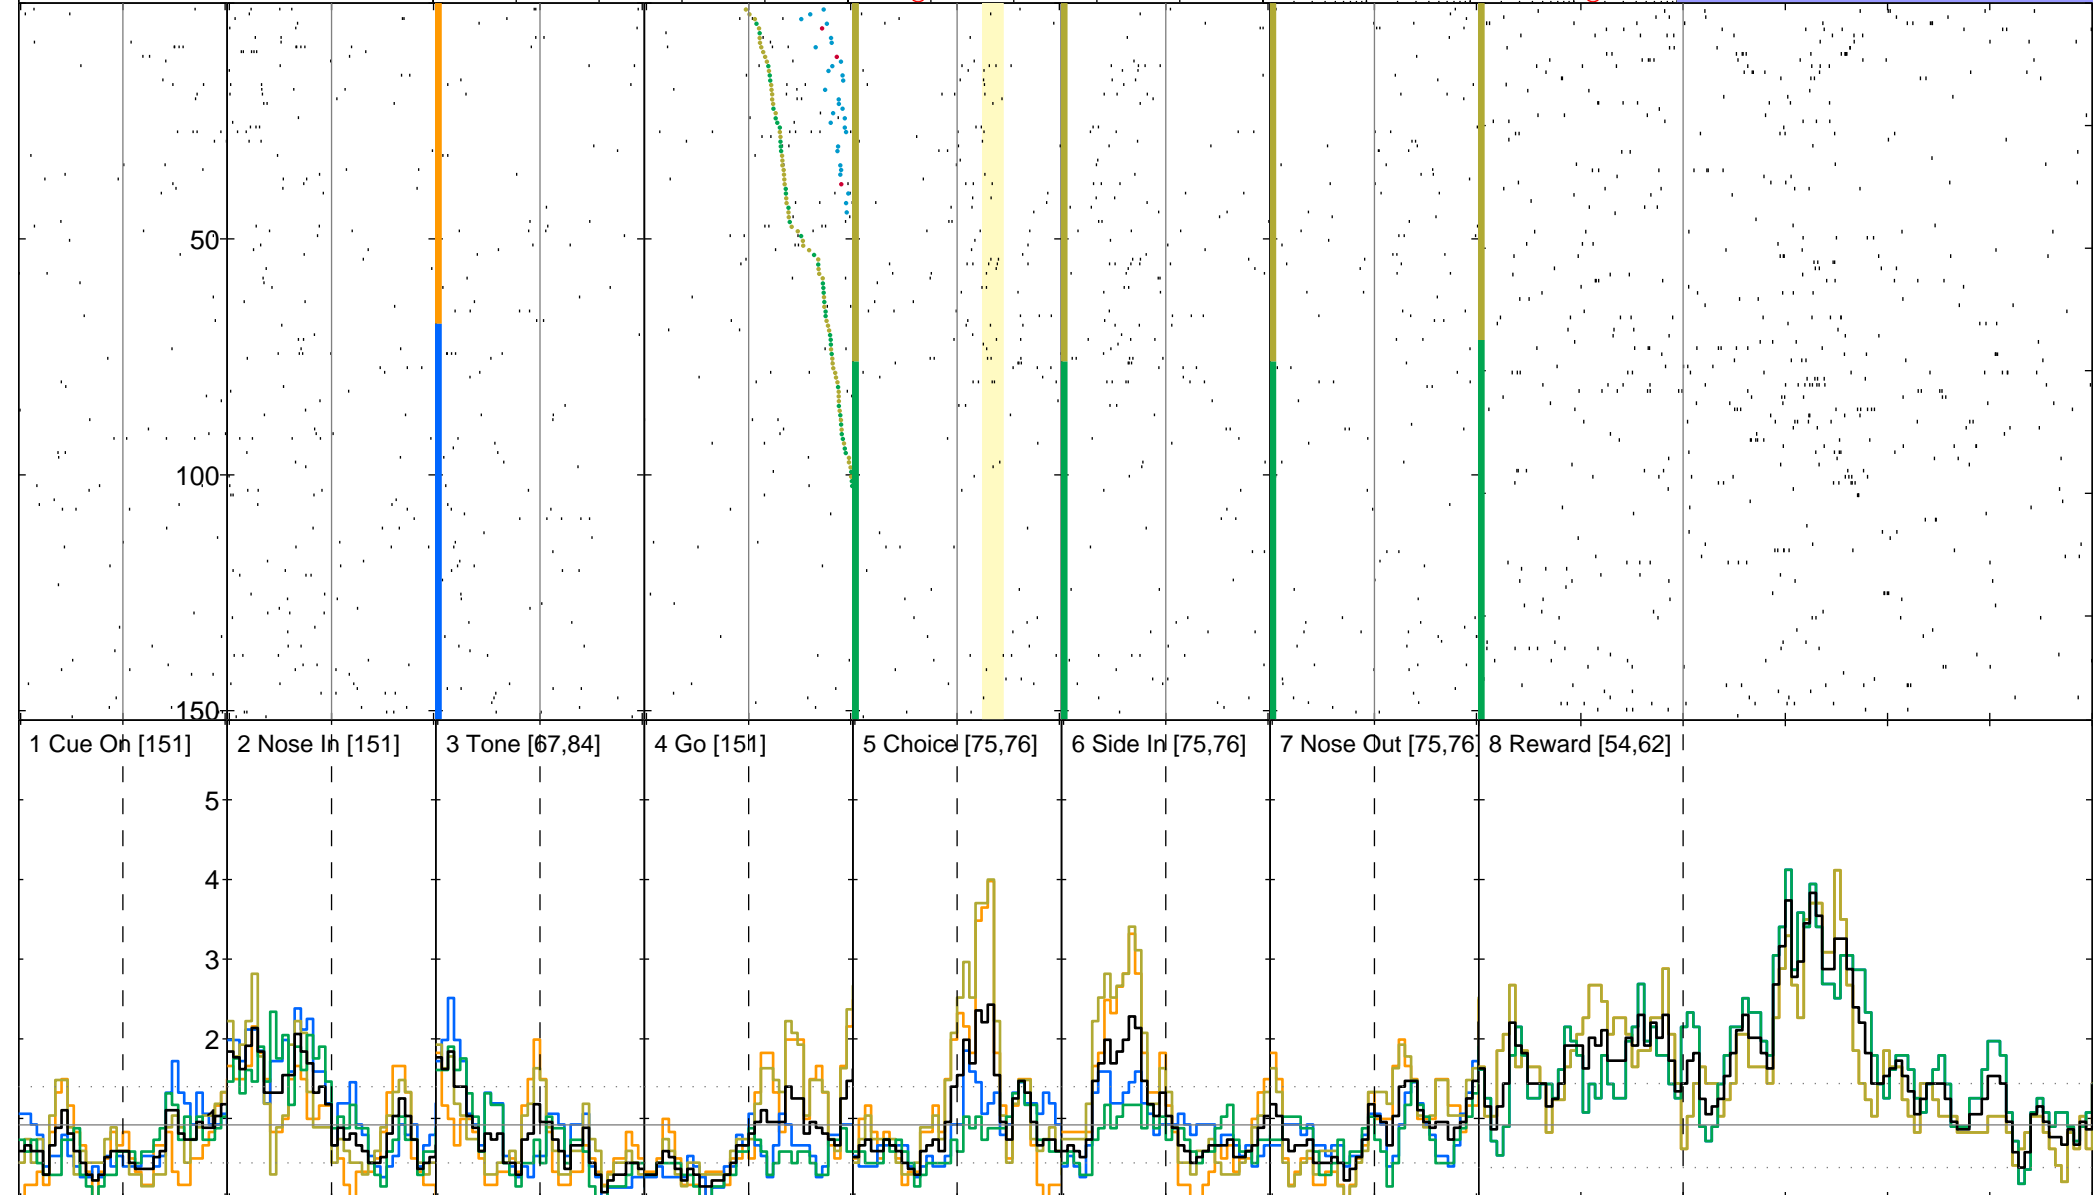

**Cell: C1220071117T05c**

AP: 1.4 ML: 2.1 DV: 7.5  
w: 3 n: 29788  $P_{ISI>2}$ : 0.4  
1/2pw: 0 $\mu$ s p->v: 0 $\mu$ s  
 $\beta_T$ : NaN  $\beta_D$ : NaN  
 $\beta_P$ : NaN SI: NaN  
Session FR: 2.9 Hz  
Pk Ev: None  
Pk FR: --

Inv

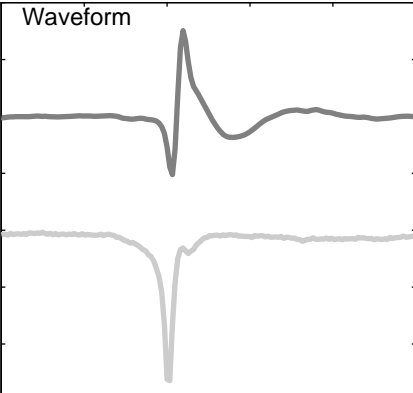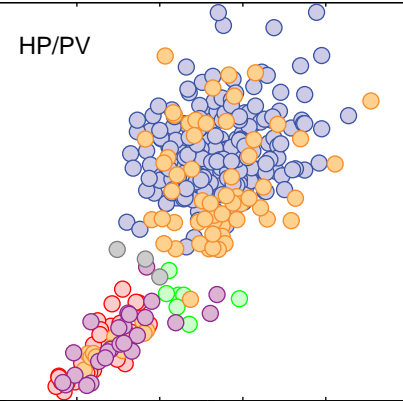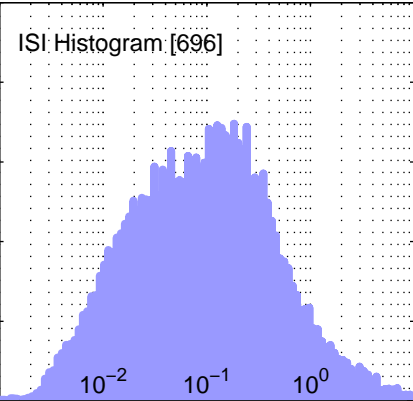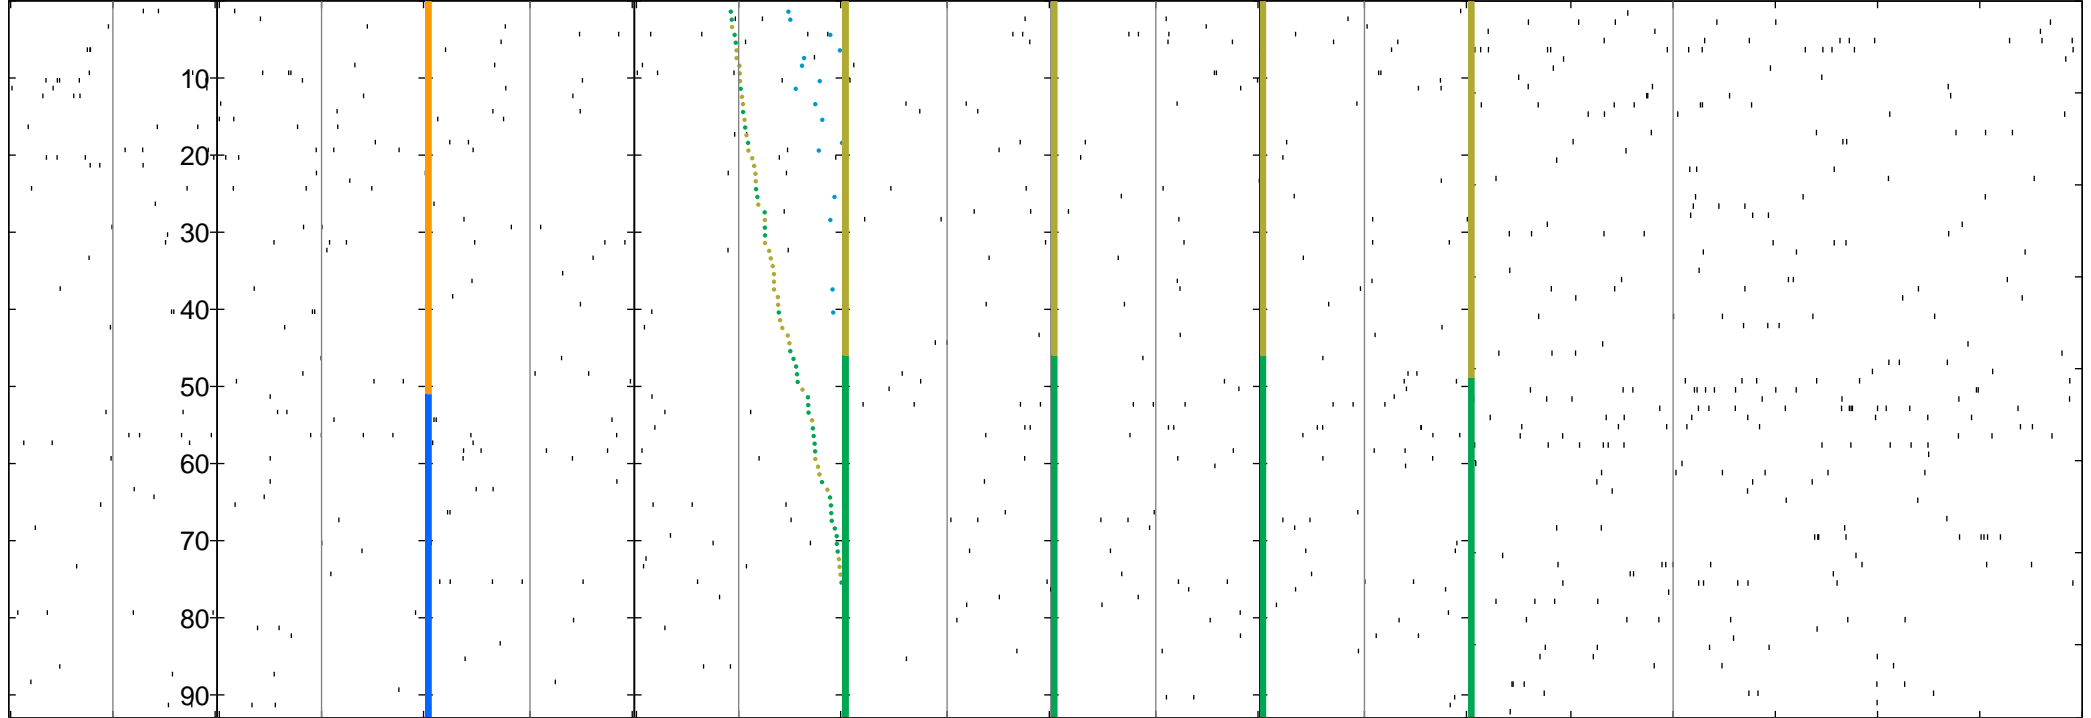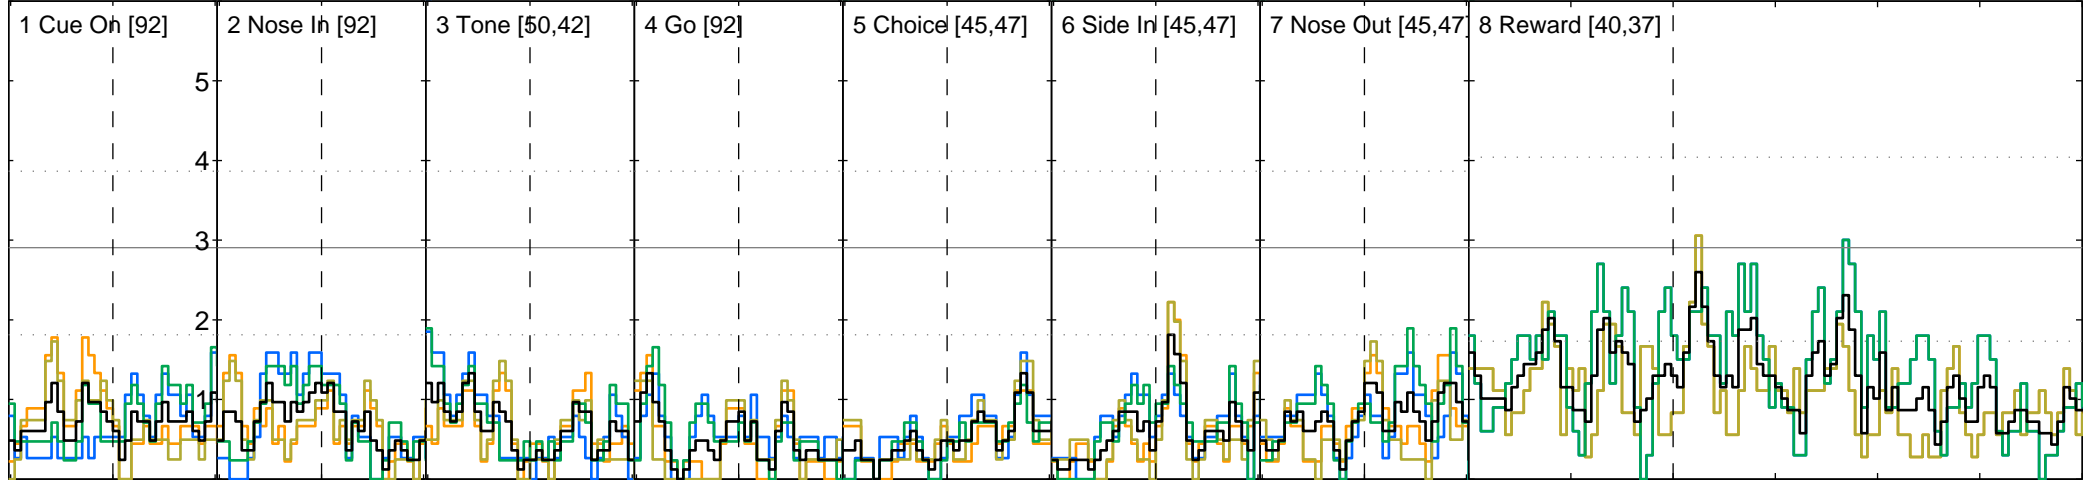



**Cell: C1220071117T05d**

AP: 1.4 ML: 2.1 DV: 7.5  
w: 3 n: 3539  $P_{ISI>2}$ : 0.89  
1/2pw: 243 $\mu$ s p->v: 629 $\mu$ s  
 $\beta_T$ : NaN  $\beta_D$ : NaN  
 $\beta_P$ : NaN SI: NaN  
Session FR: 0.346 Hz  
Pk Ev: None  
Pk FR: --

Inv

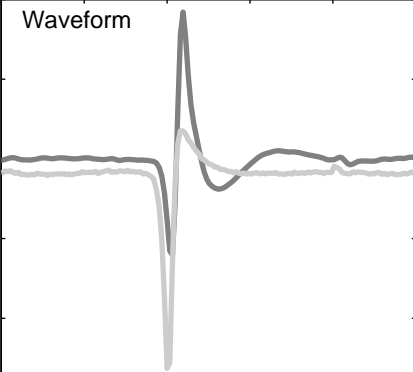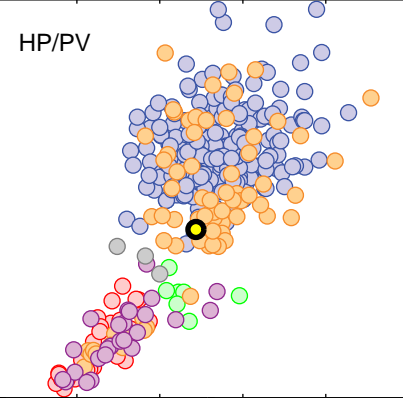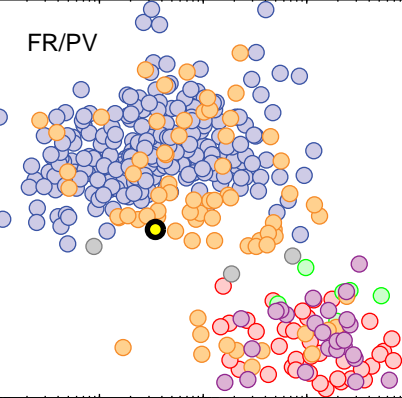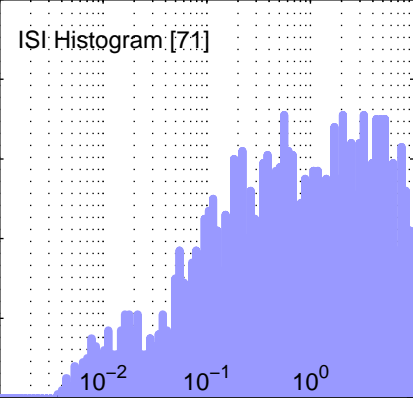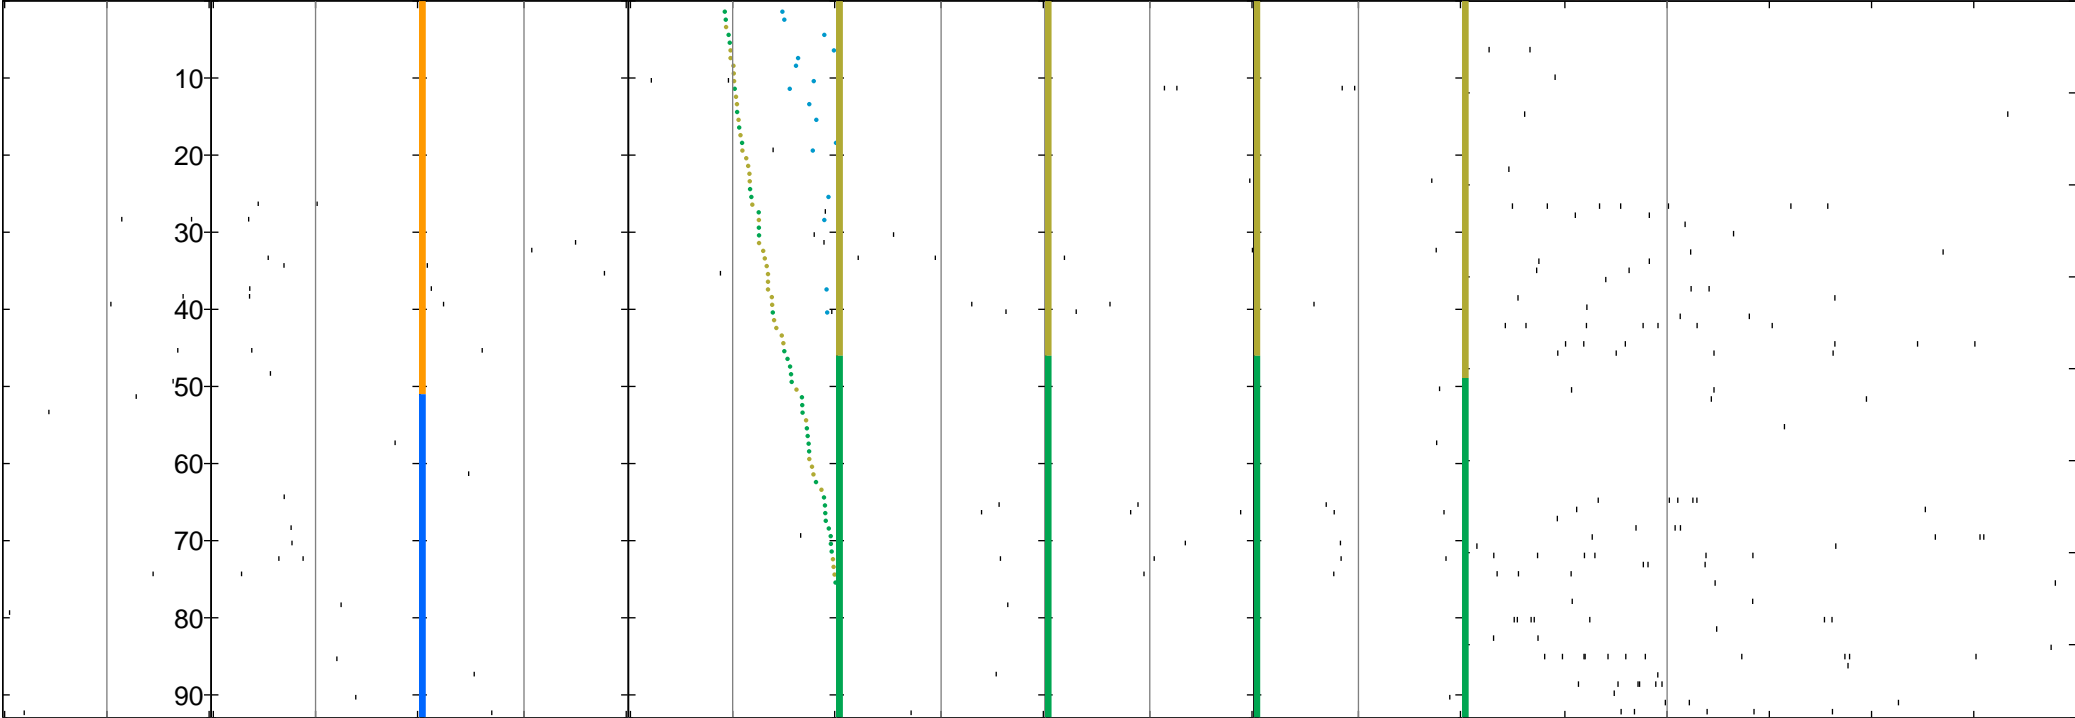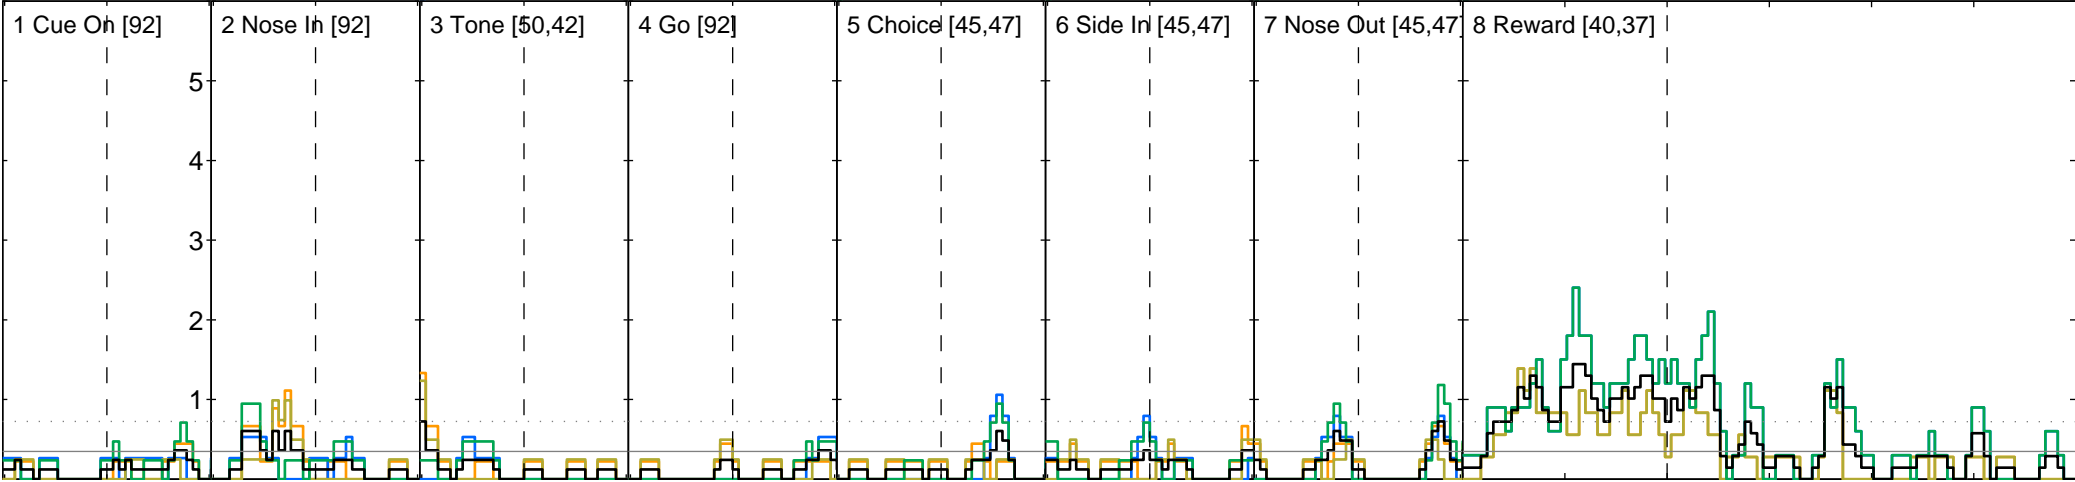

Supplement: NIHMS221555-supplement-01.pdf [file NIHMS221555-supplement-01.pdf]
